# Supplementary material
Source: PubMed Central journal article supplement (PMC8517598)
Supplement: IMM-164-555-s001.pdf [file IMM-164-555-s001.pdf]

| <b>Sample</b>                        | <b>Total reads</b> | <b>Alignment (%)</b> | <b>mRNA (%)</b> |
|--------------------------------------|--------------------|----------------------|-----------------|
| Donor 1<br>PDL1<br>Proliferating     | 57,189,491         | 98.83                | 90.83           |
| Donor 1<br>PDL1<br>Non-Proliferating | 49,031,579         | 98.53                | 86.62           |
| Donor 1<br>PDL2<br>Proliferating     | 58,789,491         | 99.12                | 91.38           |
| Donor 1<br>PDL2<br>Non-Proliferating | 57,994,668         | 98.55                | 84.69           |
| Donor 2<br>PDL1<br>Proliferating     | 68,470,774         | 98.75                | 87.41           |
| Donor 2<br>PDL1<br>Non-Proliferating | 55,291,232         | 98.93                | 87.84           |
| Donor 2<br>PDL2<br>Proliferating     | 50,123,446         | 98.99                | 87.30           |
| Donor 2<br>PDL2<br>Non-Proliferating | 55,509,508         | 98.67                | 85.45           |
