# Supplementary material
Source: PubMed Central journal article supplement (PMC8517598)
Supplement: IMM-164-555-s003.pdf [file IMM-164-555-s003.pdf]

| <b>Cytokine</b> | <b>Anti-CD3 + PDL2<br/>relative to Anti-CD3</b> |
|-----------------|-------------------------------------------------|
| IL1RA           | No change                                       |
| IL1A            | No change                                       |
| IL1B            | No change                                       |
| MCP1            | No change                                       |
| IL15            | No change                                       |
| GM-CSF          | Inhibited                                       |
| IFN- $\gamma$   | Inhibited                                       |
| IFN- $\alpha$ 2 | Inhibited                                       |
| IL10            | Inhibited                                       |
| IL12 p40        | Inhibited                                       |
| IL12 p70        | Inhibited                                       |
| IL2             | Inhibited                                       |
| IL4             | Inhibited                                       |
| IL6             | Inhibited                                       |
| IL17A           | Inhibited                                       |
| IP10            | Inhibited                                       |
| MIP-1 $\alpha$  | Inhibited                                       |
| MIP-1 $\beta$   | Inhibited                                       |
| sCD40L          | Inhibited                                       |
| TNF $\alpha$    | Inhibited                                       |
