# Supplementary material
Source: PubMed Central journal article supplement (PMC8517598)
Supplement: IMM-164-555-s005.pdf [file IMM-164-555-s005.pdf]

#1.2

Differential\_Expression\_DESeq2\_compare\_2\_groups\_on\_L1\_Proliferating  
\_on\_L1\_Non\_Proliferating.norm

19874 4

| Name        | Description | L1_CFSE_Lo_2_0 | L1_CFSE_Lo_3_0 | L1_CFSE_Hi_2_0 | L1_CFSE_Hi_3_0 |
|-------------|-------------|----------------|----------------|----------------|----------------|
| IFI6        | IFI6        | 7857.378577    | 4686.029547    | 21826.18711    |                |
| 4437.939401 |             |                |                |                |                |
| LRR75B      | LRR75B      | 20.83356377    | 50.17916291    | 6.690360818    |                |
| 19.61520177 |             |                |                |                |                |
| ASNSD1      | ASNSD1      | 5567.769919    | 4497.637602    | 5435.918164    |                |
| 5168.605667 |             |                |                |                |                |
| COMMD6      | COMMD6      | 2466.693951    | 3200.022056    | 3244.824997    |                |
| 2973.664589 |             |                |                |                |                |
| PIANP       | PIANP       | 3.125034566    | 5.282017149    | 4.460240545    |                |
| 13.73064124 |             |                |                |                |                |
| GPR151      | GPR151      | 0              | 1.760672383    | 6.690360818    | 0              |
| NSMF        | NSMF        | 794.800458     | 1248.316719    | 1388.24987     |                |
| 1517.235857 |             |                |                |                |                |
| FBXL3       | FBXL3       | 4507.341522    | 4621.765005    | 6103.839186    |                |
| 5225.489752 |             |                |                |                |                |
| EPB41L1     | EPB41L1     | 5.208390943    | 0              | 0              | 0              |
| FNDC8       | FNDC8       | 65.62572589    | 88.03361914    | 64.6734879     |                |
| 46.09572417 |             |                |                |                |                |
| FIGF        | FIGF        | 7.291747321    | 0.880336191    | 0              | 0              |
| DFFB        | DFFB        | 837.5092637    | 743.0037456    | 357.9343037    |                |
| 838.5498758 |             |                |                |                |                |
| PPM1H       | PPM1H       | 5.208390943    | 5.282017149    | 4.460240545    | 0              |
| LRR46       | LRR46       | 48.95887487    | 85.39261057    | 39.02710477    |                |
| 143.1909729 |             |                |                |                |                |
| SNX6        | SNX6        | 7843.836761    | 5881.526095    | 6703.741539    |                |
| 6430.843901 |             |                |                |                |                |
| GNAS        | GNAS        | 8318.842015    | 9677.535752    | 7703.950481    |                |
| 7702.889736 |             |                |                |                |                |
| FHL2        | FHL2        | 551.0477618    | 590.7055845    | 239.7379293    |                |
| 285.4011858 |             |                |                |                |                |
| BDH1        | BDH1        | 4471.924464    | 3323.269123    | 2943.75876     |                |
| 3411.083588 |             |                |                |                |                |
| FOLR1       | FOLR1       | 0              | 0              | 0.980760089    |                |
| ER01LB      | ER01LB      | 184.3770394    | 259.6991765    | 674.6113824    |                |
| 388.3809951 |             |                |                |                |                |
| ZNF790      | ZNF790      | 343.7538023    | 289.630607     | 544.1493465    |                |
| 624.7441765 |             |                |                |                |                |
| NPIPA5      | NPIPA5      | 16.66685102    | 50.17916291    | 24.531323      |                |
| 37.26888337 |             |                |                |                |                |
| NPIPA2      | NPIPA2      | 0              | 3.521344766    | 2.230120273    | 1.961520177    |
| KLF5        | KLF5        | 328.1286294    | 144.3751354    | 477.2457383    |                |
| 165.748455  |             |                |                |                |                |
| SPTLC2      | SPTLC2      | 3872.959506    | 4471.227516    | 2737.472635    |                |
| 3016.818033 |             |                |                |                |                |

|              |              |             |             |             |             |
|--------------|--------------|-------------|-------------|-------------|-------------|
| AQP3         | AQP3         | 9516.771932 | 8500.526265 | 2746.393116 |             |
| 3674.908052  |              |             |             |             |             |
| CLTC         | CLTC         | 25722.15951 | 31917.46896 | 21478.28834 |             |
| 25123.15043  |              |             |             |             |             |
| TBC1D9       | TBC1D9       | 1.041678189 | 0           | 8.92048109  | 3.923040355 |
| HAT1         | HAT1         | 11487.62707 | 10531.46186 | 8265.94079  |             |
| 9383.912528  |              |             |             |             |             |
| PYCR2        | PYCR2        | 4797.969737 | 5564.605066 | 5576.415741 |             |
| 5266.681676  |              |             |             |             |             |
| NFX1         | NFX1         | 5387.559592 | 4312.767002 | 6087.113284 |             |
| 4891.050562  |              |             |             |             |             |
| GPT2         | GPT2         | 1264.597321 | 691.9442465 | 1199.804707 |             |
| 705.1665038  |              |             |             |             |             |
| KCNC2        | KCNC2        | 1.041678189 | 0           | 5.575300681 | 0           |
| ZFAND6       | ZFAND6       | 4441.715797 | 5171.975125 | 4964.247727 |             |
| 4849.858638  |              |             |             |             |             |
| CD19         | CD19         | 3.125034566 | 11.44437049 | 34.56686422 |             |
| 39.23040355  |              |             |             |             |             |
| RABL6        | RABL6        | 1432.307509 | 3368.166268 | 1287.894457 |             |
| 1534.889539  |              |             |             |             |             |
| IL15         | IL15         | 203.1272468 | 220.0840479 | 516.2728431 |             |
| 209.882659   |              |             |             |             |             |
| CXCL8        | CXCL8        | 238.5443052 | 2421.804863 | 0           | 340.3237508 |
| RASAL1       | RASAL1       | 42.70880574 | 13.20504287 | 84.74457036 |             |
| 147.1140133  |              |             |             |             |             |
| UTY          | UTY          | 0           | 1561.716404 | 0           | 1688.868873 |
| DACT3-AS1    | DACT3-AS1    | 0           | 7.042689532 | 8.92048109  |             |
| 1.961520177  |              |             |             |             |             |
| ZNF790-AS1   | ZNF790-AS1   | 81.25089872 | 79.23025723 |             |             |
| 109.2758934  | 117.6912106  |             |             |             |             |
| TGFB2-AS1    | TGFB2-AS1    | 0           | 0           | 1.115060136 | 0           |
| LOC100652999 | LOC100652999 | 387.5042862 | 559.8938178 |             |             |
| 443.7939342  | 533.5334882  |             |             |             |             |
| LOC400684    | LOC400684    | 23.95859834 | 22.00840479 |             |             |
| 8.92048109   | 24.51900222  |             |             |             |             |
| SLX1A        | SLX1A        | 61.45901313 | 72.1875677  | 92.54999131 |             |
| 75.51852683  |              |             |             |             |             |
| AKR1E2       | AKR1E2       | 82.29257691 | 70.42689532 | 22.30120273 |             |
| 49.03800443  |              |             |             |             |             |
| CPEB1        | CPEB1        | 1.041678189 | 1.760672383 | 60.21324736 |             |
| 33.34584301  |              |             |             |             |             |
| MORF4L2      | MORF4L2      | 7459.457509 | 5962.517025 | 7312.564374 |             |
| 7445.930593  |              |             |             |             |             |
| LTBP4        | LTBP4        | 782.3003197 | 1439.349673 | 1438.427576 |             |
| 2512.707347  |              |             |             |             |             |
| ASB9         | ASB9         | 19.79188559 | 31.69210289 | 7.805420954 |             |
| 25.49976231  |              |             |             |             |             |
| SPAG9        | SPAG9        | 1435.432544 | 2720.238832 | 1824.238383 |             |
| 1656.50379   |              |             |             |             |             |
| CSDE1        | CSDE1        | 29455.53414 | 26730.52812 | 28854.41115 |             |

|             |          |             |             |             |             |
|-------------|----------|-------------|-------------|-------------|-------------|
| 26585.46372 |          |             |             |             |             |
| NBPF6       | NBPF6    | 3.125034566 | 0           | 0           | 0           |
| HLA-G       | HLA-G    | 3.125034566 | 3.521344766 | 2.230120273 |             |
| 3.923040355 |          |             |             |             |             |
| VIL1        | VIL1     | 2.083356377 | 2.641008574 | 0           | 2.942280266 |
| RAPGEFL1    | RAPGEFL1 |             | 51.04223125 | 83.63193819 |             |
| 33.45180409 |          |             |             |             |             |
| TIMP4       | TIMP4    | 1.041678189 | 20.2477324  | 20.07108245 |             |
| 17.6536816  |          |             |             |             |             |
| C1orf112    | C1orf112 |             | 3785.458538 | 2777.460684 |             |
| 1995.957644 |          |             |             |             |             |
| HAMP        | HAMP     | 0           | 0           | 0.980760089 |             |
| CCDC81      | CCDC81   | 23.95859834 | 7.042689532 | 37.91204463 |             |
| 9.807600887 |          |             |             |             |             |
| CCDC90B     | CCDC90B  | 3553.164302 | 2487.830077 | 4316.397787 |             |
| 3071.740598 |          |             |             |             |             |
| IFT74       | IFT74    | 1076.053569 | 978.9338449 | 1045.926408 |             |
| 876.7995193 |          |             |             |             |             |
| ASPN        | ASPN     | 8.33342551  | 11.44437049 | 1.115060136 |             |
| 0.980760089 |          |             |             |             |             |
| ZC2HC1B     | ZC2HC1B  | 1.041678189 | 0.880336191 | 0           | 0           |
| ALG10B      | ALG10B   | 310.4201002 | 360.9378385 | 204.0560049 |             |
| 195.1712576 |          |             |             |             |             |
| COPG2       | COPG2    | 139.5848773 | 156.6998421 | 189.5602232 |             |
| 156.9216142 |          |             |             |             |             |
| HRAS        | HRAS     | 2432.318571 | 1730.740952 | 1825.353443 |             |
| 1409.352247 |          |             |             |             |             |
| SPAG8       | SPAG8    | 21.87524196 | 34.33311147 | 47.94758586 |             |
| 63.74940576 |          |             |             |             |             |
| SLC12A1     | SLC12A1  | 0           | 0.880336191 | 5.575300681 | 3.923040355 |
| PADI4       | PADI4    | 17.70852921 | 7.042689532 | 148.3029981 |             |
| 36.28812328 |          |             |             |             |             |
| FAM198B     | FAM198B  | 2.083356377 | 0           | 4.460240545 | 0           |
| SLC25A37    | SLC25A37 |             | 300.0033183 | 310.7586756 |             |
| 384.695747  |          |             |             |             |             |
| NEDD4L      | NEDD4L   | 105.2094971 | 170.7852211 | 63.55842777 |             |
| 134.3641321 |          |             |             |             |             |
| DTNA        | DTNA     | 0           | 0           | 1.115060136 | 0           |
| MZT1        | MZT1     | 3084.409117 | 2685.025384 | 2492.159405 |             |
| 1879.13633  |          |             |             |             |             |
| GRM4        | GRM4     | 1.041678189 | 0           | 0           | 0.980760089 |
| C20orf24    | C20orf24 |             | 15871.00888 | 9978.61073  |             |
| 10724.64839 |          |             |             |             |             |
| GSTM4       | GSTM4    | 704.1744556 | 848.6440885 | 557.5300681 |             |
| 749.3007077 |          |             |             |             |             |
| FAM159B     | FAM159B  | 0           | 0.880336191 | 2.230120273 | 5.884560532 |
| EHD2        | EHD2     | 0           | 14.96571525 | 0           | 13.73064124 |
| DYNLL2      | DYNLL2   | 46.87551849 | 139.0931182 | 62.44336763 |             |
| 32.36508293 |          |             |             |             |             |
| TRPM8       | TRPM8    | 0           | 4.401680957 | 0           | 0           |

|               |                 |               |             |
|---------------|-----------------|---------------|-------------|
| LOC150776     | LOC150776       | 869.8012876   | 1069.608473 |
| 1501.986004   | 1240.661512     |               |             |
| LMCD1 LMCD1   | 522.9224507     | 198.9559793   | 197.3656441 |
| 133.3833721   |                 |               |             |
| LINC00493     | LINC00493       | 1628.143009   | 2188.515772 |
| 2081.817274   | 1792.829442     |               |             |
| ASPM ASPM     | 5613.603759     | 7340.243164   | 2767.579258 |
| 4124.096173   |                 |               |             |
| DOK3 DOK3     | 16.66685102     | 46.65781815   | 23.41626286 |
| 36.28812328   |                 |               |             |
| USP4 USP4     | 8049.047364     | 6289.121752   | 7524.4258   |
| 7184.067649   |                 |               |             |
| KHDC1 KHDC1   | 326.0452731     | 432.24507     | 177.2945617 |
| 265.785984    |                 |               |             |
| TRPC1 TRPC1   | 18.7502074      | 41.375801     | 63.55842777 |
| 71.59548647   |                 |               |             |
| SPP1 SPP1     | 1258.347252     | 14.96571525   | 410.3421301 |
| 56.88408514   |                 |               |             |
| ZFYVE1 ZFYVE1 | 1411.473946     | 1379.486812   | 1687.085986 |
| 963.1064071   |                 |               |             |
| UPK1A UPK1A   | 18.7502074      | 4.401680957   | 41.25722504 |
| 28.44204257   |                 |               |             |
| DKK3 DKK3     | 0 0             | 0 6.865320621 |             |
| HSP90AA1      | HSP90AA1        | 58513.14722   | 55584.42713 |
| 62307.33029   | 52408.87686     |               |             |
| CIZ1 CIZ1     | 2765.655591     | 3711.497383   | 2475.433503 |
| 2803.993094   |                 |               |             |
| LACTB LACTB   | 2481.277445     | 1489.528836   | 2664.993726 |
| 1854.617328   |                 |               |             |
| ZFH3 ZFH3     | 133.3348082     | 149.6571525   | 69.13372845 |
| 128.4795716   |                 |               |             |
| STX12 STX12   | 1498.974914     | 1249.197056   | 1449.578177 |
| 1483.890014   |                 |               |             |
| CDC27 CDC27   | 7195.912928     | 6944.972214   | 4753.501361 |
| 5572.678824   |                 |               |             |
| GPHA2 GPHA2   | 1.041678189     | 2.641008574   | 0 0         |
| UBTD1 UBTD1   | 92.70935879     | 97.71731725   | 210.7463658 |
| 142.2102129   |                 |               |             |
| NAA25 NAA25   | 3893.793069     | 2783.623037   | 4284.061044 |
| 4705.686905   |                 |               |             |
| CHN2 CHN2     | 60.41733494     | 43.13647338   | 140.4975772 |
| 34.3266031    |                 |               |             |
| ZNF706 ZNF706 | 10198.02947     | 10634.46119   | 7674.958918 |
| 8926.878327   |                 |               |             |
| NR1I3 NR1I3   | 285.4198237     | 292.2716156   | 254.2337111 |
| 212.8249392   |                 |               |             |
| NLGN4X NLGN4X | 0 0.880336191 0 | 0             | 0           |
| ARL4A ARL4A   | 1114.595662     | 643.5257559   | 1285.664337 |
| 958.2026066   |                 |               |             |
| ASIC4 ASIC4   | 0 0.880336191 0 | 0             | 0           |

|             |         |             |             |             |
|-------------|---------|-------------|-------------|-------------|
| SNORA7B     | SNORA7B | 8.33342551  | 4.401680957 | 15.61084191 |
| 4.903800443 |         |             |             |             |
| TGIF1       | TGIF1   | 680.2158572 | 1030.87368  | 2784.30516  |
| 2982.49143  |         |             |             |             |
| CRB3        | CRB3    | 26.04195472 | 26.41008574 | 94.78011158 |
| 91.21068825 |         |             |             |             |
| SNORD85     | SNORD85 | 1.041678189 | 0.880336191 | 3.345180409 |
| 2.942280266 |         |             |             |             |
| INPP5D      | INPP5D  | 11448.04329 | 13440.97297 | 6830.858395 |
| 7004.588553 |         |             |             |             |
| ING1        | ING1    | 1169.804606 | 1507.13556  | 1375.984208 |
| 1235.757712 |         |             |             |             |
| LY96        | LY96    | 207.2939596 | 511.4753272 | 414.8023707 |
| 306.9779078 |         |             |             |             |
| ZBTB4       | ZBTB4   | 376.0458261 | 1044.959059 | 1863.265488 |
| 1190.642748 |         |             |             |             |
| MRPL4       | MRPL4   | 5738.605142 | 4299.561959 | 4191.511052 |
| 4719.417547 |         |             |             |             |
| GDI2        | GDI2    | 30112.83308 | 22976.7746  | 23573.48634 |
| 22672.23097 |         |             |             |             |
| CD300LD     | CD300LD | 2.083356377 | 0           | 7.805420954 |
| 0           |         |             |             | 0           |
| PTCHD4      | PTCHD4  | 0           | 0           | 6.690360818 |
| 0           |         |             |             | 0           |
| ITM2C       | ITM2C   | 4983.388455 | 5407.024888 | 2406.299774 |
| 1690.830393 |         |             |             |             |
| PPFIA2      | PPFIA2  | 0           | 0           | 2.942280266 |
| 0           |         |             |             |             |
| BCL2L12     | BCL2L12 | 2443.777031 | 2510.718818 | 1459.613718 |
| 1863.444168 |         |             |             |             |
| RGS11       | RGS11   | 0           | 1.760672383 | 0           |
| 0           |         |             |             | 5.884560532 |
| NOTCH3      | NOTCH3  | 0           | 0           | 3.345180409 |
| 0           |         |             |             | 0           |
| LAIR2       | LAIR2   | 1437.5159   | 1007.984939 | 483.9360991 |
| 560.9947707 |         |             |             |             |
| CCL4L2      | CCL4L2  | 1.041678189 | 12.32470668 | 11.15060136 |
| 9.807600887 |         |             |             |             |
| DRD1        | DRD1    | 0           | 5.282017149 | 0           |
| 0           |         |             |             | 0           |
| TMPRSS2     | TMPRSS2 | 0           | 23.76907717 | 2.230120273 |
| 0           |         |             |             | 0.980760089 |
| TOMM22      | TOMM22  | 8128.214906 | 5753.877347 | 6596.695766 |
| 5622.697588 |         |             |             |             |
| RNPEP       | RNPEP   | 4233.380159 | 3884.043277 | 2863.47443  |
| 3662.158171 |         |             |             |             |
| AP4B1       | AP4B1   | 3259.411052 | 3197.381047 | 2550.142532 |
| 3068.798317 |         |             |             |             |
| RIF1        | RIF1    | 6022.983287 | 5944.910301 | 7987.175756 |
| 7230.163374 |         |             |             |             |
| CEBPB       | CEBPB   | 704.1744556 | 1046.719732 | 1362.603487 |
| 982.7216088 |         |             |             |             |
| CDKN3       | CDKN3   | 5750.063602 | 5975.722067 | 2814.411784 |
| 3979.92444  |         |             |             |             |
| CD80        | CD80    | 1217.721803 | 249.1351422 | 685.7619838 |
| 339.3429907 |         |             |             |             |
| NCF2        | NCF2    | 1419.807371 | 588.0645759 | 662.3457209 |

|              |              |             |             |             |             |
|--------------|--------------|-------------|-------------|-------------|-------------|
| 382.4964346  |              |             |             |             |             |
| KCNK12       | KCNK12       | 42.70880574 | 36.97412004 | 12.2656615  |             |
| 21.57672195  |              |             |             |             |             |
| C2orf43      | C2orf43      | 2751.072096 | 2420.04419  | 1885.56669  |             |
| 2200.825639  |              |             |             |             |             |
| STAG3        | STAG3        | 242.711018  | 760.6104694 | 518.5029634 |             |
| 685.551302   |              |             |             |             |             |
| LRRC27       | LRRC27       | 188.5437522 | 86.27294676 | 172.8343211 |             |
| 115.7296905  |              |             |             |             |             |
| SCG5         | SCG5         | 55.208944   | 59.86286102 | 14.49578177 |             |
| 29.42280266  |              |             |             |             |             |
| TC2N         | TC2N         | 4957.3465   | 7170.338279 | 4252.83936  |             |
| 3978.94368   |              |             |             |             |             |
| LPAR5        | LPAR5        | 623.965235  | 467.4585177 | 374.6602058 |             |
| 702.2242235  |              |             |             |             |             |
| C2orf72      | C2orf72      | 4.166712755 | 6.16235334  | 0           | 4.903800443 |
| DGCR2        | DGCR2        | 4219.838342 | 4274.032209 | 5679.001274 |             |
| 4762.570991  |              |             |             |             |             |
| WDR25        | WDR25        | 1044.803223 | 605.6712997 | 902.0836502 |             |
| 619.840376   |              |             |             |             |             |
| SLC12A8      | SLC12A8      | 29.16698928 | 71.30723151 | 47.94758586 |             |
| 44.13420399  |              |             |             |             |             |
| ZNF621       | ZNF621       | 386.462608  | 933.1563629 | 507.352362  |             |
| 555.1102102  |              |             |             |             |             |
| FAM71F1      | FAM71F1      | 4.166712755 | 0           | 5.575300681 | 1.961520177 |
| SEC14L3      | SEC14L3      | 0           | 0           | 4.903800443 |             |
| TRAK1        | TRAK1        | 1154.179433 | 1962.269371 | 1147.39688  |             |
| 1443.678851  |              |             |             |             |             |
| IFIT1B       | IFIT1B       | 9.375103698 | 2.641008574 | 122.656615  |             |
| 1.961520177  |              |             |             |             |             |
| DEPDC5       | DEPDC5       | 1430.224153 | 1934.978949 | 1514.251665 |             |
| 1611.388826  |              |             |             |             |             |
| SMAGP        | SMAGP        | 228.1275233 | 198.9559793 | 464.9800768 |             |
| 306.9779078  |              |             |             |             |             |
| PTTG1IP      | PTTG1IP      | 6828.200527 | 5257.367735 | 5106.975424 |             |
| 5036.203055  |              |             |             |             |             |
| HMG3         | HMG3         | 3884.417966 | 3678.924944 | 2824.447325 |             |
| 2854.011858  |              |             |             |             |             |
| LOC103344931 | LOC103344931 |             | 26.04195472 | 24.64941336 |             |
| 37.91204463  |              | 11.76912106 |             |             |             |
| ELN          | ELN          | 0           | 1.760672383 | 0           | 0           |
| HDGF         | HDGF         | 10189.69604 | 9585.980789 | 6340.231935 |             |
| 7389.046508  |              |             |             |             |             |
| PAN2         | PAN2         | 1137.512582 | 1776.518434 | 1632.448039 |             |
| 1563.331581  |              |             |             |             |             |
| BBC3         | BBC3         | 197.9188559 | 211.2806859 | 921.0396726 |             |
| 220.67102    |              |             |             |             |             |
| SPECC1L      | SPECC1L      | 1060.428396 | 1508.896232 | 1346.992645 |             |
| 1024.894293  |              |             |             |             |             |
| CYP27B1      | CYP27B1      | 233.3359143 | 331.8867442 | 284.3403347 |             |

|             |             |             |             |             |             |
|-------------|-------------|-------------|-------------|-------------|-------------|
| 539.4180488 |             |             |             |             |             |
| HPX         | HPX         | 3.125034566 | 2.641008574 | 0           | 4.903800443 |
| SLC12A2     | SLC12A2     | 2089.606447 | 2832.041528 | 2039.444989 |             |
| 1859.521128 |             |             |             |             |             |
| CD59        | CD59        | 12013.67455 | 8607.92728  | 6704.856599 |             |
| 5747.25412  |             |             |             |             |             |
| CYP27A1     | CYP27A1     | 0           | 2.641008574 | 0           | 0.980760089 |
| CXCL12      | CXCL12      | 0           | 0           | 4.903800443 |             |
| PTPRJ       | PTPRJ       | 2569.820092 | 5300.504209 | 1805.282361 |             |
| 2064.499987 |             |             |             |             |             |
| ZNF219      | ZNF219      | 82.29257691 | 96.83698106 | 200.7108245 |             |
| 147.1140133 |             |             |             |             |             |
| SH2D3C      | SH2D3C      | 4591.717456 | 5741.552641 | 2718.516612 |             |
| 4333.978832 |             |             |             |             |             |
| RTP1        | RTP1        | 0           | 0           | 1.961520177 |             |
| AAED1       | AAED1       | 709.3828465 | 774.6958485 | 916.579432  |             |
| 738.5123468 |             |             |             |             |             |
| SNX18       | SNX18       | 322.9202385 | 853.0457695 | 217.4367266 |             |
| 166.7292151 |             |             |             |             |             |
| DHX16       | DHX16       | 1.041678189 | 205.1183326 | 1.115060136 |             |
| 237.3439415 |             |             |             |             |             |
| ANXA9       | ANXA9       | 16.66685102 | 44.01680957 | 34.56686422 |             |
| 23.53824213 |             |             |             |             |             |
| EDIL3       | EDIL3       | 0           | 0           | 3.345180409 | 0           |
| IFI16       | IFI16       | 16596.0169  | 15386.51595 | 18187.74588 |             |
| 14527.99919 |             |             |             |             |             |
| LRR32       | LRR32       | 872.9263221 | 152.2981611 | 834.0649819 |             |
| 681.6282616 |             |             |             |             |             |
| GINS3       | GINS3       | 1603.142732 | 1555.55405  | 1179.733624 |             |
| 1354.429682 |             |             |             |             |             |
| SCLY        | SCLY        | 3875.042862 | 3520.46443  | 2790.995521 |             |
| 3252.200454 |             |             |             |             |             |
| FAM160B2    | FAM160B2    |             | 1226.055228 | 1638.305652 |             |
| 1547.703469 | 2498.976706 |             |             |             |             |
| FN3K        | FN3K        | 2.083356377 | 2.641008574 | 1.115060136 |             |
| 13.73064124 |             |             |             |             |             |
| SAV1        | SAV1        | 808.3422744 | 581.0218863 | 1499.755883 |             |
| 1374.044884 |             |             |             |             |             |
| FAM186B     | FAM186B     | 9.375103698 | 8.803361914 | 11.15060136 |             |
| 4.903800443 |             |             |             |             |             |
| MYCBPAP     | MYCBPAP     | 115.6262789 | 173.4262297 | 33.45180409 |             |
| 104.9413295 |             |             |             |             |             |
| SPATA9      | SPATA9      | 232.2942361 | 214.8020307 | 181.7548022 |             |
| 318.7470288 |             |             |             |             |             |
| LRR8E       | LRR8E       | 1.041678189 | 0.880336191 | 41.25722504 |             |
| 1.961520177 |             |             |             |             |             |
| CNOT11      | CNOT11      | 8100.089595 | 6847.254897 | 6785.140929 |             |
| 7071.280239 |             |             |             |             |             |
| ZNF223      | ZNF223      | 6.250069132 | 12.32470668 | 255.3487712 |             |
| 126.5180514 |             |             |             |             |             |

|             |           |             |             |             |
|-------------|-----------|-------------|-------------|-------------|
| POGK        | POGK      | 4354.214829 | 3877.000587 | 4407.832719 |
| 4964.607569 |           |             |             |             |
| PKN3        | PKN3      | 681.2575354 | 709.5509703 | 347.8987625 |
| 608.071255  |           |             |             |             |
| ASAP2       | ASAP2     | 8.33342551  | 13.20504287 | 5.575300681 |
| 22.55748204 |           |             |             |             |
| PROM1       | PROM1     | 1.041678189 | 0           | 17.84096218 |
| LOC375196   | LOC375196 |             | 13.54181645 | 18.48706002 |
| 24.531323   |           | 36.28812328 |             |             |
| WASH5P      | WASH5P    | 3.125034566 | 2.641008574 | 0           |
| DALRD3      | DALRD3    | 2526.069608 | 2464.061    | 2439.751578 |
| 2716.705446 |           |             |             |             |
| ACOT9       | ACOT9     | 3693.790857 | 2685.025384 | 2387.343752 |
| 2956.010907 |           |             |             |             |
| CHD2        | CHD2      | 4588.592421 | 3708.856375 | 9337.513581 |
| 5420.66101  |           |             |             |             |
| HENMT1      | HENMT1    | 2453.152134 | 2420.924526 | 2290.33352  |
| 2187.094998 |           |             |             |             |
| NREP        | NREP      | 171.8769011 | 1010.625948 | 171.719261  |
| 529.6104479 |           |             |             |             |
| SCN2A       | SCN2A     | 1.041678189 | 2.641008574 | 0           |
| CALCA       | CALCA     | 0           | 0           | 4.903800443 |
| PSMD14      | PSMD14    | 17722.07102 | 11940.8801  | 10126.97616 |
| 10902.12915 |           |             |             |             |
| EIF3E       | EIF3E     | 10353.23952 | 8556.867781 | 10162.65808 |
| 10002.77214 |           |             |             |             |
| USP47       | USP47     | 8987.599412 | 7959.999843 | 10347.75806 |
| 8969.051011 |           |             |             |             |
| PAQR5       | PAQR5     | 3.125034566 | 6.16235334  | 0           |
| CXCL10      | CXCL10    | 1028.136372 | 2511.599154 | 6356.957837 |
| 1980.154619 |           |             |             |             |
| SH3GLB1     | SH3GLB1   | 5820.897718 | 5014.394946 | 5739.214521 |
| 5078.375739 |           |             |             |             |
| C1orf106    | C1orf106  |             | 40.62544936 | 2.641008574 |
| 23.41626286 |           | 2.942280266 |             |             |
| ASH1L       | ASH1L     | 2483.360802 | 2392.753768 | 4048.783355 |
| 2922.665064 |           |             |             |             |
| SMCP        | SMCP      | 0           | 0           | 0.980760089 |
| TAP2        | TAP2      | 555.2144746 | 17.60672383 | 635.5842777 |
| 19.61520177 |           |             |             |             |
| CASP6       | CASP6     | 2686.488049 | 2835.562873 | 1649.173942 |
| 1860.501888 |           |             |             |             |
| CASP4       | CASP4     | 3418.787815 | 2962.331284 | 3928.35686  |
| 2869.704019 |           |             |             |             |
| CASP1       | CASP1     | 2709.404969 | 1546.750688 | 3746.602058 |
| 2472.496184 |           |             |             |             |
| GNAT2       | GNAT2     | 23.95859834 | 29.93143051 | 49.062646   |
| 28.44204257 |           |             |             |             |
| MRPL50      | MRPL50    | 2788.572511 | 2472.864362 | 3148.929825 |
| 2803.012333 |           |             |             |             |



|             |         |             |             |             |   |
|-------------|---------|-------------|-------------|-------------|---|
| UTS2R       | UTS2R   | 1.041678189 | 10.5640343  | 0           | 0 |
| SNX9        | SNX9    | 5302.14198  | 6273.2757   | 6680.325276 |   |
| 9157.356948 |         |             |             |             |   |
| PACSIN3     | PACSIN3 | 169.7935448 | 143.4947992 | 173.9493813 |   |
| 146.1332532 |         |             |             |             |   |
| UBXN1       | UBXN1   | 3730.249594 | 3553.036869 | 3633.980984 |   |
| 3467.967674 |         |             |             |             |   |
| IL17RA      | IL17RA  | 2325.025717 | 3543.353171 | 4193.741172 |   |
| 3733.753658 |         |             |             |             |   |
| HSD17B8     | HSD17B8 | 1.041678189 | 0           | 12.2656615  | 0 |
| RNF14       | RNF14   | 3325.036778 | 2614.598489 | 3228.099094 |   |
| 3473.852234 |         |             |             |             |   |
| PKIB        | PKIB    | 21.87524196 | 13.20504287 | 14.49578177 |   |
| 23.53824213 |         |             |             |             |   |
| ZNF410      | ZNF410  | 8666.76253  | 6302.326795 | 7856.71372  |   |
| 7370.412066 |         |             |             |             |   |
| EML5        | EML5    | 67.70908227 | 161.9818592 | 152.7632387 |   |
| 218.7094998 |         |             |             |             |   |
| EIF3L       | EIF3L   | 11943.88211 | 10149.39595 | 11779.49528 |   |
| 11067.8776  |         |             |             |             |   |
| CCDC82      | CCDC82  | 2746.905384 | 2740.486564 | 2603.665418 |   |
| 3108.028721 |         |             |             |             |   |
| ACBD4       | ACBD4   | 366.6707224 | 470.0995262 | 342.3234618 |   |
| 554.1294501 |         |             |             |             |   |
| COL11A2     | COL11A2 | 0           | 0.880336191 | 1.115060136 | 0 |
| CAMK2B      | CAMK2B  | 6.250069132 | 15.84605145 | 42.37228518 |   |
| 65.71092594 |         |             |             |             |   |
| LMNB1       | LMNB1   | 3526.080669 | 8838.575362 | 1869.955849 |   |
| 2881.473141 |         |             |             |             |   |
| CDH18       | CDH18   | 0           | 0           | 1.115060136 | 0 |
| OMD         | OMD     | 39.58377117 | 44.89714576 | 21.18614259 |   |
| 19.61520177 |         |             |             |             |   |
| OXSRI       | OXSRI   | 4536.508512 | 5302.264881 | 3562.617135 |   |
| 4352.613274 |         |             |             |             |   |
| NRD1        | NRD1    | 13869.94508 | 12280.68987 | 10641.01888 |   |
| 10712.84245 |         |             |             |             |   |
| B4GALT5     | B4GALT5 | 356.2539405 | 1126.830325 | 355.7041835 |   |
| 419.765318  |         |             |             |             |   |
| MSH5        | MSH5    | 33.33370204 | 25.52974955 | 11.15060136 |   |
| 28.44204257 |         |             |             |             |   |
| USB1        | USB1    | 7117.787063 | 5458.964723 | 4487.001988 |   |
| 5328.469562 |         |             |             |             |   |
| SNORD25     | SNORD25 | 44.79216211 | 14.96571525 | 54.63794668 |   |
| 44.13420399 |         |             |             |             |   |
| SNORD26     | SNORD26 | 44.79216211 | 20.2477324  | 43.48734531 |   |
| 23.53824213 |         |             |             |             |   |
| SNORD27     | SNORD27 | 31.25034566 | 26.41008574 | 36.7969845  |   |
| 39.23040355 |         |             |             |             |   |
| SNORD28     | SNORD28 | 10.41678189 | 21.12806859 | 30.10662368 |   |
| 39.23040355 |         |             |             |             |   |

|             |             |             |             |             |
|-------------|-------------|-------------|-------------|-------------|
| SNORD30     | SNORD30     | 25.00027653 | 8.803361914 | 30.10662368 |
| 23.53824213 |             |             |             |             |
| SNORD31     | SNORD31     | 37.50041479 | 27.29042193 | 26.76144327 |
| 54.92256497 |             |             |             |             |
| CPZ         | CPZ         | 2.083356377 | 0           | 0           |
| MGEA5       | MGEA5       | 6462.571483 | 10152.9173  | 9137.917817 |
| 8296.24959  |             |             |             |             |
| MS4A6A      | MS4A6A      | 1.041678189 | 5.282017149 | 0           |
| GPAM        | GPAM        | 935.4270135 | 1005.343931 | 10.78836098 |
| 830.7037951 |             |             |             | 1159.662542 |
| GPR161      | GPR161      | 53.12558762 | 43.13647338 | 140.4975772 |
| 113.7681703 |             |             |             |             |
| C1orf85     | C1orf85     | 1680.226918 | 1240.393694 | 621.0884959 |
| 973.894768  |             |             |             |             |
| NOC4L       | NOC4L       | 3506.288783 | 2528.325542 | 2545.682291 |
| 2759.85889  |             |             |             |             |
| MTX1        | MTX1        | 3176.076797 | 2427.08688  | 1951.355238 |
| 2086.076709 |             |             |             |             |
| SNORA38     | SNORA38     | 1.041678189 | 0           | 0           |
| SNORD10     | SNORD10     | 57.29230038 | 50.17916291 | 118.1963744 |
| 98.07600887 |             |             |             |             |
| DICER1-AS1  | DICER1-AS1  |             | 32.29202385 | 45.77748195 |
| 59.09818722 | 48.05724434 |             |             |             |
| SLC7A5P1    | SLC7A5P1    |             | 130.2097736 | 131.1700925 |
| 304.4114172 | 242.2477419 |             |             |             |
| SNORD37     | SNORD37     | 9.375103698 | 11.44437049 | 4.460240545 |
| 6.865320621 |             |             |             |             |
| SNORD96A    | SNORD96A    |             | 70.83411683 | 68.66622293 |
| 112.6210738 | 81.40308736 |             |             |             |
| SGCD        | SGCD        | 1.041678189 | 4.401680957 | 3.345180409 |
| 7.846080709 |             |             |             |             |
| SCNN1B      | SCNN1B      | 0           | 1.760672383 | 0           |
| CR2         | CR2         | 5.208390943 | 0.880336191 | 2.942280266 |
| 33.34584301 |             |             |             | 92.54999131 |
| TNIP2       | TNIP2       | 7334.456127 | 6806.759432 | 5228.516979 |
| 7371.392826 |             |             |             |             |
| GLA         | GLA         | 2607.320506 | 1877.757096 | 1542.128168 |
| 1276.949635 |             |             |             |             |
| MPO         | MPO         | 121.8763481 | 258.8188403 | 8.92048109  |
| 48.05724434 |             |             |             |             |
| GK          | GK          | 8766.763636 | 5748.59533  | 3486.793046 |
| 6214.095922 |             |             |             |             |
| ATP8B5P     | ATP8B5P     | 1.041678189 | 3.521344766 | 2.230120273 |
| 0.980760089 |             |             |             |             |
| KLHDC4      | KLHDC4      | 2110.44001  | 1075.770826 | 1451.808297 |
| 915.0491627 |             |             |             |             |
| ZNF775      | ZNF775      | 464.5884722 | 592.4662568 | 417.032491  |
| 439.3805197 |             |             |             |             |
| RIMKLA      | RIMKLA      | 98.95942793 | 102.9993344 | 78.05420954 |
| 210.8634191 |             |             |             |             |

|            |            |             |             |             |             |
|------------|------------|-------------|-------------|-------------|-------------|
| ALDH1A2    | ALDH1A2    | 0           | 1.760672383 | 0           | 0           |
| TYR03      | TYR03      | 47.91719668 | 95.95664487 | 30.10662368 |             |
|            |            | 105.9220896 |             |             |             |
| MIR198     | MIR198     | 2.083356377 | 0           | 0           | 0           |
| RAD9B      | RAD9B      | 96.87607155 | 85.39261057 | 152.7632387 |             |
|            |            | 127.4988115 |             |             |             |
| TBCK       | TBCK       | 2122.940149 | 2466.702008 | 1702.696828 |             |
|            |            | 2955.030147 |             |             |             |
| KLHDC9     | KLHDC9     | 22.91692015 | 77.46958485 | 26.76144327 |             |
|            |            | 54.92256497 |             |             |             |
| DLG1       | DLG1       | 1952.104926 | 2875.178001 | 2168.791965 |             |
|            |            | 2609.802596 |             |             |             |
| RCBTB2     | RCBTB2     | 2300.025441 | 916.4299753 | 1643.598641 |             |
|            |            | 425.6498785 |             |             |             |
| SORBS1     | SORBS1     | 42.70880574 | 88.03361914 | 36.7969845  |             |
|            |            | 139.2679326 |             |             |             |
| LRRC23     | LRRC23     | 88.54264604 | 196.3149707 | 140.4975772 |             |
|            |            | 317.7662687 |             |             |             |
| SLC6A9     | SLC6A9     | 41.66712755 | 74.82857627 | 333.4029807 |             |
|            |            | 88.26840798 |             |             |             |
| FANCB      | FANCB      | 768.7585033 | 772.9351761 | 624.4336763 |             |
|            |            | 753.2237481 |             |             |             |
| MS4A1      | MS4A1      | 0           | 10.5640343  | 33.45180409 | 31.38432284 |
| TRIM52-AS1 | TRIM52-AS1 |             | 230.2108797 | 358.2968299 |             |
|            |            | 371.3150254 | 285.4011858 |             |             |
| KIF25-AS1  | KIF25-AS1  |             | 0           | 0           | 1.115060136 |
|            |            | 0           | 0           | 0           | 0           |
| LOC727751  | LOC727751  |             | 2.083356377 | 0.880336191 |             |
|            |            | 3.345180409 | 0.980760089 |             |             |
| CPED1      | CPED1      | 15.62517283 | 23.76907717 | 0           | 6.865320621 |
| C1orf204   | C1orf204   |             | 47.91719668 | 12.32470668 |             |
|            |            | 80.28432981 | 50.99952461 |             |             |
| LDB1       | LDB1       | 2619.820645 | 2711.43547  | 2814.411784 |             |
|            |            | 3004.068152 |             |             |             |
| FAM135A    | FAM135A    | 505.2139215 | 456.0141472 | 752.665592  |             |
|            |            | 511.9567663 |             |             |             |
| GRB10      | GRB10      | 136.4598427 | 314.2800203 | 303.2963571 |             |
|            |            | 180.4598563 |             |             |             |
| KIAA1462   | KIAA1462   |             | 2.083356377 | 21.12806859 | 0           |
|            |            | 8.826840798 |             |             |             |
| SLC10A3    | SLC10A3    | 3056.283806 | 1998.363155 | 3196.877411 |             |
|            |            | 2791.243212 |             |             |             |
| AICDA      | AICDA      | 0           | 48.41849053 | 6.690360818 | 0           |
| COL6A3     | COL6A3     | 104.1678189 | 2059.106352 | 459.4047761 |             |
|            |            | 2210.63324  |             |             |             |
| TAB1       | TAB1       | 189.5854303 | 459.5354919 | 162.7987799 |             |
|            |            | 211.8441792 |             |             |             |
| CECR1      | CECR1      | 504.1722433 | 912.9086305 | 1808.627541 |             |
|            |            | 848.3574767 |             |             |             |
| GYPE       | GYPE       | 4.166712755 | 97.71731725 | 0           | 107.8836098 |
| HKDC1      | HKDC1      | 134.3764863 | 66.02521436 | 50.17770613 |             |

|              |              |             |             |             |   |
|--------------|--------------|-------------|-------------|-------------|---|
| 42.17268381  |              |             |             |             |   |
| C9orf72      | C9orf72      | 550.0060836 | 404.0743119 | 889.8179887 |   |
| 818.934674   |              |             |             |             |   |
| MIXL1        | MIXL1        | 1.041678189 | 1.760672383 | 13.38072164 | 0 |
| CDC42SE1     | CDC42SE1     |             | 5567.769919 | 5689.612805 |   |
| 3416.544258  |              | 3201.200929 |             |             |   |
| INCENP       | INCENP       | 219.7940978 | 653.209454  | 138.2674569 |   |
| 213.8056993  |              |             |             |             |   |
| RNF149       | RNF149       | 10112.61186 | 9335.96531  | 8951.702774 |   |
| 6512.246989  |              |             |             |             |   |
| PEX5L        | PEX5L        | 14.58349464 | 23.76907717 | 17.84096218 |   |
| 10.78836098  |              |             |             |             |   |
| SCML1        | SCML1        | 14.58349464 | 21.12806859 | 670.1511419 |   |
| 349.1505916  |              |             |             |             |   |
| VEGFA        | VEGFA        | 127.084739  | 292.2716156 | 228.5873279 |   |
| 378.5733942  |              |             |             |             |   |
| FM05         | FM05         | 15.62517283 | 28.17075813 | 24.531323   |   |
| 23.53824213  |              |             |             |             |   |
| PTMS         | PTMS         | 415.6295973 | 1383.008157 | 234.1626286 |   |
| 502.1491654  |              |             |             |             |   |
| RRAGD        | RRAGD        | 45.8338403  | 315.1603565 | 595.4421128 |   |
| 615.9173357  |              |             |             |             |   |
| BBS7         | BBS7         | 1448.97436  | 1198.137557 | 981.2529199 |   |
| 1108.2589    |              |             |             |             |   |
| RBM41        | RBM41        | 1132.304191 | 939.3187163 | 1000.208942 |   |
| 855.2227973  |              |             |             |             |   |
| STARD3       | STARD3       | 3106.284359 | 2372.506036 | 2479.893743 |   |
| 2551.937751  |              |             |             |             |   |
| LOC101060553 | LOC101060553 |             | 14.58349464 | 16.72638764 | 0 |
| 9.807600887  |              |             |             |             |   |
| FUZ          | FUZ          | 182.293683  | 409.356329  | 229.7023881 |   |
| 288.3434661  |              |             |             |             |   |
| GSR          | GSR          | 6670.90712  | 3671.882254 | 6368.108438 |   |
| 5093.08714   |              |             |             |             |   |
| E2F7         | E2F7         | 1107.303915 | 936.6777077 | 543.0342864 |   |
| 377.5926341  |              |             |             |             |   |
| STMN1        | STMN1        | 53612.05134 | 59218.45493 | 28072.75399 |   |
| 44308.77929  |              |             |             |             |   |
| TMEM106B     | TMEM106B     |             | 2347.942637 | 2368.984691 |   |
| 3887.099635  |              | 3395.391427 |             |             |   |
| RPS10        | RPS10        | 13981.40465 | 12058.84515 | 14955.18655 |   |
| 11891.71608  |              |             |             |             |   |
| SNUPN        | SNUPN        | 3368.787262 | 2551.214283 | 2780.95998  |   |
| 3250.238934  |              |             |             |             |   |
| INADL        | INADL        | 393.7543553 | 606.5516359 | 1023.625205 |   |
| 1753.599039  |              |             |             |             |   |
| SUGT1P1      | SUGT1P1      | 7.291747321 | 57.22185244 | 1.115060136 |   |
| 20.59596186  |              |             |             |             |   |
| USP10        | USP10        | 14117.86449 | 11248.05552 | 13164.39997 |   |
| 12882.28376  |              |             |             |             |   |

|             |             |             |             |               |
|-------------|-------------|-------------|-------------|---------------|
| SCARNA2     | SCARNA2     | 10.41678189 | 9.683698106 | 31.22168382   |
| 17.6536816  |             |             |             |               |
| SNORA13     | SNORA13     | 8.33342551  | 8.803361914 | 0 13.73064124 |
| SNORA75     | SNORA75     | 31.25034566 | 34.33311147 | 22.30120273   |
| 31.38432284 |             |             |             |               |
| NUMB        | NUMB        | 4790.67799  | 4145.503125 | 4328.663449   |
| 4691.956264 |             |             |             |               |
| SYTL2       | SYTL2       | 2037.522537 | 3431.550474 | 1013.589664   |
| 1756.541319 |             |             |             |               |
| RPL23AP64   | RPL23AP64   |             | 10.41678189 | 8.803361914   |
| 17.84096218 | 26.48052239 |             |             |               |
| SNORD6      | SNORD6      | 1.041678189 | 3.521344766 | 0 5.884560532 |
| TOB2P1      | TOB2P1      | 5.208390943 | 3.521344766 | 0 2.942280266 |
| SNORA16A    | SNORA16A    |             | 7.291747321 | 7.042689532   |
| 2.230120273 | 22.55748204 |             |             |               |
| RRP7B       | RRP7B       | 555.2144746 | 797.5845894 | 783.8872758   |
| 1165.142985 |             |             |             |               |
| ASAH1       | ASAH1       | 2178.149093 | 1462.238414 | 2710.711191   |
| 1719.272435 |             |             |             |               |
| STX4        | STX4        | 733.3414448 | 1081.052843 | 973.447499    |
| 946.4334856 |             |             |             |               |
| ATP7A       | ATP7A       | 966.6773591 | 1287.931848 | 1536.552868   |
| 1186.719707 |             |             |             |               |
| CRTC3       | CRTC3       | 2821.906213 | 4528.449369 | 3947.312882   |
| 3159.028246 |             |             |             |               |
| CYP2C9      | CYP2C9      | 1.041678189 | 0 0         | 3.923040355   |
| NDUFB6      | NDUFB6      | 4230.255124 | 4809.276614 | 3590.493639   |
| 4105.461731 |             |             |             |               |
| RALGPS1     | RALGPS1     | 72.91747321 | 95.07630868 | 59.09818722   |
| 162.8061747 |             |             |             |               |
| NDUFS1      | NDUFS1      | 9114.684151 | 7209.073072 | 7105.163188   |
| 6479.881906 |             |             |             |               |
| ZNF275      | ZNF275      | 1200.013273 | 1377.72614  | 1332.496863   |
| 1121.008781 |             |             |             |               |
| SWI5        | SWI5        | 805.2172399 | 726.2773579 | 622.203556    |
| 675.7437011 |             |             |             |               |
| GLRA3       | GLRA3       | 0 0         | 1.115060136 | 0             |
| ADAM12      | ADAM12      | 86.45928966 | 780.8582018 | 51.29276627   |
| 625.7249366 |             |             |             |               |
| TRIP10      | TRIP10      | 913.5517715 | 756.2087884 | 1257.787834   |
| 1301.468638 |             |             |             |               |
| IFI27       | IFI27       | 1110.428949 | 364.4591833 | 401.4216491   |
| 532.5527281 |             |             |             |               |
| HELLS       | HELLS       | 3462.538299 | 3648.993514 | 2038.329929   |
| 2639.225399 |             |             |             |               |
| FAM220A     | FAM220A     | 130.2097736 | 273.7845555 | 199.5957644   |
| 153.9793339 |             |             |             |               |
| NF2         | NF2         | 5441.726858 | 7422.11443  | 3991.915288   |
| 4867.51232  |             |             |             |               |
| ZNF146      | ZNF146      | 8332.383831 | 6444.941258 | 10972.19174   |

|             |           |             |             |             |
|-------------|-----------|-------------|-------------|-------------|
| 7840.196149 |           |             |             |             |
| MTFR1L      | MTFR1L    | 3045.867024 | 2327.60889  | 2768.694318 |
| 2780.454851 |           |             |             |             |
| ACACA       | ACACA     | 673.9657881 | 2425.326207 | 936.6505145 |
| 1644.734669 |           |             |             |             |
| FBRSL1      | FBRSL1    | 117.7096353 | 305.4766584 | 170.6042008 |
| 218.7094998 |           |             |             |             |
| KHK         | KHK       | 1160.429502 | 752.6874437 | 976.7926794 |
| 747.3391876 |           |             |             |             |
| CENPW       | CENPW     | 2710.446647 | 3148.082221 | 1669.245024 |
| 1855.598088 |           |             |             |             |
| HAGH        | HAGH      | 2808.364397 | 2141.857954 | 2284.758219 |
| 2293.997847 |           |             |             |             |
| FBX018      | FBX018    | 5981.31616  | 5282.017149 | 6586.660225 |
| 6143.481195 |           |             |             |             |
| ARPP21      | ARPP21    | 0           | 0.880336191 | 0           |
| MBD1        | MBD1      | 4612.55102  | 4152.545815 | 4607.428483 |
| 4355.555554 |           |             |             |             |
| PDCD2       | PDCD2     | 8400.092914 | 5571.647756 | 7428.530628 |
| 6380.825137 |           |             |             |             |
| PI4KA       | PI4KA     | 4479.216211 | 7681.813606 | 5174.994092 |
| 5540.313741 |           |             |             |             |
| PRB2        | PRB2      | 0           | 0           | 1.961520177 |
| ARHGAP23    | ARHGAP23  |             | 7.291747321 | 45.77748195 |
| 72.47890886 |           | 48.05724434 |             |             |
| SPON2       | SPON2     | 11.45846008 | 22.88874098 | 23.41626286 |
| 11.76912106 |           |             |             |             |
| C7orf43     | C7orf43   | 137.5015209 | 450.73213   | 196.250584  |
| 226.5555805 |           |             |             |             |
| STAT2       | STAT2     | 8286.549991 | 6849.015569 | 13653.91137 |
| 8575.766215 |           |             |             |             |
| ST5         | ST5       | 16.66685102 | 13.20504287 | 12.2656615  |
| 8.826840798 |           |             |             |             |
| MTHFD1L     | MTHFD1L   | 4517.758304 | 3559.199222 | 3926.12674  |
| 4193.730139 |           |             |             |             |
| COMT        | COMT      | 4988.596846 | 3680.685616 | 3301.693063 |
| 3575.851283 |           |             |             |             |
| COMMD2      | COMMD2    | 2529.194642 | 2339.933597 | 2596.975057 |
| 2636.283118 |           |             |             |             |
| ATPIF1      | ATPIF1    | 8579.261562 | 8946.856714 | 6945.709589 |
| 7237.028694 |           |             |             |             |
| MIR3973     | MIR3973   | 0           | 0           | 2.942280266 |
| MIR548AN    | MIR548AN  |             | 0           | 8.92048109  |
| 0.980760089 |           |             |             |             |
| MIR4534     | MIR4534   | 0           | 0           | 1.115060136 |
| RAB11FIP2   | RAB11FIP2 |             | 389.5876426 | 411.9973376 |
| 719.2137879 |           | 652.205459  |             |             |
| ITSN2       | ITSN2     | 5404.226443 | 4833.045691 | 6817.477673 |
| 5131.336784 |           |             |             |             |
| STK38L      | STK38L    | 2811.489431 | 2950.886914 | 2319.325083 |

|             |          |             |             |             |             |
|-------------|----------|-------------|-------------|-------------|-------------|
| 2487.207585 |          |             |             |             |             |
| FAM3C       | FAM3C    | 3469.830047 | 3833.864114 | 2140.915462 |             |
| 2349.901172 |          |             |             |             |             |
| NSA2        | NSA2     | 3470.871725 | 2493.99243  | 2833.367806 |             |
| 2372.458654 |          |             |             |             |             |
| ANAPC10     | ANAPC10  | 2502.111009 | 2002.764836 | 2040.560049 |             |
| 2003.692861 |          |             |             |             |             |
| SFRP1       | SFRP1    | 0           | 7.042689532 | 0           | 0.980760089 |
| TMUB2       | TMUB2    | 1816.686761 | 1661.194393 | 2030.524508 |             |
| 1884.04013  |          |             |             |             |             |
| TDP1        | TDP1     | 7526.124913 | 6358.668311 | 5606.522365 |             |
| 6844.724659 |          |             |             |             |             |
| DDC         | DDC      | 11.45846008 | 15.84605145 | 10.03554123 |             |
| 11.76912106 |          |             |             |             |             |
| HIP1        | HIP1     | 283.3364673 | 463.0568367 | 236.3927489 |             |
| 195.1712576 |          |             |             |             |             |
| INPP5F      | INPP5F   | 1715.643977 | 1532.665309 | 1598.996235 |             |
| 1745.752958 |          |             |             |             |             |
| PCDHA5      | PCDHA5   | 0           | 0           | 0           | 0.980760089 |
| DNAH7       | DNAH7    | 5.208390943 | 4.401680957 | 7.805420954 | 0           |
| PRDM6       | PRDM6    | 0           | 0           | 3.345180409 | 0           |
| FGFR10P2    | FGFR10P2 |             | 4983.388455 | 4009.931352 |             |
| 6166.282554 |          | 3913.232754 |             |             |             |
| MCF2        | MCF2     | 0           | 1.760672383 | 0           | 0           |
| C6orf89     | C6orf89  | 6437.571206 | 5873.603069 | 5174.994092 |             |
| 5142.125145 |          |             |             |             |             |
| TBC1D4      | TBC1D4   | 4196.921422 | 3068.851963 | 5272.004324 |             |
| 6579.919435 |          |             |             |             |             |
| MAP3K7CL    | MAP3K7CL |             | 121.8763481 | 125.0077392 |             |
| 207.4011853 |          | 212.8249392 |             |             |             |
| STK24       | STK24    | 13578.27519 | 12351.11677 | 11833.01817 |             |
| 12019.21489 |          |             |             |             |             |
| NBL1        | NBL1     | 272.9196854 | 734.2003837 | 733.7095697 |             |
| 647.3016585 |          |             |             |             |             |
| POLE2       | POLE2    | 2839.614742 | 2606.675463 | 1527.632387 |             |
| 2006.635141 |          |             |             |             |             |
| ELF5        | ELF5     | 0           | 0.880336191 | 0           | 0           |
| ELF4        | ELF4     | 1279.180816 | 1917.372225 | 1772.945617 |             |
| 1319.122319 |          |             |             |             |             |
| ELAVL1      | ELAVL1   | 8879.26488  | 10783.23801 | 6997.002355 |             |
| 8147.174057 |          |             |             |             |             |
| HMGCL       | HMGCL    | 2050.022675 | 1690.245488 | 1910.098013 |             |
| 2012.519702 |          |             |             |             |             |
| NPAS3       | NPAS3    | 0           | 0           | 0           | 2.942280266 |
| RASSF8      | RASSF8   | 5.208390943 | 27.29042193 | 0           | 23.53824213 |
| PUM1        | PUM1     | 7577.167145 | 7712.625373 | 9266.149732 |             |
| 8959.24341  |          |             |             |             |             |
| BCL2L11     | BCL2L11  | 2175.024058 | 4117.332367 | 3788.974343 |             |
| 3587.620404 |          |             |             |             |             |
| TADA1       | TADA1    | 2306.27551  | 1955.226681 | 2758.658777 |             |

|              |              |             |             |             |             |
|--------------|--------------|-------------|-------------|-------------|-------------|
| 2446.996421  |              |             |             |             |             |
| CNTR0B       | CNTR0B       | 2869.82341  | 2432.368897 | 2147.605822 |             |
| 2487.207585  |              |             |             |             |             |
| CASZ1        | CASZ1        | 180.2103266 | 401.4333033 | 369.0849051 |             |
| 270.6897845  |              |             |             |             |             |
| C1orf35      | C1orf35      | 1237.513688 | 1013.266956 | 1284.549277 |             |
| 1246.546073  |              |             |             |             |             |
| PTK7         | PTK7         | 30.20866747 | 209.5200136 | 7.805420954 |             |
| 88.26840798  |              |             |             |             |             |
| TRAIP        | TRAIP        | 1596.892663 | 1560.836067 | 903.1987104 |             |
| 1208.296429  |              |             |             |             |             |
| SF3A1        | SF3A1        | 4234.421837 | 7862.282526 | 6026.900037 |             |
| 5028.356975  |              |             |             |             |             |
| SMNDC1       | SMNDC1       | 1767.727886 | 1795.885831 | 1823.123323 |             |
| 1545.6779    |              |             |             |             |             |
| SAP18        | SAP18        | 10525.11642 | 9019.044281 | 11325.6658  |             |
| 9302.509441  |              |             |             |             |             |
| FHL1         | FHL1         | 331.253664  | 380.3052347 | 854.1360644 |             |
| 976.8370483  |              |             |             |             |             |
| CELF6        | CELF6        | 0           | 45.71746559 | 28.44204257 |             |
| PARVB        | PARVB        | 400.0044245 | 1162.043773 | 366.8547848 |             |
| 447.2266004  |              |             |             |             |             |
| LLGL2        | LLGL2        | 636.4653733 | 663.7734883 | 677.9565628 |             |
| 1026.855813  |              |             |             |             |             |
| SYK          | SYK          | 8.33342551  | 138.2127821 | 0           | 104.9413295 |
| VAR2         | VAR2         | 0           | 58.98252483 | 0           | 53.94180488 |
| SRPX         | SRPX         | 0           | 0           | 4.903800443 |             |
| PALLD        | PALLD        | 194.7938213 | 1048.480404 | 127.1168555 |             |
| 611.0135352  |              |             |             |             |             |
| YY1AP1       | YY1AP1       | 5387.559592 | 4589.192566 | 4276.255623 |             |
| 3834.771947  |              |             |             |             |             |
| EIF4E3       | EIF4E3       | 5402.143087 | 5823.423906 | 6104.954246 |             |
| 5389.276687  |              |             |             |             |             |
| LOC100506787 | LOC100506787 |             | 1.041678189 | 0           | 0           |
| 1.961520177  |              |             |             |             |             |
| TMEM256      | TMEM256      | 1090.637064 | 1430.546311 | 854.1360644 |             |
| 942.5104452  |              |             |             |             |             |
| MEIOB        | MEIOB        | 20.83356377 | 5.282017149 | 6.690360818 |             |
| 10.78836098  |              |             |             |             |             |
| ZNF805       | ZNF805       | 332.2953422 | 360.0575023 | 948.916176  |             |
| 551.1871698  |              |             |             |             |             |
| EML4         | EML4         | 8617.803655 | 7508.387377 | 7067.251144 |             |
| 8208.961942  |              |             |             |             |             |
| CREBZF       | CREBZF       | 3646.915339 | 4599.7566   | 4246.148999 |             |
| 4650.76434   |              |             |             |             |             |
| LINS         | LINS         | 1710.435586 | 1455.195724 | 3326.224386 |             |
| 2295.959368  |              |             |             |             |             |
| MMP28        | MMP28        | 1.041678189 | 7.042689532 | 15.61084191 |             |
| 0.980760089  |              |             |             |             |             |
| MIR23B       | MIR23B       | 0           | 0           | 0           | 0.980760089 |



|             |            |             |             |             |             |
|-------------|------------|-------------|-------------|-------------|-------------|
| MIR15B      | MIR15B     | 2.083356377 | 6.16235334  | 3.345180409 |             |
| 2.942280266 |            |             |             |             |             |
| MIR941-3    | MIR941-3   | 0           | 2.641008574 | 0           |             |
| 0.980760089 |            |             |             |             |             |
| SRRT        | SRRT       | 12011.59119 | 10960.18558 | 8871.418444 |             |
| 9956.67642  |            |             |             |             |             |
| RTBDN       | RTBDN      | 0           | 0           | 1.115060136 | 0.980760089 |
| CDK20       | CDK20      | 42.70880574 | 38.73479242 | 201.8258847 |             |
| 164.7676949 |            |             |             |             |             |
| PCSK1       | PCSK1      | 1.041678189 | 0           | 0           | 1.961520177 |
| PAX3        | PAX3       | 0           | 0           | 2.230120273 | 0           |
| ADAM21P1    | ADAM21P1   | 0           | 0           | 2.230120273 | 0           |
| SF3B2       | SF3B2      | 9420.937539 | 11454.93452 | 10550.69901 |             |
| 9895.869295 |            |             |             |             |             |
| IMMT        | IMMT       | 15218.91834 | 13467.38306 | 13435.35958 |             |
| 14490.73031 |            |             |             |             |             |
| METAP2      | METAP2     | 4640.676331 | 4112.930686 | 4349.849592 |             |
| 4195.691659 |            |             |             |             |             |
| RAB32       | RAB32      | 21.87524196 | 434.8860786 | 24.531323   |             |
| 130.4410918 |            |             |             |             |             |
| CAPN15      | CAPN15     | 550.0060836 | 1804.689192 | 666.8059615 |             |
| 755.1852683 |            |             |             |             |             |
| ALDH6A1     | ALDH6A1    | 1448.97436  | 1643.587669 | 1478.569741 |             |
| 1717.310915 |            |             |             |             |             |
| GTF2H3      | GTF2H3     | 2464.610594 | 2383.950406 | 2231.235333 |             |
| 2576.456753 |            |             |             |             |             |
| HIST2H2BE   | HIST2H2BE  |             | 193.7521431 | 124.127403  |             |
| 538.5740458 | 265.785984 |             |             |             |             |
| ATXN2       | ATXN2      | 2187.524196 | 2035.337275 | 2185.517867 |             |
| 2275.363406 |            |             |             |             |             |
| SEMA4G      | SEMA4G     | 441.671552  | 402.3136395 | 541.9192262 |             |
| 469.7840825 |            |             |             |             |             |
| SH2D2A      | SH2D2A     | 6375.070515 | 6532.09454  | 5265.313963 |             |
| 7969.656481 |            |             |             |             |             |
| ID1         | ID1        | 17.70852921 | 31.69210289 | 23.41626286 |             |
| 39.23040355 |            |             |             |             |             |
| SLX1B       | SLX1B      | 61.45901313 | 72.1875677  | 92.54999131 |             |
| 75.51852683 |            |             |             |             |             |
| CLYBL       | CLYBL      | 116.6679571 | 154.0588335 | 249.7734705 |             |
| 402.1116364 |            |             |             |             |             |
| HDAC4       | HDAC4      | 419.79631   | 1102.180912 | 800.6131778 |             |
| 787.5503512 |            |             |             |             |             |
| MEF2D       | MEF2D      | 1363.556749 | 2392.753768 | 2028.294388 |             |
| 2116.480271 |            |             |             |             |             |
| TNRC6A      | TNRC6A     | 516.6723816 | 1095.138222 | 858.5963049 |             |
| 701.2434634 |            |             |             |             |             |
| ILF3        | ILF3       | 11607.42006 | 13360.86238 | 9605.128014 |             |
| 10494.13295 |            |             |             |             |             |
| MID2        | MID2       | 219.7940978 | 230.6480822 | 731.4794494 |             |
| 595.3213738 |            |             |             |             |             |

|             |             |             |             |             |
|-------------|-------------|-------------|-------------|-------------|
| MGAT4A      | MGAT4A      | 3177.118476 | 3588.250316 | 6819.707793 |
| 4964.607569 |             |             |             |             |
| MLYCD       | MLYCD       | 1172.92964  | 882.0968638 | 972.3324388 |
| 1058.240136 |             |             |             |             |
| PTGR1       | PTGR1       | 27.08363291 | 16.72638764 | 14.49578177 |
| 28.44204257 |             |             |             |             |
| KIN         | KIN         | 1019.802947 | 979.8141811 | 934.4203942 |
| 988.6061694 |             |             |             |             |
| SIRT4       | SIRT4       | 67.70908227 | 66.02521436 | 169.4891407 |
| 104.9413295 |             |             |             |             |
| GNLY        | GNLY        | 3598.998142 | 14772.04129 | 389.1559876 |
| 4290.825388 |             |             |             |             |
| BEX2        | BEX2        | 130.2097736 | 205.9986688 | 1360.373366 |
| 835.6075955 |             |             |             |             |
| TTC16       | TTC16       | 90.62600242 | 102.1189982 | 115.9662542 |
| 81.40308736 |             |             |             |             |
| ZNF550      | ZNF550      | 434.3798047 | 449.8517938 | 1534.322748 |
| 1009.202131 |             |             |             |             |
| HSP90AB1    | HSP90AB1    |             | 90504.12607 | 68670.62461 |
| 114525.5965 | 110404.1632 |             |             |             |
| HOMER1      | HOMER1      | 142.7099119 | 209.5200136 | 304.4114172 |
| 337.3814705 |             |             |             |             |
| ZNF620      | ZNF620      | 383.3375734 | 387.3479242 | 410.3421301 |
| 297.1703069 |             |             |             |             |
| ATF7IP2     | ATF7IP2     | 713.5495593 | 734.2003837 | 682.4168034 |
| 718.897145  |             |             |             |             |
| SDHD        | SDHD        | 10794.91107 | 8169.519857 | 10159.3129  |
| 8823.898518 |             |             |             |             |
| KLHL13      | KLHL13      | 38.54209298 | 90.67462772 | 44.60240545 |
| 116.7104506 |             |             |             |             |
| NLRC3       | NLRC3       | 5072.972779 | 6551.461937 | 2468.743142 |
| 3494.448196 |             |             |             |             |
| DEF8        | DEF8        | 1979.188559 | 1221.906634 | 1721.65285  |
| 1521.158898 |             |             |             |             |
| NRF1        | NRF1        | 2457.318847 | 2139.216945 | 2242.385934 |
| 2013.500462 |             |             |             |             |
| CACNA1F     | CACNA1F     | 2.083356377 | 6.16235334  | 43.48734531 |
| 16.67292151 |             |             |             |             |
| TENC1       | TENC1       | 32.29202385 | 33.45277527 | 110.3909535 |
| 87.28764789 |             |             |             |             |
| LDLRAD4     | LDLRAD4     | 1871.895705 | 1302.897563 | 1664.784783 |
| 1688.868873 |             |             |             |             |
| TMEM91      | TMEM91      | 188.5437522 | 181.3492554 | 248.6584104 |
| 208.9018989 |             |             |             |             |
| ZGLP1       | ZGLP1       | 32.29202385 | 22.88874098 | 23.41626286 |
| 35.30736319 |             |             |             |             |
| HNRNPF      | HNRNPF      | 35081.63804 | 31025.68839 | 31601.91932 |
| 31672.6663  |             |             |             |             |
| LOXHD1      | LOXHD1      | 0           | 1.760672383 | 0           |
| 0.980760089 |             |             |             |             |
| FOXP2       | FOXP2       | 8.33342551  | 0           | 11.15060136 |
| 1.961520177 |             |             |             |             |

|             |             |             |             |             |             |             |
|-------------|-------------|-------------|-------------|-------------|-------------|-------------|
| DDR1        | DDR1        | 0           | 0.880336191 | 0           | 0           |             |
| UBE3A       | UBE3A       | 7117.787063 | 6541.778239 | 7807.651074 |             |             |
| 7732.312539 |             |             |             |             |             |             |
| USP50       | USP50       | 36.4587366  | 44.89714576 | 47.94758586 |             |             |
| 27.46128248 |             |             |             |             |             |             |
| KEAP1       | KEAP1       | 10767.82744 | 7607.865366 | 8672.93774  |             |             |
| 6330.806372 |             |             |             |             |             |             |
| PCDH9       | PCDH9       | 0           | 17.60672383 | 1.115060136 | 8.826840798 |             |
| DGCR5       | DGCR5       | 1.041678189 | 1.760672383 | 0           | 12.74988115 |             |
| FSD2        | FSD2        | 221.8774542 | 127.6487478 | 244.1981698 |             |             |
| 208.9018989 |             |             |             |             |             |             |
| CNEP1R1     | CNEP1R1     | 2744.822027 | 2186.7551   | 2324.900384 |             |             |
| 2170.422076 |             |             |             |             |             |             |
| MRFAP1      | MRFAP1      | 4881.303992 | 4851.532751 | 6854.274658 |             |             |
| 5570.717304 |             |             |             |             |             |             |
| PGAP3       | PGAP3       | 720.8413066 | 474.5012072 | 757.1258325 |             |             |
| 594.3406137 |             |             |             |             |             |             |
| NPHP4       | NPHP4       | 458.338403  | 734.2003837 | 385.8108071 |             |             |
| 549.2256497 |             |             |             |             |             |             |
| SAR1A       | SAR1A       | 5600.061942 | 4941.327043 | 7493.204116 |             |             |
| 6042.462906 |             |             |             |             |             |             |
| THAP10      | THAP10      | 13.54181645 | 7.042689532 | 15.61084191 |             |             |
| 18.63444168 |             |             |             |             |             |             |
| PRSS23      | PRSS23      | 1525.016868 | 1906.808191 | 515.157783  |             |             |
| 428.5921587 |             |             |             |             |             |             |
| KRT23       | KRT23       | 3.125034566 | 1.760672383 | 13.38072164 | 0           |             |
| PNLDC1      | PNLDC1      | 6.250069132 | 13.20504287 | 22.30120273 |             |             |
| 3.923040355 |             |             |             |             |             |             |
| ZNF138      | ZNF138      | 633.3403387 | 701.6279446 | 1058.192069 |             |             |
| 763.031349  |             |             |             |             |             |             |
| WNT6        | WNT6        | 0           | 0           | 4.460240545 | 10.78836098 |             |
| BUB1        | BUB1        | 16980.39615 | 17425.37457 | 6857.619838 |             |             |
| 9328.009203 |             |             |             |             |             |             |
| GLS2        | GLS2        | 50.00055306 | 76.58924866 | 404.7668295 |             |             |
| 532.5527281 |             |             |             |             |             |             |
| FAM103A1    | FAM103A1    |             | 2097.939872 | 1573.160774 |             |             |
| 1807.512481 | 1414.256048 |             |             |             |             |             |
| PPIL2       | PPIL2       | 5133.390114 | 4786.387873 | 4152.483947 |             |             |
| 4436.958641 |             |             |             |             |             |             |
| H2AFJ       | H2AFJ       | 1042.719867 | 1543.229344 | 704.7180061 |             |             |
| 766.9543893 |             |             |             |             |             |             |
| KCTD20      | KCTD20      | 12003.25777 | 12520.14131 | 7732.942045 |             |             |
| 9339.778324 |             |             |             |             |             |             |
| LINC00971   | LINC00971   |             | 0           | 0           | 0           | 0.980760089 |
| ARHGEF26    | ARHGEF26    |             | 19.79188559 | 36.97412004 |             |             |
| 25.64638313 | 8.826840798 |             |             |             |             |             |
| KIFC1       | KIFC1       | 32.29202385 | 35.21344766 | 49.062646   |             |             |
| 18.63444168 |             |             |             |             |             |             |
| BRE         | BRE         | 3927.126771 | 3096.142385 | 3334.029807 |             |             |
| 3676.869572 |             |             |             |             |             |             |

|             |           |             |             |             |             |
|-------------|-----------|-------------|-------------|-------------|-------------|
| ZNF195      | ZNF195    | 1653.143285 | 1568.759093 | 1937.974517 |             |
| 1776.156521 |           |             |             |             |             |
| B3GNT9      | B3GNT9    | 778.133607  | 748.2857627 | 604.3625939 |             |
| 386.4194749 |           |             |             |             |             |
| UCP1        | UCP1      | 2.083356377 | 0           | 0           |             |
| HES4        | HES4      | 1.041678189 | 2.641008574 | 14.49578177 |             |
| 12.74988115 |           |             |             |             |             |
| KCNN3       | KCNN3     | 6.250069132 | 7.923025723 | 45.71746559 |             |
| 8.826840798 |           |             |             |             |             |
| GAR1        | GAR1      | 1763.561173 | 1836.381295 | 1559.969131 |             |
| 1534.889539 |           |             |             |             |             |
| ODF2        | ODF2      | 6589.656222 | 6190.524098 | 5083.559161 |             |
| 6316.094971 |           |             |             |             |             |
| ARHGDI1     | ARHGDI1   | 6088.609013 | 11973.45254 | 5115.895905 |             |
| 5161.740347 |           |             |             |             |             |
| ABCB9       | ABCB9     | 85.41761147 | 39.61512861 | 119.3114346 |             |
| 106.9028497 |           |             |             |             |             |
| CINP        | CINP      | 1948.979891 | 1348.675045 | 1707.157069 |             |
| 1731.041557 |           |             |             |             |             |
| LNX1        | LNX1      | 92.70935879 | 83.63193819 | 126.0017954 |             |
| 101.0182891 |           |             |             |             |             |
| PSMB8-AS1   | PSMB8-AS1 |             | 0           | 1.115060136 | 0           |
| CNDP2       | CNDP2     | 9429.270964 | 8085.887918 | 10469.29962 |             |
| 10392.1339  |           |             |             |             |             |
| RUNDC3A     | RUNDC3A   | 4.166712755 | 11.44437049 | 10.03554123 |             |
| 7.846080709 |           |             |             |             |             |
| RUSC2       | RUSC2     | 93.75103698 | 139.0931182 | 90.31987104 |             |
| 193.2097375 |           |             |             |             |             |
| TNFSF4      | TNFSF4    | 751.0499741 | 143.4947992 | 2197.783529 |             |
| 607.0904949 |           |             |             |             |             |
| MYO9B       | MYO9B     | 2562.528344 | 4962.455111 | 2551.257592 |             |
| 2877.5501   |           |             |             |             |             |
| CBWD6       | CBWD6     | 119.7929917 | 86.27294676 | 108.1608332 |             |
| 124.5565313 |           |             |             |             |             |
| TUBA8       | TUBA8     | 44.79216211 | 36.97412004 | 137.1523968 |             |
| 86.3068878  |           |             |             |             |             |
| RPS12       | RPS12     | 6720.907673 | 9344.768672 | 14605.05766 |             |
| 10398.01846 |           |             |             |             |             |
| STRA6       | STRA6     | 9.375103698 | 0.880336191 | 1.115060136 | 0           |
| KIAA1522    | KIAA1522  |             | 21.87524196 | 10.5640343  |             |
| 7.805420954 |           |             |             |             |             |
| PREPL       | PREPL     | 2223.982933 | 2714.956814 | 3695.309292 |             |
| 4070.154368 |           |             |             |             |             |
| CCPG1       | CCPG1     | 2400.026547 | 1874.235752 | 2454.24736  |             |
| 2019.385023 |           |             |             |             |             |
| ELOVL5      | ELOVL5    | 14528.2857  | 14419.02648 | 11625.61698 |             |
| 10613.78568 |           |             |             |             |             |
| CCR9        | CCR9      | 1.041678189 | 0           | 30.10662368 | 45.11496408 |
| KPTN        | KPTN      | 530.214198  | 606.5516359 | 355.7041835 |             |
| 406.0346767 |           |             |             |             |             |

|         |         |             |             |             |             |
|---------|---------|-------------|-------------|-------------|-------------|
| CACNA1G | CACNA1G | 0           | 0           | 0           | 0.980760089 |
| USP43   | USP43   | 0           | 11.44437049 | 3.345180409 | 23.53824213 |
| CD2     | CD2     | 37755.62595 | 33568.09932 | 21748.1329  |             |
|         |         | 30083.83496 |             |             |             |
| DDX56   | DDX56   | 9508.438506 | 5725.706589 | 8846.887121 |             |
|         |         | 8854.30208  |             |             |             |
| SLC35G1 | SLC35G1 | 382.2958953 | 465.6978453 | 326.7126199 |             |
|         |         | 355.0351521 |             |             |             |
| PXK     | PXK     | 2787.530833 | 3555.677877 | 2291.44858  |             |
|         |         | 2513.688107 |             |             |             |
| CTBP2   | CTBP2   | 10.41678189 | 12.32470668 | 21.18614259 |             |
|         |         | 40.21116364 |             |             |             |
| SLC1A3  | SLC1A3  | 0           | 2.641008574 | 10.03554123 | 1.961520177 |
| WT1     | WT1     | 0           | 3.521344766 | 0           | 0           |
| NODAL   | NODAL   | 5.208390943 | 5.282017149 | 20.07108245 |             |
|         |         | 9.807600887 |             |             |             |
| CENPU   | CENPU   | 5659.437599 | 5406.144552 | 2860.12925  |             |
|         |         | 3855.367909 |             |             |             |
| GSN     | GSN     | 206.2522814 | 370.6215366 | 249.7734705 |             |
|         |         | 241.2669818 |             |             |             |
| SHOX2   | SHOX2   | 0           | 1.760672383 | 0           | 0           |
| BCAT1   | BCAT1   | 973.9691064 | 8095.571616 | 824.0294407 |             |
|         |         | 4549.746051 |             |             |             |
| LOX     | LOX     | 3.125034566 | 14.96571525 | 12.2656615  |             |
|         |         | 7.846080709 |             |             |             |
| KIFAP3  | KIFAP3  | 3876.08454  | 2716.717487 | 3355.21595  |             |
|         |         | 2505.842027 |             |             |             |
| STAT6   | STAT6   | 4259.422114 | 6365.711    | 9396.611768 |             |
|         |         | 12132.0023  |             |             |             |
| FAM185A | FAM185A | 475.005254  | 319.5620375 | 489.5113998 |             |
|         |         | 564.9178111 |             |             |             |
| CDK1    | CDK1    | 17747.0713  | 15581.07025 | 11120.49474 |             |
|         |         | 12979.37901 |             |             |             |
| ZFY     | ZFY     | 0           | 1250.077392 | 0           | 1346.583602 |
| SLC35C1 | SLC35C1 | 1220.846837 | 1105.702256 | 1605.686596 |             |
|         |         | 1146.508544 |             |             |             |
| NT5C3A  | NT5C3A  | 3683.374075 | 2537.128904 | 4735.660399 |             |
|         |         | 2714.743925 |             |             |             |
| KRT72   | KRT72   | 0           | 0           | 0           | 8.826840798 |
| IL1R2   | IL1R2   | 1688.560344 | 248.254806  | 1187.539045 |             |
|         |         | 921.9144833 |             |             |             |
| FNTA    | FNTA    | 7379.248289 | 5105.94991  | 6781.795749 |             |
|         |         | 6415.15174  |             |             |             |
| PPP1R1C | PPP1R1C | 0           | 2.641008574 | 0           | 3.923040355 |
| MLIP    | MLIP    | 0           | 0           | 1.115060136 | 0           |
| FAM131B | FAM131B | 4.166712755 | 36.09378385 | 40.14216491 |             |
|         |         | 37.26888337 |             |             |             |
| JADE1   | JADE1   | 3214.61889  | 2676.222022 | 4484.771868 |             |
|         |         | 3122.740122 |             |             |             |
| CEBPA   | CEBPA   | 42.70880574 | 70.42689532 | 28.99156354 |             |

|             |             |             |             |             |             |   |
|-------------|-------------|-------------|-------------|-------------|-------------|---|
| 39.23040355 |             |             |             |             |             |   |
| TCTEX1D4    | TCTEX1D4    |             | 306.2533875 |             | 157.5801783 |   |
| 365.7397247 | 281.4781454 |             |             |             |             |   |
| ADAMTSL2    | ADAMTSL2    |             | 0           | 0           | 6.690360818 |   |
| 13.73064124 |             |             |             |             |             |   |
| FAM133A     | FAM133A     | 1.041678189 | 0           | 3.345180409 | 0           |   |
| KDF1        | KDF1        | 0           | 0.880336191 | 120.4264947 | 37.26888337 |   |
| LMF1        | LMF1        | 306.2533875 | 290.5109432 | 522.9632039 |             |   |
| 604.1482146 |             |             |             |             |             |   |
| LOC645513   | LOC645513   |             | 462.5051158 | 545.8084387 |             |   |
| 550.8397073 | 654.1669791 |             |             |             |             |   |
| CCNT2-AS1   | CCNT2-AS1   |             | 36.4587366  | 42.25613719 |             |   |
| 75.82408927 | 44.13420399 |             |             |             |             |   |
| LINC00940   | LINC00940   |             | 1.041678189 | 0           | 0           | 0 |
| MIR4687     | MIR4687     | 108.3345316 | 251.7761508 | 105.9307129 |             |   |
| 126.5180514 |             |             |             |             |             |   |
| MIR4685     | MIR4685     | 12.50013826 | 14.08537906 | 13.38072164 |             |   |
| 10.78836098 |             |             |             |             |             |   |
| MIR4681     | MIR4681     | 8.33342551  | 3.521344766 | 2.230120273 |             |   |
| 4.903800443 |             |             |             |             |             |   |
| MIR4680     | MIR4680     | 533.3392326 | 383.8265795 | 2308.174482 |             |   |
| 1678.080512 |             |             |             |             |             |   |
| MIR6509     | MIR6509     | 0           | 1.115060136 | 0           |             |   |
| RARS2       | RARS2       | 2704.196578 | 2486.949741 | 2526.726269 |             |   |
| 2854.992618 |             |             |             |             |             |   |
| BIVM        | BIVM        | 1895.854303 | 1958.748026 | 767.1613738 |             |   |
| 1275.968875 |             |             |             |             |             |   |
| PCDHGC5     | PCDHGC5     | 4.166712755 | 4.401680957 | 33.45180409 |             |   |
| 10.78836098 |             |             |             |             |             |   |
| FLJ46906    | FLJ46906    |             | 5.208390943 | 11.44437049 |             | 0 |
| 7.846080709 |             |             |             |             |             |   |
| GABRB3      | GABRB3      | 0           | 0           | 0           | 9.807600887 |   |
| NFATC1      | NFATC1      | 2601.070437 | 3788.966968 | 4103.421301 |             |   |
| 6156.231077 |             |             |             |             |             |   |
| HJURP       | HJURP       | 9007.391298 | 7030.364825 | 3513.554489 |             |   |
| 5293.162199 |             |             |             |             |             |   |
| EIF4E2      | EIF4E2      | 8000.088489 | 7375.456612 | 5549.654298 |             |   |
| 6320.998771 |             |             |             |             |             |   |
| PABPC4      | PABPC4      | 814.5923436 | 1493.930517 | 1096.104114 |             |   |
| 1060.201656 |             |             |             |             |             |   |
| SLC01C1     | SLC01C1     | 0           | 0.880336191 | 0           | 0           |   |
| CXorf56     | CXorf56     | 985.4275665 | 812.5503047 | 1090.528813 |             |   |
| 982.7216088 |             |             |             |             |             |   |
| SLC14A1     | SLC14A1     | 39.58377117 | 7.923025723 | 47.94758586 |             |   |
| 29.42280266 |             |             |             |             |             |   |
| SLC23A3     | SLC23A3     | 8.33342551  | 30.8117667  | 25.64638313 |             |   |
| 22.55748204 |             |             |             |             |             |   |
| RHBDD2      | RHBDD2      | 5597.978586 | 4238.818762 | 5986.757872 |             |   |
| 4394.785957 |             |             |             |             |             |   |
| TRPC4AP     | TRPC4AP     | 13360.56445 | 10284.08739 | 9631.889457 |             |   |

|             |             |             |             |             |             |
|-------------|-------------|-------------|-------------|-------------|-------------|
| 10729.51537 |             |             |             |             |             |
| NOP10       | NOP10       | 9383.437124 | 9683.698106 | 7839.987818 |             |
| 8333.518473 |             |             |             |             |             |
| DHRS1       | DHRS1       | 545.8393709 | 471.8601986 | 462.7499566 |             |
| 570.8023716 |             |             |             |             |             |
| MICA        | MICA        | 136.4598427 | 147.016144  | 204.0560049 |             |
| 180.4598563 |             |             |             |             |             |
| TAZ         | TAZ         | 1923.979615 | 1996.602482 | 1673.705265 |             |
| 2119.422552 |             |             |             |             |             |
| CCL17       | CCL17       | 29.16698928 | 0           | 226.3572077 | 0           |
| CCL3        | CCL3        | 5187.55738  | 11001.56138 | 4356.539952 |             |
| 15692.16142 |             |             |             |             |             |
| SMARCE1     | SMARCE1     | 10863.66183 | 9551.647677 | 7860.058901 |             |
| 8959.24341  |             |             |             |             |             |
| XYLB        | XYLB        | 405.2128154 | 428.7237252 | 402.5367092 |             |
| 410.9384772 |             |             |             |             |             |
| PLCH2       | PLCH2       | 16.66685102 | 43.13647338 | 11.15060136 |             |
| 118.6719707 |             |             |             |             |             |
| OR1A1       | OR1A1       | 0           | 0           | 0.980760089 |             |
| MFGE8       | MFGE8       | 161.4601192 | 617.1156702 | 149.4180583 |             |
| 165.748455  |             |             |             |             |             |
| SRPK3       | SRPK3       | 2.083356377 | 14.08537906 | 1.115060136 |             |
| 2.942280266 |             |             |             |             |             |
| LHX6        | LHX6        | 4.166712755 | 1.760672383 | 0           | 2.942280266 |
| KIR2DS5     | KIR2DS5     | 0           | 6.690360818 | 0           |             |
| TM9SF3      | TM9SF3      | 11983.46588 | 12693.56754 | 11671.33445 |             |
| 11510.2004  |             |             |             |             |             |
| SERHL2      | SERHL2      | 154.1683719 | 232.4087545 | 284.3403347 |             |
| 360.9197126 |             |             |             |             |             |
| N4BP2L2-IT2 | N4BP2L2-IT2 | 17.84096218 | 17.70852921 | 0.880336191 |             |
| 17.84096218 |             | 19.61520177 |             |             |             |
| PHLDB1      | PHLDB1      | 30.20866747 | 22.88874098 | 92.54999131 |             |
| 86.3068878  |             |             |             |             |             |
| DUS3L       | DUS3L       | 4000.044245 | 2780.101693 | 2877.970212 |             |
| 3143.336084 |             |             |             |             |             |
| CYP2U1      | CYP2U1      | 416.6712755 | 485.9455777 | 554.1848877 |             |
| 465.8610421 |             |             |             |             |             |
| SLAIN1      | SLAIN1      | 4045.878085 | 3748.471503 | 3248.170177 |             |
| 3609.197126 |             |             |             |             |             |
| ZNRD1       | ZNRD1       | 1.041678189 | 1719.296582 | 2.230120273 |             |
| 1397.583126 |             |             |             |             |             |
| ULK3        | ULK3        | 4056.294867 | 4430.732052 | 2883.545512 |             |
| 4744.917309 |             |             |             |             |             |
| CYFIP2      | CYFIP2      | 25562.78275 | 23454.79715 | 26533.971   |             |
| 27971.27773 |             |             |             |             |             |
| LIMS1       | LIMS1       | 5919.857146 | 6449.342938 | 3064.185254 |             |
| 5044.049136 |             |             |             |             |             |
| SSPN        | SSPN        | 0           | 0           | 9.807600887 |             |
| AOC2        | AOC2        | 57.29230038 | 80.11059342 | 85.85963049 |             |
| 34.3266031  |             |             |             |             |             |

|             |          |               |               |               |   |
|-------------|----------|---------------|---------------|---------------|---|
| MY06        | MY06     | 227.0858451   | 328.3653994   | 464.9800768   |   |
| 377.5926341 |          |               |               |               |   |
| ST20        | ST20     | 401.0461026   | 445.4501129   | 257.5788915   |   |
| 376.611874  |          |               |               |               |   |
| PRR4        | PRR4     | 34.37538023   | 28.17075813   | 24.531323     |   |
| 42.17268381 |          |               |               |               |   |
| AC02        | AC02     | 17135.6062    | 12638.9867    | 11732.66275   |   |
| 13669.83412 |          |               |               |               |   |
| MIRLET7B    | MIRLET7B |               | 0 0           | 5.575300681   | 0 |
| POU5F1      | POU5F1   | 4.166712755   | 4.401680957   | 0 0           |   |
| LST1        | LST1     | 7.291747321   | 0.880336191   | 3.345180409   |   |
| 2.942280266 |          |               |               |               |   |
| MROH7       | MROH7    | 0 0           | 0 0.980760089 |               |   |
| SCIMP       | SCIMP    | 12.50013826   | 7.923025723   | 25.64638313   |   |
| 14.71140133 |          |               |               |               |   |
| RSRC1       | RSRC1    | 1173.971319   | 1218.385289   | 795.0378772   |   |
| 1095.509019 |          |               |               |               |   |
| GCSAML      | GCSAML   | 0 6.16235334  | 0             | 39.23040355   |   |
| LFNG        | LFNG     | 165.626832    | 249.1351422   | 79.16926967   |   |
| 67.67244612 |          |               |               |               |   |
| TNRC6B      | TNRC6B   | 2110.44001    | 2310.002166   | 3931.70204    |   |
| 3007.991192 |          |               |               |               |   |
| PRKAG2      | PRKAG2   | 1314.597874   | 1233.351004   | 2356.122068   |   |
| 1888.943931 |          |               |               |               |   |
| PPP1R18     | PPP1R18  | 0 0.880336191 | 1.115060136   | 0             |   |
| HOGA1       | HOGA1    | 1.041678189   | 0 0           | 0             |   |
| KCNQ3       | KCNQ3    | 3.125034566   | 9.683698106   | 0 9.807600887 |   |
| SEC61G      | SEC61G   | 5578.1867     | 6118.33653    | 4765.767022   |   |
| 4673.321823 |          |               |               |               |   |
| TMEM218     | TMEM218  | 1243.763757   | 1287.051512   | 975.6776192   |   |
| 1044.509494 |          |               |               |               |   |
| NBPF8       | NBPF8    | 416.6712755   | 752.6874437   | 559.7601884   |   |
| 561.9755308 |          |               |               |               |   |
| CD33        | CD33     | 127.084739    | 6.16235334    | 66.90360818   |   |
| 16.67292151 |          |               |               |               |   |
| LEKR1       | LEKR1    | 31.25034566   | 50.17916291   | 78.05420954   |   |
| 50.01876452 |          |               |               |               |   |
| UNG         | UNG      | 5808.39758    | 5602.459522   | 5032.266395   |   |
| 5468.718254 |          |               |               |               |   |
| FAM83D      | FAM83D   | 2401.068225   | 2003.645172   | 1287.894457   |   |
| 1538.812579 |          |               |               |               |   |
| FIP1L1      | FIP1L1   | 6732.366134   | 5369.170432   | 4965.362787   |   |
| 5408.891889 |          |               |               |               |   |
| CHKA        | CHKA     | 1409.390589   | 965.728802    | 1203.149887   |   |
| 909.1646022 |          |               |               |               |   |
| S1PR1       | S1PR1    | 12662.64006   | 14868.87827   | 8514.599201   |   |
| 8488.478567 |          |               |               |               |   |
| CHGA        | CHGA     | 0 0.880336191 | 6.690360818   | 0.980760089   |   |
| HLA-A       | HLA-A    | 65618.43414   | 83479.64003   | 85973.36663   |   |
| 107179.424  |          |               |               |               |   |



|             |             |             |             |             |             |
|-------------|-------------|-------------|-------------|-------------|-------------|
| SC01        | SC01        | 3664.623868 | 2714.076478 | 2796.570822 |             |
| 2840.281217 |             |             |             |             |             |
| KLHL41      | KLHL41      | 10.41678189 | 8.803361914 | 22.30120273 |             |
| 6.865320621 |             |             |             |             |             |
| EGR1        | EGR1        | 531.2558762 | 823.9946752 | 813.9938995 |             |
| 1940.924215 |             |             |             |             |             |
| GLRX        | GLRX        | 5949.024136 | 5090.984195 | 3646.246646 |             |
| 3151.182165 |             |             |             |             |             |
| EGF         | EGF         | 0           | 0           | 2.230120273 | 0           |
| RNH1        | RNH1        | 8561.553033 | 6633.333202 | 10053.38219 |             |
| 9941.965019 |             |             |             |             |             |
| SLC2A5      | SLC2A5      | 21.87524196 | 18.48706002 | 0           | 1.961520177 |
| RNF4        | RNF4        | 13044.93596 | 10748.02456 | 12721.72109 |             |
| 10823.66834 |             |             |             |             |             |
| SEMA3F      | SEMA3F      | 0           | 1.760672383 | 0           | 0           |
| EDN1        | EDN1        | 0           | 0.880336191 | 0           | 0           |
| PPP4R1      | PPP4R1      | 2704.196578 | 2526.564869 | 1712.732369 |             |
| 2071.365307 |             |             |             |             |             |
| CA7         | CA7         | 5.208390943 | 7.923025723 | 0           | 23.53824213 |
| CA3         | CA3         | 0           | 0.880336191 | 5.575300681 | 3.923040355 |
| TRMT6       | TRMT6       | 2321.900683 | 1662.074729 | 2080.702214 |             |
| 2183.171957 |             |             |             |             |             |
| AKAP1       | AKAP1       | 3435.454666 | 2287.113425 | 2923.687677 |             |
| 3001.125871 |             |             |             |             |             |
| GRAMD1B     | GRAMD1B     | 2784.405798 | 4958.933766 | 987.9432807 |             |
| 1813.425404 |             |             |             |             |             |
| ARNTL2      | ARNTL2      | 4524.008374 | 3510.780731 | 2029.409448 |             |
| 1770.27196  |             |             |             |             |             |
| HIPK3       | HIPK3       | 2418.776754 | 3723.82209  | 3673.008089 |             |
| 3350.276463 |             |             |             |             |             |
| AKT1S1      | AKT1S1      | 426.0463792 | 507.0736463 | 540.8041661 |             |
| 466.8418022 |             |             |             |             |             |
| ZNF205      | ZNF205      | 42.70880574 | 19.36739621 | 47.94758586 |             |
| 14.71140133 |             |             |             |             |             |
| ADAM29      | ADAM29      | 0           | 7.923025723 | 5.575300681 | 2.942280266 |
| ZNF112      | ZNF112      | 0           | 4.401680957 | 24.531323   | 6.865320621 |
| LOC401010   | LOC401010   |             | 10.41678189 | 5.282017149 |             |
| 16.72590204 | 7.846080709 |             |             |             |             |
| ZNF839      | ZNF839      | 661.4656498 | 660.2521436 | 544.1493465 |             |
| 689.4743423 |             |             |             |             |             |
| PTGS1       | PTGS1       | 19.79188559 | 6.16235334  | 0           | 13.73064124 |
| ATF2        | ATF2        | 5179.223954 | 5553.160696 | 4782.492924 |             |
| 4842.993318 |             |             |             |             |             |
| THSD1       | THSD1       | 0           | 11.44437049 | 18.95602232 | 11.76912106 |
| GAS2L1      | GAS2L1      | 69.79243864 | 208.6396774 | 14.49578177 |             |
| 70.61472638 |             |             |             |             |             |
| FXD1        | FXD1        | 3.125034566 | 9.683698106 | 8.92048109  |             |
| 9.807600887 |             |             |             |             |             |
| CCDC144CP   | CCDC144CP   |             | 4.166712755 | 3.521344766 |             |
| 1.115060136 | 6.865320621 |             |             |             |             |

|             |           |             |             |             |             |
|-------------|-----------|-------------|-------------|-------------|-------------|
| ICOSLG      | ICOSLG    | 265.6279381 | 349.493468  | 154.9933589 |             |
| 134.3641321 |           |             |             |             |             |
| IL1RAP      | IL1RAP    | 1073.970213 | 1228.068987 | 703.602946  |             |
| 591.3983335 |           |             |             |             |             |
| MROH8       | MROH8     | 1110.428949 | 791.4222361 | 774.9667947 |             |
| 729.685506  |           |             |             |             |             |
| PDHA1       | PDHA1     | 7468.832613 | 5494.178171 | 6612.306608 |             |
| 7765.658382 |           |             |             |             |             |
| IFT22       | IFT22     | 517.7140598 | 421.6810357 | 398.0764686 |             |
| 372.6888337 |           |             |             |             |             |
| LINC00669   | LINC00669 |             | 1.041678189 | 9.683698106 | 0           |
| 0.980760089 |           |             |             |             |             |
| M1AP        | M1AP      | 7.291747321 | 5.282017149 | 2.230120273 |             |
| 8.826840798 |           |             |             |             |             |
| EMC1        | EMC1      | 5018.805513 | 3978.239249 | 4381.071275 |             |
| 4142.730615 |           |             |             |             |             |
| FKBP6       | FKBP6     | 0           | 0           | 1.115060136 | 0           |
| TREX1       | TREX1     | 3248.994271 | 2655.093953 | 3867.028553 |             |
| 3060.952237 |           |             |             |             |             |
| SCMH1       | SCMH1     | 637.5070515 | 803.7469428 | 582.0613911 |             |
| 792.4541516 |           |             |             |             |             |
| JKAMP       | JKAMP     | 6117.776002 | 4391.116923 | 4518.223672 |             |
| 3962.270758 |           |             |             |             |             |
| MED30       | MED30     | 2144.815391 | 2293.275779 | 2027.179328 |             |
| 1835.002126 |           |             |             |             |             |
| KCNB1       | KCNB1     | 0           | 0.880336191 | 0           |             |
| PIR-FIGF    | PIR-FIGF  |             | 681.2575354 | 337.1687613 |             |
| 123.7716751 |           | 80.42232727 |             |             |             |
| IL17RC      | IL17RC    | 103.1261407 | 144.3751354 | 198.4807043 |             |
| 165.748455  |           |             |             |             |             |
| MYNN        | MYNN      | 2383.359696 | 1813.492554 | 2601.435298 |             |
| 2254.767444 |           |             |             |             |             |
| DDX39B      | DDX39B    | 3.125034566 | 9.683698106 | 3.345180409 |             |
| 4.903800443 |           |             |             |             |             |
| C21orf62    | C21orf62  |             | 3.125034566 | 0.880336191 |             |
| 6.690360818 |           | 4.903800443 |             |             |             |
| BEX4        | BEX4      | 537.5059454 | 582.7825587 | 2124.18956  |             |
| 1494.678375 |           |             |             |             |             |
| RPEL1       | RPEL1     | 0           | 0.880336191 | 1.115060136 | 0           |
| IMPDH1      | IMPDH1    | 6027.15     | 5098.026885 | 4181.475511 | 5634.466709 |
| TSP02       | TSP02     | 0           | 4.401680957 | 5.575300681 | 0.980760089 |
| ARAP1       | ARAP1     | 3306.286571 | 4398.159612 | 4170.32491  |             |
| 4308.47907  |           |             |             |             |             |
| PDE8B       | PDE8B     | 4.166712755 | 13.20504287 | 33.45180409 |             |
| 22.55748204 |           |             |             |             |             |
| SUC0        | SUC0      | 1582.309169 | 1660.314057 | 3257.090658 |             |
| 1861.482648 |           |             |             |             |             |
| C18orf54    | C18orf54  |             | 952.0938645 | 1088.975869 |             |
| 650.0800594 |           | 590.4175734 |             |             |             |
| ELAC1       | ELAC1     | 972.9274282 | 762.3711418 | 1034.775806 |             |

|                        |                        |             |             |             |             |
|------------------------|------------------------|-------------|-------------|-------------|-------------|
| 945.4527255            |                        |             |             |             |             |
| CCDC7                  | CCDC7                  | 160.4184411 | 197.1953069 | 188.445163  |             |
| 221.65178              |                        |             |             |             |             |
| TSPAN5                 | TSPAN5                 | 3392.745861 | 4107.648669 | 2123.074499 |             |
| 2959.933948            |                        |             |             |             |             |
| CNOT4                  | CNOT4                  | 1900.021016 | 1614.536575 | 2888.005753 |             |
| 1701.618754            |                        |             |             |             |             |
| 1-Dec                  | 1-Dec                  | 1.041678189 | 3.521344766 | 0           | 1.961520177 |
| TMED9                  | TMED9                  | 8566.761424 | 4676.345849 | 6828.628274 |             |
| 5046.010656            |                        |             |             |             |             |
| SHANK2                 | SHANK2                 | 0           | 0           | 1.115060136 | 0           |
| LRPPRC                 | LRPPRC                 | 10958.45455 | 9674.894744 | 11017.90921 |             |
| 10378.40326            |                        |             |             |             |             |
| HSPA8                  | HSPA8                  | 201264.7262 | 110265.6293 | 223045.4791 |             |
| 154510.9059            |                        |             |             |             |             |
| IGF2BP3                | IGF2BP3                | 29.16698928 | 33.45277527 | 7.805420954 |             |
| 40.21116364            |                        |             |             |             |             |
| GTDC1                  | GTDC1                  | 1914.604511 | 1925.295251 | 927.7300334 |             |
| 1717.310915            |                        |             |             |             |             |
| SYPL2                  | SYPL2                  | 0           | 2.641008574 | 0           | 0           |
| TMEM150A               | TMEM150A               |             | 218.7524196 | 148.7768164 |             |
| 438.2186336            | 514.8990466            |             |             |             |             |
| EPN1                   | EPN1                   | 388.5459644 | 914.6693029 | 375.7752659 |             |
| 348.1698315            |                        |             |             |             |             |
| SKAP1                  | SKAP1                  | 5463.6021   | 5565.485402 | 3941.737582 |             |
| 6019.905424            |                        |             |             |             |             |
| ANKRD30B               | ANKRD30B               |             | 1.041678189 | 0           | 1.115060136 |
| 0                      |                        |             |             |             |             |
| PLEC                   | PLEC                   | 3255.24434  | 4750.294089 | 2563.523253 |             |
| 2618.629437            |                        |             |             |             |             |
| TAF1C                  | TAF1C                  | 704.1744556 | 1354.837399 | 774.9667947 |             |
| 1154.354624            |                        |             |             |             |             |
| MYH14                  | MYH14                  | 0           | 0           | 1.115060136 | 0           |
| LOC81691               | LOC81691               |             | 791.6754234 | 917.3103115 |             |
| 568.6806695            | 787.5503512            |             |             |             |             |
| ZNF502                 | ZNF502                 | 22.91692015 | 16.72638764 | 166.1439603 |             |
| 168.6907353            |                        |             |             |             |             |
| MIEF2                  | MIEF2                  | 519.7974162 | 541.4067577 | 576.4860904 |             |
| 496.2646049            |                        |             |             |             |             |
| OR4N2                  | OR4N2                  | 0           | 0           | 3.345180409 | 0           |
| ZSCAN2                 | ZSCAN2                 | 456.2550466 | 465.6978453 | 548.609587  |             |
| 505.0914457            |                        |             |             |             |             |
| C9orf131               | C9orf131               |             | 36.4587366  | 19.36739621 |             |
| 117.0813143            | 30.40356275            |             |             |             |             |
| GXYLT2                 | GXYLT2                 | 1.041678189 | 12.32470668 | 0           | 10.78836098 |
| PPM1N                  | PPM1N                  | 88.54264604 | 67.78588674 | 82.51445008 |             |
| 105.9220896            |                        |             |             |             |             |
| STAG3L5P-PVRIG2P-PILRB | STAG3L5P-PVRIG2P-PILRB |             |             | 1823.978508 |             |
| 2339.933597            | 2027.179328            |             | 3118.817082 |             |             |
| WHAMMP1                | WHAMMP1                | 50.00055306 | 32.57243908 | 411.4571903 |             |

|                 |               |             |             |             |
|-----------------|---------------|-------------|-------------|-------------|
| 318.7470288     |               |             |             |             |
| CCDC144B        | CCDC144B      |             | 335.4203768 | 435.7664148 |
| 286.570455      | 611.9942953   |             |             |             |
| MROH6 MROH6     | 8.33342551    |             | 38.73479242 | 11.15060136 |
| 13.73064124     |               |             |             |             |
| KLHL35 KLHL35   | 22.91692015   |             | 13.20504287 | 39.02710477 |
| 40.21116364     |               |             |             |             |
| CD74 CD74       | 61621.51493   |             | 77103.36499 | 37195.06097 |
| 33398.80406     |               |             |             |             |
| PLEKHB2 PLEKHB2 | 17627.27831   |             | 12829.13932 | 13520.10415 |
| 11459.20088     |               |             |             |             |
| DNAJA3 DNAJA3   | 9207.39351    |             | 6085.764091 | 9430.063572 |
| 8144.231776     |               |             |             |             |
| ENPP2 ENPP2     | 570.8396474   |             | 2679.743367 | 554.1848877 |
| 1303.430158     |               |             |             |             |
| ATP4B ATP4B     | 0 0.880336191 | 0           | 0           | 0           |
| CELA1 CELA1     | 5.208390943   |             | 28.17075813 | 12.2656615  |
| 4.903800443     |               |             |             |             |
| IL10 IL10       | 2513.569469   |             | 3489.652663 | 1229.91133  |
| 1243.603792     |               |             |             |             |
| POU1F1 POU1F1   | 0 0           | 0           | 0.980760089 |             |
| HOXA10 HOXA10   | 1.041678189   |             | 1.760672383 | 8.92048109  |
| 6.865320621     |               |             |             |             |
| SPATA22 SPATA22 | 1.041678189   |             | 7.923025723 | 3.345180409 |
| 6.865320621     |               |             |             |             |
| MBNL3 MBNL3     | 428.1297356   |             | 919.0709839 | 764.9312535 |
| 727.7239858     |               |             |             |             |
| PLEKHH1 PLEKHH1 | 155.2100501   |             | 88.03361914 | 235.2776888 |
| 175.5560559     |               |             |             |             |
| TAOK1 TAOK1     | 443.7549084   |             | 806.3879514 | 883.1276279 |
| 617.8788559     |               |             |             |             |
| CARD6 CARD6     | 643.7571206   |             | 535.2444044 | 344.5535821 |
| 414.8615175     |               |             |             |             |
| GPR126 GPR126   | 0 8.803361914 | 27.87650341 |             | 20.59596186 |
| WDR35 WDR35     | 512.5056688   |             | 541.4067577 | 595.4421128 |
| 719.8779051     |               |             |             |             |
| PPP1R9A PPP1R9A | 0 0           |             | 4.460240545 | 1.961520177 |
| TMEM200A        | TMEM200A      |             | 393.7543553 | 288.7502708 |
| 392.501168      | 272.6513047   |             |             |             |
| PJA1 PJA1       | 1466.68289    |             | 1549.391697 | 2621.50638  |
| 2351.862693     |               |             |             |             |
| GPRIN1 GPRIN1   | 594.7982457   |             | 714.8329874 | 380.2355065 |
| 614.9365756     |               |             |             |             |
| INSL3 INSL3     | 269.7946509   |             | 235.0497631 | 325.5975598 |
| 320.708549      |               |             |             |             |
| LOC729683       | LOC729683     |             | 272.9196854 | 344.2114509 |
| 360.164424      | 449.1881206   |             |             |             |
| MIR3127 MIR3127 | 1.041678189   | 0           | 0           | 0           |
| AIFM3 AIFM3     | 6.250069132   |             | 3.521344766 | 11.15060136 |
| 2.942280266     |               |             |             |             |

|             |           |             |             |             |            |
|-------------|-----------|-------------|-------------|-------------|------------|
| XRR1        | XRR1      | 1917.729545 | 704.2689532 | 2608.125659 |            |
| 936.6258847 |           |             |             |             |            |
| TMC8        | TMC8      | 4986.513489 | 6020.619213 | 2338.281106 |            |
| 3879.886911 |           |             |             |             |            |
| POLR2H      | POLR2H    | 4465.674395 | 3913.974707 | 3681.92857  |            |
| 4166.268857 |           |             |             |             |            |
| FMN1        | FMN1      | 0           | 2.641008574 | 69.13372845 | 0          |
| PTPRCAP     | PTPRCAP   | 23039.83818 | 21839.38024 | 8469.996795 |            |
| 13517.8163  |           |             |             |             |            |
| NAA20       | NAA20     | 6952.160231 | 5120.035289 | 5695.727176 |            |
| 5866.90685  |           |             |             |             |            |
| MIR3618     | MIR3618   | 84.37593328 | 66.90555055 | 91.43493117 |            |
| 51.9802847  |           |             |             |             |            |
| MIR3615     | MIR3615   | 1530.225259 | 1214.863944 | 450.4842951 |            |
| 583.5522528 |           |             |             |             |            |
| RPS18P9     | RPS18P9   | 22.91692015 | 17.60672383 | 32.33674395 |            |
| 36.28812328 |           |             |             |             |            |
| IL13RA1     | IL13RA1   | 21.87524196 | 18.48706002 | 2.230120273 |            |
| 78.46080709 |           |             |             |             |            |
| TMEM262     | TMEM262   | 33.33370204 | 47.53815434 | 63.55842777 |            |
| 47.07648426 |           |             |             |             |            |
| RPA2        | RPA2      | 17456.44309 | 10419.65916 | 14939.57571 |            |
| 12504.69113 |           |             |             |             |            |
| UQCRH       | UQCRH     | 9437.60439  | 9234.726648 | 6319.045792 |            |
| 6492.631787 |           |             |             |             |            |
| DOCK7       | DOCK7     | 225.0024888 | 725.3970217 | 477.2457383 |            |
| 704.1857437 |           |             |             |             |            |
| HLA-D0B     | HLA-D0B   | 15.62517283 | 0           | 1.115060136 | 0          |
| SLC28A2     | SLC28A2   | 8.33342551  | 1.760672383 | 10.03554123 |            |
| 3.923040355 |           |             |             |             |            |
| MIR27A      | MIR27A    | 0           | 0           | 1.115060136 | 0          |
| LOC388692   | LOC388692 |             |             | 56.25062219 | 124.127403 |
| 363.5096044 |           | 293.2472665 |             |             |            |
| CD200       | CD200     | 2600.028759 | 2194.678125 | 3071.990675 |            |
| 6032.655305 |           |             |             |             |            |
| MOCS1       | MOCS1     | 29.16698928 | 47.53815434 | 165.0289002 |            |
| 148.0947734 |           |             |             |             |            |
| MMP11       | MMP11     | 8.33342551  | 14.96571525 | 21.18614259 |            |
| 83.36460754 |           |             |             |             |            |
| METTL23     | METTL23   | 1991.688697 | 1807.330201 | 2389.573872 |            |
| 2089.018989 |           |             |             |             |            |
| MTRNR2L10   | MTRNR2L10 |             | 0           | 1.760672383 | 0          |
| ZNF3        | ZNF3      | 2036.480859 | 1806.449865 | 2933.723219 |            |
| 1842.848207 |           |             |             |             |            |
| RPE         | RPE       | 3239.619167 | 3154.244574 | 2382.883511 |            |
| 3048.202356 |           |             |             |             |            |
| CRSP8P      | CRSP8P    | 10.41678189 | 14.08537906 | 8.92048109  |            |
| 4.903800443 |           |             |             |             |            |
| CNTN1       | CNTN1     | 0           | 0           | 1.115060136 | 0          |
| RAB23       | RAB23     | 671.8824317 | 566.9365073 | 544.1493465 |            |

|                 |                 |             |             |             |             |
|-----------------|-----------------|-------------|-------------|-------------|-------------|
| 340.3237508     |                 |             |             |             |             |
| MIR940          | MIR940          | 1.041678189 | 2.641008574 | 0           | 0.980760089 |
| MIR939          | MIR939          | 287.5031801 | 356.5361575 | 201.8258847 |             |
| 296.1895468     |                 |             |             |             |             |
| LOC644961       | LOC644961       |             | 180.2103266 | 214.8020307 |             |
| 386.9258673     | 231.4593809     |             |             |             |             |
| MTERF4          | MTERF4          | 1698.977126 | 1648.869687 | 2473.203382 |             |
| 1951.712576     |                 |             |             |             |             |
| ALG3            | ALG3            | 4727.13562  | 3309.183744 | 3660.742427 |             |
| 4095.65413      |                 |             |             |             |             |
| MIR933          | MIR933          | 5.208390943 | 8.803361914 | 4.460240545 |             |
| 2.942280266     |                 |             |             |             |             |
| MIR215          | MIR215          | 1.041678189 | 0.880336191 | 2.230120273 |             |
| 2.942280266     |                 |             |             |             |             |
| MPDU1           | MPDU1           | 6552.155807 | 4332.134398 | 4191.511052 |             |
| 3533.678599     |                 |             |             |             |             |
| LOC283335       | LOC283335       |             | 1.041678189 | 11.44437049 |             |
| 24.531323       | 24.51900222     |             |             |             |             |
| RCC1            | RCC1            | 7327.164379 | 6185.242081 | 5769.321145 |             |
| 6025.789985     |                 |             |             |             |             |
| C2CD3           | C2CD3           | 1161.47118  | 2322.326873 | 1907.867893 |             |
| 1992.9045       |                 |             |             |             |             |
| CCDC12          | CCDC12          | 3462.538299 | 2852.28926  | 2991.706346 |             |
| 2959.933948     |                 |             |             |             |             |
| ATP6V1G2-DDX39B | ATP6V1G2-DDX39B |             | 3.125034566 | 7.923025723 |             |
| 3.345180409     | 4.903800443     |             |             |             |             |
| RNF7            | RNF7            | 3854.209298 | 3859.393863 | 3417.659318 |             |
| 3551.332281     |                 |             |             |             |             |
| ZNF778          | ZNF778          | 369.795757  | 420.8006995 | 374.6602058 |             |
| 341.3045109     |                 |             |             |             |             |
| TEX264          | TEX264          | 3659.415477 | 3011.630111 | 2038.329929 |             |
| 2580.379793     |                 |             |             |             |             |
| IN080B-WBP1     | IN080B-WBP1     |             | 1229.180263 | 1692.886496 |             |
| 1138.476399     | 1169.066026     |             |             |             |             |
| COLEC11         | COLEC11         | 0           | 2.230120273 | 5.884560532 |             |
| SMARCAD1        | SMARCAD1        |             | 3979.210681 | 3921.897733 |             |
| 3111.01778      | 3711.196176     |             |             |             |             |
| LINC00954       | LINC00954       |             | 31.25034566 | 68.66622293 |             |
| 165.0289002     | 64.73016585     |             |             |             |             |
| DDX11L10        | DDX11L10        |             | 1.041678189 | 2.641008574 | 0           |
|                 | 0.980760089     |             |             |             |             |
| FKBP9P1         | FKBP9P1         | 0           | 0.880336191 | 0           |             |
| PPIEL           | PPIEL           | 80.20922053 | 96.83698106 | 59.09818722 |             |
| 152.0178137     |                 |             |             |             |             |
| CHIAP2          | CHIAP2          | 0           | 6.690360818 | 0           |             |
| API5            | API5            | 21586.6971  | 18073.30201 | 17652.51702 |             |
| 20175.21578     |                 |             |             |             |             |
| MIR3193         | MIR3193         | 1.041678189 | 0           | 0           |             |
| MIR3191         | MIR3191         | 2.083356377 | 7.923025723 | 1.115060136 |             |
| 4.903800443     |                 |             |             |             |             |

|               |               |             |               |               |
|---------------|---------------|-------------|---------------|---------------|
| MIR3190       | MIR3190       | 2.083356377 | 7.923025723   | 1.115060136   |
| 4.903800443   |               |             |               |               |
| CROCCP2       | CROCCP2       | 325.0035949 | 510.594991    | 502.8921215   |
| 866.0111583   |               |             |               |               |
| MINK1         | MINK1         | 1016.677912 | 2508.958146   | 1086.068573   |
| 1371.102604   |               |             |               |               |
| NFATC2        | NFATC2        | 3767.750009 | 7231.961813   | 4752.386301   |
| 4879.281441   |               |             |               |               |
| RASA4B        | RASA4B        | 163.5434756 | 208.6396774   | 181.7548022   |
| 247.1515423   |               |             |               |               |
| LRRC49        | LRRC49        | 5.208390943 | 14.96571525   | 47.94758586   |
| 10.78836098   |               |             |               |               |
| ABCC10        | ABCC10        | 2239.608106 | 2031.81593    | 1573.349852   |
| 2198.864119   |               |             |               |               |
| ZBTB33        | ZBTB33        | 1315.639552 | 1753.629693   | 2075.126914   |
| 1866.386449   |               |             |               |               |
| TRIM26        | TRIM26        | 4.166712755 | 0.880336191   | 2.230120273   |
| 0.980760089   |               |             |               |               |
| LDB3          | LDB3          | 4.166712755 | 5.282017149   | 4.460240545   |
| 15.69216142   |               |             |               |               |
| RAD51         | RAD51         | 6590.6979   | 5625.348263   | 3454.456302   |
| 4301.613749   |               |             |               |               |
| SERPINA10     | SERPINA10     |             | 0 0           | 0 1.961520177 |
| SNRK          | SNRK          | 3587.539682 | 4370.86919    | 4979.858569   |
| 3793.580023   |               |             |               |               |
| ZNF250        | ZNF250        | 323.9619167 | 338.0490975   | 1145.16676    |
| 710.0703042   |               |             |               |               |
| MLKL          | MLKL          | 2407.318294 | 1612.775903   | 1724.998031   |
| 1820.290725   |               |             |               |               |
| PGM1          | PGM1          | 2125.023505 | 2451.736293   | 2581.364215   |
| 3208.06625    |               |             |               |               |
| FAM122B       | FAM122B       | 383.3375734 | 1368.922778   | 496.2017606   |
| 586.494533    |               |             |               |               |
| ZNF419        | ZNF419        | 367.7124006 | 298.4339689   | 454.9445356   |
| 482.5339636   |               |             |               |               |
| DNAH14        | DNAH14        | 16.66685102 | 60.74319721   | 2.230120273   |
| 37.26888337   |               |             |               |               |
| VPS37A        | VPS37A        | 3235.452454 | 2420.924526   | 3018.467789   |
| 2711.801645   |               |             |               |               |
| BBIP1         | BBIP1         | 1111.470627 | 1272.966133   | 2991.706346   |
| 2377.362455   |               |             |               |               |
| CTD-2270F17.1 | CTD-2270F17.1 |             | 0 2.641008574 | 0             |
| 0.980760089   |               |             |               |               |
| SMN2          | SMN2          | 2141.690356 | 1145.317385   | 1977.001622   |
| 1428.967449   |               |             |               |               |
| DCLRE1B       | DCLRE1B       | 2375.02627  | 2238.694935   | 1906.752833   |
| 1778.118041   |               |             |               |               |
| VWA1          | VWA1          | 6.250069132 | 19.36739621   | 8.92048109    |
| 6.865320621   |               |             |               |               |
| FAM129B       | FAM129B       | 433.3381265 | 187.5116088   | 238.6228692   |

|              |              |             |             |             |
|--------------|--------------|-------------|-------------|-------------|
| 34.3266031   |              |             |             |             |
| MED8         | MED8         | 3533.372416 | 3327.670804 | 3057.494894 |
| 3103.124921  |              |             |             |             |
| NPNT         | NPNT         | 1.041678189 | 0           | 0           |
| STX8         | STX8         | 1645.851538 | 1553.793378 | 1222.105909 |
| 1515.274337  |              |             |             |             |
| RFX2         | RFX2         | 708.3411683 | 706.9099617 | 393.6162281 |
| 624.7441765  |              |             |             |             |
| PPT2         | PPT2         | 0           | 0           | 0.980760089 |
| R3HCC1L      | R3HCC1L      | 2623.987357 | 1647.98935  | 2769.809378 |
| 2383.247015  |              |             |             |             |
| P2RY10       | P2RY10       | 5702.146405 | 3806.573692 | 4280.715863 |
| 3621.947007  |              |             |             |             |
| PDE4D        | PDE4D        | 2698.988187 | 4222.092374 | 2294.79376  |
| 2788.300932  |              |             |             |             |
| LINC00877    | LINC00877    |             | 27.08363291 | 27.29042193 |
| 12.2656615   |              | 16.67292151 |             |             |
| LOC100287072 | LOC100287072 |             | 0           | 0.880336191 |
| 3.923040355  |              |             |             | 0           |
| ARFRP1       | ARFRP1       | 3556.289336 | 3170.090625 | 2892.465993 |
| 3377.737745  |              |             |             |             |
| HIGD1B       | HIGD1B       | 46.87551849 | 36.09378385 | 40.14216491 |
| 59.82636541  |              |             |             |             |
| ZMYND11      | ZMYND11      | 2763.572235 | 2778.34102  | 3250.400297 |
| 2545.07243   |              |             |             |             |
| SERPINB8     | SERPINB8     |             | 825.0091254 | 773.8155123 |
| 1001.324002  |              | 1103.3551   |             |             |
| PTPRB        | PTPRB        | 0           | 0           | 0.980760089 |
| ADARB1       | ADARB1       | 1551.058823 | 895.3019067 | 1105.024595 |
| 855.2227973  |              |             |             |             |
| ZNF559       | ZNF559       | 705.2161337 | 499.1506205 | 2071.781733 |
| 1325.98764   |              |             |             |             |
| MTUS1        | MTUS1        | 61.45901313 | 423.4417081 | 140.4975772 |
| 568.8408514  |              |             |             |             |
| SPERT        | SPERT        | 1.041678189 | 0           | 20.07108245 |
| MXI1         | MXI1         | 793.7587798 | 699.8672722 | 3395.358115 |
| 2286.151767  |              |             |             |             |
| ZC3H8        | ZC3H8        | 795.8421362 | 542.2870939 | 1067.11255  |
| 914.0684026  |              |             |             |             |
| NDUFC1       | NDUFC1       | 4355.256507 | 4781.105856 | 3497.943647 |
| 3760.23418   |              |             |             |             |
| NET02        | NET02        | 3991.710819 | 2505.436801 | 1891.141991 |
| 1146.508544  |              |             |             |             |
| STX5         | STX5         | 919.8018406 | 1359.23908  | 1432.852275 |
| 1048.432535  |              |             |             |             |
| RPS6KB1      | RPS6KB1      | 5583.395091 | 4739.730055 | 4279.600803 |
| 4157.442016  |              |             |             |             |
| AHR          | AHR          | 2708.363291 | 2735.204547 | 5343.368173 |
| 3670.985012  |              |             |             |             |
| F8A1         | F8A1         | 1470.849602 | 1508.015896 | 1614.607077 |



|                 |                 |             |               |  |
|-----------------|-----------------|-------------|---------------|--|
| 1854.617328     |                 |             |               |  |
| CLEC2B CLEC2B   | 1286.472563     | 2368.104355 | 3435.50028    |  |
| 2245.940603     |                 |             |               |  |
| CKAP5 CKAP5     | 10829.28645     | 16669.16578 | 9200.361184   |  |
| 10239.13533     |                 |             |               |  |
| PTDSS1 PTDSS1   | 17410.60925     | 10896.80138 | 9579.481631   |  |
| 8579.689256     |                 |             |               |  |
| C19orf66        | C19orf66        | 3232.32742  | 2810.913459   |  |
| 4427.903801     | 3665.100451     |             |               |  |
| PHYH PHYH       | 1239.597045     | 1121.548308 | 1125.095677   |  |
| 1279.891916     |                 |             |               |  |
| PFKFB2 PFKFB2   | 72.91747321     | 90.67462772 | 370.1999652   |  |
| 183.4021366     |                 |             |               |  |
| WRAP53 WRAP53   | 2683.363014     | 1909.449199 | 1603.456476   |  |
| 1691.811153     |                 |             |               |  |
| ZNF528 ZNF528   | 350.0038714     | 228.0070736 | 909.8890712   |  |
| 343.266031      |                 |             |               |  |
| FAM53C FAM53C   | 4704.2187       | 4079.477911 | 4715.589316   |  |
| 4128.999973     |                 |             |               |  |
| SYBU SYBU       | 1.041678189     | 7.042689532 | 75.82408927   |  |
| 26.48052239     |                 |             |               |  |
| VEPH1 VEPH1     | 3.125034566     | 6.16235334  | 5.575300681   |  |
| 2.942280266     |                 |             |               |  |
| APEX1 APEX1     | 9353.228456     | 6781.229683 | 9804.723778   |  |
| 9597.718228     |                 |             |               |  |
| GADD45GIP1      | GADD45GIP1      | 4645.884722 | 3607.617713   |  |
| 3810.160486     | 4190.787859     |             |               |  |
| CCDC97 CCDC97   | 3041.700311     | 2550.333947 | 2518.920848   |  |
| 1891.886211     |                 |             |               |  |
| EMILIN3 EMILIN3 | 0 0.880336191 0 | 0           | 0             |  |
| SRSF8 SRSF8     | 3258.369374     | 2420.924526 | 4791.413406   |  |
| 3811.233705     |                 |             |               |  |
| AOC1 AOC1       | 2.083356377     | 0 0         | 0             |  |
| ABHD10 ABHD10   | 4993.805237     | 3764.317555 | 4241.688758   |  |
| 4926.357925     |                 |             |               |  |
| SHISA5 SHISA5   | 12540.76371     | 9376.460775 | 12219.94403   |  |
| 8751.322271     |                 |             |               |  |
| CALCRL CALCRL   | 9.375103698     | 119.725722  | 15.61084191   |  |
| 34.3266031      |                 |             |               |  |
| PUF60 PUF60     | 21031.48263     | 14329.23219 | 16022.2991    |  |
| 17062.28326     |                 |             |               |  |
| KCNMA1 KCNMA1   | 3.125034566     | 12.32470668 | 25.64638313   |  |
| 38.24964346     |                 |             |               |  |
| RHOBTB2 RHOBTB2 | 590.631533      | 800.225598  | 865.2866657   |  |
| 714.9741046     |                 |             |               |  |
| MSRB3 MSRB3     | 19.79188559     | 22.88874098 | 0 9.807600887 |  |
| SECISBP2L       | SECISBP2L       | 1336.473116 | 1602.211868   |  |
| 1171.928203     | 1040.586454     |             |               |  |
| RIMS1 RIMS1     | 0 0             | 4.460240545 | 0             |  |
| LINC00354       | LINC00354       | 0 0         | 0 0.980760089 |  |

|             |           |             |             |             |
|-------------|-----------|-------------|-------------|-------------|
| GRTP1-AS1   | GRTP1-AS1 | 2.083356377 | 0           | 2.230120273 |
| 4.903800443 |           |             |             |             |
| BLM         | BLM       | 6572.989371 | 7239.004502 | 3269.35632  |
| 4746.878829 |           |             |             |             |
| SH3BGR      | SH3BGR    | 45.8338403  | 36.97412004 | 104.8156528 |
| 78.46080709 |           |             |             |             |
| GEMIN7      | GEMIN7    | 2393.776478 | 1988.679456 | 1741.723933 |
| 1955.635617 |           |             |             |             |
| CASKIN2     | CASKIN2   | 11.45846008 | 66.02521436 | 11.15060136 |
| 42.17268381 |           |             |             |             |
| MAK16       | MAK16     | 6025.066643 | 5068.095454 | 5668.965733 |
| 5866.90685  |           |             |             |             |
| FAM53B      | FAM53B    | 1536.475328 | 2139.216945 | 1804.1673   |
| 385.4387148 |           |             |             |             |
| SLC22A7     | SLC22A7   | 0           | 7.805420954 | 3.923040355 |
|             |           | 0           |             |             |
| AURKAIP1    | AURKAIP1  |             | 7545.916799 | 6320.813855 |
| 5085.789282 |           | 5352.007804 |             |             |
| NFKBIL1     | NFKBIL1   | 56.25062219 | 29.93143051 | 17.84096218 |
| 35.30736319 |           |             |             |             |
| WWP2        | WWP2      | 6164.651521 | 5330.435639 | 5360.094075 |
| 5224.508992 |           |             |             |             |
| SERPINA1    | SERPINA1  | 0           | 3.521344766 | 8.92048109  |
| 16.67292151 |           |             |             |             |
| PRAP1       | PRAP1     | 2.083356377 | 4.401680957 | 2.230120273 |
| 3.923040355 |           |             |             |             |
| UBXN6       | UBXN6     | 117.7096353 | 280.8272451 | 127.1168555 |
| 138.2871725 |           |             |             |             |
| CLCN2       | CLCN2     | 126.0430608 | 133.8111011 | 137.1523968 |
| 137.3064124 |           |             |             |             |
| MIR4444-2   | MIR4444-2 |             | 319.7952039 | 399.6726309 |
| 328.9427402 |           | 325.6123494 |             |             |
| CLIP4       | CLIP4     | 1512.51673  | 1933.218276 | 2715.171432 |
| 2263.594285 |           |             |             |             |
| MIR7851     | MIR7851   | 22.91692015 | 29.93143051 | 27.87650341 |
| 35.30736319 |           |             |             |             |
| ZNF627      | ZNF627    | 406.2544936 | 447.2107853 | 1206.495067 |
| 799.3194723 |           |             |             |             |
| RHOT1       | RHOT1     | 3719.832812 | 3396.337027 | 3037.423811 |
| 3131.566963 |           |             |             |             |
| NEURL1B     | NEURL1B   | 0           | 11.15060136 | 6.865320621 |
|             |           | 0           |             |             |
| CTH         | CTH       | 211.4606723 | 251.7761508 | 265.3843124 |
| 289.3242262 |           |             |             |             |
| DOCK8       | DOCK8     | 10028.23592 | 17712.36417 | 8595.99859  |
| 9306.432481 |           |             |             |             |
| DYNC2LI1    | DYNC2LI1  |             | 514.5890252 | 430.4843976 |
| 488.3963397 |           | 539.4180488 |             |             |
| KIRREL3     | KIRREL3   | 5.208390943 | 0           | 4.460240545 |
|             |           |             | 0           | 0.980760089 |
| PPM1L       | PPM1L     | 35.41705842 | 98.59765344 | 99.24035213 |
| 46.09572417 |           |             |             |             |
| ADAD1       | ADAD1     | 0           | 0           | 0.980760089 |
|             |           | 0           |             |             |

|          |          |             |             |             |             |
|----------|----------|-------------|-------------|-------------|-------------|
| CCL23    | CCL23    | 0           | 1.760672383 | 0           | 0.980760089 |
| UEVLD    | UEVLD    | 1569.80903  | 1031.754016 |             | 1241.061932 |
|          |          | 1060.201656 |             |             |             |
| PCDH15   | PCDH15   | 0           | 0           | 1.115060136 | 1.961520177 |
| TLL11    | TLL11    | 98.95942793 | 93.31563629 |             | 215.2066063 |
|          |          | 84.34536763 |             |             |             |
| PARP9    | PARP9    | 13177.22909 | 7338.482492 |             | 22121.67804 |
|          |          | 10392.1339  |             |             |             |
| STRADA   | STRADA   | 2589.611977 | 2218.447202 |             | 2619.27626  |
|          |          | 2300.863168 |             |             |             |
| ARHGAP4  | ARHGAP4  | 5912.565399 | 6738.093209 |             | 2833.367806 |
|          |          | 5236.278113 |             |             |             |
| SMAD7    | SMAD7    | 863.5512184 | 426.9630528 |             | 828.4896812 |
|          |          | 493.3223246 |             |             |             |
| SCAMP4   | SCAMP4   | 845.8426892 | 1372.444122 |             | 874.2071468 |
|          |          | 928.779804  |             |             |             |
| HSD17B12 | HSD17B12 |             | 3482.330185 |             | 2528.325542 |
|          |          | 2716.286492 | 2328.324451 |             |             |
| BANK1    | BANK1    | 7.291747321 | 2.641008574 | 0           | 12.74988115 |
| PXN      | PXN      | 6834.450596 | 8564.790806 |             | 4285.176104 |
|          |          | 4678.225623 |             |             |             |
| VPRBP    | VPRBP    | 4685.468493 | 5665.843728 |             | 5207.330836 |
|          |          | 5917.906375 |             |             |             |
| NFYC     | NFYC     | 5834.439535 | 4975.660154 |             | 4686.597753 |
|          |          | 4279.056267 |             |             |             |
| ZNF780A  | ZNF780A  | 547.9227273 | 655.8504626 |             | 851.9059441 |
|          |          | 822.8577144 |             |             |             |
| TCF7     | TCF7     | 373.9624697 | 780.8582018 |             | 7041.604761 |
|          |          | 9703.640317 |             |             |             |
| VRK3     | VRK3     | 4171.921146 | 3494.93468  |             | 4001.950829 |
|          |          | 4017.193323 |             |             |             |
| TMBIM1   | TMBIM1   | 8612.595264 | 6629.811858 |             | 7561.222784 |
|          |          | 6359.248415 |             |             |             |
| BAG6     | BAG6     | 0           | 4.401680957 | 7.805420954 | 7.846080709 |
| ASPH     | ASPH     | 390.6293208 | 567.8168435 |             | 669.0360818 |
|          |          | 545.3026093 |             |             |             |
| NOS1     | NOS1     | 0           | 0           | 1.115060136 | 0           |
| DST      | DST      | 244.7943743 | 417.2793547 |             | 185.0999826 |
|          |          | 231.4593809 |             |             |             |
| BMP6     | BMP6     | 1054.178327 | 856.5671143 |             | 779.4270352 |
|          |          | 887.5878802 |             |             |             |
| CXCR5    | CXCR5    | 489.5887487 | 347.7327956 |             | 1151.857121 |
|          |          | 2170.422076 |             |             |             |
| ITPRIPL1 | ITPRIPL1 |             | 3077.117369 |             | 2964.972293 |
|          |          | 1132.901098 | 2274.382646 |             |             |
| RANBP3   | RANBP3   | 371.8791134 | 982.4551896 |             | 452.7144153 |
|          |          | 427.6113987 |             |             |             |
| PLXNB3   | PLXNB3   | 4.166712755 | 3.521344766 |             | 8.92048109  |
|          |          | 0.980760089 |             |             |             |
| CHRNA9   | CHRNA9   | 2.083356377 | 3.521344766 |             | 44.60240545 |

|             |         |             |             |             |
|-------------|---------|-------------|-------------|-------------|
| 5.884560532 |         |             |             |             |
| CSRP2BP     | CSRP2BP | 2468.777307 | 1953.466009 | 2623.736501 |
| 2132.172433 |         |             |             |             |
| CYP2D6      | CYP2D6  | 9.375103698 | 21.12806859 | 16.72590204 |
| 14.71140133 |         |             |             |             |
| PDLIM5      | PDLIM5  | 2094.814837 | 1634.784308 | 2535.64675  |
| 2212.59476  |         |             |             |             |
| CSNK1G3     | CSNK1G3 | 2503.152687 | 1987.79912  | 2579.134095 |
| 3099.20188  |         |             |             |             |
| CDK2AP1     | CDK2AP1 | 4197.9631   | 3995.845973 | 2715.171432 |
| 3776.907101 |         |             |             |             |
| AKAP9       | AKAP9   | 1923.979615 | 1975.474414 | 2637.117222 |
| 2219.460081 |         |             |             |             |
| FAM208A     | FAM208A | 2341.692568 | 4366.46751  | 3067.530435 |
| 3417.948909 |         |             |             |             |
| TAGLN3      | TAGLN3  | 22.91692015 | 22.00840479 | 24.531323   |
| 60.8071255  |         |             |             |             |
| SAP30BP     | SAP30BP | 4211.504917 | 3472.045939 | 3657.397247 |
| 3886.752231 |         |             |             |             |
| TTC22       | TTC22   | 317.7118476 | 399.6726309 | 141.6126373 |
| 295.2087867 |         |             |             |             |
| MRPL1       | MRPL1   | 2027.105755 | 1420.862613 | 1495.295643 |
| 1628.061747 |         |             |             |             |
| PSMG2       | PSMG2   | 5883.39841  | 5872.722733 | 5790.507288 |
| 5213.720631 |         |             |             |             |
| PRDM8       | PRDM8   | 371.8791134 | 2561.778317 | 218.5517867 |
| 701.2434634 |         |             |             |             |
| ANK1        | ANK1    | 414.5879191 | 578.3808778 | 659.0005405 |
| 774.80047   |         |             |             |             |
| USP19       | USP19   | 5396.934696 | 4984.463516 | 6494.110234 |
| 5495.198777 |         |             |             |             |
| SLC35D1     | SLC35D1 | 2372.942914 | 3662.198556 | 1704.926948 |
| 2205.729439 |         |             |             |             |
| SLAMF8      | SLAMF8  | 88.54264604 | 51.0594991  | 123.7716751 |
| 98.07600887 |         |             |             |             |
| KCMF1       | KCMF1   | 4183.379606 | 4453.620792 | 3677.468329 |
| 3484.640595 |         |             |             |             |
| PON2        | PON2    | 621.8818787 | 675.2178588 | 481.7059789 |
| 624.7441765 |         |             |             |             |
| SCG2        | SCG2    | 1.041678189 | 0           | 0           |
| CXCR4       | CXCR4   | 6909.451426 | 7570.891246 | 13250.2596  |
| 9950.79186  |         |             |             |             |
| PAX8        | PAX8    | 34.37538023 | 155.8195059 | 78.05420954 |
| 173.5945357 |         |             |             |             |
| AP1M2       | AP1M2   | 0           | 0           | 1.961520177 |
| LIF         | LIF     | 3537.539129 | 4938.686034 | 2327.130504 |
| 2198.864119 |         |             |             |             |
| NUDT1       | NUDT1   | 3567.747796 | 3678.044608 | 1759.564895 |
| 2488.188345 |         |             |             |             |
| MPG         | MPG     | 2657.321059 | 2591.709748 | 1426.161914 |

|             |             |             |             |             |             |
|-------------|-------------|-------------|-------------|-------------|-------------|
| 2177.287397 |             |             |             |             |             |
| LCT         | LCT         | 30.20866747 | 22.88874098 | 22.30120273 |             |
| 25.49976231 |             |             |             |             |             |
| CHIT1       | CHIT1       | 10.41678189 | 8.803361914 | 0           | 11.76912106 |
| GTF2F1      | GTF2F1      | 4025.044521 | 3390.174673 | 3291.657522 |             |
| 2982.49143  |             |             |             |             |             |
| FGB         | FGB         | 0           | 0           | 1.961520177 |             |
| SLC12A6     | SLC12A6     | 2855.239915 | 3751.992848 | 2776.499739 |             |
| 2830.473616 |             |             |             |             |             |
| MRPL3       | MRPL3       | 14463.70165 | 9857.124336 | 11391.45435 |             |
| 12365.4232  |             |             |             |             |             |
| CRISP2      | CRISP2      | 0           | 0           | 1.961520177 |             |
| MMP2        | MMP2        | 31.25034566 | 0.880336191 | 0           | 0           |
| SPG21       | SPG21       | 7405.290243 | 6076.960729 | 6089.343404 |             |
| 6520.093069 |             |             |             |             |             |
| WDR81       | WDR81       | 1101.053845 | 2324.967882 | 1707.157069 |             |
| 1533.908779 |             |             |             |             |             |
| ZNF587B     | ZNF587B     | 555.2144746 | 636.4830664 | 762.7011332 |             |
| 619.840376  |             |             |             |             |             |
| SLC25A22    | SLC25A22    |             | 2226.066289 | 2192.037117 |             |
| 2220.084731 | 2148.845354 |             |             |             |             |
| ITIH2       | ITIH2       | 0           | 1.760672383 | 0           | 2.942280266 |
| NCEH1       | NCEH1       | 1539.600363 | 1084.574188 | 973.447499  |             |
| 872.8764789 |             |             |             |             |             |
| AFF2        | AFF2        | 11.45846008 | 14.08537906 | 0           | 5.884560532 |
| MEGF6       | MEGF6       | 19.79188559 | 51.93983529 | 97.01023186 |             |
| 163.7869348 |             |             |             |             |             |
| DCTN1       | DCTN1       | 8843.847822 | 9225.923286 | 6826.398154 |             |
| 8083.424651 |             |             |             |             |             |
| ARHGEF1     | ARHGEF1     | 13749.11041 | 15956.97381 | 9232.697928 |             |
| 13827.73649 |             |             |             |             |             |
| CPEB3       | CPEB3       | 238.5443052 | 197.1953069 | 349.0138227 |             |
| 246.1707823 |             |             |             |             |             |
| HDHD1       | HDHD1       | 5208.390943 | 2280.951072 | 2888.005753 |             |
| 1927.193574 |             |             |             |             |             |
| ZNF568      | ZNF568      | 297.919962  | 285.228926  | 703.602946  |             |
| 547.2641295 |             |             |             |             |             |
| SYPL1       | SYPL1       | 2455.235491 | 2191.15678  | 5365.669376 |             |
| 3647.44677  |             |             |             |             |             |
| DISC1       | DISC1       | 150.0016592 | 303.715986  | 223.0120273 |             |
| 295.2087867 |             |             |             |             |             |
| DNAI2       | DNAI2       | 64.5840477  | 65.14487817 | 13.38072164 |             |
| 24.51900222 |             |             |             |             |             |
| UCP3        | UCP3        | 60.41733494 | 56.34151625 | 151.6481785 |             |
| 50.01876452 |             |             |             |             |             |
| CCDC158     | CCDC158     | 0           | 1.760672383 | 0           | 0.980760089 |
| CYB561      | CYB561      | 200.0022122 | 423.4417081 | 870.8619664 |             |
| 863.068878  |             |             |             |             |             |
| VDR         | VDR         | 7195.912928 | 10668.7943  | 5154.92301  |             |
| 7829.407788 |             |             |             |             |             |

|                 |               |               |               |
|-----------------|---------------|---------------|---------------|
| MYBL1 MYBL1     | 239.5859834   | 77.46958485   | 424.8379119   |
| 263.8244639     |               |               |               |
| IL18BP IL18BP   | 345.8371586   | 286.9895984   | 352.3590031   |
| 287.362706      |               |               |               |
| C2orf81 C2orf81 | 29.16698928   | 29.93143051   | 129.3469758   |
| 69.6339663      |               |               |               |
| SPHK1 SPHK1     | 419.79631     | 416.3990186   | 536.3439255   |
| 639.4555778     |               |               |               |
| PLBD2 PLBD2     | 514.5890252   | 688.4229017   | 469.4403174   |
| 562.9562909     |               |               |               |
| FBX028 FBX028   | 2222.941255   | 1726.339271   | 2401.839534   |
| 2117.461031     |               |               |               |
| GPR156 GPR156   | 0 3.521344766 | 0             | 0             |
| 0TUD3 0TUD3     | 189.5854303   | 223.6053926   | 258.6939516   |
| 205.9596186     |               |               |               |
| ABCB8 ABCB8     | 2486.485836   | 2348.736959   | 1693.776347   |
| 2170.422076     |               |               |               |
| LOC101060389    | LOC101060389  | 42.70880574   | 54.58084387   |
| 51.29276627     | 65.71092594   |               |               |
| C1RL-AS1        | C1RL-AS1      | 193.7521431   | 448.0911214   |
| 176.1795015     | 282.4589055   |               |               |
| C6orf52 C6orf52 | 135.4181645   | 77.46958485   | 216.3216664   |
| 86.3068878      |               |               |               |
| ZNF487 ZNF487   | 81.25089872   | 49.29882672   | 128.2319157   |
| 61.78788559     |               |               |               |
| POP4 POP4       | 8174.048747   | 5485.374809   | 5497.246472   |
| 5443.218492     |               |               |               |
| PSG10P PSG10P   | 0 0           | 1.115060136   | 0             |
| LINC00661       | LINC00661     | 0 1.760672383 | 0 0           |
| ABHD11-AS1      | ABHD11-AS1    | 17.70852921   | 7.042689532   |
| 5.575300681     | 13.73064124   |               |               |
| EFCAB2 EFCAB2   | 83.3342551    | 117.9650497   | 64.6734879    |
| 116.7104506     |               |               |               |
| PDCD4-AS1       | PDCD4-AS1     | 57.29230038   | 108.2813515   |
| 124.8867353     | 137.3064124   |               |               |
| LOC100268168    | LOC100268168  | 12.50013826   | 4.401680957   |
| 25.64638313     | 12.74988115   |               |               |
| MIR3918 MIR3918 | 401.0461026   | 313.3996842   | 423.7228518   |
| 456.0534412     |               |               |               |
| KLRAP1 KLRAP1   | 21.87524196   | 45.77748195   | 76.9391494    |
| 58.84560532     |               |               |               |
| MIR744 MIR744   | 0 0.880336191 | 6.690360818   | 0.980760089   |
| CTNND2 CTNND2   | 1.041678189   | 1.760672383   | 0 10.78836098 |
| ZNF415 ZNF415   | 16.66685102   | 0.880336191   | 148.3029981   |
| 46.09572417     |               |               |               |
| SCG3 SCG3       | 0 0           | 5.575300681   | 0             |
| PRKAB2 PRKAB2   | 365.6290442   | 478.022552    | 594.3270526   |
| 604.1482146     |               |               |               |
| MGAT1 MGAT1     | 8450.093467   | 6745.135899   | 9155.758779   |
| 7307.643421     |               |               |               |

|            |            |             |             |             |             |   |
|------------|------------|-------------|-------------|-------------|-------------|---|
| REPS2      | REPS2      | 0           | 0           | 7.805420954 | 7.846080709 |   |
| BUB3       | BUB3       | 27723.22331 |             | 21738.14158 | 21560.80279 |   |
|            |            | 22580.03952 |             |             |             |   |
| MCOLN2     | MCOLN2     | 1105.220558 |             | 1403.255889 | 1015.819784 |   |
|            |            | 791.4733916 |             |             |             |   |
| PHRF1      | PHRF1      | 4155.254295 |             | 5658.801039 | 4838.245931 |   |
|            |            | 4427.15104  |             |             |             |   |
| DOCK6      | DOCK6      | 5.208390943 |             | 2.641008574 | 33.45180409 |   |
|            |            | 43.1534439  |             |             |             |   |
| TTN        | TTN        | 1345.84822  |             | 1211.342599 | 1638.02334  |   |
|            |            | 1458.390252 |             |             |             |   |
| PTPN2      | PTPN2      | 5738.605142 |             | 4862.977122 | 4753.501361 |   |
|            |            | 5241.181914 |             |             |             |   |
| SPHAR      | SPHAR      | 193.7521431 |             | 220.9643841 | 175.0644414 |   |
|            |            | 229.4978607 |             |             |             |   |
| GLRX3      | GLRX3      | 7832.378301 |             | 5466.887749 | 5691.266935 |   |
|            |            | 6001.270983 |             |             |             |   |
| RPP21      | RPP21      | 120.8346699 | 0           | 157.2234792 | 0           |   |
| ZNF613     | ZNF613     | 662.507328  |             | 500.0309567 | 835.1800421 |   |
|            |            | 666.9168603 |             |             |             |   |
| PPP2R5E    | PPP2R5E    | 3539.622485 |             | 3743.189486 | 3522.47497  |   |
|            |            | 3150.201405 |             |             |             |   |
| SNORA59B   | SNORA59B   |             |             | 4.166712755 | 4.401680957 |   |
|            |            | 5.575300681 | 4.903800443 |             |             |   |
| ZNF658B    | ZNF658B    | 2.083356377 |             | 2.641008574 | 1.115060136 |   |
|            |            | 4.903800443 |             |             |             |   |
| LHFPL3-AS2 | LHFPL3-AS2 |             |             | 4.166712755 | 7.923025723 | 0 |
|            |            | 0           |             |             |             |   |
| AKAP14     | AKAP14     | 0           | 4.401680957 | 16.72590204 | 0           |   |
| TMEM30B    | TMEM30B    | 80.20922053 |             | 56.34151625 | 447.1391146 |   |
|            |            | 253.0361029 |             |             |             |   |
| PRKCZ      | PRKCZ      | 430.2130919 |             | 383.8265795 | 883.1276279 |   |
|            |            | 719.8779051 |             |             |             |   |
| PIKFYVE    | PIKFYVE    | 726.0496975 |             | 2486.949741 | 1399.400471 |   |
|            |            | 1465.255572 |             |             |             |   |
| CASS4      | CASS4      | 325.0035949 |             | 257.0581679 | 309.9867179 |   |
|            |            | 284.4204257 |             |             |             |   |
| C10orf2    | C10orf2    | 911.4684151 |             | 976.2928363 | 1444.002876 |   |
|            |            | 1273.026595 |             |             |             |   |
| RNF166     | RNF166     | 2608.362185 |             | 2880.460018 | 1587.845634 |   |
|            |            | 2072.346067 |             |             |             |   |
| SLC23A2    | SLC23A2    | 2126.065183 |             | 2140.977618 | 1724.998031 |   |
|            |            | 1893.847731 |             |             |             |   |
| CHST12     | CHST12     | 1978.14688  |             | 1532.665309 | 943.3408753 |   |
|            |            | 665.9361002 |             |             |             |   |
| CHCHD1     | CHCHD1     | 2409.40165  |             | 3070.612636 | 2066.206433 |   |
|            |            | 2230.248442 |             |             |             |   |
| TRIM7      | TRIM7      | 29.16698928 |             | 44.89714576 | 22.30120273 |   |
|            |            | 52.96104479 |             |             |             |   |
| ETV6       | ETV6       | 2151.06546  |             | 4753.815434 | 2819.987085 |   |

|             |             |             |             |             |             |
|-------------|-------------|-------------|-------------|-------------|-------------|
| 3481.698315 |             |             |             |             |             |
| GRTP1       | GRTP1       | 8.33342551  | 2.641008574 | 14.49578177 |             |
| 27.46128248 |             |             |             |             |             |
| DLX4        | DLX4        | 0           | 8.803361914 | 0           | 0           |
| FUT5        | FUT5        | 0           | 2.641008574 | 21.18614259 | 0.980760089 |
| JAK3        | JAK3        | 13701.19322 | 19157.8762  | 13737.54088 |             |
| 18937.49655 |             |             |             |             |             |
| BRD2        | BRD2        | 186.4603958 | 180.4689192 | 233.0475685 |             |
| 205.9596186 |             |             |             |             |             |
| GBF1        | GBF1        | 5351.100855 | 7242.525847 | 5248.588061 |             |
| 5000.895692 |             |             |             |             |             |
| CFL1        | CFL1        | 90585.37697 | 98956.83061 | 51845.8361  |             |
| 64616.39768 |             |             |             |             |             |
| SCARB2      | SCARB2      | 846.8843674 | 1209.581927 | 1703.811888 |             |
| 969.9717277 |             |             |             |             |             |
| HSPA1L      | HSPA1L      | 16.66685102 | 14.96571525 | 22.30120273 |             |
| 12.74988115 |             |             |             |             |             |
| PEX16       | PEX16       | 1842.728716 | 1339.871683 | 2080.702214 |             |
| 1624.138707 |             |             |             |             |             |
| RLBP1       | RLBP1       | 0           | 0           | 6.690360818 | 0           |
| PITX2       | PITX2       | 0           | 0           | 6.690360818 | 0           |
| KAT8        | KAT8        | 1043.761545 | 1719.296582 | 2027.179328 |             |
| 1702.599514 |             |             |             |             |             |
| HCG4B       | HCG4B       | 34.37538023 | 16.72638764 | 33.45180409 |             |
| 48.05724434 |             |             |             |             |             |
| MAGED1      | MAGED1      | 3755.24987  | 4312.767002 | 3448.881001 |             |
| 3995.616601 |             |             |             |             |             |
| C16orf59    | C16orf59    |             | 1416.682337 | 1110.984274 |             |
| 611.0529547 | 1021.952012 |             |             |             |             |
| FGD2        | FGD2        | 189.5854303 | 44.89714576 | 85.85963049 |             |
| 17.6536816  |             |             |             |             |             |
| DBF4B       | DBF4B       | 419.79631   | 811.6699685 | 254.2337111 |             |
| 383.4771947 |             |             |             |             |             |
| ANXA11      | ANXA11      | 15806.42484 | 15314.32839 | 12818.73133 |             |
| 14278.88613 |             |             |             |             |             |
| WDFY4       | WDFY4       | 16.66685102 | 45.77748195 | 44.60240545 |             |
| 50.99952461 |             |             |             |             |             |
| TRPM3       | TRPM3       | 1.041678189 | 0           | 0           | 0           |
| GADD45B     | GADD45B     | 3269.827834 | 1422.623285 | 5197.295295 |             |
| 2328.324451 |             |             |             |             |             |
| RSL1D1      | RSL1D1      | 12542.84707 | 8955.660075 | 12955.88372 |             |
| 12054.52225 |             |             |             |             |             |
| TRUB2       | TRUB2       | 4641.718009 | 2821.477494 | 3911.630958 |             |
| 3867.13703  |             |             |             |             |             |
| NBEA        | NBEA        | 10.41678189 | 55.46118006 | 90.31987104 |             |
| 65.71092594 |             |             |             |             |             |
| FN1         | FN1         | 65.62572589 | 80.99092961 | 94.78011158 |             |
| 60.8071255  |             |             |             |             |             |
| SPC24       | SPC24       | 421.8796664 | 470.0995262 | 139.382517  |             |
| 207.9211388 |             |             |             |             |             |



|             |           |             |             |             |
|-------------|-----------|-------------|-------------|-------------|
| VPS36       | VPS36     | 3612.539958 | 3165.688944 | 2999.511767 |
| 3144.316844 |           |             |             |             |
| MRS2P2      | MRS2P2    | 36.4587366  | 45.77748195 | 50.17770613 |
| 28.44204257 |           |             |             |             |
| LINC01278   | LINC01278 |             | 276.04472   | 324.8440546 |
| 439.3336937 |           | 523.7258873 |             |             |
| FTSJ1       | FTSJ1     | 6167.776555 | 4578.628532 | 5020.000733 |
| 5679.581673 |           |             |             |             |
| WAPAL       | WAPAL     | 10448.03223 | 8693.31989  | 9030.872044 |
| 8664.034623 |           |             |             |             |
| CDT1        | CDT1      | 3044.825346 | 3699.172676 | 1736.148632 |
| 2346.958892 |           |             |             |             |
| SMIM19      | SMIM19    | 1642.726504 | 1746.587004 | 2114.154018 |
| 2031.154144 |           |             |             |             |
| FAM83F      | FAM83F    | 6.250069132 | 7.042689532 | 31.22168382 |
| 52.96104479 |           |             |             |             |
| EVI5        | EVI5      | 917.7184842 | 1424.383958 | 1432.852275 |
| 3278.680976 |           |             |             |             |
| C1RL        | C1RL      | 94.79271517 | 196.3149707 | 100.3554123 |
| 125.5372913 |           |             |             |             |
| CREB3       | CREB3     | 3883.376287 | 2980.818344 | 4401.142358 |
| 4049.558406 |           |             |             |             |
| CAP1        | CAP1      | 68578.88355 | 70424.25431 | 36495.91826 |
| 47254.00183 |           |             |             |             |
| GON4L       | GON4L     | 3030.241851 | 3531.028464 | 3263.781019 |
| 3313.98834  |           |             |             |             |
| POLR2F      | POLR2F    | 4160.462686 | 3409.542069 | 3397.588235 |
| 3282.604017 |           |             |             |             |
| PHLDA1      | PHLDA1    | 8696.971197 | 7921.265051 | 4465.815846 |
| 9064.184739 |           |             |             |             |
| SLC35B2     | SLC35B2   | 4430.257337 | 3748.471503 | 2844.518408 |
| 3115.874802 |           |             |             |             |
| BMP8A       | BMP8A     | 68.75076045 | 107.4010154 | 65.78854804 |
| 112.7874102 |           |             |             |             |
| UBXN11      | UBXN11    | 13079.31134 | 13238.49565 | 7012.613197 |
| 8199.154341 |           |             |             |             |
| KANSL1      | KANSL1    | 292.711571  | 552.8511282 | 560.8752485 |
| 401.1308763 |           |             |             |             |
| SLAMF7      | SLAMF7    | 758.3417214 | 786.140219  | 1603.456476 |
| 701.2434634 |           |             |             |             |
| TRMT10C     | TRMT10C   | 2795.864258 | 2698.230427 | 4035.402633 |
| 3904.405913 |           |             |             |             |
| WRAP73      | WRAP73    | 2541.69478  | 2403.317803 | 2031.639568 |
| 2598.033475 |           |             |             |             |
| COG1        | COG1      | 3700.040926 | 2450.855957 | 4090.04058  |
| 3020.741073 |           |             |             |             |
| HID1        | HID1      | 2.083356377 | 16.72638764 | 296.6059962 |
| 254.9976231 |           |             |             |             |
| NDUFAF5     | NDUFAF5   | 770.8418596 | 743.8840818 | 434.8734531 |
| 666.9168603 |           |             |             |             |

|             |          |             |             |             |             |
|-------------|----------|-------------|-------------|-------------|-------------|
| EMR1        | EMR1     | 915.6351279 | 0.880336191 | 621.0884959 |             |
| 38.24964346 |          |             |             |             |             |
| A2ML1       | A2ML1    | 0           | 0           | 5.884560532 |             |
| ZNF789      | ZNF789   | 421.8796664 | 431.3647338 | 277.6499739 |             |
| 476.6494031 |          |             |             |             |             |
| INSC        | INSC     | 0           | 4.401680957 | 4.460240545 | 1.961520177 |
| GH1         | GH1      | 1.041678189 | 0           | 8.92048109  | 3.923040355 |
| TMEM62      | TMEM62   | 1265.638999 | 1157.642092 | 1102.794475 |             |
| 824.8192346 |          |             |             |             |             |
| TMEM134     | TMEM134  | 1065.636787 | 1271.20546  | 1238.831811 |             |
| 1531.947259 |          |             |             |             |             |
| GRIN1       | GRIN1    | 0           | 0           | 3.345180409 | 0           |
| ENPP5       | ENPP5    | 2.083356377 | 3.521344766 | 84.74457036 |             |
| 65.71092594 |          |             |             |             |             |
| COA7        | COA7     | 1466.68289  | 1100.420239 | 1519.826966 |             |
| 1377.967925 |          |             |             |             |             |
| C5orf42     | C5orf42  | 357.2956187 | 608.3123083 | 349.0138227 |             |
| 407.9961969 |          |             |             |             |             |
| TMEM132B    | TMEM132B |             | 0           | 0           | 3.345180409 |
| C2orf48     | C2orf48  | 218.7524196 | 367.980528  | 107.0457731 | 0           |
| 233.4209011 |          |             |             |             |             |
| NOM1        | NOM1     | 1166.679571 | 1197.25722  | 1196.459526 |             |
| 1235.757712 |          |             |             |             |             |
| CTNBL1      | CTNBL1   | 6883.409471 | 5212.47059  | 4933.026043 |             |
| 5507.948658 |          |             |             |             |             |
| N4BP1       | N4BP1    | 4526.09173  | 4402.561293 | 5071.2935   |             |
| 3243.373613 |          |             |             |             |             |
| CPNE1       | CPNE1    | 10991.78825 | 6993.390705 | 12820.96145 |             |
| 8562.035574 |          |             |             |             |             |
| DHX36       | DHX36    | 1966.68842  | 2247.498297 | 2534.53169  |             |
| 2106.67267  |          |             |             |             |             |
| CC2D2A      | CC2D2A   | 2.083356377 | 3.521344766 | 13.38072164 |             |
| 6.865320621 |          |             |             |             |             |
| SRPRB       | SRPRB    | 6067.775449 | 4076.836903 | 5302.110948 |             |
| 4852.800919 |          |             |             |             |             |
| RAP2C       | RAP2C    | 2065.647848 | 2295.036451 | 1922.363675 |             |
| 1990.94298  |          |             |             |             |             |
| HMHB1       | HMHB1    | 25.00027653 | 39.61512861 | 16.72590204 |             |
| 15.69216142 |          |             |             |             |             |
| CCNB1IP1    | CCNB1IP1 |             | 426.0463792 | 491.2275948 |             |
| 469.4403174 |          |             |             |             |             |
| G6PC2       | G6PC2    | 1.041678189 | 0           | 0           | 0           |
| DEDD        | DEDD     | 4441.715797 | 3337.354502 | 3659.627367 |             |
| 4121.153893 |          |             |             |             |             |
| KAT2A       | KAT2A    | 752.0916522 | 1111.86461  | 825.1445008 |             |
| 903.2800417 |          |             |             |             |             |
| ZBTB80S     | ZBTB80S  | 2386.48473  | 2060.867024 | 1940.204637 |             |
| 1763.406639 |          |             |             |             |             |
| DUS4L       | DUS4L    | 407.2961718 | 419.0400271 | 247.5433503 |             |
| 468.8033224 |          |             |             |             |             |

|              |              |             |             |             |
|--------------|--------------|-------------|-------------|-------------|
| RAB21        | RAB21        | 2941.699205 | 3758.155201 | 2983.900925 |
| 2470.534663  |              |             |             |             |
| LOC101926963 | LOC101926963 |             | 183.3353612 | 287.8699346 |
| 147.187938   | 339.3429907  |             |             |             |
| MUC1         | MUC1         | 58.33397857 | 100.3583258 | 53.52288654 |
| 19.61520177  |              |             |             |             |
| GPR35        | GPR35        | 135.4181645 | 95.95664487 | 123.7716751 |
| 127.4988115  |              |             |             |             |
| PRMT1        | PRMT1        | 16414.7649  | 11719.03538 | 13845.70171 |
| 15571.52793  |              |             |             |             |
| DDX19A       | DDX19A       | 4607.342629 | 3811.855709 | 3990.800228 |
| 4472.266004  |              |             |             |             |
| LRRC48       | LRRC48       | 41.66712755 | 46.65781815 | 93.66505145 |
| 43.1534439   |              |             |             |             |
| TBC1D9B      | TBC1D9B      | 4413.590486 | 5278.495804 | 4809.254368 |
| 5674.677873  |              |             |             |             |
| CLIP3        | CLIP3        | 208.3356377 | 183.990264  | 89.2048109  |
| 182.4213765  |              |             |             |             |
| PPP4R4       | PPP4R4       | 1.041678189 | 13.20504287 | 50.17770613 |
| 75.51852683  |              |             |             |             |
| SEZ6L        | SEZ6L        | 0           | 0           | 0.980760089 |
| TRAK2        | TRAK2        | 4939.637971 | 3423.627449 | 3784.514102 |
| 2990.33751   |              |             |             |             |
| PCDHGA5      | PCDHGA5      | 4.166712755 | 4.401680957 | 33.45180409 |
| 10.78836098  |              |             |             |             |
| ABCC6        | ABCC6        | 1.041678189 | 5.282017149 | 20.07108245 |
| 4.903800443  |              |             |             |             |
| C3orf84      | C3orf84      | 0           | 0.880336191 | 0           |
| ZNF506       | ZNF506       | 501.0472088 | 556.372473  | 1888.911871 |
| 1367.179564  |              |             |             |             |
| PAK3         | PAK3         | 79.16754234 | 20.2477324  | 25.64638313 |
| 73.55700665  |              |             |             |             |
| AGPAT1       | AGPAT1       | 70.83411683 | 176.9475745 | 50.17770613 |
| 102.9798093  |              |             |             |             |
| FARP2        | FARP2        | 715.6329156 | 702.5082808 | 565.3354891 |
| 669.8591406  |              |             |             |             |
| PRDX4        | PRDX4        | 2930.240745 | 2970.25431  | 3367.481612 |
| 3976.98216   |              |             |             |             |
| ST6GALNAC2   | ST6GALNAC2   |             | 15.62517283 | 7.042689532 |
| 55.75300681  | 45.11496408  |             |             |             |
| DENND3       | DENND3       | 1730.227471 | 2064.388369 | 596.5571729 |
| 1071.970777  |              |             |             |             |
| BTBD3        | BTBD3        | 272.9196854 | 354.7754851 | 176.1795015 |
| 338.3622306  |              |             |             |             |
| PPRC1        | PPRC1        | 5356.309246 | 5443.118672 | 5897.553061 |
| 7399.834869  |              |             |             |             |
| C9orf9       | C9orf9       | 43.75048393 | 100.3583258 | 61.32830749 |
| 84.34536763  |              |             |             |             |
| NDRG4        | NDRG4        | 55.208944   | 70.42689532 | 74.70902913 |
| 109.8451299  |              |             |             |             |

|              |              |             |             |             |
|--------------|--------------|-------------|-------------|-------------|
| OTUB2        | OTUB2        | 857.3011493 | 790.5418999 | 332.2879206 |
| 371.7080736  |              |             |             |             |
| C15orf40     | C15orf40     |             | 2786.489155 | 1969.31206  |
| 2696.215409  | 1937.001175  |             |             |             |
| KCTD1        | KCTD1        | 8.33342551  | 18.48706002 | 6.690360818 |
| 11.76912106  |              |             |             |             |
| TRIM46       | TRIM46       | 271.8780073 | 293.1519517 | 146.0728779 |
| 204.9788585  |              |             |             |             |
| PRKACB       | PRKACB       | 4608.384307 | 5243.282356 | 5695.727176 |
| 4658.610421  |              |             |             |             |
| CHN1         | CHN1         | 282.2947891 | 194.5542983 | 259.8090118 |
| 469.7840825  |              |             |             |             |
| SORCS1       | SORCS1       | 0           | 0.880336191 | 2.230120273 |
|              |              |             |             | 0           |
| GYPC         | GYPC         | 4410.465451 | 5329.555303 | 3156.735246 |
| 3990.712801  |              |             |             |             |
| ENC1         | ENC1         | 46.87551849 | 191.0329535 | 17.84096218 |
| 119.6527308  |              |             |             |             |
| RPAP3        | RPAP3        | 3345.870342 | 2368.984691 | 2899.156354 |
| 2631.379318  |              |             |             |             |
| TRMT10A      | TRMT10A      | 739.591514  | 667.2948331 | 496.2017606 |
| 524.7066474  |              |             |             |             |
| HADH         | HADH         | 3463.579977 | 3338.234838 | 3190.18705  |
| 3598.408765  |              |             |             |             |
| LOC100505915 | LOC100505915 |             | 26.04195472 | 31.69210289 |
| 42.37228518  | 42.17268381  |             |             |             |
| SPIN3        | SPIN3        | 272.9196854 | 308.9980032 | 502.8921215 |
| 745.3776674  |              |             |             |             |
| GTF2IRD2B    | GTF2IRD2B    |             | 130.2097736 | 63.38420578 |
| 330.0578003  | 171.6330155  |             |             |             |
| RAP1GDS1     | RAP1GDS1     |             | 6090.692369 | 5849.833992 |
| 4309.707427  | 4458.535363  |             |             |             |
| C14orf132    | C14orf132    |             | 6.250069132 | 49.29882672 |
| 69.13372845  | 100.037529   |             |             |             |
| PCBP2        | PCBP2        | 2907.323825 | 3784.565287 | 3380.862333 |
| 3081.548199  |              |             |             |             |
| LEPROTL1     | LEPROTL1     |             | 8785.513843 | 9276.982785 |
| 15628.68287  | 10339.17285  |             |             |             |
| THSD7B       | THSD7B       | 0           | 6.690360818 | 0.980760089 |
|              |              | 0           |             |             |
| FAM110A      | FAM110A      | 1125.012444 | 860.9687952 | 690.2222243 |
| 676.7244612  |              |             |             |             |
| PHTF2        | PHTF2        | 8455.301858 | 4119.09304  | 4058.818896 |
| 2919.722784  |              |             |             |             |
| BCOR         | BCOR         | 1780.228024 | 2913.032457 | 2334.935925 |
| 2375.400935  |              |             |             |             |
| NATD1        | NATD1        | 66.66740408 | 231.5284183 | 402.5367092 |
| 298.151067   |              |             |             |             |
| SEC63        | SEC63        | 2866.698375 | 3686.84797  | 3155.620186 |
| 3505.236557  |              |             |             |             |
| NUTM2F       | NUTM2F       | 0           | 1.760672383 | 0           |
|              |              |             |             | 1.961520177 |
| GORASP2      | GORASP2      | 9833.442101 | 7887.812275 | 10459.26408 |

|                 |               |             |             |             |
|-----------------|---------------|-------------|-------------|-------------|
| 9132.837946     |               |             |             |             |
| SLC25A13        | SLC25A13      |             | 651.0488679 | 772.0548399 |
| 559.7601884     | 792.4541516   |             |             |             |
| GCNT1 GCNT1     | 2065.647848   |             | 1278.24815  | 1504.216124 |
| 1050.394055     |               |             |             |             |
| OCM OCM         | 2.083356377   |             | 2.641008574 | 12.2656615  |
| 3.923040355     |               |             |             |             |
| SH3D19 SH3D19   | 1.041678189   |             | 13.20504287 | 27.87650341 |
| 11.76912106     |               |             |             |             |
| ZC3H12B ZC3H12B | 70.83411683   |             | 78.34992104 | 126.0017954 |
| 99.05676896     |               |             |             |             |
| ZCCHC11 ZCCHC11 | 1353.139967   |             | 1750.108349 | 2331.590745 |
| 1980.154619     |               |             |             |             |
| NT5DC2 NT5DC2   | 892.7182077   |             | 1478.964802 | 748.2053514 |
| 1045.490255     |               |             |             |             |
| MEIS2 MEIS2     | 0 4.401680957 | 0           | 0           | 0           |
| GFM2 GFM2       | 5563.603206   |             | 4660.499797 | 3875.949034 |
| 5103.875501     |               |             |             |             |
| RPLP0 RPLP0     | 38942.09741   |             | 38261.17155 | 38249.90785 |
| 40698.6014      |               |             |             |             |
| COPS7B COPS7B   | 3470.871725   |             | 3012.510447 | 2591.399757 |
| 2991.31827      |               |             |             |             |
| SLC46A2 SLC46A2 | 0 0.880336191 | 27.87650341 | 2.942280266 |             |
| DGCR8 DGCR8     | 1489.59981    |             | 1354.837399 | 1234.371571 |
| 770.8774297     |               |             |             |             |
| FAM122C FAM122C | 402.0877808   |             | 532.6033958 | 461.6348964 |
| 461.9380018     |               |             |             |             |
| LRG1 LRG1       | 179.1686485   |             | 80.99092961 | 91.43493117 |
| 89.24916807     |               |             |             |             |
| RPL39L RPL39L   | 1001.052739   |             | 1020.309646 | 617.7433155 |
| 615.9173357     |               |             |             |             |
| ATP8B3 ATP8B3   | 353.128906    |             | 279.0665727 | 88.08975076 |
| 152.0178137     |               |             |             |             |
| DYDC1 DYDC1     | 0 0           |             | 2.230120273 | 0           |
| SYNRG SYNRG     | 5412.559868   |             | 5895.611474 | 5434.803104 |
| 5777.657682     |               |             |             |             |
| HHAT HHAT       | 28.12531109   |             | 22.88874098 | 104.8156528 |
| 107.8836098     |               |             |             |             |
| CELF5 CELF5     | 0 0           |             | 1.115060136 | 0.980760089 |
| SYNCRIP SYNCRIP | 18078.32496   |             | 13625.84357 | 13925.98604 |
| 15406.76023     |               |             |             |             |
| RABL2B RABL2B   | 904.1766678   |             | 764.1318142 | 1300.160119 |
| 1216.14251      |               |             |             |             |
| MANSC4 MANSC4   | 1.041678189   | 0 0         | 1.961520177 |             |
| ZFAT ZFAT       | 230.2108797   |             | 317.8013651 | 249.7734705 |
| 388.3809951     |               |             |             |             |
| LOC649330       | LOC649330     |             | 2.083356377 | 0 0         |
| 0.980760089     |               |             |             |             |
| KDM4C KDM4C     | 2072.939596   |             | 2096.080472 | 3783.399042 |
| 3174.720407     |               |             |             |             |

|             |          |             |             |             |             |             |
|-------------|----------|-------------|-------------|-------------|-------------|-------------|
| KDM5D       | KDM5D    | 0           | 2997.544732 | 0           | 3150.201405 |             |
| SPOP        | SPOP     | 4369.840002 |             | 3891.085966 | 5424.767563 |             |
| 4851.820159 |          |             |             |             |             |             |
| ERAP1       | ERAP1    | 5576.103344 |             | 5133.240332 | 5971.14703  |             |
| 5309.83512  |          |             |             |             |             |             |
| STRBP       | STRBP    | 3756.291548 |             | 3159.526591 | 3140.009344 |             |
| 3960.309238 |          |             |             |             |             |             |
| HCRTR1      | HCRTR1   | 0           | 0           | 0           | 0.980760089 |             |
| RPL36A      | RPL36A   | 4557.342076 |             | 6082.242747 | 7556.762543 |             |
| 6785.879053 |          |             |             |             |             |             |
| IL4R        | IL4R     | 7548.000155 |             | 7635.155788 | 10556.27431 |             |
| 10296.01941 |          |             |             |             |             |             |
| C10orf10    | C10orf10 |             |             | 48.95887487 | 58.98252483 |             |
| 98.12529199 |          | 65.71092594 |             |             |             |             |
| PITX3       | PITX3    | 1.041678189 |             | 2.641008574 | 3.345180409 |             |
| 9.807600887 |          |             |             |             |             |             |
| HEXB        | HEXB     | 6721.949352 |             | 5568.126411 | 5207.330836 |             |
| 5122.509943 |          |             |             |             |             |             |
| HSD17B1     | HSD17B1  | 146.8766246 |             | 345.091787  | 263.1541922 |             |
| 214.7864594 |          |             |             |             |             |             |
| GTF2H4      | GTF2H4   | 11.45846008 |             | 0           | 16.72590204 | 0           |
| SLC26A3     | SLC26A3  | 1.041678189 |             | 0           | 4.460240545 | 0.980760089 |
| ASGR1       | ASGR1    | 18.7502074  |             | 4.401680957 | 16.72590204 |             |
| 27.46128248 |          |             |             |             |             |             |
| EDNRB       | EDNRB    | 3.125034566 |             | 1.760672383 | 0           | 0           |
| SLC26A2     | SLC26A2  | 889.5931731 |             | 1081.052843 | 1121.750497 |             |
| 867.9726785 |          |             |             |             |             |             |
| SERPING1    | SERPING1 |             |             | 5.208390943 | 0           | 0           |
| BTK         | BTK      | 14.58349464 |             | 8.803361914 | 18.95602232 | 0           |
| 1.961520177 |          |             |             |             |             |             |
| LCAT        | LCAT     | 40.62544936 |             | 95.07630868 | 113.7361339 |             |
| 57.86484523 |          |             |             |             |             |             |
| ACBD5       | ACBD5    | 2582.32023  |             | 2127.772575 | 1697.121527 |             |
| 1694.753433 |          |             |             |             |             |             |
| LAMB2       | LAMB2    | 1.041678189 |             | 0.880336191 | 2.230120273 | 0           |
| RAB3IP      | RAB3IP   | 1265.638999 |             | 993.0192239 | 1401.630591 |             |
| 1503.505216 |          |             |             |             |             |             |
| GRIN3B      | GRIN3B   | 592.7148894 |             | 603.0302911 | 483.9360991 |             |
| 595.3213738 |          |             |             |             |             |             |
| GLIPR1L2    | GLIPR1L2 |             |             | 15.62517283 | 8.803361914 |             |
| 42.37228518 |          | 32.36508293 |             |             |             |             |
| JAM2        | JAM2     | 11.45846008 |             | 46.65781815 | 63.55842777 |             |
| 59.82636541 |          |             |             |             |             |             |
| CCL3L3      | CCL3L3   | 52.08390943 |             | 91.55496391 | 114.851194  |             |
| 254.9976231 |          |             |             |             |             |             |
| ZBTB44      | ZBTB44   | 209.3773159 |             | 589.8252483 | 487.2812795 |             |
| 421.7268381 |          |             |             |             |             |             |
| DNASE1L3    | DNASE1L3 |             |             | 0           | 0.880336191 | 0           |
| 1.961520177 |          |             |             |             |             |             |
| NEIL1       | NEIL1    | 11.45846008 |             | 20.2477324  | 31.22168382 |             |

|                |                |             |             |             |
|----------------|----------------|-------------|-------------|-------------|
| 43.1534439     |                |             |             |             |
| MPP5           | MPP5           | 733.3414448 | 786.140219  | 418.1475511 |
| 458.0149614    |                |             |             |             |
| PPP1R12C       | PPP1R12C       |             | 525.0058071 | 821.3536666 |
| 433.758393     |                | 469.7840825 |             |             |
| IDNK           | IDNK           | 520.8390943 | 455.133811  | 413.6873106 |
| 442.3228       |                |             |             |             |
| 4-Sep          | 4-Sep          | 13.54181645 | 14.96571525 | 8.92048109  |
| 12.74988115    |                |             |             |             |
| SEN3-EIF4A1    | SEN3-EIF4A1    |             | 33793.08212 | 26749.89551 |
| 30021.87911    |                | 30477.11976 |             |             |
| CMTM3          | CMTM3          | 7022.994348 | 5597.177505 | 5133.736867 |
| 5744.311839    |                |             |             |             |
| MRPS14         | MRPS14         | 3797.958676 | 3600.575023 | 3891.559876 |
| 3454.237032    |                |             |             |             |
| CLEC2D         | CLEC2D         | 28950.32022 | 24633.56731 | 24803.39767 |
| 24550.38654    |                |             |             |             |
| CES2           | CES2           | 2437.526962 | 2905.109432 | 2990.591285 |
| 3576.832043    |                |             |             |             |
| LEMD1          | LEMD1          | 2.083356377 | 8.803361914 | 0           |
| 0SBPL9         | 0SBPL9         | 5484.435663 | 5064.574109 | 10.78836098 |
| 5624.659109    |                |             |             | 4815.944729 |
| EEF1E1-BLOC1S5 | EEF1E1-BLOC1S5 |             | 7530.291626 | 5602.459522 |
| 7300.298712    |                | 6460.266704 |             |             |
| BLOC1S5-TXNDC5 | BLOC1S5-TXNDC5 |             | 12081.38363 | 9521.716247 |
| 8856.922662    |                | 10060.63699 |             |             |
| SUMF2          | SUMF2          | 6282.361156 | 4075.956566 | 5406.926601 |
| 4149.595935    |                |             |             |             |
| RBM18          | RBM18          | 4074.003396 | 2915.673466 | 3437.7304   |
| 2688.263403    |                |             |             |             |
| PIGQ           | PIGQ           | 1243.763757 | 1453.435052 | 1200.919767 |
| 1363.256523    |                |             |             |             |
| ZNF628         | ZNF628         | 4.166712755 | 30.8117667  | 1.115060136 |
| 7.846080709    |                |             |             |             |
| GTF2I          | GTF2I          | 5320.892188 | 4622.645341 | 4269.565262 |
| 4740.013509    |                |             |             |             |
| KCNJ12         | KCNJ12         | 4.166712755 | 1.760672383 | 0           |
| CERK           | CERK           | 7159.454191 | 8017.221695 | 0           |
| 7470.449595    |                |             |             | 4016.446611 |
| GCK            | GCK            | 28.12531109 | 5.282017149 | 84.74457036 |
| 82.38384745    |                |             |             |             |
| HK1            | HK1            | 27541.97131 | 22765.49391 | 19917.20415 |
| 26665.88605    |                |             |             |             |
| MYLK           | MYLK           | 43.75048393 | 56.34151625 | 31.22168382 |
| 51.9802847     |                |             |             |             |
| MTRR           | MTRR           | 5417.768259 | 4782.866528 | 4284.061044 |
| 4278.075507    |                |             |             |             |
| UPF3B          | UPF3B          | 1303.139414 | 1296.73521  | 1287.894457 |
| 1108.2589      |                |             |             |             |
| TBPL2          | TBPL2          | 0           | 0.880336191 | 0           |

|             |             |             |             |             |
|-------------|-------------|-------------|-------------|-------------|
| CACUL1      | CACUL1      | 2373.984592 | 2363.702674 | 2564.638313 |
| 2210.63324  |             |             |             |             |
| RUSC1       | RUSC1       | 1102.095524 | 1082.813515 | 999.0938821 |
| 1018.028972 |             |             |             |             |
| NDE1        | NDE1        | 3887.543    | 3413.94375  | 3121.053321 |
| 2851.069578 |             |             |             |             |
| GSTT2       | GSTT2       | 8.33342551  | 0           | 0           |
| SCGB1A1     | SCGB1A1     | 33.33370204 | 11.44437049 | 3.345180409 |
| 1.961520177 |             |             |             |             |
| PSMD11      | PSMD11      | 19973.13759 | 13543.09197 | 13784.3734  |
| 13103.93554 |             |             |             |             |
| NAT9        | NAT9        | 1253.138861 | 934.0366991 | 1311.31072  |
| 1483.890014 |             |             |             |             |
| ENSA        | ENSA        | 3776.083434 | 6093.687117 | 4107.881542 |
| 4942.050087 |             |             |             |             |
| TCF12       | TCF12       | 3668.790581 | 4783.746864 | 3754.407479 |
| 3859.290949 |             |             |             |             |
| TMEM177     | TMEM177     | 1341.681507 | 907.6266134 | 1137.361339 |
| 1261.257474 |             |             |             |             |
| XRCC3       | XRCC3       | 2048.980997 | 2053.824335 | 1382.674569 |
| 1642.773149 |             |             |             |             |
| SLC45A4     | SLC45A4     | 284.3781455 | 398.7922947 | 431.5282727 |
| 299.131827  |             |             |             |             |
| TOX3        | TOX3        | 0           | 0           | 0.980760089 |
| SAMD12      | SAMD12      | 45.8338403  | 14.96571525 | 46.83252572 |
| 34.3266031  |             |             |             |             |
| TOX2        | TOX2        | 343.7538023 | 1498.332198 | 129.3469758 |
| 316.7855086 |             |             |             |             |
| GPSM1       | GPSM1       | 122.9180263 | 188.391945  | 103.7005927 |
| 254.016863  |             |             |             |             |
| CPSF7       | CPSF7       | 1400.015486 | 3422.747112 | 1724.998031 |
| 1585.889063 |             |             |             |             |
| CHID1       | CHID1       | 3828.167343 | 2721.119168 | 3821.311087 |
| 3736.695938 |             |             |             |             |
| VGLL4       | VGLL4       | 1492.724844 | 2604.91479  | 1324.691442 |
| 2151.787635 |             |             |             |             |
| TUBGCP5     | TUBGCP5     | 1990.647019 | 1507.13556  | 1940.204637 |
| 1577.062223 |             |             |             |             |
| RPS15A      | RPS15A      | 10301.15561 | 14160.20764 | 12623.5958  |
| 11174.78045 |             |             |             |             |
| TMEM254     | TMEM254     | 991.6776356 | 869.7721571 | 1049.271588 |
| 1212.21947  |             |             |             |             |
| LINC00957   | LINC00957   |             | 70.83411683 | 94.19597248 |
| 59.09818722 | 58.84560532 |             |             |             |
| SGK3        | SGK3        | 338.5454113 | 242.0924526 | 2021.604027 |
| 779.7042705 |             |             |             |             |
| GRK4        | GRK4        | 54.16726581 | 32.57243908 | 53.52288654 |
| 50.99952461 |             |             |             |             |
| CAPN3       | CAPN3       | 55.208944   | 50.17916291 | 49.062646   |
| 72.57624656 |             |             |             |             |



|             |             |             |             |             |
|-------------|-------------|-------------|-------------|-------------|
| PFDN2       | PFDN2       | 3268.786156 | 2802.990434 | 3098.752119 |
| 3044.279315 |             |             |             |             |
| HBQ1        | HBQ1        | 2.083356377 | 9.683698106 | 3.345180409 |
| 2.942280266 |             |             |             |             |
| ZNF26       | ZNF26       | 18.7502074  | 21.12806859 | 32.33674395 |
| 26.48052239 |             |             |             |             |
| NCAPH2      | NCAPH2      | 10534.49152 | 8877.310154 | 7634.816753 |
| 8054.001848 |             |             |             |             |
| RANBP3L     | RANBP3L     | 0           | 0.880336191 | 0           |
| ENPP7       | ENPP7       | 0           | 2.641008574 | 0           |
| BHLHA15     | BHLHA15     | 3.125034566 | 8.803361914 | 6.690360818 |
| 10.78836098 |             |             |             |             |
| TRAPPC6B    | TRAPPC6B    |             | 2243.774818 | 2424.445871 |
| 2053.940771 | 2177.287397 |             |             |             |
| VHL         | VHL         | 2882.323548 | 4165.750858 | 1711.617309 |
| 2405.804498 |             |             |             |             |
| C21orf33    | C21orf33    |             | 3675.04065  | 3994.085301 |
| 2754.198537 | 3835.752707 |             |             |             |
| PSMD13      | PSMD13      | 21851.28336 | 13785.18442 | 12974.83975 |
| 13200.05003 |             |             |             |             |
| LCE1E       | LCE1E       | 0           | 5.575300681 | 1.961520177 |
| LCE1B       | LCE1B       | 0           | 0.880336191 | 13.38072164 |
| SLC25A44    | SLC25A44    |             | 5230.266185 | 4122.614385 |
| 4908.49472  | 4408.516599 |             |             |             |
| IP013       | IP013       | 1947.938213 | 1928.816595 | 1609.031777 |
| 1737.906877 |             |             |             |             |
| RGN         | RGN         | 0           | 3.345180409 | 0           |
| IREB2       | IREB2       | 2532.319677 | 4421.92869  | 2836.712987 |
| 3335.565062 |             |             |             |             |
| PRKAR2A     | PRKAR2A     | 1138.55426  | 750.0464351 | 733.7095697 |
| 780.6850306 |             |             |             |             |
| ORC1        | ORC1        | 4682.343458 | 4340.93776  | 2244.616054 |
| 3160.009006 |             |             |             |             |
| USP40       | USP40       | 421.8796664 | 449.8517938 | 588.7517519 |
| 367.7850333 |             |             |             |             |
| NT5C1A      | NT5C1A      | 23.95859834 | 4.401680957 | 20.07108245 |
| 0.980760089 |             |             |             |             |
| KPNA6       | KPNA6       | 5467.768812 | 6630.692194 | 5604.292245 |
| 5126.432983 |             |             |             |             |
| SATB1       | SATB1       | 12210.55173 | 13960.37132 | 21869.67445 |
| 31335.28483 |             |             |             |             |
| POP5        | POP5        | 2270.858451 | 2254.540986 | 1770.715496 |
| 1994.86602  |             |             |             |             |
| TWF2        | TWF2        | 7377.164932 | 6461.667645 | 5249.703122 |
| 6687.803045 |             |             |             |             |
| XIRP1       | XIRP1       | 134.3764863 | 8.803361914 | 304.4114172 |
| 142.2102129 |             |             |             |             |
| SASS6       | SASS6       | 1020.844625 | 1221.026298 | 675.7264426 |
| 937.6066448 |             |             |             |             |
| DNAJC21     | DNAJC21     | 3593.789751 | 3227.312478 | 3678.58339  |

|              |              |             |             |             |
|--------------|--------------|-------------|-------------|-------------|
| 3592.524205  |              |             |             |             |
| STEAP3       | STEAP3       | 23.95859834 | 7.923025723 | 6.690360818 |
| 0.980760089  |              |             |             |             |
| EI24         | EI24         | 4641.718009 | 2857.571277 | 4753.501361 |
| 3703.350095  |              |             |             |             |
| EYA3         | EYA3         | 1472.932959 | 2237.814599 | 1449.578177 |
| 1382.871725  |              |             |             |             |
| TMEM9B       | TMEM9B       | 4960.471535 | 3310.06408  | 5103.630244 |
| 3797.503063  |              |             |             |             |
| SIK3         | SIK3         | 1660.435033 | 2654.213617 | 3189.07199  |
| 3189.431808  |              |             |             |             |
| FLVCR1       | FLVCR1       | 795.8421362 | 872.4131657 | 492.8565802 |
| 505.0914457  |              |             |             |             |
| TPD52L2      | TPD52L2      | 8544.886182 | 6047.029299 | 6905.567424 |
| 7013.415394  |              |             |             |             |
| GSG1         | GSG1         | 4.166712755 | 4.401680957 | 14.49578177 |
| 1.961520177  |              |             |             |             |
| C4orf19      | C4orf19      | 43.75048393 | 40.49546481 | 13.38072164 |
| 54.92256497  |              |             |             |             |
| PRSS1        | PRSS1        | 1.041678189 | 5.282017149 | 10.03554123 |
| 2.942280266  |              |             |             |             |
| BAZ2A        | BAZ2A        | 2985.449689 | 5634.151625 | 4620.809205 |
| 3832.810427  |              |             |             |             |
| IST1         | IST1         | 10325.11421 | 8134.306409 | 10807.16284 |
| 9776.216564  |              |             |             |             |
| MATN3        | MATN3        | 0           | 0           | 0.980760089 |
| COPA         | COPA         | 26097.16366 | 23361.48151 | 20474.73422 |
| 23238.12954  |              |             |             |             |
| HACL1        | HACL1        | 3493.788645 | 2397.155449 | 3190.18705  |
| 3092.33656   |              |             |             |             |
| SLC27A5      | SLC27A5      | 293.7532492 | 324.8440546 | 294.375876  |
| 332.4776701  |              |             |             |             |
| CIB2         | CIB2         | 101.0427843 | 100.3583258 | 71.36384872 |
| 70.61472638  |              |             |             |             |
| CHAT         | CHAT         | 0           | 0           | 0.980760089 |
| COG5         | COG5         | 3077.117369 | 2876.938674 | 6003.483774 |
| 4901.838923  |              |             |             |             |
| ART5         | ART5         | 0           | 0           | 1.961520177 |
| ZNF536       | ZNF536       | 0           | 0           | 0.980760089 |
| ARHGAP32     | ARHGAP32     |             | 8.33342551  | 113.5633687 |
| 108.1608332  |              | 175.5560559 |             |             |
| LIN7C        | LIN7C        | 4887.554061 | 4315.40801  | 5073.52362  |
| 4567.399733  |              |             |             |             |
| IFT140       | IFT140       | 229.1692015 | 349.493468  | 303.2963571 |
| 496.2646049  |              |             |             |             |
| NLGN4Y       | NLGN4Y       | 0           | 48.41849053 | 0           |
| BDNF         | BDNF         | 13.54181645 | 0.880336191 | 15.61084191 |
| 14.71140133  |              |             |             |             |
| LOC100505478 | LOC100505478 |             | 40.62544936 | 16.72638764 |
| 25.64638313  |              | 19.61520177 |             |             |

|             |             |             |             |             |
|-------------|-------------|-------------|-------------|-------------|
| CCDC169     | CCDC169     | 6.250069132 | 8.803361914 | 2.230120273 |
| 7.846080709 |             |             |             |             |
| ACSL6       | ACSL6       | 493.7554614 | 265.8615298 | 590.9818722 |
| 345.2275512 |             |             |             |             |
| GEMIN2      | GEMIN2      | 1156.262789 | 1108.343265 | 1010.244483 |
| 1030.778853 |             |             |             |             |
| TLK1        | TLK1        | 2151.06546  | 4892.908552 | 2690.640109 |
| 4323.190471 |             |             |             |             |
| COPS2       | COPS2       | 2616.69561  | 2491.351422 | 2727.437093 |
| 2489.169105 |             |             |             |             |
| KIAA0319    | KIAA0319    |             | 14.58349464 | 4.401680957 |
| 46.83252572 | 0.980760089 |             |             |             |
| SNORD7      | SNORD7      | 0           | 2.641008574 | 0           |
| 5.884560532 |             |             |             |             |
| IGBP1P1     | IGBP1P1     | 9.375103698 | 3.521344766 | 34.56686422 |
| 20.59596186 |             |             |             |             |
| NNAT        | NNAT        | 20.83356377 | 16.72638764 | 22.30120273 |
| 22.55748204 |             |             |             |             |
| PPP2R2B     | PPP2R2B     | 59.37565676 | 250.0154784 | 51.29276627 |
| 163.7869348 |             |             |             |             |
| UROC1       | UROC1       | 1.041678189 | 0           | 0           |
|             |             |             |             | 0           |
| KCNH8       | KCNH8       | 0           | 0           | 0.980760089 |
|             |             |             |             |             |
| MLF2        | MLF2        | 10250.11338 | 7961.760515 | 9950.796656 |
| 10339.17285 |             |             |             |             |
| IFI35       | IFI35       | 7905.295774 | 4691.311564 | 7438.566169 |
| 4214.326101 |             |             |             |             |
| VCL         | VCL         | 2580.236873 | 2947.365569 | 2043.90523  |
| 2334.209011 |             |             |             |             |
| BMPR1B      | BMPR1B      | 0           | 4.401680957 | 0           |
|             |             |             |             | 0           |
| BMP4        | BMP4        | 3.125034566 | 0.880336191 | 53.52288654 |
| 0.980760089 |             |             |             |             |
| BCL2L1      | BCL2L1      | 3278.16126  | 3252.842227 | 3443.305701 |
| 2471.515423 |             |             |             |             |
| ST3GAL3     | ST3GAL3     | 327.0869513 | 365.3395194 | 264.2692523 |
| 480.5724434 |             |             |             |             |
| EBLN3       | EBLN3       | 1270.84739  | 1393.572191 | 2090.737756 |
| 1758.502839 |             |             |             |             |
| RPL18       | RPL18       | 13658.48441 | 13332.69162 | 15091.22388 |
| 13866.96689 |             |             |             |             |
| IFF01       | IFF01       | 1543.767076 | 1461.358078 | 942.2258151 |
| 1158.277665 |             |             |             |             |
| FLJ27354    | FLJ27354    |             | 86.45928966 | 168.1442126 |
| 88.08975076 | 107.8836098 |             |             |             |
| PWAR5       | PWAR5       | 17.70852921 | 20.2477324  | 69.13372845 |
| 14.71140133 |             |             |             |             |
| PBX3        | PBX3        | 270.8363291 | 381.1855709 | 424.8379119 |
| 317.7662687 |             |             |             |             |
| HSD17B7P2   | HSD17B7P2   |             | 116.6679571 | 253.5368231 |
| 212.976486  | 264.8052239 |             |             |             |
| PPIE        | PPIE        | 4077.128431 | 3941.265129 | 3801.240005 |
| 4591.918735 |             |             |             |             |

|               |               |             |             |             |
|---------------|---------------|-------------|-------------|-------------|
| CARS          | CARS          | 8719.888118 | 6009.174843 | 8806.744956 |
| 6273.922287   |               |             |             |             |
| CMPK2         | CMPK2         | 3479.20515  | 784.3795466 | 9848.211123 |
| 1854.617328   |               |             |             |             |
| WDR92         | WDR92         | 1189.596491 | 963.9681296 | 837.4101623 |
| 995.47149     |               |             |             |             |
| GPX2          | GPX2          | 8.33342551  | 3.521344766 | 0           |
| FAM166B       | FAM166B       | 7.291747321 | 4.401680957 | 6.865320621 |
| 3.923040355   |               |             |             | 2.230120273 |
| NUDT16P1      | NUDT16P1      |             | 16.66685102 | 37.85445623 |
| 7.805420954   |               |             |             |             |
| TCAM1P        | TCAM1P        | 12.50013826 | 0           | 17.84096218 |
| MMP23A        | MMP23A        | 0           | 0           | 0.980760089 |
| FABP5P3       | FABP5P3       | 9.375103698 | 0.880336191 | 2.942280266 |
| 0.980760089   |               |             |             | 15.61084191 |
| LOC441601     | LOC441601     |             | 7.291747321 | 0           |
| 0             |               |             |             | 2.230120273 |
| SCART1        | SCART1        | 9.375103698 | 30.8117667  | 0           |
| SGCA          | SGCA          | 1.041678189 | 0.880336191 | 35.30736319 |
| ADA           | ADA           | 4262.547148 | 7258.371898 | 13.38072164 |
| 4539.93845    |               |             |             | 0           |
| KCNAB2        | KCNAB2        | 3055.242127 | 9798.141811 | 2998.396706 |
| 3779.849382   |               |             |             |             |
| JMJD7-PLA2G4B | JMJD7-PLA2G4B |             | 426.0463792 | 591.5859206 |
| 550.8397073   |               |             |             |             |
| CYP21A2       | CYP21A2       | 0           | 0.880336191 | 0           |
| MAG           | MAG           | 3.125034566 | 0           | 0.980760089 |
| ATP5G3        | ATP5G3        | 25177.36182 | 28155.79241 | 16605.47555 |
| 21377.62765   |               |             |             |             |
| YJEFN3        | YJEFN3        | 59.37565676 | 77.46958485 | 17.84096218 |
| 60.8071255    |               |             |             |             |
| PFDN1         | PFDN1         | 7356.331369 | 5556.68204  | 4914.070021 |
| 5071.510419   |               |             |             |             |
| NUBP1         | NUBP1         | 2709.404969 | 2174.430393 | 1789.671519 |
| 1864.424929   |               |             |             |             |
| APBA2         | APBA2         | 27.08363291 | 82.751602   | 1651.404062 |
| 1441.71733    |               |             |             |             |
| KCTD9         | KCTD9         | 1087.512029 | 1107.462929 | 671.266202  |
| 794.4156718   |               |             |             |             |
| DDX60         | DDX60         | 3958.377117 | 1971.953069 | 13123.14274 |
| 4289.844628   |               |             |             |             |
| RXRB          | RXRB          | 13.54181645 | 7.923025723 | 14.49578177 |
| 20.59596186   |               |             |             |             |
| LUZP1         | LUZP1         | 1280.222494 | 1566.998421 | 1655.864302 |
| 1942.885736   |               |             |             |             |
| RPL34         | RPL34         | 7260.496975 | 8955.660075 | 13831.20593 |
| 11026.68568   |               |             |             |             |
| FBX021        | FBX021        | 3145.86813  | 2795.067408 | 4447.974884 |
| 3944.617077   |               |             |             |             |
| LOC100288798  | LOC100288798  |             | 75.00082959 | 147.016144  |

|                 |               |             |               |   |  |
|-----------------|---------------|-------------|---------------|---|--|
| 15.61084191     | 67.67244612   |             |               |   |  |
| FAM111A FAM111A | 7101.120212   | 7131.603487 | 5385.740458   |   |  |
| 5507.948658     |               |             |               |   |  |
| FADS3 FADS3     | 128.1264172   | 103.8796706 | 250.8885307   |   |  |
| 209.882659      |               |             |               |   |  |
| MBD6 MBD6       | 58.33397857   | 283.4682536 | 57.98312709   |   |  |
| 80.42232727     |               |             |               |   |  |
| EGFEM1P EGFEM1P | 0 5.282017149 | 0           | 0             |   |  |
| LOC392196       | LOC392196     | 0 0         | 2.230120273   | 0 |  |
| CCDC152 CCDC152 | 221.8774542   | 420.8006995 | 405.8818896   |   |  |
| 525.6874075     |               |             |               |   |  |
| CLGN CLGN       | 15.62517283   | 58.98252483 | 0 14.71140133 |   |  |
| KIAA0391        | KIAA0391      | 4117.75388  | 4039.862783   |   |  |
| 3008.432248     | 4050.539166   |             |               |   |  |
| WSCD2 WSCD2     | 2.083356377   | 0 0         | 6.865320621   |   |  |
| MAPRE2 MAPRE2   | 7612.584203   | 9198.632864 | 8143.284175   |   |  |
| 11738.7175      |               |             |               |   |  |
| AGER AGER       | 0 0           | 2.230120273 | 0             |   |  |
| CFAP61 CFAP61   | 0 5.282017149 | 7.805420954 | 0             |   |  |
| GNG13 GNG13     | 112.5012444   | 132.0504287 | 59.09818722   |   |  |
| 132.402612      |               |             |               |   |  |
| ZNF581 ZNF581   | 918.7601624   | 716.5936598 | 1064.88243    |   |  |
| 832.6653153     |               |             |               |   |  |
| ZHX1 ZHX1       | 2894.823686   | 2408.59982  | 2819.987085   |   |  |
| 2719.647726     |               |             |               |   |  |
| MTCP1 MTCP1     | 347.920515    | 406.7153204 | 373.5451456   |   |  |
| 407.9961969     |               |             |               |   |  |
| FBR5 FBR5       | 351.0455496   | 888.2592172 | 443.7939342   |   |  |
| 402.1116364     |               |             |               |   |  |
| ZNF284 ZNF284   | 26.04195472   | 21.12806859 | 158.3385393   |   |  |
| 49.03800443     |               |             |               |   |  |
| SMAP1 SMAP1     | 2204.191047   | 1728.099944 | 2359.467248   |   |  |
| 1668.272911     |               |             |               |   |  |
| NAE1 NAE1       | 8473.010387   | 7781.291596 | 6578.854804   |   |  |
| 8056.944128     |               |             |               |   |  |
| USP9X USP9X     | 4147.962547   | 8635.217702 | 6798.521651   |   |  |
| 5829.637967     |               |             |               |   |  |
| ESRP1 ESRP1     | 0 4.401680957 | 5.575300681 | 0             |   |  |
| 10-Mar 10-Mar   | 0 0           | 24.531323   | 4.903800443   |   |  |
| TSC2 TSC2       | 3039.616955   | 4242.340107 | 3084.256337   |   |  |
| 3665.100451     |               |             |               |   |  |
| C16orf46        | C16orf46      | 96.87607155 | 66.02521436   |   |  |
| 143.8427576     | 74.53776674   |             |               |   |  |
| TMEM170B        | TMEM170B      | 82.29257691 | 154.9391697   |   |  |
| 150.5331184     | 183.4021366   |             |               |   |  |
| MOB4 MOB4       | 4861.512107   | 4063.63186  | 3987.455047   |   |  |
| 3876.944631     |               |             |               |   |  |
| MED7 MED7       | 1193.763204   | 1181.411169 | 1426.161914   |   |  |
| 1414.256048     |               |             |               |   |  |
| TMEM55B TMEM55B | 1827.103543   | 2145.379299 | 3103.212359   |   |  |

|             |             |             |             |             |             |
|-------------|-------------|-------------|-------------|-------------|-------------|
| 2107.653431 |             |             |             |             |             |
| CAPN8       | CAPN8       | 2.083356377 | 0           | 6.690360818 | 0           |
| ZNF707      | ZNF707      | 255.2111562 | 213.0413583 | 317.7921388 |             |
| 206.9403787 |             |             |             |             |             |
| MUTYH       | MUTYH       | 1886.4792   | 1427.024966 | 1969.196201 |             |
| 1825.194525 |             |             |             |             |             |
| C11orf88    | C11orf88    | 2.083356377 | 0.880336191 |             |             |
| 3.345180409 | 0           |             |             |             |             |
| PLXNB1      | PLXNB1      | 7.291747321 | 113.5633687 | 66.90360818 |             |
| 59.82636541 |             |             |             |             |             |
| CLNS1A      | CLNS1A      | 7130.287202 | 5956.354671 | 6873.23068  |             |
| 6929.070026 |             |             |             |             |             |
| CREB3L4     | CREB3L4     | 339.5870895 | 452.4928024 | 320.0222591 |             |
| 478.6109233 |             |             |             |             |             |
| C5          | C5          | 38.54209298 | 77.46958485 | 173.9493813 |             |
| 100.037529  |             |             |             |             |             |
| GGCT        | GGCT        | 3236.494132 | 2912.152121 | 2695.100349 |             |
| 2672.571242 |             |             |             |             |             |
| TREM1       | TREM1       | 0           | 0.880336191 | 4.460240545 | 4.903800443 |
| MAP4K4      | MAP4K4      | 4370.88168  | 3713.258055 | 6364.763258 |             |
| 4399.689758 |             |             |             |             |             |
| TRIM2       | TRIM2       | 25.00027653 | 15.84605145 | 143.8427576 |             |
| 62.76864567 |             |             |             |             |             |
| ZNF529      | ZNF529      | 366.6707224 | 455.133811  | 956.7215969 |             |
| 682.6090217 |             |             |             |             |             |
| APH1B       | APH1B       | 356.2539405 | 607.4319721 | 987.9432807 |             |
| 1196.527308 |             |             |             |             |             |
| TNFSF13B    | TNFSF13B    | 459.3800812 | 237.6907717 |             |             |
| 4164.749609 | 1090.605219 |             |             |             |             |
| NCR3        | NCR3        | 100.0011061 | 20.2477324  | 65.78854804 |             |
| 19.61520177 |             |             |             |             |             |
| COR07       | COR07       | 9561.564094 | 9985.653419 | 5293.190467 |             |
| 6321.979532 |             |             |             |             |             |
| DCAF5       | DCAF5       | 3282.327973 | 4075.956566 | 4505.958011 |             |
| 4025.039404 |             |             |             |             |             |
| PAFAH1B2    | PAFAH1B2    | 2392.734799 | 3582.087963 |             |             |
| 2667.223846 | 2784.377892 |             |             |             |             |
| CGA         | CGA         | 16.66685102 | 3.521344766 | 0           | 0           |
| ITGA10      | ITGA10      | 40.62544936 | 38.73479242 | 17.84096218 |             |
| 21.57672195 |             |             |             |             |             |
| CD3E        | CD3E        | 16163.72045 | 18001.11444 | 15789.25153 |             |
| 15170.39705 |             |             |             |             |             |
| FGF9        | FGF9        | 2.083356377 | 4.401680957 | 211.8614259 |             |
| 115.7296905 |             |             |             |             |             |
| CTSB        | CTSB        | 24056.51609 | 20816.42958 | 15648.75395 |             |
| 25406.5901  |             |             |             |             |             |
| GPRASP1     | GPRASP1     | 10.41678189 | 22.00840479 | 1311.31072  |             |
| 804.2232727 |             |             |             |             |             |
| GYG1        | GYG1        | 4285.464068 | 4526.688696 | 2664.993726 |             |
| 2617.648677 |             |             |             |             |             |

|              |              |             |             |             |             |   |
|--------------|--------------|-------------|-------------|-------------|-------------|---|
| RABIF        | RABIF        | 2718.780073 | 2021.251896 | 2110.808838 |             |   |
| 1641.792388  |              |             |             |             |             |   |
| PLIN2        | PLIN2        | 7693.835102 | 6515.368153 | 6285.593988 |             |   |
| 6937.896867  |              |             |             |             |             |   |
| PAM          | PAM          | 3407.329355 | 2702.632108 | 2182.172687 |             |   |
| 4409.497359  |              |             |             |             |             |   |
| UBASH3B      | UBASH3B      | 4637.551296 | 3955.350508 | 2486.584104 |             |   |
| 2293.997847  |              |             |             |             |             |   |
| TRIM5        | TRIM5        | 612.506775  | 1209.581927 | 1487.490222 |             |   |
| 1523.120418  |              |             |             |             |             |   |
| ANTXR2       | ANTXR2       | 9218.85197  | 11962.00817 | 2633.772042 |             |   |
| 3524.851759  |              |             |             |             |             |   |
| SPAG16       | SPAG16       | 440.6298738 | 575.7398692 | 421.4927315 |             |   |
| 701.2434634  |              |             |             |             |             |   |
| IGFLR1       | IGFLR1       | 3136.493026 | 3202.663064 | 2489.929284 |             |   |
| 3139.413044  |              |             |             |             |             |   |
| CTNND1       | CTNND1       | 171.8769011 | 250.0154784 | 320.0222591 |             |   |
| 364.842753   |              |             |             |             |             |   |
| CPSF3L       | CPSF3L       | 6975.077152 | 5261.769416 | 5254.163362 |             |   |
| 6096.404711  |              |             |             |             |             |   |
| APITD1-CORT  | APITD1-CORT  |             | 1255.222217 | 1303.7779   |             |   |
| 869.7469063  | 841.4921561  |             |             |             |             |   |
| LOC102724933 | LOC102724933 |             | 1.041678189 | 0           | 0           | 0 |
| ARMCX6       | ARMCX6       | 583.3397857 | 625.0386959 | 636.6993378 |             |   |
| 672.8014208  |              |             |             |             |             |   |
| PCNA-AS1     | PCNA-AS1     |             | 10221.98807 | 8430.099369 |             |   |
| 8196.807062  | 7155.625607  |             |             |             |             |   |
| ATXN3        | ATXN3        | 1264.597321 | 1387.409838 | 1665.899844 |             |   |
| 1454.467211  |              |             |             |             |             |   |
| ARCN1        | ARCN1        | 19748.1351  | 17057.39405 | 16462.74785 |             |   |
| 17739.98848  |              |             |             |             |             |   |
| PFKM         | PFKM         | 1663.560067 | 1369.803114 | 1416.126373 |             |   |
| 1763.406639  |              |             |             |             |             |   |
| CDH23        | CDH23        | 11.45846008 | 41.375801   | 181.7548022 |             |   |
| 81.40308736  |              |             |             |             |             |   |
| TAX1BP1      | TAX1BP1      | 8433.426616 | 8251.391122 | 11776.1501  |             |   |
| 10644.18924  |              |             |             |             |             |   |
| GDF5         | GDF5         | 0           | 0.880336191 | 0           | 0           |   |
| ITGA2B       | ITGA2B       | 0           | 11.44437049 | 20.07108245 | 6.865320621 |   |
| ZFYVE28      | ZFYVE28      | 413.5462409 | 782.6188742 | 392.501168  |             |   |
| 770.8774297  |              |             |             |             |             |   |
| DENND1B      | DENND1B      | 2830.239639 | 2423.565535 | 1827.583563 |             |   |
| 1614.331106  |              |             |             |             |             |   |
| ACADM        | ACADM        | 6143.817957 | 6236.30158  | 4941.946524 |             |   |
| 6481.843426  |              |             |             |             |             |   |
| SIPA1L3      | SIPA1L3      | 172.9185793 | 331.8867442 | 255.3487712 |             |   |
| 195.1712576  |              |             |             |             |             |   |
| OTOA         | OTOA         | 2.083356377 | 0           | 18.95602232 | 0.980760089 |   |
| NEDD8-MDP1   | NEDD8-MDP1   |             | 7126.120489 | 5464.24674  |             |   |
| 5677.886214  | 5783.542243  |             |             |             |             |   |

|             |             |             |             |             |
|-------------|-------------|-------------|-------------|-------------|
| ZNF573      | ZNF573      | 365.6290442 | 177.8279107 | 928.8450935 |
| 493.3223246 |             |             |             |             |
| CELF3       | CELF3       | 3.125034566 | 0           | 0           |
| INTS7       | INTS7       | 6593.822934 | 4594.474583 | 3775.593621 |
| 3487.582875 |             |             |             |             |
| LM04        | LM04        | 933.3436571 | 2551.214283 | 592.0969324 |
| 573.7446519 |             |             |             |             |
| PRMT5       | PRMT5       | 12489.72148 | 7253.089881 | 11451.6676  |
| 10073.38687 |             |             |             |             |
| ZNF324      | ZNF324      | 726.0496975 | 627.6797045 | 1131.786038 |
| 944.4719654 |             |             |             |             |
| TBC1D22A    | TBC1D22A    |             | 1909.39612  | 1839.90264  |
| 1719.42273  | 2031.154144 |             |             |             |
| FAS         | FAS         | 13513.69114 | 6956.416585 | 14266.07938 |
| 8090.289971 |             |             |             |             |
| FXYD3       | FXYD3       | 0           | 5.282017149 | 0           |
| PLAGL1      | PLAGL1      | 492.7137833 | 387.3479242 | 564.220429  |
| 608.071255  |             |             |             |             |
| MY01C       | MY01C       | 2319.817326 | 2216.68653  | 1261.133014 |
| 1730.060796 |             |             |             |             |
| TOMM5       | TOMM5       | 8564.678067 | 7684.454615 | 8211.302843 |
| 7894.137954 |             |             |             |             |
| BTN3A1      | BTN3A1      | 2134.398609 | 1932.33794  | 6019.094616 |
| 3966.193799 |             |             |             |             |
| RPAP1       | RPAP1       | 2594.820368 | 2897.186406 | 2472.088322 |
| 2773.589531 |             |             |             |             |
| ADAM19      | ADAM19      | 5013.597122 | 13216.48724 | 2098.543176 |
| 3642.542969 |             |             |             |             |
| EHMT2       | EHMT2       | 1.041678189 | 0           | 0           |
| CCDC153     | CCDC153     | 18.7502074  | 16.72638764 | 4.460240545 |
| 13.73064124 |             |             |             |             |
| THRB        | THRB        | 2.083356377 | 0.880336191 | 0           |
| ECM1        | ECM1        | 8.33342551  | 8.803361914 | 25.64638313 |
| 9.807600887 |             |             |             |             |
| CYP3A4      | CYP3A4      | 0           | 4.460240545 | 0.980760089 |
| AN010       | AN010       | 979.1774974 | 617.9960064 | 715.8686075 |
| 560.9947707 |             |             |             |             |
| PTGIR       | PTGIR       | 1657.309998 | 516.7573444 | 758.2408927 |
| 636.5132975 |             |             |             |             |
| CTSV        | CTSV        | 155.2100501 | 169.9048849 | 75.82408927 |
| 187.3251769 |             |             |             |             |
| NDUFB5      | NDUFB5      | 4618.801089 | 4841.849053 | 4091.15564  |
| 3969.136079 |             |             |             |             |
| PGM3        | PGM3        | 1664.601746 | 1119.787636 | 1423.931794 |
| 1279.891916 |             |             |             |             |
| PRRG2       | PRRG2       | 14.58349464 | 19.36739621 | 21.18614259 |
| 17.6536816  |             |             |             |             |
| RPL3        | RPL3        | 45895.29932 | 35502.19793 | 51811.26923 |
| 47908.16881 |             |             |             |             |
| CYB5R2      | CYB5R2      | 106.2511752 | 43.13647338 | 104.8156528 |



|                 |                |             |             |  |   |
|-----------------|----------------|-------------|-------------|--|---|
| 97.09524878     |                |             |             |  |   |
| CHPT1 CHPT1     | 1287.514241    | 2448.214948 | 868.6318462 |  |   |
| 2508.784307     |                |             |             |  |   |
| DET1 DET1       | 214.5857069    | 135.5717735 | 207.4011853 |  |   |
| 144.171733      |                |             |             |  |   |
| FAM63A FAM63A   | 659.3822934    | 605.6712997 | 549.7246472 |  |   |
| 718.897145      |                |             |             |  |   |
| LMBRD1 LMBRD1   | 3433.37131     | 2561.778317 | 3366.366551 |  |   |
| 2775.551051     |                |             |             |  |   |
| THBS4 THBS4     | 40.62544936    | 45.77748195 | 86.97469063 |  |   |
| 76.49928692     |                |             |             |  |   |
| DNAJC11 DNAJC11 | 5669.854381    | 3675.403599 | 3727.646036 |  |   |
| 4636.052939     |                |             |             |  |   |
| NAA38 NAA38     | 2047.939319    | 2940.322879 | 1391.59505  |  |   |
| 1815.386924     |                |             |             |  |   |
| TMEM51 TMEM51   | 3.125034566    | 4.401680957 | 4.460240545 |  |   |
| 5.884560532     |                |             |             |  |   |
| PHIP PHIP       | 4953.179787    | 4789.028881 | 5500.591652 |  |   |
| 4612.514697     |                |             |             |  |   |
| PEX26 PEX26     | 506.2555997    | 502.6719653 | 378.0053862 |  |   |
| 481.5532035     |                |             |             |  |   |
| LAMB3 LAMB3     | 90.62600242    | 143.4947992 | 15.61084191 |  |   |
| 69.6339663      |                |             |             |  |   |
| RBF0X2 RBF0X2   | 64.5840477     | 83.63193819 | 111.5060136 |  |   |
| 253.0361029     |                |             |             |  |   |
| MYL12B MYL12B   | 27896.14189    | 23990.92189 | 27612.23415 |  |   |
| 25168.2654      |                |             |             |  |   |
| SORBS2 SORBS2   | 0 0            | 3.345180409 | 0           |  |   |
| SHBG SHBG       | 2.083356377    | 5.282017149 | 2.230120273 |  | 0 |
| TMEM25 TMEM25   | 478.1302886    | 450.73213   | 935.5354543 |  |   |
| 849.3382368     |                |             |             |  |   |
| EIF2B4 EIF2B4   | 5397.976374    | 2921.835819 | 3707.574953 |  |   |
| 3668.042732     |                |             |             |  |   |
| SETD5 SETD5     | 2822.947891    | 4456.261801 | 4149.138767 |  |   |
| 3853.406388     |                |             |             |  |   |
| PLEKHG6 PLEKHG6 | 9.375103698    | 9.683698106 | 5.575300681 |  |   |
| 18.63444168     |                |             |             |  |   |
| PHB2 PHB2       | 15042.87472    | 10992.75802 | 10290.89    |  |   |
| 11780.89019     |                |             |             |  |   |
| ZNF234 ZNF234   | 510.4223125    | 463.0568367 | 718.0987278 |  |   |
| 654.1669791     |                |             |             |  |   |
| FNBP1L FNBP1L   | 68.75076045    | 31.69210289 | 291.0306956 |  |   |
| 113.7681703     |                |             |             |  |   |
| TMEM110-MUSTN1  | TMEM110-MUSTN1 | 2063.564492 | 1371.563786 |  |   |
| 1277.858916     | 1311.276239    |             |             |  |   |
| NCOA7 NCOA7     | 1890.645912    | 2104.003498 | 4856.086893 |  |   |
| 3859.290949     |                |             |             |  |   |
| RGMA RGMA       | 0 0.880336191  | 0           | 0           |  |   |
| RGS6 RGS6       | 135.4181645    | 80.99092961 | 28.99156354 |  |   |
| 39.23040355     |                |             |             |  |   |

|              |              |             |             |             |             |
|--------------|--------------|-------------|-------------|-------------|-------------|
| ZNF444       | ZNF444       | 987.5109229 | 1327.546977 | 931.0752138 |             |
| 1056.278615  |              |             |             |             |             |
| MBNL1        | MBNL1        | 17713.7376  | 20328.72333 | 22846.46713 |             |
| 21118.70699  |              |             |             |             |             |
| MSI2         | MSI2         | 90.62600242 | 191.0329535 | 62.44336763 |             |
| 78.46080709  |              |             |             |             |             |
| PLAC1        | PLAC1        | 2.083356377 | 5.282017149 | 0           | 5.884560532 |
| FAM3A        | FAM3A        | 816.6756999 | 907.6266134 | 975.6776192 |             |
| 1078.836098  |              |             |             |             |             |
| FGF12        | FGF12        | 0           | 0           | 5.575300681 | 1.961520177 |
| C15orf41     | C15orf41     |             |             | 736.4664794 | 555.4921368 |
| 507.352362   | 574.725412   |             |             |             |             |
| HIPK4        | HIPK4        | 0           | 0           | 3.345180409 | 0           |
| TMEM185A     | TMEM185A     |             |             | 764.5917905 | 608.3123083 |
| 659.0005405  | 546.2833694  |             |             |             |             |
| ZNF18        | ZNF18        | 842.7176547 | 751.8071075 | 826.259561  |             |
| 789.5118714  |              |             |             |             |             |
| DTD1         | DTD1         | 2596.903724 | 2562.658653 | 2401.839534 |             |
| 2683.359603  |              |             |             |             |             |
| CCDC121      | CCDC121      | 75.00082959 | 45.77748195 | 111.5060136 |             |
| 80.42232727  |              |             |             |             |             |
| FAM155B      | FAM155B      | 2.083356377 | 2.641008574 | 2.230120273 |             |
| 1.961520177  |              |             |             |             |             |
| ZNF542P      | ZNF542P      | 596.8816021 | 573.9791968 | 913.2342516 |             |
| 982.7216088  |              |             |             |             |             |
| GTF2H2B      | GTF2H2B      | 331.253664  | 67.78588674 | 340.0933416 |             |
| 71.59548647  |              |             |             |             |             |
| CCT6P3       | CCT6P3       | 98.95942793 | 94.19597248 | 132.6921562 |             |
| 101.9990492  |              |             |             |             |             |
| TP73-AS1     | TP73-AS1     |             | 736.4664794 | 1271.20546  |             |
| 1073.802911  | 1379.929445  |             |             |             |             |
| LOC100996291 | LOC100996291 |             | 4.166712755 | 10.5640343  | 0           |
| 8.826840798  |              |             |             |             |             |
| ATP5J2       | ATP5J2       | 6288.611225 | 8011.939678 | 4388.876696 |             |
| 5126.432983  |              |             |             |             |             |
| OSBPL8       | OSBPL8       | 7094.870143 | 5988.046774 | 5410.271781 |             |
| 4842.012558  |              |             |             |             |             |
| SNHG18       | SNHG18       | 0           | 0.880336191 | 0           | 0.980760089 |
| UBE2V1       | UBE2V1       | 15457.46264 | 12335.27071 | 11104.8839  |             |
| 12745.95811  |              |             |             |             |             |
| SLC25A12     | SLC25A12     |             | 3308.369927 | 3592.651997 |             |
| 2056.170891  | 2747.109008  |             |             |             |             |
| CARD14       | CARD14       | 47.91719668 | 97.71731725 | 76.9391494  |             |
| 98.07600887  |              |             |             |             |             |
| PRICKLE2-AS3 | PRICKLE2-AS3 |             | 2.083356377 | 0           | 0           |
| PDLIM3       | PDLIM3       | 1.041678189 | 0           | 0           | 0           |
| PIGT         | PIGT         | 7044.86959  | 5612.14322  | 5602.062125 |             |
| 5992.444142  |              |             |             |             |             |
| GMDS-AS1     | GMDS-AS1     |             | 115.6262789 | 86.27294676 |             |
| 119.3114346  | 117.6912106  |             |             |             |             |

|                 |              |               |             |
|-----------------|--------------|---------------|-------------|
| LARS2-AS1       | LARS2-AS1    | 4.166712755   | 10.5640343  |
| 4.460240545     | 14.71140133  |               |             |
| CHMP1A CHMP1A   | 6213.610396  | 6916.801456   | 4675.447151 |
| 4924.396405     |              |               |             |
| PPP1R13L        | PPP1R13L     | 13.54181645   | 46.65781815 |
| 17.84096218     | 31.38432284  |               |             |
| AP2B1 AP2B1     | 13097.01987  | 15767.70152   | 9920.690032 |
| 10447.05646     |              |               |             |
| COX7A1 COX7A1   | 1.041678189  | 0 0           | 0           |
| CABIN1 CABIN1   | 1236.47201   | 1641.826997   | 1157.432421 |
| 1218.10403      |              |               |             |
| PPP2R2A PPP2R2A | 1691.685378  | 2123.370894   | 1825.353443 |
| 1790.867922     |              |               |             |
| DGKZ DGKZ       | 2318.775648  | 5458.084387   | 2503.310006 |
| 2661.782881     |              |               |             |
| ZSCAN31 ZSCAN31 | 75.00082959  | 56.34151625   | 108.1608332 |
| 85.32612771     |              |               |             |
| SLC7A7 SLC7A7   | 28.12531109  | 18.48706002   | 35.68192436 |
| 31.38432284     |              |               |             |
| DMKN DMKN       | 2.083356377  | 1.760672383   | 5.575300681 |
| 8.826840798     |              |               |             |
| TPRA1 TPRA1     | 2971.907872  | 1610.134894   | 2995.051526 |
| 1928.174334     |              |               |             |
| PLEKHB1 PLEKHB1 | 257.2945126  | 205.1183326   | 1545.473349 |
| 1145.527784     |              |               |             |
| CLDN20 CLDN20   | 0 10.5640343 | 0             | 5.884560532 |
| TNNT3 TNNT3     | 3.125034566  | 1.760672383   | 4.460240545 |
| 12.74988115     |              |               |             |
| TCTN3 TCTN3     | 7521.958201  | 4897.310233   | 5014.425433 |
| 4679.206383     |              |               |             |
| CDYL CDYL       | 727.0913757  | 1122.428644   | 908.7740111 |
| 940.548925      |              |               |             |
| ABCC3 ABCC3     | 0 0          | 0 1.961520177 |             |
| ZMYND8 ZMYND8   | 1848.978785  | 1797.646503   | 1516.481785 |
| 1739.868397     |              |               |             |
| PHF23 PHF23     | 2138.565321  | 2184.114091   | 2379.538331 |
| 2230.248442     |              |               |             |
| SEC13 SEC13     | 13268.89677  | 10660.87128   | 9052.058186 |
| 8929.820607     |              |               |             |
| TAF1 TAF1       | 892.7182077  | 1221.026298   | 1477.454681 |
| 1146.508544     |              |               |             |
| GLIPR2 GLIPR2   | 2415.65172   | 2211.404513   | 1914.558254 |
| 1861.482648     |              |               |             |
| ZNF512 ZNF512   | 2430.235214  | 2379.548725   | 2002.648005 |
| 2368.535614     |              |               |             |
| PCSK6 PCSK6     | 176.0436139  | 32.57243908   | 2.230120273 |
| 9.807600887     |              |               |             |
| MMAB MMAB       | 600.0066367  | 896.1822429   | 970.1023186 |
| 1096.489779     |              |               |             |
| MFAP3 MFAP3     | 1341.681507  | 1443.751354   | 1452.923358 |

|             |             |             |             |             |             |
|-------------|-------------|-------------|-------------|-------------|-------------|
| 1414.256048 |             |             |             |             |             |
| COASY       | COASY       | 6969.868761 | 5797.013821 | 4794.758586 |             |
| 6003.232503 |             |             |             |             |             |
| C2orf88     | C2orf88     | 11.45846008 | 3.521344766 | 5.575300681 |             |
| 0.980760089 |             |             |             |             |             |
| TUBB        | TUBB        | 3046.908702 | 4020.495386 | 2346.086527 |             |
| 4277.094747 |             |             |             |             |             |
| SEMA5B      | SEMA5B      | 3.125034566 | 0           | 0           | 10.78836098 |
| INTS9       | INTS9       | 2682.321336 | 2314.403847 | 2096.313056 |             |
| 2810.858414 |             |             |             |             |             |
| MAVS        | MAVS        | 4511.508235 | 5172.855461 | 3269.35632  |             |
| 4351.632513 |             |             |             |             |             |
| STON2       | STON2       | 36.4587366  | 76.58924866 | 1.115060136 |             |
| 37.26888337 |             |             |             |             |             |
| SLC11A2     | SLC11A2     | 2702.113221 | 2545.932266 | 2769.809378 |             |
| 2735.339887 |             |             |             |             |             |
| CELF4       | CELF4       | 2.083356377 | 1.760672383 | 0           | 3.923040355 |
| HIPK1       | HIPK1       | 914.5934497 | 2540.650248 | 2447.556999 |             |
| 1381.890965 |             |             |             |             |             |
| ZNF594      | ZNF594      | 239.5859834 | 298.4339689 | 439.3336937 |             |
| 404.0731565 |             |             |             |             |             |
| VPS13A      | VPS13A      | 755.2166868 | 1552.032706 | 712.5234271 |             |
| 867.9726785 |             |             |             |             |             |
| HERPUD1     | HERPUD1     | 13372.02291 | 12323.82634 | 13987.31435 |             |
| 11005.10895 |             |             |             |             |             |
| ATF3        | ATF3        | 156.2517283 | 194.5542983 | 974.5625591 |             |
| 337.3814705 |             |             |             |             |             |
| GPX4        | GPX4        | 8161.548608 | 8989.112851 | 8512.36908  |             |
| 6884.935822 |             |             |             |             |             |
| NHSL2       | NHSL2       | 46.87551849 | 81.8712658  | 62.44336763 |             |
| 81.40308736 |             |             |             |             |             |
| C12orf71    | C12orf71    |             | 1.041678189 | 0           | 0           |
| MANEAL      | MANEAL      | 228.1275233 | 222.7250564 | 266.4993726 | 0           |
| 160.8446545 |             |             |             |             |             |
| TBCA        | TBCA        | 3479.20515  | 3796.009657 | 3080.911157 |             |
| 2757.897369 |             |             |             |             |             |
| CACNB4      | CACNB4      | 5.208390943 | 0           | 13.38072164 | 4.903800443 |
| ELP6        | ELP6        | 2554.194919 | 2129.533247 | 1532.092627 |             |
| 1834.021366 |             |             |             |             |             |
| ELFN1       | ELFN1       | 1.041678189 | 1.760672383 | 0           | 0           |
| DCAKD       | DCAKD       | 1135.429226 | 1184.052177 | 1014.704724 |             |
| 1512.332057 |             |             |             |             |             |
| EN01        | EN01        | 258057.021  | 184496.4573 | 163002.8359 |             |
| 216479.2513 |             |             |             |             |             |
| ZBTB17      | ZBTB17      | 2333.359143 | 2520.402516 | 2160.986544 |             |
| 2632.360078 |             |             |             |             |             |
| ARHGAP27    | ARHGAP27    |             | 138.5431991 | 88.91395534 |             |
| 18.95602232 | 25.49976231 |             |             |             |             |
| RNF130      | RNF130      | 188.5437522 | 236.8104355 | 802.8432981 |             |
| 1011.163651 |             |             |             |             |             |

|             |          |             |             |             |             |
|-------------|----------|-------------|-------------|-------------|-------------|
| GNL3L       | GNL3L    | 2264.608382 | 2662.136643 | 2292.56364  |             |
| 2440.131101 |          |             |             |             |             |
| ADAMTS12    | ADAMTS12 | 0           | 0           | 1.115060136 | 0           |
| SLC35A2     | SLC35A2  | 1647.934895 | 1478.964802 | 1781.866098 |             |
| 1764.3874   |          |             |             |             |             |
| KIF13A      | KIF13A   | 4.166712755 | 0           | 0           | 5.884560532 |
| SLFN11      | SLFN11   | 3822.958953 | 4857.695104 | 2563.523253 |             |
| 2833.415896 |          |             |             |             |             |
| SMARCA2     | SMARCA2  | 6374.028837 | 5714.262219 | 6862.080079 |             |
| 6558.342713 |          |             |             |             |             |
| NYNRIN      | NYNRIN   | 0           | 0           | 13.38072164 | 6.865320621 |
| ZC3H12A     | ZC3H12A  | 2792.739224 | 2062.627697 | 2660.533485 |             |
| 3187.470288 |          |             |             |             |             |
| ROPN1B      | ROPN1B   | 0           | 2.641008574 | 1.115060136 | 0           |
| KRBA2       | KRBA2    | 83.3342551  | 152.2981611 | 147.187938  |             |
| 96.11448869 |          |             |             |             |             |
| C4B         | C4B      | 1.041678189 | 0           | 3.345180409 | 2.942280266 |
| CSAG1       | CSAG1    | 19.79188559 | 1.760672383 | 4.460240545 | 0           |
| FAM72B      | FAM72B   | 1575.017421 | 1436.708664 | 741.5149906 |             |
| 1108.2589   |          |             |             |             |             |
| SOGA3       | SOGA3    | 752.0916522 | 561.6544901 | 548.609587  |             |
| 371.7080736 |          |             |             |             |             |
| BIRC5       | BIRC5    | 16813.72764 | 14237.67722 | 7775.31433  |             |
| 9512.3921   |          |             |             |             |             |
| PEG10       | PEG10    | 1.041678189 | 5.282017149 | 11.15060136 |             |
| 8.826840798 |          |             |             |             |             |
| H2AFY       | H2AFY    | 16933.52064 | 15669.98421 | 8813.435317 |             |
| 10765.80349 |          |             |             |             |             |
| C2CD4B      | C2CD4B   | 20.83356377 | 41.375801   | 1.115060136 |             |
| 57.86484523 |          |             |             |             |             |
| SMPD1       | SMPD1    | 258.3361908 | 614.4746616 | 325.5975598 |             |
| 237.3439415 |          |             |             |             |             |
| TFG         | TFG      | 5888.606801 | 4583.910549 | 6451.737948 |             |
| 5888.483572 |          |             |             |             |             |
| TYMS05      | TYMS05   | 2783.36412  | 3131.355833 | 1415.011313 |             |
| 2077.249868 |          |             |             |             |             |
| C9orf106    | C9orf106 | 0           | 0.880336191 | 1.115060136 |             |
| 1.961520177 |          |             |             |             |             |
| ICAM4       | ICAM4    | 29.16698928 | 24.64941336 | 10.03554123 |             |
| 4.903800443 |          |             |             |             |             |
| HARS        | HARS     | 12387.63702 | 8581.517194 | 7553.417363 |             |
| 8860.186641 |          |             |             |             |             |
| SPDYE3      | SPDYE3   | 385.4209298 | 384.7069157 | 353.4740632 |             |
| 510.9760062 |          |             |             |             |             |
| MRPS18C     | MRPS18C  | 4579.217318 | 5242.40202  | 4383.301396 |             |
| 4553.669092 |          |             |             |             |             |
| WNK1        | WNK1     | 1906.271085 | 6197.566788 | 2194.438348 |             |
| 2435.2273   |          |             |             |             |             |
| GLYCTK      | GLYCTK   | 689.5909609 | 599.5089464 | 479.4758586 |             |
| 476.6494031 |          |             |             |             |             |

|             |         |             |             |             |
|-------------|---------|-------------|-------------|-------------|
| DNAJC19     | DNAJC19 | 2778.155729 | 2610.196808 | 2867.93467  |
| 2941.299506 |         |             |             |             |
| GDF11       | GDF11   | 250.0027653 | 267.6222022 | 253.1186509 |
| 263.8244639 |         |             |             |             |
| IRF3        | IRF3    | 2790.655868 | 2599.632773 | 2677.259387 |
| 2721.609246 |         |             |             |             |
| IRAK1       | IRAK1   | 10265.73855 | 10245.3526  | 8027.317921 |
| 10081.23295 |         |             |             |             |
| FFAR1       | FFAR1   | 0           | 0           | 0.980760089 |
| GPR18       | GPR18   | 503.1305651 | 706.9099617 | 1466.304079 |
| 1252.430633 |         |             |             |             |
| NBPF9       | NBPF9   | 576.0480384 | 987.7372068 | 759.3559528 |
| 769.8966696 |         |             |             |             |
| ZKSCAN8     | ZKSCAN8 | 253.1277999 | 744.764418  | 599.9023533 |
| 503.1299255 |         |             |             |             |
| IDS         | IDS     | 12908.47611 | 10930.25415 | 15511.60156 |
| 10505.90207 |         |             |             |             |
| TBX5        | TBX5    | 0           | 0           | 0.980760089 |
| ABCD3       | ABCD3   | 3431.287954 | 3494.93468  | 3102.097299 |
| 4244.729664 |         |             |             |             |
| PEX19       | PEX19   | 6620.906567 | 5369.170432 | 5190.604934 |
| 5463.814454 |         |             |             |             |
| RSPH4A      | RSPH4A  | 2.083356377 | 6.16235334  | 42.37228518 |
| 3.923040355 |         |             |             |             |
| JUND        | JUND    | 5379.226166 | 5048.728058 | 3717.610494 |
| 5181.355548 |         |             |             |             |
| CCDC65      | CCDC65  | 66.66740408 | 59.86286102 | 44.60240545 |
| 55.90332505 |         |             |             |             |
| 1-Mar       | 1-Mar   | 15.62517283 | 35.21344766 | 20.07108245 |
| 5.884560532 |         |             |             |             |
| SHMT2       | SHMT2   | 13895.98704 | 11106.32139 | 11728.20251 |
| 12622.38234 |         |             |             |             |
| ZCCHC6      | ZCCHC6  | 5085.472917 | 5370.050768 | 5546.309118 |
| 5143.105905 |         |             |             |             |
| CNTLN       | CNTLN   | 20.83356377 | 239.4514441 | 5.575300681 |
| 86.3068878  |         |             |             |             |
| POP1        | POP1    | 1706.268873 | 1137.394359 | 1314.655901 |
| 1072.951537 |         |             |             |             |
| CFAP97      | CFAP97  | 2461.48556  | 2848.767915 | 2880.200332 |
| 4100.557931 |         |             |             |             |
| HMCES       | HMCES   | 7270.913757 | 5377.093457 | 6826.398154 |
| 6952.608269 |         |             |             |             |
| RAI14       | RAI14   | 5.208390943 | 7.923025723 | 102.5855325 |
| 53.94180488 |         |             |             |             |
| NCKIPSD     | NCKIPSD | 2035.439181 | 2162.105686 | 1196.459526 |
| 2258.690484 |         |             |             |             |
| TRIM55      | TRIM55  | 0           | 1.115060136 | 0           |
| DEPDC1      | DEPDC1  | 3866.709436 | 3339.115174 | 1685.970926 |
| 1710.445595 |         |             |             |             |
| KIR2DL4     | KIR2DL4 | 0           | 0.880336191 | 0           |
|             |         |             |             | 6.865320621 |

|                 |             |   |             |             |
|-----------------|-------------|---|-------------|-------------|
| C11orf73        | C11orf73    |   | 3778.16679  | 3624.3441   |
| 2614.81602      | 3273.777176 |   |             |             |
| AMZ2 AMZ2       | 8929.265434 |   | 6834.049854 | 6831.973455 |
| 6180.750079     |             |   |             |             |
| SHPK SHPK       | 1770.852921 |   | 1533.545645 | 1161.892662 |
| 1495.659135     |             |   |             |             |
| PCSK1N PCSK1N   | 12.50013826 |   | 5.282017149 | 128.2319157 |
| 71.59548647     |             |   |             |             |
| USF2 USF2       | 343.7538023 |   | 414.6383462 | 364.6246646 |
| 304.0356275     |             |   |             |             |
| UQCRC1 UQCRC1   | 24136.72531 |   | 17182.40178 | 13381.8367  |
| 16742.55547     |             |   |             |             |
| SLC13A3 SLC13A3 | 41.66712755 |   | 62.50386959 | 84.74457036 |
| 48.05724434     |             |   |             |             |
| BFSP1 BFSP1     | 45.8338403  |   | 80.99092961 | 26.76144327 |
| 23.53824213     |             |   |             |             |
| PLCE1 PLCE1     | 13.54181645 |   | 34.33311147 | 24.531323   |
| 14.71140133     |             |   |             |             |
| NRG3 NRG3       | 0 0         | 0 | 0.980760089 |             |
| GPS1 GPS1       | 9630.314855 |   | 7216.996097 | 5913.163903 |
| 6939.858387     |             |   |             |             |
| SEC22C SEC22C   | 3303.161536 |   | 2715.837151 | 3036.308751 |
| 2668.648201     |             |   |             |             |
| XKR6 XKR6       | 27.08363291 |   | 44.89714576 | 39.02710477 |
| 37.26888337     |             |   |             |             |
| FAM115C FAM115C | 2360.442776 |   | 3553.036869 | 2854.553949 |
| 3248.277414     |             |   |             |             |
| IZUM04 IZUM04   | 48.95887487 |   | 74.82857627 | 36.7969845  |
| 41.19192372     |             |   |             |             |
| MDH1B MDH1B     | 42.70880574 |   | 36.97412004 | 25.64638313 |
| 47.07648426     |             |   |             |             |
| EXOSC2 EXOSC2   | 4251.088688 |   | 3673.642927 | 3811.275546 |
| 4008.366482     |             |   |             |             |
| MYH11 MYH11     | 1471.891281 |   | 1231.590332 | 1353.683005 |
| 1153.373864     |             |   |             |             |
| ETV1 ETV1       | 20.83356377 |   | 44.01680957 | 27.87650341 |
| 51.9802847      |             |   |             |             |
| DHCR7 DHCR7     | 2315.650613 |   | 2829.400519 | 1747.299234 |
| 2962.876228     |             |   |             |             |
| MKS1 MKS1       | 1610.43448  |   | 1198.137557 | 1900.062472 |
| 1676.118992     |             |   |             |             |
| ZGPAT ZGPAT     | 4844.845256 |   | 3869.957898 | 3357.44607  |
| 3566.043682     |             |   |             |             |
| FES FES         | 663.5490062 |   | 837.1997181 | 90.31987104 |
| 364.842753      |             |   |             |             |
| A2M A2M         | 3.125034566 | 0 | 3.345180409 | 19.61520177 |
| MCM8-AS1        | MCM8-AS1    |   | 7.291747321 | 33.45277527 |
| 5.575300681     | 19.61520177 |   |             |             |
| MATR3 MATR3     | 28751.35969 |   | 26201.44607 | 31072.26576 |
| 28285.12096     |             |   |             |             |

|             |          |             |             |             |
|-------------|----------|-------------|-------------|-------------|
| RBM10       | RBM10    | 4319.839449 | 5001.189904 | 4084.465279 |
| 4276.113987 |          |             |             |             |
| FAH         | FAH      | 3305.244893 | 2737.845555 | 1872.185969 |
| 2611.764116 |          |             |             |             |
| KRT18       | KRT18    | 103.1261407 | 102.1189982 | 480.5909187 |
| 438.3997596 |          |             |             |             |
| FOXP1       | FOXP1    | 5921.940503 | 4649.055427 | 11378.07363 |
| 10903.10991 |          |             |             |             |
| MED24       | MED24    | 8724.05483  | 6971.3823   | 6278.903627 |
| 6924.166226 |          |             |             |             |
| SNX15       | SNX15    | 768.7585033 | 1403.255889 | 713.6384872 |
| 751.2622279 |          |             |             |             |
| NCOA1       | NCOA1    | 4762.552679 | 4536.372394 | 6414.940964 |
| 5828.657207 |          |             |             |             |
| AMZ1        | AMZ1     | 21.87524196 | 31.69210289 | 21.18614259 |
| 23.53824213 |          |             |             |             |
| CCBE1       | CCBE1    | 1.041678189 | 0           | 1.961520177 |
| CMC4        | CMC4     | 427.0880574 | 556.372473  | 486.1662194 |
| 489.3992842 |          |             |             |             |
| MIR6861     | MIR6861  | 8.33342551  | 9.683698106 | 15.61084191 |
| 11.76912106 |          |             |             |             |
| MIR6502     | MIR6502  | 2.083356377 | 0.880336191 | 0           |
| CDC14B      | CDC14B   | 229.1692015 | 806.3879514 | 257.5788915 |
| 482.5339636 |          |             |             |             |
| PPAPDC1B    | PPAPDC1B |             | 1197.929917 | 1427.024966 |
| 2050.595591 |          | 1646.696189 |             |             |
| MYOZ3       | MYOZ3    | 2.083356377 | 14.96571525 | 8.92048109  |
| 1.961520177 |          |             |             |             |
| SARDH       | SARDH    | 121.8763481 | 109.1616877 | 428.1830923 |
| 492.3415645 |          |             |             |             |
| UFD1L       | UFD1L    | 8374.050959 | 6072.559049 | 5024.460974 |
| 4874.377641 |          |             |             |             |
| RNF214      | RNF214   | 646.8821552 | 743.8840818 | 599.9023533 |
| 541.3795689 |          |             |             |             |
| NPW         | NPW      | 68.75076045 | 58.10218863 | 59.09818722 |
| 35.30736319 |          |             |             |             |
| EPHA10      | EPHA10   | 0           | 22.88874098 | 0           |
| 13.73064124 |          |             |             |             |
| CA10        | CA10     | 3.125034566 | 2.641008574 | 0           |
| 0           |          |             |             |             |
| ACD         | ACD      | 3906.293208 | 3246.679874 | 3462.261723 |
| 3842.618027 |          |             |             |             |
| CBS         | CBS      | 311.4617784 | 1024.711327 | 371.3150254 |
| 538.4372887 |          |             |             |             |
| CLINT1      | CLINT1   | 11219.91577 | 10068.40502 | 8003.901658 |
| 8425.709922 |          |             |             |             |
| SPTA1       | SPTA1    | 1.041678189 | 0           | 3.345180409 |
| 1.961520177 |          |             |             |             |
| ARHGEF4     | ARHGEF4  | 2.083356377 | 13.20504287 | 44.60240545 |
| 7.846080709 |          |             |             |             |
| UNC79       | UNC79    | 9.375103698 | 9.683698106 | 28.99156354 |
| 9.807600887 |          |             |             |             |
| FNIP1       | FNIP1    | 785.4253543 | 1419.982277 | 1415.011313 |



|             |           |             |             |             |             |
|-------------|-----------|-------------|-------------|-------------|-------------|
| 931.7220842 |           |             |             |             |             |
| DACT1       | DACT1     | 26.04195472 | 30.8117667  | 876.4372671 |             |
| 235.3824213 |           |             |             |             |             |
| SLC34A3     | SLC34A3   | 0           | 0           | 1.115060136 | 0           |
| ITPRIP      | ITPRIP    | 2638.570852 | 2851.408924 | 3373.056912 |             |
| 3441.487151 |           |             |             |             |             |
| LOC389831   | LOC389831 |             | 67.70908227 | 2164.746695 |             |
| 21.18614259 |           | 908.1838421 |             |             |             |
| PASK        | PASK      | 3980.252359 | 3963.273534 | 2763.119018 |             |
| 3874.00235  |           |             |             |             |             |
| PRPS2       | PRPS2     | 5529.227826 | 5304.90589  | 5415.847082 |             |
| 6151.327276 |           |             |             |             |             |
| NSG1        | NSG1      | 91.66768061 | 78.34992104 | 530.7686249 |             |
| 253.0361029 |           |             |             |             |             |
| ARHGEF28    | ARHGEF28  |             | 5.208390943 | 0           | 49.062646   |
| 6.865320621 |           |             |             |             |             |
| SLC7A9      | SLC7A9    | 0           | 0           | 4.460240545 | 1.961520177 |
| GRID2IP     | GRID2IP   | 0           | 6.16235334  | 4.460240545 | 6.865320621 |
| FAM47E      | FAM47E    | 1.041678189 | 4.401680957 | 28.99156354 | 0           |
| BCL6        | BCL6      | 113.5429226 | 300.1946413 | 1149.627    |             |
| 1023.913533 |           |             |             |             |             |
| GPC3        | GPC3      | 13.54181645 | 22.00840479 | 170.6042008 |             |
| 384.4579548 |           |             |             |             |             |
| GTF3C5      | GTF3C5    | 5537.561251 | 5092.744867 | 4319.742968 |             |
| 4191.768619 |           |             |             |             |             |
| KIF17       | KIF17     | 0           | 6.16235334  | 0           | 1.961520177 |
| FAM124B     | FAM124B   | 164.5851538 | 53.70050768 | 16.72590204 |             |
| 27.46128248 |           |             |             |             |             |
| ICAM2       | ICAM2     | 5108.389837 | 3259.004581 | 5792.737408 |             |
| 4242.768144 |           |             |             |             |             |
| TOR2A       | TOR2A     | 1591.684272 | 1250.077392 | 1080.493272 |             |
| 1147.489304 |           |             |             |             |             |
| ZBTB37      | ZBTB37    | 97.91774974 | 125.0077392 | 138.2674569 |             |
| 118.6719707 |           |             |             |             |             |
| NSUN5       | NSUN5     | 4022.961165 | 2786.264046 | 3036.308751 |             |
| 3354.199503 |           |             |             |             |             |
| APEX2       | APEX2     | 4679.218424 | 3509.020059 | 3307.268364 |             |
| 4141.749854 |           |             |             |             |             |
| PLEKHM1     | PLEKHM1   | 389.5876426 | 492.9882672 | 553.0698276 |             |
| 323.6508293 |           |             |             |             |             |
| CRHR1       | CRHR1     | 112.5012444 | 84.51227438 | 126.0017954 |             |
| 131.4218519 |           |             |             |             |             |
| ZNF347      | ZNF347    | 113.5429226 | 194.5542983 | 739.2848703 |             |
| 464.880282  |           |             |             |             |             |
| GLRA2       | GLRA2     | 1.041678189 | 0           | 4.460240545 | 0           |
| SNORD15A    | SNORD15A  |             | 12.50013826 | 7.923025723 |             |
| 8.92048109  |           | 12.74988115 |             |             |             |
| PTPRD       | PTPRD     | 1.041678189 | 3.521344766 | 0           | 16.67292151 |
| CSMD3       | CSMD3     | 0           | 0           | 3.923040355 |             |
| TTC39C      | TTC39C    | 1373.973531 | 1123.30898  | 2706.250951 |             |

|             |         |             |             |             |
|-------------|---------|-------------|-------------|-------------|
| 2294.978607 |         |             |             |             |
| SLC29A1     | SLC29A1 | 7426.123807 | 4001.12799  | 4755.731481 |
| 5440.276212 |         |             |             |             |
| G0S2        | G0S2    | 636.4653733 | 351.2541404 | 463.8650167 |
| 405.0539166 |         |             |             |             |
| OXR1        | OXR1    | 1388.557026 | 1175.248816 | 1749.529354 |
| 1553.52398  |         |             |             |             |
| CALU        | CALU    | 9002.182907 | 6468.710335 | 6371.453619 |
| 6014.020864 |         |             |             |             |
| CYP2C8      | CYP2C8  | 0           | 3.521344766 | 0           |
| 1.961520177 |         |             |             |             |
| MYCL        | MYCL    | 1.041678189 | 8.803361914 | 43.48734531 |
| 7.846080709 |         |             |             |             |
| RRAS2       | RRAS2   | 4490.674671 | 2514.240163 | 2755.313597 |
| 1615.311866 |         |             |             |             |
| CNPPD1      | CNPPD1  | 5785.48066  | 4479.150542 | 6302.31989  |
| 5053.856737 |         |             |             |             |
| POLR3GL     | POLR3GL | 1680.226918 | 1683.202798 | 2100.773297 |
| 1877.17481  |         |             |             |             |
| AK9         | AK9     | 236.4609488 | 213.9216945 | 400.3065889 |
| 439.3805197 |         |             |             |             |
| IL20RB      | IL20RB  | 20.83356377 | 26.41008574 | 43.48734531 |
| 36.28812328 |         |             |             |             |
| CREB5       | CREB5   | 0           | 6.16235334  | 0           |
| 2.942280266 |         |             |             |             |
| BIN1        | BIN1    | 4149.004226 | 2653.333281 | 2488.814224 |
| 2596.071955 |         |             |             |             |
| LDB2        | LDB2    | 0           | 0           | 0.980760089 |
| 1673.705265 |         |             |             |             |
| PICALM      | PICALM  | 2855.239915 | 5744.193649 | 1673.705265 |
| 1239.680752 |         |             |             |             |
| CITED1      | CITED1  | 4.166712755 | 8.803361914 | 0           |
| 4.903800443 |         |             |             |             |
| CAB39L      | CAB39L  | 822.9257691 | 741.2430732 | 609.9378945 |
| 643.3786182 |         |             |             |             |
| ZNF300      | ZNF300  | 42.70880574 | 31.69210289 | 163.91384   |
| 92.19144833 |         |             |             |             |
| BIRC7       | BIRC7   | 0           | 0           | 2.942280266 |
| 1241.061932 |         |             |             |             |
| ANKRD40     | ANKRD40 | 755.2166868 | 1845.184657 | 1241.061932 |
| 929.7605641 |         |             |             |             |
| SLC39A8     | SLC39A8 | 10862.62015 | 7117.518108 | 8688.548582 |
| 6793.725134 |         |             |             |             |
| MOAP1       | MOAP1   | 2384.401374 | 1790.603813 | 2718.516612 |
| 2702.974804 |         |             |             |             |
| CASP8       | CASP8   | 4705.260378 | 5653.519021 | 6612.306608 |
| 5175.470988 |         |             |             |             |
| TBC1D3H     | TBC1D3H | 43.75048393 | 54.58084387 | 51.29276627 |
| 65.71092594 |         |             |             |             |
| SMARCA4     | SMARCA4 | 4981.305098 | 7179.141641 | 4649.800768 |
| 5246.085714 |         |             |             |             |
| VWA9        | VWA9    | 5544.852998 | 4422.809026 | 5214.021197 |
| 4881.242961 |         |             |             |             |
| BZW1        | BZW1    | 28766.98486 | 24013.81063 | 25774.61505 |
| 32419.02473 |         |             |             |             |

|             |             |             |             |             |
|-------------|-------------|-------------|-------------|-------------|
| LCA5        | LCA5        | 19.79188559 | 14.96571525 | 26.76144327 |
| 18.63444168 |             |             |             |             |
| MRPL32      | MRPL32      | 4630.259549 | 3293.337692 | 4707.783895 |
| 3549.370761 |             |             |             |             |
| CASP12      | CASP12      | 1.041678189 | 4.401680957 | 21.18614259 |
| 2.942280266 |             |             |             |             |
| DLX2        | DLX2        | 0           | 3.521344766 | 2.230120273 |
| 0           |             |             |             | 0           |
| RAPGEF3     | RAPGEF3     | 37.50041479 | 20.2477324  | 52.4078264  |
| 53.94180488 |             |             |             |             |
| TP53INP1    | TP53INP1    |             | 1340.639829 | 3313.585425 |
| 3335.144868 | 2861.857939 |             |             |             |
| PFKFB1      | PFKFB1      | 37.50041479 | 29.93143051 | 36.7969845  |
| 26.48052239 |             |             |             |             |
| SSBP2       | SSBP2       | 2000.022122 | 2655.97429  | 2179.942566 |
| 1681.022792 |             |             |             |             |
| TRIB3       | TRIB3       | 2566.695057 | 1928.816595 | 3538.085812 |
| 2776.531811 |             |             |             |             |
| LPP         | LPP         | 672.9241099 | 592.4662568 | 679.071623  |
| 861.1073579 |             |             |             |             |
| SIGLEC7     | SIGLEC7     | 0           | 0           | 1.961520177 |
| 0           |             |             |             |             |
| PPP1R11     | PPP1R11     | 344.7954805 | 1277.367814 | 410.3421301 |
| 1760.464359 |             |             |             |             |
| MAGEF1      | MAGEF1      | 822.9257691 | 1194.616212 | 1305.73542  |
| 1751.637518 |             |             |             |             |
| RTEL1       | RTEL1       | 1528.141903 | 2407.719484 | 1082.723392 |
| 1998.789061 |             |             |             |             |
| LRRC4       | LRRC4       | 3.125034566 | 3.521344766 | 0           |
| 0           |             |             |             | 0.980760089 |
| LIAS        | LIAS        | 950.0105081 | 566.0561711 | 838.5252225 |
| 875.8187592 |             |             |             |             |
| ST13        | ST13        | 11083.45593 | 8937.173015 | 14359.74443 |
| 10568.67072 |             |             |             |             |
| CORIN       | CORIN       | 1.041678189 | 0           | 1.115060136 |
| 0           |             |             |             | 0           |
| ANXA8L1     | ANXA8L1     | 0           | 0           | 0.980760089 |
| 0           |             |             |             |             |
| RPL4        | RPL4        | 37761.87602 | 24865.09573 | 33094.98484 |
| 32286.62212 |             |             |             |             |
| LRP5        | LRP5        | 787.5087107 | 775.5761847 | 295.4909361 |
| 333.4584301 |             |             |             |             |
| ZW10        | ZW10        | 4435.465727 | 3524.866111 | 3240.364756 |
| 3303.199979 |             |             |             |             |
| CCRL2       | CCRL2       | 754.1750086 | 654.9701264 | 376.8903261 |
| 384.4579548 |             |             |             |             |
| HLA-DQB1    | HLA-DQB1    |             | 982.3025319 | 4705.396943 |
| 330.0578003 | 1398.563886 |             |             |             |
| SLC20A2     | SLC20A2     | 2319.817326 | 1297.615546 | 1678.165505 |
| 1371.102604 |             |             |             |             |
| KCNS1       | KCNS1       | 15.62517283 | 45.77748195 | 3.345180409 |
| 74.53776674 |             |             |             |             |
| SRSF12      | SRSF12      | 0           | 11.44437049 | 55.75300681 |
| 0           |             |             |             | 26.48052239 |
| DPH3P1      | DPH3P1      | 6.250069132 | 32.57243908 | 30.10662368 |
| 64.73016585 |             |             |             |             |

|              |              |             |             |             |
|--------------|--------------|-------------|-------------|-------------|
| ROM01        | ROM01        | 4310.464345 | 5076.01848  | 3070.875615 |
| 3995.616601  |              |             |             |             |
| TSGA10       | TSGA10       | 104.1678189 | 66.02521436 | 322.2523794 |
| 135.3448922  |              |             |             |             |
| YTHDF3       | YTHDF3       | 5201.099196 | 4772.302494 | 5653.354891 |
| 4956.761488  |              |             |             |             |
| STK25        | STK25        | 4446.924188 | 4037.221774 | 3893.789996 |
| 4868.49308   |              |             |             |             |
| CRAT         | CRAT         | 1171.887962 | 1375.965467 | 1484.145041 |
| 1574.119942  |              |             |             |             |
| TANG02       | TANG02       | 3284.411329 | 2554.735628 | 2164.331724 |
| 2411.689058  |              |             |             |             |
| SNX5         | SNX5         | 5830.272822 | 5415.82825  | 5726.94886  |
| 5520.698539  |              |             |             |             |
| GUCY2EP      | GUCY2EP      | 0           | 6.690360818 | 0           |
| MZF1         | MZF1         | 392.7126771 | 514.1163358 | 420.3776714 |
| 410.9384772  |              |             |             |             |
| TMEM161A     | TMEM161A     |             | 1251.055505 | 1159.402764 |
| 962.2968976  | 1431.909729  |             |             |             |
| SFSWAP       | SFSWAP       | 1225.01355  | 1298.495882 | 1432.852275 |
| 1108.2589    |              |             |             |             |
| TNIP1        | TNIP1        | 5213.599334 | 7996.093627 | 5628.823568 |
| 6943.781428  |              |             |             |             |
| ALG9         | ALG9         | 2048.980997 | 1558.195059 | 1680.395625 |
| 1733.983837  |              |             |             |             |
| NT5C         | NT5C         | 2242.73314  | 2258.062331 | 1581.155273 |
| 2291.055567  |              |             |             |             |
| C6orf106     | C6orf106     |             | 2357.317741 | 2440.291923 |
| 2165.446785  | 1788.906402  |             |             |             |
| NAIF1        | NAIF1        | 769.8001814 | 885.6182086 | 689.1071642 |
| 763.031349   |              |             |             |             |
| PTPRN2       | PTPRN2       | 360.4206533 | 429.6040614 | 250.8885307 |
| 254.9976231  |              |             |             |             |
| LGMM         | LGMM         | 10386.57322 | 11043.81752 | 2989.476225 |
| 3030.548674  |              |             |             |             |
| LOC100289656 | LOC100289656 |             | 1.041678189 | 0.880336191 |
| 1.115060136  | 0.980760089  |             |             |             |
| SZRD1        | SZRD1        | 5262.558209 | 5767.08239  | 3900.480357 |
| 4171.172657  |              |             |             |             |
| RBM46        | RBM46        | 0           | 5.282017149 | 3.345180409 |
| 3.923040355  |              |             |             |             |
| RNF216       | RNF216       | 3130.242957 | 3024.835154 | 5729.17898  |
| 5153.894266  |              |             |             |             |
| LRRC20       | LRRC20       | 508.3389561 | 1037.036034 | 425.9529721 |
| 520.7836071  |              |             |             |             |
| ADAM15       | ADAM15       | 2985.449689 | 2961.450948 | 2418.565436 |
| 2759.85889   |              |             |             |             |
| C19orf83     | C19orf83     |             | 242.711018  | 363.5788471 |
| 404.7668295  | 687.5128222  |             |             |             |
| CD8B         | CD8B         | 258.3361908 | 475.3815434 | 3061.955134 |
| 206.9403787  |              |             |             |             |

|             |             |             |             |             |
|-------------|-------------|-------------|-------------|-------------|
| AGBL5       | AGBL5       | 6795.908503 | 6654.461271 | 6947.939709 |
| 6556.381193 |             |             |             |             |
| ILK         | ILK         | 12048.04993 | 9181.026141 | 9840.405703 |
| 10638.30468 |             |             |             |             |
| VASP        | VASP        | 4302.130919 | 5966.918706 | 2934.838279 |
| 3504.255797 |             |             |             |             |
| LEPR        | LEPR        | 807.3005962 | 838.0800542 | 748.2053514 |
| 768.9159095 |             |             |             |             |
| FAM115A     | FAM115A     | 703.1327774 | 1140.915704 | 817.3390799 |
| 1373.064124 |             |             |             |             |
| NCBP1       | NCBP1       | 11037.62209 | 8607.046944 | 8617.184733 |
| 8808.206356 |             |             |             |             |
| TCF7L2      | TCF7L2      | 0           | 0.880336191 | 40.14216491 |
|             |             |             |             | 19.61520177 |
| SERINC2     | SERINC2     | 18.7502074  | 3.521344766 | 7.805420954 |
| 15.69216142 |             |             |             |             |
| LINC00380   | LINC00380   | 0           | 0           | 0           |
|             |             |             |             | 0.980760089 |
| GCDH        | GCDH        | 1716.685655 | 1986.918784 | 1371.523968 |
| 1894.828491 |             |             |             |             |
| KEL         | KEL         | 0           | 7.923025723 | 4.460240545 |
|             |             |             |             | 10.78836098 |
| ZNF821      | ZNF821      | 162.5017974 | 352.1344766 | 156.1084191 |
| 280.4973854 |             |             |             |             |
| HPSE        | HPSE        | 1148.971042 | 2003.645172 | 1117.290257 |
| 1439.75581  |             |             |             |             |
| TXLNG       | TXLNG       | 2652.112668 | 1457.836733 | 3354.10089  |
| 2182.191197 |             |             |             |             |
| SPDYE2B     | SPDYE2B     | 143.75159   | 138.2127821 | 136.0373366 |
| 117.6912106 |             |             |             |             |
| TMEM187     | TMEM187     | 460.4217594 | 429.6040614 | 609.9378945 |
| 447.2266004 |             |             |             |             |
| NAA10       | NAA10       | 5215.682691 | 4291.638933 | 4500.38271  |
| 4639.975979 |             |             |             |             |
| NRIP1       | NRIP1       | 1547.933788 | 1387.409838 | 2382.883511 |
| 1638.850108 |             |             |             |             |
| A1CF        | A1CF        | 0           | 1.760672383 | 0           |
|             |             |             |             | 0           |
| DDIT3       | DDIT3       | 1879.187452 | 1269.444788 | 5410.271781 |
| 2423.458179 |             |             |             |             |
| DAZL        | DAZL        | 9.375103698 | 0           | 17.84096218 |
|             |             |             |             | 5.884560532 |
| ARG2        | ARG2        | 4214.629951 | 2749.289926 | 3444.420761 |
| 3072.721358 |             |             |             |             |
| PEX11B      | PEX11B      | 3134.40967  | 2310.882503 | 3302.808124 |
| 2841.261977 |             |             |             |             |
| JRK         | JRK         | 676.0491445 | 1309.059917 | 706.9481264 |
| 825.7999947 |             |             |             |             |
| TRAF3IP2    | TRAF3IP2    |             | 1362.515071 | 956.9254401 |
| 1053.731829 | 1010.182891 |             |             |             |
| PLA2R1      | PLA2R1      | 1.041678189 | 0           | 0           |
|             |             |             |             | 0.980760089 |
| IP6K2       | IP6K2       | 4286.505746 | 3624.3441   | 3274.93162  |
| 3734.734418 |             |             |             |             |
| MIR3942     | MIR3942     | 1.041678189 | 0           | 0           |
|             |             |             |             | 2.942280266 |
| MIR3928     | MIR3928     | 2.083356377 | 0           | 0           |
|             |             |             |             | 0           |

|              |              |             |             |             |             |
|--------------|--------------|-------------|-------------|-------------|-------------|
| MIR3940      | MIR3940      | 78.12586415 | 404.0743119 | 114.851194  |             |
|              |              | 110.82589   |             |             |             |
| MIR3939      | MIR3939      | 11.45846008 | 18.48706002 | 2.230120273 |             |
|              |              | 8.826840798 |             |             |             |
| MIR3936      | MIR3936      | 0           | 0           | 2.942280266 |             |
| LOC151484    | LOC151484    |             | 6.250069132 | 4.401680957 |             |
|              |              | 6.690360818 | 1.961520177 |             |             |
| HLA-F        | HLA-F        | 569.7979692 | 449.8517938 | 935.5354543 |             |
|              |              | 515.8798066 |             |             |             |
| UBP1         | UBP1         | 1596.892663 | 2753.691607 | 1972.541381 |             |
|              |              | 1548.62018  |             |             |             |
| APP          | APP          | 166.6685102 | 510.594991  | 265.3843124 |             |
|              |              | 242.2477419 |             |             |             |
| LOC100652758 | LOC100652758 |             | 47.91719668 | 84.51227438 |             |
|              |              | 109.2758934 | 84.34536763 |             |             |
| CNIH4        | CNIH4        | 3514.622209 | 3697.412004 | 3056.379834 |             |
|              |              | 2993.279791 |             |             |             |
| LOC101928844 | LOC101928844 |             | 0           | 0.880336191 | 0           |
|              |              | ZNF503-AS1  | 0           | 0           | 2.230120273 |
|              |              | 1.961520177 |             |             |             |
| PROSER2-AS1  | PROSER2-AS1  |             | 3.125034566 | 1.760672383 |             |
|              |              | 16.72590204 | 10.78836098 |             |             |
| ARMCX5       | ARMCX5       | 589.5898548 | 546.6887749 | 1161.892662 |             |
|              |              | 939.5681649 |             |             |             |
| KTN1         | KTN1         | 3357.328802 | 4161.349177 | 3884.869515 |             |
|              |              | 4055.442967 |             |             |             |
| RILP         | RILP         | 204.168925  | 150.5374887 | 148.3029981 |             |
|              |              | 180.4598563 |             |             |             |
| CPVL         | CPVL         | 211.4606723 | 168.1442126 | 18.95602232 |             |
|              |              | 19.61520177 |             |             |             |
| POM121       | POM121       | 2433.360249 | 4022.256059 | 2592.514817 |             |
|              |              | 3498.371236 |             |             |             |
| ZNF749       | ZNF749       | 291.6698928 | 261.4598489 | 382.4656267 |             |
|              |              | 439.3805197 |             |             |             |
| LDLRAD2      | LDLRAD2      | 3.125034566 | 0.880336191 | 11.15060136 | 0           |
|              |              | TM2D2       | 1564.357412 | 2023.834147 |             |
|              |              | 1841.867447 |             |             |             |
| AGAP6        | AGAP6        | 248.9610871 | 360.0575023 | 324.4824997 |             |
|              |              | 327.5738696 |             |             |             |
| TNFAIP8      | TNFAIP8      | 10917.8291  | 11717.27471 | 13488.88247 |             |
|              |              | 16644.47946 |             |             |             |
| SGOL1        | SGOL1        | 3189.618614 | 3038.040197 | 1275.628796 |             |
|              |              | 1863.444168 |             |             |             |
| MARK3        | MARK3        | 6150.068026 | 4304.843976 | 5675.656094 |             |
|              |              | 5069.548898 |             |             |             |
| MIR7161      | MIR7161      | 23.95859834 | 18.48706002 | 12.2656615  |             |
|              |              | 26.48052239 |             |             |             |
| CHRNA3       | CHRNA3       | 64.5840477  | 47.53815434 | 62.44336763 |             |
|              |              | 57.86484523 |             |             |             |
| ANKS1B       | ANKS1B       | 146.8766246 | 343.3311147 | 141.6126373 |             |

|             |          |             |             |             |             |
|-------------|----------|-------------|-------------|-------------|-------------|
| 212.8249392 |          |             |             |             |             |
| USP1        | USP1     | 8263.633071 | 8057.71716  | 8245.869708 |             |
| 7044.799717 |          |             |             |             |             |
| SDC2        | SDC2     | 22.91692015 | 26.41008574 | 34.56686422 |             |
| 106.9028497 |          |             |             |             |             |
| SIAH1       | SIAH1    | 1011.469521 | 1114.505618 | 1282.319157 |             |
| 1172.008306 |          |             |             |             |             |
| SHC1        | SHC1     | 2511.486113 | 3023.074481 | 2486.584104 |             |
| 2155.710675 |          |             |             |             |             |
| SRC         | SRC      | 34.37538023 | 128.529084  | 51.29276627 |             |
| 121.614251  |          |             |             |             |             |
| SPRR3       | SPRR3    | 0           | 0           | 1.115060136 | 0           |
| RPL37       | RPL37    | 8951.140675 | 12598.49124 | 11213.04473 |             |
| 10037.09875 |          |             |             |             |             |
| TP53I11     | TP53I11  | 387.5042862 | 735.961056  | 1436.197456 |             |
| 2606.860316 |          |             |             |             |             |
| RUNX1T1     | RUNX1T1  | 0           | 0           | 3.345180409 | 1.961520177 |
| GABBR1      | GABBR1   | 6.250069132 | 0           | 7.805420954 | 0           |
| USP5        | USP5     | 9262.602454 | 8452.107774 | 6401.560242 |             |
| 8120.693534 |          |             |             |             |             |
| PIGG        | PIGG     | 3088.575829 | 2312.643175 | 2675.029267 |             |
| 2638.244639 |          |             |             |             |             |
| FAM210A     | FAM210A  | 1464.599533 | 1200.778565 | 1546.588409 |             |
| 1120.028021 |          |             |             |             |             |
| ANKRD19P    | ANKRD19P |             | 19.79188559 | 34.33311147 |             |
| 36.7969845  |          |             |             |             |             |
| INPP5J      | INPP5J   | 9.375103698 | 0           | 3.345180409 | 0.980760089 |
| SMEK1       | SMEK1    | 12556.38889 | 9923.14955  | 14645.19983 |             |
| 10297.00017 |          |             |             |             |             |
| DMRTC2      | DMRTC2   | 2.083356377 | 0           | 0           | 0           |
| SMIM6       | SMIM6    | 0           | 0           | 1.961520177 |             |
| MPC2        | MPC2     | 2913.573894 | 3006.348094 | 2361.697369 |             |
| 2581.360553 |          |             |             |             |             |
| CECR6       | CECR6    | 0           | 0.880336191 | 0           | 3.923040355 |
| C17orf99    | C17orf99 |             | 4.166712755 | 1.760672383 | 0           |
| 0           |          |             |             |             |             |
| TRMT1       | TRMT1    | 3153.159877 | 1756.270702 | 3415.429197 |             |
| 3546.428481 |          |             |             |             |             |
| ZNF83       | ZNF83    | 581.2564293 | 801.9862704 | 1215.415549 |             |
| 1507.428256 |          |             |             |             |             |
| PQLC1       | PQLC1    | 931.2603007 | 2166.507367 | 1057.077009 |             |
| 1257.334434 |          |             |             |             |             |
| EIF4E       | EIF4E    | 11950.13218 | 8272.519191 | 9626.314156 |             |
| 9445.700414 |          |             |             |             |             |
| ASNS        | ASNS     | 4816.719945 | 4657.858789 | 5978.952451 |             |
| 5463.814454 |          |             |             |             |             |
| RBM24       | RBM24    | 0           | 0           | 3.923040355 |             |
| COQ6        | COQ6     | 1702.10216  | 1346.034037 | 1387.13481  |             |
| 1506.447496 |          |             |             |             |             |
| STK11       | STK11    | 4880.262314 | 4436.014069 | 4469.161026 |             |

|             |             |             |             |             |
|-------------|-------------|-------------|-------------|-------------|
| 4467.362204 |             |             |             |             |
| PSEN2       | PSEN2       | 1486.474775 | 1141.79604  | 885.3577482 |
| 759.1083086 |             |             |             |             |
| BLMH        | BLMH        | 5674.021094 | 4277.553554 | 3446.650881 |
| 3593.504965 |             |             |             |             |
| DGUOK-AS1   | DGUOK-AS1   |             | 2319.817326 | 1675.279772 |
| 2725.206973 |             | 2125.307112 |             |             |
| CCDC84      | CCDC84      | 6089.650691 | 6260.070657 | 10843.95983 |
| 8265.846027 |             |             |             |             |
| EPPK1       | EPPK1       | 9.375103698 | 37.85445623 | 134.9222765 |
| 154.960094  |             |             |             |             |
| PARP1       | PARP1       | 30055.54078 | 27757.88045 | 19056.37773 |
| 23803.04735 |             |             |             |             |
| SLC25A11    | SLC25A11    |             | 9894.901114 | 6735.452201 |
| 5426.997683 |             | 6237.634164 |             |             |
| PLA2G10     | PLA2G10     | 0           | 1.760672383 | 0           |
|             |             |             |             | 2.942280266 |
| RUVBL1      | RUVBL1      | 9829.275389 | 6570.829333 | 6113.874727 |
| 7170.337008 |             |             |             |             |
| CASK        | CASK        | 1891.687591 | 1130.35167  | 1997.072704 |
| 2146.883834 |             |             |             |             |
| SEH1L       | SEH1L       | 7445.915693 | 6323.454863 | 8060.769725 |
| 7862.753631 |             |             |             |             |
| RYR1        | RYR1        | 162.5017974 | 136.4521097 | 36.7969845  |
| 74.53776674 |             |             |             |             |
| CD274       | CD274       | 1057.303362 | 739.4824008 | 3794.549644 |
| 2358.728013 |             |             |             |             |
| KIAA0895L   | KIAA0895L   |             | 428.1297356 | 489.4669224 |
| 191.7903434 |             | 270.6897845 |             |             |
| TMEM220-AS1 | TMEM220-AS1 |             | 9.375103698 | 8.803361914 |
| 26.76144327 |             | 28.44204257 |             |             |
| CD37        | CD37        | 1427.099119 | 2002.764836 | 1699.351648 |
| 1704.561034 |             |             |             |             |
| ARL16       | ARL16       | 1526.058546 | 1302.897563 | 1536.552868 |
| 1461.332532 |             |             |             |             |
| ZNF385A     | ZNF385A     | 2.083356377 | 3.521344766 | 21.18614259 |
| 20.59596186 |             |             |             |             |
| TCEAL4      | TCEAL4      | 94.79271517 | 361.8181747 | 398.0764686 |
| 620.8211361 |             |             |             |             |
| GDF9        | GDF9        | 3443.788092 | 3591.771661 | 2883.545512 |
| 2818.704495 |             |             |             |             |
| C4orf3      | C4orf3      | 3565.66444  | 4303.083304 | 6722.697562 |
| 6217.038202 |             |             |             |             |
| LIMCH1      | LIMCH1      | 0           | 0           | 23.41626286 |
| NOS3        | NOS3        | 796.8838144 | 340.6901061 | 3.923040355 |
| 514.8990466 |             |             |             | 619.9734358 |
| F12         | F12         | 58.33397857 | 82.751602   | 34.56686422 |
| 94.15296851 |             |             |             |             |
| HDAC2       | HDAC2       | 9407.395722 | 8123.742375 | 9228.237688 |
| 9293.6826   |             |             |             |             |
| ZNF222      | ZNF222      | 140.6265555 | 145.2554716 | 309.9867179 |



|             |             |             |             |             |
|-------------|-------------|-------------|-------------|-------------|
| 177.517576  |             |             |             |             |
| PSMD6-AS2   | PSMD6-AS2   | 248.9610871 | 253.5368231 |             |
| 509.5824823 | 314.8239885 |             |             |             |
| MGAT4EP     | MGAT4EP     | 0           | 0.880336191 | 0           |
| PITRM1-AS1  | PITRM1-AS1  | 2338.567534 | 1482.486146 |             |
| 2186.632927 | 1778.118041 |             |             |             |
| LINC01021   | LINC01021   | 3.125034566 | 11.44437049 |             |
| 13.38072164 | 10.78836098 |             |             |             |
| LINC00665   | LINC00665   | 17.70852921 | 20.2477324  |             |
| 36.7969845  | 47.07648426 |             |             |             |
| EFCAB14-AS1 | EFCAB14-AS1 | 1013.552878 | 798.4649256 |             |
| 1191.999286 | 901.3185215 |             |             |             |
| TBC1D2B     | TBC1D2B     | 3109.409393 | 5632.390953 | 2698.44553  |
| 3735.715178 |             |             |             |             |
| CRLS1       | CRLS1       | 3834.417413 | 2840.84489  | 3447.765941 |
| 3400.295227 |             |             |             |             |
| SGSM2       | SGSM2       | 556.2561528 | 1457.836733 | 936.6505145 |
| 1571.177662 |             |             |             |             |
| SRGAP3      | SRGAP3      | 134.3764863 | 93.31563629 | 136.0373366 |
| 47.07648426 |             |             |             |             |
| TRIP4       | TRIP4       | 3060.450518 | 1826.697597 | 2363.927489 |
| 2001.731341 |             |             |             |             |
| CD96        | CD96        | 10638.65934 | 10148.51561 | 9407.76237  |
| 8250.153866 |             |             |             |             |
| QRFP        | QRFP        | 0           | 0           | 1.115060136 |
| 0           | 0           |             |             | 0           |
| TEX9        | TEX9        | 7.291747321 | 29.05109432 | 22.30120273 |
| 20.59596186 |             |             |             |             |
| SYF2        | SYF2        | 2667.737841 | 2078.473748 | 3608.334601 |
| 2743.185968 |             |             |             |             |
| CES1        | CES1        | 8.33342551  | 4.401680957 | 0           |
| 0           | 0           |             |             | 0           |
| EFTUD1      | EFTUD1      | 2786.489155 | 2089.037782 | 2288.1034   |
| 2613.725636 |             |             |             |             |
| C20orf194   | C20orf194   | 115.6262789 | 159.3408507 |             |
| 74.70902913 | 147.1140133 |             |             |             |
| U2AF2       | U2AF2       | 596.8816021 | 1091.616877 | 512.9276627 |
| 500.1876452 |             |             |             |             |
| HHLA3       | HHLA3       | 347.920515  | 404.0743119 | 698.0276453 |
| 507.0529658 |             |             |             |             |
| TROVE2      | TROVE2      | 6291.73626  | 4781.105856 | 6670.289735 |
| 5415.75721  |             |             |             |             |
| RALGDS      | RALGDS      | 5926.107216 | 6356.027302 | 4253.95442  |
| 6888.858863 |             |             |             |             |
| ABCE1       | ABCE1       | 15157.45932 | 10824.61381 | 14288.38059 |
| 14423.05786 |             |             |             |             |
| PRKCSH      | PRKCSH      | 1839.603681 | 4072.435222 | 1999.302824 |
| 1893.847731 |             |             |             |             |
| LACE1       | LACE1       | 178.1269703 | 153.1784973 | 122.656615  |
| 139.2679326 |             |             |             |             |
| NUDCD1      | NUDCD1      | 4710.468769 | 3254.6029   | 4054.358655 |
| 3815.156745 |             |             |             |             |

|                 |               |               |             |   |
|-----------------|---------------|---------------|-------------|---|
| RASGEF1A        | RASGEF1A      | 29.16698928   | 66.90555055 |   |
| 83.62951022     | 152.9985738   |               |             |   |
| KCTD4 KCTD4     | 5.208390943   | 3.521344766   | 0 0         |   |
| ZNHIT6 ZNHIT6   | 2258.358313   | 1847.825666   | 2230.120273 |   |
| 2313.613049     |               |               |             |   |
| LAS1L LAS1L     | 6462.571483   | 4764.379468   | 5225.171799 |   |
| 5622.697588     |               |               |             |   |
| SCAPER SCAPER   | 1020.844625   | 1168.206126   | 1480.799861 |   |
| 1489.774575     |               |               |             |   |
| IL27RA IL27RA   | 14372.03397   | 10648.54657   | 9660.881021 |   |
| 12591.97878     |               |               |             |   |
| C6orf48 C6orf48 | 2.083356377   | 0 2.230120273 | 0           |   |
| BCL11A BCL11A   | 0 0.880336191 | 13.38072164   | 2.942280266 |   |
| GPR155 GPR155   | 610.4234186   | 558.1331454   | 2666.108786 |   |
| 1475.063173     |               |               |             |   |
| LRRC75A LRRC75A | 430.2130919   | 268.5025384   | 728.134269  |   |
| 440.3612798     |               |               |             |   |
| LRP8 LRP8       | 4018.794452   | 3030.997507   | 3199.107531 |   |
| 2963.856988     |               |               |             |   |
| KCTD18 KCTD18   | 841.6759765   | 999.1815773   | 1122.865557 |   |
| 1033.721133     |               |               |             |   |
| TRMT10B TRMT10B | 572.9230038   | 458.6551557   | 734.8246298 |   |
| 647.3016585     |               |               |             |   |
| VN1R10P VN1R10P | 0 0           | 0 0.980760089 |             |   |
| RPA30S RPA30S   | 1314.597874   | 1467.520431   | 1481.914921 |   |
| 1851.675047     |               |               |             |   |
| LOC728730       | LOC728730     | 64.5840477    | 50.17916291 |   |
| 115.9662542     | 74.53776674   |               |             |   |
| LOC400685       | LOC400685     | 4.166712755   | 29.05109432 |   |
| 126.0017954     | 43.1534439    |               |             |   |
| WFDC21P WFDC21P | 0 0           | 0 1.961520177 |             |   |
| MIR320A MIR320A | 3.125034566   | 1.760672383   | 7.805420954 | 0 |
| USP3-AS1        | USP3-AS1      | 922.9268752   | 815.1913133 |   |
| 987.9432807     | 968.0102075   |               |             |   |
| LOC643733       | LOC643733     | 33.33370204   | 64.26454197 |   |
| 403.6517693     | 234.4016612   |               |             |   |
| LOC440434       | LOC440434     | 363.5456879   | 427.843389  |   |
| 334.5180409     | 372.6888337   |               |             |   |
| THAP9-AS1       | THAP9-AS1     | 1207.305021   | 1118.907299 |   |
| 1733.918512     | 1399.544647   |               |             |   |
| LOC283038       | LOC283038     | 47.91719668   | 49.29882672 |   |
| 80.28432981     | 30.40356275   |               |             |   |
| LINC00837       | LINC00837     | 0 0           | 2.230120273 | 0 |
| LOC285484       | LOC285484     | 34.37538023   | 17.60672383 |   |
| 16.72590204     | 9.807600887   |               |             |   |
| RNF213 RNF213   | 30089.91616   | 42154.01819   | 21217.36427 |   |
| 17709.58492     |               |               |             |   |
| TIAM2 TIAM2     | 636.4653733   | 627.6797045   | 544.1493465 |   |
| 512.9375264     |               |               |             |   |
| LHFP LHFP       | 246.8777307   | 60.74319721   | 462.7499566 |   |

|                   |             |             |               |  |
|-------------------|-------------|-------------|---------------|--|
| 123.5757712       |             |             |               |  |
| HRSP12 HRSP12     | 894.8015641 | 699.8672722 | 795.0378772   |  |
| 758.1275485       |             |             |               |  |
| C8orf58 C8orf58   | 245.8360525 | 298.4339689 | 437.1035734   |  |
| 618.8596159       |             |             |               |  |
| SPDYA SPDYA       | 326.0452731 | 317.8013651 | 238.6228692   |  |
| 403.0923964       |             |             |               |  |
| PIK3R5 PIK3R5     | 3491.705289 | 5977.48274  | 3042.999112   |  |
| 3841.637267       |             |             |               |  |
| RPGRIP1L RPGRIP1L |             | 361.4623315 | 358.2968299   |  |
| 396.9614085       | 407.0154368 |             |               |  |
| SRRM5 SRRM5       | 218.7524196 | 301.0749775 | 224.1270874   |  |
| 283.4396656       |             |             |               |  |
| C1orf228 C1orf228 |             | 146.8766246 | 82.751602     |  |
| 585.4065715       | 834.6268355 |             |               |  |
| ORMDL1 ORMDL1     | 6143.817957 | 4922.839983 | 7180.987278   |  |
| 5223.528232       |             |             |               |  |
| FAM71F2 FAM71F2   | 1.041678189 | 9.683698106 | 1.115060136   |  |
| 0.980760089       |             |             |               |  |
| SYCE1 SYCE1       | 23.95859834 | 36.97412004 | 32.33674395   |  |
| 72.57624656       |             |             |               |  |
| SLC05A1 SLC05A1   | 44.79216211 | 15.84605145 | 6.690360818   |  |
| 4.903800443       |             |             |               |  |
| CDK16 CDK16       | 2468.777307 | 2644.529919 | 2389.573872   |  |
| 2516.630388       |             |             |               |  |
| CALCOC01 CALCOC01 |             | 1392.723738 | 1379.486812   |  |
| 2115.269078       | 1977.212339 |             |               |  |
| GM2A GM2A         | 2105.231619 | 2064.388369 | 918.8095523   |  |
| 1724.176236       |             |             |               |  |
| FBXL19 FBXL19     | 26.04195472 | 122.3667306 | 16.72590204   |  |
| 38.24964346       |             |             |               |  |
| SLC25A19 SLC25A19 |             | 4430.257337 | 2844.366235   |  |
| 3357.44607        | 3784.753182 |             |               |  |
| HDAC8 HDAC8       | 2021.897364 | 1916.491889 | 1234.371571   |  |
| 1687.888113       |             |             |               |  |
| IGF2 IGF2         | 1.041678189 | 11.44437049 | 3.345180409   |  |
| 112.7874102       |             |             |               |  |
| 9-Sep 9-Sep       | 4363.589932 | 15306.40536 | 4605.198363   |  |
| 6452.420623       |             |             |               |  |
| MTRNR2L4 MTRNR2L4 |             | 0 0         | 0 0.980760089 |  |
| MTRNR2L3 MTRNR2L3 |             | 5.208390943 | 12.32470668   |  |
| 51.29276627       | 25.49976231 |             |               |  |
| TMEM116 TMEM116   | 532.2975544 | 569.5775159 | 1236.601691   |  |
| 764.0121091       |             |             |               |  |
| NUDT16L1 NUDT16L1 |             | 4221.921699 | 2416.522845   |  |
| 3260.435838       | 2668.648201 |             |               |  |
| CSH2 CSH2         | 0 0         | 2.230120273 | 0             |  |
| FAHD1 FAHD1       | 1018.761269 | 809.0289599 | 821.7993204   |  |
| 909.1646022       |             |             |               |  |
| CABP1 CABP1       | 2.083356377 | 2.641008574 | 0 2.942280266 |  |

|                 |               |             |               |
|-----------------|---------------|-------------|---------------|
| LINC01355       | LINC01355     | 28.12531109 | 61.6235334    |
| 47.94758586     | 44.13420399   |             |               |
| TACR1 TACR1     | 9.375103698   | 6.16235334  | 0 0           |
| VCPIP1 VCPIP1   | 2489.610871   | 2676.222022 | 4263.989961   |
| 2753.974329     |               |             |               |
| PEA15 PEA15     | 497.9221742   | 1816.133563 | 884.2426881   |
| 788.5311113     |               |             |               |
| FKBP1B FKBP1B   | 83.3342551    | 91.55496391 | 121.5415549   |
| 64.73016585     |               |             |               |
| ZDHHC8 ZDHHC8   | 112.5012444   | 595.9876016 | 196.250584    |
| 314.8239885     |               |             |               |
| SFI1 SFI1       | 3918.793346   | 3957.991517 | 3220.293674   |
| 4616.437737     |               |             |               |
| GPR68 GPR68     | 3377.120688   | 2799.469089 | 1452.923358   |
| 1322.0646       |               |             |               |
| SH3YL1 SH3YL1   | 280.2114328   | 260.5795127 | 647.8499392   |
| 482.5339636     |               |             |               |
| ATN1 ATN1       | 107.2928534   | 386.467588  | 181.7548022   |
| 168.6907353     |               |             |               |
| MPP3 MPP3       | 0 0           | 6.690360818 | 10.78836098   |
| PDGFB PDGFB     | 0 14.08537906 | 0           | 83.36460754   |
| IL11 IL11       | 1.041678189   | 0.880336191 | 0 0           |
| ATP5D ATP5D     | 3639.623591   | 3990.563956 | 2892.465993   |
| 3560.159122     |               |             |               |
| MYC MYC         | 4596.925847   | 3485.250982 | 6743.883704   |
| 8613.035099     |               |             |               |
| ERCC8 ERCC8     | 967.7190373   | 887.378881  | 793.922817    |
| 878.7610394     |               |             |               |
| FNDC3B FNDC3B   | 1036.469798   | 753.5677799 | 895.3932894   |
| 1019.990492     |               |             |               |
| ALDH4A1 ALDH4A1 | 803.1338835   | 1045.839395 | 432.6433329   |
| 728.7047459     |               |             |               |
| EPRS EPRS       | 12707.43222   | 9739.159286 | 14733.28958   |
| 12051.57997     |               |             |               |
| PRSS12 PRSS12   | 6.250069132   | 8.803361914 | 0 9.807600887 |
| MAP4K3 MAP4K3   | 352.0872278   | 266.741866  | 509.5824823   |
| 414.8615175     |               |             |               |
| SOCS5 SOCS5     | 209.3773159   | 221.8447202 | 676.8415027   |
| 315.8047486     |               |             |               |
| ALKBH6 ALKBH6   | 1761.477817   | 1293.213865 | 1044.811348   |
| 1418.179088     |               |             |               |
| ANKRD20A3       | ANKRD20A3     | 3.125034566 | 10.5640343    |
| 4.460240545     | 1.961520177   |             |               |
| RUNX2 RUNX2     | 1550.017145   | 4061.871187 | 741.5149906   |
| 1956.616377     |               |             |               |
| C20orf27        | C20orf27      | 2010.438904 | 1606.613549   |
| 1570.004672     | 1837.944406   |             |               |
| GLB1 GLB1       | 7168.829295   | 4497.637602 | 5809.46331    |
| 5057.779777     |               |             |               |
| AHCYL2 AHCYL2   | 2136.481965   | 2246.617961 | 2096.313056   |

|                 |             |             |             |  |
|-----------------|-------------|-------------|-------------|--|
| 2724.551526     |             |             |             |  |
| APBB2 APBB2     | 27.08363291 | 55.46118006 | 57.98312709 |  |
| 40.21116364     |             |             |             |  |
| PRR7 PRR7       | 96.87607155 | 182.2295916 | 179.5246819 |  |
| 186.3444168     |             |             |             |  |
| SLIT1 SLIT1     | 8.33342551  | 35.21344766 | 4.460240545 |  |
| 18.63444168     |             |             |             |  |
| EZH2 EZH2       | 10842.82827 | 8990.873523 | 7828.837217 |  |
| 7145.818006     |             |             |             |  |
| AGAP7P AGAP7P   | 22.91692015 | 19.36739621 | 16.72590204 |  |
| 17.6536816      |             |             |             |  |
| PCGF6 PCGF6     | 1348.973254 | 1162.043773 | 1045.926408 |  |
| 1015.086692     |             |             |             |  |
| PPP6C PPP6C     | 6877.159402 | 6919.442465 | 6896.646943 |  |
| 5628.582149     |             |             |             |  |
| POLG POLG       | 6458.40477  | 7806.821346 | 6147.326531 |  |
| 7304.70114      |             |             |             |  |
| OVGP1 OVGP1     | 18.7502074  | 26.41008574 | 97.01023186 |  |
| 40.21116364     |             |             |             |  |
| AGL AGL         | 1471.891281 | 1971.072733 | 1829.813684 |  |
| 2253.786684     |             |             |             |  |
| SMC3 SMC3       | 7480.291073 | 7131.603487 | 7642.622174 |  |
| 6805.494255     |             |             |             |  |
| RERE RERE       | 518.755738  | 1077.531498 | 885.3577482 |  |
| 688.4935822     |             |             |             |  |
| NRBP1 NRBP1     | 14879.33125 | 10829.01549 | 11179.59293 |  |
| 11015.89732     |             |             |             |  |
| TRA2A TRA2A     | 2536.486389 | 3499.336361 | 2737.472635 |  |
| 2357.747253     |             |             |             |  |
| EEF2K EEF2K     | 1079.178603 | 1545.870352 | 877.5523272 |  |
| 1091.585979     |             |             |             |  |
| CCDC106 CCDC106 | 47.91719668 | 187.5116088 | 56.86806695 |  |
| 102.9798093     |             |             |             |  |
| RBM15B RBM15B   | 5418.809938 | 5603.339859 | 6041.395818 |  |
| 5203.91303      |             |             |             |  |
| GNL2 GNL2       | 10756.36898 | 8034.828419 | 8591.53835  |  |
| 10010.61823     |             |             |             |  |
| COPS8 COPS8     | 7723.002091 | 6082.242747 | 5679.001274 |  |
| 6458.305184     |             |             |             |  |
| CACNB2 CACNB2   | 45.8338403  | 66.90555055 | 115.9662542 |  |
| 78.46080709     |             |             |             |  |
| CEP120 CEP120   | 1508.350017 | 1898.004829 | 2295.908821 |  |
| 2276.344166     |             |             |             |  |
| ODF3B ODF3B     | 163.5434756 | 242.9727888 | 323.3674395 |  |
| 286.3819459     |             |             |             |  |
| NR5A1 NR5A1     | 1.041678189 | 0 0         | 0           |  |
| MTOR MTOR       | 1442.724291 | 3953.589836 | 1890.026931 |  |
| 1842.848207     |             |             |             |  |
| ROR1 ROR1       | 8.33342551  | 2.641008574 | 15.61084191 |  |
| 8.826840798     |             |             |             |  |

|             |             |             |             |             |
|-------------|-------------|-------------|-------------|-------------|
| ITGB3       | ITGB3       | 14.58349464 | 30.8117667  | 5.575300681 |
| 24.51900222 |             |             |             |             |
| SLC7A5      | SLC7A5      | 26130.49736 | 40401.26883 | 22565.47198 |
| 29537.55159 |             |             |             |             |
| CYFIP1      | CYFIP1      | 2033.355824 | 2358.420657 | 1746.184173 |
| 2760.83965  |             |             |             |             |
| RPS6KC1     | RPS6KC1     | 1107.303915 | 937.5580439 | 1378.214328 |
| 1184.758187 |             |             |             |             |
| PITPNA      | PITPNA      | 6804.241929 | 4986.224188 | 6064.812081 |
| 5421.64177  |             |             |             |             |
| PIN4        | PIN4        | 988.5526011 | 1767.715072 | 1101.679415 |
| 1478.986214 |             |             |             |             |
| ZFPL1       | ZFPL1       | 1252.097183 | 1111.86461  | 1130.670978 |
| 1120.028021 |             |             |             |             |
| DDX20       | DDX20       | 3369.82894  | 2215.806194 | 4137.988166 |
| 3482.679075 |             |             |             |             |
| VILL        | VILL        | 368.7540788 | 515.8770082 | 932.1902739 |
| 850.3189969 |             |             |             |             |
| GIPC1       | GIPC1       | 1383.348635 | 774.6958485 | 1072.687851 |
| 654.1669791 |             |             |             |             |
| BNIP1       | BNIP1       | 1112.512306 | 775.5761847 | 1054.846889 |
| 935.6451246 |             |             |             |             |
| ANKHD1      | ANKHD1      | 8221.965943 | 7904.538663 | 10246.28759 |
| 9743.851481 |             |             |             |             |
| KIAA0226    | KIAA0226    |             | 3004.199896 | 3390.174673 |
| 4555.020657 | 3093.31732  |             |             |             |
| CNTNAP3P2   | CNTNAP3P2   |             | 0           | 0           |
| CRYBB2      | CRYBB2      | 21.87524196 | 0           | 7.805420954 |
| CD44        | CD44        | 19468.96535 | 8866.74612  | 29834.54901 |
| 26277.50506 |             |             |             |             |
| HEXA        | HEXA        | 4630.259549 | 3315.346097 | 5222.941678 |
| 3883.809951 |             |             |             |             |
| HIST2H4A    | HIST2H4A    |             | 1.041678189 | 0.880336191 |
| 2.230120273 | 0           |             |             |             |
| HIST1H4L    | HIST1H4L    |             | 14.58349464 | 14.08537906 |
| 2.230120273 | 4.903800443 |             |             |             |
| HIST1H4E    | HIST1H4E    |             | 73.9591514  | 256.1778317 |
| 56.86806695 | 50.01876452 |             |             |             |
| PDE6A       | PDE6A       | 2.083356377 | 1.760672383 | 5.575300681 |
| 1.961520177 |             |             |             |             |
| LLGL1       | LLGL1       | 575.0063602 | 667.2948331 | 446.0240545 |
| 633.5710173 |             |             |             |             |
| CD248       | CD248       | 10.41678189 | 10.5640343  | 179.5246819 |
| 90.22992816 |             |             |             |             |
| PGLYRP4     | PGLYRP4     | 105.2094971 | 30.8117667  | 57.98312709 |
| 19.61520177 |             |             |             |             |
| COX16       | COX16       | 3389.620826 | 3837.385458 | 2796.570822 |
| 2932.472665 |             |             |             |             |
| GNA01       | GNA01       | 2.083356377 | 7.042689532 | 2.230120273 |
| 3.923040355 |             |             |             |             |

|             |         |             |             |             |
|-------------|---------|-------------|-------------|-------------|
| AP1M1       | AP1M1   | 11530.33587 | 9804.304164 | 8199.037182 |
| 7866.676671 |         |             |             |             |
| JAGN1       | JAGN1   | 3362.537193 | 2985.220025 | 3133.318983 |
| 3034.471714 |         |             |             |             |
| PARD6A      | PARD6A  | 865.6345748 | 830.1570285 | 700.2577656 |
| 764.9928692 |         |             |             |             |
| HMMR        | HMMR    | 5875.064984 | 6123.618548 | 3409.853897 |
| 5019.530134 |         |             |             |             |
| METTL13     | METTL13 | 6177.151659 | 4662.26047  | 4707.783895 |
| 5484.410416 |         |             |             |             |
| RWDD2B      | RWDD2B  | 798.9671707 | 1000.061913 | 705.8330663 |
| 964.0871672 |         |             |             |             |
| 6-Sep       | 6-Sep   | 15151.20925 | 12813.29327 | 11962.36514 |
| 9458.450295 |         |             |             |             |
| HNRNPA1     | HNRNPA1 | 37695.20861 | 31169.18319 | 41134.56843 |
| 38490.91044 |         |             |             |             |
| HIGD2A      | HIGD2A  | 3542.74752  | 3296.859037 | 2456.47748  |
| 2293.017087 |         |             |             |             |
| MTCL1       | MTCL1   | 0           | 2.641008574 | 3.345180409 |
| 0           |         |             |             | 0           |
| SMYD4       | SMYD4   | 1437.5159   | 1455.195724 | 1606.801656 |
| 1558.427781 |         |             |             |             |
| PWHP2A      | PWHP2A  | 1335.431438 | 1246.556047 | 1696.006467 |
| 1415.236808 |         |             |             |             |
| SSH2        | SSH2    | 993.760992  | 2979.057672 | 2156.526304 |
| 1758.502839 |         |             |             |             |
| SCFD2       | SCFD2   | 2246.899853 | 1777.398771 | 1658.094423 |
| 2408.746778 |         |             |             |             |
| ZFH2        | ZFH2    | 12.50013826 | 37.85445623 | 14.49578177 |
| 27.46128248 |         |             |             |             |
| FGD5        | FGD5    | 2.083356377 | 0.880336191 | 4.460240545 |
| 3.923040355 |         |             |             |             |
| TK1         | TK1     | 17661.65369 | 17067.07774 | 7049.410181 |
| 12078.06049 |         |             |             |             |
| DCAF17      | DCAF17  | 1187.513135 | 1434.947992 | 1598.996235 |
| 1848.732767 |         |             |             |             |
| GPR115      | GPR115  | 0           | 0           | 2.942280266 |
| 0           |         |             |             |             |
| SLC16A7     | SLC16A7 | 614.5901313 | 907.6266134 | 946.6860557 |
| 1294.603317 |         |             |             |             |
| DEDD2       | DEDD2   | 3330.245169 | 2202.601151 | 3843.61229  |
| 2773.589531 |         |             |             |             |
| IQGAP2      | IQGAP2  | 8114.67309  | 10115.94318 | 4490.347169 |
| 6403.382619 |         |             |             |             |
| GAS5        | GAS5    | 2628.15407  | 1827.577933 | 5544.078998 |
| 3282.604017 |         |             |             |             |
| FASTKD3     | FASTKD3 | 1914.604511 | 1611.895567 | 1420.586614 |
| 1436.81353  |         |             |             |             |
| DBI         | DBI     | 11244.91605 | 12404.81727 | 7841.102878 |
| 9013.185215 |         |             |             |             |
| CEP76       | CEP76   | 1723.977402 | 1367.162105 | 1244.407112 |
| 1098.451299 |         |             |             |             |

|             |             |             |             |             |             |
|-------------|-------------|-------------|-------------|-------------|-------------|
| LRFN2       | LRFN2       | 3.125034566 | 0           | 94.78011158 | 13.73064124 |
| VPS18       | VPS18       | 2891.698652 | 3077.655325 | 3176.806328 |             |
| 2523.495708 |             |             |             |             |             |
| NRSN2-AS1   | NRSN2-AS1   | 37.50041479 | 30.8117667  |             |             |
| 51.29276627 | 77.480047   |             |             |             |             |
| FCGR3B      | FCGR3B      | 0           | 5.282017149 | 0           | 0           |
| ANKRD18B    | ANKRD18B    | 2.083356377 | 29.93143051 |             |             |
| 4.460240545 | 9.807600887 |             |             |             |             |
| ZNF557      | ZNF557      | 970.8440719 | 783.4992104 | 1874.416089 |             |
| 1066.086216 |             |             |             |             |             |
| FAM160B1    | FAM160B1    | 4865.678819 | 5580.451118 |             |             |
| 3305.038244 | 3404.218268 |             |             |             |             |
| ARHGEF2     | ARHGEF2     | 990.6359575 | 2860.212286 | 921.0396726 |             |
| 1086.682178 |             |             |             |             |             |
| VIT         | VIT         | 0           | 0.880336191 | 0           | 0           |
| FIBP        | FIBP        | 6078.192231 | 5305.786226 | 4108.996602 |             |
| 4996.972652 |             |             |             |             |             |
| RAB6A       | RAB6A       | 9671.981982 | 7732.873106 | 10513.90202 |             |
| 8232.500184 |             |             |             |             |             |
| POLR2C      | POLR2C      | 3735.457985 | 4358.544484 | 3470.067144 |             |
| 3601.351046 |             |             |             |             |             |
| HAGLR       | HAGLR       | 1.041678189 | 4.401680957 | 0           | 24.51900222 |
| TRPV1       | TRPV1       | 206.2522814 | 228.0070736 | 263.1541922 |             |
| 221.65178   |             |             |             |             |             |
| STK19       | STK19       | 39.58377117 | 0           | 32.33674395 | 0           |
| TIRAP       | TIRAP       | 588.5481766 | 713.0723151 | 565.3354891 |             |
| 514.8990466 |             |             |             |             |             |
| DIS3L2      | DIS3L2      | 1316.681231 | 1184.932514 | 1138.476399 |             |
| 1610.408066 |             |             |             |             |             |
| TMEM107     | TMEM107     | 594.7982457 | 1084.574188 | 585.4065715 |             |
| 768.9159095 |             |             |             |             |             |
| NAV2        | NAV2        | 25.00027653 | 16.72638764 | 2.230120273 |             |
| 6.865320621 |             |             |             |             |             |
| CD320       | CD320       | 4015.669417 | 2530.086214 | 2738.587695 |             |
| 3003.087392 |             |             |             |             |             |
| BCCIP       | BCCIP       | 9334.478249 | 6695.837072 | 6970.240912 |             |
| 7890.214913 |             |             |             |             |             |
| WBP11       | WBP11       | 14368.90893 | 11553.53218 | 14155.68843 |             |
| 12221.25146 |             |             |             |             |             |
| RSL24D1     | RSL24D1     | 5340.684073 | 5468.648421 | 7536.691461 |             |
| 5603.082387 |             |             |             |             |             |
| LRRC42      | LRRC42      | 1585.434203 | 1566.998421 | 1595.651055 |             |
| 1926.212814 |             |             |             |             |             |
| COL6A2      | COL6A2      | 790.6337452 | 490.3472586 | 434.8734531 |             |
| 569.8216115 |             |             |             |             |             |
| ZNF398      | ZNF398      | 1476.057993 | 1599.57086  | 2634.887102 |             |
| 1882.07861  |             |             |             |             |             |
| SLC44A1     | SLC44A1     | 703.1327774 | 809.0289599 | 2002.648005 |             |
| 1692.791913 |             |             |             |             |             |
| TSSK3       | TSSK3       | 7.291747321 | 7.923025723 | 0           | 17.6536816  |



|             |          |             |             |             |             |
|-------------|----------|-------------|-------------|-------------|-------------|
| PANX2       | PANX2    | 21.87524196 | 38.73479242 | 4.460240545 |             |
| 16.67292151 |          |             |             |             |             |
| NUDT2       | NUDT2    | 1265.638999 | 1156.761756 | 884.2426881 |             |
| 926.8182838 |          |             |             |             |             |
| ATP1A3      | ATP1A3   | 21.87524196 | 102.1189982 | 66.90360818 |             |
| 21.57672195 |          |             |             |             |             |
| SERPINC1    | SERPINC1 |             | 5.208390943 | 0           | 3.345180409 |
| 1.961520177 |          |             |             |             |             |
| ARSA        | ARSA     | 609.3817404 | 1342.512692 | 308.8716577 |             |
| 828.7422749 |          |             |             |             |             |
| LY75        | LY75     | 2211.482795 | 2935.921198 | 5115.895905 |             |
| 4769.436311 |          |             |             |             |             |
| RAB9B       | RAB9B    | 13.54181645 | 55.46118006 | 64.6734879  |             |
| 80.42232727 |          |             |             |             |             |
| ISYNA1      | ISYNA1   | 1083.345316 | 1430.546311 | 1038.120987 |             |
| 1591.773624 |          |             |             |             |             |
| GP6         | GP6      | 0           | 10.5640343  | 4.460240545 | 16.67292151 |
| SMURF1      | SMURF1   | 840.6342983 | 1101.300575 | 1099.449294 |             |
| 988.6061694 |          |             |             |             |             |
| PEX11A      | PEX11A   | 166.6685102 | 112.6830325 | 333.4029807 |             |
| 215.7672195 |          |             |             |             |             |
| BASP1       | BASP1    | 36.4587366  | 26.41008574 | 127.1168555 |             |
| 45.11496408 |          |             |             |             |             |
| CYB5D1      | CYB5D1   | 521.8807725 | 485.0652415 | 987.9432807 |             |
| 606.1097348 |          |             |             |             |             |
| SNX4        | SNX4     | 5226.099473 | 3943.025801 | 3775.593621 |             |
| 4573.284293 |          |             |             |             |             |
| IFIT2       | IFIT2    | 936.4686916 | 214.8020307 | 29691.82131 |             |
| 3667.061972 |          |             |             |             |             |
| IL7         | IL7      | 138.5431991 | 109.1616877 | 62.44336763 |             |
| 77.480047   |          |             |             |             |             |
| HYPK        | HYPK     | 3369.82894  | 2203.481487 | 3206.912952 |             |
| 2875.58858  |          |             |             |             |             |
| PCYT1B      | PCYT1B   | 2.083356377 | 12.32470668 | 0           | 10.78836098 |
| MINPP1      | MINPP1   | 1937.521431 | 1529.143965 | 1519.826966 |             |
| 1615.311866 |          |             |             |             |             |
| ALAS2       | ALAS2    | 4.166712755 | 0.880336191 | 2.230120273 |             |
| 0.980760089 |          |             |             |             |             |
| RASGRP2     | RASGRP2  | 3929.210128 | 4749.413753 | 892.048109  |             |
| 798.3387122 |          |             |             |             |             |
| HES6        | HES6     | 193.7521431 | 356.5361575 | 186.2150428 |             |
| 296.1895468 |          |             |             |             |             |
| OTOG        | OTOG     | 0           | 0           | 0.980760089 |             |
| LONP1       | LONP1    | 7586.542248 | 8232.904062 | 7485.398695 |             |
| 10126.34792 |          |             |             |             |             |
| TMEM214     | TMEM214  | 4346.923081 | 4132.298083 | 3268.241259 |             |
| 3754.349619 |          |             |             |             |             |
| TRABD2A     | TRABD2A  | 2608.362185 | 1217.504953 | 2423.025676 |             |
| 1916.405213 |          |             |             |             |             |
| OCIAD1      | OCIAD1   | 6594.864613 | 6292.643096 | 6362.533138 |             |

|              |              |             |             |             |
|--------------|--------------|-------------|-------------|-------------|
| 6231.749603  |              |             |             |             |
| ZMYM1        | ZMYM1        | 301.0449965 | 276.4255641 | 468.3252572 |
| 389.3617552  |              |             |             |             |
| MGC16025     | MGC16025     |             | 3.125034566 | 3.521344766 |
| 1.115060136  |              | 8.826840798 |             |             |
| SREK1        | SREK1        | 3497.955358 | 3419.225768 | 3152.275005 |
| 3358.122544  |              |             |             |             |
| TTLL6        | TTLL6        | 0           | 0.880336191 | 0           |
| MED18        | MED18        | 1056.261683 | 1786.202132 | 944.4559354 |
| 1383.852485  |              |             |             |             |
| NUGGC        | NUGGC        | 64.5840477  | 147.8964802 | 56.86806695 |
| 57.86484523  |              |             |             |             |
| FECH         | FECH         | 3496.913679 | 2965.852629 | 2676.144327 |
| 2512.707347  |              |             |             |             |
| ZNF763       | ZNF763       | 18.7502074  | 22.00840479 | 345.6686422 |
| 197.1327778  |              |             |             |             |
| GPRASP2      | GPRASP2      | 30.20866747 | 36.09378385 | 216.3216664 |
| 146.1332532  |              |             |             |             |
| KDM2A        | KDM2A        | 1266.680677 | 3952.7095   | 1704.926948 |
| 1382.871725  |              |             |             |             |
| XPC          | XPC          | 5645.895783 | 3855.872518 | 7887.935404 |
| 5044.049136  |              |             |             |             |
| TBCC         | TBCC         | 2970.866194 | 2697.350091 | 3398.703295 |
| 2943.261026  |              |             |             |             |
| FLT4         | FLT4         | 25.00027653 | 36.09378385 | 56.86806695 |
| 137.3064124  |              |             |             |             |
| CACNA1H      | CACNA1H      | 3.125034566 | 21.12806859 | 23.41626286 |
| 18.63444168  |              |             |             |             |
| HECTD2       | HECTD2       | 271.8780073 | 285.228926  | 541.9192262 |
| 264.8052239  |              |             |             |             |
| GOLGA6L9     | GOLGA6L9     |             | 8.33342551  | 7.042689532 |
| 12.2656615   |              | 4.903800443 |             |             |
| LOC101929378 | LOC101929378 |             | 2.083356377 | 6.16235334  |
| 2.230120273  |              | 7.846080709 |             |             |
| TCEA2        | TCEA2        | 801.0505271 | 676.098195  | 477.2457383 |
| 732.6277862  |              |             |             |             |
| ADAM22       | ADAM22       | 66.66740408 | 132.0504287 | 72.47890886 |
| 92.19144833  |              |             |             |             |
| PRKG1        | PRKG1        | 0           | 0           | 6.690360818 |
| 1.961520177  |              |             |             |             |
| DCAF4L1      | DCAF4L1      | 4.166712755 | 8.803361914 | 10.03554123 |
| 17.6536816   |              |             |             |             |
| CELF2        | CELF2        | 13380.35633 | 11794.74429 | 9518.153323 |
| 10329.36525  |              |             |             |             |
| AMPD3        | AMPD3        | 1066.678465 | 1346.034037 | 1270.053495 |
| 1850.694287  |              |             |             |             |
| WDR31        | WDR31        | 37.50041479 | 90.67462772 | 62.44336763 |
| 96.11448869  |              |             |             |             |
| BROX         | BROX         | 2251.066566 | 3133.116505 | 2201.128709 |
| 1911.501413  |              |             |             |             |
| AGAP2        | AGAP2        | 741.6748704 | 981.5748535 | 462.7499566 |

|                 |               |             |               |  |  |
|-----------------|---------------|-------------|---------------|--|--|
| 591.3983335     |               |             |               |  |  |
| PSMD2 PSMD2     | 43916.11076   | 30582.87929 | 30147.8809    |  |  |
| 32354.29457     |               |             |               |  |  |
| SNORA19 SNORA19 | 9.375103698   | 4.401680957 | 5.575300681   |  |  |
| 5.884560532     |               |             |               |  |  |
| LIPA LIPA       | 2633.362461   | 2229.891573 | 4476.966447   |  |  |
| 3535.64012      |               |             |               |  |  |
| ACSF2 ACSF2     | 179.1686485   | 294.9126241 | 175.0644414   |  |  |
| 240.2862217     |               |             |               |  |  |
| SNORA71A        | SNORA71A      | 7.291747321 | 16.72638764   |  |  |
| 10.03554123     | 4.903800443   |             |               |  |  |
| CYCSP52 CYCSP52 | 1.041678189   | 0.880336191 | 10.03554123   |  |  |
| 2.942280266     |               |             |               |  |  |
| LOC101929524    | LOC101929524  | 43.75048393 | 63.38420578   |  |  |
| 123.7716751     | 63.74940576   |             |               |  |  |
| SCARNA22        | SCARNA22      | 40.62544936 | 92.4353001    |  |  |
| 51.29276627     | 20.59596186   |             |               |  |  |
| SCARNA7 SCARNA7 | 0 0.880336191 | 3.345180409 | 0             |  |  |
| SNORD20 SNORD20 | 17.70852921   | 17.60672383 | 11.15060136   |  |  |
| 28.44204257     |               |             |               |  |  |
| SCARNA4 SCARNA4 | 4.166712755   | 8.803361914 | 2.230120273   |  |  |
| 5.884560532     |               |             |               |  |  |
| SCARNA8 SCARNA8 | 5.208390943   | 5.282017149 | 0 3.923040355 |  |  |
| SCARNA15        | SCARNA15      | 9.375103698 | 4.401680957   |  |  |
| 18.95602232     | 14.71140133   |             |               |  |  |
| SNORA71B        | SNORA71B      | 11.45846008 | 12.32470668   |  |  |
| 13.38072164     | 35.30736319   |             |               |  |  |
| SIRPD SIRPD     | 0 1.760672383 | 0           | 1.961520177   |  |  |
| ZNF831 ZNF831   | 214.5857069   | 818.712658  | 378.0053862   |  |  |
| 372.6888337     |               |             |               |  |  |
| RPIA RPIA       | 3508.37214    | 3767.838899 | 4071.084558   |  |  |
| 4057.404487     |               |             |               |  |  |
| GMCL1 GMCL1     | 4509.424879   | 3534.549809 | 3155.620186   |  |  |
| 3136.470764     |               |             |               |  |  |
| RRAGA RRAGA     | 5163.598781   | 3898.128656 | 5073.52362    |  |  |
| 4655.668141     |               |             |               |  |  |
| STC2 STC2       | 37.50041479   | 85.39261057 | 5.575300681   |  |  |
| 44.13420399     |               |             |               |  |  |
| ALDH1B1 ALDH1B1 | 2520.861217   | 2089.037782 | 2145.375702   |  |  |
| 2650.99452      |               |             |               |  |  |
| CYP4F2 CYP4F2   | 0 0           | 20.07108245 | 0             |  |  |
| NUP155 NUP155   | 5759.438705   | 7665.967555 | 7034.9144     |  |  |
| 7547.929642     |               |             |               |  |  |
| ARHGAP1 ARHGAP1 | 6288.611225   | 6734.571864 | 4180.360451   |  |  |
| 5403.988089     |               |             |               |  |  |
| NP1PB9 NP1PB9   | 2.083356377   | 3.521344766 | 1.115060136   |  |  |
| 2.942280266     |               |             |               |  |  |
| DBNDD1 DBNDD1   | 0 0           | 47.94758586 | 45.11496408   |  |  |
| C16orf13        | C16orf13      | 1948.979891 | 2213.165185   |  |  |
| 1665.899844     | 2190.037278   |             |               |  |  |

|             |             |             |             |             |             |
|-------------|-------------|-------------|-------------|-------------|-------------|
| IL1R1       | IL1R1       | 1891.687591 | 331.006408  | 1712.732369 |             |
| 1781.060321 |             |             |             |             |             |
| CSF1R       | CSF1R       | 8.33342551  | 19.36739621 | 3.345180409 |             |
| 27.46128248 |             |             |             |             |             |
| LINC00261   | LINC00261   |             | 0           | 0           | 4.903800443 |
| BTBD1       | BTBD1       | 10553.24173 | 9543.724651 | 7403.999305 |             |
| 8358.037476 |             |             |             |             |             |
| ING4        | ING4        | 1021.886303 | 681.3802122 | 1429.507095 |             |
| 1109.23966  |             |             |             |             |             |
| ASTN2       | ASTN2       | 338.5454113 | 250.0154784 | 375.7752659 |             |
| 287.362706  |             |             |             |             |             |
| ARF6        | ARF6        | 25749.24315 | 24501.51688 | 20696.63119 |             |
| 26475.61859 |             |             |             |             |             |
| DENR        | DENR        | 10117.82025 | 8952.138731 | 7198.82824  |             |
| 8820.956237 |             |             |             |             |             |
| ZSWIM8      | ZSWIM8      | 1041.678189 | 3007.22843  | 1401.630591 |             |
| 1541.754859 |             |             |             |             |             |
| CCT2        | CCT2        | 19779.38545 | 17070.59909 | 16355.70208 |             |
| 18390.23242 |             |             |             |             |             |
| ZNF669      | ZNF669      | 461.4634376 | 415.5186824 | 679.071623  |             |
| 514.8990466 |             |             |             |             |             |
| BBX         | BBX         | 2060.439457 | 2171.789384 | 4892.883878 |             |
| 3470.909954 |             |             |             |             |             |
| PRR5        | PRR5        | 582.2981075 | 747.4054265 | 1456.268538 |             |
| 852.2805171 |             |             |             |             |             |
| MIR3124     | MIR3124     | 5.208390943 | 1.760672383 | 0           | 1.961520177 |
| MIR3122     | MIR3122     | 0           | 1.115060136 | 0           |             |
| MIR3121     | MIR3121     | 3.125034566 | 0           | 2.230120273 | 0           |
| PBX4        | PBX4        | 755.2166868 | 496.509612  | 379.1204463 |             |
| 665.9361002 |             |             |             |             |             |
| MROH7-TTC4  | MROH7-TTC4  |             | 4088.586891 | 2590.829411 |             |
| 3879.294214 | 3538.5824   |             |             |             |             |
| DPY19L1P1   | DPY19L1P1   |             | 20.83356377 | 65.14487817 |             |
| 17.84096218 | 82.38384745 |             |             |             |             |
| LOC284080   | LOC284080   |             | 0           | 0.880336191 | 0           |
| MT1JP       | MT1JP       | 1.041678189 | 0           | 0           | 2.942280266 |
| ENOSF1      | ENOSF1      | 17626.23663 | 19418.45571 | 10263.01349 |             |
| 13830.67877 |             |             |             |             |             |
| BCL2L15     | BCL2L15     | 153.1266937 | 110.9223601 | 54.63794668 |             |
| 10.78836098 |             |             |             |             |             |
| EXTL2       | EXTL2       | 294.7949274 | 258.8188403 | 485.0511593 |             |
| 294.2280266 |             |             |             |             |             |
| SIRPA       | SIRPA       | 1.041678189 | 0           | 0           | 4.903800443 |
| ZNF174      | ZNF174      | 877.0930349 | 661.1324798 | 965.642078  |             |
| 727.7239858 |             |             |             |             |             |
| TMPO        | TMPO        | 23744.01263 | 23232.07209 | 15027.66546 |             |
| 16323.77092 |             |             |             |             |             |
| ZNF492      | ZNF492      | 34.37538023 | 72.1875677  | 52.4078264  |             |
| 92.19144833 |             |             |             |             |             |
| FGF20       | FGF20       | 1.041678189 | 0           | 0           | 0.980760089 |

|         |         |             |   |             |             |
|---------|---------|-------------|---|-------------|-------------|
| NGEF    | NGEF    | 0           | 0 | 4.460240545 | 0           |
| IRS4    | IRS4    | 2.083356377 |   | 0           | 0           |
| CUL1    | CUL1    | 11244.91605 |   | 8548.944755 | 9300.716597 |
|         |         | 9713.447918 |   |             |             |
| ARPC2   | ARPC2   | 90336.41588 |   | 69046.52817 | 49694.88509 |
|         |         | 53733.88374 |   |             |             |
| CLDN10  | CLDN10  | 6.250069132 |   | 3.521344766 | 0           |
| DERL1   | DERL1   | 8520.927584 |   | 7505.746368 | 10035.54123 |
|         |         | 7728.389499 |   |             |             |
| SAMD8   | SAMD8   | 1063.553431 |   | 957.8057763 | 2106.348597 |
|         |         | 1474.082413 |   |             |             |
| SYTL1   | SYTL1   | 1212.513412 |   | 1544.10968  | 730.3643893 |
|         |         | 1069.028497 |   |             |             |
| DDIT4L  | DDIT4L  | 9.375103698 |   | 377.6642261 | 32.33674395 |
|         |         | 263.8244639 |   |             |             |
| RMND5A  | RMND5A  | 2934.407458 |   | 3332.072485 | 4179.245391 |
|         |         | 2676.494282 |   |             |             |
| EX05    | EX05    | 870.8429658 |   | 834.5587095 | 1045.926408 |
|         |         | 896.414721  |   |             |             |
| EPS8L2  | EPS8L2  | 252.0861217 |   | 348.6131318 | 108.1608332 |
|         |         | 513.9182865 |   |             |             |
| NDUFB11 | NDUFB11 | 4531.300121 |   | 5171.975125 | 3801.240005 |
|         |         | 4161.365056 |   |             |             |
| UBB     | UBB     | 42974.43367 |   | 39806.16157 | 40006.12757 |
|         |         | 38692.94702 |   |             |             |
| EXOC6   | EXOC6   | 1471.891281 |   | 1809.090873 | 1128.440858 |
|         |         | 1160.239185 |   |             |             |
| DICER1  | DICER1  | 2365.651167 |   | 4647.294755 | 2760.888897 |
|         |         | 2998.183591 |   |             |             |
| PLSCR1  | PLSCR1  | 8370.925924 |   | 5864.799707 | 7126.349331 |
|         |         | 3640.581449 |   |             |             |
| FAM117A | FAM117A | 786.4670325 |   | 2627.803531 | 1193.114346 |
|         |         | 1179.854387 |   |             |             |
| GDPD5   | GDPD5   | 652.0905461 |   | 464.8175091 | 659.0005405 |
|         |         | 715.9548647 |   |             |             |
| MLN     | MLN     | 0           | 0 | 2.230120273 | 0           |
| ADAM8   | ADAM8   | 9994.902221 |   | 11131.85114 | 2658.303365 |
|         |         | 5457.929893 |   |             |             |
| ZFP1    | ZFP1    | 1279.180816 |   | 1559.075395 | 1727.228151 |
|         |         | 1644.734669 |   |             |             |
| PTPN7   | PTPN7   | 55203.73561 |   | 33607.71444 | 28622.47864 |
|         |         | 32474.92806 |   |             |             |
| CTDSPL2 | CTDSPL2 | 4280.255677 |   | 4508.201636 | 4241.688758 |
|         |         | 3832.810427 |   |             |             |
| TRMT112 | TRMT112 | 9361.561882 |   | 8361.433146 | 12076.10128 |
|         |         | 9584.968347 |   |             |             |
| IFT57   | IFT57   | 1370.848496 |   | 1189.334195 | 1971.426321 |
|         |         | 1717.310915 |   |             |             |
| TTC32   | TTC32   | 428.1297356 |   | 845.1227438 | 558.6451283 |
|         |         | 724.7817055 |   |             |             |

|             |             |             |             |             |
|-------------|-------------|-------------|-------------|-------------|
| BTN2A1      | BTN2A1      | 1904.187729 | 1470.16144  | 2133.110041 |
| 1492.716855 |             |             |             |             |
| COMMD3      | COMMD3      | 6794.866825 | 6678.230348 | 4189.280932 |
| 4922.434885 |             |             |             |             |
| CD302       | CD302       | 63.54236951 | 94.19597248 | 108.1608332 |
| 114.7489304 |             |             |             |             |
| ZC3H4       | ZC3H4       | 303.1283529 | 519.3983529 | 506.2373019 |
| 307.9586678 |             |             |             |             |
| MLC1        | MLC1        | 42.70880574 | 78.34992104 | 2.230120273 |
| 0.980760089 |             |             |             |             |
| PLEKHM2     | PLEKHM2     | 2364.609488 | 2332.890907 | 2188.863047 |
| 2503.880506 |             |             |             |             |
| CXorf58     | CXorf58     | 5.208390943 | 2.641008574 | 11.15060136 |
| 6.865320621 |             |             |             |             |
| IL1RL2      | IL1RL2      | 4.166712755 | 0           | 21.57672195 |
|             |             |             | 0           |             |
| KDSR        | KDSR        | 3947.960335 | 4997.668559 | 6141.751231 |
| 6690.745325 |             |             |             |             |
| IKZF1       | IKZF1       | 18900.20906 | 29821.38848 | 23766.39174 |
| 25099.61219 |             |             |             |             |
| PABPC1      | PABPC1      | 9476.146483 | 18029.2852  | 13842.35653 |
| 13289.2992  |             |             |             |             |
| PEBP1       | PEBP1       | 16088.71962 | 13124.05194 | 14174.64445 |
| 14056.25359 |             |             |             |             |
| UCKL1       | UCKL1       | 2096.898194 | 1918.252561 | 1778.520917 |
| 2048.807825 |             |             |             |             |
| PDE6G       | PDE6G       | 248.9610871 | 143.4947992 | 40.14216491 |
| 68.65320621 |             |             |             |             |
| CYLD        | CYLD        | 21966.90964 | 21113.10288 | 21428.11064 |
| 18165.63836 |             |             |             |             |
| DISC2       | DISC2       | 15.62517283 | 21.12806859 | 13.38072164 |
| 23.53824213 |             |             |             |             |
| PSMB2       | PSMB2       | 21418.98692 | 19902.64062 | 13691.82341 |
| 14908.53411 |             |             |             |             |
| AIF1        | AIF1        | 45.8338403  | 76.58924866 | 31.22168382 |
| 73.55700665 |             |             |             |             |
| MSX1        | MSX1        | 3.125034566 | 1.760672383 | 7.805420954 |
| 10.78836098 |             |             |             |             |
| TRAPPC11    | TRAPPC11    |             | 3668.790581 | 3605.85704  |
| 3438.84546  | 3405.199028 |             |             |             |
| CD99L2      | CD99L2      | 1225.01355  | 1267.684116 | 1160.777602 |
| 961.1448869 |             |             |             |             |
| SERF1B      | SERF1B      | 13.54181645 | 54.58084387 | 30.10662368 |
| 65.71092594 |             |             |             |             |
| SH3BP4      | SH3BP4      | 4.166712755 | 12.32470668 | 0           |
| MYBBP1A     | MYBBP1A     | 5069.847744 | 5024.078645 | 16.67292151 |
| 5958.117539 |             |             |             | 5489.441051 |
| S100A14     | S100A14     | 0           | 1.760672383 | 3.345180409 |
|             |             |             |             | 0           |
| TMEM27      | TMEM27      | 8.33342551  | 2.641008574 | 24.531323   |
| 13.73064124 |             |             |             |             |
| MRS2        | MRS2        | 3016.700034 | 2185.874763 | 3109.90272  |

|             |         |             |             |             |
|-------------|---------|-------------|-------------|-------------|
| 2405.804498 |         |             |             |             |
| ADGB        | ADGB    | 0           | 0.880336191 | 0           |
| CNOT2       | CNOT2   | 5051.097537 | 4193.04128  | 4993.23929  |
| 5243.143434 |         |             |             |             |
| GOLIM4      | GOLIM4  | 260.4195472 | 508.8343187 | 173.9493813 |
| 179.4790962 |         |             |             |             |
| RFWD3       | RFWD3   | 6665.698729 | 9460.973049 | 6381.48916  |
| 7376.296627 |         |             |             |             |
| RPS6KA6     | RPS6KA6 | 0           | 0           | 6.690360818 |
| VPS13C      | VPS13C  | 2233.358037 | 3119.911462 | 3625.060503 |
| 2800.070053 |         |             |             |             |
| OGT         | OGT     | 4640.676331 | 7783.052269 | 5565.26514  |
| 7210.548172 |         |             |             |             |
| MRPL49      | MRPL49  | 9618.856394 | 6139.464599 | 9269.494913 |
| 8024.579045 |         |             |             |             |
| APOPT1      | APOPT1  | 1611.476158 | 1497.451862 | 1465.189019 |
| 1626.100227 |         |             |             |             |
| ALG1        | ALG1    | 4522.966695 | 2876.058337 | 3549.236414 |
| 3084.490479 |         |             |             |             |
| FBXW5       | FBXW5   | 10241.77995 | 8622.892995 | 6639.068051 |
| 8079.50161  |         |             |             |             |
| DPCR1       | DPCR1   | 0           | 0           | 5.575300681 |
| IL12RB1     | IL12RB1 | 3283.369651 | 2347.856623 | 1466.304079 |
| 1529.004978 |         |             |             |             |
| STRC        | STRC    | 0           | 0           | 6.865320621 |
| HYAL1       | HYAL1   | 7.291747321 | 19.36739621 | 23.41626286 |
| 12.74988115 |         |             |             |             |
| UBA1        | UBA1    | 25075.27736 | 21820.01284 | 16253.11655 |
| 18104.83124 |         |             |             |             |
| TPM3        | TPM3    | 81433.1924  | 65060.36589 | 46118.88724 |
| 58682.79915 |         |             |             |             |
| PDS5A       | PDS5A   | 12143.88432 | 17137.50464 | 11340.16159 |
| 11214.99161 |         |             |             |             |
| IP07        | IP07    | 777.0919288 | 1471.922112 | 985.7131605 |
| 999.3945304 |         |             |             |             |
| TEAD2       | TEAD2   | 13.54181645 | 14.08537906 | 8.92048109  |
| 8.826840798 |         |             |             |             |
| GBP6        | GBP6    | 29.16698928 | 22.00840479 | 1112.830016 |
| 657.1092594 |         |             |             |             |
| LPAR2       | LPAR2   | 1312.514518 | 1100.420239 | 1019.164965 |
| 1448.582651 |         |             |             |             |
| SOX21       | SOX21   | 0           | 1.760672383 | 0           |
| MSN         | MSN     | 84617.60262 | 74354.9554  | 58830.57279 |
| 68351.1321  |         |             |             |             |
| C2CD5       | C2CD5   | 3169.826728 | 3494.054344 | 2641.577463 |
| 3402.256748 |         |             |             |             |
| WDR88       | WDR88   | 11.45846008 | 22.00840479 | 8.92048109  |
| 33.34584301 |         |             |             |             |
| CACNB1      | CACNB1  | 226.0441669 | 372.382209  | 433.758393  |
| 243.228502  |         |             |             |             |

|              |              |             |             |             |   |
|--------------|--------------|-------------|-------------|-------------|---|
| NF1          | NF1          | 229.1692015 | 514.996672  | 673.4963223 |   |
| 307.9586678  |              |             |             |             |   |
| LGALS9B      | LGALS9B      | 1.041678189 | 4.401680957 | 0           | 0 |
| CPS1         | CPS1         | 5.208390943 | 27.29042193 | 53.52288654 |   |
| 44.13420399  |              |             |             |             |   |
| PRKCQ        | PRKCQ        | 6702.157466 | 6628.931522 | 5946.615707 |   |
| 5739.408039  |              |             |             |             |   |
| LTBP3        | LTBP3        | 811.467309  | 1052.882085 | 1047.041468 |   |
| 1138.662463  |              |             |             |             |   |
| KIAA0141     | KIAA0141     |             | 2397.94319  | 1811.731882 |   |
| 1352.567945  | 1866.386449  |             |             |             |   |
| MIR34A       | MIR34A       | 1.041678189 | 0.880336191 | 2.230120273 | 0 |
| LOC100506124 | LOC100506124 |             | 3.125034566 | 12.32470668 |   |
| 13.38072164  | 20.59596186  |             |             |             |   |
| LINC00881    | LINC00881    |             | 6.250069132 | 17.60672383 |   |
| 13.38072164  | 38.24964346  |             |             |             |   |
| LOC100288069 | LOC100288069 |             | 87.50096785 | 111.8026963 |   |
| 110.3909535  | 140.2486927  |             |             |             |   |
| HNRNPCL2     | HNRNPCL2     |             | 0           | 1.115060136 | 0 |
| PAXIP1       | PAXIP1       | 968.7607155 | 1475.443457 | 812.8788393 |   |
| 979.7793286  |              |             |             |             |   |
| RRM2B        | RRM2B        | 3753.166514 | 2653.333281 | 3194.64729  |   |
| 2111.576471  |              |             |             |             |   |
| GLTSCR2      | GLTSCR2      | 2556.278275 | 2802.110097 | 4663.18149  |   |
| 3369.891665  |              |             |             |             |   |
| NMT1         | NMT1         | 7767.794253 | 6474.872688 | 6868.770439 |   |
| 6575.996395  |              |             |             |             |   |
| ESD          | ESD          | 5158.39039  | 5175.496469 | 5925.429564 |   |
| 5970.86742   |              |             |             |             |   |
| KRIT1        | KRIT1        | 1880.229131 | 1848.706002 | 2275.837738 |   |
| 1867.367209  |              |             |             |             |   |
| PKP3         | PKP3         | 1.041678189 | 2.641008574 | 1.115060136 | 0 |
| POLI         | POLI         | 452.0883339 | 517.6376806 | 690.2222243 |   |
| 732.6277862  |              |             |             |             |   |
| SORBS3       | SORBS3       | 273.9613636 | 302.8356499 | 669.0360818 |   |
| 729.685506   |              |             |             |             |   |
| DNAJC8       | DNAJC8       | 11178.24864 | 10370.36034 | 10016.5852  |   |
| 10810.91846  |              |             |             |             |   |
| LPPR2        | LPPR2        | 46.87551849 | 69.54655912 | 131.5770961 |   |
| 141.2294528  |              |             |             |             |   |
| KDM3B        | KDM3B        | 1254.180539 | 2575.863696 | 1740.608873 |   |
| 1593.735144  |              |             |             |             |   |
| QPCTL        | QPCTL        | 109.3762098 | 214.8020307 | 110.3909535 |   |
| 211.8441792  |              |             |             |             |   |
| DUT          | DUT          | 15380.37846 | 18046.01159 | 11496.27    |   |
| 14649.61344  |              |             |             |             |   |
| FAM107B      | FAM107B      | 45886.96589 | 44118.04823 | 17879.98929 |   |
| 21695.39392  |              |             |             |             |   |
| ATP5G1       | ATP5G1       | 6934.451702 | 6895.673388 | 6041.395818 |   |
| 6365.132975  |              |             |             |             |   |



|             |             |             |             |             |
|-------------|-------------|-------------|-------------|-------------|
| IL19        | IL19        | 93.75103698 | 20.2477324  | 97.01023186 |
| 3.923040355 |             |             |             |             |
| ANAPC2      | ANAPC2      | 197.9188559 | 405.8349843 | 246.4282901 |
| 163.7869348 |             |             |             |             |
| CDV3        | CDV3        | 8376.134315 | 10840.45986 | 8000.556478 |
| 7007.530834 |             |             |             |             |
| SGSH        | SGSH        | 1623.976296 | 949.0024144 | 1433.967335 |
| 1451.524931 |             |             |             |             |
| BIK         | BIK         | 236.4609488 | 283.4682536 | 303.2963571 |
| 407.0154368 |             |             |             |             |
| TMEM231     | TMEM231     | 102.0844625 | 150.5374887 | 115.9662542 |
| 188.305937  |             |             |             |             |
| TAGLN2      | TAGLN2      | 48589.07911 | 40609.90851 | 32963.40775 |
| 37187.48028 |             |             |             |             |
| EPC1        | EPC1        | 1000.011061 | 1162.924109 | 1963.6209   |
| 1171.027546 |             |             |             |             |
| SCN4B       | SCN4B       | 0           | 28.99156354 | 0           |
| NIPA1       | NIPA1       | 3129.201279 | 2354.018976 | 1733.918512 |
| 1956.616377 |             |             |             |             |
| COL6A6      | COL6A6      | 0           | 2.641008574 | 7.805420954 |
| LOC151174   | LOC151174   |             | 18.7502074  | 58.10218863 |
| 40.14216491 | 100.037529  |             |             |             |
| MSH5-SAPCD1 | MSH5-SAPCD1 |             | 35.41705842 | 31.69210289 |
| 13.38072164 | 29.42280266 |             |             |             |
| SFMBT2      | SFMBT2      | 535.422589  | 1457.836733 | 1183.078805 |
| 1188.681227 |             |             |             |             |
| ECSIT       | ECSIT       | 1577.100778 | 1019.42931  | 1822.008263 |
| 1330.89144  |             |             |             |             |
| DCAF8       | DCAF8       | 3619.831706 | 5499.460188 | 3713.150254 |
| 4818.474316 |             |             |             |             |
| SPARCL1     | SPARCL1     | 12.50013826 | 14.08537906 | 2.230120273 |
| 11.76912106 |             |             |             |             |
| EFHC1       | EFHC1       | 79.16754234 | 55.46118006 | 160.5686596 |
| 133.3833721 |             |             |             |             |
| NSUN5P2     | NSUN5P2     | 363.5456879 | 486.8259139 | 273.1897334 |
| 479.5916834 |             |             |             |             |
| NSUN5P1     | NSUN5P1     | 317.7118476 | 529.0820511 | 245.31323   |
| 478.6109233 |             |             |             |             |
| LOC283683   | LOC283683   |             | 0           | 6.16235334  |
| 2.942280266 |             |             |             | 12.2656615  |
| IQCH-AS1    | IQCH-AS1    |             | 214.5857069 | 213.0413583 |
| 549.7246472 | 396.2270758 |             |             |             |
| C16orf96    | C16orf96    |             | 0           | 3.521344766 |
| 3.923040355 |             |             |             | 0           |
| GPR133      | GPR133      | 48.95887487 | 14.96571525 | 75.82408927 |
| 35.30736319 |             |             |             |             |
| RLN2        | RLN2        | 81.25089872 | 191.0329535 | 130.4620359 |
| 114.7489304 |             |             |             |             |
| RANBP1      | RANBP1      | 16213.72101 | 11559.69453 | 9936.300874 |
| 11363.08639 |             |             |             |             |

|             |             |               |               |             |
|-------------|-------------|---------------|---------------|-------------|
| GPC1        | GPC1        | 169.7935448   | 182.2295916   | 172.8343211 |
| 136.3256523 |             |               |               |             |
| C11orf44    | C11orf44    | 16.66685102   | 42.25613719   |             |
| 3.345180409 | 10.78836098 |               |               |             |
| ZNF322      | ZNF322      | 356.2539405   | 317.8013651   | 686.8770439 |
| 442.3228    |             |               |               |             |
| KMT2E       | KMT2E       | 7437.582267   | 6752.178588   | 11476.19892 |
| 8957.28189  |             |               |               |             |
| DOCK9       | DOCK9       | 1068.761822   | 2072.311395   | 3299.462943 |
| 2657.85984  |             |               |               |             |
| LRRFIP2     | LRRFIP2     | 2455.235491   | 2084.636101   | 1322.461322 |
| 1617.273386 |             |               |               |             |
| ZKSCAN5     | ZKSCAN5     | 1353.139967   | 1468.400767   | 958.9517172 |
| 1049.413295 |             |               |               |             |
| VWA3B       | VWA3B       | 1.041678189   | 1.760672383   | 0 0         |
| SNRPE       | SNRPE       | 11915.7568    | 12107.26364   | 11351.31219 |
| 11898.5814  |             |               |               |             |
| TBCB        | TBCB        | 8282.383278   | 5605.100531   | 4464.700786 |
| 4794.936073 |             |               |               |             |
| CIRBP       | CIRBP       | 3435.454666   | 3765.197891   | 6225.380741 |
| 4682.148663 |             |               |               |             |
| CHI3L1      | CHI3L1      | 0 5.282017149 | 0             | 0.980760089 |
| ZNF630      | ZNF630      | 31.25034566   | 22.88874098   | 263.1541922 |
| 156.9216142 |             |               |               |             |
| C12orf74    | C12orf74    | 0             | 0.880336191   | 6.690360818 |
| 0           |             |               |               |             |
| TAC4        | TAC4        | 0 7.042689532 | 3.345180409   | 4.903800443 |
| GATSL3      | GATSL3      | 500.0055306   | 296.6732965   | 299.9511767 |
| 221.65178   |             |               |               |             |
| ORC4        | ORC4        | 2133.35693    | 1861.911045   | 2776.499739 |
| 2585.283594 |             |               |               |             |
| PPP2R3A     | PPP2R3A     | 11.45846008   | 26.41008574   | 112.6210738 |
| 48.05724434 |             |               |               |             |
| PRIM2       | PRIM2       | 1953.146604   | 1795.885831   | 1021.395085 |
| 1444.659611 |             |               |               |             |
| SIGLEC10    | SIGLEC10    | 70.83411683   | 28.17075813   |             |
| 63.55842777 | 16.67292151 |               |               |             |
| CNR1        | CNR1        | 0 0           | 0 1.961520177 |             |
| HCK         | HCK         | 6.250069132   | 8.803361914   | 0 0         |
| C8G         | C8G         | 11.45846008   | 16.72638764   | 23.41626286 |
| 12.74988115 |             |               |               |             |
| ELAVL3      | ELAVL3      | 0 2.641008574 | 0             | 0           |
| ZCCHC9      | ZCCHC9      | 1801.061588   | 1765.074064   | 1328.036622 |
| 1513.312817 |             |               |               |             |
| ARF1        | ARF1        | 47553.65099   | 34819.05704   | 38062.57775 |
| 36630.40855 |             |               |               |             |
| AREG        | AREG        | 3.125034566   | 4.401680957   | 17.84096218 |
| 29.42280266 |             |               |               |             |
| CGGBP1      | CGGBP1      | 8696.971197   | 10571.95732   | 9244.96359  |
| 9720.313239 |             |               |               |             |

|                |                |             |             |             |   |
|----------------|----------------|-------------|-------------|-------------|---|
| APLP2          | APLP2          | 4259.422114 | 2815.31514  | 6911.142725 |   |
| 4911.646524    |                |             |             |             |   |
| PPFIA3         | PPFIA3         | 13.54181645 | 16.72638764 | 80.28432981 |   |
| 120.6334909    |                |             |             |             |   |
| PNRC2          | PNRC2          | 2442.735353 | 1759.792047 | 2450.90218  |   |
| 1923.270534    |                |             |             |             |   |
| TESC           | TESC           | 1813.561727 | 1706.091539 | 864.1716056 |   |
| 1035.682654    |                |             |             |             |   |
| ABHD11         | ABHD11         | 753.1333304 | 782.6188742 | 783.8872758 |   |
| 879.7417995    |                |             |             |             |   |
| PDE4B          | PDE4B          | 5286.516808 | 3012.510447 | 3111.01778  |   |
| 4028.962444    |                |             |             |             |   |
| L2HGDH         | L2HGDH         | 975.0107846 | 931.3956905 | 863.0565455 |   |
| 1002.336811    |                |             |             |             |   |
| FLI1           | FLI1           | 4425.048946 | 5818.141889 | 3017.352729 |   |
| 3466.006153    |                |             |             |             |   |
| TMSB4X         | TMSB4X         | 374332.2655 | 507112.3811 | 243121.0218 |   |
| 316725.6823    |                |             |             |             |   |
| HSPB2-C11orf52 | HSPB2-C11orf52 | 5.884560532 | 4.166712755 | 2.641008574 | 0 |
| 5.884560532    |                |             |             |             |   |
| DDX11L9        | DDX11L9        | 3.125034566 | 4.401680957 | 3.345180409 |   |
| 4.903800443    |                |             |             |             |   |
| LOC100505795   | LOC100505795   |             | 0           | 3.345180409 | 0 |
| EXD2           | EXD2           | 723.9663411 | 658.4914712 | 1149.627    |   |
| 978.7985685    |                |             |             |             |   |
| LOC101926889   | LOC101926889   |             | 1.041678189 | 1.760672383 |   |
| 1.115060136    | 2.942280266    |             |             |             |   |
| LSP1           | LSP1           | 29581.5772  | 25290.29811 | 17364.8315  |   |
| 19155.22529    |                |             |             |             |   |
| SPDYE2         | SPDYE2         | 143.75159   | 138.2127821 | 136.0373366 |   |
| 117.6912106    |                |             |             |             |   |
| FLOT1          | FLOT1          | 0           | 0           | 1.961520177 |   |
| RGCC           | RGCC           | 2881.28187  | 2495.753103 | 3967.383965 |   |
| 5948.309938    |                |             |             |             |   |
| ALYREF         | ALYREF         | 10467.82412 | 9504.109523 | 6465.11867  |   |
| 7239.970975    |                |             |             |             |   |
| NT5DC1         | NT5DC1         | 2685.44637  | 2530.086214 | 2537.87687  |   |
| 2479.361504    |                |             |             |             |   |
| FAM156A        | FAM156A        | 195.8354995 | 176.0672383 | 140.4975772 |   |
| 168.6907353    |                |             |             |             |   |
| PM20D1         | PM20D1         | 52.08390943 | 4.401680957 | 40.14216491 |   |
| 5.884560532    |                |             |             |             |   |
| TNK1           | TNK1           | 491.6721051 | 396.1512861 | 514.0427228 |   |
| 660.0515397    |                |             |             |             |   |
| PPDPF          | PPDPF          | 643.7571206 | 1456.956397 | 1081.608332 |   |
| 410.9384772    |                |             |             |             |   |
| AVL9           | AVL9           | 1347.931576 | 1283.530167 | 1045.926408 |   |
| 1226.930871    |                |             |             |             |   |
| PROCR          | PROCR          | 38.54209298 | 77.46958485 | 59.09818722 |   |
| 111.8066501    |                |             |             |             |   |

|             |           |             |             |             |   |
|-------------|-----------|-------------|-------------|-------------|---|
| NEBL        | NEBL      | 18.7502074  | 9.683698106 | 71.36384872 |   |
| 40.21116364 |           |             |             |             |   |
| PMF1        | PMF1      | 4625.051158 | 4309.245657 | 3669.662908 |   |
| 4464.419924 |           |             |             |             |   |
| CA5B        | CA5B      | 408.33785   | 496.509612  | 510.6975424 |   |
| 377.5926341 |           |             |             |             |   |
| RNF139      | RNF139    | 3926.085093 | 3452.678543 | 4172.55503  |   |
| 3532.697839 |           |             |             |             |   |
| PDCD10      | PDCD10    | 7425.082129 | 5653.519021 | 6102.724126 |   |
| 5884.560532 |           |             |             |             |   |
| SYNE1       | SYNE1     | 2547.94485  | 3285.414666 | 5169.418792 |   |
| 3818.099025 |           |             |             |             |   |
| PFDN5       | PFDN5     | 5709.438152 | 6966.100283 | 7876.784803 |   |
| 6711.341287 |           |             |             |             |   |
| ANKS4B      | ANKS4B    | 0           | 1.115060136 | 0           |   |
| C1orf43     | C1orf43   | 12909.51779 | 9440.725317 | 12550.00183 |   |
| 10714.80397 |           |             |             |             |   |
| GPR56       | GPR56     | 407.2961718 | 2589.068739 | 151.6481785 |   |
| 607.0904949 |           |             |             |             |   |
| HDLBP       | HDLBP     | 14783.49685 | 13710.35585 | 12990.45059 |   |
| 12594.92106 |           |             |             |             |   |
| STK38       | STK38     | 7171.954329 | 6900.955405 | 5361.209135 |   |
| 4916.550324 |           |             |             |             |   |
| CHEK2       | CHEK2     | 1594.809307 | 1308.17958  | 870.8619664 |   |
| 1138.662463 |           |             |             |             |   |
| OSBPL2      | OSBPL2    | 1582.309169 | 1519.460266 | 2148.720883 |   |
| 1828.136805 |           |             |             |             |   |
| RETSAT      | RETSAT    | 1463.557855 | 1758.031374 | 1339.187224 |   |
| 1381.890965 |           |             |             |             |   |
| OBFC1       | OBFC1     | 3623.998418 | 2674.46135  | 3567.077376 |   |
| 3660.196651 |           |             |             |             |   |
| KIAA0226L   | KIAA0226L |             | 58.33397857 | 203.3576602 | 0 |
| 157.9023743 |           |             |             |             |   |
| FOXP3       | FOXP3     | 7662.584756 | 1653.271368 | 5656.700071 |   |
| 3664.119691 |           |             |             |             |   |
| BAZ1A       | BAZ1A     | 4990.680202 | 4124.375057 | 5754.825363 |   |
| 4139.788334 |           |             |             |             |   |
| EMR2        | EMR2      | 5.208390943 | 404.0743119 | 6.690360818 |   |
| 252.0553428 |           |             |             |             |   |
| IRS2        | IRS2      | 56.25062219 | 70.42689532 | 338.9782814 |   |
| 139.2679326 |           |             |             |             |   |
| SUPT3H      | SUPT3H    | 386.462608  | 507.0736463 | 641.1595784 |   |
| 707.1280239 |           |             |             |             |   |
| C4orf6      | C4orf6    | 0           | 0.880336191 | 0.980760089 |   |
| KLF11       | KLF11     | 828.13416   | 958.6861125 | 1050.386648 |   |
| 764.9928692 |           |             |             |             |   |
| PKDREJ      | PKDREJ    | 0           | 1.760672383 | 2.942280266 |   |
| BTN3A2      | BTN3A2    | 1743.769288 | 2333.771244 | 6419.401204 |   |
| 3961.289998 |           |             |             |             |   |
| CPAMD8      | CPAMD8    | 13.54181645 | 8.803361914 | 1.115060136 |   |

|             |         |             |             |             |             |
|-------------|---------|-------------|-------------|-------------|-------------|
| 5.884560532 |         |             |             |             |             |
| PIK3R2      | PIK3R2  | 1336.473116 | 1065.206792 | 1440.657696 |             |
| 1574.119942 |         |             |             |             |             |
| WIBG        | WIBG    | 3977.127324 | 3145.441212 | 2470.973262 |             |
| 2685.321123 |         |             |             |             |             |
| LSS         | LSS     | 1167.72125  | 1782.680788 | 1539.898048 |             |
| 1743.791438 |         |             |             |             |             |
| FAM104B     | FAM104B | 609.3817404 | 584.5432311 | 550.8397073 |             |
| 594.3406137 |         |             |             |             |             |
| PDLIM7      | PDLIM7  | 732.2997667 | 1178.77016  | 580.946331  |             |
| 925.8375237 |         |             |             |             |             |
| ZBTB16      | ZBTB16  | 432.2964483 | 387.3479242 | 246.4282901 |             |
| 433.4959592 |         |             |             |             |             |
| IDH1        | IDH1    | 2447.943743 | 2420.924526 | 1574.464912 |             |
| 2160.614475 |         |             |             |             |             |
| CIDEB       | CIDEB   | 1116.679018 | 1584.605145 | 990.173401  |             |
| 1819.309964 |         |             |             |             |             |
| CPNE7       | CPNE7   | 114.5846008 | 402.3136395 | 57.98312709 |             |
| 250.0938226 |         |             |             |             |             |
| ZSCAN26     | ZSCAN26 | 829.1758382 | 465.6978453 | 1306.85048  |             |
| 1009.202131 |         |             |             |             |             |
| DPF1        | DPF1    | 14.58349464 | 9.683698106 | 12.2656615  |             |
| 11.76912106 |         |             |             |             |             |
| CTXN1       | CTXN1   | 3.125034566 | 7.042689532 | 0           | 1.961520177 |
| TCEAL7      | TCEAL7  | 0           | 0           | 0.980760089 |             |
| NMRK1       | NMRK1   | 1392.723738 | 2739.606228 | 1663.669723 |             |
| 2694.147964 |         |             |             |             |             |
| P4HA2       | P4HA2   | 945.8437953 | 557.2528092 | 384.695747  |             |
| 527.6489277 |         |             |             |             |             |
| SMN1        | SMN1    | 2141.690356 | 1145.317385 | 1977.001622 |             |
| 1428.967449 |         |             |             |             |             |
| PCBP4       | PCBP4   | 333.3370204 | 693.7049189 | 267.6144327 |             |
| 518.8220869 |         |             |             |             |             |
| SLC24A4     | SLC24A4 | 0           | 4.401680957 | 0           | 0           |
| PIK3CB      | PIK3CB  | 1117.720696 | 1751.869021 | 1626.872739 |             |
| 1856.578848 |         |             |             |             |             |
| DMAP1       | DMAP1   | 2702.113221 | 2039.738956 | 2002.648005 |             |
| 1901.693812 |         |             |             |             |             |
| WDR6        | WDR6    | 9244.893925 | 9780.535087 | 8801.169656 |             |
| 10750.11133 |         |             |             |             |             |
| AHSA1       | AHSA1   | 12016.79958 | 9605.348185 | 11477.31398 |             |
| 11145.35765 |         |             |             |             |             |
| ENTPD3      | ENTPD3  | 8.33342551  | 5.282017149 | 6.690360818 |             |
| 15.69216142 |         |             |             |             |             |
| SEC22B      | SEC22B  | 4789.636312 | 5531.152291 | 4970.938087 |             |
| 4863.58928  |         |             |             |             |             |
| HHEX        | HHEX    | 15.62517283 | 70.42689532 | 5.575300681 |             |
| 18.63444168 |         |             |             |             |             |
| SRGN        | SRGN    | 19245.00454 | 30759.82687 | 16798.38095 |             |
| 21311.91673 |         |             |             |             |             |

|             |             |             |             |             |
|-------------|-------------|-------------|-------------|-------------|
| DAG1        | DAG1        | 352.0872278 | 552.8511282 | 498.4318809 |
| 357.9774324 |             |             |             |             |
| CMTM2       | CMTM2       | 8.33342551  | 3.521344766 | 1.115060136 |
| 13.73064124 |             |             |             |             |
| UIMC1       | UIMC1       | 1551.058823 | 1520.340603 | 1721.65285  |
| 1707.503314 |             |             |             |             |
| GNPAT       | GNPAT       | 6654.240269 | 5013.51461  | 5289.845286 |
| 5095.048661 |             |             |             |             |
| ADK         | ADK         | 5543.81132  | 4669.303159 | 3825.771328 |
| 4731.186668 |             |             |             |             |
| PAFAH2      | PAFAH2      | 1757.311104 | 1271.20546  | 1529.862507 |
| 1188.681227 |             |             |             |             |
| TESK1       | TESK1       | 762.5084341 | 1172.607807 | 965.642078  |
| 1089.624459 |             |             |             |             |
| TACC1       | TACC1       | 11515.75238 | 14103.86612 | 8835.73652  |
| 10923.70587 |             |             |             |             |
| LRRN2       | LRRN2       | 40.62544936 | 59.86286102 | 1.115060136 |
| 12.74988115 |             |             |             |             |
| VRK2        | VRK2        | 3059.40884  | 2475.50537  | 2388.458812 |
| 2515.649627 |             |             |             |             |
| RAB3GAP2    | RAB3GAP2    |             | 4018.794452 | 4309.245657 |
| 3389.782814 | 3286.527057 |             |             |             |
| SLC22A18AS  | SLC22A18AS  |             | 31.25034566 | 61.6235334  |
| 24.531323   | 53.94180488 |             |             |             |
| IL4I1       | IL4I1       | 1821.895152 | 1717.535909 | 2506.655186 |
| 4194.710899 |             |             |             |             |
| FDXR        | FDXR        | 3920.876702 | 1659.433721 | 2701.79071  |
| 1534.889539 |             |             |             |             |
| PPP2R1B     | PPP2R1B     | 10995.95496 | 9379.98212  | 6358.072897 |
| 7621.486649 |             |             |             |             |
| ZNF532      | ZNF532      | 42.70880574 | 122.3667306 | 179.5246819 |
| 121.614251  |             |             |             |             |
| EIF1AY      | EIF1AY      | 0           | 5963.397361 | 0           |
| 4536.01541  |             |             |             |             |
| SEC24B      | SEC24B      | 4070.878361 | 4204.48565  | 5143.772409 |
| 4709.609946 |             |             |             |             |
| CDRT1       | CDRT1       | 5.208390943 | 17.60672383 | 14.49578177 |
| 13.73064124 |             |             |             |             |
| SYT9        | SYT9        | 3.125034566 | 0           | 0           |
| 1008.014363 |             |             |             |             |
| ZNF48       | ZNF48       | 1219.805159 | 1842.543649 | 1008.014363 |
| 1314.218519 |             |             |             |             |
| NFKBIB      | NFKBIB      | 1714.602299 | 2125.131566 | 1353.683005 |
| 1631.984788 |             |             |             |             |
| ABTB1       | ABTB1       | 745.8415831 | 1022.070318 | 1732.803452 |
| 1438.77505  |             |             |             |             |
| CYB561D1    | CYB561D1    |             | 536.4642672 | 903.2249324 |
| 1100.564354 | 1016.067452 |             |             |             |
| SYT7        | SYT7        | 0           | 0           | 2.942280266 |
| 166.1439603 |             |             |             |             |
| GPR146      | GPR146      | 663.5490062 | 299.3143051 | 166.1439603 |
| 263.8244639 |             |             |             |             |
| GLCCI1      | GLCCI1      | 1092.72042  | 1718.416246 | 1519.826966 |

|             |            |             |             |             |
|-------------|------------|-------------|-------------|-------------|
| 2320.47837  |            |             |             |             |
| CABLES1     | CABLES1    | 867.7179312 | 797.5845894 | 253.1186509 |
| 275.5935849 |            |             |             |             |
| TAS1R1      | TAS1R1     | 0           | 2.641008574 | 0           |
| KRR1        | KRR1       | 5605.270333 | 5021.437636 | 4688.827873 |
| 4791.013033 |            |             |             |             |
| CACYBP      | CACYBP     | 27709.6815  | 20241.57005 | 19880.40717 |
| 19441.60724 |            |             |             |             |
| OS9         | OS9        | 4308.380988 | 4781.986192 | 3806.815305 |
| 3556.236082 |            |             |             |             |
| CCDC150     | CCDC150    | 303.1283529 | 316.9210289 | 80.28432981 |
| 262.8437038 |            |             |             |             |
| KREMEN1     | KREMEN1    | 11.45846008 | 17.60672383 | 88.08975076 |
| 25.49976231 |            |             |             |             |
| IGF1        | IGF1       | 11.45846008 | 9.683698106 | 20.07108245 |
| 4.903800443 |            |             |             |             |
| ZFYVE16     | ZFYVE16    | 615.6318095 | 809.0289599 | 770.5065542 |
| 768.9159095 |            |             |             |             |
| CD6         | CD6        | 15900.17587 | 15434.05411 | 19795.6626  |
| 27499.53213 |            |             |             |             |
| SMARCD1     | SMARCD1    | 671.8824317 | 1594.288843 | 884.2426881 |
| 725.7624656 |            |             |             |             |
| VAMP4       | VAMP4      | 1932.31304  | 1483.366483 | 2136.455221 |
| 1558.427781 |            |             |             |             |
| VAMP8       | VAMP8      | 7497.999602 | 5421.110267 | 5676.771154 |
| 5553.063622 |            |             |             |             |
| SLC4A4      | SLC4A4     | 11.45846008 | 12.32470668 | 1.115060136 |
| 17.6536816  |            |             |             |             |
| LCP1        | LCP1       | 200588.6771 | 184234.9975 | 133234.0754 |
| 182976.4867 |            |             |             |             |
| FARSA       | FARSA      | 16135.59514 | 10236.54923 | 11611.1212  |
| 12109.44481 |            |             |             |             |
| DLGAP1-AS2  | DLGAP1-AS2 |             | 29.16698928 | 14.08537906 |
| 31.22168382 |            | 21.57672195 |             |             |
| SNHG22      | SNHG22     | 4.166712755 | 5.282017149 | 27.87650341 |
| 15.69216142 |            |             |             |             |
| FAP         | FAP        | 2.083356377 | 0.880336191 | 0           |
| KRTAP3-2    | KRTAP3-2   |             | 0           | 0.980760089 |
| GOLGB1      | GOLGB1     | 2510.444435 | 2790.665727 | 3135.549103 |
| 2348.920412 |            |             |             |             |
| XKR5        | XKR5       | 2.083356377 | 7.042689532 | 0           |
| MCOLN3      | MCOLN3     | 47.91719668 | 25.52974955 | 1.961520177 |
| 5.884560532 |            |             |             | 43.48734531 |
| OGDH        | OGDH       | 3782.333503 | 7985.529593 | 2865.70455  |
| 3326.738221 |            |             |             |             |
| SRL         | SRL        | 0           | 2.641008574 | 2.230120273 |
| RNF24       | RNF24      | 1179.17971  | 780.8582018 | 0.980760089 |
| 1051.374815 |            |             |             | 2000.417884 |
| DPP8        | DPP8       | 4196.921422 | 3575.92561  | 3621.715323 |
| 3476.794514 |            |             |             |             |

|             |             |             |             |             |
|-------------|-------------|-------------|-------------|-------------|
| MAP2K7      | MAP2K7      | 30.20866747 | 259.6991765 | 56.86806695 |
| 48.05724434 |             |             |             |             |
| IFT122      | IFT122      | 1338.556472 | 1154.120747 | 1039.236047 |
| 1059.220896 |             |             |             |             |
| CITED4      | CITED4      | 86.45928966 | 27.29042193 | 287.6855152 |
| 156.9216142 |             |             |             |             |
| ZNF418      | ZNF418      | 54.16726581 | 60.74319721 | 78.05420954 |
| 69.6339663  |             |             |             |             |
| ZBED2       | ZBED2       | 22370.0391  | 27102.02999 | 26830.577   |
| 54473.37684 |             |             |             |             |
| ZFP90       | ZFP90       | 693.7576737 | 1102.180912 | 1721.65285  |
| 1949.751056 |             |             |             |             |
| SLC25A38    | SLC25A38    |             | 4740.677437 | 2895.425734 |
| 4912.95496  | 3225.719932 |             |             |             |
| ASB6        | ASB6        | 5318.808831 | 3931.581431 | 4996.584471 |
| 4366.343915 |             |             |             |             |
| WNT2B       | WNT2B       | 3.125034566 | 0.880336191 | 14.49578177 |
| 6.865320621 |             |             |             |             |
| DHDDS       | DHDDS       | 3450.038161 | 2427.967216 | 2658.303365 |
| 2622.552477 |             |             |             |             |
| FAM72D      | FAM72D      | 1541.683719 | 1619.818592 | 913.2342516 |
| 1339.718281 |             |             |             |             |
| PTPRE       | PTPRE       | 1716.685655 | 1730.740952 | 1468.534199 |
| 2295.959368 |             |             |             |             |
| DUSP23      | DUSP23      | 885.4264604 | 903.2249324 | 1102.794475 |
| 1016.067452 |             |             |             |             |
| LUC7L       | LUC7L       | 1625.017974 | 1385.649165 | 1543.243229 |
| 1563.331581 |             |             |             |             |
| FLAD1       | FLAD1       | 6720.907673 | 4156.06716  | 5414.732022 |
| 5069.548898 |             |             |             |             |
| GPX1        | GPX1        | 7996.963455 | 5435.195646 | 5526.238035 |
| 4936.165526 |             |             |             |             |
| MOB3C       | MOB3C       | 1976.063524 | 940.1990525 | 2612.585899 |
| 1882.07861  |             |             |             |             |
| CCL15       | CCL15       | 1.041678189 | 0           | 0           |
| LHX1        | LHX1        | 12.50013826 | 77.46958485 | 2.230120273 |
| 14.71140133 |             |             |             |             |
| PHACTR1     | PHACTR1     | 3.125034566 | 8.803361914 | 6.690360818 |
| 16.67292151 |             |             |             |             |
| PTGER3      | PTGER3      | 10.41678189 | 4.401680957 | 0           |
| PTCRA       | PTCRA       | 1.041678189 | 0           | 0           |
| BDH2        | BDH2        | 977.094141  | 1020.309646 | 759.3559528 |
| 898.3762412 |             |             |             |             |
| 8-Sep       | 8-Sep       | 750.0082959 | 576.6202054 | 681.3017433 |
| 514.8990466 |             |             |             |             |
| METAP1      | METAP1      | 4060.46158  | 3743.189486 | 3547.006293 |
| 3671.965772 |             |             |             |             |
| TMEM74      | TMEM74      | 5.208390943 | 0.880336191 | 30.10662368 |
| 1.961520177 |             |             |             |             |
| TMEM130     | TMEM130     | 0           | 0           | 4.903800443 |



|             |             |             |             |             |
|-------------|-------------|-------------|-------------|-------------|
| NIM1K       | NIM1K       | 42.70880574 | 14.96571525 | 22.30120273 |
| 45.11496408 |             |             |             |             |
| RAD23A      | RAD23A      | 10310.53071 | 9077.14647  | 8398.632946 |
| 9195.606591 |             |             |             |             |
| MARCKSL1    | MARCKSL1    |             | 1385.431991 | 4207.126659 |
| 1799.70706  | 2639.225399 |             |             |             |
| GPR34       | GPR34       | 483.3386796 | 477.1422158 | 173.9493813 |
| 125.5372913 |             |             |             |             |
| MOV10L1     | MOV10L1     | 2.083356377 | 0           | 0           |
| CDK2AP2     | CDK2AP2     | 11409.5012  | 11485.74629 | 8543.590764 |
| 10557.88235 |             |             |             |             |
| KIAA0895    | KIAA0895    |             | 270.8363291 | 348.6131318 |
| 201.8258847 | 244.2092621 |             |             |             |
| KLK6        | KLK6        | 0           | 0           | 1.961520177 |
| PRSS2       | PRSS2       | 0           | 5.282017149 | 0           |
| CETN2       | CETN2       | 833.342551  | 795.8239171 | 698.0276453 |
| 761.0698288 |             |             |             |             |
| SLBP        | SLBP        | 18169.99265 | 13671.62105 | 12359.32655 |
| 11848.56263 |             |             |             |             |
| BRAF        | BRAF        | 384.3792516 | 632.9617216 | 643.3896986 |
| 629.6479769 |             |             |             |             |
| BPHL        | BPHL        | 553.1311182 | 419.0400271 | 481.7059789 |
| 578.6484523 |             |             |             |             |
| ZNF670      | ZNF670      | 276.04472   | 286.1092622 | 438.2186336 |
| 440.3612798 |             |             |             |             |
| MRPL54      | MRPL54      | 2645.862599 | 1900.645837 | 1606.801656 |
| 1214.18099  |             |             |             |             |
| CHST14      | CHST14      | 70.83411683 | 209.5200136 | 35.68192436 |
| 73.55700665 |             |             |             |             |
| NOTCH1      | NOTCH1      | 793.7587798 | 3219.389452 | 1260.017954 |
| 1517.235857 |             |             |             |             |
| GDPD2       | GDPD2       | 0           | 2.641008574 | 20.07108245 |
| 1-Sep       | 1-Sep       | 11848.04772 | 13429.5286  | 6424.976505 |
| 9098.511343 |             |             |             |             |
| PARD6B      | PARD6B      | 53.12558762 | 135.5717735 | 305.5264773 |
| 129.4603317 |             |             |             |             |
| EXOSC7      | EXOSC7      | 3733.374628 | 2659.495634 | 2708.481071 |
| 3254.161974 |             |             |             |             |
| MIR4292     | MIR4292     | 6.250069132 | 16.72638764 | 6.690360818 |
| 2.942280266 |             |             |             |             |
| QS0X1       | QS0X1       | 606.2567058 | 1302.017227 | 798.3830576 |
| 1371.102604 |             |             |             |             |
| ALG11       | ALG11       | 1765.64453  | 1514.178249 | 2201.128709 |
| 1574.119942 |             |             |             |             |
| MEN1        | MEN1        | 3198.993717 | 3254.6029   | 3712.035194 |
| 4332.017312 |             |             |             |             |
| STAMBPL1    | STAMBPL1    |             | 2705.238256 | 1611.01523  |
| 2662.763605 | 2658.8406   |             |             |             |
| USP35       | USP35       | 144.7932682 | 194.5542983 | 154.9933589 |
| 158.8831344 |             |             |             |             |

|             |         |               |               |               |
|-------------|---------|---------------|---------------|---------------|
| NELFCD      | NELFCD  | 8806.347407   | 5590.134816   | 7604.710129   |
| 7454.757434 |         |               |               |               |
| CDKN1A      | CDKN1A  | 21061.6913    | 6466.949662   | 11117.14956   |
| 7222.317293 |         |               |               |               |
| MAP2        | MAP2    | 3.125034566   | 4.401680957   | 0 25.49976231 |
| HNRNPU      | HNRNPU  | 59230.86349   | 53244.49353   | 46070.93965   |
| 55326.63812 |         |               |               |               |
| TSHR        | TSHR    | 40.62544936   | 568.6971797   | 40.14216491   |
| 90.22992816 |         |               |               |               |
| EPGN        | EPGN    | 21.87524196   | 11.44437049   | 36.7969845    |
| 2.942280266 |         |               |               |               |
| PHF19       | PHF19   | 6517.780427   | 8037.469428   | 2624.851561   |
| 3115.874802 |         |               |               |               |
| NTMT1       | NTMT1   | 3559.414371   | 2788.024718   | 3400.933416   |
| 3113.913282 |         |               |               |               |
| ABCA8       | ABCA8   | 0 0           | 0 0.980760089 |               |
| UBL7        | UBL7    | 5352.142534   | 4514.36399    | 4165.864669   |
| 4409.497359 |         |               |               |               |
| BLOC1S5     | BLOC1S5 | 2301.067119   | 1928.816595   | 2853.438889   |
| 2423.458179 |         |               |               |               |
| SSC5D       | SSC5D   | 7.291747321   | 2.641008574   | 4.460240545   |
| 3.923040355 |         |               |               |               |
| IFIT5       | IFIT5   | 1990.647019   | 1012.38662    | 8319.463677   |
| 3124.701642 |         |               |               |               |
| FSCN2       | FSCN2   | 1.041678189   | 2.641008574   | 0 0           |
| INMT        | INMT    | 5.208390943   | 5.282017149   | 27.87650341   |
| 3.923040355 |         |               |               |               |
| DDX18       | DDX18   | 5682.354519   | 4639.371729   | 7736.287225   |
| 6839.820858 |         |               |               |               |
| NCAM2       | NCAM2   | 6.250069132   | 0 0           | 6.865320621   |
| NDUFA1      | NDUFA1  | 10794.91107   | 11895.10262   | 9447.904535   |
| 9120.088065 |         |               |               |               |
| KRT17       | KRT17   | 37.50041479   | 9.683698106   | 65.78854804   |
| 6.865320621 |         |               |               |               |
| COX6C       | COX6C   | 14509.53549   | 18152.53227   | 12116.24344   |
| 12839.13032 |         |               |               |               |
| ADAR        | ADAR    | 25658.61714   | 31032.73108   | 43586.58567   |
| 29335.51501 |         |               |               |               |
| SLC15A2     | SLC15A2 | 31.25034566   | 87.15328295   | 42.37228518   |
| 35.30736319 |         |               |               |               |
| CLDN9       | CLDN9   | 0 2.641008574 | 0 0           | 0             |
| COQ2        | COQ2    | 1031.261407   | 1315.22227    | 1035.890867   |
| 1402.486927 |         |               |               |               |
| SGSM3       | SGSM3   | 3511.497174   | 3644.591833   | 2399.609413   |
| 4267.287146 |         |               |               |               |
| ADAMTS7     | ADAMTS7 | 2.083356377   | 7.042689532   | 0 0.980760089 |
| SLC38A4     | SLC38A4 | 0 5.282017149 | 0 0           | 3.923040355   |
| H1F0        | H1F0    | 143.75159     | 392.6299414   | 450.4842951   |
| 360.9197126 |         |               |               |               |
| GZMM        | GZMM    | 630.2153042   | 741.2430732   | 611.0529547   |

|                   |               |             |               |  |  |
|-------------------|---------------|-------------|---------------|--|--|
| 854.2420372       |               |             |               |  |  |
| GRPR GRPR         | 3.125034566   | 6.16235334  | 28.99156354   |  |  |
| 3.923040355       |               |             |               |  |  |
| PDIA3 PDIA3       | 29111.78034   | 24196.04022 | 41735.58584   |  |  |
| 35045.50025       |               |             |               |  |  |
| CYSLTR2 CYSLTR2   | 33.33370204   | 36.97412004 | 161.6837198   |  |  |
| 110.82589         |               |             |               |  |  |
| ATG13 ATG13       | 8167.798678   | 6687.03371  | 7664.923377   |  |  |
| 7080.10708        |               |             |               |  |  |
| SBN02 SBN02       | 407.2961718   | 2457.898646 | 490.62646     |  |  |
| 698.3011831       |               |             |               |  |  |
| SLC8A2 SLC8A2     | 0 0.880336191 | 5.575300681 | 2.942280266   |  |  |
| EBP EBP           | 15659.54821   | 8817.447293 | 6679.210216   |  |  |
| 6544.612072       |               |             |               |  |  |
| CLDN16 CLDN16     | 0 1.760672383 | 0           | 0             |  |  |
| GNA13 GNA13       | 6946.95184    | 9460.092713 | 8480.032336   |  |  |
| 6991.838672       |               |             |               |  |  |
| FARS2 FARS2       | 1792.728163   | 1831.979614 | 1417.241433   |  |  |
| 2092.942029       |               |             |               |  |  |
| SKIL SKIL         | 805.2172399   | 879.4558552 | 1322.461322   |  |  |
| 873.857239        |               |             |               |  |  |
| PALM3 PALM3       | 3.125034566   | 3.521344766 | 0 0.980760089 |  |  |
| CLTCL1 CLTCL1     | 13.54181645   | 29.05109432 | 55.75300681   |  |  |
| 56.88408514       |               |             |               |  |  |
| CD9 CD9           | 1397.932129   | 2059.986688 | 519.6180235   |  |  |
| 1167.104506       |               |             |               |  |  |
| ST3GAL2 ST3GAL2   | 1771.894599   | 2667.41866  | 1593.420935   |  |  |
| 1846.771247       |               |             |               |  |  |
| USP11 USP11       | 3159.409946   | 4004.649335 | 8657.326898   |  |  |
| 5753.13868        |               |             |               |  |  |
| PNPLA4 PNPLA4     | 690.6326391   | 453.3731386 | 589.8668121   |  |  |
| 472.7263627       |               |             |               |  |  |
| PRH2 PRH2         | 0 4.401680957 | 10.03554123 | 0             |  |  |
| HIST1H3I HIST1H3I | 18.7502074    | 92.4353001  |               |  |  |
| 13.38072164       | 15.69216142   |             |               |  |  |
| HIST1H3E HIST1H3E | 35.41705842   | 7.923025723 |               |  |  |
| 28.99156354       | 8.826840798   |             |               |  |  |
| JMJD4 JMJD4       | 2183.357484   | 1951.705336 | 2255.766656   |  |  |
| 2445.034901       |               |             |               |  |  |
| MCPH1 MCPH1       | 2041.68925    | 1977.235086 | 2158.756424   |  |  |
| 2175.325877       |               |             |               |  |  |
| MYD88 MYD88       | 16492.89076   | 11118.6461  | 12597.94942   |  |  |
| 10902.12915       |               |             |               |  |  |
| CASP10 CASP10     | 1744.810966   | 1281.769495 | 1433.967335   |  |  |
| 725.7624656       |               |             |               |  |  |
| TEC TEC           | 42.70880574   | 67.78588674 | 194.0204637   |  |  |
| 205.9596186       |               |             |               |  |  |
| SECISBP2 SECISBP2 | 2230.233002   | 2326.728554 |               |  |  |
| 2693.985289       | 2357.747253   |             |               |  |  |
| SEPP1 SEPP1       | 63.54236951   | 132.9307649 | 198.4807043   |  |  |

|             |           |             |             |             |             |
|-------------|-----------|-------------|-------------|-------------|-------------|
| 164.7676949 |           |             |             |             |             |
| EWSR1       | EWSR1     | 55425.61306 | 39886.27216 | 36386.64237 |             |
| 39180.38478 |           |             |             |             |             |
| DNAJC5B     | DNAJC5B   | 9.375103698 | 6.16235334  | 33.45180409 |             |
| 10.78836098 |           |             |             |             |             |
| CD209       | CD209     | 0           | 0           | 1.115060136 | 0           |
| EYA2        | EYA2      | 6.250069132 | 4.401680957 | 0           | 0           |
| FCGR3A      | FCGR3A    | 0           | 7.042689532 | 14.49578177 | 7.846080709 |
| ULK4P2      | ULK4P2    | 0           | 2.641008574 | 0           | 0           |
| TMP0-AS1    | TMP0-AS1  |             | 2427.11018  | 2561.778317 |             |
| 1411.666133 |           | 1677.099752 |             |             |             |
| INTS4L2     | INTS4L2   | 8.33342551  | 6.16235334  | 6.690360818 |             |
| 8.826840798 |           |             |             |             |             |
| SMG1P1      | SMG1P1    | 458.338403  | 605.6712997 | 475.015618  |             |
| 652.205459  |           |             |             |             |             |
| RPL21P44    | RPL21P44  |             | 3.125034566 | 1.760672383 |             |
| 23.41626286 |           | 11.76912106 |             |             |             |
| LINC00469   | LINC00469 |             | 0           | 2.641008574 | 23.41626286 |
| 0           |           |             |             |             |             |
| ECE1        | ECE1      | 5164.64046  | 5978.363076 | 8127.673333 |             |
| 8011.829164 |           |             |             |             |             |
| SLFN14      | SLFN14    | 3.125034566 | 22.00840479 | 5.575300681 |             |
| 2.942280266 |           |             |             |             |             |
| PTCH1       | PTCH1     | 14.58349464 | 62.50386959 | 228.5873279 |             |
| 105.9220896 |           |             |             |             |             |
| ABLIM2      | ABLIM2    | 9.375103698 | 13.20504287 | 16.72590204 |             |
| 47.07648426 |           |             |             |             |             |
| LTB4R2      | LTB4R2    | 268.7529727 | 309.8783394 | 195.1355238 |             |
| 437.4189995 |           |             |             |             |             |
| PRKACA      | PRKACA    | 117.7096353 | 288.7502708 | 100.3554123 |             |
| 101.0182891 |           |             |             |             |             |
| SORT1       | SORT1     | 186.4603958 | 186.6312726 | 100.3554123 |             |
| 47.07648426 |           |             |             |             |             |
| RAB27A      | RAB27A    | 6690.699006 | 13276.3501  | 4902.919419 |             |
| 9048.492578 |           |             |             |             |             |
| FIG4        | FIG4      | 2054.189388 | 1666.47641  | 1520.942026 |             |
| 1954.654857 |           |             |             |             |             |
| SPIN2B      | SPIN2B    | 197.9188559 | 194.5542983 | 137.1523968 |             |
| 197.1327778 |           |             |             |             |             |
| GJB3        | GJB3      | 0           | 0           | 1.961520177 |             |
| LRRC66      | LRRC66    | 3.125034566 | 7.042689532 | 0           | 8.826840798 |
| C1orf53     | C1orf53   | 46.87551849 | 31.69210289 | 57.98312709 |             |
| 22.55748204 |           |             |             |             |             |
| MAGIX       | MAGIX     | 50.00055306 | 32.57243908 | 94.78011158 |             |
| 26.48052239 |           |             |             |             |             |
| ZNF285      | ZNF285    | 54.16726581 | 36.97412004 | 21.18614259 |             |
| 88.26840798 |           |             |             |             |             |
| CPT1C       | CPT1C     | 30.20866747 | 1.760672383 | 25.64638313 |             |
| 12.74988115 |           |             |             |             |             |
| AXL         | AXL       | 15.62517283 | 4.401680957 | 147.187938  |             |

|              |              |             |             |             |             |
|--------------|--------------|-------------|-------------|-------------|-------------|
| 35.30736319  |              |             |             |             |             |
| OPN1SW       | OPN1SW       | 64.5840477  | 14.96571525 | 138.2674569 |             |
| 14.71140133  |              |             |             |             |             |
| EIF4A2       | EIF4A2       | 5881.315053 | 4369.988854 | 13634.95535 |             |
| 8628.72726   |              |             |             |             |             |
| ERCC3        | ERCC3        | 6914.659817 | 5129.718988 | 5022.230854 |             |
| 5456.949133  |              |             |             |             |             |
| ATP1B2       | ATP1B2       | 0           | 6.16235334  | 11.15060136 | 5.884560532 |
| LOC101928784 | LOC101928784 |             | 295.8366056 | 258.8188403 |             |
| 424.8379119  |              | 391.3232754 |             |             |             |
| FGF17        | FGF17        | 3.125034566 | 0           | 17.84096218 | 1.961520177 |
| FGF18        | FGF18        | 5.208390943 | 6.16235334  | 0           | 0.980760089 |
| DPM1         | DPM1         | 4681.30178  | 4105.007661 | 4358.770073 |             |
| 3979.92444   |              |             |             |             |             |
| HTR3D        | HTR3D        | 0           | 0           | 7.805420954 | 0           |
| SYTL3        | SYTL3        | 3467.74669  | 3309.183744 | 3701.999652 |             |
| 4279.056267  |              |             |             |             |             |
| RPRD1B       | RPRD1B       | 2673.98791  | 2808.272451 | 2551.257592 |             |
| 2154.729915  |              |             |             |             |             |
| HPS5         | HPS5         | 3272.952869 | 2664.777651 | 3674.123149 |             |
| 2345.978132  |              |             |             |             |             |
| MRPS18A      | MRPS18A      | 4799.011415 | 3575.045273 | 3707.574953 |             |
| 3618.023967  |              |             |             |             |             |
| RSPH9        | RSPH9        | 48.95887487 | 32.57243908 | 41.25722504 |             |
| 38.24964346  |              |             |             |             |             |
| TMEM254-AS1  | TMEM254-AS1  |             | 106.2511752 | 95.07630868 |             |
| 154.9933589  |              | 155.9408541 |             |             |             |
| CEP85L       | CEP85L       | 1263.555643 | 1154.120747 | 2154.296183 |             |
| 1514.293577  |              |             |             |             |             |
| C15orf26     | C15orf26     |             | 4.166712755 | 0.880336191 | 0           |
| 1.961520177  |              |             |             |             |             |
| UBA5         | UBA5         | 6421.946033 | 4474.748861 | 4203.776714 |             |
| 6476.939626  |              |             |             |             |             |
| ARID5B       | ARID5B       | 4244.838619 | 5421.990603 | 5409.156721 |             |
| 5849.253169  |              |             |             |             |             |
| ITIH1        | ITIH1        | 0           | 0           | 0.980760089 |             |
| C7orf50      | C7orf50      | 2745.863705 | 2012.448534 | 2973.865383 |             |
| 2646.090719  |              |             |             |             |             |
| RCL1         | RCL1         | 2895.865365 | 3813.616381 | 2906.961775 |             |
| 2611.764116  |              |             |             |             |             |
| HMGCR        | HMGCR        | 3536.497451 | 4788.148545 | 4203.776714 |             |
| 4952.838448  |              |             |             |             |             |
| ESRRG        | ESRRG        | 0           | 0           | 2.230120273 | 0           |
| DPYD         | DPYD         | 2204.191047 | 2061.74736  | 1788.556459 |             |
| 1725.156996  |              |             |             |             |             |
| TPI1         | TPI1         | 115068.9811 | 79263.71    | 77429.77586 |             |
| 111132.8679  |              |             |             |             |             |
| ADAL         | ADAL         | 754.1750086 | 646.1667645 | 780.5420954 |             |
| 580.6099725  |              |             |             |             |             |
| CERKL        | CERKL        | 3055.242127 | 3786.325959 | 1018.049904 |             |

|                 |              |             |             |             |  |
|-----------------|--------------|-------------|-------------|-------------|--|
| 1186.719707     |              |             |             |             |  |
| NR3C1 NR3C1     | 2638.570852  | 2491.351422 | 6433.896986 |             |  |
| 4554.649852     |              |             |             |             |  |
| ZNF185 ZNF185   | 170.8352229  | 118.8453858 | 198.4807043 |             |  |
| 176.536816      |              |             |             |             |  |
| LYRM7 LYRM7     | 1706.268873  | 1652.391031 | 2033.869689 |             |  |
| 1903.655332     |              |             |             |             |  |
| ATG4B ATG4B     | 4662.551573  | 4648.175091 | 4432.364042 |             |  |
| 4448.727762     |              |             |             |             |  |
| MAPK1 MAPK1     | 7884.46221   | 7724.95008  | 10373.40445 |             |  |
| 9615.371909     |              |             |             |             |  |
| LOC728819       | LOC728819    | 0           | 5.282017149 | 0           |  |
| 19.61520177     |              |             |             |             |  |
| LOC101927151    | LOC101927151 | 260.4195472 | 493.8686034 |             |  |
| 337.8632213     | 611.9942953  |             |             |             |  |
| TCERG1 TCERG1   | 10178.23758  | 8638.739047 | 9100.005772 |             |  |
| 9145.587827     |              |             |             |             |  |
| MIR1278 MIR1278 | 0            | 0.880336191 | 2.230120273 | 0.980760089 |  |
| NOTCH4 NOTCH4   | 0            | 0           | 1.115060136 | 0.980760089 |  |
| NFATC3 NFATC3   | 14997.04088  | 14927.8608  | 10152.62254 |             |  |
| 10595.15124     |              |             |             |             |  |
| SLC28A3 SLC28A3 | 67.70908227  | 176.9475745 | 98.12529199 |             |  |
| 104.9413295     |              |             |             |             |  |
| MIER1 MIER1     | 3187.535257  | 3669.241246 | 5129.276627 |             |  |
| 3469.929194     |              |             |             |             |  |
| COG2 COG2       | 3493.788645  | 2718.478159 | 3193.53223  |             |  |
| 3280.642497     |              |             |             |             |  |
| VNN2 VNN2       | 212.5023505  | 382.0659071 | 1098.334234 |             |  |
| 804.2232727     |              |             |             |             |  |
| SLC7A8 SLC7A8   | 14.58349464  | 2.641008574 | 60.21324736 |             |  |
| 41.19192372     |              |             |             |             |  |
| DCC DCC         | 0            | 0           | 0           | 0.980760089 |  |
| CTLA4 CTLA4     | 14455.36822  | 11755.12916 | 6810.787312 |             |  |
| 15115.47449     |              |             |             |             |  |
| CSTA CSTA       | 0            | 2.641008574 | 1.115060136 | 0           |  |
| CTTN CTTN       | 84.37593328  | 184.8706002 | 248.6584104 |             |  |
| 550.2064097     |              |             |             |             |  |
| DNAJB5 DNAJB5   | 300.0033183  | 433.1254062 | 346.7837024 |             |  |
| 692.4166226     |              |             |             |             |  |
| BIRC2 BIRC2     | 2763.572235  | 2344.335278 | 3529.165331 |             |  |
| 2956.010907     |              |             |             |             |  |
| BIRC3 BIRC3     | 13674.10958  | 10086.01175 | 14034.14688 |             |  |
| 11986.8498      |              |             |             |             |  |
| DHPS DHPS       | 4185.462962  | 4166.631194 | 4566.171258 |             |  |
| 4500.708047     |              |             |             |             |  |
| MX2 MX2         | 1658.351676  | 950.7630868 | 6277.788567 |             |  |
| 1770.27196      |              |             |             |             |  |
| AGFG1 AGFG1     | 9063.64192   | 7312.072406 | 8321.693797 |             |  |
| 8757.206832     |              |             |             |             |  |
| NKX2-5 NKX2-5   | 0            | 1.760672383 | 0           | 0           |  |

|             |             |             |             |
|-------------|-------------|-------------|-------------|
| C11orf91    | C11orf91    | 9.375103698 | 3.521344766 |
| 16.72590204 | 11.76912106 |             |             |
| AR          | AR          | 0           | 0           |
| CDKN1C      | CDKN1C      | 0           | 18.48706002 |
| ACSL3       | ACSL3       | 4546.925294 | 5083.061169 |
| 5512.852458 |             |             | 5849.605475 |
| RAPH1       | RAPH1       | 45.8338403  | 80.99092961 |
| 161.8254146 |             |             | 23.41626286 |
| CTAGE5      | CTAGE5      | 2602.112115 | 2774.819675 |
| 2450.919462 |             |             | 2119.729319 |
| EEF1D       | EEF1D       | 8077.172675 | 8101.73397  |
| 8649.323222 |             |             | 9601.782833 |
| NASP        | NASP        | 11877.21471 | 12616.9783  |
| 11020.80112 |             |             | 8705.274484 |
| TUBD1       | TUBD1       | 1005.219452 | 947.241742  |
| 836.5883556 |             |             | 1129.555918 |
| CSRP1       | CSRP1       | 6742.782915 | 6221.335865 |
| 4566.418973 |             |             | 3741.026757 |
| ENY2        | ENY2        | 5296.93359  | 5171.975125 |
| 4449.708522 |             |             | 4431.248982 |
| KLRD1       | KLRD1       | 250.0027653 | 35.21344766 |
| 128.4795716 |             |             | 226.3572077 |
| LGALS1      | LGALS1      | 15541.83858 | 23033.11611 |
| 8974.935571 |             |             | 3163.425607 |
| RPSA        | RPSA        | 18019.99099 | 17320.61457 |
| 16088.38849 |             |             | 17312.42368 |
| NPR3        | NPR3        | 1.041678189 | 0           |
| LY86        | LY86        | 14.58349464 | 16.72638764 |
| 43.1534439  |             |             | 93.66505145 |
| MED17       | MED17       | 4111.503811 | 2986.980698 |
| 3556.236082 |             |             | 4146.908647 |
| CHST2       | CHST2       | 1882.312487 | 1688.484815 |
| 1026.855813 |             |             | 732.5945095 |
| FADS2       | FADS2       | 129.1680954 | 689.3032379 |
| 410.9384772 |             |             | 113.7361339 |
| SETMAR      | SETMAR      | 702.0910992 | 675.2178588 |
| 653.1862191 |             |             | 777.196915  |
| SYNGR3      | SYNGR3      | 661.4656498 | 1011.506284 |
| 1082.759138 |             |             | 565.3354891 |
| NEURL1      | NEURL1      | 111.4595662 | 360.0575023 |
| 277.5551051 |             |             | 151.6481785 |
| RPP38       | RPP38       | 1502.099948 | 1302.017227 |
| 1673.176711 |             |             | 1784.096218 |
| RPP30       | RPP30       | 3716.707777 | 3482.609973 |
| 3917.155794 |             |             | 3989.685168 |
| MATN2       | MATN2       | 3.125034566 | 26.41008574 |
| 34.3266031  |             |             | 12.2656615  |
| SCAMP1      | SCAMP1      | 1410.432268 | 1272.085797 |
| 1228.892391 |             |             | 2367.272669 |
| CD83        | CD83        | 2843.781455 | 931.3956905 |
|             |             |             | 4413.408019 |

|                 |               |             |             |             |
|-----------------|---------------|-------------|-------------|-------------|
| 3229.642972     |               |             |             |             |
| HLA-DPB1        | HLA-DPB1      |             | 1323.972978 | 155.8195059 |
| 692.4523446     | 87.28764789   |             |             |             |
| S1PR2 S1PR2     | 243.7526962   |             | 358.2968299 | 291.0306956 |
| 370.7273135     |               |             |             |             |
| FOXJ3 FOXJ3     | 2811.489431   |             | 3495.815016 | 4786.953165 |
| 4137.826814     |               |             |             |             |
| LAMP2 LAMP2     | 10443.86552   |             | 9112.359918 | 10290.89    |
| 7386.104228     |               |             |             |             |
| CTCF CTCF       | 5401.101408   |             | 4665.781815 | 4449.089944 |
| 3777.887862     |               |             |             |             |
| FAM109A FAM109A | 57.29230038   |             | 55.46118006 | 144.9578177 |
| 78.46080709     |               |             |             |             |
| GNE GNE         | 829.1758382   |             | 1398.854208 | 1037.005927 |
| 968.0102075     |               |             |             |             |
| HELQ HELQ       | 1273.972425   |             | 923.4726648 | 1694.891407 |
| 1245.565313     |               |             |             |             |
| GST01 GST01     | 9658.440166   |             | 8253.151795 | 7397.308944 |
| 7594.025367     |               |             |             |             |
| LTA LTA         | 4.166712755   | 0           | 10.03554123 | 3.923040355 |
| FXYD6 FXYD6     | 0 0           | 21.18614259 | 0           |             |
| FANCD20S        | FANCD20S      | 156.2517283 | 241.2121165 |             |
| 147.187938      | 135.3448922   |             |             |             |
| CCHCR1 CCHCR1   | 64.5840477    |             | 143.4947992 | 69.13372845 |
| 154.960094      |               |             |             |             |
| BZRAP1 BZRAP1   | 112.5012444   |             | 634.722394  | 150.5331184 |
| 247.1515423     |               |             |             |             |
| ATP2A3 ATP2A3   | 4559.425432   |             | 12433.86837 | 3423.234618 |
| 4559.553652     |               |             |             |             |
| FAM129C FAM129C | 2.083356377   |             | 3.521344766 | 15.61084191 |
| 1.961520177     |               |             |             |             |
| DSN1 DSN1       | 3802.125389   |             | 3028.356499 | 2591.399757 |
| 2727.493807     |               |             |             |             |
| PIGX PIGX       | 5109.431516   |             | 4670.183496 | 2846.748528 |
| 3652.35057      |               |             |             |             |
| PLIN1 PLIN1     | 0 1.760672383 | 0           |             | 1.961520177 |
| PLD3 PLD3       | 1759.394461   |             | 1955.226681 | 2293.6787   |
| 1927.193574     |               |             |             |             |
| SHB SHB         | 16.66685102   |             | 44.01680957 | 30.10662368 |
| 57.86484523     |               |             |             |             |
| SRSF3 SRSF3     | 30373.25263   |             | 26897.79199 | 27491.80766 |
| 25508.58915     |               |             |             |             |
| RGPD5 RGPD5     | 307.2950657   |             | 233.2890907 | 296.6059962 |
| 288.3434661     |               |             |             |             |
| CBX3 CBX3       | 16000.17698   |             | 13091.4795  | 11443.86218 |
| 13816.94813     |               |             |             |             |
| SEBOX SEBOX     | 0 3.521344766 | 0           |             | 0           |
| SLC35B3 SLC35B3 | 1353.139967   |             | 954.2844315 | 1286.779397 |
| 1041.567214     |               |             |             |             |
| ENTPD4 ENTPD4   | 2556.278275   |             | 3352.320217 | 2782.07504  |



|             |          |             |             |             |             |
|-------------|----------|-------------|-------------|-------------|-------------|
| 2860.877179 |          |             |             |             |             |
| NFASC       | NFASC    | 0           | 9.683698106 | 1.115060136 | 9.807600887 |
| ZNF668      | ZNF668   | 1117.720696 | 989.4978792 | 792.8077569 |             |
| 957.2218465 |          |             |             |             |             |
| RAB40C      | RAB40C   | 942.7187608 | 1000.94225  | 981.2529199 |             |
| 1117.085741 |          |             |             |             |             |
| ZFP62       | ZFP62    | 503.1305651 | 645.2864283 | 979.0227996 |             |
| 910.1453623 |          |             |             |             |             |
| PRR29       | PRR29    | 3943.793622 | 2363.702674 | 4345.389351 |             |
| 3100.18264  |          |             |             |             |             |
| NE01        | NE01     | 148.959981  | 444.5697767 | 282.1102145 |             |
| 456.0534412 |          |             |             |             |             |
| WDR46       | WDR46    | 11.45846008 | 386.467588  | 7.805420954 |             |
| 598.2636541 |          |             |             |             |             |
| CMIP        | CMIP     | 23.95859834 | 108.2813515 | 16.72590204 |             |
| 34.3266031  |          |             |             |             |             |
| FLNB        | FLNB     | 3722.957846 | 9056.018401 | 2622.62144  |             |
| 2586.264354 |          |             |             |             |             |
| IGFBP1      | IGFBP1   | 1.041678189 | 0.880336191 | 0           | 0           |
| KCTD7       | KCTD7    | 1092.72042  | 1368.922778 | 997.978822  |             |
| 1147.489304 |          |             |             |             |             |
| BARX2       | BARX2    | 2.083356377 | 2.641008574 | 0           | 0.980760089 |
| OXA1L       | OXA1L    | 5142.765218 | 4981.822507 | 4084.465279 |             |
| 5222.547472 |          |             |             |             |             |
| HDAC9       | HDAC9    | 42.70880574 | 30.8117667  | 173.9493813 |             |
| 200.0750581 |          |             |             |             |             |
| FAM213B     | FAM213B  | 1466.68289  | 1360.999752 | 1629.102859 |             |
| 2446.996421 |          |             |             |             |             |
| IFRD2       | IFRD2    | 8284.466635 | 4866.498466 | 7397.308944 |             |
| 8116.770494 |          |             |             |             |             |
| DUSP11      | DUSP11   | 4687.551849 | 3065.330619 | 4294.096585 |             |
| 4037.789285 |          |             |             |             |             |
| DYRK2       | DYRK2    | 1409.390589 | 2187.635436 | 3749.947238 |             |
| 2712.782405 |          |             |             |             |             |
| CDC16       | CDC16    | 2406.276616 | 2864.613967 | 1973.656441 |             |
| 3043.298555 |          |             |             |             |             |
| UGT3A2      | UGT3A2   | 2.083356377 | 10.5640343  | 4.460240545 |             |
| 11.76912106 |          |             |             |             |             |
| FRS2        | FRS2     | 309.378422  | 434.0057424 | 1102.794475 |             |
| 565.8985712 |          |             |             |             |             |
| STRN3       | STRN3    | 657.2989371 | 933.1563629 | 443.7939342 |             |
| 663.97458   |          |             |             |             |             |
| FAM26D      | FAM26D   | 0           | 0           | 0           | 0.980760089 |
| FOXMI       | FOXMI    | 4961.513213 | 7187.064667 | 2808.836483 |             |
| 3444.429431 |          |             |             |             |             |
| SLC35E2B    | SLC35E2B |             | 1547.933788 | 3590.891325 |             |
| 2013.798606 |          | 3258.085015 |             |             |             |
| WDR83       | WDR83    | 5062.555997 | 4837.447372 | 5147.117589 |             |
| 4928.319446 |          |             |             |             |             |
| SULT1A4     | SULT1A4  | 12.50013826 | 26.41008574 | 14.49578177 |             |

|             |           |             |             |             |             |
|-------------|-----------|-------------|-------------|-------------|-------------|
| 13.73064124 |           |             |             |             |             |
| ANXA2       | ANXA2     | 62775.69436 | 48711.64248 | 18344.96936 |             |
| 25406.5901  |           |             |             |             |             |
| FCH02       | FCH02     | 16.66685102 | 35.21344766 | 35.68192436 |             |
| 86.3068878  |           |             |             |             |             |
| NKRF        | NKRF      | 717.716272  | 1069.608473 | 875.322207  |             |
| 847.3767166 |           |             |             |             |             |
| GYS1        | GYS1      | 5354.22589  | 4791.66989  | 3083.141277 |             |
| 4862.60852  |           |             |             |             |             |
| MID1        | MID1      | 8.33342551  | 0           | 0           | 15.69216142 |
| SYT2        | SYT2      | 6.250069132 | 3.521344766 | 0           | 0.980760089 |
| POMC        | POMC      | 32.29202385 | 88.91395534 | 86.97469063 |             |
| 229.4978607 |           |             |             |             |             |
| SCNN1A      | SCNN1A    | 10.41678189 | 9.683698106 | 17.84096218 |             |
| 19.61520177 |           |             |             |             |             |
| GREB1       | GREB1     | 15.62517283 | 10.5640343  | 32.33674395 |             |
| 3.923040355 |           |             |             |             |             |
| STRIP1      | STRIP1    | 3126.076244 | 2842.605562 | 3870.373733 |             |
| 3248.277414 |           |             |             |             |             |
| FARSB       | FARSB     | 13418.89843 | 8121.981702 | 9592.862352 |             |
| 9400.58545  |           |             |             |             |             |
| PIP4K2B     | PIP4K2B   | 1116.679018 | 2214.925858 | 1359.258306 |             |
| 1943.866496 |           |             |             |             |             |
| ABCC5       | ABCC5     | 820.8424127 | 931.3956905 | 579.8312709 |             |
| 895.433961  |           |             |             |             |             |
| PRSS57      | PRSS57    | 7.291747321 | 0           | 0           | 0           |
| MAD1L1      | MAD1L1    | 2627.112392 | 2409.480156 | 1844.309465 |             |
| 2028.211863 |           |             |             |             |             |
| RPS18       | RPS18     | 0           | 13.20504287 | 2.230120273 | 6.865320621 |
| LAMB1       | LAMB1     | 11.45846008 | 24.64941336 | 33.45180409 |             |
| 6.865320621 |           |             |             |             |             |
| CASC11      | CASC11    | 3.125034566 | 0.880336191 | 17.84096218 |             |
| 6.865320621 |           |             |             |             |             |
| LIPT1       | LIPT1     | 237.502627  | 169.9048849 | 439.3336937 |             |
| 347.1890714 |           |             |             |             |             |
| BSCL2       | BSCL2     | 2989.616402 | 2390.993096 | 2426.370857 |             |
| 1958.577897 |           |             |             |             |             |
| NOL10       | NOL10     | 4317.756092 | 3136.63785  | 3649.591826 |             |
| 3870.07931  |           |             |             |             |             |
| LINC00511   | LINC00511 |             | 3.125034566 | 18.48706002 | 0           |
| 2.942280266 |           |             |             |             |             |
| TSN         | TSN       | 11207.41563 | 8795.438889 | 9420.028031 |             |
| 9977.272382 |           |             |             |             |             |
| SLC43A1     | SLC43A1   | 998.969383  | 1245.675711 | 724.7890886 |             |
| 1187.700467 |           |             |             |             |             |
| NFYA        | NFYA      | 2127.106861 | 2324.967882 | 2561.293133 |             |
| 2319.49761  |           |             |             |             |             |
| TERT        | TERT      | 83.3342551  | 247.3744698 | 26.76144327 |             |
| 144.171733  |           |             |             |             |             |
| CDCA7       | CDCA7     | 8865.723064 | 10537.62421 | 3057.494894 |             |

|             |          |             |             |             |
|-------------|----------|-------------|-------------|-------------|
| 5947.329178 |          |             |             |             |
| ZNF655      | ZNF655   | 5384.434557 | 4951.891077 | 4749.04112  |
| 4893.012082 |          |             |             |             |
| IQSEC1      | IQSEC1   | 1356.265002 | 2860.212286 | 1079.378212 |
| 1697.695713 |          |             |             |             |
| JAKMIP1     | JAKMIP1  | 2170.857345 | 2774.819675 | 822.9143806 |
| 1247.526833 |          |             |             |             |
| FASTKD2     | FASTKD2  | 5778.188913 | 3601.455359 | 6316.815672 |
| 5716.850557 |          |             |             |             |
| CCDC124     | CCDC124  | 3922.960059 | 2721.999504 | 2397.379293 |
| 2651.97528  |          |             |             |             |
| SUCLG2      | SUCLG2   | 3762.541618 | 2966.732965 | 3695.309292 |
| 4113.307812 |          |             |             |             |
| ZNF549      | ZNF549   | 486.4637141 | 572.2185244 | 968.9872584 |
| 868.9534386 |          |             |             |             |
| ALCAM       | ALCAM    | 1165.637893 | 976.2928363 | 1183.078805 |
| 905.2415618 |          |             |             |             |
| PI3         | PI3      | 1.041678189 | 0           | 0           |
| HIVEP3      | HIVEP3   | 1154.179433 | 2015.969878 | 1140.706519 |
| 1414.256048 |          |             |             |             |
| RIC1        | RIC1     | 1448.97436  | 2398.916122 | 1817.548022 |
| 1574.119942 |          |             |             |             |
| WDFY1       | WDFY1    | 4784.427921 | 4995.907886 | 6350.267476 |
| 5225.489752 |          |             |             |             |
| LMBRD2      | LMBRD2   | 1286.472563 | 1116.266291 | 1060.42219  |
| 834.6268355 |          |             |             |             |
| COLQ        | COLQ     | 34.37538023 | 35.21344766 | 88.08975076 |
| 120.6334909 |          |             |             |             |
| RHPN2       | RHPN2    | 76.04250777 | 99.47798963 | 95.89517172 |
| 183.4021366 |          |             |             |             |
| MAGI1       | MAGI1    | 35.41705842 | 30.8117667  | 8.92048109  |
| 13.73064124 |          |             |             |             |
| GBA3        | GBA3     | 0           | 0.880336191 | 12.2656615  |
| 15.69216142 |          |             |             |             |
| MAP3K1      | MAP3K1   | 4888.59574  | 5672.006081 | 6287.824108 |
| 5411.834169 |          |             |             |             |
| SEC11A      | SEC11A   | 7734.460551 | 7201.150046 | 4705.553775 |
| 5027.376215 |          |             |             |             |
| RBM6        | RBM6     | 3855.250976 | 4297.801287 | 3739.911697 |
| 4681.167903 |          |             |             |             |
| ITGB3BP     | ITGB3BP  | 1627.101331 | 1838.141968 | 1332.496863 |
| 1461.332532 |          |             |             |             |
| CNST        | CNST     | 3432.329632 | 2829.400519 | 4290.751404 |
| 3548.390001 |          |             |             |             |
| SRA1        | SRA1     | 7675.084894 | 4230.0154   | 4669.871851 |
| 4037.789285 |          |             |             |             |
| RABGAP1L    | RABGAP1L |             | 3944.835301 | 3364.644924 |
| 3939.507461 |          | 3614.100927 |             |             |
| RPL14       | RPL14    | 6930.284989 | 8563.030134 | 9945.221355 |
| 9326.047683 |          |             |             |             |
| ART3        | ART3     | 60.41733494 | 63.38420578 | 30.10662368 |

|             |             |             |             |             |             |            |
|-------------|-------------|-------------|-------------|-------------|-------------|------------|
| 34.3266031  |             |             |             |             |             |            |
| TMEM132C    | TMEM132C    |             | 0           | 0.880336191 | 0           | 0          |
| ATL2        | ATL2        | 3895.876426 | 3557.43855  |             | 3335.144868 |            |
| 3373.814705 |             |             |             |             |             |            |
| MLLT10      | MLLT10      | 229.1692015 | 624.1583597 |             | 545.2644066 |            |
| 336.4007104 |             |             |             |             |             |            |
| TSEN2       | TSEN2       | 1022.927981 | 617.9960064 |             | 1601.226356 |            |
| 1143.566263 |             |             |             |             |             |            |
| PACSIN1     | PACSIN1     | 19.79188559 | 42.25613719 |             | 0           | 17.6536816 |
| TMEFF2      | TMEFF2      | 3.125034566 | 0           | 0           | 0           |            |
| TTC8        | TTC8        | 176.0436139 | 161.9818592 |             | 227.4722678 |            |
| 168.6907353 |             |             |             |             |             |            |
| AFTPH       | AFTPH       | 3359.412159 | 3240.517521 |             | 3075.335856 |            |
| 2709.840125 |             |             |             |             |             |            |
| MGST3       | MGST3       | 1023.969659 | 2138.336609 |             | 2077.357034 |            |
| 2349.901172 |             |             |             |             |             |            |
| MEOX1       | MEOX1       | 210.4189941 | 51.93983529 |             | 130.4620359 |            |
| 88.26840798 |             |             |             |             |             |            |
| TRIM68      | TRIM68      | 1265.638999 | 1007.104603 |             | 1945.779938 |            |
| 1260.276714 |             |             |             |             |             |            |
| PTPRO       | PTPRO       | 83.3342551  | 41.375801   |             | 541.9192262 |            |
| 122.5950111 |             |             |             |             |             |            |
| SLC39A3     | SLC39A3     | 2470.860664 | 2020.371559 |             | 2085.162455 |            |
| 1743.791438 |             |             |             |             |             |            |
| NOP9        | NOP9        | 1155.221111 | 2067.909714 |             | 1012.474604 |            |
| 1835.002126 |             |             |             |             |             |            |
| ZBTB7B      | ZBTB7B      | 730.2164103 | 1981.636767 |             | 527.4234445 |            |
| 847.3767166 |             |             |             |             |             |            |
| DBT         | DBT         | 1215.638446 | 1160.2831   |             | 1255.557713 |            |
| 1339.718281 |             |             |             |             |             |            |
| HSPA9       | HSPA9       | 38400.42475 | 25946.14857 |             | 38689.24155 |            |
| 36414.64133 |             |             |             |             |             |            |
| MY05B       | MY05B       | 17.70852921 | 12.32470668 |             | 6.690360818 |            |
| 30.40356275 |             |             |             |             |             |            |
| DAXX        | DAXX        | 153.1266937 | 146.1358078 |             | 98.12529199 |            |
| 154.960094  |             |             |             |             |             |            |
| MLST8       | MLST8       | 3380.245722 | 2371.6257   |             | 2310.404602 |            |
| 2395.016137 |             |             |             |             |             |            |
| MGAT5B      | MGAT5B      | 25.00027653 | 38.73479242 |             | 64.6734879  |            |
| 30.40356275 |             |             |             |             |             |            |
| CSAG3       | CSAG3       | 10.41678189 | 0.880336191 |             | 28.99156354 | 0          |
| CCDC42B     | CCDC42B     | 965.6356809 | 794.0632447 |             | 1080.493272 |            |
| 965.0679272 |             |             |             |             |             |            |
| ZFYVE19     | ZFYVE19     | 1764.602852 | 1223.667306 |             | 1388.24987  |            |
| 1479.966974 |             |             |             |             |             |            |
| TMPRSS13    | TMPRSS13    |             | 48.95887487 |             | 45.77748195 |            |
| 82.51445008 | 35.30736319 |             |             |             |             |            |
| INS-IGF2    | INS-IGF2    |             | 1.041678189 |             | 11.44437049 |            |
| 6.690360818 | 105.9220896 |             |             |             |             |            |
| DRP2        | DRP2        | 23.95859834 | 47.53815434 |             | 7.805420954 |            |

|             |          |             |             |             |             |
|-------------|----------|-------------|-------------|-------------|-------------|
| 22.55748204 |          |             |             |             |             |
| CENPL       | CENPL    | 2461.48556  | 2070.550722 | 1685.970926 |             |
| 1828.136805 |          |             |             |             |             |
| CX3CR1      | CX3CR1   | 854.1761147 | 242.9727888 | 130.4620359 |             |
| 49.03800443 |          |             |             |             |             |
| SLC25A21    | SLC25A21 | 0           | 0.880336191 | 7.805420954 |             |
| 0           |          |             |             |             |             |
| PDIA6       | PDIA6    | 30901.38347 | 26107.25009 | 19220.29157 |             |
| 24151.21718 |          |             |             |             |             |
| EMR3        | EMR3     | 0           | 0           | 0.980760089 |             |
| SPNS1       | SPNS1    | 3253.160983 | 1947.303655 | 2545.682291 |             |
| 1759.483599 |          |             |             |             |             |
| CEP63       | CEP63    | 857.3011493 | 1037.036034 | 1176.388444 |             |
| 1270.084315 |          |             |             |             |             |
| SNCA        | SNCA     | 90.62600242 | 235.9300993 | 34.56686422 |             |
| 74.53776674 |          |             |             |             |             |
| CDHR1       | CDHR1    | 5.208390943 | 0.880336191 | 0           | 3.923040355 |
| GUF1        | GUF1     | 3410.45439  | 2147.139971 | 2278.067858 |             |
| 2326.36293  |          |             |             |             |             |
| POLR1A      | POLR1A   | 1087.512029 | 2123.370894 | 1517.596845 |             |
| 1687.888113 |          |             |             |             |             |
| DLL3        | DLL3     | 90.62600242 | 88.03361914 | 102.5855325 |             |
| 69.6339663  |          |             |             |             |             |
| LGSN        | LGSN     | 0           | 0           | 10.78836098 |             |
| SETDB1      | SETDB1   | 1144.804329 | 1578.442791 | 1602.341416 |             |
| 1323.04536  |          |             |             |             |             |
| MAPRE1      | MAPRE1   | 14134.53134 | 13146.94068 | 10584.15081 |             |
| 11598.46881 |          |             |             |             |             |
| COA4        | COA4     | 3510.455496 | 3106.70642  | 2831.137686 |             |
| 3109.990241 |          |             |             |             |             |
| PCDHGA4     | PCDHGA4  | 6.250069132 | 4.401680957 | 54.63794668 |             |
| 15.69216142 |          |             |             |             |             |
| LSM5        | LSM5     | 5944.857423 | 6461.667645 | 5460.449487 |             |
| 5458.910654 |          |             |             |             |             |
| SCAND1      | SCAND1   | 2060.439457 | 2095.200136 | 1679.280565 |             |
| 1716.330155 |          |             |             |             |             |
| PSMC3IP     | PSMC3IP  | 2625.029036 | 1810.851546 | 2069.551613 |             |
| 1931.116615 |          |             |             |             |             |
| ANKMY1      | ANKMY1   | 310.4201002 | 294.0322879 | 480.5909187 |             |
| 536.4757685 |          |             |             |             |             |
| KLHL3       | KLHL3    | 44.79216211 | 101.238662  | 131.5770961 |             |
| 150.0562936 |          |             |             |             |             |
| ZNF227      | ZNF227   | 1490.641488 | 1394.452527 | 2167.676905 |             |
| 1362.275763 |          |             |             |             |             |
| LETM1       | LETM1    | 4968.80496  | 4501.158947 | 3968.499025 |             |
| 4096.63489  |          |             |             |             |             |
| LDOC1       | LDOC1    | 431.2547701 | 615.3549978 | 343.438522  |             |
| 491.3608044 |          |             |             |             |             |
| LPHN2       | LPHN2    | 0           | 19.36739621 | 0           | 0           |
| KIR2DS4     | KIR2DS4  | 0           | 1.760672383 | 0           | 0           |

|             |             |             |   |             |             |               |
|-------------|-------------|-------------|---|-------------|-------------|---------------|
| GPR83       | GPR83       | 0           | 0 | 0           | 4.903800443 |               |
| KIF4A       | KIF4A       | 3956.293761 |   | 3504.618378 |             | 1749.529354   |
| 2383.247015 |             |             |   |             |             |               |
| HNRNPC      | HNRNPC      | 75222.70704 |   | 50187.96627 |             | 59244.2601    |
| 58710.26043 |             |             |   |             |             |               |
| SULF1       | SULF1       | 0           | 0 | 1.115060136 |             | 0             |
| LAIR1       | LAIR1       | 4896.929165 |   | 2681.504039 |             | 1003.554123   |
| 952.3180461 |             |             |   |             |             |               |
| TICAM2      | TICAM2      | 389.5876426 |   | 313.3996842 |             | 283.2252746   |
| 258.9206634 |             |             |   |             |             |               |
| C5orf30     | C5orf30     | 2187.524196 |   | 2200.840479 |             | 831.8348617   |
| 990.5676896 |             |             |   |             |             |               |
| BPIFB1      | BPIFB1      | 0           | 0 | 0           | 0.980760089 |               |
| WDR63       | WDR63       | 14.58349464 |   | 12.32470668 |             | 23.41626286   |
| 12.74988115 |             |             |   |             |             |               |
| ZNF383      | ZNF383      | 313.5451348 |   | 275.5452279 |             | 730.3643893   |
| 506.0722058 |             |             |   |             |             |               |
| CLDN23      | CLDN23      | 4.166712755 |   | 1.760672383 |             | 0 15.69216142 |
| PXDNL       | PXDNL       | 4.166712755 |   | 2.641008574 |             | 0 0.980760089 |
| TMEM71      | TMEM71      | 1444.807648 |   | 1938.500294 |             | 1157.432421   |
| 1521.158898 |             |             |   |             |             |               |
| ZFAND2A     | ZFAND2A     | 1045.844901 |   | 1029.113008 |             | 1267.823375   |
| 1034.701894 |             |             |   |             |             |               |
| IFI27L1     | IFI27L1     | 540.6309799 |   | 1412.939587 |             | 266.4993726   |
| 713.9933446 |             |             |   |             |             |               |
| GNL3        | GNL3        | 12933.47639 |   | 8792.79788  |             | 13582.54752   |
| 14203.3676  |             |             |   |             |             |               |
| RNF168      | RNF168      | 1682.310275 |   | 2096.080472 |             | 2274.722678   |
| 1751.637518 |             |             |   |             |             |               |
| CCM2        | CCM2        | 8953.224032 |   | 7114.877099 |             | 4596.277882   |
| 4381.055316 |             |             |   |             |             |               |
| C7orf31     | C7orf31     | 109.3762098 |   | 160.2211868 |             | 269.844553    |
| 207.9211388 |             |             |   |             |             |               |
| SLC9B1      | SLC9B1      | 1957.313317 |   | 1508.896232 |             | 1321.346261   |
| 1256.353674 |             |             |   |             |             |               |
| FAM160A2    | FAM160A2    |             |   | 419.79631   |             | 750.9267713   |
| 970.1023186 | 646.3208984 |             |   |             |             |               |
| MID1IP1     | MID1IP1     | 1429.182475 |   | 2446.454276 |             | 2017.143787   |
| 1761.445119 |             |             |   |             |             |               |
| MAGED4      | MAGED4      | 0           | 0 | 0           | 2.942280266 |               |
| METAP1D     | METAP1D     | 189.5854303 |   | 127.6487478 |             | 163.91384     |
| 180.4598563 |             |             |   |             |             |               |
| RPL13       | RPL13       | 24098.18322 |   | 21700.28712 |             | 26722.41617   |
| 24830.88392 |             |             |   |             |             |               |
| LINC01119   | LINC01119   |             |   | 2.083356377 |             | 0 12.2656615  |
| 2.942280266 |             |             |   |             |             |               |
| KIAA0930    | KIAA0930    |             |   | 166.6685102 |             | 446.3304491   |
| 324.4824997 | 272.6513047 |             |   |             |             |               |
| PHF21A      | PHF21A      | 1283.347528 |   | 1638.305652 |             | 1393.82517    |
| 1407.390727 |             |             |   |             |             |               |

|             |             |             |             |             |             |
|-------------|-------------|-------------|-------------|-------------|-------------|
| TDRKH       | TDRKH       | 1913.562833 | 2194.678125 | 2109.693778 |             |
| 2496.034426 |             |             |             |             |             |
| BZRAP1-AS1  | BZRAP1-AS1  | 4361.506576 | 6021.499549 |             |             |
| 3504.634008 | 4875.358401 |             |             |             |             |
| MTA3        | MTA3        | 951.0521863 | 1322.26496  | 1030.315566 |             |
| 1146.508544 |             |             |             |             |             |
| STMN4       | STMN4       | 1.041678189 | 0           | 0           |             |
| SS18        | SS18        | 9575.105911 | 7492.541325 | 8774.408212 |             |
| 8741.51467  |             |             |             |             |             |
| CLEC12A     | CLEC12A     | 2.083356377 | 7.923025723 | 2.230120273 | 0           |
| MAGEE2      | MAGEE2      | 1.041678189 | 0           | 0           |             |
| HIST3H2BB   | HIST3H2BB   | 19.79188559 | 25.52974955 |             |             |
| 12.2656615  | 13.73064124 |             |             |             |             |
| HIST4H4     | HIST4H4     | 35.41705842 | 55.46118006 | 57.98312709 |             |
| 41.19192372 |             |             |             |             |             |
| ADSSL1      | ADSSL1      | 18.7502074  | 19.36739621 | 93.66505145 |             |
| 31.38432284 |             |             |             |             |             |
| SYS1        | SYS1        | 2045.855963 | 1479.845138 | 2633.772042 |             |
| 1660.42683  |             |             |             |             |             |
| PTCD2       | PTCD2       | 601.0483149 | 445.4501129 | 331.1728605 |             |
| 483.5147237 |             |             |             |             |             |
| SCN11A      | SCN11A      | 5.208390943 | 0.880336191 | 20.07108245 |             |
| 3.923040355 |             |             |             |             |             |
| FKRP        | FKRP        | 461.4634376 | 756.2087884 | 592.0969324 |             |
| 431.534439  |             |             |             |             |             |
| STRN4       | STRN4       | 4640.676331 | 4225.613719 | 3210.258132 |             |
| 3452.275512 |             |             |             |             |             |
| FAM76A      | FAM76A      | 351.0455496 | 513.2359996 | 634.4692175 |             |
| 501.1684053 |             |             |             |             |             |
| MIR4761     | MIR4761     | 1333.348082 | 734.2003837 | 839.6402826 |             |
| 938.5874049 |             |             |             |             |             |
| MIR4758     | MIR4758     | 0           | 0.880336191 | 0           |             |
| LINC00332   | LINC00332   | 2.083356377 | 0           | 0           | 12.2656615  |
| 3.923040355 |             |             |             |             |             |
| SNX22       | SNX22       | 24337.7692  | 16117.19499 | 15948.70513 |             |
| 13535.46998 |             |             |             |             |             |
| VPS51       | VPS51       | 4394.840278 | 3994.085301 | 3906.055657 |             |
| 4567.399733 |             |             |             |             |             |
| PSMA8       | PSMA8       | 77.08418596 | 84.51227438 | 123.7716751 |             |
| 118.6719707 |             |             |             |             |             |
| SPINK5      | SPINK5      | 5.208390943 | 0           | 0           | 0.980760089 |
| NQ01        | NQ01        | 4583.38403  | 2135.6956   | 1415.011313 |             |
| 1040.586454 |             |             |             |             |             |
| PHACTR4     | PHACTR4     | 1711.477264 | 2111.046187 | 1603.456476 |             |
| 1899.732292 |             |             |             |             |             |
| CSK         | CSK         | 5375.059454 | 8265.476501 | 3383.092453 |             |
| 4432.054841 |             |             |             |             |             |
| MY07A       | MY07A       | 29.16698928 | 43.13647338 | 57.98312709 |             |
| 69.6339663  |             |             |             |             |             |
| NTNG1       | NTNG1       | 0           | 0           | 0           | 3.923040355 |

|                       |                       |             |             |             |             |
|-----------------------|-----------------------|-------------|-------------|-------------|-------------|
| TMEM70                | TMEM70                | 4307.33931  | 3901.65     | 3887.099635 | 3808.291424 |
| C5orf49               | C5orf49               | 3.125034566 | 1.760672383 | 0           | 0           |
| CDC25B                | CDC25B                | 5470.893847 | 6656.221943 | 2803.261183 |             |
| 2480.342264           |                       |             |             |             |             |
| GNA15                 | GNA15                 | 3269.827834 | 5707.219529 | 966.7571381 |             |
| 2483.284545           |                       |             |             |             |             |
| FAM219B               | FAM219B               | 1610.43448  | 1841.663312 | 1617.952258 |             |
| 2294.978607           |                       |             |             |             |             |
| MIR1343               | MIR1343               | 1.041678189 | 0           | 0           | 0           |
| LOC100499489          | LOC100499489          |             | 47.91719668 | 43.13647338 |             |
| 201.8258847           | 129.4603317           |             |             |             |             |
| UBAC2-AS1             | UBAC2-AS1             |             | 108.3345316 | 117.9650497 |             |
| 256.4638313           | 149.0755335           |             |             |             |             |
| LOC100499484-C90RF174 | LOC100499484-C90RF174 |             |             | 105.2094971 |             |
| 65.14487817           | 133.8072164           |             | 141.2294528 |             |             |
| ZNF226                | ZNF226                | 467.7135067 | 713.0723151 | 962.2968976 |             |
| 999.3945304           |                       |             |             |             |             |
| G6PD                  | G6PD                  | 167.7101884 | 1117.146627 | 220.781907  |             |
| 207.9211388           |                       |             |             |             |             |
| ABI1                  | ABI1                  | 12922.01793 | 11152.97921 | 10289.77494 |             |
| 11010.01276           |                       |             |             |             |             |
| ZIC4                  | ZIC4                  | 0           | 0           | 0.980760089 |             |
| SMG7                  | SMG7                  | 5146.93193  | 5841.910966 | 4785.838105 |             |
| 5371.623006           |                       |             |             |             |             |
| OSBPL10               | OSBPL10               | 275.0030418 | 247.3744698 | 49.062646   |             |
| 75.51852683           |                       |             |             |             |             |
| CENPO                 | CENPO                 | 2837.531386 | 3597.934014 | 2165.446785 |             |
| 2236.133002           |                       |             |             |             |             |
| ADORA2A               | ADORA2A               | 2930.240745 | 3479.088629 | 2574.673855 |             |
| 4239.825863           |                       |             |             |             |             |
| ADH5                  | ADH5                  | 7863.628646 | 7174.73996  | 5567.49526  |             |
| 6382.786657           |                       |             |             |             |             |
| MTHFSD                | MTHFSD                | 886.4681386 | 839.8407266 | 916.579432  |             |
| 818.934674            |                       |             |             |             |             |
| RNF103                | RNF103                | 1225.01355  | 1214.863944 | 1270.053495 |             |
| 1250.469113           |                       |             |             |             |             |
| LTBP2                 | LTBP2                 | 8.33342551  | 9.683698106 | 26.76144327 |             |
| 10.78836098           |                       |             |             |             |             |
| CLEC3B                | CLEC3B                | 2.083356377 | 2.641008574 | 11.15060136 |             |
| 3.923040355           |                       |             |             |             |             |
| AURKC                 | AURKC                 | 25.00027653 | 11.44437049 | 43.48734531 |             |
| 11.76912106           |                       |             |             |             |             |
| GAB1                  | GAB1                  | 2.083356377 | 40.49546481 | 0           | 3.923040355 |
| ATP6V0E1              | ATP6V0E1              |             | 10139.69549 | 8409.851637 |             |
| 10585.26587           | 8571.843175           |             |             |             |             |
| KITLG                 | KITLG                 | 4.166712755 | 0.880336191 | 17.84096218 | 0           |
| ZNF202                | ZNF202                | 1183.346422 | 919.0709839 | 1254.442653 |             |
| 1317.160799           |                       |             |             |             |             |
| MYOT                  | MYOT                  | 39.58377117 | 33.45277527 | 22.30120273 |             |
| 31.38432284           |                       |             |             |             |             |



|              |              |             |             |             |             |
|--------------|--------------|-------------|-------------|-------------|-------------|
| TRAF5        | TRAF5        | 3508.37214  | 4410.484319 | 2116.384139 |             |
| 4169.211137  |              |             |             |             |             |
| RAPGEF6      | RAPGEF6      | 3688.582466 | 4764.379468 | 5976.72233  |             |
| 5964.002099  |              |             |             |             |             |
| MIR4435-1HG  | MIR4435-1HG  |             | 2810.447753 | 5518.827584 |             |
| 867.516786   | 1830.098325  |             |             |             |             |
| TTC26        | TTC26        | 910.4267369 | 740.362737  | 429.2981525 |             |
| 678.6859814  |              |             |             |             |             |
| FBLL1        | FBLL1        | 1.041678189 | 0.880336191 | 1.115060136 | 0           |
| LINC01135    | LINC01135    |             | 6.250069132 | 12.32470668 |             |
| 20.07108245  | 9.807600887  |             |             |             |             |
| PPP4R1L      | PPP4R1L      | 466.6718285 | 557.2528092 | 321.1373192 |             |
| 326.5931095  |              |             |             |             |             |
| PRRT4        | PRRT4        | 0           | 12.2656615  | 4.903800443 |             |
| SPTAN1       | SPTAN1       | 6267.777661 | 15730.7274  | 6490.765053 |             |
| 8940.608968  |              |             |             |             |             |
| C2orf74      | C2orf74      | 552.08944   | 542.2870939 | 681.3017433 |             |
| 630.628737   |              |             |             |             |             |
| CAMK2G       | CAMK2G       | 159.3767629 | 339.8097699 | 393.6162281 |             |
| 214.7864594  |              |             |             |             |             |
| CAMK2D       | CAMK2D       | 2228.149646 | 3582.087963 | 2993.936466 |             |
| 3578.793564  |              |             |             |             |             |
| MXD1         | MXD1         | 1692.727057 | 1999.243491 | 641.1595784 |             |
| 745.3776674  |              |             |             |             |             |
| M6PR         | M6PR         | 12914.72618 | 8716.208631 | 14394.3113  |             |
| 12113.36786  |              |             |             |             |             |
| EPCAM        | EPCAM        | 8.33342551  | 1.760672383 | 14.49578177 |             |
| 7.846080709  |              |             |             |             |             |
| TACSTD2      | TACSTD2      | 0           | 1.115060136 | 4.903800443 |             |
| SH2D1A       | SH2D1A       | 12187.63481 | 9173.103115 | 7692.79988  |             |
| 6242.537964  |              |             |             |             |             |
| LYN          | LYN          | 255.2111562 | 612.7139892 | 92.54999131 |             |
| 314.8239885  |              |             |             |             |             |
| GTF2B        | GTF2B        | 4584.425708 | 4026.65774  | 4911.8399   |             |
| 3961.289998  |              |             |             |             |             |
| CDK7         | CDK7         | 4640.676331 | 3056.527257 | 3016.237669 |             |
| 3168.835846  |              |             |             |             |             |
| CENPB        | CENPB        | 60.41733494 | 356.5361575 | 71.36384872 |             |
| 92.19144833  |              |             |             |             |             |
| TGM4         | TGM4         | 4.166712755 | 1.760672383 | 7.805420954 |             |
| 4.903800443  |              |             |             |             |             |
| GHITM        | GHITM        | 39658.772   | 26509.56373 | 34669.44976 |             |
| 29452.22546  |              |             |             |             |             |
| APOA2        | APOA2        | 3.125034566 | 0           | 0.980760089 |             |
| GPR64        | GPR64        | 2.083356377 | 2.641008574 | 0           | 1.961520177 |
| TRIM6-TRIM34 | TRIM6-TRIM34 |             | 841.6759765 | 719.2346684 |             |
| 871.9770266  | 843.4536763  |             |             |             |             |
| DDX11L2      | DDX11L2      | 144.7932682 | 44.89714576 | 90.31987104 |             |
| 31.38432284  |              |             |             |             |             |
| MCRS1        | MCRS1        | 5622.978863 | 4553.979118 | 4168.094789 |             |

|               |               |             |             |             |
|---------------|---------------|-------------|-------------|-------------|
| 4033.866245   |               |             |             |             |
| CDK5RAP1      | CDK5RAP1      |             | 3840.667482 | 2769.537658 |
| 3142.239464   | 3564.082162   |             |             |             |
| DNAJB14       | DNAJB14       | 2356.276063 | 2126.011902 | 2456.47748  |
| 2729.455327   |               |             |             |             |
| TXNRD2        | TXNRD2        | 1229.180263 | 1386.529502 | 983.4830402 |
| 1089.624459   |               |             |             |             |
| NPIPA8        | NPIPA8        | 1.041678189 | 0           | 4.460240545 |
|               |               |             |             | 1.961520177 |
| PLOD1         | PLOD1         | 1650.018251 | 1857.509364 | 1010.244483 |
| 1276.949635   |               |             |             |             |
| SYNJ2BP-COX16 | SYNJ2BP-COX16 |             | 3193.785327 | 3579.446954 |
| 2825.562385   | 2969.741548   |             |             |             |
| SNORD18B      | SNORD18B      |             | 6.250069132 | 4.401680957 |
| 5.575300681   | 2.942280266   |             |             |             |
| SNORD18A      | SNORD18A      |             | 16.66685102 | 0           |
|               |               |             |             | 6.690360818 |
|               | 7.846080709   |             |             |             |
| SNORD16       | SNORD16       | 56.25062219 | 30.8117667  | 52.4078264  |
| 44.13420399   |               |             |             |             |
| LILRP2        | LILRP2        | 0           | 0           | 5.884560532 |
| ZFAT-AS1      | ZFAT-AS1      |             | 28.12531109 | 36.97412004 |
| 33.45180409   | 48.05724434   |             |             |             |
| ARGFXP2       | ARGFXP2       | 0           | 21.12806859 | 2.230120273 |
|               |               |             |             | 16.67292151 |
| DPRXP4        | DPRXP4        | 0           | 5.282017149 | 0           |
|               |               |             |             | 2.942280266 |
| CYP4V2        | CYP4V2        | 1182.304744 | 1432.306983 | 904.3137705 |
| 1559.408541   |               |             |             |             |
| MEIS3P1       | MEIS3P1       | 0           | 0           | 0.980760089 |
| MRPL42P5      | MRPL42P5      |             | 114.5846008 | 121.4863944 |
| 74.70902913   | 130.4410918   |             |             |             |
| UBE3B         | UBE3B         | 3140.659739 | 3303.901726 | 2906.961775 |
| 3658.235131   |               |             |             |             |
| SPOCD1        | SPOCD1        | 0           | 0           | 26.76144327 |
| YAP1          | YAP1          | 7.291747321 | 0           | 25.64638313 |
|               |               |             |             | 5.884560532 |
| FTH1P3        | FTH1P3        | 9.375103698 | 17.60672383 | 6.690360818 |
| 10.78836098   |               |             |             |             |
| HCG26         | HCG26         | 3.125034566 | 11.44437049 | 11.15060136 |
| 12.74988115   |               |             |             |             |
| SUM01P1       | SUM01P1       | 6.250069132 | 0           | 1.115060136 |
|               |               |             |             | 0           |
| FAM83A        | FAM83A        | 1.041678189 | 0           | 0           |
|               |               |             |             | 0           |
| FAM98B        | FAM98B        | 204.168925  | 287.8699346 | 188.445163  |
| 158.8831344   |               |             |             |             |
| PIR           | PIR           | 739.591514  | 384.7069157 | 130.4620359 |
| 88.26840798   |               |             |             |             |
| ERI2          | ERI2          | 1213.55509  | 1327.546977 | 841.8704029 |
| 1081.778378   |               |             |             |             |
| MSM01         | MSM01         | 3740.666376 | 4080.358247 | 4084.465279 |
| 4678.225623   |               |             |             |             |
| RBP4          | RBP4          | 1.041678189 | 0           | 0           |
|               |               |             |             | 0           |
| CCDC3         | CCDC3         | 11.45846008 | 91.55496391 | 5.575300681 |
| 36.28812328   |               |             |             |             |
| ZMIZ2         | ZMIZ2         | 1040.636511 | 2779.221356 | 1738.378752 |

|              |              |             |             |             |
|--------------|--------------|-------------|-------------|-------------|
| 2154.729915  |              |             |             |             |
| WNT16        | WNT16        | 11.45846008 | 2.641008574 | 4.460240545 |
| 4.903800443  |              |             |             |             |
| EID2         | EID2         | 1041.678189 | 1135.633687 | 1134.016159 |
| 1057.259376  |              |             |             |             |
| TRIM56       | TRIM56       | 1577.100778 | 1635.664644 | 2103.003417 |
| 1579.023743  |              |             |             |             |
| DDAH1        | DDAH1        | 0           | 0.880336191 | 5.575300681 |
| 0            |              |             |             | 0           |
| CD200R1      | CD200R1      | 1018.761269 | 758.849797  | 1959.160659 |
| 1004.298331  |              |             |             |             |
| NEK5         | NEK5         | 0           | 2.641008574 | 0           |
| 0            |              |             |             | 0           |
| MARK2        | MARK2        | 3864.62608  | 3683.326625 | 3240.364756 |
| 2662.763641  |              |             |             |             |
| FBXL17       | FBXL17       | 185.4187176 | 322.2030461 | 351.2439429 |
| 392.3040355  |              |             |             |             |
| POMT1        | POMT1        | 3401.079286 | 2564.419326 | 1704.926948 |
| 2616.667917  |              |             |             |             |
| UCK1         | UCK1         | 1926.062971 | 1862.791381 | 1651.404062 |
| 1580.985263  |              |             |             |             |
| SUV39H2      | SUV39H2      | 2085.439734 | 1975.474414 | 1570.004672 |
| 1794.790962  |              |             |             |             |
| LGALS4       | LGALS4       | 4.166712755 | 10.5640343  | 15.61084191 |
| 9.807600887  |              |             |             |             |
| RNF170       | RNF170       | 1213.55509  | 1044.959059 | 1033.660746 |
| 1176.912106  |              |             |             |             |
| PHF8         | PHF8         | 2486.485836 | 3700.933349 | 3545.891233 |
| 3494.448196  |              |             |             |             |
| FBXL20       | FBXL20       | 539.5893017 | 926.9940096 | 963.4119577 |
| 909.1646022  |              |             |             |             |
| KLHL30       | KLHL30       | 0           | 0           | 0.980760089 |
| 0            |              |             |             |             |
| EYS          | EYS          | 2.083356377 | 4.401680957 | 8.92048109  |
| 0.980760089  |              |             |             |             |
| NHLRC1       | NHLRC1       | 2.083356377 | 7.923025723 | 5.575300681 |
| 39.23040355  |              |             |             |             |
| SLC24A1      | SLC24A1      | 67.70908227 | 205.9986688 | 177.2945617 |
| 220.67102    |              |             |             |             |
| TLX2         | TLX2         | 132.29313   | 102.1189982 | 50.17770613 |
| 22.55748204  |              |             |             |             |
| PCNT         | PCNT         | 3580.247935 | 4386.715242 | 2846.748528 |
| 2818.704495  |              |             |             |             |
| LOC100505812 | LOC100505812 |             | 694.7993519 | 1091.616877 |
| 671.266202   |              |             |             |             |
| 748.3199477  |              |             |             |             |
| HCG25        | HCG25        | 0           | 8.803361914 | 0           |
| 0            |              |             |             | 17.6536816  |
| NRARP        | NRARP        | 27.08363291 | 33.45277527 | 3.345180409 |
| 12.74988115  |              |             |             |             |
| FGFRL1       | FGFRL1       | 237.502627  | 300.1946413 | 391.3861078 |
| 473.7071228  |              |             |             |             |
| HGF          | HGF          | 0           | 9.683698106 | 0           |
| 0            |              |             |             | 0           |
| UMODL1       | UMODL1       | 2.083356377 | 10.5640343  | 3.345180409 |
| 4.903800443  |              |             |             |             |

|               |               |             |             |             |   |
|---------------|---------------|-------------|-------------|-------------|---|
| TMC5          | TMC5          | 1.041678189 | 2.641008574 | 2.230120273 | 0 |
| PAPD5         | PAPD5         | 997.9277048 | 1477.204129 | 1236.601691 |   |
| 1048.432535   |               |             |             |             |   |
| ZKSCAN1       | ZKSCAN1       | 4370.88168  | 4205.365986 | 5057.912778 |   |
| 4259.441065   |               |             |             |             |   |
| GALK2         | GALK2         | 2454.193813 | 1729.860616 | 1448.463117 |   |
| 1621.196427   |               |             |             |             |   |
| FAM86A        | FAM86A        | 2773.989017 | 1870.714407 | 2543.452171 |   |
| 2218.479321   |               |             |             |             |   |
| ZIM2          | ZIM2          | 0           | 0           | 1.961520177 |   |
| MFSD6         | MFSD6         | 5513.602653 | 5411.426569 | 4534.949574 |   |
| 4676.264103   |               |             |             |             |   |
| ROPN1L-AS1    | ROPN1L-AS1    |             | 2.083356377 | 7.042689532 |   |
| 4.460240545   | 1.961520177   |             |             |             |   |
| NR2F2-AS1     | NR2F2-AS1     |             | 1.041678189 | 0           | 0 |
| LINC01024     | LINC01024     |             | 90.62600242 | 37.85445623 | 0 |
| 171.719261    | 50.99952461   |             |             |             |   |
| LINC00568     | LINC00568     |             | 3.125034566 | 4.401680957 |   |
| 1.115060136   | 10.78836098   |             |             |             |   |
| HLTF-AS1      | HLTF-AS1      |             | 172.9185793 | 203.3576602 |   |
| 160.5686596   | 199.094298    |             |             |             |   |
| SNX17         | SNX17         | 13872.02844 | 10756.82792 | 10587.49599 |   |
| 11729.89066   |               |             |             |             |   |
| AN07          | AN07          | 7.291747321 | 4.401680957 | 14.49578177 |   |
| 50.99952461   |               |             |             |             |   |
| DHRS3         | DHRS3         | 1337.514794 | 757.0891246 | 2202.243769 |   |
| 1288.718757   |               |             |             |             |   |
| LOC100134868  | LOC100134868  |             | 45.8338403  | 46.65781815 |   |
| 63.55842777   | 27.46128248   |             |             |             |   |
| DHRS4L1       | DHRS4L1       | 96.87607155 | 60.74319721 | 71.36384872 |   |
| 75.51852683   |               |             |             |             |   |
| CCNT1         | CCNT1         | 710.4245247 | 1622.459601 | 822.9143806 |   |
| 1178.873627   |               |             |             |             |   |
| CKS1B         | CKS1B         | 6169.859912 | 6631.57253  | 5168.303732 |   |
| 5814.926566   |               |             |             |             |   |
| LINC01420     | LINC01420     |             | 1733.352506 | 1616.297247 |   |
| 2990.591285   | 2233.190722   |             |             |             |   |
| LOC389834     | LOC389834     |             | 236.4609488 | 316.9210289 |   |
| 172.8343211   | 339.3429907   |             |             |             |   |
| LINC00635     | LINC00635     |             | 0           | 1.760672383 | 0 |
| ZNF670-ZNF695 | ZNF670-ZNF695 |             | 54.16726581 | 73.06790389 | 0 |
| 65.78854804   | 47.07648426   |             |             |             |   |
| ARL17A        | ARL17A        | 325.0035949 | 296.6732965 | 331.1728605 |   |
| 336.4007104   |               |             |             |             |   |
| FAM195B       | FAM195B       | 1755.227748 | 1656.792712 | 1632.448039 |   |
| 1345.602842   |               |             |             |             |   |
| DHRS9         | DHRS9         | 6.250069132 | 63.38420578 | 22.30120273 |   |
| 150.0562936   |               |             |             |             |   |
| KIR3DS1       | KIR3DS1       | 0           | 65.78854804 | 0.980760089 |   |
| SQSTM1        | SQSTM1        | 20327.30817 | 14208.62613 | 44010.30852 |   |

|             |            |             |             |             |   |
|-------------|------------|-------------|-------------|-------------|---|
| 24358.15756 |            |             |             |             |   |
| FAM198A     | FAM198A    | 5.208390943 | 3.521344766 | 12.2656615  | 0 |
| ACPP        | ACPP       | 1.041678189 | 1.760672383 | 8.92048109  | 0 |
| RDM1        | RDM1       | 110.417888  | 245.6137974 | 20.07108245 |   |
| 170.6522554 |            |             |             |             |   |
| COL4A3BP    | COL4A3BP   |             | 2141.690356 | 2148.900643 |   |
| 2119.729319 |            | 1958.577897 |             |             |   |
| RGL1        | RGL1       | 707.2994901 | 707.7902979 | 608.8228344 |   |
| 412.8999973 |            |             |             |             |   |
| MTCH1       | MTCH1      | 8565.719746 | 8063.879514 | 6773.990328 |   |
| 7276.259098 |            |             |             |             |   |
| GPI         | GPI        | 36478.52849 | 31809.18761 | 22046.96901 |   |
| 32933.92378 |            |             |             |             |   |
| GP1BA       | GP1BA      | 5.208390943 | 14.08537906 | 4.460240545 |   |
| 2.942280266 |            |             |             |             |   |
| TRIM69      | TRIM69     | 521.8807725 | 242.0924526 | 478.3607985 |   |
| 423.6883583 |            |             |             |             |   |
| ZNRF3       | ZNRF3      | 9.375103698 | 8.803361914 | 49.062646   |   |
| 37.26888337 |            |             |             |             |   |
| ZNF30       | ZNF30      | 319.7952039 | 296.6732965 | 647.8499392 |   |
| 438.3997596 |            |             |             |             |   |
| HMG2P46     | HMG2P46    |             | 14.58349464 | 14.96571525 |   |
| 32.33674395 |            | 2.942280266 |             |             |   |
| CALHM2      | CALHM2     | 2841.698099 | 2076.713076 | 842.985463  |   |
| 1049.413295 |            |             |             |             |   |
| DMTF1       | DMTF1      | 3250.035949 | 3418.345431 | 4479.196567 |   |
| 3811.233705 |            |             |             |             |   |
| MPP2        | MPP2       | 42.70880574 | 93.31563629 | 326.7126199 |   |
| 210.8634191 |            |             |             |             |   |
| DNMBP-AS1   | DNMBP-AS1  |             | 27.08363291 | 47.53815434 |   |
| 47.94758586 |            | 45.11496408 |             |             |   |
| OSBP2       | OSBP2      | 365.6290442 | 1199.898229 | 188.445163  |   |
| 469.7840825 |            |             |             |             |   |
| ZFX         | ZFX        | 3459.413265 | 2357.540321 | 4473.621267 |   |
| 2211.614    |            |             |             |             |   |
| EXT2        | EXT2       | 4206.296526 | 3110.227764 | 3890.444815 |   |
| 3324.776701 |            |             |             |             |   |
| SYCP3       | SYCP3      | 157.2934065 | 301.0749775 | 126.0017954 |   |
| 343.266031  |            |             |             |             |   |
| CKLF-CMTM1  | CKLF-CMTM1 |             | 4642.759687 | 6687.914046 |   |
| 2745.278055 |            | 3979.92444  |             |             |   |
| RBBP6       | RBBP6      | 3297.953145 | 4201.844642 | 4474.736327 |   |
| 3748.465059 |            |             |             |             |   |
| SNORA62     | SNORA62    | 66.66740408 | 39.61512861 | 43.48734531 |   |
| 44.13420399 |            |             |             |             |   |
| KIZ         | KIZ        | 644.7987988 | 581.9022225 | 824.0294407 |   |
| 652.205459  |            |             |             |             |   |
| LAMA1       | LAMA1      | 0           | 0           | 1.961520177 |   |
| GNB5        | GNB5       | 1798.978232 | 1837.261632 | 2024.949207 |   |
| 2125.307112 |            |             |             |             |   |

|             |             |             |             |             |             |
|-------------|-------------|-------------|-------------|-------------|-------------|
| MTUS2       | MTUS2       | 1.041678189 | 2.641008574 | 7.805420954 |             |
| 3.923040355 |             |             |             |             |             |
| DLGAP1      | DLGAP1      | 12.50013826 | 1.760672383 | 22.30120273 |             |
| 1.961520177 |             |             |             |             |             |
| WNT7A       | WNT7A       | 0           | 36.7969845  | 41.19192372 |             |
| TTC4        | TTC4        | 4118.795558 | 2639.247902 | 3921.666499 |             |
| 3566.043682 |             |             |             |             |             |
| TAF7        | TAF7        | 4991.72188  | 5391.178836 | 8148.859476 |             |
| 6845.705419 |             |             |             |             |             |
| GADD45G     | GADD45G     | 1037.511476 | 509.7146548 | 473.9005579 |             |
| 335.4199503 |             |             |             |             |             |
| JTB         | JTB         | 14036.61359 | 10249.75428 | 11996.93201 |             |
| 10806.01466 |             |             |             |             |             |
| EIF2D       | EIF2D       | 4194.838066 | 3215.868107 | 2688.409989 |             |
| 3425.79499  |             |             |             |             |             |
| RAB1A       | RAB1A       | 9500.105081 | 6483.67605  | 7254.581247 |             |
| 6472.035825 |             |             |             |             |             |
| C1orf61     | C1orf61     | 15.62517283 | 9.683698106 | 26.76144327 |             |
| 23.53824213 |             |             |             |             |             |
| NUP62CL     | NUP62CL     | 73.9591514  | 76.58924866 | 110.3909535 |             |
| 70.61472638 |             |             |             |             |             |
| TMEM108     | TMEM108     | 11.45846008 | 3.521344766 | 0           | 0           |
| MTMR8       | MTMR8       | 267.7112945 | 287.8699346 | 454.9445356 |             |
| 345.2275512 |             |             |             |             |             |
| CUEDC2      | CUEDC2      | 4413.590486 | 3521.344766 | 3118.823201 |             |
| 3844.579548 |             |             |             |             |             |
| C1orf116    | C1orf116    |             | 0           | 3.521344766 | 13.38072164 |
|             | 10.78836098 |             |             |             |             |
| DDRGK1      | DDRGK1      | 2997.949827 | 2171.789384 | 2334.935925 |             |
| 1885.02089  |             |             |             |             |             |
| C7orf49     | C7orf49     | 2867.740053 | 2405.078475 | 2619.27626  |             |
| 2776.531811 |             |             |             |             |             |
| DLK2        | DLK2        | 67.70908227 | 83.63193819 | 121.5415549 |             |
| 132.402612  |             |             |             |             |             |
| C17orf53    | C17orf53    |             | 1438.557579 | 1454.315388 |             |
| 933.3053341 | 1196.527308 |             |             |             |             |
| CDHR2       | CDHR2       | 4.166712755 | 6.16235334  | 10.03554123 |             |
| 13.73064124 |             |             |             |             |             |
| YIPF2       | YIPF2       | 554.1727964 | 601.2696188 | 670.1511419 |             |
| 531.5719681 |             |             |             |             |             |
| TRPM6       | TRPM6       | 8.33342551  | 14.96571525 | 0           | 0           |
| BMS1P5      | BMS1P5      | 5.208390943 | 4.401680957 | 44.60240545 |             |
| 31.38432284 |             |             |             |             |             |
| SNORD71     | SNORD71     | 1.041678189 | 1.760672383 | 2.230120273 | 0           |
| SNORA20     | SNORA20     | 13.54181645 | 18.48706002 | 25.64638313 |             |
| 30.40356275 |             |             |             |             |             |
| SNORD70     | SNORD70     | 15.62517283 | 13.20504287 | 24.531323   |             |
| 5.884560532 |             |             |             |             |             |
| SNORD69     | SNORD69     | 31.25034566 | 7.923025723 | 21.18614259 |             |
| 9.807600887 |             |             |             |             |             |

|                 |               |               |             |   |
|-----------------|---------------|---------------|-------------|---|
| SLC22A17        | SLC22A17      | 14.58349464   | 73.06790389 |   |
| 120.4264947     | 215.7672195   |               |             |   |
| MRGBP MRGBP     | 1481.266384   | 1361.880088   | 1430.622155 |   |
| 1297.545597     |               |               |             |   |
| ATP8B2 ATP8B2   | 2147.940425   | 3849.710165   | 2155.411243 |   |
| 2400.900697     |               |               |             |   |
| HPSE2 HPSE2     | 0 0.880336191 | 0             | 0           |   |
| NCALD NCALD     | 3203.16043    | 4580.389204   | 1083.838452 |   |
| 2252.805924     |               |               |             |   |
| UBE4B UBE4B     | 1348.973254   | 2164.746695   | 1175.273384 |   |
| 1241.642272     |               |               |             |   |
| UBAP1 UBAP1     | 4152.12926    | 4427.210707   | 3966.268905 |   |
| 3821.041305     |               |               |             |   |
| ENTPD1 ENTPD1   | 8475.093743   | 5135.001005   | 2880.200332 |   |
| 2159.633715     |               |               |             |   |
| JSRP1 JSRP1     | 2.083356377   | 3.521344766   | 8.92048109  |   |
| 16.67292151     |               |               |             |   |
| ATP6V0B ATP6V0B | 12278.26081   | 9809.586181   | 8836.85158  |   |
| 7378.258147     |               |               |             |   |
| RTN4RL2 RTN4RL2 | 3.125034566   | 7.923025723   | 11.15060136 |   |
| 2.942280266     |               |               |             |   |
| RTN4RL1 RTN4RL1 | 16.66685102   | 21.12806859   | 90.31987104 |   |
| 71.59548647     |               |               |             |   |
| ZDHHC21 ZDHHC21 | 878.1347131   | 890.0198895   | 467.2101971 |   |
| 579.6292124     |               |               |             |   |
| NRBP2 NRBP2     | 67.70908227   | 156.6998421   | 95.89517172 |   |
| 285.4011858     |               |               |             |   |
| PRMT3 PRMT3     | 3888.584678   | 2875.178001   | 3642.901465 |   |
| 3454.237032     |               |               |             |   |
| CLPS CLPS       | 0 0           | 3.345180409   | 0           |   |
| ZNF182 ZNF182   | 604.1733494   | 722.7560132   | 858.5963049 |   |
| 971.9332479     |               |               |             |   |
| LOC286190       | LOC286190     | 455.2133685   | 373.2625452 |   |
| 527.4234445     | 568.8408514   |               |             |   |
| SPATA42 SPATA42 | 0 0.880336191 | 0             | 0.980760089 |   |
| LOC100287792    | LOC100287792  | 0 0.880336191 | 0           | 0 |
| PSORS1C1        | PSORS1C1      | 0 0           | 1.115060136 |   |
| 0.980760089     |               |               |             |   |
| C1QTNF1 C1QTNF1 | 0 10.5640343  | 0             | 8.826840798 |   |
| C11orf74        | C11orf74      | 25.00027653   | 58.98252483 |   |
| 65.78854804     | 100.037529    |               |             |   |
| TP53 TP53       | 3053.158771   | 4870.900147   | 3665.202668 |   |
| 3930.886435     |               |               |             |   |
| TPD52 TPD52     | 2781.280764   | 2638.367566   | 1983.691982 |   |
| 2908.934423     |               |               |             |   |
| C14orf2 C14orf2 | 8360.509142   | 8409.851637   | 8022.85768  |   |
| 6965.35815      |               |               |             |   |
| PGPEP1L PGPEP1L | 1.041678189   | 0 0           | 0           |   |
| XRCC5 XRCC5     | 56445.41601   | 44343.4143    | 43770.57059 |   |
| 48584.89327     |               |               |             |   |

|               |               |             |               |               |
|---------------|---------------|-------------|---------------|---------------|
| CA14          | CA14          | 2.083356377 | 18.48706002   | 40.14216491   |
| 14.71140133   |               |             |               |               |
| COLGALT2      | COLGALT2      |             | 72.91747321   | 127.6487478   |
| 4.460240545   | 48.05724434   |             |               |               |
| SYNP02        | SYNP02        | 33.33370204 | 47.53815434   | 79.16926967   |
| 63.74940576   |               |             |               |               |
| SETD4         | SETD4         | 841.6759765 | 622.3976873   | 932.1902739   |
| 878.7610394   |               |             |               |               |
| ZCCHC17       | ZCCHC17       | 2601.070437 | 2269.506702   | 2391.803992   |
| 2168.460556   |               |             |               |               |
| PQLC3         | PQLC3         | 1904.187729 | 2318.805528   | 2321.555204   |
| 2808.896894   |               |             |               |               |
| AHSA2         | AHSA2         | 396.8793899 | 1103.941584   | 402.5367092   |
| 800.3002324   |               |             |               |               |
| CCDC86        | CCDC86        | 5149.015287 | 2567.94067    | 3929.47192    |
| 3530.736319   |               |             |               |               |
| TAF1A         | TAF1A         | 828.13416   | 617.1156702   | 836.2951022   |
| 879.7417995   |               |             |               |               |
| TRAPPC6A      | TRAPPC6A      |             | 1200.013273   | 648.8077731   |
| 1101.679415   | 1136.700943   |             |               |               |
| PTGES3        | PTGES3        | 26684.67016 | 19966.02482   | 26436.96077   |
| 23089.05401   |               |             |               |               |
| LDLR          | LDLR          | 3602.123177 | 5773.244743   | 3942.852642   |
| 5490.294976   |               |             |               |               |
| SLC02B1       | SLC02B1       | 10.41678189 | 3.521344766   | 0 19.61520177 |
| STON1         | STON1         | 101.0427843 | 124.127403    | 44.60240545   |
| 57.86484523   |               |             |               |               |
| STON1-GTF2A1L | STON1-GTF2A1L |             | 51.04223125   | 71.30723151   |
| 23.41626286   | 34.3266031    |             |               |               |
| FAT2          | FAT2          | 2.083356377 | 10.5640343    | 15.61084191   |
| 24.51900222   |               |             |               |               |
| TRAF1         | TRAF1         | 16976.22944 | 11704.06967   | 19106.55543   |
| 20841.15188   |               |             |               |               |
| HERC6         | HERC6         | 5296.93359  | 2229.891573   | 10435.84782   |
| 4046.616126   |               |             |               |               |
| GSTZ1         | GSTZ1         | 635.4236951 | 615.3549978   | 508.4674221   |
| 572.7638918   |               |             |               |               |
| CHD9          | CHD9          | 834.3842291 | 1006.224267   | 1410.551072   |
| 1023.913533   |               |             |               |               |
| ABCC11        | ABCC11        | 1.041678189 | 0 0           | 9.807600887   |
| KDEL2         | KDEL2         | 9651.148418 | 7439.721154   | 8491.182938   |
| 6934.954587   |               |             |               |               |
| PDE11A        | PDE11A        | 0 0         | 0 0.980760089 |               |
| SERPINE3      | SERPINE3      |             | 2.083356377   | 6.16235334    |
| 13.38072164   | 4.903800443   |             |               |               |
| SMIM13        | SMIM13        | 776.0502506 | 909.3872858   | 681.3017433   |
| 657.1092594   |               |             |               |               |
| ZBTB10        | ZBTB10        | 28.12531109 | 49.29882672   | 598.7872932   |
| 502.1491654   |               |             |               |               |
| CMTM1         | CMTM1         | 105.2094971 | 142.614463    | 36.7969845    |



|              |              |             |             |             |             |
|--------------|--------------|-------------|-------------|-------------|-------------|
| 84.34536763  |              |             |             |             |             |
| XKR7         | XKR7         | 0           | 0           | 1.115060136 | 0           |
| HAUS8        | HAUS8        | 2345.859281 |             | 2028.294585 | 1516.481785 |
| 1641.792388  |              |             |             |             |             |
| TLE3         | TLE3         | 1440.640935 |             | 2699.991099 | 1875.531149 |
| 2313.613049  |              |             |             |             |             |
| SUPT5H       | SUPT5H       | 9754.274559 |             | 11567.61756 | 10355.56349 |
| 10178.3282   |              |             |             |             |             |
| C4BPB        | C4BPB        | 172.9185793 |             | 110.0420239 | 61.32830749 |
| 34.3266031   |              |             |             |             |             |
| CANX         | CANX         | 47340.10696 |             | 39050.83312 | 41392.14732 |
| 35390.7278   |              |             |             |             |             |
| NOS1AP       | NOS1AP       | 1.041678189 | 0           | 0           | 0           |
| MYSM1        | MYSM1        | 788.5503888 |             | 1214.863944 | 1016.934844 |
| 1090.605219  |              |             |             |             |             |
| RPL36AL      | RPL36AL      | 13252.22992 |             | 13583.58743 | 13046.20359 |
| 11446.45099  |              |             |             |             |             |
| TGFBI        | TGFBI        | 0           | 6.16235334  | 17.84096218 | 20.59596186 |
| ZNF711       | ZNF711       | 8.33342551  |             | 179.5885831 | 7.805420954 |
| 84.34536763  |              |             |             |             |             |
| XPNPEP3      | XPNPEP3      | 769.8001814 |             | 743.8840818 | 1369.293847 |
| 1005.279091  |              |             |             |             |             |
| DKC1         | DKC1         | 11968.88239 |             | 7528.635109 | 10042.23159 |
| 10012.57975  |              |             |             |             |             |
| KCNAB3       | KCNAB3       | 32.29202385 |             | 52.82017149 | 70.24878858 |
| 50.99952461  |              |             |             |             |             |
| AIFM1        | AIFM1        | 6567.78098  |             | 4686.029547 | 3815.735786 |
| 4488.938926  |              |             |             |             |             |
| ATG12        | ATG12        | 2370.859557 |             | 2116.328204 | 3026.27321  |
| 2343.035852  |              |             |             |             |             |
| LOC100379224 | LOC100379224 |             |             | 780.2169633 | 701.6279446 |
| 1359.258306  | 1021.952012  |             |             |             |             |
| CTBP1-AS2    | CTBP1-AS2    |             |             | 496.880496  | 825.7553476 |
| 1117.290257  | 1458.390252  |             |             |             |             |
| HNRNPL       | HNRNPL       | 3622.95674  |             | 10174.04536 | 4392.221877 |
| 4356.536314  |              |             |             |             |             |
| C14orf142    | C14orf142    |             |             | 1565.642318 | 1805.569529 |
| 1254.442653  | 1439.75581   |             |             |             |             |
| NKIRAS1      | NKIRAS1      | 422.9213446 |             | 279.0665727 | 912.1191915 |
| 414.8615175  |              |             |             |             |             |
| CLEC16A      | CLEC16A      | 3183.368545 |             | 3446.516189 | 3084.256337 |
| 3116.855562  |              |             |             |             |             |
| PRUNE2       | PRUNE2       | 37.50041479 |             | 97.71731725 | 28.99156354 |
| 32.36508293  |              |             |             |             |             |
| CLDN19       | CLDN19       | 0           | 2.641008574 | 0           | 0           |
| RAB3GAP1     | RAB3GAP1     |             |             | 2123.981827 | 1946.423319 |
| 2662.763605  | 1974.270058  |             |             |             |             |
| TMEM129      | TMEM129      | 1823.978508 |             | 1397.093536 | 1775.175737 |
| 2092.942029  |              |             |             |             |             |
| SIRPB1       | SIRPB1       | 53.12558762 |             | 43.13647338 | 12.2656615  |

|             |             |             |             |             |             |   |
|-------------|-------------|-------------|-------------|-------------|-------------|---|
| 71.59548647 |             |             |             |             |             |   |
| PODXL2      | PODXL2      | 106.2511752 | 143.4947992 | 227.4722678 |             |   |
| 278.5358652 |             |             |             |             |             |   |
| FKBP5       | FKBP5       | 10353.23952 | 12454.1161  | 13607.07884 |             |   |
| 19503.39512 |             |             |             |             |             |   |
| PIP4K2C     | PIP4K2C     | 3729.207916 | 2572.342351 | 3979.649626 |             |   |
| 3400.295227 |             |             |             |             |             |   |
| CLEC18A     | CLEC18A     | 0           | 2.230120273 | 0           |             |   |
| CSMD2       | CSMD2       | 0           | 2.230120273 | 4.903800443 |             |   |
| SCARNA20    | SCARNA20    | 0           | 0.880336191 | 0           |             | 0 |
| SCARNA3     | SCARNA3     | 1.041678189 | 6.16235334  | 3.345180409 |             |   |
| 4.903800443 |             |             |             |             |             |   |
| LINC01184   | LINC01184   |             | 347.920515  | 328.3653994 |             |   |
| 341.2084017 | 348.1698315 |             |             |             |             |   |
| SNORA80A    | SNORA80A    |             | 2.083356377 | 2.641008574 |             |   |
| 2.230120273 | 6.865320621 |             |             |             |             |   |
| RREB1       | RREB1       | 190.6271085 | 645.2864283 | 376.8903261 |             |   |
| 268.7282643 |             |             |             |             |             |   |
| SAP130      | SAP130      | 3070.8673   | 2883.101027 | 2417.450375 |             |   |
| 2016.442742 |             |             |             |             |             |   |
| DNAH3       | DNAH3       | 7.291747321 | 1.760672383 | 31.22168382 |             |   |
| 12.74988115 |             |             |             |             |             |   |
| SLA2        | SLA2        | 1580.225812 | 3088.21936  | 921.0396726 |             |   |
| 1118.066501 |             |             |             |             |             |   |
| ELMOD3      | ELMOD3      | 1185.429779 | 1015.027629 | 1233.256511 |             |   |
| 1101.39358  |             |             |             |             |             |   |
| ANTXR1      | ANTXR1      | 0           | 0.880336191 | 24.531323   | 0.980760089 |   |
| LAPTM4A     | LAPTM4A     | 3822.958953 | 3229.07315  | 5208.445896 |             |   |
| 4016.212563 |             |             |             |             |             |   |
| ERV3-1      | ERV3-1      | 213.5440287 | 269.3828746 | 165.0289002 |             |   |
| 246.1707823 |             |             |             |             |             |   |
| TVP23A      | TVP23A      | 832.3008728 | 621.5173512 | 601.0174134 |             |   |
| 592.3790936 |             |             |             |             |             |   |
| CD200R1L    | CD200R1L    |             | 1.041678189 | 0           | 0           | 0 |
| TPM4        | TPM4        | 46708.84998 | 50617.57034 | 17600.10919 |             |   |
| 29512.05183 |             |             |             |             |             |   |
| SLC27A2     | SLC27A2     | 5277.141704 | 8569.192487 | 1643.598641 |             |   |
| 4701.763865 |             |             |             |             |             |   |
| DHX40       | DHX40       | 1427.099119 | 1566.118085 | 1584.500454 |             |   |
| 1643.753909 |             |             |             |             |             |   |
| EXOC7       | EXOC7       | 4725.052264 | 5647.356668 | 5369.014556 |             |   |
| 5525.60234  |             |             |             |             |             |   |
| TOP1        | TOP1        | 3365.662228 | 4649.055427 | 3946.197822 |             |   |
| 3611.158646 |             |             |             |             |             |   |
| GLIS3       | GLIS3       | 8.33342551  | 32.57243908 | 20.07108245 |             |   |
| 16.67292151 |             |             |             |             |             |   |
| BBS12       | BBS12       | 316.6701694 | 286.1092622 | 369.0849051 |             |   |
| 314.8239885 |             |             |             |             |             |   |
| PARP15      | PARP15      | 466.6718285 | 360.0575023 | 365.7397247 |             |   |
| 464.880282  |             |             |             |             |             |   |

|             |             |             |             |             |
|-------------|-------------|-------------|-------------|-------------|
| TMEM44      | TMEM44      | 145.8349464 | 247.3744698 | 76.9391494  |
| 137.3064124 |             |             |             |             |
| SNRPF       | SNRPF       | 6128.192784 | 7449.404852 | 5416.962142 |
| 6017.943904 |             |             |             |             |
| MARS        | MARS        | 27176.34226 | 19462.47252 | 29636.0683  |
| 23320.51339 |             |             |             |             |
| RPS14       | RPS14       | 24216.93453 | 24453.09839 | 33265.58905 |
| 28238.04447 |             |             |             |             |
| DBNL        | DBNL        | 19876.26152 | 12631.06367 | 10694.54177 |
| 12773.41939 |             |             |             |             |
| SUGT1       | SUGT1       | 2990.65808  | 2582.906386 | 2708.481071 |
| 2420.515899 |             |             |             |             |
| KNOP1       | KNOP1       | 1037.511476 | 910.2676219 | 900.9685901 |
| 918.9722031 |             |             |             |             |
| COA6        | COA6        | 2535.444711 | 2542.410921 | 2290.33352  |
| 2013.500462 |             |             |             |             |
| C16orf86    | C16orf86    |             | 58.33397857 | 69.54655912 |
| 39.02710477 | 114.7489304 |             |             |             |
| COG8        | COG8        | 3372.953975 | 2817.956149 | 3157.850306 |
| 3390.487627 |             |             |             |             |
| PPP1R42     | PPP1R42     | 0           | 1.115060136 | 0           |
| WIPI2       | WIPI2       | 3446.913126 | 4414.886    | 4675.447151 |
| 4928.319446 |             |             |             |             |
| GIGYF2      | GIGYF2      | 3691.707501 | 4069.794213 | 3687.503871 |
| 3735.715178 |             |             |             |             |
| METTL21A    | METTL21A    |             | 955.218899  | 1058.164102 |
| 1082.723392 | 1218.10403  |             |             |             |
| BSPRY       | BSPRY       | 364.587366  | 695.4655912 | 110.3909535 |
| 597.282894  |             |             |             |             |
| PNCK        | PNCK        | 0           | 0           | 0.980760089 |
| OR10G2      | OR10G2      | 0           | 5.282017149 | 0           |
| HIST2H3A    | HIST2H3A    |             | 1.041678189 | 0           |
| 0           |             |             |             | 1.115060136 |
| CCDC73      | CCDC73      | 2186.482518 | 1611.01523  | 2038.329929 |
| 1819.309964 |             |             |             |             |
| VCPKMT      | VCPKMT      | 676.0491445 | 654.9701264 | 1072.687851 |
| 853.2612771 |             |             |             |             |
| MY07B       | MY07B       | 17.70852921 | 32.57243908 | 7.805420954 |
| 13.73064124 |             |             |             |             |
| ZNF331      | ZNF331      | 736.4664794 | 725.3970217 | 1941.319697 |
| 1232.815431 |             |             |             |             |
| EVPLL       | EVPLL       | 1.041678189 | 0.880336191 | 5.575300681 |
| 2.942280266 |             |             |             |             |
| SSX2IP      | SSX2IP      | 1102.095524 | 1362.760424 | 1229.91133  |
| 1126.893342 |             |             |             |             |
| PTCH2       | PTCH2       | 21.87524196 | 77.46958485 | 16.72590204 |
| 35.30736319 |             |             |             |             |
| KCNJ11      | KCNJ11      | 0           | 5.575300681 | 0.980760089 |
| ATP6V1G2    | ATP6V1G2    |             | 0           | 0           |
| SDAD1       | SDAD1       | 5004.222019 | 4442.176422 | 5236.3224   |

|             |            |             |             |             |
|-------------|------------|-------------|-------------|-------------|
| 4694.898544 |            |             |             |             |
| RNASEH1     | RNASEH1    | 4461.507682 | 3597.053678 | 3216.948493 |
| 3127.643923 |            |             |             |             |
| FCH01       | FCH01      | 2219.81622  | 2816.195476 | 1873.301029 |
| 2516.630388 |            |             |             |             |
| FAM221B     | FAM221B    | 0           | 0.880336191 | 0           |
| 0.980760089 |            |             |             |             |
| PAICS       | PAICS      | 22039.82712 | 18265.2153  | 18773.15245 |
| 23594.14545 |            |             |             |             |
| FBP1        | FBP1       | 0           | 2.641008574 | 120.4264947 |
| 73.55700665 |            |             |             |             |
| GALE        | GALE       | 2819.822857 | 2264.224684 | 2348.316647 |
| 3382.641546 |            |             |             |             |
| ALDOA       | ALDOA      | 104253.2365 | 75095.31814 | 80429.28763 |
| 109613.6706 |            |             |             |             |
| PLSCR2      | PLSCR2     | 0           | 1.760672383 | 17.84096218 |
| 7.846080709 |            |             |             |             |
| GAS2        | GAS2       | 37.50041479 | 62.50386959 | 22.30120273 |
| 6.865320621 |            |             |             |             |
| CERS1       | CERS1      | 0           | 0.880336191 | 1.115060136 |
| 3.923040355 |            |             |             |             |
| LSMEM1      | LSMEM1     | 9.375103698 | 3.521344766 | 76.9391494  |
| 16.67292151 |            |             |             |             |
| IQCH        | IQCH       | 78.12586415 | 62.50386959 | 76.9391494  |
| 108.8643698 |            |             |             |             |
| TLE4        | TLE4       | 1348.973254 | 975.4125001 | 1922.363675 |
| 1355.410443 |            |             |             |             |
| MON1B       | MON1B      | 6206.318648 | 5888.568785 | 4992.12423  |
| 5385.353647 |            |             |             |             |
| CTAGE1      | CTAGE1     | 1.041678189 | 0           | 0           |
| 0.980760089 |            |             |             |             |
| TFB1M       | TFB1M      | 1296.889345 | 1292.333529 | 1137.361339 |
| 1693.772673 |            |             |             |             |
| SLC38A5     | SLC38A5    | 4545.883615 | 3201.782728 | 3739.911697 |
| 3323.79594  |            |             |             |             |
| C19orf35    | C19orf35   |             | 122.9180263 | 100.3583258 |
| 30.10662368 | 17.6536816 |             |             |             |
| PRR14L      | PRR14L     | 2565.653379 | 3178.893987 | 2964.944902 |
| 2590.187394 |            |             |             |             |
| UNC5CL      | UNC5CL     | 73.9591514  | 45.77748195 | 80.28432981 |
| 89.24916807 |            |             |             |             |
| RFX6        | RFX6       | 0           | 1.760672383 | 0           |
| 1.961520177 |            |             |             |             |
| MIR4530     | MIR4530    | 1.041678189 | 0.880336191 | 0           |
| 0.980760089 |            |             |             |             |
| MIR4526     | MIR4526    | 0           | 0.880336191 | 0           |
| 0           |            |             |             |             |
| SC5D        | SC5D       | 1009.386165 | 1022.070318 | 2085.162455 |
| 1395.621606 |            |             |             |             |
| TGFBR2      | TGFBR2     | 5595.89523  | 6769.785312 | 11673.56457 |
| 13151.01203 |            |             |             |             |
| FUT6        | FUT6       | 0           | 0.880336191 | 0           |
| 0           |            |             |             |             |
| VASN        | VASN       | 19.79188559 | 44.01680957 | 65.78854804 |
| 25.49976231 |            |             |             |             |
| TMEM139     | TMEM139    | 64.5840477  | 50.17916291 | 148.3029981 |
| 91.21068825 |            |             |             |             |
| TSPYL6      | TSPYL6     | 0           | 0.880336191 | 0           |
| 0           |            |             |             |             |
| KDM5C       | KDM5C      | 2593.77869  | 4539.893739 | 3734.336396 |

|             |             |             |             |             |             |
|-------------|-------------|-------------|-------------|-------------|-------------|
| 2549.976231 |             |             |             |             |             |
| LAMTOR5     | LAMTOR5     | 8460.510249 | 8297.168604 | 7885.705284 |             |
| 8013.790685 |             |             |             |             |             |
| KLF4        | KLF4        | 2.083356377 | 1.760672383 | 2.230120273 | 0           |
| ANP32B      | ANP32B      | 8626.137081 | 9714.509873 | 7269.077028 |             |
| 7137.971925 |             |             |             |             |             |
| LAT         | LAT         | 17563.73594 | 12046.52044 | 8914.905789 |             |
| 11407.22059 |             |             |             |             |             |
| IPCEF1      | IPCEF1      | 1766.686208 | 1495.691189 | 5030.036275 |             |
| 2945.222546 |             |             |             |             |             |
| DLG4        | DLG4        | 626.0485914 | 557.2528092 | 363.5096044 |             |
| 534.5142483 |             |             |             |             |             |
| COP57A      | COP57A      | 3623.998418 | 2725.520849 | 3323.994266 |             |
| 4034.847005 |             |             |             |             |             |
| CKAP2       | CKAP2       | 7527.166592 | 5836.628949 | 3931.70204  |             |
| 4962.646049 |             |             |             |             |             |
| TMCC1       | TMCC1       | 194.7938213 | 280.8272451 | 229.7023881 |             |
| 203.9980984 |             |             |             |             |             |
| MXD4        | MXD4        | 1645.851538 | 1253.598737 | 1135.131219 |             |
| 1216.14251  |             |             |             |             |             |
| CHD1L       | CHD1L       | 4668.801642 | 4347.100113 | 2893.581054 |             |
| 4068.192848 |             |             |             |             |             |
| RAB3D       | RAB3D       | 105.2094971 | 294.0322879 | 202.9409448 |             |
| 248.1323024 |             |             |             |             |             |
| BAG2        | BAG2        | 4089.628569 | 3334.713493 | 1923.478735 |             |
| 2445.034901 |             |             |             |             |             |
| BAG3        | BAG3        | 1838.562003 | 2241.335943 | 1842.079345 |             |
| 2117.461031 |             |             |             |             |             |
| PIGL        | PIGL        | 577.0897165 | 425.2023805 | 508.4674221 |             |
| 474.6878829 |             |             |             |             |             |
| CLCA2       | CLCA2       | 3.125034566 | 0           | 0           | 0           |
| ZNF518A     | ZNF518A     | 984.3858883 | 1280.889159 | 1326.921562 |             |
| 1018.028972 |             |             |             |             |             |
| BMS1        | BMS1        | 8657.387426 | 6297.044777 | 8395.287766 |             |
| 8381.575718 |             |             |             |             |             |
| PRCC        | PRCC        | 4549.00865  | 3736.146796 | 3706.459893 |             |
| 3743.561258 |             |             |             |             |             |
| LTV1        | LTV1        | 5607.35369  | 3675.403599 | 5084.674221 |             |
| 4770.417071 |             |             |             |             |             |
| SNORA14B    | SNORA14B    |             | 2.083356377 | 0           | 4.460240545 |
|             | 11.76912106 |             |             |             |             |
| MSH6        | MSH6        | 10904.28728 | 11860.76951 | 8660.672078 |             |
| 11913.2928  |             |             |             |             |             |
| PQLC2       | PQLC2       | 636.4653733 | 481.5438967 | 373.5451456 |             |
| 502.1491654 |             |             |             |             |             |
| IKZF3       | IKZF3       | 6027.15     | 12226.10903 | 7473.133033 | 8386.479518 |
| DTYMK       | DTYMK       | 7799.044599 | 6047.909635 | 4924.105562 |             |
| 5528.54462  |             |             |             |             |             |
| MED12       | MED12       | 1363.556749 | 4443.056758 | 1868.840788 |             |
| 2159.633715 |             |             |             |             |             |

|             |             |             |               |               |
|-------------|-------------|-------------|---------------|---------------|
| SERGEF      | SERGEF      | 933.3436571 | 934.0366991   | 981.2529199   |
| 1283.814956 |             |             |               |               |
| YWHAZ       | YWHAZ       | 119985.7022 | 97093.15889   | 76577.86992   |
| 78400.98073 |             |             |               |               |
| TPM1        | TPM1        | 183.3353612 | 163.7425316   | 249.7734705   |
| 282.4589055 |             |             |               |               |
| TMEM230     | TMEM230     | 7172.996007 | 6209.011158   | 7616.975791   |
| 6780.975253 |             |             |               |               |
| LGALS9C     | LGALS9C     | 12.50013826 | 0.880336191   | 0 0           |
| GSPT2       | GSPT2       | 915.6351279 | 918.1906477   | 835.1800421   |
| 968.0102075 |             |             |               |               |
| ENOX1       | ENOX1       | 50.00055306 | 38.73479242   | 122.656615    |
| 86.3068878  |             |             |               |               |
| TTC14       | TTC14       | 1307.306127 | 1226.308315   | 1440.657696   |
| 1265.180514 |             |             |               |               |
| MRPS21      | MRPS21      | 3707.332674 | 4305.724312   | 3632.865924   |
| 3844.579548 |             |             |               |               |
| LARP4       | LARP4       | 8645.928966 | 6399.163776   | 8427.62451    |
| 6144.461956 |             |             |               |               |
| PLAC8       | PLAC8       | 242.711018  | 903.2249324   | 3838.036989   |
| 5337.296403 |             |             |               |               |
| NOX5        | NOX5        | 7.291747321 | 27.29042193   | 16.72590204   |
| 26.48052239 |             |             |               |               |
| E2F5        | E2F5        | 345.8371586 | 426.9630528   | 491.7415201   |
| 515.8798066 |             |             |               |               |
| FANCA       | FANCA       | 4665.676607 | 5848.07332    | 2901.386475   |
| 4490.900446 |             |             |               |               |
| PODXL       | PODXL       | 70.83411683 | 211.2806859   | 95.89517172   |
| 139.2679326 |             |             |               |               |
| CDC42SE2    | CDC42SE2    |             | 30550.33792   | 12878.43814   |
| 43501.8411  | 11546.48852 |             |               |               |
| C7orf57     | C7orf57     | 16.66685102 | 0 16.72590204 | 14.71140133   |
| GLP1R       | GLP1R       | 0 0         | 1.115060136   | 10.78836098   |
| RAPGEF5     | RAPGEF5     | 7.291747321 | 21.12806859   | 15.61084191   |
| 32.36508293 |             |             |               |               |
| MCM3        | MCM3        | 27990.93461 | 24266.46712   | 20131.2957    |
| 26039.18035 |             |             |               |               |
| ADAMTSL3    | ADAMTSL3    |             | 1.041678189   | 0 1.115060136 |
| 5.884560532 |             |             |               |               |
| CCSER1      | CCSER1      | 0 0         | 20.07108245   | 8.826840798   |
| ATP6V0A1    | ATP6V0A1    |             | 1620.851262   | 914.6693029   |
| 966.7571381 | 1168.085266 |             |               |               |
| EXOC4       | EXOC4       | 2207.316082 | 2483.428396   | 2276.952798   |
| 2935.414945 |             |             |               |               |
| IRAK4       | IRAK4       | 1986.480306 | 1909.449199   | 1721.65285    |
| 2052.730866 |             |             |               |               |
| ELK4        | ELK4        | 798.9671707 | 1362.760424   | 1518.711906   |
| 1297.545597 |             |             |               |               |
| TRPV2       | TRPV2       | 7813.628093 | 5635.912298   | 2924.802737   |
| 3609.197126 |             |             |               |               |

|          |          |             |             |             |   |
|----------|----------|-------------|-------------|-------------|---|
| PKD2L1   | PKD2L1   | 3.125034566 | 2.641008574 | 0           | 0 |
| C1orf194 | C1orf194 | 30.10662368 | 3.125034566 | 14.96571525 |   |
| RBM12B   | RBM12B   | 1750.656758 | 1668.237083 | 1875.531149 |   |
| C12orf42 | C12orf42 | 7.805420954 | 5.208390943 | 5.282017149 |   |
| AUP1     | AUP1     | 7711.716577 | 7683.574279 | 8232.488986 |   |
| SLC46A3  | SLC46A3  | 790.6337452 | 808.1486237 | 1202.034827 |   |
| EML2     | EML2     | 4116.250092 | 3110.227764 | 2573.558795 |   |
| ZSCAN9   | ZSCAN9   | 105.9220896 | 106.5206792 | 130.4620359 |   |
| DAGLA    | DAGLA    | 1.041678189 | 23.76907717 | 33.45180409 |   |
| RPGRIP1  | RPGRIP1  | 22.55748204 | 7.923025723 | 3.345180409 |   |
| BTBD10   | BTBD10   | 2326.36293  | 2623.40185  | 2872.394911 |   |
| WHSC1    | WHSC1    | 5998.328702 | 12523.66266 | 4113.456843 |   |
| ZNF7     | ZNF7     | 1715.349395 | 1119.787636 | 1892.257051 |   |
| 7-Mar    | 7-Mar    | 8832.725359 | 8922.2073   | 10424.69721 |   |
| TBL1XR1  | TBL1XR1  | 6407.305659 | 7615.788392 | 5363.439255 |   |
| PCDHB9   | PCDHB9   | 0           | 11.15060136 | 0.980760089 |   |
| NOX1     | NOX1     | 46.09572417 | 32.57243908 | 43.48734531 |   |
| PRC1     | PRC1     | 4405.574318 | 6485.436722 | 3259.320778 |   |
| CHMP2B   | CHMP2B   | 2199.844879 | 2151.541652 | 2405.184714 |   |
| CPNE2    | CPNE2    | 495.2838448 | 597.748274  | 403.6517693 |   |
| ETNK2    | ETNK2    | 214.7864594 | 35.21344766 | 228.5873279 |   |
| SAGE1    | SAGE1    | 0           | 1.760672383 | 0           |   |
| DDX43    | DDX43    | 46.09572417 | 100.3583258 | 41.25722504 |   |
| DDX49    | DDX49    | 2647.071479 | 2506.317137 | 2745.278055 |   |
| LPO      | LPO      | 0.980760089 | 2.641008574 | 7.805420954 |   |
| TNFAIP3  | TNFAIP3  | 19693.66258 | 12278.04886 | 17444.00077 |   |
| TST      | TST      | 441.671552  | 555.4921368 | 130.4620359 |   |

|              |              |             |             |             |   |
|--------------|--------------|-------------|-------------|-------------|---|
| 321.6893091  |              |             |             |             |   |
| PTP4A3       | PTP4A3       | 1451.057717 | 533.483732  | 1925.708855 |   |
| 1742.810678  |              |             |             |             |   |
| GLCE         | GLCE         | 310.4201002 | 365.3395194 | 447.1391146 |   |
| 381.5156745  |              |             |             |             |   |
| RNF113A      | RNF113A      | 1943.7715   | 1662.955066 | 1930.169096 |   |
| 1885.02089   |              |             |             |             |   |
| SUSD5        | SUSD5        | 3.125034566 | 4.401680957 | 0           | 0 |
| PLEKHG3      | PLEKHG3      | 760.4250777 | 927.8743458 | 241.9680496 |   |
| 315.8047486  |              |             |             |             |   |
| DMC1         | DMC1         | 694.7993519 | 853.0457695 | 308.8716577 |   |
| 602.1866944  |              |             |             |             |   |
| KAT7         | KAT7         | 5552.144746 | 4963.335447 | 5836.224753 |   |
| 5672.716353  |              |             |             |             |   |
| CDC37        | CDC37        | 6283.402834 | 7985.529593 | 4790.298345 |   |
| 5681.543194  |              |             |             |             |   |
| INTS5        | INTS5        | 4240.671906 | 4025.777403 | 3687.503871 |   |
| 4116.250092  |              |             |             |             |   |
| DAB1         | DAB1         | 8.33342551  | 36.97412004 | 1.115060136 |   |
| 7.846080709  |              |             |             |             |   |
| CHST11       | CHST11       | 5521.936078 | 3772.24058  | 2222.314852 |   |
| 2151.787635  |              |             |             |             |   |
| PAX6         | PAX6         | 31.25034566 | 29.05109432 | 35.68192436 |   |
| 17.6536816   |              |             |             |             |   |
| BPGM         | BPGM         | 3736.499663 | 1812.612218 | 2910.306956 |   |
| 1762.425879  |              |             |             |             |   |
| RNF138       | RNF138       | 5026.09726  | 4471.227516 | 7115.19873  |   |
| 5561.890463  |              |             |             |             |   |
| CACNB3       | CACNB3       | 28.12531109 | 136.4521097 | 75.82408927 |   |
| 89.24916807  |              |             |             |             |   |
| CD22         | CD22         | 1.041678189 | 5.282017149 | 2.230120273 |   |
| 11.76912106  |              |             |             |             |   |
| RAB22A       | RAB22A       | 5134.431792 | 4275.792882 | 5079.098921 |   |
| 4745.898069  |              |             |             |             |   |
| DNAJC10      | DNAJC10      | 4989.638524 | 4359.42482  | 5028.921215 |   |
| 5109.760062  |              |             |             |             |   |
| LRRC2-AS1    | LRRC2-AS1    |             | 0           | 0.880336191 | 0 |
| MAGEA8-AS1   | MAGEA8-AS1   |             | 1.041678189 | 0           | 0 |
| 1.961520177  |              |             |             |             |   |
| LOC284581    | LOC284581    |             | 52.08390943 | 193.6739621 |   |
| 112.6210738  | 283.4396656  |             |             |             |   |
| MIR137HG     | MIR137HG     |             | 1.041678189 | 0           | 0 |
| LINC01146    | LINC01146    |             | 10.41678189 | 18.48706002 | 0 |
| 13.38072164  | 12.74988115  |             |             |             |   |
| LOC654841    | LOC654841    |             | 18.7502074  | 7.042689532 |   |
| 20.07108245  | 28.44204257  |             |             |             |   |
| TRAF3IP2-AS1 | TRAF3IP2-AS1 |             | 196.8771777 | 315.1603565 |   |
| 405.8818896  | 414.8615175  |             |             |             |   |
| RNF185       | RNF185       | 3407.329355 | 2624.282187 | 4150.253827 |   |
| 3697.465534  |              |             |             |             |   |



|              |              |             |             |             |            |
|--------------|--------------|-------------|-------------|-------------|------------|
| MKKS         | MKKS         | 2095.856516 | 2155.943333 | 2240.155814 |            |
| 2356.766493  |              |             |             |             |            |
| ATG14        | ATG14        | 293.7532492 | 323.0833823 | 844.1005232 |            |
| 727.7239858  |              |             |             |             |            |
| ZNF767P      | ZNF767P      | 173.9602575 | 153.1784973 | 384.695747  |            |
| 560.9947707  |              |             |             |             |            |
| MUC20        | MUC20        | 25.00027653 | 27.29042193 | 12.2656615  |            |
| 22.55748204  |              |             |             |             |            |
| TMEM14B      | TMEM14B      | 7478.207717 | 6492.479412 | 6139.52111  |            |
| 5698.216115  |              |             |             |             |            |
| FTL          | FTL          | 131481.6627 | 84680.41859 | 151524.4069 |            |
| 70081.1929   |              |             |             |             |            |
| LOC101927051 | LOC101927051 |             | 554.1727964 | 1512.417577 |            |
| 352.3590031  | 563.937051   |             |             |             |            |
| KCNJ1        | KCNJ1        | 7.291747321 | 7.923025723 | 0           | 0          |
| CLEC4A       | CLEC4A       | 10.41678189 | 23.76907717 | 12.2656615  |            |
| 14.71140133  |              |             |             |             |            |
| RNF212       | RNF212       | 12.50013826 | 40.49546481 | 33.45180409 |            |
| 68.65320621  |              |             |             |             |            |
| SEMA6D       | SEMA6D       | 0           | 0.880336191 | 0           | 0          |
| SF3A2        | SF3A2        | 1309.389483 | 2005.405844 | 1500.870943 |            |
| 1274.007355  |              |             |             |             |            |
| SLC16A5      | SLC16A5      | 59.37565676 | 121.4863944 | 140.4975772 |            |
| 233.4209011  |              |             |             |             |            |
| PRKRIR       | PRKRIR       | 2473.985698 | 2657.734962 | 3029.61839  |            |
| 2422.477419  |              |             |             |             |            |
| RABEP1       | RABEP1       | 5017.763835 | 5832.227268 | 6346.922296 |            |
| 6389.651978  |              |             |             |             |            |
| LINC01372    | LINC01372    |             | 0           | 1.760672383 | 12.2656615 |
| 0            |              |             |             |             |            |
| CAPS         | CAPS         | 78.12586415 | 85.39261057 | 78.05420954 |            |
| 73.55700665  |              |             |             |             |            |
| ARHGAP29     | ARHGAP29     |             | 3.125034566 | 0           | 0          |
| TIMM8B       | TIMM8B       | 3446.913126 | 3727.343435 | 2983.900925 | 0          |
| 2809.877654  |              |             |             |             |            |
| TIMM9        | TIMM9        | 1592.725951 | 1615.416911 | 1917.903434 |            |
| 1574.119942  |              |             |             |             |            |
| TIMM13       | TIMM13       | 4780.261208 | 3772.24058  | 3623.945443 |            |
| 3620.966247  |              |             |             |             |            |
| TIMM10       | TIMM10       | 6130.27614  | 3897.248319 | 4160.289368 |            |
| 3716.099976  |              |             |             |             |            |
| SETD1B       | SETD1B       | 332.2953422 | 447.2107853 | 551.9547675 |            |
| 306.9779078  |              |             |             |             |            |
| LY6K         | LY6K         | 0           | 0           | 0.980760089 |            |
| PDE7A        | PDE7A        | 3882.334609 | 5218.632943 | 2774.269619 |            |
| 3091.355799  |              |             |             |             |            |
| PCOLCE       | PCOLCE       | 61.45901313 | 35.21344766 | 51.29276627 |            |
| 55.90332505  |              |             |             |             |            |
| PCSK2        | PCSK2        | 0           | 3.345180409 | 0           |            |
| PTPRU        | PTPRU        | 3.125034566 | 19.36739621 | 7.805420954 |            |

|             |          |             |             |             |             |
|-------------|----------|-------------|-------------|-------------|-------------|
| 22.55748204 |          |             |             |             |             |
| TMEM208     | TMEM208  | 4439.63244  | 3268.688279 | 3141.124404 |             |
| 3071.740598 |          |             |             |             |             |
| SLC38A6     | SLC38A6  | 281.2531109 | 285.228926  | 238.6228692 |             |
| 343.266031  |          |             |             |             |             |
| DBX1        | DBX1     | 0           | 4.460240545 | 5.884560532 |             |
| HNRNPH2     | HNRNPH2  | 8717.804761 | 8093.810944 | 10555.15925 |             |
| 9424.123692 |          |             |             |             |             |
| SUOX        | SUOX     | 1000.011061 | 455.133811  | 312.2168382 |             |
| 445.2650803 |          |             |             |             |             |
| ZNF562      | ZNF562   | 572.9230038 | 666.4144969 | 1002.439063 |             |
| 864.0496381 |          |             |             |             |             |
| VN1R1       | VN1R1    | 14.58349464 | 7.042689532 | 20.07108245 |             |
| 1.961520177 |          |             |             |             |             |
| ATP6V0A4    | ATP6V0A4 |             | 10.41678189 | 133.8111011 |             |
| 2.230120273 |          | 139.2679326 |             |             |             |
| FGF23       | FGF23    | 5.208390943 | 11.44437049 | 10.03554123 |             |
| 18.63444168 |          |             |             |             |             |
| ALPK1       | ALPK1    | 142.7099119 | 265.8615298 | 1876.646209 |             |
| 1323.04536  |          |             |             |             |             |
| RTN1        | RTN1     | 5.208390943 | 4.401680957 | 0           | 2.942280266 |
| HECTD1      | HECTD1   | 3294.828111 | 4163.109849 | 3931.70204  |             |
| 3748.465059 |          |             |             |             |             |
| UMPS        | UMPS     | 6937.576737 | 5379.734466 | 5563.03502  |             |
| 6203.307561 |          |             |             |             |             |
| SF1         | SF1      | 8898.015088 | 13895.22645 | 10215.06591 |             |
| 9327.028443 |          |             |             |             |             |
| HEIH        | HEIH     | 959.3856118 | 1005.343931 | 1765.140196 |             |
| 1157.296905 |          |             |             |             |             |
| KIF19       | KIF19    | 11.45846008 | 19.36739621 | 2.230120273 |             |
| 7.846080709 |          |             |             |             |             |
| EBAG9       | EBAG9    | 1262.513965 | 1244.795375 | 1797.47694  |             |
| 1513.312817 |          |             |             |             |             |
| DYNLRB1     | DYNLRB1  | 5076.097814 | 5292.581183 | 4323.088148 |             |
| 4109.384772 |          |             |             |             |             |
| CYP3A43     | CYP3A43  | 0           | 12.2656615  | 0           |             |
| DYDC2       | DYDC2    | 0           | 0           | 9.807600887 |             |
| CAPG        | CAPG     | 5700.063049 | 2266.865693 | 1752.874534 |             |
| 1150.431584 |          |             |             |             |             |
| IGSF9B      | IGSF9B   | 83.3342551  | 177.8279107 | 176.1795015 |             |
| 183.4021366 |          |             |             |             |             |
| YPEL3       | YPEL3    | 1532.308616 | 2069.670386 | 2273.607618 |             |
| 2197.883359 |          |             |             |             |             |
| SFXN4       | SFXN4    | 2504.194366 | 1833.740287 | 1941.319697 |             |
| 2138.056993 |          |             |             |             |             |
| ABCG2       | ABCG2    | 621.8818787 | 1385.649165 | 162.7987799 |             |
| 513.9182865 |          |             |             |             |             |
| CRLF1       | CRLF1    | 0           | 1.760672383 | 6.690360818 | 5.884560532 |
| IRS1        | IRS1     | 1.041678189 | 110.0420239 | 68.01866831 |             |
| 23.53824213 |          |             |             |             |             |

|             |           |             |             |             |             |
|-------------|-----------|-------------|-------------|-------------|-------------|
| GUCY1A3     | GUCY1A3   | 9.375103698 | 8.803361914 | 0           | 5.884560532 |
| GXYLT1      | GXYLT1    | 1105.220558 | 1141.79604  | 1190.884226 |             |
| 875.8187592 |           |             |             |             |             |
| MARVELD3    | MARVELD3  | 10.78836098 | 10.41678189 | 3.521344766 | 0           |
| ALAD        | ALAD      | 1563.558961 | 1620.698928 | 1358.143246 |             |
| 1699.657234 |           |             |             |             |             |
| LOC200726   | LOC200726 | 0           | 0           | 1.115060136 | 0           |
| KCNK6       | KCNK6     | 914.5934497 | 998.3012411 | 922.1547327 |             |
| 1141.604743 |           |             |             |             |             |
| PLD1        | PLD1      | 194.7938213 | 420.8006995 | 46.83252572 |             |
| 138.2871725 |           |             |             |             |             |
| NLRP3       | NLRP3     | 5.208390943 | 0.880336191 | 117.0813143 |             |
| 166.7292151 |           |             |             |             |             |
| KCNS3       | KCNS3     | 3.125034566 | 1.760672383 | 7.805420954 | 0           |
| SH3BP2      | SH3BP2    | 1683.351953 | 2569.701343 | 1234.371571 |             |
| 1775.17576  |           |             |             |             |             |
| RGS1        | RGS1      | 15692.88191 | 8039.2301   | 22106.0672  |             |
| 8298.21111  |           |             |             |             |             |
| SNAP25      | SNAP25    | 7.291747321 | 20.2477324  | 56.86806695 |             |
| 61.78788559 |           |             |             |             |             |
| RFX3        | RFX3      | 314.586813  | 442.8091043 | 645.6198189 |             |
| 441.3420399 |           |             |             |             |             |
| SLC16A1     | SLC16A1   | 10880.32868 | 7739.915795 | 7110.738489 |             |
| 6309.22965  |           |             |             |             |             |
| MPP1        | MPP1      | 1739.602575 | 2214.045521 | 1454.038418 |             |
| 1771.25272  |           |             |             |             |             |
| C12orf56    | C12orf56  | 6.865320621 | 4.166712755 | 0.880336191 | 0           |
| EIF4EBP3    | EIF4EBP3  | 449.3692349 | 141.6682337 | 187.5116088 |             |
| 371.7080736 |           |             |             |             |             |
| SSNA1       | SSNA1     | 4460.466004 | 4138.460436 | 3363.021371 |             |
| 3473.852234 |           |             |             |             |             |
| EVC2        | EVC2      | 39.58377117 | 242.9727888 | 55.75300681 |             |
| 133.3833721 |           |             |             |             |             |
| AANAT       | AANAT     | 4.166712755 | 0           | 1.961520177 |             |
| NIPAL4      | NIPAL4    | 83.3342551  | 29.05109432 | 65.78854804 |             |
| 180.4598563 |           |             |             |             |             |
| SYNJ2       | SYNJ2     | 2189.607553 | 4656.978453 | 1933.514276 |             |
| 2395.016137 |           |             |             |             |             |
| CCDC23      | CCDC23    | 594.7982457 | 658.4914712 | 557.5300681 |             |
| 463.8995219 |           |             |             |             |             |
| LRR37A3     | LRR37A3   | 45.71746559 | 16.66685102 | 25.52974955 |             |
| 36.28812328 |           |             |             |             |             |
| SLC43A3     | SLC43A3   | 18518.95484 | 12607.2946  | 15214.99556 |             |
| 18715.84477 |           |             |             |             |             |
| XCL2        | XCL2      | 89.58432423 | 15.84605145 | 728.134269  |             |
| 224.5940603 |           |             |             |             |             |
| SUPV3L1     | SUPV3L1   | 4447.965866 | 2999.305404 | 3551.466534 |             |
| 3728.849857 |           |             |             |             |             |

|             |           |             |             |             |
|-------------|-----------|-------------|-------------|-------------|
| WDR65       | WDR65     | 39.58377117 | 16.72638764 | 78.05420954 |
| 51.9802847  |           |             |             |             |
| MDM4        | MDM4      | 1018.761269 | 1119.787636 | 2031.639568 |
| 1333.833721 |           |             |             |             |
| SPHK2       | SPHK2     | 1219.805159 | 1434.067656 | 1191.999286 |
| 1149.450824 |           |             |             |             |
| FOXO3       | FOXO3     | 542.7143363 | 612.7139892 | 1383.789629 |
| 928.779804  |           |             |             |             |
| FOXJ1       | FOXJ1     | 3.125034566 | 2.641008574 | 14.49578177 |
| 3.923040355 |           |             |             |             |
| FOXC1       | FOXC1     | 1.041678189 | 0           | 0           |
| IKBKB       | IKBKB     | 2731.280211 | 4382.313561 | 2299.254001 |
| 3169.816607 |           |             |             |             |
| GPC4        | GPC4      | 0           | 21.12806859 | 1.115060136 |
| FABP5       | FABP5     | 8549.052895 | 9128.205969 | 7502.124597 |
| 10652.03532 |           |             |             |             |
| NFKB2       | NFKB2     | 10039.69438 | 9010.240919 | 12227.74945 |
| 12103.56025 |           |             |             |             |
| NFIX        | NFIX      | 3.125034566 | 10.5640343  | 27.87650341 |
| 11.76912106 |           |             |             |             |
| NDUFB3      | NDUFB3    | 8866.764742 | 9524.357255 | 6242.106643 |
| 6834.917058 |           |             |             |             |
| ATP2C1      | ATP2C1    | 3055.242127 | 4499.398274 | 2554.602772 |
| 2212.59476  |           |             |             |             |
| SLC1A4      | SLC1A4    | 16069.96942 | 12622.26031 | 4364.345373 |
| 4021.116364 |           |             |             |             |
| UBR2        | UBR2      | 3308.369927 | 4491.475249 | 4795.873646 |
| 4790.032273 |           |             |             |             |
| CHRNA10     | CHRNA10   | 16.66685102 | 15.84605145 | 13.38072164 |
| 15.69216142 |           |             |             |             |
| EBI3        | EBI3      | 1029.17805  | 530.8427234 | 1173.043263 |
| 989.5869295 |           |             |             |             |
| KLRG1       | KLRG1     | 214.5857069 | 143.4947992 | 312.2168382 |
| 459.9764816 |           |             |             |             |
| MPZL2       | MPZL2     | 164.5851538 | 103.8796706 | 744.860171  |
| 635.5325375 |           |             |             |             |
| IER3        | IER3      | 0           | 136.4521097 | 0           |
| NAGLU       | NAGLU     | 551.0477618 | 725.3970217 | 731.4794494 |
| 868.9534386 |           |             |             |             |
| NAGA        | NAGA      | 5358.392603 | 5783.808778 | 2646.037703 |
| 3907.348193 |           |             |             |             |
| AGAP2-AS1   | AGAP2-AS1 |             | 122.9180263 | 200.7166516 |
| 84.74457036 |           | 138.2871725 |             |             |
| TCAIM       | TCAIM     | 1368.76514  | 1094.257886 | 1101.679415 |
| 1112.181941 |           |             |             |             |
| GLRA4       | GLRA4     | 4.166712755 | 0.880336191 | 14.49578177 |
| 2.942280266 |           |             |             |             |
| TRIM71      | TRIM71    | 0           | 10.5640343  | 0           |
| MOSPD3      | MOSPD3    | 904.1766678 | 540.5264215 | 496.2017606 |
| 529.6104479 |           |             |             |             |

|             |             |             |             |             |             |
|-------------|-------------|-------------|-------------|-------------|-------------|
| KALRN       | KALRN       | 1.041678189 | 8.803361914 | 59.09818722 |             |
| 66.69168603 |             |             |             |             |             |
| CCDC180     | CCDC180     | 45.8338403  | 34.33311147 | 79.16926967 |             |
| 56.88408514 |             |             |             |             |             |
| UBE2J1      | UBE2J1      | 7628.209376 | 9577.177427 | 4615.233904 |             |
| 6026.770745 |             |             |             |             |             |
| BABAM1      | BABAM1      | 7899.045705 | 6319.053182 | 4763.536902 |             |
| 5658.985712 |             |             |             |             |             |
| NACC1       | NACC1       | 101.0427843 | 540.5264215 | 127.1168555 |             |
| 167.7099752 |             |             |             |             |             |
| TMTC3       | TMTC3       | 437.5048393 | 465.6978453 | 550.8397073 |             |
| 415.8422776 |             |             |             |             |             |
| FAM104A     | FAM104A     | 10321.98917 | 7378.09762  | 6142.866291 |             |
| 5741.369559 |             |             |             |             |             |
| ZNF841      | ZNF841      | 416.6712755 | 352.1344766 | 444.9089944 |             |
| 493.3223246 |             |             |             |             |             |
| BTF3L4      | BTF3L4      | 3717.749455 | 3390.174673 | 3817.965907 |             |
| 3621.947007 |             |             |             |             |             |
| HOMER3      | HOMER3      | 3.125034566 | 10.5640343  | 8.92048109  |             |
| 6.865320621 |             |             |             |             |             |
| C16orf45    | C16orf45    |             | 697.9243864 | 562.5348263 |             |
| 489.5113998 | 640.4363379 |             |             |             |             |
| LOXL1-AS1   | LOXL1-AS1   |             | 100.0011061 | 241.2121165 |             |
| 129.3469758 | 529.6104479 |             |             |             |             |
| UAP1        | UAP1        | 2876.073479 | 2569.701343 | 3859.223132 |             |
| 3526.813279 |             |             |             |             |             |
| POC1B       | POC1B       | 3989.627463 | 2943.844224 | 2565.753374 |             |
| 2608.821836 |             |             |             |             |             |
| CDC5L       | CDC5L       | 6471.946586 | 5166.693108 | 4991.00917  |             |
| 5161.740347 |             |             |             |             |             |
| RASGRF1     | RASGRF1     | 1.041678189 | 2.641008574 | 1.115060136 |             |
| 7.846080709 |             |             |             |             |             |
| TSPAN6      | TSPAN6      | 0           | 142.7276974 | 30.40356275 |             |
| ALS2CR12    | ALS2CR12    |             | 18.7502074  | 26.41008574 |             |
| 50.17770613 | 70.61472638 |             |             |             |             |
| SZT2        | SZT2        | 314.586813  | 1204.29991  | 922.1547327 |             |
| 675.7437011 |             |             |             |             |             |
| PLA2G2C     | PLA2G2C     | 4.166712755 | 2.641008574 | 3.345180409 |             |
| 10.78836098 |             |             |             |             |             |
| C7orf73     | C7orf73     | 3769.833365 | 4141.981781 | 3097.637059 |             |
| 3514.063398 |             |             |             |             |             |
| ZNF135      | ZNF135      | 0           | 14.96571525 | 46.83252572 | 122.5950111 |
| LRRC75A-AS1 | LRRC75A-AS1 |             | 7631.33441  | 4094.443626 |             |
| 8633.910635 | 6071.885709 |             |             |             |             |
| LY86-AS1    | LY86-AS1    |             | 0           | 0           | 18.95602232 |
| 5.884560532 |             |             |             |             |             |
| EFCAB10     | EFCAB10     | 640.632086  | 463.0568367 | 597.672233  |             |
| 454.0919211 |             |             |             |             |             |
| LINC00114   | LINC00114   |             | 0           | 0           | 5.575300681 |
| SOD1        | SOD1        | 23452.34274 | 16230.75836 | 24661.78503 | 0           |

|               |             |             |             |             |
|---------------|-------------|-------------|-------------|-------------|
| 16080.54241   |             |             |             |             |
| CSF3R CSF3R   | 1.041678189 | 0           | 0           | 0           |
| LOC253573     | LOC253573   | 13.54181645 |             | 1.760672383 |
| 16.72590204   | 29.42280266 |             |             |             |
| LINC00630     | LINC00630   | 188.5437522 |             | 187.5116088 |
| 175.0644414   | 140.2486927 |             |             |             |
| PNPLA8 PNPLA8 | 2592.737012 | 2632.205212 |             | 3360.791251 |
| 2536.245589   |             |             |             |             |
| RDX RDX       | 3974.00229  | 3606.737376 |             | 2366.157609 |
| 2563.706872   |             |             |             |             |
| SYT14 SYT14   | 0           | 0           | 1.115060136 | 0           |
| ZNF484 ZNF484 | 516.6723816 | 558.1331454 |             | 1134.016159 |
| 757.1467885   |             |             |             |             |
| ITCH ITCH     | 2414.610041 | 2787.144382 |             | 1600.111296 |
| 2085.095949   |             |             |             |             |
| ZFR ZFR       | 9119.892542 | 7495.182334 |             | 9998.744242 |
| 8822.917758   |             |             |             |             |
| LDHA LDHA     | 198671.9892 | 182424.1459 |             | 146572.4248 |
| 221252.6107   |             |             |             |             |
| HCN3 HCN3     | 47.91719668 | 87.15328295 |             | 42.37228518 |
| 61.78788559   |             |             |             |             |
| MPC1 MPC1     | 1582.309169 | 1301.136891 |             | 1873.301029 |
| 1306.372438   |             |             |             |             |
| CRIP2 CRIP2   | 165.626832  | 26.41008574 |             | 72.47890886 |
| 84.34536763   |             |             |             |             |
| TSSK4 TSSK4   | 35.41705842 | 67.78588674 |             | 127.1168555 |
| 88.26840798   |             |             |             |             |
| WNT9A WNT9A   | 0           | 3.521344766 | 0           | 0           |
| MAD2L2 MAD2L2 | 4215.67163  | 4191.280607 |             | 3200.222591 |
| 3551.332281   |             |             |             |             |
| PANK2 PANK2   | 3915.668311 | 3217.62878  |             | 3635.096044 |
| 3360.084064   |             |             |             |             |
| MLX MLX       | 6772.991583 | 4428.971379 |             | 5335.562752 |
| 4914.588804   |             |             |             |             |
| WDR20 WDR20   | 2301.067119 | 1711.373556 |             | 2385.113631 |
| 2205.729439   |             |             |             |             |
| KIAA1804      | KIAA1804    | 97.91774974 |             | 249.1351422 |
| 306.6415375   | 175.5560559 |             |             |             |
| MAPT MAPT     | 1.041678189 | 3.521344766 |             | 15.61084191 |
| 14.71140133   |             |             |             |             |
| SBN01 SBN01   | 7035.494486 | 6987.228351 |             | 7366.08726  |
| 6880.032022   |             |             |             |             |
| ZNF546 ZNF546 | 301.0449965 | 328.3653994 |             | 497.3168208 |
| 537.4565286   |             |             |             |             |
| TAP1 TAP1     | 673.9657881 | 21.12806859 |             | 586.5216317 |
| 56.88408514   |             |             |             |             |
| MDK MDK       | 53.12558762 | 106.5206792 |             | 277.6499739 |
| 198.1135379   |             |             |             |             |
| ADAM11 ADAM11 | 4.166712755 | 0           | 30.10662368 | 7.846080709 |
| NME3 NME3     | 959.3856118 | 1308.17958  |             | 723.6740284 |

|                       |               |               |             |   |  |
|-----------------------|---------------|---------------|-------------|---|--|
| 1019.990492           |               |               |             |   |  |
| GPNMB GPNMB           | 115.6262789   | 89.79429153   | 50.17770613 |   |  |
| 59.82636541           |               |               |             |   |  |
| NKX2-2 NKX2-2         | 33.33370204   | 29.05109432   | 25.64638313 |   |  |
| 26.48052239           |               |               |             |   |  |
| POLR2E POLR2E         | 13704.31825   | 11898.62396   | 9447.904535 |   |  |
| 11171.83817           |               |               |             |   |  |
| UTS2 UTS2             | 14.58349464   | 10.5640343    | 10.03554123 |   |  |
| 22.55748204           |               |               |             |   |  |
| MALT1 MALT1           | 4103.170385   | 5424.631612   | 6019.094616 |   |  |
| 5205.874551           |               |               |             |   |  |
| GPR148 GPR148         | 1.041678189   | 0 0           | 0           |   |  |
| ZC3H12D ZC3H12D       | 4482.341246   | 6288.241415   | 2906.961775 |   |  |
| 5166.644147           |               |               |             |   |  |
| SNORA18 SNORA18       | 23.95859834   | 49.29882672   | 23.41626286 |   |  |
| 27.46128248           |               |               |             |   |  |
| SNORD100 SNORD100     |               | 13.54181645   | 10.5640343  |   |  |
| 39.02710477           | 38.24964346   |               |             |   |  |
| SNORD101 SNORD101     |               | 6.250069132   | 11.44437049 |   |  |
| 15.61084191           | 7.846080709   |               |             |   |  |
| SNORD12C SNORD12C     |               | 95.83439336   | 116.2043773 |   |  |
| 169.4891407           | 126.5180514   |               |             |   |  |
| AXDND1 AXDND1         | 3.125034566   | 0.880336191   | 4.460240545 | 0 |  |
| SNORA9 SNORA9         | 111.4595662   | 70.42689532   | 139.382517  |   |  |
| 141.2294528           |               |               |             |   |  |
| NEK6 NEK6             | 585.423142    | 245.6137974   | 1123.980617 |   |  |
| 423.6883583           |               |               |             |   |  |
| ST20-MTHFS ST20-MTHFS |               | 1369.806818   | 1237.752685 |   |  |
| 1587.845634           | 1880.11709    |               |             |   |  |
| MTHFS MTHFS           | 1182.304744   | 1081.933179   | 1487.490222 |   |  |
| 1695.734193           |               |               |             |   |  |
| PPP2R5A PPP2R5A       | 3003.158218   | 4259.94683    | 3263.781019 |   |  |
| 3167.855086           |               |               |             |   |  |
| SLC26A5 SLC26A5       | 2.083356377   | 1.760672383   | 2.230120273 | 0 |  |
| MIR6511B1 MIR6511B1   |               | 10.41678189   | 17.60672383 |   |  |
| 15.61084191           | 9.807600887   |               |             |   |  |
| MIR6717 MIR6717       | 9.375103698   | 7.042689532   | 55.75300681 |   |  |
| 35.30736319           |               |               |             |   |  |
| MIR6716 MIR6716       | 1.041678189   | 0 1.115060136 | 0           |   |  |
| MIR6514 MIR6514       | 4.166712755   | 9.683698106   | 11.15060136 |   |  |
| 2.942280266           |               |               |             |   |  |
| MIR6515 MIR6515       | 32.29202385   | 48.41849053   | 34.56686422 |   |  |
| 24.51900222           |               |               |             |   |  |
| MIR6513 MIR6513       | 153.1266937   | 142.614463    | 142.7276974 |   |  |
| 122.5950111           |               |               |             |   |  |
| MIR6512 MIR6512       | 0 0.880336191 | 0             | 2.942280266 |   |  |
| GALNT2 GALNT2         | 3335.45356    | 7207.312399   | 2582.479276 |   |  |
| 4589.957215           |               |               |             |   |  |
| HMBS HMBS             | 4061.503258   | 3188.577685   | 2408.529894 |   |  |
| 3309.084539           |               |               |             |   |  |

|             |             |             |             |             |             |
|-------------|-------------|-------------|-------------|-------------|-------------|
| BMP5        | BMP5        | 1.041678189 | 0           | 0           | 0           |
| NDUFA12     | NDUFA12     | 10014.69411 | 9887.055766 |             | 6676.980096 |
| 7123.260524 |             |             |             |             |             |
| SULF2       | SULF2       | 98.95942793 | 49.29882672 |             | 84.74457036 |
| 108.8643698 |             |             |             |             |             |
| AMICA1      | AMICA1      | 7115.703707 | 4820.720984 |             | 10123.63098 |
| 8358.037476 |             |             |             |             |             |
| MIR7845     | MIR7845     | 0           | 1.760672383 | 3.345180409 | 0.980760089 |
| MIR7844     | MIR7844     | 0           | 9.683698106 | 0           | 8.826840798 |
| MIR6516     | MIR6516     | 58.33397857 | 30.8117667  |             | 63.55842777 |
| 53.94180488 |             |             |             |             |             |
| MIR1273H    | MIR1273H    |             | 21.87524196 |             | 10.5640343  |
| 32.33674395 | 33.34584301 |             |             |             |             |
| MIR7843     | MIR7843     | 1.041678189 | 0           | 0           | 0           |
| ATP11A-AS1  | ATP11A-AS1  |             | 10.41678189 |             | 4.401680957 |
| 26.76144327 | 5.884560532 |             |             |             |             |
| DLG3-AS1    | DLG3-AS1    |             | 27.08363291 |             | 25.52974955 |
| 3.345180409 | 11.76912106 |             |             |             |             |
| MIR7162     | MIR7162     | 0           | 0           | 3.923040355 |             |
| ATPAF1      | ATPAF1      | 6951.118553 | 4938.686034 |             | 5787.162107 |
| 5555.025142 |             |             |             |             |             |
| ATP11C      | ATP11C      | 466.6718285 | 894.4215705 |             | 656.7704203 |
| 864.0496381 |             |             |             |             |             |
| MYBPHL      | MYBPHL      | 6.250069132 | 0.880336191 | 0           | 0.980760089 |
| USP6NL      | USP6NL      | 187.502074  | 173.4262297 |             | 650.0800594 |
| 280.4973854 |             |             |             |             |             |
| ATXN2L      | ATXN2L      | 1766.686208 | 6006.533834 |             | 2769.809378 |
| 2253.786684 |             |             |             |             |             |
| CASP8AP2    | CASP8AP2    |             | 1885.437522 |             | 2545.051929 |
| 2831.137686 | 2656.87908  |             |             |             |             |
| ANAPC7      | ANAPC7      | 4750.05254  | 3947.427482 |             | 3337.374988 |
| 3967.174559 |             |             |             |             |             |
| EPHA1       | EPHA1       | 7.291747321 | 14.96571525 |             | 325.5975598 |
| 218.7094998 |             |             |             |             |             |
| TENM1       | TENM1       | 57.29230038 | 73.06790389 |             | 110.3909535 |
| 60.8071255  |             |             |             |             |             |
| PRPF40A     | PRPF40A     | 14003.27989 | 11454.05419 |             | 12032.61393 |
| 12488.99897 |             |             |             |             |             |
| MVK         | MVK         | 103.1261407 | 331.006408  |             | 92.54999131 |
| 140.2486927 |             |             |             |             |             |
| C1orf159    | C1orf159    |             | 1111.470627 |             | 1048.480404 |
| 1014.704724 | 978.7985685 |             |             |             |             |
| NCS1        | NCS1        | 140.6265555 | 191.0329535 |             | 104.8156528 |
| 302.0741073 |             |             |             |             |             |
| CELSR1      | CELSR1      | 6.250069132 | 28.17075813 | 0           | 15.69216142 |
| EIF2B2      | EIF2B2      | 3854.209298 | 3523.985774 |             | 2724.091913 |
| 3013.875752 |             |             |             |             |             |
| TMEM176B    | TMEM176B    |             | 0           | 0           | 11.15060136 |
| TEX101      | TEX101      | 0           | 5.575300681 |             | 1.961520177 |
| SMARCC2     | SMARCC2     | 6068.817127 | 9369.418085 |             | 6314.585552 |



|             |         |             |             |               |
|-------------|---------|-------------|-------------|---------------|
| 7390.027268 |         |             |             |               |
| CASP9       | CASP9   | 1258.347252 | 1897.124493 | 500.6620012   |
| 832.6653153 |         |             |             |               |
| PXYLP1      | PXYLP1  | 464.5884722 | 717.473996  | 966.7571381   |
| 685.551302  |         |             |             |               |
| NPRL3       | NPRL3   | 1140.637617 | 1556.434386 | 827.3746211   |
| 1072.951537 |         |             |             |               |
| COMMD5      | COMMD5  | 2217.732864 | 1851.347011 | 1923.478735   |
| 2097.84583  |         |             |             |               |
| NR2C1       | NR2C1   | 1191.679848 | 1134.753351 | 992.4035213   |
| 1138.662463 |         |             |             |               |
| CAPN14      | CAPN14  | 15.62517283 | 88.91395534 | 13.38072164   |
| 56.88408514 |         |             |             |               |
| GAS6        | GAS6    | 52.08390943 | 76.58924866 | 30.10662368   |
| 105.9220896 |         |             |             |               |
| RASGRP4     | RASGRP4 | 691.6743173 | 191.0329535 | 179.5246819   |
| 175.5560559 |         |             |             |               |
| CACNA1D     | CACNA1D | 104.1678189 | 25.52974955 | 8.92048109    |
| 8.826840798 |         |             |             |               |
| SPG11       | SPG11   | 2164.607276 | 3744.950158 | 3050.804533   |
| 3608.216366 |         |             |             |               |
| TMEM189     | TMEM189 | 3265.661122 | 3162.1676   | 2032.754628   |
| 2172.383596 |         |             |             |               |
| TPBG        | TPBG    | 1.041678189 | 8.803361914 | 39.02710477   |
| 30.40356275 |         |             |             |               |
| YIPF4       | YIPF4   | 3488.580254 | 3224.671469 | 3349.640649   |
| 3092.33656  |         |             |             |               |
| CHCHD5      | CHCHD5  | 906.2600242 | 1187.573522 | 732.5945095   |
| 735.5700665 |         |             |             |               |
| KLHL4       | KLHL4   | 19.79188559 | 4.401680957 | 0 5.884560532 |
| TUBB4A      | TUBB4A  | 116.6679571 | 139.0931182 | 162.7987799   |
| 141.2294528 |         |             |             |               |
| KDM4A       | KDM4A   | 2203.149369 | 2015.089542 | 1626.872739   |
| 1554.504741 |         |             |             |               |
| PICK1       | PICK1   | 487.5053923 | 412.8776738 | 526.3083843   |
| 738.5123468 |         |             |             |               |
| CDK14       | CDK14   | 62.50069132 | 80.99092961 | 28.99156354   |
| 64.73016585 |         |             |             |               |
| GIPC2       | GIPC2   | 2.083356377 | 19.36739621 | 34.56686422   |
| 53.94180488 |         |             |             |               |
| CYR61       | CYR61   | 4.166712755 | 1.760672383 | 0 0           |
| MRPS28      | MRPS28  | 2988.574723 | 2608.436135 | 2518.920848   |
| 2373.439415 |         |             |             |               |
| POLR3D      | POLR3D  | 1557.308892 | 1263.282435 | 1777.405857   |
| 1693.772673 |         |             |             |               |
| IGFBP4      | IGFBP4  | 2030.23079  | 2449.095285 | 1087.183633   |
| 2305.766968 |         |             |             |               |
| LETMD1      | LETMD1  | 967.7190373 | 934.9170353 | 1059.307129   |
| 1281.853436 |         |             |             |               |
| PSPC1       | PSPC1   | 3802.125389 | 3081.17667  | 2835.597927   |

|             |             |             |             |             |
|-------------|-------------|-------------|-------------|-------------|
| 2523.495708 |             |             |             |             |
| THEM6       | THEM6       | 1016.677912 | 1632.143299 | 1034.775806 |
| 1264.199754 |             |             |             |             |
| ZNF771      | ZNF771      | 228.1275233 | 193.6739621 | 230.8174482 |
| 237.3439415 |             |             |             |             |
| PRSS50      | PRSS50      | 0           | 0           | 3.345180409 |
| 13.73064124 |             |             |             |             |
| TMEM245     | TMEM245     | 4485.466281 | 3993.204964 | 6416.056024 |
| 3760.23418  |             |             |             |             |
| GORASP1     | GORASP1     | 3111.49275  | 2751.930934 | 2250.191355 |
| 2569.591432 |             |             |             |             |
| C9orf24     | C9orf24     | 7.291747321 | 29.93143051 | 22.30120273 |
| 15.69216142 |             |             |             |             |
| HBP1        | HBP1        | 3252.119305 | 2628.683868 | 10022.1605  |
| 6319.037251 |             |             |             |             |
| STRIP2      | STRIP2      | 3779.208469 | 3435.952155 | 1393.82517  |
| 2727.493807 |             |             |             |             |
| TFDP2       | TFDP2       | 1371.890175 | 1858.3897   | 880.8975076 |
| 1166.123745 |             |             |             |             |
| ERGIC3      | ERGIC3      | 5317.767153 | 4478.270206 | 3933.932161 |
| 4002.481922 |             |             |             |             |
| RDH5        | RDH5        | 170.8352229 | 223.6053926 | 173.9493813 |
| 127.4988115 |             |             |             |             |
| COR01C      | COR01C      | 5644.854105 | 7867.564543 | 2751.968416 |
| 5914.964095 |             |             |             |             |
| AMACR       | AMACR       | 683.3408918 | 521.1590253 | 867.516786  |
| 776.7619902 |             |             |             |             |
| ALG6        | ALG6        | 3096.909255 | 2457.898646 | 2003.763065 |
| 1976.231579 |             |             |             |             |
| DPP7        | DPP7        | 5019.847191 | 4923.720319 | 4193.741172 |
| 5623.678348 |             |             |             |             |
| ZFP69B      | ZFP69B      | 148.959981  | 98.59765344 | 327.8276801 |
| 132.402612  |             |             |             |             |
| SIGIRR      | SIGIRR      | 1256.263896 | 1736.903306 | 906.5438908 |
| 1871.290249 |             |             |             |             |
| FMR1-AS1    | FMR1-AS1    |             | 65.62572589 | 65.14487817 |
| 100.3554123 | 70.61472638 |             |             |             |
| ADAM6       | ADAM6       | 0           | 0           | 6.690360818 |
| 0           |             |             |             |             |
| NUDT8       | NUDT8       | 197.9188559 | 285.228926  | 233.0475685 |
| 355.0351521 |             |             |             |             |
| B3GNT6      | B3GNT6      | 0           | 0           | 1.115060136 |
| 0           |             |             |             |             |
| WARS        | WARS        | 70230.98516 | 35158.86681 | 83649.5813  |
| 47472.71133 |             |             |             |             |
| C15orf62    | C15orf62    |             | 13.54181645 | 17.60672383 |
| 23.41626286 | 10.78836098 |             |             |             |
| HAUS2       | HAUS2       | 2211.482795 | 2395.394777 | 2094.082936 |
| 1893.847731 |             |             |             |             |
| C10orf131   | C10orf131   |             | 8.33342551  | 13.20504287 |
| 7.805420954 | 9.807600887 |             |             |             |
| TNP01       | TNP01       | 5903.190295 | 6764.503295 | 6216.46026  |
| 6473.016585 |             |             |             |             |

|             |             |             |             |               |
|-------------|-------------|-------------|-------------|---------------|
| S1PR4       | S1PR4       | 13517.85785 | 10334.26655 | 4789.183285   |
| 5080.337259 |             |             |             |               |
| ERICH3-AS1  | ERICH3-AS1  | 1.041678189 | 0           | 0 0           |
| SPIB        | SPIB        | 3.125034566 | 14.08537906 | 0 11.76912106 |
| SEMA3C      | SEMA3C      | 0           | 5.282017149 | 0 2.942280266 |
| SELPLG      | SELPLG      | 35091.01314 | 29903.25975 | 14797.96307   |
| 14841.84242 |             |             |             |               |
| SLC22A5     | SLC22A5     | 259.377869  | 296.6732965 | 390.2710477   |
| 374.6503539 |             |             |             |               |
| RECQL       | RECQL       | 13878.27851 | 12599.37157 | 9334.168401   |
| 11390.54767 |             |             |             |               |
| HLA-DMB     | HLA-DMB     | 0           | 49.29882672 | 0 17.6536816  |
| S100A3      | S100A3      | 1.041678189 | 14.08537906 | 0 5.884560532 |
| ALG13       | ALG13       | 1989.60534  | 1527.383292 | 1941.319697   |
| 1640.811628 |             |             |             |               |
| C9orf153    | C9orf153    | 1.041678189 | 4.401680957 |               |
| 20.07108245 | 12.74988115 |             |             |               |
| DYRK1A      | DYRK1A      | 203.1272468 | 317.8013651 | 347.8987625   |
| 195.1712576 |             |             |             |               |
| RHBDF2      | RHBDF2      | 1356.265002 | 1064.326455 | 1632.448039   |
| 1916.405213 |             |             |             |               |
| PCBD2       | PCBD2       | 1159.387824 | 1008.865275 | 878.6673874   |
| 841.4921561 |             |             |             |               |
| ARL6        | ARL6        | 301.0449965 | 183.990264  | 359.0493639   |
| 266.7667441 |             |             |             |               |
| ZRANB3      | ZRANB3      | 339.5870895 | 385.5872518 | 218.5517867   |
| 377.5926341 |             |             |             |               |
| RBL1        | RBL1        | 4680.260102 | 5724.826253 | 3713.150254   |
| 4657.629661 |             |             |             |               |
| EIF5AL1     | EIF5AL1     | 80.20922053 | 46.65781815 | 47.94758586   |
| 28.44204257 |             |             |             |               |
| GAB3        | GAB3        | 533.3392326 | 809.0289599 | 356.8192436   |
| 392.3040355 |             |             |             |               |
| NOXRED1     | NOXRED1     | 5.208390943 | 18.48706002 | 35.68192436   |
| 13.73064124 |             |             |             |               |
| HIGD1A      | HIGD1A      | 13879.32019 | 11901.26497 | 8670.70762    |
| 9623.21799  |             |             |             |               |
| MAP3K19     | MAP3K19     | 2.083356377 | 5.282017149 | 0 0           |
| KCNIP4      | KCNIP4      | 9.375103698 | 14.96571525 | 32.33674395   |
| 15.69216142 |             |             |             |               |
| SNORA28     | SNORA28     | 20.83356377 | 19.36739621 | 28.99156354   |
| 34.3266031  |             |             |             |               |
| SNORD102    | SNORD102    | 32.29202385 | 33.45277527 |               |
| 40.14216491 | 43.1534439  |             |             |               |
| SNORD58B    | SNORD58B    | 259.377869  | 214.8020307 |               |
| 296.6059962 | 232.440141  |             |             |               |
| NIPAL2      | NIPAL2      | 43.75048393 | 95.07630868 | 60.21324736   |
| 88.26840798 |             |             |             |               |
| HRASLS5     | HRASLS5     | 6.250069132 | 6.16235334  | 12.2656615    |
| 21.57672195 |             |             |             |               |

|          |          |             |             |             |             |
|----------|----------|-------------|-------------|-------------|-------------|
| ALDH3A1  | ALDH3A1  | 0           | 1.760672383 | 0           | 3.923040355 |
| TPTE2    | TPTE2    | 7.291747321 | 5.282017149 |             | 1.115060136 |
|          |          | 2.942280266 |             |             |             |
| UPK3BL   | UPK3BL   | 628.1319478 | 701.6279446 |             | 656.7704203 |
|          |          | 690.4551024 |             |             |             |
| SRP54    | SRP54    | 9961.568519 | 7432.678464 |             | 8653.981718 |
|          |          | 7576.371685 |             |             |             |
| EIF2S3   | EIF2S3   | 7838.62837  | 6345.463268 |             | 7475.363154 |
|          |          | 6021.866944 |             |             |             |
| ZNF345   | ZNF345   | 250.0027653 | 251.7761508 |             | 618.8583756 |
|          |          | 433.4959592 |             |             |             |
| MIB2     | MIB2     | 440.6298738 | 456.0141472 |             | 636.6993378 |
|          |          | 643.3786182 |             |             |             |
| ADCK4    | ADCK4    | 792.7171016 | 1022.950654 |             | 719.2137879 |
|          |          | 773.81971   |             |             |             |
| DDX3Y    | DDX3Y    | 2.083356377 | 7056.774911 | 0           | 8024.579045 |
| ADAD2    | ADAD2    | 7.291747321 | 0           | 15.61084191 | 3.923040355 |
| PLIN3    | PLIN3    | 3960.460473 | 4556.620127 |             | 1979.231742 |
|          |          | 4008.366482 |             |             |             |
| XIAP     | XIAP     | 564.5895783 | 839.8407266 |             | 936.6505145 |
|          |          | 632.5902572 |             |             |             |
| SPG20    | SPG20    | 2425.026823 | 3001.066077 |             | 5231.862159 |
|          |          | 3675.888812 |             |             |             |
| SEMA7A   | SEMA7A   | 131.2514518 | 482.4242329 |             | 265.3843124 |
|          |          | 604.1482146 |             |             |             |
| NFE2L2   | NFE2L2   | 7680.293285 | 6351.625621 |             | 12619.13556 |
|          |          | 8854.30208  |             |             |             |
| LSM2     | LSM2     | 0           | 0           | 0.980760089 |             |
| ZNF696   | ZNF696   | 237.502627  | 320.4423737 |             | 458.289716  |
|          |          | 451.1496408 |             |             |             |
| SNAPC5   | SNAPC5   | 2100.023228 | 1899.765501 |             | 2247.961235 |
|          |          | 2036.057944 |             |             |             |
| SUCLG1   | SUCLG1   | 6433.404493 | 6351.625621 |             | 4663.18149  |
|          |          | 4313.38287  |             |             |             |
| MAMLD1   | MAMLD1   | 912.5100933 | 1859.270036 |             | 696.9125852 |
|          |          | 625.7249366 |             |             |             |
| POFUT2   | POFUT2   | 271.8780073 | 463.0568367 |             | 486.1662194 |
|          |          | 350.1313517 |             |             |             |
| TM2D3    | TM2D3    | 2762.530556 | 2382.189734 |             | 3001.741887 |
|          |          | 2417.573619 |             |             |             |
| TSEN34   | TSEN34   | 1294.805989 | 1147.958394 |             | 1730.573331 |
|          |          | 1664.34987  |             |             |             |
| PVRIG    | PVRIG    | 4018.794452 | 3679.80528  |             | 3225.868974 |
|          |          | 3922.059595 |             |             |             |
| SPATA5L1 | SPATA5L1 |             | 1101.053845 |             | 874.1738381 |
|          |          | 985.7131605 | 1043.528734 |             |             |
| SMAD4    | SMAD4    | 4326.089518 | 4480.911214 |             | 6689.245757 |
|          |          | 5698.216115 |             |             |             |
| GSC2     | GSC2     | 0           | 1.115060136 | 0           |             |
| SOX15    | SOX15    | 63.54236951 | 65.14487817 |             | 56.86806695 |

|              |              |             |             |             |             |
|--------------|--------------|-------------|-------------|-------------|-------------|
| 40.21116364  |              |             |             |             |             |
| ATE1         | ATE1         | 3047.95038  | 2821.477494 | 2377.308211 |             |
| 2602.937275  |              |             |             |             |             |
| MRPL28       | MRPL28       | 6880.284436 | 4778.464847 | 3742.141817 |             |
| 4559.553652  |              |             |             |             |             |
| SIVA1        | SIVA1        | 8201.13238  | 6922.083473 | 6547.63312  |             |
| 6271.960767  |              |             |             |             |             |
| OR1A2        | OR1A2        | 0           | 0.880336191 | 1.115060136 | 0           |
| FBX09        | FBX09        | 4592.759134 | 3656.916539 | 3187.95693  |             |
| 4488.938926  |              |             |             |             |             |
| SDF2         | SDF2         | 3866.709436 | 2559.137309 | 2953.794301 |             |
| 2683.359603  |              |             |             |             |             |
| SCN3A        | SCN3A        | 0           | 21.12806859 | 0           | 12.74988115 |
| SIRT5        | SIRT5        | 743.7582267 | 707.7902979 | 854.1360644 |             |
| 973.894768   |              |             |             |             |             |
| LOC101927131 | LOC101927131 | 0           | 0.880336191 | 0           | 0           |
| LGALS9       | LGALS9       | 1380.2236   | 2200.840479 | 1018.049904 |             |
| 560.9947707  |              |             |             |             |             |
| TR0          | TR0          | 40.62544936 | 68.66622293 | 146.0728779 |             |
| 148.0947734  |              |             |             |             |             |
| CLIP2        | CLIP2        | 8.33342551  | 97.71731725 | 110.3909535 |             |
| 64.73016585  |              |             |             |             |             |
| MYBPC2       | MYBPC2       | 3.125034566 | 0           | 12.2656615  | 11.76912106 |
| SSH1         | SSH1         | 1286.472563 | 2649.811936 | 1380.444449 |             |
| 1278.911156  |              |             |             |             |             |
| RAB1B        | RAB1B        | 867.7179312 | 2866.374639 | 476.1306782 |             |
| 600.2251743  |              |             |             |             |             |
| ACRV1        | ACRV1        | 12.50013826 | 30.8117667  | 10.03554123 |             |
| 8.826840798  |              |             |             |             |             |
| MSH3         | MSH3         | 2190.649231 | 2581.145713 | 1274.513736 |             |
| 1782.041081  |              |             |             |             |             |
| STX18        | STX18        | 2017.730652 | 1629.50229  | 1630.217919 |             |
| 1550.5817    |              |             |             |             |             |
| CCDC132      | CCDC132      | 1745.852644 | 1348.675045 | 1747.299234 |             |
| 1580.985263  |              |             |             |             |             |
| ACADVL       | ACADVL       | 20356.47516 | 15553.77983 | 11995.81695 |             |
| 15896.15952  |              |             |             |             |             |
| RPL3L        | RPL3L        | 0           | 1.760672383 | 0           | 1.961520177 |
| PLCL1        | PLCL1        | 331.253664  | 234.1694269 | 1089.413753 |             |
| 834.6268355  |              |             |             |             |             |
| CLTA         | CLTA         | 8703.221267 | 6914.160448 | 6213.115079 |             |
| 5549.140582  |              |             |             |             |             |
| SMTN         | SMTN         | 908.3433805 | 1147.078057 | 656.7704203 |             |
| 863.068878   |              |             |             |             |             |
| CNRIP1       | CNRIP1       | 0           | 0           | 2.942280266 |             |
| MTMR9        | MTMR9        | 1133.345869 | 939.3187163 | 1255.557713 |             |
| 1190.642748  |              |             |             |             |             |
| CNOT6        | CNOT6        | 2353.151028 | 3094.381713 | 2139.800401 |             |
| 2388.150816  |              |             |             |             |             |
| PHF12        | PHF12        | 434.3798047 | 1235.992013 | 945.5709956 |             |

|              |              |             |             |             |             |
|--------------|--------------|-------------|-------------|-------------|-------------|
| 611.0135352  |              |             |             |             |             |
| PLEKHN1      | PLEKHN1      | 54.16726581 | 42.25613719 | 59.09818722 |             |
| 99.05676896  |              |             |             |             |             |
| TMBIM6       | TMBIM6       | 81599.86091 | 62488.90388 | 74206.13701 |             |
| 67572.40859  |              |             |             |             |             |
| CEP44        | CEP44        | 1245.847114 | 1524.742284 | 1282.319157 |             |
| 1283.814956  |              |             |             |             |             |
| ETV3         | ETV3         | 167.7101884 | 110.0420239 | 234.1626286 |             |
| 103.9605694  |              |             |             |             |             |
| PGAM1        | PGAM1        | 40846.28514 | 32130.51032 | 28371.59011 |             |
| 44879.58166  |              |             |             |             |             |
| ADAMTS4      | ADAMTS4      | 59.37565676 | 25.52974955 | 59.09818722 |             |
| 25.49976231  |              |             |             |             |             |
| CPNE9        | CPNE9        | 2.083356377 | 2.641008574 | 7.805420954 |             |
| 0.980760089  |              |             |             |             |             |
| MYT1L        | MYT1L        | 0           | 19.36739621 | 0           | 4.903800443 |
| CHSY1        | CHSY1        | 720.8413066 | 766.7728227 | 656.7704203 |             |
| 532.5527281  |              |             |             |             |             |
| ZNF607       | ZNF607       | 190.6271085 | 187.5116088 | 580.946331  |             |
| 457.0342013  |              |             |             |             |             |
| TFPT         | TFPT         | 1042.719867 | 922.5923286 | 534.1138053 |             |
| 772.8389499  |              |             |             |             |             |
| LPAR3        | LPAR3        | 0           | 0           | 117.0813143 | 0           |
| PRDX1        | PRDX1        | 35146.22209 | 32172.76645 | 27844.16666 |             |
| 23632.3951   |              |             |             |             |             |
| VIPR1-AS1    | VIPR1-AS1    |             | 2.083356377 | 4.401680957 |             |
| 60.21324736  | 51.9802847   |             |             |             |             |
| YIF1B        | YIF1B        | 3452.121517 | 3166.569281 | 1917.903434 |             |
| 2329.305211  |              |             |             |             |             |
| CTD-220I18.1 | CTD-220I18.1 |             | 6.250069132 | 8.803361914 |             |
| 26.76144327  | 37.26888337  |             |             |             |             |
| LOC101928796 | LOC101928796 |             | 4.166712755 | 0.880336191 | 0           |
| 0.980760089  |              |             |             |             |             |
| MRPL11       | MRPL11       | 5086.514595 | 4057.469506 | 3745.486998 |             |
| 3932.847956  |              |             |             |             |             |
| KIF27        | KIF27        | 144.7932682 | 179.5885831 | 240.8529894 |             |
| 255.9783831  |              |             |             |             |             |
| MLNR         | MLNR         | 0           | 0.880336191 | 1.115060136 | 8.826840798 |
| MDM2         | MDM2         | 10921.99581 | 9572.775746 | 8601.573891 |             |
| 5284.335358  |              |             |             |             |             |
| MEST         | MEST         | 150.0016592 | 183.1099278 | 350.1288828 |             |
| 362.8812328  |              |             |             |             |             |
| KRT1         | KRT1         | 13.54181645 | 5.282017149 | 0           | 56.88408514 |
| HLA-DMA      | HLA-DMA      | 261.4612254 | 311.6390118 | 102.5855325 |             |
| 127.4988115  |              |             |             |             |             |
| KIF26B       | KIF26B       | 4.166712755 | 0.880336191 | 4.460240545 |             |
| 37.26888337  |              |             |             |             |             |
| CLIC5        | CLIC5        | 626.0485914 | 823.9946752 | 541.9192262 |             |
| 481.5532035  |              |             |             |             |             |
| TRDN         | TRDN         | 0           | 0           | 2.230120273 | 0           |

|             |         |             |             |             |
|-------------|---------|-------------|-------------|-------------|
| DEK         | DEK     | 10474.07419 | 9797.261475 | 9689.872584 |
| 9288.7788   |         |             |             |             |
| USP7        | USP7    | 1776.061312 | 2393.634105 | 1718.30767  |
| 1772.23348  |         |             |             |             |
| FZD5        | FZD5    | 6.250069132 | 15.84605145 | 33.45180409 |
| 36.28812328 |         |             |             |             |
| IL4         | IL4     | 553.1311182 | 100.3583258 | 312.2168382 |
| 35.30736319 |         |             |             |             |
| IL2         | IL2     | 137.5015209 | 93.31563629 | 112.6210738 |
| 788.5311113 |         |             |             |             |
| ALPL        | ALPL    | 1.041678189 | 0           | 0           |
| ZNF81       | ZNF81   | 178.1269703 | 262.340185  | 240.8529894 |
| 203.9980984 |         |             |             |             |
| C4A         | C4A     | 1.041678189 | 0           | 3.345180409 |
| PCDHGA3     | PCDHGA3 | 4.166712755 | 4.401680957 | 2.942280266 |
| 10.78836098 |         |             |             | 33.45180409 |
| RTFDC1      | RTFDC1  | 10239.69659 | 7967.922869 | 7270.192088 |
| 7235.067174 |         |             |             |             |
| PRND        | PRND    | 0           | 0           | 1.115060136 |
| CPSF3       | CPSF3   | 9764.691341 | 7456.447541 | 7293.608351 |
| 8235.442465 |         |             |             |             |
| MMRN1       | MMRN1   | 42.70880574 | 54.58084387 | 0           |
| DNA2        | DNA2    | 2918.782285 | 2937.681871 | 9.807600887 |
| 1918.366733 |         |             |             | 1665.899844 |
| FCAMR       | FCAMR   | 0           | 5.282017149 | 0           |
| AIF1L       | AIF1L   | 26.04195472 | 29.05109432 | 51.29276627 |
| 28.44204257 |         |             |             |             |
| SEC23B      | SEC23B  | 14483.49354 | 10780.597   | 10450.3436  |
| 11120.83865 |         |             |             |             |
| OGG1        | OGG1    | 1958.354995 | 2052.063662 | 1425.046854 |
| 2395.016137 |         |             |             |             |
| NFRKB       | NFRKB   | 2523.986251 | 2395.394777 | 3085.371397 |
| 2997.202831 |         |             |             |             |
| WDR89       | WDR89   | 1839.603681 | 1421.742949 | 3193.53223  |
| 2353.824213 |         |             |             |             |
| DTD2        | DTD2    | 547.9227273 | 522.0393615 | 602.1324736 |
| 653.1862191 |         |             |             |             |
| INSL4       | INSL4   | 0           | 0           | 2.942280266 |
| NEU1        | NEU1    | 0           | 0           | 3.345180409 |
| ZBTB14      | ZBTB14  | 1075.011891 | 1272.966133 | 1121.750497 |
| 1274.988115 |         |             |             |             |
| RANGRF      | RANGRF  | 4159.421007 | 3347.0382   | 2468.743142 |
| 2988.37599  |         |             |             |             |
| ADIPOQ      | ADIPOQ  | 0           | 0           | 2.942280266 |
| SCOC        | SCOC    | 3350.037055 | 3170.090625 | 4092.2707   |
| 3766.11874  |         |             |             |             |
| HNRNPD      | HNRNPD  | 25144.02812 | 24695.19084 | 19160.07832 |
| 21818.96969 |         |             |             |             |
| PTPRC       | PTPRC   | 58076.68405 | 65408.09869 | 54705.96535 |
| 77071.07005 |         |             |             |             |

|             |          |             |             |   |             |
|-------------|----------|-------------|-------------|---|-------------|
| TACC2       | TACC2    | 3.125034566 | 0           | 0 | 0           |
| PLGRKT      | PLGRKT   | 1700.018804 | 1622.459601 |   | 1203.149887 |
| 1709.464835 |          |             |             |   |             |
| BATF3       | BATF3    | 793.7587798 | 1889.201467 |   | 1803.05224  |
| 1777.137281 |          |             |             |   |             |
| KIAA1407    | KIAA1407 |             | 65.62572589 |   | 71.30723151 |
| 71.36384872 |          | 117.6912106 |             |   |             |
| ADIPOR2     | ADIPOR2  | 432.2964483 | 876.8148467 |   | 518.5029634 |
| 429.5729188 |          |             |             |   |             |
| SMPD3       | SMPD3    | 321.8785603 | 122.3667306 |   | 279.8800942 |
| 95.1337286  |          |             |             |   |             |
| FAM13A      | FAM13A   | 189.5854303 | 44.01680957 |   | 2174.367266 |
| 99.05676896 |          |             |             |   |             |
| CYTL1       | CYTL1    | 0           | 2.641008574 | 0 | 0           |
| ZNF395      | ZNF395   | 271.8780073 | 759.7301332 |   | 880.8975076 |
| 1430.928969 |          |             |             |   |             |
| ACP6        | ACP6     | 347.920515  | 443.6894405 |   | 322.2523794 |
| 654.1669791 |          |             |             |   |             |
| ABL2        | ABL2     | 164.5851538 | 286.9895984 |   | 389.1559876 |
| 304.0356275 |          |             |             |   |             |
| COQ10B      | COQ10B   | 5347.975821 | 3579.446954 |   | 4937.486283 |
| 3350.276463 |          |             |             |   |             |
| CD101       | CD101    | 556.2561528 | 503.5523015 |   | 316.6770787 |
| 292.2665064 |          |             |             |   |             |
| GBAP1       | GBAP1    | 284.3781455 | 231.5284183 |   | 266.4993726 |
| 335.4199503 |          |             |             |   |             |
| LM02        | LM02     | 1.041678189 | 0           | 0 | 0           |
| ZFAND5      | ZFAND5   | 12091.80041 | 9017.283609 |   | 10520.59239 |
| 8924.916807 |          |             |             |   |             |
| TMEM38A     | TMEM38A  | 152.0850156 | 110.9223601 |   | 70.24878858 |
| 70.61472638 |          |             |             |   |             |
| ZFYVE21     | ZFYVE21  | 1177.096353 | 829.2766923 |   | 1467.419139 |
| 1221.04631  |          |             |             |   |             |
| BAIAP2      | BAIAP2   | 112.5012444 | 135.5717735 |   | 233.0475685 |
| 199.094298  |          |             |             |   |             |
| TTLL2       | TTLL2    | 0           | 1.760672383 | 0 | 2.942280266 |
| FLRT1       | FLRT1    | 4.166712755 | 10.5640343  |   | 6.690360818 |
| 22.55748204 |          |             |             |   |             |
| C7orf25     | C7orf25  | 1136.470904 | 929.6350182 |   | 1103.909535 |
| 861.1073579 |          |             |             |   |             |
| KCTD15      | KCTD15   | 23.95859834 | 86.27294676 |   | 12.2656615  |
| 40.21116364 |          |             |             |   |             |
| VPS41       | VPS41    | 5580.270057 | 4342.698432 |   | 3885.984575 |
| 4434.016361 |          |             |             |   |             |
| RP1L1       | RP1L1    | 1.041678189 | 0           | 0 | 0           |
| STARD13     | STARD13  | 70.83411683 | 139.9734544 |   | 22.30120273 |
| 65.71092594 |          |             |             |   |             |
| RAP2A       | RAP2A    | 956.2605772 | 1895.36382  |   | 917.6944921 |
| 633.5710173 |          |             |             |   |             |
| SIRT2       | SIRT2    | 4341.71469  | 3126.954152 |   | 2622.62144  |



|             |             |             |             |             |
|-------------|-------------|-------------|-------------|-------------|
| 2503.880506 |             |             |             |             |
| VDAC1       | VDAC1       | 24679.43965 | 19311.93503 | 18400.72237 |
| 22728.13429 |             |             |             |             |
| TMEM184C    | TMEM184C    |             | 3501.080392 | 2607.555799 |
| 3763.32796  | 3033.490954 |             |             |             |
| KLHL21      | KLHL21      | 3440.663057 | 3029.236835 | 7943.688411 |
| 4221.191422 |             |             |             |             |
| PRKG2       | PRKG2       | 46.87551849 | 83.63193819 | 80.28432981 |
| 35.30736319 |             |             |             |             |
| DNAJC3      | DNAJC3      | 2743.780349 | 2808.272451 | 2850.093708 |
| 1804.598563 |             |             |             |             |
| TXNDC9      | TXNDC9      | 5158.39039  | 3861.154536 | 3787.859283 |
| 3873.02159  |             |             |             |             |
| XP05        | XP05        | 6042.775173 | 5898.252483 | 5772.666325 |
| 5561.890463 |             |             |             |             |
| TMEM60      | TMEM60      | 1558.35057  | 1348.675045 | 1367.063727 |
| 1147.489304 |             |             |             |             |
| DENND1A     | DENND1A     | 461.4634376 | 623.2780235 | 587.6366918 |
| 579.6292124 |             |             |             |             |
| DEPDC7      | DEPDC7      | 103.1261407 | 132.9307649 | 185.0999826 |
| 142.2102129 |             |             |             |             |
| C9orf66     | C9orf66     | 334.3786986 | 249.1351422 | 179.5246819 |
| 138.2871725 |             |             |             |             |
| C4orf45     | C4orf45     | 1.041678189 | 0           | 0           |
| CLN8        | CLN8        | 783.3419979 | 691.0639103 | 812.8788393 |
| 934.6643645 |             |             |             |             |
| UNC50       | UNC50       | 3108.367715 | 2327.60889  | 3154.505125 |
| 2982.49143  |             |             |             |             |
| SCN5A       | SCN5A       | 1.041678189 | 3.521344766 | 16.72590204 |
| 9.807600887 |             |             |             |             |
| DCAF13      | DCAF13      | 11580.33642 | 7765.445545 | 8333.959458 |
| 9420.200652 |             |             |             |             |
| PDC         | PDC         | 0           | 1.760672383 | 3.345180409 |
| GPR135      | GPR135      | 17.70852921 | 17.60672383 | 4.460240545 |
| 17.6536816  |             |             |             |             |
| EAPP        | EAPP        | 2955.241021 | 2467.582345 | 4282.945983 |
| 3561.139882 |             |             |             |             |
| FER         | FER         | 219.7940978 | 205.1183326 | 405.8818896 |
| 391.3232754 |             |             |             |             |
| BCAN        | BCAN        | 27.08363291 | 36.97412004 | 34.56686422 |
| 37.26888337 |             |             |             |             |
| TEAD4       | TEAD4       | 45.8338403  | 57.22185244 | 30.10662368 |
| 63.74940576 |             |             |             |             |
| CCDC62      | CCDC62      | 17.70852921 | 15.84605145 | 24.531323   |
| 20.59596186 |             |             |             |             |
| DENND5A     | DENND5A     | 2033.355824 | 684.0212207 | 6348.037356 |
| 2856.954138 |             |             |             |             |
| TIGD6       | TIGD6       | 475.005254  | 473.620871  | 715.8686075 |
| 508.0337259 |             |             |             |             |
| EFHD1       | EFHD1       | 36.4587366  | 27.29042193 | 97.01023186 |

|             |          |             |             |             |             |
|-------------|----------|-------------|-------------|-------------|-------------|
| 39.23040355 |          |             |             |             |             |
| RAB5C       | RAB5C    | 2003.147157 | 2374.266708 | 1061.53725  |             |
| 1019.990492 |          |             |             |             |             |
| GAS7        | GAS7     | 11.45846008 | 27.29042193 | 21.18614259 |             |
| 21.57672195 |          |             |             |             |             |
| RASSF6      | RASSF6   | 0           | 1.760672383 | 6.690360818 | 0           |
| CADPS       | CADPS    | 0           | 0           | 4.460240545 | 0           |
| RGL2        | RGL2     | 0           | 4.401680957 | 0           | 0.980760089 |
| DNM1L       | DNM1L    | 8113.631412 | 6872.784647 | 4749.04112  |             |
| 6052.270507 |          |             |             |             |             |
| DGKG        | DGKG     | 89.58432423 | 37.85445623 | 61.32830749 |             |
| 95.1337286  |          |             |             |             |             |
| ZNF578      | ZNF578   | 19.79188559 | 6.16235334  | 71.36384872 |             |
| 21.57672195 |          |             |             |             |             |
| FNDC3A      | FNDC3A   | 1836.478647 | 1945.542983 | 4117.917083 |             |
| 2821.646775 |          |             |             |             |             |
| SON         | SON      | 9889.692723 | 14640.8712  | 14787.92753 |             |
| 12158.48282 |          |             |             |             |             |
| IGFL2       | IGFL2    | 1.041678189 | 1.760672383 | 12.2656615  | 0           |
| ATE1-AS1    | ATE1-AS1 |             | 41.66712755 | 38.73479242 |             |
| 51.29276627 |          | 37.26888337 |             |             |             |
| PAK6        | PAK6     | 861.4678621 | 827.51602   | 428.1830923 |             |
| 716.9356248 |          |             |             |             |             |
| PAK1        | PAK1     | 2936.490814 | 2172.66972  | 1722.767911 |             |
| 1549.60094  |          |             |             |             |             |
| CBX5        | CBX5     | 9032.391574 | 15339.85814 | 7135.269812 |             |
| 9224.048634 |          |             |             |             |             |
| UBAP2L      | UBAP2L   | 15403.29538 | 14022.87519 | 13467.69633 |             |
| 14084.69563 |          |             |             |             |             |
| ZNF566      | ZNF566   | 278.1280764 | 309.8783394 | 919.9246124 |             |
| 584.5330128 |          |             |             |             |             |
| SMIM8       | SMIM8    | 523.9641289 | 537.0050768 | 587.6366918 |             |
| 708.108784  |          |             |             |             |             |
| ZDHHC19     | ZDHHC19  | 0           | 0           | 14.49578177 | 0           |
| MAGEA8      | MAGEA8   | 1.041678189 | 5.282017149 | 0           | 0           |
| ARMC10      | ARMC10   | 2689.613083 | 2109.285515 | 2970.520203 |             |
| 3228.662212 |          |             |             |             |             |
| LATS2       | LATS2    | 32.29202385 | 116.2043773 | 57.98312709 |             |
| 18.63444168 |          |             |             |             |             |
| BCAR1       | BCAR1    | 6.250069132 | 21.12806859 | 0           | 60.8071255  |
| DHX34       | DHX34    | 1818.770117 | 1312.581261 | 2118.614259 |             |
| 1805.579323 |          |             |             |             |             |
| OR3A1       | OR3A1    | 29.16698928 | 36.09378385 | 20.07108245 |             |
| 35.30736319 |          |             |             |             |             |
| OPHN1       | OPHN1    | 4.166712755 | 0           | 0           | 9.807600887 |
| AMPD1       | AMPD1    | 0           | 0           | 5.575300681 | 0           |
| AP4S1       | AP4S1    | 330.2119858 | 359.1771661 | 532.9987451 |             |
| 519.802847  |          |             |             |             |             |
| ZNF883      | ZNF883   | 2.083356377 | 7.923025723 | 31.22168382 |             |
| 49.03800443 |          |             |             |             |             |

|             |             |             |             |             |             |
|-------------|-------------|-------------|-------------|-------------|-------------|
| MATN4       | MATN4       | 64.5840477  | 46.65781815 | 22.30120273 |             |
| 8.826840798 |             |             |             |             |             |
| MPDZ        | MPDZ        | 0           | 0.880336191 | 0           | 7.846080709 |
| HSD17B10    | HSD17B10    |             | 8056.339111 |             | 5771.484071 |
| 5304.341068 | 5035.222295 |             |             |             |             |
| SNORD81     | SNORD81     | 93.75103698 | 56.34151625 | 123.7716751 |             |
| 96.11448869 |             |             |             |             |             |
| LINC00634   | LINC00634   |             | 2.083356377 | 7.923025723 | 0           |
| 0.980760089 |             |             |             |             |             |
| LINC00304   | LINC00304   |             | 1.041678189 | 0           | 0           |
| 0.980760089 |             |             |             |             |             |
| RPL13AP20   | RPL13AP20   |             | 3.125034566 | 3.521344766 |             |
| 1.115060136 | 2.942280266 |             |             |             |             |
| SLC17A8     | SLC17A8     | 0           | 0           | 1.115060136 | 0           |
| RAF1        | RAF1        | 10248.03002 | 8268.11751  | 9170.254561 |             |
| 7901.984034 |             |             |             |             |             |
| PMF1-BGLAP  | PMF1-BGLAP  |             | 3530.247382 | 3076.774989 |             |
| 2837.828047 | 3410.102828 |             |             |             |             |
| LETM2       | LETM2       | 611.4650968 | 507.9539825 | 240.8529894 |             |
| 459.9764816 |             |             |             |             |             |
| CCER2       | CCER2       | 1.041678189 | 8.803361914 | 4.460240545 |             |
| 7.846080709 |             |             |             |             |             |
| LRRC63      | LRRC63      | 55.208944   | 52.82017149 | 28.99156354 |             |
| 67.67244612 |             |             |             |             |             |
| RANBP6      | RANBP6      | 2175.024058 | 2209.643841 | 2425.255796 |             |
| 2763.78193  |             |             |             |             |             |
| LAMC3       | LAMC3       | 9.375103698 | 7.042689532 | 5.575300681 |             |
| 9.807600887 |             |             |             |             |             |
| MTHFR       | MTHFR       | 355.2122623 | 724.5166856 | 964.5270179 |             |
| 656.1284993 |             |             |             |             |             |
| MTHFD1      | MTHFD1      | 25758.61825 | 18939.55282 | 13291.51682 |             |
| 15479.33648 |             |             |             |             |             |
| CACNA1C-AS1 | CACNA1C-AS1 |             | 5.208390943 | 23.76907717 |             |
| 44.60240545 | 86.3068878  |             |             |             |             |
| NABP1       | NABP1       | 1104.17888  | 2008.927189 | 1829.813684 |             |
| 2600.975755 |             |             |             |             |             |
| DIP2A-IT1   | DIP2A-IT1   |             | 9.375103698 | 10.5640343  |             |
| 16.72590204 | 5.884560532 |             |             |             |             |
| MTUS2-AS1   | MTUS2-AS1   |             | 0           | 0           | 6.690360818 |
| 4.903800443 |             |             |             |             |             |
| CRB1        | CRB1        | 3.125034566 | 4.401680957 | 20.07108245 |             |
| 7.846080709 |             |             |             |             |             |
| DHRS4L2     | DHRS4L2     | 546.8810491 | 774.6958485 | 444.9089944 |             |
| 796.377192  |             |             |             |             |             |
| STK35       | STK35       | 1471.891281 | 2505.436801 | 1766.255256 |             |
| 1834.021366 |             |             |             |             |             |
| HAUS4       | HAUS4       | 2739.613636 | 3091.740704 | 2127.53474  |             |
| 2574.495233 |             |             |             |             |             |
| TPP1        | TPP1        | 7842.795083 | 8207.374313 | 11441.63206 |             |
| 11033.551   |             |             |             |             |             |

|              |              |             |             |             |
|--------------|--------------|-------------|-------------|-------------|
| CUX1         | CUX1         | 597.9232803 | 1064.326455 | 845.2155833 |
| 1126.893342  |              |             |             |             |
| COMMD9       | COMMD9       | 2385.443052 | 1817.894235 | 1915.673314 |
| 2146.883834  |              |             |             |             |
| CCDC59       | CCDC59       | 1475.016315 | 1548.511361 | 1979.231742 |
| 1522.139658  |              |             |             |             |
| RAB6C        | RAB6C        | 2.083356377 | 0           | 2.942280266 |
| BC02         | BC02         | 16.66685102 | 20.2477324  | 18.95602232 |
| 36.28812328  |              |             |             |             |
| PPIAL4G      | PPIAL4G      | 0           | 0.880336191 | 1.115060136 |
| SMC02        | SMC02        | 10.41678189 | 1.760672383 | 7.805420954 |
| 2.942280266  |              |             |             |             |
| SLC15A5      | SLC15A5      | 0           | 0           | 1.115060136 |
| AARSD1       | AARSD1       | 2534.403033 | 1640.066325 | 2388.458812 |
| 2016.442742  |              |             |             |             |
| PTGES3L      | PTGES3L      | 36.4587366  | 31.69210289 | 17.84096218 |
| 26.48052239  |              |             |             |             |
| ACSS1        | ACSS1        | 4507.341522 | 3784.565287 | 3608.334601 |
| 3577.812803  |              |             |             |             |
| EPB41L2      | EPB41L2      | 2555.236597 | 4111.170014 | 2002.648005 |
| 2326.36293   |              |             |             |             |
| PAFAH1B1     | PAFAH1B1     |             | 4234.421837 | 5068.97579  |
| 3203.567771  | 3223.758411  |             |             |             |
| KPNA5        | KPNA5        | 208.3356377 | 173.4262297 | 1000.208942 |
| 458.9957215  |              |             |             |             |
| PARD3        | PARD3        | 36.4587366  | 269.3828746 | 40.14216491 |
| 177.517576   |              |             |             |             |
| TCF24        | TCF24        | 4.166712755 | 0           | 0           |
| ALDH8A1      | ALDH8A1      | 16.66685102 | 56.34151625 | 25.64638313 |
| 17.6536816   |              |             |             |             |
| CDADC1       | CDADC1       | 641.6737642 | 500.9112929 | 607.7077743 |
| 522.7451273  |              |             |             |             |
| MICAL1       | MICAL1       | 2976.074585 | 4073.315558 | 1361.488426 |
| 2770.64725   |              |             |             |             |
| TEF          | TEF          | 118.7513135 | 191.0329535 | 287.6855152 |
| 122.5950111  |              |             |             |             |
| LMLN         | LMLN         | 359.3789751 | 195.4346345 | 367.969845  |
| 395.2463157  |              |             |             |             |
| ARRB1        | ARRB1        | 575.0063602 | 749.1660989 | 374.6602058 |
| 571.7831317  |              |             |             |             |
| TBC1D8       | TBC1D8       | 95.83439336 | 83.63193819 | 214.0915462 |
| 260.8821836  |              |             |             |             |
| EXOC1        | EXOC1        | 2758.363844 | 2345.215614 | 2551.257592 |
| 2903.049862  |              |             |             |             |
| SNORD116-23  | SNORD116-23  |             | 0           | 0           |
| SNORD116-22  | SNORD116-22  |             | 3.125034566 | 0           |
| 0.980760089  |              |             |             |             |
| SNORD116-21  | SNORD116-21  |             | 2.083356377 | 0.880336191 |
| 12.74988115  |              |             |             | 0           |
| LOC100289092 | LOC100289092 |             | 58.33397857 | 81.8712658  |

|                 |               |               |               |  |
|-----------------|---------------|---------------|---------------|--|
| 21.18614259     | 58.84560532   |               |               |  |
| EXTL3 EXTL3     | 822.9257691   | 1733.381961   | 1146.28182    |  |
| 1214.18099      |               |               |               |  |
| TUBB2B TUBB2B   | 10.41678189   | 8.803361914   | 22.30120273   |  |
| 22.55748204     |               |               |               |  |
| ARMC8 ARMC8     | 5065.681032   | 3666.600237   | 5518.432614   |  |
| 4380.074556     |               |               |               |  |
| LRTOMT LRTOMT   | 3320.870066   | 2898.947078   | 1950.240178   |  |
| 2250.844403     |               |               |               |  |
| SMYD3 SMYD3     | 750.0082959   | 667.2948331   | 689.1071642   |  |
| 919.9529632     |               |               |               |  |
| CDH15 CDH15     | 0 0           | 0 0.980760089 |               |  |
| AGTPBP1 AGTPBP1 | 2275.025164   | 2776.580348   | 1819.778142   |  |
| 2289.094047     |               |               |               |  |
| ATCAY ATCAY     | 0 1.760672383 | 0             | 0.980760089   |  |
| CLSTN2 CLSTN2   | 0 3.521344766 | 0             | 0             |  |
| METTL4 METTL4   | 1834.39529    | 1409.418242   | 2030.524508   |  |
| 1752.618278     |               |               |               |  |
| TSSC2 TSSC2     | 0 0           | 1.115060136   | 1.961520177   |  |
| TMPRSS7 TMPRSS7 | 0 3.521344766 | 10.03554123   | 2.942280266   |  |
| MTOR-AS1        | MTOR-AS1      | 37.50041479   | 127.6487478   |  |
| 33.45180409     | 54.92256497   |               |               |  |
| FAM86DP FAM86DP | 280.2114328   | 169.9048849   | 434.8734531   |  |
| 297.1703069     |               |               |               |  |
| LMAN2L LMAN2L   | 1232.305297   | 848.6440885   | 1349.222765   |  |
| 1050.394055     |               |               |               |  |
| FAM154B FAM154B | 11.45846008   | 7.042689532   | 53.52288654   |  |
| 11.76912106     |               |               |               |  |
| ESC02 ESC02     | 3644.831982   | 3587.36998    | 2130.87992    |  |
| 2283.209486     |               |               |               |  |
| KY KY           | 0 0           | 13.38072164   | 0             |  |
| FGD4 FGD4       | 7.291747321   | 6.16235334    | 0 14.71140133 |  |
| USP20 USP20     | 2886.490261   | 5247.684037   | 3228.099094   |  |
| 3421.871949     |               |               |               |  |
| MLLT11 MLLT11   | 402.0877808   | 419.9203633   | 266.4993726   |  |
| 351.1121117     |               |               |               |  |
| ERP29 ERP29     | 6377.153871   | 6715.204468   | 7153.110774   |  |
| 5627.601389     |               |               |               |  |
| PSMF1 PSMF1     | 8267.799784   | 6518.889498   | 7339.325817   |  |
| 7605.794488     |               |               |               |  |
| C4B_2 C4B_2     | 1.041678189   | 0 3.345180409 | 2.942280266   |  |
| GNAZ GNAZ       | 2.083356377   | 3.521344766   | 3.345180409   |  |
| 24.51900222     |               |               |               |  |
| PGGT1B PGGT1B   | 580.2147511   | 1524.742284   | 555.2999479   |  |
| 1750.656758     |               |               |               |  |
| B3GALT4 B3GALT4 | 0 28.17075813 | 0             | 25.49976231   |  |
| B3GALNT1        | B3GALNT1      | 1168.762928   | 189.2722812   |  |
| 321.1373192     | 101.9990492   |               |               |  |
| B4GALT2 B4GALT2 | 471.8802195   | 787.0205551   | 403.6517693   |  |
| 481.5532035     |               |               |               |  |

|             |             |             |             |             |             |
|-------------|-------------|-------------|-------------|-------------|-------------|
| MRPL40      | MRPL40      | 3456.28823  | 2916.553802 | 2758.658777 |             |
| 2923.645824 |             |             |             |             |             |
| GNRH2       | GNRH2       | 3.125034566 | 1.760672383 | 0           | 0.980760089 |
| KCNH7       | KCNH7       | 0           | 0           | 1.961520177 |             |
| GPATCH1     | GPATCH1     | 902.0933114 | 765.8924866 | 1122.865557 |             |
| 866.0111583 |             |             |             |             |             |
| NIPAL3      | NIPAL3      | 3927.126771 | 4015.213369 | 5356.748895 |             |
| 4736.090468 |             |             |             |             |             |
| PTPN18      | PTPN18      | 6479.238334 | 6361.309319 | 3607.219541 |             |
| 4403.612798 |             |             |             |             |             |
| LPAR4       | LPAR4       | 11.45846008 | 4.401680957 | 1.115060136 | 0           |
| GPR37       | GPR37       | 0           | 6.16235334  | 0           |             |
| MAFF        | MAFF        | 401.0461026 | 331.006408  | 470.5553775 |             |
| 440.3612798 |             |             |             |             |             |
| PCDHGC4     | PCDHGC4     | 4.166712755 | 4.401680957 | 33.45180409 |             |
| 10.78836098 |             |             |             |             |             |
| CMTR1       | CMTR1       | 4772.969461 | 5123.556634 | 6547.63312  |             |
| 4417.343439 |             |             |             |             |             |
| TPT1        | TPT1        | 20641.89499 | 21852.58528 | 26471.52763 |             |
| 20357.63716 |             |             |             |             |             |
| TUBGCP3     | TUBGCP3     | 5747.980245 | 5443.999008 | 3478.987625 |             |
| 4319.26743  |             |             |             |             |             |
| TCP11L2     | TCP11L2     | 115.6262789 | 144.3751354 | 286.570455  |             |
| 161.8254146 |             |             |             |             |             |
| LIMD2       | LIMD2       | 14767.87168 | 17401.6055  | 9256.114191 |             |
| 12274.21251 |             |             |             |             |             |
| THAP7       | THAP7       | 1686.476988 | 1126.830325 | 2032.754628 |             |
| 1755.560559 |             |             |             |             |             |
| HIRIP3      | HIRIP3      | 4009.419348 | 3097.903058 | 3018.467789 |             |
| 3059.971477 |             |             |             |             |             |
| ZNF605      | ZNF605      | 87.50096785 | 206.879005  | 56.86806695 |             |
| 255.9783831 |             |             |             |             |             |
| AMT         | AMT         | 89.58432423 | 97.71731725 | 88.08975076 |             |
| 98.07600887 |             |             |             |             |             |
| PNMA5       | PNMA5       | 1.041678189 | 4.401680957 | 1.115060136 | 0           |
| PCYT2       | PCYT2       | 2453.152134 | 2299.438132 | 1925.708855 |             |
| 2415.612098 |             |             |             |             |             |
| DCHS2       | DCHS2       | 0           | 2.230120273 | 1.961520177 |             |
| ZNF260      | ZNF260      | 655.2155807 | 984.215862  | 1335.842043 |             |
| 1005.279091 |             |             |             |             |             |
| EIF2AK2     | EIF2AK2     | 7895.92067  | 4997.668559 | 12373.82233 |             |
| 5337.296403 |             |             |             |             |             |
| RASA4CP     | RASA4CP     | 160.4184411 | 266.741866  | 244.1981698 |             |
| 344.2467911 |             |             |             |             |             |
| GRAP2       | GRAP2       | 4396.923634 | 3029.236835 | 4318.627908 |             |
| 3028.587154 |             |             |             |             |             |
| NHS         | NHS         | 54.16726581 | 142.614463  | 108.1608332 |             |
| 331.49691   |             |             |             |             |             |
| C19orf71    | C19orf71    |             | 8.33342551  | 23.76907717 |             |
| 27.87650341 | 18.63444168 |             |             |             |             |

|                 |                 |             |               |
|-----------------|-----------------|-------------|---------------|
| C12orf73        | C12orf73        | 475.005254  | 593.346593    |
| 487.2812795     | 463.8995219     |             |               |
| HMGB2 HMGB2     | 60227.74951     | 53354.53555 | 31581.84824   |
| 35360.32424     |                 |             |               |
| UXT UXT         | 4053.169832     | 4495.87693  | 4468.045966   |
| 4275.133227     |                 |             |               |
| ZNF572 ZNF572   | 2.083356377     | 4.401680957 | 44.60240545   |
| 120.6334909     |                 |             |               |
| PACRG PACRG     | 1.041678189     | 3.521344766 | 12.2656615    |
| 6.865320621     |                 |             |               |
| AFAP1L1 AFAP1L1 | 4.166712755     | 14.08537906 | 51.29276627   |
| 13.73064124     |                 |             |               |
| DPM2 DPM2       | 3377.120688     | 2772.178667 | 3048.574413   |
| 3160.989766     |                 |             |               |
| ADAM17 ADAM17   | 2004.188835     | 1772.99709  | 2130.87992    |
| 1800.675523     |                 |             |               |
| ESR2 ESR2       | 17.70852921     | 25.52974955 | 56.86806695   |
| 33.34584301     |                 |             |               |
| DLG2 DLG2       | 19.79188559     | 19.36739621 | 23.41626286   |
| 14.71140133     |                 |             |               |
| CD53 CD53       | 27518.01271     | 27743.79507 | 17500.86884   |
| 19532.81793     |                 |             |               |
| MRPS16 MRPS16   | 7464.6659       | 8090.289599 | 7040.4897     |
| 7859.811351     |                 |             |               |
| DNAJC13 DNAJC13 | 1410.432268     | 2810.913459 | 1991.497403   |
| 2083.134428     |                 |             |               |
| SLC9A8 SLC9A8   | 1058.34504      | 1093.37755  | 993.5185814   |
| 1121.989541     |                 |             |               |
| KIR3DL2 KIR3DL2 | 2.083356377     | 194.5542983 | 12.2656615    |
| 185.3636568     |                 |             |               |
| DNAJB2 DNAJB2   | 57.29230038     | 282.5879175 | 168.3740806   |
| 92.19144833     |                 |             |               |
| HOXA2 HOXA2     | 0 0.880336191 0 |             | 1.961520177   |
| HIVEP2 HIVEP2   | 800.0088489     | 3079.415998 | 2689.525049   |
| 2366.574094     |                 |             |               |
| CENPI CENPI     | 830.2175164     | 971.0108192 | 431.5282727   |
| 641.417098      |                 |             |               |
| NCAPD3 NCAPD3   | 11189.7071      | 12589.68787 | 6931.213807   |
| 8513.97833      |                 |             |               |
| PRRC2A PRRC2A   | 2.083356377     | 5.282017149 | 0 1.961520177 |
| TNP03 TNP03     | 11089.706       | 8219.699019 | 8571.467267   |
| 9327.028443     |                 |             |               |
| CDRT4 CDRT4     | 217.7107414     | 323.9637184 | 269.844553    |
| 204.9788585     |                 |             |               |
| LYSMD2 LYSMD2   | 1223.971872     | 1460.477742 | 3492.368347   |
| 2329.305211     |                 |             |               |
| SEC14L1 SEC14L1 | 5358.392603     | 5966.918706 | 3053.034653   |
| 3465.025393     |                 |             |               |
| VSIG10L VSIG10L | 78.12586415     | 43.13647338 | 69.13372845   |
| 89.24916807     |                 |             |               |

|              |              |             |             |             |
|--------------|--------------|-------------|-------------|-------------|
| LOC100128164 | LOC100128164 | 13.54181645 | 7.042689532 | 0           |
| 0            |              |             |             |             |
| PLEKHA4      | PLEKHA4      | 66.66740408 | 66.02521436 | 113.7361339 |
| 152.9985738  |              |             |             |             |
| ASAH2        | ASAH2        | 26.04195472 | 14.96571525 | 20.07108245 |
| 28.44204257  |              |             |             |             |
| FAM136A      | FAM136A      | 7776.127679 | 5088.343187 | 5380.165157 |
| 5713.908277  |              |             |             |             |
| DCAF4        | DCAF4        | 641.6737642 | 408.4759928 | 669.0360818 |
| 552.1679299  |              |             |             |             |
| MTHFD2       | MTHFD2       | 10615.74242 | 11241.01283 | 11374.72845 |
| 9874.292573  |              |             |             |             |
| FAM122A      | FAM122A      | 1838.562003 | 1278.24815  | 1609.031777 |
| 1226.930871  |              |             |             |             |
| VSIG2        | VSIG2        | 0           | 16.72638764 | 5.575300681 |
|              |              |             |             | 7.846080709 |
| RNF125       | RNF125       | 2335.442499 | 2755.452279 | 3051.919593 |
| 2220.440841  |              |             |             |             |
| NAP1L4       | NAP1L4       | 24561.73001 | 22083.23336 | 17898.94531 |
| 19112.07185  |              |             |             |             |
| URI1         | URI1         | 1741.685932 | 2646.290591 | 3089.831638 |
| 2642.167679  |              |             |             |             |
| ZNF638       | ZNF638       | 5268.808278 | 5134.120668 | 5253.048302 |
| 5642.31279   |              |             |             |             |
| VCAM1        | VCAM1        | 170.8352229 | 4.401680957 | 52.4078264  |
| 4.903800443  |              |             |             |             |
| CTDSP1       | CTDSP1       | 972.9274282 | 1708.732548 | 520.7330836 |
| 532.5527281  |              |             |             |             |
| PBX1         | PBX1         | 0           | 0           | 3.345180409 |
|              |              |             |             | 1.961520177 |
| NPHP1        | NPHP1        | 15.62517283 | 15.84605145 | 30.10662368 |
| 34.3266031   |              |             |             |             |
| GABPB1       | GABPB1       | 5958.399239 | 5440.477663 | 4221.617676 |
| 5779.619203  |              |             |             |             |
| POLR3E       | POLR3E       | 3655.248764 | 2859.33195  | 2766.464198 |
| 3117.836322  |              |             |             |             |
| IDH3A        | IDH3A        | 13395.98151 | 8652.824426 | 9084.39493  |
| 9295.64412   |              |             |             |             |
| POLL         | POLL         | 772.925216  | 753.5677799 | 640.0445182 |
| 807.165553   |              |             |             |             |
| SLC03A1      | SLC03A1      | 3187.535257 | 2165.627031 | 1874.416089 |
| 1134.739423  |              |             |             |             |
| AHCYL1       | AHCYL1       | 5183.390667 | 6424.693525 | 5483.86575  |
| 5874.752931  |              |             |             |             |
| CPSF6        | CPSF6        | 13031.39414 | 11014.76643 | 9988.708701 |
| 10450.9795   |              |             |             |             |
| SCRIB        | SCRIB        | 278.1280764 | 1348.675045 | 398.0764686 |
| 473.7071228  |              |             |             |             |
| TMEM35       | TMEM35       | 0           | 0.880336191 | 0           |
|              |              |             |             | 0           |
| KLF6         | KLF6         | 9009.474654 | 6194.925779 | 22185.23647 |
| 16201.1759   |              |             |             |             |
| LRRC41       | LRRC41       | 6545.905738 | 5312.828915 | 5726.94886  |



|                 |                 |             |             |  |
|-----------------|-----------------|-------------|-------------|--|
| 5913.002575     |                 |             |             |  |
| MB21D1 MB21D1   | 2794.82258      | 3213.227099 | 1836.504044 |  |
| 1949.751056     |                 |             |             |  |
| FLYWCH2 FLYWCH2 | 784.3836761     | 711.3116427 | 779.4270352 |  |
| 796.377192      |                 |             |             |  |
| NIT1 NIT1       | 2720.863429     | 2749.289926 | 2476.548563 |  |
| 2787.320172     |                 |             |             |  |
| EHD4 EHD4       | 3312.53664      | 4527.569033 | 2916.997316 |  |
| 3574.870523     |                 |             |             |  |
| TRIM27 TRIM27   | 1.041678189     | 0 0         | 0.980760089 |  |
| RELB RELB       | 4041.711372     | 5151.727392 | 6203.079538 |  |
| 6121.904473     |                 |             |             |  |
| PLCH1 PLCH1     | 17.70852921     | 37.85445623 | 7.805420954 |  |
| 32.36508293     |                 |             |             |  |
| RAD54L2 RAD54L2 | 3134.40967      | 4472.107853 | 3234.789455 |  |
| 3417.948909     |                 |             |             |  |
| MDM1 MDM1       | 1713.56062      | 1997.482818 | 1390.47999  |  |
| 1375.025644     |                 |             |             |  |
| RTF1 RTF1       | 1885.437522     | 2647.170928 | 1528.747447 |  |
| 1762.425879     |                 |             |             |  |
| TP53I3 TP53I3   | 332.2953422     | 235.0497631 | 385.8108071 |  |
| 207.9211388     |                 |             |             |  |
| FYN FYN         | 14820.99727     | 13886.42308 | 20427.9017  |  |
| 26540.34876     |                 |             |             |  |
| FAM92B FAM92B   | 0 0             | 3.345180409 | 0           |  |
| EVA1A EVA1A     | 2.083356377     | 18.48706002 | 15.61084191 |  |
| 11.76912106     |                 |             |             |  |
| DUSP12 DUSP12   | 2251.066566     | 1648.869687 | 2310.404602 |  |
| 1736.926117     |                 |             |             |  |
| RAB10 RAB10     | 15403.29538     | 11439.08847 | 14586.10164 |  |
| 14098.42627     |                 |             |             |  |
| DCTN3 DCTN3     | 4201.088135     | 3656.036203 | 2425.255796 |  |
| 2322.43989      |                 |             |             |  |
| MAP1B MAP1B     | 32.29202385     | 53.70050768 | 28.99156354 |  |
| 44.13420399     |                 |             |             |  |
| SH3BP5-AS1      | SH3BP5-AS1      | 4142.754156 | 4449.219112 |  |
| 1606.801656     | 1892.866971     |             |             |  |
| VSX1 VSX1       | 4.166712755     | 1.760672383 | 10.03554123 |  |
| 2.942280266     |                 |             |             |  |
| BIN2 BIN2       | 13418.89843     | 10165.242   | 6457.313249 |  |
| 7409.64247      |                 |             |             |  |
| ZBP1 ZBP1       | 597.9232803     | 287.8699346 | 1263.363134 |  |
| 271.6705446     |                 |             |             |  |
| MINOS1 MINOS1   | 6071.942162     | 5609.502212 | 5835.109693 |  |
| 5384.372887     |                 |             |             |  |
| LRRC36 LRRC36   | 0 2.641008574 0 |             | 1.961520177 |  |
| VWDE VWDE       | 87.50096785     | 3.521344766 | 126.0017954 |  |
| 6.865320621     |                 |             |             |  |
| CMTM6 CMTM6     | 26668.00331     | 14617.98246 | 19021.81086 |  |
| 14939.91843     |                 |             |             |  |

|             |         |             |             |             |
|-------------|---------|-------------|-------------|-------------|
| MANSC1      | MANSC1  | 26.04195472 | 42.25613719 | 72.47890886 |
| 135.3448922 |         |             |             |             |
| USP18       | USP18   | 5950.065814 | 1736.903306 | 8578.157628 |
| 2189.056518 |         |             |             |             |
| NRDE2       | NRDE2   | 631.2569824 | 794.9435809 | 687.9921041 |
| 700.2627033 |         |             |             |             |
| DCAF11      | DCAF11  | 8058.422468 | 7287.422993 | 9094.430471 |
| 7642.082611 |         |             |             |             |
| PCDH1       | PCDH1   | 0           | 0           | 35.68192436 |
| TK2         | TK2     | 429.1714137 | 604.7909635 | 5.884560532 |
| 234.4016612 |         |             |             | 147.187938  |
| TRMU        | TRMU    | 2448.985422 | 1806.449865 | 1913.443194 |
| 2145.903074 |         |             |             |             |
| ABHD12B     | ABHD12B | 1.041678189 | 0           | 0           |
| TSC22D1     | TSC22D1 | 50.00055306 | 174.3065659 | 0           |
| 330.5161499 |         |             |             | 572.0258499 |
| PTBP3       | PTBP3   | 7103.203569 | 10654.70893 | 6384.83434  |
| 5949.290698 |         |             |             |             |
| ZC3H18      | ZC3H18  | 2505.236044 | 3770.479908 | 2078.472094 |
| 2466.611623 |         |             |             |             |
| GTSF1       | GTSF1   | 616.6734877 | 441.9287681 | 574.2559702 |
| 401.1308763 |         |             |             |             |
| RHEBL1      | RHEBL1  | 1004.177774 | 904.9856048 | 643.3896986 |
| 567.8600913 |         |             |             |             |
| PRDX5       | PRDX5   | 7502.166315 | 6323.454863 | 5819.498851 |
| 5850.233929 |         |             |             |             |
| DTWD1       | DTWD1   | 692.7159955 | 574.859533  | 822.9143806 |
| 697.320423  |         |             |             |             |
| ZNF41       | ZNF41   | 863.5512184 | 810.7896323 | 1412.781193 |
| 1115.124221 |         |             |             |             |
| PCDHGA8     | PCDHGA8 | 5.208390943 | 4.401680957 | 43.48734531 |
| 10.78836098 |         |             |             |             |
| PBXIP1      | PBXIP1  | 6310.486467 | 5991.568119 | 4984.318809 |
| 5851.214689 |         |             |             |             |
| STAT5A      | STAT5A  | 11812.63066 | 9431.041619 | 19843.61019 |
| 18902.18919 |         |             |             |             |
| ATG3        | ATG3    | 7444.874015 | 5716.903227 | 7313.679434 |
| 5479.506615 |         |             |             |             |
| GBP5        | GBP5    | 27609.68039 | 20837.55765 | 95174.84287 |
| 50320.83863 |         |             |             |             |
| TAOK2       | TAOK2   | 722.924663  | 1708.732548 | 896.5083496 |
| 940.548925  |         |             |             |             |
| LCOR        | LCOR    | 618.7568441 | 713.0723151 | 1187.539045 |
| 887.5878802 |         |             |             |             |
| ZNF493      | ZNF493  | 266.6696163 | 209.5200136 | 714.7535473 |
| 466.8418022 |         |             |             |             |
| TLE2        | TLE2    | 17.70852921 | 48.41849053 | 239.7379293 |
| 279.5166253 |         |             |             |             |
| GTF2A1L     | GTF2A1L | 0           | 0           | 3.923040355 |
| KLHL5       | KLHL5   | 3133.367992 | 4112.930686 | 2047.25041  |

|             |           |             |             |             |             |
|-------------|-----------|-------------|-------------|-------------|-------------|
| 2544.09167  |           |             |             |             |             |
| DCTN4       | DCTN4     | 1813.561727 | 1653.271368 | 2286.988339 |             |
| 1922.289774 |           |             |             |             |             |
| SNORD18C    | SNORD18C  |             | 26.04195472 | 13.20504287 |             |
| 57.98312709 |           | 57.86484523 |             |             |             |
| TIE1        | TIE1      | 25.00027653 | 14.08537906 | 35.68192436 |             |
| 24.51900222 |           |             |             |             |             |
| CLDN15      | CLDN15    | 60.41733494 | 137.3324459 | 134.9222765 |             |
| 106.9028497 |           |             |             |             |             |
| LINC00544   | LINC00544 |             | 6.250069132 | 51.0594991  | 0           |
| 1.961520177 |           |             |             |             |             |
| RICTOR      | RICTOR    | 1127.0958   | 2382.189734 | 2448.672059 |             |
| 2161.595235 |           |             |             |             |             |
| ACOT7       | ACOT7     | 9335.519927 | 7118.398444 | 5046.762177 |             |
| 5576.601864 |           |             |             |             |             |
| PPP5D1      | PPP5D1    | 28.12531109 | 23.76907717 | 66.90360818 |             |
| 25.49976231 |           |             |             |             |             |
| STXBP4      | STXBP4    | 402.0877808 | 353.895149  | 198.4807043 |             |
| 319.7277889 |           |             |             |             |             |
| IRF2BP2     | IRF2BP2   | 1759.394461 | 1915.611553 | 2033.869689 |             |
| 2045.865545 |           |             |             |             |             |
| NEDD9       | NEDD9     | 5347.975821 | 4390.236587 | 4335.35381  |             |
| 4645.86054  |           |             |             |             |             |
| RBPJL       | RBPJL     | 40.62544936 | 29.93143051 | 22.30120273 |             |
| 15.69216142 |           |             |             |             |             |
| CRELD1      | CRELD1    | 634.3820169 | 596.8679378 | 1064.88243  |             |
| 928.779804  |           |             |             |             |             |
| CALN1       | CALN1     | 0           | 5.282017149 | 0           | 1.961520177 |
| DDA1        | DDA1      | 1987.521984 | 1964.910379 | 1557.73901  |             |
| 1392.679326 |           |             |             |             |             |
| HSDL1       | HSDL1     | 1343.764863 | 1353.957062 | 1388.24987  |             |
| 1380.910205 |           |             |             |             |             |
| GHRL        | GHRL      | 59.37565676 | 98.59765344 | 36.7969845  |             |
| 52.96104479 |           |             |             |             |             |
| DYSF        | DYSF      | 6.250069132 | 0.880336191 | 41.25722504 |             |
| 8.826840798 |           |             |             |             |             |
| RGPD2       | RGPD2     | 6.250069132 | 13.20504287 | 20.07108245 |             |
| 47.07648426 |           |             |             |             |             |
| UBTF        | UBTF      | 6367.778768 | 7390.422327 | 7096.242707 |             |
| 6377.882857 |           |             |             |             |             |
| LACC1       | LACC1     | 538.5476236 | 456.0141472 | 648.9649993 |             |
| 594.3406137 |           |             |             |             |             |
| ZMAT4       | ZMAT4     | 0           | 0           | 6.690360818 | 0           |
| THAP9       | THAP9     | 195.8354995 | 152.2981611 | 249.7734705 |             |
| 235.3824213 |           |             |             |             |             |
| ALDH1A3     | ALDH1A3   | 3.125034566 | 0           | 1.115060136 | 0           |
| MRPL10      | MRPL10    | 4372.965036 | 3473.806611 | 3762.2129   |             |
| 3257.104254 |           |             |             |             |             |
| SETSIP      | SETSIP    | 0           | 1.760672383 | 0           | 0           |
| AQP9        | AQP9      | 3.125034566 | 0           | 25.64638313 | 6.865320621 |

|             |           |             |             |             |
|-------------|-----------|-------------|-------------|-------------|
| GAN         | GAN       | 683.3408918 | 527.3213787 | 547.4945269 |
| 521.7643672 |           |             |             |             |
| KCNC1       | KCNC1     | 0           | 2.641008574 | 0           |
| CLECL1      | CLECL1    | 161.4601192 | 483.3045691 | 90.31987104 |
| 283.4396656 |           |             |             |             |
| TNFRSF11A   | TNFRSF11A |             | 2375.02627  | 728.0380303 |
| 948.916176  |           | 339.3429907 |             |             |
| NUDT3       | NUDT3     | 1743.769288 | 2026.533913 | 1738.378752 |
| 1955.635617 |           |             |             |             |
| PNPLA6      | PNPLA6    | 866.676253  | 2436.770578 | 801.728238  |
| 1114.143461 |           |             |             |             |
| TRAFD1      | TRAFD1    | 10236.57156 | 8544.543074 | 19078.67893 |
| 12447.80705 |           |             |             |             |
| ARPP19      | ARPP19    | 13138.68699 | 12741.1057  | 11402.60495 |
| 11126.72321 |           |             |             |             |
| ZBTB6       | ZBTB6     | 370.8374352 | 497.3899482 | 648.9649993 |
| 675.7437011 |           |             |             |             |
| CD207       | CD207     | 0           | 0           | 3.345180409 |
| TOR1B       | TOR1B     | 256.2528344 | 1677.040445 | 231.9325083 |
| 1964.462458 |           |             |             |             |
| BRF1        | BRF1      | 1040.636511 | 1489.528836 | 962.2968976 |
| 1141.604743 |           |             |             |             |
| GAS6-AS1    | GAS6-AS1  |             | 15.62517283 | 27.29042193 |
| 11.15060136 |           | 48.05724434 |             |             |
| HMG3-AS1    | HMG3-AS1  |             | 841.6759765 | 747.4054265 |
| 579.8312709 |           | 610.0327752 |             |             |
| KCTD12      | KCTD12    | 26.04195472 | 87.15328295 | 80.28432981 |
| 73.55700665 |           |             |             |             |
| IL1RN       | IL1RN     | 566.6729347 | 58.10218863 | 888.7029286 |
| 412.8999973 |           |             |             |             |
| RBM11       | RBM11     | 27.08363291 | 49.29882672 | 299.9511767 |
| 138.2871725 |           |             |             |             |
| RGS13       | RGS13     | 6.250069132 | 2.641008574 | 3.345180409 |
| 1.961520177 |           |             |             |             |
| PTPN6       | PTPN6     | 13441.81535 | 12396.01391 | 15308.66061 |
| 18030.29347 |           |             |             |             |
| TBCCD1      | TBCCD1    | 2686.488049 | 2290.63477  | 2676.144327 |
| 2436.20806  |           |             |             |             |
| MSANTD2     | MSANTD2   | 315.6284912 | 278.1862365 | 289.9156354 |
| 441.3420399 |           |             |             |             |
| PIK3IP1     | PIK3IP1   | 2823.98957  | 1722.817927 | 16769.38939 |
| 8185.4237   |           |             |             |             |
| IL17F       | IL17F     | 6.250069132 | 2188.515772 | 6855.389718 |
| 7390.027268 |           |             |             |             |
| NIPSNAP3B   | NIPSNAP3B |             | 13.54181645 | 22.00840479 |
| 70.24878858 |           | 31.38432284 |             |             |
| OPA1        | OPA1      | 9602.189543 | 9479.460109 | 6810.787312 |
| 8321.749352 |           |             |             |             |
| NME8        | NME8      | 0           | 0           | 6.690360818 |
| LPXN        | LPXN      | 19378.33934 | 12222.58768 | 14665.27091 |

|             |           |             |             |             |             |
|-------------|-----------|-------------|-------------|-------------|-------------|
| 14145.50276 |           |             |             |             |             |
| OTX2        | OTX2      | 0           | 0           | 0           | 2.942280266 |
| NDUFB9      | NDUFB9    | 8618.845333 |             | 8071.802539 | 5890.8627   |
| 5983.617301 |           |             |             |             |             |
| CPQ         | CPQ       | 243.7526962 |             | 252.6564869 | 334.5180409 |
| 555.1102102 |           |             |             |             |             |
| INSIG2      | INSIG2    | 2857.323272 |             | 2783.623037 | 2762.003958 |
| 3371.853185 |           |             |             |             |             |
| TRAF3       | TRAF3     | 4662.551573 |             | 4583.030213 | 3055.264773 |
| 3570.947483 |           |             |             |             |             |
| LRR31       | LRR31     | 10.41678189 |             | 0           | 0           |
| ZBTB9       | ZBTB9     | 81.25089872 |             | 64.26454197 | 119.3114346 |
| 85.32612771 |           |             |             |             |             |
| PEX11G      | PEX11G    | 61.45901313 |             | 80.11059342 | 57.98312709 |
| 88.26840798 |           |             |             |             |             |
| EVC         | EVC       | 43.75048393 |             | 170.7852211 | 59.09818722 |
| 97.09524878 |           |             |             |             |             |
| CLPSL2      | CLPSL2    | 0           | 0.880336191 | 0           | 0           |
| ST7-OT3     | ST7-OT3   | 525.0058071 |             | 282.5879175 | 441.563814  |
| 310.9009481 |           |             |             |             |             |
| TANK        | TANK      | 14610.57827 |             | 10565.79497 | 12560.03737 |
| 10915.85979 |           |             |             |             |             |
| MCU         | MCU       | 2428.151858 |             | 1898.885165 | 1363.718547 |
| 1716.330155 |           |             |             |             |             |
| EPHB6       | EPHB6     | 214.5857069 |             | 527.3213787 | 739.2848703 |
| 829.723035  |           |             |             |             |             |
| ARRDC2      | ARRDC2    | 3050.033737 |             | 2865.494303 | 3042.999112 |
| 3262.008055 |           |             |             |             |             |
| HIST1H2BM   | HIST1H2BM |             |             | 22.91692015 | 149.6571525 |
| 11.15060136 |           | 14.71140133 |             |             |             |
| YARS        | YARS      | 18675.20657 |             | 14323.06983 | 16123.76957 |
| 15455.79824 |           |             |             |             |             |
| MAP4        | MAP4      | 5899.023583 |             | 6490.718739 | 6218.69038  |
| 6800.590455 |           |             |             |             |             |
| ZNF692      | ZNF692    | 1248.972148 |             | 1099.539903 | 894.2782293 |
| 1395.621606 |           |             |             |             |             |
| OR51E1      | OR51E1    | 0           | 0.880336191 | 0           | 0           |
| APOBEC3D    | APOBEC3D  |             |             | 2342.734246 | 1442.871018 |
| 1042.581227 |           | 1176.912106 |             |             |             |
| C9orf41     | C9orf41   | 1700.018804 |             | 2002.764836 | 1514.251665 |
| 1650.619229 |           |             |             |             |             |
| MROH2B      | MROH2B    | 0           | 0           | 1.115060136 | 2.942280266 |
| C4orf33     | C4orf33   | 877.0930349 |             | 688.4229017 | 576.4860904 |
| 524.7066474 |           |             |             |             |             |
| TSHZ2       | TSHZ2     | 190.6271085 |             | 420.8006995 | 238.6228692 |
| 707.1280239 |           |             |             |             |             |
| PML         | PML       | 4307.33931  |             | 5120.915626 | 5121.471206 |
| 3864.194749 |           |             |             |             |             |
| HLA-C       | HLA-C     | 84050.92969 |             | 25982.24235 | 119892.3809 |
| 39536.40069 |           |             |             |             |             |

|              |              |             |             |             |
|--------------|--------------|-------------|-------------|-------------|
| UBXN10       | UBXN10       | 114.5846008 | 126.7684116 | 34.56686422 |
| 92.19144833  |              |             |             |             |
| L3MBTL4      | L3MBTL4      | 25.00027653 | 2.641008574 | 2.230120273 |
| 19.61520177  |              |             |             |             |
| MTIF2        | MTIF2        | 2885.448583 | 1996.602482 | 2813.296724 |
| 2307.728489  |              |             |             |             |
| PTPN20B      | PTPN20B      | 1.041678189 | 0           | 6.690360818 |
|              |              |             |             | 15.69216142 |
| ELF3         | ELF3         | 3.125034566 | 0           | 0           |
|              |              |             |             | 6.865320621 |
| ELAVL2       | ELAVL2       | 0           | 0.880336191 | 0           |
|              |              |             |             | 0           |
| EPHA2        | EPHA2        | 0           | 0           | 7.846080709 |
|              |              |             |             |             |
| KDM5B        | KDM5B        | 7624.042663 | 5412.306905 | 4200.431533 |
| 3568.985963  |              |             |             |             |
| CARS2        | CARS2        | 4212.546595 | 3715.018728 | 2659.418425 |
| 3281.623257  |              |             |             |             |
| PLEKHS1      | PLEKHS1      | 2.083356377 | 0           | 14.49578177 |
|              |              |             |             | 1.961520177 |
| NFXL1        | NFXL1        | 735.4248012 | 725.3970217 | 1105.024595 |
| 670.8399006  |              |             |             |             |
| MIR567       | MIR567       | 1.041678189 | 0           | 0           |
|              |              |             |             | 0           |
| BDNF-AS      | BDNF-AS      | 18.7502074  | 7.042689532 | 28.99156354 |
| 27.46128248  |              |             |             |             |
| LOC338963    | LOC338963    |             | 0           | 0           |
|              |              |             |             | 0           |
| DYX1C1-CCPG1 | DYX1C1-CCPG1 |             | 2219.81622  | 1733.381961 |
| 2304.829302  | 1884.04013   |             |             |             |
| UBE2E3       | UBE2E3       | 2710.446647 | 3914.855043 | 2421.910616 |
| 2930.511145  |              |             |             |             |
| HMGNA4       | HMGNA4       | 5072.972779 | 4327.732717 | 7249.005946 |
| 6117.981433  |              |             |             |             |
| ZBTB18       | ZBTB18       | 13.54181645 | 53.70050768 | 178.4096218 |
| 90.22992816  |              |             |             |             |
| ZNHIT1       | ZNHIT1       | 2863.573341 | 3126.073816 | 1768.485376 |
| 2095.884309  |              |             |             |             |
| CXCL9        | CXCL9        | 52.08390943 | 13.20504287 | 154.9933589 |
| 90.22992816  |              |             |             |             |
| MIF          | MIF          | 22045.03551 | 28547.54202 | 20592.9306  |
| 30216.23757  |              |             |             |             |
| MGMT         | MGMT         | 939.5937262 | 1520.340603 | 874.2071468 |
| 1618.254146  |              |             |             |             |
| CIT          | CIT          | 1036.469798 | 3237.876512 | 586.5216317 |
| 882.6840798  |              |             |             |             |
| MAL          | MAL          | 4834.428474 | 4238.818762 | 6079.307863 |
| 3537.60164   |              |             |             |             |
| MAGOH        | MAGOH        | 3191.70197  | 3376.089294 | 2927.032858 |
| 2776.531811  |              |             |             |             |
| MAD2L1       | MAD2L1       | 11601.16999 | 10421.41983 | 7908.006486 |
| 8066.751729  |              |             |             |             |
| LCTL         | LCTL         | 1017.71959  | 745.6447541 | 617.7433155 |
| 661.0322998  |              |             |             |             |
| GRIN2C       | GRIN2C       | 1.041678189 | 1.760672383 | 18.95602232 |
| 2.942280266  |              |             |             |             |
| TBCEL        | TBCEL        | 702.0910992 | 751.8071075 | 530.7686249 |

|             |          |             |             |             |             |
|-------------|----------|-------------|-------------|-------------|-------------|
| 566.8793313 |          |             |             |             |             |
| JDP2        | JDP2     | 15.62517283 | 29.05109432 | 17.84096218 |             |
| 28.44204257 |          |             |             |             |             |
| FOX04       | FOX04    | 96.87607155 | 159.3408507 | 94.78011158 |             |
| 135.3448922 |          |             |             |             |             |
| STOX1       | STOX1    | 102.0844625 | 257.0581679 | 147.187938  |             |
| 294.2280266 |          |             |             |             |             |
| PCGF3       | PCGF3    | 922.9268752 | 1603.972541 | 1086.068573 |             |
| 1033.721133 |          |             |             |             |             |
| NCOR2       | NCOR2    | 1110.428949 | 1756.270702 | 1402.745651 |             |
| 1294.603317 |          |             |             |             |             |
| CCDC27      | CCDC27   | 0           | 1.760672383 | 2.230120273 | 6.865320621 |
| SAMD11      | SAMD11   | 1548.975467 | 930.5153543 | 1196.459526 |             |
| 1143.566263 |          |             |             |             |             |
| MSH2        | MSH2     | 8406.342983 | 7614.908056 | 5534.043456 |             |
| 7380.219667 |          |             |             |             |             |
| GPR97       | GPR97    | 1.041678189 | 2.641008574 | 0           | 2.942280266 |
| NUB1        | NUB1     | 2828.156282 | 2297.67746  | 6438.357227 |             |
| 4216.287621 |          |             |             |             |             |
| LIFR-AS1    | LIFR-AS1 | 0           | 0           | 0           | 2.942280266 |
| MIR6506     | MIR6506  | 45.8338403  | 62.50386959 | 70.24878858 |             |
| 34.3266031  |          |             |             |             |             |
| MIR6505     | MIR6505  | 0           | 0.880336191 | 0           | 0.980760089 |
| MY016       | MY016    | 9.375103698 | 9.683698106 | 14.49578177 |             |
| 18.63444168 |          |             |             |             |             |
| CPA5        | CPA5     | 10.41678189 | 5.282017149 | 28.99156354 |             |
| 1.961520177 |          |             |             |             |             |
| CSNK1D      | CSNK1D   | 7416.748704 | 7275.098286 | 6853.159597 |             |
| 7707.793537 |          |             |             |             |             |
| SFT2D1      | SFT2D1   | 5814.647649 | 3362.884251 | 3718.725554 |             |
| 3257.104254 |          |             |             |             |             |
| GPR152      | GPR152   | 5.208390943 | 14.96571525 | 6.690360818 |             |
| 9.807600887 |          |             |             |             |             |
| FAM214B     | FAM214B  | 1109.387271 | 955.1647677 | 640.0445182 |             |
| 679.6667414 |          |             |             |             |             |
| TRIM4       | TRIM4    | 2107.314976 | 1824.056589 | 3462.261723 |             |
| 2324.40141  |          |             |             |             |             |
| SPPL2A      | SPPL2A   | 10624.07585 | 9253.213708 | 6561.013842 |             |
| 6651.514921 |          |             |             |             |             |
| NR1I2       | NR1I2    | 0           | 6.16235334  | 13.38072164 | 26.48052239 |
| TNFSF11     | TNFSF11  | 395.8377117 | 112.6830325 | 94.78011158 |             |
| 102.9798093 |          |             |             |             |             |
| SP100       | SP100    | 15071.00003 | 11402.99469 | 19255.97349 |             |
| 12278.13555 |          |             |             |             |             |
| METTL17     | METTL17  | 4359.42322  | 3740.548477 | 3357.44607  |             |
| 3972.078359 |          |             |             |             |             |
| PRAME       | PRAME    | 0           | 1.760672383 | 16.72590204 | 0.980760089 |
| CACNA1C     | CACNA1C  | 10.41678189 | 59.86286102 | 92.54999131 |             |
| 119.6527308 |          |             |             |             |             |
| PLGLB1      | PLGLB1   | 53.12558762 | 33.45277527 | 53.52288654 |             |

|              |              |             |             |             |             |
|--------------|--------------|-------------|-------------|-------------|-------------|
| 63.74940576  |              |             |             |             |             |
| CADM1        | CADM1        | 47.91719668 | 48.41849053 | 122.656615  |             |
| 36.28812328  |              |             |             |             |             |
| FERMT2       | FERMT2       | 34.37538023 | 9.683698106 | 109.2758934 |             |
| 30.40356275  |              |             |             |             |             |
| LOC102723769 | LOC102723769 |             | 14.58349464 | 0.880336191 |             |
| 14.49578177  | 7.846080709  |             |             |             |             |
| SEC24C       | SEC24C       | 15356.41986 | 15683.18925 | 14956.30161 |             |
| 16055.04265  |              |             |             |             |             |
| CTSS         | CTSS         | 4300.047563 | 3453.558879 | 5608.752485 |             |
| 3295.353898  |              |             |             |             |             |
| PSTPIP1      | PSTPIP1      | 4633.384583 | 6488.077731 | 2022.719087 |             |
| 5358.873124  |              |             |             |             |             |
| SLC30A8      | SLC30A8      | 9.375103698 | 88.03361914 | 0           | 101.0182891 |
| KLF8         | KLF8         | 143.75159   | 60.74319721 | 37.91204463 |             |
| 80.42232727  |              |             |             |             |             |
| SETD6        | SETD6        | 914.5934497 | 857.4474505 | 933.3053341 |             |
| 977.8178084  |              |             |             |             |             |
| STEAP1B      | STEAP1B      | 19.79188559 | 8.803361914 | 0           | 1.961520177 |
| ASL          | ASL          | 2236.483071 | 1944.662647 | 1141.82158  |             |
| 1679.061272  |              |             |             |             |             |
| SRBD1        | SRBD1        | 2023.980721 | 1572.280438 | 1778.520917 |             |
| 1609.427306  |              |             |             |             |             |
| MIR374B      | MIR374B      | 11.45846008 | 12.32470668 | 2.230120273 |             |
| 11.76912106  |              |             |             |             |             |
| PAQR3        | PAQR3        | 1735.435862 | 1694.647169 | 1200.919767 |             |
| 1248.507593  |              |             |             |             |             |
| CLDND1       | CLDND1       | 40474.40602 | 25373.04971 | 20813.7125  |             |
| 19053.22624  |              |             |             |             |             |
| WBP1L        | WBP1L        | 1547.933788 | 2339.053261 | 1837.619105 |             |
| 1869.328729  |              |             |             |             |             |
| GRIA2        | GRIA2        | 0           | 0           | 1.115060136 | 0           |
| RCAN3        | RCAN3        | 3994.835854 | 2655.97429  | 4423.443561 |             |
| 3102.14416   |              |             |             |             |             |
| ATF6B        | ATF6B        | 76.04250777 | 0           | 79.16926967 | 0           |
| GTF2IRD1     | GTF2IRD1     |             | 12.50013826 | 19.36739621 |             |
| 53.52288654  | 36.28812328  |             |             |             |             |
| SEMA6C       | SEMA6C       | 34.37538023 | 26.41008574 | 60.21324736 |             |
| 46.09572417  |              |             |             |             |             |
| ACE          | ACE          | 5.208390943 | 112.6830325 | 36.7969845  |             |
| 104.9413295  |              |             |             |             |             |
| RELA         | RELA         | 3698.999248 | 4495.87693  | 5335.562752 |             |
| 4490.900446  |              |             |             |             |             |
| PDE2A        | PDE2A        | 43.75048393 | 62.50386959 | 132.6921562 |             |
| 119.6527308  |              |             |             |             |             |
| BLK          | BLK          | 0           | 15.84605145 | 6.690360818 | 43.1534439  |
| BHMT         | BHMT         | 2.083356377 | 8.803361914 | 0           | 3.923040355 |
| CEACAM1      | CEACAM1      | 3976.085646 | 478.022552  | 1692.661287 |             |
| 594.3406137  |              |             |             |             |             |
| CFB          | CFB          | 0           | 1.760672383 | 0           | 0           |



|                   |               |               |               |
|-------------------|---------------|---------------|---------------|
| C9orf117          | C9orf117      | 259.377869    | 201.5969878   |
| 279.8800942       | 237.3439415   |               |               |
| LRRIQ4 LRRIQ4     | 4.166712755   | 0 13.38072164 | 5.884560532   |
| INPP4A INPP4A     | 7164.662582   | 6842.853216   | 5169.418792   |
| 4292.786908       |               |               |               |
| UTS2B UTS2B       | 0 7.923025723 | 0             | 6.865320621   |
| CHMP2A CHMP2A     | 8627.178759   | 7503.985696   | 5567.49526    |
| 6331.787132       |               |               |               |
| TEX14 TEX14       | 47.91719668   | 91.55496391   | 75.82408927   |
| 16.67292151       |               |               |               |
| SMIM22 SMIM22     | 0 1.760672383 | 0             | 1.961520177   |
| ANKRD46 ANKRD46   | 571.8813256   | 539.6460854   | 1074.917971   |
| 951.337286        |               |               |               |
| CELA3B CELA3B     | 0 0           | 1.115060136   | 0             |
| COL11A1 COL11A1   | 0 0.880336191 | 0             | 1.961520177   |
| CDC42 CDC42       | 13038.68589   | 17556.54467   | 11269.9128    |
| 9447.661934       |               |               |               |
| DMD DMD           | 482.2970014   | 382.0659071   | 519.6180235   |
| 335.4199503       |               |               |               |
| UCHL3 UCHL3       | 3490.66361    | 2168.26804    | 2341.626286   |
| 2314.593809       |               |               |               |
| BTN2A2 BTN2A2     | 1107.303915   | 1178.77016    | 1020.280025   |
| 909.1646022       |               |               |               |
| VSNL1 VSNL1       | 1.041678189   | 7.042689532   | 0 0           |
| TNNT1 TNNT1       | 2.083356377   | 4.401680957   | 0 0           |
| SNORD86 SNORD86   | 697.9243864   | 453.3731386   | 667.9210216   |
| 662.0130599       |               |               |               |
| SNORD82 SNORD82   | 3.125034566   | 0 4.460240545 | 6.865320621   |
| TRAF3IP1 TRAF3IP1 |               | 567.7146128   | 410.2366652   |
| 501.7770613       | 594.3406137   |               |               |
| PTGES2 PTGES2     | 3735.457985   | 2701.751772   | 2957.139481   |
| 3246.315893       |               |               |               |
| FBX038 FBX038     | 3913.584955   | 4018.734714   | 3936.162281   |
| 4129.980733       |               |               |               |
| LAP3 LAP3         | 20266.89084   | 10256.79697   | 16628.89181   |
| 9927.253617       |               |               |               |
| RBAK RBAK         | 854.1761147   | 1074.010154   | 1382.674569   |
| 1184.758187       |               |               |               |
| RFPL2 RFPL2       | 1.041678189   | 3.521344766   | 0 5.884560532 |
| BATF BATF         | 9750.107846   | 7172.098952   | 7737.402286   |
| 9864.484972       |               |               |               |
| UBD UBD           | 44.79216211   | 0.880336191   | 40.14216491   |
| 4.903800443       |               |               |               |
| GUCA1B GUCA1B     | 7.291747321   | 23.76907717   | 11.15060136   |
| 4.903800443       |               |               |               |
| HAL HAL           | 1.041678189   | 2.641008574   | 1.115060136   |
| 4.903800443       |               |               |               |
| DAP3 DAP3         | 8555.302964   | 6325.215535   | 6548.74818    |
| 7222.317293       |               |               |               |
| SPAG6 SPAG6       | 91.66768061   | 88.03361914   | 16.72590204   |

|             |             |             |             |             |             |
|-------------|-------------|-------------|-------------|-------------|-------------|
| 60.8071255  |             |             |             |             |             |
| TNFRSF18    | TNFRSF18    |             | 4941.721327 | 3834.74445  |             |
| 3658.512307 | 7165.433208 |             |             |             |             |
| USP2        | USP2        | 2.083356377 | 6.16235334  | 32.33674395 |             |
| 13.73064124 |             |             |             |             |             |
| RORC        | RORC        | 333.3370204 | 1184.052177 | 334.5180409 |             |
| 1734.964597 |             |             |             |             |             |
| AQR         | AQR         | 5290.68352  | 5587.493807 | 5053.452538 |             |
| 5323.565761 |             |             |             |             |             |
| PROK2       | PROK2       | 175.0019357 | 271.143547  | 51.29276627 |             |
| 30.40356275 |             |             |             |             |             |
| APH1A       | APH1A       | 3257.327696 | 3701.813685 | 2729.667214 |             |
| 2699.051764 |             |             |             |             |             |
| GGTA1P      | GGTA1P      | 0           | 9.683698106 | 0           | 0           |
| MPPE1       | MPPE1       | 1906.271085 | 1745.706668 | 1529.862507 |             |
| 1696.714953 |             |             |             |             |             |
| TAS2R10     | TAS2R10     | 0           | 0.880336191 | 0           | 0.980760089 |
| ECHDC2      | ECHDC2      | 611.4650968 | 843.3620714 | 483.9360991 |             |
| 841.4921561 |             |             |             |             |             |
| SERBP1      | SERBP1      | 20654.39513 | 17523.09189 | 18314.86274 |             |
| 20099.69726 |             |             |             |             |             |
| MAPKBP1     | MAPKBP1     | 808.3422744 | 1042.318051 | 877.5523272 |             |
| 965.0679272 |             |             |             |             |             |
| DNAJC7      | DNAJC7      | 3996.91921  | 3932.461767 | 4333.12369  |             |
| 3712.176936 |             |             |             |             |             |
| TSTA3       | TSTA3       | 6851.117447 | 3312.705088 | 3651.821946 |             |
| 4123.115413 |             |             |             |             |             |
| TPPP3       | TPPP3       | 0           | 0           | 1.961520177 |             |
| THAP4       | THAP4       | 2419.818432 | 2357.540321 | 1876.646209 |             |
| 2097.84583  |             |             |             |             |             |
| HDDC2       | HDDC2       | 3538.580807 | 2796.82808  | 3387.552694 |             |
| 3603.312566 |             |             |             |             |             |
| VAV1        | VAV1        | 2463.568916 | 3434.191483 | 1915.673314 |             |
| 3024.664113 |             |             |             |             |             |
| TRPV3       | TRPV3       | 1.041678189 | 18.48706002 | 3.345180409 |             |
| 6.865320621 |             |             |             |             |             |
| CSF1        | CSF1        | 11333.45869 | 3831.223105 | 13222.3831  |             |
| 10774.63033 |             |             |             |             |             |
| SPRY1       | SPRY1       | 535.422589  | 701.6279446 | 273.1897334 |             |
| 1049.413295 |             |             |             |             |             |
| CBX3P2      | CBX3P2      | 15.62517283 | 29.05109432 | 101.4704724 |             |
| 26.48052239 |             |             |             |             |             |
| LRR37A11P   | LRR37A11P   |             | 1.041678189 | 0           | 5.575300681 |
| 0           |             |             |             |             |             |
| KLF7        | KLF7        | 555.2144746 | 481.5438967 | 836.2951022 |             |
| 622.7826563 |             |             |             |             |             |
| FCHSD2      | FCHSD2      | 1488.558132 | 2007.166516 | 2528.956389 |             |
| 2180.229677 |             |             |             |             |             |
| ATP10B      | ATP10B      | 3.125034566 | 1.760672383 | 7.805420954 | 0           |
| RBPJ        | RBPJ        | 9262.602454 | 5446.640016 | 10849.53513 |             |

|             |          |             |               |               |
|-------------|----------|-------------|---------------|---------------|
| 12500.76809 |          |             |               |               |
| RSU1        | RSU1     | 9077.183736 | 6729.289847   | 7159.801135   |
| 7430.238432 |          |             |               |               |
| RLF         | RLF      | 1842.728716 | 2279.1904     | 2276.952798   |
| 2429.34274  |          |             |               |               |
| ABI2        | ABI2     | 1521.891834 | 2469.343017   | 1635.79322    |
| 1967.404738 |          |             |               |               |
| H2AFV       | H2AFV    | 13026.18575 | 15365.38789   | 9634.119577   |
| 9905.676896 |          |             |               |               |
| FBX011      | FBX011   | 1180.221388 | 2011.568197   | 1650.289002   |
| 1265.180514 |          |             |               |               |
| KIAA1033    | KIAA1033 |             | 6872.992689   | 6290.882424   |
| 6090.458464 |          | 5847.291649 |               |               |
| VAT1L       | VAT1L    | 2.083356377 | 0.880336191   | 2.230120273   |
| 9.807600887 |          |             |               |               |
| RFPL1       | RFPL1    | 10.41678189 | 0.880336191   | 0 3.923040355 |
| HNRNPM      | HNRNPM   | 37616.04107 | 28315.13326   | 25853.78432   |
| 28557.77226 |          |             |               |               |
| ANP32A      | ANP32A   | 5152.140321 | 5967.799042   | 2385.113631   |
| 2988.37599  |          |             |               |               |
| SAFB        | SAFB     | 11439.70987 | 8752.302415   | 10150.39242   |
| 10587.30516 |          |             |               |               |
| GFRA3       | GFRA3    | 4.166712755 | 13.20504287   | 0 5.884560532 |
| UBN1        | UBN1     | 2094.814837 | 2310.882503   | 3047.459352   |
| 2005.654381 |          |             |               |               |
| HP          | HP       | 4.166712755 | 0 1.115060136 | 0             |
| YTHDF2      | YTHDF2   | 15837.67518 | 11586.10462   | 14619.55345   |
| 13631.58447 |          |             |               |               |
| CDC20       | CDC20    | 18655.41468 | 13262.26472   | 8487.837757   |
| 10486.28687 |          |             |               |               |
| EIF3C       | EIF3C    | 2114.606723 | 1402.375553   | 1694.891407   |
| 1830.098325 |          |             |               |               |
| AP3S2       | AP3S2    | 2676.071267 | 1961.389035   | 2347.201587   |
| 2012.519702 |          |             |               |               |
| MSLN        | MSLN     | 1.041678189 | 0 0           | 0             |
| STX6        | STX6     | 3297.953145 | 2547.692938   | 2746.393116   |
| 2906.972903 |          |             |               |               |
| MTX3        | MTX3     | 1211.471733 | 1998.363155   | 1123.980617   |
| 1053.336335 |          |             |               |               |
| RRM1        | RRM1     | 34321.21296 | 25546.47594   | 16861.93938   |
| 20187.96567 |          |             |               |               |
| TGIF2       | TGIF2    | 3529.205703 | 3425.388121   | 4279.600803   |
| 4866.53156  |          |             |               |               |
| KLHL10      | KLHL10   | 5.208390943 | 9.683698106   | 2.230120273   |
| 4.903800443 |          |             |               |               |
| C17orf77    | C17orf77 |             | 1.041678189   | 0 1.115060136 |
| 0           |          |             |               |               |
| SVIL-AS1    | SVIL-AS1 |             | 972.9274282   | 638.2437388   |
| 694.6824649 |          | 712.0318244 |               |               |
| IN080C      | IN080C   | 884.3847822 | 838.0800542   | 669.0360818   |

|                 |              |             |             |             |   |
|-----------------|--------------|-------------|-------------|-------------|---|
| 637.4940576     |              |             |             |             |   |
| MIR155HG        | MIR155HG     | 1066.678465 |             | 792.3025723 |   |
| 3819.080967     | 3195.316369  |             |             |             |   |
| SNORD38B        | SNORD38B     | 10.41678189 |             | 2.641008574 |   |
| 22.30120273     | 9.807600887  |             |             |             |   |
| MAP3K7 MAP3K7   | 6700.07411   | 5337.478329 |             | 4615.233904 |   |
| 5585.428705     |              |             |             |             |   |
| DPY19L4 DPY19L4 | 476.0469322  | 746.5250903 |             | 893.1631691 |   |
| 845.4151964     |              |             |             |             |   |
| KDM6A KDM6A     | 3301.07818   | 2186.7551   |             | 5117.010965 |   |
| 2075.288348     |              |             |             |             |   |
| ASF1B ASF1B     | 11394.91771  | 10410.8558  |             | 5879.712099 |   |
| 6860.41682      |              |             |             |             |   |
| TJP3 TJP3       | 97.91774974  | 39.61512861 |             | 640.0445182 |   |
| 439.3805197     |              |             |             |             |   |
| RAB18 RAB18     | 7492.791211  | 4725.644676 |             | 6640.183111 |   |
| 5022.472414     |              |             |             |             |   |
| MAPK14 MAPK14   | 8762.596923  | 7695.898986 |             | 6198.619297 |   |
| 6654.457202     |              |             |             |             |   |
| ILDR1 ILDR1     | 85.41761147  | 125.8880754 |             | 2.230120273 |   |
| 39.23040355     |              |             |             |             |   |
| PGAP2 PGAP2     | 1877.104096  | 1448.153035 |             | 1545.473349 |   |
| 1510.370537     |              |             |             |             |   |
| HDAC7 HDAC7     | 2879.198514  | 8885.23318  |             | 2014.913666 |   |
| 4069.173608     |              |             |             |             |   |
| LOC100506207    | LOC100506207 | 9.375103698 |             | 13.20504287 |   |
| 45.71746559     | 19.61520177  |             |             |             |   |
| PPP1R26-AS1     | PPP1R26-AS1  | 13.54181645 |             | 22.88874098 | 0 |
| 2.942280266     |              |             |             |             |   |
| LOC100506136    | LOC100506136 | 18.7502074  |             | 14.96571525 |   |
| 24.531323       | 34.3266031   |             |             |             |   |
| LOC100506497    | LOC100506497 | 0           | 4.401680957 | 0           |   |
| 2.942280266     |              |             |             |             |   |
| DNM30S DNM30S   | 6.250069132  | 2.641008574 |             | 0           | 0 |
| MAGI2-AS3       | MAGI2-AS3    | 0           | 0           | 7.805420954 |   |
| 8.826840798     |              |             |             |             |   |
| LINC00936       | LINC00936    | 94.79271517 |             | 111.8026963 |   |
| 149.4180583     | 126.5180514  |             |             |             |   |
| SLC26A4-AS1     | SLC26A4-AS1  | 204.168925  |             | 39.61512861 |   |
| 60.21324736     | 60.8071255   |             |             |             |   |
| INS             | INS          | 0           | 0           | 3.345180409 | 0 |
| IGF2BP2 IGF2BP2 | 1.041678189  | 14.96571525 |             | 5.575300681 |   |
| 3.923040355     |              |             |             |             |   |
| AFF3 AFF3       | 27.08363291  | 110.0420239 |             | 112.6210738 |   |
| 329.5353898     |              |             |             |             |   |
| ZNF816 ZNF816   | 776.0502506  | 651.4487817 |             | 1515.366725 |   |
| 1240.661512     |              |             |             |             |   |
| TTLL9 TTLL9     | 0            | 0           | 2.230120273 | 0           |   |
| ATXN7L1 ATXN7L1 | 320.8368821  | 592.4662568 |             | 295.4909361 |   |
| 323.6508293     |              |             |             |             |   |

|             |          |             |   |             |             |
|-------------|----------|-------------|---|-------------|-------------|
| NALCN       | NALCN    | 0           | 0 | 0           | 1.961520177 |
| GPC2        | GPC2     | 14.58349464 |   | 57.22185244 | 95.89517172 |
| 42.17268381 |          |             |   |             |             |
| C15orf57    | C15orf57 |             |   | 2395.859834 | 1993.961474 |
| 2166.561845 |          | 1929.155094 |   |             |             |
| BEND6       | BEND6    | 2.083356377 |   | 25.52974955 | 4.460240545 |
| 10.78836098 |          |             |   |             |             |
| METTL6      | METTL6   | 1193.763204 |   | 895.3019067 | 934.4203942 |
| 1049.413295 |          |             |   |             |             |
| GLUL        | GLUL     | 5613.603759 |   | 7335.841483 | 4210.467075 |
| 8970.031771 |          |             |   |             |             |
| GP2         | GP2      | 0           | 0 | 0           | 1.961520177 |
| REP15       | REP15    | 2.083356377 |   | 10.5640343  | 0           |
| SOWAHB      | SOWAHB   | 0           | 0 | 15.61084191 | 0           |
| PRR25       | PRR25    | 3.125034566 |   | 3.521344766 | 1.115060136 |
| 0.980760089 |          |             |   |             |             |
| LIPM        | LIPM     | 1.041678189 |   | 0           | 0           |
| FOXP4       | FOXP4    | 121.8763481 |   | 308.9980032 | 343.438522  |
| 322.6700692 |          |             |   |             |             |
| PDE9A       | PDE9A    | 120.8346699 |   | 166.3835402 | 166.1439603 |
| 203.9980984 |          |             |   |             |             |
| ENAH        | ENAH     | 4.166712755 |   | 15.84605145 | 0           |
| GPSM3       | GPSM3    | 1.041678189 |   | 0           | 0           |
| ANGPT4      | ANGPT4   | 3.125034566 |   | 0.880336191 | 2.230120273 |
| 4.903800443 |          |             |   |             |             |
| ATRAID      | ATRAID   | 6950.076875 |   | 5753.877347 | 7580.178806 |
| 6248.422525 |          |             |   |             |             |
| BRCA1       | BRCA1    | 3919.835024 |   | 5709.860538 | 1897.832352 |
| 3509.159597 |          |             |   |             |             |
| UBE2D4      | UBE2D4   | 683.3408918 |   | 554.6118006 | 875.322207  |
| 810.1078332 |          |             |   |             |             |
| GCNT2       | GCNT2    | 107.2928534 |   | 48.41849053 | 109.2758934 |
| 87.28764789 |          |             |   |             |             |
| XPNPEP1     | XPNPEP1  | 5239.641289 |   | 4330.373726 | 3980.764686 |
| 5276.489277 |          |             |   |             |             |
| RBM4B       | RBM4B    | 1788.56145  |   | 1272.966133 | 1500.870943 |
| 1325.98764  |          |             |   |             |             |
| GBP4        | GBP4     | 13101.18658 |   | 8623.773331 | 33089.40954 |
| 15690.1999  |          |             |   |             |             |
| RASD2       | RASD2    | 0           | 0 | 17.84096218 | 0.980760089 |
| QPRT        | QPRT     | 547.9227273 |   | 368.8608642 | 182.8698623 |
| 173.5945357 |          |             |   |             |             |
| ETHE1       | ETHE1    | 2090.648125 |   | 2857.571277 | 1973.656441 |
| 2787.320172 |          |             |   |             |             |
| TRAM1       | TRAM1    | 14578.28625 |   | 13599.43349 | 18210.04709 |
| 13986.61962 |          |             |   |             |             |
| CBX6        | CBX6     | 928.1352661 |   | 2814.434804 | 1452.923358 |
| 1689.849633 |          |             |   |             |             |
| APTR        | APTR     | 820.8424127 |   | 853.9261057 | 792.8077569 |
| 822.8577144 |          |             |   |             |             |

|              |              |             |               |
|--------------|--------------|-------------|---------------|
| SPTY2D1-AS1  | SPTY2D1-AS1  | 934.3853353 | 1061.685447   |
| 540.8041661  | 422.7075982  |             |               |
| ZSWIM8-AS1   | ZSWIM8-AS1   | 275.0030418 | 816.0716495   |
| 388.0409274  | 427.6113987  |             |               |
| LOC100506314 | LOC100506314 | 37.50041479 | 42.25613719   |
| 21.18614259  | 90.22992816  |             |               |
| FAM153C      | FAM153C      | 1.041678189 | 7.805420954   |
| 12.74988115  |              |             |               |
| LOC100507156 | LOC100507156 | 8.33342551  | 8.803361914   |
| 8.92048109   | 14.71140133  |             |               |
| LOC100507634 | LOC100507634 | 13.54181645 | 27.29042193   |
| 21.18614259  | 21.57672195  |             |               |
| ITGB2-AS1    | ITGB2-AS1    | 134.3764863 | 344.2114509   |
| 89.2048109   | 148.0947734  |             |               |
| LINC00649    | LINC00649    | 751.0499741 | 937.5580439   |
| 1039.236047  | 851.299757   |             |               |
| WNT8B        | WNT8B        | 8.33342551  | 0 1.961520177 |
| CYP1B1       | CYP1B1       | 7852.170186 | 2048.36547    |
| 1936.020415  |              |             |               |
| COL7A1       | COL7A1       | 2.083356377 | 1.115060136   |
| 2.942280266  |              |             |               |
| PMS2         | PMS2         | 1141.679295 | 1477.204129   |
| 1529.985738  |              |             |               |
| HNF1A        | HNF1A        | 13.54181645 | 36.09378385   |
| 22.55748204  |              |             |               |
| CEP112       | CEP112       | 88.54264604 | 242.9727888   |
| 212.8249392  |              |             |               |
| CDK5RAP2     | CDK5RAP2     | 1970.855133 | 3037.15986    |
| 1839.849225  | 1789.887162  |             |               |
| PDSS1        | PDSS1        | 2230.233002 | 1390.050846   |
| 1201.431109  |              |             |               |
| HABP4        | HABP4        | 1312.514518 | 1495.691189   |
| 2233.190722  |              |             |               |
| ITGB1        | ITGB1        | 4937.554614 | 7995.213291   |
| 7922.579996  |              |             |               |
| TYMP         | TYMP         | 7638.626158 | 6895.673388   |
| 12148.67522  |              |             |               |
| NECAB3       | NECAB3       | 514.5890252 | 437.5270871   |
| 307.9586678  |              |             |               |
| C12orf57     | C12orf57     | 2094.814837 | 2611.077144   |
| 2407.414834  | 2355.785733  |             |               |
| CASC4        | CASC4        | 4040.669694 | 5169.334116   |
| 4283.960067  |              |             |               |
| ZNF273       | ZNF273       | 638.5487297 | 707.7902979   |
| 515.8798066  |              |             |               |
| TBC1D3F      | TBC1D3F      | 43.75048393 | 54.58084387   |
| 65.71092594  |              |             |               |
| THNSL1       | THNSL1       | 545.8393709 | 473.620871    |
| 1167.104506  |              |             |               |
| WDR11        | WDR11        | 4260.463792 | 4087.400937   |
|              |              |             | 2693.985289   |

|                 |               |             |             |  |
|-----------------|---------------|-------------|-------------|--|
| 3808.291424     |               |             |             |  |
| PLBD1 PLBD1     | 7.291747321   | 14.96571525 | 10.03554123 |  |
| 2.942280266     |               |             |             |  |
| ARFGAP1 ARFGAP1 | 1448.97436    | 2183.233755 | 1388.24987  |  |
| 1480.947734     |               |             |             |  |
| ZNF423 ZNF423   | 0 1.760672383 | 0           | 0.980760089 |  |
| GTF3C6 GTF3C6   | 10520.94971   | 7121.039453 | 6897.762003 |  |
| 6455.362904     |               |             |             |  |
| KCNK7 KCNK7     | 21.87524196   | 22.88874098 | 4.460240545 |  |
| 4.903800443     |               |             |             |  |
| TRIM47 TRIM47   | 1214.596768   | 1479.845138 | 545.2644066 |  |
| 1012.144412     |               |             |             |  |
| FCHSD1 FCHSD1   | 1141.679295   | 1454.315388 | 1232.141451 |  |
| 1480.947734     |               |             |             |  |
| IN080B IN080B   | 244.7943743   | 473.620871  | 393.6162281 |  |
| 413.8807574     |               |             |             |  |
| PCSK9 PCSK9     | 0 1.760672383 | 0           | 0.980760089 |  |
| FASTK FASTK     | 3581.289613   | 3075.014317 | 3040.768992 |  |
| 3202.18169      |               |             |             |  |
| OGN OGN         | 43.75048393   | 34.33311147 | 25.64638313 |  |
| 23.53824213     |               |             |             |  |
| SFMBT1 SFMBT1   | 2690.654761   | 2478.146379 | 2582.479276 |  |
| 2323.42065      |               |             |             |  |
| S100B S100B     | 0 0.880336191 | 49.062646   | 1.961520177 |  |
| RRAS RRAS       | 409.3795282   | 438.4074233 | 782.7722157 |  |
| 830.7037951     |               |             |             |  |
| RANBP2 RANBP2   | 3483.371863   | 7356.969552 | 4309.707427 |  |
| 4605.649376     |               |             |             |  |
| ITFG2 ITFG2     | 1437.5159     | 954.2844315 | 1931.284156 |  |
| 1542.735619     |               |             |             |  |
| KCNN4 KCNN4     | 5171.932207   | 4698.354254 | 3462.261723 |  |
| 7007.530834     |               |             |             |  |
| ARHGEF10        | ARHGEF10      | 40.62544936 | 354.7754851 |  |
| 73.59396899     | 160.8446545   |             |             |  |
| HMG20A HMG20A   | 3426.079563   | 2898.066742 | 3422.119558 |  |
| 3606.254846     |               |             |             |  |
| VAV3 VAV3       | 157.2934065   | 220.9643841 | 441.563814  |  |
| 572.7638918     |               |             |             |  |
| BRK1 BRK1       | 8588.636666   | 7808.582018 | 6428.321686 |  |
| 6515.189269     |               |             |             |  |
| THBS1 THBS1     | 132.29313     | 125.8880754 | 74.70902913 |  |
| 33.34584301     |               |             |             |  |
| SCP2 SCP2       | 6780.28333    | 5866.56038  | 4988.77905  |  |
| 5326.508042     |               |             |             |  |
| GNB2L1 GNB2L1   | 33738.91485   | 29162.01668 | 33118.40111 |  |
| 31006.7302      |               |             |             |  |
| RWDD1 RWDD1     | 2417.735076   | 2619.880506 | 2822.217205 |  |
| 2323.42065      |               |             |             |  |
| RRP15 RRP15     | 1012.511199   | 744.764418  | 1083.838452 |  |
| 993.5099698     |               |             |             |  |

|             |             |             |             |             |
|-------------|-------------|-------------|-------------|-------------|
| GET4        | GET4        | 5235.474576 | 3559.199222 | 3858.108071 |
| 3544.46696  |             |             |             |             |
| CCDC144A    | CCDC144A    | 12.50013826 |             | 56.34151625 |
| 13.38072164 | 62.76864567 |             |             |             |
| FAT4        | FAT4        | 0           | 0.880336191 | 1.115060136 |
| MUL1        | MUL1        | 3333.370204 | 2460.539655 | 2877.970212 |
| 2733.378367 |             |             |             |             |
| NEIL3       | NEIL3       | 3363.578871 | 2763.375305 | 1339.187224 |
| 1865.405689 |             |             |             |             |
| TMEM30A     | TMEM30A     | 10664.7013  | 7779.530924 | 11758.30914 |
| 8540.458852 |             |             |             |             |
| CCDC25      | CCDC25      | 3382.329079 | 3448.276862 | 2890.235873 |
| 3500.332756 |             |             |             |             |
| CLIC4       | CLIC4       | 1171.887962 | 1912.970544 | 1398.285411 |
| 1290.680277 |             |             |             |             |
| SPCS1       | SPCS1       | 8238.632794 | 8948.617386 | 8289.357053 |
| 7620.505889 |             |             |             |             |
| TNFRSF19    | TNFRSF19    | 138.5431991 |             | 367.1001918 |
| 44.60240545 | 50.99952461 |             |             |             |
| ZNF732      | ZNF732      | 0           | 2.641008574 | 2.230120273 |
| ANAPC5      | ANAPC5      | 22371.08078 | 15631.24942 | 14237.08782 |
| 15688.23838 |             |             |             |             |
| LRRFIP1     | LRRFIP1     | 18261.66033 | 15765.06052 | 13342.80959 |
| 14299.48209 |             |             |             |             |
| PPP2R5C     | PPP2R5C     | 12367.84513 | 12928.61731 | 13222.3831  |
| 10944.30183 |             |             |             |             |
| SH2B1       | SH2B1       | 31.25034566 | 250.0154784 | 64.6734879  |
| 67.67244612 |             |             |             |             |
| UBA7        | UBA7        | 3868.792793 | 3902.530337 | 3345.180409 |
| 4218.249141 |             |             |             |             |
| ZNF233      | ZNF233      | 45.8338403  | 17.60672383 | 56.86806695 |
| 21.57672195 |             |             |             |             |
| SPATA12     | SPATA12     | 0           | 0.880336191 | 0           |
| ST7         | ST7         | 1609.392802 | 923.4726648 | 1117.290257 |
| 933.6836044 |             |             |             |             |
| FLT1        | FLT1        | 302.0866747 | 1805.569529 | 390.2710477 |
| 1844.809727 |             |             |             |             |
| SLC4A11     | SLC4A11     | 120.8346699 | 80.11059342 | 7.805420954 |
| 58.84560532 |             |             |             |             |
| SPTB        | SPTB        | 12.50013826 | 49.29882672 | 40.14216491 |
| 29.42280266 |             |             |             |             |
| CSGALNACT2  | CSGALNACT2  | 5338.600717 |             | 4934.284353 |
| 3400.933416 | 3103.124921 |             |             |             |
| BID         | BID         | 1919.812902 | 1066.967464 | 1576.695033 |
| 1413.275288 |             |             |             |             |
| CLEC18C     | CLEC18C     | 1.041678189 | 0           | 7.805420954 |
| IN080E      | IN080E      | 228.1275233 | 551.970792  | 200.7108245 |
| 229.4978607 |             |             |             |             |
| PPP1R21     | PPP1R21     | 1341.681507 | 2061.74736  | 1649.173942 |
| 1404.448447 |             |             |             |             |



|             |             |             |             |             |
|-------------|-------------|-------------|-------------|-------------|
| TSPAN33     | TSPAN33     | 187.502074  | 211.2806859 | 315.5620186 |
| 324.6315893 |             |             |             |             |
| PDF         | PDF         | 1533.350294 | 1397.093536 | 1433.967335 |
| 1587.850584 |             |             |             |             |
| RAB38       | RAB38       | 463.546794  | 397.9119585 | 255.3487712 |
| 290.3049862 |             |             |             |             |
| TOMM6       | TOMM6       | 6506.321967 | 6069.037704 | 6747.228885 |
| 6061.097348 |             |             |             |             |
| HS2ST1      | HS2ST1      | 1179.17971  | 1487.768164 | 1325.806502 |
| 1271.065075 |             |             |             |             |
| SP3         | SP3         | 7145.912374 | 7188.825339 | 7728.481804 |
| 6531.862191 |             |             |             |             |
| PCBP3       | PCBP3       | 145.8349464 | 410.2366652 | 124.8867353 |
| 475.668643  |             |             |             |             |
| DMTN        | DMTN        | 100.0011061 | 288.7502708 | 165.0289002 |
| 269.7090244 |             |             |             |             |
| ATP13A2     | ATP13A2     | 4599.009203 | 4059.230179 | 3778.938802 |
| 4299.652229 |             |             |             |             |
| KRTAP16-1   | KRTAP16-1   |             | 7.291747321 | 4.401680957 |
| 12.2656615  | 4.903800443 |             |             |             |
| ZNF414      | ZNF414      | 327.0869513 | 486.8259139 | 218.5517867 |
| 366.8042732 |             |             |             |             |
| CPB2        | CPB2        | 2.083356377 | 7.923025723 | 2.230120273 |
| 4.903800443 |             |             |             |             |
| CARHSP1     | CARHSP1     | 3248.994271 | 5314.589588 | 1684.855866 |
| 2270.459605 |             |             |             |             |
| RASSF7      | RASSF7      | 1803.144945 | 1310.820589 | 1690.431167 |
| 1768.31044  |             |             |             |             |
| TMEM201     | TMEM201     | 693.7576737 | 1153.240411 | 661.2306608 |
| 560.9947707 |             |             |             |             |
| LOC401052   | LOC401052   |             | 13.54181645 | 22.00840479 |
| 6.690360818 | 7.846080709 |             |             |             |
| PSMD12      | PSMD12      | 8673.012599 | 6458.1463   | 8181.19622  |
| 8151.097097 |             |             |             |             |
| PDE5A       | PDE5A       | 211.4606723 | 256.1778317 | 274.3047935 |
| 306.9779078 |             |             |             |             |
| PSMD5       | PSMD5       | 6130.27614  | 4929.002336 | 4678.792332 |
| 5460.872174 |             |             |             |             |
| RFC1        | RFC1        | 3628.165131 | 4517.885334 | 4187.050812 |
| 3448.352472 |             |             |             |             |
| LOC113230   | LOC113230   |             | 47.91719668 | 52.82017149 |
| 39.02710477 | 65.71092594 |             |             |             |
| ZNF718      | ZNF718      | 637.5070515 | 505.3129739 | 961.1818375 |
| 627.6864567 |             |             |             |             |
| PIGS        | PIGS        | 4650.051434 | 4068.913877 | 3529.165331 |
| 3915.194274 |             |             |             |             |
| GIT1        | GIT1        | 6207.360326 | 5169.334116 | 5477.175389 |
| 6122.885234 |             |             |             |             |
| MBTD1       | MBTD1       | 303.1283529 | 492.9882672 | 520.7330836 |
| 412.8999973 |             |             |             |             |

|             |             |               |               |               |
|-------------|-------------|---------------|---------------|---------------|
| MACROD1     | MACROD1     | 111.4595662   | 131.1700925   | 256.4638313   |
| 378.5733942 |             |               |               |               |
| SLC6A15     | SLC6A15     | 3.125034566   | 14.96571525   | 0 0.980760089 |
| TMEM39B     | TMEM39B     | 171.8769011   | 464.8175091   | 175.0644414   |
| 169.6714953 |             |               |               |               |
| P2RX7       | P2RX7       | 340.6287677   | 564.2954987   | 943.3408753   |
| 502.1491654 |             |               |               |               |
| PSRC1       | PSRC1       | 585.423142    | 552.8511282   | 216.3216664   |
| 468.8033224 |             |               |               |               |
| ATRIP       | ATRIP       | 1536.475328   | 1486.007491   | 1498.640823   |
| 1499.582176 |             |               |               |               |
| RPUSD1      | RPUSD1      | 3430.246275   | 2079.354084   | 2226.775092   |
| 2294.978607 |             |               |               |               |
| FAM207A     | FAM207A     | 509.3806343   | 713.9526513   | 458.289716    |
| 438.3997596 |             |               |               |               |
| ELOVL1      | ELOVL1      | 5569.853275   | 4922.839983   | 5150.462769   |
| 4581.130374 |             |               |               |               |
| WARS2       | WARS2       | 1021.886303   | 862.7294676   | 713.6384872   |
| 1096.489779 |             |               |               |               |
| SUN3        | SUN3        | 0 0           | 0 0.980760089 |               |
| SAT2        | SAT2        | 634.3820169   | 627.6797045   | 989.0583409   |
| 727.7239858 |             |               |               |               |
| SLC26A10    | SLC26A10    |               | 5.208390943   | 16.72638764   |
| 4.460240545 | 12.74988115 |               |               |               |
| SLC4A5      | SLC4A5      | 648.9655116   | 667.2948331   | 809.5336589   |
| 637.4940576 |             |               |               |               |
| UBE2W       | UBE2W       | 1759.394461   | 1389.17051    | 1570.004672   |
| 1399.544647 |             |               |               |               |
| GAK         | GAK         | 7013.619245   | 7511.028385   | 5505.051893   |
| 6731.937249 |             |               |               |               |
| RGS20       | RGS20       | 3.125034566   | 12.32470668   | 17.84096218   |
| 3.923040355 |             |               |               |               |
| CMA1        | CMA1        | 2.083356377   | 1.760672383   | 43.48734531   |
| 12.74988115 |             |               |               |               |
| PPP1CB      | PPP1CB      | 12749.09935   | 17439.45995   | 13798.86919   |
| 13678.66096 |             |               |               |               |
| ITGAM       | ITGAM       | 1855.228854   | 808.1486237   | 75.82408927   |
| 286.3819459 |             |               |               |               |
| CRHR2       | CRHR2       | 2.083356377   | 4.401680957   | 6.690360818   |
| 1.961520177 |             |               |               |               |
| ZNF586      | ZNF586      | 760.4250777   | 773.8155123   | 1061.53725    |
| 756.1660284 |             |               |               |               |
| ATG2A       | ATG2A       | 166.6685102   | 566.9365073   | 297.7210564   |
| 243.228502  |             |               |               |               |
| LM01        | LM01        | 0 1.760672383 | 0             | 0.980760089   |
| LOXL2       | LOXL2       | 42.70880574   | 63.38420578   | 61.32830749   |
| 147.1140133 |             |               |               |               |
| GOLGA2      | GOLGA2      | 398.9627463   | 488.5865862   | 766.0463136   |
| 506.0722058 |             |               |               |               |
| MBIP        | MBIP        | 1363.556749   | 1103.941584   | 1345.877584   |

|               |              |  |               |             |             |
|---------------|--------------|--|---------------|-------------|-------------|
| 1332.852961   |              |  |               |             |             |
| SNAI3-AS1     | SNAI3-AS1    |  | 56.25062219   |             | 66.02521436 |
| 85.85963049   | 94.15296851  |  |               |             |             |
| ODC1 ODC1     | 17276.23276  |  | 12997.28353   |             | 19162.30844 |
| 16249.23315   |              |  |               |             |             |
| IL32 IL32     | 86840.54388  |  | 90554.02166   |             | 32084.74036 |
| 51476.17401   |              |  |               |             |             |
| CD28 CD28     | 17653.32026  |  | 21709.97082   |             | 9990.938821 |
| 21454.12694   |              |  |               |             |             |
| ETNPPL ETNPPL | 1.041678189  |  | 1.760672383   |             | 23.41626286 |
| 2.942280266   |              |  |               |             |             |
| RPRD1A RPRD1A | 1125.012444  |  | 1097.779231   |             | 971.2173787 |
| 1063.143936   |              |  |               |             |             |
| INTS10 INTS10 | 7356.331369  |  | 6705.52077    |             | 5685.691635 |
| 6501.458628   |              |  |               |             |             |
| YBX2 YBX2     | 1.041678189  |  | 10.5640343    | 0           | 0.980760089 |
| FBXL4 FBXL4   | 938.552048   |  | 876.8148467   |             | 1206.495067 |
| 1384.833245   |              |  |               |             |             |
| CBR1 CBR1     | 5966.732665  |  | 3848.829829   |             | 6044.740999 |
| 4922.434885   |              |  |               |             |             |
| RRAD RRAD     | 192.7104649  |  | 106.5206792   |             | 202.9409448 |
| 219.6902599   |              |  |               |             |             |
| GNL1 GNL1     | 0 0          |  | 2.230120273   | 0           |             |
| DPF2 DPF2     | 7713.626987  |  | 6262.711666   |             | 7050.525242 |
| 6935.935347   |              |  |               |             |             |
| MVP MVP       | 25995.0792   |  | 21903.64478   |             | 17206.49296 |
| 21762.08561   |              |  |               |             |             |
| GOLGA5 GOLGA5 | 3158.368268  |  | 2719.358495   |             | 4001.950829 |
| 2791.243212   |              |  |               |             |             |
| MY03B MY03B   | 12.50013826  |  | 29.93143051   | 0           | 2.942280266 |
| LIMS3 LIMS3   | 1.041678189  |  | 0 1.115060136 |             | 0.980760089 |
| GLT8D1 GLT8D1 | 2864.615019  |  | 2344.335278   |             | 3026.27321  |
| 3057.029196   |              |  |               |             |             |
| RPS20 RPS20   | 6588.614544  |  | 8747.900734   |             | 9859.361725 |
| 7393.950308   |              |  |               |             |             |
| POT1 POT1     | 2176.065736  |  | 1869.834071   |             | 2338.281106 |
| 2118.441792   |              |  |               |             |             |
| MMP24 MMP24   | 91.66768061  |  | 247.3744698   |             | 129.3469758 |
| 100.037529    |              |  |               |             |             |
| LOC102724050  | LOC102724050 |  | 53.12558762   |             | 44.89714576 |
| 151.6481785   | 106.9028497  |  |               |             |             |
| ETFDH ETFDH   | 4004.210957  |  | 2575.863696   |             | 2866.81961  |
| 2621.571717   |              |  |               |             |             |
| CD300C CD300C | 104.1678189  |  | 15.84605145   |             | 7.805420954 |
| 21.57672195   |              |  |               |             |             |
| RAB24 RAB24   | 1695.852091  |  | 1254.479073   |             | 995.7487017 |
| 980.7600887   |              |  |               |             |             |
| LAMA5-AS1     | LAMA5-AS1    |  | 3.125034566   | 0.880336191 | 0           |
| 0.980760089   |              |  |               |             |             |
| RBMS3-AS3     | RBMS3-AS3    |  | 1.041678189   | 0           | 0           |

|             |             |             |             |             |             |
|-------------|-------------|-------------|-------------|-------------|-------------|
| 1.961520177 |             |             |             |             |             |
| CLEC17A     | CLEC17A     | 7.291747321 | 12.32470668 | 0           | 21.57672195 |
| RPL18A      | RPL18A      | 14820.99727 | 16936.78799 |             | 17972.53928 |
| 18371.59798 |             |             |             |             |             |
| NIPSNAP1    | NIPSNAP1    |             | 2440.651996 |             | 2945.604897 |
| 2363.927489 | 3989.732041 |             |             |             |             |
| UBE2G2      | UBE2G2      | 8808.430764 | 6053.191652 |             | 8099.79683  |
| 7849.02299  |             |             |             |             |             |
| ARF5        | ARF5        | 5785.48066  | 5922.901896 |             | 4807.024247 |
| 5480.487375 |             |             |             |             |             |
| SAE1        | SAE1        | 22037.74376 | 17065.31707 |             | 12083.9067  |
| 15348.89539 |             |             |             |             |             |
| GGA3        | GGA3        | 2256.274957 | 3547.754851 |             | 3183.496689 |
| 2926.588105 |             |             |             |             |             |
| MYL5        | MYL5        | 101.0427843 | 102.9993344 |             | 102.5855325 |
| 116.7104506 |             |             |             |             |             |
| RABGAP1     | RABGAP1     | 2656.279381 | 3038.920533 |             | 2601.435298 |
| 2373.439415 |             |             |             |             |             |
| NUSAP1      | NUSAP1      | 15838.71686 | 15079.27862 |             | 8424.279329 |
| 10839.3605  |             |             |             |             |             |
| LIMA1       | LIMA1       | 5530.269504 | 3125.19348  |             | 3250.400297 |
| 3264.950335 |             |             |             |             |             |
| SLC04A1     | SLC04A1     | 6989.660646 | 4885.865862 |             | 1885.56669  |
| 3440.506391 |             |             |             |             |             |
| TMPRSS5     | TMPRSS5     | 3.125034566 | 12.32470668 | 0           | 3.923040355 |
| SMC4        | SMC4        | 11153.24837 | 12481.40652 |             | 5706.877777 |
| 7877.465032 |             |             |             |             |             |
| SPACA5B     | SPACA5B     | 0           | 1.115060136 | 0           |             |
| OLFM1       | OLFM1       | 52.08390943 | 10.5640343  |             | 6.690360818 |
| 3.923040355 |             |             |             |             |             |
| ACVR1C      | ACVR1C      | 22.91692015 | 29.05109432 |             | 161.6837198 |
| 34.3266031  |             |             |             |             |             |
| CXorf40A    | CXorf40A    |             | 1781.269703 |             | 1049.36074  |
| 1200.919767 | 1048.432535 |             |             |             |             |
| UPF2        | UPF2        | 1932.31304  | 2081.114757 |             | 2220.084731 |
| 1805.579323 |             |             |             |             |             |
| MIR3155A    | MIR3155A    |             | 3.125034566 |             | 0.880336191 |
| 7.805420954 | 2.942280266 |             |             |             |             |
| MIR3074     | MIR3074     | 0           | 1.760672383 | 1.115060136 | 0.980760089 |
| TPO         | TPO         | 32.29202385 | 29.93143051 | 0           | 3.923040355 |
| AZI2        | AZI2        | 2795.864258 | 2332.010571 |             | 3180.151509 |
| 2180.229677 |             |             |             |             |             |
| HS1BP3      | HS1BP3      | 638.5487297 | 904.1052686 |             | 686.8770439 |
| 654.1669791 |             |             |             |             |             |
| RFESD       | RFESD       | 296.8782838 | 303.715986  |             | 256.4638313 |
| 391.3232754 |             |             |             |             |             |
| SNURF       | SNURF       | 4613.592698 | 4796.071571 |             | 9075.474449 |
| 6869.243661 |             |             |             |             |             |
| UTP3        | UTP3        | 454.1716903 | 869.7721571 |             | 730.3643893 |
| 741.454627  |             |             |             |             |             |

|                 |             |             |             |             |
|-----------------|-------------|-------------|-------------|-------------|
| ADAMTS17        | ADAMTS17    | 8.33342551  | 27.29042193 |             |
| 28.99156354     | 58.84560532 |             |             |             |
| USHBP1 USHBP1   | 8.33342551  | 6.16235334  | 0           | 4.903800443 |
| TSNARE1 TSNARE1 | 233.3359143 | 198.0756431 | 379.1204463 |             |
| 410.9384772     |             |             |             |             |
| NSD1 NSD1       | 4053.169832 | 5308.427234 | 3093.176818 |             |
| 3424.81423      |             |             |             |             |
| TPK1 TPK1       | 1643.768182 | 1340.75202  | 1118.405317 |             |
| 1144.547023     |             |             |             |             |
| ORC5 ORC5       | 3083.367439 | 2248.378633 | 2401.839534 |             |
| 2351.862693     |             |             |             |             |
| TMEM117 TMEM117 | 80.20922053 | 94.19597248 | 130.4620359 |             |
| 173.5945357     |             |             |             |             |
| MIR600HG        | MIR600HG    | 7.291747321 | 2.641008574 |             |
| 20.07108245     | 24.51900222 |             |             |             |
| GRM1 GRM1       | 0 0         | 0           | 5.884560532 |             |
| POLM POLM       | 840.6342983 | 785.2598828 | 1306.85048  |             |
| 1322.0646       |             |             |             |             |
| NUTM1 NUTM1     | 1.041678189 | 0.880336191 | 0           | 0           |
| ANLN ANLN       | 4753.177575 | 5414.947914 | 2904.731655 |             |
| 3508.178837     |             |             |             |             |
| SUSD3 SUSD3     | 2396.901512 | 2314.403847 | 1691.546227 |             |
| 2220.440841     |             |             |             |             |
| ST6GALNAC6      | ST6GALNAC6  | 4434.424049 | 3536.310481 |             |
| 3075.335856     | 3887.732991 |             |             |             |
| RABGEF1 RABGEF1 | 2725.030142 | 2626.042859 | 3011.777428 |             |
| 2789.281692     |             |             |             |             |
| CBLL1 CBLL1     | 4414.632164 | 5003.830912 | 5500.591652 |             |
| 5281.393077     |             |             |             |             |
| SNORA45A        | SNORA45A    | 38.54209298 | 36.97412004 |             |
| 25.64638313     | 36.28812328 |             |             |             |
| TTC25 TTC25     | 26.04195472 | 7.923025723 | 26.76144327 |             |
| 19.61520177     |             |             |             |             |
| MRVI1-AS1       | MRVI1-AS1   | 2.083356377 | 2.641008574 | 0           |
| 2.942280266     |             |             |             |             |
| CBR3-AS1        | CBR3-AS1    | 936.4686916 | 692.8245827 |             |
| 619.9734358     | 595.3213738 |             |             |             |
| SNHG1 SNHG1     | 821.8840909 | 1065.206792 | 1188.654105 |             |
| 1044.509494     |             |             |             |             |
| LINC00963       | LINC00963   | 998.969383  | 1003.583258 |             |
| 1101.679415     | 1670.234431 |             |             |             |
| RTN4R RTN4R     | 102.0844625 | 80.11059342 | 74.70902913 |             |
| 152.0178137     |             |             |             |             |
| PAPOLG PAPOLG   | 2283.35859  | 2467.582345 | 3074.220796 |             |
| 2687.282643     |             |             |             |             |
| MRPS36 MRPS36   | 3041.700311 | 3275.730968 | 2463.167841 |             |
| 2283.209486     |             |             |             |             |
| DCLRE1C DCLRE1C | 2925.032354 | 2607.555799 | 2785.42022  |             |
| 2561.745352     |             |             |             |             |
| AJUBA AJUBA     | 15.62517283 | 58.98252483 | 60.21324736 |             |

|                 |                 |             |             |  |
|-----------------|-----------------|-------------|-------------|--|
| 63.74940576     |                 |             |             |  |
| THYN1 THYN1     | 4215.67163      | 4055.708834 | 3759.982779 |  |
| 3989.732041     |                 |             |             |  |
| NDUF4F4 NDUFAF4 | 2120.856792     | 1949.944664 | 2464.282901 |  |
| 2014.481222     |                 |             |             |  |
| UBE2R2 UBE2R2   | 2108.356654     | 3019.553137 | 1890.026931 |  |
| 2232.209962     |                 |             |             |  |
| H00K1 H00K1     | 158.3350847     | 201.5969878 | 773.8517346 |  |
| 761.0698288     |                 |             |             |  |
| CCDC183-AS1     | CCDC183-AS1     | 67.70908227 | 88.91395534 |  |
| 157.2234792     | 100.037529      |             |             |  |
| DCTN5 DCTN5     | 7439.665624     | 7272.457277 | 5026.691094 |  |
| 6466.151265     |                 |             |             |  |
| LRSAM1 LRSAM1   | 1173.971319     | 1152.360075 | 842.985463  |  |
| 1335.795241     |                 |             |             |  |
| ARL2-SNX15      | ARL2-SNX15      | 1844.812072 | 2420.924526 |  |
| 2152.066063     | 2470.534663     |             |             |  |
| PLAUR PLAUR     | 554.1727964     | 493.8686034 | 307.7565976 |  |
| 491.3608044     |                 |             |             |  |
| TMX2-CTNND1     | TMX2-CTNND1     | 1946.896535 | 1302.017227 |  |
| 2027.179328     | 1778.118041     |             |             |  |
| CCNH CCNH       | 4321.922805     | 3987.042611 | 3177.921388 |  |
| 3568.005203     |                 |             |             |  |
| DDX3X DDX3X     | 51003.68915     | 35557.65911 | 51126.62231 |  |
| 35952.70333     |                 |             |             |  |
| NDST3 NDST3     | 0 4.401680957 0 | 0           | 0           |  |
| 0AZ1 0AZ1       | 34375.38023     | 29072.22239 | 29280.36412 |  |
| 27328.87987     |                 |             |             |  |
| NGDN NGDN       | 4225.046733     | 2626.042859 | 5341.138053 |  |
| 3750.426579     |                 |             |             |  |
| CCND2 CCND2     | 93868.74662     | 59186.76282 | 57618.50242 |  |
| 33100.65299     |                 |             |             |  |
| B4GALT6 B4GALT6 | 13.54181645     | 60.74319721 | 14.49578177 |  |
| 26.48052239     |                 |             |             |  |
| ARL6IP4 ARL6IP4 | 7355.28969      | 7493.421662 | 4997.699531 |  |
| 6284.710648     |                 |             |             |  |
| CASC3 CASC3     | 6778.199974     | 7931.829085 | 9204.821425 |  |
| 7144.837246     |                 |             |             |  |
| RYR3 RYR3       | 66.66740408     | 39.61512861 | 22.30120273 |  |
| 36.28812328     |                 |             |             |  |
| RFC3 RFC3       | 5642.770748     | 5988.046774 | 4173.67009  |  |
| 4993.049611     |                 |             |             |  |
| NSF NSF         | 4555.258719     | 3465.883586 | 3425.464739 |  |
| 4063.289047     |                 |             |             |  |
| CDH17 CDH17     | 0 0             | 1.115060136 | 0           |  |
| ATP5A1 ATP5A1   | 59078.77847     | 44854.88963 | 38323.50182 |  |
| 42549.29569     |                 |             |             |  |
| SAMD4A SAMD4A   | 17.70852921     | 10.5640343  | 53.52288654 |  |
| 25.49976231     |                 |             |             |  |
| TEX10 TEX10     | 3239.619167     | 2957.929603 | 3046.344292 |  |

|             |          |             |             |             |             |
|-------------|----------|-------------|-------------|-------------|-------------|
| 3453.256272 |          |             |             |             |             |
| POC1A       | POC1A    | 3197.952039 | 2583.786722 | 1224.33603  |             |
| 1933.078135 |          |             |             |             |             |
| SGSM1       | SGSM1    | 26.04195472 | 35.21344766 | 5.575300681 |             |
| 51.9802847  |          |             |             |             |             |
| NAT10       | NAT10    | 10486.57433 | 8291.006251 | 10133.66652 |             |
| 10004.73366 |          |             |             |             |             |
| STAU2       | STAU2    | 2777.114051 | 2798.588753 | 1441.772756 |             |
| 2036.057944 |          |             |             |             |             |
| AGPAT9      | AGPAT9   | 3525.038991 | 1059.924774 | 971.2173787 |             |
| 850.3189969 |          |             |             |             |             |
| ARFGAP2     | ARFGAP2  | 8530.302687 | 5974.841731 | 7552.302303 |             |
| 7094.818481 |          |             |             |             |             |
| CACNA1E     | CACNA1E  | 0           | 0           | 2.942280266 |             |
| P2RX5       | P2RX5    | 5381.309523 | 4727.405348 | 1598.996235 |             |
| 2474.457704 |          |             |             |             |             |
| ARNT        | ARNT     | 3946.918657 | 4299.561959 | 3678.58339  |             |
| 3971.097599 |          |             |             |             |             |
| TSPAN15     | TSPAN15  | 153.1266937 | 101.238662  | 68.01866831 |             |
| 152.9985738 |          |             |             |             |             |
| ASZ1        | ASZ1     | 0           | 0           | 2.230120273 | 0           |
| CTDSP2      | CTDSP2   | 2030.23079  | 5754.757683 | 4113.456843 |             |
| 2748.089768 |          |             |             |             |             |
| TFEB        | TFEB     | 570.8396474 | 537.0050768 | 679.071623  |             |
| 563.937051  |          |             |             |             |             |
| AXIN1       | AXIN1    | 255.2111562 | 336.2884251 | 422.6077916 |             |
| 305.0163876 |          |             |             |             |             |
| RBBP7       | RBBP7    | 20622.1031  | 17780.15006 | 14214.78662 |             |
| 17225.08944 |          |             |             |             |             |
| VIPR2       | VIPR2    | 31.25034566 | 18.48706002 | 3.345180409 |             |
| 26.48052239 |          |             |             |             |             |
| P2RY1       | P2RY1    | 16.66685102 | 92.4353001  | 0           | 44.13420399 |
| LILRA2      | LILRA2   | 0           | 3.521344766 | 0           | 0.980760089 |
| NFU1        | NFU1     | 2067.731205 | 1630.382627 | 2129.76486  |             |
| 2079.211388 |          |             |             |             |             |
| TMEM138     | TMEM138  | 2992.741436 | 2197.319134 | 3009.547308 |             |
| 2315.574569 |          |             |             |             |             |
| NUP62       | NUP62    | 11629.2953  | 9808.705845 | 10169.34844 |             |
| 10753.05361 |          |             |             |             |             |
| GOLM1       | GOLM1    | 541.6726581 | 454.2534748 | 363.5096044 |             |
| 331.49691   |          |             |             |             |             |
| PKN2-AS1    | PKN2-AS1 |             | 14.58349464 | 10.5640343  | 0           |
| 2.942280266 |          |             |             |             |             |
| RPGR        | RPGR     | 612.506775  | 470.9798624 | 664.5758412 |             |
| 583.5522528 |          |             |             |             |             |
| CUTA        | CUTA     | 0           | 3.521344766 | 1.115060136 | 0.980760089 |
| XAB2        | XAB2     | 381.2542171 | 1173.488143 | 597.672233  |             |
| 461.9380018 |          |             |             |             |             |
| SORCS2      | SORCS2   | 0           | 7.042689532 | 0           | 0           |
| IL24        | IL24     | 162.5017974 | 278.1862365 | 352.3590031 |             |

|                 |               |               |               |  |  |
|-----------------|---------------|---------------|---------------|--|--|
| 532.5527281     |               |               |               |  |  |
| PRDX3 PRDX3     | 38648.34416   | 30916.52671   | 21917.62204   |  |  |
| 24626.88583     |               |               |               |  |  |
| AP3M2 AP3M2     | 3016.700034   | 2497.513775   | 2309.289542   |  |  |
| 3000.145111     |               |               |               |  |  |
| TGOLN2 TGOLN2   | 10162.61241   | 11103.68038   | 11211.92967   |  |  |
| 11918.1966      |               |               |               |  |  |
| KIF2C KIF2C     | 11388.66764   | 9302.512535   | 5545.194058   |  |  |
| 6789.802094     |               |               |               |  |  |
| RALBP1 RALBP1   | 2383.359696   | 2408.59982    | 2223.429912   |  |  |
| 2235.152242     |               |               |               |  |  |
| MIDN MIDN       | 367.7124006   | 955.1647677   | 308.8716577   |  |  |
| 519.802847      |               |               |               |  |  |
| P2RY13 P2RY13   | 1.041678189   | 0 0           | 0             |  |  |
| CD151 CD151     | 1000.011061   | 1271.20546    | 939.9956949   |  |  |
| 783.6273108     |               |               |               |  |  |
| TAS2R20 TAS2R20 | 42.70880574   | 32.57243908   | 52.4078264    |  |  |
| 53.94180488     |               |               |               |  |  |
| TAS2R50 TAS2R50 | 0 1.760672383 | 0             | 0             |  |  |
| TAS2R19 TAS2R19 | 6.250069132   | 6.16235334    | 13.38072164   |  |  |
| 21.57672195     |               |               |               |  |  |
| TAS2R46 TAS2R46 | 0 1.760672383 | 0             | 0             |  |  |
| TAS2R31 TAS2R31 | 3.125034566   | 3.521344766   | 3.345180409   |  |  |
| 0.980760089     |               |               |               |  |  |
| TAS2R43 TAS2R43 | 1.041678189   | 11.44437049   | 5.575300681   |  |  |
| 12.74988115     |               |               |               |  |  |
| ESYT1 ESYT1     | 46833.85136   | 44601.3528    | 19241.47771   |  |  |
| 27092.51669     |               |               |               |  |  |
| ARHGAP40        | ARHGAP40      | 0 0           | 0 4.903800443 |  |  |
| PPM1M PPM1M     | 3314.619996   | 3059.168265   | 2415.220255   |  |  |
| 3543.4862       |               |               |               |  |  |
| EPS15 EPS15     | 4467.757751   | 6615.726479   | 4412.292959   |  |  |
| 4867.51232      |               |               |               |  |  |
| ARHGEF7 ARHGEF7 | 1892.729269   | 3308.303407   | 2235.695573   |  |  |
| 2368.535614     |               |               |               |  |  |
| ATP6V1F ATP6V1F | 5722.979969   | 4747.65308    | 4825.98027    |  |  |
| 4326.132751     |               |               |               |  |  |
| CAPN1 CAPN1     | 8646.970644   | 8505.808282   | 5119.241086   |  |  |
| 6714.283567     |               |               |               |  |  |
| SERF2 SERF2     | 21462.7374    | 26208.48876   | 18193.32118   |  |  |
| 19654.43218     |               |               |               |  |  |
| FAM209B FAM209B | 46.87551849   | 19.36739621   | 23.41626286   |  |  |
| 21.57672195     |               |               |               |  |  |
| C1orf100        | C1orf100      | 0 0.880336191 | 0 0           |  |  |
| DCUN1D2 DCUN1D2 | 270.8363291   | 289.630607    | 344.5535821   |  |  |
| 245.1900222     |               |               |               |  |  |
| SLC3A2 SLC3A2   | 20990.85718   | 16466.68846   | 37428.10853   |  |  |
| 20376.2716      |               |               |               |  |  |
| ZNF682 ZNF682   | 167.7101884   | 191.9132897   | 366.8547848   |  |  |
| 289.3242262     |               |               |               |  |  |



|             |          |             |             |             |
|-------------|----------|-------------|-------------|-------------|
| PSMB5       | PSMB5    | 11405.33449 | 7481.977291 | 9818.1045   |
| 8969.051011 |          |             |             |             |
| ELOVL6      | ELOVL6   | 200.0022122 | 493.8686034 | 160.5686596 |
| 209.882659  |          |             |             |             |
| LEF1        | LEF1     | 5649.020817 | 7433.5588   | 17267.82127 |
| 16646.44098 |          |             |             |             |
| TTC13       | TTC13    | 1553.142179 | 1479.845138 | 795.0378772 |
| 1143.566263 |          |             |             |             |
| RPL22L1     | RPL22L1  | 820.8424127 | 1217.504953 | 932.1902739 |
| 1285.776476 |          |             |             |             |
| ARHGEF3     | ARHGEF3  | 8543.844504 | 3417.465095 | 17140.70441 |
| 10202.8472  |          |             |             |             |
| MGA         | MGA      | 1619.809583 | 2871.656656 | 2988.361165 |
| 2401.881457 |          |             |             |             |
| LRRN3       | LRRN3    | 14580.36961 | 7124.560797 | 8465.536555 |
| 6402.401859 |          |             |             |             |
| FAM86C1     | FAM86C1  | 308.3367439 | 225.366065  | 401.4216491 |
| 453.111161  |          |             |             |             |
| SMARCD2     | SMARCD2  | 11102.20614 | 9788.458113 | 8230.258866 |
| 9313.297802 |          |             |             |             |
| PANK4       | PANK4    | 3158.368268 | 3023.074481 | 2173.252206 |
| 2454.842502 |          |             |             |             |
| NGFRAP1     | NGFRAP1  | 507.2972779 | 829.2766923 | 961.1818375 |
| 1223.007831 |          |             |             |             |
| LRR1        | LRR1     | 4712.552126 | 4023.136395 | 3187.95693  |
| 3003.087392 |          |             |             |             |
| TSPAN13     | TSPAN13  | 350.0038714 | 388.2282604 | 202.9409448 |
| 265.785984  |          |             |             |             |
| VOPP1       | VOPP1    | 3828.167343 | 4192.160944 | 2205.58895  |
| 3670.985012 |          |             |             |             |
| TDRD3       | TDRD3    | 376.0458261 | 474.5012072 | 352.3590031 |
| 297.1703069 |          |             |             |             |
| CARF        | CARF     | 230.2108797 | 311.6390118 | 375.7752659 |
| 418.7845579 |          |             |             |             |
| UQCRB       | UQCRB    | 5846.939673 | 6695.837072 | 4669.871851 |
| 3956.386198 |          |             |             |             |
| RGS5        | RGS5     | 282.2947891 | 176.0672383 | 306.6415375 |
| 216.7479796 |          |             |             |             |
| RND3        | RND3     | 1.041678189 | 0           | 0           |
| H3F3C       | H3F3C    | 5.208390943 | 7.923025723 | 6.690360818 |
| 19.61520177 |          |             |             |             |
| SMC03       | SMC03    | 8.33342551  | 1.760672383 | 0           |
| SLC14A2     | SLC14A2  | 21.87524196 | 26.41008574 | 10.78836098 |
| 5.884560532 |          |             |             | 59.09818722 |
| CD82        | CD82     | 21334.61098 | 17820.64552 | 10290.89    |
| 17553.64407 |          |             |             |             |
| DCDC2       | DCDC2    | 1.041678189 | 0           | 3.923040355 |
| FAM149A     | FAM149A  | 17.70852921 | 24.64941336 | 30.10662368 |
| 34.3266031  |          |             |             |             |
| KIAA1429    | KIAA1429 |             | 1507.308339 | 3865.556217 |

|                 |               |             |             |  |
|-----------------|---------------|-------------|-------------|--|
| 2274.722678     | 3716.099976   |             |             |  |
| NPIPA1 NPIPA1   | 35.41705842   | 60.74319721 | 117.0813143 |  |
| 50.01876452     |               |             |             |  |
| WDR45 WDR45     | 3040.658633   | 2770.417994 | 2284.758219 |  |
| 2627.456278     |               |             |             |  |
| MITF MITF       | 7.291747321   | 11.44437049 | 2.230120273 |  |
| 1.961520177     |               |             |             |  |
| DIAPH3 DIAPH3   | 1513.558408   | 1920.013234 | 914.3493117 |  |
| 1126.893342     |               |             |             |  |
| CATSPER2        | CATSPER2      | 25.00027653 | 33.45277527 |  |
| 39.02710477     | 50.01876452   |             |             |  |
| ZMYM2 ZMYM2     | 1682.310275   | 2769.537658 | 2127.53474  |  |
| 2373.439415     |               |             |             |  |
| HRH4 HRH4       | 8.33342551    | 66.02521436 | 3.345180409 |  |
| 84.34536763     |               |             |             |  |
| PRR5L PRR5L     | 944.8021171   | 459.5354919 | 573.14091   |  |
| 290.3049862     |               |             |             |  |
| RAD1 RAD1       | 3368.787262   | 3023.074481 | 3261.550899 |  |
| 2787.320172     |               |             |             |  |
| DHFR DHFR       | 5891.731835   | 6435.257559 | 3449.996062 |  |
| 5132.317544     |               |             |             |  |
| RNF145 RNF145   | 1277.097459   | 4497.637602 | 2072.896793 |  |
| 1845.790487     |               |             |             |  |
| FBLN2 FBLN2     | 3.125034566   | 0.880336191 | 28.99156354 |  |
| 1.961520177     |               |             |             |  |
| POGLUT1 POGLUT1 | 2639.61253    | 1953.466009 | 2065.091372 |  |
| 2013.500462     |               |             |             |  |
| AMPD2 AMPD2     | 3658.373799   | 3030.117171 | 3442.190641 |  |
| 4504.631087     |               |             |             |  |
| IFT20 IFT20     | 880.2180694   | 873.2935019 | 962.2968976 |  |
| 901.3185215     |               |             |             |  |
| RAB42 RAB42     | 1.041678189   | 3.521344766 | 0 0         |  |
| SLC8A3 SLC8A3   | 3.125034566   | 0 0         | 1.961520177 |  |
| DENND2C DENND2C | 25.00027653   | 23.76907717 | 39.02710477 |  |
| 58.84560532     |               |             |             |  |
| KNG1 KNG1       | 7.291747321   | 2.641008574 | 13.38072164 |  |
| 4.903800443     |               |             |             |  |
| SIKE1 SIKE1     | 2962.532769   | 3266.927606 | 3474.527385 |  |
| 3505.236557     |               |             |             |  |
| KCNE1 KCNE1     | 0 0           | 1.115060136 | 0           |  |
| MRO MRO         | 0 0.880336191 | 0           | 0           |  |
| DYNC1I1 DYNC1I1 | 0 0           | 16.72590204 | 4.903800443 |  |
| FKTN FKTN       | 703.1327774   | 762.3711418 | 828.4896812 |  |
| 629.6479769     |               |             |             |  |
| ITGA2 ITGA2     | 408.33785     | 1037.036034 | 115.9662542 |  |
| 252.0553428     |               |             |             |  |
| SERAC1 SERAC1   | 1547.933788   | 1176.129152 | 1055.961949 |  |
| 786.5695911     |               |             |             |  |
| SFXN2 SFXN2     | 1988.563662   | 1857.509364 | 848.5607637 |  |
| 1346.583602     |               |             |             |  |

|             |             |             |             |             |
|-------------|-------------|-------------|-------------|-------------|
| SREK1IP1    | SREK1IP1    | 951.0521863 | 1190.214531 |             |
| 895.3932894 | 869.9341986 |             |             |             |
| RELL2       | RELL2       | 748.9666177 | 798.4649256 | 713.6384872 |
| 831.6845552 |             |             |             |             |
| AP5B1       | AP5B1       | 1960.438351 | 2393.634105 | 2062.861252 |
| 2303.805448 |             |             |             |             |
| RABL3       | RABL3       | 3590.664716 | 2990.502042 | 2737.472635 |
| 3337.526582 |             |             |             |             |
| FAM126B     | FAM126B     | 2351.067672 | 2514.240163 | 3027.38827  |
| 2416.592858 |             |             |             |             |
| LIMK1       | LIMK1       | 156.2517283 | 573.0988606 | 171.719261  |
| 230.4786208 |             |             |             |             |
| DMBT1       | DMBT1       | 0           | 1.760672383 | 0           |
| CLDN4       | CLDN4       | 0           | 0           | 1.115060136 |
| CCR1        | CCR1        | 2572.945126 | 1078.411835 | 344.5535821 |
| 593.3598536 |             |             |             |             |
| CPD         | CPD         | 2287.525302 | 4276.673218 | 2308.174482 |
| 3352.237983 |             |             |             |             |
| CDC42BPB    | CDC42BPB    |             | 63.54236951 | 44.01680957 |
| 112.6210738 | 83.36460754 |             |             |             |
| CFC1        | CFC1        | 0           | 0           | 0.980760089 |
| ARHGAP24    | ARHGAP24    |             | 0           | 4.401680957 |
|             |             |             |             | 4.460240545 |
|             | 7.846080709 |             |             |             |
| SRSF11      | SRSF11      | 8266.758106 | 7463.490231 | 6891.071642 |
| 7372.373587 |             |             |             |             |
| THY1        | THY1        | 30.20866747 | 19.36739621 | 94.78011158 |
| 160.8446545 |             |             |             |             |
| PPP1CA      | PPP1CA      | 37778.54287 | 27574.77052 | 20140.21618 |
| 24310.10032 |             |             |             |             |
| SLC22A15    | SLC22A15    |             | 13.54181645 | 17.60672383 |
|             | 43.1534439  |             |             | 0           |
| TP73        | TP73        | 123.9597045 | 357.4164937 | 53.52288654 |
| 153.9793339 |             |             |             |             |
| KIAA0586    | KIAA0586    |             | 1443.76597  | 1805.569529 |
| 1942.434757 | 1948.770296 |             |             |             |
| NT5C1B      | NT5C1B      | 40.62544936 | 21.12806859 | 55.75300681 |
| 46.09572417 |             |             |             |             |
| TBC1D15     | TBC1D15     | 3668.790581 | 3976.478577 | 4378.841155 |
| 4612.514697 |             |             |             |             |
| ALDH2       | ALDH2       | 4.166712755 | 22.00840479 | 55.75300681 |
| 17.6536816  |             |             |             |             |
| STMN2       | STMN2       | 0           | 0           | 3.345180409 |
| ZNF609      | ZNF609      | 430.2130919 | 946.3614058 | 432.6433329 |
| 506.0722058 |             |             |             |             |
| DFNA5       | DFNA5       | 172.9185793 | 192.7936259 | 227.4722678 |
| 384.4579548 |             |             |             |             |
| ZNF319      | ZNF319      | 298.9616402 | 597.748274  | 606.5927141 |
| 523.7258873 |             |             |             |             |
| FIGN        | FIGN        | 0           | 0           | 0.980760089 |
| TNFRSF21    | TNFRSF21    |             | 8.33342551  | 36.09378385 |

|                 |               |             |               |  |
|-----------------|---------------|-------------|---------------|--|
| 107.0457731     | 77.480047     |             |               |  |
| ZFAND2B ZFAND2B | 2196.8993     | 1835.500959 | 2291.44858    |  |
| 1912.482173     |               |             |               |  |
| ST3GAL4 ST3GAL4 | 365.6290442   | 419.0400271 | 311.101778    |  |
| 355.0351521     |               |             |               |  |
| FLJ20021        | FLJ20021      | 59.37565676 | 92.4353001    |  |
| 64.6734879      | 41.19192372   |             |               |  |
| MIR18A MIR18A   | 0 3.521344766 | 0           | 0             |  |
| MIR17 MIR17     | 1.041678189   | 2.641008574 | 0 0           |  |
| C17orf62        | C17orf62      | 11707.42116 | 10512.09446   |  |
| 7877.899863     | 10458.82559   |             |               |  |
| MURC MURC       | 4.166712755   | 4.401680957 | 7.805420954   |  |
| 2.942280266     |               |             |               |  |
| CYP2W1 CYP2W1   | 0 0           | 2.230120273 | 0.980760089   |  |
| CHD7 CHD7       | 1552.100501   | 2020.371559 | 2888.005753   |  |
| 2692.186443     |               |             |               |  |
| CCDC146 CCDC146 | 86.45928966   | 54.58084387 | 206.2861252   |  |
| 52.96104479     |               |             |               |  |
| CCT3 CCT3       | 36042.06533   | 24221.56997 | 28601.2925    |  |
| 28537.1763      |               |             |               |  |
| FBXW11 FBXW11   | 2598.987081   | 4278.43389  | 3709.805073   |  |
| 3716.099976     |               |             |               |  |
| BC01 BC01       | 1.041678189   | 0.880336191 | 0 0           |  |
| SPA17 SPA17     | 170.8352229   | 205.9986688 | 157.2234792   |  |
| 177.517576      |               |             |               |  |
| MYEOV MYEOV     | 1.041678189   | 0.880336191 | 0 2.942280266 |  |
| CDC42EP3        | CDC42EP3      | 1210.430055 | 1509.776568   |  |
| 2385.113631     | 2452.880982   |             |               |  |
| DAAM1 DAAM1     | 792.7171016   | 1295.854874 | 711.4083669   |  |
| 407.0154368     |               |             |               |  |
| ADNP2 ADNP2     | 1322.9313     | 1790.603813 | 1255.557713   |  |
| 1242.623032     |               |             |               |  |
| EDRF1 EDRF1     | 2401.068225   | 2538.00924  | 2439.751578   |  |
| 2456.804022     |               |             |               |  |
| JADE2 JADE2     | 1218.763481   | 1478.964802 | 2622.62144    |  |
| 1608.446545     |               |             |               |  |
| GPR150 GPR150   | 4.166712755   | 16.72638764 | 10.03554123   |  |
| 29.42280266     |               |             |               |  |
| SNX25 SNX25     | 858.3428275   | 1504.494551 | 909.8890712   |  |
| 1547.63942      |               |             |               |  |
| ZNF681 ZNF681   | 216.6690632   | 239.4514441 | 408.1120099   |  |
| 446.2458403     |               |             |               |  |
| NUP35 NUP35     | 2759.405522   | 2295.036451 | 2127.53474    |  |
| 2200.825639     |               |             |               |  |
| IL17D IL17D     | 12.50013826   | 9.683698106 | 37.91204463   |  |
| 19.61520177     |               |             |               |  |
| SYNGR1 SYNGR1   | 11.45846008   | 7.042689532 | 72.47890886   |  |
| 12.74988115     |               |             |               |  |
| TTC7A TTC7A     | 10775.11918   | 11822.03471 | 6856.504778   |  |
| 8410.99852      |               |             |               |  |

|             |         |             |             |             |
|-------------|---------|-------------|-------------|-------------|
| IFT43       | IFT43   | 296.8782838 | 304.5963222 | 375.7752659 |
| 418.7845579 |         |             |             |             |
| TRPT1       | TRPT1   | 1978.14688  | 2024.77324  | 1508.676364 |
| 2001.731341 |         |             |             |             |
| ERBB2       | ERBB2   | 127.084739  | 125.8880754 | 266.4993726 |
| 294.2280266 |         |             |             |             |
| PRNP        | PRNP    | 6692.782362 | 6366.591336 | 9056.518427 |
| 8404.1332   |         |             |             |             |
| COPZ1       | COPZ1   | 9059.475207 | 7394.824008 | 7367.20232  |
| 6990.857912 |         |             |             |             |
| GDAP2       | GDAP2   | 2285.441946 | 1843.423985 | 2372.84797  |
| 1675.138231 |         |             |             |             |
| CCDC126     | CCDC126 | 685.4242482 | 607.4319721 | 973.447499  |
| 920.9337233 |         |             |             |             |
| DTNB        | DTNB    | 976.0524628 | 1145.317385 | 1105.024595 |
| 1121.008781 |         |             |             |             |
| CIDEC       | CIDEC   | 4.166712755 | 0           | 2.942280266 |
| B3GNT7      | B3GNT7  | 0           | 1.760672383 | 0           |
| DDX50       | DDX50   | 2905.240468 | 2496.633439 | 3073.105736 |
| 3811.233705 |         |             |             |             |
| METRN       | METRN   | 315.6284912 | 445.4501129 | 448.2541748 |
| 481.5532035 |         |             |             |             |
| SCNM1       | SCNM1   | 3121.909532 | 2480.787387 | 2440.866638 |
| 2505.842027 |         |             |             |             |
| ZNF311      | ZNF311  | 0           | 1.760672383 | 1.115060136 |
| RAB12       | RAB12   | 38.54209298 | 50.17916291 | 93.66505145 |
| 45.11496408 |         |             |             |             |
| C3orf70     | C3orf70 | 0           | 2.641008574 | 0           |
| CAB39       | CAB39   | 22986.71259 | 19303.13167 | 16449.36713 |
| 14359.30846 |         |             |             |             |
| TEAD1       | TEAD1   | 1.041678189 | 15.84605145 | 1.115060136 |
| 29.42280266 |         |             |             |             |
| C1QL1       | C1QL1   | 5.208390943 | 5.282017149 | 14.49578177 |
| 3.923040355 |         |             |             |             |
| ETV5        | ETV5    | 21.87524196 | 44.89714576 | 11.15060136 |
| 49.03800443 |         |             |             |             |
| FXYS5       | FXYS5   | 10840.74491 | 8845.618052 | 7712.870963 |
| 9633.025591 |         |             |             |             |
| FAM26F      | FAM26F  | 301.0449965 | 112.6830325 | 352.3590031 |
| 215.7672195 |         |             |             |             |
| MUC21       | MUC21   | 1.041678189 | 0           | 0           |
| GRIA4       | GRIA4   | 0           | 0.880336191 | 0           |
| KANK2       | KANK2   | 107.2928534 | 143.4947992 | 32.33674395 |
| 67.67244612 |         |             |             |             |
| ISOC2       | ISOC2   | 1298.972701 | 1708.732548 | 1028.085446 |
| 1136.700943 |         |             |             |             |
| ECSCR       | ECSCR   | 33.33370204 | 57.22185244 | 16.72590204 |
| 36.28812328 |         |             |             |             |
| PTGER4      | PTGER4  | 7005.285819 | 6388.599741 | 5668.965733 |
| 8766.033673 |         |             |             |             |

|              |              |             |             |             |             |
|--------------|--------------|-------------|-------------|-------------|-------------|
| SULT1A1      | SULT1A1      | 343.7538023 | 397.0316223 | 154.9933589 |             |
| 423.6883583  |              |             |             |             |             |
| SULT1A2      | SULT1A2      | 6.250069132 | 5.282017149 | 8.92048109  |             |
| 5.884560532  |              |             |             |             |             |
| LOC100128770 | LOC100128770 |             | 4.166712755 | 4.401680957 | 0           |
| 2.942280266  |              |             |             |             |             |
| KIAA1217     | KIAA1217     |             | 244.7943743 | 508.8343187 |             |
| 88.08975076  | 376.611874   |             |             |             |             |
| CAMTA1       | CAMTA1       | 1242.722079 | 1483.366483 | 1403.860712 |             |
| 1530.966498  |              |             |             |             |             |
| MKRN9P       | MKRN9P       | 0           | 0           | 1.115060136 | 0           |
| FBXW4P1      | FBXW4P1      | 26.04195472 | 38.73479242 | 44.60240545 |             |
| 41.19192372  |              |             |             |             |             |
| TYW3         | TYW3         | 2589.611977 | 1625.980946 | 2101.888357 |             |
| 1778.118041  |              |             |             |             |             |
| PDHB         | PDHB         | 9343.853353 | 7931.829085 | 5991.218112 |             |
| 7068.337959  |              |             |             |             |             |
| CTPS1        | CTPS1        | 13739.73531 | 8704.764261 | 9304.061777 |             |
| 9093.607542  |              |             |             |             |             |
| POU5F1P3     | POU5F1P3     |             | 2.083356377 | 0           | 4.460240545 |
| 1.961520177  |              |             |             |             |             |
| UHRF1        | UHRF1        | 16378.30616 | 15959.61481 | 11083.69775 |             |
| 14486.80727  |              |             |             |             |             |
| NONO         | NONO         | 27280.51008 | 21782.15838 | 22856.50267 |             |
| 23667.70246  |              |             |             |             |             |
| LOC101928358 | LOC101928358 |             | 0           | 4.401680957 | 0           |
| SFTPD        | SFTPD        | 1.041678189 | 0.880336191 | 0           | 2.942280266 |
| APC          | APC          | 998.969383  | 1298.495882 | 1650.289002 |             |
| 1486.832294  |              |             |             |             |             |
| SHROOM1      | SHROOM1      | 76.04250777 | 36.09378385 | 2.230120273 |             |
| 22.55748204  |              |             |             |             |             |
| FOLH1        | FOLH1        | 0           | 0           | 1.961520177 |             |
| PPM1F        | PPM1F        | 894.8015641 | 1178.77016  | 1035.890867 |             |
| 1223.007831  |              |             |             |             |             |
| DSCR3        | DSCR3        | 5831.3145   | 4561.902144 | 6265.522906 |             |
| 5469.699015  |              |             |             |             |             |
| ADAMTS10     | ADAMTS10     |             | 5.208390943 | 51.93983529 |             |
| 7.805420954  | 65.71092594  |             |             |             |             |
| ARHGAP11A    | ARHGAP11A    |             | 8390.71781  | 7570.01091  |             |
| 4218.272495  | 4910.665764  |             |             |             |             |
| LINC00189    | LINC00189    |             | 0           | 0           | 2.942280266 |
| TNFRSF14     | TNFRSF14     |             | 3620.873384 | 3263.406262 |             |
| 2777.614799  | 3723.946057  |             |             |             |             |
| RB1CC1       | RB1CC1       | 3309.411605 | 3140.159195 | 4732.315218 |             |
| 3836.733467  |              |             |             |             |             |
| CLCN1        | CLCN1        | 5.208390943 | 0.880336191 | 0           | 8.826840798 |
| IL1B         | IL1B         | 3.125034566 | 2.641008574 | 0           | 12.74988115 |
| AGA          | AGA          | 1740.644253 | 1333.70933  | 1420.586614 |             |
| 1276.949635  |              |             |             |             |             |
| CTSG         | CTSG         | 0           | 1.760672383 | 0           | 2.942280266 |

|                |                |             |             |             |
|----------------|----------------|-------------|-------------|-------------|
| ZNF133         | ZNF133         | 559.3811873 | 389.1085966 | 566.4505492 |
| 530.591208     |                |             |             |             |
| CCL4L1         | CCL4L1         | 1.041678189 | 10.5640343  | 7.805420954 |
| 9.807600887    |                |             |             |             |
| CHIC2          | CHIC2          | 1348.973254 | 876.8148467 | 1509.791425 |
| 1278.911156    |                |             |             |             |
| HAVCR1         | HAVCR1         | 25.00027653 | 74.82857627 | 46.83252572 |
| 40.21116364    |                |             |             |             |
| RSPRY1         | RSPRY1         | 3008.366609 | 2714.956814 | 3162.310546 |
| 2646.090719    |                |             |             |             |
| MED22          | MED22          | 2443.777031 | 2366.343683 | 2369.50279  |
| 2678.455802    |                |             |             |             |
| ZFYVE27        | ZFYVE27        | 2155.232172 | 1764.193728 | 2000.417884 |
| 2438.16958     |                |             |             |             |
| CGB5           | CGB5           | 0           | 0           | 0.980760089 |
| TDP2           | TDP2           | 3639.623591 | 3246.679874 | 2885.775633 |
| 2872.6463      |                |             |             |             |
| ACTR6          | ACTR6          | 2839.614742 | 2238.694935 | 2491.044344 |
| 2780.454851    |                |             |             |             |
| ABCG1          | ABCG1          | 473.9635759 | 588.0645759 | 343.438522  |
| 881.7033197    |                |             |             |             |
| STXBP5L        | STXBP5L        | 2.083356377 | 9.683698106 | 0           |
| TICAM1         | TICAM1         | 1397.932129 | 1964.030043 | 0.980760089 |
| 1125.095677    |                |             |             |             |
| 1315.199279    |                |             |             |             |
| ERG            | ERG            | 0           | 0           | 6.865320621 |
| MMP24-AS1      | MMP24-AS1      | 177.2945617 | 155.2100501 | 448.9714576 |
| 166.7292151    |                |             |             |             |
| EDA            | EDA            | 6.250069132 | 0.880336191 | 200.7108245 |
| 24.51900222    |                |             |             |             |
| KRT7           | KRT7           | 426.0463792 | 60.74319721 | 141.6126373 |
| 72.57624656    |                |             |             |             |
| TMEM189-UBE2V1 | TMEM189-UBE2V1 | 11911.07238 | 16883.52008 | 13627.60424 |
| 13641.39207    |                |             |             |             |
| DNMT3A         | DNMT3A         | 1370.848496 | 1734.262297 | 1742.838993 |
| 2561.745352    |                |             |             |             |
| HSD17B4        | HSD17B4        | 2653.154347 | 2736.084883 | 2186.632927 |
| 2771.628011    |                |             |             |             |
| NLRC4          | NLRC4          | 26.04195472 | 101.238662  | 28.99156354 |
| 33.34584301    |                |             |             |             |
| NUP153         | NUP153         | 1494.808201 | 4039.862783 | 1834.273924 |
| 1458.390252    |                |             |             |             |
| NR1H4          | NR1H4          | 0           | 2.230120273 | 0           |
| KIR3DX1        | KIR3DX1        | 0           | 20.2477324  | 5.575300681 |
| 17.6536816     |                |             |             |             |
| SNRNP35        | SNRNP35        | 1865.645636 | 1573.160774 | 1383.789629 |
| 1494.678375    |                |             |             |             |
| SYNGAP1        | SYNGAP1        | 1.041678189 | 9.683698106 | 2.230120273 |
| 3.923040355    |                |             |             |             |
| RUNDC1         | RUNDC1         | 1882.312487 | 1443.751354 | 1708.272129 |
| 1857.559608    |                |             |             |             |
| MYB            | MYB            | 5575.061666 | 6843.733552 | 2600.320238 |

|             |          |             |             |             |             |
|-------------|----------|-------------|-------------|-------------|-------------|
| 3197.277889 |          |             |             |             |             |
| LANCL3      | LANCL3   | 32.29202385 | 12.32470668 | 25.64638313 |             |
| 3.923040355 |          |             |             |             |             |
| ALG1L       | ALG1L    | 15.62517283 | 15.84605145 | 21.18614259 |             |
| 26.48052239 |          |             |             |             |             |
| KRBOX4      | KRBOX4   | 917.7184842 | 743.0037456 | 1120.635437 |             |
| 783.6273108 |          |             |             |             |             |
| CSPG5       | CSPG5    | 9.375103698 | 16.72638764 | 10.03554123 |             |
| 23.53824213 |          |             |             |             |             |
| RAB35       | RAB35    | 1605.226089 | 3294.218028 | 1518.711906 |             |
| 1538.812579 |          |             |             |             |             |
| CTSA        | CTSA     | 7767.794253 | 6111.293841 | 7817.686615 |             |
| 7839.215389 |          |             |             |             |             |
| AURKA       | AURKA    | 12585.55588 | 9323.640604 | 6074.847622 |             |
| 7013.415394 |          |             |             |             |             |
| CUL3        | CUL3     | 7272.997113 | 6250.386959 | 7580.178806 |             |
| 6570.111834 |          |             |             |             |             |
| CUL4A       | CUL4A    | 12120.9674  | 9473.297756 | 8070.805266 |             |
| 9156.376188 |          |             |             |             |             |
| BRPF1       | BRPF1    | 3666.707224 | 3756.394529 | 3716.495434 |             |
| 3466.986913 |          |             |             |             |             |
| CARM1       | CARM1    | 148.959981  | 504.4326377 | 189.5602232 |             |
| 195.1712576 |          |             |             |             |             |
| RASGRP3     | RASGRP3  | 2069.814561 | 1408.537906 | 2410.760015 |             |
| 643.3786182 |          |             |             |             |             |
| CXADRP2     | CXADRP2  | 0           | 0           | 0.980760089 |             |
| INIP        | INIP     | 2885.448583 | 2722.87984  | 2954.909361 |             |
| 3009.952712 |          |             |             |             |             |
| ZNF71       | ZNF71    | 669.7990753 | 646.1667645 | 938.8806347 |             |
| 669.8591406 |          |             |             |             |             |
| SLC22A16    | SLC22A16 |             | 0           | 0.880336191 | 0           |
| WRNIP1      | WRNIP1   | 5363.600994 | 3988.803283 | 4605.198363 | 0           |
| 5186.259349 |          |             |             |             |             |
| RPL13A      | RPL13A   | 17975.19882 | 18851.5192  | 29230.18641 |             |
| 24037.44901 |          |             |             |             |             |
| NET1        | NET1     | 3170.868406 | 4678.986857 | 1804.1673   |             |
| 1891.886211 |          |             |             |             |             |
| ADORA3      | ADORA3   | 20.83356377 | 17.60672383 | 47.94758586 |             |
| 20.59596186 |          |             |             |             |             |
| ABAT        | ABAT     | 1430.224153 | 844.2424076 | 701.3728257 |             |
| 621.8018962 |          |             |             |             |             |
| RSRP1       | RSRP1    | 2406.276616 | 2074.072067 | 2370.61785  |             |
| 2508.784307 |          |             |             |             |             |
| HLA-DRA     | HLA-DRA  | 881.2597476 | 2793.306735 | 202.9409448 |             |
| 556.0909703 |          |             |             |             |             |
| RARG        | RARG     | 941.6770826 | 1155.001083 | 1069.342671 |             |
| 1311.276239 |          |             |             |             |             |
| IL18        | IL18     | 6.250069132 | 2.641008574 | 0           | 9.807600887 |
| CFL2        | CFL2     | 307.2950657 | 435.7664148 | 607.7077743 |             |
| 450.1688807 |          |             |             |             |             |



|              |              |             |             |             |
|--------------|--------------|-------------|-------------|-------------|
| ABHD2        | ABHD2        | 3242.744201 | 4330.373726 | 2586.939516 |
| 2505.842027  |              |             |             |             |
| SLU7         | SLU7         | 5257.349818 | 4555.739791 | 6632.377691 |
| 5634.466709  |              |             |             |             |
| C10orf12     | C10orf12     |             | 502.088887  | 740.362737  |
| 778.3119751  |              | 544.3218492 |             |             |
| PLEKHJ1      | PLEKHJ1      | 4350.048116 | 3435.952155 | 3082.026217 |
| 3419.910429  |              |             |             |             |
| TLE6         | TLE6         | 2.083356377 | 36.97412004 | 10.03554123 |
| 36.28812328  |              |             |             |             |
| CAST         | CAST         | 3391.704182 | 3815.377054 | 4371.035734 |
| 3632.735368  |              |             |             |             |
| ZMIZ1        | ZMIZ1        | 1118.762375 | 2442.932931 | 1059.307129 |
| 1053.336335  |              |             |             |             |
| TOB1         | TOB1         | 989.5942793 | 3092.621041 | 1169.698083 |
| 1999.769821  |              |             |             |             |
| YAF2         | YAF2         | 487.5053923 | 624.1583597 | 459.4047761 |
| 500.1876452  |              |             |             |             |
| NAMPT        | NAMPT        | 14226.19902 | 14139.07957 | 13270.33068 |
| 20022.21721  |              |             |             |             |
| RBM5         | RBM5         | 5842.77296  | 4940.446706 | 5967.801849 |
| 5762.946281  |              |             |             |             |
| LSM6         | LSM6         | 2483.360802 | 2522.163188 | 2402.954594 |
| 2231.229202  |              |             |             |             |
| CTDP1        | CTDP1        | 3329.203491 | 5245.043029 | 3137.779223 |
| 5046.010656  |              |             |             |             |
| DYNC2H1      | DYNC2H1      | 31.25034566 | 73.94824008 | 51.29276627 |
| 87.28764789  |              |             |             |             |
| LYRM4        | LYRM4        | 1566.683996 | 1996.602482 | 1584.500454 |
| 1820.290725  |              |             |             |             |
| RNF32        | RNF32        | 101.0427843 | 125.0077392 | 94.78011158 |
| 81.40308736  |              |             |             |             |
| BLCAP        | BLCAP        | 1785.436415 | 1352.19639  | 2812.181664 |
| 1629.042507  |              |             |             |             |
| HIST1H4A     | HIST1H4A     |             | 9.375103698 | 36.97412004 |
| 15.61084191  |              | 11.76912106 |             |             |
| NAP1L1       | NAP1L1       | 9325.103145 | 7806.821346 | 9586.171991 |
| 8492.401608  |              |             |             |             |
| MAP3K3       | MAP3K3       | 3150.034843 | 4116.452031 | 4073.314678 |
| 4098.596411  |              |             |             |             |
| C1orf127     | C1orf127     |             | 0           | 2.641008574 |
| 0.980760089  |              |             |             | 0           |
| TATDN3       | TATDN3       | 1634.393078 | 1343.393028 | 1218.760729 |
| 1074.913057  |              |             |             |             |
| NUP50-AS1    | NUP50-AS1    |             | 298.9616402 | 252.6564869 |
| 260.9240719  |              | 223.6133002 |             |             |
| LOC100507564 | LOC100507564 |             | 26.04195472 | 35.21344766 |
| 35.68192436  |              | 31.38432284 |             |             |
| MTA1         | MTA1         | 268.7529727 | 1186.693186 | 330.0578003 |
| 361.9004727  |              |             |             |             |

|                 |             |               |             |   |
|-----------------|-------------|---------------|-------------|---|
| GAREML GAREML   | 221.8774542 | 268.5025384   | 296.6059962 |   |
| 386.4194749     |             |               |             |   |
| TRIP13 TRIP13   | 7657.376365 | 5681.68978    | 3648.476766 |   |
| 4395.766717     |             |               |             |   |
| MAP3K2 MAP3K2   | 4716.718838 | 5278.495804   | 5632.168748 |   |
| 4492.861966     |             |               |             |   |
| MGC72080        | MGC72080    | 1266.680677   | 1515.058585 |   |
| 1097.219174     | 1393.660086 |               |             |   |
| LOC400927       | LOC400927   | 92.70935879   | 145.2554716 |   |
| 59.09818722     | 145.1524931 |               |             |   |
| MRPS31P5        | MRPS31P5    | 227.0858451   | 293.1519517 |   |
| 442.6788741     | 318.7470288 |               |             |   |
| TPTE2P6 TPTE2P6 | 4.166712755 | 7.923025723   | 7.805420954 |   |
| 4.903800443     |             |               |             |   |
| ZC3HC1 ZC3HC1   | 3266.7028   | 2169.148376   | 2194.438348 |   |
| 2436.20806      |             |               |             |   |
| PAPD4 PAPD4     | 4581.300674 | 4340.93776    | 5100.285063 |   |
| 4524.246289     |             |               |             |   |
| DDHD2 DDHD2     | 2985.449689 | 2679.743367   | 3205.797892 |   |
| 3481.698315     |             |               |             |   |
| FKBP11 FKBP11   | 1688.560344 | 1455.195724   | 2811.066604 |   |
| 2525.457228     |             |               |             |   |
| CCDC120 CCDC120 | 19.79188559 | 163.7425316   | 65.78854804 |   |
| 40.21116364     |             |               |             |   |
| SLC2A11 SLC2A11 | 94.79271517 | 127.6487478   | 258.6939516 |   |
| 124.5565313     |             |               |             |   |
| POM121L1P       | POM121L1P   | 0 0           | 2.230120273 | 0 |
| IL3RA IL3RA     | 0 0         | 0 0.980760089 |             |   |
| MAGED2 MAGED2   | 3435.454666 | 3472.926275   | 9106.696133 |   |
| 5713.908277     |             |               |             |   |
| COPE COPE       | 15297.0442  | 14321.30916   | 10299.81048 |   |
| 11192.43413     |             |               |             |   |
| ACSL1 ACSL1     | 3897.959782 | 2403.317803   | 3046.344292 |   |
| 2488.188345     |             |               |             |   |
| ZFP64 ZFP64     | 992.7193138 | 849.5244247   | 977.9077395 |   |
| 825.7999947     |             |               |             |   |
| SOCS4 SOCS4     | 1523.97519  | 1706.091539   | 1213.185428 |   |
| 1312.256999     |             |               |             |   |
| POLQ POLQ       | 2872.948444 | 4058.349843   | 1526.517327 |   |
| 2273.401886     |             |               |             |   |
| SS18L1 SS18L1   | 203.1272468 | 261.4598489   | 71.36384872 |   |
| 219.6902599     |             |               |             |   |
| PYHIN1 PYHIN1   | 2478.152411 | 2395.394777   | 2506.655186 |   |
| 2309.690009     |             |               |             |   |
| GINS4 GINS4     | 1894.812625 | 2032.696266   | 1117.290257 |   |
| 1582.946783     |             |               |             |   |
| CAPRIN1 CAPRIN1 | 27155.5087  | 26485.79466   | 22893.29966 |   |
| 25024.09366     |             |               |             |   |
| DDI2 DDI2       | 1426.05744  | 1280.889159   | 1324.691442 |   |
| 1113.162701     |             |               |             |   |

|             |             |             |             |             |
|-------------|-------------|-------------|-------------|-------------|
| ZNF438      | ZNF438      | 510.4223125 | 466.5781815 | 483.9360991 |
| 547.2641295 |             |             |             |             |
| MCM10       | MCM10       | 7932.379407 | 7400.106025 | 3942.852642 |
| 5563.851983 |             |             |             |             |
| ZNF845      | ZNF845      | 1162.512859 | 1291.453193 | 2046.13535  |
| 1737.906877 |             |             |             |             |
| PCED1B      | PCED1B      | 2865.656697 | 2596.991765 | 4582.89716  |
| 4027.000924 |             |             |             |             |
| FAM57A      | FAM57A      | 320.8368821 | 309.8783394 | 356.8192436 |
| 718.897145  |             |             |             |             |
| RNF39       | RNF39       | 177.0852921 | 113.5633687 | 226.3572077 |
| 139.2679326 |             |             |             |             |
| H2AFB3      | H2AFB3      | 0           | 0.880336191 | 0           |
| 2.942280266 |             |             |             |             |
| DPEP2       | DPEP2       | 152.0850156 | 208.6396774 | 510.6975424 |
| 353.0736319 |             |             |             |             |
| OSGEPL1     | OSGEPL1     | 735.4248012 | 547.5691111 | 806.1884785 |
| 938.5874049 |             |             |             |             |
| C10orf54    | C10orf54    |             | 5526.102791 | 5188.701512 |
| 6365.878318 | 8816.052437 |             |             |             |
| NECAB1      | NECAB1      | 57.29230038 | 156.6998421 | 189.5602232 |
| 161.8254146 |             |             |             |             |
| CALML4      | CALML4      | 415.6295973 | 487.7062501 | 220.781907  |
| 309.920188  |             |             |             |             |
| RAD51D      | RAD51D      | 1981.271915 | 2059.106352 | 1344.762524 |
| 1741.829917 |             |             |             |             |
| BTNL8       | BTNL8       | 39.58377117 | 17.60672383 | 0           |
| 41.19192372 |             |             |             |             |
| CRELD2      | CRELD2      | 4853.178681 | 3181.534996 | 2958.254542 |
| 3091.355799 |             |             |             |             |
| SEMA3B      | SEMA3B      | 0           | 6.16235334  | 4.460240545 |
| 2.942280266 |             |             |             |             |
| PQBP1       | PQBP1       | 3710.457708 | 2713.196142 | 3583.803278 |
| 3054.086916 |             |             |             |             |
| PTBP2       | PTBP2       | 452.0883339 | 463.9371729 | 880.8975076 |
| 467.8225623 |             |             |             |             |
| CD5         | CD5         | 12293.88598 | 9953.08098  | 14128.92699 |
| 19182.68657 |             |             |             |             |
| ZNHIT2      | ZNHIT2      | 613.5484531 | 512.3556634 | 873.0920867 |
| 748.3199477 |             |             |             |             |
| AP2A1       | AP2A1       | 791.6754234 | 1856.629028 | 774.9667947 |
| 902.2992816 |             |             |             |             |
| UBE2Q2P2    | UBE2Q2P2    |             | 5.208390943 | 0.880336191 |
| 2.230120273 | 1.961520177 |             |             |             |
| SNORD93     | SNORD93     | 0           | 0           | 1.115060136 |
| 0.980760089 |             |             |             |             |
| SNORD92     | SNORD92     | 3.125034566 | 2.641008574 | 0           |
| 0           |             |             |             |             |
| LOC644936   | LOC644936   |             | 3.125034566 | 4.401680957 |
| 1.115060136 | 0.980760089 |             |             |             |
| RDH11       | RDH11       | 3968.793899 | 3943.906138 | 4383.301396 |
| 5083.27954  |             |             |             |             |
| RGS12       | RGS12       | 48.95887487 | 127.6487478 | 160.5686596 |
| 153.9793339 |             |             |             |             |
| SNORA24     | SNORA24     | 39.58377117 | 23.76907717 | 11.15060136 |

|             |          |             |             |             |             |  |
|-------------|----------|-------------|-------------|-------------|-------------|--|
| 41.19192372 |          |             |             |             |             |  |
| SNORD67     | SNORD67  | 5.208390943 | 4.401680957 | 13.38072164 |             |  |
| 2.942280266 |          |             |             |             |             |  |
| SNORD65     | SNORD65  | 17.70852921 | 5.282017149 | 17.84096218 |             |  |
| 7.846080709 |          |             |             |             |             |  |
| SNORA11     | SNORA11  | 6.250069132 | 0           | 8.92048109  | 3.923040355 |  |
| NISCH       | NISCH    | 2162.52392  | 2818.836485 | 2566.868434 |             |  |
| 2746.128248 |          |             |             |             |             |  |
| SNORD59B    | SNORD59B |             | 42.70880574 | 37.85445623 |             |  |
| 51.29276627 |          | 79.44156718 |             |             |             |  |
| PAPD7       | PAPD7    | 289.5865365 | 291.3912794 | 268.7294928 |             |  |
| 339.3429907 |          |             |             |             |             |  |
| NXT2        | NXT2     | 2069.814561 | 1753.629693 | 2012.683546 |             |  |
| 1538.812579 |          |             |             |             |             |  |
| DHTKD1      | DHTKD1   | 2267.733417 | 2105.76417  | 1399.400471 |             |  |
| 1710.445595 |          |             |             |             |             |  |
| LSM14B      | LSM14B   | 78.12586415 | 137.3324459 | 93.66505145 |             |  |
| 88.26840798 |          |             |             |             |             |  |
| ZC4H2       | ZC4H2    | 561.4645437 | 727.1576941 | 855.2511245 |             |  |
| 944.4719654 |          |             |             |             |             |  |
| KLF10       | KLF10    | 2744.822027 | 2357.540321 | 4311.937547 |             |  |
| 3256.123494 |          |             |             |             |             |  |
| NPIPB5      | NPIPB5   | 197.9188559 | 394.3906138 | 225.2421475 |             |  |
| 245.1900222 |          |             |             |             |             |  |
| SMC2        | SMC2     | 9334.478249 | 10465.43664 | 5390.200699 |             |  |
| 6890.820383 |          |             |             |             |             |  |
| MIR6895     | MIR6895  | 1.041678189 | 0.880336191 | 3.345180409 | 0           |  |
| MIR8087     | MIR8087  | 0           | 2.641008574 | 0           |             |  |
| MIR6894     | MIR6894  | 2.083356377 | 21.12806859 | 10.03554123 |             |  |
| 9.807600887 |          |             |             |             |             |  |
| MIR6893     | MIR6893  | 1.041678189 | 0.880336191 | 1.115060136 | 0           |  |
| MIR8085     | MIR8085  | 4.166712755 | 19.36739621 | 4.460240545 |             |  |
| 14.71140133 |          |             |             |             |             |  |
| MIR6892     | MIR6892  | 22.91692015 | 30.8117667  | 18.95602232 |             |  |
| 24.51900222 |          |             |             |             |             |  |
| MIR6891     | MIR6891  | 423.9630228 | 679.6195398 | 636.6993378 |             |  |
| 1130.816382 |          |             |             |             |             |  |
| SMAD3       | SMAD3    | 1766.686208 | 4936.925362 | 1813.087782 |             |  |
| 2513.688107 |          |             |             |             |             |  |
| POMGNT1     | POMGNT1  | 3764.624974 | 2737.845555 | 2831.137686 |             |  |
| 3462.083113 |          |             |             |             |             |  |
| AMBN        | AMBN     | 0           | 0           | 1.115060136 | 0           |  |
| ICK         | ICK      | 631.2569824 | 1091.616877 | 1136.246279 |             |  |
| 769.8966696 |          |             |             |             |             |  |
| TMEM216     | TMEM216  | 1260.430608 | 903.2249324 | 1696.006467 |             |  |
| 1121.989541 |          |             |             |             |             |  |
| HN1         | HN1      | 14169.9484  | 15294.96099 | 7228.934863 |             |  |
| 8627.7465   |          |             |             |             |             |  |
| SLC25A1     | SLC25A1  | 2739.613636 | 3663.078893 | 3654.052067 |             |  |
| 4196.672419 |          |             |             |             |             |  |

|                 |              |               |             |  |
|-----------------|--------------|---------------|-------------|--|
| ADAMTSL4        | ADAMTSL4     | 12.50013826   | 18.48706002 |  |
| 20.07108245     | 1.961520177  |               |             |  |
| PMS1 PMS1       | 2496.902618  | 2166.507367   | 2136.455221 |  |
| 2561.745352     |              |               |             |  |
| TEX26-AS1       | TEX26-AS1    | 0 0           | 3.345180409 |  |
| 2.942280266     |              |               |             |  |
| PCK2 PCK2       | 5027.138939  | 3867.316889   | 4510.418251 |  |
| 4486.977406     |              |               |             |  |
| PSMD9 PSMD9     | 8621.970368  | 5636.792634   | 5410.271781 |  |
| 5215.682152     |              |               |             |  |
| DYNLT1 DYNLT1   | 3746.916445  | 3405.140388   | 4789.183285 |  |
| 4077.019689     |              |               |             |  |
| LINC00933       | LINC00933    | 17.70852921   | 22.00840479 |  |
| 23.41626286     | 11.76912106  |               |             |  |
| TTN-AS1 TTN-AS1 | 914.5934497  | 717.473996    | 877.5523272 |  |
| 1035.682654     |              |               |             |  |
| AK2 AK2         | 21791.90771  | 17957.97797   | 15790.36659 |  |
| 20143.83146     |              |               |             |  |
| ZC3HAV1L        | ZC3HAV1L     | 288.5448583   | 568.6971797 |  |
| 202.9409448     | 277.5551051  |               |             |  |
| ACY3 ACY3       | 25.00027653  | 12.32470668   | 30.10662368 |  |
| 7.846080709     |              |               |             |  |
| CDKN2AIPNL      | CDKN2AIPNL   | 2265.65006    | 1769.475745 |  |
| 1580.040213     | 1665.330631  |               |             |  |
| MSANTD3 MSANTD3 | 422.9213446  | 492.9882672   | 385.8108071 |  |
| 510.9760062     |              |               |             |  |
| CCDC34 CCDC34   | 520.8390943  | 598.6286102   | 313.3318983 |  |
| 352.0928718     |              |               |             |  |
| ATP6V1E2        | ATP6V1E2     | 27.08363291   | 44.89714576 |  |
| 112.6210738     | 79.44156718  |               |             |  |
| ZNF837 ZNF837   | 150.0016592  | 154.9391697   | 331.1728605 |  |
| 278.5358652     |              |               |             |  |
| EFCAB6-AS1      | EFCAB6-AS1   | 2.083356377   | 0 0 0       |  |
| RNASEH2B-AS1    | RNASEH2B-AS1 | 60.41733494   | 69.54655912 |  |
| 75.82408927     | 47.07648426  |               |             |  |
| SPATA13-AS1     | SPATA13-AS1  | 29.16698928   | 47.53815434 |  |
| 91.43493117     | 53.94180488  |               |             |  |
| PHKG1 PHKG1     | 1295.847667  | 890.0198895   | 1170.813143 |  |
| 871.8957188     |              |               |             |  |
| C14orf178       | C14orf178    | 311.4617784   | 235.0497631 |  |
| 266.4993726     | 293.2472665  |               |             |  |
| MY019 MY019     | 3307.328249  | 2627.803531   | 2953.794301 |  |
| 2808.896894     |              |               |             |  |
| RGPD8 RGPD8     | 301.0449965  | 225.366065    | 284.3403347 |  |
| 280.4973854     |              |               |             |  |
| AQP1 AQP1       | 2.083356377  | 0 0           | 0.980760089 |  |
| SERPINF2        | SERPINF2     | 0 2.641008574 | 3.345180409 |  |
|                 | 4.903800443  |               |             |  |
| PSPN PSPN       | 3.125034566  | 2.641008574   | 4.460240545 |  |
| 4.903800443     |              |               |             |  |

|                 |                                       |                           |               |
|-----------------|---------------------------------------|---------------------------|---------------|
| SERPINB9        | SERPINB9                              | 4711.510447               | 3249.320883   |
| 8393.057646     | 7274.297578                           |                           |               |
| OPRL1 OPRL1     | 16.66685102                           | 33.45277527               | 25.64638313   |
| 21.57672195     |                                       |                           |               |
| SGK2 SGK2       | 0 0.880336191 0                       |                           | 2.942280266   |
| DYNC1I2 DYNC1I2 | 2700.029865                           | 2398.035785               | 2479.893743   |
| 2350.881933     |                                       |                           |               |
| DDX21 DDX21     | 7712.585309                           | 6761.862286               | 8825.700979   |
| 7419.450071     |                                       |                           |               |
| ADIG ADIG       | 0 0.880336191 0                       |                           | 0             |
| SRD5A1 SRD5A1   | 766.6751469                           | 861.8491314               | 555.2999479   |
| 608.071255      |                                       |                           |               |
| CMSS1 CMSS1     | 2365.651167                           | 1610.134894               | 2697.33047    |
| 1937.001175     |                                       |                           |               |
| MFSD10 MFSD10   | 3840.667482                           | 4421.92869                | 3380.862333   |
| 4983.242011     |                                       |                           |               |
| ROCK1 ROCK1     | 6360.48702                            | 7003.954739               | 6526.446978   |
| 6391.613498     |                                       |                           |               |
| MDGA1 MDGA1     | 95.83439336                           | 120.6060582               | 177.2945617   |
| 89.24916807     |                                       |                           |               |
| TEX11 TEX11     | 9.375103698                           | 12.32470668               | 6.690360818   |
| 6.865320621     |                                       |                           |               |
| SNRPD3 SNRPD3   | 8264.674749                           | 8329.741043               | 7590.214348   |
| 7550.871923     |                                       |                           |               |
| PRKAR2B PRKAR2B | 38.54209298                           | 109.1616877               | 82.51445008   |
| 147.1140133     |                                       |                           |               |
| GPD1 GPD1       | 6.250069132                           | 0.880336191               | 0 5.884560532 |
| DNAH6 DNAH6     | 46.87551849                           | 23.76907717               | 56.86806695   |
| 44.13420399     |                                       |                           |               |
| MAX MAX         | 3561.497727                           | 5998.610808               | 7253.466186   |
| 5449.103053     |                                       |                           |               |
| HOXA9 HOXA9     | 0 2.641008574 10.03554123 0.980760089 |                           |               |
| REPS1 REPS1     | 3946.918657                           | 3310.06408                | 3356.33101    |
| 3083.509719     |                                       |                           |               |
| WDR43 WDR43     | 7779.252713                           | 5371.81144                | 8910.445549   |
| 8025.559806     |                                       |                           |               |
| CMTM8 CMTM8     | 132.29313                             | 198.0756431               | 369.0849051   |
| 392.3040355     |                                       |                           |               |
| ZBTB8A ZBTB8A   | 25.00027653                           | 37.85445623               | 0 20.59596186 |
| LILRB4 LILRB4   | 1.041678189                           | 17.60672383               | 0 5.884560532 |
| MRFAP1L1        | MRFAP1L1                              | 5902.148617               | 4139.340772   |
| 6304.55001      | 4947.934647                           |                           |               |
| AASDH AASDH     | 620.8402005                           | 785.2598828               | 589.8668121   |
| 821.8769543     |                                       |                           |               |
| LUCAT1 LUCAT1   | 137.5015209                           | 121.4863944               | 166.1439603   |
| 90.22992816     |                                       |                           |               |
| LOC100129940    | LOC100129940                          | 0 1.760672383 2.230120273 |               |
| 0               |                                       |                           |               |
| GPATCH2L        | GPATCH2L                              | 1683.351953               | 1789.723477   |
| 1444.002876     | 1644.734669                           |                           |               |

|          |          |             |             |             |             |
|----------|----------|-------------|-------------|-------------|-------------|
| CSPG4    | CSPG4    | 4.166712755 | 0           | 12.2656615  | 4.903800443 |
| HIST1H4F | HIST1H4F | 37.91204463 | 30.20866747 | 95.07630868 |             |
| HIST1H4D | HIST1H4D | 16.67292151 | 26.04195472 | 33.45277527 |             |
| POFUT1   | POFUT1   | 16.72590204 | 2904.229096 | 3938.392401 |             |
| MDP1     | MDP1     | 3676.869572 | 915.5496391 | 766.0463136 |             |
| PNP      | PNP      | 968.9909676 | 7476.695274 | 5826.189212 |             |
| ENPEP    | ENPEP    | 7584.217766 | 28.17075813 | 52.4078264  |             |
| MAP7     | MAP7     | 2.942280266 | 223.6053926 | 97.01023186 |             |
| BCLAF1   | BCLAF1   | 242.711018  | 9258.495725 | 13100.84154 |             |
| SP140    | SP140    | 11119.85789 | 3844.428148 | 3181.266569 |             |
| MPHOSPH6 | MPHOSPH6 | 3313.98834  | 3025.03346  | 2284.472417 |             |
| PSME3    | PSME3    | 2342.741346 | 15875.98288 | 14804.65343 |             |
| RAD51B   | RAD51B   | 19885.63662 | 567.8168435 | 706.9481264 |             |
| HLA-B    | HLA-B    | 791.4733916 | 78802.41384 | 67102.08888 |             |
| RANBP9   | RANBP9   | 48367.20166 | 2545.932266 | 1232.141451 |             |
| SMC1A    | SMC1A    | 1152.393104 | 15423.49007 | 14870.44198 |             |
| RAPGEF1  | RAPGEF1  | 12437.01868 | 7245.166856 | 2603.665418 |             |
| SEMA3D   | SEMA3D   | 2442.735353 | 0           | 1.961520177 |             |
| SCUBE3   | SCUBE3   | 3317.91138  | 7.042689532 | 20.07108245 |             |
| ZPBP2    | ZPBP2    | 7.291747321 | 29.05109432 | 17.84096218 |             |
| SYVN1    | SYVN1    | 22.55748204 | 1264.162771 | 1121.750497 |             |
| ATG9B    | ATG9B    | 927.0935879 | 352.1344766 | 670.1511419 |             |
| PNPLA1   | PNPLA1   | 775.0085724 | 0           | 12.2656615  | 0           |
| KRBA1    | KRBA1    | 1.041678189 | 71.30723151 | 68.01866831 |             |
| HPS4     | HPS4     | 22.91692015 | 2206.122496 | 2290.33352  |             |
| OPTN     | OPTN     | 51.9802847  | 7291.824674 | 7257.926427 |             |
| ARPC1B   | ARPC1B   | 6150.346516 | 45828.54145 | 24310.54109 |             |

|                 |              |             |             |   |   |
|-----------------|--------------|-------------|-------------|---|---|
| 40240.58644     |              |             |             |   |   |
| MT1H MT1H       | 7.291747321  | 31.69210289 | 11.15060136 |   |   |
| 34.3266031      |              |             |             |   |   |
| CDC123 CDC123   | 19515.84087  | 12872.27579 | 11986.89646 |   |   |
| 12815.59208     |              |             |             |   |   |
| BTG1 BTG1       | 6083.400622  | 4129.657074 | 28422.88287 |   |   |
| 15364.58755     |              |             |             |   |   |
| SSR4 SSR4       | 5159.432069  | 6054.071989 | 5786.047047 |   |   |
| 5476.564335     |              |             |             |   |   |
| SAP30L-AS1      | SAP30L-AS1   | 118.7513135 | 157.5801783 |   |   |
| 146.0728779     | 95.1337286   |             |             |   |   |
| ZNF625 ZNF625   | 70.83411683  | 72.1875677  | 44.60240545 |   |   |
| 92.19144833     |              |             |             |   |   |
| LOC100506023    | LOC100506023 | 154.1683719 | 93.31563629 |   |   |
| 138.2674569     | 136.3256523  |             |             |   |   |
| ZNF124 ZNF124   | 619.7985223  | 524.6803701 | 640.0445182 |   |   |
| 560.9947707     |              |             |             |   |   |
| CTSH CTSH       | 7108.41196   | 9482.981454 | 3271.58644  |   |   |
| 8468.863366     |              |             |             |   |   |
| NCAN NCAN       | 13.54181645  | 0.880336191 | 1.115060136 |   |   |
| 1.961520177     |              |             |             |   |   |
| ZFR2 ZFR2       | 14.58349464  | 2.641008574 | 44.60240545 |   |   |
| 34.3266031      |              |             |             |   |   |
| PPP3CC PPP3CC   | 6416.737642  | 4434.253396 | 4941.946524 |   |   |
| 3953.443917     |              |             |             |   |   |
| ATG16L1 ATG16L1 | 2893.782008  | 2291.515106 | 2602.550358 |   |   |
| 2186.114238     |              |             |             |   |   |
| RALGAPA2        | RALGAPA2     | 430.2130919 | 940.1990525 |   |   |
| 1096.104114     | 938.5874049  |             |             |   |   |
| C9orf116        | C9orf116     | 9.375103698 | 17.60672383 |   |   |
| 8.92048109      | 12.74988115  |             |             |   |   |
| ALS2CL ALS2CL   | 2.083356377  | 6.16235334  | 100.3554123 |   |   |
| 121.614251      |              |             |             |   |   |
| MTRNR2L6        | MTRNR2L6     | 0           | 3.521344766 | 0 | 0 |
| CYP3A5 CYP3A5   | 39.58377117  | 26.41008574 | 66.90360818 |   |   |
| 20.59596186     |              |             |             |   |   |
| CLSPN CLSPN     | 3774.000078  | 4377.031544 | 2208.93413  |   |   |
| 2274.382646     |              |             |             |   |   |
| OBSL1 OBSL1     | 8.33342551   | 1.760672383 | 3.345180409 |   |   |
| 1.961520177     |              |             |             |   |   |
| TMEM135 TMEM135 | 1222.930194  | 1296.73521  | 780.5420954 |   |   |
| 920.9337233     |              |             |             |   |   |
| CNKS2 CNKS2     | 381.2542171  | 319.5620375 | 793.922817  |   |   |
| 313.8432284     |              |             |             |   |   |
| ATP5SL ATP5SL   | 4957.3465    | 3132.236169 | 3186.841869 |   |   |
| 3297.315418     |              |             |             |   |   |
| SEMA4A SEMA4A   | 1603.142732  | 817.8323218 | 1213.185428 |   |   |
| 1451.524931     |              |             |             |   |   |
| RPL37A RPL37A   | 8408.426339  | 12738.46469 | 11492.92482 |   |   |
| 10677.53509     |              |             |             |   |   |



|              |              |             |             |             |
|--------------|--------------|-------------|-------------|-------------|
| CWC27        | CWC27        | 2567.736735 | 2115.447868 | 2019.373907 |
| 2132.172433  |              |             |             |             |
| CHD8         | CHD8         | 2189.607553 | 4360.305156 | 2589.169636 |
| 2621.571717  |              |             |             |             |
| LOC100129046 | LOC100129046 | 14.58349464 | 14.96571525 |             |
| 4.460240545  | 7.846080709  |             |             |             |
| TOPORS-AS1   | TOPORS-AS1   | 500.0055306 | 663.7734883 |             |
| 663.4607811  | 620.8211361  |             |             |             |
| LINC00535    | LINC00535    | 0           | 0           | 0           |
| MIR497HG     | MIR497HG     | 8058.422468 | 8251.391122 | 2.942280266 |
| 5302.110948  | 5188.220869  |             |             |             |
| RAB11B-AS1   | RAB11B-AS1   | 531.2558762 | 679.6195398 |             |
| 558.6451283  | 560.9947707  |             |             |             |
| GDAP1L1      | GDAP1L1      | 0           | 0.880336191 | 0           |
| TSC22D3      | TSC22D3      | 1417.724015 | 750.0464351 | 2.942280266 |
| 2038.019464  |              |             |             | 4299.671885 |
| TPTE2P5      | TPTE2P5      | 357.2956187 | 298.4339689 | 313.3318983 |
| 404.0731565  |              |             |             |             |
| CLCN5        | CLCN5        | 216.6690632 | 273.7845555 | 208.5162455 |
| 165.748455   |              |             |             |             |
| SLC6A3       | SLC6A3       | 1.041678189 | 0.880336191 | 0           |
| TBC1D10B     | TBC1D10B     | 1355.223324 | 3459.721232 | 0           |
| 1444.002876  | 1550.5817    |             |             |             |
| SARM1        | SARM1        | 894.8015641 | 1280.889159 | 1067.11255  |
| 1142.585503  |              |             |             |             |
| NRG2         | NRG2         | 7.291747321 | 1.760672383 | 1.115060136 |
| 2.942280266  |              |             |             |             |
| RBM38        | RBM38        | 12669.93181 | 9372.059094 | 11977.97598 |
| 11613.18021  |              |             |             |             |
| FBX025       | FBX025       | 1411.473946 | 1272.966133 | 1574.464912 |
| 1356.391203  |              |             |             |             |
| PPP3CB       | PPP3CB       | 826.0508036 | 1314.341934 | 594.3270526 |
| 547.2641295  |              |             |             |             |
| B3GNTL1      | B3GNTL1      | 420.8379882 | 733.3200475 | 425.9529721 |
| 831.6845552  |              |             |             |             |
| OXSM         | OXSM         | 1506.266661 | 1287.051512 | 1176.388444 |
| 1483.890014  |              |             |             |             |
| WDR13        | WDR13        | 1862.520601 | 1382.127821 | 1360.373366 |
| 1496.639895  |              |             |             |             |
| NRXN2        | NRXN2        | 0           | 1.115060136 | 0           |
| RBM48        | RBM48        | 1826.061865 | 1307.299244 | 2002.648005 |
| 1664.34987   |              |             |             |             |
| WDR54        | WDR54        | 3581.289613 | 4141.981781 | 2173.252206 |
| 3965.213038  |              |             |             |             |
| WDR74        | WDR74        | 4101.087029 | 2247.498297 | 4512.648371 |
| 3887.732991  |              |             |             |             |
| EPHX2        | EPHX2        | 358.3372969 | 360.0575023 | 868.6318462 |
| 953.2988062  |              |             |             |             |
| KLC4         | KLC4         | 290.6282146 | 415.5186824 | 578.7162107 |
| 452.1304009  |              |             |             |             |

|             |             |             |             |             |             |
|-------------|-------------|-------------|-------------|-------------|-------------|
| ABHD3       | ABHD3       | 5344.850786 | 3756.394529 | 3269.35632  |             |
| 2502.899746 |             |             |             |             |             |
| POLR3H      | POLR3H      | 9763.649663 | 7121.919789 | 7486.513755 |             |
| 8521.82441  |             |             |             |             |             |
| JOSD2       | JOSD2       | 701.049421  | 748.2857627 | 462.7499566 |             |
| 596.3021339 |             |             |             |             |             |
| ZNF675      | ZNF675      | 1005.219452 | 1021.189982 | 1848.769706 |             |
| 1337.756761 |             |             |             |             |             |
| MAGED4B     | MAGED4B     | 0           | 0           | 2.942280266 |             |
|             |             |             |             |             |             |
| RHBDL3      | RHBDL3      | 1.041678189 | 7.923025723 | 0           | 12.74988115 |
| COX14       | COX14       | 3700.040926 | 3326.790467 | 3913.861078 |             |
| 2864.800219 |             |             |             |             |             |
| MFSD5       | MFSD5       | 5003.18034  | 3212.346763 | 4262.874901 |             |
| 3868.11779  |             |             |             |             |             |
| RNF25       | RNF25       | 1735.435862 | 1138.274696 | 1816.432962 |             |
| 1428.967449 |             |             |             |             |             |
| TIGD5       | TIGD5       | 39.58377117 | 169.0245488 | 99.24035213 |             |
| 77.480047   |             |             |             |             |             |
| ACOX1       | ACOX1       | 2736.488602 | 2893.665061 | 2072.896793 |             |
| 2441.111861 |             |             |             |             |             |
| NMD3        | NMD3        | 4880.262314 | 3518.703757 | 4445.744763 |             |
| 4237.864343 |             |             |             |             |             |
| PPP6R3      | PPP6R3      | 6159.44313  | 6409.72781  | 5280.924805 |             |
| 4906.742724 |             |             |             |             |             |
| SUSD2       | SUSD2       | 7.291747321 | 3.521344766 | 0           | 6.865320621 |
| SPRYD7      | SPRYD7      | 825.0091254 | 443.6894405 | 651.1951196 |             |
| 660.0515397 |             |             |             |             |             |
| EEF2        | EEF2        | 10066.77802 | 18036.32789 | 12169.76633 |             |
| 10644.18924 |             |             |             |             |             |
| INTS8       | INTS8       | 6574.031049 | 5245.923365 | 4229.423097 |             |
| 5097.010181 |             |             |             |             |             |
| GNPDA2      | GNPDA2      | 1516.683443 | 1221.906634 | 1718.30767  |             |
| 1401.506167 |             |             |             |             |             |
| PNOC        | PNOC        | 2.083356377 | 7.923025723 | 0           | 38.24964346 |
| ECHDC3      | ECHDC3      | 23.95859834 | 35.21344766 | 208.5162455 |             |
| 159.8638945 |             |             |             |             |             |
| TGS1        | TGS1        | 1897.93766  | 2000.123827 | 2250.191355 |             |
| 2255.748204 |             |             |             |             |             |
| TLCD1       | TLCD1       | 240.6276616 | 113.5633687 | 519.6180235 |             |
| 257.9399033 |             |             |             |             |             |
| NWD2        | NWD2        | 0           | 0           | 3.923040355 |             |
|             |             |             |             |             |             |
| BEGAIN      | BEGAIN      | 12.50013826 | 16.72638764 | 37.91204463 |             |
| 46.09572417 |             |             |             |             |             |
| PPIP5K1     | PPIP5K1     | 726.0496975 | 1123.30898  | 783.8872758 |             |
| 1002.336811 |             |             |             |             |             |
| WDR27       | WDR27       | 172.9185793 | 217.4430393 | 253.1186509 |             |
| 203.9980984 |             |             |             |             |             |
| ZNF177      | ZNF177      | 30.20866747 | 21.12806859 | 180.6397421 |             |
| 17.6536816  |             |             |             |             |             |
| IQCJ-SCHIP1 | IQCJ-SCHIP1 |             | 6.250069132 | 14.96571525 | 0           |

|            |            |             |             |             |             |
|------------|------------|-------------|-------------|-------------|-------------|
|            |            | 13.73064124 |             |             |             |
| SCAMP5     | SCAMP5     | 1.041678189 | 21.12806859 | 5.575300681 |             |
|            |            | 3.923040355 |             |             |             |
| HCFC1R1    | HCFC1R1    | 1453.141073 | 1338.991347 | 864.1716056 |             |
|            |            | 1096.489779 |             |             |             |
| EHBP1      | EHBP1      | 810.4256308 | 696.3459274 | 1050.386648 |             |
|            |            | 928.779804  |             |             |             |
| KLKB1      | KLKB1      | 0           | 6.16235334  | 0           | 15.69216142 |
| NOX01      | NOX01      | 15.62517283 | 22.00840479 | 46.83252572 |             |
|            |            | 1.961520177 |             |             |             |
| ECHS1      | ECHS1      | 7300.080746 | 4752.054761 | 5927.659684 |             |
|            |            | 5894.368133 |             |             |             |
| SKIV2L     | SKIV2L     | 0           | 0           | 1.115060136 | 0           |
| SOX10      | SOX10      | 0           | 0           | 5.575300681 | 0           |
| SUM02      | SUM02      | 16849.1447  | 16212.2713  | 16817.33698 |             |
|            |            | 14186.69468 |             |             |             |
| CORT       | CORT       | 131.2514518 | 136.4521097 | 53.52288654 |             |
|            |            | 54.92256497 |             |             |             |
| FAM210B    | FAM210B    | 208.3356377 | 249.1351422 | 757.1258325 |             |
|            |            | 804.2232727 |             |             |             |
| MYL9       | MYL9       | 9.375103698 | 25.52974955 | 4.460240545 |             |
|            |            | 20.59596186 |             |             |             |
| PLTP       | PLTP       | 1338.556472 | 1131.232006 | 1231.02639  |             |
|            |            | 1413.275288 |             |             |             |
| TRIP12     | TRIP12     | 8331.342153 | 16788.89151 | 8650.636537 |             |
|            |            | 10344.07666 |             |             |             |
| PIGF       | PIGF       | 1825.020187 | 1441.110345 | 1437.312516 |             |
|            |            | 1325.98764  |             |             |             |
| IFNLR1     | IFNLR1     | 130.2097736 | 179.5885831 | 428.1830923 |             |
|            |            | 160.8446545 |             |             |             |
| SHISA4     | SHISA4     | 30.20866747 | 29.05109432 | 10.03554123 |             |
|            |            | 30.40356275 |             |             |             |
| ABHD15     | ABHD15     | 754.1750086 | 1274.726805 | 731.4794494 |             |
|            |            | 1071.970777 |             |             |             |
| CATSPER4   | CATSPER4   |             | 1.041678189 | 0           | 1.115060136 |
|            |            | 0.980760089 |             |             |             |
| PSIP1      | PSIP1      | 5560.478171 | 6207.250486 | 8407.553427 |             |
|            |            | 7581.275485 |             |             |             |
| MEGF9      | MEGF9      | 511.4639907 | 995.6602325 | 656.7704203 |             |
|            |            | 628.6672168 |             |             |             |
| TMEM150C   | TMEM150C   |             | 4.166712755 | 9.683698106 |             |
|            |            | 12.2656615  | 10.78836098 |             |             |
| HSPE1      | HSPE1      | 14131.40631 | 12129.27205 | 15425.74193 |             |
|            |            | 14622.15216 |             |             |             |
| SFTA2      | SFTA2      | 1.041678189 | 0           | 0           | 0           |
| RNF38      | RNF38      | 2396.901512 | 2490.471086 | 3776.708682 |             |
|            |            | 2733.378367 |             |             |             |
| IL27       | IL27       | 0           | 7.923025723 | 0           | 0.980760089 |
| CDKN2B-AS1 | CDKN2B-AS1 |             | 85.41761147 | 46.65781815 |             |
|            |            | 26.76144327 | 18.63444168 |             |             |

|             |          |             |             |             |
|-------------|----------|-------------|-------------|-------------|
| SCAF8       | SCAF8    | 1769.811243 | 2402.437466 | 2439.751578 |
| 2039.000224 |          |             |             |             |
| IDH3G       | IDH3G    | 5668.812703 | 4728.285684 | 3704.229773 |
| 4403.612798 |          |             |             |             |
| 3-Sep       | 3-Sep    | 86.45928966 | 250.8958146 | 66.90360818 |
| 96.11448869 |          |             |             |             |
| DNMT3B      | DNMT3B   | 85.41761147 | 229.767746  | 17.84096218 |
| 141.2294528 |          |             |             |             |
| MYZAP       | MYZAP    | 0           | 11.44437049 | 64.6734879  |
|             |          |             |             | 0.980760089 |
| SPDEF       | SPDEF    | 0           | 2.641008574 | 0           |
|             |          |             |             | 0           |
| MRPL35      | MRPL35   | 6079.233909 | 4934.284353 | 4684.367632 |
| 4815.532035 |          |             |             |             |
| KANSL3      | KANSL3   | 4254.213723 | 4922.839983 | 4398.912238 |
| 3543.4862   |          |             |             |             |
| ATP6V1G3    | ATP6V1G3 |             | 2.083356377 | 0           |
|             |          |             |             | 0           |
| 0.980760089 |          |             |             |             |
| PHF10       | PHF10    | 1875.02074  | 1864.552053 | 1723.882971 |
| 1836.963646 |          |             |             |             |
| COMMD1      | COMMD1   | 2033.355824 | 1913.85088  | 1588.960694 |
| 1693.772673 |          |             |             |             |
| MEI1        | MEI1     | 2526.069608 | 2002.764836 | 2097.428116 |
| 2303.805448 |          |             |             |             |
| WDR90       | WDR90    | 381.2542171 | 961.327121  | 370.1999652 |
| 844.4344363 |          |             |             |             |
| TTY10       | TTY10    | 0           | 2.641008574 | 0           |
|             |          |             |             | 8.826840798 |
| FIZ1        | FIZ1     | 423.9630228 | 467.4585177 | 409.22707   |
| 447.2266004 |          |             |             |             |
| BOLA2       | BOLA2    | 531.2558762 | 691.0639103 | 333.4029807 |
| 626.7056967 |          |             |             |             |
| EPSTI1      | EPSTI1   | 3750.041479 | 1720.176918 | 6634.607811 |
| 2126.287872 |          |             |             |             |
| L1CAM       | L1CAM    | 81.25089872 | 94.19597248 | 26.76144327 |
| 36.28812328 |          |             |             |             |
| TGM1        | TGM1     | 9.375103698 | 9.683698106 | 31.22168382 |
| 12.74988115 |          |             |             |             |
| CSTF1       | CSTF1    | 5351.100855 | 4450.099448 | 3929.47192  |
| 4351.632513 |          |             |             |             |
| PTGER2      | PTGER2   | 5192.765771 | 2084.636101 | 3607.219541 |
| 1192.604268 |          |             |             |             |
| PTGER1      | PTGER1   | 3.125034566 | 14.08537906 | 0           |
|             |          |             |             | 5.884560532 |
| TXN         | TXN      | 28260.72926 | 24797.30984 | 25161.33197 |
| 18620.71104 |          |             |             |             |
| TNFRSF4     | TNFRSF4  | 9738.649386 | 9409.033214 | 7061.675843 |
| 14209.25216 |          |             |             |             |
| SPN         | SPN      | 9776.149801 | 10134.43024 | 3877.064094 |
| 4575.245814 |          |             |             |             |
| SESN1       | SESN1    | 1433.349188 | 791.4222361 | 3262.665959 |
| 1640.811628 |          |             |             |             |
| SIAE        | SIAE     | 637.5070515 | 667.2948331 | 464.9800768 |
| 819.9154341 |          |             |             |             |

|         |         |             |             |             |             |
|---------|---------|-------------|-------------|-------------|-------------|
| LAMC2   | LAMC2   | 2.083356377 | 1.760672383 | 0           | 52.96104479 |
| HMGCS2  | HMGCS2  | 0           | 0           | 5.884560532 |             |
| HLA-E   | HLA-E   | 2.083356377 | 5.282017149 | 3.345180409 |             |
|         |         | 12.74988115 |             |             |             |
| MNX1    | MNX1    | 1.041678189 | 2.641008574 | 0           | 0.980760089 |
| GAS8    | GAS8    | 147.9183028 | 117.0847135 | 194.0204637 |             |
|         |         | 383.4771947 |             |             |             |
| KXD1    | KXD1    | 7081.328327 | 5756.518356 | 4911.8399   |             |
|         |         | 5288.258398 |             |             |             |
| OTULIN  | OTULIN  | 4314.631058 | 3767.838899 | 3297.232823 |             |
|         |         | 3044.279315 |             |             |             |
| DIS3L   | DIS3L   | 3280.244616 | 3201.782728 | 2581.364215 |             |
|         |         | 3132.547723 |             |             |             |
| ST6GAL1 | ST6GAL1 | 6672.990477 | 7636.916461 | 12145.235   |             |
|         |         | 10859.95646 |             |             |             |
| INTS12  | INTS12  | 1837.520325 | 1375.965467 | 1679.280565 |             |
|         |         | 1618.254146 |             |             |             |
| ZNF695  | ZNF695  | 28.12531109 | 88.91395534 | 34.56686422 |             |
|         |         | 16.67292151 |             |             |             |
| CTDSPL  | CTDSPL  | 12.50013826 | 65.14487817 | 44.60240545 |             |
|         |         | 34.3266031  |             |             |             |
| NUTF2   | NUTF2   | 10494.90775 | 9828.073241 | 7810.996255 |             |
|         |         | 9190.702791 |             |             |             |
| TCEB2   | TCEB2   | 7745.919011 | 8280.442217 | 6355.842777 |             |
|         |         | 6283.729888 |             |             |             |
| CLTB    | CLTB    | 5314.642119 | 4006.410007 | 3464.491843 |             |
|         |         | 3737.676698 |             |             |             |
| CDCP1   | CDCP1   | 58.33397857 | 34.33311147 | 146.0728779 |             |
|         |         | 8.826840798 |             |             |             |
| MPZL3   | MPZL3   | 4245.880297 | 3634.027798 | 4163.634549 |             |
|         |         | 4251.594984 |             |             |             |
| CLPX    | CLPX    | 2402.109903 | 2207.883168 | 2494.389525 |             |
|         |         | 2451.900222 |             |             |             |
| FAM216A | FAM216A | 1239.597045 | 1195.496548 | 1157.432421 |             |
|         |         | 1631.004027 |             |             |             |
| DNAJB6  | DNAJB6  | 10154.27898 | 8644.9014   | 10696.77189 |             |
|         |         | 9632.044831 |             |             |             |
| CCDC71  | CCDC71  | 27.08363291 | 73.06790389 | 61.32830749 |             |
|         |         | 27.46128248 |             |             |             |
| WBSCR22 | WBSCR22 | 6489.655116 | 4405.202302 | 6310.125311 |             |
|         |         | 5570.717304 |             |             |             |
| LRRC19  | LRRC19  | 3.125034566 | 5.282017149 | 11.15060136 |             |
|         |         | 0.980760089 |             |             |             |
| CASD1   | CASD1   | 990.6359575 | 1719.296582 | 1207.610128 |             |
|         |         | 1366.198804 |             |             |             |
| SIRT3   | SIRT3   | 1023.969659 | 969.2501468 | 1126.210738 |             |
|         |         | 1127.874102 |             |             |             |
| RNF141  | RNF141  | 1191.679848 | 1110.984274 | 1711.617309 |             |
|         |         | 1543.71638  |             |             |             |
| ZNF623  | ZNF623  | 510.4223125 | 578.3808778 | 908.7740111 |             |

|                           |               |               |               |  |
|---------------------------|---------------|---------------|---------------|--|
| 874.8379991               |               |               |               |  |
| PRAF2 PRAF2               | 1236.47201    | 1412.939587   | 1067.11255    |  |
| 1070.009257               |               |               |               |  |
| RNF2 RNF2                 | 1716.685655   | 1259.76109    | 2280.297979   |  |
| 1636.888588               |               |               |               |  |
| CLASRP CLASRP             | 373.9624697   | 893.5412343   | 490.62646     |  |
| 542.360329                |               |               |               |  |
| ADRA1A ADRA1A             | 0 0           | 0 0.980760089 |               |  |
| MTMR10 MTMR10             | 1095.845455   | 1398.854208   | 1488.605282   |  |
| 1348.545122               |               |               |               |  |
| MIA2 MIA2                 | 4.166712755   | 1.760672383   | 0 1.961520177 |  |
| DBN1 DBN1                 | 258.3361908   | 648.8077731   | 645.6198189   |  |
| 607.0904949               |               |               |               |  |
| RAB40A RAB40A             | 0 3.521344766 | 0             | 1.961520177   |  |
| PSAT1 PSAT1               | 9859.484056   | 8244.348433   | 11804.0266    |  |
| 6680.937724               |               |               |               |  |
| ANGPTL7 ANGPTL7           | 0 0.880336191 | 0             | 1.961520177   |  |
| CCNYL1 CCNYL1             | 105.2094971   | 290.5109432   | 177.2945617   |  |
| 132.402612                |               |               |               |  |
| KNSTRN KNSTRN             | 3970.877255   | 3157.765919   | 2078.472094   |  |
| 2571.552952               |               |               |               |  |
| ZNF610 ZNF610             | 54.16726581   | 88.03361914   | 302.1812969   |  |
| 220.67102                 |               |               |               |  |
| NDFIP2 NDFIP2             | 13785.56915   | 7390.422327   | 9297.371416   |  |
| 12488.01821               |               |               |               |  |
| TOMM34 TOMM34             | 6881.326115   | 4307.484985   | 5768.206085   |  |
| 5814.926566               |               |               |               |  |
| LOC101929613 LOC101929613 | 4.460240545   | 2.083356377   | 1.760672383   |  |
| 4.460240545               | 0             |               |               |  |
| GMPR GMPR                 | 460.4217594   | 155.8195059   | 277.6499739   |  |
| 77.480047                 |               |               |               |  |
| PRKD2 PRKD2               | 3824.000631   | 3531.9088     | 4815.944729   |  |
| 3388.526106               |               |               |               |  |
| INPP4B INPP4B             | 2706.279934   | 3420.106104   | 4572.861619   |  |
| 5900.252693               |               |               |               |  |
| ATG9A ATG9A               | 5069.847744   | 5192.222857   | 3790.089403   |  |
| 4924.396405               |               |               |               |  |
| NR3C2 NR3C2               | 19.79188559   | 31.69210289   | 228.5873279   |  |
| 104.9413295               |               |               |               |  |
| KCNJ2 KCNJ2               | 1.041678189   | 0.880336191   | 1.115060136   |  |
| 8.826840798               |               |               |               |  |
| MGP MGP                   | 4.166712755   | 8.803361914   | 5.575300681   |  |
| 14.71140133               |               |               |               |  |
| RPL39 RPL39               | 3739.624697   | 5164.932435   | 6885.496341   |  |
| 5366.719205               |               |               |               |  |
| NAPG NAPG                 | 3123.992888   | 2440.291923   | 1872.185969   |  |
| 2161.595235               |               |               |               |  |
| MED26 MED26               | 456.2550466   | 753.5677799   | 492.8565802   |  |
| 438.3997596               |               |               |               |  |
| PHPT1 PHPT1               | 6240.694028   | 4426.330371   | 4514.878492   |  |

|                 |                 |             |               |  |
|-----------------|-----------------|-------------|---------------|--|
| 3100.18264      |                 |             |               |  |
| ACTG1 ACTG1     | 344918.3985     | 238743.6538 | 182600.0178   |  |
| 228981.9809     |                 |             |               |  |
| NPPA-AS1        | NPPA-AS1        | 32.29202385 | 68.66622293   |  |
| 161.6837198     | 102.9798093     |             |               |  |
| ZNF321P ZNF321P | 85.41761147     | 84.51227438 | 221.8969671   |  |
| 117.6912106     |                 |             |               |  |
| PRKCQ-AS1       | PRKCQ-AS1       | 1962.521708 | 1892.722812   |  |
| 3034.078631     | 2545.07243      |             |               |  |
| ZNF625-ZNF20    | ZNF625-ZNF20    | 332.2953422 | 321.3227099   |  |
| 370.1999652     | 346.2083113     |             |               |  |
| RNASEK RNASEK   | 9380.312089     | 11849.32514 | 8819.010618   |  |
| 6819.224897     |                 |             |               |  |
| RAB4B-EGLN2     | RAB4B-EGLN2     | 7109.453638 | 7231.081476   |  |
| 7738.517346     | 7672.486174     |             |               |  |
| USH1C USH1C     | 0 0             | 14.49578177 | 0             |  |
| AKAP8 AKAP8     | 3115.659462     | 3018.6728   | 2874.625031   |  |
| 3146.278364     |                 |             |               |  |
| GJB7 GJB7       | 13.54181645     | 1.760672383 | 0 0.980760089 |  |
| C3orf62 C3orf62 | 111.4595662     | 134.6914373 | 112.6210738   |  |
| 114.7489304     |                 |             |               |  |
| DOK6 DOK6       | 59.37565676     | 382.0659071 | 26.76144327   |  |
| 441.3420399     |                 |             |               |  |
| WDR5 WDR5       | 4574.008927     | 3924.538741 | 4113.456843   |  |
| 3720.023016     |                 |             |               |  |
| STAT3 STAT3     | 16234.55457     | 16404.18459 | 26492.71378   |  |
| 31039.09529     |                 |             |               |  |
| CEPT1 CEPT1     | 2153.148816     | 2075.832739 | 2838.943107   |  |
| 2423.458179     |                 |             |               |  |
| RUNX1 RUNX1     | 891.6765295     | 1147.078057 | 1697.121527   |  |
| 1363.256523     |                 |             |               |  |
| RPH3A RPH3A     | 0 0.880336191 0 | 0           | 0             |  |
| ARL13B ARL13B   | 651.0488679     | 641.7650836 | 657.8854804   |  |
| 565.8985712     |                 |             |               |  |
| HK2 HK2         | 2641.695887     | 3161.287263 | 2747.508176   |  |
| 4700.783105     |                 |             |               |  |
| GAA GAA         | 1013.552878     | 1065.206792 | 1002.439063   |  |
| 1578.042983     |                 |             |               |  |
| ZNF268 ZNF268   | 2032.314146     | 1828.45827  | 2688.409989   |  |
| 1794.790962     |                 |             |               |  |
| IRF6 IRF6       | 6.250069132     | 10.5640343  | 41.25722504   |  |
| 4.903800443     |                 |             |               |  |
| ABCA2 ABCA2     | 85.41761147     | 1028.232672 | 205.1710651   |  |
| 308.9394279     |                 |             |               |  |
| RASAL3 RASAL3   | 12556.38889     | 14225.35252 | 7027.108979   |  |
| 11486.66216     |                 |             |               |  |
| UXS1 UXS1       | 5257.349818     | 3672.762591 | 3575.997857   |  |
| 3503.275037     |                 |             |               |  |
| NLRP7 NLRP7     | 6.250069132     | 6.16235334  | 7.805420954   |  |
| 4.903800443     |                 |             |               |  |

|              |              |             |             |             |             |
|--------------|--------------|-------------|-------------|-------------|-------------|
| HPRT1        | HPRT1        | 8728.221543 | 9217.119924 | 6185.238576 |             |
| 7685.236055  |              |             |             |             |             |
| TXLNA        | TXLNA        | 12231.38529 | 12846.74604 | 9936.300874 |             |
| 11561.19993  |              |             |             |             |             |
| RCE1         | RCE1         | 1867.728992 | 1374.204795 | 1412.781193 |             |
| 1667.292151  |              |             |             |             |             |
| DOPEY2       | DOPEY2       | 589.5898548 | 990.3782154 | 772.7366744 |             |
| 703.2049836  |              |             |             |             |             |
| WDR70        | WDR70        | 1896.895982 | 1668.237083 | 1476.33962  |             |
| 1767.32968   |              |             |             |             |             |
| UBAP1L       | UBAP1L       | 7.291747321 | 13.20504287 | 25.64638313 |             |
| 14.71140133  |              |             |             |             |             |
| COX5B        | COX5B        | 9981.360404 | 10187.25041 | 7989.405876 |             |
| 8147.174057  |              |             |             |             |             |
| GALC         | GALC         | 1587.51756  | 1722.817927 | 1310.19566  |             |
| 1655.52303   |              |             |             |             |             |
| TYMS         | TYMS         | 20808.5635  | 23719.77834 | 11955.67478 |             |
| 16081.52317  |              |             |             |             |             |
| TUBG1        | TUBG1        | 11615.75348 | 7611.386711 | 7020.418618 |             |
| 7393.950308  |              |             |             |             |             |
| CCDC68       | CCDC68       | 3.125034566 | 7.042689532 | 0           | 3.923040355 |
| CLDN12       | CLDN12       | 164.5851538 | 187.5116088 | 148.3029981 |             |
| 189.2866971  |              |             |             |             |             |
| TGFBR1       | TGFBR1       | 3046.908702 | 1803.808856 | 3241.479816 |             |
| 2452.880982  |              |             |             |             |             |
| CLCF1        | CLCF1        | 39.58377117 | 8.803361914 | 57.98312709 |             |
| 93.17220842  |              |             |             |             |             |
| RAB29        | RAB29        | 6133.401175 | 4435.133732 | 4714.474256 |             |
| 4509.534888  |              |             |             |             |             |
| CPEB2        | CPEB2        | 352.0872278 | 418.1596909 | 366.8547848 |             |
| 301.0933472  |              |             |             |             |             |
| FIRRE        | FIRRE        | 142.7099119 | 139.9734544 | 86.97469063 |             |
| 139.2679326  |              |             |             |             |             |
| ZSCAN32      | ZSCAN32      | 1329.181369 | 1102.180912 | 2022.719087 |             |
| 1446.621131  |              |             |             |             |             |
| HAUS1        | HAUS1        | 3630.248488 | 3435.952155 | 2407.414834 |             |
| 2707.878605  |              |             |             |             |             |
| TMEM161B     | TMEM161B     |             | 1092.72042  | 1119.787636 |             |
| 1167.467963  | 942.5104452  |             |             |             |             |
| LOC101929234 | LOC101929234 |             | 0           | 0.880336191 | 0           |
| LOC101928103 | LOC101928103 |             | 48.95887487 | 22.88874098 | 0           |
| 59.09818722  | 38.24964346  |             |             |             |             |
| UBE2L6       | UBE2L6       | 18255.41026 | 11934.71775 | 26376.74752 |             |
| 14264.17473  |              |             |             |             |             |
| KCTD13       | KCTD13       | 765.6334687 | 660.2521436 | 596.5571729 |             |
| 818.934674   |              |             |             |             |             |
| C14orf159    | C14orf159    |             | 2857.323272 | 3085.578351 |             |
| 2859.014189  | 2953.068627  |             |             |             |             |
| TPRG1L       | TPRG1L       | 412.5045627 | 818.712658  | 1141.82158  |             |
| 682.6090217  |              |             |             |             |             |



|             |             |             |             |             |
|-------------|-------------|-------------|-------------|-------------|
| NANP        | NANP        | 848.9677238 | 791.4222361 | 743.7451109 |
| 827.7615148 |             |             |             |             |
| ZNF12       | ZNF12       | 2143.773712 | 2558.256972 | 3493.483407 |
| 3181.585728 |             |             |             |             |
| IKZF2       | IKZF2       | 403.129459  | 512.3556634 | 305.5264773 |
| 558.0524905 |             |             |             |             |
| HPCAL4      | HPCAL4      | 100.0011061 | 20.2477324  | 246.4282901 |
| 121.614251  |             |             |             |             |
| MME         | MME         | 0           | 19.36739621 | 0           |
| 14.71140133 |             |             |             |             |
| RPS27L      | RPS27L      | 11639.71208 | 7526.874437 | 10908.63331 |
| 5654.081911 |             |             |             |             |
| CD93        | CD93        | 5.208390943 | 54.58084387 | 0           |
| 16.67292151 |             |             |             |             |
| FEN1        | FEN1        | 20247.09895 | 17838.25225 | 10838.38452 |
| 13905.21654 |             |             |             |             |
| LSM11       | LSM11       | 325.0035949 | 283.4682536 | 362.3945443 |
| 254.9976231 |             |             |             |             |
| WTAP        | WTAP        | 6577.156083 | 6894.793051 | 6052.54642  |
| 5385.353647 |             |             |             |             |
| IGLL1       | IGLL1       | 8.33342551  | 14.08537906 | 0           |
| 15.69216142 |             |             |             |             |
| ZDHHC16     | ZDHHC16     | 6387.570653 | 4418.407345 | 4066.624317 |
| 5462.833694 |             |             |             |             |
| NUDT6       | NUDT6       | 337.5037331 | 395.27095   | 205.1710651 |
| 222.6325401 |             |             |             |             |
| YEATS2      | YEATS2      | 1463.557855 | 3030.117171 | 2084.047395 |
| 1935.039655 |             |             |             |             |
| SNORA59A    | SNORA59A    |             | 4.166712755 | 4.401680957 |
| 5.575300681 | 4.903800443 |             |             |             |
| LOC606724   | LOC606724   |             | 9982.402082 | 9755.885674 |
| 3956.233363 | 6932.993067 |             |             |             |
| SNORA66     | SNORA66     | 19.79188559 | 9.683698106 | 23.41626286 |
| 15.69216142 |             |             |             |             |
| SNORA71D    | SNORA71D    |             | 47.91719668 | 51.93983529 |
| 52.4078264  | 40.21116364 |             |             |             |
| SNORA71C    | SNORA71C    |             | 12.50013826 | 26.41008574 |
| 21.18614259 | 16.67292151 |             |             |             |
| AUH         | AUH         | 2096.898194 | 1315.22227  | 1472.99444  |
| 1704.561034 |             |             |             |             |
| ATRNL1      | ATRNL1      | 165.626832  | 14.96571525 | 23.41626286 |
| 3.923040355 |             |             |             |             |
| AAGAB       | AAGAB       | 7116.745385 | 5548.759015 | 6385.9494   |
| 5326.508042 |             |             |             |             |
| MYP0P       | MYP0P       | 5.208390943 | 29.05109432 | 7.805420954 |
| 7.846080709 |             |             |             |             |
| SEMA3A      | SEMA3A      | 25.00027653 | 5.282017149 | 20.07108245 |
| 9.807600887 |             |             |             |             |
| CAMTA2      | CAMTA2      | 1339.598151 | 2640.128238 | 1643.598641 |
| 2102.74963  |             |             |             |             |
| CD244       | CD244       | 60.41733494 | 351.2541404 | 99.24035213 |
| 114.7489304 |             |             |             |             |
| TCF4        | TCF4        | 48.95887487 | 578.3808778 | 68.01866831 |

|                 |             |             |             |   |  |
|-----------------|-------------|-------------|-------------|---|--|
| 103.9605694     |             |             |             |   |  |
| SEN7 SEN7       | 618.7568441 | 906.7462772 | 941.110755  |   |  |
| 1070.009257     |             |             |             |   |  |
| ASAP1-IT1       | ASAP1-IT1   | 0           | 3.521344766 | 0 |  |
| 3.923040355     |             |             |             |   |  |
| DLEU2 DLEU2     | 846.8843674 | 718.3543322 | 630.008977  |   |  |
| 688.4935822     |             |             |             |   |  |
| LYSMD4 LYSMD4   | 630.2153042 | 838.9603904 | 718.0987278 |   |  |
| 802.2617525     |             |             |             |   |  |
| COMMD4 COMMD4   | 2986.491367 | 2807.392114 | 1643.598641 |   |  |
| 2139.037753     |             |             |             |   |  |
| GCOM1 GCOM1     | 2884.406905 | 3141.039531 | 4278.485743 |   |  |
| 3644.504489     |             |             |             |   |  |
| SNORA15 SNORA15 | 7.291747321 | 0.880336191 | 14.49578177 |   |  |
| 5.884560532     |             |             |             |   |  |
| SNORA12 SNORA12 | 11.45846008 | 26.41008574 | 24.531323   |   |  |
| 3.923040355     |             |             |             |   |  |
| NVL NVL         | 3546.914233 | 2417.403182 | 2108.578718 |   |  |
| 2465.630863     |             |             |             |   |  |
| SNORA17 SNORA17 | 17.70852921 | 14.08537906 | 20.07108245 |   |  |
| 30.40356275     |             |             |             |   |  |
| SNORD17 SNORD17 | 173.9602575 | 123.2470668 | 79.16926967 |   |  |
| 96.11448869     |             |             |             |   |  |
| SUM01P3 SUM01P3 | 36.4587366  | 31.69210289 | 40.14216491 |   |  |
| 21.57672195     |             |             |             |   |  |
| PIM1 PIM1       | 19370.00592 | 19961.62314 | 9278.415394 |   |  |
| 9450.604214     |             |             |             |   |  |
| ATP7B ATP7B     | 42.70880574 | 77.46958485 | 41.25722504 |   |  |
| 66.69168603     |             |             |             |   |  |
| CA13 CA13       | 6.250069132 | 16.72638764 | 27.87650341 |   |  |
| 50.99952461     |             |             |             |   |  |
| ARHGDIB ARHGDIB | 127835.789  | 107356.9985 | 52366.56918 |   |  |
| 67683.23448     |             |             |             |   |  |
| HSPA13 HSPA13   | 4081.295143 | 3973.837568 | 4649.800768 |   |  |
| 3230.623732     |             |             |             |   |  |
| PRB3 PRB3       | 6.250069132 | 3.521344766 | 1.115060136 | 0 |  |
| SRP72 SRP72     | 11747.00493 | 8478.51786  | 9389.921407 |   |  |
| 8775.841273     |             |             |             |   |  |
| RPUSD4 RPUSD4   | 2079.189665 | 1241.27403  | 2308.174482 |   |  |
| 1556.466261     |             |             |             |   |  |
| NUTM2B-AS1      | NUTM2B-AS1  | 1015.636234 | 1000.94225  |   |  |
| 925.4999131     | 908.1838421 |             |             |   |  |
| ASPHD2 ASPHD2   | 3081.284082 | 1848.706002 | 1612.376957 |   |  |
| 1493.697615     |             |             |             |   |  |
| SALL4 SALL4     | 8.33342551  | 2.641008574 | 0           | 0 |  |
| GJC2 GJC2       | 0           | 3.521344766 | 1.115060136 | 0 |  |
| GALNT11 GALNT11 | 1881.270809 | 1573.160774 | 1688.201046 |   |  |
| 1917.385973     |             |             |             |   |  |
| CAND2 CAND2     | 17.70852921 | 29.05109432 | 51.29276627 |   |  |
| 109.8451299     |             |             |             |   |  |

|             |             |             |             |             |             |
|-------------|-------------|-------------|-------------|-------------|-------------|
| CH25H       | CH25H       | 5.208390943 | 0           | 32.33674395 | 5.884560532 |
| SEC61B      | SEC61B      | 9431.35432  | 8447.706093 | 7634.816753 |             |
| 6239.595684 |             |             |             |             |             |
| NEURL3      | NEURL3      | 122.9180263 | 109.1616877 | 54.63794668 |             |
| 150.0562936 |             |             |             |             |             |
| SLC37A4     | SLC37A4     | 1721.894046 | 1728.099944 | 1450.693237 |             |
| 1733.983837 |             |             |             |             |             |
| STIL        | STIL        | 6040.691816 | 6180.8404   | 3222.523794 |             |
| 3580.755084 |             |             |             |             |             |
| EPB42       | EPB42       | 4.166712755 | 0           | 4.460240545 | 0           |
| CFLAR       | CFLAR       | 12348.05325 | 12836.18201 | 11049.13089 |             |
| 13138.26215 |             |             |             |             |             |
| DHFRL1      | DHFRL1      | 1031.261407 | 1205.180246 | 714.7535473 |             |
| 932.7028443 |             |             |             |             |             |
| RAI2        | RAI2        | 40.62544936 | 5.282017149 | 207.4011853 |             |
| 144.171733  |             |             |             |             |             |
| CHD1        | CHD1        | 2934.407458 | 3893.726975 | 4080.005039 |             |
| 3596.447245 |             |             |             |             |             |
| PEX10       | PEX10       | 1117.720696 | 818.712658  | 1020.280025 |             |
| 1160.239185 |             |             |             |             |             |
| PDGFRB      | PDGFRB      | 46.87551849 | 70.42689532 | 0           | 12.74988115 |
| GRIA3       | GRIA3       | 5.208390943 | 0           | 0           | 0.980760089 |
| SRSF5       | SRSF5       | 8829.264327 | 10740.10154 | 11878.73563 |             |
| 13245.165   |             |             |             |             |             |
| TMEM115     | TMEM115     | 2170.857345 | 1638.305652 | 2181.057627 |             |
| 2044.884785 |             |             |             |             |             |
| TMEM99      | TMEM99      | 910.4267369 | 589.8252483 | 971.2173787 |             |
| 534.5142483 |             |             |             |             |             |
| KCNK4       | KCNK4       | 0           | 0.880336191 | 0           | 0           |
| EFCAB3      | EFCAB3      | 0           | 0           | 1.115060136 | 0           |
| FBX024      | FBX024      | 29.16698928 | 50.17916291 | 25.64638313 |             |
| 38.24964346 |             |             |             |             |             |
| MPHOSPH10   | MPHOSPH10   |             | 2714.61336  | 2075.832739 |             |
| 3176.806328 | 2791.243212 |             |             |             |             |
| PRDM4       | PRDM4       | 3516.705565 | 3339.99551  | 4163.634549 |             |
| 3520.928718 |             |             |             |             |             |
| PGF         | PGF         | 15.62517283 | 15.84605145 | 10.03554123 |             |
| 11.76912106 |             |             |             |             |             |
| YY2         | YY2         | 98.95942793 | 123.2470668 | 59.09818722 |             |
| 76.49928692 |             |             |             |             |             |
| CDH26       | CDH26       | 9.375103698 | 4.401680957 | 6.690360818 |             |
| 24.51900222 |             |             |             |             |             |
| SERP2       | SERP2       | 1.041678189 | 4.401680957 | 11.15060136 |             |
| 10.78836098 |             |             |             |             |             |
| EPS15L1     | EPS15L1     | 1093.762098 | 1644.468006 | 847.4457036 |             |
| 886.6071202 |             |             |             |             |             |
| RAB28       | RAB28       | 1302.097736 | 1057.283766 | 1378.214328 |             |
| 1133.758663 |             |             |             |             |             |
| NECAP2      | NECAP2      | 11078.24754 | 8056.836824 | 8018.39744  |             |
| 8251.134626 |             |             |             |             |             |

|             |          |               |               |             |
|-------------|----------|---------------|---------------|-------------|
| RAD54L      | RAD54L   | 3184.410223   | 4389.356251   | 2202.243769 |
| 3227.681452 |          |               |               |             |
| BOD1        | BOD1     | 226.0441669   | 416.3990186   | 476.1306782 |
| 321.6893091 |          |               |               |             |
| FAM217B     | FAM217B  | 1916.687867   | 2228.130901   | 2060.631132 |
| 1805.579323 |          |               |               |             |
| FAM177A1    | FAM177A1 |               | 2405.234938   | 1808.210537 |
| 1738.378752 |          | 1859.521128   |               |             |
| KIT         | KIT      | 346.8788368   | 14.08537906   | 292.1457557 |
| 153.9793339 |          |               |               |             |
| PRL         | PRL      | 3.125034566   | 11.44437049   | 0 0         |
| TRIQK       | TRIQK    | 16.66685102   | 87.15328295   | 44.60240545 |
| 93.17220842 |          |               |               |             |
| SGOL2       | SGOL2    | 2575.028482   | 2781.862365   | 1629.102859 |
| 1796.752482 |          |               |               |             |
| SCN1A       | SCN1A    | 0 7.923025723 | 1.115060136   | 10.78836098 |
| RAB43       | RAB43    | 645.840477    | 1431.426647   | 1041.466167 |
| 996.4522501 |          |               |               |             |
| PLSCR4      | PLSCR4   | 1.041678189   | 0 3.345180409 | 0.980760089 |
| SGCE        | SGCE     | 2.083356377   | 6.16235334    | 21.18614259 |
| 20.59596186 |          |               |               |             |
| TCEB1       | TCEB1    | 6063.608736   | 6104.251151   | 4493.692349 |
| 4444.804722 |          |               |               |             |
| GSTM5       | GSTM5    | 0 0           | 0 7.846080709 |             |
| CTSL        | CTSL     | 1351.056611   | 219.2037117   | 2465.397961 |
| 1307.353198 |          |               |               |             |
| PSMB4       | PSMB4    | 5300.058624   | 5195.744202   | 3311.728605 |
| 2973.664589 |          |               |               |             |
| STAG2       | STAG2    | 7413.623669   | 8566.551479   | 10212.83579 |
| 7890.214913 |          |               |               |             |
| RMDN1       | RMDN1    | 2956.2827     | 2697.350091   | 2331.590745 |
| 2604.898796 |          |               |               |             |
| SUSD1       | SUSD1    | 1454.182751   | 904.9856048   | 506.2373019 |
| 388.3809951 |          |               |               |             |
| C22orf39    | C22orf39 |               | 1823.978508   | 1894.483484 |
| 1787.441398 |          | 1723.195476   |               |             |
| CGREF1      | CGREF1   | 562.5062219   | 338.9294337   | 534.1138053 |
| 416.8230377 |          |               |               |             |
| HEATR5B     | HEATR5B  | 1477.099672   | 2059.106352   | 1916.788374 |
| 1801.656283 |          |               |               |             |
| TBC1D16     | TBC1D16  | 37.50041479   | 81.8712658    | 86.97469063 |
| 152.9985738 |          |               |               |             |
| FAM105A     | FAM105A  | 3391.704182   | 1699.929186   | 2562.408193 |
| 1590.792864 |          |               |               |             |
| C6orf62     | C6orf62  | 5481.310629   | 9692.501468   | 8166.700438 |
| 7056.568838 |          |               |               |             |
| POLR1B      | POLR1B   | 7443.832336   | 5532.032627   | 7240.085465 |
| 7910.810875 |          |               |               |             |
| PCDHGA10    | PCDHGA10 |               | 4.166712755   | 4.401680957 |
| 37.91204463 |          | 10.78836098   |               |             |

|              |              |             |             |                         |
|--------------|--------------|-------------|-------------|-------------------------|
| TOLLIP       | TOLLIP       | 2804.197684 | 2435.009906 | 3454.456302             |
| 2955.030147  |              |             |             |                         |
| LOC101928363 | LOC101928363 |             | 3.125034566 | 12.32470668             |
| 6.690360818  | 5.884560532  |             |             |                         |
| MPL          | MPL          | 2.083356377 | 2.641008574 | 0 2.942280266           |
| INPP1        | INPP1        | 1707.310551 | 993.0192239 | 1241.061932             |
| 967.0294474  |              |             |             |                         |
| DCST1        | DCST1        | 21.87524196 | 8.803361914 | 12.2656615              |
| 18.63444168  |              |             |             |                         |
| ARID3B       | ARID3B       | 4568.800536 | 5136.761677 | 2305.944362             |
| 2812.819934  |              |             |             |                         |
| TBL3         | TBL3         | 6313.611502 | 4847.13107  | 5652.239831             |
| 6245.480245  |              |             |             |                         |
| VM01         | VM01         | 0           | 1.760672383 | 2.230120273 6.865320621 |
| ARMC1        | ARMC1        | 5921.940503 | 4669.303159 | 5110.320605             |
| 4555.630612  |              |             |             |                         |
| CCDC186      | CCDC186      | 832.3008728 | 928.754682  | 1430.622155             |
| 911.1261224  |              |             |             |                         |
| THAP1        | THAP1        | 2511.486113 | 1691.125824 | 2303.714242             |
| 1805.579323  |              |             |             |                         |
| ANKRD45      | ANKRD45      | 0           | 0           | 1.115060136 0           |
| SETD3        | SETD3        | 4716.718838 | 4389.356251 | 3824.656267             |
| 4172.153417  |              |             |             |                         |
| RORA         | RORA         | 3303.161536 | 2766.89665  | 4269.565262             |
| 3826.925866  |              |             |             |                         |
| CYGB         | CYGB         | 5.208390943 | 0           | 12.2656615 3.923040355  |
| RAD17        | RAD17        | 4106.29542  | 3331.192148 | 4078.889978             |
| 3691.580974  |              |             |             |                         |
| POGZ         | POGZ         | 580.2147511 | 1260.641426 | 1065.99749              |
| 1028.817333  |              |             |             |                         |
| NADK2        | NADK2        | 1014.594556 | 979.8141811 | 1968.081141             |
| 1546.65866   |              |             |             |                         |
| CCDC77       | CCDC77       | 947.9271517 | 1000.061913 | 871.9770266             |
| 834.6268355  |              |             |             |                         |
| CHCHD4       | CHCHD4       | 2493.777584 | 1707.852211 | 1858.805247             |
| 2074.307588  |              |             |             |                         |
| SLC17A3      | SLC17A3      | 5.208390943 | 8.803361914 | 10.03554123             |
| 0.980760089  |              |             |             |                         |
| AP1B1        | AP1B1        | 5925.065537 | 10401.1721  | 4046.553235             |
| 5249.027995  |              |             |             |                         |
| ATP5L2       | ATP5L2       | 3.125034566 | 6.16235334  | 4.460240545             |
| 9.807600887  |              |             |             |                         |
| C10orf67     | C10orf67     |             | 38.54209298 | 57.22185244             |
| 11.15060136  | 23.53824213  |             |             |                         |
| SLC12A9      | SLC12A9      | 363.5456879 | 957.8057763 | 410.3421301             |
| 514.8990466  |              |             |             |                         |
| KCTD10       | KCTD10       | 5224.016116 | 5459.845059 | 4032.057453             |
| 5396.142008  |              |             |             |                         |
| MCF2L        | MCF2L        | 5.208390943 | 4.401680957 | 53.52288654             |
| 190.2674572  |              |             |             |                         |

|           |           |             |             |             |             |
|-----------|-----------|-------------|-------------|-------------|-------------|
| GJC3      | GJC3      | 6.250069132 | 0           | 30.10662368 | 8.826840798 |
| KRT27     | KRT27     | 1.041678189 | 0           | 0           | 0           |
| VPS13B    | VPS13B    | 2329.19243  | 2563.538989 | 2341.626286 |             |
|           |           | 2686.301883 |             |             |             |
| AQP11     | AQP11     | 140.6265555 | 114.4437049 | 59.09818722 |             |
|           |           | 79.44156718 |             |             |             |
| KCNH1     | KCNH1     | 0           | 0           | 6.865320621 |             |
| ELOVL2    | ELOVL2    | 0           | 0.880336191 | 0           | 0           |
| G2E3      | G2E3      | 2905.240468 | 2712.315806 | 2133.110041 |             |
|           |           | 2229.267682 |             |             |             |
| LRRC40    | LRRC40    | 2942.740883 | 2356.659984 | 1983.691982 |             |
|           |           | 2228.286921 |             |             |             |
| GSDMD     | GSDMD     | 6893.826253 | 8177.442882 | 4658.721249 |             |
|           |           | 7669.543893 |             |             |             |
| DI02      | DI02      | 0           | 0.880336191 | 0           | 4.903800443 |
| NUPL1     | NUPL1     | 8010.505271 | 8319.177009 | 6808.557192 |             |
|           |           | 7437.103752 |             |             |             |
| BRWD1     | BRWD1     | 3546.914233 | 3827.70176  | 4459.125485 |             |
|           |           | 3725.907577 |             |             |             |
| ZXDC      | ZXDC      | 1991.688697 | 1942.021638 | 2903.616595 |             |
|           |           | 2287.132527 |             |             |             |
| MT2A      | MT2A      | 9423.020895 | 17862.02132 | 11452.78266 |             |
|           |           | 12385.0384  |             |             |             |
| TPR       | TPR       | 9023.016471 | 10910.88676 | 9564.985849 |             |
|           |           | 9956.67642  |             |             |             |
| ARHGAP22  | ARHGAP22  |             | 2.083356377 | 1.760672383 |             |
|           |           | 21.18614259 | 2.942280266 |             |             |
| GABPA     | GABPA     | 3618.790028 | 3801.291675 | 3287.197282 |             |
|           |           | 3357.141784 |             |             |             |
| ADCY4     | ADCY4     | 12.50013826 | 34.33311147 | 44.60240545 |             |
|           |           | 31.38432284 |             |             |             |
| RIOK2     | RIOK2     | 3943.793622 | 2320.566201 | 3636.211104 |             |
|           |           | 2982.49143  |             |             |             |
| CKB       | CKB       | 135.4181645 | 241.2121165 | 175.0644414 |             |
|           |           | 176.536816  |             |             |             |
| CTGF      | CTGF      | 1.041678189 | 0           | 0           | 0           |
| CRYBA4    | CRYBA4    | 1.041678189 | 2.641008574 | 10.03554123 |             |
|           |           | 3.923040355 |             |             |             |
| CHGB      | CHGB      | 10.41678189 | 11.44437049 | 45.71746559 |             |
|           |           | 43.1534439  |             |             |             |
| RHOH      | RHOH      | 5617.770472 | 4358.544484 | 8797.824475 |             |
|           |           | 6589.727036 |             |             |             |
| SUPT7L    | SUPT7L    | 3968.793899 | 3325.910131 | 3084.256337 |             |
|           |           | 3404.218268 |             |             |             |
| LINC00589 | LINC00589 |             | 0           | 0.880336191 | 35.68192436 |
|           |           | 21.57672195 |             |             |             |
| LINC00593 | LINC00593 |             | 2.083356377 | 0           | 0           |
| BMS1P4    | BMS1P4    | 280.2114328 | 231.5284183 | 276.5349138 | 0           |
|           |           | 283.4396656 |             |             |             |
| GALNTL6   | GALNTL6   | 2.083356377 | 0           | 0           | 0           |

|             |            |             |             |             |
|-------------|------------|-------------|-------------|-------------|
| HAR1A       | HAR1A      | 10.41678189 | 29.05109432 | 26.76144327 |
| 115.7296905 |            |             |             |             |
| SNHG11      | SNHG11     | 389.5876426 | 350.3738042 | 312.2168382 |
| 372.6888337 |            |             |             |             |
| TROAP       | TROAP      | 3161.493303 | 3283.653994 | 1418.356493 |
| 2064.499987 |            |             |             |             |
| HSF4        | HSF4       | 126.0430608 | 168.1442126 | 70.24878858 |
| 162.8061747 |            |             |             |             |
| DFNB31      | DFNB31     | 219.7940978 | 213.9216945 | 238.6228692 |
| 183.4021366 |            |             |             |             |
| BEND4       | BEND4      | 36.4587366  | 29.93143051 | 6.690360818 |
| 6.865320621 |            |             |             |             |
| SLFN12L     | SLFN12L    | 294.7949274 | 468.3388538 | 352.3590031 |
| 413.8807574 |            |             |             |             |
| KCNAB1      | KCNAB1     | 6.250069132 | 28.17075813 | 45.71746559 |
| 36.28812328 |            |             |             |             |
| RPL38       | RPL38      | 11955.34057 | 11848.4448  | 12843.26265 |
| 11214.01085 |            |             |             |             |
| SLC9A7      | SLC9A7     | 1869.812349 | 1501.853543 | 1188.654105 |
| 953.2988062 |            |             |             |             |
| SPX         | SPX        | 65.62572589 | 36.97412004 | 11.15060136 |
| 35.30736319 |            |             |             |             |
| C1orf86     | C1orf86    | 1246.888792 | 1451.67438  | 1107.254715 |
| 1551.56246  |            |             |             |             |
| RASL11A     | RASL11A    | 31.25034566 | 15.84605145 | 63.55842777 |
| 21.57672195 |            |             |             |             |
| C14orf166   | C14orf166  |             | 9628.231498 | 8783.114182 |
| 8116.522732 | 7084.03012 |             |             |             |
| SBDS        | SBDS       | 4683.385136 | 2885.742036 | 6304.55001  |
| 4460.496883 |            |             |             |             |
| ZNF107      | ZNF107     | 2167.732311 | 2434.129569 | 3229.214155 |
| 2547.03395  |            |             |             |             |
| SLC26A7     | SLC26A7    | 6.250069132 | 10.5640343  | 10.03554123 |
| 5.884560532 |            |             |             |             |
| SLC13A4     | SLC13A4    | 9.375103698 | 15.84605145 | 43.48734531 |
| 22.55748204 |            |             |             |             |
| PPHLN1      | PPHLN1     | 5686.521232 | 6094.567453 | 5138.197108 |
| 5000.895692 |            |             |             |             |
| ACAP2       | ACAP2      | 2945.865918 | 3419.225768 | 3150.044885 |
| 2473.476944 |            |             |             |             |
| ATXN10      | ATXN10     | 6478.196656 | 6069.037704 | 5439.263345 |
| 6826.090217 |            |             |             |             |
| FAM65B      | FAM65B     | 8223.007622 | 8901.959568 | 9762.351493 |
| 5976.75198  |            |             |             |             |
| THSD4       | THSD4      | 0           | 0           | 0.980760089 |
| GLB1L       | GLB1L      | 246.8777307 | 247.3744698 | 199.5957644 |
| 247.1515423 |            |             |             |             |
| GUSBP9      | GUSBP9     | 63.54236951 | 92.4353001  | 81.39938995 |
| 63.74940576 |            |             |             |             |
| ATG5        | ATG5       | 4788.594633 | 3529.267791 | 4092.2707   |

|             |             |             |             |             |
|-------------|-------------|-------------|-------------|-------------|
| 3604.293326 |             |             |             |             |
| POLN        | POLN        | 90.62600242 | 117.9650497 | 93.66505145 |
| 88.26840798 |             |             |             |             |
| TMEM217     | TMEM217     | 370.8374352 | 399.6726309 | 206.2861252 |
| 343.266031  |             |             |             |             |
| GBGT1       | GBGT1       | 29.16698928 | 22.88874098 | 53.52288654 |
| 19.61520177 |             |             |             |             |
| C10orf128   | C10orf128   |             | 1613.559514 | 2552.974955 |
| 1214.300488 | 3056.048436 |             |             |             |
| DUSP22      | DUSP22      | 818.7590563 | 1160.2831   | 1464.073959 |
| 1428.967449 |             |             |             |             |
| USP49       | USP49       | 283.3364673 | 528.2017149 | 273.1897334 |
| 354.054392  |             |             |             |             |
| CAPS2       | CAPS2       | 10.41678189 | 23.76907717 | 54.63794668 |
| 39.23040355 |             |             |             |             |
| SAMSN1      | SAMSN1      | 13758.48552 | 7986.409929 | 10231.79181 |
| 7155.625607 |             |             |             |             |
| FUS         | FUS         | 6389.654009 | 14839.82718 | 9976.443039 |
| 11410.16287 |             |             |             |             |
| CHRM4       | CHRM4       | 5.208390943 | 0           | 8.92048109  |
| GBAS        | GBAS        | 5295.891911 | 4695.713245 | 3012.892488 |
| 4668.418022 |             |             |             | 1.961520177 |
| NPTN        | NPTN        | 2884.406905 | 2845.246571 | 2973.865383 |
| 2511.726587 |             |             |             |             |
| LARP6       | LARP6       | 0           | 0           | 11.15060136 |
| BCS1L       | BCS1L       | 2909.407181 | 1832.859951 | 4.903800443 |
| 2304.786208 |             |             |             | 1969.196201 |
| PROB1       | PROB1       | 885.4264604 | 902.3445962 | 366.8547848 |
| 373.6695938 |             |             |             |             |
| RPAIN       | RPAIN       | 10090.73661 | 7100.79172  | 9273.955153 |
| 9189.722031 |             |             |             |             |
| LILRA3      | LILRA3      | 0           | 0.880336191 | 0           |
| SCHIP1      | SCHIP1      | 6.250069132 | 14.96571525 | 0           |
| CANT1       | CANT1       | 488.5470705 | 2139.216945 | 13.73064124 |
| 740.4738669 |             |             |             | 621.0884959 |
| CHFR        | CHFR        | 4250.04701  | 3872.598906 | 2784.30516  |
| 2836.358176 |             |             |             |             |
| FMR1        | FMR1        | 1415.640658 | 1113.625282 | 1919.018495 |
| 975.8562882 |             |             |             |             |
| PACSIN2     | PACSIN2     | 2180.232449 | 2908.630777 | 2237.925693 |
| 2175.325877 |             |             |             |             |
| TRIM6       | TRIM6       | 12.50013826 | 36.09378385 | 1.115060136 |
| 28.44204257 |             |             |             |             |
| SMIM18      | SMIM18      | 9.375103698 | 10.5640343  | 25.64638313 |
| 8.826840798 |             |             |             |             |
| STUB1       | STUB1       | 8173.007069 | 5918.500215 | 7186.562578 |
| 7506.737719 |             |             |             |             |
| NFKBIZ      | NFKBIZ      | 3322.953422 | 2420.04419  | 4188.165872 |
| 4043.673846 |             |             |             |             |
| CPM         | CPM         | 800.0088489 | 706.0296255 | 519.6180235 |



|              |              |             |             |             |             |
|--------------|--------------|-------------|-------------|-------------|-------------|
| 1647.676949  |              |             |             |             |             |
| RBFOX3       | RBFOX3       | 0           | 6.16235334  | 5.575300681 | 2.942280266 |
| SYT3         | SYT3         | 0           | 2.641008574 | 6.690360818 | 0.980760089 |
| YARS2        | YARS2        | 2157.315529 | 1853.107683 | 1626.872739 |             |
| 1910.520653  |              |             |             |             |             |
| ANAPC15      | ANAPC15      | 3323.9951   | 2931.519517 | 1690.431167 |             |
| 2039.000224  |              |             |             |             |             |
| SPIDR        | SPIDR        | 1915.646189 | 2244.857288 | 1418.356493 |             |
| 2497.995946  |              |             |             |             |             |
| RALGAPB      | RALGAPB      | 3469.830047 | 3981.760594 | 4433.479102 |             |
| 3777.887862  |              |             |             |             |             |
| UBE3C        | UBE3C        | 6100.067473 | 7198.509037 | 5636.628989 |             |
| 5735.484999  |              |             |             |             |             |
| LOC102659288 | LOC102659288 |             | 5.208390943 | 0           | 7.805420954 |
| 0            |              |             |             |             |             |
| CD14         | CD14         | 13.54181645 | 1.760672383 | 72.47890886 |             |
| 11.76912106  |              |             |             |             |             |
| CXorf36      | CXorf36      | 0           | 0           | 0.980760089 |             |
| BCL2L14      | BCL2L14      | 369.795757  | 142.614463  | 1107.254715 |             |
| 511.9567663  |              |             |             |             |             |
| HMGNS        | HMGNS        | 131.2514518 | 294.9126241 | 165.0289002 |             |
| 159.8638945  |              |             |             |             |             |
| TANC2        | TANC2        | 53.12558762 | 299.3143051 | 282.1102145 |             |
| 152.0178137  |              |             |             |             |             |
| WNT4         | WNT4         | 1.041678189 | 5.282017149 | 20.07108245 |             |
| 0.980760089  |              |             |             |             |             |
| NRBF2        | NRBF2        | 2859.406628 | 2319.685864 | 2729.667214 |             |
| 2166.499036  |              |             |             |             |             |
| DISP1        | DISP1        | 133.3348082 | 103.8796706 | 338.9782814 |             |
| 240.2862217  |              |             |             |             |             |
| KPNA7        | KPNA7        | 0           | 0           | 2.942280266 |             |
| SRP9         | SRP9         | 23126.29747 | 23267.28554 | 20245.03183 |             |
| 20949.03549  |              |             |             |             |             |
| STYX         | STYX         | 3769.833365 | 3564.481239 | 3621.715323 |             |
| 2955.030147  |              |             |             |             |             |
| CHST8        | CHST8        | 1.041678189 | 0           | 0           | 0           |
| CEACAM19     | CEACAM19     |             | 1.041678189 | 0           | 5.575300681 |
| 0.980760089  |              |             |             |             |             |
| PDZK1        | PDZK1        | 7.291747321 | 14.08537906 | 31.22168382 |             |
| 3.923040355  |              |             |             |             |             |
| PRKAA1       | PRKAA1       | 3557.331014 | 4211.52834  | 4465.815846 |             |
| 3932.847956  |              |             |             |             |             |
| SLC12A4      | SLC12A4      | 1604.184411 | 1928.816595 | 1276.743856 |             |
| 1251.449873  |              |             |             |             |             |
| PRKCB        | PRKCB        | 12620.97293 | 11460.21654 | 11613.35132 |             |
| 13454.0669   |              |             |             |             |             |
| LINC01091    | LINC01091    |             | 0           | 0           | 1.961520177 |
| MIR3157      | MIR3157      | 0           | 0           | 2.942280266 |             |
| MIR3153      | MIR3153      | 11.45846008 | 18.48706002 | 3.345180409 |             |
| 0.980760089  |              |             |             |             |             |

|              |              |             |             |             |             |
|--------------|--------------|-------------|-------------|-------------|-------------|
| MIR3143      | MIR3143      | 3.125034566 | 3.521344766 | 0           | 4.903800443 |
| SPATA33      | SPATA33      | 255.2111562 | 261.4598489 | 218.5517867 |             |
| 199.094298   |              |             |             |             |             |
| MIR3200      | MIR3200      | 0           | 0           | 1.115060136 | 0           |
| PRDM11       | PRDM11       | 48.95887487 | 19.36739621 | 101.4704724 |             |
| 26.48052239  |              |             |             |             |             |
| MELK         | MELK         | 7673.001538 | 6721.366822 | 4430.133921 |             |
| 5054.837497  |              |             |             |             |             |
| FAM193A      | FAM193A      | 488.5470705 | 744.764418  | 679.071623  |             |
| 626.7056967  |              |             |             |             |             |
| MIR4315-2    | MIR4315-2    |             | 214.5857069 | 189.2722812 |             |
| 276.5349138  | 190.2674572  |             |             |             |             |
| BRSK2        | BRSK2        | 0           | 6.16235334  | 6.690360818 | 3.923040355 |
| TUBGCP2      | TUBGCP2      | 5712.563187 | 4382.313561 | 4598.508002 |             |
| 4836.127997  |              |             |             |             |             |
| MIR941-4     | MIR941-4     |             | 0           | 2.641008574 | 0           |
| 0.980760089  |              |             |             |             |             |
| CHRNA7       | CHRNA7       | 3.125034566 | 0           | 0           | 0           |
| HCP5         | HCP5         | 1.041678189 | 7.923025723 | 8.92048109  |             |
| 23.53824213  |              |             |             |             |             |
| ZNF74        | ZNF74        | 497.9221742 | 398.7922947 | 926.6149732 |             |
| 777.7427503  |              |             |             |             |             |
| SSBP1        | SSBP1        | 12014.71623 | 9416.95624  | 10356.67855 |             |
| 9592.814427  |              |             |             |             |             |
| TBC1D10C     | TBC1D10C     |             | 12067.84182 | 9666.971718 |             |
| 5467.139848  | 7741.13938   |             |             |             |             |
| TSP0         | TSP0         | 6837.575631 | 7085.826005 | 4996.584471 |             |
| 6027.751505  |              |             |             |             |             |
| BLOC1S1      | BLOC1S1      | 2185.44084  | 2701.751772 | 1736.148632 |             |
| 1985.058419  |              |             |             |             |             |
| CYP21A1P     | CYP21A1P     |             | 0           | 0.880336191 | 0           |
| LOC100130476 | LOC100130476 |             | 181.2520048 | 135.5717735 | 0           |
| 267.6144327  | 161.8254146  |             |             |             |             |
| ZNF663P      | ZNF663P      | 3.125034566 | 1.760672383 | 0           | 1.961520177 |
| LOC283693    | LOC283693    |             | 9.375103698 | 34.33311147 |             |
| 27.87650341  | 15.69216142  |             |             |             |             |
| LINC00607    | LINC00607    |             | 0           | 2.641008574 | 0           |
| 0.980760089  |              |             |             |             |             |
| HERC2P9      | HERC2P9      | 93.75103698 | 132.0504287 | 112.6210738 |             |
| 154.960094   |              |             |             |             |             |
| ZSCAN18      | ZSCAN18      | 125.0013826 | 146.1358078 | 917.6944921 |             |
| 775.7812301  |              |             |             |             |             |
| C3           | C3           | 2.083356377 | 2.641008574 | 146.0728779 |             |
| 31.38432284  |              |             |             |             |             |
| SLC26A1      | SLC26A1      | 53.12558762 | 116.2043773 | 112.6210738 |             |
| 152.9985738  |              |             |             |             |             |
| OLAH         | OLAH         | 87.50096785 | 18.48706002 | 121.5415549 |             |
| 14.71140133  |              |             |             |             |             |
| DOHH         | DOHH         | 2859.406628 | 2132.174256 | 1862.150428 |             |
| 1908.559133  |              |             |             |             |             |

|                |                |             |             |             |
|----------------|----------------|-------------|-------------|-------------|
| KATNAL2        | KATNAL2        | 21.87524196 | 54.58084387 | 13.38072164 |
| 29.42280266    |                |             |             |             |
| TIGD4          | TIGD4          | 5.208390943 | 14.96571525 | 17.84096218 |
| 18.63444168    |                |             |             |             |
| GLT8D2         | GLT8D2         | 20.83356377 | 7.042689532 | 18.95602232 |
| 13.73064124    |                |             |             |             |
| FGGY           | FGGY           | 492.7137833 | 387.3479242 | 231.9325083 |
| 398.188596     |                |             |             |             |
| TMEM209        | TMEM209        | 6874.034367 | 5668.484737 | 5481.63563  |
| 5838.464808    |                |             |             |             |
| ARSG           | ARSG           | 138.5431991 | 565.1758349 | 477.2457383 |
| 376.611874     |                |             |             |             |
| RASSF4         | RASSF4         | 106.2511752 | 114.4437049 | 99.24035213 |
| 152.0178137    |                |             |             |             |
| IP6K3          | IP6K3          | 0           | 3.345180409 | 0           |
| UNC119         | UNC119         | 2564.611701 | 2064.388369 | 1806.397421 |
| 2114.518751    |                |             |             |             |
| BACE1          | BACE1          | 27.08363291 | 58.98252483 | 55.75300681 |
| 51.9802847     |                |             |             |             |
| FAM120A        | FAM120A        | 2651.07099  | 3556.558213 | 2138.685341 |
| 2247.902123    |                |             |             |             |
| C20orf203      | C20orf203      | 0           | 0           | 8.92048109  |
| 0.980760089    |                |             |             |             |
| IL12RB2        | IL12RB2        | 8331.342153 | 10628.29884 | 5389.085639 |
| 9815.446967    |                |             |             |             |
| RTN4           | RTN4           | 2717.738394 | 4597.115592 | 3564.847256 |
| 2773.589531    |                |             |             |             |
| RCAN2          | RCAN2          | 1128.137478 | 1390.050846 | 212.976486  |
| 1682.984312    |                |             |             |             |
| DUSP28         | DUSP28         | 363.5456879 | 441.9287681 | 292.1457557 |
| 330.5161499    |                |             |             |             |
| RGPD1          | RGPD1          | 46.87551849 | 34.33311147 | 72.47890886 |
| 110.82589      |                |             |             |             |
| DNMBP          | DNMBP          | 102.0844625 | 224.4857288 | 254.2337111 |
| 213.8056993    |                |             |             |             |
| SLC39A10       | SLC39A10       | 1546.65866  | 1589.600916 | 1869.834071 |
| 1237.716751    |                |             |             |             |
| C12orf65       | C12orf65       | 1707.503314 | 1383.348635 | 1398.854208 |
| 2404.069654    |                |             |             |             |
| FAM178B        | FAM178B        | 6.250069132 | 2.641008574 | 0           |
| ACAP1          | ACAP1          | 11776.17192 | 12094.93893 | 5.884560532 |
| 10410.76834    |                |             |             | 6051.43136  |
| MCUR1          | MCUR1          | 3263.577765 | 3174.492306 | 2512.230487 |
| 2525.457228    |                |             |             |             |
| DROSHA         | DROSHA         | 2860.448306 | 3543.353171 | 2213.39437  |
| 2575.475993    |                |             |             |             |
| SYCE1L         | SYCE1L         | 431.2547701 | 396.1512861 | 352.3590031 |
| 393.2847956    |                |             |             |             |
| RPL17-C18orf32 | RPL17-C18orf32 | 14523.09539 | 16175.17891 | 15898.87162 |
| 17299.04295    |                |             |             |             |

|             |           |             |             |             |   |
|-------------|-----------|-------------|-------------|-------------|---|
| CSTF3       | CSTF3     | 4371.923358 | 3053.005912 | 3317.303905 |   |
| 3199.239409 |           |             |             |             |   |
| DPCD        | DPCD      | 434.3798047 | 301.9553137 | 379.1204463 |   |
| 402.1116364 |           |             |             |             |   |
| CCDC178     | CCDC178   | 0           | 1.115060136 | 0           |   |
| PHACTR3     | PHACTR3   | 0           | 0           | 0.980760089 |   |
| OCLN        | OCLN      | 5.208390943 | 10.5640343  | 35.68192436 |   |
| 7.846080709 |           |             |             |             |   |
| ATP6AP1     | ATP6AP1   | 6138.609566 | 5026.719653 | 5817.268731 |   |
| 5117.606143 |           |             |             |             |   |
| SUPT6H      | SUPT6H    | 3755.24987  | 5560.203385 | 4357.655013 |   |
| 4676.264103 |           |             |             |             |   |
| KRTAP7-1    | KRTAP7-1  |             | 1.041678189 | 0           | 0 |
| ZC2HC1C     | ZC2HC1C   | 127.084739  | 97.71731725 | 104.8156528 | 0 |
| 95.1337286  |           |             |             |             |   |
| GALNT12     | GALNT12   | 65.62572589 | 170.7852211 | 374.6602058 |   |
| 606.1097348 |           |             |             |             |   |
| GNB1L       | GNB1L     | 1164.596215 | 711.3116427 | 1064.88243  |   |
| 837.5691157 |           |             |             |             |   |
| LEPRE1      | LEPRE1    | 2741.696993 | 1699.048849 | 1953.585359 |   |
| 1776.156521 |           |             |             |             |   |
| CMTR2       | CMTR2     | 2909.407181 | 2800.349425 | 2426.370857 |   |
| 2445.034901 |           |             |             |             |   |
| SLC29A3     | SLC29A3   | 568.756291  | 317.8013651 | 502.8921215 |   |
| 484.4954838 |           |             |             |             |   |
| ERMARD      | ERMARD    | 1396.890451 | 1059.044438 | 1173.043263 |   |
| 1418.179088 |           |             |             |             |   |
| UBFD1       | UBFD1     | 4165.671077 | 3641.070488 | 3492.368347 |   |
| 3584.678124 |           |             |             |             |   |
| ZFHX4       | ZFHX4     | 0           | 0           | 5.884560532 |   |
| PCBP2-OT1   | PCBP2-OT1 |             | 445.8382648 | 419.0400271 |   |
| 506.2373019 |           | 410.9384772 |             |             |   |
| GPR125      | GPR125    | 881.2597476 | 875.9345105 | 419.2626112 |   |
| 874.8379991 |           |             |             |             |   |
| CERS3       | CERS3     | 0           | 1.115060136 | 0           |   |
| SLC45A1     | SLC45A1   | 1.041678189 | 4.401680957 | 33.45180409 |   |
| 15.69216142 |           |             |             |             |   |
| CLN3        | CLN3      | 2770.863982 | 1817.013899 | 2086.277515 |   |
| 2128.249392 |           |             |             |             |   |
| VAMP5       | VAMP5     | 2517.736182 | 1886.560458 | 1794.131759 |   |
| 1268.122795 |           |             |             |             |   |
| PTX3        | PTX3      | 1.041678189 | 2.641008574 | 7.805420954 |   |
| 0.980760089 |           |             |             |             |   |
| CDK2        | CDK2      | 6165.693199 | 6434.377223 | 3678.58339  |   |
| 5443.218492 |           |             |             |             |   |
| CPT1B       | CPT1B     | 343.7538023 | 1020.309646 | 427.0680322 |   |
| 800.3002324 |           |             |             |             |   |
| BRD9        | BRD9      | 2204.191047 | 1736.903306 | 1786.326338 |   |
| 1804.598563 |           |             |             |             |   |
| AG03        | AG03      | 1400.015486 | 1250.077392 | 1461.843839 |   |

|             |          |             |             |             |            |
|-------------|----------|-------------|-------------|-------------|------------|
| 1225.950111 |          |             |             |             |            |
| ZNF485      | ZNF485   | 45.8338403  | 82.751602   | 367.969845  |            |
| 423.6883583 |          |             |             |             |            |
| PACS2       | PACS2    | 438.5465174 | 595.9876016 | 981.2529199 |            |
| 1015.086692 |          |             |             |             |            |
| APOL3       | APOL3    | 7246.955159 | 5663.20272  | 8496.758238 |            |
| 5897.310413 |          |             |             |             |            |
| MRPL33      | MRPL33   | 3970.877255 | 4071.554885 | 3658.512307 |            |
| 3378.718505 |          |             |             |             |            |
| IRAK3       | IRAK3    | 97.91774974 | 146.1358078 | 5.575300681 |            |
| 57.86484523 |          |             |             |             |            |
| UTP18       | UTP18    | 7378.206611 | 5632.390953 | 6802.981891 |            |
| 6652.495681 |          |             |             |             |            |
| GEMIN5      | GEMIN5   | 4383.381818 | 3396.337027 | 4888.423637 |            |
| 4710.590706 |          |             |             |             |            |
| FANCF       | FANCF    | 1357.30668  | 1412.059251 | 1431.737215 |            |
| 1558.427781 |          |             |             |             |            |
| CLEC7A      | CLEC7A   | 6.250069132 | 6.16235334  | 7.805420954 |            |
| 13.73064124 |          |             |             |             |            |
| DIRC2       | DIRC2    | 318.7535257 | 156.6998421 | 316.6770787 |            |
| 228.5171007 |          |             |             |             |            |
| PSMB8       | PSMB8    | 441.671552  | 91.55496391 | 382.4656267 |            |
| 65.71092594 |          |             |             |             |            |
| MARK1       | MARK1    | 0           | 1.115060136 | 0           |            |
| 0           |          |             |             |             |            |
| PECR        | PECR     | 1239.597045 | 1141.79604  | 560.8752485 |            |
| 798.3387122 |          |             |             |             |            |
| NPPA        | NPPA     | 5.208390943 | 16.72638764 | 14.49578177 |            |
| 9.807600887 |          |             |             |             |            |
| DENND4C     | DENND4C  | 2594.820368 | 2980.818344 | 3706.459893 |            |
| 2886.376941 |          |             |             |             |            |
| SLC25A27    | SLC25A27 | 0           | 1.760672383 | 0           |            |
| 6.865320621 |          |             |             |             |            |
| CXCL11      | CXCL11   | 26.04195472 | 8.803361914 | 112.6210738 |            |
| 16.67292151 |          |             |             |             |            |
| CCL13       | CCL13    | 0           | 9.683698106 | 22.30120273 | 17.6536816 |
| GPRC5A      | GPRC5A   | 14.58349464 | 8.803361914 | 10.03554123 |            |
| 10.78836098 |          |             |             |             |            |
| CALCB       | CALCB    | 4.166712755 | 2.641008574 | 21.18614259 |            |
| 9.807600887 |          |             |             |             |            |
| TMC7        | TMC7     | 4.166712755 | 8.803361914 | 12.2656615  |            |
| 2.942280266 |          |             |             |             |            |
| GRIK2       | GRIK2    | 0           | 5.575300681 | 0           |            |
| 0           |          |             |             |             |            |
| DEFB4A      | DEFB4A   | 0           | 0           | 1.961520177 |            |
| 0           |          |             |             |             |            |
| PRF1        | PRF1     | 9185.518268 | 10314.01882 | 4034.287573 |            |
| 7230.163374 |          |             |             |             |            |
| DHX8        | DHX8     | 4268.797217 | 4304.843976 | 3906.055657 |            |
| 3252.200454 |          |             |             |             |            |
| CHP1        | CHP1     | 1413.557302 | 3324.149459 | 1033.660746 |            |
| 1237.719232 |          |             |             |             |            |
| SLC6A14     | SLC6A14  | 0           | 0           | 1.961520177 |            |
| 0           |          |             |             |             |            |

|             |         |             |             |             |
|-------------|---------|-------------|-------------|-------------|
| UTP11L      | UTP11L  | 5622.978863 | 3997.606645 | 4201.546593 |
| 4431.074081 |         |             |             |             |
| SLC6A8      | SLC6A8  | 3.125034566 | 14.08537906 | 10.03554123 |
| 4.903800443 |         |             |             |             |
| H6PD        | H6PD    | 552.08944   | 1535.306318 | 1144.0517   |
| 1070.990017 |         |             |             |             |
| PRRX2       | PRRX2   | 19.79188559 | 35.21344766 | 16.72590204 |
| 46.09572417 |         |             |             |             |
| TCF19       | TCF19   | 21.87524196 | 19.36739621 | 32.33674395 |
| 19.61520177 |         |             |             |             |
| U2AF1L4     | U2AF1L4 | 1329.181369 | 1140.035368 | 1431.737215 |
| 1345.602842 |         |             |             |             |
| AP1S1       | AP1S1   | 184.3770394 | 671.6965141 | 152.7632387 |
| 196.1520177 |         |             |             |             |
| CTSD        | CTSD    | 9216.768614 | 8501.406601 | 6155.131952 |
| 6553.438912 |         |             |             |             |
| POU3F1      | POU3F1  | 10.41678189 | 65.14487817 | 4.460240545 |
| 7.846080709 |         |             |             |             |
| PC          | PC      | 748.9666177 | 507.9539825 | 675.7264426 |
| 685.551302  |         |             |             |             |
| IMPAD1      | IMPAD1  | 4305.255954 | 4317.168683 | 4173.67009  |
| 3771.022541 |         |             |             |             |
| OSGEP       | OSGEP   | 3868.792793 | 2965.852629 | 3040.768992 |
| 3682.754133 |         |             |             |             |
| LIME1       | LIME1   | 4270.880574 | 5163.171763 | 948.916176  |
| 1545.6779   |         |             |             |             |
| PRRX1       | PRRX1   | 3.125034566 | 0           | 0           |
| HEATR2      | HEATR2  | 1165.637893 | 1196.376884 | 846.3306434 |
| 1086.682178 |         |             |             |             |
| FLVCR2      | FLVCR2  | 845.8426892 | 530.8427234 | 633.3541574 |
| 970.9524878 |         |             |             |             |
| RGS3        | RGS3    | 1059.386718 | 1888.321131 | 1115.060136 |
| 1551.56246  |         |             |             |             |
| 00EP        | 00EP    | 1.041678189 | 3.521344766 | 0           |
| RELN        | RELN    | 0           | 0           | 5.884560532 |
| GAS1        | GAS1    | 10.41678189 | 23.76907717 | 30.10662368 |
| 10.78836098 |         |             |             |             |
| TRIM23      | TRIM23  | 725.0080193 | 765.0121504 | 1074.917971 |
| 885.6263601 |         |             |             |             |
| LRRC43      | LRRC43  | 0           | 0.880336191 | 0           |
| MICAL3      | MICAL3  | 311.4617784 | 302.8356499 | 273.1897334 |
| 307.9586678 |         |             |             |             |
| JPH4        | JPH4    | 8.33342551  | 11.44437049 | 3.345180409 |
| 7.846080709 |         |             |             |             |
| KLHDC3      | KLHDC3  | 6044.858529 | 6281.198726 | 4682.137512 |
| 5643.29355  |         |             |             |             |
| APOBR       | APOBR   | 113.5429226 | 141.7341268 | 43.48734531 |
| 46.09572417 |         |             |             |             |
| TAF9B       | TAF9B   | 5985.482872 | 4792.550226 | 4805.909187 |
| 4291.806148 |         |             |             |             |

|              |              |             |             |             |
|--------------|--------------|-------------|-------------|-------------|
| POLR1D       | POLR1D       | 3311.494962 | 3147.201884 | 3108.78766  |
| 2731.416847  |              |             |             |             |
| PAM16        | PAM16        | 939.5937262 | 839.8407266 | 718.0987278 |
| 849.3382368  |              |             |             |             |
| MRPS23       | MRPS23       | 4426.090624 | 3325.910131 | 4038.747814 |
| 3622.927768  |              |             |             |             |
| LIG1         | LIG1         | 9667.815269 | 8477.637524 | 5146.002529 |
| 7734.274059  |              |             |             |             |
| LOC101928378 | LOC101928378 |             | 1330.223047 | 1412.939587 |
| 1421.701674  | 1868.347969  |             |             |             |
| DDX59        | DDX59        | 1868.770671 | 1589.887162 | 1524.287206 |
| 1577.062223  |              |             |             |             |
| FAM63B       | FAM63B       | 1386.473669 | 871.5328295 | 1256.672774 |
| 1003.317571  |              |             |             |             |
| NDUFA2       | NDUFA2       | 3801.083711 | 5201.026219 | 3181.266569 |
| 3685.696413  |              |             |             |             |
| PDZD9        | PDZD9        | 1.041678189 | 7.923025723 | 7.805420954 |
| 3.923040355  |              |             |             |             |
| CEACAM4      | CEACAM4      | 0           | 0.880336191 | 0           |
| CD4          | CD4          | 20574.18591 | 24275.27048 | 11334.58629 |
| 17647.79704  |              |             |             |             |
| DGKH         | DGKH         | 991.6776356 | 935.7973715 | 509.5824823 |
| 624.7441765  |              |             |             |             |
| OLFM4        | OLFM4        | 0           | 0           | 1.961520177 |
| SLC35A1      | SLC35A1      | 1871.895705 | 1017.668637 | 2111.923898 |
| 1423.082889  |              |             |             |             |
| ERICH2       | ERICH2       | 1.041678189 | 10.5640343  | 5.575300681 |
| 9.807600887  |              |             |             |             |
| TMPRSS3      | TMPRSS3      | 954.1772208 | 984.215862  | 787.2324562 |
| 925.8375237  |              |             |             |             |
| ANKRD28      | ANKRD28      | 2686.488049 | 4434.253396 | 1936.859457 |
| 2740.243688  |              |             |             |             |
| SIRT6        | SIRT6        | 88.54264604 | 183.990264  | 55.75300681 |
| 63.74940576  |              |             |             |             |
| DOC2A        | DOC2A        | 79.16754234 | 180.4689192 | 46.83252572 |
| 67.67244612  |              |             |             |             |
| ACTN4        | ACTN4        | 1839.603681 | 3768.719236 | 983.4830402 |
| 1030.778853  |              |             |             |             |
| PDCD1        | PDCD1        | 2167.732311 | 2753.691607 | 1400.515531 |
| 3290.450097  |              |             |             |             |
| CCT6A        | CCT6A        | 31145.13616 | 20423.79964 | 26068.99093 |
| 25261.4376   |              |             |             |             |
| EDN2         | EDN2         | 1.041678189 | 0           | 1.115060136 |
| NDUFA4       | NDUFA4       | 17640.82013 | 19096.25266 | 14800.19319 |
| 15025.24456  |              |             |             |             |
| RPL31        | RPL31        | 9929.276495 | 12860.83142 | 18824.44522 |
| 14385.78898  |              |             |             |             |
| ACTN1        | ACTN1        | 8657.387426 | 4112.05035  | 10765.90562 |
| 8512.01681   |              |             |             |             |
| PRPF4        | PRPF4        | 6179.235015 | 4630.568367 | 5586.451283 |

|             |            |             |             |             |
|-------------|------------|-------------|-------------|-------------|
| 5583.467185 |            |             |             |             |
| NDUFA8      | NDUFA8     | 3713.582743 | 3028.356499 | 2346.086527 |
| 2594.110435 |            |             |             |             |
| ITPK1       | ITPK1      | 2768.780626 | 3057.407593 | 1931.284156 |
| 1940.924215 |            |             |             |             |
| FZD3        | FZD3       | 951.0521863 | 1146.197721 | 759.3559528 |
| 1045.490255 |            |             |             |             |
| RCBTB1      | RCBTB1     | 2523.986251 | 2573.222688 | 1898.947412 |
| 2286.151767 |            |             |             |             |
| DDX31       | DDX31      | 1487.516453 | 925.2333372 | 1390.47999  |
| 1355.410443 |            |             |             |             |
| PMFBP1      | PMFBP1     | 6.250069132 | 4.401680957 | 12.2656615  |
| 11.76912106 |            |             |             |             |
| NLRP8       | NLRP8      | 1.041678189 | 0           | 0           |
| CALCOC02    | CALCOC02   |             | 7891.753958 | 5627.989272 |
| 10057.84243 | 5528.54462 |             |             |             |
| C5orf45     | C5orf45    | 847.9260456 | 826.6356838 | 1452.923358 |
| 1286.757236 |            |             |             |             |
| GOLGA8B     | GOLGA8B    | 540.6309799 | 841.601399  | 409.22707   |
| 645.3401383 |            |             |             |             |
| KRT39       | KRT39      | 0           | 0           | 0.980760089 |
| EIF2AK1     | EIF2AK1    | 17557.48587 | 14427.82984 | 11626.73204 |
| 14009.17711 |            |             |             |             |
| ATF7        | ATF7       | 1181.263066 | 1600.451196 | 1508.676364 |
| 1363.256523 |            |             |             |             |
| PABPC1L     | PABPC1L    | 196.8771777 | 343.3311147 | 146.0728779 |
| 303.0548674 |            |             |             |             |
| HM13        | HM13       | 12848.05878 | 8004.016653 | 10840.61464 |
| 8900.397805 |            |             |             |             |
| MKRN3       | MKRN3      | 60.41733494 | 91.55496391 | 26.76144327 |
| 99.05676896 |            |             |             |             |
| NELFA       | NELFA      | 1991.688697 | 1671.758428 | 1873.301029 |
| 1970.347018 |            |             |             |             |
| UPF1        | UPF1       | 6474.029943 | 6672.948331 | 8163.355258 |
| 6788.821334 |            |             |             |             |
| CARD9       | CARD9      | 67.70908227 | 70.42689532 | 91.43493117 |
| 74.53776674 |            |             |             |             |
| CEP164      | CEP164     | 512.5056688 | 564.2954987 | 499.546941  |
| 482.5339636 |            |             |             |             |
| KIF3C       | KIF3C      | 88.54264604 | 257.0581679 | 157.2234792 |
| 150.0562936 |            |             |             |             |
| CIB1        | CIB1       | 8004.255202 | 7011.877765 | 7895.740825 |
| 8301.15339  |            |             |             |             |
| COX10       | COX10      | 5016.722157 | 4614.722316 | 2680.604568 |
| 3053.106156 |            |             |             |             |
| CLIC2       | CLIC2      | 53.12558762 | 9.683698106 | 129.3469758 |
| 33.34584301 |            |             |             |             |
| CLIC1       | CLIC1      | 1.041678189 | 0           | 0           |
| PSMB9       | PSMB9      | 25.00027653 | 120.6060582 | 33.45180409 |
| 187.3251769 |            |             |             |             |



|             |             |             |             |             |             |
|-------------|-------------|-------------|-------------|-------------|-------------|
| PMCH        | PMCH        | 1062.511752 | 621.5173512 | 370.1999652 |             |
| 439.3805197 |             |             |             |             |             |
| GMFB        | GMFB        | 5870.898272 | 4295.160278 | 4873.927856 |             |
| 4312.40211  |             |             |             |             |             |
| TJP2        | TJP2        | 3663.58219  | 5156.129073 | 1334.726983 |             |
| 2175.325877 |             |             |             |             |             |
| TMEM136     | TMEM136     | 28.12531109 | 29.05109432 | 23.41626286 |             |
| 44.13420399 |             |             |             |             |             |
| PPAN-P2RY11 | PPAN-P2RY11 |             | 5754.230314 | 4337.416415 |             |
| 5282.039865 | 5939.483097 |             |             |             |             |
| FCRLA       | FCRLA       | 0           | 1.760672383 | 0           |             |
| LOH12CR2    | LOH12CR2    |             | 42.70880574 | 50.17916291 |             |
| 13.38072164 | 19.61520177 |             |             |             |             |
| LTB4R       | LTB4R       | 194.7938213 | 471.8601986 | 128.2319157 |             |
| 347.1890714 |             |             |             |             |             |
| SEC24A      | SEC24A      | 4230.255124 | 4947.489396 | 3586.033398 |             |
| 3476.794514 |             |             |             |             |             |
| NR4A1       | NR4A1       | 2920.865641 | 2052.943998 | 4783.607985 |             |
| 8580.670016 |             |             |             |             |             |
| IMPA1       | IMPA1       | 4241.713584 | 3678.044608 | 3299.462943 |             |
| 3288.488577 |             |             |             |             |             |
| NCKAP1      | NCKAP1      | 107.2928534 | 211.2806859 | 322.2523794 |             |
| 550.2064097 |             |             |             |             |             |
| CCDC113     | CCDC113     | 34.37538023 | 31.69210289 | 78.05420954 |             |
| 95.1337286  |             |             |             |             |             |
| TNP02       | TNP02       | 622.9235568 | 1409.418242 | 753.7806521 |             |
| 661.0322998 |             |             |             |             |             |
| KLRC4       | KLRC4       | 8.33342551  | 0           | 63.55842777 | 4.903800443 |
| EFHD2       | EFHD2       | 8300.091808 | 10571.95732 | 4915.185081 |             |
| 6754.494731 |             |             |             |             |             |
| EMC3        | EMC3        | 5278.183382 | 3843.547812 | 3652.937006 |             |
| 3154.124445 |             |             |             |             |             |
| ZNF239      | ZNF239      | 8.33342551  | 20.2477324  | 168.3740806 |             |
| 243.228502  |             |             |             |             |             |
| MAPK6       | MAPK6       | 5787.564016 | 4982.702844 | 3310.613545 |             |
| 3013.875752 |             |             |             |             |             |
| C19orf80    | C19orf80    |             | 0           | 0.880336191 | 0           |
| ZNHIT3      | ZNHIT3      | 3760.458261 | 3192.979366 | 3710.920133 | 0           |
| 2744.166728 |             |             |             |             |             |
| NR0B2       | NR0B2       | 7.291747321 | 1.760672383 | 11.15060136 |             |
| 1.961520177 |             |             |             |             |             |
| SNORD51     | SNORD51     | 4.166712755 | 3.521344766 | 4.460240545 |             |
| 9.807600887 |             |             |             |             |             |
| MIR6764     | MIR6764     | 10.41678189 | 14.08537906 | 11.15060136 |             |
| 10.78836098 |             |             |             |             |             |
| MIR6763     | MIR6763     | 0           | 0           | 0.980760089 |             |
| MIR6762     | MIR6762     | 1.041678189 | 4.401680957 | 4.460240545 |             |
| 0.980760089 |             |             |             |             |             |
| EHF         | EHF         | 0           | 0.880336191 | 0           | 3.923040355 |
| MGST2       | MGST2       | 1009.386165 | 1441.990682 | 405.8818896 |             |

|             |           |             |             |             |   |
|-------------|-----------|-------------|-------------|-------------|---|
| 747.3391876 |           |             |             |             |   |
| ADAT1       | ADAT1     | 1809.395014 | 1422.623285 | 1916.788374 |   |
| 1464.274812 |           |             |             |             |   |
| DNPEP       | DNPEP     | 4646.9264   | 3379.610639 | 6133.94581  |   |
| 4502.669567 |           |             |             |             |   |
| CABYR       | CABYR     | 1.041678189 | 23.76907717 | 177.2945617 |   |
| 68.65320621 |           |             |             |             |   |
| B3GAT3      | B3GAT3    | 2409.40165  | 2623.40185  | 1701.581768 |   |
| 2506.822787 |           |             |             |             |   |
| C4orf26     | C4orf26   | 660.4239716 | 259.6991765 | 221.8969671 |   |
| 451.1496408 |           |             |             |             |   |
| SNX24       | SNX24     | 238.5443052 | 244.7334612 | 195.1355238 |   |
| 147.1140133 |           |             |             |             |   |
| DESI1       | DESI1     | 5812.564293 | 4564.543153 | 3526.935211 |   |
| 4019.154843 |           |             |             |             |   |
| ARHGEF17    | ARHGEF17  | 0           | 5.282017149 | 6.690360818 |   |
| 0.980760089 |           |             |             |             |   |
| ORAI3       | ORAI3     | 1153.137755 | 860.088459  | 662.3457209 |   |
| 803.2425126 |           |             |             |             |   |
| ARRDC1      | ARRDC1    | 2246.899853 | 2287.113425 | 2366.157609 |   |
| 2701.013284 |           |             |             |             |   |
| RPS29       | RPS29     | 7228.204951 | 9887.936102 | 12345.94583 |   |
| 9318.201602 |           |             |             |             |   |
| GAGE10      | GAGE10    | 0           | 1.115060136 | 0.980760089 |   |
| AMOT        | AMOT      | 20.83356377 | 14.08537906 | 47.94758586 |   |
| 36.28812328 |           |             |             |             |   |
| SAMD13      | SAMD13    | 6.250069132 | 22.00840479 | 6.690360818 |   |
| 14.71140133 |           |             |             |             |   |
| ZNF213      | ZNF213    | 576.0480384 | 595.1072654 | 515.157783  |   |
| 467.8225623 |           |             |             |             |   |
| CTNNB1      | CTNNB1    | 10171.98751 | 7811.223027 | 9402.187069 |   |
| 7683.274535 |           |             |             |             |   |
| MBOAT4      | MBOAT4    | 25.00027653 | 29.93143051 | 49.062646   |   |
| 32.36508293 |           |             |             |             |   |
| MEX3A       | MEX3A     | 1.041678189 | 2.641008574 | 13.38072164 | 0 |
| KIFC3       | KIFC3     | 16.66685102 | 3.521344766 | 39.02710477 |   |
| 42.17268381 |           |             |             |             |   |
| PSMA4       | PSMA4     | 24702.35657 | 19217.73906 | 17241.05983 |   |
| 16603.28754 |           |             |             |             |   |
| MIR424      | MIR424    | 3.125034566 | 0           | 0           |   |
| MIR194-1    | MIR194-1  | 1.041678189 | 1.041678189 | 1.760672383 | 0 |
| 1.961520177 |           |             |             |             |   |
| SARS        | SARS      | 14422.03452 | 9388.785482 | 19524.70299 |   |
| 12741.05431 |           |             |             |             |   |
| ZBTB38      | ZBTB38    | 2727.113498 | 2233.412918 | 4424.558621 |   |
| 2900.107582 |           |             |             |             |   |
| SSBP3-AS1   | SSBP3-AS1 | 46.09572417 | 34.37538023 | 32.57243908 |   |
| 24.531323   |           |             |             |             |   |
| IBA57-AS1   | IBA57-AS1 | 0           | 4.401680957 | 8.92048109  |   |
| 0           |           |             |             |             |   |

|              |              |             |             |             |
|--------------|--------------|-------------|-------------|-------------|
| SLC26A11     | SLC26A11     |             | 409.3795282 | 350.3738042 |
| 457.1746559  | 459.9764816  |             |             |             |
| SLC41A3      | SLC41A3      | 876.0513567 | 943.7203972 | 1052.616769 |
| 874.8379991  |              |             |             |             |
| ZDHC15       | ZDHC15       | 11.45846008 | 17.60672383 | 53.52288654 |
| 68.65320621  |              |             |             |             |
| FOX06        | FOX06        | 0           | 1.760672383 | 2.230120273 |
|              |              |             |             | 0           |
| LOC101929057 | LOC101929057 |             | 152.0850156 | 228.8874098 |
| 229.7023881  | 168.6907353  |             |             |             |
| BCAP31       | BCAP31       | 10655.32619 | 8412.492645 | 8880.338925 |
| 8244.269305  |              |             |             |             |
| PRSS21       | PRSS21       | 860.4261839 | 200.7166516 | 694.6824649 |
| 135.3448922  |              |             |             |             |
| F2RL2        | F2RL2        | 65.62572589 | 65.14487817 | 33.45180409 |
| 40.21116364  |              |             |             |             |
| E2F2         | E2F2         | 3756.291548 | 8044.512117 | 970.1023186 |
| 1308.333958  |              |             |             |             |
| WDR4         | WDR4         | 2122.940149 | 1517.699594 | 1524.287206 |
| 1763.406639  |              |             |             |             |
| ARHGEF40     | ARHGEF40     |             | 8.33342551  | 13.20504287 |
| 42.37228518  | 21.57672195  |             |             |             |
| BCKDHB       | BCKDHB       | 1317.722909 | 1224.547642 | 1024.740265 |
| 1285.776476  |              |             |             |             |
| NRP2         | NRP2         | 270.8363291 | 154.9391697 | 152.7632387 |
| 56.88408514  |              |             |             |             |
| RNF6         | RNF6         | 7840.711726 | 5844.551975 | 6807.442132 |
| 6494.593307  |              |             |             |             |
| DNAJC12      | DNAJC12      | 257.2945126 | 92.4353001  | 254.2337111 |
| 32.36508293  |              |             |             |             |
| DEPDC4       | DEPDC4       | 51.04223125 | 66.90555055 | 72.47890886 |
| 111.8066501  |              |             |             |             |
| NXPE1        | NXPE1        | 0           | 0           | 0.980760089 |
|              |              | 0           |             | 0           |
| TMEM196      | TMEM196      | 0           | 4.460240545 | 0           |
|              |              | 0           |             |             |
| TCTEX1D2     | TCTEX1D2     |             | 764.5917905 | 792.3025723 |
| 498.4318809  | 579.6292124  |             |             |             |
| C19orf26     | C19orf26     |             | 8.33342551  | 3.521344766 |
| 1.115060136  | 0            |             |             |             |
| FAM69A       | FAM69A       | 4686.510171 | 3187.697349 | 4408.947779 |
| 2079.211388  |              |             |             |             |
| ENTPD5       | ENTPD5       | 551.0477618 | 526.4410425 | 375.7752659 |
| 461.9380018  |              |             |             |             |
| SPATA25      | SPATA25      | 1.041678189 | 0           | 15.61084191 |
|              |              |             |             | 5.884560532 |
| CRTC1        | CRTC1        | 19.79188559 | 47.53815434 | 71.36384872 |
| 47.07648426  |              |             |             |             |
| ZNF717       | ZNF717       | 55.208944   | 85.39261057 | 51.29276627 |
| 119.6527308  |              |             |             |             |
| CAMKK2       | CAMKK2       | 2971.907872 | 3156.005246 | 2484.353984 |
| 2977.587629  |              |             |             |             |
| STAM2        | STAM2        | 1784.394737 | 1254.479073 | 1691.546227 |
| 1262.238234  |              |             |             |             |

|            |            |             |             |             |             |
|------------|------------|-------------|-------------|-------------|-------------|
| CDK5R2     | CDK5R2     | 0           | 0           | 1.115060136 | 0           |
| ADCY3      | ADCY3      | 3732.33295  |             | 4130.53741  | 2652.728064 |
|            |            | 2825.569815 |             |             |             |
| TOP3B      | TOP3B      | 1670.851815 |             | 1758.031374 | 1457.383598 |
|            |            | 1814.406164 |             |             |             |
| FUBP3      | FUBP3      | 3925.043415 |             | 3190.338358 | 3836.921929 |
|            |            | 3579.774324 |             |             |             |
| FBXW2      | FBXW2      | 3953.168726 |             | 4201.844642 | 3754.407479 |
|            |            | 3747.484299 |             |             |             |
| RBMS2      | RBMS2      | 77.08418596 |             | 229.767746  | 131.5770961 |
|            |            | 161.8254146 |             |             |             |
| TRAM2      | TRAM2      | 503.1305651 |             | 601.2696188 | 835.1800421 |
|            |            | 658.0900195 |             |             |             |
| TDG        | TDG        | 4479.216211 |             | 3868.197225 | 2450.90218  |
|            |            | 2713.763165 |             |             |             |
| NEK4       | NEK4       | 1813.561727 |             | 1564.357412 | 1939.089577 |
|            |            | 1720.253196 |             |             |             |
| COCH       | COCH       | 122.9180263 |             | 78.34992104 | 36.7969845  |
|            |            | 75.51852683 |             |             |             |
| TIMM8A     | TIMM8A     | 1059.386718 |             | 927.8743458 | 850.790884  |
|            |            | 957.2218465 |             |             |             |
| DGKB       | DGKB       | 0           | 0           | 2.230120273 | 0           |
| CEP68      | CEP68      | 1615.642871 |             | 1478.084465 | 2591.399757 |
|            |            | 1646.696189 |             |             |             |
| KIF18A     | KIF18A     | 2309.400544 |             | 2249.258969 | 1193.114346 |
|            |            | 1744.772198 |             |             |             |
| CABLES2    | CABLES2    | 2131.273574 |             | 1809.090873 | 1088.298693 |
|            |            | 1286.757236 |             |             |             |
| ABHD17A    | ABHD17A    | 4460.466004 |             | 5319.871605 | 2972.750323 |
|            |            | 4575.245814 |             |             |             |
| PROK1      | PROK1      | 0           | 1.760672383 | 0           | 0           |
| GALNT14    | GALNT14    | 3.125034566 |             | 14.96571525 | 37.91204463 |
|            |            | 14.71140133 |             |             |             |
| ANKRD36BP1 | ANKRD36BP1 |             |             | 56.25062219 | 360.9378385 |
|            |            | 88.08975076 | 78.46080709 |             |             |
| SERINC4    | SERINC4    | 558.3395091 |             | 501.7916291 | 1263.363134 |
|            |            | 837.5691157 |             |             |             |
| HIST1H2BB  | HIST1H2BB  |             |             | 36.4587366  | 169.0245488 |
|            |            | 33.45180409 | 30.40356275 |             |             |
| CCNC       | CCNC       | 6566.739302 |             | 5913.218198 | 5433.688044 |
|            |            | 5473.622055 |             |             |             |
| ZNF507     | ZNF507     | 911.4684151 |             | 1293.213865 | 1331.381803 |
|            |            | 1349.525882 |             |             |             |
| ZFP30      | ZFP30      | 251.0444435 |             | 247.3744698 | 394.7312882 |
|            |            | 303.0548674 |             |             |             |
| UBE2S      | UBE2S      | 18924.16765 |             | 11401.23402 | 8839.0817   |
|            |            | 9043.588778 |             |             |             |
| MDH2       | MDH2       | 20562.72744 |             | 16267.73248 | 14332.98299 |
|            |            | 16946.55357 |             |             |             |
| RAB30      | RAB30      | 335.4203768 |             | 327.4850632 | 803.9583582 |

|                 |              |             |             |             |
|-----------------|--------------|-------------|-------------|-------------|
| 449.1881206     |              |             |             |             |
| RBMS3 RBMS3     | 25.00027653  | 26.41008574 | 26.76144327 |             |
| 73.55700665     |              |             |             |             |
| TIMM22 TIMM22   | 3296.911467  | 2096.080472 | 3196.877411 |             |
| 2492.111385     |              |             |             |             |
| FGF13 FGF13     | 0 0          | 16.72590204 | 0           |             |
| CTC-360P9.3     | CTC-360P9.3  | 0 0         | 0           | 0.980760089 |
| PYGL PYGL       | 14.58349464  | 17.60672383 | 17.84096218 |             |
| 25.49976231     |              |             |             |             |
| FUT3 FUT3       | 0 0          | 1.115060136 | 2.942280266 |             |
| RABEPK RABEPK   | 2704.196578  | 1842.543649 | 2492.159405 |             |
| 2810.858414     |              |             |             |             |
| CBWD1 CBWD1     | 2148.982103  | 1708.732548 | 1875.531149 |             |
| 2062.538466     |              |             |             |             |
| MKLN1 MKLN1     | 3901.084817  | 3971.19656  | 4104.536362 |             |
| 4524.246289     |              |             |             |             |
| KDM8 KDM8       | 530.214198   | 575.7398692 | 551.9547675 |             |
| 474.6878829     |              |             |             |             |
| HSPA4L HSPA4L   | 90.62600242  | 33.45277527 | 62.44336763 |             |
| 67.67244612     |              |             |             |             |
| ACP1 ACP1       | 10306.364    | 7400.986361 | 9949.681596 |             |
| 8233.480944     |              |             |             |             |
| TUFT1 TUFT1     | 246.8777307  | 358.2968299 | 568.6806695 |             |
| 501.1684053     |              |             |             |             |
| ZNF77 ZNF77     | 200.0022122  | 318.6817013 | 394.7312882 |             |
| 547.2641295     |              |             |             |             |
| PHF20L1 PHF20L1 | 4228.171768  | 3553.036869 | 4721.164617 |             |
| 4473.246764     |              |             |             |             |
| LOC101929231    | LOC101929231 | 827.0924818 | 700.7476084 |             |
| 633.3541574     | 582.5714927  |             |             |             |
| LOC101928386    | LOC101928386 | 0 0         | 1.115060136 |             |
| 2.942280266     |              |             |             |             |
| LOC101928371    | LOC101928371 | 679.174179  | 792.3025723 |             |
| 694.6824649     | 608.071255   |             |             |             |
| LOC101928222    | LOC101928222 | 1.041678189 | 1.760672383 |             |
| 6.690360818     | 0            |             |             |             |
| LOC101927492    | LOC101927492 | 1030.219729 | 688.4229017 |             |
| 879.7824475     | 898.3762412  |             |             |             |
| LOC101927482    | LOC101927482 | 1819.811796 | 849.5244247 |             |
| 1332.496863     | 715.9548647  |             |             |             |
| ELMOD2 ELMOD2   | 1158.346146  | 1242.154366 | 1215.415549 |             |
| 1185.738947     |              |             |             |             |
| TMEM219 TMEM219 | 2276.066842  | 2885.742036 | 2444.211819 |             |
| 2526.437988     |              |             |             |             |
| CEP162 CEP162   | 419.79631    | 511.4753272 | 682.4168034 |             |
| 528.6296878     |              |             |             |             |
| NPLOC4 NPLOC4   | 15875.1756   | 12627.54233 | 11092.61824 |             |
| 11322.87522     |              |             |             |             |
| CCNJL CCNJL     | 4.166712755  | 2.641008574 | 0           | 8.826840798 |
| PRDM15 PRDM15   | 527.0891635  | 769.4138313 | 366.8547848 |             |

|              |              |             |             |             |             |
|--------------|--------------|-------------|-------------|-------------|-------------|
| 668.8783805  |              |             |             |             |             |
| GNG3         | GNG3         | 152.0850156 | 199.8363155 | 197.3656441 |             |
| 193.2097375  |              |             |             |             |             |
| NAT6         | NAT6         | 440.6298738 | 419.9203633 | 448.2541748 |             |
| 489.3992842  |              |             |             |             |             |
| JAKMIP2      | JAKMIP2      | 75.00082959 | 151.4178249 | 41.25722504 |             |
| 134.3641321  |              |             |             |             |             |
| COPZ2        | COPZ2        | 130.2097736 | 135.5717735 | 108.1608332 |             |
| 151.0370537  |              |             |             |             |             |
| SENP6        | SENP6        | 4132.337375 | 4034.580765 | 4892.883878 |             |
| 4841.031798  |              |             |             |             |             |
| ISCU         | ISCU         | 6972.993795 | 5677.288099 | 10887.44717 |             |
| 7014.396154  |              |             |             |             |             |
| STX17        | STX17        | 1555.225536 | 1558.195059 | 2462.052781 |             |
| 2062.538466  |              |             |             |             |             |
| RNF34        | RNF34        | 11397.00106 | 8070.041867 | 9271.725033 |             |
| 8684.630585  |              |             |             |             |             |
| FAM169A      | FAM169A      | 578.1313947 | 1174.368479 | 1454.038418 |             |
| 1387.775525  |              |             |             |             |             |
| LTN1         | LTN1         | 3251.077627 | 3999.367318 | 2728.552153 |             |
| 3218.854611  |              |             |             |             |             |
| LINC00639    | LINC00639    |             | 1.041678189 | 0           | 0           |
| RCOR3        | RCOR3        | 2036.480859 | 1811.731882 | 2522.266028 | 0           |
| 1973.289298  |              |             |             |             |             |
| P4HA1        | P4HA1        | 2255.233279 | 2244.857288 | 2270.262437 |             |
| 3293.392378  |              |             |             |             |             |
| KIAA0430     | KIAA0430     |             | 1213.55509  | 2192.917453 |             |
| 1963.6209    | 1417.198328  |             |             |             |             |
| SLC52A2      | SLC52A2      | 5091.722986 | 3090.860368 | 3554.811714 |             |
| 2785.358652  |              |             |             |             |             |
| STXBP2       | STXBP2       | 4617.759411 | 5554.041032 | 3902.710477 |             |
| 4819.455076  |              |             |             |             |             |
| MYRF         | MYRF         | 21.87524196 | 84.51227438 | 0           | 63.74940576 |
| YIF1A        | YIF1A        | 3779.208469 | 3086.458687 | 3407.623776 |             |
| 3469.929194  |              |             |             |             |             |
| ZCWPW2       | ZCWPW2       | 18.7502074  | 12.32470668 | 24.531323   |             |
| 10.78836098  |              |             |             |             |             |
| PRKAR1A      | PRKAR1A      | 24679.43965 | 24150.26274 | 20934.139   |             |
| 23582.37633  |              |             |             |             |             |
| LOC101929441 | LOC101929441 |             | 6.250069132 | 8.803361914 |             |
| 53.52288654  | 26.48052239  |             |             |             |             |
| NSL1         | NSL1         | 3874.001184 | 3621.703092 | 3541.430993 |             |
| 3264.950335  |              |             |             |             |             |
| GSK3A        | GSK3A        | 1139.595938 | 2421.804863 | 1008.014363 |             |
| 1102.37434   |              |             |             |             |             |
| GMNN         | GMNN         | 7526.124913 | 6834.049854 | 3749.947238 |             |
| 4295.729188  |              |             |             |             |             |
| TRIM24       | TRIM24       | 1787.519772 | 2073.191731 | 1305.73542  |             |
| 1642.773149  |              |             |             |             |             |
| MCM5         | MCM5         | 28308.64646 | 25595.77477 | 13797.75413 |             |

|             |             |             |             |             |             |
|-------------|-------------|-------------|-------------|-------------|-------------|
| 19881.96852 |             |             |             |             |             |
| C11orf52    | C11orf52    |             | 4.166712755 | 2.641008574 | 0           |
|             | 5.884560532 |             |             |             |             |
| ZNF689      | ZNF689      | 1973.980168 | 1628.621954 | 2173.252206 |             |
| 1988.0007   |             |             |             |             |             |
| FPGT-TNNI3K | FPGT-TNNI3K |             | 205.2106032 | 116.2043773 |             |
| 147.187938  |             | 174.5752958 |             |             |             |
| MOCOS       | MOCOS       | 7.291747321 | 18.48706002 | 20.07108245 |             |
| 28.44204257 |             |             |             |             |             |
| KIF1C       | KIF1C       | 1137.512582 | 1785.321796 | 1784.096218 |             |
| 1547.63942  |             |             |             |             |             |
| SND1        | SND1        | 16391.84798 | 14097.70377 | 14650.77513 |             |
| 15559.75881 |             |             |             |             |             |
| PELP1       | PELP1       | 390.6293208 | 1626.861282 | 647.8499392 |             |
| 723.8009454 |             |             |             |             |             |
| CCSAP       | CCSAP       | 705.2161337 | 1008.865275 | 856.3661847 |             |
| 801.2809924 |             |             |             |             |             |
| CHMP5       | CHMP5       | 7151.120765 | 5145.565039 | 7141.960173 |             |
| 5269.623956 |             |             |             |             |             |
| SLC35B1     | SLC35B1     | 5305.267015 | 3825.941088 | 3622.830383 |             |
| 3092.33656  |             |             |             |             |             |
| CENPH       | CENPH       | 1785.436415 | 2048.542317 | 1383.789629 |             |
| 1849.713527 |             |             |             |             |             |
| CCDC14      | CCDC14      | 931.2603007 | 1231.590332 | 837.4101623 |             |
| 944.4719654 |             |             |             |             |             |
| CAPNS1      | CAPNS1      | 1281.264172 | 5126.197643 | 1110.599896 |             |
| 1348.545122 |             |             |             |             |             |
| CAPN2       | CAPN2       | 27213.84268 | 19929.93104 | 9818.1045   |             |
| 10254.82749 |             |             |             |             |             |
| RAPGEF4     | RAPGEF4     | 1.041678189 | 0           | 0           | 0           |
| EPHX3       | EPHX3       | 2.083356377 | 5.282017149 | 2.230120273 |             |
| 1.961520177 |             |             |             |             |             |
| COMMD7      | COMMD7      | 5192.765771 | 4084.759928 | 3318.418966 |             |
| 3438.544871 |             |             |             |             |             |
| NT5C3B      | NT5C3B      | 3334.411882 | 1677.920781 | 3090.946698 |             |
| 2204.748679 |             |             |             |             |             |
| AKTIP       | AKTIP       | 3367.745584 | 2566.179998 | 2449.787119 |             |
| 2350.881933 |             |             |             |             |             |
| MINOS1-NBL1 | MINOS1-NBL1 |             | 1979.188559 | 2156.823669 |             |
| 2229.005212 |             | 2108.634191 |             |             |             |
| AK4         | AK4         | 1439.599257 | 1955.226681 | 1342.532404 |             |
| 3749.445819 |             |             |             |             |             |
| MAFB        | MAFB        | 4.166712755 | 32.57243908 | 8.92048109  | 0           |
| GABBR2      | GABBR2      | 0           | 0           | 1.961520177 |             |
| CELA3A      | CELA3A      | 0           | 16.72590204 | 0           |             |
| ZNF263      | ZNF263      | 2641.695887 | 2181.473082 | 3733.221336 |             |
| 2881.473141 |             |             |             |             |             |
| DNAL4       | DNAL4       | 357.2956187 | 396.1512861 | 367.969845  |             |
| 344.2467911 |             |             |             |             |             |
| SPRY4       | SPRY4       | 8.33342551  | 6.16235334  | 0           | 5.884560532 |

|             |             |             |             |             |             |
|-------------|-------------|-------------|-------------|-------------|-------------|
| PTPN3       | PTPN3       | 314.586813  | 1199.017893 | 49.062646   |             |
| 368.7657933 |             |             |             |             |             |
| SMTNL1      | SMTNL1      | 37.50041479 | 44.01680957 | 367.969845  |             |
| 144.171733  |             |             |             |             |             |
| MAP3K9      | MAP3K9      | 285.4198237 | 368.8608642 | 411.4571903 |             |
| 261.8629437 |             |             |             |             |             |
| MIR503HG    | MIR503HG    |             | 4.166712755 | 12.32470668 | 0           |
| 3.923040355 |             |             |             |             |             |
| ZCCHC18     | ZCCHC18     | 54.16726581 | 25.52974955 | 121.5415549 |             |
| 60.8071255  |             |             |             |             |             |
| CD24        | CD24        | 9.375103698 | 6.16235334  | 0           | 2.942280266 |
| CDKN2A      | CDKN2A      | 2541.69478  | 541.4067577 | 504.0071816 |             |
| 194.1904976 |             |             |             |             |             |
| CDK4        | CDK4        | 11736.58815 | 9178.385132 | 11644.573   |             |
| 12509.59493 |             |             |             |             |             |
| CD40LG      | CD40LG      | 19214.79587 | 7580.574944 | 8959.508195 |             |
| 7612.659808 |             |             |             |             |             |
| SLC30A7     | SLC30A7     | 3141.701417 | 3769.599572 | 3810.160486 |             |
| 3221.796891 |             |             |             |             |             |
| PRICKLE1    | PRICKLE1    |             | 40.62544936 | 99.47798963 |             |
| 16.72590204 | 16.67292151 |             |             |             |             |
| MGRN1       | MGRN1       | 486.4637141 | 1419.101941 | 463.8650167 |             |
| 540.3988089 |             |             |             |             |             |
| C21orf58    | C21orf58    |             | 463.546794  | 804.627279  |             |
| 259.8090118 | 416.8230377 |             |             |             |             |
| ZBTB21      | ZBTB21      | 657.2989371 | 950.7630868 | 1663.669723 |             |
| 1404.448447 |             |             |             |             |             |
| TFAP2D      | TFAP2D      | 1.041678189 | 0           | 0           | 0           |
| KREMEN2     | KREMEN2     | 54.16726581 | 69.54655912 | 20.07108245 |             |
| 51.9802847  |             |             |             |             |             |
| ACAN        | ACAN        | 3.125034566 | 7.042689532 | 44.60240545 |             |
| 16.67292151 |             |             |             |             |             |
| TTC24       | TTC24       | 20.83356377 | 232.4087545 | 102.5855325 |             |
| 223.6133002 |             |             |             |             |             |
| VDAC3       | VDAC3       | 29760.74585 | 19573.39488 | 15826.04851 |             |
| 15755.91082 |             |             |             |             |             |
| HHIPL1      | HHIPL1      | 0           | 0           | 11.76912106 |             |
| ELK1        | ELK1        | 1630.226365 | 3029.236835 | 1861.035367 |             |
| 2079.211388 |             |             |             |             |             |
| FAM196B     | FAM196B     | 4.166712755 | 23.76907717 | 7.805420954 |             |
| 3.923040355 |             |             |             |             |             |
| LRRC69      | LRRC69      | 36.4587366  | 38.73479242 | 59.09818722 |             |
| 53.94180488 |             |             |             |             |             |
| DCT         | DCT         | 0           | 0           | 11.76912106 |             |
| CYHR1       | CYHR1       | 746.8832613 | 622.3976873 | 751.5505318 |             |
| 868.9534386 |             |             |             |             |             |
| DHRS2       | DHRS2       | 175.0019357 | 2.641008574 | 167.2590204 |             |
| 54.92256497 |             |             |             |             |             |
| INPPL1      | INPPL1      | 664.5906844 | 3040.681205 | 935.5354543 |             |
| 1172.008306 |             |             |             |             |             |



|          |          |             |             |   |             |
|----------|----------|-------------|-------------|---|-------------|
| RHOBTB1  | RHOBTB1  | 0           | 22.00840479 | 0 | 0.980760089 |
| PPP5C    | PPP5C    | 7026.119383 | 5458.084387 |   | 5102.515184 |
|          |          | 5487.352696 |             |   |             |
| LRRC37A  | LRRC37A  | 52.08390943 | 55.46118006 |   | 57.98312709 |
|          |          | 57.86484523 |             |   |             |
| CCDC96   | CCDC96   | 79.16754234 | 61.6235334  |   | 43.48734531 |
|          |          | 35.30736319 |             |   |             |
| LN2      | LN2      | 941.6770826 | 1083.693852 |   | 1119.520377 |
|          |          | 741.454627  |             |   |             |
| OSBPL5   | OSBPL5   | 19.79188559 | 176.0672383 |   | 16.72590204 |
|          |          | 152.9985738 |             |   |             |
| PRPSAP2  | PRPSAP2  | 2038.564215 | 2130.413583 |   | 2079.587154 |
|          |          | 1644.734669 |             |   |             |
| UBXN8    | UBXN8    | 707.2994901 | 365.3395194 |   | 372.4300855 |
|          |          | 220.67102   |             |   |             |
| SLC25A14 | SLC25A14 |             | 701.049421  |   | 778.2171932 |
|          |          | 478.3607985 | 552.1679299 |   |             |
| N4BP2L2  | N4BP2L2  | 4408.382095 | 4244.100779 |   | 6991.427054 |
|          |          | 6000.290222 |             |   |             |
| KCNMB4   | KCNMB4   | 34.37538023 | 42.25613719 |   | 92.54999131 |
|          |          | 59.82636541 |             |   |             |
| PRPF38A  | PRPF38A  | 9566.772485 | 7437.080145 |   | 7435.220989 |
|          |          | 7058.530358 |             |   |             |
| CADM4    | CADM4    | 1.041678189 | 7.923025723 | 0 | 3.923040355 |
|          |          | C10orf35    | 210.4189941 |   | 133.8111011 |
|          |          | 885.3577482 | 600.2251743 |   |             |
| HIST2H4B | HIST2H4B |             | 1.041678189 |   | 0.880336191 |
|          |          | 2.230120273 | 0           |   |             |
| MICALL2  | MICALL2  | 14.58349464 | 40.49546481 |   | 11.15060136 |
|          |          | 48.05724434 |             |   |             |
| MBP      | MBP      | 4685.468493 | 9519.955574 |   | 5730.29404  |
|          |          | 8408.05624  |             |   |             |
| PLEKHH3  | PLEKHH3  | 47.91719668 | 37.85445623 |   | 14.49578177 |
|          |          | 6.865320621 |             |   |             |
| PPP1R14B | PPP1R14B |             | 5824.022753 |   | 3680.685616 |
|          |          | 5648.89465  | 5158.798066 |   |             |
| ZNF606   | ZNF606   | 239.5859834 | 386.467588  |   | 638.9294581 |
|          |          | 627.6864567 |             |   |             |
| ANKRD34A | ANKRD34A |             | 84.37593328 |   | 58.10218863 |
|          |          | 115.9662542 | 188.305937  |   |             |
| MECP2    | MECP2    | 1063.553431 | 1396.2132   |   | 1336.957103 |
|          |          | 882.6840798 |             |   |             |
| HIF1A    | HIF1A    | 13804.31936 | 18927.22812 |   | 21121.4691  |
|          |          | 33792.08886 |             |   |             |
| TSPAN4   | TSPAN4   | 338.5454113 | 498.2702844 |   | 171.719261  |
|          |          | 285.4011858 |             |   |             |
| CLLU10S  | CLLU10S  | 0           | 3.345180409 | 0 | 0.980760089 |
| CHI3L2   | CHI3L2   | 120.8346699 | 185.7509364 |   | 734.8246298 |
|          |          | 462.9187619 |             |   |             |
| VMAC     | VMAC     | 128.1264172 | 128.529084  |   | 151.6481785 |

|             |             |             |             |             |             |
|-------------|-------------|-------------|-------------|-------------|-------------|
| 125.5372913 |             |             |             |             |             |
| RASSF5      | RASSF5      | 37996.25361 | 28167.23678 | 24286.00977 |             |
| 34051.99028 |             |             |             |             |             |
| CREM        | CREM        | 11615.75348 | 5172.855461 | 10315.42132 |             |
| 7896.099474 |             |             |             |             |             |
| FILIP1L     | FILIP1L     | 423.9630228 | 163.7425316 | 76.9391494  |             |
| 45.11496408 |             |             |             |             |             |
| TMEM191B    | TMEM191B    |             | 3.125034566 | 0.880336191 |             |
| 16.72590204 | 0.980760089 |             |             |             |             |
| FAM131C     | FAM131C     | 48.95887487 | 9.683698106 | 40.14216491 |             |
| 29.42280266 |             |             |             |             |             |
| WASH1       | WASH1       | 140.6265555 | 255.2974955 | 120.4264947 |             |
| 157.9023743 |             |             |             |             |             |
| ZFP2        | ZFP2        | 10.41678189 | 0.880336191 | 49.062646   |             |
| 19.61520177 |             |             |             |             |             |
| PPFIBP2     | PPFIBP2     | 396.8793899 | 109.1616877 | 1312.42578  |             |
| 340.3237508 |             |             |             |             |             |
| TMEM204     | TMEM204     | 2368.776201 | 1913.85088  | 1553.27877  |             |
| 1679.061272 |             |             |             |             |             |
| APOL4       | APOL4       | 521.8807725 | 6.16235334  | 111.5060136 |             |
| 20.59596186 |             |             |             |             |             |
| MIR4678     | MIR4678     | 0           | 1.760672383 | 0           | 2.942280266 |
| MIR4677     | MIR4677     | 2.083356377 | 2.641008574 | 1.115060136 | 0           |
| MIR4676     | MIR4676     | 1.041678189 | 0           | 0           | 0           |
| WNK2        | WNK2        | 0           | 5.282017149 | 5.575300681 | 9.807600887 |
| HIST1H1E    | HIST1H1E    |             | 1179.17971  | 2060.867024 |             |
| 1249.982413 | 967.0294474 |             |             |             |             |
| ZNF232      | ZNF232      | 739.591514  | 694.585255  | 1305.73542  |             |
| 1121.008781 |             |             |             |             |             |
| CNOT3       | CNOT3       | 654.1739025 | 1668.237083 | 865.2866657 |             |
| 767.9351494 |             |             |             |             |             |
| DECR1       | DECR1       | 5914.648755 | 6948.493559 | 3665.202668 |             |
| 4566.418973 |             |             |             |             |             |
| DHX15       | DHX15       | 20416.8925  | 17124.2996  | 15768.06539 |             |
| 17965.5633  |             |             |             |             |             |
| TNFSF14     | TNFSF14     | 1353.139967 | 897.0625791 | 2019.373907 |             |
| 3084.490479 |             |             |             |             |             |
| MRPL36      | MRPL36      | 3056.283806 | 3448.276862 | 2392.919052 |             |
| 2972.683829 |             |             |             |             |             |
| MRPL38      | MRPL38      | 5537.561251 | 3922.778069 | 3967.383965 |             |
| 3874.98311  |             |             |             |             |             |
| CEP192      | CEP192      | 1201.054952 | 2263.344348 | 1528.747447 |             |
| 1509.389776 |             |             |             |             |             |
| TRIM13      | TRIM13      | 1078.136925 | 1052.001749 | 1326.921562 |             |
| 1329.91068  |             |             |             |             |             |
| ZNF773      | ZNF773      | 434.3798047 | 462.1765005 | 992.4035213 |             |
| 697.320423  |             |             |             |             |             |
| TMEM205     | TMEM205     | 1304.181092 | 1445.512026 | 1362.603487 |             |
| 1487.813055 |             |             |             |             |             |
| HSD11B1L    | HSD11B1L    |             | 50.00055306 | 44.89714576 |             |

|                 |             |               |             |  |
|-----------------|-------------|---------------|-------------|--|
| 72.47890886     | 116.7104506 |               |             |  |
| ATP9B ATP9B     | 1141.679295 | 1052.882085   | 1173.043263 |  |
| 1245.565313     |             |               |             |  |
| ARID3A ARID3A   | 210.4189941 | 347.7327956   | 120.4264947 |  |
| 112.7874102     |             |               |             |  |
| LRP2BP LRP2BP   | 28.12531109 | 71.30723151   | 75.82408927 |  |
| 38.24964346     |             |               |             |  |
| TMEM184B        | TMEM184B    | 3481.288507   | 2935.921198 |  |
| 2283.643159     | 2822.627535 |               |             |  |
| TTLL1 TTLL1     | 311.4617784 | 290.5109432   | 229.7023881 |  |
| 382.4964346     |             |               |             |  |
| PMPCB PMPCB     | 6992.785681 | 5771.484071   | 5818.383791 |  |
| 6250.384045     |             |               |             |  |
| PAXBP1 PAXBP1   | 2552.111562 | 2431.488561   | 2663.878666 |  |
| 2450.919462     |             |               |             |  |
| TMEM171 TMEM171 | 0 0         | 0 6.865320621 |             |  |
| CDC45 CDC45     | 8389.676132 | 7229.320804   | 4417.86826  |  |
| 5948.309938     |             |               |             |  |
| CPT2 CPT2       | 2876.073479 | 2670.940005   | 2551.257592 |  |
| 3321.83442      |             |               |             |  |
| DDB2 DDB2       | 8038.630582 | 4951.010741   | 6421.631325 |  |
| 5679.581673     |             |               |             |  |
| ADCY1 ADCY1     | 136.4598427 | 95.07630868   | 46.83252572 |  |
| 81.40308736     |             |               |             |  |
| ATG4D ATG4D     | 1637.518113 | 1475.443457   | 1246.637232 |  |
| 1285.776476     |             |               |             |  |
| PHB PHB         | 15414.75384 | 10018.22586   | 12750.71266 |  |
| 13641.39207     |             |               |             |  |
| PDE6B PDE6B     | 87.50096785 | 259.6991765   | 372.4300855 |  |
| 597.282894      |             |               |             |  |
| PIK3CD PIK3CD   | 21621.07248 | 25481.33106   | 15210.53532 |  |
| 18102.86972     |             |               |             |  |
| PAPSS2 PAPSS2   | 127.084739  | 124.127403    | 76.9391494  |  |
| 384.4579548     |             |               |             |  |
| DDX19B DDX19B   | 3116.701141 | 2567.94067    | 2420.795556 |  |
| 2546.05319      |             |               |             |  |
| SUGP2 SUGP2     | 2069.814561 | 3400.738708   | 1933.514276 |  |
| 2303.805448     |             |               |             |  |
| EIF6 EIF6       | 11136.58152 | 7885.171267   | 9107.811193 |  |
| 9015.146735     |             |               |             |  |
| RSBN1L RSBN1L   | 1220.846837 | 1243.915039   | 1310.19566  |  |
| 1284.795716     |             |               |             |  |
| MIR21 MIR21     | 31.25034566 | 47.53815434   | 44.60240545 |  |
| 33.34584301     |             |               |             |  |
| BACH1-IT2       | BACH1-IT2   | 3.125034566   | 0 0         |  |
| 0.980760089     |             |               |             |  |
| SPATC1 SPATC1   | 1.041678189 | 0.880336191   | 6.690360818 |  |
| 2.942280266     |             |               |             |  |
| PIGA PIGA       | 1301.056058 | 1289.69252    | 1243.292052 |  |
| 1219.08479      |             |               |             |  |

|                   |                 |               |             |
|-------------------|-----------------|---------------|-------------|
| MYRIP MYRIP       | 7.291747321     | 3.521344766   | 1.115060136 |
| 8.826840798       |                 |               |             |
| C16orf93 C16orf93 | 90.62600242     | 67.78588674   |             |
| 66.90360818       | 82.38384745     |               |             |
| DNAJA4 DNAJA4     | 2035.439181     | 2185.874763   | 1733.918512 |
| 1867.367209       |                 |               |             |
| SPNS2 SPNS2       | 780.2169633     | 852.1654333   | 898.7384698 |
| 878.7610394       |                 |               |             |
| LEMD3 LEMD3       | 2785.447477     | 2994.903723   | 3583.803278 |
| 2903.049862       |                 |               |             |
| NRSN1 NRSN1       | 0 0             | 1.115060136   | 0           |
| NDRG2 NDRG2       | 83.3342551      | 115.3240411   | 710.2933068 |
| 562.9562909       |                 |               |             |
| TMBIM4 TMBIM4     | 6939.660093     | 7488.139644   | 6106.069306 |
| 6995.761712       |                 |               |             |
| MAPT-IT1 MAPT-IT1 | 0 0             | 0 0.980760089 |             |
| IFT80 IFT80       | 793.7587798     | 1076.651162   | 725.9041487 |
| 930.7413241       |                 |               |             |
| ENDOU ENDOU       | 7.291747321     | 1.760672383   | 33.45180409 |
| 9.807600887       |                 |               |             |
| TRAPPC9 TRAPPC9   | 772.925216      | 1210.462263   | 980.1378598 |
| 1125.912582       |                 |               |             |
| LILRB1 LILRB1     | 0 1.760672383 0 | 3.923040355   |             |
| ZSWIM7 ZSWIM7     | 439.5881956     | 529.9623872   | 777.196915  |
| 690.4551024       |                 |               |             |
| TCN2 TCN2         | 191.6687867     | 114.4437049   | 65.78854804 |
| 61.78788559       |                 |               |             |
| SAA4 SAA4         | 0 0             | 2.230120273   | 0           |
| GOLT1A GOLT1A     | 0 0             | 0 8.826840798 |             |
| NRN1L NRN1L       | 5.208390943     | 9.683698106   | 21.18614259 |
| 4.903800443       |                 |               |             |
| DERL3 DERL3       | 314.586813      | 249.1351422   | 140.4975772 |
| 257.9399033       |                 |               |             |
| KBTBD3 KBTBD3     | 670.8407535     | 779.9778656   | 751.5505318 |
| 708.108784        |                 |               |             |
| TFAM TFAM         | 4255.255401     | 4117.332367   | 4504.842951 |
| 4721.379067       |                 |               |             |
| PITPNM1 PITPNM1   | 5022.972226     | 8159.836158   | 3342.950289 |
| 6870.224421       |                 |               |             |
| SP4 SP4           | 1868.770671     | 2839.964554   | 2070.666673 |
| 1069.028497       |                 |               |             |
| GAPVD1 GAPVD1     | 6695.907397     | 6268.874019   | 6365.878318 |
| 6508.323948       |                 |               |             |
| F2RL3 F2RL3       | 203.1272468     | 103.8796706   | 5.575300681 |
| 6.865320621       |                 |               |             |
| BCL2L2 BCL2L2     | 31.25034566     | 7.042689532   | 1.115060136 |
| 4.903800443       |                 |               |             |
| B2M B2M           | 480865.7355     | 452513.9305   | 814714.2283 |
| 523104.0855       |                 |               |             |
| MTMR7 MTMR7       | 94.79271517     | 96.83698106   | 84.74457036 |

|                 |               |  |             |               |
|-----------------|---------------|--|-------------|---------------|
| 114.7489304     |               |  |             |               |
| HNRNPA2B1       | HNRNPA2B1     |  | 88472.8536  | 95073.66767   |
| 74238.47375     | 84583.69233   |  |             |               |
| SNORD114-25     | SNORD114-25   |  | 0 0         | 0 1.961520177 |
| SLC38A9 SLC38A9 | 1870.854027   |  | 1424.383958 | 1328.036622   |
| 1164.162225     |               |  |             |               |
| AGAP1 AGAP1     | 0 12.32470668 |  | 0           | 17.6536816    |
| ZNF501 ZNF501   | 86.45928966   |  | 49.29882672 | 198.4807043   |
| 164.7676949     |               |  |             |               |
| ACTN2 ACTN2     | 1.041678189   |  | 5.282017149 | 4.460240545   |
| 5.884560532     |               |  |             |               |
| RYR2 RYR2       | 20.83356377   |  | 9.683698106 | 32.33674395   |
| 5.884560532     |               |  |             |               |
| MCTP1 MCTP1     | 14.58349464   |  | 57.22185244 | 13.38072164   |
| 16.67292151     |               |  |             |               |
| CCDC159 CCDC159 | 163.5434756   |  | 203.3576602 | 309.9867179   |
| 324.6315893     |               |  |             |               |
| C11orf57        | C11orf57      |  | 1088.553707 | 1119.787636   |
| 1164.122782     | 1069.028497   |  |             |               |
| TMEM8B TMEM8B   | 48.95887487   |  | 114.4437049 | 195.1355238   |
| 145.1524931     |               |  |             |               |
| WDR33 WDR33     | 6500.071897   |  | 7570.01091  | 6716.007201   |
| 6763.321571     |               |  |             |               |
| RBM12 RBM12     | 7763.62754    |  | 8695.080563 | 7518.850499   |
| 7900.022514     |               |  |             |               |
| SELP SELP       | 61.45901313   |  | 25.52974955 | 320.0222591   |
| 79.44156718     |               |  |             |               |
| SASH1 SASH1     | 128.1264172   |  | 80.11059342 | 37.91204463   |
| 50.99952461     |               |  |             |               |
| CTC1 CTC1       | 2244.816497   |  | 2409.480156 | 3607.219541   |
| 3194.335609     |               |  |             |               |
| SPTBN4 SPTBN4   | 7.291747321   |  | 10.5640343  | 36.7969845    |
| 27.46128248     |               |  |             |               |
| DTX1 DTX1       | 12.50013826   |  | 5.282017149 | 140.4975772   |
| 161.8254146     |               |  |             |               |
| ARHGAP35        | ARHGAP35      |  | 764.5917905 | 1940.260966   |
| 811.7637792     | 1015.086692   |  |             |               |
| UTP14A UTP14A   | 2788.572511   |  | 1701.689858 | 2676.144327   |
| 2283.209486     |               |  |             |               |
| RCAN1 RCAN1     | 1634.393078   |  | 1636.54498  | 1936.859457   |
| 1714.368635     |               |  |             |               |
| DMPK DMPK       | 70.83411683   |  | 73.94824008 | 74.70902913   |
| 79.44156718     |               |  |             |               |
| STARD10 STARD10 | 591.6732112   |  | 847.7637524 | 711.4083669   |
| 823.8384745     |               |  |             |               |
| UBN2 UBN2       | 245.8360525   |  | 290.5109432 | 229.7023881   |
| 237.3439415     |               |  |             |               |
| ZDHHC23 ZDHHC23 | 38.54209298   |  | 64.26454197 | 95.89517172   |
| 135.3448922     |               |  |             |               |
| KLHL2 KLHL2     | 4917.762729   |  | 2682.384375 | 3542.546053   |

|              |              |             |             |             |             |  |
|--------------|--------------|-------------|-------------|-------------|-------------|--|
| 3395.391427  |              |             |             |             |             |  |
| IL18R1       | IL18R1       | 3512.538852 | 1949.064328 | 3127.743682 |             |  |
| 3550.351521  |              |             |             |             |             |  |
| CLCN4        | CLCN4        | 35.41705842 | 3.521344766 | 11.15060136 | 0           |  |
| FAM189B      | FAM189B      | 71.87579502 | 358.2968299 | 114.851194  |             |  |
| 141.2294528  |              |             |             |             |             |  |
| P2RX1        | P2RX1        | 4.166712755 | 32.57243908 | 0           | 4.903800443 |  |
| OSBP         | OSBP         | 6183.401728 | 5727.467261 | 8695.238943 |             |  |
| 6773.129172  |              |             |             |             |             |  |
| CPNE4        | CPNE4        | 4.166712755 | 0.880336191 | 2.230120273 |             |  |
| 1.961520177  |              |             |             |             |             |  |
| PRKAG1       | PRKAG1       | 4721.927229 | 3347.0382   | 3335.144868 |             |  |
| 3395.391427  |              |             |             |             |             |  |
| ME3          | ME3          | 108.3345316 | 147.8964802 | 70.24878858 |             |  |
| 126.5180514  |              |             |             |             |             |  |
| HCG18        | HCG18        | 175.0019357 | 21.12806859 | 200.7108245 |             |  |
| 50.99952461  |              |             |             |             |             |  |
| PCIF1        | PCIF1        | 4012.544383 | 3659.557548 | 4444.629703 |             |  |
| 4159.403536  |              |             |             |             |             |  |
| NSFP1        | NSFP1        | 204.168925  | 113.5633687 | 211.8614259 |             |  |
| 152.0178137  |              |             |             |             |             |  |
| TAF6         | TAF6         | 3767.750009 | 4410.484319 | 3224.753914 |             |  |
| 4179.018738  |              |             |             |             |             |  |
| PLXNB2       | PLXNB2       | 383.3375734 | 394.3906138 | 815.1089596 |             |  |
| 473.7071228  |              |             |             |             |             |  |
| PPTC7        | PPTC7        | 2230.233002 | 2791.546063 | 3158.965366 |             |  |
| 2575.475993  |              |             |             |             |             |  |
| RHOXF1       | RHOXF1       | 0           | 0           | 1.961520177 |             |  |
| DCUN1D5      | DCUN1D5      | 4645.884722 | 3533.669472 | 3416.544258 |             |  |
| 3176.681927  |              |             |             |             |             |  |
| C9orf64      | C9orf64      | 2239.608106 | 2062.627697 | 1849.884766 |             |  |
| 1987.01994   |              |             |             |             |             |  |
| GARNL3       | GARNL3       | 11.45846008 | 20.2477324  | 23.41626286 |             |  |
| 26.48052239  |              |             |             |             |             |  |
| AKAP13       | AKAP13       | 7528.20827  | 13724.44122 | 10138.12676 |             |  |
| 10998.24363  |              |             |             |             |             |  |
| MAGI3        | MAGI3        | 392.7126771 | 567.8168435 | 450.4842951 |             |  |
| 432.5151991  |              |             |             |             |             |  |
| CHST13       | CHST13       | 1.041678189 | 0           | 1.115060136 | 0           |  |
| COL22A1      | COL22A1      | 0           | 0           | 0.980760089 |             |  |
| OXER1        | OXER1        | 11.45846008 | 3.521344766 | 11.15060136 |             |  |
| 4.903800443  |              |             |             |             |             |  |
| TCTN1        | TCTN1        | 343.7538023 | 308.117667  | 323.3674395 |             |  |
| 347.1890714  |              |             |             |             |             |  |
| ANTXRLP1     | ANTXRLP1     |             | 82.29257691 | 161.101523  |             |  |
| 73.59396899  |              |             |             |             |             |  |
| LOC101928790 | LOC101928790 |             | 2.083356377 | 0.880336191 | 0           |  |
| 0            |              |             |             |             |             |  |
| ADAMTS8      | ADAMTS8      | 1.041678189 | 2.641008574 | 2.230120273 | 0           |  |
| SNX1         | SNX1         | 8361.550821 | 7344.644845 | 6285.593988 |             |  |

|                 |               |             |             |             |             |  |
|-----------------|---------------|-------------|-------------|-------------|-------------|--|
| 7410.62323      |               |             |             |             |             |  |
| LEMD1-AS1       | LEMD1-AS1     | 0           | 0.880336191 | 0           | 0           |  |
| LINC00624       | LINC00624     | 0           | 0           | 0           | 0.980760089 |  |
| LOC100507346    | LOC100507346  | 5.208390943 |             | 16.72638764 |             |  |
| 43.48734531     | 32.36508293   |             |             |             |             |  |
| LINC01281       | LINC01281     | 465.6301503 |             | 580.1415502 |             |  |
| 792.8077569     | 1435.83277    |             |             |             |             |  |
| FRMD6-AS2       | FRMD6-AS2     | 0           | 0           | 0           | 0.980760089 |  |
| COA1 COA1       | 2388.568087   | 2864.613967 |             | 2156.526304 |             |  |
| 2539.18787      |               |             |             |             |             |  |
| ATP12A ATP12A   | 38.54209298   | 9.683698106 |             | 33.45180409 |             |  |
| 10.78836098     |               |             |             |             |             |  |
| BCAS1 BCAS1     | 1.041678189   | 9.683698106 |             | 23.41626286 |             |  |
| 9.807600887     |               |             |             |             |             |  |
| CST7 CST7       | 1879.187452   | 2756.332615 |             | 725.9041487 |             |  |
| 1422.102129     |               |             |             |             |             |  |
| C2orf40 C2orf40 | 0 0           | 13.38072164 |             | 2.942280266 |             |  |
| BAZ1B BAZ1B     | 6922.993242   | 7731.992769 |             | 6759.494546 |             |  |
| 6185.653879     |               |             |             |             |             |  |
| KIAA1683        | KIAA1683      | 5.208390943 |             | 5.282017149 |             |  |
| 7.805420954     | 10.78836098   |             |             |             |             |  |
| TTYH3 TTYH3     | 239.5859834   | 1228.068987 |             | 285.4553949 |             |  |
| 443.3035601     |               |             |             |             |             |  |
| TMPRSS11B       | TMPRSS11B     | 0           | 0.880336191 | 0           | 0           |  |
| WDR61 WDR61     | 5101.09809    | 3935.983112 |             | 3824.656267 |             |  |
| 4233.941303     |               |             |             |             |             |  |
| LRRC8A LRRC8A   | 10354.2812    | 7179.141641 |             | 4055.473716 |             |  |
| 3885.771471     |               |             |             |             |             |  |
| ATP2B3 ATP2B3   | 1.041678189   | 0           | 0           | 0           |             |  |
| CWF19L2 CWF19L2 | 469.7968631   | 578.3808778 |             | 989.0583409 |             |  |
| 615.9173357     |               |             |             |             |             |  |
| TNS1 TNS1       | 57.29230038   | 2.641008574 |             | 32.33674395 |             |  |
| 27.46128248     |               |             |             |             |             |  |
| VPS16 VPS16     | 4226.088412   | 3604.976704 |             | 2876.855152 |             |  |
| 3864.194749     |               |             |             |             |             |  |
| GIGYF1 GIGYF1   | 95.83439336   | 472.7405348 |             | 248.6584104 |             |  |
| 235.3824213     |               |             |             |             |             |  |
| RAP1A RAP1A     | 5481.310629   | 6157.071323 |             | 4973.168208 |             |  |
| 4641.9375       |               |             |             |             |             |  |
| H00K2 H00K2     | 69.79243864   | 145.2554716 |             | 122.656615  |             |  |
| 165.748455      |               |             |             |             |             |  |
| FCER2 FCER2     | 71.87579502   | 0           | 186.2150428 | 5.884560532 |             |  |
| PRKDC PRKDC     | 8026.130444   | 14676.08465 |             | 7168.721616 |             |  |
| 7644.044131     |               |             |             |             |             |  |
| MAD2L1BP        | MAD2L1BP      | 3828.167343 |             | 3171.851298 |             |  |
| 3241.479816     | 2922.665064   |             |             |             |             |  |
| PEG3 PEG3       | 0 1.760672383 | 0           |             | 1.961520177 |             |  |
| SLC26A4 SLC26A4 | 533.3392326   | 181.3492554 |             | 228.5873279 |             |  |
| 147.1140133     |               |             |             |             |             |  |
| ITGA6 ITGA6     | 682.2992136   | 1346.914373 |             | 2131.994981 |             |  |

|                |                |             |             |             |
|----------------|----------------|-------------|-------------|-------------|
| 1458.390252    |                |             |             |             |
| CCDC169-SOHLH2 | CCDC169-SOHLH2 | 6.250069132 | 8.803361914 |             |
| 2.230120273    | 5.884560532    |             |             |             |
| TIMP1          | TIMP1          | 2690.654761 | 2457.01831  | 1584.500454 |
| 3606.254846    |                |             |             |             |
| TIAM1          | TIAM1          | 2907.323825 | 4061.871187 | 5247.473001 |
| 5927.713976    |                |             |             |             |
| HLTF           | HLTF           | 1667.72678  | 2250.139305 | 1722.767911 |
| 1964.462458    |                |             |             |             |
| RPL22          | RPL22          | 2733.363567 | 3002.826749 | 2856.784069 |
| 2778.493331    |                |             |             |             |
| EIF2S2         | EIF2S2         | 5580.270057 | 5059.292092 | 4326.433329 |
| 4466.381444    |                |             |             |             |
| FZD2           | FZD2           | 0           | 0.880336191 | 1.115060136 |
| 0              |                |             |             | 0           |
| CHURC1-FNTB    | CHURC1-FNTB    | 4585.467387 | 4124.375057 |             |
| 5337.792872    | 4603.687856    |             |             |             |
| PSMA6          | PSMA6          | 27174.25891 | 21090.21414 | 23800.95861 |
| 20947.07397    |                |             |             |             |
| PSMA1          | PSMA1          | 28888.86121 | 22676.57996 | 19384.20541 |
| 20790.15236    |                |             |             |             |
| MAP7D2         | MAP7D2         | 15.62517283 | 59.86286102 | 24.531323   |
| 40.21116364    |                |             |             |             |
| RASIP1         | RASIP1         | 2.083356377 | 66.02521436 | 1.115060136 |
| 55.90332505    |                |             |             |             |
| LAT2           | LAT2           | 841.6759765 | 1318.743615 | 148.3029981 |
| 509.9952461    |                |             |             |             |
| GEMIN6         | GEMIN6         | 1986.480306 | 1550.272033 | 1594.535995 |
| 1661.40759     |                |             |             |             |
| TBP            | TBP            | 2791.697546 | 2162.105686 | 2330.475685 |
| 2643.148439    |                |             |             |             |
| NPL            | NPL            | 523.9641289 | 342.4507785 | 521.8481438 |
| 429.5729188    |                |             |             |             |
| GRAMD1A        | GRAMD1A        | 1803.144945 | 2213.165185 | 2945.98888  |
| 2897.165302    |                |             |             |             |
| NEK11          | NEK11          | 13.54181645 | 15.84605145 | 80.28432981 |
| 77.480047      |                |             |             |             |
| GPN1           | GPN1           | 7522.999879 | 5602.459522 | 4976.513388 |
| 5177.432508    |                |             |             |             |
| IFI44L         | IFI44L         | 1009.386165 | 326.604727  | 12158.61573 |
| 3251.219694    |                |             |             |             |
| ROM1           | ROM1           | 84.37593328 | 58.98252483 | 143.8427576 |
| 104.9413295    |                |             |             |             |
| FBXL13         | FBXL13         | 9.375103698 | 11.44437049 | 27.87650341 |
| 31.38432284    |                |             |             |             |
| NDC1           | NDC1           | 7143.829018 | 5912.337862 | 4863.892314 |
| 4970.492129    |                |             |             |             |
| CDKN2C         | CDKN2C         | 2662.52945  | 1778.279107 | 986.8282206 |
| 947.4142457    |                |             |             |             |
| KAT6A          | KAT6A          | 1987.521984 | 3738.787805 | 3288.312342 |
| 2620.590957    |                |             |             |             |



|              |              |             |             |             |             |   |
|--------------|--------------|-------------|-------------|-------------|-------------|---|
| CD163        | CD163        | 0           | 0           | 2.230120273 | 2.942280266 |   |
| NFIB         | NFIB         | 0           | 0.880336191 | 2.230120273 | 0           |   |
| RND1         | RND1         | 171.8769011 |             | 200.7166516 | 223.0120273 |   |
| 95.1337286   |              |             |             |             |             |   |
| SUPT20H      | SUPT20H      | 5711.521509 |             | 5838.389622 | 5067.948319 |   |
| 5244.124194  |              |             |             |             |             |   |
| ZFAND4       | ZFAND4       | 1043.761545 |             | 807.2682875 | 1142.93664  |   |
| 942.5104452  |              |             |             |             |             |   |
| LRP10        | LRP10        | 5026.09726  |             | 7700.300667 | 6506.375895 |   |
| 6485.766466  |              |             |             |             |             |   |
| FAM172A      | FAM172A      | 1013.552878 |             | 934.9170353 | 1058.192069 |   |
| 1264.199754  |              |             |             |             |             |   |
| BARD1        | BARD1        | 2703.1549   |             | 3230.833823 | 1799.70706  |   |
| 2139.037753  |              |             |             |             |             |   |
| HOXA7        | HOXA7        | 0           | 5.282017149 | 0           | 0.980760089 |   |
| FAM134A      | FAM134A      | 2093.773159 |             | 3363.764587 | 3291.657522 |   |
| 2965.818508  |              |             |             |             |             |   |
| TMEM248      | TMEM248      | 10988.66321 |             | 9371.178758 | 10736.91405 |   |
| 9541.814903  |              |             |             |             |             |   |
| INHBB        | INHBB        | 0           | 0           | 0           | 0.980760089 |   |
| LOC101928694 | LOC101928694 |             |             | 0           | 3.521344766 | 0 |
| SNORA2B      | SNORA2B      | 14.58349464 |             | 14.96571525 | 8.92048109  |   |
| 13.73064124  |              |             |             |             |             |   |
| SNORA2A      | SNORA2A      | 0           | 0.880336191 | 0           | 0           |   |
| SNORA6       | SNORA6       | 25.00027653 |             | 22.88874098 | 28.99156354 |   |
| 12.74988115  |              |             |             |             |             |   |
| SHF          | SHF          | 205.2106032 |             | 129.4094201 | 585.4065715 |   |
| 397.2078359  |              |             |             |             |             |   |
| TPCN1        | TPCN1        | 996.8860266 |             | 1554.673714 | 1410.551072 |   |
| 2005.654381  |              |             |             |             |             |   |
| GPR87        | GPR87        | 17.70852921 |             | 28.17075813 | 11.15060136 |   |
| 23.53824213  |              |             |             |             |             |   |
| GRHL3        | GRHL3        | 0           | 22.00840479 | 0           | 8.826840798 |   |
| HRASLS       | HRASLS       | 0           | 0.880336191 | 0           | 0           |   |
| PFKL         | PFKL         | 13167.85398 |             | 17450.90432 | 7741.862526 |   |
| 13287.33768  |              |             |             |             |             |   |
| SPPL2B       | SPPL2B       | 697.9243864 |             | 1087.215196 | 606.5927141 |   |
| 747.3391876  |              |             |             |             |             |   |
| LZIC         | LZIC         | 1373.973531 |             | 1118.026963 | 1202.034827 |   |
| 1160.239185  |              |             |             |             |             |   |
| KTI12        | KTI12        | 2129.190218 |             | 1535.306318 | 2063.976312 |   |
| 1877.17481   |              |             |             |             |             |   |
| PHF21B       | PHF21B       | 0           | 0.880336191 | 0           | 0           |   |
| CNBD2        | CNBD2        | 6.250069132 |             | 6.16235334  | 1.115060136 |   |
| 7.846080709  |              |             |             |             |             |   |
| SMEK2        | SMEK2        | 10275.11365 |             | 10093.05443 | 11315.63026 |   |
| 10188.1358   |              |             |             |             |             |   |
| GLIPR1L1     | GLIPR1L1     |             |             | 2.083356377 | 5.282017149 |   |
| 5.575300681  |              | 7.846080709 |             |             |             |   |
| HERC1        | HERC1        | 1605.226089 |             | 2494.872767 | 3636.211104 |   |

|              |              |             |             |             |
|--------------|--------------|-------------|-------------|-------------|
| 2562.726112  |              |             |             |             |
| C1R          | C1R          | 225.0024888 | 371.5018728 | 138.2674569 |
| 157.9023743  |              |             |             |             |
| TEX21P       | TEX21P       | 12.50013826 | 16.72638764 | 5.575300681 |
| 12.74988115  |              |             |             |             |
| MIR3960      | MIR3960      | 0           | 2.641008574 | 3.345180409 |
| 1.961520177  |              |             |             |             |
| GADD45A      | GADD45A      | 2272.941808 | 992.1388878 | 2427.485917 |
| 1263.218994  |              |             |             |             |
| CHTOP        | CHTOP        | 6456.321414 | 4975.660154 | 5955.536188 |
| 5592.294026  |              |             |             |             |
| LARP1B       | LARP1B       | 620.8402005 | 660.2521436 | 724.7890886 |
| 716.9356248  |              |             |             |             |
| RFK          | RFK          | 4337.547978 | 2909.511113 | 2662.763605 |
| 2045.865545  |              |             |             |             |
| SYN1         | SYN1         | 79.16754234 | 61.6235334  | 57.98312709 |
| 73.55700665  |              |             |             |             |
| TRAF2        | TRAF2        | 5949.024136 | 4408.723647 | 4885.078457 |
| 5025.414694  |              |             |             |             |
| PDK3         | PDK3         | 3659.415477 | 4892.908552 | 3974.074326 |
| 5325.527281  |              |             |             |             |
| SCOC-AS1     | SCOC-AS1     |             | 84.37593328 | 54.58084387 |
| 139.382517   |              | 86.3068878  |             |             |
| LOC100132077 | LOC100132077 |             | 29.16698928 | 40.49546481 |
| 12.2656615   |              | 11.76912106 |             |             |
| PIGY         | PIGY         | 8515.719193 | 5671.125745 | 10522.82251 |
| 7042.838197  |              |             |             |             |
| LOC101927055 | LOC101927055 |             | 5.208390943 | 8.803361914 |
| 2.230120273  |              | 1.961520177 |             |             |
| ZNF79        | ZNF79        | 795.8421362 | 752.6874437 | 1181.963744 |
| 788.5311113  |              |             |             |             |
| PPP3CA       | PPP3CA       | 410.4212063 | 1111.86461  | 515.157783  |
| 357.9774324  |              |             |             |             |
| AFMID        | AFMID        | 377.0875043 | 397.9119585 | 284.3403347 |
| 180.4598563  |              |             |             |             |
| SUV420H2     | SUV420H2     |             | 141.6682337 | 306.3569946 |
| 139.382517   |              | 163.7869348 |             |             |
| EMID1        | EMID1        | 1.041678189 | 0.880336191 | 0           |
| 4.903800443  |              |             |             |             |
| TRIM65       | TRIM65       | 1334.38976  | 1976.35475  | 1781.866098 |
| 2409.727538  |              |             |             |             |
| S100PBP      | S100PBP      | 1838.562003 | 2235.17359  | 1156.317361 |
| 1185.738947  |              |             |             |             |
| WNT5A        | WNT5A        | 0           | 0           | 1.115060136 |
| 0            |              |             |             | 0           |
| HIST1H2AH    | HIST1H2AH    |             | 260.4195472 | 349.493468  |
| 88.08975076  |              | 69.6339663  |             |             |
| B3GALT6      | B3GALT6      | 1787.519772 | 1245.675711 | 2113.038958 |
| 2335.189771  |              |             |             |             |
| ZSWIM1       | ZSWIM1       | 478.1302886 | 463.9371729 | 789.4625765 |
| 923.8760035  |              |             |             |             |
| C1orf174     | C1orf174     |             | 2644.820921 | 2181.473082 |
| 2945.98888   |              | 2409.727538 |             |             |

|             |             |             |             |             |
|-------------|-------------|-------------|-------------|-------------|
| HIST2H2AB   | HIST2H2AB   | 3.125034566 | 22.00840479 | 0           |
| 1.961520177 |             |             |             |             |
| SLC51A      | SLC51A      | 21.87524196 | 22.00840479 | 16.72590204 |
| 6.865320621 |             |             |             |             |
| STARD4      | STARD4      | 2162.52392  | 1817.013899 | 1846.539586 |
| 1978.193099 |             |             |             |             |
| SNX29       | SNX29       | 556.2561528 | 1729.860616 | 366.8547848 |
| 514.8990466 |             |             |             |             |
| PLXNA4      | PLXNA4      | 11.45846008 | 10.5640343  | 24.531323   |
| 24.51900222 |             |             |             |             |
| LTC4S       | LTC4S       | 1.041678189 | 1.760672383 | 2.230120273 |
| 8.826840798 |             |             |             |             |
| NFKBID      | NFKBID      | 1853.145498 | 2163.866359 | 1429.507095 |
| 2476.419224 |             |             |             |             |
| HOPX        | HOPX        | 1680.226918 | 5671.125745 | 913.2342516 |
| 2797.127773 |             |             |             |             |
| HFE         | HFE         | 59.37565676 | 59.86286102 | 149.4180583 |
| 76.49928692 |             |             |             |             |
| EFNA1       | EFNA1       | 9.375103698 | 8.803361914 | 62.44336763 |
| 88.26840798 |             |             |             |             |
| UBE2D3      | UBE2D3      | 47708.86104 | 39538.53937 | 44834.33796 |
| 45026.69567 |             |             |             |             |
| UBE2E1      | UBE2E1      | 211.4606723 | 593.346593  | 313.3318983 |
| 304.0356275 |             |             |             |             |
| C2orf44     | C2orf44     | 1678.143562 | 1545.870352 | 1757.334775 |
| 1430.928969 |             |             |             |             |
| APIP        | APIP        | 1605.226089 | 1463.999086 | 1148.51194  |
| 1523.120418 |             |             |             |             |
| ADAMTS13    | ADAMTS13    | 21.87524196 | 39.61512861 |             |
| 7.805420954 | 36.28812328 |             |             |             |
| GAS2L2      | GAS2L2      | 1.041678189 | 0           | 0           |
| RASSF2      | RASSF2      | 8305.300198 | 13373.18708 | 3510.209309 |
| 6446.536063 |             |             |             |             |
| FAM45A      | FAM45A      | 4021.919487 | 3439.4735   | 2071.781733 |
| 2018.404262 |             |             |             |             |
| NKD2        | NKD2        | 372.9207916 | 185.7509364 | 90.31987104 |
| 55.90332505 |             |             |             |             |
| NKD1        | NKD1        | 26.04195472 | 53.70050768 | 71.36384872 |
| 47.07648426 |             |             |             |             |
| RHOU        | RHOU        | 87.50096785 | 244.7334612 | 24.531323   |
| 29.42280266 |             |             |             |             |
| SLC30A1     | SLC30A1     | 1192.721526 | 703.388617  | 885.3577482 |
| 572.7638918 |             |             |             |             |
| TRPM4       | TRPM4       | 5.208390943 | 1.760672383 | 11.15060136 |
| 11.76912106 |             |             |             |             |
| MXD3        | MXD3        | 20648.14506 | 13516.68188 | 13263.64032 |
| 13403.06737 |             |             |             |             |
| HPR         | HPR         | 3.125034566 | 0.880336191 | 17.84096218 |
| 0.980760089 |             |             |             |             |
| MTMR3       | MTMR3       | 1677.101884 | 2942.963888 | 3002.856947 |

|              |              |             |             |             |             |
|--------------|--------------|-------------|-------------|-------------|-------------|
| 2963.856988  |              |             |             |             |             |
| CACTIN       | CACTIN       | 1438.557579 | 1640.066325 | 1267.823375 |             |
| 1330.89144   |              |             |             |             |             |
| POMP         | POMP         | 15963.71824 | 14675.20431 | 11541.98747 |             |
| 12353.65408  |              |             |             |             |             |
| LOC100129924 | LOC100129924 | 0           | 0.880336191 | 13.38072164 |             |
| 4.903800443  |              |             |             |             |             |
| ABCF2        | ABCF2        | 10394.90665 | 6687.03371  | 9188.095523 |             |
| 9177.95291   |              |             |             |             |             |
| RNA5-8S5     | RNA5-8S5     | 0           | 0.880336191 | 0           |             |
| 0.980760089  |              |             |             |             |             |
| PA2G4P4      | PA2G4P4      | 66.66740408 | 78.34992104 | 82.51445008 |             |
| 72.57624656  |              |             |             |             |             |
| NR2F1-AS1    | NR2F1-AS1    | 0           | 0           | 2.230120273 | 0           |
| FAM129A      | FAM129A      | 6411.529251 | 8828.011328 | 3588.263519 |             |
| 4087.80805   |              |             |             |             |             |
| GNG2         | GNG2         | 9235.518821 | 8096.451953 | 6647.988532 |             |
| 4927.338685  |              |             |             |             |             |
| PLB1         | PLB1         | 45.8338403  | 25.52974955 | 56.86806695 |             |
| 18.63444168  |              |             |             |             |             |
| B4GALT1      | B4GALT1      | 1069.8035   | 3984.401602 | 1065.99749  |             |
| 3055.067676  |              |             |             |             |             |
| LRRTM2       | LRRTM2       | 5.208390943 | 4.401680957 | 0           | 5.884560532 |
| NCOA2        | NCOA2        | 2625.029036 | 4097.084635 | 1956.930539 |             |
| 2669.628961  |              |             |             |             |             |
| TRPC3        | TRPC3        | 16.66685102 | 20.2477324  | 0           | 9.807600887 |
| NUP188       | NUP188       | 18282.49389 | 19083.04762 | 15340.99735 |             |
| 17865.52578  |              |             |             |             |             |
| CHMP3        | CHMP3        | 2326.067395 | 1622.459601 | 2890.235873 |             |
| 2265.555805  |              |             |             |             |             |
| RPLP2        | RPLP2        | 9205.310154 | 11894.22228 | 12313.60908 |             |
| 11044.33936  |              |             |             |             |             |
| LHB          | LHB          | 5.208390943 | 4.401680957 | 13.38072164 |             |
| 1.961520177  |              |             |             |             |             |
| NQ02         | NQ02         | 2528.152964 | 643.5257559 | 2000.417884 |             |
| 949.3757658  |              |             |             |             |             |
| FNDC7        | FNDC7        | 1.041678189 | 0           | 3.345180409 | 2.942280266 |
| LINC00161    | LINC00161    | 1.041678189 | 1.041678189 | 0           | 0           |
| CA5BP1       | CA5BP1       | 541.6726581 | 338.0490975 | 689.1071642 | 0           |
| 360.9197126  |              |             |             |             |             |
| LOC645166    | LOC645166    | 47.91719668 | 109.1616877 |             |             |
| 31.22168382  | 56.88408514  |             |             |             |             |
| PCED1B-AS1   | PCED1B-AS1   | 2395.859834 | 2394.514441 |             |             |
| 6181.893395  | 3938.732516  |             |             |             |             |
| IDI2-AS1     | IDI2-AS1     | 1131.262513 | 1025.591663 |             |             |
| 972.3324388  | 1284.795716  |             |             |             |             |
| NENF         | NENF         | 2379.192983 | 2115.447868 | 2095.197996 |             |
| 2210.63324   |              |             |             |             |             |
| PCGF5        | PCGF5        | 4450.049222 | 4482.671887 | 9956.371957 |             |
| 5848.272409  |              |             |             |             |             |

|             |           |             |             |             |   |
|-------------|-----------|-------------|-------------|-------------|---|
| GMPR2       | GMPR2     | 5049.014181 | 4032.820093 | 2930.378038 |   |
| 3555.255321 |           |             |             |             |   |
| FAM151B     | FAM151B   | 13.54181645 | 14.96571525 | 2.230120273 |   |
| 10.78836098 |           |             |             |             |   |
| ZNF251      | ZNF251    | 292.711571  | 300.1946413 | 682.4168034 |   |
| 834.6268355 |           |             |             |             |   |
| F13A1       | F13A1     | 0           | 0           | 0.980760089 |   |
| ATP6V1C1    | ATP6V1C1  |             | 5617.770472 | 4542.534748 |   |
| 5080.213981 |           | 4193.730139 |             |             |   |
| PLCB2       | PLCB2     | 1211.471733 | 2482.54806  | 588.7517519 |   |
| 1790.867922 |           |             |             |             |   |
| NOL6        | NOL6      | 3840.667482 | 3039.800869 | 4572.861619 |   |
| 4803.762914 |           |             |             |             |   |
| IRGQ        | IRGQ      | 894.8015641 | 1702.570194 | 1297.929999 |   |
| 1084.720658 |           |             |             |             |   |
| PLXDC2      | PLXDC2    | 0           | 0           | 0.980760089 |   |
| CAMK2N1     | CAMK2N1   | 3.125034566 | 23.76907717 | 8.92048109  |   |
| 25.49976231 |           |             |             |             |   |
| PCDHGB7     | PCDHGB7   | 7.291747321 | 4.401680957 | 33.45180409 |   |
| 10.78836098 |           |             |             |             |   |
| CXCR2       | CXCR2     | 33.33370204 | 20.2477324  | 34.56686422 |   |
| 6.865320621 |           |             |             |             |   |
| WWTR1       | WWTR1     | 37.50041479 | 93.31563629 | 15.61084191 |   |
| 86.3068878  |           |             |             |             |   |
| SAP25       | SAP25     | 10.41678189 | 90.67462772 | 28.99156354 |   |
| 37.26888337 |           |             |             |             |   |
| CYB561A3    | CYB561A3  |             | 5661.520956 | 4726.525012 |   |
| 4006.41107  |           | 4522.284769 |             |             |   |
| ARMC6       | ARMC6     | 3960.460473 | 2859.33195  | 2636.002162 |   |
| 3312.026819 |           |             |             |             |   |
| TMEM31      | TMEM31    | 7.291747321 | 0.880336191 | 23.41626286 |   |
| 4.903800443 |           |             |             |             |   |
| PPIL3       | PPIL3     | 2817.7395   | 1441.110345 | 2360.582308 |   |
| 1697.695713 |           |             |             |             |   |
| STX1B       | STX1B     | 5.208390943 | 8.803361914 | 15.61084191 | 0 |
| C9orf171    | C9orf171  |             | 1.041678189 | 0           | 0 |
| 183.9849225 |           | 379.5541543 |             |             |   |
| LOC642846   | LOC642846 |             | 345.8371586 | 509.7146548 |   |
| 183.9849225 |           |             |             |             |   |
| ZNF37A      | ZNF37A    | 2401.068225 | 2204.361823 | 3251.515357 |   |
| 3123.720882 |           |             |             |             |   |
| CSE1L       | CSE1L     | 20847.10559 | 14875.04063 | 15242.87206 |   |
| 16020.71605 |           |             |             |             |   |
| DLAT        | DLAT      | 7045.911268 | 5231.837986 | 5254.163362 |   |
| 5635.447469 |           |             |             |             |   |
| COL9A3      | COL9A3    | 32.29202385 | 5.282017149 | 4.460240545 |   |
| 10.78836098 |           |             |             |             |   |
| WISP2       | WISP2     | 0           | 1.115060136 | 0           |   |
| NEK3        | NEK3      | 511.4639907 | 628.5600407 | 265.3843124 |   |
| 386.4194749 |           |             |             |             |   |
| ANAPC16     | ANAPC16   | 5496.935802 | 5843.671639 | 7131.924632 |   |

|                 |               |             |               |  |
|-----------------|---------------|-------------|---------------|--|
| 6658.380242     |               |             |               |  |
| QRSL1 QRSL1     | 3469.830047   | 2354.899312 | 2959.369602   |  |
| 2520.553428     |               |             |               |  |
| APITD1 APITD1   | 1306.264449   | 1390.050846 | 935.5354543   |  |
| 923.8760035     |               |             |               |  |
| TBC1D17 TBC1D17 | 567.7146128   | 758.849797  | 1050.386648   |  |
| 799.3194723     |               |             |               |  |
| GIPR GIPR       | 22.91692015   | 36.97412004 | 22.30120273   |  |
| 39.23040355     |               |             |               |  |
| HLA-DRB1        | HLA-DRB1      | 8085.506101 | 14838.06651   |  |
| 2251.306415     | 3847.521828   |             |               |  |
| GBP1 GBP1       | 16981.43783   | 9237.367657 | 47696.69733   |  |
| 17178.99371     |               |             |               |  |
| ZNF189 ZNF189   | 120.8346699   | 352.1344766 | 139.382517    |  |
| 138.2871725     |               |             |               |  |
| ZNF654 ZNF654   | 1335.431438   | 1279.128486 | 2129.76486    |  |
| 1548.62018      |               |             |               |  |
| FBXW7 FBXW7     | 1748.977679   | 1986.918784 | 1925.708855   |  |
| 1523.120418     |               |             |               |  |
| SCNN1D SCNN1D   | 8.33342551    | 8.803361914 | 0 29.42280266 |  |
| TOPORS TOPORS   | 2795.864258   | 2667.41866  | 4296.326705   |  |
| 3407.160548     |               |             |               |  |
| SLC9A5 SLC9A5   | 84.37593328   | 122.3667306 | 81.39938995   |  |
| 152.9985738     |               |             |               |  |
| NEK2 NEK2       | 3565.66444    | 4083.879592 | 1598.996235   |  |
| 2646.090719     |               |             |               |  |
| YY1 YY1         | 1556.267214   | 1964.030043 | 1816.432962   |  |
| 1472.120893     |               |             |               |  |
| PDE6C PDE6C     | 0 1.760672383 | 1.115060136 | 0.980760089   |  |
| TBRG1 TBRG1     | 3303.161536   | 2430.608225 | 3438.84546    |  |
| 2856.954138     |               |             |               |  |
| ATAD1 ATAD1     | 6087.567335   | 4279.314227 | 5426.997683   |  |
| 4602.707096     |               |             |               |  |
| MAP4K1 MAP4K1   | 13403.27325   | 13794.86812 | 6281.133748   |  |
| 9039.665737     |               |             |               |  |
| TOM1 TOM1       | 2072.939596   | 1599.57086  | 2466.513021   |  |
| 2047.827065     |               |             |               |  |
| LINC01481       | LINC01481     | 242.711018  | 254.4171593   |  |
| 218.5517867     | 248.1323024   |             |               |  |
| CD72 CD72       | 252.0861217   | 448.0911214 | 158.3385393   |  |
| 463.8995219     |               |             |               |  |
| MADD MADD       | 4378.173427   | 5272.333451 | 4829.32545    |  |
| 5117.606143     |               |             |               |  |
| PLEKHG4 PLEKHG4 | 396.8793899   | 500.9112929 | 444.9089944   |  |
| 441.3420399     |               |             |               |  |
| CFAP46 CFAP46   | 2.083356377   | 1.760672383 | 0 2.942280266 |  |
| IL6ST IL6ST     | 2001.0638     | 3654.275531 | 8938.322052   |  |
| 5673.697113     |               |             |               |  |
| NDOR1 NDOR1     | 1415.640658   | 2536.248568 | 1267.823375   |  |
| 1755.560559     |               |             |               |  |

|              |              |             |             |             |             |
|--------------|--------------|-------------|-------------|-------------|-------------|
| GALNT16      | GALNT16      | 5.208390943 | 0           | 1.115060136 | 4.903800443 |
| ALDH16A1     | ALDH16A1     | 2183.357484 |             | 2590.829411 |             |
| 1528.747447  | 1996.827541  |             |             |             |             |
| ADAM32       | ADAM32       | 0           | 0           | 4.460240545 | 0           |
| FGF14-AS2    | FGF14-AS2    | 32.29202385 |             | 61.6235334  |             |
| 99.24035213  | 60.8071255   |             |             |             |             |
| FBX046       | FBX046       | 786.4670325 | 1468.400767 | 789.4625765 |             |
| 975.8562882  |              |             |             |             |             |
| E2F3         | E2F3         | 2208.35776  | 2606.675463 | 1702.696828 |             |
| 1498.601415  |              |             |             |             |             |
| UFM1         | UFM1         | 5061.514319 | 4318.049019 | 7557.877604 |             |
| 6107.193072  |              |             |             |             |             |
| LOC100128288 | LOC100128288 | 1.041678189 |             | 21.12806859 |             |
| 6.690360818  | 9.807600887  |             |             |             |             |
| SAMD15       | SAMD15       | 14.58349464 | 3.521344766 | 0           | 9.807600887 |
| UMOD         | UMOD         | 0           | 0           | 1.115060136 | 0           |
| SNORD29      | SNORD29      | 26.04195472 | 30.8117667  | 49.062646   |             |
| 37.26888337  |              |             |             |             |             |
| ABCD4        | ABCD4        | 1528.141903 | 1308.17958  | 1446.232997 |             |
| 1792.829442  |              |             |             |             |             |
| GPR98        | GPR98        | 1.041678189 | 0           | 2.230120273 | 0.980760089 |
| AP3B2        | AP3B2        | 0           | 0           | 3.345180409 | 6.865320621 |
| AFAP1L2      | AFAP1L2      | 248.9610871 | 234.1694269 | 231.9325083 |             |
| 281.4781454  |              |             |             |             |             |
| ZNF740       | ZNF740       | 219.7940978 | 345.9721232 | 322.2523794 |             |
| 332.4776701  |              |             |             |             |             |
| SNHG20       | SNHG20       | 513.547347  | 320.4423737 | 423.7228518 |             |
| 446.2458403  |              |             |             |             |             |
| PDCL3P4      | PDCL3P4      | 10.41678189 | 11.44437049 | 2.230120273 |             |
| 6.865320621  |              |             |             |             |             |
| SPECC1       | SPECC1       | 366.6707224 | 776.4565208 | 349.0138227 |             |
| 570.8023716  |              |             |             |             |             |
| GK3P         | GK3P         | 4.166712755 | 4.401680957 | 3.345180409 | 0           |
| PIP5K1A      | PIP5K1A      | 2260.441669 | 5708.980201 | 4190.395992 |             |
| 4179.018738  |              |             |             |             |             |
| C11orf68     | C11orf68     | 1357.30668  |             | 1434.947992 |             |
| 1980.346802  | 1598.638945  |             |             |             |             |
| VCAN         | VCAN         | 0           | 1.760672383 | 0           | 0           |
| UBE2C        | UBE2C        | 13326.18907 | 13054.50538 | 9247.19371  |             |
| 10585.34364  |              |             |             |             |             |
| CLMN         | CLMN         | 10.41678189 | 27.29042193 | 31.22168382 |             |
| 29.42280266  |              |             |             |             |             |
| TRIM58       | TRIM58       | 54.16726581 | 169.0245488 | 21.18614259 |             |
| 18.63444168  |              |             |             |             |             |
| TOM1L2       | TOM1L2       | 466.6718285 | 628.5600407 | 671.266202  |             |
| 567.8600913  |              |             |             |             |             |
| KLLN         | KLLN         | 32.29202385 | 44.89714576 | 24.531323   |             |
| 11.76912106  |              |             |             |             |             |
| SEC61A2      | SEC61A2      | 3778.16679  | 2914.79313  | 2660.533485 |             |
| 2733.378367  |              |             |             |             |             |

|             |             |             |             |             |
|-------------|-------------|-------------|-------------|-------------|
| C1orf27     | C1orf27     | 1338.556472 | 925.2333372 | 1256.672774 |
| 1053.336335 |             |             |             |             |
| KCNRG       | KCNRG       | 56.25062219 | 65.14487817 | 36.7969845  |
| 52.96104479 |             |             |             |             |
| SLC4A1AP    | SLC4A1AP    |             | 4544.841937 | 3030.117171 |
| 3786.744223 | 3293.392378 |             |             |             |
| ADSL        | ADSL        | 11279.29143 | 8592.081228 | 7437.451109 |
| 8364.902796 |             |             |             |             |
| NDUFS4      | NDUFS4      | 2285.441946 | 2596.991765 | 1868.840788 |
| 1975.250819 |             |             |             |             |
| VPS4B       | VPS4B       | 6213.610396 | 5123.556634 | 6517.526496 |
| 5426.545571 |             |             |             |             |
| CLCN6       | CLCN6       | 218.7524196 | 385.5872518 | 709.1782467 |
| 477.6301632 |             |             |             |             |
| MRE11A      | MRE11A      | 3023.991782 | 3006.348094 | 2133.110041 |
| 2730.436087 |             |             |             |             |
| POU4F3      | POU4F3      | 1.041678189 | 0           | 2.230120273 |
| 5-Sep       | 5-Sep       | 3.125034566 | 6.16235334  | 64.6734879  |
| 35.30736319 |             |             |             |             |
| PNN         | PNN         | 4511.508235 | 4457.142137 | 4260.644781 |
| 4397.728238 |             |             |             |             |
| GPAA1       | GPAA1       | 6152.151382 | 6491.599076 | 4670.986911 |
| 6181.730839 |             |             |             |             |
| SEC62       | SEC62       | 3008.366609 | 2847.007243 | 3910.515898 |
| 3075.663638 |             |             |             |             |
| MALL        | MALL        | 0           | 0           | 3.345180409 |
| NEK7        | NEK7        | 9716.774144 | 7302.388708 | 4.903800443 |
| 8335.479994 |             |             |             | 10031.08099 |
| CLDN14      | CLDN14      | 4.166712755 | 0           | 0           |
| PSEN1       | PSEN1       | 5831.3145   | 5001.189904 | 8.826840798 |
| 4475.208285 |             |             |             | 4687.712813 |
| GOLGA7      | GOLGA7      | 6055.275311 | 6076.080393 | 5917.624143 |
| 5663.889512 |             |             |             |             |
| SCFD1       | SCFD1       | 5840.689604 | 3876.120251 | 4113.456843 |
| 4183.922538 |             |             |             |             |
| STIP1       | STIP1       | 39573.35439 | 26418.00877 | 29386.29483 |
| 29896.50978 |             |             |             |             |
| P2RY14      | P2RY14      | 59.37565676 | 117.9650497 | 65.78854804 |
| 64.73016585 |             |             |             |             |
| TM6SF2      | TM6SF2      | 1.041678189 | 0           | 0           |
| TMEM14E     | TMEM14E     | 5.208390943 | 10.5640343  | 0           |
| KIAA2022    | KIAA2022    |             | 0           | 0           |
| 12.74988115 |             |             |             | 28.99156354 |
| RTKN        | RTKN        | 102.0844625 | 104.7600068 | 76.9391494  |
| 44.13420399 |             |             |             |             |
| CT55        | CT55        | 0           | 2.641008574 | 0           |
| GRN         | GRN         | 4288.589103 | 4113.811023 | 3820.196027 |
| 3957.366958 |             |             |             |             |
| COX8A       | COX8A       | 9504.271794 | 10980.43332 | 5889.74764  |
| 6240.576444 |             |             |             |             |



|             |           |             |             |             |
|-------------|-----------|-------------|-------------|-------------|
| C3orf80     | C3orf80   | 14.58349464 | 35.21344766 | 7.805420954 |
| 8.826840798 |           |             |             |             |
| VTN         | VTN       | 0           | 0.880336191 | 12.2656615  |
| NEB         | NEB       | 22.91692015 | 31.69210289 | 43.48734531 |
| 36.28812328 |           |             |             |             |
| MTRNR2L2    | MTRNR2L2  |             | 2.083356377 | 9.683698106 |
| 4.460240545 |           | 2.942280266 |             |             |
| FLJ22184    | FLJ22184  |             | 0           | 6.16235334  |
|             |           | 5.884560532 |             | 5.575300681 |
| AZIN1       | AZIN1     | 10303.23896 | 10082.4904  | 7431.875808 |
| 8120.693534 |           |             |             |             |
| NIN         | NIN       | 3557.331014 | 5333.956984 | 5065.718199 |
| 4297.690709 |           |             |             |             |
| ZNF85       | ZNF85     | 627.0902696 | 691.9442465 | 485.0511593 |
| 640.4363379 |           |             |             |             |
| C21orf140   | C21orf140 |             | 1.041678189 | 2.641008574 |
| 1.115060136 |           | 2.942280266 |             |             |
| C17orf107   | C17orf107 |             | 2.083356377 | 9.683698106 |
| 74.70902913 |           | 56.88408514 |             |             |
| SCRN1       | SCRN1     | 77.08418596 | 217.4430393 | 332.2879206 |
| 465.8610421 |           |             |             |             |
| TCP11L1     | TCP11L1   | 900.009955  | 848.6440885 | 653.4252399 |
| 666.9168603 |           |             |             |             |
| OTUD5       | OTUD5     | 6477.154977 | 5400.862534 | 5316.60673  |
| 6449.478343 |           |             |             |             |
| SCARNA5     | SCARNA5   | 5.208390943 | 12.32470668 | 17.84096218 |
| 1.961520177 |           |             |             |             |
| LINC00470   | LINC00470 |             | 7.291747321 | 0           |
| 10.78836098 |           |             |             | 0           |
| ZNF304      | ZNF304    | 527.0891635 | 791.4222361 | 1398.285411 |
| 738.5123468 |           |             |             |             |
| NUMBL       | NUMBL     | 171.8769011 | 238.5711079 | 288.8005753 |
| 247.1515423 |           |             |             |             |
| PPP1R1B     | PPP1R1B   | 0           | 0.880336191 | 0           |
| PNKD        | PNKD      | 1708.352229 | 2002.764836 | 1362.603487 |
| 1266.161274 |           |             |             |             |
| MCCC2       | MCCC2     | 8303.216842 | 7825.308406 | 5467.139848 |
| 6894.743423 |           |             |             |             |
| TECPR2      | TECPR2    | 343.7538023 | 744.764418  | 311.101778  |
| 429.5729188 |           |             |             |             |
| EFR3B       | EFR3B     | 7.291747321 | 44.01680957 | 4.460240545 |
| 77.480047   |           |             |             |             |
| ARHGAP26    | ARHGAP26  |             | 764.5917905 | 1093.37755  |
| 1145.16676  |           | 1230.853911 |             |             |
| RIPPLY3     | RIPPLY3   | 5.208390943 | 4.401680957 | 0           |
| SH3BP1      | SH3BP1    | 863.5512184 | 2626.923195 | 0           |
| 905.2415618 |           |             |             | 564.220429  |
| PKN1        | PKN1      | 2994.824793 | 5960.756352 | 2927.032858 |
| 3316.93062  |           |             |             |             |
| ETAA1       | ETAA1     | 1007.302808 | 984.215862  | 979.0227996 |

|             |             |             |             |             |             |
|-------------|-------------|-------------|-------------|-------------|-------------|
| 918.9722031 |             |             |             |             |             |
| EGFLAM      | EGFLAM      | 2.083356377 | 0           | 4.460240545 | 2.942280266 |
| RAB11FIP1   | RAB11FIP1   | 6548.74818  | 12936.60143 | 12280.68987 |             |
| 6369.056016 |             |             |             |             |             |
| MFSD1       | MFSD1       | 3093.78422  | 2832.041528 | 2928.147918 |             |
| 3325.757461 |             |             |             |             |             |
| B3GNT2      | B3GNT2      | 4444.840831 | 3536.310481 | 4667.64173  |             |
| 4341.824913 |             |             |             |             |             |
| ODF2L       | ODF2L       | 808.3422744 | 978.0535087 | 1148.51194  |             |
| 1075.893817 |             |             |             |             |             |
| EPAS1       | EPAS1       | 269.7946509 | 1037.91637  | 256.4638313 |             |
| 1517.235857 |             |             |             |             |             |
| RPL17       | RPL17       | 13960.57108 | 13626.72391 | 14121.12157 |             |
| 12624.34386 |             |             |             |             |             |
| UNC5B-AS1   | UNC5B-AS1   |             | 1.041678189 | 0           | 0           |
| 2.942280266 |             |             |             |             |             |
| MIR4520-2   | MIR4520-2   |             | 0           | 3.521344766 | 1.115060136 |
| 0           |             |             |             |             |             |
| MIR4722     | MIR4722     | 14.58349464 | 6.16235334  | 6.690360818 |             |
| 13.73064124 |             |             |             |             |             |
| MIR4721     | MIR4721     | 4918.804407 | 2525.684533 | 3719.840615 |             |
| 3633.716129 |             |             |             |             |             |
| MIR4720     | MIR4720     | 1.041678189 | 7.042689532 | 0           | 0.980760089 |
| MIR4717     | MIR4717     | 0           | 1.760672383 | 0           | 0           |
| MIR4715     | MIR4715     | 0           | 0           | 11.15060136 | 0.980760089 |
| MIR4714     | MIR4714     | 0           | 0           | 1.115060136 | 0           |
| MIR4712     | MIR4712     | 25.00027653 | 28.17075813 | 10.03554123 |             |
| 32.36508293 |             |             |             |             |             |
| MIR4709     | MIR4709     | 605.2150276 | 739.4824008 | 1257.787834 |             |
| 675.7437011 |             |             |             |             |             |
| MIR4707     | MIR4707     | 208.3356377 | 295.7929603 | 137.1523968 |             |
| 177.517576  |             |             |             |             |             |
| MIR3198-2   | MIR3198-2   |             | 622.9235568 | 1064.326455 |             |
| 403.6517693 | 602.1866944 |             |             |             |             |
| MIR4698     | MIR4698     | 0           | 0           | 1.115060136 | 0           |
| MIR4692     | MIR4692     | 0           | 0.880336191 | 0           | 0           |
| MIR4691     | MIR4691     | 44.79216211 | 36.97412004 | 79.16926967 |             |
| 50.99952461 |             |             |             |             |             |
| MIR4690     | MIR4690     | 3.125034566 | 1.760672383 | 0           | 0.980760089 |
| LOC284023   | LOC284023   |             | 161.4601192 | 174.3065659 |             |
| 396.9614085 | 354.054392  |             |             |             |             |
| LINC00238   | LINC00238   |             | 3.125034566 | 1.760672383 | 0           |
| 0.980760089 |             |             |             |             |             |
| PWWP2B      | PWWP2B      | 11.45846008 | 7.923025723 | 73.59396899 |             |
| 101.9990492 |             |             |             |             |             |
| MY01H       | MY01H       | 5.208390943 | 21.12806859 | 0           | 14.71140133 |
| TFAP2E      | TFAP2E      | 34.37538023 | 28.17075813 | 49.062646   |             |
| 44.13420399 |             |             |             |             |             |
| CDH20       | CDH20       | 2.083356377 | 3.521344766 | 0           | 13.73064124 |
| MRVI1       | MRVI1       | 1.041678189 | 2.641008574 | 0           | 2.942280266 |

|             |            |             |             |             |
|-------------|------------|-------------|-------------|-------------|
| PPP4R1-AS1  | PPP4R1-AS1 | 2.083356377 | 2.641008574 | 0           |
| 1.961520177 |            |             |             |             |
| BET1L       | BET1L      | 2912.532216 | 2622.521514 | 6622.342149 |
| 4884.185242 |            |             |             |             |
| TCL1A       | TCL1A      | 0           | 2.641008574 | 0           |
| GNG4        | GNG4       | 1330.223047 | 2006.28618  | 369.0849051 |
| 1143.566263 |            |             |             |             |
| SCN8A       | SCN8A      | 11.45846008 | 15.84605145 | 0           |
| TARSL2      | TARSL2     | 819.8007345 | 898.8232515 | 1156.317361 |
| 784.6080709 |            |             |             |             |
| HMOX2       | HMOX2      | 9477.188161 | 6512.727144 | 6147.326531 |
| 6799.609695 |            |             |             |             |
| SLC6A12     | SLC6A12    | 0           | 0           | 12.2656615  |
| PHOSPHO2    | PHOSPHO2   |             |             | 147.9183028 |
| 216.3216664 |            |             |             | 248.1323024 |
| B3GNT1      | B3GNT1     | 622.9235568 | 636.4830664 | 506.2373019 |
| 744.3969073 |            |             |             |             |
| AADAT       | AADAT      | 0           | 1.760672383 | 0           |
| GAPDH       | GAPDH      | 369081.1658 | 279134.3586 | 219514.0836 |
| 303944.4168 |            |             |             |             |
| P2RX4       | P2RX4      | 2430.235214 | 1639.185988 | 1598.996235 |
| 1652.580749 |            |             |             |             |
| ARMC4       | ARMC4      | 3.125034566 | 0           | 1.115060136 |
| MIOX        | MIOX       | 5.208390943 | 7.042689532 | 0           |
| CWF19L1     | CWF19L1    | 4359.42322  | 3620.822755 | 2958.254542 |
| 3426.77575  |            |             |             |             |
| HLA-DQA2    | HLA-DQA2   | 0           | 1.760672383 | 2.230120273 |
| 0           |            |             |             |             |
| SENP2       | SENP2      | 2416.693398 | 1681.442126 | 2578.019035 |
| 2217.49856  |            |             |             |             |
| SREBF1      | SREBF1     | 1835.436968 | 5047.847722 | 3257.090658 |
| 4307.498309 |            |             |             |             |
| ZNF211      | ZNF211     | 808.3422744 | 783.4992104 | 1617.952258 |
| 1050.394055 |            |             |             |             |
| VKORC1      | VKORC1     | 2764.613913 | 2316.16452  | 2353.891948 |
| 2532.322549 |            |             |             |             |
| DSC2        | DSC2       | 0           | 0           | 0.980760089 |
| TBC1D1      | TBC1D1     | 986.4692447 | 2596.991765 | 2179.942566 |
| 1721.233956 |            |             |             |             |
| CUEDC1      | CUEDC1     | 9.375103698 | 8.803361914 | 13.38072164 |
| WDR44       | WDR44      | 2454.193813 | 1761.552719 | 2198.898589 |
| 1490.755335 |            |             |             |             |
| FAM86B2     | FAM86B2    | 0           | 0           | 2.230120273 |
| C18orf32    | C18orf32   |             |             | 2523.986251 |
| 3559.271955 |            |             |             | 2163.556756 |
| PAGE5       | PAGE5      | 2.083356377 | 3.521344766 | 2.230120273 |
| 12.74988115 |            |             |             |             |
| ZNF780B     | ZNF780B    | 191.6687867 | 295.7929603 | 391.3861078 |
| 348.1698315 |            |             |             |             |
| MEAF6       | MEAF6      | 4674.010033 | 3962.393198 | 6426.091565 |

|                 |              |               |               |  |
|-----------------|--------------|---------------|---------------|--|
| 5882.599012     |              |               |               |  |
| MYH7B MYH7B     | 231.2525579  | 232.4087545   | 201.8258847   |  |
| 256.9591432     |              |               |               |  |
| VSTM2L VSTM2L   | 0 10.5640343 | 0             | 0.980760089   |  |
| CAPN10 CAPN10   | 1059.386718  | 1302.897563   | 722.5589683   |  |
| 1070.009257     |              |               |               |  |
| ADD3 ADD3       | 14899.12313  | 16324.95433   | 9732.244869   |  |
| 9046.531058     |              |               |               |  |
| 6-Mar 6-Mar     | 3142.743095  | 4342.698432   | 3997.490589   |  |
| 3719.042256     |              |               |               |  |
| IFNAR2 IFNAR2   | 4627.134514  | 4779.345183   | 3551.466534   |  |
| 3800.445344     |              |               |               |  |
| SSFA2 SSFA2     | 850.009402   | 1437.589001   | 627.7788567   |  |
| 633.5710173     |              |               |               |  |
| DHRS4-AS1       | DHRS4-AS1    | 1191.679848   | 638.2437388   |  |
| 1404.975772     | 1167.104506  |               |               |  |
| MESTIT1 MESTIT1 | 1.041678189  | 0 0           | 0             |  |
| ZNF33A ZNF33A   | 1414.59898   | 1462.238414   | 2682.834688   |  |
| 1878.15557      |              |               |               |  |
| GPR180 GPR180   | 2472.94402   | 2576.744032   | 1806.397421   |  |
| 2334.209011     |              |               |               |  |
| FKBP4 FKBP4     | 9162.601348  | 8268.11751    | 11708.13143   |  |
| 11897.60064     |              |               |               |  |
| ZNF554 ZNF554   | 151.0433374  | 90.67462772   | 596.5571729   |  |
| 324.6315893     |              |               |               |  |
| RPL28 RPL28     | 2884.406905  | 4292.519269   | 4108.996602   |  |
| 3568.985963     |              |               |               |  |
| SEZ6L2 SEZ6L2   | 2.083356377  | 7.923025723   | 0 10.78836098 |  |
| ALG1L2 ALG1L2   | 7.291747321  | 16.72638764   | 8.92048109    |  |
| 28.44204257     |              |               |               |  |
| GPD2 GPD2       | 1307.306127  | 2058.226016   | 1925.708855   |  |
| 2224.363881     |              |               |               |  |
| JAG2 JAG2       | 16.66685102  | 24.64941336   | 60.21324736   |  |
| 24.51900222     |              |               |               |  |
| CAPN9 CAPN9     | 0 0          | 0 0.980760089 |               |  |
| WDR72 WDR72     | 0 0          | 1.115060136   | 0.980760089   |  |
| RUFY2 RUFY2     | 3354.203768  | 2802.110097   | 3647.361706   |  |
| 3022.702593     |              |               |               |  |
| TMEM184A        | TMEM184A     | 37.50041479   | 99.47798963   |  |
| 36.7969845      | 55.90332505  |               |               |  |
| TXNIP TXNIP     | 11585.54481  | 5613.903893   | 31298.62296   |  |
| 18676.61437     |              |               |               |  |
| BFSP2 BFSP2     | 81.25089872  | 41.375801     | 18.95602232   |  |
| 24.51900222     |              |               |               |  |
| CKMT2 CKMT2     | 23.95859834  | 28.17075813   | 6.690360818   |  |
| 6.865320621     |              |               |               |  |
| AP3B1 AP3B1     | 5372.976097  | 5414.947914   | 3937.277341   |  |
| 5387.315167     |              |               |               |  |
| ZNF80 ZNF80     | 53.12558762  | 57.22185244   | 52.4078264    |  |
| 114.7489304     |              |               |               |  |

|          |          |             |             |             |             |
|----------|----------|-------------|-------------|-------------|-------------|
| FBLN1    | FBLN1    | 1.041678189 | 2.641008574 | 0           | 4.903800443 |
| ANKRD6   | ANKRD6   | 89.58432423 | 116.2043773 | 228.5873279 |             |
|          |          | 315.8047486 |             |             |             |
| PCDHB4   | PCDHB4   | 0           | 0           | 0           | 0.980760089 |
| EXOSC4   | EXOSC4   | 2553.153241 | 1767.715072 | 1981.461862 |             |
|          |          | 2151.787635 |             |             |             |
| PCDHB2   | PCDHB2   | 0           | 0           | 6.690360818 | 0           |
| PCDHB15  | PCDHB15  | 0           | 2.641008574 | 1.115060136 | 0           |
| HIST1H3G | HIST1H3G |             | 66.66740408 | 160.2211868 |             |
|          |          | 24.531323   |             |             |             |
| IVL      | IVL      | 4.166712755 | 0           | 1.115060136 | 0           |
| ITK      | ITK      | 13759.52719 | 11795.62463 | 22476.26717 |             |
|          |          | 20450.80937 |             |             |             |
| CDC48    | CDC48    | 9420.937539 | 8066.520522 | 4965.362787 |             |
|          |          | 6116.019913 |             |             |             |
| RBFA     | RBFA     | 896.8849205 | 698.1065998 | 1005.784243 |             |
|          |          | 926.8182838 |             |             |             |
| ADHFE1   | ADHFE1   | 59.37565676 | 80.99092961 | 103.7005927 |             |
|          |          | 145.1524931 |             |             |             |
| BLNK     | BLNK     | 1.041678189 | 7.042689532 | 0           | 23.53824213 |
| FAM173B  | FAM173B  | 866.676253  | 785.2598828 | 434.8734531 |             |
|          |          | 920.9337233 |             |             |             |
| THTPA    | THTPA    | 655.2155807 | 562.5348263 | 1020.280025 |             |
|          |          | 811.0885933 |             |             |             |
| LILRA6   | LILRA6   | 13.54181645 | 3.521344766 | 4.460240545 |             |
|          |          | 21.57672195 |             |             |             |
| LENG1    | LENG1    | 514.5890252 | 377.6642261 | 526.3083843 |             |
|          |          | 432.5151991 |             |             |             |
| GNPTAB   | GNPTAB   | 13980.36297 | 6820.844811 | 6506.375895 |             |
|          |          | 4130.961493 |             |             |             |
| KDM4E    | KDM4E    | 0           | 2.641008574 | 0           | 0           |
| NXNL2    | NXNL2    | 0           | 0.880336191 | 0           | 0           |
| NLGN3    | NLGN3    | 16.66685102 | 24.64941336 | 4.460240545 |             |
|          |          | 20.59596186 |             |             |             |
| ALDH3A2  | ALDH3A2  | 3605.248211 | 2517.761508 | 1673.705265 |             |
|          |          | 1921.309014 |             |             |             |
| PTEN     | PTEN     | 4637.551296 | 5501.22086  | 3476.757505 |             |
|          |          | 2887.357701 |             |             |             |
| PROS1    | PROS1    | 104.1678189 | 111.8026963 | 17.84096218 |             |
|          |          | 131.4218519 |             |             |             |
| CGB      | CGB      | 1.041678189 | 0           | 1.115060136 | 0           |
| PLAGL2   | PLAGL2   | 4418.798876 | 4752.935098 | 5334.447692 |             |
|          |          | 6357.286895 |             |             |             |
| CACNG1   | CACNG1   | 0           | 0           | 0           | 0.980760089 |
| NCAM1    | NCAM1    | 7.291747321 | 3.521344766 | 8.92048109  |             |
|          |          | 10.78836098 |             |             |             |
| IL31RA   | IL31RA   | 0           | 11.44437049 | 0           | 2.942280266 |
| HEPACAM  | HEPACAM  | 0           | 0           | 2.942280266 |             |
| PLCB1    | PLCB1    | 12.50013826 | 44.01680957 | 41.25722504 |             |
|          |          | 140.2486927 |             |             |             |

|                 |             |               |             |
|-----------------|-------------|---------------|-------------|
| PCDHGB1 PCDHGB1 | 4.166712755 | 12.32470668   | 39.02710477 |
| 13.73064124     |             |               |             |
| PCDHGA9 PCDHGA9 | 4.166712755 | 4.401680957   | 33.45180409 |
| 10.78836098     |             |               |             |
| ERP44 ERP44     | 7690.710067 | 5699.296503   | 6385.9494   |
| 5236.278113     |             |               |             |
| MOSPD1 MOSPD1   | 2204.191047 | 1330.187985   | 1671.475144 |
| 1208.296429     |             |               |             |
| COMMD10 COMMD10 | 1935.438075 | 1787.082469   | 1304.620359 |
| 1587.850584     |             |               |             |
| COQ7 COQ7       | 931.2603007 | 787.9008913   | 828.4896812 |
| 725.7624656     |             |               |             |
| ZWILCH ZWILCH   | 6500.071897 | 5317.230596   | 4090.04058  |
| 4460.496883     |             |               |             |
| DHRS12 DHRS12   | 254.169478  | 271.143547    | 529.6535647 |
| 480.5724434     |             |               |             |
| TMLHE TMLHE     | 355.2122623 | 431.3647338   | 475.015618  |
| 458.0149614     |             |               |             |
| MICAL2 MICAL2   | 5903.190295 | 9632.638607   | 2834.482866 |
| 4404.593558     |             |               |             |
| PRSS35 PRSS35   | 0 0         | 14.49578177   | 8.826840798 |
| TBC1D21 TBC1D21 | 0 0         | 0 0.980760089 |             |
| RPRD2 RPRD2     | 2551.069884 | 3298.619709   | 3691.964111 |
| 2847.146537     |             |               |             |
| LRRC34 LRRC34   | 116.6679571 | 152.2981611   | 70.24878858 |
| 188.305937      |             |               |             |
| FBXW8 FBXW8     | 439.5881956 | 643.5257559   | 575.3710303 |
| 679.6667414     |             |               |             |
| PSTK PSTK       | 215.6273851 | 154.0588335   | 274.3047935 |
| 164.7676949     |             |               |             |
| GRPEL1 GRPEL1   | 7512.583097 | 4908.754603   | 6718.237321 |
| 6473.997345     |             |               |             |
| TRIB1 TRIB1     | 4186.50464  | 7060.296255   | 890.9330489 |
| 1889.924691     |             |               |             |
| MED28 MED28     | 2464.610594 | 2579.385041   | 3082.026217 |
| 2710.820885     |             |               |             |
| ITPKC ITPKC     | 680.2158572 | 589.8252483   | 903.1987104 |
| 946.4334856     |             |               |             |
| HSD3B7 HSD3B7   | 465.6301503 | 137.3324459   | 177.2945617 |
| 197.1327778     |             |               |             |
| MED29 MED29     | 4582.342352 | 3548.635188   | 4724.509797 |
| 4137.826814     |             |               |             |
| KIF16B KIF16B   | 257.2945126 | 271.143547    | 309.9867179 |
| 600.2251743     |             |               |             |
| GZMK GZMK       | 190.6271085 | 583.6628949   | 380.2355065 |
| 311.8817082     |             |               |             |
| RBMXL1 RBMXL1   | 1334.38976  | 1596.929851   | 1735.033572 |
| 1896.790011     |             |               |             |
| RPS10-NUDT3     | RPS10-NUDT3 | 15643.92304   | 13989.42242 |
| 16614.39603     | 13754.17948 |               |             |

|         |         |             |             |             |             |
|---------|---------|-------------|-------------|-------------|-------------|
| TAF7L   | TAF7L   | 6.250069132 | 4.401680957 | 0           | 4.903800443 |
| FAM49B  | FAM49B  | 15909.55098 | 11956.72615 | 9873.857507 |             |
|         |         | 11396.43223 |             |             |             |
| TAMM41  | TAMM41  | 1354.181645 | 1084.574188 | 1236.601691 |             |
|         |         | 1381.890965 |             |             |             |
| NOLC1   | NOLC1   | 18415.8287  | 12638.10636 | 21073.52152 |             |
|         |         | 21112.82243 |             |             |             |
| FASTKD5 | FASTKD5 | 5469.852169 | 4742.371063 | 4214.927315 |             |
|         |         | 4262.383345 |             |             |             |
| NIF3L1  | NIF3L1  | 2829.197961 | 2604.91479  | 2328.245565 |             |
|         |         | 2448.957941 |             |             |             |
| MRPS35  | MRPS35  | 6972.993795 | 5117.394281 | 5662.275372 |             |
|         |         | 5492.256497 |             |             |             |
| HAPLN2  | HAPLN2  | 0           | 0.880336191 | 0           |             |
| NUBPL   | NUBPL   | 694.7993519 | 657.611135  | 554.1848877 |             |
|         |         | 698.3011831 |             |             |             |
| HNRNPLL | HNRNPLL | 9617.814716 | 7983.76892  | 5991.218112 |             |
|         |         | 7805.869546 |             |             |             |
| REEP6   | REEP6   | 58.33397857 | 58.98252483 | 199.5957644 |             |
|         |         | 184.3828967 |             |             |             |
| PABPC3  | PABPC3  | 1.041678189 | 9.683698106 | 2.230120273 |             |
|         |         | 7.846080709 |             |             |             |
| TRIM66  | TRIM66  | 88.54264604 | 147.016144  | 100.3554123 |             |
|         |         | 120.6334909 |             |             |             |
| PSMD6   | PSMD6   | 12420.97072 | 8757.584432 | 10323.22674 |             |
|         |         | 9914.503736 |             |             |             |
| LRIG2   | LRIG2   | 737.5081576 | 687.5425655 | 1306.85048  |             |
|         |         | 843.4536763 |             |             |             |
| ECHDC1  | ECHDC1  | 6459.446448 | 4842.729389 | 5384.625398 |             |
|         |         | 5250.008755 |             |             |             |
| PPP1R26 | PPP1R26 | 45.8338403  | 97.71731725 | 64.6734879  |             |
|         |         | 47.07648426 |             |             |             |
| HEPH    | HEPH    | 15.62517283 | 7.042689532 | 15.61084191 |             |
|         |         | 1.961520177 |             |             |             |
| HES7    | HES7    | 1.041678189 | 2.641008574 | 0           | 0           |
| MYPN    | MYPN    | 2.083356377 | 0           | 0           | 6.865320621 |
| DPY30   | DPY30   | 3373.995653 | 3434.191483 | 2795.455762 |             |
|         |         | 3086.451999 |             |             |             |
| RAB11A  | RAB11A  | 10907.41231 | 8346.467431 | 10111.36532 |             |
|         |         | 8355.095195 |             |             |             |
| AMPH    | AMPH    | 25.00027653 | 18.48706002 | 7.805420954 |             |
|         |         | 10.78836098 |             |             |             |
| TRADD   | TRADD   | 4009.419348 | 3531.9088   | 2895.811174 |             |
|         |         | 2692.186443 |             |             |             |
| CTS0    | CTS0    | 668.7573971 | 743.8840818 | 1595.651055 |             |
|         |         | 1477.024694 |             |             |             |
| RBBP8   | RBBP8   | 5959.440918 | 4955.412422 | 3497.943647 |             |
|         |         | 3578.793564 |             |             |             |
| CCT7    | CCT7    | 35514.97617 | 25789.44873 | 28019.2311  |             |
|         |         | 30051.46988 |             |             |             |

|                 |               |               |               |
|-----------------|---------------|---------------|---------------|
| KIAA0907        | KIAA0907      | 561.4645437   | 1246.556047   |
| 732.5945095     | 749.3007077   |               |               |
| CASP2 CASP2     | 3472.955081   | 6045.268627   | 3029.61839    |
| 3428.73727      |               |               |               |
| WDR66 WDR66     | 1.041678189   | 0 2.230120273 | 22.55748204   |
| UHRF1BP1L       | UHRF1BP1L     | 6838.617309   | 5047.847722   |
| 4324.203208     | 4392.824437   |               |               |
| ZNF431 ZNF431   | 652.0905461   | 631.2010493   | 1295.699878   |
| 917.991443      |               |               |               |
| TMEM185B        | TMEM185B      | 1441.682613   | 1516.819258   |
| 2022.719087     | 1925.232054   |               |               |
| CCDC74B CCDC74B | 4.166712755   | 0.880336191   | 7.805420954   |
| 22.55748204     |               |               |               |
| C17orf49        | C17orf49      | 10554.28341   | 11225.16678   |
| 6857.619838     | 6789.802094   |               |               |
| BTG3 BTG3       | 3525.038991   | 3019.553137   | 2220.084731   |
| 2297.920888     |               |               |               |
| ZNF720 ZNF720   | 1008.344487   | 1084.574188   | 709.1782467   |
| 942.5104452     |               |               |               |
| C5orf24 C5orf24 | 1517.725121   | 1404.136225   | 1383.789629   |
| 1489.774575     |               |               |               |
| RBBP4 RBBP4     | 27482.59565   | 24769.13908   | 22348.03525   |
| 24491.54093     |               |               |               |
| NRCAM NRCAM     | 0 0.880336191 | 99.24035213   | 31.38432284   |
| KCNE3 KCNE3     | 2.083356377   | 74.82857627   | 0 22.55748204 |
| ELP5 ELP5       | 5122.973332   | 3863.795544   | 3926.12674    |
| 4648.80282      |               |               |               |
| MTRNR2L8        | MTRNR2L8      | 4.166712755   | 4.401680957   |
| 4.460240545     | 1.961520177   |               |               |
| CUL4B CUL4B     | 2347.942637   | 3561.840231   | 2803.261183   |
| 3220.816131     |               |               |               |
| VEGFB VEGFB     | 248.9610871   | 350.3738042   | 546.3794668   |
| 775.7812301     |               |               |               |
| TCEA1 TCEA1     | 8380.301028   | 7883.410594   | 7701.720361   |
| 7990.252442     |               |               |               |
| PPP1R12A        | PPP1R12A      | 9659.481844   | 8568.312151   |
| 8331.729338     | 7980.444841   |               |               |
| SNORD107        | SNORD107      | 12.50013826   | 4.401680957   |
| 43.48734531     | 22.55748204   |               |               |
| TNFRSF9 TNFRSF9 | 7025.077705   | 2866.374639   | 10237.36711   |
| 15992.27401     |               |               |               |
| RAE1 RAE1       | 6824.033814   | 5136.761677   | 5326.642271   |
| 5467.737494     |               |               |               |
| C5orf51 C5orf51 | 1654.184964   | 1925.295251   | 2194.438348   |
| 2313.613049     |               |               |               |
| SNX20 SNX20     | 3515.663887   | 4774.063166   | 3027.38827    |
| 4250.614224     |               |               |               |
| SHMT1 SHMT1     | 6812.575354   | 6118.33653    | 3142.239464   |
| 4607.610897     |               |               |               |
| CHRFAM7A        | CHRFAM7A      | 1.041678189   | 0.880336191 0 |



|             |             |             |             |             |             |
|-------------|-------------|-------------|-------------|-------------|-------------|
|             |             | 0.980760089 |             |             |             |
| SLC35E2     | SLC35E2     | 966.6773591 | 890.9002257 | 1205.380007 |             |
| 649.2631787 |             |             |             |             |             |
| TCP11       | TCP11       | 2.083356377 | 0           | 0           | 6.865320621 |
| MIR22HG     | MIR22HG     | 287.5031801 | 192.7936259 | 393.6162281 |             |
| 213.8056993 |             |             |             |             |             |
| MAEL        | MAEL        | 0           | 15.84605145 | 27.87650341 | 31.38432284 |
| GK5         | GK5         | 626.0485914 | 883.8575362 | 460.5198363 |             |
| 634.5517774 |             |             |             |             |             |
| BMS1P20     | BMS1P20     | 1698.977126 | 1206.060582 | 1120.635437 |             |
| 1315.199279 |             |             |             |             |             |
| LCK         | LCK         | 68999.72154 | 50838.53472 | 37660.04104 |             |
| 45573.9598  |             |             |             |             |             |
| FIGNL1      | FIGNL1      | 3879.209575 | 3955.350508 | 3069.760555 |             |
| 3206.10473  |             |             |             |             |             |
| C17orf89    | C17orf89    |             | 3158.368268 | 2493.112094 |             |
| 2541.222051 | 2242.017563 |             |             |             |             |
| OR7E37P     | OR7E37P     | 0           | 0           | 0.980760089 |             |
| FAM224A     | FAM224A     | 0           | 0.880336191 | 0           | 1.961520177 |
| PCBP1-AS1   | PCBP1-AS1   |             | 214.5857069 | 214.8020307 |             |
| 287.6855152 | 297.1703069 |             |             |             |             |
| DKKL1       | DKKL1       | 1.041678189 | 0           | 0           | 0           |
| CCDC94      | CCDC94      | 1723.977402 | 1242.154366 | 1495.295643 |             |
| 1426.025169 |             |             |             |             |             |
| MRPL20      | MRPL20      | 5154.223678 | 4176.314892 | 5055.682658 |             |
| 4152.538215 |             |             |             |             |             |
| MLH3        | MLH3        | 551.0477618 | 823.114339  | 772.7366744 |             |
| 908.1838421 |             |             |             |             |             |
| ISPD        | ISPD        | 61.45901313 | 71.30723151 | 42.37228518 |             |
| 54.92256497 |             |             |             |             |             |
| KBTBD13     | KBTBD13     | 0           | 0           | 0.980760089 |             |
| FAM111B     | FAM111B     | 3342.745308 | 5142.043694 | 1913.443194 |             |
| 2693.167203 |             |             |             |             |             |
| ZADH2       | ZADH2       | 986.4692447 | 985.0961982 | 1282.319157 |             |
| 1043.528734 |             |             |             |             |             |
| ZNF800      | ZNF800      | 1886.4792   | 2107.524842 | 3270.47138  |             |
| 2349.901172 |             |             |             |             |             |
| CKLF        | CKLF        | 4896.929165 | 7171.218615 | 2854.553949 |             |
| 4205.49926  |             |             |             |             |             |
| PLEKH02     | PLEKH02     | 4583.38403  | 3740.548477 | 2993.936466 |             |
| 3530.736319 |             |             |             |             |             |
| KCNJ18      | KCNJ18      | 4.166712755 | 1.760672383 | 0           | 0           |
| TMEM87A     | TMEM87A     | 6253.194167 | 3778.402934 | 6343.577115 |             |
| 4650.76434  |             |             |             |             |             |
| GTF2A1      | GTF2A1      | 515.6307034 | 1100.420239 | 954.4914766 |             |
| 593.3598536 |             |             |             |             |             |
| OTUD4       | OTUD4       | 2419.818432 | 2902.468423 | 3968.499025 |             |
| 3804.368384 |             |             |             |             |             |
| FAF2        | FAF2        | 7666.751469 | 6460.787309 | 6306.780131 |             |
| 6187.615399 |             |             |             |             |             |

|             |         |               |               |               |
|-------------|---------|---------------|---------------|---------------|
| PNISR       | PNISR   | 3119.826175   | 3470.285267   | 3811.275546   |
| 3783.772422 |         |               |               |               |
| GPR162      | GPR162  | 1.041678189   | 1.760672383   | 0 2.942280266 |
| C2CD2       | C2CD2   | 171.8769011   | 228.0070736   | 279.8800942   |
| 315.8047486 |         |               |               |               |
| RIC8A       | RIC8A   | 9266.769167   | 7361.371233   | 9164.67926    |
| 9244.644596 |         |               |               |               |
| ODF3        | ODF3    | 0 0           | 1.115060136   | 0             |
| EXD1        | EXD1    | 0 2.641008574 | 11.15060136   | 0.980760089   |
| SLC06A1     | SLC06A1 | 0 0           | 0 0.980760089 |               |
| EARS2       | EARS2   | 1985.438628   | 1612.775903   | 1925.708855   |
| 2324.40141  |         |               |               |               |
| ALG2        | ALG2    | 4026.086199   | 2847.887579   | 3615.024962   |
| 2754.955089 |         |               |               |               |
| ANKLE1      | ANKLE1  | 566.6729347   | 273.7845555   | 382.4656267   |
| 209.882659  |         |               |               |               |
| U2AF1       | U2AF1   | 6135.484531   | 8943.335369   | 6360.303017   |
| 6829.032497 |         |               |               |               |
| GGCX        | GGCX    | 3559.414371   | 3775.761925   | 3687.503871   |
| 4179.999498 |         |               |               |               |
| GPR183      | GPR183  | 6189.651797   | 4413.125328   | 10428.04239   |
| 12205.5593  |         |               |               |               |
| EPYC        | EPYC    | 0 0           | 6.690360818   | 0             |
| HUS1        | HUS1    | 2439.610318   | 1317.863279   | 2636.002162   |
| 1612.369586 |         |               |               |               |
| NPPB        | NPPB    | 0 0           | 0 0.980760089 |               |
| TXNRD1      | TXNRD1  | 18479.37107   | 13271.06809   | 16836.293     |
| 9482.969297 |         |               |               |               |
| VAMP1       | VAMP1   | 1662.518389   | 2214.045521   | 1330.266743   |
| 2177.287397 |         |               |               |               |
| HIRA        | HIRA    | 2496.902618   | 3237.876512   | 2456.47748    |
| 1787.925642 |         |               |               |               |
| ZCCHC2      | ZCCHC2  | 400.0044245   | 432.24507     | 1003.554123   |
| 437.4189995 |         |               |               |               |
| L3MBTL1     | L3MBTL1 | 70.83411683   | 119.725722    | 85.85963049   |
| 117.6912106 |         |               |               |               |
| KBTBD2      | KBTBD2  | 3483.371863   | 3255.483236   | 3504.634008   |
| 3064.875277 |         |               |               |               |
| UBIAD1      | UBIAD1  | 3520.872278   | 2472.864362   | 3828.001448   |
| 2834.396656 |         |               |               |               |
| PRRC2B      | PRRC2B  | 1423.974084   | 5506.502877   | 1958.045599   |
| 2578.418273 |         |               |               |               |
| MIER2       | MIER2   | 253.1277999   | 646.1667645   | 375.7752659   |
| 385.4387148 |         |               |               |               |
| ANKDD1A     | ANKDD1A | 455.2133685   | 708.6706341   | 338.9782814   |
| 558.0524905 |         |               |               |               |
| EIF4G1      | EIF4G1  | 13590.77533   | 18306.5911    | 14464.56009   |
| 14619.20988 |         |               |               |               |
| ZNF641      | ZNF641  | 784.3836761   | 689.3032379   | 690.2222243   |
| 841.4921561 |         |               |               |               |

|             |             |             |             |             |   |
|-------------|-------------|-------------|-------------|-------------|---|
| ZNF764      | ZNF764      | 521.8807725 | 452.4928024 | 613.2830749 |   |
| 653.1862191 |             |             |             |             |   |
| BAAT        | BAAT        | 7.291747321 | 0.880336191 | 14.49578177 | 0 |
| TPRN        | TPRN        | 26.04195472 | 65.14487817 | 36.7969845  |   |
| 24.51900222 |             |             |             |             |   |
| TMTC4       | TMTC4       | 1155.221111 | 941.0793886 | 1134.016159 |   |
| 1012.144412 |             |             |             |             |   |
| C4orf48     | C4orf48     | 457.2967248 | 838.9603904 | 291.0306956 |   |
| 422.7075982 |             |             |             |             |   |
| TNRC6C      | TNRC6C      | 389.5876426 | 766.7728227 | 1173.043263 |   |
| 765.9736292 |             |             |             |             |   |
| SUGCT       | SUGCT       | 7.291747321 | 10.5640343  | 14.49578177 |   |
| 41.19192372 |             |             |             |             |   |
| CBR4        | CBR4        | 1000.011061 | 1272.966133 | 860.8264252 |   |
| 1249.488353 |             |             |             |             |   |
| NYAP2       | NYAP2       | 0           | 0           | 6.690360818 | 0 |
| F8          | F8          | 623.965235  | 641.7650836 | 687.9921041 |   |
| 976.8370483 |             |             |             |             |   |
| HTR7        | HTR7        | 8.33342551  | 4.401680957 | 12.2656615  |   |
| 15.69216142 |             |             |             |             |   |
| CARD8       | CARD8       | 5013.597122 | 4648.175091 | 4342.044171 |   |
| 4179.999498 |             |             |             |             |   |
| GABRB2      | GABRB2      | 0           | 0           | 1.961520177 |   |
| XPNPEP2     | XPNPEP2     | 120.8346699 | 76.58924866 | 5.575300681 |   |
| 28.44204257 |             |             |             |             |   |
| ZFP36       | ZFP36       | 3344.828664 | 4373.510199 | 5114.780845 |   |
| 5512.852458 |             |             |             |             |   |
| OFD1        | OFD1        | 954.1772208 | 784.3795466 | 2457.59254  |   |
| 1747.714478 |             |             |             |             |   |
| YWHAB       | YWHAB       | 31068.05198 | 29343.36593 | 23910.2345  |   |
| 25973.46943 |             |             |             |             |   |
| CAPZA1      | CAPZA1      | 49644.29912 | 38394.98265 | 32772.73246 |   |
| 32339.58316 |             |             |             |             |   |
| CLDN7       | CLDN7       | 88.54264604 | 71.30723151 | 130.4620359 |   |
| 132.402612  |             |             |             |             |   |
| DPH2        | DPH2        | 6488.613437 | 3523.985774 | 5851.835595 |   |
| 5811.003525 |             |             |             |             |   |
| DPAGT1      | DPAGT1      | 7200.07964  | 5498.579852 | 4811.484488 |   |
| 5745.292599 |             |             |             |             |   |
| ZNF132      | ZNF132      | 143.75159   | 131.1700925 | 247.5433503 |   |
| 240.2862217 |             |             |             |             |   |
| CCDC88A     | CCDC88A     | 200.0022122 | 217.4430393 | 189.5602232 |   |
| 296.1895468 |             |             |             |             |   |
| EIF4EBP2    | EIF4EBP2    |             | 7771.960966 | 9600.946504 |   |
| 8318.348617 | 8064.790209 |             |             |             |   |
| CDCA4       | CDCA4       | 6242.777385 | 5190.462185 | 4861.662194 |   |
| 4962.646049 |             |             |             |             |   |
| MTCH2       | MTCH2       | 11598.04495 | 8959.18142  | 7154.225834 |   |
| 7814.696387 |             |             |             |             |   |
| SEC24B-AS1  | SEC24B-AS1  |             | 58.33397857 | 65.14487817 |   |

|                 |                 |             |             |             |             |
|-----------------|-----------------|-------------|-------------|-------------|-------------|
| 49.062646       | 64.73016585     |             |             |             |             |
| LOC101926944    | LOC101926944    | 4.166712755 | 0.880336191 | 0           |             |
|                 | 5.884560532     |             |             |             |             |
| PPP1R8          | PPP1R8          | 817.7173781 | 3594.41267  | 1510.906485 |             |
| 1621.196427     |                 |             |             |             |             |
| KIF23           | KIF23           | 7585.50057  | 6542.658575 | 3282.737041 |             |
| 4524.246289     |                 |             |             |             |             |
| SUN1            | SUN1            | 2259.399991 | 2468.462681 | 3172.346088 |             |
| 3370.872425     |                 |             |             |             |             |
| SUM01           | SUM01           | 13105.35329 | 11676.77924 | 9074.359389 |             |
| 10093.98283     |                 |             |             |             |             |
| UBE2I           | UBE2I           | 5951.107492 | 9351.811362 | 5825.074152 |             |
| 5828.657207     |                 |             |             |             |             |
| UBE2H           | UBE2H           | 2775.030695 | 3520.46443  | 3151.159945 |             |
| 3149.220645     |                 |             |             |             |             |
| LINC00152       | LINC00152       |             | 3436.496345 | 3941.265129 |             |
| 2058.401012     | 2436.20806      |             |             |             |             |
| LOC100270804    | LOC100270804    | 60.41733494 | 42.25613719 |             |             |
| 132.6921562     | 112.7874102     |             |             |             |             |
| DKFZP434K028    | DKFZP434K028    | 0           | 0           | 0           | 2.942280266 |
| MGC12916        | MGC12916        | 1643.768182 | 2442.052595 |             |             |
| 547.4945269     | 567.8600913     |             |             |             |             |
| DNASE1L1        | DNASE1L1        | 758.3417214 | 974.5321639 |             |             |
| 702.4878858     | 855.2227973     |             |             |             |             |
| MSS51           | MSS51           | 16.66685102 | 50.17916291 | 3.345180409 |             |
| 19.61520177     |                 |             |             |             |             |
| ACTR3B          | ACTR3B          | 289.5865365 | 305.4766584 | 583.1764513 |             |
| 703.2049836     |                 |             |             |             |             |
| ELF1            | ELF1            | 8852.181248 | 9151.975046 | 15126.90581 |             |
| 9535.930342     |                 |             |             |             |             |
| ARNTL           | ARNTL           | 2811.489431 | 2214.045521 | 3199.107531 |             |
| 3497.390476     |                 |             |             |             |             |
| PODNL1          | PODNL1          | 8.33342551  | 15.84605145 | 7.805420954 |             |
| 0.980760089     |                 |             |             |             |             |
| CCDC134         | CCDC134         | 426.0463792 | 517.6376806 | 424.8379119 |             |
| 378.5733942     |                 |             |             |             |             |
| ATP1B3          | ATP1B3          | 17524.15217 | 14415.50513 | 14031.91675 |             |
| 14708.45905     |                 |             |             |             |             |
| ZEB1            | ZEB1            | 3753.166514 | 3912.214035 | 4227.192977 |             |
| 3945.597837     |                 |             |             |             |             |
| TNFAIP8L2-SCNM1 | TNFAIP8L2-SCNM1 | 3265.661122 | 2543.291257 |             |             |
| 2497.734705     | 2560.764592     |             |             |             |             |
| LHPP            | LHPP            | 243.7526962 | 407.5956566 | 273.1897334 |             |
| 298.151067      |                 |             |             |             |             |
| PAIP1           | PAIP1           | 3585.456326 | 3142.800203 | 3587.148458 |             |
| 3489.544395     |                 |             |             |             |             |
| CPSF4           | CPSF4           | 2404.19326  | 2330.249899 | 1930.169096 |             |
| 2167.479796     |                 |             |             |             |             |
| MS4A13          | MS4A13          | 2.083356377 | 0           | 0           | 0           |
| ATP4A           | ATP4A           | 0           | 0           | 7.805420954 | 0           |

|             |          |             |             |             |
|-------------|----------|-------------|-------------|-------------|
| MVD         | MVD      | 2975.032907 | 3529.267791 | 1778.520917 |
| 3058.009956 |          |             |             |             |
| COX4I1      | COX4I1   | 18707.49859 | 18265.2153  | 15512.71662 |
| 14873.22674 |          |             |             |             |
| SLC31A1     | SLC31A1  | 1888.562556 | 1606.613549 | 1449.578177 |
| 1401.506167 |          |             |             |             |
| GRIK4       | GRIK4    | 3.125034566 | 4.401680957 | 0           |
| ZNF714      | ZNF714   | 1186.471457 | 1942.021638 | 4.903800443 |
| 1006.259851 |          |             |             | 878.6673874 |
| CFAP99      | CFAP99   | 0           | 0           | 4.903800443 |
| TYW1B       | TYW1B    | 123.9597045 | 365.3395194 | 166.1439603 |
| 397.2078359 |          |             |             |             |
| RFX4        | RFX4     | 20.83356377 | 8.803361914 | 13.38072164 |
| 13.73064124 |          |             |             |             |
| CDKN2D      | CDKN2D   | 2562.528344 | 2619.00017  | 2148.720883 |
| 2752.993569 |          |             |             |             |
| TRMT2B      | TRMT2B   | 1722.935724 | 2115.447868 | 2659.418425 |
| 2274.382646 |          |             |             |             |
| ZBTB48      | ZBTB48   | 780.2169633 | 789.6615637 | 926.6149732 |
| 818.934674  |          |             |             |             |
| MSRB2       | MSRB2    | 311.4617784 | 551.970792  | 374.6602058 |
| 476.6494031 |          |             |             |             |
| NUBP2       | NUBP2    | 4999.013628 | 3972.076896 | 3715.380374 |
| 4259.441065 |          |             |             |             |
| DDX27       | DDX27    | 5461.518743 | 4042.503791 | 6213.115079 |
| 5456.949133 |          |             |             |             |
| OR2B2       | OR2B2    | 0           | 0.880336191 | 0           |
| NEFH        | NEFH     | 692.7159955 | 640.0044112 | 559.7601884 |
| 714.9741046 |          |             |             |             |
| RDH14       | RDH14    | 1241.680401 | 1052.882085 | 1865.495608 |
| 1414.256048 |          |             |             |             |
| INPP5E      | INPP5E   | 818.7590563 | 916.4299753 | 741.5149906 |
| 918.9722031 |          |             |             |             |
| CAMSAP2     | CAMSAP2  | 43.75048393 | 85.39261057 | 156.1084191 |
| 90.22992816 |          |             |             |             |
| TEPP        | TEPP     | 3.125034566 | 0.880336191 | 25.64638313 |
| 13.73064124 |          |             |             |             |
| PPARD       | PPARD    | 631.2569824 | 1121.548308 | 955.6065368 |
| 998.4137703 |          |             |             |             |
| GPHN        | GPHN     | 744.7999049 | 986.8568706 | 1009.129423 |
| 1115.124221 |          |             |             |             |
| SYCP2       | SYCP2    | 83.3342551  | 260.5795127 | 63.55842777 |
| 174.5752958 |          |             |             |             |
| CNPY2       | CNPY2    | 6976.11883  | 5368.290095 | 5306.571188 |
| 5052.875977 |          |             |             |             |
| MY01A       | MY01A    | 13.54181645 | 22.00840479 | 43.48734531 |
| 29.42280266 |          |             |             |             |
| ARMCX3      | ARMCX3   | 2309.400544 | 2579.385041 | 3197.992471 |
| 3156.085965 |          |             |             |             |
| SLC25A10    | SLC25A10 |             | 2390.651443 | 2400.676794 |

|                           |               |             |               |  |
|---------------------------|---------------|-------------|---------------|--|
| 1389.36493                | 1794.790962   |             |               |  |
| GDPD1 GDPD1               | 65.62572589   | 77.46958485 | 114.851194    |  |
| 61.78788559               |               |             |               |  |
| TBX20 TBX20               | 3.125034566   | 3.521344766 | 0 0           |  |
| S1PR5 S1PR5               | 0 0           | 68.01866831 | 33.34584301   |  |
| TLCD2 TLCD2               | 3.125034566   | 5.282017149 | 0 11.76912106 |  |
| PGR PGR                   | 0 0           | 1.115060136 | 0.980760089   |  |
| TSEN54 TSEN54             | 3363.578871   | 2686.786056 | 2518.920848   |  |
| 3148.239885               |               |             |               |  |
| C3orf35 C3orf35           | 0 1.760672383 | 2.230120273 | 7.846080709   |  |
| GPAT2 GPAT2               | 1222.930194   | 663.7734883 | 868.6318462   |  |
| 885.6263601               |               |             |               |  |
| IFF02 IFF02               | 164.5851538   | 529.0820511 | 289.9156354   |  |
| 472.7263627               |               |             |               |  |
| AKIRIN1 AKIRIN1           | 8266.758106   | 6678.230348 | 8409.783548   |  |
| 7325.297102               |               |             |               |  |
| PMS2CL PMS2CL             | 361.4623315   | 293.1519517 | 483.9360991   |  |
| 427.6113987               |               |             |               |  |
| NUDT4P1 NUDT4P1           | 5663.604312   | 4214.169348 | 5317.72179    |  |
| 4846.916358               |               |             |               |  |
| GTF2IP1 GTF2IP1           | 141.6682337   | 208.6396774 | 128.2319157   |  |
| 139.2679326               |               |             |               |  |
| LOC100288162 LOC100288162 |               | 82.29257691 | 294.0322879   |  |
| 240.8529894               | 263.8244639   |             |               |  |
| CAND1.11 CAND1.11         |               | 0 0         | 0 5.884560532 |  |
| GIMAP6 GIMAP6             | 5422.97665    | 7392.183    | 7457.522191   |  |
| 5713.908277               |               |             |               |  |
| STPG2 STPG2               | 1.041678189   | 0.880336191 | 6.690360818   |  |
| 2.942280266               |               |             |               |  |
| FAM49A FAM49A             | 32.29202385   | 187.5116088 | 148.3029981   |  |
| 524.7066474               |               |             |               |  |
| C19orf52 C19orf52         |               | 1377.098565 | 1187.573522   |  |
| 1169.698083               | 1077.855337   |             |               |  |
| TP53I13 TP53I13           | 1630.226365   | 1704.330867 | 1170.813143   |  |
| 1508.409016               |               |             |               |  |
| NCOR1 NCOR1               | 9014.683045   | 8438.902731 | 8456.616073   |  |
| 8588.516096               |               |             |               |  |
| PDXDC1 PDXDC1             | 7367.789829   | 6244.224606 | 7437.451109   |  |
| 7117.375963               |               |             |               |  |
| TTPAL TTPAL               | 1863.56228    | 2295.036451 | 1839.849225   |  |
| 2408.746778               |               |             |               |  |
| SLC27A3 SLC27A3           | 298.9616402   | 461.2961643 | 236.3927489   |  |
| 328.5546297               |               |             |               |  |
| UBE2F UBE2F               | 7167.787616   | 6607.803453 | 4562.826078   |  |
| 5262.758636               |               |             |               |  |
| ZC3H13 ZC3H13             | 3119.826175   | 3491.413335 | 3942.852642   |  |
| 3885.771471               |               |             |               |  |
| SPTLC1 SPTLC1             | 7203.204675   | 4326.852381 | 5360.094075   |  |
| 4783.166952               |               |             |               |  |
| MIF4GD MIF4GD             | 4212.546595   | 4336.536079 | 2891.350933   |  |

|             |          |             |             |             |             |
|-------------|----------|-------------|-------------|-------------|-------------|
| 4135.865294 |          |             |             |             |             |
| FBX044      | FBX044   | 386.462608  | 377.6642261 | 566.4505492 |             |
| 457.0342013 |          |             |             |             |             |
| ASB7        | ASB7     | 1713.56062  | 2029.174921 | 2352.776888 |             |
| 2014.481222 |          |             |             |             |             |
| CFAP43      | CFAP43   | 3.125034566 | 4.401680957 | 2.230120273 |             |
| 9.807600887 |          |             |             |             |             |
| ARHGEF16    | ARHGEF16 | 0           | 0           | 0           | 3.923040355 |
| ARL14       | ARL14    | 0           | 0           | 10.03554123 | 0           |
| SEMA4C      | SEMA4C   | 63.54236951 | 220.9643841 | 190.6752833 |             |
| 189.2866971 |          |             |             |             |             |
| LARP1       | LARP1    | 2966.699481 | 5894.731138 | 3758.867719 |             |
| 3302.219219 |          |             |             |             |             |
| FANCE       | FANCE    | 1273.972425 | 1287.931848 | 1163.007722 |             |
| 1074.913057 |          |             |             |             |             |
| HECW2       | HECW2    | 68.75076045 | 96.83698106 | 65.78854804 |             |
| 111.8066501 |          |             |             |             |             |
| ARMC5       | ARMC5    | 704.1744556 | 930.5153543 | 634.4692175 |             |
| 686.5320621 |          |             |             |             |             |
| NCAPG2      | NCAPG2   | 11684.50424 | 11980.49523 | 6533.137338 |             |
| 8388.441038 |          |             |             |             |             |
| IN080D      | IN080D   | 887.5098168 | 1309.059917 | 1146.28182  |             |
| 1021.952012 |          |             |             |             |             |
| ZNF667      | ZNF667   | 10.41678189 | 4.401680957 | 72.47890886 |             |
| 26.48052239 |          |             |             |             |             |
| CHTF18      | CHTF18   | 2027.105755 | 2393.634105 | 1217.645669 |             |
| 2146.883834 |          |             |             |             |             |
| TMSB15A     | TMSB15A  | 8.33342551  | 46.65781815 | 11.15060136 |             |
| 44.13420399 |          |             |             |             |             |
| GPR27       | GPR27    | 54.16726581 | 132.9307649 | 47.94758586 |             |
| 67.67244612 |          |             |             |             |             |
| WDR5B       | WDR5B    | 144.7932682 | 188.391945  | 580.946331  |             |
| 397.2078359 |          |             |             |             |             |
| BRWD3       | BRWD3    | 148.959981  | 446.3304491 | 217.4367266 |             |
| 202.0365783 |          |             |             |             |             |
| CENPM       | CENPM    | 5768.813809 | 5472.169766 | 2797.685882 |             |
| 3960.309238 |          |             |             |             |             |
| TAC3        | TAC3     | 2.083356377 | 5.282017149 | 0           | 5.884560532 |
| PUSL1       | PUSL1    | 1828.145221 | 1395.332863 | 1235.486631 |             |
| 1458.390252 |          |             |             |             |             |
| GGT6        | GGT6     | 0           | 6.16235334  | 1.115060136 | 0           |
| MYOF        | MYOF     | 991.6776356 | 1904.167182 | 506.2373019 |             |
| 571.7831317 |          |             |             |             |             |
| DNAJB12     | DNAJB12  | 3990.669141 | 3075.894653 | 3219.178613 |             |
| 3027.606394 |          |             |             |             |             |
| ZDHHC13     | ZDHHC13  | 4605.259272 | 3628.745781 | 2731.897334 |             |
| 3515.044158 |          |             |             |             |             |
| AHCTF1      | AHCTF1   | 4561.508788 | 5443.999008 | 5928.774745 |             |
| 5253.931795 |          |             |             |             |             |
| NR1D2       | NR1D2    | 395.8377117 | 474.5012072 | 3671.893029 |             |

|             |             |             |             |             |             |
|-------------|-------------|-------------|-------------|-------------|-------------|
| 1498.601415 |             |             |             |             |             |
| VPS52       | VPS52       | 2.083356377 | 68.66622293 | 0           | 79.44156718 |
| GIMAP7      | GIMAP7      | 12447.01268 | 13332.69162 | 16626.66169 |             |
| 12897.97593 |             |             |             |             |             |
| NRN1        | NRN1        | 15.62517283 | 85.39261057 | 23.41626286 |             |
| 45.11496408 |             |             |             |             |             |
| CCDC36      | CCDC36      | 1.041678189 | 2.641008574 | 0           | 0           |
| NCR1        | NCR1        | 2.083356377 | 0           | 23.41626286 | 2.942280266 |
| TOR1AIP2    | TOR1AIP2    |             | 1503.141626 | 1839.022304 |             |
| 1630.217919 |             | 1465.255572 |             |             |             |
| DNAL1       | DNAL1       | 225.0024888 | 351.2541404 | 195.1355238 |             |
| 279.5166253 |             |             |             |             |             |
| SCARNA23    | SCARNA23    |             | 5.208390943 | 4.401680957 |             |
| 1.115060136 | 1.961520177 |             |             |             |             |
| GUSBP2      | GUSBP2      | 36.4587366  | 39.61512861 | 37.91204463 |             |
| 51.9802847  |             |             |             |             |             |
| SLC35C2     | SLC35C2     | 3283.369651 | 2558.256972 | 2160.986544 |             |
| 3241.412093 |             |             |             |             |             |
| BCL7B       | BCL7B       | 6813.617032 | 5448.400689 | 4784.723045 |             |
| 4822.397356 |             |             |             |             |             |
| DNAJA1      | DNAJA1      | 35669.14454 | 20072.5455  | 40331.72513 |             |
| 29459.09078 |             |             |             |             |             |
| UHMK1       | UHMK1       | 9204.268475 | 10836.93852 | 9155.758779 |             |
| 7494.968598 |             |             |             |             |             |
| FZD6        | FZD6        | 2043.772606 | 1865.43239  | 928.8450935 |             |
| 776.7619902 |             |             |             |             |             |
| SNORD116-20 | SNORD116-20 |             | 1.041678189 | 2.641008574 |             |
| 2.230120273 | 0.980760089 |             |             |             |             |
| SNORD116-18 | SNORD116-18 |             | 2.083356377 | 0           | 1.115060136 |
| 3.923040355 |             |             |             |             |             |
| SNORD116-17 | SNORD116-17 |             | 4.166712755 | 2.641008574 | 0           |
| 1.961520177 |             |             |             |             |             |
| SNORD116-24 | SNORD116-24 |             | 0           | 0.880336191 | 2.230120273 |
| 0           |             |             |             |             |             |
| SNORD116-25 | SNORD116-25 |             | 0           | 0           | 4.460240545 |
| 0.980760089 |             |             |             |             |             |
| SNORD116-26 | SNORD116-26 |             | 0           | 4.401680957 | 0           |
| 4.903800443 |             |             |             |             |             |
| SNORD116-27 | SNORD116-27 |             | 0           | 0           | 1.115060136 |
|             |             |             |             |             | 0           |
| POMK        | POMK        | 295.8366056 | 380.3052347 | 104.8156528 |             |
| 224.5940603 |             |             |             |             |             |
| NR1H2       | NR1H2       | 5315.683797 | 4294.279942 | 7025.993919 |             |
| 5449.103053 |             |             |             |             |             |
| LTA4H       | LTA4H       | 4743.802471 | 3830.342769 | 3971.844205 |             |
| 5023.453174 |             |             |             |             |             |
| NCOA5       | NCOA5       | 4225.046733 | 4205.365986 | 4629.729686 |             |
| 3800.445344 |             |             |             |             |             |
| KIAA1524    | KIAA1524    |             | 4139.629122 | 4251.143468 |             |
| 2167.676905 | 3000.145111 |             |             |             |             |
| DIABLO      | DIABLO      | 4656.301503 | 3703.574357 | 4921.875441 |             |



|             |         |             |             |             |   |
|-------------|---------|-------------|-------------|-------------|---|
| 5060.722058 |         |             |             |             |   |
| AATF        | AATF    | 8355.300752 | 6231.899899 | 7269.077028 |   |
| 6079.73179  |         |             |             |             |   |
| TOR3A       | TOR3A   | 6644.865166 | 5031.121334 | 5605.407305 |   |
| 4734.128948 |         |             |             |             |   |
| OCLM        | OCLM    | 16.66685102 | 25.52974955 | 21.18614259 |   |
| 22.55748204 |         |             |             |             |   |
| SLC6A20     | SLC6A20 | 22.91692015 | 6.16235334  | 17.84096218 | 0 |
| MST4        | MST4    | 4531.300121 | 4815.438967 | 4615.233904 |   |
| 5294.142959 |         |             |             |             |   |
| SDF4        | SDF4    | 8454.260179 | 6268.874019 | 6675.865036 |   |
| 6910.435585 |         |             |             |             |   |
| DNAJC27     | DNAJC27 | 112.5012444 | 195.4346345 | 414.8023707 |   |
| 280.4973854 |         |             |             |             |   |
| FAM21C      | FAM21C  | 1880.229131 | 1882.158777 | 2252.421475 |   |
| 2261.632764 |         |             |             |             |   |
| COX15       | COX15   | 4618.801089 | 3766.078227 | 3575.997857 |   |
| 3361.064824 |         |             |             |             |   |
| MED9        | MED9    | 1108.345593 | 1122.428644 | 1362.603487 |   |
| 1253.411393 |         |             |             |             |   |
| FAM57B      | FAM57B  | 2.083356377 | 7.923025723 | 10.03554123 |   |
| 10.78836098 |         |             |             |             |   |
| COPB2       | COPB2   | 16342.8891  | 14329.23219 | 12681.57893 |   |
| 14569.19112 |         |             |             |             |   |
| CCDC135     | CCDC135 | 0           | 4.401680957 | 0           | 0 |
| GABRR1      | GABRR1  | 0           | 0           | 0.980760089 |   |
| AP1S2       | AP1S2   | 2768.780626 | 1976.35475  | 2486.584104 |   |
| 2054.692386 |         |             |             |             |   |
| ACSS2       | ACSS2   | 1208.346699 | 1622.459601 | 1245.522172 |   |
| 2197.883359 |         |             |             |             |   |
| SF3B5       | SF3B5   | 6443.821275 | 6622.769168 | 5292.075407 |   |
| 5376.526806 |         |             |             |             |   |
| ENOX2       | ENOX2   | 1391.68206  | 1257.120081 | 1393.82517  |   |
| 1505.466736 |         |             |             |             |   |
| DDX58       | DDX58   | 3905.251529 | 1942.021638 | 9309.637078 |   |
| 2995.241311 |         |             |             |             |   |
| SLC16A3     | SLC16A3 | 105.2094971 | 473.620871  | 88.08975076 |   |
| 209.882659  |         |             |             |             |   |
| ZNF596      | ZNF596  | 169.7935448 | 93.31563629 | 221.8969671 |   |
| 210.8634191 |         |             |             |             |   |
| CEP170      | CEP170  | 1107.303915 | 1462.238414 | 1401.630591 |   |
| 1545.6779   |         |             |             |             |   |
| KCTD19      | KCTD19  | 12.50013826 | 19.36739621 | 3.345180409 |   |
| 10.78836098 |         |             |             |             |   |
| NRAS        | NRAS    | 10827.20309 | 11310.55939 | 5910.933782 |   |
| 8512.99757  |         |             |             |             |   |
| ZNF142      | ZNF142  | 1269.805712 | 1803.808856 | 1985.922103 |   |
| 1576.081462 |         |             |             |             |   |
| SLC52A1     | SLC52A1 | 22.91692015 | 13.20504287 | 47.94758586 |   |
| 18.63444168 |         |             |             |             |   |

|           |           |             |             |             |             |             |             |
|-----------|-----------|-------------|-------------|-------------|-------------|-------------|-------------|
| NRXN3     | NRXN3     | 0           | 0           | 0           | 1.961520177 |             |             |
| TSPAN14   | TSPAN14   | 10298.03057 |             | 11047.33887 |             | 7939.22817  |             |
|           |           | 8395.306359 |             |             |             |             |             |
| MEFV      | MEFV      | 1.041678189 |             | 4.401680957 |             | 16.72590204 |             |
|           |           | 5.884560532 |             |             |             |             |             |
| DNMT1     | DNMT1     | 10457.40734 |             | 13694.50979 |             | 8224.683565 |             |
|           |           | 11020.80112 |             |             |             |             |             |
| ACAD10    | ACAD10    | 1180.221388 |             | 1134.753351 |             | 1113.945076 |             |
|           |           | 1757.522079 |             |             |             |             |             |
| ZNF727P   | ZNF727P   | 0           | 0           | 0           | 10.78836098 |             |             |
| TCF3      | TCF3      | 1654.184964 |             | 2552.974955 |             | 1383.789629 |             |
|           |           | 1902.674572 |             |             |             |             |             |
| CMPK1     | CMPK1     | 12483.47141 |             | 11476.94293 |             | 10247.40265 |             |
|           |           | 10262.67357 |             |             |             |             |             |
| CYP4F12   | CYP4F12   | 0           | 0           | 4.460240545 |             | 1.961520177 |             |
| C12orf10  | C12orf10  |             |             | 2613.570575 |             | 2057.345679 |             |
|           |           | 2518.920848 | 2326.36293  |             |             |             |             |
| LRRC61    | LRRC61    | 2988.574723 |             | 1813.492554 |             | 1774.060677 |             |
|           |           | 1660.42683  |             |             |             |             |             |
| MIS12     | MIS12     | 2822.947891 |             | 2609.316471 |             | 4121.262264 |             |
|           |           | 3514.063398 |             |             |             |             |             |
| CAPRIN2   | CAPRIN2   | 214.5857069 |             | 273.7845555 |             | 519.6180235 |             |
|           |           | 426.6306386 |             |             |             |             |             |
| MAN1A1    | MAN1A1    | 8933.432146 |             | 8835.934353 |             | 4890.653758 |             |
|           |           | 5367.699965 |             |             |             |             |             |
| ZYG11B    | ZYG11B    | 852.0927584 |             | 1565.237748 |             | 1629.102859 |             |
|           |           | 1799.694763 |             |             |             |             |             |
| THNSL2    | THNSL2    | 0           | 7.042689532 | 33.45180409 |             | 18.63444168 |             |
| SLC50A1   | SLC50A1   | 1965.646742 |             | 1933.218276 |             | 2554.602772 |             |
|           |           | 2681.398082 |             |             |             |             |             |
| POLD1     | POLD1     | 8456.343536 |             | 9948.679299 |             | 5404.69648  |             |
|           |           | 10118.50183 |             |             |             |             |             |
| HYKK      | HYKK      | 30.20866747 |             | 70.42689532 |             | 42.37228518 |             |
|           |           | 33.34584301 |             |             |             |             |             |
| MIR7155   | MIR7155   | 0           | 0           | 0           | 0.980760089 |             |             |
| MIR6511A2 | MIR6511A2 |             |             | 0           | 4.401680957 | 0           | 0           |
| FAM90A1   | FAM90A1   | 25.00027653 |             | 2.641008574 |             | 4.460240545 |             |
|           |           | 7.846080709 |             |             |             |             |             |
| ENPP1     | ENPP1     | 22.91692015 |             | 20.2477324  |             | 10.03554123 |             |
|           |           | 39.23040355 |             |             |             |             |             |
| ARHGEF11  | ARHGEF11  |             |             | 430.2130919 |             | 550.2101196 |             |
|           |           | 400.3065889 | 283.4396656 |             |             |             |             |
| PYROXD1   | PYROXD1   | 6831.325561 |             | 6455.505292 |             | 5016.655553 |             |
|           |           | 6450.459103 |             |             |             |             |             |
| IMP3      | IMP3      | 7202.162997 |             | 5834.868277 |             | 6993.657175 |             |
|           |           | 6143.481195 |             |             |             |             |             |
| N4BP3     | N4BP3     | 95.83439336 |             | 61.6235334  |             | 159.4535995 |             |
|           |           | 209.882659  |             |             |             |             |             |
| LDHC      | LDHC      | 5.208390943 |             | 7.042689532 |             | 0           | 5.884560532 |
| CELSR2    | CELSR2    | 28.12531109 |             | 52.82017149 |             | 65.78854804 |             |

|             |             |             |             |             |
|-------------|-------------|-------------|-------------|-------------|
| 38.24964346 |             |             |             |             |
| BAIAP3      | BAIAP3      | 1444.807648 | 1114.505618 | 1218.760729 |
| 1333.833721 |             |             |             |             |
| ANKS1A      | ANKS1A      | 442.7132302 | 708.6706341 | 545.2644066 |
| 713.9933446 |             |             |             |             |
| C12orf4     | C12orf4     | 2591.695333 | 2207.002832 | 1604.571536 |
| 1604.523505 |             |             |             |             |
| AVEN        | AVEN        | 1211.471733 | 873.2935019 | 778.3119751 |
| 845.4151964 |             |             |             |             |
| EPHA6       | EPHA6       | 0           | 1.760672383 | 0           |
| SLC9A9      | SLC9A9      | 1112.512306 | 2095.200136 | 423.7228518 |
| 1002.336811 |             |             |             |             |
| FREM1       | FREM1       | 0           | 0           | 5.575300681 |
| ENGASE      | ENGASE      | 509.3806343 | 702.5082808 | 13.73064124 |
| 823.8384745 |             |             |             | 570.9107898 |
| COR07-PAM16 | COR07-PAM16 |             | 9173.01813  | 9346.529344 |
| 5228.516979 | 6320.018011 |             |             |             |
| CTSZ        | CTSZ        | 94.79271517 | 106.5206792 | 56.86806695 |
| 76.49928692 |             |             |             |             |
| GPR137      | GPR137      | 1455.22443  | 1534.425982 | 1274.513736 |
| 1162.200705 |             |             |             |             |
| RPH3AL      | RPH3AL      | 71.87579502 | 90.67462772 | 32.33674395 |
| 131.4218519 |             |             |             |             |
| SLC16A4     | SLC16A4     | 27.08363291 | 52.82017149 | 45.71746559 |
| 34.3266031  |             |             |             |             |
| ARHGEF33    | ARHGEF33    |             | 39.58377117 | 36.97412004 |
| 43.48734531 | 37.26888337 |             |             |             |
| PPP2R4      | PPP2R4      | 743.7582267 | 2361.061665 | 653.4252399 |
| 560.9947707 |             |             |             |             |
| GALR1       | GALR1       | 0           | 1.760672383 | 0           |
| B4GALNT1    | B4GALNT1    |             | 91.66768061 | 139.0931182 |
| 50.17770613 | 82.38384745 |             |             |             |
| HSDL2       | HSDL2       | 2292.733693 | 2343.454942 | 2278.067858 |
| 2405.804498 |             |             |             |             |
| SEPT5-GP1BB | SEPT5-GP1BB |             | 3.125034566 | 7.042689532 |
| 64.6734879  | 35.30736319 |             |             |             |
| AG02        | AG02        | 2909.407181 | 2836.443209 | 2877.970212 |
| 2841.261977 |             |             |             |             |
| IFIT3       | IFIT3       | 3561.497727 | 258.8188403 | 69857.40248 |
| 9745.813001 |             |             |             |             |
| SSBP4       | SSBP4       | 3421.91285  | 3725.582762 | 2052.825711 |
| 2936.395705 |             |             |             |             |
| GSTM3       | GSTM3       | 768.7585033 | 622.3976873 | 2050.595591 |
| 1157.296905 |             |             |             |             |
| MORC4       | MORC4       | 454.1716903 | 393.5102776 | 809.5336589 |
| 730.6662661 |             |             |             |             |
| MAML2       | MAML2       | 196.8771777 | 614.4746616 | 1237.716751 |
| 1175.931346 |             |             |             |             |
| CARD11      | CARD11      | 3279.202938 | 4660.499797 | 2775.384679 |
| 3934.809476 |             |             |             |             |

|              |              |             |             |             |             |
|--------------|--------------|-------------|-------------|-------------|-------------|
| LOC100130880 | LOC100130880 | 2.083356377 | 0           | 0           | 0           |
| EDN3         | EDN3         | 5.208390943 | 1.760672383 | 28.99156354 |             |
| 10.78836098  |              |             |             |             |             |
| CARD16       | CARD16       | 2183.357484 | 1789.723477 | 2028.294388 |             |
| 1226.930871  |              |             |             |             |             |
| NTPCR        | NTPCR        | 976.0524628 | 1213.983608 | 992.4035213 |             |
| 1247.526833  |              |             |             |             |             |
| KLRC3        | KLRC3        | 3.125034566 | 0           | 44.60240545 | 0           |
| ACAA2        | ACAA2        | 14343.90866 | 9265.538415 | 8317.233556 |             |
| 7318.431782  |              |             |             |             |             |
| TSNAX        | TSNAX        | 3743.79141  | 3185.936677 | 4512.648371 |             |
| 3648.42753   |              |             |             |             |             |
| XBP1         | XBP1         | 11999.09106 | 12999.92454 | 19204.68073 |             |
| 12340.9042   |              |             |             |             |             |
| KCND3        | KCND3        | 0           | 0           | 0.980760089 |             |
| KIF11        | KIF11        | 12750.14103 | 14764.11827 | 5414.732022 |             |
| 8203.077382  |              |             |             |             |             |
| TMCC1-AS1    | TMCC1-AS1    |             | 70.83411683 | 52.82017149 |             |
| 55.75300681  | 60.8071255   |             |             |             |             |
| LILRA5       | LILRA5       | 1.041678189 | 0           | 0           | 0           |
| C21orf90     | C21orf90     |             | 0           | 0           | 0.980760089 |
| BBS9         | BBS9         | 455.2133685 | 382.0659071 | 428.1830923 |             |
| 631.6094971  |              |             |             |             |             |
| ARL5A        | ARL5A        | 8341.758935 | 6787.392036 | 6165.167493 |             |
| 6743.70637   |              |             |             |             |             |
| KIAA1191     | KIAA1191     |             | 3204.202108 | 3274.850632 |             |
| 4015.331551  | 3764.15722   |             |             |             |             |
| CCDC24       | CCDC24       | 12.50013826 | 30.8117667  | 39.02710477 |             |
| 64.73016585  |              |             |             |             |             |
| SEL1L        | SEL1L        | 6489.655116 | 9304.273207 | 6995.887295 |             |
| 7111.491403  |              |             |             |             |             |
| PLCE1-AS1    | PLCE1-AS1    |             | 0           | 0           | 1.115060136 |
| LOC440700    | LOC440700    |             | 2.083356377 | 10.5640343  | 0           |
| 11.15060136  | 11.76912106  |             |             |             |             |
| EGLN2        | EGLN2        | 5465.685456 | 5691.373478 | 6455.083129 |             |
| 6294.518249  |              |             |             |             |             |
| WDR78        | WDR78        | 45.8338403  | 31.69210289 | 90.31987104 |             |
| 29.42280266  |              |             |             |             |             |
| KIAA0319L    | KIAA0319L    |             | 2854.198237 | 3367.285932 |             |
| 2253.536535  | 3549.370761  |             |             |             |             |
| TNIP3        | TNIP3        | 2063.564492 | 2856.690941 | 1363.718547 |             |
| 3281.623257  |              |             |             |             |             |
| PREX2        | PREX2        | 0           | 0           | 2.230120273 | 0.980760089 |
| FAM110D      | FAM110D      | 0           | 0           | 1.961520177 |             |
| MRM1         | MRM1         | 1030.219729 | 689.3032379 | 734.8246298 |             |
| 810.1078332  |              |             |             |             |             |
| C6orf1       | C6orf1       | 1202.09663  | 1122.428644 | 1421.701674 |             |
| 1043.528734  |              |             |             |             |             |
| LPHN1        | LPHN1        | 45.8338403  | 61.6235334  | 104.8156528 |             |
| 71.59548647  |              |             |             |             |             |

|              |              |             |             |             |
|--------------|--------------|-------------|-------------|-------------|
| EAF1         | EAF1         | 2089.606447 | 1929.696932 | 2020.488967 |
| 1497.620655  |              |             |             |             |
| LINC00673    | LINC00673    |             | 23.95859834 | 73.06790389 |
| 22.30120273  | 99.05676896  |             |             |             |
| SNORD109B    | SNORD109B    |             | 1.041678189 | 2.641008574 |
| 1.115060136  | 0.980760089  |             |             |             |
| TFAMP1       | TFAMP1       | 0           | 0           | 0.980760089 |
| MYBPC1       | MYBPC1       | 1.041678189 | 0           | 0           |
| APOLD1       | APOLD1       | 381.2542171 | 482.4242329 | 205.1710651 |
| 343.266031   |              |             |             |             |
| ER01L        | ER01L        | 10903.2456  | 9372.059094 | 6417.171084 |
| 7699.947456  |              |             |             |             |
| ANXA10       | ANXA10       | 0           | 2.230120273 | 0           |
| HIP1R        | HIP1R        | 1577.100778 | 1815.253227 | 2032.754628 |
| 2207.69096   |              |             |             |             |
| SAA2-SAA4    | SAA2-SAA4    | 0           | 0.880336191 | 2.230120273 |
| 0            |              |             |             |             |
| SMC5         | SMC5         | 4418.798876 | 4193.921616 | 3923.89662  |
| 4009.347242  |              |             |             |             |
| PDK2         | PDK2         | 2094.814837 | 1678.801117 | 2144.260642 |
| 1791.848682  |              |             |             |             |
| TRIOBP       | TRIOBP       | 3060.450518 | 3266.927606 | 1699.351648 |
| 2574.495233  |              |             |             |             |
| SERPINB5     | SERPINB5     |             | 1.041678189 | 0           |
| PHKA1        | PHKA1        | 618.7568441 | 1209.581927 | 357.9343037 |
| 883.6648399  |              |             |             |             |
| SLC25A3      | SLC25A3      | 28565.94097 | 20414.99628 | 21133.73476 |
| 21703.24     |              |             |             |             |
| APOBEC3B-AS1 | APOBEC3B-AS1 |             | 1053.136649 | 1518.57993  |
| 394.7312882  | 670.8399006  |             |             |             |
| LINC01030    | LINC01030    |             | 1.041678189 | 0           |
| 0            |              |             |             | 1.115060136 |
| FLJ38122     | FLJ38122     |             | 0           | 0           |
| 51.9802847   |              |             |             | 202.9409448 |
| AOC3         | AOC3         | 10.41678189 | 4.401680957 | 0           |
| TMSB4Y       | TMSB4Y       | 0           | 99.47798963 | 0           |
| ITGA3        | ITGA3        | 98.95942793 | 447.2107853 | 350.1288828 |
| 420.746078   |              |             |             |             |
| HDC          | HDC          | 51.04223125 | 251.7761508 | 24.531323   |
| 166.7292151  |              |             |             |             |
| HTT          | HTT          | 1201.054952 | 2108.405178 | 1012.474604 |
| 1391.698566  |              |             |             |             |
| MED14        | MED14        | 2181.274127 | 3141.919867 | 2336.050985 |
| 2233.190722  |              |             |             |             |
| STX3         | STX3         | 1305.22277  | 423.4417081 | 1176.388444 |
| 696.339663   |              |             |             |             |
| OASL         | OASL         | 4113.587167 | 2350.497631 | 8754.33713  |
| 2875.58858   |              |             |             |             |
| SLC7A14      | SLC7A14      | 0           | 1.115060136 | 0.980760089 |
| MYH15        | MYH15        | 8.33342551  | 8.803361914 | 10.03554123 |

|             |             |             |             |             |             |
|-------------|-------------|-------------|-------------|-------------|-------------|
| 1.961520177 |             |             |             |             |             |
| SLC37A3     | SLC37A3     | 2991.699758 | 1730.740952 | 4536.064634 |             |
| 3286.527057 |             |             |             |             |             |
| CNOT1       | CNOT1       | 11944.92379 | 23988.28088 | 14794.61789 |             |
| 16253.15619 |             |             |             |             |             |
| MBD4        | MBD4        | 3105.242681 | 3075.014317 | 2947.10394  |             |
| 2868.723259 |             |             |             |             |             |
| TSG101      | TSG101      | 6841.742343 | 6246.865614 | 4868.352555 |             |
| 6617.188318 |             |             |             |             |             |
| PTK6        | PTK6        | 37.50041479 | 26.41008574 | 23.41626286 |             |
| 7.846080709 |             |             |             |             |             |
| WISP3       | WISP3       | 1.041678189 | 0.880336191 | 1.115060136 |             |
| 2.942280266 |             |             |             |             |             |
| GGH         | GGH         | 4968.80496  | 4135.819427 | 1959.160659 |             |
| 2250.844403 |             |             |             |             |             |
| TPP2        | TPP2        | 8420.926477 | 9694.26214  | 7214.439082 |             |
| 7267.432257 |             |             |             |             |             |
| DSC1        | DSC1        | 0           | 0           | 47.94758586 | 16.67292151 |
| SMC6        | SMC6        | 3925.043415 | 3386.653328 | 2639.347343 |             |
| 2269.478845 |             |             |             |             |             |
| SMPD4       | SMPD4       | 11800.13052 | 10068.40502 | 8326.154037 |             |
| 9218.164073 |             |             |             |             |             |
| CHST15      | CHST15      | 28.12531109 | 40.49546481 | 70.24878858 |             |
| 145.1524931 |             |             |             |             |             |
| SEMA4B      | SEMA4B      | 613.5484531 | 835.4390457 | 915.4643719 |             |
| 820.8961942 |             |             |             |             |             |
| ANXA2P2     | ANXA2P2     | 140.6265555 | 108.2813515 | 46.83252572 |             |
| 56.88408514 |             |             |             |             |             |
| DLEU7       | DLEU7       | 3.125034566 | 1.760672383 | 1.115060136 |             |
| 8.826840798 |             |             |             |             |             |
| NAPEPLD     | NAPEPLD     | 568.756291  | 728.0380303 | 626.6637966 |             |
| 720.8586652 |             |             |             |             |             |
| PPP1R32     | PPP1R32     | 42.70880574 | 92.4353001  | 80.28432981 |             |
| 91.21068825 |             |             |             |             |             |
| KIR2DS3     | KIR2DS3     | 0           | 0           | 6.690360818 | 0           |
| ITM2B       | ITM2B       | 11460.54343 | 9032.249324 | 26397.93367 |             |
| 14401.48114 |             |             |             |             |             |
| SLC17A9     | SLC17A9     | 102.0844625 | 278.1862365 | 118.1963744 |             |
| 161.8254146 |             |             |             |             |             |
| TMEM132A    | TMEM132A    |             | 0           | 10.5640343  | 8.92048109  |
| 22.55748204 |             |             |             |             |             |
| HOMER2      | HOMER2      | 1623.976296 | 447.2107853 | 529.6535647 |             |
| 196.1520177 |             |             |             |             |             |
| SERPINE2    | SERPINE2    |             | 1006.26113  | 1315.22227  |             |
| 974.5625591 | 1264.199754 |             |             |             |             |
| SERPINB1    | SERPINB1    |             | 2770.863982 | 3962.393198 |             |
| 5808.34825  | 6810.398056 |             |             |             |             |
| NHLRC3      | NHLRC3      | 1123.970766 | 1556.434386 | 822.9143806 |             |
| 1245.565313 |             |             |             |             |             |
| WDR86       | WDR86       | 0           | 2.641008574 | 7.805420954 | 4.903800443 |

|             |             |             |             |             |
|-------------|-------------|-------------|-------------|-------------|
| SIPA1L1     | SIPA1L1     | 3330.245169 | 3259.004581 | 3213.603313 |
| 3730.811377 |             |             |             |             |
| MORN4       | MORN4       | 135.4181645 | 250.0154784 | 200.7108245 |
| 270.6897845 |             |             |             |             |
| ELF2        | ELF2        | 1002.094418 | 1705.211203 | 2533.41663  |
| 1689.849633 |             |             |             |             |
| PER3        | PER3        | 788.5503888 | 1591.647834 | 1537.667928 |
| 1293.622557 |             |             |             |             |
| HMGCS1      | HMGCS1      | 426.0463792 | 3140.159195 | 788.3475163 |
| 1558.427781 |             |             |             |             |
| TFR2        | TFR2        | 303.1283529 | 220.9643841 | 178.4096218 |
| 367.7850333 |             |             |             |             |
| C17orf85    | C17orf85    |             | 2889.615295 | 3081.17667  |
| 2329.360625 | 2300.863168 |             |             |             |
| CHPF        | CHPF        | 1366.681784 | 1634.784308 | 1469.64926  |
| 1731.041557 |             |             |             |             |
| C5orf22     | C5orf22     | 3458.371586 | 2905.989768 | 3435.50028  |
| 2900.107582 |             |             |             |             |
| TMA16       | TMA16       | 1618.767905 | 1305.538572 | 1216.530609 |
| 1524.101178 |             |             |             |             |
| SECTM1      | SECTM1      | 405.2128154 | 411.1170014 | 362.3945443 |
| 580.6099725 |             |             |             |             |
| RALA        | RALA        | 3729.207916 | 4241.45977  | 4052.128535 |
| 3938.732516 |             |             |             |             |
| PTPN14      | PTPN14      | 51.04223125 | 129.4094201 | 72.47890886 |
| 112.7874102 |             |             |             |             |
| CST6        | CST6        | 26.04195472 | 22.88874098 | 8.92048109  |
| 56.88408514 |             |             |             |             |
| CNTNAP1     | CNTNAP1     | 12.50013826 | 60.74319721 | 39.02710477 |
| 16.67292151 |             |             |             |             |
| NME4        | NME4        | 327.0869513 | 470.9798624 | 467.2101971 |
| 1014.105932 |             |             |             |             |
| TMEM9       | TMEM9       | 970.8440719 | 1007.984939 | 1634.67816  |
| 1094.528259 |             |             |             |             |
| CIITA       | CIITA       | 1586.475881 | 2562.658653 | 375.7752659 |
| 621.8018962 |             |             |             |             |
| TMEM179     | TMEM179     | 1.041678189 | 0.880336191 | 0 0         |
| FAM120B     | FAM120B     | 3528.164025 | 2836.443209 | 3950.658063 |
| 3508.178837 |             |             |             |             |
| MCFD2       | MCFD2       | 4004.210957 | 3855.872518 | 3628.405683 |
| 4034.847005 |             |             |             |             |
| NELL2       | NELL2       | 1298.972701 | 830.1570285 | 5470.485029 |
| 2844.204257 |             |             |             |             |
| SAA2        | SAA2        | 1.041678189 | 1.760672383 | 0 0         |
| EGR2        | EGR2        | 1865.645636 | 2344.335278 | 3691.964111 |
| 7604.813728 |             |             |             |             |
| PIGR        | PIGR        | 0           | 0.880336191 | 2.230120273 |
| SLC30A3     | SLC30A3     | 7.291747321 | 18.48706002 | 22.55748204 |
| 46.09572417 |             |             |             | 54.63794668 |
| ATAD2       | ATAD2       | 12750.14103 | 14023.75553 | 7357.166779 |

|             |          |             |             |             |             |
|-------------|----------|-------------|-------------|-------------|-------------|
| 9546.718703 |          |             |             |             |             |
| CLEC9A      | CLEC9A   | 0           | 0.880336191 | 0           | 0           |
| TRPM7       | TRPM7    | 3343.786986 | 4944.848387 | 4414.523079 |             |
| 4655.668141 |          |             |             |             |             |
| CCDC22      | CCDC22   | 2593.77869  | 1861.030709 | 2065.091372 |             |
| 2206.7102   |          |             |             |             |             |
| C16orf58    | C16orf58 |             | 1591.684272 | 1549.391697 |             |
| 1542.128168 |          | 2161.595235 |             |             |             |
| GALNT8      | GALNT8   | 5.208390943 | 1.760672383 | 24.531323   |             |
| 26.48052239 |          |             |             |             |             |
| SEC61A1     | SEC61A1  | 27669.05605 | 20753.92571 | 21229.62993 |             |
| 18798.22862 |          |             |             |             |             |
| TRIM54      | TRIM54   | 12.50013826 | 12.32470668 | 7.805420954 |             |
| 10.78836098 |          |             |             |             |             |
| UBC         | UBC      | 74240.40451 | 53329.88614 | 78907.23054 |             |
| 62074.26753 |          |             |             |             |             |
| MFSD11      | MFSD11   | 8429.259903 | 6397.403103 | 6390.409641 |             |
| 6535.785231 |          |             |             |             |             |
| NCR2        | NCR2     | 7.291747321 | 0           | 12.2656615  | 0.980760089 |
| PLEK        | PLEK     | 880.2180694 | 372.382209  | 987.9432807 |             |
| 379.5541543 |          |             |             |             |             |
| SLC2A1      | SLC2A1   | 7287.580608 | 5720.424572 | 3958.463484 |             |
| 6398.478818 |          |             |             |             |             |
| OR4D1       | OR4D1    | 0           | 0.880336191 | 0           | 1.961520177 |
| OR2B6       | OR2B6    | 4.166712755 | 1.760672383 | 1.115060136 |             |
| 0.980760089 |          |             |             |             |             |
| SLC38A2     | SLC38A2  | 9769.899732 | 15699.0353  | 15537.24794 |             |
| 13535.46998 |          |             |             |             |             |
| IL5         | IL5      | 647.9238334 | 3.521344766 | 385.8108071 |             |
| 5.884560532 |          |             |             |             |             |
| SLC7A4      | SLC7A4   | 8.33342551  | 2.641008574 | 1.115060136 |             |
| 0.980760089 |          |             |             |             |             |
| FCGRT       | FCGRT    | 119.7929917 | 355.6558213 | 476.1306782 |             |
| 704.1857437 |          |             |             |             |             |
| FOXH1       | FOXH1    | 14.58349464 | 37.85445623 | 20.07108245 |             |
| 35.30736319 |          |             |             |             |             |
| DDX39A      | DDX39A   | 25625.28344 | 17872.58536 | 21098.05284 |             |
| 18207.81105 |          |             |             |             |             |
| KLHDC2      | KLHDC2   | 3826.083987 | 2938.562207 | 4355.424892 |             |
| 3718.061496 |          |             |             |             |             |
| FEM1A       | FEM1A    | 5181.307311 | 4064.512196 | 4995.46941  |             |
| 4181.961018 |          |             |             |             |             |
| VASH1       | VASH1    | 95.83439336 | 124.127403  | 238.6228692 |             |
| 239.3054616 |          |             |             |             |             |
| EP400       | EP400    | 247.9194089 | 706.0296255 | 454.9445356 |             |
| 422.7075982 |          |             |             |             |             |
| KRT73       | KRT73    | 5.208390943 | 0.880336191 | 24.531323   |             |
| 23.53824213 |          |             |             |             |             |
| IFNL1       | IFNL1    | 7.291747321 | 1.760672383 | 0           | 6.865320621 |
| MKRN1       | MKRN1    | 7493.832889 | 6923.844146 | 14656.35043 |             |



|             |            |             |             |             |             |
|-------------|------------|-------------|-------------|-------------|-------------|
| 9817.408488 |            |             |             |             |             |
| VWA2        | VWA2       | 1.041678189 | 3.521344766 | 0           | 0.980760089 |
| CCL28       | CCL28      | 188.5437522 | 296.6732965 | 258.6939516 |             |
| 272.6513047 |            |             |             |             |             |
| SCYL3       | SCYL3      | 1709.393908 | 1456.956397 | 1970.311261 |             |
| 1708.484074 |            |             |             |             |             |
| PHYKPL      | PHYKPL     | 2061.481135 | 1905.047518 | 1940.204637 |             |
| 1989.96222  |            |             |             |             |             |
| ZNF709      | ZNF709     | 178.1269703 | 178.7082469 | 448.2541748 |             |
| 313.8432284 |            |             |             |             |             |
| MON1A       | MON1A      | 1438.557579 | 929.6350182 | 1110.599896 |             |
| 967.0294474 |            |             |             |             |             |
| TBRG4       | TBRG4      | 10391.78161 | 7422.11443  | 8894.834707 |             |
| 10091.04055 |            |             |             |             |             |
| MCM3AP-AS1  | MCM3AP-AS1 |             | 866.676253  | 1271.20546  |             |
| 1171.928203 | 972.914008 |             |             |             |             |
| PLOD2       | PLOD2      | 12.50013826 | 10.5640343  | 0           | 50.99952461 |
| ZBED6CL     | ZBED6CL    | 1310.431161 | 1695.527505 | 776.0818548 |             |
| 1085.701418 |            |             |             |             |             |
| KLHDC7B     | KLHDC7B    | 215.6273851 | 507.0736463 | 656.7704203 |             |
| 592.3790936 |            |             |             |             |             |
| KANSL1L     | KANSL1L    | 733.3414448 | 810.7896323 | 665.6909014 |             |
| 842.4729162 |            |             |             |             |             |
| TFCP2L1     | TFCP2L1    | 1.041678189 | 3.521344766 | 1.115060136 |             |
| 2.942280266 |            |             |             |             |             |
| FAM19A2     | FAM19A2    | 4.166712755 | 5.282017149 | 28.99156354 |             |
| 4.903800443 |            |             |             |             |             |
| LCN12       | LCN12      | 0           | 0.880336191 | 0           | 0.980760089 |
| RNF180      | RNF180     | 4.166712755 | 0           | 6.690360818 | 4.903800443 |
| MBLAC1      | MBLAC1     | 162.5017974 | 138.2127821 | 211.8614259 |             |
| 93.17220842 |            |             |             |             |             |
| MGAT2       | MGAT2      | 6543.822381 | 5248.564373 | 6204.194598 |             |
| 4554.649852 |            |             |             |             |             |
| CUL7        | CUL7       | 836.4675855 | 1292.333529 | 1180.848684 |             |
| 1733.983837 |            |             |             |             |             |
| CLCN7       | CLCN7      | 2577.111839 | 2542.410921 | 3399.818355 |             |
| 3057.029196 |            |             |             |             |             |
| SEC31A      | SEC31A     | 11202.20724 | 8089.409263 | 13521.21921 |             |
| 10842.30278 |            |             |             |             |             |
| JUP         | JUP        | 61.45901313 | 155.8195059 | 26.76144327 |             |
| 13.73064124 |            |             |             |             |             |
| PPCS        | PPCS       | 2926.074032 | 2997.544732 | 3183.496689 |             |
| 3548.390001 |            |             |             |             |             |
| IQCE        | IQCE       | 746.8832613 | 722.7560132 | 331.1728605 |             |
| 421.7268381 |            |             |             |             |             |
| SAP30L      | SAP30L     | 1064.595109 | 1157.642092 | 1106.139655 |             |
| 1099.432059 |            |             |             |             |             |
| TNNI3       | TNNI3      | 0           | 3.345180409 | 0           |             |
| STS         | STS        | 490.6304269 | 312.519348  | 573.14091   |             |
| 280.4973854 |            |             |             |             |             |

|             |             |             |             |             |
|-------------|-------------|-------------|-------------|-------------|
| WASF1       | WASF1       | 37.50041479 | 61.6235334  | 69.13372845 |
| 172.6137756 |             |             |             |             |
| ATP50       | ATP50       | 15016.83277 | 14279.93336 | 9906.194251 |
| 10099.86739 |             |             |             |             |
| TTC1        | TTC1        | 6203.193614 | 4731.807029 | 5855.180776 |
| 5208.816831 |             |             |             |             |
| AGAP9       | AGAP9       | 5.208390943 | 14.96571525 | 16.72590204 |
| 19.61520177 |             |             |             |             |
| RAB9A       | RAB9A       | 939.5937262 | 775.5761847 | 1468.534199 |
| 1283.814956 |             |             |             |             |
| SOX6        | SOX6        | 1.041678189 | 0           | 1.115060136 |
| VTRNA1-1    | VTRNA1-1    | 8.92048109  | 6.250069132 | 0.980760089 |
| 8.92048109  | 8.826840798 |             |             | 9.683698106 |
| PLEKHG4B    | PLEKHG4B    | 2.942280266 | 0           | 0.880336191 |
| 2.942280266 |             |             |             | 0           |
| EFCAB11     | EFCAB11     | 425.004701  | 353.0148128 | 247.5433503 |
| 444.2843202 |             |             |             |             |
| CCDC117     | CCDC117     | 4207.338204 | 5182.539159 | 3879.294214 |
| 4058.385247 |             |             |             |             |
| ASCC3       | ASCC3       | 4721.927229 | 5225.675632 | 5282.039865 |
| 4156.461256 |             |             |             |             |
| MRAP        | MRAP        | 114.5846008 | 137.3324459 | 167.2590204 |
| 155.9408541 |             |             |             |             |
| LIPH        | LIPH        | 0           | 8.92048109  | 0           |
| ZNF513      | ZNF513      | 600.0066367 | 546.6887749 | 413.6873106 |
| 550.2064097 |             |             |             |             |
| TBC1D20     | TBC1D20     | 2817.7395   | 2831.161192 | 2931.493098 |
| 2551.937751 |             |             |             |             |
| GNB3        | GNB3        | 67.70908227 | 95.07630868 | 74.70902913 |
| 59.82636541 |             |             |             |             |
| ANKS6       | ANKS6       | 119.7929917 | 235.0497631 | 569.7957296 |
| 749.3007077 |             |             |             |             |
| OSCAR       | OSCAR       | 4.166712755 | 2.641008574 | 5.575300681 |
| 15.69216142 |             |             |             |             |
| KIRREL2     | KIRREL2     | 22.91692015 | 90.67462772 | 8.92048109  |
| 38.24964346 |             |             |             |             |
| CEMP1       | CEMP1       | 242.711018  | 285.228926  | 237.507809  |
| 310.9009481 |             |             |             |             |
| FGFBP3      | FGFBP3      | 46.87551849 | 66.02521436 | 82.51445008 |
| 80.42232727 |             |             |             |             |
| AMER1       | AMER1       | 9.375103698 | 9.683698106 | 5.575300681 |
| 13.73064124 |             |             |             |             |
| APOBEC3A    | APOBEC3A    | 1.961520177 | 0           | 0           |
| 1.961520177 |             |             |             | 5.575300681 |
| SKP2        | SKP2        | 2982.324654 | 2430.608225 | 1929.054036 |
| 2508.784307 |             |             |             |             |
| PLD2        | PLD2        | 365.6290442 | 437.5270871 | 361.2794842 |
| 528.6296878 |             |             |             |             |
| ZNF160      | ZNF160      | 1057.303362 | 1471.922112 | 3050.804533 |
| 2699.051764 |             |             |             |             |

|              |              |             |             |             |
|--------------|--------------|-------------|-------------|-------------|
| NXT1         | NXT1         | 3581.289613 | 2530.086214 | 3584.918338 |
| 3479.736795  |              |             |             |             |
| COTL1        | COTL1        | 52844.33451 | 63563.79437 | 24166.69833 |
| 43879.20637  |              |             |             |             |
| IL22RA1      | IL22RA1      | 0           | 1.760672383 | 0           |
| 5.884560532  |              |             |             |             |
| GPBP1L1      | GPBP1L1      | 4665.676607 | 6239.822925 | 7964.874553 |
| 6702.514446  |              |             |             |             |
| LGR6         | LGR6         | 1.041678189 | 0.880336191 | 17.84096218 |
| 6.865320621  |              |             |             |             |
| CEACAM8      | CEACAM8      | 0           | 0.880336191 | 3.345180409 |
| 0            |              |             |             |             |
| PTPN9        | PTPN9        | 4758.385966 | 3384.01232  | 3141.124404 |
| 3027.606394  |              |             |             |             |
| IRF7         | IRF7         | 5401.101408 | 2927.117837 | 8126.558273 |
| 3917.155794  |              |             |             |             |
| SEMA4F       | SEMA4F       | 541.6726581 | 628.5600407 | 885.3577482 |
| 989.5869295  |              |             |             |             |
| DSTYK        | DSTYK        | 1908.354442 | 1964.030043 | 2082.932335 |
| 2867.742499  |              |             |             |             |
| PDZD4        | PDZD4        | 0           | 0.880336191 | 1.115060136 |
| 0.980760089  |              |             |             |             |
| GGPS1        | GGPS1        | 1840.645359 | 1789.723477 | 2644.922643 |
| 2408.746778  |              |             |             |             |
| ZNF28        | ZNF28        | 1630.226365 | 1735.142633 | 1951.355238 |
| 1580.004503  |              |             |             |             |
| C12orf29     | C12orf29     |             | 1844.812072 | 1358.358743 |
| 2186.632927  | 1931.116615  |             |             |             |
| SLC10A5      | SLC10A5      | 1.041678189 | 0           | 0           |
| 0            |              |             |             |             |
| AIDA         | AIDA         | 1151.054399 | 2056.465343 | 1568.889612 |
| 1235.757712  |              |             |             |             |
| SNAR-E       | SNAR-E       | 0           | 0           | 1.115060136 |
| 0            |              |             |             |             |
| LOC100862671 | LOC100862671 |             | 27.08363291 | 43.13647338 |
| 76.9391494   | 42.17268381  |             |             |             |
| TPSB2        | TPSB2        | 2.083356377 | 0           | 0           |
| 0            |              |             |             |             |
| TADA3        | TADA3        | 7424.040451 | 7726.710752 | 4309.707427 |
| 5764.907801  |              |             |             |             |
| ANAPC11      | ANAPC11      | 7707.376918 | 7354.328543 | 5847.375355 |
| 5527.56386   |              |             |             |             |
| SNORD116-10  | SNORD116-10  |             | 0           | 0           |
| 0            |              |             |             | 1.961520177 |
| UBE2K        | UBE2K        | 3410.45439  | 3631.38679  | 3049.689473 |
| 2773.589531  |              |             |             |             |
| ZDBF2        | ZDBF2        | 297.919962  | 423.4417081 | 624.4336763 |
| 551.1871698  |              |             |             |             |
| PPP1R15A     | PPP1R15A     |             | 2826.072926 | 1491.289508 |
| 5904.243422  | 2805.954614  |             |             |             |
| MRPL23       | MRPL23       | 3200.035396 | 3001.066077 | 1878.87633  |
| 2269.478845  |              |             |             |             |
| PMAIP1       | PMAIP1       | 7461.540866 | 4311.886666 | 9634.119577 |
| 5390.257447  |              |             |             |             |
| SMIM20       | SMIM20       | 921.885197  | 668.1751693 | 1105.024595 |
| 771.8581898  |              |             |             |             |
| DFFA         | DFFA         | 4447.965866 | 3225.551805 | 3170.115967 |

|             |          |             |             |             |
|-------------|----------|-------------|-------------|-------------|
| 3501.313517 |          |             |             |             |
| CYP8B1      | CYP8B1   | 0           | 0           | 0           |
| 0.980760089 |          |             |             |             |
| PPP3R1      | PPP3R1   | 363.5456879 | 1012.38662  | 366.8547848 |
| 496.2646049 |          |             |             |             |
| RNF8        | RNF8     | 2016.688973 | 1663.835402 | 1614.607077 |
| 1815.386924 |          |             |             |             |
| KIF22       | KIF22    | 15065.79164 | 13300.99952 | 9151.298538 |
| 11371.91323 |          |             |             |             |
| OST4        | OST4     | 9534.480461 | 10290.24974 | 9614.048495 |
| 9010.242935 |          |             |             |             |
| NCOA4       | NCOA4    | 20152.30624 | 15823.1627  | 20187.04871 |
| 16341.4246  |          |             |             |             |
| HMGB3       | HMGB3    | 3496.913679 | 3881.402268 | 1082.723392 |
| 1629.042507 |          |             |             |             |
| UQCC1       | UQCC1    | 4208.379882 | 2566.179998 | 3267.126199 |
| 2927.568865 |          |             |             |             |
| CCDC101     | CCDC101  | 1183.346422 | 801.1059342 | 1137.361339 |
| 949.3757658 |          |             |             |             |
| PPM1K       | PPM1K    | 2993.783114 | 2369.865027 | 6215.3452   |
| 3140.393804 |          |             |             |             |
| IGSF11      | IGSF11   | 0           | 2.641008574 | 15.61084191 |
| 23.53824213 |          |             |             |             |
| DUSP18      | DUSP18   | 1040.636511 | 840.7210628 | 732.5945095 |
| 897.3954811 |          |             |             |             |
| APBB1       | APBB1    | 1763.561173 | 2428.847552 | 3988.570107 |
| 4328.094271 |          |             |             |             |
| APAF1       | APAF1    | 1704.185517 | 2796.82808  | 1417.241433 |
| 1567.254622 |          |             |             |             |
| PPP1R12B    | PPP1R12B |             | 443.7549084 | 592.4662568 |
| 502.8921215 |          |             |             |             |
| GCLC        | GCLC     | 581.5907326 |             |             |
| 2260.441669 |          |             |             |             |
| 1728.98028  |          |             |             |             |
| 1479.966974 |          |             |             |             |
| FJX1        | FJX1     | 5.208390943 | 39.61512861 | 6.690360818 |
| 14.71140133 |          |             |             |             |
| FKBP3       | FKBP3    | 6171.943268 | 6687.914046 | 3623.945443 |
| 5145.067425 |          |             |             |             |
| CHML        | CHML     | 619.7985223 | 1183.171841 | 1093.873994 |
| 973.894768  |          |             |             |             |
| NT5E        | NT5E     | 156.2517283 | 447.2107853 | 432.6433329 |
| 812.0693534 |          |             |             |             |
| LIMK2       | LIMK2    | 4633.384583 | 4783.746864 | 2441.981698 |
| 4144.692135 |          |             |             |             |
| UCP2        | UCP2     | 25984.66242 | 23017.27006 | 15306.43049 |
| 25991.12311 |          |             |             |             |
| SERINC5     | SERINC5  | 779.1752851 | 1544.990016 | 1515.366725 |
| 817.9539139 |          |             |             |             |
| PTPN13      | PTPN13   | 185.4187176 | 1321.384623 | 147.187938  |
| 707.1280239 |          |             |             |             |
| NSUN4       | NSUN4    | 1554.183858 | 1397.973872 | 2076.241974 |
| 1981.135379 |          |             |             |             |
| ELOVL3      | ELOVL3   | 7.291747321 | 6.16235334  | 22.30120273 |

|             |             |             |             |             |             |
|-------------|-------------|-------------|-------------|-------------|-------------|
| 12.74988115 |             |             |             |             |             |
| LPAR6       | LPAR6       | 1081.26196  | 654.9701264 | 932.1902739 |             |
| 619.840376  |             |             |             |             |             |
| TNK2        | TNK2        | 164.5851538 | 375.0232176 | 274.3047935 |             |
| 169.6714953 |             |             |             |             |             |
| WFS1        | WFS1        | 464.5884722 | 276.4255641 | 409.22707   |             |
| 350.1313517 |             |             |             |             |             |
| SNORA70     | SNORA70     | 326.0452731 | 185.7509364 | 237.507809  |             |
| 324.6315893 |             |             |             |             |             |
| TET2        | TET2        | 2652.112668 | 2522.163188 | 1759.564895 |             |
| 2317.53609  |             |             |             |             |             |
| ITLN1       | ITLN1       | 0           | 1.760672383 | 0           | 1.961520177 |
| SOWAHC      | SOWAHC      | 0           | 13.20504287 | 56.86806695 | 91.21068825 |
| AGAP11      | AGAP11      | 3.125034566 | 0           | 5.575300681 | 0           |
| FAM228A     | FAM228A     | 2.083356377 | 4.401680957 | 5.575300681 |             |
| 7.846080709 |             |             |             |             |             |
| BAG5        | BAG5        | 3824.000631 | 3703.574357 | 4294.096585 |             |
| 4035.827765 |             |             |             |             |             |
| DOK1        | DOK1        | 3951.08537  | 3367.285932 | 1931.284156 |             |
| 2338.132051 |             |             |             |             |             |
| ASPDH       | ASPDH       | 0           | 0           | 1.115060136 | 0           |
| XRCC1       | XRCC1       | 1841.687038 | 2810.913459 | 1605.686596 |             |
| 2463.669343 |             |             |             |             |             |
| KCP         | KCP         | 1.041678189 | 3.521344766 | 7.805420954 |             |
| 5.884560532 |             |             |             |             |             |
| CXorf22     | CXorf22     | 3.125034566 | 0           | 0           | 3.923040355 |
| GABPB1-AS1  | GABPB1-AS1  |             | 1256.263896 | 1530.024301 |             |
| 1119.520377 |             | 1383.852485 |             |             |             |
| LRRC59      | LRRC59      | 5928.190572 | 9455.691032 | 4391.106817 |             |
| 4385.959117 |             |             |             |             |             |
| PAN3        | PAN3        | 540.6309799 | 1069.608473 | 768.2764339 |             |
| 694.3781428 |             |             |             |             |             |
| KHDC3L      | KHDC3L      | 0           | 1.760672383 | 0           | 0           |
| TAF9        | TAF9        | 9090.725553 | 7666.847891 | 7816.571555 |             |
| 7737.21634  |             |             |             |             |             |
| AK6         | AK6         | 6155.276417 | 4714.200305 | 6094.918705 |             |
| 5464.795214 |             |             |             |             |             |
| ZNF585A     | ZNF585A     | 451.0466557 | 374.1428814 | 1244.407112 |             |
| 748.3199477 |             |             |             |             |             |
| ATP5J       | ATP5J       | 10834.49484 | 10336.02722 | 8155.549837 |             |
| 8563.016334 |             |             |             |             |             |
| KIF2A       | KIF2A       | 10650.1178  | 10020.86687 | 10418.00685 |             |
| 9556.526304 |             |             |             |             |             |
| PPP1R14A    | PPP1R14A    |             | 7.291747321 | 0           | 16.72590204 |
| 0           |             |             |             |             |             |
| FXVD6-FXVD2 | FXVD6-FXVD2 |             | 17.70852921 | 25.52974955 |             |
| 52.4078264  |             | 107.8836098 |             |             |             |
| ETV7        | ETV7        | 894.8015641 | 353.895149  | 1160.777602 |             |
| 263.8244639 |             |             |             |             |             |
| SLC25A26    | SLC25A26    |             | 1685.435309 | 1032.634353 |             |

|                     |             |             |             |             |
|---------------------|-------------|-------------|-------------|-------------|
| 1883.33657          | 1775.17576  |             |             |             |
| RAB40AL RAB40AL     | 3.125034566 | 0           | 0           | 0           |
| GP1R1 GP1R1         | 12.50013826 | 9.683698106 | 0           | 0           |
| SYNE4 SYNE4         | 36.4587366  | 51.93983529 | 43.48734531 |             |
| 37.26888337         |             |             |             |             |
| ARL2 ARL2           | 1835.436968 | 1875.996424 | 2400.724473 |             |
| 3082.528959         |             |             |             |             |
| TDGF1 TDGF1         | 0           | 0           | 3.345180409 | 1.961520177 |
| LUC7L2 LUC7L2       | 10310.53071 | 10017.34552 | 10419.12191 |             |
| 10081.23295         |             |             |             |             |
| HOXB2 HOXB2         | 552.08944   | 737.7217284 | 611.0529547 |             |
| 808.1463131         |             |             |             |             |
| CDC25A CDC25A       | 2386.48473  | 3285.414666 | 2081.817274 |             |
| 2014.481222         |             |             |             |             |
| BRI3 BRI3           | 94.79271517 | 285.228926  | 297.7210564 |             |
| 155.9408541         |             |             |             |             |
| SETD1A SETD1A       | 221.8774542 | 441.0484319 | 285.4553949 |             |
| 238.3247015         |             |             |             |             |
| DCTD DCTD           | 5017.763835 | 4627.047022 | 4383.301396 |             |
| 5753.13868          |             |             |             |             |
| ARHGAP11B ARHGAP11B | 402.5367092 | 458.9957215 | 939.5937262 | 723.6363494 |
| 18.63444168         |             |             |             |             |
| TPM2 TPM2           | 8.33342551  | 14.96571525 | 10.03554123 |             |
| 1766.34892          |             |             |             |             |
| AC0T8 AC0T8         | 2056.272744 | 1957.86769  | 1311.31072  |             |
| 3517.986438         |             |             |             |             |
| MED6 MED6           | 4418.798876 | 3266.927606 | 3636.211104 |             |
| 4443.823962         |             |             |             |             |
| HTATIP2 HTATIP2     | 4737.552402 | 3685.967634 | 5224.056738 |             |
| 26.04195472         |             |             |             |             |
| SHISA9 SHISA9       | 22270.038   | 11.44437049 | 0           | 10.78836098 |
| 7-Sep 7-Sep         |             | 17458.82735 | 19234.78735 |             |
| 19707.39322         |             |             |             |             |
| SPATA45 SPATA45     | 17.70852921 | 7.042689532 | 22.30120273 |             |
| 9.807600887         |             |             |             |             |
| CYB5RL CYB5RL       | 713.5495593 | 710.4313065 | 488.3963397 |             |
| 745.3776674         |             |             |             |             |
| RFX5 RFX5           | 8078.214353 | 7728.471425 | 5747.019942 |             |
| 6438.689982         |             |             |             |             |
| KIAA0825 KIAA0825   | 27.87650341 | 50.99952461 | 120.8346699 | 82.751602   |
| 261.4612254         |             |             |             |             |
| C2CD4D C2CD4D       | 261.4612254 | 319.5620375 | 278.7650341 |             |
| 407.9961969         |             |             |             |             |
| MEF2A MEF2A         | 1716.685655 | 2073.191731 | 2569.098554 |             |
| 1604.523505         |             |             |             |             |
| LIMS2 LIMS2         | 628.1319478 | 587.1842397 | 278.7650341 |             |
| 430.5536789         |             |             |             |             |
| SEC14L4 SEC14L4     | 0           | 0.880336191 | 0           | 0           |
| SLC1A5 SLC1A5       | 15237.66854 | 11895.10262 | 13200.08189 |             |
| 10421.5567          |             |             |             |             |

|                 |              |             |             |
|-----------------|--------------|-------------|-------------|
| PDHX PDHX       | 3487.538576  | 2576.744032 | 2857.899129 |
| 2664.725161     |              |             |             |
| LOC102723859    | LOC102723859 | 42.70880574 | 54.58084387 |
| 51.29276627     | 65.71092594  |             |             |
| ATP6V1E1        | ATP6V1E1     | 7172.996007 | 5837.509285 |
| 6944.594529     | 5908.098774  |             |             |
| FKBP14 FKBP14   | 216.6690632  | 128.529084  | 267.6144327 |
| 144.171733      |              |             |             |
| LAX1 LAX1       | 2658.362738  | 1894.483484 | 2809.951543 |
| 2145.903074     |              |             |             |
| C17orf80        | C17orf80     | 2454.193813 | 1937.619957 |
| 1819.778142     | 1740.849157  |             |             |
| PSTPIP2 PSTPIP2 | 1194.804882  | 706.9099617 | 1828.698623 |
| 1578.042983     |              |             |             |
| TRNAU1AP        | TRNAU1AP     | 2581.278552 | 2200.840479 |
| 1979.231742     | 2042.923265  |             |             |
| SPATS2L SPATS2L | 3487.538576  | 3231.714159 | 3254.860538 |
| 3659.215891     |              |             |             |
| RAB20 RAB20     | 32.29202385  | 34.33311147 | 234.1626286 |
| 143.1909729     |              |             |             |
| RBM15 RBM15     | 1842.728716  | 1967.551388 | 1756.219715 |
| 1876.19405      |              |             |             |
| LOC101927583    | LOC101927583 | 0           | 0.880336191 |
| 0.980760089     |              |             | 0           |
| EIF4G2 EIF4G2   | 99262.55628  | 97403.03723 | 90993.36736 |
| 83607.83604     |              |             |             |
| CCBL1 CCBL1     | 644.7987988  | 826.6356838 | 230.8174482 |
| 586.494533      |              |             |             |
| LOC101929718    | LOC101929718 | 1634.393078 | 1414.70026  |
| 1268.938435     | 1569.216142  |             |             |
| SP110 SP110     | 4859.42875   | 3928.060086 | 8675.16786  |
| 4720.398307     |              |             |             |
| SNORA34 SNORA34 | 4.166712755  | 5.282017149 | 2.230120273 |
| 5.884560532     |              |             |             |
| SNORA31 SNORA31 | 81.25089872  | 58.10218863 | 108.1608332 |
| 70.61472638     |              |             |             |
| SNORA29 SNORA29 | 18.7502074   | 34.33311147 | 49.062646   |
| 35.30736319     |              |             |             |
| SNORA69 SNORA69 | 3.125034566  | 1.760672383 | 1.115060136 |
| 2.942280266     |              |             |             |
| ZNF639 ZNF639   | 1508.350017  | 1627.741618 | 2111.923898 |
| 1985.058419     |              |             |             |
| ATL1 ATL1       | 162.5017974  | 189.2722812 | 179.5246819 |
| 170.6522554     |              |             |             |
| KCTD21 KCTD21   | 639.5904079  | 391.7496052 | 675.7264426 |
| 600.2251743     |              |             |             |
| CLEC1B CLEC1B   | 0            | 1.760672383 | 0           |
| ECD ECD         | 4429.215658  | 3782.804615 | 3956.233363 |
| 4302.594509     |              |             |             |
| ITIH4 ITIH4     | 88.54264604  | 101.238662  | 65.78854804 |

|             |           |             |             |             |             |
|-------------|-----------|-------------|-------------|-------------|-------------|
| 104.9413295 |           |             |             |             |             |
| BUD13       | BUD13     | 2726.07182  | 2581.145713 | 2969.405143 |             |
| 2123.345592 |           |             |             |             |             |
| HPCA        | HPCA      | 4.166712755 | 2.641008574 | 10.03554123 |             |
| 6.865320621 |           |             |             |             |             |
| HOXA4       | HOXA4     | 0           | 0           | 4.460240545 | 0.980760089 |
| VDAC2       | VDAC2     | 13818.90285 | 10253.27562 | 10852.88031 |             |
| 10587.30516 |           |             |             |             |             |
| ASCL4       | ASCL4     | 2.083356377 | 0           | 0           | 0           |
| BACE2       | BACE2     | 19.79188559 | 22.00840479 | 21.18614259 |             |
| 34.3266031  |           |             |             |             |             |
| LRRC14      | LRRC14    | 2817.7395   | 2493.112094 | 2863.47443  |             |
| 2803.012333 |           |             |             |             |             |
| LRWD1       | LRWD1     | 2602.112115 | 2137.456273 | 2135.340161 |             |
| 2094.903549 |           |             |             |             |             |
| CEP41       | CEP41     | 1456.266108 | 1880.398105 | 1222.105909 |             |
| 1798.714003 |           |             |             |             |             |
| TGM5        | TGM5      | 12.50013826 | 0           | 22.30120273 | 10.78836098 |
| HSPB11      | HSPB11    | 3486.496898 | 3531.028464 | 2657.188305 |             |
| 2977.587629 |           |             |             |             |             |
| PLAC8L1     | PLAC8L1   | 2.083356377 | 3.521344766 | 4.460240545 |             |
| 1.961520177 |           |             |             |             |             |
| PTPN4       | PTPN4     | 2390.651443 | 1634.784308 | 2394.034113 |             |
| 1489.774575 |           |             |             |             |             |
| GCC1        | GCC1      | 2444.818709 | 2748.40959  | 3107.6726   |             |
| 2911.876703 |           |             |             |             |             |
| C1orf123    | C1orf123  |             | 2180.232449 | 1850.466674 |             |
| 2114.154018 |           | 1939.943455 |             |             |             |
| ULK4        | ULK4      | 713.5495593 | 293.1519517 | 519.6180235 |             |
| 397.2078359 |           |             |             |             |             |
| C9orf173    | C9orf173  |             | 0           | 2.641008574 | 0           |
| MICB        | MICB      | 168.7518666 | 184.8706002 | 114.851194  | 0           |
| 108.8643698 |           |             |             |             |             |
| RPS4Y2      | RPS4Y2    | 0           | 53.70050768 | 0           | 20.59596186 |
| FBF1        | FBF1      | 352.0872278 | 503.5523015 | 438.2186336 |             |
| 655.1477392 |           |             |             |             |             |
| CATSPER1    | CATSPER1  |             | 7.291747321 | 2.641008574 |             |
| 1.115060136 |           | 13.73064124 |             |             |             |
| PCGF1       | PCGF1     | 1082.303638 | 857.4474505 | 1026.970386 |             |
| 791.4733916 |           |             |             |             |             |
| KNTC1       | KNTC1     | 3057.325484 | 6098.088798 | 2012.683546 |             |
| 3424.81423  |           |             |             |             |             |
| WDR48       | WDR48     | 6308.403111 | 5642.954987 | 7228.934863 |             |
| 6557.361953 |           |             |             |             |             |
| CBX2        | CBX2      | 118.7513135 | 450.73213   | 263.1541922 |             |
| 246.1707823 |           |             |             |             |             |
| LINC00176   | LINC00176 |             | 110.417888  | 158.4605145 |             |
| 59.09818722 |           | 50.01876452 |             |             |             |
| CNNM4       | CNNM4     | 848.9677238 | 1461.358078 | 845.2155833 |             |
| 1127.874102 |           |             |             |             |             |



|                 |             |             |             |
|-----------------|-------------|-------------|-------------|
| MYCBP MYCBP     | 7117.787063 | 5838.389622 | 5511.742254 |
| 5760.984761     |             |             |             |
| PCY0X1 PCY0X1   | 1442.724291 | 1342.512692 | 2178.827506 |
| 2397.958417     |             |             |             |
| MMD MMD         | 1642.726504 | 1130.35167  | 1316.886021 |
| 955.2603264     |             |             |             |
| PIGN PIGN       | 3256.286018 | 3062.68961  | 2479.893743 |
| 3114.894042     |             |             |             |
| B4GALT3 B4GALT3 | 5730.271716 | 3810.975373 | 5519.547675 |
| 4542.880731     |             |             |             |
| AK3 AK3         | 3196.910361 | 3503.738042 | 2807.721423 |
| 3068.798317     |             |             |             |
| RPL21 RPL21     | 27221.13443 | 26889.86897 | 45047.31444 |
| 33644.97484     |             |             |             |
| ARHGFEF39       | ARHGFEF39   | 2543.778137 | 2546.812602 |
| 1787.441398     | 2655.89832  |             |             |
| BTBD7 BTBD7     | 714.5912374 | 576.6202054 | 1059.307129 |
| 614.9365756     |             |             |             |
| AMBRA1 AMBRA1   | 1395.848773 | 1622.459601 | 1872.185969 |
| 1655.52303      |             |             |             |
| TRIM61 TRIM61   | 78.12586415 | 143.4947992 | 126.0017954 |
| 155.9408541     |             |             |             |
| FOXK1 FOXK1     | 559.3811873 | 795.8239171 | 1105.024595 |
| 906.2223219     |             |             |             |
| ZNF611 ZNF611   | 1651.059929 | 1752.749357 | 2178.827506 |
| 1773.21424      |             |             |             |
| FAM229B FAM229B | 173.9602575 | 198.0756431 | 328.9427402 |
| 208.9018989     |             |             |             |
| RCHY1 RCHY1     | 2153.148816 | 1745.706668 | 1751.759474 |
| 1843.828967     |             |             |             |
| EIF1AX EIF1AX   | 6462.571483 | 3021.313809 | 7003.692716 |
| 3983.84748      |             |             |             |
| PLS1 PLS1       | 430.2130919 | 737.7217284 | 441.563814  |
| 591.3983335     |             |             |             |
| EXT1 EXT1       | 1319.806265 | 1022.070318 | 1009.129423 |
| 1061.182416     |             |             |             |
| MXRA8 MXRA8     | 15.62517283 | 6.16235334  | 7.805420954 |
| 1.961520177     |             |             |             |
| RIBC1 RIBC1     | 70.83411683 | 42.25613719 | 61.32830749 |
| 72.57624656     |             |             |             |
| UNC45B UNC45B   | 17.70852921 | 23.76907717 | 27.87650341 |
| 8.826840798     |             |             |             |
| PRIMA1 PRIMA1   | 4.166712755 | 0 0         | 0           |
| SLC9A6 SLC9A6   | 1386.473669 | 1964.030043 | 1762.910075 |
| 1676.118992     |             |             |             |
| C19orf54        | C19orf54    | 896.8849205 | 1042.318051 |
| 464.9800768     | 710.0703042 |             |             |
| ARHGAP12        | ARHGAP12    | 483.3386796 | 785.2598828 |
| 947.8011158     | 808.1463131 |             |             |
| GPR157 GPR157   | 119.7929917 | 66.02521436 | 69.13372845 |

|                 |               |               |             |  |
|-----------------|---------------|---------------|-------------|--|
| 87.28764789     |               |               |             |  |
| TYW1 TYW1       | 2072.939596   | 1439.349673   | 2007.108245 |  |
| 1886.001651     |               |               |             |  |
| T0E1 T0E1       | 3415.662781   | 2358.420657   | 3359.676191 |  |
| 3112.932521     |               |               |             |  |
| HSD11B1 HSD11B1 | 273.9613636   | 164.6228678   | 65.78854804 |  |
| 160.8446545     |               |               |             |  |
| AKT3 AKT3       | 870.8429658   | 352.1344766   | 889.8179887 |  |
| 325.6123494     |               |               |             |  |
| LOC101928861    | LOC101928861  | 12.50013826   | 5.282017149 |  |
| 8.92048109      | 22.55748204   |               |             |  |
| FAIM FAIM       | 291.6698928   | 400.5529671   | 361.2794842 |  |
| 413.8807574     |               |               |             |  |
| MS4A2 MS4A2     | 0 0           | 0 0.980760089 |             |  |
| URGCP URGCP     | 2508.361078   | 2212.284849   | 2914.767196 |  |
| 2832.435136     |               |               |             |  |
| PPT1 PPT1       | 20089.80555   | 16727.26797   | 17968.07904 |  |
| 18737.42149     |               |               |             |  |
| SUFU SUFU       | 782.3003197   | 1404.136225   | 807.3035387 |  |
| 824.8192346     |               |               |             |  |
| NUP210 NUP210   | 11429.29309   | 26774.54493   | 13011.63673 |  |
| 18436.32815     |               |               |             |  |
| LSR LSR         | 356.2539405   | 270.2632108   | 2317.094963 |  |
| 2636.283118     |               |               |             |  |
| TCF7L1 TCF7L1   | 6.250069132   | 3.521344766   | 5.575300681 |  |
| 4.903800443     |               |               |             |  |
| PSME1 PSME1     | 32261.81518   | 24662.6184    | 37896.43379 |  |
| 31060.67201     |               |               |             |  |
| SPEM1 SPEM1     | 0 0.880336191 | 0             | 0           |  |
| FAM213A FAM213A | 208.3356377   | 447.2107853   | 739.2848703 |  |
| 873.857239      |               |               |             |  |
| SLC22A1 SLC22A1 | 16.66685102   | 4.401680957   | 11.15060136 |  |
| 5.884560532     |               |               |             |  |
| ANKRD7 ANKRD7   | 0 0           | 20.07108245   | 11.76912106 |  |
| GTPBP8 GTPBP8   | 1051.053292   | 1137.394359   | 963.4119577 |  |
| 1197.508068     |               |               |             |  |
| TLR10 TLR10     | 7.291747321   | 0 0           | 0           |  |
| STAT1 STAT1     | 106017.8393   | 69464.68786   | 167348.2253 |  |
| 100804.4834     |               |               |             |  |
| TTC39B TTC39B   | 1023.969659   | 816.9519857   | 1536.552868 |  |
| 1003.317571     |               |               |             |  |
| ACTA2 ACTA2     | 1016.677912   | 817.8323218   | 1904.522713 |  |
| 1477.024694     |               |               |             |  |
| ACP2 ACP2       | 1931.271362   | 2046.781645   | 1403.860712 |  |
| 1666.311391     |               |               |             |  |
| ACADSB ACADSB   | 2476.069055   | 2045.020973   | 2386.228692 |  |
| 2416.592858     |               |               |             |  |
| ACADL ACADL     | 0 0           | 0 2.942280266 |             |  |
| ACAA1 ACAA1     | 6894.867931   | 5208.068909   | 4094.50082  |  |
| 5231.374313     |               |               |             |  |

|             |             |             |             |             |             |
|-------------|-------------|-------------|-------------|-------------|-------------|
| CBFB        | CBFB        | 26298.20755 | 19948.4181  | 15154.78231 |             |
| 13545.27758 |             |             |             |             |             |
| KIF5C       | KIF5C       | 202.0855686 | 389.1085966 | 406.9969497 |             |
| 357.9774324 |             |             |             |             |             |
| OCRL        | OCRL        | 133.3348082 | 71.30723151 | 82.51445008 |             |
| 141.2294528 |             |             |             |             |             |
| CHAD        | CHAD        | 7.291747321 | 14.96571525 | 11.15060136 |             |
| 3.923040355 |             |             |             |             |             |
| THBS3       | THBS3       | 153.1266937 | 242.0924526 | 112.6210738 |             |
| 305.0163876 |             |             |             |             |             |
| LRAT        | LRAT        | 1.041678189 | 0           | 0           | 0           |
| CYP7B1      | CYP7B1      | 31.25034566 | 9.683698106 | 24.531323   |             |
| 3.923040355 |             |             |             |             |             |
| MTA2        | MTA2        | 4027.127878 | 4843.609725 | 3292.772582 |             |
| 2869.704019 |             |             |             |             |             |
| LINC00847   | LINC00847   |             | 997.9277048 | 991.2585516 |             |
| 1415.011313 | 1284.795716 |             |             |             |             |
| CISD3       | CISD3       | 3050.033737 | 2322.326873 | 1679.280565 |             |
| 1914.443693 |             |             |             |             |             |
| NAF1        | NAF1        | 196.8771777 | 262.340185  | 230.8174482 |             |
| 220.67102   |             |             |             |             |             |
| MTSS1L      | MTSS1L      | 0           | 2.641008574 | 0           | 7.846080709 |
| TXNDC5      | TXNDC5      | 11630.33698 | 9191.590175 | 8187.886581 |             |
| 9532.007302 |             |             |             |             |             |
| ELMSAN1     | ELMSAN1     | 1106.262236 | 2403.317803 | 1902.292592 |             |
| 2222.402361 |             |             |             |             |             |
| MT01        | MT01        | 4749.010862 | 3928.060086 | 4179.245391 |             |
| 3773.964821 |             |             |             |             |             |
| LAMA3       | LAMA3       | 0           | 2.641008574 | 21.18614259 | 2.942280266 |
| FBXL5       | FBXL5       | 2564.611701 | 2397.155449 | 5959.996428 |             |
| 4340.844152 |             |             |             |             |             |
| USP34       | USP34       | 1965.646742 | 2872.536993 | 2743.047935 |             |
| 2151.787635 |             |             |             |             |             |
| CAPN10-AS1  | CAPN10-AS1  |             | 71.87579502 | 94.19597248 |             |
| 191.7903434 | 127.4988115 |             |             |             |             |
| SIX3-AS1    | SIX3-AS1    |             | 8.33342551  | 0           | 0           |
| EPN2        | EPN2        | 80.20922053 | 81.8712658  | 112.6210738 | 0           |
| 157.9023743 |             |             |             |             |             |
| RPL7L1      | RPL7L1      | 7381.331645 | 4423.689362 | 6533.137338 |             |
| 5997.347942 |             |             |             |             |             |
| THADA       | THADA       | 3254.202661 | 5093.625204 | 3795.664704 |             |
| 4796.897594 |             |             |             |             |             |
| ZC3HAV1     | ZC3HAV1     | 11700.12942 | 9209.196899 | 14343.01853 |             |
| 8187.38522  |             |             |             |             |             |
| NLRX1       | NLRX1       | 1483.349741 | 1924.414914 | 770.5065542 |             |
| 1643.753909 |             |             |             |             |             |
| SNIP1       | SNIP1       | 966.6773591 | 1029.113008 | 1118.405317 |             |
| 1113.162701 |             |             |             |             |             |
| TTLL7       | TTLL7       | 52.08390943 | 124.127403  | 10.03554123 |             |
| 28.44204257 |             |             |             |             |             |

|             |             |             |             |             |             |
|-------------|-------------|-------------|-------------|-------------|-------------|
| XP04        | XP04        | 2464.610594 | 3437.712828 | 2547.912411 |             |
| 2627.456278 |             |             |             |             |             |
| DOLPP1      | DOLPP1      | 1859.395567 | 1162.924109 | 1520.942026 |             |
| 1235.757712 |             |             |             |             |             |
| POLR2J3     | POLR2J3     | 445.8382648 | 380.3052347 | 448.2541748 |             |
| 356.9966723 |             |             |             |             |             |
| HIST1H3C    | HIST1H3C    |             | 137.5015209 | 496.509612  |             |
| 82.51445008 | 92.19144833 |             |             |             |             |
| HIST1H3A    | HIST1H3A    |             | 44.79216211 | 108.2813515 |             |
| 32.33674395 | 25.49976231 |             |             |             |             |
| HIST1H3D    | HIST1H3D    |             | 464.5884722 | 2842.605562 |             |
| 346.7837024 | 498.226125  |             |             |             |             |
| HIST1H2BC   | HIST1H2BC   |             | 205.2106032 | 177.8279107 |             |
| 113.7361339 | 58.84560532 |             |             |             |             |
| CD52        | CD52        | 24959.65108 | 29011.47919 | 12422.88498 |             |
| 15056.62888 |             |             |             |             |             |
| CPNE6       | CPNE6       | 4.166712755 | 1.760672383 | 1.115060136 |             |
| 0.980760089 |             |             |             |             |             |
| ZBTB47      | ZBTB47      | 0           | 3.521344766 | 5.575300681 | 1.961520177 |
| MAP2K5      | MAP2K5      | 516.6723816 | 677.8588674 | 776.0818548 |             |
| 997.4330102 |             |             |             |             |             |
| ADCY7       | ADCY7       | 5874.023306 | 5746.834658 | 3664.087608 |             |
| 4422.24724  |             |             |             |             |             |
| HLA-DPB2    | HLA-DPB2    |             | 1.041678189 | 0.880336191 | 0           |
| 0           |             |             |             |             |             |
| HLA-DRB6    | HLA-DRB6    |             | 84.37593328 | 109.1616877 |             |
| 17.84096218 | 19.61520177 |             |             |             |             |
| PRSS3P2     | PRSS3P2     | 0           | 6.16235334  | 1.115060136 | 4.903800443 |
| SNORD108    | SNORD108    |             | 2.083356377 | 0.880336191 |             |
| 2.230120273 | 0.980760089 |             |             |             |             |
| KIAA1958    | KIAA1958    |             | 207.2939596 | 287.8699346 |             |
| 312.2168382 | 359.9389525 |             |             |             |             |
| GLG1        | GLG1        | 11227.20752 | 13480.5881  | 12610.21508 |             |
| 11123.78093 |             |             |             |             |             |
| ANXA8       | ANXA8       | 2.083356377 | 0.880336191 | 0           | 0           |
| ANKRD13D    | ANKRD13D    |             | 1819.811796 | 2026.533913 |             |
| 1117.290257 | 1519.197377 |             |             |             |             |
| SLC30A5     | SLC30A5     | 5770.897165 | 5289.059838 | 5497.246472 |             |
| 4806.705195 |             |             |             |             |             |
| TRAPPC2     | TRAPPC2     | 1515.641765 | 1092.497214 | 1944.664878 |             |
| 1433.87125  |             |             |             |             |             |
| SNX16       | SNX16       | 309.378422  | 272.9042193 | 284.3403347 |             |
| 185.3636568 |             |             |             |             |             |
| PDIK1L      | PDIK1L      | 1736.477541 | 1789.723477 | 1856.575127 |             |
| 1785.964121 |             |             |             |             |             |
| ST3GAL6     | ST3GAL6     | 4.166712755 | 4.401680957 | 0           | 7.846080709 |
| RAD51C      | RAD51C      | 5712.563187 | 5636.792634 | 3410.968957 |             |
| 4408.516599 |             |             |             |             |             |
| UBE2Q2      | UBE2Q2      | 4026.086199 | 3560.959894 | 3220.293674 |             |
| 2975.626109 |             |             |             |             |             |

|                 |               |               |               |
|-----------------|---------------|---------------|---------------|
| LINC00652       | LINC00652     | 15.62517283   | 4.401680957   |
| 33.45180409     | 22.55748204   |               |               |
| LOC100507144    | LOC100507144  | 1.041678189   | 0 0           |
| 3.923040355     |               |               |               |
| GALNT18 GALNT18 | 93.75103698   | 134.6914373   | 84.74457036   |
| 244.2092621     |               |               |               |
| TIPARP TIPARP   | 1054.178327   | 1660.314057   | 1331.381803   |
| 757.1467885     |               |               |               |
| CD300LG CD300LG | 0 0.880336191 | 0             | 0             |
| CDK10 CDK10     | 2342.734246   | 2126.892239   | 1661.439603   |
| 2319.49761      |               |               |               |
| HAUS3 HAUS3     | 2845.864812   | 2345.215614   | 3495.713527   |
| 2736.320647     |               |               |               |
| TRIM9 TRIM9     | 9.375103698   | 9.683698106   | 104.8156528   |
| 65.71092594     |               |               |               |
| HSPA12B HSPA12B | 4.166712755   | 8.803361914   | 10.03554123   |
| 2.942280266     |               |               |               |
| KDM1B KDM1B     | 114.5846008   | 720.9953408   | 109.2758934   |
| 603.1674545     |               |               |               |
| ANP32E ANP32E   | 20957.52348   | 24200.4419    | 13051.7789    |
| 16409.09704     |               |               |               |
| LYZL6 LYZL6     | 0 3.521344766 | 0             | 0             |
| ZNF235 ZNF235   | 405.2128154   | 277.3059003   | 564.220429    |
| 403.0923964     |               |               |               |
| SOCS6 SOCS6     | 356.2539405   | 319.5620375   | 231.9325083   |
| 215.7672195     |               |               |               |
| CD68 CD68       | 701.049421    | 249.1351422   | 312.2168382   |
| 432.5151991     |               |               |               |
| CD40 CD40       | 57.29230038   | 69.54655912   | 448.2541748   |
| 288.3434661     |               |               |               |
| MSX2 MSX2       | 2.083356377   | 0 3.345180409 | 0             |
| STK17B STK17B   | 11365.75072   | 15014.13374   | 11588.82      |
| 11507.25812     |               |               |               |
| MFHAS1 MFHAS1   | 768.7585033   | 1818.774572   | 673.4963223   |
| 592.3790936     |               |               |               |
| ACTL8 ACTL8     | 1.041678189   | 2.641008574   | 0 0           |
| DZIP1L DZIP1L   | 4.166712755   | 9.683698106   | 0 2.942280266 |
| SMAP2 SMAP2     | 37733.75071   | 40685.61742   | 27391.45225   |
| 34423.69835     |               |               |               |
| NBPF15 NBPF15   | 500.0055306   | 598.6286102   | 722.5589683   |
| 703.2049836     |               |               |               |
| C9orf91 C9orf91 | 1530.225259   | 2449.975621   | 1671.475144   |
| 1987.01994      |               |               |               |
| EEF1B2 EEF1B2   | 11117.83131   | 10483.04337   | 10404.62613   |
| 10507.86359     |               |               |               |
| ANKRD55 ANKRD55 | 165.626832    | 236.8104355   | 286.570455    |
| 177.517576      |               |               |               |
| RBCK1 RBCK1     | 5204.224231   | 4208.006995   | 6120.565088   |
| 5430.468611     |               |               |               |
| GRID1 GRID1     | 0 1.760672383 | 0             | 0             |

|                 |               |               |             |
|-----------------|---------------|---------------|-------------|
| EPDR1 EPDR1     | 2.083356377   | 84.51227438   | 42.37228518 |
| 69.6339663      |               |               |             |
| FOXRED1 FOXRED1 | 3289.61972    | 2952.647586   | 2069.551613 |
| 2839.300457     |               |               |             |
| NME6 NME6       | 1994.813731   | 1412.059251   | 1761.795015 |
| 1709.464835     |               |               |             |
| HES1 HES1       | 254.169478    | 390.869269    | 22.30120273 |
| 78.46080709     |               |               |             |
| CYTH4 CYTH4     | 1206.263343   | 2599.632773   | 1077.148092 |
| 1664.34987      |               |               |             |
| TOMM40 TOMM40   | 9042.808356   | 5952.833327   | 7036.02946  |
| 7427.296151     |               |               |             |
| COP55 COP55     | 6869.867654   | 6238.062253   | 6106.069306 |
| 5909.079534     |               |               |             |
| CTRC CTRC       | 1.041678189   | 0 6.690360818 | 0           |
| PTPDC1 PTPDC1   | 464.5884722   | 422.5613719   | 309.9867179 |
| 464.880282      |               |               |             |
| NGLY1 NGLY1     | 3819.833918   | 3291.57702    | 3563.732196 |
| 4369.286195     |               |               |             |
| DESI2 DESI2     | 2771.90566    | 2685.025384   | 2785.42022  |
| 2568.610672     |               |               |             |
| FBX042 FBX042   | 3148.993164   | 2545.051929   | 3281.621981 |
| 2910.895943     |               |               |             |
| PSMA5 PSMA5     | 21408.57013   | 18724.75079   | 16992.40142 |
| 15262.5885      |               |               |             |
| WSB2 WSB2       | 5628.187254   | 6119.216867   | 3210.258132 |
| 4590.937975     |               |               |             |
| ZMPSTE24        | ZMPSTE24      | 10444.9072    | 7430.917792 |
| 6654.678893     | 6704.475966   |               |             |
| RAMP3 RAMP3     | 1.041678189   | 0 0           | 0.980760089 |
| GDPD3 GDPD3     | 1.041678189   | 22.00840479   | 2.230120273 |
| 17.6536816      |               |               |             |
| UHRF1BP1        | UHRF1BP1      | 505.2139215   | 1030.87368  |
| 687.9921041     | 798.3387122   |               |             |
| CBX4 CBX4       | 400.0044245   | 561.6544901   | 834.0649819 |
| 432.5151991     |               |               |             |
| CHST1 CHST1     | 0 3.521344766 | 0             | 10.78836098 |
| DGKD DGKD       | 918.7601624   | 1921.773906   | 1549.933589 |
| 1589.812104     |               |               |             |
| TRIB2 TRIB2     | 1056.261683   | 2162.986022   | 907.6589509 |
| 805.2040328     |               |               |             |
| SENP5 SENP5     | 2221.899576   | 2210.524177   | 2145.375702 |
| 1736.926117     |               |               |             |
| PPARA PPARA     | 203.1272468   | 324.8440546   | 238.6228692 |
| 293.2472665     |               |               |             |
| PCP4L1 PCP4L1   | 6.250069132   | 21.12806859   | 8.92048109  |
| 15.69216142     |               |               |             |
| PGRMC1 PGRMC1   | 4151.087582   | 3059.168265   | 2651.613004 |
| 2930.511145     |               |               |             |
| NFE2 NFE2       | 1.041678189   | 2.641008574   | 6.690360818 |

|             |           |             |             |             |             |
|-------------|-----------|-------------|-------------|-------------|-------------|
| 2.942280266 |           |             |             |             |             |
| ZNF254      | ZNF254    | 775.0085724 | 875.0541743 | 1664.784783 |             |
| 1030.778853 |           |             |             |             |             |
| ZNF341      | ZNF341    | 666.6740408 | 588.0645759 | 572.0258499 |             |
| 548.2448896 |           |             |             |             |             |
| METTL9      | METTL9    | 6913.618138 | 5068.97579  | 6904.452364 |             |
| 5580.524905 |           |             |             |             |             |
| MTL5        | MTL5      | 97.91774974 | 199.8363155 | 85.85963049 |             |
| 134.3641321 |           |             |             |             |             |
| CD3D        | CD3D      | 19263.75474 | 21197.61515 | 14264.96432 |             |
| 16327.69396 |           |             |             |             |             |
| SAPCD1      | SAPCD1    | 2.083356377 | 6.16235334  | 2.230120273 |             |
| 0.980760089 |           |             |             |             |             |
| SH3RF3      | SH3RF3    | 17.70852921 | 2.641008574 | 17.84096218 |             |
| 43.1534439  |           |             |             |             |             |
| KLC2        | KLC2      | 1522.933512 | 1899.765501 | 1717.19261  |             |
| 1690.830393 |           |             |             |             |             |
| PYY2        | PYY2      | 2.083356377 | 0           | 3.345180409 | 0.980760089 |
| NOL3        | NOL3      | 147.9183028 | 183.1099278 | 60.21324736 |             |
| 175.5560559 |           |             |             |             |             |
| MY015B      | MY015B    | 5.208390943 | 24.64941336 | 98.12529199 |             |
| 46.09572417 |           |             |             |             |             |
| YOD1        | YOD1      | 523.9641289 | 662.8931522 | 723.6740284 |             |
| 549.2256497 |           |             |             |             |             |
| PPP1R3E     | PPP1R3E   | 63.54236951 | 91.55496391 | 162.7987799 |             |
| 160.8446545 |           |             |             |             |             |
| CDKL1       | CDKL1     | 133.3348082 | 102.9993344 | 103.7005927 |             |
| 217.7287397 |           |             |             |             |             |
| COL4A3      | COL4A3    | 1.041678189 | 3.521344766 | 17.84096218 |             |
| 8.826840798 |           |             |             |             |             |
| PDE4DIP     | PDE4DIP   | 9782.39987  | 6363.069992 | 5100.285063 |             |
| 3812.214465 |           |             |             |             |             |
| IPP         | IPP       | 1888.562556 | 1768.595409 | 1667.014904 |             |
| 2032.134904 |           |             |             |             |             |
| CA6         | CA6       | 471.8802195 | 142.614463  | 266.4993726 |             |
| 48.05724434 |           |             |             |             |             |
| GDF1        | GDF1      | 0           | 0.880336191 | 1.115060136 | 3.923040355 |
| LINC00901   | LINC00901 | 0           | 0           | 0           | 3.923040355 |
| KIF20B      | KIF20B    | 5304.225337 | 4569.82517  | 2940.413579 |             |
| 2889.319221 |           |             |             |             |             |
| ZNF460      | ZNF460    | 329.1703076 | 393.5102776 | 896.5083496 |             |
| 660.0515397 |           |             |             |             |             |
| 2-Sep       | 2-Sep     | 33594.12159 | 20746.88302 | 31430.20006 |             |
| 25231.03404 |           |             |             |             |             |
| LYSMD1      | LYSMD1    | 46.87551849 | 66.90555055 | 52.4078264  |             |
| 55.90332505 |           |             |             |             |             |
| RNF175      | RNF175    | 0           | 0           | 3.345180409 | 14.71140133 |
| VANGL1      | VANGL1    | 2595.862046 | 2510.718818 | 874.2071468 |             |
| 886.6071202 |           |             |             |             |             |
| KPNA3       | KPNA3     | 5224.016116 | 6495.12042  | 5074.63868  |             |

|             |         |             |             |             |             |
|-------------|---------|-------------|-------------|-------------|-------------|
| 5871.810651 |         |             |             |             |             |
| TIGD3       | TIGD3   | 47.91719668 | 52.82017149 | 84.74457036 |             |
| 70.61472638 |         |             |             |             |             |
| GADL1       | GADL1   | 0           | 0           | 4.460240545 | 0           |
| ZNF483      | ZNF483  | 31.25034566 | 24.64941336 | 83.62951022 |             |
| 29.42280266 |         |             |             |             |             |
| GSC         | GSC     | 0           | 0.880336191 | 1.115060136 | 0           |
| ZFP41       | ZFP41   | 154.1683719 | 324.8440546 | 573.14091   |             |
| 515.8798066 |         |             |             |             |             |
| CEP57L1     | CEP57L1 | 1119.804053 | 1020.309646 | 883.1276279 |             |
| 913.0876425 |         |             |             |             |             |
| RARB        | RARB    | 4.166712755 | 7.042689532 | 11.15060136 |             |
| 14.71140133 |         |             |             |             |             |
| MAPK11      | MAPK11  | 27.08363291 | 175.1869021 | 59.09818722 |             |
| 60.8071255  |         |             |             |             |             |
| VSTM4       | VSTM4   | 29.16698928 | 63.38420578 | 6.690360818 |             |
| 43.1534439  |         |             |             |             |             |
| ZFC3H1      | ZFC3H1  | 1505.224983 | 2647.170928 | 1846.539586 |             |
| 2235.152242 |         |             |             |             |             |
| AP1S3       | AP1S3   | 352.0872278 | 303.715986  | 485.0511593 |             |
| 396.2270758 |         |             |             |             |             |
| ZNF276      | ZNF276  | 1896.895982 | 2206.122496 | 2014.913666 |             |
| 1971.327778 |         |             |             |             |             |
| ZNF214      | ZNF214  | 4.166712755 | 0.880336191 | 0           | 0           |
| RPS6KA3     | RPS6KA3 | 5888.606801 | 8751.422079 | 5690.151875 |             |
| 6268.037727 |         |             |             |             |             |
| RC3H2       | RC3H2   | 2694.821474 | 3561.840231 | 2551.257592 |             |
| 1868.347969 |         |             |             |             |             |
| FL0T2       | FL0T2   | 10913.66238 | 9840.397948 | 7858.94384  |             |
| 10095.94435 |         |             |             |             |             |
| FUT7        | FUT7    | 489.5887487 | 2760.734296 | 267.6144327 |             |
| 888.5686403 |         |             |             |             |             |
| FRG1        | FRG1    | 2665.654485 | 2435.890242 | 2018.258847 |             |
| 2261.632764 |         |             |             |             |             |
| PDZD7       | PDZD7   | 52.08390943 | 46.65781815 | 73.59396899 |             |
| 102.9798093 |         |             |             |             |             |
| SCUBE2      | SCUBE2  | 0           | 0           | 3.345180409 | 0           |
| FAM170B     | FAM170B | 4.166712755 | 0.880336191 | 0           | 7.846080709 |
| INCA1       | INCA1   | 82.29257691 | 65.14487817 | 117.0813143 |             |
| 137.3064124 |         |             |             |             |             |
| ZBTB24      | ZBTB24  | 2762.530556 | 2445.57394  | 3186.841869 |             |
| 2367.554854 |         |             |             |             |             |
| RPS13       | RPS13   | 13648.06763 | 14945.46752 | 18667.22174 |             |
| 15145.87805 |         |             |             |             |             |
| NUDT14      | NUDT14  | 388.5459644 | 235.9300993 | 419.2626112 |             |
| 243.228502  |         |             |             |             |             |
| SETDB2      | SETDB2  | 1537.517007 | 1394.452527 | 2192.208228 |             |
| 1894.828491 |         |             |             |             |             |
| ZNF540      | ZNF540  | 45.8338403  | 41.375801   | 500.6620012 |             |
| 204.9788585 |         |             |             |             |             |



|             |           |             |             |             |             |
|-------------|-----------|-------------|-------------|-------------|-------------|
| GNAL        | GNAL      | 897.9265987 | 986.8568706 | 766.0463136 |             |
| 892.4916807 |           |             |             |             |             |
| CCND3       | CCND3     | 46666.14118 | 39885.39183 | 26468.18245 |             |
| 40047.3767  |           |             |             |             |             |
| DLGAP2      | DLGAP2    | 0           | 2.641008574 | 0           |             |
| RPL41       | RPL41     | 8335.508866 | 7574.412591 | 10222.87133 |             |
| 8924.916807 |           |             |             |             |             |
| TMSB10      | TMSB10    | 88806.19062 | 115210.4777 | 50057.27964 |             |
| 50506.20229 |           |             |             |             |             |
| UBASH3A     | UBASH3A   | 3701.082604 | 2934.160526 | 2517.805788 |             |
| 2551.937751 |           |             |             |             |             |
| COBLL1      | COBLL1    | 2.083356377 | 7.923025723 | 0           | 32.36508293 |
| WDR16       | WDR16     | 1.041678189 | 2.641008574 | 0           | 0           |
| SNORD49B    | SNORD49B  |             | 180.2103266 | 143.4947992 |             |
| 235.2776888 |           | 245.1900222 |             |             |             |
| SNORD45C    | SNORD45C  |             | 23.95859834 | 9.683698106 |             |
| 12.2656615  |           | 22.55748204 |             |             |             |
| ZNF70       | ZNF70     | 29.16698928 | 33.45277527 | 93.66505145 |             |
| 62.76864567 |           |             |             |             |             |
| ZNF69       | ZNF69     | 20.83356377 | 27.29042193 | 95.89517172 |             |
| 67.67244612 |           |             |             |             |             |
| MPP7        | MPP7      | 78.12586415 | 62.50386959 | 1254.442653 |             |
| 1061.182416 |           |             |             |             |             |
| MTIF3       | MTIF3     | 2838.573064 | 2737.845555 | 2538.99193  |             |
| 2268.498085 |           |             |             |             |             |
| TNFRSF25    | TNFRSF25  |             | 7000.077428 | 4034.580765 |             |
| 4482.541748 |           | 5674.677873 |             |             |             |
| FGFR1       | FGFR1     | 1485.433097 | 3614.660402 | 453.8294755 |             |
| 1135.720183 |           |             |             |             |             |
| PLEKHD1     | PLEKHD1   | 0           | 0.880336191 | 1.115060136 | 1.961520177 |
| TCOF1       | TCOF1     | 7916.754234 | 7764.565208 | 7194.367999 |             |
| 8443.363603 |           |             |             |             |             |
| RPS3A       | RPS3A     | 17597.06964 | 22379.90666 | 22994.77013 |             |
| 20671.48039 |           |             |             |             |             |
| ADH6        | ADH6      | 3.125034566 | 5.282017149 | 2.230120273 |             |
| 6.865320621 |           |             |             |             |             |
| CCNA1       | CCNA1     | 432.2964483 | 379.4248985 | 25.64638313 |             |
| 56.88408514 |           |             |             |             |             |
| IL15RA      | IL15RA    | 2433.360249 | 1580.203464 | 2680.604568 |             |
| 2015.461982 |           |             |             |             |             |
| ADRM1       | ADRM1     | 12430.34583 | 8502.286937 | 8434.314871 |             |
| 8274.672868 |           |             |             |             |             |
| RNU12       | RNU12     | 6.250069132 | 6.16235334  | 11.15060136 |             |
| 3.923040355 |           |             |             |             |             |
| LINC01140   | LINC01140 |             | 6.250069132 | 1.760672383 |             |
| 6.690360818 |           | 14.71140133 |             |             |             |
| LOC145837   | LOC145837 |             | 1.041678189 | 0.880336191 | 0           |
| 0           |           |             |             |             |             |
| VPS9D1      | VPS9D1    | 118.7513135 | 202.477324  | 150.5331184 |             |
| 188.305937  |           |             |             |             |             |

|             |             |               |               |               |
|-------------|-------------|---------------|---------------|---------------|
| CDK17       | CDK17       | 4521.925017   | 3648.993514   | 6746.113824   |
| 5374.565286 |             |               |               |               |
| SLC44A3     | SLC44A3     | 1.041678189   | 8.803361914   | 0 4.903800443 |
| RNU5E-1     | RNU5E-1     | 0 0.880336191 | 1.115060136   | 0             |
| ATRX        | ATRX        | 3757.333227   | 3549.515524   | 4064.394197   |
| 4100.557931 |             |               |               |               |
| ATP1A4      | ATP1A4      | 14.58349464   | 0 31.22168382 | 6.865320621   |
| SPINK7      | SPINK7      | 0 0.880336191 | 0 0           |               |
| DGAT2       | DGAT2       | 421.8796664   | 272.0238832   | 480.5909187   |
| 480.5724434 |             |               |               |               |
| POLB        | POLB        | 2063.564492   | 2052.943998   | 1555.50889    |
| 1887.963171 |             |               |               |               |
| CTRL        | CTRL        | 260.4195472   | 419.0400271   | 532.9987451   |
| 323.6508293 |             |               |               |               |
| CSNK2A2     | CSNK2A2     | 147.9183028   | 278.1862365   | 197.3656441   |
| 146.1332532 |             |               |               |               |
| MUT         | MUT         | 3156.284912   | 3433.311147   | 2317.094963   |
| 3260.046535 |             |               |               |               |
| SERPIND1    | SERPIND1    |               | 13.54181645   | 11.44437049   |
| 32.33674395 | 27.46128248 |               |               |               |
| HADHB       | HADHB       | 9128.225968   | 7394.824008   | 5781.586807   |
| 6315.114211 |             |               |               |               |
| STOM        | STOM        | 3157.32659    | 4552.218446   | 8531.325103   |
| 7163.471688 |             |               |               |               |
| THEMIS2     | THEMIS2     | 3983.377394   | 2159.464678   | 2018.258847   |
| 1799.694763 |             |               |               |               |
| BOLA2B      | BOLA2B      | 531.2558762   | 691.0639103   | 333.4029807   |
| 626.7056967 |             |               |               |               |
| FCGR2B      | FCGR2B      | 3.125034566   | 1.760672383   | 0 5.884560532 |
| TSHZ3       | TSHZ3       | 9.375103698   | 33.45277527   | 12.2656615    |
| 66.69168603 |             |               |               |               |
| MYOM1       | MYOM1       | 26.04195472   | 39.61512861   | 46.83252572   |
| 77.480047   |             |               |               |               |
| CABP5       | CABP5       | 0 0           | 0 0.980760089 |               |
| RWDD3       | RWDD3       | 843.7593328   | 821.3536666   | 732.5945095   |
| 940.548925  |             |               |               |               |
| KIAA1468    | KIAA1468    |               | 1663.560067   | 1511.537241   |
| 1696.006467 | 1614.331106 |               |               |               |
| KIAA1467    | KIAA1467    |               | 221.8774542   | 477.1422158   |
| 178.4096218 | 392.3040355 |               |               |               |
| METTL3      | METTL3      | 4293.797494   | 4236.177753   | 2755.313597   |
| 3779.849382 |             |               |               |               |
| DAW1        | DAW1        | 0 0           | 0 0.980760089 |               |
| AGPAT6      | AGPAT6      | 5634.437323   | 5726.586925   | 5215.136257   |
| 5566.794263 |             |               |               |               |
| CMTM4       | CMTM4       | 14.58349464   | 17.60672383   | 53.52288654   |
| 19.61520177 |             |               |               |               |
| ARL5B       | ARL5B       | 1241.680401   | 1554.673714   | 1239.946872   |
| 1007.240611 |             |               |               |               |
| TSACC       | TSACC       | 83.3342551    | 52.82017149   | 122.656615    |

|             |         |             |             |             |             |
|-------------|---------|-------------|-------------|-------------|-------------|
| 69.6339663  |         |             |             |             |             |
| WDR64       | WDR64   | 5.208390943 | 0           | 181.7548022 | 14.71140133 |
| FAM91A1     | FAM91A1 | 9532.397105 | 7404.507706 | 5644.43441  |             |
| 6043.443666 |         |             |             |             |             |
| MED25       | MED25   | 858.3428275 | 1317.863279 | 611.0529547 |             |
| 785.588831  |         |             |             |             |             |
| TUBA4B      | TUBA4B  | 11.45846008 | 21.12806859 | 4.460240545 |             |
| 2.942280266 |         |             |             |             |             |
| SCARNA9     | SCARNA9 | 114.5846008 | 122.3667306 | 71.36384872 |             |
| 67.67244612 |         |             |             |             |             |
| LRIG1       | LRIG1   | 5811.522615 | 5114.753272 | 6261.062665 |             |
| 5465.775974 |         |             |             |             |             |
| PYG01       | PYG01   | 0           | 1.760672383 | 0           | 0           |
| UBXN7       | UBXN7   | 3733.374628 | 4538.133067 | 3558.156895 |             |
| 3698.446294 |         |             |             |             |             |
| WDHD1       | WDHD1   | 6036.525104 | 6051.43098  | 3625.060503 |             |
| 4485.015885 |         |             |             |             |             |
| APRT        | APRT    | 8993.849481 | 7491.660989 | 9456.825016 |             |
| 11092.3966  |         |             |             |             |             |
| ANGPTL4     | ANGPTL4 | 16.66685102 | 23.76907717 | 6.690360818 |             |
| 32.36508293 |         |             |             |             |             |
| SDCBP2      | SDCBP2  | 204.168925  | 80.99092961 | 294.375876  |             |
| 134.3641321 |         |             |             |             |             |
| TPMT        | TPMT    | 1897.93766  | 1158.522428 | 1439.542636 |             |
| 1403.467687 |         |             |             |             |             |
| MDFIC       | MDFIC   | 8804.264051 | 5161.41109  | 7344.901118 |             |
| 6920.243186 |         |             |             |             |             |
| SCD5        | SCD5    | 1.041678189 | 18.48706002 | 6.690360818 |             |
| 7.846080709 |         |             |             |             |             |
| NCKAP5L     | NCKAP5L | 44.79216211 | 99.47798963 | 311.101778  |             |
| 218.7094998 |         |             |             |             |             |
| H2AFB2      | H2AFB2  | 0           | 0.880336191 | 0           | 2.942280266 |
| OPA3        | OPA3    | 1655.226642 | 1552.032706 | 1488.605282 |             |
| 1425.044409 |         |             |             |             |             |
| HILPDA      | HILPDA  | 513.547347  | 604.7909635 | 651.1951196 |             |
| 1285.776476 |         |             |             |             |             |
| FAM89B      | FAM89B  | 3391.704182 | 4917.557965 | 2328.245565 |             |
| 3660.196651 |         |             |             |             |             |
| RPP14       | RPP14   | 2377.109627 | 1802.92852  | 2415.220255 |             |
| 2027.231103 |         |             |             |             |             |
| FANCL       | FANCL   | 2307.317188 | 1876.87676  | 1523.172146 |             |
| 1861.482648 |         |             |             |             |             |
| EIF4E1B     | EIF4E1B | 1.041678189 | 2.641008574 | 0           | 2.942280266 |
| LRCH1       | LRCH1   | 946.8854735 | 1375.965467 | 1028.085446 |             |
| 916.0299228 |         |             |             |             |             |
| GDA         | GDA     | 0           | 0           | 1.961520177 |             |
| C8orf76     | C8orf76 | 2310.442223 | 1841.663312 | 1516.481785 |             |
| 1357.371963 |         |             |             |             |             |
| TRAF6       | TRAF6   | 980.2191756 | 842.4817352 | 1722.767911 |             |
| 1127.874102 |         |             |             |             |             |

|             |             |             |             |             |
|-------------|-------------|-------------|-------------|-------------|
| BPNT1       | BPNT1       | 1335.431438 | 1401.495217 | 1301.275179 |
| 1268.122795 |             |             |             |             |
| FDX1        | FDX1        | 2829.197961 | 2805.631442 | 2592.514817 |
| 2243.979083 |             |             |             |             |
| GPX3        | GPX3        | 6.250069132 | 39.61512861 | 34.56686422 |
| 24.51900222 |             |             |             |             |
| ERCC1       | ERCC1       | 4394.840278 | 2799.469089 | 3114.362961 |
| 3769.061021 |             |             |             |             |
| IKBKAP      | IKBKAP      | 4782.344564 | 4720.362658 | 4504.842951 |
| 4961.665289 |             |             |             |             |
| KMT2D       | KMT2D       | 541.6726581 | 1362.760424 | 927.7300334 |
| 903.2800417 |             |             |             |             |
| SLC39A11    | SLC39A11    |             | 643.7571206 | 457.7748195 |
| 389.1559876 | 606.1097348 |             |             |             |
| ERI1        | ERI1        | 9737.607708 | 6883.348681 | 4236.113458 |
| 4302.594509 |             |             |             |             |
| KCTD6       | KCTD6       | 871.8846439 | 1048.480404 | 868.6318462 |
| 574.725412  |             |             |             |             |
| FAM3B       | FAM3B       | 0           | 4.401680957 | 2.230120273 |
| 0           | 0           |             |             | 0           |
| TLR7        | TLR7        | 9.375103698 | 1.760672383 | 0           |
| 0           |             |             |             | 6.865320621 |
| LINC00341   | LINC00341   |             | 60.41733494 | 115.3240411 |
| 32.33674395 | 25.49976231 |             |             |             |
| SAMD14      | SAMD14      | 14.58349464 | 17.60672383 | 12.2656615  |
| 32.36508293 |             |             |             |             |
| LINC00239   | LINC00239   |             | 152.0850156 | 266.741866  |
| 89.2048109  | 140.2486927 |             |             |             |
| TBXAS1      | TBXAS1      | 388.5459644 | 707.7902979 | 269.844553  |
| 544.3218492 |             |             |             |             |
| ISL2        | ISL2        | 82.29257691 | 192.7936259 | 6.690360818 |
| 30.40356275 |             |             |             |             |
| PCDH8       | PCDH8       | 73.9591514  | 26.41008574 | 0           |
| 0           | 0           |             |             | 0           |
| SUCNR1      | SUCNR1      | 0           | 0           | 0.980760089 |
| 0           |             |             |             |             |
| ERN1        | ERN1        | 929.1769443 | 852.1654333 | 1253.327593 |
| 880.7225596 |             |             |             |             |
| AGTRAP      | AGTRAP      | 1760.436139 | 1575.801783 | 861.9414853 |
| 923.8760035 |             |             |             |             |
| ZMAT5       | ZMAT5       | 1597.934341 | 1105.702256 | 1163.007722 |
| 1089.624459 |             |             |             |             |
| KIAA0556    | KIAA0556    |             | 378.1291825 | 559.8938178 |
| 662.3457209 | 484.4954838 |             |             |             |
| HAS3        | HAS3        | 2406.276616 | 2317.044856 | 2291.44858  |
| 2381.285495 |             |             |             |             |
| UCHL5       | UCHL5       | 9116.767507 | 6349.864949 | 7237.855344 |
| 7749.966221 |             |             |             |             |
| KIF21B      | KIF21B      | 993.760992  | 3049.484567 | 1185.308925 |
| 1331.8722   |             |             |             |             |
| WWC1        | WWC1        | 3.125034566 | 0           | 28.99156354 |
| 0           | 0           |             |             | 22.55748204 |
| LPHN3       | LPHN3       | 0           | 1.760672383 | 0           |
| 0           |             |             |             | 0           |
| PLSCR3      | PLSCR3      | 5077.139492 | 4463.304491 | 3141.124404 |
| 4116.250092 |             |             |             |             |

|             |         |              |             |             |
|-------------|---------|--------------|-------------|-------------|
| ZNF684      | ZNF684  | 398.9627463  | 360.0575023 | 388.0409274 |
| 306.9779078 |         |              |             |             |
| UBAC2       | UBAC2   | 2741.696993  | 2464.941336 | 4759.076662 |
| 3921.078834 |         |              |             |             |
| HMG1        | HMG1    | 19092.91952  | 15806.43632 | 15131.36605 |
| 16017.77377 |         |              |             |             |
| GID8        | GID8    | 1985.438628  | 2315.284183 | 2479.893743 |
| 2203.767919 |         |              |             |             |
| B3GNT3      | B3GNT3  | 0            | 0           | 18.95602232 |
| 708.3411683 |         |              |             | 7.846080709 |
| COR02A      | COR02A  | 1579.023743  | 1381.247484 | 892.048109  |
| 11141.78991 |         |              |             |             |
| WIPF1       | WIPF1   | 17385.75944  | 10167.11832 |             |
| 9115.184264 |         |              |             |             |
| ALPK3       | ALPK3   | 8.33342551   | 7.042689532 | 0           |
| 3667.748902 |         |              |             | 14.71140133 |
| MSL3        | MSL3    | 5230.393553  | 3284.53433  | 5961.111488 |
| DCAF6       | DCAF6   | 1542.725397  | 2131.293919 | 2043.90523  |
| 2022.327303 |         |              |             |             |
| RPA3        | RPA3    | 5480.268951  | 7224.919123 | 4675.447151 |
| 5917.906375 |         |              |             |             |
| SMPDL3B     | SMPDL3B | 42.70880574  | 69.54655912 | 24.531323   |
| 37.26888337 |         |              |             |             |
| SH2D4B      | SH2D4B  | 4.166712755  | 0           | 17.84096218 |
| 4093.795282 |         |              |             | 1.961520177 |
| DYNC1H1     | DYNC1H1 | 4558.572892  | 6936.168852 | 4843.821232 |
| 2015.647295 |         |              |             |             |
| GTF2E1      | GTF2E1  | 2028.294585  | 1756.219715 |             |
| 1999.769821 |         |              |             |             |
| TBC1D31     | TBC1D31 | 1555.225536  | 1873.355415 | 1157.432421 |
| 1521.158898 |         |              |             |             |
| SLC1A2      | SLC1A2  | 0            | 0           | 33.45180409 |
| 2139.607    |         |              |             | 3.923040355 |
| TGFBR3      | TGFBR3  | 1011.163651  | 1397.093536 | 1518.711906 |
| 1736375.456 |         |              |             |             |
| ACTB        | ACTB    | 1513409.716  | 831515.9545 |             |
| 1262400.06  |         |              |             |             |
| ACTA1       | ACTA1   | 2.083356377  | 0           | 0           |
| 1.041678189 |         |              |             | 0           |
| B3GAT1      | B3GAT1  | 3004.199896  | 3369.046605 | 1998.187764 |
| 2382.266255 |         |              |             |             |
| NADK        | NADK    | 1392.723738  | 978.9338449 | 1465.189019 |
| 984.683129  |         |              |             |             |
| UPF3A       | UPF3A   | 3.125034566  | 1.760672383 | 0           |
| 3790.666929 |         |              |             | 0           |
| ABCA6       | ABCA6   | 6094.567453  | 5558.574779 |             |
| 4021.116364 |         |              |             |             |
| KMT2A       | KMT2A   | 2.083356377  | 2.641008574 | 13.38072164 |
| 5.884560532 |         |              |             |             |
| CNGA1       | CNGA1   | LOC100132352 | 169.7935448 | 195.4346345 |
| 259.8090118 |         | LOC100132352 |             |             |
| 264.8052239 |         |              |             |             |
| SYT12       | SYT12   | 0            | 0           | 0.980760089 |
| 147.9183028 |         |              |             |             |
| EFNA4       | EFNA4   | 149.6571525  | 137.1523968 |             |
| 124.5565313 |         |              |             |             |

|              |              |             |             |             |   |
|--------------|--------------|-------------|-------------|-------------|---|
| E2F1         | E2F1         | 6274.027731 | 7148.329874 | 2814.411784 |   |
| 4385.959117  |              |             |             |             |   |
| BTLA         | BTLA         | 1129.179157 | 1308.17958  | 957.8366571 |   |
| 1811.463884  |              |             |             |             |   |
| NAA16        | NAA16        | 1465.641212 | 1494.810853 | 1149.627    |   |
| 1154.354624  |              |             |             |             |   |
| PAXBP1-AS1   | PAXBP1-AS1   | 197.1327778 | 176.0436139 | 154.0588335 |   |
| 256.4638313  |              |             |             |             |   |
| LOC151475    | LOC151475    |             | 1.041678189 | 3.521344766 | 0 |
| 0            |              |             |             |             |   |
| LOC729950    | LOC729950    |             | 0           | 3.345180409 | 0 |
| LOC100505474 | LOC100505474 |             | 0           | 2.230120273 | 0 |
| GOLGA8S      | GOLGA8S      | 0           | 1.115060136 | 0           |   |
| PMM2         | PMM2         | 1618.767905 | 1530.024301 | 1655.864302 |   |
| 1690.830393  |              |             |             |             |   |
| DOT1L        | DOT1L        | 1270.84739  | 1438.469337 | 1097.219174 |   |
| 1367.179564  |              |             |             |             |   |
| FAM76B       | FAM76B       | 1635.434756 | 1875.996424 | 1787.441398 |   |
| 1578.042983  |              |             |             |             |   |
| DOCK11       | DOCK11       | 2886.490261 | 4918.438302 | 2178.827506 |   |
| 2392.073856  |              |             |             |             |   |
| TRAP1        | TRAP1        | 14659.53715 | 10262.95932 | 10506.0966  |   |
| 14418.15406  |              |             |             |             |   |
| CRBN         | CRBN         | 3368.787262 | 3060.928938 | 4265.105021 |   |
| 3444.429431  |              |             |             |             |   |
| HP1BP3       | HP1BP3       | 11320.95855 | 13043.94135 | 9094.430471 |   |
| 11892.69684  |              |             |             |             |   |
| CSTF2        | CSTF2        | 8568.84478  | 5790.851467 | 5179.454333 |   |
| 6062.078108  |              |             |             |             |   |
| TAF5         | TAF5         | 1934.396396 | 2008.046853 | 1697.121527 |   |
| 1669.253671  |              |             |             |             |   |
| OPRM1        | OPRM1        | 154.1683719 | 130.2897563 | 431.5282727 |   |
| 209.882659   |              |             |             |             |   |
| SPATA31C2    | SPATA31C2    |             | 16.66685102 | 10.5640343  | 0 |
| 17.6536816   |              |             |             |             |   |
| GRIK5        | GRIK5        | 0           | 5.282017149 | 8.826840798 |   |
| DRD3         | DRD3         | 1.041678189 | 0.880336191 | 5.575300681 |   |
| 0.980760089  |              |             |             |             |   |
| ARHGAP17     | ARHGAP17     |             | 2002.105479 | 2484.308732 |   |
| 2875.740091  |              |             |             |             |   |
| INPP5B       | INPP5B       | 2630.237426 | 2819.716821 | 2908.076835 |   |
| 2806.935374  |              |             |             |             |   |
| FXR2         | FXR2         | 3401.079286 | 3101.424402 | 3270.47138  |   |
| 2991.31827   |              |             |             |             |   |
| RHD          | RHD          | 59.37565676 | 44.01680957 | 88.08975076 |   |
| 52.96104479  |              |             |             |             |   |
| ADAM20       | ADAM20       | 0           | 0           | 0.980760089 |   |
| CD79A        | CD79A        | 78.12586415 | 141.7341268 | 81.39938995 |   |
| 125.5372913  |              |             |             |             |   |
| CD69         | CD69         | 4816.719945 | 3428.029129 | 12651.47231 |   |

|             |             |             |             |             |
|-------------|-------------|-------------|-------------|-------------|
| 15923.6208  |             |             |             |             |
| CD63        | CD63        | 5804.230867 | 5131.47966  | 4744.58088  |
| 6628.957439 |             |             |             |             |
| SLA         | SLA         | 17172.06494 | 21208.17919 | 10936.50982 |
| 16607.21058 |             |             |             |             |
| CNNM2       | CNNM2       | 245.8360525 | 261.4598489 | 296.6059962 |
| 203.9980984 |             |             |             |             |
| PLCG2       | PLCG2       | 932.3019789 | 1508.015896 | 729.2493291 |
| 698.3011831 |             |             |             |             |
| MCM4        | MCM4        | 33122.24137 | 29446.36527 | 19180.1494  |
| 24214.96659 |             |             |             |             |
| C11orf95    | C11orf95    |             | 32.29202385 | 29.05109432 |
| 62.44336763 | 9.807600887 |             |             |             |
| C5orf55     | C5orf55     | 143.75159   | 176.9475745 | 143.8427576 |
| 115.7296905 |             |             |             |             |
| NFKB1       | NFKB1       | 17938.74009 | 11970.81153 | 21015.53839 |
| 21676.75948 |             |             |             |             |
| CASC8       | CASC8       | 0           | 0.880336191 | 0           |
| MORN2       | MORN2       | 411.4628845 | 305.4766584 | 359.0493639 |
| 329.5353898 |             |             |             |             |
| GREM2       | GREM2       | 30.20866747 | 67.78588674 | 52.4078264  |
| 97.09524878 |             |             |             |             |
| DAPK2       | DAPK2       | 111.4595662 | 163.7425316 | 25.64638313 |
| 71.59548647 |             |             |             |             |
| METTL5      | METTL5      | 4572.967248 | 4027.538076 | 4094.50082  |
| 4440.881681 |             |             |             |             |
| IGSF8       | IGSF8       | 1878.145774 | 2207.002832 | 2721.861793 |
| 2569.591432 |             |             |             |             |
| IQSEC2      | IQSEC2      | 3.125034566 | 1.760672383 | 0           |
| C11orf84    | C11orf84    |             | 70.83411683 | 3.923040355 |
| 66.90360818 | 70.61472638 |             |             | 394.3906138 |
| AES         | AES         | 16741.85185 | 15896.23061 | 10027.73581 |
| 9676.179035 |             |             |             |             |
| GSDMB       | GSDMB       | 100.0011061 | 228.8874098 | 247.5433503 |
| 106.9028497 |             |             |             |             |
| VSIG10      | VSIG10      | 115.6262789 | 100.3583258 | 41.25722504 |
| 103.9605694 |             |             |             |             |
| TAC01       | TAC01       | 1897.93766  | 2081.995093 | 1704.926948 |
| 1799.694763 |             |             |             |             |
| PPOX        | PPOX        | 1217.721803 | 851.2850971 | 913.2342516 |
| 955.2603264 |             |             |             |             |
| KIAA1598    | KIAA1598    |             | 3.125034566 | 2.641008574 |
| 5.575300681 | 10.78836098 |             |             |             |
| APOD        | APOD        | 1498.974914 | 516.7573444 | 374.6602058 |
| 165.748455  |             |             |             |             |
| KMT2B       | KMT2B       | 370.8374352 | 500.9112929 | 448.2541748 |
| 287.362706  |             |             |             |             |
| FETUB       | FETUB       | 0           | 0           | 1.961520177 |
| MAP2K1      | MAP2K1      | 4195.879744 | 5863.039035 | 3766.67314  |
| 4573.284293 |             |             |             |             |

|                 |             |     |               |             |
|-----------------|-------------|-----|---------------|-------------|
| TMEM106C        | TMEM106C    |     | 12791.80816   | 10298.17277 |
| 7812.111315     | 9606.545069 |     |               |             |
| SLC5A5 SLC5A5   | 61.45901313 |     | 28.17075813   | 131.5770961 |
| 49.03800443     |             |     |               |             |
| ABLIM1 ABLIM1   | 5072.972779 |     | 4957.173094   | 12759.63314 |
| 10544.15171     |             |     |               |             |
| RBX1 RBX1       | 11799.08884 |     | 14188.3784    | 10807.16284 |
| 11100.24268     |             |     |               |             |
| VIPAS39 VIPAS39 | 1697.935448 |     | 1200.778565   | 984.5981003 |
| 1246.546073     |             |     |               |             |
| STXBP1 STXBP1   | 352.0872278 |     | 635.6027302   | 709.1782467 |
| 929.7605641     |             |     |               |             |
| PKM PKM         | 105223.0389 |     | 147080.4085   | 81196.449   |
| 132120.1531     |             |     |               |             |
| FGFR10P FGFR10P | 2280.233555 |     | 1692.886496   | 1406.090832 |
| 1550.5817       |             |     |               |             |
| RNF41 RNF41     | 3010.449965 |     | 2732.563538   | 3231.444275 |
| 2780.454851     |             |     |               |             |
| CNNM3 CNNM3     | 2778.155729 |     | 1766.834736   | 2431.946157 |
| 2278.305686     |             |     |               |             |
| ZNF75A ZNF75A   | 756.258365  |     | 679.6195398   | 1290.124578 |
| 1032.740373     |             |     |               |             |
| FAM218A FAM218A | 30.20866747 |     | 26.41008574   | 51.29276627 |
| 75.51852683     |             |     |               |             |
| LYG2 LYG2       | 1.041678189 |     | 4.401680957   | 6.690360818 |
| 5.884560532     |             |     |               |             |
| HTRA4 HTRA4     | 1.041678189 |     | 2.641008574   | 2.230120273 |
| 4.903800443     |             |     |               |             |
| CACNA2D2        | CACNA2D2    |     | 18.7502074    | 55.46118006 |
| 165.0289002     | 82.38384745 |     |               |             |
| CRCP CRCP       | 1355.223324 |     | 1283.530167   | 1878.87633  |
| 1511.351297     |             |     |               |             |
| TMEM11 TMEM11   | 3820.875596 |     | 2740.486564   | 2799.916002 |
| 2975.626109     |             |     |               |             |
| EBF1 EBF1       | 6.250069132 |     | 10.5640343    | 2.230120273 |
| 3.923040355     |             |     |               |             |
| TARBP2 TARBP2   | 2406.276616 |     | 1922.654242   | 1940.204637 |
| 2157.672195     |             |     |               |             |
| LIMS3L LIMS3L   | 1.041678189 |     | 0 1.115060136 | 0.980760089 |
| E2F8 E2F8       | 3101.075968 |     | 3295.098365   | 1264.478195 |
| 1453.486451     |             |     |               |             |
| AGBL1           | AGBL1       | 0 0 | 0 2.942280266 |             |
| EIF1AD EIF1AD   | 1825.020187 |     | 1680.561789   | 2523.381088 |
| 1786.944882     |             |     |               |             |
| ETS1 ETS1       | 18307.49417 |     | 34979.27823   | 16384.69364 |
| 21781.70081     |             |     |               |             |
| AQP8            | AQP8        | 0 0 | 1.115060136   | 0           |
| TIMM23 TIMM23   | 7755.294115 |     | 5220.393615   | 5501.706712 |
| 5574.640344     |             |     |               |             |
| TULP1           | TULP1       | 0 0 | 3.345180409   | 8.826840798 |



|               |               |             |             |             |
|---------------|---------------|-------------|-------------|-------------|
| TUFM          | TUFM          | 23304.42444 | 14731.54583 | 18705.13379 |
| 18676.61437   |               |             |             |             |
| SGTA          | SGTA          | 7318.830954 | 5263.530089 | 5257.508542 |
| 4846.916358   |               |             |             |             |
| RPL35A        | RPL35A        | 10615.74242 | 12578.2435  | 13764.30232 |
| 12673.38187   |               |             |             |             |
| ACVR1         | ACVR1         | 1650.018251 | 1422.623285 | 1648.058881 |
| 1158.277665   |               |             |             |             |
| CDK9          | CDK9          | 6233.402281 | 5556.68204  | 5597.601884 |
| 5747.25412    |               |             |             |             |
| COL6A1        | COL6A1        | 371.8791134 | 106.5206792 | 146.0728779 |
| 204.9788585   |               |             |             |             |
| ANKFY1        | ANKFY1        | 4306.297632 | 4870.019811 | 4209.352014 |
| 3806.329904   |               |             |             |             |
| TBC1D7        | TBC1D7        | 2183.357484 | 2599.632773 | 924.384853  |
| 1419.159848   |               |             |             |             |
| ERAP2         | ERAP2         | 21021.06585 | 9705.706511 | 32417.02828 |
| 11979.00372   |               |             |             |             |
| TRIM14        | TRIM14        | 7468.832613 | 6017.097868 | 7605.825189 |
| 5887.502812   |               |             |             |             |
| BDP1          | BDP1          | 2021.897364 | 2278.310063 | 2434.176277 |
| 2321.45913    |               |             |             |             |
| TMEM126B      | TMEM126B      |             | 2798.989293 | 3361.123579 |
| 3424.349678   | 3284.565537   |             |             |             |
| LRRD1         | LRRD1         | 0           | 0           | 4.460240545 |
| ZNF559-ZNF177 | ZNF559-ZNF177 |             | 127.084739  | 4.903800443 |
| 457.1746559   | 175.5560559   |             |             | 86.27294676 |
| PTPRF         | PTPRF         | 0           | 53.70050768 | 3.345180409 |
| GNRH1         | GNRH1         | 9.375103698 | 16.72638764 | 29.42280266 |
| 6.865320621   |               |             |             |             |
| EIF4G3        | EIF4G3        | 3187.535257 | 4097.964971 | 2270.262437 |
| 3151.182165   |               |             |             |             |
| PEX13         | PEX13         | 1854.187176 | 1376.845803 | 1614.607077 |
| 1494.678375   |               |             |             |             |
| SLC22A18      | SLC22A18      |             | 150.0016592 | 297.5536327 |
| 127.1168555   | 285.4011858   |             |             |             |
| NEMF          | NEMF          | 3636.498557 | 3374.328622 | 3457.801483 |
| 3506.217317   |               |             |             |             |
| MTAP          | MTAP          | 3726.082881 | 2149.780979 | 2835.597927 |
| 2939.337986   |               |             |             |             |
| MIR6889       | MIR6889       | 7.291747321 | 3.521344766 | 3.345180409 |
| 4.903800443   |               |             |             |             |
| TMEM57        | TMEM57        | 509.3806343 | 929.6350182 | 779.4270352 |
| 677.7052213   |               |             |             |             |
| LOC283194     | LOC283194     |             | 0           | 0.880336191 |
| 0             |               |             |             | 2.230120273 |
| MIR124-2HG    | MIR124-2HG    |             | 0           | 0           |
| LOC729970     | LOC729970     |             | 0           | 0           |
|               |               |             | 0           | 3.923040355 |
|               |               |             | 1.760672383 | 12.2656615  |
|               |               |             |             | 2.942280266 |
| OR2L13        | OR2L13        | 0           | 0           | 2.230120273 |
|               |               |             |             | 10.78836098 |

|             |             |             |             |             |
|-------------|-------------|-------------|-------------|-------------|
| REPIN1      | REPIN1      | 1960.438351 | 3141.039531 | 2672.799147 |
| 2710.820885 |             |             |             |             |
| AKAP8L      | AKAP8L      | 4571.92557  | 3532.789136 | 4930.795923 |
| 3843.598787 |             |             |             |             |
| QTRTD1      | QTRTD1      | 2803.156006 | 1782.680788 | 2733.012394 |
| 1906.597612 |             |             |             |             |
| LSM3        | LSM3        | 7965.713109 | 8071.802539 | 6264.407846 |
| 6524.99687  |             |             |             |             |
| MUS81       | MUS81       | 3195.868683 | 3496.695352 | 2189.978108 |
| 3281.623257 |             |             |             |             |
| HSPB6       | HSPB6       | 0           | 3.521344766 | 0           |
| 1.961520177 |             |             |             |             |
| ACPT        | ACPT        | 25.00027653 | 40.49546481 | 23.41626286 |
| 25.49976231 |             |             |             |             |
| CLPP        | CLPP        | 7414.665347 | 6641.256228 | 5332.217572 |
| 7170.337008 |             |             |             |             |
| MAT2A       | MAT2A       | 20451.26788 | 20407.95359 | 19660.74032 |
| 22710.48061 |             |             |             |             |
| ZDHHC11     | ZDHHC11     | 20.83356377 | 22.88874098 | 13.38072164 |
| 13.73064124 |             |             |             |             |
| AMHR2       | AMHR2       | 0           | 0           | 1.961520177 |
| 1.961520177 |             |             |             |             |
| GSTK1       | GSTK1       | 8875.098168 | 10905.60474 | 8300.507654 |
| 8380.594958 |             |             |             |             |
| C22orf46    | C22orf46    |             | 326.0452731 | 558.1331454 |
| 431.5282727 | 570.8023716 |             |             |             |
| FBX015      | FBX015      | 34.37538023 | 52.82017149 | 95.89517172 |
| 85.32612771 |             |             |             |             |
| TBC1D5      | TBC1D5      | 1865.645636 | 2970.25431  | 2425.255796 |
| 2650.99452  |             |             |             |             |
| BACH1       | BACH1       | 925.0102316 | 1312.581261 | 1843.194405 |
| 1402.486927 |             |             |             |             |
| IL2RA       | IL2RA       | 91439.55308 | 60314.47348 | 50125.29831 |
| 60777.70269 |             |             |             |             |
| GSPT1       | GSPT1       | 20729.39596 | 16392.74022 | 17661.4375  |
| 18198.98421 |             |             |             |             |
| EPHX4       | EPHX4       | 27.08363291 | 29.93143051 | 56.86806695 |
| 48.05724434 |             |             |             |             |
| CHPF2       | CHPF2       | 3103.159324 | 3869.957898 | 2806.606363 |
| 3291.430858 |             |             |             |             |
| C3orf58     | C3orf58     | 1014.594556 | 1329.307649 | 1202.034827 |
| 968.0102075 |             |             |             |             |
| PALM2-AKAP2 | PALM2-AKAP2 |             | 5329.225613 | 8304.211294 |
| 5218.481438 | 6271.960767 |             |             |             |
| METTL14     | METTL14     | 1966.68842  | 1612.775903 | 2492.159405 |
| 2270.459605 |             |             |             |             |
| HIST2H3C    | HIST2H3C    |             | 1.041678189 | 0           |
| 0           |             |             |             | 1.115060136 |
| AN08        | AN08        | 8.33342551  | 95.95664487 | 4.460240545 |
| 56.88408514 |             |             |             |             |
| ZNF704      | ZNF704      | 38.54209298 | 21.12806859 | 84.74457036 |
| 37.26888337 |             |             |             |             |

|             |          |             |             |             |
|-------------|----------|-------------|-------------|-------------|
| ZNF404      | ZNF404   | 2.083356377 | 10.5640343  | 31.22168382 |
| 13.73064124 |          |             |             |             |
| NOP2        | NOP2     | 11739.71319 | 6222.216201 | 11787.3007  |
| 10266.59661 |          |             |             |             |
| ZMAT3       | ZMAT3    | 591.6732112 | 648.8077731 | 1958.045599 |
| 675.7437011 |          |             |             |             |
| TMX1        | TMX1     | 11432.41812 | 9350.931025 | 8989.614819 |
| 8034.386646 |          |             |             |             |
| WNT3        | WNT3     | 0           | 5.282017149 | 8.92048109  |
| 12.74988115 |          |             |             |             |
| WWOX        | WWOX     | 590.631533  | 856.5671143 | 521.8481438 |
| 775.7812301 |          |             |             |             |
| PTP4A1      | PTP4A1   | 19647.09232 | 11550.89117 | 20131.2957  |
| 12431.13412 |          |             |             |             |
| DNALI1      | DNALI1   | 206.2522814 | 128.529084  | 118.1963744 |
| 158.8831344 |          |             |             |             |
| CDK11B      | CDK11B   | 1284.389207 | 1383.888493 | 1554.39383  |
| 1199.469588 |          |             |             |             |
| DPYSL3      | DPYSL3   | 0           | 5.282017149 | 0           |
| 0           |          |             |             |             |
| DPYSL2      | DPYSL2   | 3550.039267 | 4063.63186  | 1741.723933 |
| 2271.440365 |          |             |             |             |
| NEDD1       | NEDD1    | 6569.864336 | 6063.755687 | 5380.165157 |
| 6152.308036 |          |             |             |             |
| PHOSPH01    | PHOSPH01 |             | 22.91692015 | 45.77748195 |
| 13.38072164 |          |             |             |             |
| CEACAM21    | CEACAM21 |             | 1222.930194 | 1084.574188 |
| 1688.201046 |          |             |             |             |
| DDX17       | DDX17    | 1484.391419 | 2839.084217 | 2055.055831 |
| 2043.904025 |          |             |             |             |
| YPEL5       | YPEL5    | 2655.237703 | 2643.649583 | 7556.762543 |
| 4226.095222 |          |             |             |             |
| LANCL1      | LANCL1   | 4362.548254 | 5025.839317 | 3258.205718 |
| 4679.206383 |          |             |             |             |
| ZNF397      | ZNF397   | 248.9610871 | 251.7761508 | 792.8077569 |
| 495.2838448 |          |             |             |             |
| RBM28       | RBM28    | 2520.861217 | 1893.603148 | 2284.758219 |
| 2249.863643 |          |             |             |             |
| HIGD2B      | HIGD2B   | 1.041678189 | 3.521344766 | 6.690360818 |
| 9.807600887 |          |             |             |             |
| NPIPA7      | NPIPA7   | 1.041678189 | 0           | 4.460240545 |
| 1.961520177 |          |             |             |             |
| TMEM163     | TMEM163  | 33.33370204 | 49.29882672 | 6.690360818 |
| 0.980760089 |          |             |             |             |
| BTBD11      | BTBD11   | 987.5109229 | 2141.857954 | 2068.436553 |
| 1952.693337 |          |             |             |             |
| LTBP1       | LTBP1    | 20.83356377 | 62.50386959 | 0           |
| 21.57672195 |          |             |             |             |
| DID01       | DID01    | 3183.368545 | 4053.067825 | 4480.311628 |
| 3829.868146 |          |             |             |             |
| NDUFA11     | NDUFA11  | 5446.935249 | 6491.599076 | 4692.173053 |
| 4693.917784 |          |             |             |             |
| CDH11       | CDH11    | 8.33342551  | 0           | 0           |
| 0           |          |             |             |             |
| CEBPG       | CEBPG    | 4078.170109 | 3385.772992 | 5069.063379 |

|             |             |             |             |             |
|-------------|-------------|-------------|-------------|-------------|
| 3549.370761 |             |             |             |             |
| E2F6        | E2F6        | 1340.639829 | 1091.616877 | 1074.917971 |
| 1048.432535 |             |             |             |             |
| PHYHD1      | PHYHD1      | 16.66685102 | 4.401680957 | 10.03554123 |
| 6.865320621 |             |             |             |             |
| METTL15     | METTL15     | 1286.472563 | 1080.172507 | 983.4830402 |
| 1141.604743 |             |             |             |             |
| IKBKG       | IKBKG       | 1380.2236   | 1647.98935  | 1061.53725  |
| 1333.833721 |             |             |             |             |
| LARS2       | LARS2       | 2792.739224 | 3008.989102 | 2340.511226 |
| 2839.300457 |             |             |             |             |
| ESYT2       | ESYT2       | 10389.69825 | 12827.37865 | 7351.591478 |
| 10434.30658 |             |             |             |             |
| ZNF490      | ZNF490      | 955.218899  | 988.617543  | 1338.072164 |
| 796.377192  |             |             |             |             |
| MAU2        | MAU2        | 4351.089794 | 3315.346097 | 4309.707427 |
| 3405.199028 |             |             |             |             |
| NCSTN       | NCSTN       | 6906.326391 | 5869.201388 | 6110.529547 |
| 6430.843901 |             |             |             |             |
| EPT1        | EPT1        | 2313.567257 | 2563.538989 | 2096.313056 |
| 1917.385973 |             |             |             |             |
| EDAR        | EDAR        | 13.54181645 | 5.282017149 | 423.7228518 |
| 169.6714953 |             |             |             |             |
| STRA13      | STRA13      | 3508.37214  | 2483.428396 | 2551.257592 |
| 2532.322549 |             |             |             |             |
| WEE2        | WEE2        | 3.125034566 | 1.760672383 | 5.575300681 |
| 2.942280266 |             |             |             |             |
| C1orf177    | C1orf177    |             | 6.250069132 | 22.00840479 |
| 1.115060136 | 3.923040355 |             |             |             |
| MEF2BNB     | MEF2BNB     | 928.1352661 | 798.4649256 | 557.5300681 |
| 593.3598536 |             |             |             |             |
| TPGS2       | TPGS2       | 7150.079087 | 8965.343774 | 3558.156895 |
| 5702.139156 |             |             |             |             |
| VIPR1       | VIPR1       | 29.16698928 | 52.82017149 | 311.101778  |
| 306.9779078 |             |             |             |             |
| TRIM22      | TRIM22      | 7357.373047 | 3161.287263 | 44163.07176 |
| 15896.15952 |             |             |             |             |
| ARHGAP8     | ARHGAP8     | 3.125034566 | 16.72638764 | 64.6734879  |
| 48.05724434 |             |             |             |             |
| TNFRSF10D   | TNFRSF10D   |             | 185.4187176 | 88.03361914 |
| 778.3119751 | 382.4964346 |             |             |             |
| TP53INP2    | TP53INP2    |             | 312.5034566 | 547.5691111 |
| 69.13372845 | 196.1520177 |             |             |             |
| CCL22       | CCL22       | 978.1358192 | 330.1260718 | 11567.63385 |
| 1110.22042  |             |             |             |             |
| GPANK1      | GPANK1      | 1.041678189 | 0           | 2.230120273 |
| ST3GAL5     | ST3GAL5     | 467.7135067 | 859.2081228 | 2.942280266 |
| 630.628737  |             |             |             | 651.1951196 |
| MAFG-AS1    | MAFG-AS1    |             | 55.208944   | 44.89714576 |
| 91.43493117 | 80.42232727 |             |             |             |

|                 |              |             |             |   |
|-----------------|--------------|-------------|-------------|---|
| NOP14-AS1       | NOP14-AS1    | 1963.563386 | 1756.270702 |   |
| 2103.003417     | 2228.286921  |             |             |   |
| RNF216P1        | RNF216P1     | 1268.764034 | 1010.625948 |   |
| 1828.698623     | 1462.313292  |             |             |   |
| LOC100129534    | LOC100129534 | 1.041678189 | 12.32470668 | 0 |
| 23.53824213     |              |             |             |   |
| LINC00461       | LINC00461    | 5.208390943 | 2.641008574 | 0 |
| 0               |              |             |             |   |
| LOC148413       | LOC148413    | 2628.15407  | 2519.52218  |   |
| 2993.936466     | 2688.263403  |             |             |   |
| LINC-PINT       | LINC-PINT    | 1303.139414 | 830.1570285 |   |
| 2309.289542     | 1131.797142  |             |             |   |
| ZMIZ1-AS1       | ZMIZ1-AS1    | 3.125034566 | 15.84605145 |   |
| 7.805420954     | 16.67292151  |             |             |   |
| LINC00094       | LINC00094    | 1083.345316 | 1113.625282 |   |
| 1154.087241     | 1568.235382  |             |             |   |
| ANKRD36BP2      | ANKRD36BP2   | 4.166712755 | 14.96571525 |   |
| 104.8156528     | 47.07648426  |             |             |   |
| LINC00426       | LINC00426    | 267.7112945 | 500.9112929 |   |
| 191.7903434     | 207.9211388  |             |             |   |
| LINC00908       | LINC00908    | 0           | 1.760672383 | 0 |
| 9.807600887     |              |             |             |   |
| HSD17B14        | HSD17B14     | 3.125034566 | 13.20504287 |   |
| 129.3469758     | 25.49976231  |             |             |   |
| IFNA5 IFNA5     | 4.166712755  | 0           | 0           | 0 |
| YTHDF1 YTHDF1   | 5963.60763   | 5323.39295  | 6146.211471 |   |
| 4990.107331     |              |             |             |   |
| BTBD2 BTBD2     | 134.3764863  | 463.9371729 | 136.0373366 |   |
| 273.6320647     |              |             |             |   |
| PAK4 PAK4       | 88.54264604  | 294.9126241 | 139.382517  |   |
| 94.15296851     |              |             |             |   |
| MTERF2 MTERF2   | 391.670999   | 316.9210289 | 411.4571903 |   |
| 407.0154368     |              |             |             |   |
| CCDC66 CCDC66   | 1476.057993  | 804.627279  | 2009.338366 |   |
| 1238.699992     |              |             |             |   |
| C10TNF9B        | C10TNF9B     | 35.41705842 | 41.375801   |   |
| 23.41626286     | 27.46128248  |             |             |   |
| ESR1 ESR1       | 22.91692015  | 80.11059342 | 24.531323   |   |
| 41.19192372     |              |             |             |   |
| DEPDC1B DEPDC1B | 3945.876979  | 4213.289012 | 1671.475144 |   |
| 2482.303784     |              |             |             |   |
| TNIK TNIK       | 814.5923436  | 1829.338606 | 1013.589664 |   |
| 1123.951062     |              |             |             |   |
| LSM7 LSM7       | 3122.95121   | 3362.003915 | 2143.145582 |   |
| 2479.361504     |              |             |             |   |
| ENPP4 ENPP4     | 1501.05827   | 1456.956397 | 1455.153478 |   |
| 1288.718757     |              |             |             |   |
| GPALPP1 GPALPP1 | 1097.928811  | 1183.171841 | 953.3764165 |   |
| 1101.39358      |              |             |             |   |
| EVI2B EVI2B     | 1746.894322  | 2236.934262 | 2142.030522 |   |

|                 |               |             |               |  |
|-----------------|---------------|-------------|---------------|--|
| 1574.119942     |               |             |               |  |
| STRADB STRADB   | 2834.406351   | 1651.510695 | 2448.672059   |  |
| 2237.113762     |               |             |               |  |
| NARS NARS       | 14807.45545   | 10086.89208 | 14607.28779   |  |
| 11831.88971     |               |             |               |  |
| MAST3 MAST3     | 536.4642672   | 1217.504953 | 1253.327593   |  |
| 1058.240136     |               |             |               |  |
| ATP2A1 ATP2A1   | 85.41761147   | 131.1700925 | 55.75300681   |  |
| 58.84560532     |               |             |               |  |
| NOVA1 NOVA1     | 0 0.880336191 | 0           | 0             |  |
| ASCL1 ASCL1     | 0 1.760672383 | 0           | 15.69216142   |  |
| ARRB2 ARRB2     | 1858.353889   | 4518.765671 | 1126.210738   |  |
| 1386.794765     |               |             |               |  |
| FBX032 FBX032   | 609.3817404   | 1287.051512 | 1219.875789   |  |
| 1733.003077     |               |             |               |  |
| IL1RL1 IL1RL1   | 45.8338403    | 8.803361914 | 126.0017954   |  |
| 18.63444168     |               |             |               |  |
| ATXN7 ATXN7     | 904.1766678   | 1582.844472 | 1913.443194   |  |
| 1549.60094      |               |             |               |  |
| APOH APOH       | 2.083356377   | 1.760672383 | 0 0           |  |
| SLAMF6 SLAMF6   | 4294.839172   | 5244.162692 | 4426.788741   |  |
| 7697.005176     |               |             |               |  |
| SNORD114-27     | SNORD114-27   | 0 0         | 0 0.980760089 |  |
| SCARF1 SCARF1   | 15.62517283   | 16.72638764 | 55.75300681   |  |
| 55.90332505     |               |             |               |  |
| HHLA2 HHLA2     | 25.00027653   | 44.01680957 | 10.03554123   |  |
| 15.69216142     |               |             |               |  |
| HPS3 HPS3       | 3867.751115   | 3120.791799 | 3310.613545   |  |
| 3296.334658     |               |             |               |  |
| FPGS FPGS       | 5400.05973    | 5094.50554  | 3955.118303   |  |
| 5084.2603       |               |             |               |  |
| HRH1 HRH1       | 29.16698928   | 54.58084387 | 45.71746559   |  |
| 156.9216142     |               |             |               |  |
| RUFY1 RUFY1     | 2294.81705    | 2279.1904   | 1893.372111   |  |
| 2298.901648     |               |             |               |  |
| ARTN ARTN       | 0 0.880336191 | 0           | 0.980760089   |  |
| CTSC CTSC       | 26002.37095   | 16498.38056 | 9524.843684   |  |
| 10474.51775     |               |             |               |  |
| SLC25A25        | SLC25A25      | 950.0105081 | 1278.24815    |  |
| 1020.280025     | 866.0111583   |             |               |  |
| MLH1 MLH1       | 7737.585586   | 6955.536249 | 4998.814591   |  |
| 6655.437962     |               |             |               |  |
| SLC39A9 SLC39A9 | 4300.047563   | 4100.60598  | 3872.603853   |  |
| 3442.467911     |               |             |               |  |
| INAFM2 INAFM2   | 389.5876426   | 326.604727  | 532.9987451   |  |
| 381.5156745     |               |             |               |  |
| LOC283710       | LOC283710     | 0 0         | 0 3.923040355 |  |
| SLC29A2 SLC29A2 | 79.16754234   | 140.8537906 | 326.7126199   |  |
| 407.9961969     |               |             |               |  |
| SLC27A1 SLC27A1 | 119.7929917   | 212.1610221 | 238.6228692   |  |

|             |            |             |             |             |             |
|-------------|------------|-------------|-------------|-------------|-------------|
| 383.4771947 |            |             |             |             |             |
| LRRK2       | LRRK2      | 0           | 9.683698106 | 0           | 8.826840798 |
| ALAS1       | ALAS1      | 9025.099827 | 5837.509285 |             | 5199.525415 |
| 6218.018962 |            |             |             |             |             |
| PSMC2       | PSMC2      | 22279.4131  | 14856.55357 |             | 14567.14562 |
| 14262.21321 |            |             |             |             |             |
| GTF3C1      | GTF3C1     | 3646.915339 | 6155.310651 |             | 3267.126199 |
| 4479.131325 |            |             |             |             |             |
| ETFA        | ETFA       | 10317.82246 | 8484.680213 |             | 8127.673333 |
| 8679.726785 |            |             |             |             |             |
| BIVM-ERCC5  | BIVM-ERCC5 |             | 4601.092559 |             | 4571.585842 |
| 4698.863414 |            | 4538.95769  |             |             |             |
| GUK1        | GUK1       | 15103.29206 | 11615.15571 |             | 11815.1772  |
| 11370.93247 |            |             |             |             |             |
| FFAR3       | FFAR3      | 0           | 0           | 31.22168382 | 38.24964346 |
| THRAP3      | THRAP3     | 13943.90423 | 12464.68013 |             | 14050.87278 |
| 12740.07355 |            |             |             |             |             |
| HOXC4       | HOXC4      | 0           | 2.641008574 | 2.230120273 | 0           |
| ARFGAP3     | ARFGAP3    | 2673.98791  | 2645.410255 |             | 2997.281646 |
| 2728.474567 |            |             |             |             |             |
| PDPR        | PDPR       | 1118.762375 | 2854.930269 |             | 1306.85048  |
| 1758.502839 |            |             |             |             |             |
| SNX10       | SNX10      | 6278.194443 | 3759.035537 |             | 4030.942393 |
| 2876.56934  |            |             |             |             |             |
| TTC18       | TTC18      | 77.08418596 | 103.8796706 |             | 137.1523968 |
| 108.8643698 |            |             |             |             |             |
| SPAG5-AS1   | SPAG5-AS1  |             | 728.1330539 |             | 1289.69252  |
| 916.579432  |            | 956.2410865 |             |             |             |
| CHST7       | CHST7      | 708.3411683 | 595.1072654 |             | 486.1662194 |
| 507.0529658 |            |             |             |             |             |
| WSB1        | WSB1       | 5927.148894 | 4693.952573 |             | 6587.775285 |
| 6704.475966 |            |             |             |             |             |
| BHLHB9      | BHLHB9     | 128.1264172 | 160.2211868 |             | 197.3656441 |
| 157.9023743 |            |             |             |             |             |
| GGACT       | GGACT      | 235.4192706 | 284.3485898 |             | 320.0222591 |
| 325.6123494 |            |             |             |             |             |
| PNPT1       | PNPT1      | 9725.10757  | 5068.97579  |             | 8439.890171 |
| 6519.112309 |            |             |             |             |             |
| DAZAP2      | DAZAP2     | 30523.25429 | 27157.49117 |             | 31477.03259 |
| 26093.12216 |            |             |             |             |             |
| ATXN7L3B    | ATXN7L3B   |             | 3807.33378  |             | 4069.794213 |
| 4747.92606  |            | 4777.282392 |             |             |             |
| JHDM1D-AS1  | JHDM1D-AS1 |             | 377.0875043 |             | 382.9462433 |
| 196.250584  |            | 355.0351521 |             |             |             |
| SNX30       | SNX30      | 105.2094971 | 156.6998421 |             | 308.8716577 |
| 366.8042732 |            |             |             |             |             |
| ZKSCAN2     | ZKSCAN2    | 232.2942361 | 306.3569946 |             | 231.9325083 |
| 323.6508293 |            |             |             |             |             |
| GGA1        | GGA1       | 1948.979891 | 2459.659319 |             | 2297.023881 |
| 2312.632289 |            |             |             |             |             |

|              |              |             |             |             |
|--------------|--------------|-------------|-------------|-------------|
| FBX048       | FBX048       | 237.502627  | 279.0665727 | 223.0120273 |
| 212.8249392  |              |             |             |             |
| LIN52        | LIN52        | 2754.197131 | 2050.30299  | 1963.6209   |
| 1827.156045  |              |             |             |             |
| PLVAP        | PLVAP        | 0           | 3.345180409 | 0           |
| LOC101928489 | LOC101928489 |             | 89.58432423 | 62.50386959 |
| 35.68192436  |              | 26.48052239 |             |             |
| NOM02        | NOM02        | 2861.489984 | 2092.559127 | 2099.658237 |
| 1989.96222   |              |             |             |             |
| KSR2         | KSR2         | 5.208390943 | 0           | 49.062646   |
| ANKRD52      | ANKRD52      | 3566.706118 | 4475.629197 | 2725.206973 |
| 3131.566963  |              |             |             | 5.884560532 |
| B4GALNT3     | B4GALNT3     |             | 539.5893017 | 355.6558213 |
| 277.6499739  |              | 253.0361029 |             |             |
| LOC102724862 | LOC102724862 |             | 42.70880574 | 54.58084387 |
| 51.29276627  |              | 65.71092594 |             |             |
| BTBD17       | BTBD17       | 2.083356377 | 0           | 0           |
| C17orf98     | C17orf98     |             | 3.125034566 | 0           |
|              |              | 3.923040355 |             | 2.230120273 |
| NTRK2        | NTRK2        | 387.5042862 | 285.228926  | 617.7433155 |
| 228.5171007  |              |             |             |             |
| C1orf192     | C1orf192     |             | 13.54181645 | 19.36739621 |
| 7.805420954  |              | 7.846080709 |             |             |
| BCL2A1       | BCL2A1       | 590.631533  | 1118.026963 | 1751.759474 |
| 3505.236557  |              |             |             |             |
| ADAMTS18     | ADAMTS18     |             | 0           | 0.880336191 |
| 0            |              |             |             | 1.115060136 |
| TNFRSF1B     | TNFRSF1B     |             | 85623.86375 | 51061.25978 |
| 23455.28997  |              | 33431.16914 |             |             |
| ISOC1        | ISOC1        | 4241.713584 | 3271.329287 | 3518.01473  |
| 3780.830142  |              |             |             |             |
| FAHD2A       | FAHD2A       | 1277.097459 | 1128.590997 | 975.6776192 |
| 1070.009257  |              |             |             |             |
| KCNN1        | KCNN1        | 3.125034566 | 0           | 5.575300681 |
| DRAP1        | DRAP1        | 4208.379882 | 3596.173342 | 4637.535107 |
| 3671.965772  |              |             |             | 0           |
| TNFRSF1A     | TNFRSF1A     |             | 1345.84822  | 1786.202132 |
| 1566.659491  |              | 1775.17576  |             |             |
| KIF21A       | KIF21A       | 804.1755617 | 1125.069653 | 963.4119577 |
| 1352.468162  |              |             |             |             |
| GRID2        | GRID2        | 0           | 0           | 4.903800443 |
| ZNF358       | ZNF358       | 4.166712755 | 34.33311147 | 23.41626286 |
| 33.34584301  |              |             |             |             |
| NBPF14       | NBPF14       | 62.50069132 | 55.46118006 | 75.82408927 |
| 51.9802847   |              |             |             |             |
| ZSCAN30      | ZSCAN30      | 393.7543553 | 432.24507   | 538.5740458 |
| 672.8014208  |              |             |             |             |
| TMED1        | TMED1        | 2196.8993   | 2067.029377 | 1836.504044 |
| 1819.309964  |              |             |             |             |
| TYR03P       | TYR03P       | 0           | 0.880336191 | 0           |
|              |              |             |             | 0.980760089 |



|             |          |             |             |             |             |
|-------------|----------|-------------|-------------|-------------|-------------|
| OSTCP1      | OSTCP1   | 2.083356377 | 0           | 0           | 0.980760089 |
| RNF123      | RNF123   | 3340.661951 | 3143.68054  |             | 2725.206973 |
| 3009.952712 |          |             |             |             |             |
| HIST1H4J    | HIST1H4J |             | 72.91747321 |             | 45.77748195 |
| 26.76144327 |          | 31.38432284 |             |             |             |
| RGS9        | RGS9     | 387.5042862 | 442.8091043 |             | 76.9391494  |
| 215.7672195 |          |             |             |             |             |
| ISG20       | ISG20    | 5833.397857 | 4859.455777 |             | 13909.26014 |
| 6957.512069 |          |             |             |             |             |
| MAOA        | MAOA     | 70.83411683 | 14.08537906 |             | 133.8072164 |
| 42.17268381 |          |             |             |             |             |
| ILF2        | ILF2     | 31799.31007 | 24461.90175 |             | 26473.75776 |
| 27724.12619 |          |             |             |             |             |
| MEF2BNB     | MEF2BNB  | MEF2BNB     | 559.3811873 |             | 466.5781815 |
| 431.5282727 |          | 383.4771947 |             |             |             |
| MED13       | MED13    | 695.8410301 | 1633.023635 |             | 1203.149887 |
| 924.8567636 |          |             |             |             |             |
| MCHR1       | MCHR1    | 1.041678189 | 2.641008574 | 0           | 2.942280266 |
| UQCRQ       | UQCRQ    | 9795.941687 | 11537.68613 |             | 8323.923917 |
| 8322.730112 |          |             |             |             |             |
| FNBP1       | FNBP1    | 5919.857146 | 7076.142307 |             | 7021.533678 |
| 6827.070977 |          |             |             |             |             |
| DHX9        | DHX9     | 24491.93757 | 21431.78458 |             | 21488.32389 |
| 22353.48394 |          |             |             |             |             |
| DLGAP5      | DLGAP5   | 9690.732189 | 9807.825509 |             | 3670.777969 |
| 6718.206607 |          |             |             |             |             |
| NEDD8       | NEDD8    | 11881.38142 | 9370.298422 |             | 9437.868993 |
| 9341.739845 |          |             |             |             |             |
| ACIN1       | ACIN1    | 2201.066013 | 4174.55422  |             | 2312.634723 |
| 2273.401886 |          |             |             |             |             |
| SMCHD1      | SMCHD1   | 9273.019236 | 12374.88584 |             | 16363.5075  |
| 9844.86977  |          |             |             |             |             |
| COPS6       | COPS6    | 9978.23537  | 7000.433394 |             | 6632.377691 |
| 7893.157194 |          |             |             |             |             |
| FRYL        | FRYL     | 1689.602022 | 5090.103859 |             | 2344.971467 |
| 2242.998323 |          |             |             |             |             |
| RRAGB       | RRAGB    | 336.4620549 | 367.980528  |             | 518.5029634 |
| 402.1116364 |          |             |             |             |             |
| MIR25       | MIR25    | 31.25034566 | 21.12806859 |             | 28.99156354 |
| 21.57672195 |          |             |             |             |             |
| MIR24-2     | MIR24-2  | 4.166712755 | 3.521344766 |             | 1.115060136 |
| 2.942280266 |          |             |             |             |             |
| PAX2        | PAX2     | 0           | 3.521344766 | 1.115060136 | 0           |
| GTPBP2      | GTPBP2   | 423.9630228 | 966.6091382 |             | 456.0595957 |
| 468.8033224 |          |             |             |             |             |
| PEX2        | PEX2     | 4807.344841 | 3698.29234  |             | 3465.606904 |
| 3109.990241 |          |             |             |             |             |
| GPATCH11    | GPATCH11 |             | 1390.640382 |             | 1240.393694 |
| 1274.513736 |          | 1106.29738  |             |             |             |
| SIMC1       | SIMC1    | 1487.516453 | 1253.598737 |             | 1147.39688  |

|             |             |             |             |             |             |  |
|-------------|-------------|-------------|-------------|-------------|-------------|--|
| 1357.371963 |             |             |             |             |             |  |
| PIP         | PIP         | 0           | 0.880336191 | 0           | 0           |  |
| KANK1       | KANK1       | 1004.177774 | 227.1267374 | 1843.194405 |             |  |
| 218.7094998 |             |             |             |             |             |  |
| ADCK1       | ADCK1       | 379.1708607 | 223.6053926 | 415.9174308 |             |  |
| 460.9572417 |             |             |             |             |             |  |
| EIF2S1      | EIF2S1      | 17417.90099 | 11623.07874 | 14438.9137  |             |  |
| 13874.81297 |             |             |             |             |             |  |
| MEX3D       | MEX3D       | 4.166712755 | 24.64941336 | 5.575300681 |             |  |
| 2.942280266 |             |             |             |             |             |  |
| SH2D4A      | SH2D4A      | 178.1269703 | 181.3492554 | 220.781907  |             |  |
| 341.3045109 |             |             |             |             |             |  |
| ACKR2       | ACKR2       | 10.41678189 | 8.803361914 | 11.15060136 |             |  |
| 7.846080709 |             |             |             |             |             |  |
| CLDN3       | CLDN3       | 0           | 0.880336191 | 0           | 2.942280266 |  |
| ALOX12B     | ALOX12B     | 22.91692015 | 28.17075813 | 51.29276627 |             |  |
| 68.65320621 |             |             |             |             |             |  |
| ALOX5AP     | ALOX5AP     | 2415.65172  | 5367.409759 | 3500.173768 |             |  |
| 3475.813754 |             |             |             |             |             |  |
| NR4A3       | NR4A3       | 373.9624697 | 532.6033958 | 262.039132  |             |  |
| 591.3983335 |             |             |             |             |             |  |
| WDPCP       | WDPCP       | 198.960534  | 137.3324459 | 157.2234792 |             |  |
| 264.8052239 |             |             |             |             |             |  |
| FAM43A      | FAM43A      | 1283.347528 | 1769.475745 | 796.1529373 |             |  |
| 927.7990439 |             |             |             |             |             |  |
| TCTEX1D1    | TCTEX1D1    | 0           | 0.880336191 | 0           | 0           |  |
| RALGPS2     | RALGPS2     | 53.12558762 | 88.91395534 | 265.3843124 |             |  |
| 146.1332532 |             |             |             |             |             |  |
| SDHAF1      | SDHAF1      | 1021.886303 | 1021.189982 | 1220.990849 |             |  |
| 1075.893817 |             |             |             |             |             |  |
| ZNF408      | ZNF408      | 1138.55426  | 956.0451039 | 1081.608332 |             |  |
| 1025.875053 |             |             |             |             |             |  |
| C12orf49    | C12orf49    |             | 2527.111286 | 1971.072733 |             |  |
| 2323.785324 | 1770.27196  |             |             |             |             |  |
| FBX031      | FBX031      | 2385.443052 | 2073.191731 | 2991.706346 |             |  |
| 2499.957466 |             |             |             |             |             |  |
| KLHL36      | KLHL36      | 621.8818787 | 1325.786304 | 1159.662542 |             |  |
| 1541.754859 |             |             |             |             |             |  |
| SNORD116-19 | SNORD116-19 | 4.166712755 | 2.641008574 | 0           |             |  |
| 1.961520177 |             |             |             |             |             |  |
| LRRC28      | LRRC28      | 917.7184842 | 1291.453193 | 645.6198189 |             |  |
| 834.6268355 |             |             |             |             |             |  |
| FAM215A     | FAM215A     | 20.83356377 | 14.08537906 | 53.52288654 |             |  |
| 25.49976231 |             |             |             |             |             |  |
| TRA2B       | TRA2B       | 14833.49741 | 16143.60508 | 12444.07112 |             |  |
| 12593.9403  |             |             |             |             |             |  |
| NDUFA5      | NDUFA5      | 3709.41603  | 3899.889328 | 4143.563466 |             |  |
| 3860.271709 |             |             |             |             |             |  |
| BOLL        | BOLL        | 10.41678189 | 4.401680957 | 0           | 0           |  |
| ID2-AS1     | ID2-AS1     | 21.87524196 | 32.57243908 | 30.10662368 |             |  |

|              |              |             |             |  |             |
|--------------|--------------|-------------|-------------|--|-------------|
| 39.23040355  |              |             |             |  |             |
| PRKAR2A-AS1  | PRKAR2A-AS1  |             | 7.291747321 |  | 20.2477324  |
| 1.115060136  | 32.36508293  |             |             |  |             |
| LOC100506476 | LOC100506476 |             | 103.1261407 |  | 37.85445623 |
| 153.8782988  | 50.01876452  |             |             |  |             |
| LOC101927124 | LOC101927124 |             | 44.79216211 |  | 29.93143051 |
| 66.90360818  | 35.30736319  |             |             |  |             |
| SLC25A30     | SLC25A30     |             | 278.1280764 |  | 537.885413  |
| 357.9343037  | 219.6902599  |             |             |  |             |
| GOPC         | GOPC         |             | 2410.360492 |  | 2488.814224 |
| 2234.171482  |              |             |             |  |             |
| DTNBP1       | DTNBP1       | 1651.059929 | 1883.91945  |  | 1598.996235 |
| 1726.137756  |              |             |             |  |             |
| FAM188B      | FAM188B      | 78.12586415 | 92.4353001  |  | 110.3909535 |
| 126.5180514  |              |             |             |  |             |
| SLC19A2      | SLC19A2      | 1081.26196  | 993.8995601 |  | 434.8734531 |
| 668.8783805  |              |             |             |  |             |
| CACNA1A      | CACNA1A      | 31.25034566 | 23.76907717 |  | 56.86806695 |
| 53.94180488  |              |             |             |  |             |
| TMEM109      | TMEM109      | 11082.41425 | 9561.331375 |  | 9415.567791 |
| 9442.758134  |              |             |             |  |             |
| RETNLB       | RETNLB       | 0           | 4.460240545 |  | 0           |
| KIAA1324     | KIAA1324     |             | 2538.569746 |  | 1878.637433 |
| 1050.386648  | 1358.352723  |             |             |  |             |
| AHNAK        | AHNAK        | 5150.056965 | 9109.718909 |  | 3751.062298 |
| 4381.055316  |              |             |             |  |             |
| NUP37        | NUP37        | 5155.265356 | 4218.571029 |  | 3204.682832 |
| 3490.525156  |              |             |             |  |             |
| SMOX         | SMOX         | 918.7601624 | 868.0114848 |  | 292.1457557 |
| 658.0900195  |              |             |             |  |             |
| SYTL5        | SYTL5        | 0           | 4.401680957 |  | 5.884560532 |
| FAM60A       | FAM60A       | 7661.543078 | 7346.405518 |  | 8810.090137 |
| 8401.19092   |              |             |             |  |             |
| GLI1         | GLI1         | 12.50013826 | 34.33311147 |  | 1.115060136 |
| 16.67292151  |              |             |             |  |             |
| FGF22        | FGF22        | 1.041678189 | 0           |  | 0           |
| RET          | RET          | 22.91692015 | 182.2295916 |  | 0           |
| HIST2H2AA4   | HIST2H2AA4   |             | 1.041678189 |  | 67.67244612 |
| 2.230120273  | 0            |             |             |  | 7.042689532 |
| GLB1L3       | GLB1L3       | 114.5846008 | 247.3744698 |  | 49.062646   |
| 113.7681703  |              |             |             |  |             |
| EIF3H        | EIF3H        | 7430.29052  | 6771.545985 |  | 7517.735439 |
| 6428.882381  |              |             |             |  |             |
| CSGALNACT1   | CSGALNACT1   |             | 2626.070714 |  | 1716.655573 |
| 1105.024595  | 1086.682178  |             |             |  |             |
| TMEM255A     | TMEM255A     |             | 0           |  | 1.115060136 |
| COR01B       | COR01B       | 2247.941531 | 1788.843141 |  | 1530.977567 |
| 2524.476468  |              |             |             |  |             |
| LSM10        | LSM10        | 3607.331567 | 2736.965219 |  | 3042.999112 |
| 2650.01376   |              |             |             |  |             |

|              |              |               |               |               |
|--------------|--------------|---------------|---------------|---------------|
| CLUAP1       | CLUAP1       | 794.800458    | 780.8582018   | 1993.727524   |
| 1059.220896  |              |               |               |               |
| MRPL55       | MRPL55       | 2967.74116    | 2237.814599   | 2715.171432   |
| 2577.437513  |              |               |               |               |
| ASB14        | ASB14        | 198.960534    | 227.1267374   | 245.31323     |
| 224.5940603  |              |               |               |               |
| HIST1H3F     | HIST1H3F     |               | 45.8338403    | 114.4437049   |
| 18.95602232  |              | 44.13420399   |               |               |
| FAAH2        | FAAH2        | 548.9644054   | 1103.061248   | 1399.400471   |
| 1810.483124  |              |               |               |               |
| FAM9C        | FAM9C        | 3.125034566   | 0.880336191   | 0 7.846080709 |
| NDUFAF2      | NDUFAF2      | 811.467309    | 736.8413922   | 868.6318462   |
| 688.4935822  |              |               |               |               |
| PSORS1C2     | PSORS1C2     |               | 0 0           | 0 0.980760089 |
| MCTS2P       | MCTS2P       | 429.1714137   | 328.3653994   | 393.6162281   |
| 429.5729188  |              |               |               |               |
| LINC01480    | LINC01480    |               | 154.1683719   | 250.0154784   |
| 296.6059962  |              | 425.6498785   |               |               |
| LOC101929698 | LOC101929698 |               | 54.16726581   | 37.85445623   |
| 60.21324736  |              | 30.40356275   |               |               |
| FRAS1        | FRAS1        | 0 8.803361914 | 4.460240545   | 0             |
| EME1         | EME1         | 2223.982933   | 2415.642509   | 1357.028186   |
| 1881.09785   |              |               |               |               |
| ABHD14A-ACY1 | ABHD14A-ACY1 |               | 1929.188005   | 1566.118085   |
| 1904.522713  |              | 2474.457704   |               |               |
| HERC2P2      | HERC2P2      | 248.9610871   | 875.9345105   | 162.7987799   |
| 779.7042705  |              |               |               |               |
| MIR29B1      | MIR29B1      | 0 0           | 2.230120273   | 0.980760089   |
| MIR101-1     | MIR101-1     |               | 0 1.760672383 | 8.92048109    |
| 0.980760089  |              |               |               |               |
| ZNF667-AS1   | ZNF667-AS1   |               | 46.87551849   | 24.64941336   |
| 218.5517867  |              | 73.55700665   |               |               |
| G3BP1        | G3BP1        | 28994.0707    | 23126.43175   | 25883.89094   |
| 25348.72525  |              |               |               |               |
| SSBP3        | SSBP3        | 486.4637141   | 969.2501468   | 392.501168    |
| 392.3040355  |              |               |               |               |
| ZMAT2        | ZMAT2        | 1770.852921   | 2773.059003   | 2717.401552   |
| 2620.590957  |              |               |               |               |
| DCXR         | DCXR         | 3675.04065    | 3447.396526   | 3039.653931   |
| 3195.316369  |              |               |               |               |
| LCORL        | LCORL        | 1082.303638   | 969.2501468   | 836.2951022   |
| 833.6460754  |              |               |               |               |
| TMEM147      | TMEM147      | 3490.66361    | 3442.114509   | 3472.297264   |
| 3747.484299  |              |               |               |               |
| RBM39        | RBM39        | 13840.77809   | 12733.18267   | 14137.84747   |
| 14561.34504  |              |               |               |               |
| TRAM1L1      | TRAM1L1      | 0 1.760672383 | 0             | 0             |
| C4orf32      | C4orf32      | 1570.850709   | 1061.685447   | 2411.875075   |
| 1529.004978  |              |               |               |               |
| DCLRE1A      | DCLRE1A      | 3046.908702   | 2873.417329   | 1781.866098   |

|                 |              |              |             |   |  |
|-----------------|--------------|--------------|-------------|---|--|
| 2330.285971     |              |              |             |   |  |
| CELF1 CELF1     | 9470.938092  | 9117.641935  | 9463.515376 |   |  |
| 10143.02084     |              |              |             |   |  |
| ZRANB2-AS1      | ZRANB2-AS1   | 931.2603007  | 855.6867781 |   |  |
| 830.7198015     | 1019.990492  |              |             |   |  |
| CLN5 CLN5       | 1380.2236    | 912.9086305  | 1999.302824 |   |  |
| 1424.063649     |              |              |             |   |  |
| LOC440896       | LOC440896    | 0 0          | 16.72590204 | 0 |  |
| RPL32P3 RPL32P3 | 178.1269703  | 219.2037117  | 233.0475685 |   |  |
| 242.2477419     |              |              |             |   |  |
| CCT6P1 CCT6P1   | 252.0861217  | 235.9300993  | 372.4300855 |   |  |
| 329.5353898     |              |              |             |   |  |
| LOC100289361    | LOC100289361 | 23.95859834  | 51.93983529 |   |  |
| 13.38072164     | 35.30736319  |              |             |   |  |
| SDC4 SDC4       | 2710.446647  | 5404.383879  | 1727.228151 |   |  |
| 3004.068152     |              |              |             |   |  |
| AZGP1 AZGP1     | 0 0          | 3.345180409  | 0           |   |  |
| COL8A1 COL8A1   | 0 0          | 1.115060136  | 1.961520177 |   |  |
| ATR ATR         | 1883.354165  | 3153.364238  | 2381.768451 |   |  |
| 2505.842027     |              |              |             |   |  |
| GNB4 GNB4       | 706.2578119  | 1457.836733  | 238.6228692 |   |  |
| 333.4584301     |              |              |             |   |  |
| US01 US01       | 6827.158849  | 6400.044112  | 5390.200699 |   |  |
| 6152.308036     |              |              |             |   |  |
| NR1H3 NR1H3     | 551.0477618  | 458.6551557  | 408.1120099 |   |  |
| 390.3425153     |              |              |             |   |  |
| FANCM FANCM     | 1620.851262  | 1422.623285  | 1165.237842 |   |  |
| 1231.834671     |              |              |             |   |  |
| ABR ABR         | 2030.23079   | 3750.232176  | 1936.859457 |   |  |
| 2824.589055     |              |              |             |   |  |
| LOC101927599    | LOC101927599 | 85.41761147  | 117.0847135 |   |  |
| 83.62951022     | 68.65320621  |              |             |   |  |
| KRT81 KRT81     | 5.208390943  | 0 0          | 0           |   |  |
| TRDMT1 TRDMT1   | 787.5087107  | 537.0050768  | 559.7601884 |   |  |
| 513.9182865     |              |              |             |   |  |
| C5AR1 C5AR1     | 1.041678189  | 0 8.92048109 | 8.826840798 |   |  |
| STARD7 STARD7   | 35599.3521   | 26614.32374  | 31516.05969 |   |  |
| 30756.63638     |              |              |             |   |  |
| ETS2 ETS2       | 3554.20598   | 2399.796458  | 3701.999652 |   |  |
| 2556.841551     |              |              |             |   |  |
| POLR3C POLR3C   | 4017.752774  | 2854.049933  | 4337.58393  |   |  |
| 3458.160073     |              |              |             |   |  |
| ZNF181 ZNF181   | 321.8785603  | 292.2716156  | 1539.898048 |   |  |
| 688.4935822     |              |              |             |   |  |
| WDR62 WDR62     | 1684.393631  | 2575.863696  | 905.4288306 |   |  |
| 1124.931822     |              |              |             |   |  |
| FERMT3 FERMT3   | 23945.05652  | 16068.7765   | 13369.57103 |   |  |
| 18677.59513     |              |              |             |   |  |
| SNX29P1 SNX29P1 | 0 0          | 1.115060136  | 0.980760089 |   |  |
| TRIM16L TRIM16L | 12.50013826  | 24.64941336  | 46.83252572 |   |  |

|             |            |             |             |             |             |
|-------------|------------|-------------|-------------|-------------|-------------|
| 33.34584301 |            |             |             |             |             |
| FEZ1        | FEZ1       | 37.50041479 | 86.27294676 | 66.90360818 |             |
| 167.7099752 |            |             |             |             |             |
| ABCA10      | ABCA10     | 2.083356377 | 0.880336191 | 3.345180409 |             |
| 0.980760089 |            |             |             |             |             |
| LY9         | LY9        | 73.9591514  | 136.4521097 | 2882.430452 |             |
| 1408.371487 |            |             |             |             |             |
| TFPI        | TFPI       | 50.00055306 | 94.19597248 | 0           | 21.57672195 |
| ERVMER34-1  | ERVMER34-1 | 0           | 0           | 0           | 6.865320621 |
| TREML1      | TREML1     | 0           | 0           | 33.45180409 | 4.903800443 |
| GSDMA       | GSDMA      | 61.45901313 | 69.54655912 | 51.29276627 |             |
| 190.2674572 |            |             |             |             |             |
| MAPK7       | MAPK7      | 473.9635759 | 681.3802122 | 508.4674221 |             |
| 509.9952461 |            |             |             |             |             |
| ATRNL       | ATRNL      | 593.7565676 | 926.1136734 | 461.6348964 |             |
| 688.4935822 |            |             |             |             |             |
| FUT8        | FUT8       | 9661.5652   | 8865.865784 | 4175.90021  |             |
| 4607.610897 |            |             |             |             |             |
| KLHL8       | KLHL8      | 1986.480306 | 1905.047518 | 2232.350393 |             |
| 1870.309489 |            |             |             |             |             |
| NOG         | NOG        | 0           | 0           | 56.86806695 | 16.67292151 |
| ATAD3A      | ATAD3A     | 4731.302333 | 3658.677212 | 3237.019576 |             |
| 3691.580974 |            |             |             |             |             |
| HORMAD1     | HORMAD1    | 1.041678189 | 0           | 13.38072164 | 0.980760089 |
| KCNQ2       | KCNQ2      | 0           | 1.760672383 | 0           | 20.59596186 |
| GCGR        | GCGR       | 0           | 0           | 0           | 6.865320621 |
| F5          | F5         | 3867.751115 | 5569.887083 | 2259.111836 |             |
| 9287.79804  |            |             |             |             |             |
| TMEM50B     | TMEM50B    | 2658.362738 | 1953.466009 | 3936.162281 |             |
| 2777.512571 |            |             |             |             |             |
| BIN3        | BIN3       | 2892.74033  | 2129.533247 | 1970.311261 |             |
| 2090.980509 |            |             |             |             |             |
| CMAS        | CMAS       | 6239.65235  | 3914.855043 | 4009.75625  |             |
| 4651.745101 |            |             |             |             |             |
| METTL18     | METTL18    | 856.2594711 | 874.1738381 | 989.0583409 |             |
| 1122.970302 |            |             |             |             |             |
| ZNF622      | ZNF622     | 4883.387349 | 3543.353171 | 4159.174308 |             |
| 4200.59546  |            |             |             |             |             |
| EPHB1       | EPHB1      | 229.1692015 | 185.7509364 | 60.21324736 |             |
| 70.61472638 |            |             |             |             |             |
| MPRIP       | MPRIP      | 2248.983209 | 2725.520849 | 1509.791425 |             |
| 1809.502364 |            |             |             |             |             |
| ITGB5       | ITGB5      | 15.62517283 | 35.21344766 | 41.25722504 |             |
| 69.6339663  |            |             |             |             |             |
| GGT1        | GGT1       | 5690.687945 | 3575.045273 | 1635.79322  |             |
| 1994.86602  |            |             |             |             |             |
| NUP43       | NUP43      | 1360.431714 | 2055.585007 | 1418.356493 |             |
| 1682.984312 |            |             |             |             |             |
| SETD9       | SETD9      | 514.5890252 | 468.3388538 | 646.734879  |             |
| 543.3410891 |            |             |             |             |             |

|             |             |             |             |             |
|-------------|-------------|-------------|-------------|-------------|
| WDR36       | WDR36       | 7167.787616 | 6286.480743 | 7592.444468 |
| 7723.485698 |             |             |             |             |
| CELA2A      | CELA2A      | 0           | 0.880336191 | 0           |
| 2.942280266 |             |             |             |             |
| SLC47A2     | SLC47A2     | 4.166712755 | 1.760672383 | 11.15060136 |
| 5.884560532 |             |             |             |             |
| SNX21       | SNX21       | 585.423142  | 617.9960064 | 491.7415201 |
| 559.0332505 |             |             |             |             |
| UHRF2       | UHRF2       | 2569.820092 | 3447.396526 | 2362.812429 |
| 2659.82136  |             |             |             |             |
| FNIP2       | FNIP2       | 1360.431714 | 1367.162105 | 2078.472094 |
| 2177.287397 |             |             |             |             |
| PERM1       | PERM1       | 3.125034566 | 5.282017149 | 8.92048109  |
| 5.884560532 |             |             |             |             |
| CCDC173     | CCDC173     | 3.125034566 | 2.641008574 | 4.460240545 |
| 9.807600887 |             |             |             |             |
| NXPE3       | NXPE3       | 3143.784773 | 2814.434804 | 4321.973088 |
| 3601.351046 |             |             |             |             |
| MIR4461     | MIR4461     | 0           | 0           | 1.115060136 |
| 0           |             |             |             |             |
| MIR4458     | MIR4458     | 7.291747321 | 3.521344766 | 6.690360818 |
| 1.961520177 |             |             |             |             |
| EBLN2       | EBLN2       | 105.2094971 | 104.7600068 | 81.39938995 |
| 70.61472638 |             |             |             |             |
| SAMD4B      | SAMD4B      | 1025.011338 | 1559.075395 | 1232.141451 |
| 1283.814956 |             |             |             |             |
| GOLGA3      | GOLGA3      | 1645.851538 | 2300.318468 | 1935.744397 |
| 1411.313768 |             |             |             |             |
| TAF5L       | TAF5L       | 231.2525579 | 1054.642757 | 347.8987625 |
| 272.6513047 |             |             |             |             |
| GPD1L       | GPD1L       | 1715.643977 | 1594.288843 | 1371.523968 |
| 1115.124221 |             |             |             |             |
| LGALS14     | LGALS14     | 5.208390943 | 14.08537906 | 23.41626286 |
| 33.34584301 |             |             |             |             |
| CEP135      | CEP135      | 1553.142179 | 1497.451862 | 1422.816734 |
| 1415.236808 |             |             |             |             |
| CCDC28A     | CCDC28A     | 1880.229131 | 1750.108349 | 2072.896793 |
| 1668.272911 |             |             |             |             |
| GRB7        | GRB7        | 15.62517283 | 15.84605145 | 26.76144327 |
| 39.23040355 |             |             |             |             |
| PIP5KL1     | PIP5KL1     | 2.083356377 | 8.803361914 | 13.38072164 |
| 25.49976231 |             |             |             |             |
| AP5Z1       | AP5Z1       | 3103.159324 | 2081.114757 | 2805.491303 |
| 2458.765542 |             |             |             |             |
| SV2A        | SV2A        | 106.2511752 | 322.2030461 | 253.1186509 |
| 460.9572417 |             |             |             |             |
| RQCD1       | RQCD1       | 8415.718086 | 6614.846142 | 6189.698816 |
| 4644.87978  |             |             |             |             |
| SNORA43     | SNORA43     | 5.208390943 | 11.44437049 | 13.38072164 |
| 11.76912106 |             |             |             |             |
| SNORA80E    | SNORA80E    |             | 9.375103698 | 18.48706002 |
| 12.2656615  | 10.78836098 |             |             |             |

|                       |             |               |               |
|-----------------------|-------------|---------------|---------------|
| RFPL1S RFPL1S         | 13.54181645 | 0.880336191   | 1.115060136   |
| 8.826840798           |             |               |               |
| SNORA40 SNORA40       | 54.16726581 | 33.45277527   | 39.02710477   |
| 57.86484523           |             |               |               |
| ALOX12P2 ALOX12P2     |             | 64.5840477    | 64.26454197   |
| 27.87650341           | 19.61520177 |               |               |
| TMEM127 TMEM127       | 5379.226166 | 4377.91188    | 4948.636885   |
| 4701.763865           |             |               |               |
| SNORD72 SNORD72       | 1.041678189 | 7.923025723   | 0 4.903800443 |
| SNORD74 SNORD74       | 14.58349464 | 14.08537906   | 15.61084191   |
| 9.807600887           |             |               |               |
| HINFP HINFP           | 1822.93683  | 1586.365817   | 1935.744397   |
| 1888.943931           |             |               |               |
| FKBP7 FKBP7           | 139.5848773 | 231.5284183   | 119.3114346   |
| 226.5555805           |             |               |               |
| HIST1H1B HIST1H1B     |             | 859.3845057   | 1389.17051    |
| 395.8463484           | 374.6503539 |               |               |
| TTC33 TTC33           | 1616.684549 | 1890.081803   | 1629.102859   |
| 1737.906877           |             |               |               |
| HIST1H1D HIST1H1D     |             | 1701.060482   | 3580.327291   |
| 1716.07755            | 1308.333958 |               |               |
| HIST1H1C HIST1H1C     |             | 1521.891834   | 2919.194811   |
| 1470.76432            | 1197.508068 |               |               |
| PPP2R5B PPP2R5B       | 436.4631611 | 560.7741539   | 589.8668121   |
| 558.0524905           |             |               |               |
| PSMG3-AS1 PSMG3-AS1   |             | 446.879943    | 408.4759928   |
| 327.8276801           | 349.1505916 |               |               |
| CSNK1A1P1 CSNK1A1P1   |             | 0 6.16235334  | 5.575300681   |
| 0.980760089           |             |               |               |
| LINC01126 LINC01126   |             | 7.291747321   | 22.88874098   |
| 1.115060136           | 3.923040355 |               |               |
| GCSAML-AS1 GCSAML-AS1 |             | 0 2.641008574 | 1.115060136   |
| 0                     |             |               |               |
| TJAP1 TJAP1           | 854.1761147 | 964.8484658   | 821.7993204   |
| 858.1650776           |             |               |               |
| ZNF524 ZNF524         | 908.3433805 | 961.327121    | 642.2746385   |
| 691.4358625           |             |               |               |
| FBLN7 FBLN7           | 1232.305297 | 488.5865862   | 1703.811888   |
| 1986.03918            |             |               |               |
| ARHGEF19 ARHGEF19     |             | 590.631533    | 309.8783394   |
| 496.2017606           | 425.6498785 |               |               |
| KIF5B KIF5B           | 11464.71014 | 9786.69744    | 10560.73455   |
| 8699.341986           |             |               |               |
| NEURL4 NEURL4         | 237.502627  | 492.9882672   | 366.8547848   |
| 305.0163876           |             |               |               |
| TCFL5 TCFL5           | 54.16726581 | 130.2897563   | 200.7108245   |
| 212.8249392           |             |               |               |
| TCAP TCAP             | 14.58349464 | 1.760672383   | 3.345180409   |
| 1.961520177           |             |               |               |
| SRSF2 SRSF2           | 25147.15315 | 21370.16105   | 20047.66619   |



|                   |                   |             |             |             |             |
|-------------------|-------------------|-------------|-------------|-------------|-------------|
| 21640.47136       |                   |             |             |             |             |
| RFC4              | RFC4              | 6142.776279 | 5446.640016 | 3734.336396 |             |
| 4796.897594       |                   |             |             |             |             |
| SMARCC1           | SMARCC1           | 8782.388809 | 11348.41384 | 7109.623429 |             |
| 9559.468584       |                   |             |             |             |             |
| LOC100093631      | LOC100093631      |             | 138.5431991 | 182.2295916 |             |
| 119.3114346       |                   | 135.3448922 |             |             |             |
| ACTN3             | ACTN3             | 6.250069132 | 11.44437049 | 28.99156354 |             |
| 15.69216142       |                   |             |             |             |             |
| GCH1              | GCH1              | 8348.009004 | 7556.805867 | 6162.937373 |             |
| 4029.943204       |                   |             |             |             |             |
| CHAC1             | CHAC1             | 182.293683  | 176.0672383 | 774.9667947 |             |
| 229.4978607       |                   |             |             |             |             |
| METTL22           | METTL22           | 826.0508036 | 768.5334951 | 724.7890886 |             |
| 710.0703042       |                   |             |             |             |             |
| FBXW12            | FBXW12            | 0           | 0           | 3.923040355 |             |
| LRP3              | LRP3              | 0           | 4.401680957 | 6.690360818 | 4.903800443 |
| LRRC29            | LRRC29            | 82.29257691 | 66.02521436 | 91.43493117 |             |
| 93.17220842       |                   |             |             |             |             |
| PTPRK             | PTPRK             | 958.3439336 | 501.7916291 | 1316.886021 |             |
| 375.631114        |                   |             |             |             |             |
| MAPK8             | MAPK8             | 758.3417214 | 1357.478407 | 754.8957123 |             |
| 797.3579521       |                   |             |             |             |             |
| IRF1              | IRF1              | 16688.72626 | 14539.63254 | 33208.72098 |             |
| 19772.12339       |                   |             |             |             |             |
| ITGA9             | ITGA9             | 31.25034566 | 166.3835402 | 2.230120273 |             |
| 32.36508293       |                   |             |             |             |             |
| TNRC18            | TNRC18            | 113.5429226 | 331.8867442 | 130.4620359 |             |
| 168.6907353       |                   |             |             |             |             |
| ARID4B            | ARID4B            | 3696.915892 | 3613.780066 | 6839.778876 |             |
| 5097.010181       |                   |             |             |             |             |
| GINS2             | GINS2             | 6841.742343 | 6255.668976 | 3753.292419 |             |
| 4995.991892       |                   |             |             |             |             |
| MIR3648-1         | MIR3648-1         |             | 4.166712755 | 22.88874098 |             |
| 25.64638313       |                   | 7.846080709 |             |             |             |
| LINC01094         | LINC01094         |             | 1.041678189 | 0           | 0           |
| OR1J4             | OR1J4             | 0           | 0           | 1.961520177 | 0           |
| TRAPPC5           | TRAPPC5           | 2270.858451 | 2178.832074 | 1829.813684 |             |
| 1867.367209       |                   |             |             |             |             |
| ANKRD62P1-PARP4P3 | ANKRD62P1-PARP4P3 |             |             | 0           | 0           |
| 2.230120273       |                   | 1.961520177 |             |             |             |
| ARPC5             | ARPC5             | 43156.72736 | 39169.6785  | 23105.16108 |             |
| 30276.06394       |                   |             |             |             |             |
| UBL4A             | UBL4A             | 6277.152765 | 5239.761011 | 5142.657348 |             |
| 5567.775023       |                   |             |             |             |             |
| CBY1              | CBY1              | 415.6295973 | 292.2716156 | 527.4234445 |             |
| 447.2266004       |                   |             |             |             |             |
| AIMP1             | AIMP1             | 3690.665823 | 2832.041528 | 3623.945443 |             |
| 3317.91138        |                   |             |             |             |             |
| TMF1              | TMF1              | 5089.63963  | 3904.291009 | 4426.788741 |             |

|             |           |             |             |             |
|-------------|-----------|-------------|-------------|-------------|
| 3654.31209  |           |             |             |             |
| JAK1        | JAK1      | 23551.30217 | 25306.14416 | 26171.57646 |
| 26387.35019 |           |             |             |             |
| C10orf32    | C10orf32  |             | 1065.636787 | 1095.138222 |
| 1063.76737  |           | 848.3574767 |             |             |
| RBM4        | RBM4      | 7506.333028 | 6582.273703 | 7911.351667 |
| 7930.426077 |           |             |             |             |
| FAM24B      | FAM24B    | 136.4598427 | 207.7593412 | 132.6921562 |
| 216.7479796 |           |             |             |             |
| PGC         | PGC       | 0           | 0           | 10.03554123 |
| HAUS7       | HAUS7     | 2373.984592 | 1766.834736 | 1883.33657  |
| 2090.980509 |           |             |             |             |
| HSP90AB4P   | HSP90AB4P |             | 11.45846008 | 22.88874098 |
| 14.49578177 |           | 3.923040355 |             |             |
| UGDH        | UGDH      | 2597.945403 | 2432.368897 | 4038.747814 |
| 3073.702118 |           |             |             |             |
| MTF2        | MTF2      | 7101.120212 | 6643.897237 | 4817.059789 |
| 5362.796165 |           |             |             |             |
| CCNL2       | CCNL2     | 3957.335439 | 3954.470172 | 3676.353269 |
| 4484.035125 |           |             |             |             |
| GST02       | GST02     | 30.20866747 | 21.12806859 | 86.97469063 |
| 56.88408514 |           |             |             |             |
| CCNI2       | CCNI2     | 1041.678189 | 277.3059003 | 704.7180061 |
| 407.0154368 |           |             |             |             |
| ARHGAP9     | ARHGAP9   | 5803.189189 | 6108.652832 | 3389.782814 |
| 5548.159822 |           |             |             |             |
| TMED6       | TMED6     | 26.04195472 | 10.5640343  | 23.41626286 |
| 37.26888337 |           |             |             |             |
| GSG1L       | GSG1L     | 0           | 2.641008574 | 0           |
| CEP152      | CEP152    | 2730.238533 | 3016.912128 | 1462.958899 |
| 2284.190247 |           |             |             |             |
| SCYL2       | SCYL2     | 3585.456326 | 3619.942419 | 4040.977934 |
| 2877.5501   |           |             |             |             |
| SEC23IP     | SEC23IP   | 8534.4694   | 7135.124832 | 6255.487364 |
| 7062.453398 |           |             |             |             |
| ARR3        | ARR3      | 8.33342551  | 21.12806859 | 16.72590204 |
| 19.61520177 |           |             |             |             |
| MRPL57      | MRPL57    | 4997.971949 | 5361.247406 | 4349.849592 |
| 4791.013033 |           |             |             |             |
| ACAT1       | ACAT1     | 10270.94694 | 7388.661655 | 5709.107898 |
| 6637.78428  |           |             |             |             |
| PPFIBP1     | PPFIBP1   | 661.4656498 | 433.1254062 | 340.0933416 |
| 208.9018989 |           |             |             |             |
| TIAF1       | TIAF1     | 448.9632993 | 785.2598828 | 488.3963397 |
| 468.8033224 |           |             |             |             |
| FNBP4       | FNBP4     | 3273.994547 | 3808.334364 | 4828.21039  |
| 3570.947483 |           |             |             |             |
| MTG1        | MTG1      | 2944.824239 | 2757.212952 | 2172.137145 |
| 3235.527533 |           |             |             |             |
| TMEM79      | TMEM79    | 579.1730729 | 523.8000339 | 801.728238  |

|             |           |             |             |             |             |
|-------------|-----------|-------------|-------------|-------------|-------------|
| 674.762941  |           |             |             |             |             |
| PRPF19      | PRPF19    | 542.7143363 | 1697.288177 | 683.5318635 |             |
| 682.6090217 |           |             |             |             |             |
| LINC00521   | LINC00521 |             | 1.041678189 | 3.521344766 | 0           |
| 0           |           |             |             |             |             |
| POPDC3      | POPDC3    | 6.250069132 | 16.72638764 | 1.115060136 |             |
| 18.63444168 |           |             |             |             |             |
| SPACA6P     | SPACA6P   | 8.33342551  | 14.96571525 | 50.17770613 |             |
| 34.3266031  |           |             |             |             |             |
| HINT1       | HINT1     | 19613.75862 | 19899.99961 | 14923.96486 |             |
| 14092.54171 |           |             |             |             |             |
| GHRL0S      | GHRL0S    | 166.6685102 | 275.5452279 | 126.0017954 |             |
| 156.9216142 |           |             |             |             |             |
| KBTBD4      | KBTBD4    | 4296.922528 | 3633.147462 | 4232.768277 |             |
| 3927.944155 |           |             |             |             |             |
| RNF135      | RNF135    | 759.3833996 | 703.388617  | 703.602946  |             |
| 975.8562882 |           |             |             |             |             |
| NUDT9       | NUDT9     | 947.9271517 | 724.5166856 | 1456.268538 |             |
| 1169.066026 |           |             |             |             |             |
| FAM217A     | FAM217A   | 0           | 0.880336191 | 7.805420954 | 0.980760089 |
| TMEM132D    | TMEM132D  |             | 0           | 0           | 2.942280266 |
| GRIN3A      | GRIN3A    | 5.208390943 | 7.042689532 | 25.64638313 | 0           |
| AMOTL1      | AMOTL1    | 103.1261407 | 335.4080889 | 81.39938995 |             |
| 109.8451299 |           |             |             |             |             |
| RNF152      | RNF152    | 0           | 0           | 10.03554123 | 0           |
| CCDC83      | CCDC83    | 2.083356377 | 0           | 8.92048109  | 0.980760089 |
| TYSND1      | TYSND1    | 948.9688299 | 1004.463594 | 1362.603487 |             |
| 1591.773624 |           |             |             |             |             |
| CCDC171     | CCDC171   | 88.54264604 | 126.7684116 | 168.3740806 |             |
| 157.9023743 |           |             |             |             |             |
| LBH         | LBH       | 6949.035197 | 10520.01749 | 12461.91208 |             |
| 13874.81297 |           |             |             |             |             |
| TRIM8       | TRIM8     | 2634.404139 | 3259.884917 | 1958.045599 |             |
| 2523.495708 |           |             |             |             |             |
| EXOSC6      | EXOSC6    | 3536.497451 | 2199.079806 | 2890.235873 |             |
| 3017.798793 |           |             |             |             |             |
| YTHDC2      | YTHDC2    | 1956.271638 | 2084.636101 | 1973.656441 |             |
| 2107.653431 |           |             |             |             |             |
| TES         | TES       | 10941.78769 | 8719.729976 | 8881.453985 |             |
| 7302.73962  |           |             |             |             |             |
| ZNF441      | ZNF441    | 404.1711372 | 517.6376806 | 1717.19261  |             |
| 1128.854862 |           |             |             |             |             |
| DHDH        | DHDH      | 32.29202385 | 29.93143051 | 50.17770613 |             |
| 35.30736319 |           |             |             |             |             |
| LRRC8D      | LRRC8D    | 2921.907319 | 2788.905054 | 4258.41466  |             |
| 3510.140357 |           |             |             |             |             |
| HNRNPDL     | HNRNPDL   | 11105.33117 | 9773.492397 | 13581.43246 |             |
| 12377.19232 |           |             |             |             |             |
| ELM02       | ELM02     | 7901.129061 | 5990.687783 | 6649.103593 |             |
| 6441.632262 |           |             |             |             |             |

|                 |              |             |             |             |   |
|-----------------|--------------|-------------|-------------|-------------|---|
| RBAK-RBAKDN     | RBAK-RBAKDN  | 125.0013826 | 163.7425316 |             |   |
| 219.6668468     | 176.536816   |             |             |             |   |
| TACR2 TACR2     | 6.250069132  | 0           | 4.460240545 | 2.942280266 |   |
| RGS22 RGS22     | 0            | 1.760672383 | 0           | 0           |   |
| LOC644656       | LOC644656    | 69.79243864 | 111.8026963 |             |   |
| 92.54999131     | 47.07648426  |             |             |             |   |
| LOC100287632    | LOC100287632 | 0           | 0           | 1.115060136 | 0 |
| ZFP37 ZFP37     | 79.16754234  | 37.85445623 | 211.8614259 |             |   |
| 103.9605694     |              |             |             |             |   |
| LOC100129055    | LOC100129055 | 0           | 0           | 14.49578177 | 0 |
| KCNJ2-AS1       | KCNJ2-AS1    | 2.083356377 | 0           | 0           | 0 |
| PTPN22 PTPN22   | 10957.41287  | 9650.245331 | 5115.895905 |             |   |
| 6799.609695     |              |             |             |             |   |
| CES3 CES3       | 61.45901313  | 42.25613719 | 31.22168382 |             |   |
| 28.44204257     |              |             |             |             |   |
| CFI CFI         | 15.62517283  | 23.76907717 | 0           | 24.51900222 |   |
| THOC7-AS1       | THOC7-AS1    | 0           | 8.803361914 | 0           |   |
| 0.980760089     |              |             |             |             |   |
| CTBP1-AS        | CTBP1-AS     | 2213.566151 | 3118.15079  |             |   |
| 2174.367266     | 2746.128248  |             |             |             |   |
| ZNF471 ZNF471   | 0            | 12.32470668 | 21.18614259 | 12.74988115 |   |
| ARHGAP20        | ARHGAP20     | 1.041678189 | 0           | 11.15060136 |   |
| 0.980760089     |              |             |             |             |   |
| RAD52 RAD52     | 563.5479001  | 492.107931  | 742.6300508 |             |   |
| 472.7263627     |              |             |             |             |   |
| STAMPB STAMPB   | 3875.042862  | 3346.157864 | 3462.261723 |             |   |
| 3711.196176     |              |             |             |             |   |
| TM4SF19 TM4SF19 | 4.166712755  | 1.760672383 | 6.690360818 |             |   |
| 3.923040355     |              |             |             |             |   |
| GLI4 GLI4       | 195.8354995  | 191.0329535 | 201.8258847 |             |   |
| 230.4786208     |              |             |             |             |   |
| ISCA1 ISCA1     | 3134.40967   | 2279.1904   | 3926.12674  |             |   |
| 2670.609721     |              |             |             |             |   |
| CYP4B1 CYP4B1   | 5.208390943  | 0           | 0           | 0           |   |
| KIF9 KIF9       | 162.5017974  | 198.9559793 | 221.8969671 |             |   |
| 162.8061747     |              |             |             |             |   |
| EIF3CL EIF3CL   | 2114.606723  | 1402.375553 | 1694.891407 |             |   |
| 1830.098325     |              |             |             |             |   |
| ANKRD16 ANKRD16 | 372.9207916  | 311.6390118 | 360.164424  |             |   |
| 395.2463157     |              |             |             |             |   |
| RAP1B RAP1B     | 21550.23837  | 16849.6347  | 17538.78088 |             |   |
| 16693.51747     |              |             |             |             |   |
| IL12B IL12B     | 4.166712755  | 3.521344766 | 0           | 0.980760089 |   |
| ABHD14A ABHD14A | 958.3439336  | 752.6874437 | 1164.122782 |             |   |
| 890.5301605     |              |             |             |             |   |
| SYNJ2BP SYNJ2BP | 394.7960335  | 352.1344766 | 805.0734184 |             |   |
| 657.1092594     |              |             |             |             |   |
| STARD8 STARD8   | 26.04195472  | 34.33311147 | 2.230120273 |             |   |
| 19.61520177     |              |             |             |             |   |
| RAB5B RAB5B     | 2538.569746  | 3666.600237 | 4163.634549 |             |   |

|                 |               |               |             |  |
|-----------------|---------------|---------------|-------------|--|
| 3198.258649     |               |               |             |  |
| PKMYT1 PKMYT1   | 7006.327497   | 6836.690863   | 3509.094249 |  |
| 4826.320396     |               |               |             |  |
| TARS TARS       | 14473.07675   | 10951.38222   | 15312.00579 |  |
| 11843.65883     |               |               |             |  |
| ZNF547 ZNF547   | 335.4203768   | 276.4255641   | 425.9529721 |  |
| 330.5161499     |               |               |             |  |
| DNAH17 DNAH17   | 406.2544936   | 361.8181747   | 312.2168382 |  |
| 369.7465534     |               |               |             |  |
| USP39 USP39     | 9263.644132   | 7467.011576   | 7288.033051 |  |
| 7825.484747     |               |               |             |  |
| FAM132B FAM132B | 5.208390943   | 16.72638764   | 5.575300681 |  |
| 19.61520177     |               |               |             |  |
| DPH5 DPH5       | 1843.770394   | 1163.804445   | 1711.617309 |  |
| 1365.218043     |               |               |             |  |
| PPA2 PPA2       | 5181.307311   | 4884.10519    | 4211.582135 |  |
| 5212.739871     |               |               |             |  |
| IRX6 IRX6       | 4.166712755   | 0 0           | 0           |  |
| POMT2 POMT2     | 292.711571    | 264.1008574   | 410.3421301 |  |
| 346.2083113     |               |               |             |  |
| NSUN7 NSUN7     | 6.250069132   | 7.923025723   | 3.345180409 |  |
| 2.942280266     |               |               |             |  |
| TTI2 TTI2       | 5575.061666   | 4307.484985   | 4888.423637 |  |
| 4700.783105     |               |               |             |  |
| SFXN3 SFXN3     | 1308.347805   | 1845.184657   | 1088.298693 |  |
| 1894.828491     |               |               |             |  |
| CDHR5 CDHR5     | 0 0.880336191 | 0             | 0           |  |
| SAC3D1 SAC3D1   | 1407.307233   | 1378.606476   | 1004.669183 |  |
| 1075.893817     |               |               |             |  |
| RBP5 RBP5       | 10.41678189   | 29.05109432   | 16.72590204 |  |
| 13.73064124     |               |               |             |  |
| L3MBTL2 L3MBTL2 | 5246.933036   | 3774.881589   | 4094.50082  |  |
| 4346.728713     |               |               |             |  |
| OR10A5 OR10A5   | 0 0           | 0 0.980760089 |             |  |
| MTRF1L MTRF1L   | 1561.475605   | 889.1395534   | 1360.373366 |  |
| 935.6451246     |               |               |             |  |
| HES2 HES2       | 57.29230038   | 51.0594991    | 24.531323   |  |
| 14.71140133     |               |               |             |  |
| YME1L1 YME1L1   | 19859.59467   | 15554.66017   | 15412.3612  |  |
| 14718.26665     |               |               |             |  |
| LRRC73 LRRC73   | 0 0.880336191 | 0             | 0           |  |
| PLAC9 PLAC9     | 0 3.521344766 | 1.115060136   | 0           |  |
| FAM209A FAM209A | 13.54181645   | 7.042689532   | 7.805420954 |  |
| 12.74988115     |               |               |             |  |
| SPIN4 SPIN4     | 268.7529727   | 493.8686034   | 195.1355238 |  |
| 239.3054616     |               |               |             |  |
| OCIAD2 OCIAD2   | 5233.39122    | 4393.757931   | 4975.398328 |  |
| 4283.960067     |               |               |             |  |
| CDR1 CDR1       | 0 18.48706002 | 0             | 0.980760089 |  |
| SURF6 SURF6     | 1614.601192   | 1353.076726   | 2196.668468 |  |

|             |          |             |   |             |             |   |
|-------------|----------|-------------|---|-------------|-------------|---|
| 1989.96222  |          |             |   |             |             |   |
| TREML4      | TREML4   | 0           | 0 | 2.230120273 | 0           |   |
| C1orf52     | C1orf52  | 1680.226918 |   | 1260.641426 | 1753.989594 |   |
| 1601.581225 |          |             |   |             |             |   |
| TTBK1       | TTBK1    | 23.95859834 |   | 19.36739621 | 13.38072164 |   |
| 4.903800443 |          |             |   |             |             |   |
| HEATR9      | HEATR9   | 7.291747321 |   | 4.401680957 | 3.345180409 |   |
| 10.78836098 |          |             |   |             |             |   |
| SWT1        | SWT1     | 325.0035949 |   | 256.1778317 | 705.8330663 |   |
| 481.5532035 |          |             |   |             |             |   |
| OR7E14P     | OR7E14P  | 1.041678189 |   | 7.923025723 | 15.61084191 |   |
| 10.78836098 |          |             |   |             |             |   |
| METTL21C    | METTL21C |             | 0 | 1.760672383 | 0           | 0 |
| WDR38       | WDR38    | 595.8399239 |   | 647.9274369 | 592.0969324 |   |
| 586.494533  |          |             |   |             |             |   |
| MIR4741     | MIR4741  | 137.5015209 |   | 110.9223601 | 80.28432981 |   |
| 77.480047   |          |             |   |             |             |   |
| POTEE       | POTEE    | 48.95887487 |   | 44.01680957 | 20.07108245 |   |
| 38.24964346 |          |             |   |             |             |   |
| GABRR3      | GABRR3   | 1.041678189 | 0 | 3.345180409 | 0           |   |
| ICA1        | ICA1     | 131.2514518 |   | 241.2121165 | 146.0728779 |   |
| 335.4199503 |          |             |   |             |             |   |
| ZNF236      | ZNF236   | 754.1750086 |   | 1126.830325 | 1040.351107 |   |
| 823.8384745 |          |             |   |             |             |   |
| TCF25       | TCF25    | 5293.808555 |   | 4750.294089 | 5462.679608 |   |
| 5084.2603   |          |             |   |             |             |   |
| ELP3        | ELP3     | 4625.051158 |   | 3512.541404 | 3538.085812 |   |
| 4242.768144 |          |             |   |             |             |   |
| SGMS2       | SGMS2    | 30.20866747 |   | 80.11059342 | 62.44336763 |   |
| 38.24964346 |          |             |   |             |             |   |
| GPCPD1      | GPCPD1   | 2198.982656 |   | 1683.202798 | 3164.540667 |   |
| 2322.43989  |          |             |   |             |             |   |
| OAT         | OAT      | 6863.617585 |   | 5024.958981 | 5813.92355  |   |
| 5531.4869   |          |             |   |             |             |   |
| CCR2        | CCR2     | 15848.09196 |   | 6113.93485  | 1878.87633  |   |
| 1596.677424 |          |             |   |             |             |   |
| TBC1D3      | TBC1D3   | 42.70880574 |   | 54.58084387 | 51.29276627 |   |
| 65.71092594 |          |             |   |             |             |   |
| DDHD1       | DDHD1    | 5533.394538 |   | 4255.545149 | 5285.385046 |   |
| 4549.746051 |          |             |   |             |             |   |
| CPOX        | CPOX     | 7219.871526 |   | 4149.02447  | 4142.448406 |   |
| 2928.549625 |          |             |   |             |             |   |
| CDR2        | CDR2     | 5905.273652 |   | 5253.846391 | 4853.856773 |   |
| 4425.18952  |          |             |   |             |             |   |
| GLRA1       | GLRA1    | 1.041678189 | 0 | 1.115060136 | 0           |   |
| NLRP2       | NLRP2    | 193.7521431 |   | 937.5580439 | 76.9391494  |   |
| 541.3795689 |          |             |   |             |             |   |
| ENPP3       | ENPP3    | 33.33370204 |   | 39.61512861 | 6.690360818 |   |
| 30.40356275 |          |             |   |             |             |   |
| UBQLNL      | UBQLNL   | 1.041678189 | 0 | 15.61084191 | 0           |   |

|              |              |             |             |             |             |
|--------------|--------------|-------------|-------------|-------------|-------------|
| KCTD3        | KCTD3        | 562.5062219 | 588.9449121 | 134.9222765 |             |
| 304.0356275  |              |             |             |             |             |
| KPNA2        | KPNA2        | 44597.36829 | 32777.55742 | 31549.5115  |             |
| 30835.09719  |              |             |             |             |             |
| KPNB1        | KPNB1        | 5756.313671 | 9398.46918  | 7784.234811 |             |
| 5680.562434  |              |             |             |             |             |
| SLC35A3      | SLC35A3      | 1275.014103 | 1282.649831 | 1122.865557 |             |
| 1093.547499  |              |             |             |             |             |
| SP2          | SP2          | 717.716272  | 1612.775903 | 911.0041313 |             |
| 765.9736292  |              |             |             |             |             |
| RNASEH2B     | RNASEH2B     |             | 4338.589656 | 4805.755269 |             |
| 2980.555744  | 3113.913282  |             |             |             |             |
| MIIP         | MIIP         | 3204.202108 | 2172.66972  | 2909.191896 |             |
| 2406.785258  |              |             |             |             |             |
| DYX1C1       | DYX1C1       | 16.66685102 | 6.16235334  | 5.575300681 |             |
| 7.846080709  |              |             |             |             |             |
| TMEM180      | TMEM180      | 264.5862599 | 1021.189982 | 316.6770787 |             |
| 1028.817333  |              |             |             |             |             |
| CSPP1        | CSPP1        | 485.4220359 | 514.996672  | 1010.244483 |             |
| 591.3983335  |              |             |             |             |             |
| RNU6-64P     | RNU6-64P     |             | 0           | 0.880336191 | 0           |
| RNU6-72P     | RNU6-72P     |             | 1.041678189 | 0           | 0           |
| 2.942280266  |              |             |             |             |             |
| RNU6-78P     | RNU6-78P     |             | 2.083356377 | 2.641008574 |             |
| 8.92048109   | 5.884560532  |             |             |             |             |
| RNU6-83P     | RNU6-83P     |             | 2.083356377 | 3.521344766 | 0           |
| 0            |              |             |             |             |             |
| RAB36        | RAB36        | 12.50013826 | 15.84605145 | 84.74457036 |             |
| 49.03800443  |              |             |             |             |             |
| NDRG1        | NDRG1        | 2510.444435 | 2840.84489  | 1961.39078  |             |
| 1945.828016  |              |             |             |             |             |
| LZTR1        | LZTR1        | 1793.769841 | 2526.564869 | 1406.090832 |             |
| 2520.553428  |              |             |             |             |             |
| LYZ          | LYZ          | 2242.73314  | 40.49546481 | 86.97469063 |             |
| 10.78836098  |              |             |             |             |             |
| RNPEPL1      | RNPEPL1      | 5178.182276 | 5213.350926 | 3767.7882   |             |
| 4437.939401  |              |             |             |             |             |
| KLHL34       | KLHL34       | 20.83356377 | 19.36739621 | 136.0373366 |             |
| 40.21116364  |              |             |             |             |             |
| LIN7A        | LIN7A        | 28.12531109 | 13.20504287 | 10.03554123 | 0           |
| DCUN1D1      | DCUN1D1      | 4354.214829 | 3841.787139 | 2899.156354 |             |
| 3335.565062  |              |             |             |             |             |
| RAVER1       | RAVER1       | 2081.273021 | 4945.728723 | 2356.122068 |             |
| 2626.475517  |              |             |             |             |             |
| LDHD         | LDHD         | 3.125034566 | 18.48706002 | 0           | 9.807600887 |
| COPS3        | COPS3        | 12459.51282 | 9526.998264 | 8372.986563 |             |
| 7784.292824  |              |             |             |             |             |
| TRIM39-RPP21 | TRIM39-RPP21 |             | 211.4606723 | 21.12806859 |             |
| 380.2355065  | 36.28812328  |             |             |             |             |
| UBE2L3       | UBE2L3       | 15001.2076  | 11747.20614 | 11458.35796 |             |

|                 |              |               |               |  |
|-----------------|--------------|---------------|---------------|--|
| 10631.43936     |              |               |               |  |
| LINC00597       | LINC00597    | 2.083356377   | 3.521344766   |  |
| 2.230120273     | 8.826840798  |               |               |  |
| RUNX1-IT1       | RUNX1-IT1    | 94.79271517   | 99.47798963   |  |
| 159.4535995     | 107.8836098  |               |               |  |
| LINC00887       | LINC00887    | 93.75103698   | 250.0154784   |  |
| 3.345180409     | 24.51900222  |               |               |  |
| LINC00638       | LINC00638    | 32.29202385   | 30.8117667    |  |
| 194.0204637     | 62.76864567  |               |               |  |
| RNF165 RNF165   | 2.083356377  | 8.803361914   | 1.115060136   |  |
| 12.74988115     |              |               |               |  |
| LINC00689       | LINC00689    | 5.208390943   | 18.48706002   |  |
| 4.460240545     | 34.3266031   |               |               |  |
| PHKB PHKB       | 3569.831153  | 3293.337692   | 2214.509431   |  |
| 2839.300457     |              |               |               |  |
| NNT-AS1 NNT-AS1 | 454.1716903  | 559.0134816   | 463.8650167   |  |
| 384.4579548     |              |               |               |  |
| EPN2-IT1        | EPN2-IT1     | 6.250069132   | 3.521344766   |  |
| 8.92048109      | 4.903800443  |               |               |  |
| FER1L6-AS2      | FER1L6-AS2   | 1.041678189   | 0 0 0         |  |
| FDPS FDPS       | 11440.75155  | 12786.88318   | 6678.095156   |  |
| 10998.24363     |              |               |               |  |
| XRN1 XRN1       | 5181.307311  | 5211.590253   | 11083.69775   |  |
| 6013.040104     |              |               |               |  |
| ZFP82 ZFP82     | 391.670999   | 383.8265795   | 1125.095677   |  |
| 843.4536763     |              |               |               |  |
| GALNT15 GALNT15 | 2.083356377  | 2.641008574   | 0 0           |  |
| NOL4L NOL4L     | 302.0866747  | 493.8686034   | 874.2071468   |  |
| 1158.277665     |              |               |               |  |
| GLRX2 GLRX2     | 1141.679295  | 996.5405687   | 830.7198015   |  |
| 858.1650776     |              |               |               |  |
| FGD5-AS1        | FGD5-AS1     | 3263.577765   | 4537.252731   |  |
| 4859.432074     | 5543.256021  |               |               |  |
| CHEK1 CHEK1     | 5225.057795  | 5326.033958   | 2778.72986    |  |
| 3893.617552     |              |               |               |  |
| LOC100507600    | LOC100507600 | 121.8763481   | 141.7341268   |  |
| 61.32830749     | 147.1140133  |               |               |  |
| LOC646626       | LOC646626    | 268.7529727   | 250.8958146   |  |
| 248.6584104     | 277.5551051  |               |               |  |
| CCDC148 CCDC148 | 5.208390943  | 2.641008574   | 0 2.942280266 |  |
| MAMSTR MAMSTR   | 51.04223125  | 45.77748195   | 104.8156528   |  |
| 92.19144833     |              |               |               |  |
| LHFPL5 LHFPL5   | 0 0          | 0 0.980760089 |               |  |
| RBM45 RBM45     | 1469.807924  | 1035.275361   | 744.860171    |  |
| 897.3954811     |              |               |               |  |
| KCNQ5 KCNQ5     | 233.3359143  | 213.0413583   | 315.5620186   |  |
| 324.6315893     |              |               |               |  |
| PLCD4 PLCD4     | 40.62544936  | 57.22185244   | 65.78854804   |  |
| 44.13420399     |              |               |               |  |
| PTPLAD1 PTPLAD1 | 8116.756446  | 6795.315062   | 5890.8627     |  |



|                 |                |             |             |             |   |
|-----------------|----------------|-------------|-------------|-------------|---|
| 5825.714927     |                |             |             |             |   |
| KRTAP5-9        | KRTAP5-9       | 3.125034566 | 0           | 0           | 0 |
| SLC39A13        | SLC39A13       | 1515.641765 | 1282.649831 |             |   |
| 1701.581768     | 1577.062223    |             |             |             |   |
| FAM66A FAM66A   | 2.083356377    | 7.923025723 | 13.38072164 |             |   |
| 8.826840798     |                |             |             |             |   |
| VPS45 VPS45     | 3139.618061    | 2324.967882 | 2476.548563 |             |   |
| 2363.631814     |                |             |             |             |   |
| HARS2 HARS2     | 2715.655038    | 1948.183992 | 2898.041294 |             |   |
| 2564.687632     |                |             |             |             |   |
| BRE-AS1 BRE-AS1 | 380.2125389    | 292.2716156 | 295.4909361 |             |   |
| 360.9197126     |                |             |             |             |   |
| DUSP9 DUSP9     | 1.041678189    | 5.282017149 | 0           | 4.903800443 |   |
| DUSP4 DUSP4     | 15404.33705    | 18551.32456 | 7271.307149 |             |   |
| 9862.523452     |                |             |             |             |   |
| EEF1A1 EEF1A1   | 104623.0322    | 97487.5495  | 146700.6567 |             |   |
| 142256.3086     |                |             |             |             |   |
| ZNF816-ZNF321P  | ZNF816-ZNF321P | 196.8771777 | 180.4689192 |             |   |
| 425.9529721     | 314.8239885    |             |             |             |   |
| METTL2B METTL2B | 1926.062971    | 1442.871018 | 1775.175737 |             |   |
| 1630.023267     |                |             |             |             |   |
| KIAA1211        | KIAA1211       | 20.83356377 | 25.52974955 |             |   |
| 4.460240545     | 3.923040355    |             |             |             |   |
| HELZ HELZ       | 5228.182829    | 6518.889498 | 6240.991583 |             |   |
| 5843.368608     |                |             |             |             |   |
| ZKSCAN7 ZKSCAN7 | 38.54209298    | 70.42689532 | 312.2168382 |             |   |
| 154.960094      |                |             |             |             |   |
| SLC35E3 SLC35E3 | 837.5092637    | 710.4313065 | 779.4270352 |             |   |
| 642.3978581     |                |             |             |             |   |
| LENEP LENEP     | 0              | 2.641008574 | 2.230120273 | 2.942280266 |   |
| BTN3A3 BTN3A3   | 1538.558685    | 1423.503622 | 5783.816927 |             |   |
| 2998.183591     |                |             |             |             |   |
| ZNF10 ZNF10     | 231.2525579    | 203.3576602 | 795.0378772 |             |   |
| 322.6700692     |                |             |             |             |   |
| RNF5 RNF5       | 1.041678189    | 0           | 2.230120273 | 0.980760089 |   |
| RIT1 RIT1       | 1440.640935    | 1221.026298 | 1612.376957 |             |   |
| 1181.815907     |                |             |             |             |   |
| RLN1 RLN1       | 27.08363291    | 56.34151625 | 82.51445008 |             |   |
| 41.19192372     |                |             |             |             |   |
| DDX52 DDX52     | 5141.723539    | 4247.622124 | 3560.387015 |             |   |
| 4001.501162     |                |             |             |             |   |
| FAM114A1        | FAM114A1       | 30.20866747 | 22.00840479 |             |   |
| 30.10662368     | 13.73064124    |             |             |             |   |
| KRTCAP2 KRTCAP2 | 4130.254018    | 4782.866528 | 4495.922469 |             |   |
| 3871.06007      |                |             |             |             |   |
| APOA1 APOA1     | 2.083356377    | 0.880336191 | 2.230120273 | 0           |   |
| ABCD1 ABCD1     | 75.00082959    | 251.7761508 | 126.0017954 |             |   |
| 139.2679326     |                |             |             |             |   |
| CEACAM3 CEACAM3 | 3.125034566    | 0           | 0           | 0           |   |
| ENTPD2 ENTPD2   | 48.95887487    | 39.61512861 | 18.95602232 |             |   |

|             |            |             |             |             |             |
|-------------|------------|-------------|-------------|-------------|-------------|
| 26.48052239 |            |             |             |             |             |
| EPS8        | EPS8       | 40.62544936 | 14.08537906 | 151.6481785 |             |
| 147.1140133 |            |             |             |             |             |
| LAMC1       | LAMC1      | 3.125034566 | 11.44437049 | 0           | 37.26888337 |
| BVES        | BVES       | 22.91692015 | 110.0420239 | 0           | 21.57672195 |
| CALY        | CALY       | 0           | 15.61084191 | 7.846080709 |             |
| ADCY6       | ADCY6      | 2.083356377 | 0           | 21.18614259 | 4.903800443 |
| LRIF1       | LRIF1      | 2360.442776 | 2280.070736 | 3077.565976 |             |
| 2115.499511 |            |             |             |             |             |
| CENPJ       | CENPJ      | 1837.520325 | 1742.185323 | 837.4101623 |             |
| 994.4907299 |            |             |             |             |             |
| DBIL5P2     | DBIL5P2    | 0           | 1.115060136 | 0           |             |
| VAV3-AS1    | VAV3-AS1   |             | 1.041678189 | 0           | 0           |
| 0.980760089 |            |             |             |             |             |
| MRPL23-AS1  | MRPL23-AS1 |             | 0           | 0           | 22.30120273 |
| 4.903800443 |            |             |             |             |             |
| MIR623      | MIR623     | 0           | 1.115060136 | 0           |             |
| ALKBH3-AS1  | ALKBH3-AS1 |             | 9.375103698 | 10.5640343  |             |
| 27.87650341 |            | 5.884560532 |             |             |             |
| TMEM126A    | TMEM126A   |             | 2358.359419 | 2333.771244 |             |
| 1731.688392 |            | 2220.440841 |             |             |             |
| CTU1        | CTU1       | 444.7965866 | 425.2023805 | 345.6686422 |             |
| 426.6306386 |            |             |             |             |             |
| BTRC        | BTRC       | 1897.93766  | 2031.81593  | 2463.167841 |             |
| 2358.728013 |            |             |             |             |             |
| TVP23C      | TVP23C     | 240.6276616 | 360.0575023 | 275.4198537 |             |
| 227.5363406 |            |             |             |             |             |
| ZBTB49      | ZBTB49     | 466.6718285 | 367.1001918 | 508.4674221 |             |
| 443.3035601 |            |             |             |             |             |
| UBR1        | UBR1       | 3692.749179 | 4700.995262 | 3869.258673 |             |
| 3684.715653 |            |             |             |             |             |
| KHDRBS1     | KHDRBS1    | 14027.23849 | 13692.74912 | 12434.03558 |             |
| 13249.08804 |            |             |             |             |             |
| POLR2L      | POLR2L     | 4503.17481  | 4917.557965 | 3313.958725 |             |
| 3344.391902 |            |             |             |             |             |
| ZWINT       | ZWINT      | 19092.91952 | 15221.89309 | 8714.194965 |             |
| 11040.41632 |            |             |             |             |             |
| APOBEC2     | APOBEC2    | 28.12531109 | 43.13647338 | 86.97469063 |             |
| 48.05724434 |            |             |             |             |             |
| STAT5B      | STAT5B     | 7677.168251 | 12912.77126 | 8963.968435 |             |
| 12084.92581 |            |             |             |             |             |
| SF3B3       | SF3B3      | 24274.22683 | 20620.11461 | 21174.99199 |             |
| 22464.30983 |            |             |             |             |             |
| FHL3        | FHL3       | 883.343104  | 731.5593751 | 741.5149906 |             |
| 716.9356248 |            |             |             |             |             |
| SRM         | SRM        | 18539.7884  | 10139.71225 | 14964.10703 |             |
| 12489.97973 |            |             |             |             |             |
| GOLGA6L5P   | GOLGA6L5P  |             | 7.291747321 | 14.96571525 |             |
| 8.92048109  |            | 10.78836098 |             |             |             |
| C6orf163    | C6orf163   |             | 13.54181645 | 7.923025723 |             |

|                 |               |              |               |  |
|-----------------|---------------|--------------|---------------|--|
| 8.92048109      | 8.826840798   |              |               |  |
| TGDS TGDS       | 2556.278275   | 1858.3897    | 2194.438348   |  |
| 2197.883359     |               |              |               |  |
| QRICH1 QRICH1   | 5603.186977   | 4789.028881  | 5510.627193   |  |
| 5354.950084     |               |              |               |  |
| TMEM104 TMEM104 | 1439.599257   | 1618.938256  | 800.6131778   |  |
| 914.0684026     |               |              |               |  |
| ZSCAN10 ZSCAN10 | 11.45846008   | 10.5640343   | 0 0.980760089 |  |
| ADO ADO         | 242.711018    | 442.8091043  | 341.2084017   |  |
| 323.6508293     |               |              |               |  |
| ZBTB45 ZBTB45   | 262.5029036   | 512.3556634  | 231.9325083   |  |
| 302.0741073     |               |              |               |  |
| ZNF514 ZNF514   | 68.75076045   | 75.70891246  | 161.6837198   |  |
| 71.59548647     |               |              |               |  |
| ZC3H10 ZC3H10   | 530.214198    | 568.6971797  | 711.4083669   |  |
| 694.3781428     |               |              |               |  |
| CCDC142 CCDC142 | 785.4253543   | 691.9442465  | 1272.283615   |  |
| 797.3579521     |               |              |               |  |
| STK39 STK39     | 1239.597045   | 3239.637184  | 1139.591459   |  |
| 2321.45913      |               |              |               |  |
| SCARF2 SCARF2   | 19.79188559   | 21.12806859  | 12.2656615    |  |
| 11.76912106     |               |              |               |  |
| TCEAL8 TCEAL8   | 2082.314699   | 2100.482153  | 1820.893203   |  |
| 2534.284069     |               |              |               |  |
| MBLAC2 MBLAC2   | 258.3361908   | 278.1862365  | 362.3945443   |  |
| 348.1698315     |               |              |               |  |
| EMR4P EMR4P     | 3.125034566   | 0 8.92048109 | 16.67292151   |  |
| MIR3140 MIR3140 | 0 1.760672383 | 0 0          | 0             |  |
| PDXDC2P PDXDC2P | 167.7101884   | 276.4255641  | 512.9276627   |  |
| 470.7648426     |               |              |               |  |
| TUBA3FP TUBA3FP | 16.66685102   | 14.08537906  | 36.7969845    |  |
| 28.44204257     |               |              |               |  |
| MIR3138 MIR3138 | 1.041678189   | 0 0          | 0             |  |
| ZFAS1 ZFAS1     | 1151.054399   | 1545.870352  | 3117.708141   |  |
| 1765.36816      |               |              |               |  |
| DOCK3 DOCK3     | 202.0855686   | 223.6053926  | 226.3572077   |  |
| 269.7090244     |               |              |               |  |
| CDC42EP4        | CDC42EP4      | 21.87524196  | 73.06790389   |  |
| 25.64638313     | 29.42280266   |              |               |  |
| LIG4 LIG4       | 1363.556749   | 991.2585516  | 1134.016159   |  |
| 845.4151964     |               |              |               |  |
| NCOA6 NCOA6     | 1453.141073   | 2405.078475  | 1881.10645    |  |
| 1852.655807     |               |              |               |  |
| NAALADL2        | NAALADL2      | 0 0          | 0 1.961520177 |  |
| PSD3 PSD3       | 3.125034566   | 73.06790389  | 5.575300681   |  |
| 80.42232727     |               |              |               |  |
| HIBCH HIBCH     | 3291.703076   | 2438.53125   | 2426.370857   |  |
| 2611.764116     |               |              |               |  |
| TBC1D25 TBC1D25 | 1528.141903   | 1287.051512  | 1640.25346    |  |
| 1567.254622     |               |              |               |  |

|             |          |             |             |             |
|-------------|----------|-------------|-------------|-------------|
| OAS2        | OAS2     | 20476.26816 | 10395.00975 | 24804.51273 |
| 10423.51822 |          |             |             |             |
| NIPA2       | NIPA2    | 10796.99443 | 7868.444879 | 10051.15207 |
| 8138.347216 |          |             |             |             |
| KCNIP2      | KCNIP2   | 11.45846008 | 20.2477324  | 15.61084191 |
| 16.67292151 |          |             |             |             |
| SLC46A1     | SLC46A1  | 690.6326391 | 1037.91637  | 832.9499218 |
| 890.5301605 |          |             |             |             |
| MAL2        | MAL2     | 1.041678189 | 0           | 19.61520177 |
| CSMD1       | CSMD1    | 0           | 0           | 2.942280266 |
| LDHAL6A     | LDHAL6A  | 8.33342551  | 2.230120273 | 26.76144327 |
| 26.48052239 |          |             | 25.52974955 |             |
| ZAP70       | ZAP70    | 8129.256585 | 11964.64918 | 6041.395818 |
| 8404.1332   |          |             |             |             |
| HTR6        | HTR6     | 4.166712755 | 0.880336191 | 4.460240545 |
| 22.55748204 |          |             |             |             |
| PSMB10      | PSMB10   | 14662.66218 | 13169.82942 | 12267.89162 |
| 12797.9384  |          |             |             |             |
| PARL        | PARL     | 6483.405046 | 4319.809691 | 5070.17844  |
| 4893.012082 |          |             |             |             |
| BTF3        | BTF3     | 18712.70698 | 17202.64952 | 18014.91156 |
| 16755.30535 |          |             |             |             |
| SIL1        | SIL1     | 1301.056058 | 1029.113008 | 868.6318462 |
| 1070.009257 |          |             |             |             |
| ZBED5       | ZBED5    | 1513.558408 | 1923.534578 | 2031.639568 |
| 2227.306161 |          |             |             |             |
| GREB1L      | GREB1L   | 2.083356377 | 1.760672383 | 6.690360818 |
| 13.73064124 |          |             |             |             |
| HTATSF1     | HTATSF1  | 8386.551097 | 5956.354671 | 5857.410896 |
| 5257.854835 |          |             |             |             |
| C11orf21    | C11orf21 |             | 389.5876426 | 419.9203633 |
| 215.2066063 |          | 317.7662687 |             |             |
| PDE7B       | PDE7B    | 578.1313947 | 1007.984939 | 239.7379293 |
| 313.8432284 |          |             |             |             |
| POMGNT2     | POMGNT2  | 1068.761822 | 932.2760267 | 1121.750497 |
| 1171.027546 |          |             |             |             |
| SLC7A3      | SLC7A3   | 0           | 6.16235334  | 0           |
| KDM2B       | KDM2B    | 843.7593328 | 2554.735628 | 1121.750497 |
| 1219.08479  |          |             |             |             |
| JAM3        | JAM3     | 270.8363291 | 256.1778317 | 771.6216143 |
| 723.8009454 |          |             |             |             |
| PRAM1       | PRAM1    | 2.083356377 | 6.16235334  | 1.115060136 |
| 4.903800443 |          |             |             |             |
| SLC41A2     | SLC41A2  | 401.0461026 | 572.2185244 | 202.9409448 |
| 516.8605667 |          |             |             |             |
| SLC24A2     | SLC24A2  | 0           | 1.760672383 | 0           |
| IL31        | IL31     | 2.083356377 | 7.042689532 | 0           |
| ZXDA        | ZXDA     | 144.7932682 | 115.3240411 | 25.49976231 |
| 203.0173384 |          |             |             | 363.5096044 |
| ZP3         | ZP3      | 55.208944   | 252.6564869 | 114.851194  |

|             |          |             |             |             |
|-------------|----------|-------------|-------------|-------------|
| 237.3439415 |          |             |             |             |
| TMEM251     | TMEM251  | 961.4689682 | 627.6797045 | 958.9517172 |
| 937.6066448 |          |             |             |             |
| C21orf49    | C21orf49 |             | 41.66712755 | 29.05109432 |
| 131.5770961 |          | 85.32612771 |             |             |
| CTNNA3      | CTNNA3   | 1.041678189 | 0           | 0           |
| KPNA1       | KPNA1    | 8799.05566  | 6086.644428 | 7290.263171 |
| 6920.243186 |          |             |             |             |
| CENPT       | CENPT    | 2366.692845 | 2235.17359  | 1682.625746 |
| 2237.113762 |          |             |             |             |
| PPIP5K2     | PPIP5K2  | 3996.91921  | 4843.609725 | 3480.102685 |
| 4404.593558 |          |             |             |             |
| KLF12       | KLF12    | 437.5048393 | 639.124075  | 1108.369775 |
| 938.5874049 |          |             |             |             |
| MEPCE       | MEPCE    | 467.7135067 | 1014.147293 | 670.1511419 |
| 625.7249366 |          |             |             |             |
| COL9A2      | COL9A2   | 953.1355427 | 1195.496548 | 616.6282554 |
| 1094.528259 |          |             |             |             |
| CA5A        | CA5A     | 0           | 4.401680957 | 0           |
| SFRP2       | SFRP2    | 1.041678189 | 0           | 0           |
| PSMC1       | PSMC1    | 15577.25563 | 9059.539746 | 9674.261742 |
| 9070.0693   |          |             |             |             |
| OLA1        | OLA1     | 5613.603759 | 3973.837568 | 4553.905597 |
| 3954.424678 |          |             |             |             |
| RSBN1       | RSBN1    | 1219.805159 | 1457.836733 | 2031.639568 |
| 1812.444644 |          |             |             |             |
| SERF1A      | SERF1A   | 13.54181645 | 54.58084387 | 30.10662368 |
| 65.71092594 |          |             |             |             |
| ZNF148      | ZNF148   | 3298.994824 | 3138.398522 | 4538.294755 |
| 3419.910429 |          |             |             |             |
| NAGPA       | NAGPA    | 1290.639276 | 772.9351761 | 1039.236047 |
| 916.0299228 |          |             |             |             |
| BIRC6       | BIRC6    | 4093.795282 | 6768.02464  | 5551.884418 |
| 4812.589755 |          |             |             |             |
| MAN1C1      | MAN1C1   | 2027.105755 | 403.1939757 | 2670.569026 |
| 1335.795241 |          |             |             |             |
| GJA9        | GJA9     | 8.33342551  | 22.88874098 | 20.07108245 |
| 14.71140133 |          |             |             |             |
| ILKAP       | ILKAP    | 4175.04618  | 3085.578351 | 3457.801483 |
| 3104.105681 |          |             |             |             |
| ZNF23       | ZNF23    | 631.2569824 | 511.4753272 | 987.9432807 |
| 879.7417995 |          |             |             |             |
| SMG1        | SMG1     | 2371.901236 | 4369.988854 | 3351.87077  |
| 2835.377416 |          |             |             |             |
| MAN1B1      | MAN1B1   | 1609.392802 | 1375.965467 | 1797.47694  |
| 1678.080512 |          |             |             |             |
| HDHD2       | HDHD2    | 2344.817603 | 2325.848218 | 1829.813684 |
| 2161.595235 |          |             |             |             |
| PNMAL2      | PNMAL2   | 0           | 23.41626286 | 22.55748204 |
| SLC12A5     | SLC12A5  | 2.083356377 | 7.042689532 | 0           |
|             |          |             |             | 3.923040355 |

|                 |             |             |               |
|-----------------|-------------|-------------|---------------|
| FOXRED2 FOXRED2 | 1468.766246 | 1344.273364 | 1241.061932   |
| 1489.774575     |             |             |               |
| AGK AGK         | 8715.721405 | 6768.02464  | 4497.03753    |
| 5137.221344     |             |             |               |
| LOC554223       | LOC554223   | 0 0         | 0 2.942280266 |
| PLEKHA5 PLEKHA5 | 239.5859834 | 355.6558213 | 256.4638313   |
| 302.0741073     |             |             |               |
| GSS GSS         | 6059.442024 | 4330.373726 | 4542.754995   |
| 5235.297353     |             |             |               |
| ARHGAP19        | ARHGAP19    | 5161.515425 | 5181.658823   |
| 2337.166046     | 3940.694036 |             |               |
| ACTR3C ACTR3C   | 452.0883339 | 385.5872518 | 292.1457557   |
| 310.9009481     |             |             |               |
| RP9P RP9P       | 50.00055306 | 65.14487817 | 63.55842777   |
| 64.73016585     |             |             |               |
| IL10RA IL10RA   | 21282.52707 | 10570.19665 | 16956.71949   |
| 12008.42653     |             |             |               |
| LOC146880       | LOC146880   | 123.9597045 | 168.1442126   |
| 111.5060136     | 76.49928692 |             |               |
| THUMPD3-AS1     | THUMPD3-AS1 | 484.3803577 | 550.2101196   |
| 723.6740284     | 538.4372887 |             |               |
| GFOD2 GFOD2     | 1245.847114 | 1039.677042 | 1228.79627    |
| 1298.526357     |             |             |               |
| SOX30 SOX30     | 27.08363291 | 34.33311147 | 40.14216491   |
| 42.17268381     |             |             |               |
| CLCC1 CLCC1     | 2953.157665 | 2427.967216 | 2272.492558   |
| 1694.753433     |             |             |               |
| ADRBK2 ADRBK2   | 1686.476988 | 2670.940005 | 580.946331    |
| 1085.701418     |             |             |               |
| IRF2BP1 IRF2BP1 | 103.1261407 | 294.0322879 | 306.6415375   |
| 203.9980984     |             |             |               |
| UTRN UTRN       | 2082.314699 | 2651.572609 | 2410.760015   |
| 2119.422552     |             |             |               |
| EPHX1 EPHX1     | 30.20866747 | 51.93983529 | 65.78854804   |
| 59.82636541     |             |             |               |
| KBTBD8 KBTBD8   | 2200.024335 | 1316.102606 | 1921.248615   |
| 1179.854387     |             |             |               |
| RBM23 RBM23     | 9499.063403 | 6459.906973 | 9505.887662   |
| 7452.795914     |             |             |               |
| UBE2G1 UBE2G1   | 10298.03057 | 13851.20964 | 7601.364949   |
| 9452.565735     |             |             |               |
| MAP1LC3B        | MAP1LC3B    | 12728.26579 | 9719.79189    |
| 14366.4348      | 10828.57214 |             |               |
| PER2 PER2       | 310.4201002 | 396.1512861 | 632.2390973   |
| 383.4771947     |             |             |               |
| CDK5RAP3        | CDK5RAP3    | 4627.134514 | 4075.956566   |
| 3762.2129       | 4813.570515 |             |               |
| IMPDH2 IMPDH2   | 8733.429934 | 7078.783315 | 10036.65629   |
| 11004.12819     |             |             |               |
| PSME2 PSME2     | 37138.95246 | 25913.57613 | 31075.61094   |

|             |          |             |             |             |             |
|-------------|----------|-------------|-------------|-------------|-------------|
| 28654.86751 |          |             |             |             |             |
| RORB        | RORB     | 6.250069132 | 17.60672383 | 0           | 7.846080709 |
| CCNI        | CCNI     | 5677.146128 | 8742.618717 | 6683.670457 |             |
| 6178.788559 |          |             |             |             |             |
| IFT88       | IFT88    | 726.0496975 | 493.8686034 | 496.2017606 |             |
| 538.4372887 |          |             |             |             |             |
| SLC25A51    | SLC25A51 |             | 696.8827082 | 509.7146548 |             |
| 783.8872758 |          | 586.494533  |             |             |             |
| PVRL4       | PVRL4    | 15.62517283 | 18.48706002 | 0           | 25.49976231 |
| CEP83       | CEP83    | 673.9657881 | 743.8840818 | 613.2830749 |             |
| 729.685506  |          |             |             |             |             |
| ACSL4       | ACSL4    | 5074.014457 | 4550.457774 | 4641.995347 |             |
| 4549.746051 |          |             |             |             |             |
| NPAP1       | NPAP1    | 0           | 0           | 0           | 0.980760089 |
| SLC16A6     | SLC16A6  | 89.58432423 | 316.9210289 | 163.91384   |             |
| 125.5372913 |          |             |             |             |             |
| ZNF33B      | ZNF33B   | 503.1305651 | 635.6027302 | 731.4794494 |             |
| 572.7638918 |          |             |             |             |             |
| ZNF274      | ZNF274   | 1553.142179 | 1529.143965 | 3735.451456 |             |
| 2575.475993 |          |             |             |             |             |
| SLMAP       | SLMAP    | 2909.407181 | 2873.417329 | 3103.212359 |             |
| 2499.957466 |          |             |             |             |             |
| ARIH1       | ARIH1    | 1510.433374 | 2775.700012 | 2535.64675  |             |
| 1659.44607  |          |             |             |             |             |
| KCNQ4       | KCNQ4    | 11.45846008 | 30.8117667  | 27.87650341 |             |
| 32.36508293 |          |             |             |             |             |
| LATS1       | LATS1    | 1611.476158 | 1878.637433 | 2824.447325 |             |
| 1837.944406 |          |             |             |             |             |
| PBK         | PBK      | 4509.424879 | 3899.008992 | 2032.754628 |             |
| 2850.088818 |          |             |             |             |             |
| TOMM70A     | TOMM70A  | 4726.093942 | 3867.316889 | 4499.26765  |             |
| 4164.307336 |          |             |             |             |             |
| GLIPR1      | GLIPR1   | 5095.889699 | 5104.189238 | 3405.393656 |             |
| 3926.963395 |          |             |             |             |             |
| KATNA1      | KATNA1   | 2745.863705 | 2173.550057 | 1888.911871 |             |
| 2319.49761  |          |             |             |             |             |
| TSFM        | TSFM     | 4087.545212 | 2655.093953 | 3031.848511 |             |
| 3067.817557 |          |             |             |             |             |
| SOS2        | SOS2     | 1176.054675 | 1556.434386 | 2719.631672 |             |
| 2839.300457 |          |             |             |             |             |
| TMEM222     | TMEM222  | 3119.826175 | 2314.403847 | 3290.542462 |             |
| 2699.051764 |          |             |             |             |             |
| IQUB        | IQUB     | 2.083356377 | 0.880336191 | 13.38072164 |             |
| 7.846080709 |          |             |             |             |             |
| SPSB3       | SPSB3    | 1646.893216 | 1685.843807 | 2029.409448 |             |
| 2086.076709 |          |             |             |             |             |
| EID3        | EID3     | 407.2961718 | 364.4591833 | 350.1288828 |             |
| 341.3045109 |          |             |             |             |             |
| LIPJ        | LIPJ     | 4.166712755 | 0           | 0           | 1.961520177 |
| ASPG        | ASPG     | 0           | 5.282017149 | 0           | 0           |

|             |          |             |             |             |             |
|-------------|----------|-------------|-------------|-------------|-------------|
| AWAT1       | AWAT1    | 0           | 0           | 0           | 0.980760089 |
| MPST        | MPST     | 1628.143009 |             | 1743.065659 | 669.0360818 |
| 1009.202131 |          |             |             |             |             |
| MIR548AZ    | MIR548AZ |             |             | 3.125034566 | 4.401680957 |
| 2.230120273 |          | 1.961520177 |             |             |             |
| MIR6499     | MIR6499  | 0           | 0           | 0           | 2.942280266 |
| FAM53A      | FAM53A   | 16.66685102 |             | 32.57243908 | 44.60240545 |
| 48.05724434 |          |             |             |             |             |
| CCDC50      | CCDC50   | 1665.643424 |             | 3440.353836 | 841.8704029 |
| 1390.717806 |          |             |             |             |             |
| KRTCAP3     | KRTCAP3  | 58.33397857 |             | 59.86286102 | 105.9307129 |
| 116.7104506 |          |             |             |             |             |
| AKR1A1      | AKR1A1   | 7224.038239 |             | 5706.339193 | 5250.818182 |
| 5678.600913 |          |             |             |             |             |
| LURAP1L     | LURAP1L  | 1.041678189 | 0           | 0           | 0           |
| FITM1       | FITM1    | 2.083356377 |             | 6.16235334  | 5.575300681 |
| 10.78836098 |          |             |             |             |             |
| PMP22       | PMP22    | 63.54236951 |             | 18.48706002 | 28.99156354 |
| 4.903800443 |          |             |             |             |             |
| NAGS        | NAGS     | 55.208944   |             | 32.57243908 | 152.7632387 |
| 60.8071255  |          |             |             |             |             |
| SP7         | SP7      | 0           | 1.760672383 | 0           | 0           |
| PPIH        | PPIH     | 2784.405798 |             | 2613.718152 | 2361.697369 |
| 2097.84583  |          |             |             |             |             |
| SLC30A9     | SLC30A9  | 5763.605418 |             | 5140.283022 | 4461.355605 |
| 5680.562434 |          |             |             |             |             |
| HMG20B      | HMG20B   | 2425.026823 |             | 3003.707085 | 2419.680496 |
| 2839.300457 |          |             |             |             |             |
| TIMM17A     | TIMM17A  | 10326.15588 |             | 6974.023309 | 7556.762543 |
| 6600.515397 |          |             |             |             |             |
| TGFB2       | TGFB2    | 1.041678189 | 0           | 3.345180409 | 0           |
| RALB        | RALB     | 12776.18298 |             | 5572.528092 | 8099.79683  |
| 4810.628235 |          |             |             |             |             |
| PTPRN       | PTPRN    | 0           | 4.401680957 | 37.91204463 | 18.63444168 |
| ACTR3       | ACTR3    | 95738.55897 |             | 75376.14538 | 48498.42557 |
| 64030.88391 |          |             |             |             |             |
| TESK2       | TESK2    | 350.0038714 |             | 291.3912794 | 898.7384698 |
| 616.8980958 |          |             |             |             |             |
| APTX        | APTX     | 4143.795835 |             | 3068.851963 | 2980.555744 |
| 3372.833945 |          |             |             |             |             |
| CYP2R1      | CYP2R1   | 345.8371586 |             | 470.0995262 | 351.2439429 |
| 450.1688807 |          |             |             |             |             |
| HNRNPK      | HNRNPK   | 61232.96897 |             | 73206.99701 | 66835.58951 |
| 72193.75013 |          |             |             |             |             |
| GPR132      | GPR132   | 3445.871448 |             | 3067.091291 | 2846.748528 |
| 2973.664589 |          |             |             |             |             |
| MTRNR2L9    | MTRNR2L9 |             |             | 1.041678189 | 4.401680957 |
| 3.345180409 |          | 0.980760089 |             |             |             |
| LYPLA1      | LYPLA1   | 10927.2042  |             | 9777.013742 | 7212.208961 |
| 8186.40446  |          |             |             |             |             |



|             |          |             |             |             |             |
|-------------|----------|-------------|-------------|-------------|-------------|
| ADAMTS19    | ADAMTS19 | 0           | 0           | 2.230120273 | 0           |
| TMEM145     | TMEM145  | 3.125034566 | 2.641008574 | 1.115060136 |             |
| 0.980760089 |          |             |             |             |             |
| CSNK2B      | CSNK2B   | 1109.387271 | 1031.754016 | 912.1191915 |             |
| 1006.259851 |          |             |             |             |             |
| C7orf76     | C7orf76  | 0           | 3.521344766 | 4.460240545 | 1.961520177 |
| ZMYM6NB     | ZMYM6NB  | 2422.943467 | 3060.048601 | 3312.843665 |             |
| 3462.083113 |          |             |             |             |             |
| CHAMP1      | CHAMP1   | 464.5884722 | 1315.22227  | 641.1595784 |             |
| 644.3593783 |          |             |             |             |             |
| ZBED6       | ZBED6    | 50.00055306 | 156.6998421 | 109.2758934 |             |
| 91.21068825 |          |             |             |             |             |
| NARS2       | NARS2    | 2148.982103 | 1799.407175 | 2275.837738 |             |
| 2114.518751 |          |             |             |             |             |
| BEST2       | BEST2    | 0           | 1.760672383 | 0           | 0           |
| MFAP3L      | MFAP3L   | 19.79188559 | 5.282017149 | 78.05420954 |             |
| 92.19144833 |          |             |             |             |             |
| ZNF500      | ZNF500   | 341.6704459 | 505.3129739 | 822.9143806 |             |
| 549.2256497 |          |             |             |             |             |
| LANCL2      | LANCL2   | 1988.563662 | 1335.470002 | 1316.886021 |             |
| 1392.679326 |          |             |             |             |             |
| TEFM        | TEFM     | 1418.765693 | 1272.085797 | 1249.982413 |             |
| 1251.449873 |          |             |             |             |             |
| CUZD1       | CUZD1    | 68.75076045 | 66.02521436 | 83.62951022 |             |
| 124.5565313 |          |             |             |             |             |
| ATG101      | ATG101   | 2622.945679 | 1925.295251 | 2312.634723 |             |
| 2174.345117 |          |             |             |             |             |
| VPS28       | VPS28    | 2983.366332 | 2760.734296 | 3444.420761 |             |
| 2956.991667 |          |             |             |             |             |
| RINT1       | RINT1    | 3879.209575 | 2703.512444 | 3305.038244 |             |
| 2704.936325 |          |             |             |             |             |
| FDPSP2      | FDPSP2   | 20.83356377 | 52.82017149 | 61.32830749 |             |
| 22.55748204 |          |             |             |             |             |
| ZNF37BP     | ZNF37BP  | 292.711571  | 504.4326377 | 512.9276627 |             |
| 637.4940576 |          |             |             |             |             |
| EME2        | EME2     | 19.79188559 | 50.17916291 | 41.25722504 |             |
| 26.48052239 |          |             |             |             |             |
| SNORA78     | SNORA78  | 18.7502074  | 32.57243908 | 49.062646   |             |
| 14.71140133 |          |             |             |             |             |
| SNORA77     | SNORA77  | 4.166712755 | 10.5640343  | 4.460240545 |             |
| 3.923040355 |          |             |             |             |             |
| ZDHHC2      | ZDHHC2   | 516.6723816 | 1178.77016  | 724.7890886 |             |
| 850.3189969 |          |             |             |             |             |
| TCP10L      | TCP10L   | 42.70880574 | 57.22185244 | 49.062646   |             |
| 45.11496408 |          |             |             |             |             |
| C18orf8     | C18orf8  | 5770.897165 | 4604.158281 | 5386.855518 |             |
| 4745.898069 |          |             |             |             |             |
| C2CD2L      | C2CD2L   | 1665.643424 | 1537.06699  | 1440.657696 |             |
| 1271.065075 |          |             |             |             |             |
| COLCA2      | COLCA2   | 0           | 2.641008574 | 2.230120273 | 3.923040355 |

|           |           |             |             |             |             |
|-----------|-----------|-------------|-------------|-------------|-------------|
| MIR3134   | MIR3134   | 13.54181645 | 15.84605145 | 14.49578177 |             |
|           |           | 15.69216142 |             |             |             |
| CCDC112   | CCDC112   | 50.00055306 | 63.38420578 | 156.1084191 |             |
|           |           | 128.4795716 |             |             |             |
| TRPM5     | TRPM5     | 2.083356377 | 0           | 0           | 0           |
| MORC2     | MORC2     | 2106.273298 | 2217.566866 | 1689.316106 |             |
|           |           | 1797.733243 |             |             |             |
| NUDT22    | NUDT22    | 2093.773159 | 2136.575937 | 1362.603487 |             |
|           |           | 2342.055092 |             |             |             |
| PPIL1     | PPIL1     | 5017.763835 | 4570.705506 | 4014.216491 |             |
|           |           | 4860.646999 |             |             |             |
| ELK3      | ELK3      | 2196.8993   | 3088.21936  | 1678.165505 |             |
|           |           | 2027.231103 |             |             |             |
| HEMK1     | HEMK1     | 1201.054952 | 882.9772    | 1498.640823 |             |
|           |           | 1312.256999 |             |             |             |
| TTF1      | TTF1      | 1243.763757 | 1604.852877 | 1049.271588 |             |
|           |           | 1233.796192 |             |             |             |
| RASSF3    | RASSF3    | 92.70935879 | 260.5795127 | 168.3740806 |             |
|           |           | 71.59548647 |             |             |             |
| SYT17     | SYT17     | 6.250069132 | 0           | 1.115060136 | 17.6536816  |
| C9orf78   | C9orf78   | 9563.64745  | 7145.688866 | 9347.549122 |             |
|           |           | 7925.522277 |             |             |             |
| IL23A     | IL23A     | 1195.846561 | 1023.830991 | 506.2373019 |             |
|           |           | 742.4353871 |             |             |             |
| CERCAM    | CERCAM    | 42.70880574 | 29.93143051 | 55.75300681 |             |
|           |           | 56.88408514 |             |             |             |
| FAM133B   | FAM133B   | 995.8443484 | 932.2760267 | 945.5709956 |             |
|           |           | 926.8182838 |             |             |             |
| SHROOM3   | SHROOM3   | 0           | 0.880336191 | 0           | 1.961520177 |
| SLC2A8    | SLC2A8    | 898.9682768 | 803.7469428 | 307.7565976 |             |
|           |           | 326.5931095 |             |             |             |
| SLC39A2   | SLC39A2   | 4.166712755 | 0           | 4.460240545 | 0           |
| BRD1      | BRD1      | 404.1711372 | 775.5761847 | 511.8126025 |             |
|           |           | 461.9380018 |             |             |             |
| LEPREL4   | LEPREL4   | 47.91719668 | 98.59765344 | 180.6397421 |             |
|           |           | 226.5555805 |             |             |             |
| RNU11     | RNU11     | 12.50013826 | 15.84605145 | 4.460240545 |             |
|           |           | 7.846080709 |             |             |             |
| SNORD1C   | SNORD1C   | 7.291747321 | 5.282017149 | 4.460240545 |             |
|           |           | 13.73064124 |             |             |             |
| SNORD1B   | SNORD1B   | 6.250069132 | 0.880336191 | 4.460240545 |             |
|           |           | 4.903800443 |             |             |             |
| NUTM2G    | NUTM2G    | 11.45846008 | 17.60672383 | 39.02710477 |             |
|           |           | 25.49976231 |             |             |             |
| MTRNR2L5  | MTRNR2L5  |             | 0           | 0           | 1.115060136 |
| AGBL5-AS1 | AGBL5-AS1 |             | 3.125034566 | 4.401680957 | 0           |
|           |           | 6.690360818 |             |             |             |
| PRNCR1    | PRNCR1    | 4.166712755 | 4.401680957 | 5.575300681 |             |
|           |           | 2.942280266 |             |             |             |
| PVRL1     | PVRL1     | 5.208390943 | 18.48706002 | 24.531323   |             |

|             |             |             |             |             |             |
|-------------|-------------|-------------|-------------|-------------|-------------|
| 14.71140133 |             |             |             |             |             |
| PPP1R37     | PPP1R37     | 34.37538023 | 116.2043773 | 65.78854804 |             |
| 73.55700665 |             |             |             |             |             |
| USP3        | USP3        | 3539.622485 | 3796.889994 | 4209.352014 |             |
| 3948.540117 |             |             |             |             |             |
| SNAR-G2     | SNAR-G2     | 1.041678189 | 0.880336191 | 0           | 0.980760089 |
| STOML1      | STOML1      | 542.7143363 | 365.3395194 | 792.8077569 |             |
| 376.611874  |             |             |             |             |             |
| RHBG        | RHBG        | 0           | 0           | 0           | 0.980760089 |
| ST14        | ST14        | 18.7502074  | 3.521344766 | 0           | 8.826840798 |
| LOC441242   | LOC441242   |             | 204.168925  | 244.7334612 |             |
| 218.5517867 | 218.7094998 |             |             |             |             |
| TGFB1I1     | TGFB1I1     | 5.208390943 | 69.54655912 | 5.575300681 |             |
| 124.5565313 |             |             |             |             |             |
| ZNF286B     | ZNF286B     | 75.00082959 | 69.54655912 | 104.8156528 |             |
| 63.74940576 |             |             |             |             |             |
| PTCHD2      | PTCHD2      | 5.208390943 | 6.16235334  | 35.68192436 |             |
| 7.846080709 |             |             |             |             |             |
| TM2D1       | TM2D1       | 1634.393078 | 1445.512026 | 1382.674569 |             |
| 1269.103555 |             |             |             |             |             |
| ESF1        | ESF1        | 1396.890451 | 1062.565783 | 1437.312516 |             |
| 1307.353198 |             |             |             |             |             |
| FAM206A     | FAM206A     | 2044.814284 | 1268.564452 | 1651.404062 |             |
| 1818.329204 |             |             |             |             |             |
| ZAK         | ZAK         | 2508.361078 | 3062.68961  | 790.5776366 |             |
| 1244.584553 |             |             |             |             |             |
| MIR7113     | MIR7113     | 101.0427843 | 73.06790389 | 85.85963049 |             |
| 78.46080709 |             |             |             |             |             |
| MARVELD2    | MARVELD2    |             | 10.41678189 | 4.401680957 |             |
| 76.9391494  | 48.05724434 |             |             |             |             |
| REV1        | REV1        | 1956.271638 | 2038.858619 | 2173.252206 |             |
| 2377.362455 |             |             |             |             |             |
| SEC31B      | SEC31B      | 1104.17888  | 1856.629028 | 447.1391146 |             |
| 1325.98764  |             |             |             |             |             |
| ZBTB2       | ZBTB2       | 2725.030142 | 2440.291923 | 2664.993726 |             |
| 2412.669818 |             |             |             |             |             |
| TMOD3       | TMOD3       | 8549.052895 | 7967.042533 | 5477.175389 |             |
| 6942.800668 |             |             |             |             |             |
| LRRC17      | LRRC17      | 7.291747321 | 5.282017149 | 0           | 12.74988115 |
| NT5DC3      | NT5DC3      | 301.0449965 | 417.2793547 | 534.1138053 |             |
| 347.1890714 |             |             |             |             |             |
| VPS33B      | VPS33B      | 1432.307509 | 1391.811519 | 1397.170351 |             |
| 1653.561509 |             |             |             |             |             |
| ECEL1       | ECEL1       | 8.33342551  | 15.84605145 | 152.7632387 |             |
| 82.38384745 |             |             |             |             |             |
| SEC14L6     | SEC14L6     | 2.083356377 | 0           | 0           | 2.942280266 |
| KIR2DS2     | KIR2DS2     | 0           | 1.760672383 | 0           | 0           |
| ADRA2A      | ADRA2A      | 1.041678189 | 0           | 0           | 1.961520177 |
| FLCN        | FLCN        | 605.2150276 | 742.1234094 | 773.8517346 |             |
| 539.4180488 |             |             |             |             |             |

|               |               |             |             |             |             |
|---------------|---------------|-------------|-------------|-------------|-------------|
| CCRN4L        | CCRN4L        | 71.87579502 | 132.0504287 | 40.14216491 |             |
| 56.88408514   |               |             |             |             |             |
| ZNF197        | ZNF197        | 542.7143363 | 567.8168435 | 821.7993204 |             |
| 531.5719681   |               |             |             |             |             |
| DGKE          | DGKE          | 1365.640105 | 1572.280438 | 1530.977567 |             |
| 1478.005454   |               |             |             |             |             |
| LOC102724084  | LOC102724084  |             | 1.041678189 | 1.760672383 | 0           |
| 5.884560532   |               |             |             |             |             |
| SH3PXD2B      | SH3PXD2B      |             | 0           | 10.5640343  | 3.345180409 |
| 7.846080709   |               |             |             |             |             |
| DPH1          | DPH1          | 6252.152489 | 4451.86012  | 4887.308577 |             |
| 4715.494506   |               |             |             |             |             |
| ZHX1-C8orf76  | ZHX1-C8orf76  |             | 2329.19243  | 1814.372891 |             |
| 1626.872739   | 1538.812579   |             |             |             |             |
| POSTN         | POSTN         | 0           | 0           | 2.230120273 | 0           |
| CPXCR1        | CPXCR1        | 3.125034566 | 0           | 0           | 0           |
| ETV4          | ETV4          | 104.1678189 | 115.3240411 | 100.3554123 |             |
| 85.32612771   |               |             |             |             |             |
| SRD5A3-AS1    | SRD5A3-AS1    |             | 8.33342551  | 2.641008574 |             |
| 13.38072164   | 5.884560532   |             |             |             |             |
| C10TNF3-AMACR | C10TNF3-AMACR |             | 663.5490062 | 517.6376806 |             |
| 860.8264252   | 768.9159095   |             |             |             |             |
| MIR941-2      | MIR941-2      |             | 0           | 1.760672383 | 0           |
| PPP1R3C       | PPP1R3C       | 0           | 0.880336191 | 0           | 0.980760089 |
| ASPA          | ASPA          | 0           | 0.880336191 | 37.91204463 | 0           |
| TMED5         | TMED5         | 6004.23308  | 4897.310233 | 5435.918164 |             |
| 3888.713752   |               |             |             |             |             |
| MIR9-1        | MIR9-1        | 1.041678189 | 0           | 0           | 0.980760089 |
| ROCK1P1       | ROCK1P1       | 4.166712755 | 14.96571525 | 7.805420954 |             |
| 12.74988115   |               |             |             |             |             |
| LOC100506747  | LOC100506747  |             | 27.08363291 | 26.41008574 |             |
| 14.49578177   | 24.51900222   |             |             |             |             |
| MIR146A       | MIR146A       | 7.291747321 | 14.96571525 | 7.805420954 |             |
| 22.55748204   |               |             |             |             |             |
| MIR152        | MIR152        | 1.041678189 | 0           | 0           | 2.942280266 |
| MIR142        | MIR142        | 37.50041479 | 112.6830325 | 26.76144327 |             |
| 60.8071255    |               |             |             |             |             |
| MIR130A       | MIR130A       | 0           | 0           | 3.345180409 | 0           |
| DUSP6         | DUSP6         | 12933.47639 | 3231.714159 | 2852.323829 |             |
| 2733.378367   |               |             |             |             |             |
| GAP43         | GAP43         | 2.083356377 | 0.880336191 | 12.2656615  |             |
| 1.961520177   |               |             |             |             |             |
| GABRR2        | GABRR2        | 1.041678189 | 0.880336191 | 6.690360818 | 0           |
| CDKL2         | CDKL2         | 156.2517283 | 80.11059342 | 92.54999131 |             |
| 43.1534439    |               |             |             |             |             |
| RAG1          | RAG1          | 5.208390943 | 3.521344766 | 36.7969845  |             |
| 34.3266031    |               |             |             |             |             |
| IL6R          | IL6R          | 550.0060836 | 434.0057424 | 1264.478195 |             |
| 1740.849157   |               |             |             |             |             |
| GSTM1         | GSTM1         | 2.083356377 | 2940.322879 | 0           | 3291.430858 |

|              |              |             |             |             |             |
|--------------|--------------|-------------|-------------|-------------|-------------|
| VPS53        | VPS53        | 681.2575354 | 1153.240411 | 767.1613738 |             |
| 898.3762412  |              |             |             |             |             |
| PLAU         | PLAU         | 290.6282146 | 77.46958485 | 220.781907  |             |
| 74.53776674  |              |             |             |             |             |
| PLAG1        | PLAG1        | 94.79271517 | 98.59765344 | 257.5788915 |             |
| 203.9980984  |              |             |             |             |             |
| RASSF1       | RASSF1       | 4858.387072 | 3582.968299 | 3855.877951 |             |
| 3715.119216  |              |             |             |             |             |
| PPP1R14C     | PPP1R14C     |             | 9.375103698 | 2.641008574 |             |
| 34.56686422  | 27.46128248  |             |             |             |             |
| SMKR1        | SMKR1        | 180.2103266 | 46.65781815 | 117.0813143 |             |
| 105.9220896  |              |             |             |             |             |
| C1QTNF9      | C1QTNF9      | 0           | 0.880336191 | 2.230120273 | 0           |
| SP6          | SP6          | 0           | 3.521344766 | 33.45180409 | 8.826840798 |
| C11orf70     | C11orf70     | 0           | 0           | 0           | 1.961520177 |
| DHH          | DHH          | 1.041678189 | 2.641008574 | 0           | 0           |
| CPNE5        | CPNE5        | 94.79271517 | 132.9307649 | 28.99156354 |             |
| 109.8451299  |              |             |             |             |             |
| CETN3        | CETN3        | 1416.682337 | 1417.341268 | 1305.73542  |             |
| 1444.659611  |              |             |             |             |             |
| LOC101928943 | LOC101928943 | 0           | 3.521344766 | 0           |             |
| 1.961520177  |              |             |             |             |             |
| LOC101928812 | LOC101928812 | 7.291747321 | 28.17075813 |             |             |
| 11.15060136  | 24.51900222  |             |             |             |             |
| RFWD2        | RFWD2        | 4635.46794  | 3832.103441 | 3843.61229  |             |
| 4119.192372  |              |             |             |             |             |
| ERCC6-PGBD3  | ERCC6-PGBD3  | 717.716272  | 526.4410425 |             |             |
| 845.2155833  | 663.97458    |             |             |             |             |
| MIR4489      | MIR4489      | 3.125034566 | 1.760672383 | 0           | 5.884560532 |
| MIR4479      | MIR4479      | 0           | 1.115060136 | 0           |             |
| MIR4485      | MIR4485      | 0           | 0           | 0.980760089 |             |
| MIR4484      | MIR4484      | 0           | 5.575300681 | 5.884560532 |             |
| MIR4473      | MIR4473      | 1.041678189 | 0           | 0           | 6.865320621 |
| MIR4470      | MIR4470      | 0           | 2.641008574 | 0           | 0           |
| NELL1        | NELL1        | 0           | 0           | 2.942280266 |             |
| TAX1BP3      | TAX1BP3      | 1694.810413 | 2320.566201 | 1093.873994 |             |
| 1239.680752  |              |             |             |             |             |
| CXXC1        | CXXC1        | 5749.021923 | 4999.429231 | 5161.613371 |             |
| 4743.936549  |              |             |             |             |             |
| MAPK9        | MAPK9        | 3483.371863 | 3535.430145 | 2935.953339 |             |
| 3230.623732  |              |             |             |             |             |
| PLA2G4C      | PLA2G4C      | 147.9183028 | 74.82857627 | 85.85963049 |             |
| 100.037529   |              |             |             |             |             |
| SDHC         | SDHC         | 8269.88314  | 5822.54357  | 5276.464565 |             |
| 5633.485949  |              |             |             |             |             |
| MYE0V2       | MYE0V2       | 3125.034566 | 2605.795127 | 2756.428657 |             |
| 1992.9045    |              |             |             |             |             |
| MCTP2        | MCTP2        | 1076.053569 | 2931.519517 | 669.0360818 |             |
| 1514.293577  |              |             |             |             |             |
| LOC100131347 | LOC100131347 | 3.125034566 | 0           | 16.72590204 |             |

|             |             |             |             |             |             |
|-------------|-------------|-------------|-------------|-------------|-------------|
|             |             | 15.69216142 |             |             |             |
| PTPRG-AS1   | PTPRG-AS1   |             | 75.00082959 | 56.34151625 |             |
| 65.78854804 | 38.24964346 |             |             |             |             |
| PRKG1-AS1   | PRKG1-AS1   | 0           | 0           | 1.115060136 | 0           |
| ARHGEF34P   | ARHGEF34P   |             | 27.08363291 | 63.38420578 |             |
| 32.33674395 | 56.88408514 |             |             |             |             |
| BMF         | BMF         |             | 85.41761147 | 253.5368231 | 279.8800942 |
| 118.6719707 |             |             |             |             |             |
| UNC13A      | UNC13A      | 0           | 0           | 0.980760089 |             |
| PUS7L       | PUS7L       | 1620.851262 | 1195.496548 | 1362.603487 |             |
| 1270.084315 |             |             |             |             |             |
| CCDC88C     | CCDC88C     | 1255.222217 | 2795.067408 | 1805.282361 |             |
| 1575.100702 |             |             |             |             |             |
| SLC4A8      | SLC4A8      | 285.4198237 | 232.4087545 | 83.62951022 |             |
| 154.960094  |             |             |             |             |             |
| TAF11       | TAF11       | 1598.97602  | 1816.133563 | 1289.009518 |             |
| 1671.215191 |             |             |             |             |             |
| FAM157A     | FAM157A     | 0           | 7.923025723 | 1.115060136 | 11.76912106 |
| KIF3B       | KIF3B       | 1075.011891 | 1316.982942 | 1185.308925 |             |
| 1674.157471 |             |             |             |             |             |
| MIR1281     | MIR1281     | 1.041678189 | 5.282017149 | 4.460240545 |             |
| 5.884560532 |             |             |             |             |             |
| SPOCK2      | SPOCK2      | 16042.88578 | 20621.87528 | 12377.16751 |             |
| 16817.09324 |             |             |             |             |             |
| FOXJ2       | FOXJ2       | 1393.765416 | 2657.734962 | 2912.537076 |             |
| 2468.573143 |             |             |             |             |             |
| ST6GALNAC1  | ST6GALNAC1  |             | 128.1264172 | 72.1875677  |             |
| 137.1523968 | 184.3828967 |             |             |             |             |
| MRPL19      | MRPL19      | 4697.968631 | 4266.109184 | 3268.241259 |             |
| 3940.694036 |             |             |             |             |             |
| DHCR24      | DHCR24      | 10626.1592  | 13508.75886 | 7321.484855 |             |
| 11516.08496 |             |             |             |             |             |
| TATDN2      | TATDN2      | 2157.315529 | 2721.119168 | 1843.194405 |             |
| 1967.404738 |             |             |             |             |             |
| FAM184A     | FAM184A     | 286.4615019 | 425.2023805 | 321.1373192 |             |
| 527.6489277 |             |             |             |             |             |
| KDM5A       | KDM5A       | 6129.234462 | 6865.741957 | 6312.355431 |             |
| 5905.156494 |             |             |             |             |             |
| HCCS        | HCCS        | 3497.955358 | 2364.58301  | 2636.002162 |             |
| 2456.804022 |             |             |             |             |             |
| TAS2R30     | TAS2R30     | 0           | 0           | 5.884560532 |             |
| CC2D2B      | CC2D2B      | 6.250069132 | 11.44437049 | 2.230120273 |             |
| 12.74988115 |             |             |             |             |             |
| CRMP1       | CRMP1       | 7.291747321 | 19.36739621 | 3.345180409 |             |
| 9.807600887 |             |             |             |             |             |
| IDI2        | IDI2        | 40.62544936 | 40.49546481 | 82.51445008 |             |
| 36.28812328 |             |             |             |             |             |
| GATM        | GATM        | 38.54209298 | 62.50386959 | 26.76144327 |             |
| 67.67244612 |             |             |             |             |             |
| DIMT1       | DIMT1       | 4788.594633 | 3318.867442 | 4542.754995 |             |

|             |             |             |             |             |   |
|-------------|-------------|-------------|-------------|-------------|---|
| 4038.770045 |             |             |             |             |   |
| PTGR2       | PTGR2       | 101.0427843 | 303.715986  | 259.8090118 |   |
| 509.014486  |             |             |             |             |   |
| PRKAR1B     | PRKAR1B     | 963.5523245 | 907.6266134 | 911.0041313 |   |
| 989.5869295 |             |             |             |             |   |
| HSPA6       | HSPA6       | 26.04195472 | 58.98252483 | 50.17770613 |   |
| 15.69216142 |             |             |             |             |   |
| HSPA4       | HSPA4       | 16844.97799 | 13098.52219 | 14961.87691 |   |
| 14375.00062 |             |             |             |             |   |
| COX18       | COX18       | 621.8818787 | 704.2689532 | 557.5300681 |   |
| 605.1289747 |             |             |             |             |   |
| CCDC107     | CCDC107     | 1891.687591 | 1553.793378 | 1195.344466 |   |
| 1580.004503 |             |             |             |             |   |
| ARSK        | ARSK        | 336.4620549 | 349.493468  | 607.7077743 |   |
| 416.8230377 |             |             |             |             |   |
| ZMYND15     | ZMYND15     | 7.291747321 | 0           | 1.961520177 |   |
| CCDC43      | CCDC43      | 3192.743648 | 2583.786722 | 2003.763065 |   |
| 2354.804973 |             |             |             |             |   |
| APOBEC4     | APOBEC4     | 0           | 1.115060136 | 0           |   |
| PPAPDC2     | PPAPDC2     | 491.6721051 | 500.0309567 | 675.7264426 |   |
| 656.1284993 |             |             |             |             |   |
| CATIP       | CATIP       | 1.041678189 | 2.641008574 | 6.690360818 |   |
| 2.942280266 |             |             |             |             |   |
| ZNF700      | ZNF700      | 738.5498358 | 720.9953408 | 1097.219174 |   |
| 960.1641268 |             |             |             |             |   |
| FRMD6-AS1   | FRMD6-AS1   |             | 17.70852921 | 17.60672383 |   |
| 70.24878858 | 39.23040355 |             |             |             |   |
| MGAT4B      | MGAT4B      | 2566.695057 | 2467.582345 | 2641.577463 |   |
| 1729.080036 |             |             |             |             |   |
| CHSY3       | CHSY3       | 0           | 1.115060136 | 0           |   |
| PRRT2       | PRRT2       | 2.083356377 | 8.803361914 | 11.15060136 |   |
| 20.59596186 |             |             |             |             |   |
| WFIKKN1     | WFIKKN1     | 1.041678189 | 2.641008574 | 12.2656615  |   |
| 1.961520177 |             |             |             |             |   |
| FAM167A     | FAM167A     | 148.959981  | 263.2205212 | 53.52288654 |   |
| 124.5565313 |             |             |             |             |   |
| DHX29       | DHX29       | 1986.480306 | 1637.425316 | 1903.407653 |   |
| 1641.792388 |             |             |             |             |   |
| DPPA4       | DPPA4       | 0           | 7.042689532 | 6.690360818 | 0 |
| GGNBP2      | GGNBP2      | 4899.012521 | 4118.212704 | 5021.115794 |   |
| 4383.016836 |             |             |             |             |   |
| ATP8B4      | ATP8B4      | 734.383123  | 1022.950654 | 452.7144153 |   |
| 658.0900195 |             |             |             |             |   |
| ZNF672      | ZNF672      | 3828.167343 | 3438.593164 | 3464.491843 |   |
| 3554.274561 |             |             |             |             |   |
| ADD1        | ADD1        | 9248.018959 | 14820.45978 | 7397.308944 |   |
| 9528.084261 |             |             |             |             |   |
| GEMIN8      | GEMIN8      | 815.6340218 | 492.107931  | 691.3372845 |   |
| 860.1265978 |             |             |             |             |   |
| ALKBH5      | ALKBH5      | 7941.754511 | 8615.850306 | 9540.454526 |   |

|             |          |             |             |             |
|-------------|----------|-------------|-------------|-------------|
| 8621.861939 |          |             |             |             |
| PPFIA4      | PPFIA4   | 0           | 28.17075813 | 0           |
| 91.21068825 |          |             |             |             |
| CD226       | CD226    | 4176.087858 | 3076.774989 | 3511.324369 |
| 3646.46601  |          |             |             |             |
| CNN2        | CNN2     | 30679.50601 | 30259.79591 | 9520.383443 |
| 16265.90607 |          |             |             |             |
| CCR6        | CCR6     | 809.3839526 | 257.9385041 | 1494.180583 |
| 1809.502364 |          |             |             |             |
| GP5         | GP5      | 51.04223125 | 73.06790389 | 97.01023186 |
| 63.74940576 |          |             |             |             |
| AKT1        | AKT1     | 10102.19507 | 7089.34735  | 5856.295836 |
| 7745.06242  |          |             |             |             |
| TUBB4B      | TUBB4B   | 33869.12463 | 28241.18502 | 19688.61683 |
| 25408.55162 |          |             |             |             |
| CYB5A       | CYB5A    | 1427.099119 | 1355.717735 | 2066.206433 |
| 1845.790487 |          |             |             |             |
| ATOX1       | ATOX1    | 2152.107138 | 2924.476828 | 2107.463658 |
| 2109.614951 |          |             |             |             |
| FEZ2        | FEZ2     | 127.084739  | 253.5368231 | 115.9662542 |
| 101.0182891 |          |             |             |             |
| AURKB       | AURKB    | 8451.135145 | 8801.601242 | 4279.600803 |
| 6809.417296 |          |             |             |             |
| THOC7       | THOC7    | 3459.413265 | 4025.777403 | 2602.550358 |
| 3160.989766 |          |             |             |             |
| PAQR4       | PAQR4    | 4436.507406 | 5084.821842 | 1980.346802 |
| 3178.643447 |          |             |             |             |
| SLC43A2     | SLC43A2  | 122.9180263 | 117.9650497 | 282.1102145 |
| 92.19144833 |          |             |             |             |
| DDX24       | DDX24    | 13476.19073 | 10151.15662 | 15906.33284 |
| 13244.18424 |          |             |             |             |
| PPAPDC3     | PPAPDC3  | 2.083356377 | 0           | 0           |
| 10.78836098 |          |             |             |             |
| CDH24       | CDH24    | 40.62544936 | 95.95664487 | 53.52288654 |
| 50.99952461 |          |             |             |             |
| GNG10       | GNG10    | 2710.446647 | 2267.746029 | 1720.53779  |
| 1875.21329  |          |             |             |             |
| CNTN6       | CNTN6    | 0           | 0           | 3.345180409 |
| 0           |          |             |             |             |
| SPATA6L     | SPATA6L  | 17.70852921 | 14.96571525 | 18.95602232 |
| 36.28812328 |          |             |             |             |
| CCDC183     | CCDC183  | 50.00055306 | 65.14487817 | 105.9307129 |
| 72.57624656 |          |             |             |             |
| GJB6        | GJB6     | 167.7101884 | 365.3395194 | 297.7210564 |
| 172.6137756 |          |             |             |             |
| LEMD2       | LEMD2    | 2548.986528 | 3035.399188 | 2549.027472 |
| 2733.378367 |          |             |             |             |
| C15orf61    | C15orf61 |             | 290.6282146 | 301.9553137 |
| 586.5216317 | 442.3228 |             |             |             |
| USP48       | USP48    | 5942.774067 | 5849.833992 | 3782.283982 |
| 5442.237732 |          |             |             |             |
| RHOC        | RHOC     | 2666.696163 | 2725.520849 | 1481.914921 |
| 2094.903549 |          |             |             |             |



|             |             |             |             |             |
|-------------|-------------|-------------|-------------|-------------|
| CDIP1       | CDIP1       | 1760.436139 | 3595.293006 | 1717.19261  |
| 1757.522079 |             |             |             |             |
| LY6E        | LY6E        | 13816.81949 | 11102.80005 | 13967.24327 |
| 6932.993067 |             |             |             |             |
| SH3KBP1     | SH3KBP1     | 8774.055383 | 7960.880179 | 6614.536728 |
| 7108.549123 |             |             |             |             |
| C3orf20     | C3orf20     | 5.208390943 | 5.282017149 | 1.115060136 |
| 2.942280266 |             |             |             |             |
| ABTB2       | ABTB2       | 485.4220359 | 161.9818592 | 448.2541748 |
| 162.8061747 |             |             |             |             |
| MBTPS2      | MBTPS2      | 1643.768182 | 1162.924109 | 1374.869148 |
| 1277.930396 |             |             |             |             |
| ASB3        | ASB3        | 2234.399715 | 1695.527505 | 1454.038418 |
| 1625.119467 |             |             |             |             |
| ZNF618      | ZNF618      | 6.250069132 | 22.88874098 | 23.41626286 |
| 11.76912106 |             |             |             |             |
| LCNL1       | LCNL1       | 0           | 4.460240545 | 0.980760089 |
| 0           |             |             |             |             |
| COPB1       | COPB1       | 19251.25461 | 16499.2609  | 15504.91119 |
| 17573.25927 |             |             |             |             |
| SLM01       | SLM01       | 8.33342551  | 23.76907717 | 2.230120273 |
| 6.865320621 |             |             |             |             |
| CD164       | CD164       | 32352.44118 | 26279.79599 | 38360.29881 |
| 27945.77797 |             |             |             |             |
| TLL2        | TLL2        | 8.33342551  | 7.923025723 | 31.22168382 |
| 1.961520177 |             |             |             |             |
| RBMS1       | RBMS1       | 3641.706948 | 2454.377302 | 5886.402459 |
| 4212.364581 |             |             |             |             |
| CCR3        | CCR3        | 518.755738  | 353.0148128 | 68.01866831 |
| 55.90332505 |             |             |             |             |
| PILRB       | PILRB       | 671.8824317 | 845.1227438 | 743.7451109 |
| 1097.470539 |             |             |             |             |
| GTF3C4      | GTF3C4      | 1313.556196 | 1652.391031 | 1369.293847 |
| 1143.566263 |             |             |             |             |
| STYXL1      | STYXL1      | 2416.693398 | 1943.782311 | 1638.02334  |
| 1503.505216 |             |             |             |             |
| C20orf197   | C20orf197   |             | 31.25034566 | 62.50386959 |
| 3.345180409 | 35.30736319 |             |             |             |
| ZNF143      | ZNF143      | 2635.445817 | 2239.575271 | 2814.411784 |
| 2394.035376 |             |             |             |             |
| NEK9        | NEK9        | 903.1349896 | 2389.232424 | 1328.036622 |
| 1294.603317 |             |             |             |             |
| ZAN         | ZAN         | 0           | 3.521344766 | 0.980760089 |
| 0           |             |             |             |             |
| TLR1        | TLR1        | 496.880496  | 290.5109432 | 521.8481438 |
| 202.0365783 |             |             |             |             |
| PDCL        | PDCL        | 2040.647572 | 2123.370894 | 1756.219715 |
| 1878.15557  |             |             |             |             |
| NUP98       | NUP98       | 11893.88156 | 15419.96873 | 11526.37663 |
| 11908.389   |             |             |             |             |
| NFIL3       | NFIL3       | 3055.242127 | 2131.293919 | 2874.625031 |
| 4554.649852 |             |             |             |             |

|             |             |             |             |             |             |
|-------------|-------------|-------------|-------------|-------------|-------------|
| TARBP1      | TARBP1      | 1313.556196 | 1766.834736 | 3218.063553 |             |
| 2107.653431 |             |             |             |             |             |
| SNX11       | SNX11       | 3423.996206 | 1959.628362 | 3206.912952 |             |
| 2554.880031 |             |             |             |             |             |
| CSRP3       | CSRP3       | 0           | 0.880336191 | 0           |             |
| TMX3        | TMX3        | 4127.128984 | 4513.483654 | 2538.99193  |             |
| 3453.256272 |             |             |             |             |             |
| ERLEC1      | ERLEC1      | 4959.429856 | 3521.344766 | 3388.667754 |             |
| 3469.929194 |             |             |             |             |             |
| ERMAP       | ERMAP       | 358.3372969 | 408.4759928 | 233.0475685 |             |
| 341.3045109 |             |             |             |             |             |
| CXorf57     | CXorf57     | 432.2964483 | 561.6544901 | 471.6704376 |             |
| 679.6667414 |             |             |             |             |             |
| CSF2        | CSF2        | 7904.254096 | 5957.235007 | 4294.096585 |             |
| 4795.916834 |             |             |             |             |             |
| FKBP1A      | FKBP1A      | 3469.830047 | 8541.902066 | 2417.450375 |             |
| 3082.528959 |             |             |             |             |             |
| EOMES       | EOMES       | 298.9616402 | 153.1784973 | 790.5776366 |             |
| 268.7282643 |             |             |             |             |             |
| MIPOL1      | MIPOL1      | 0           | 0.880336191 | 0           |             |
| ARHGEF10L   | ARHGEF10L   | 0           | 0           | 1.115060136 | 0           |
| BRMS1L      | BRMS1L      | 517.7140598 | 283.4682536 | 1100.564354 |             |
| 493.3223246 |             |             |             |             |             |
| SLC10A7     | SLC10A7     | 1237.513688 | 1019.42931  | 1195.344466 |             |
| 1040.586454 |             |             |             |             |             |
| TCHP        | TCHP        | 1513.558408 | 1000.94225  | 952.2613564 |             |
| 845.4151964 |             |             |             |             |             |
| ZDHHC18     | ZDHHC18     | 2796.905937 | 3294.218028 | 1949.125118 |             |
| 2141.980034 |             |             |             |             |             |
| RHBDD1      | RHBDD1      | 2036.480859 | 1808.210537 | 1954.700419 |             |
| 2157.672195 |             |             |             |             |             |
| GJA9-MYCBP  | GJA9-MYCBP  |             | 7117.787063 | 5846.312647 |             |
| 5535.158516 | 5761.965521 |             |             |             |             |
| SLC25A53    | SLC25A53    |             | 233.3359143 | 156.6998421 |             |
| 250.8885307 | 166.7292151 |             |             |             |             |
| TUBGCP6     | TUBGCP6     | 1527.100225 | 3273.08996  | 2505.540126 |             |
| 3064.875277 |             |             |             |             |             |
| VPS11       | VPS11       | 2998.991505 | 2649.811936 | 3535.855692 |             |
| 3122.740122 |             |             |             |             |             |
| POLDIP2     | POLDIP2     | 13305.3555  | 9366.777077 | 10295.35024 |             |
| 10621.63176 |             |             |             |             |             |
| EIF5B       | EIF5B       | 3884.417966 | 4133.178419 | 4374.380915 |             |
| 4252.575744 |             |             |             |             |             |
| CEBPD       | CEBPD       | 76.04250777 | 264.9811936 | 47.94758586 |             |
| 140.2486927 |             |             |             |             |             |
| MAP3K8      | MAP3K8      | 1673.976849 | 1765.9544   | 1339.187224 |             |
| 1155.335384 |             |             |             |             |             |
| ICAM5       | ICAM5       | 2.083356377 | 7.042689532 | 0           | 0.980760089 |
| SPINT2      | SPINT2      | 981.2608538 | 418.1596909 | 6807.442132 |             |
| 2435.2273   |             |             |             |             |             |

|              |              |             |               |               |
|--------------|--------------|-------------|---------------|---------------|
| CLDN1        | CLDN1        | 17.70852921 | 13.20504287   | 11.15060136   |
| 65.71092594  |              |             |               |               |
| CKMT1B       | CKMT1B       | 1.041678189 | 0.880336191   | 0 1.961520177 |
| ERMN         | ERMN         | 29.16698928 | 30.8117667    | 32.33674395   |
| 39.23040355  |              |             |               |               |
| TMEM167B     | TMEM167B     |             | 1360.431714   | 1791.48415    |
| 3067.530435  |              | 2207.69096  |               |               |
| LINC01424    | LINC01424    |             | 7.291747321   | 17.60672383   |
| 3.345180409  |              | 9.807600887 |               |               |
| LOC101928791 | LOC101928791 |             | 3.125034566   | 0.880336191   |
| 1.115060136  |              | 7.846080709 |               |               |
| LOC101927769 | LOC101927769 |             | 0 0           | 0 0.980760089 |
| IFITM4P      | IFITM4P      | 1.041678189 | 0 0           | 0             |
| PPIL6        | PPIL6        | 167.7101884 | 112.6830325   | 146.0728779   |
| 120.6334909  |              |             |               |               |
| ARMCX2       | ARMCX2       | 20.83356377 | 53.70050768   | 139.382517    |
| 131.4218519  |              |             |               |               |
| SIGMAR1      | SIGMAR1      | 9153.226244 | 7098.150712   | 9725.554508   |
| 9465.315616  |              |             |               |               |
| RNASE4       | RNASE4       | 140.6265555 | 76.58924866   | 120.4264947   |
| 80.42232727  |              |             |               |               |
| S100G        | S100G        | 0 0         | 1.115060136   | 0.980760089   |
| MAP2K4       | MAP2K4       | 4296.922528 | 3389.294337   | 4439.054402   |
| 3838.694987  |              |             |               |               |
| TLR4         | TLR4         | 8.33342551  | 0 0           | 0             |
| SMARCA1      | SMARCA1      | 0 0         | 39.02710477   | 39.23040355   |
| NCDN         | NCDN         | 2027.105755 | 2907.75044    | 1803.05224    |
| 2193.960318  |              |             |               |               |
| C10TNF3      | C10TNF3      | 27.08363291 | 36.97412004   | 23.41626286   |
| 48.05724434  |              |             |               |               |
| AMN          | AMN          | 0 0         | 36.7969845    | 33.34584301   |
| LOC101927153 | LOC101927153 |             | 0 3.521344766 | 0             |
| 1.961520177  |              |             |               |               |
| CDA          | CDA          | 4.166712755 | 13.20504287   | 0 0           |
| CD97         | CD97         | 7717.7937   | 7713.505709   | 9601.782833   |
| 15524.45144  |              |             |               |               |
| SLC19A1      | SLC19A1      | 4470.882786 | 4568.064497   | 2244.616054   |
| 3349.295703  |              |             |               |               |
| ZNF804A      | ZNF804A      | 0 0         | 0 1.961520177 |               |
| DND1         | DND1         | 812.5089872 | 676.098195    | 783.8872758   |
| 831.6845552  |              |             |               |               |
| ITGAV        | ITGAV        | 446.879943  | 640.0044112   | 538.5740458   |
| 443.3035601  |              |             |               |               |
| MMGT1        | MMGT1        | 590.631533  | 1170.847135   | 830.7198015   |
| 813.0501135  |              |             |               |               |
| 10-Sep       | 10-Sep       | 14.58349464 | 58.10218863   | 70.24878858   |
| 197.1327778  |              |             |               |               |
| COL23A1      | COL23A1      | 4.166712755 | 10.5640343    | 0 0.980760089 |
| SYT15        | SYT15        | 2.083356377 | 3.521344766   | 0 6.865320621 |
| SHPRH        | SHPRH        | 1242.722079 | 1284.410503   | 1355.913126   |

|             |           |             |             |             |             |
|-------------|-----------|-------------|-------------|-------------|-------------|
| 1210.257949 |           |             |             |             |             |
| NCBP2       | NCBP2     | 8365.717533 | 6315.531837 | 8881.453985 |             |
| 9041.627257 |           |             |             |             |             |
| SNAPC3      | SNAPC3    | 3202.118752 | 2389.232424 | 2104.118477 |             |
| 1916.405213 |           |             |             |             |             |
| SMAD2       | SMAD2     | 7932.379407 | 6562.906307 | 8698.584123 |             |
| 7101.683802 |           |             |             |             |             |
| DIP2A       | DIP2A     | 2273.983486 | 2983.459353 | 2042.79017  |             |
| 2113.537991 |           |             |             |             |             |
| QARS        | QARS      | 6684.448937 | 5286.41883  | 4204.891774 |             |
| 5627.601389 |           |             |             |             |             |
| TEL02       | TEL02     | 3328.161813 | 2693.828746 | 2831.137686 |             |
| 2853.031098 |           |             |             |             |             |
| SNRK-AS1    | SNRK-AS1  |             | 1755.227748 | 2003.645172 |             |
| 2201.128709 |           | 1720.253196 |             |             |             |
| MIR147B     | MIR147B   | 5.208390943 | 6.16235334  | 10.03554123 |             |
| 16.67292151 |           |             |             |             |             |
| LINC00623   | LINC00623 |             | 58.33397857 | 44.01680957 |             |
| 277.6499739 |           | 155.9408541 |             |             |             |
| GATA3-AS1   | GATA3-AS1 |             | 20.83356377 | 14.08537906 |             |
| 20.07108245 |           | 0.980760089 |             |             |             |
| ARL6IP6     | ARL6IP6   | 5050.055859 | 3782.804615 | 3655.167127 |             |
| 2874.60782  |           |             |             |             |             |
| FAM96B      | FAM96B    | 4166.712755 | 5678.168435 | 3548.121354 |             |
| 4207.46078  |           |             |             |             |             |
| LOC731157   | LOC731157 |             | 12.50013826 | 23.76907717 |             |
| 41.25722504 |           | 10.78836098 |             |             |             |
| GOLGA6L4    | GOLGA6L4  |             | 2.083356377 | 3.521344766 | 0           |
| 2.942280266 |           |             |             |             |             |
| CCDC74A     | CCDC74A   | 89.58432423 | 78.34992104 | 66.90360818 |             |
| 68.65320621 |           |             |             |             |             |
| NFIC        | NFIC      | 151.0433374 | 226.2464012 | 441.563814  |             |
| 463.8995219 |           |             |             |             |             |
| HIST1H4B    | HIST1H4B  |             | 14.58349464 | 44.89714576 |             |
| 23.41626286 |           | 14.71140133 |             |             |             |
| HIST1H4H    | HIST1H4H  |             | 39.58377117 | 41.375801   |             |
| 32.33674395 |           | 23.53824213 |             |             |             |
| HIST1H4C    | HIST1H4C  |             | 34012.87622 | 53312.27942 |             |
| 25120.07475 |           | 28720.57844 |             |             |             |
| HIST1H4K    | HIST1H4K  |             | 16.66685102 | 34.33311147 |             |
| 11.15060136 |           | 15.69216142 |             |             |             |
| PTPRM       | PTPRM     | 288.5448583 | 649.6881093 | 427.0680322 |             |
| 860.1265978 |           |             |             |             |             |
| FHOD1       | FHOD1     | 417.7129537 | 1236.872349 | 548.609587  |             |
| 549.2256497 |           |             |             |             |             |
| DNAJC15     | DNAJC15   | 5029.222295 | 5333.076648 | 3823.541207 |             |
| 4127.038453 |           |             |             |             |             |
| PRELID1     | PRELID1   | 26232.58183 | 16940.30933 | 16825.1424  |             |
| 17141.72483 |           |             |             |             |             |
| NOS2        | NOS2      | 0           | 5.282017149 | 0           | 21.57672195 |

|             |            |             |             |             |             |
|-------------|------------|-------------|-------------|-------------|-------------|
| FHIT        | FHIT       | 112.5012444 | 125.0077392 | 183.9849225 |             |
| 306.9779078 |            |             |             |             |             |
| C8orf88     | C8orf88    | 61.45901313 | 127.6487478 | 157.2234792 |             |
| 126.5180514 |            |             |             |             |             |
| PYCR1       | PYCR1      | 3262.536087 | 2444.693604 | 3889.329755 |             |
| 3438.544871 |            |             |             |             |             |
| STOML2      | STOML2     | 12904.3094  | 9424.879266 | 8618.299793 |             |
| 9997.868344 |            |             |             |             |             |
| OR5F1       | OR5F1      | 0           | 1.115060136 | 0           |             |
| ITGAL       | ITGAL      | 27572.17998 | 29870.68731 | 14182.44987 |             |
| 18975.7462  |            |             |             |             |             |
| HPD         | HPD        | 18.7502074  | 9.683698106 | 40.14216491 |             |
| 21.57672195 |            |             |             |             |             |
| PTBP1       | PTBP1      | 21935.6593  | 24162.58745 | 19954.00114 |             |
| 21018.66946 |            |             |             |             |             |
| TRAT1       | TRAT1      | 10095.945   | 8783.994518 | 9548.259947 |             |
| 5558.948183 |            |             |             |             |             |
| ZNF2        | ZNF2       | 323.9619167 | 287.8699346 | 476.1306782 |             |
| 457.0342013 |            |             |             |             |             |
| ETFB        | ETFB       | 3996.91921  | 3336.474166 | 2727.437093 |             |
| 3597.428005 |            |             |             |             |             |
| BAMBI       | BAMBI      | 31.25034566 | 7.042689532 | 93.66505145 |             |
| 7.846080709 |            |             |             |             |             |
| MAPK10      | MAPK10     | 1.041678189 | 1.760672383 | 0           | 4.903800443 |
| PMPCA       | PMPCA      | 8044.880651 | 5305.786226 | 6012.404255 |             |
| 7578.333205 |            |             |             |             |             |
| COL6A4P2    | COL6A4P2   |             | 0           | 1.760672383 | 0           |
| LINC00173   | LINC00173  |             | 3.125034566 | 7.042689532 | 0           |
| 8.826840798 |            |             |             |             |             |
| GPR158-AS1  | GPR158-AS1 |             | 3.125034566 | 0           | 0           |
| CLUL1       | CLUL1      | 77.08418596 | 100.3583258 | 24.531323   | 0           |
| 48.05724434 |            |             |             |             |             |
| LRFN3       | LRFN3      | 9.375103698 | 88.91395534 | 45.71746559 |             |
| 30.40356275 |            |             |             |             |             |
| MFAP1       | MFAP1      | 5182.348989 | 4581.26954  | 4426.788741 |             |
| 4762.570991 |            |             |             |             |             |
| CRADD       | CRADD      | 537.5059454 | 340.6901061 | 456.0595957 |             |
| 386.4194749 |            |             |             |             |             |
| PGA5        | PGA5       | 0           | 7.805420954 | 0           |             |
| SLC35F6     | SLC35F6    | 835.4259073 | 1190.214531 | 550.8397073 |             |
| 804.2232727 |            |             |             |             |             |
| WASL        | WASL       | 250.0027653 | 368.8608642 | 514.0427228 |             |
| 414.8615175 |            |             |             |             |             |
| GDF10       | GDF10      | 19.79188559 | 33.45277527 | 88.08975076 |             |
| 135.3448922 |            |             |             |             |             |
| RING1       | RING1      | 7.291747321 | 0           | 25.64638313 | 0           |
| AP3D1       | AP3D1      | 6050.06692  | 8139.588426 | 4810.369428 |             |
| 6265.095446 |            |             |             |             |             |
| DLST        | DLST       | 422.9213446 | 1378.606476 | 521.8481438 |             |
| 507.0529658 |            |             |             |             |             |

|             |         |             |             |             |             |
|-------------|---------|-------------|-------------|-------------|-------------|
| EN02        | EN02    | 3628.165131 | 3854.111846 | 4522.683913 |             |
| 6079.73179  |         |             |             |             |             |
| FRK         | FRK     | 13.54181645 | 5.282017149 | 0           | 0           |
| GNS         | GNS     | 3401.079286 | 3374.328622 | 5928.774745 |             |
| 4244.729664 |         |             |             |             |             |
| ESM1        | ESM1    | 2.083356377 | 15.84605145 | 0           | 2.942280266 |
| RAB34       | RAB34   | 1256.263896 | 671.6965141 | 660.1156007 |             |
| 423.6883583 |         |             |             |             |             |
| EVA1B       | EVA1B   | 303.1283529 | 233.2890907 | 70.24878858 |             |
| 147.1140133 |         |             |             |             |             |
| NUCB2       | NUCB2   | 2032.314146 | 4797.832243 | 3900.480357 |             |
| 3310.065299 |         |             |             |             |             |
| QKI         | QKI     | 3059.40884  | 2849.648252 | 3809.045425 |             |
| 2917.761264 |         |             |             |             |             |
| SRSF7       | SRSF7   | 23147.13103 | 20268.86047 | 19990.79812 |             |
| 20529.27018 |         |             |             |             |             |
| BAG1        | BAG1    | 3287.536364 | 2667.41866  | 3795.664704 |             |
| 3070.759838 |         |             |             |             |             |
| PTTG2       | PTTG2   | 6.250069132 | 3.521344766 | 6.690360818 |             |
| 2.942280266 |         |             |             |             |             |
| E4F1        | E4F1    | 1693.768735 | 1248.316719 | 1635.79322  |             |
| 1696.714953 |         |             |             |             |             |
| FUT4        | FUT4    | 470.8385413 | 559.0134816 | 398.0764686 |             |
| 485.4762439 |         |             |             |             |             |
| HBB         | HBB     | 0           | 3.345180409 | 0           |             |
| FUT2        | FUT2    | 6.250069132 | 19.36739621 | 22.30120273 |             |
| 30.40356275 |         |             |             |             |             |
| CYP1A1      | CYP1A1  | 171.8769011 | 0           | 483.9360991 | 101.9990492 |
| GPATCH4     | GPATCH4 | 4751.094219 | 2541.530585 | 4670.986911 |             |
| 3635.677649 |         |             |             |             |             |
| MT1M        | MT1M    | 0           | 0           | 1.961520177 |             |
| IL5RA       | IL5RA   | 3.125034566 | 6.16235334  | 24.531323   | 0           |
| SNRNP27     | SNRNP27 | 4012.544383 | 3273.08996  | 3067.530435 |             |
| 2833.415896 |         |             |             |             |             |
| OSBPL3      | OSBPL3  | 6495.905185 | 5520.588257 | 3454.456302 |             |
| 4370.266955 |         |             |             |             |             |
| SNORD11     | SNORD11 | 20.83356377 | 20.2477324  | 25.64638313 |             |
| 11.76912106 |         |             |             |             |             |
| SOAT1       | SOAT1   | 10389.69825 | 7654.523185 | 9396.611768 |             |
| 8500.247688 |         |             |             |             |             |
| RHN01       | RHN01   | 5752.146958 | 4218.571029 | 3906.055657 |             |
| 4277.094747 |         |             |             |             |             |
| NARF        | NARF    | 9068.850311 | 8879.070827 | 5069.063379 |             |
| 7405.71943  |         |             |             |             |             |
| PEX5        | PEX5    | 515.6307034 | 1156.761756 | 1220.990849 |             |
| 1527.043458 |         |             |             |             |             |
| ZNF8        | ZNF8    | 433.3381265 | 385.5872518 | 382.4656267 |             |
| 425.6498785 |         |             |             |             |             |
| HIC1        | HIC1    | 515.6307034 | 637.3634026 | 299.9511767 |             |
| 320.708549  |         |             |             |             |             |

|             |             |               |             |               |
|-------------|-------------|---------------|-------------|---------------|
| GNAI3       | GNAI3       | 17061.64705   | 12105.50297 | 12064.95067   |
| 12068.25289 |             |               |             |               |
| KCNH6       | KCNH6       | 1.041678189   | 2.641008574 | 0 3.923040355 |
| LINC01107   | LINC01107   |               | 0 0         | 0 1.961520177 |
| CCDC167     | CCDC167     | 3438.579701   | 4911.395612 | 1872.185969   |
| 2636.283118 |             |               |             |               |
| ZNF229      | ZNF229      | 55.208944     | 39.61512861 | 185.0999826   |
| 35.30736319 |             |               |             |               |
| PRR18       | PRR18       | 0 0           | 6.690360818 | 0             |
| HRH2        | HRH2        | 339.5870895   | 970.130483  | 435.9885133   |
| 804.2232727 |             |               |             |               |
| TIA1        | TIA1        | 5609.437046   | 4996.788223 | 4500.38271    |
| 4285.921587 |             |               |             |               |
| IZUM02      | IZUM02      | 2.083356377   | 0 0         | 0             |
| ACSBG2      | ACSBG2      | 10.41678189   | 7.923025723 | 17.84096218   |
| 11.76912106 |             |               |             |               |
| IPPK        | IPPK        | 2554.194919   | 2354.899312 | 1774.060677   |
| 2124.326352 |             |               |             |               |
| PDDC1       | PDDC1       | 789.592067    | 996.5405687 | 687.9921041   |
| 893.4724408 |             |               |             |               |
| DNHD1       | DNHD1       | 156.2517283   | 341.5704423 | 362.3945443   |
| 328.5546297 |             |               |             |               |
| DZANK1      | DZANK1      | 122.9180263   | 68.66622293 | 113.7361339   |
| 113.7681703 |             |               |             |               |
| 12-Sep      | 12-Sep      | 0 0           | 3.345180409 | 0             |
| C5orf63     | C5orf63     | 355.2122623   | 303.715986  | 357.9343037   |
| 427.6113987 |             |               |             |               |
| ZNF879      | ZNF879      | 286.4615019   | 118.8453858 | 801.728238    |
| 426.6306386 |             |               |             |               |
| RBM14       | RBM14       | 11577.21139   | 11427.6441  | 9858.246665   |
| 10957.05171 |             |               |             |               |
| TEAD3       | TEAD3       | 12.50013826   | 45.77748195 | 32.33674395   |
| 54.92256497 |             |               |             |               |
| PFKFB3      | PFKFB3      | 3532.330738   | 4980.061835 | 3346.295469   |
| 5429.487851 |             |               |             |               |
| ZNF541      | ZNF541      | 23.95859834   | 29.93143051 | 32.33674395   |
| 27.46128248 |             |               |             |               |
| OAS1        | OAS1        | 15899.13419   | 5314.589588 | 19817.9638    |
| 5540.313741 |             |               |             |               |
| SNRPD2      | SNRPD2      | 19373.13095   | 18936.91181 | 15461.42385   |
| 17308.45404 |             |               |             |               |
| FBXW10      | FBXW10      | 0 1.760672383 | 3.345180409 | 20.59596186   |
| MIR6079     | MIR6079     | 3.125034566   | 0.880336191 | 12.2656615    |
| 8.826840798 |             |               |             |               |
| CHCHD7      | CHCHD7      | 2740.655314   | 2694.709082 | 3321.764146   |
| 3249.258174 |             |               |             |               |
| ARHGEF37    | ARHGEF37    |               | 37.50041479 | 29.93143051   |
| 22.30120273 | 87.28764789 |               |             |               |
| CAPSL       | CAPSL       | 2.083356377   | 7.042689532 | 14.49578177   |
| 15.69216142 |             |               |             |               |

|              |              |             |             |             |
|--------------|--------------|-------------|-------------|-------------|
| GOLGA7B      | GOLGA7B      | 22.91692015 | 51.93983529 | 32.33674395 |
| 18.63444168  |              |             |             |             |
| ZBTB1        | ZBTB1        | 4000.044245 | 4069.794213 | 4539.409815 |
| 4657.629661  |              |             |             |             |
| NUTM2A       | NUTM2A       | 0           | 3.521344766 | 0           |
| SMARCAL1     | SMARCAL1     |             | 2922.948997 | 2369.865027 |
| 2323.785324  |              | 2611.764116 |             |             |
| REG4         | REG4         | 187.502074  | 192.7936259 | 43.48734531 |
| 97.09524878  |              |             |             |             |
| CUL9         | CUL9         | 660.4239716 | 1603.092205 | 844.1005232 |
| 1144.547023  |              |             |             |             |
| LOC101928696 | LOC101928696 |             | 2.083356377 | 1.760672383 |
| 3.345180409  |              | 3.923040355 |             |             |
| KIAA0513     | KIAA0513     |             | 255.2111562 | 376.7838899 |
| 470.5553775  |              | 434.4767193 |             |             |
| CYTH1        | CYTH1        | 22609.62509 | 19477.43824 | 17496.4086  |
| 15996.19705  |              |             |             |             |
| SLC30A6      | SLC30A6      | 4402.132025 | 3595.293006 | 3475.642445 |
| 3505.236557  |              |             |             |             |
| GRIK1        | GRIK1        | 6.250069132 | 1.760672383 | 7.805420954 |
| 16.67292151  |              |             |             |             |
| HAP1         | HAP1         | 9.375103698 | 3.521344766 | 8.92048109  |
| 1.961520177  |              |             |             |             |
| SULT2B1      | SULT2B1      | 21.87524196 | 22.00840479 | 32.33674395 |
| 33.34584301  |              |             |             |             |
| FAM46A       | FAM46A       | 138.5431991 | 78.34992104 | 1086.068573 |
| 282.4589055  |              |             |             |             |
| AG04         | AG04         | 671.8824317 | 1559.075395 | 1195.344466 |
| 1294.603317  |              |             |             |             |
| ZNF281       | ZNF281       | 3470.871725 | 3595.293006 | 3547.006293 |
| 3703.350095  |              |             |             |             |
| WBP2         | WBP2         | 3660.457155 | 4344.459105 | 5200.640476 |
| 3965.213038  |              |             |             |             |
| IFT46        | IFT46        | 911.4684151 | 688.4229017 | 1035.890867 |
| 1089.624459  |              |             |             |             |
| ZNF267       | ZNF267       | 4501.091453 | 5003.830912 | 9272.840093 |
| 7196.817531  |              |             |             |             |
| MAPK3        | MAPK3        | 147.9183028 | 819.5929942 | 167.2590204 |
| 227.5363406  |              |             |             |             |
| MKL1         | MKL1         | 989.5942793 | 2059.106352 | 992.4035213 |
| 1030.778853  |              |             |             |             |
| LOC101929089 | LOC101929089 |             | 76.04250777 | 108.2813515 |
| 132.6921562  |              | 46.09572417 |             |             |
| CDCA2        | CDCA2        | 5072.972779 | 4795.191235 | 2187.747987 |
| 2954.049387  |              |             |             |             |
| SLC39A4      | SLC39A4      | 635.4236951 | 650.5684455 | 570.9107898 |
| 904.2608018  |              |             |             |             |
| CEP72        | CEP72        | 976.0524628 | 754.4481161 | 816.2240197 |
| 777.7427503  |              |             |             |             |
| STK10        | STK10        | 15706.42373 | 13569.50205 | 10500.5213  |



|                 |             |             |             |             |   |
|-----------------|-------------|-------------|-------------|-------------|---|
| 9720.313239     |             |             |             |             |   |
| DDX47 DDX47     | 8933.432146 | 5968.679378 | 8002.786598 |             |   |
| 7559.698763     |             |             |             |             |   |
| KRTAP5-10       | KRTAP5-10   | 0           | 0.880336191 | 0           | 0 |
| USP16 USP16     | 3432.329632 | 3382.251648 | 3435.50028  |             |   |
| 2959.933948     |             |             |             |             |   |
| OGDHL OGDHL     | 14.58349464 | 14.08537906 | 11.15060136 |             | 0 |
| ZNF175 ZNF175   | 189.5854303 | 193.6739621 | 314.4469584 |             |   |
| 306.9779078     |             |             |             |             |   |
| VEZF1 VEZF1     | 2146.898747 | 2507.197473 | 3471.182204 |             |   |
| 2446.015661     |             |             |             |             |   |
| SNAP29 SNAP29   | 4666.718285 | 4015.213369 | 3835.806869 |             |   |
| 3598.408765     |             |             |             |             |   |
| VAMP3 VAMP3     | 1526.058546 | 1416.460932 | 1894.487172 |             |   |
| 1473.101653     |             |             |             |             |   |
| ZNF850 ZNF850   | 71.87579502 | 114.4437049 | 250.8885307 |             |   |
| 125.5372913     |             |             |             |             |   |
| SLC4A7 SLC4A7   | 2377.109627 | 4360.305156 | 1940.204637 |             |   |
| 2303.805448     |             |             |             |             |   |
| CATIP-AS1       | CATIP-AS1   | 1.041678189 | 4.401680957 |             |   |
| 3.345180409     | 4.903800443 |             |             |             |   |
| ZNF302 ZNF302   | 934.3853353 | 1051.121413 | 1995.957644 |             |   |
| 1846.771247     |             |             |             |             |   |
| HDAC10 HDAC10   | 429.1714137 | 1087.215196 | 236.3927489 |             |   |
| 509.9952461     |             |             |             |             |   |
| AGPAT2 AGPAT2   | 856.2594711 | 733.3200475 | 1122.865557 |             |   |
| 1250.469113     |             |             |             |             |   |
| SATL1 SATL1     | 21.87524196 | 32.57243908 | 13.38072164 |             |   |
| 26.48052239     |             |             |             |             |   |
| AP1G1 AP1G1     | 6481.32169  | 7425.635775 | 5182.799513 |             |   |
| 5767.850081     |             |             |             |             |   |
| FAM86B1 FAM86B1 | 6.250069132 | 25.52974955 | 13.38072164 |             |   |
| 61.78788559     |             |             |             |             |   |
| MEF2C MEF2C     | 0           | 77.46958485 | 0           | 98.07600887 |   |
| LEPROT LEPROT   | 2765.655591 | 2206.122496 | 2808.836483 |             |   |
| 2153.749155     |             |             |             |             |   |
| DOCK10 DOCK10   | 6091.734048 | 9799.902483 | 9075.474449 |             |   |
| 9004.358374     |             |             |             |             |   |
| C1orf21 C1orf21 | 100.0011061 | 331.8867442 | 71.36384872 |             |   |
| 109.8451299     |             |             |             |             |   |
| PGM2 PGM2       | 4383.381818 | 3472.926275 | 3037.423811 |             |   |
| 3636.658409     |             |             |             |             |   |
| SGPP1 SGPP1     | 3896.918104 | 3200.022056 | 3467.837024 |             |   |
| 3136.470764     |             |             |             |             |   |
| C4orf46 C4orf46 | 3334.411882 | 3333.833157 | 2282.528099 |             |   |
| 2289.094047     |             |             |             |             |   |
| ELP4 ELP4       | 1642.726504 | 1314.341934 | 1190.884226 |             |   |
| 1381.890965     |             |             |             |             |   |
| VPS54 VPS54     | 3241.702523 | 3421.866776 | 2607.010599 |             |   |
| 2742.205208     |             |             |             |             |   |

|                |                |             |             |             |
|----------------|----------------|-------------|-------------|-------------|
| RNF10          | RNF10          | 18871.04207 | 16133.04104 | 13481.07705 |
| 14480.92271    |                |             |             |             |
| PLCL2          | PLCL2          | 2620.862323 | 3366.405596 | 4637.535107 |
| 2907.953663    |                |             |             |             |
| NANOS3         | NANOS3         | 0           | 5.282017149 | 7.805420954 |
| 4.903800443    |                |             |             |             |
| LRRC8B         | LRRC8B         | 3796.916998 | 3666.600237 | 3366.366551 |
| 4870.4546      |                |             |             |             |
| CNTD2          | CNTD2          | 0           | 2.641008574 | 5.575300681 |
| 0              |                |             |             | 0           |
| CNTNAP4        | CNTNAP4        | 0           | 0           | 0.980760089 |
| 0              |                |             |             |             |
| LCN2           | LCN2           | 1.041678189 | 0           | 0           |
| 0              |                |             |             |             |
| MED23          | MED23          | 3431.287954 | 3479.968965 | 2949.33406  |
| 3136.470764    |                |             |             |             |
| CDH4           | CDH4           | 10.41678189 | 14.96571525 | 60.21324736 |
| 52.96104479    |                |             |             |             |
| ZNF334         | ZNF334         | 25.00027653 | 22.00840479 | 20.07108245 |
| 8.826840798    |                |             |             |             |
| FAM73A         | FAM73A         | 547.9227273 | 495.6292758 | 692.4523446 |
| 547.2641295    |                |             |             |             |
| HSPBP1         | HSPBP1         | 3703.165961 | 3166.569281 | 2620.39132  |
| 3364.007104    |                |             |             |             |
| NDUFB8         | NDUFB8         | 19921.05368 | 18980.04829 | 12940.27288 |
| 16151.15714    |                |             |             |             |
| EXOG           | EXOG           | 1309.389483 | 1192.855539 | 922.1547327 |
| 971.9332479    |                |             |             |             |
| SDE2           | SDE2           | 3656.290442 | 3409.542069 | 3825.771328 |
| 3324.776701    |                |             |             |             |
| POLR3F         | POLR3F         | 1385.431991 | 1011.506284 | 1299.045059 |
| 1022.932772    |                |             |             |             |
| PCGF2          | PCGF2          | 200.0022122 | 141.7341268 | 149.4180583 |
| 189.2866971    |                |             |             |             |
| KIAA1257       | KIAA1257       | 0           | 7.042689532 | 0           |
| 7.846080709    |                |             |             |             |
| HNRNPUL2-BSCL2 | HNRNPUL2-BSCL2 | 3506.288783 | 3336.474166 |             |
| 2729.667214    | 2322.43989     |             |             |             |
| STX16-NPEPL1   | STX16-NPEPL1   | 2794.82258  | 2940.322879 |             |
| 2282.528099    | 2956.010907    |             |             |             |
| GNAI1          | GNAI1          | 101.0427843 | 283.4682536 | 186.2150428 |
| 308.9394279    |                |             |             |             |
| DPH6           | DPH6           | 676.0491445 | 632.0813855 | 493.9716404 |
| 713.0125845    |                |             |             |             |
| TUBB3          | TUBB3          | 65.62572589 | 662.8931522 | 11.15060136 |
| 142.2102129    |                |             |             |             |
| HSP90B1        | HSP90B1        | 46165.09397 | 41314.17746 | 32557.52586 |
| 33347.80453    |                |             |             |             |
| SGPP2          | SGPP2          | 162.5017974 | 326.604727  | 307.7565976 |
| 572.7638918    |                |             |             |             |
| ZNF326         | ZNF326         | 2267.733417 | 1766.834736 | 1719.42273  |
| 1508.409016    |                |             |             |             |
| CDK3           | CDK3           | 76.04250777 | 235.0497631 | 153.8782988 |
| 165.748455     |                |             |             |             |

|             |             |             |             |             |             |
|-------------|-------------|-------------|-------------|-------------|-------------|
| RAMP1       | RAMP1       | 441.671552  | 397.9119585 | 74.70902913 |             |
| 140.2486927 |             |             |             |             |             |
| HDGFRP2     | HDGFRP2     | 2604.195472 | 2951.76725  | 1697.121527 |             |
| 2381.285495 |             |             |             |             |             |
| ZCCHC3      | ZCCHC3      | 465.6301503 | 1063.446119 | 667.9210216 |             |
| 545.3026093 |             |             |             |             |             |
| EPG5        | EPG5        | 452.0883339 | 1450.794043 | 1280.089036 |             |
| 1072.951537 |             |             |             |             |             |
| SOGA1       | SOGA1       | 23.95859834 | 54.58084387 | 23.41626286 |             |
| 23.53824213 |             |             |             |             |             |
| H2AFY2      | H2AFY2      | 53.12558762 | 265.8615298 | 117.0813143 |             |
| 273.6320647 |             |             |             |             |             |
| CCDC122     | CCDC122     | 32.29202385 | 60.74319721 | 81.39938995 |             |
| 105.9220896 |             |             |             |             |             |
| CSAD        | CSAD        | 198.960534  | 168.1442126 | 204.0560049 |             |
| 220.67102   |             |             |             |             |             |
| ZFP36L1     | ZFP36L1     | 1912.521154 | 3140.159195 | 4001.950829 |             |
| 4704.706145 |             |             |             |             |             |
| RSRC2       | RSRC2       | 3291.703076 | 2975.536327 | 3726.530975 |             |
| 3016.818033 |             |             |             |             |             |
| ZRANB2-AS2  | ZRANB2-AS2  |             | 20.83356377 | 5.282017149 |             |
| 16.72590204 | 8.826840798 |             |             |             |             |
| RARA        | RARA        | 395.8377117 | 544.0477663 | 598.7872932 |             |
| 524.7066474 |             |             |             |             |             |
| FGFR4       | FGFR4       | 28.12531109 | 21.12806859 | 12.2656615  |             |
| 32.36508293 |             |             |             |             |             |
| NSUN2       | NSUN2       | 13284.52194 | 9729.475588 | 11320.0905  |             |
| 12196.73246 |             |             |             |             |             |
| RPL11       | RPL11       | 6218.818787 | 8433.620714 | 8262.59561  |             |
| 6960.454349 |             |             |             |             |             |
| FPGT        | FPGT        | 1189.596491 | 815.1913133 | 900.9685901 |             |
| 863.068878  |             |             |             |             |             |
| HS3ST3A1    | HS3ST3A1    |             | 30.20866747 | 70.42689532 |             |
| 25.64638313 | 33.34584301 |             |             |             |             |
| SCEL        | SCEL        | 0           | 0           | 2.942280266 |             |
| UQCR11      | UQCR11      | 9618.856394 | 10268.24134 | 8465.536555 |             |
| 8378.633437 |             |             |             |             |             |
| ADIRF       | ADIRF       | 0           | 1.760672383 | 15.61084191 | 6.865320621 |
| MRPL47      | MRPL47      | 5257.349818 | 4162.229513 | 3770.018321 |             |
| 3883.809951 |             |             |             |             |             |
| MIR4738     | MIR4738     | 6.250069132 | 0.880336191 | 4.460240545 | 0           |
| MIR4746     | MIR4746     | 0           | 2.641008574 | 0           | 1.961520177 |
| MIR3064     | MIR3064     | 870.8429658 | 768.5334951 | 1257.787834 |             |
| 1606.485025 |             |             |             |             |             |
| MIR4745     | MIR4745     | 5.208390943 | 5.282017149 | 12.2656615  |             |
| 3.923040355 |             |             |             |             |             |
| DIAPH3-AS1  | DIAPH3-AS1  |             | 241.6693398 | 247.3744698 |             |
| 140.4975772 | 190.2674572 |             |             |             |             |
| PRC1-AS1    | PRC1-AS1    |             | 1775.019634 | 1647.109014 |             |
| 967.8721983 | 1303.430158 |             |             |             |             |

|              |              |             |             |             |             |
|--------------|--------------|-------------|-------------|-------------|-------------|
| TM7SF2       | TM7SF2       | 863.5512184 | 1085.454524 | 706.9481264 |             |
| 1181.815907  |              |             |             |             |             |
| PKN2         | PKN2         | 1135.429226 | 1129.471334 | 1593.420935 |             |
| 1196.527308  |              |             |             |             |             |
| PPARGC1B     | PPARGC1B     |             | 328.1286294 | 293.1519517 |             |
| 282.1102145  |              | 357.9774324 |             |             |             |
| UBE2D1       | UBE2D1       | 2657.321059 | 2191.15678  | 2789.880461 |             |
| 2325.38217   |              |             |             |             |             |
| DNAH8        | DNAH8        | 6.250069132 | 9.683698106 | 2.230120273 |             |
| 36.28812328  |              |             |             |             |             |
| MASTL        | MASTL        | 3631.290166 | 3928.060086 | 2449.787119 |             |
| 3017.798793  |              |             |             |             |             |
| DPY19L3      | DPY19L3      | 379.1708607 | 489.4669224 | 421.4927315 |             |
| 462.9187619  |              |             |             |             |             |
| UBAC1        | UBAC1        | 1937.521431 | 1861.030709 | 1423.931794 |             |
| 1976.231579  |              |             |             |             |             |
| MAP7D3       | MAP7D3       | 1481.266384 | 1247.436383 | 1301.275179 |             |
| 1485.851534  |              |             |             |             |             |
| PLEKHF2      | PLEKHF2      | 1326.056334 | 1357.478407 | 2777.614799 |             |
| 1810.483124  |              |             |             |             |             |
| PRR5-ARHGAP8 | PRR5-ARHGAP8 |             | 189.5854303 | 222.7250564 |             |
| 489.5113998  |              | 305.0163876 |             |             |             |
| TRAPPC4      | TRAPPC4      | 6254.235845 | 4705.396943 | 5924.314504 |             |
| 5057.779777  |              |             |             |             |             |
| PAAF1        | PAAF1        | 2566.695057 | 2057.345679 | 1924.593795 |             |
| 2509.765067  |              |             |             |             |             |
| USP14        | USP14        | 13261.60502 | 10539.38488 | 9370.965385 |             |
| 10000.81062  |              |             |             |             |             |
| SYNPO        | SYNPO        | 0           | 2.641008574 | 0           | 4.903800443 |
| RBM19        | RBM19        | 3514.622209 | 2982.579017 | 4345.389351 |             |
| 4231.979783  |              |             |             |             |             |
| ZYX          | ZYX          | 8079.256032 | 10622.13649 | 4512.648371 |             |
| 7376.296627  |              |             |             |             |             |
| TRIM39       | TRIM39       | 90.62600242 | 29.05109432 | 224.1270874 |             |
| 59.82636541  |              |             |             |             |             |
| LOC285627    | LOC285627    |             | 2.083356377 | 0           | 0           |
| LINC00174    | LINC00174    |             | 36.4587366  | 97.71731725 | 0           |
| 86.97469063  |              | 85.32612771 |             |             |             |
| HPGD         | HPGD         | 4066.711649 | 5991.568119 | 1080.493272 |             |
| 1073.932297  |              |             |             |             |             |
| ZNF468       | ZNF468       | 2273.983486 | 1895.36382  | 3116.593081 |             |
| 2205.729439  |              |             |             |             |             |
| C17orf96     | C17orf96     |             | 147.9183028 | 354.7754851 |             |
| 127.1168555  |              | 196.1520177 |             |             |             |
| MIR6165      | MIR6165      | 0           | 0           | 1.115060136 | 0           |
| PINK1-AS     | PINK1-AS     |             | 3152.118199 | 2880.460018 |             |
| 3533.625572  |              | 3160.009006 |             |             |             |
| LSAMP-AS1    | LSAMP-AS1    |             | 0           | 0           | 0           |
| INSR         | INSR         | 18.7502074  | 121.4863944 | 115.9662542 | 0.980760089 |
| 240.2862217  |              |             |             |             |             |

|             |             |             |             |             |
|-------------|-------------|-------------|-------------|-------------|
| ZNF829      | ZNF829      | 277.0863982 | 373.2625452 | 569.7957296 |
| 555.1102102 |             |             |             |             |
| PSAP        | PSAP        | 23687.76201 | 19221.2604  | 24311.65615 |
| 20481.21293 |             |             |             |             |
| PSD4        | PSD4        | 2505.236044 | 7121.919789 | 2785.42022  |
| 3643.523729 |             |             |             |             |
| C11orf49    | C11orf49    |             | 1285.430885 | 1222.78697  |
| 982.36798   | 1438.77505  |             |             |             |
| C9orf16     | C9orf16     | 1516.683443 | 2080.23442  | 1057.077009 |
| 1474.082413 |             |             |             |             |
| VPS4A       | VPS4A       | 9810.525181 | 7344.644845 | 8163.355258 |
| 7992.213963 |             |             |             |             |
| C10orf95    | C10orf95    |             | 106.2511752 | 107.4010154 |
| 177.2945617 | 244.2092621 |             |             |             |
| PRPF18      | PRPF18      | 2371.901236 | 1874.235752 | 2252.421475 |
| 1831.079086 |             |             |             |             |
| RGS10       | RGS10       | 3576.081222 | 3806.573692 | 3270.47138  |
| 3590.562685 |             |             |             |             |
| OBSCN       | OBSCN       | 47.91719668 | 106.5206792 | 225.2421475 |
| 257.9399033 |             |             |             |             |
| TMC01       | TMC01       | 9751.149524 | 8127.263719 | 7775.31433  |
| 6992.819432 |             |             |             |             |
| CISH        | CISH        | 21699.19835 | 6928.245827 | 24019.5104  |
| 13186.31939 |             |             |             |             |
| SNX33       | SNX33       | 103.1261407 | 220.0840479 | 152.7632387 |
| 218.7094998 |             |             |             |             |
| TM4SF20     | TM4SF20     | 1.041678189 | 0           | 1.115060136 |
| IMP4        | IMP4        | 6868.825976 | 4193.921616 | 6478.499392 |
| 5934.579297 |             |             |             | 2.942280266 |
| HPCAL1      | HPCAL1      | 2235.441393 | 2964.091957 | 3066.415375 |
| 3984.82824  |             |             |             |             |
| PRELID2     | PRELID2     | 28.12531109 | 132.9307649 | 52.4078264  |
| 114.7489304 |             |             |             |             |
| TECR        | TECR        | 9118.850864 | 8879.070827 | 6844.239116 |
| 7858.83059  |             |             |             |             |
| GZF1        | GZF1        | 846.8843674 | 790.5418999 | 1206.495067 |
| 717.9163849 |             |             |             |             |
| PPARG       | PPARG       | 213.5440287 | 469.21919   | 225.2421475 |
| 248.1323024 |             |             |             |             |
| HCAR1       | HCAR1       | 13.54181645 | 14.96571525 | 14.49578177 |
| 12.74988115 |             |             |             |             |
| RSPH6A      | RSPH6A      | 0           | 1.760672383 | 0           |
| GPR63       | GPR63       | 222.9191324 | 163.7425316 | 138.2674569 |
| 90.22992816 |             |             |             |             |
| KIAA0040    | KIAA0040    |             | 10888.66211 | 7006.595748 |
| 10659.9749  | 5759.023241 |             |             |             |
| COL9A1      | COL9A1      | 0           | 0           | 0.980760089 |
| CHST10      | CHST10      | 447.9216211 | 581.0218863 | 421.4927315 |
| 588.4560532 |             |             |             |             |
| SAG         | SAG         | 3.125034566 | 3.521344766 | 0           |
|             |             |             |             | 4.903800443 |

|             |             |             |             |             |             |
|-------------|-------------|-------------|-------------|-------------|-------------|
| CCZ1        | CCZ1        | 2053.14771  | 1632.143299 | 1737.263692 |             |
| 1429.948209 |             |             |             |             |             |
| CCDC9       | CCDC9       | 945.8437953 | 1115.385955 | 979.0227996 |             |
| 1035.682654 |             |             |             |             |             |
| SARAF       | SARAF       | 27164.8838  | 26400.40205 | 65955.80706 |             |
| 40904.56102 |             |             |             |             |             |
| ACVR2A      | ACVR2A      | 108.3345316 | 154.9391697 | 250.8885307 |             |
| 292.2665064 |             |             |             |             |             |
| CCDC71L     | CCDC71L     | 194.7938213 | 478.9028881 | 307.7565976 |             |
| 396.2270758 |             |             |             |             |             |
| S100A1      | S100A1      | 10.41678189 | 24.64941336 | 17.84096218 |             |
| 31.38432284 |             |             |             |             |             |
| MRPS11      | MRPS11      | 4192.75471  | 3617.301411 | 3060.840074 |             |
| 2989.35675  |             |             |             |             |             |
| ADAM9       | ADAM9       | 1560.433927 | 1326.666641 | 690.2222243 |             |
| 793.4349117 |             |             |             |             |             |
| AAR2        | AAR2        | 4662.551573 | 3408.661733 | 4659.836309 |             |
| 4093.69261  |             |             |             |             |             |
| RADIL       | RADIL       | 2.083356377 | 2.641008574 | 1.115060136 | 0           |
| SACS        | SACS        | 1304.181092 | 1627.741618 | 1383.789629 |             |
| 1309.314718 |             |             |             |             |             |
| CNTN5       | CNTN5       | 0           | 0           | 0.980760089 |             |
| ZNF808      | ZNF808      | 806.2589181 | 513.2359996 | 853.0210042 |             |
| 919.9529632 |             |             |             |             |             |
| FGD3        | FGD3        | 8304.25852  | 6764.503295 | 8604.919072 |             |
| 7391.988788 |             |             |             |             |             |
| SLC39A14    | SLC39A14    |             | 5684.437876 | 4193.04128  |             |
| 4933.026043 | 4976.37669  |             |             |             |             |
| DTX2        | DTX2        | 1200.013273 | 1231.590332 | 1137.361339 |             |
| 1026.855813 |             |             |             |             |             |
| LOC344887   | LOC344887   |             | 43.75048393 | 16.72638764 |             |
| 392.501168  | 21.57672195 |             |             |             |             |
| SNED1       | SNED1       | 141.6682337 | 345.091787  | 269.844553  |             |
| 241.2669818 |             |             |             |             |             |
| LRIG3       | LRIG3       | 27.08363291 | 53.70050768 | 81.39938995 |             |
| 1.961520177 |             |             |             |             |             |
| NPIPA3      | NPIPA3      | 0           | 3.521344766 | 2.230120273 | 1.961520177 |
| FANCC       | FANCC       | 1266.680677 | 1162.043773 | 821.7993204 |             |
| 973.894768  |             |             |             |             |             |
| FAM212B     | FAM212B     | 97.91774974 | 75.70891246 | 95.89517172 |             |
| 120.6334909 |             |             |             |             |             |
| FBN1        | FBN1        | 22.91692015 | 57.22185244 | 16.72590204 |             |
| 36.28812328 |             |             |             |             |             |
| ZNF683      | ZNF683      | 3.125034566 | 7.042689532 | 12.2656615  | 0           |
| TNNI2       | TNNI2       | 0           | 3.521344766 | 0           | 2.942280266 |
| CHM         | CHM         | 1303.139414 | 1241.27403  | 1175.273384 |             |
| 1117.085741 |             |             |             |             |             |
| IL6         | IL6         | 0           | 0.880336191 | 54.63794668 | 23.53824213 |
| PKD2L2      | PKD2L2      | 79.16754234 | 124.127403  | 183.9849225 |             |
| 103.9605694 |             |             |             |             |             |

|             |             |             |             |
|-------------|-------------|-------------|-------------|
| RNF144A-AS1 | RNF144A-AS1 | 53.12558762 | 61.6235334  |
| 303.2963571 | 185.3636568 |             |             |
| MIR302A     | MIR302A     | 2.083356377 | 1.760672383 |
| 0.980760089 |             |             | 5.575300681 |
| MIR30C1     | MIR30C1     | 1.041678189 | 2.641008574 |
| 1.961520177 |             |             | 10.03554123 |
| MIR29C      | MIR29C      | 1.041678189 | 2.641008574 |
| 3.923040355 |             |             | 8.92048109  |
| MIR106B     | MIR106B     | 8.33342551  | 18.48706002 |
| 25.49976231 |             |             | 24.531323   |
| KLC3        | KLC3        | 19.79188559 | 27.29042193 |
| 23.53824213 |             |             | 4.460240545 |
| ZNF815P     | ZNF815P     | 198.960534  | 286.9895984 |
| 301.0933472 |             |             | 275.4198537 |
| PAIP2       | PAIP2       | 11327.20862 | 10793.80204 |
| 11920.15812 |             |             | 11859.77961 |
| PMM1        | PMM1        | 1428.140797 | 1714.014565 |
| 1709.464835 |             |             | 1058.192069 |
| FBX04       | FBX04       | 1120.845731 | 1243.034702 |
| 1464.274812 |             |             | 1178.618564 |
| ARL8B       | ARL8B       | 6374.028837 | 4961.574775 |
| 5305.91208  |             |             | 6843.124056 |
| PLCD1       | PLCD1       | 580.2147511 | 728.9183665 |
| 859.1458377 |             |             | 916.579432  |
| PTPRR       | PTPRR       | 0           | 0           |
| MOB3A       | MOB3A       | 9476.146483 | 8800.720906 |
| 8891.570964 |             |             | 1.961520177 |
| BCDIN3D     | BCDIN3D     | 590.631533  | 595.9876016 |
| 678.6859814 |             |             | 7354.936659 |
| C17orf64    | C17orf64    | 8.33342551  | 0           |
| 3.923040355 |             |             | 0           |
| DNAJC24     | DNAJC24     | 863.5512184 | 1012.38662  |
| 923.8760035 |             |             | 903.1987104 |
| HIF3A       | HIF3A       | 1.041678189 | 0           |
| BZW2        | BZW2        | 6720.907673 | 5159.650418 |
| 6320.018011 |             |             | 6399.330122 |
| EIF5A       | EIF5A       | 34568.09069 | 12935.66    |
| 10852.11038 |             |             | 30180.21765 |
| SGK1        | SGK1        | 4396.923634 | 3660.437884 |
| 2385.208536 |             |             | 1803.05224  |
| ZNF530      | ZNF530      | 467.7135067 | 464.8175091 |
| 410.9384772 |             |             | 577.6011506 |
| XRCC4       | XRCC4       | 1141.679295 | 1162.924109 |
| 948.3950057 |             |             | 921.0396726 |
| MRPS25      | MRPS25      | 3450.038161 | 3079.415998 |
| 3337.526582 |             |             | 2650.497944 |
| POLR1E      | POLR1E      | 1713.56062  | 1215.74428  |
| 1931.116615 |             |             | 2045.02029  |
| PI4KB       | PI4KB       | 7713.626987 | 6262.711666 |
| 6227.826563 |             |             | 7573.488446 |

|             |           |             |             |             |
|-------------|-----------|-------------|-------------|-------------|
| CUL2        | CUL2      | 7033.41113  | 5371.81144  | 5683.461515 |
| 5555.025142 |           |             |             |             |
| EGR4        | EGR4      | 58.33397857 | 61.6235334  | 56.86806695 |
| 143.1909729 |           |             |             |             |
| SNORA21     | SNORA21   | 6.250069132 | 17.60672383 | 10.03554123 |
| 21.57672195 |           |             |             |             |
| SNORA27     | SNORA27   | 46.87551849 | 47.53815434 | 52.4078264  |
| 58.84560532 |           |             |             |             |
| C4orf27     | C4orf27   | 1166.679571 | 1160.2831   | 870.8619664 |
| 1247.526833 |           |             |             |             |
| ZNF664      | ZNF664    | 320.8368821 | 836.3193819 | 630.008977  |
| 512.9375264 |           |             |             |             |
| HYI         | HYI       | 58.33397857 | 176.0672383 | 181.7548022 |
| 105.9220896 |           |             |             |             |
| EPX         | EPX       | 1.041678189 | 6.16235334  | 2.230120273 |
| 0.980760089 |           |             |             |             |
| TNFAIP2     | TNFAIP2   | 46.87551849 | 47.53815434 | 90.31987104 |
| 59.82636541 |           |             |             |             |
| CENPE       | CENPE     | 4079.211787 | 4656.098117 | 1441.772756 |
| 2553.899271 |           |             |             |             |
| MYL4        | MYL4      | 7.291747321 | 0           | 2.230120273 |
| CCNG1       | CCNG1     | 9650.10674  | 6607.803453 | 8236.949227 |
| 5300.027519 |           |             |             | 1.961520177 |
| GFPT2       | GFPT2     | 3.125034566 | 40.49546481 | 0           |
| 36.28812328 |           |             |             |             |
| SENP3       | SENP3     | 672.9241099 | 1640.946661 | 977.9077395 |
| 1009.202131 |           |             |             |             |
| ENOX1-AS2   | ENOX1-AS2 |             | 0           | 0           |
| 0.980760089 |           |             |             | 2.230120273 |
| BMP2        | BMP2      | 1.041678189 | 0           | 0           |
| BCAT2       | BCAT2     | 2785.447477 | 2481.667724 | 2198.898589 |
| 2615.687156 |           |             |             |             |
| BAK1        | BAK1      | 13743.90202 | 12800.08822 | 6351.382536 |
| 7883.349593 |           |             |             |             |
| SUPT4H1     | SUPT4H1   | 5081.306204 | 6513.60748  | 4840.476052 |
| 5226.470513 |           |             |             |             |
| ALDH7A1     | ALDH7A1   | 19.79188559 | 138.2127821 | 56.86806695 |
| 155.9408541 |           |             |             |             |
| CUL5        | CUL5      | 2776.072373 | 2535.368231 | 2968.290083 |
| 2679.436562 |           |             |             |             |
| PKP2        | PKP2      | 1.041678189 | 0           | 24.531323   |
| 11.76912106 |           |             |             |             |
| STRN        | STRN      | 2251.066566 | 2890.143716 | 2268.032317 |
| 2343.035852 |           |             |             |             |
| ACY1        | ACY1      | 1389.598704 | 1164.684781 | 1255.557713 |
| 2014.481222 |           |             |             |             |
| LYST        | LYST      | 3086.492473 | 4185.118254 | 4657.606189 |
| 5025.414694 |           |             |             |             |
| CHRNE       | CHRNE     | 41.66712755 | 72.1875677  | 95.89517172 |
| 77.480047   |           |             |             |             |
| CHRNA1      | CHRNA1    | 1.041678189 | 0.880336191 | 0           |
| 4.903800443 |           |             |             |             |
| RAB11B      | RAB11B    | 2009.397226 | 2977.296999 | 2115.269078 |



|             |         |             |             |             |
|-------------|---------|-------------|-------------|-------------|
| 2130.210913 |         |             |             |             |
| ELOVL7      | ELOVL7  | 25.00027653 | 11.44437049 | 6.690360818 |
| 12.74988115 |         |             |             |             |
| MEM01       | MEM01   | 3461.496621 | 2456.137974 | 3145.584644 |
| 2687.282643 |         |             |             |             |
| PTRH1       | PTRH1   | 744.7999049 | 635.6027302 | 773.8517346 |
| 811.0885933 |         |             |             |             |
| RGS19       | RGS19   | 3869.834471 | 3829.462433 | 1446.232997 |
| 1764.3874   |         |             |             |             |
| ELM01       | ELM01   | 10930.32923 | 11296.47401 | 9403.302129 |
| 10386.24934 |         |             |             |             |
| HECTD4      | HECTD4  | 679.174179  | 1292.333529 | 1131.786038 |
| 866.0111583 |         |             |             |             |
| FAM222B     | FAM222B | 1923.979615 | 1618.05792  | 1358.143246 |
| 1701.618754 |         |             |             |             |
| NHP2L1      | NHP2L1  | 12837.642   | 10999.80071 | 13107.5319  |
| 12383.07688 |         |             |             |             |
| USP33       | USP33   | 5685.479554 | 5044.326377 | 6158.477133 |
| 5746.27336  |         |             |             |             |
| MYCN        | MYCN    | 1.041678189 | 2.641008574 | 25.64638313 |
| 2.942280266 |         |             |             |             |
| WAC         | WAC     | 9254.269028 | 8025.144721 | 8626.105214 |
| 6894.743423 |         |             |             |             |
| HIC2        | HIC2    | 56.25062219 | 158.4605145 | 136.0373366 |
| 156.9216142 |         |             |             |             |
| DSE         | DSE     | 904.1766678 | 240.3317803 | 1157.432421 |
| 678.6859814 |         |             |             |             |
| TBX21       | TBX21   | 2223.982933 | 4671.063832 | 2746.393116 |
| 5116.625383 |         |             |             |             |
| KCNJ14      | KCNJ14  | 17.70852921 | 28.17075813 | 49.062646   |
| 43.1534439  |         |             |             |             |
| RPA4        | RPA4    | 16.66685102 | 3.521344766 | 16.72590204 |
| 6.865320621 |         |             |             |             |
| RBM34       | RBM34   | 3533.372416 | 2386.591415 | 3301.693063 |
| 3051.144636 |         |             |             |             |
| SETX        | SETX    | 8091.75617  | 9470.656747 | 10652.16948 |
| 9006.319894 |         |             |             |             |
| SEC23A      | SEC23A  | 7119.87042  | 6299.685786 | 6103.839186 |
| 6076.789509 |         |             |             |             |
| ATP5H       | ATP5H   | 4791.719668 | 5529.391618 | 4417.86826  |
| 4618.399258 |         |             |             |             |
| TP53RK      | TP53RK  | 2664.612807 | 2226.370228 | 2901.386475 |
| 2301.843928 |         |             |             |             |
| USP38       | USP38   | 4339.631334 | 4414.005664 | 4393.336937 |
| 3716.099976 |         |             |             |             |
| RNF181      | RNF181  | 3320.870066 | 4014.333033 | 3127.743682 |
| 3297.315418 |         |             |             |             |
| HELB        | HELB    | 1528.141903 | 2751.930934 | 2477.663623 |
| 2891.280741 |         |             |             |             |
| RNF114      | RNF114  | 8121.964837 | 6185.242081 | 8913.790729 |

|             |          |             |             |             |
|-------------|----------|-------------|-------------|-------------|
| 7056.568838 |          |             |             |             |
| FKBP2       | FKBP2    | 2085.439734 | 2030.055257 | 1924.593795 |
| 1946.808776 |          |             |             |             |
| SLC01B1     | SLC01B1  | 0           | 0           | 0.980760089 |
| TTYH1       | TTYH1    | 3.125034566 | 3.521344766 | 1.115060136 |
| 4.903800443 |          |             |             |             |
| GSTCD       | GSTCD    | 923.9685534 | 860.9687952 | 546.3794668 |
| 602.1866944 |          |             |             |             |
| SDK2        | SDK2     | 0           | 6.16235334  | 13.38072164 |
| 34.3266031  |          |             |             |             |
| STXBP3      | STXBP3   | 4340.673012 | 3973.837568 | 4986.548929 |
| 4341.824913 |          |             |             |             |
| PPP4C       | PPP4C    | 15535.58851 | 12961.18975 | 9795.803297 |
| 10910.95599 |          |             |             |             |
| PPP2CA      | PPP2CA   | 28286.77121 | 20725.75496 | 22673.63281 |
| 21153.03359 |          |             |             |             |
| PATL2       | PATL2    | 341.6704459 | 433.1254062 | 991.2884611 |
| 672.8014208 |          |             |             |             |
| C9orf47     | C9orf47  | 4.166712755 | 3.521344766 | 0           |
| 1.961520177 |          |             |             |             |
| TSSC4       | TSSC4    | 3727.124559 | 2515.120499 | 3600.52918  |
| 2899.126822 |          |             |             |             |
| B4GALNT4    | B4GALNT4 | 0           | 1.760672383 | 0           |
| 21.57672195 |          |             |             |             |
| ZNF688      | ZNF688   | 937.5103698 | 910.2676219 | 815.1089596 |
| 815.0116337 |          |             |             |             |
| C17orf50    | C17orf50 | 0           | 1.760672383 | 2.230120273 |
| 0           |          |             |             |             |
| PEX1        | PEX1     | 1186.471457 | 1436.708664 | 1503.101064 |
| 1768.31044  |          |             |             |             |
| PORCN       | PORCN    | 688.5492827 | 465.6978453 | 346.7837024 |
| 495.2838448 |          |             |             |             |
| LRRC8C      | LRRC8C   | 8039.67226  | 11321.12342 | 6535.367459 |
| 7591.083086 |          |             |             |             |
| C2orf16     | C2orf16  | 25.00027653 | 14.96571525 | 56.86806695 |
| 22.55748204 |          |             |             |             |
| UBQLN1      | UBQLN1   | 11912.63177 | 8038.349764 | 9803.608718 |
| 8814.090917 |          |             |             |             |
| PDGFD       | PDGFD    | 14.58349464 | 0           | 1.115060136 |
| 6.865320621 |          |             |             |             |
| MRPL43      | MRPL43   | 2906.282146 | 2848.767915 | 2821.102145 |
| 2609.802596 |          |             |             |             |
| CCDC28B     | CCDC28B  | 818.7590563 | 560.7741539 | 384.695747  |
| 464.880282  |          |             |             |             |
| DAB2IP      | DAB2IP   | 2.083356377 | 0           | 0           |
| 0.980760089 |          |             |             |             |
| SLC35F5     | SLC35F5  | 1506.266661 | 1329.307649 | 1471.87938  |
| 1189.661988 |          |             |             |             |
| CXXC4       | CXXC4    | 0           | 2.641008574 | 4.460240545 |
| 1.961520177 |          |             |             |             |
| PGLYRP3     | PGLYRP3  | 14.58349464 | 9.683698106 | 2.230120273 |
| 1.961520177 |          |             |             |             |
| RPL9        | RPL9     | 12158.46782 | 11478.7036  | 16120.42439 |
| 12806.76524 |          |             |             |             |
| IARS        | IARS     | 29349.28297 | 22584.14466 | 26411.31439 |

|              |              |             |             |             |
|--------------|--------------|-------------|-------------|-------------|
| 26427.56135  |              |             |             |             |
| ATP8A1       | ATP8A1       | 526.0474853 | 1688.484815 | 756.0107724 |
| 1562.350821  |              |             |             |             |
| NBR1         | NBR1         | 8528.219331 | 8622.892995 | 11738.23805 |
| 9233.856235  |              |             |             |             |
| RPS15AP10    | RPS15AP10    |             | 12.50013826 | 26.41008574 |
| 35.68192436  |              | 15.69216142 |             |             |
| LINC00263    | LINC00263    |             | 17.70852921 | 139.9734544 |
| 79.16926967  |              | 107.8836098 |             |             |
| OIP5-AS1     | OIP5-AS1     |             | 5219.849404 | 5667.6044   |
| 3478.987625  |              | 4399.689758 |             |             |
| CYP4F35P     | CYP4F35P     |             | 14.58349464 | 19.36739621 |
| 23.41626286  |              | 10.78836098 |             |             |
| ZNRD1-AS1    | ZNRD1-AS1    |             | 9.375103698 | 32.57243908 |
| 4.460240545  |              | 44.13420399 |             |             |
| KIAA1841     | KIAA1841     |             | 520.8390943 | 640.0044112 |
| 255.3487712  |              | 293.2472665 |             |             |
| SC02         | SC02         | 4516.716626 | 3652.514858 | 3677.468329 |
| 4395.766717  |              |             |             |             |
| ZNF680       | ZNF680       | 563.5479001 | 486.8259139 | 964.5270179 |
| 689.4743423  |              |             |             |             |
| TRIM3        | TRIM3        | 38.54209298 | 110.9223601 | 186.2150428 |
| 189.2866971  |              |             |             |             |
| SET          | SET          | 15663.71492 | 21050.59901 | 17388.24776 |
| 14684.92081  |              |             |             |             |
| LARGE        | LARGE        | 0           | 3.521344766 | 1.115060136 |
|              |              |             |             | 17.6536816  |
| RHOV         | RHOV         | 14.58349464 | 11.44437049 | 16.72590204 |
| 17.6536816   |              |             |             |             |
| NOP14        | NOP14        | 6452.154701 | 5019.676964 | 6596.695766 |
| 6805.494255  |              |             |             |             |
| ADCY10       | ADCY10       | 2.083356377 | 0           | 7.805420954 |
|              |              |             |             | 1.961520177 |
| LOC101927839 | LOC101927839 |             | 0           | 1.760672383 |
|              |              |             |             | 2.230120273 |
|              |              | 2.942280266 |             |             |
| CNTFR        | CNTFR        | 0           | 0           | 2.942280266 |
| WAS          | WAS          | 623.965235  | 2037.978283 | 498.4318809 |
| 594.3406137  |              |             |             |             |
| IQSEC3       | IQSEC3       | 2.083356377 | 0           | 72.47890886 |
|              |              |             |             | 0.980760089 |
| CYP51A1      | CYP51A1      | 2853.156559 | 3829.462433 | 4285.176104 |
| 4979.31897   |              |             |             |             |
| AVPR2        | AVPR2        | 0           | 4.401680957 | 0           |
|              |              |             |             | 0           |
| NEFM         | NEFM         | 3.125034566 | 1.760672383 | 24.531323   |
| 35.30736319  |              |             |             |             |
| ZNF595       | ZNF595       | 359.3789751 | 293.1519517 | 657.8854804 |
| 504.1106856  |              |             |             |             |
| RAD21-AS1    | RAD21-AS1    |             | 164.5851538 | 269.3828746 |
| 128.2319157  |              | 131.4218519 |             |             |
| GTPBP3       | GTPBP3       | 997.9277048 | 1619.818592 | 997.978822  |
| 1895.809251  |              |             |             |             |
| CCNG2        | CCNG2        | 688.5492827 | 1440.230009 | 1106.139655 |
| 1001.356051  |              |             |             |             |

|              |              |             |             |             |
|--------------|--------------|-------------|-------------|-------------|
| RRP1         | RRP1         | 5015.680479 | 3415.704423 | 4587.357401 |
| 4987.165051  |              |             |             |             |
| PCDHGA11     | PCDHGA11     |             | 5.208390943 | 4.401680957 |
| 52.4078264   | 11.76912106  |             |             |             |
| TFAP4        | TFAP4        | 21.87524196 | 94.19597248 | 20.07108245 |
| 37.26888337  |              |             |             |             |
| C16orf89     | C16orf89     |             | 1.041678189 | 0.880336191 |
| 2.230120273  | 0            |             |             |             |
| SCCPDH       | SCCPDH       | 1740.644253 | 2384.830743 | 1285.664337 |
| 2742.205208  |              |             |             |             |
| NUDT13       | NUDT13       | 106.2511752 | 89.79429153 | 119.3114346 |
| 77.480047    |              |             |             |             |
| LOC101927164 | LOC101927164 |             | 243.7526962 | 165.503204  |
| 117.0813143  | 182.4213765  |             |             |             |
| BAG4         | BAG4         | 2438.56864  | 2523.923861 | 2075.126914 |
| 1916.405213  |              |             |             |             |
| HSD17B7      | HSD17B7      | 1460.432821 | 929.6350182 | 1501.986004 |
| 1133.758663  |              |             |             |             |
| THEMIS       | THEMIS       | 4460.466004 | 4653.457108 | 4280.715863 |
| 2948.164827  |              |             |             |             |
| LOC100507053 | LOC100507053 |             | 26.04195472 | 41.375801   |
| 32.33674395  | 26.48052239  |             |             |             |
| LOC257396    | LOC257396    |             | 132.29313   | 113.5633687 |
| 153.8782988  | 170.6522554  |             |             |             |
| LOC100630923 | LOC100630923 |             | 1633.3514   | 1407.65757  |
| 1808.627541  | 1736.926117  |             |             |             |
| LINC00880    | LINC00880    |             | 138.5431991 | 298.4339689 |
| 43.48734531  | 200.0750581  |             |             |             |
| LOC642236    | LOC642236    |             | 23.95859834 | 22.88874098 |
| 6.690360818  | 21.57672195  |             |             |             |
| LOC648987    | LOC648987    |             | 238.5443052 | 246.4941336 |
| 730.3643893  | 363.8619929  |             |             |             |
| SPG200S      | SPG200S      | 16.66685102 | 25.52974955 | 40.14216491 |
| 23.53824213  |              |             |             |             |
| LOC100507501 | LOC100507501 |             | 61.45901313 | 79.23025723 |
| 154.9933589  | 137.3064124  |             |             |             |
| MCF2L-AS1    | MCF2L-AS1    |             | 4.166712755 | 6.16235334  |
| 35.68192436  | 61.78788559  |             |             |             |
| GOLGA8T      | GOLGA8T      | 0           | 0.880336191 | 0           |
|              |              |             |             | 0.980760089 |
| LINC00996    | LINC00996    |             | 29.16698928 | 52.82017149 |
| 13.38072164  | 51.9802847   |             |             |             |
| ASAP1-IT2    | ASAP1-IT2    |             | 2.083356377 | 4.401680957 |
| 12.2656615   | 7.846080709  |             |             |             |
| SENP1        | SENP1        | 4063.586614 | 4172.793547 | 2754.198537 |
| 3610.177886  |              |             |             |             |
| GATAD1       | GATAD1       | 433.3381265 | 689.3032379 | 834.0649819 |
| 719.8779051  |              |             |             |             |
| OR2M5        | OR2M5        | 0           | 0           | 0.980760089 |
| ST8SIA6-AS1  | ST8SIA6-AS1  |             | 7.291747321 | 2.641008574 |
| 12.2656615   | 1.961520177  |             |             |             |

|                 |               |             |               |               |
|-----------------|---------------|-------------|---------------|---------------|
| LINC00944       | LINC00944     | 36.4587366  | 22.00840479   |               |
| 178.4096218     | 211.8441792   |             |               |               |
| PRRC1 PRRC1     | 4127.128984   | 3892.846639 | 4375.495975   |               |
| 4098.596411     |               |             |               |               |
| MIR1292 MIR1292 | 735.4248012   | 551.970792  | 737.0547501   |               |
| 681.6282616     |               |             |               |               |
| SMAD9 SMAD9     | 22.91692015   | 50.17916291 | 5.575300681   |               |
| 23.53824213     |               |             |               |               |
| TMEM179B        | TMEM179B      | 4599.009203 | 3664.839565   |               |
| 4592.932701     | 3728.849857   |             |               |               |
| PIP5K1C PIP5K1C | 700.0077428   | 1272.085797 | 1063.76737    |               |
| 916.0299228     |               |             |               |               |
| AP5S1 AP5S1     | 1488.558132   | 1280.008822 | 781.6571555   |               |
| 990.5676896     |               |             |               |               |
| TEX29 TEX29     | 19.79188559   | 14.96571525 | 4.460240545   |               |
| 7.846080709     |               |             |               |               |
| C12orf54        | C12orf54      | 0           | 1.760672383   | 0             |
| 5.884560532     |               |             |               |               |
| ZNF746 ZNF746   | 1460.432821   | 1599.57086  | 1506.446244   |               |
| 1760.464359     |               |             |               |               |
| C7orf60 C7orf60 | 487.5053923   | 530.8427234 | 807.3035387   |               |
| 663.97458       |               |             |               |               |
| C6orf195        | C6orf195      | 0           | 0             | 0 0.980760089 |
| DYNLRB2 DYNLRB2 | 2.083356377   | 17.60672383 | 18.95602232   |               |
| 17.6536816      |               |             |               |               |
| FRMD5 FRMD5     | 243.7526962   | 353.895149  | 149.4180583   |               |
| 136.3256523     |               |             |               |               |
| NTN5 NTN5       | 1.041678189   | 7.042689532 | 14.49578177   |               |
| 8.826840798     |               |             |               |               |
| ZNF446 ZNF446   | 237.502627    | 316.9210289 | 223.0120273   |               |
| 381.5156745     |               |             |               |               |
| RNASEH2C        | RNASEH2C      | 4738.59408  | 4395.518604   |               |
| 4746.811        | 4829.262677   |             |               |               |
| PLA2G12A        | PLA2G12A      | 964.5940027 | 710.4313065   |               |
| 877.5523272     | 938.5874049   |             |               |               |
| ZFYVE9 ZFYVE9   | 32.29202385   | 33.45277527 | 223.0120273   |               |
| 236.3631814     |               |             |               |               |
| PFN2 PFN2       | 14.58349464   | 65.14487817 | 118.1963744   |               |
| 76.49928692     |               |             |               |               |
| CHD5 CHD5       | 17.70852921   | 4.401680957 | 8.92048109    | 0             |
| TSHB TSHB       | 0 0.880336191 | 0           | 0             |               |
| TYRP1 TYRP1     | 0 0           | 1.115060136 | 0             |               |
| DNAH1 DNAH1     | 123.9597045   | 291.3912794 | 154.9933589   |               |
| 152.0178137     |               |             |               |               |
| PPP1R10 PPP1R10 | 1.041678189   | 1.760672383 | 0 0           |               |
| TAL2 TAL2       | 5.208390943   | 3.521344766 | 6.690360818   |               |
| 4.903800443     |               |             |               |               |
| PITX1 PITX1     | 12.50013826   | 29.93143051 | 0 5.884560532 |               |
| TFCP2 TFCP2     | 1268.764034   | 1751.869021 | 1548.818529   |               |
| 1450.544171     |               |             |               |               |

|              |              |             |             |             |             |
|--------------|--------------|-------------|-------------|-------------|-------------|
| NPAS1        | NPAS1        | 10.41678189 | 16.72638764 | 7.805420954 |             |
| 13.73064124  |              |             |             |             |             |
| RPL5         | RPL5         | 28777.40164 | 27258.72983 | 31129.13382 |             |
| 30764.48246  |              |             |             |             |             |
| GJA4         | GJA4         | 0           | 0           | 6.865320621 |             |
| ST8SIA1      | ST8SIA1      | 60.41733494 | 41.375801   | 105.9307129 |             |
| 93.17220842  |              |             |             |             |             |
| CYC1         | CYC1         | 20246.05728 | 13055.38572 | 12043.76453 |             |
| 12535.09469  |              |             |             |             |             |
| FOX01        | FOX01        | 4874.012245 | 3443.875181 | 6331.311454 |             |
| 5588.370985  |              |             |             |             |             |
| SF3B4        | SF3B4        | 8688.637772 | 7479.336282 | 6923.408386 |             |
| 6458.305184  |              |             |             |             |             |
| CYP2E1       | CYP2E1       | 0           | 0.880336191 | 8.92048109  | 9.807600887 |
| HDAC3        | HDAC3        | 9723.024213 | 6875.425655 | 6604.501187 |             |
| 7900.022514  |              |             |             |             |             |
| PCDHGB4      | PCDHGB4      | 7.291747321 | 7.042689532 | 41.25722504 |             |
| 11.76912106  |              |             |             |             |             |
| PCDHGA12     | PCDHGA12     |             | 9.375103698 | 4.401680957 |             |
| 33.45180409  | 18.63444168  |             |             |             |             |
| EFNB1        | EFNB1        | 441.671552  | 463.9371729 | 539.689106  |             |
| 443.3035601  |              |             |             |             |             |
| PHC1         | PHC1         | 3216.702247 | 2256.301659 | 4178.130331 |             |
| 3641.562209  |              |             |             |             |             |
| ATP5E        | ATP5E        | 12226.1769  | 16294.14257 | 12060.49043 |             |
| 11225.77997  |              |             |             |             |             |
| GLTSCR1L     | GLTSCR1L     |             | 391.670999  | 972.7714915 |             |
| 621.0884959  | 463.8995219  |             |             |             |             |
| TMEM131      | TMEM131      | 1796.894876 | 3066.210955 | 1906.752833 |             |
| 2130.210913  |              |             |             |             |             |
| ADSS         | ADSS         | 4217.754986 | 3867.316889 | 4155.829128 |             |
| 4115.269332  |              |             |             |             |             |
| CCZ1B        | CCZ1B        | 1617.726227 | 1090.736541 | 1266.708315 |             |
| 1015.086692  |              |             |             |             |             |
| CCT5         | CCT5         | 43674.44142 | 29595.14208 | 32960.06257 |             |
| 34306.9879   |              |             |             |             |             |
| PADI3        | PADI3        | 0           | 1.115060136 | 0           |             |
| LOC101928035 | LOC101928035 |             | 0           | 3.345180409 | 0           |
| LOC101928248 | LOC101928248 |             | 9.375103698 | 4.401680957 | 0           |
|              | 5.884560532  |             |             |             |             |
| MAST2        | MAST2        | 2309.400544 | 2990.502042 | 1795.246819 |             |
| 2156.691435  |              |             |             |             |             |
| PUS1         | PUS1         | 1627.101331 | 1352.19639  | 1273.398676 |             |
| 1266.161274  |              |             |             |             |             |
| TRPS1        | TRPS1        | 288.5448583 | 1181.411169 | 346.7837024 |             |
| 533.5334882  |              |             |             |             |             |
| CCDC51       | CCDC51       | 2790.655868 | 1782.680788 | 2464.282901 |             |
| 2231.229202  |              |             |             |             |             |
| GRK1         | GRK1         | 1.041678189 | 0           | 0           |             |
| LOC730183    | LOC730183    |             | 66.66740408 | 71.30723151 |             |

|                 |             |             |             |             |  |
|-----------------|-------------|-------------|-------------|-------------|--|
| 55.75300681     | 61.78788559 |             |             |             |  |
| SLC35G6 SLC35G6 | 1.041678189 | 4.401680957 | 0           | 6.865320621 |  |
| GRAMD3 GRAMD3   | 1135.429226 | 1162.043773 | 909.8890712 |             |  |
| 933.6836044     |             |             |             |             |  |
| RAD23B RAD23B   | 540.6309799 | 1374.204795 | 663.4607811 |             |  |
| 661.0322998     |             |             |             |             |  |
| TAF13 TAF13     | 66.66740408 | 111.8026963 | 61.32830749 |             |  |
| 58.84560532     |             |             |             |             |  |
| TAF12 TAF12     | 3505.247105 | 2710.555133 | 2788.765401 |             |  |
| 2412.669818     |             |             |             |             |  |
| THG1L THG1L     | 841.6759765 | 563.4151625 | 888.7029286 |             |  |
| 788.5311113     |             |             |             |             |  |
| ANKRD10 ANKRD10 | 4075.045074 | 5849.833992 | 2882.430452 |             |  |
| 3403.237508     |             |             |             |             |  |
| GABARAPL2       | GABARAPL2   | 5611.520403 | 6882.468345 |             |  |
| 6074.847622     | 5585.428705 |             |             |             |  |
| MRPL27 MRPL27   | 6443.821275 | 4664.021142 | 3594.953879 |             |  |
| 3388.526106     |             |             |             |             |  |
| VAMP2 VAMP2     | 1233.346975 | 1595.169179 | 3059.725014 |             |  |
| 2062.538466     |             |             |             |             |  |
| NXF1 NXF1       | 6986.535612 | 5493.297835 | 7895.740825 |             |  |
| 7851.96527      |             |             |             |             |  |
| MRPS2 MRPS2     | 4836.51183  | 3257.243908 | 3415.429197 |             |  |
| 3415.006629     |             |             |             |             |  |
| SMG6 SMG6       | 1943.7715   | 1987.79912  | 2357.237128 |             |  |
| 1919.347494     |             |             |             |             |  |
| THOC1 THOC1     | 3685.457432 | 3006.348094 | 3171.231028 |             |  |
| 3707.273135     |             |             |             |             |  |
| SPTBN1 SPTBN1   | 7058.411407 | 23718.01767 | 4490.347169 |             |  |
| 6114.058393     |             |             |             |             |  |
| ADH4 ADH4       | 0 0         | 1.115060136 | 0           |             |  |
| VSIG1 VSIG1     | 20.83356377 | 36.09378385 | 157.2234792 |             |  |
| 77.480047       |             |             |             |             |  |
| ARL9 ARL9       | 5.208390943 | 9.683698106 | 13.38072164 |             |  |
| 16.67292151     |             |             |             |             |  |
| CRIP3 CRIP3     | 2.083356377 | 10.5640343  | 3.345180409 |             |  |
| 28.44204257     |             |             |             |             |  |
| PBLD PBLD       | 82.29257691 | 79.23025723 | 91.43493117 |             |  |
| 81.40308736     |             |             |             |             |  |
| NKIRAS2 NKIRAS2 | 2558.361631 | 1628.621954 | 2200.013649 |             |  |
| 1958.577897     |             |             |             |             |  |
| ATAD3C ATAD3C   | 16.66685102 | 17.60672383 | 12.2656615  |             |  |
| 22.55748204     |             |             |             |             |  |
| AMIG02 AMIG02   | 556.2561528 | 1013.266956 | 1243.292052 |             |  |
| 1851.675047     |             |             |             |             |  |
| MIR4435-1       | MIR4435-1   | 8.33342551  | 6.16235334  | 0           |  |
| 0.980760089     |             |             |             |             |  |
| MIR4434 MIR4434 | 13.54181645 | 7.042689532 | 22.30120273 |             |  |
| 8.826840798     |             |             |             |             |  |
| MIR4427 MIR4427 | 1.041678189 | 0 0         | 0           |             |  |

|             |             |             |             |             |             |
|-------------|-------------|-------------|-------------|-------------|-------------|
| MIR548AC    | MIR548AC    | 0           | 0.880336191 | 0           | 0           |
| MIR4420     | MIR4420     | 1.041678189 | 1.760672383 | 4.460240545 |             |
| 2.942280266 |             |             |             |             |             |
| MIR54802    | MIR54802    | 0           | 0           | 8.92048109  |             |
| 2.942280266 |             |             |             |             |             |
| AFF1        | AFF1        | 758.3417214 | 2016.850215 | 1360.373366 |             |
| 1044.509494 |             |             |             |             |             |
| UPP2        | UPP2        | 0           | 0           | 1.115060136 | 0.980760089 |
| SIK1        | SIK1        | 47.91719668 | 38.73479242 | 97.01023186 |             |
| 73.55700665 |             |             |             |             |             |
| FAM149B1    | FAM149B1    |             | 269.7946509 | 419.0400271 |             |
| 311.101778  | 397.2078359 |             |             |             |             |
| FGFR3       | FGFR3       | 9.375103698 | 8.803361914 | 21.18614259 |             |
| 0.980760089 |             |             |             |             |             |
| COX11       | COX11       | 4301.089241 | 2977.296999 | 2979.440684 |             |
| 2741.224448 |             |             |             |             |             |
| CALR        | CALR        | 15043.9164  | 18489.70103 | 12827.65181 |             |
| 10843.28354 |             |             |             |             |             |
| CALD1       | CALD1       | 23.95859834 | 3.521344766 | 91.43493117 |             |
| 38.24964346 |             |             |             |             |             |
| CAD         | CAD         | 4071.92004  | 8055.076152 | 6064.812081 |             |
| 7200.740571 |             |             |             |             |             |
| SHARPIN     | SHARPIN     | 2368.776201 | 1824.056589 | 2302.599181 |             |
| 2322.43989  |             |             |             |             |             |
| NDUFB4      | NDUFB4      | 6453.196379 | 8950.378058 | 6206.424718 |             |
| 6613.265278 |             |             |             |             |             |
| ERMP1       | ERMP1       | 3681.290719 | 5436.956318 | 1687.085986 |             |
| 2701.994044 |             |             |             |             |             |
| PHKG2       | PHKG2       | 2803.156006 | 2214.045521 | 2210.04919  |             |
| 2255.748204 |             |             |             |             |             |
| SH2D5       | SH2D5       | 0           | 0           | 2.230120273 | 1.961520177 |
| SCGB2B3P    | SCGB2B3P    |             | 4.166712755 | 1.760672383 | 0           |
| 0           |             |             |             |             |             |
| SPEG        | SPEG        | 3.125034566 | 0           | 28.99156354 | 6.865320621 |
| PSMG1       | PSMG1       | 5775.063878 | 3725.582762 | 4246.148999 |             |
| 3844.579548 |             |             |             |             |             |
| SNORD56B    | SNORD56B    |             | 1.041678189 | 2.641008574 | 0           |
| 0           |             |             |             |             |             |
| SNORD83B    | SNORD83B    |             | 58.33397857 | 35.21344766 |             |
| 45.71746559 | 34.3266031  |             |             |             |             |
| SNORD83A    | SNORD83A    |             | 40.62544936 | 23.76907717 |             |
| 45.71746559 | 42.17268381 |             |             |             |             |
| RNU86       | RNU86       | 252.0861217 | 130.2897563 | 267.6144327 |             |
| 210.8634191 |             |             |             |             |             |
| TSPY26P     | TSPY26P     | 14.58349464 | 8.803361914 | 36.7969845  |             |
| 33.34584301 |             |             |             |             |             |
| SNORD32A    | SNORD32A    |             | 21.87524196 | 25.52974955 |             |
| 37.91204463 | 40.21116364 |             |             |             |             |
| SNORD33     | SNORD33     | 1.041678189 | 7.923025723 | 11.15060136 |             |
| 8.826840798 |             |             |             |             |             |



|             |             |             |             |             |
|-------------|-------------|-------------|-------------|-------------|
| SNORD34     | SNORD34     | 35.41705842 | 11.44437049 | 33.45180409 |
| 23.53824213 |             |             |             |             |
| SNORD35A    | SNORD35A    |             | 18.7502074  | 20.2477324  |
| 24.531323   | 25.49976231 |             |             |             |
| SNORD36B    | SNORD36B    |             | 18.7502074  | 14.08537906 |
| 22.30120273 | 24.51900222 |             |             |             |
| SNORD36C    | SNORD36C    |             | 35.41705842 | 19.36739621 |
| 34.56686422 | 21.57672195 |             |             |             |
| ISY1-RAB43  | ISY1-RAB43  |             | 4680.260102 | 4469.466844 |
| 4169.209849 | 3940.694036 |             |             |             |
| SLC4A2      | SLC4A2      | 2061.481135 | 3102.304739 | 1774.060677 |
| 1965.443218 |             |             |             |             |
| HDX         | HDX         | 215.6273851 | 154.0588335 | 121.5415549 |
| 85.32612771 |             |             |             |             |
| PIGH        | PIGH        | 1936.479753 | 1150.599402 | 2588.054576 |
| 1973.289298 |             |             |             |             |
| RAP2B       | RAP2B       | 2746.905384 | 4547.816765 | 2140.915462 |
| 1810.483124 |             |             |             |             |
| RDH8        | RDH8        | 0           | 0           | 1.961520177 |
| KDELC1      | KDELC1      | 1065.636787 | 698.1065998 | 277.6499739 |
| 304.0356275 |             |             |             |             |
| DGUOK       | DGUOK       | 5489.644054 | 4612.961643 | 5876.366918 |
| 5119.567663 |             |             |             |             |
| SP1         | SP1         | 1104.17888  | 2584.667058 | 2130.87992  |
| 1917.385973 |             |             |             |             |
| THOC2       | THOC2       | 6251.11081  | 5957.235007 | 6121.680148 |
| 6749.59093  |             |             |             |             |
| KLHL18      | KLHL18      | 2562.528344 | 1814.372891 | 2566.868434 |
| 2010.558182 |             |             |             |             |
| MRAS        | MRAS        | 1.041678189 | 1.760672383 | 23.41626286 |
| 18.63444168 |             |             |             |             |
| POLR2A      | POLR2A      | 10770.95247 | 19627.09539 | 16017.83886 |
| 14852.63078 |             |             |             |             |
| COL1A1      | COL1A1      | 8.33342551  | 18.48706002 | 44.60240545 |
| 13.73064124 |             |             |             |             |
| SPRED3      | SPRED3      | 1.041678189 | 29.93143051 | 0           |
| CNIH2       | CNIH2       | 3.125034566 | 6.16235334  | 9.807600887 |
| 17.6536816  |             |             |             | 13.38072164 |
| DIRAS3      | DIRAS3      | 6.250069132 | 7.923025723 | 10.03554123 |
| 94.15296851 |             |             |             |             |
| ASH2L       | ASH2L       | 6270.902696 | 5175.496469 | 5526.238035 |
| 5559.928943 |             |             |             |             |
| PIAS2       | PIAS2       | 1861.478923 | 1759.792047 | 1654.749242 |
| 1923.270534 |             |             |             |             |
| UPP1        | UPP1        | 1914.604511 | 893.5412343 | 2216.739551 |
| 1464.274812 |             |             |             |             |
| CCNF        | CCNF        | 12165.75957 | 12045.64011 | 6093.803645 |
| 7570.487124 |             |             |             |             |
| HNRNPA0     | HNRNPA0     | 1300.014379 | 3095.262049 | 1942.434757 |
| 2153.749155 |             |             |             |             |

|             |             |             |             |             |             |
|-------------|-------------|-------------|-------------|-------------|-------------|
| IGFBP3      | IGFBP3      | 106.2511752 | 44.01680957 | 217.4367266 |             |
| 54.92256497 |             |             |             |             |             |
| IGFBP2      | IGFBP2      | 4.166712755 | 22.88874098 | 28.99156354 |             |
| 74.53776674 |             |             |             |             |             |
| NPAT        | NPAT        | 3567.747796 | 3999.367318 | 5811.69343  |             |
| 5009.722533 |             |             |             |             |             |
| MPV17       | MPV17       | 6012.566505 | 4707.157616 | 4918.530261 |             |
| 5474.602815 |             |             |             |             |             |
| PABPN1      | PABPN1      | 5612.562081 | 8064.75985  | 6821.937914 |             |
| 6422.997821 |             |             |             |             |             |
| SLC1A6      | SLC1A6      | 0           | 0.880336191 | 0           |             |
| SURF4       | SURF4       | 43403.60509 | 35355.18178 | 27344.61972 |             |
| 35825.20452 |             |             |             |             |             |
| TMEM249     | TMEM249     | 157.2934065 | 164.6228678 | 128.2319157 |             |
| 203.9980984 |             |             |             |             |             |
| SQRDL       | SQRDL       | 18109.57531 | 14111.78915 | 15065.5775  |             |
| 12772.43863 |             |             |             |             |             |
| SNORD98     | SNORD98     | 5.208390943 | 9.683698106 | 6.690360818 |             |
| 12.74988115 |             |             |             |             |             |
| SNORD99     | SNORD99     | 4.166712755 | 19.36739621 | 8.92048109  |             |
| 21.57672195 |             |             |             |             |             |
| SNORD110    | SNORD110    |             | 129.1680954 | 92.4353001  |             |
| 119.3114346 | 162.8061747 |             |             |             |             |
| SNORA49     | SNORA49     | 0           | 0           | 0.980760089 |             |
| SNORD111    | SNORD111    |             | 0           | 1.760672383 | 1.115060136 |
|             | 0.980760089 |             |             |             |             |
| HULC        | HULC        | 0           | 0.880336191 | 0           | 0.980760089 |
| CHRM3-AS2   | CHRM3-AS2   |             | 386.462608  | 344.2114509 |             |
| 322.2523794 | 219.6902599 |             |             |             |             |
| LOC440416   | LOC440416   |             | 0           | 0           | 2.230120273 |
| PDK1        | PDK1        | 1163.554537 | 1728.099944 | 1924.593795 | 0           |
| 2700.032524 |             |             |             |             |             |
| CCS         | CCS         | 864.5928966 | 1174.368479 | 880.8975076 |             |
| 1143.566263 |             |             |             |             |             |
| MRGPRF      | MRGPRF      | 0           | 0           | 0.980760089 |             |
| TINAGL1     | TINAGL1     | 0           | 9.683698106 | 0           | 0.980760089 |
| TRIM45      | TRIM45      | 38.54209298 | 44.01680957 | 24.531323   |             |
| 37.26888337 |             |             |             |             |             |
| ZDHHC7      | ZDHHC7      | 3068.783944 | 2897.186406 | 2830.022626 |             |
| 3396.372187 |             |             |             |             |             |
| TKT         | TKT         | 6963.618691 | 8827.130992 | 4716.704376 |             |
| 6628.957439 |             |             |             |             |             |
| POLD2       | POLD2       | 10940.74602 | 7955.598162 | 8900.410008 |             |
| 11001.18591 |             |             |             |             |             |
| ZNF619      | ZNF619      | 348.9621932 | 296.6732965 | 543.0342864 |             |
| 321.6893091 |             |             |             |             |             |
| CD84        | CD84        | 2762.530556 | 2869.895984 | 3783.399042 |             |
| 3835.752707 |             |             |             |             |             |
| LIM2        | LIM2        | 9.375103698 | 0           | 10.03554123 | 0           |
| IL11RA      | IL11RA      | 162.5017974 | 125.0077392 | 90.31987104 |             |

|              |              |             |             |             |
|--------------|--------------|-------------|-------------|-------------|
| 206.9403787  |              |             |             |             |
| MOGS         | MOGS         | 3089.617508 | 4150.785143 | 3262.665959 |
| 3597.428005  |              |             |             |             |
| ZNF473       | ZNF473       | 704.1744556 | 715.7133236 | 1723.882971 |
| 1032.740373  |              |             |             |             |
| RLIM         | RLIM         | 1741.685932 | 1954.346345 | 2796.570822 |
| 2227.306161  |              |             |             |             |
| LOC100134391 | LOC100134391 | 0           | 0           | 0           |
| TUBA1A       | TUBA1A       | 8995.932838 | 10831.6565  | 0.980760089 |
| 9780.139604  |              |             |             |             |
| C3orf52      | C3orf52      | 313.5451348 | 209.5200136 | 277.6499739 |
| 162.8061747  |              |             |             |             |
| WWC3         | WWC3         | 955.218899  | 1139.155032 | 1179.733624 |
| 1159.258425  |              |             |             |             |
| KAT5         | KAT5         | 3854.209298 | 3174.492306 | 4986.548929 |
| 3773.964821  |              |             |             |             |
| VTI1A        | VTI1A        | 2158.357207 | 1839.022304 | 1969.196201 |
| 1883.05937   |              |             |             |             |
| ELMOD1       | ELMOD1       | 2.083356377 | 9.683698106 | 7.805420954 |
| 6.865320621  |              |             |             |             |
| LE01         | LE01         | 4605.259272 | 3175.372643 | 3273.81656  |
| 3241.412093  |              |             |             |             |
| WRB          | WRB          | 1934.396396 | 1901.526174 | 1407.205892 |
| 1525.081938  |              |             |             |             |
| PKP4         | PKP4         | 191.6687867 | 590.7055845 | 192.9054036 |
| 191.2482173  |              |             |             |             |
| TTC28        | TTC28        | 30.20866747 | 150.5374887 | 45.71746559 |
| 67.67244612  |              |             |             |             |
| ASCC1        | ASCC1        | 3526.080669 | 3267.807943 | 3135.549103 |
| 3672.946532  |              |             |             |             |
| ZNF835       | ZNF835       | 16.66685102 | 20.2477324  | 72.47890886 |
| 43.1534439   |              |             |             |             |
| MEF2B        | MEF2B        | 66.66740408 | 96.83698106 | 132.6921562 |
| 101.0182891  |              |             |             |             |
| RBM14        | RBM14        | RBM14       | 7336.539483 | 6465.18899  |
| 6997.002355  | 7142.875726  |             |             |             |
| POU5F1B      | POU5F1B      | 0           | 28.99156354 | 11.76912106 |
| FYT1D1       | FYT1D1       | 5412.559868 | 4626.166686 | 6955.74513  |
| 5612.889987  |              |             |             |             |
| TMIE         | TMIE         | 0           | 0.880336191 | 28.99156354 |
| 26.48052239  |              |             |             |             |
| LOC100132057 | LOC100132057 | 6.250069132 | 7.042689532 |             |
| 12.2656615   | 16.67292151  |             |             |             |
| PIGC         | PIGC         | 2004.188835 | 1705.211203 | 2504.425066 |
| 2144.922314  |              |             |             |             |
| FNDC5        | FNDC5        | 1.041678189 | 7.042689532 | 0           |
| 6.865320621  |              |             |             |             |
| DPYD         | DPYD         | AS1         | 158.3350847 | 104.7600068 |
| 110.3909535  | 125.5372913  |             |             |             |
| LAMTOR4      | LAMTOR4      | 4222.963377 | 4658.739125 | 4180.360451 |
| 4624.283818  |              |             |             |             |
| FSD1         | FSD1         | 834.3842291 | 939.3187163 | 400.3065889 |

|                 |               |               |             |  |
|-----------------|---------------|---------------|-------------|--|
| 984.683129      |               |               |             |  |
| CD300A CD300A   | 228.1275233   | 149.6571525   | 299.9511767 |  |
| 320.708549      |               |               |             |  |
| SPCS3 SPCS3     | 9674.065338   | 9041.052686   | 6618.996969 |  |
| 6736.841049     |               |               |             |  |
| FILIP1 FILIP1   | 1.041678189   | 1.760672383   | 3.345180409 |  |
| 2.942280266     |               |               |             |  |
| ATP6V0E2        | ATP6V0E2      | 7302.164103   | 4765.259804 |  |
| 5554.114539     | 4057.404487   |               |             |  |
| IFRD1 IFRD1     | 3265.661122   | 2361.061665   | 4342.044171 |  |
| 3181.585728     |               |               |             |  |
| PTH2R PTH2R     | 17.70852921   | 9.683698106   | 1.115060136 |  |
| 8.826840798     |               |               |             |  |
| MRPL39 MRPL39   | 6011.524827   | 4692.1919     | 4779.147744 |  |
| 5439.295452     |               |               |             |  |
| NSRP1 NSRP1     | 1564.600639   | 1272.085797   | 2032.754628 |  |
| 1426.025169     |               |               |             |  |
| RNF121 RNF121   | 832.3008728   | 872.4131657   | 709.1782467 |  |
| 648.2824186     |               |               |             |  |
| PLCB4 PLCB4     | 0 2.641008574 | 0             | 0           |  |
| 2-Mar 2-Mar     | 1078.136925   | 661.1324798   | 890.9330489 |  |
| 757.1467885     |               |               |             |  |
| IBA57 IBA57     | 828.13416     | 488.5865862   | 706.9481264 |  |
| 465.8610421     |               |               |             |  |
| CRTAM CRTAM     | 670.8407535   | 390.869269    | 2933.723219 |  |
| 1732.022317     |               |               |             |  |
| SDCCAG3 SDCCAG3 | 519.7974162   | 598.6286102   | 699.1427054 |  |
| 848.3574767     |               |               |             |  |
| TP53BP2 TP53BP2 | 2007.31387    | 3078.535661   | 3880.409274 |  |
| 3493.467436     |               |               |             |  |
| NCAPH NCAPH     | 7644.876227   | 9250.5727     | 3719.840615 |  |
| 6218.018962     |               |               |             |  |
| RCCD1 RCCD1     | 980.2191756   | 1055.523094   | 828.4896812 |  |
| 1125.912582     |               |               |             |  |
| CDK11A CDK11A   | 1257.305574   | 1282.649831   | 1452.923358 |  |
| 1166.123745     |               |               |             |  |
| RASA4 RASA4     | 159.3767629   | 213.0413583   | 188.445163  |  |
| 245.1900222     |               |               |             |  |
| JAKMIP3 JAKMIP3 | 0 0           | 0 18.63444168 |             |  |
| GPR107 GPR107   | 1138.55426    | 1880.398105   | 834.0649819 |  |
| 1084.720658     |               |               |             |  |
| SLC35G2 SLC35G2 | 290.6282146   | 93.31563629   | 476.1306782 |  |
| 225.5748204     |               |               |             |  |
| SLC26A6 SLC26A6 | 1747.936001   | 1815.253227   | 732.5945095 |  |
| 1185.738947     |               |               |             |  |
| RAB37 RAB37     | 2238.566428   | 3190.338358   | 593.2119925 |  |
| 610.0327752     |               |               |             |  |
| RCN2 RCN2       | 4317.756092   | 4041.623455   | 3118.823201 |  |
| 3076.644398     |               |               |             |  |
| FGD1 FGD1       | 202.0855686   | 186.6312726   | 399.1915288 |  |

|              |              |             |             |             |             |
|--------------|--------------|-------------|-------------|-------------|-------------|
| 254.9976231  |              |             |             |             |             |
| ANKRD26      | ANKRD26      | 764.5917905 | 523.8000339 | 413.6873106 |             |
| 608.071255   |              |             |             |             |             |
| SLC4A9       | SLC4A9       | 4.166712755 | 4.401680957 | 5.575300681 |             |
| 5.884560532  |              |             |             |             |             |
| APPL2        | APPL2        | 1136.470904 | 1316.982942 | 996.8637618 |             |
| 1215.16175   |              |             |             |             |             |
| NAALADL1     | NAALADL1     |             | 263.5445817 | 383.8265795 |             |
| 200.7108245  |              | 399.1693561 |             |             |             |
| ANKRD18A     | ANKRD18A     |             | 5.208390943 | 14.08537906 |             |
| 25.64638313  |              | 68.65320621 |             |             |             |
| CDPF1        | CDPF1        | 826.0508036 | 553.7314644 | 611.0529547 |             |
| 604.1482146  |              |             |             |             |             |
| ZNF474       | ZNF474       | 3.125034566 | 7.042689532 | 0           | 1.961520177 |
| TUBA3E       | TUBA3E       | 10.41678189 | 0           | 0           | 3.923040355 |
| DMRT2        | DMRT2        | 65.62572589 | 23.76907717 | 26.76144327 |             |
| 5.884560532  |              |             |             |             |             |
| TARDBP       | TARDBP       | 16378.30616 | 14126.75486 | 13349.49995 |             |
| 15003.66784  |              |             |             |             |             |
| SHOC2        | SHOC2        | 5030.263973 | 4517.885334 | 6071.502442 |             |
| 4398.708998  |              |             |             |             |             |
| SKA3         | SKA3         | 6309.444789 | 4266.98952  | 3358.56113  |             |
| 3673.927292  |              |             |             |             |             |
| RNF103-CHMP3 | RNF103-CHMP3 |             | 2468.777307 | 1721.057254 |             |
| 3020.697909  |              | 2402.862217 |             |             |             |
| ZNF652       | ZNF652       | 478.1302886 | 965.728802  | 1234.371571 |             |
| 579.6292124  |              |             |             |             |             |
| CLP1         | CLP1         | 2829.197961 | 2222.848883 | 2400.724473 |             |
| 2292.036327  |              |             |             |             |             |
| ALKBH2       | ALKBH2       | 812.5089872 | 589.8252483 | 1028.085446 |             |
| 967.0294474  |              |             |             |             |             |
| HSD17B13     | HSD17B13     |             | 20.83356377 | 2.641008574 | 0           |
| 0            |              |             |             |             |             |
| CD46         | CD46         | 6290.694582 | 5333.076648 | 9240.503349 |             |
| 7508.699239  |              |             |             |             |             |
| NACAD        | NACAD        | 3.125034566 | 3.521344766 | 3.345180409 |             |
| 7.846080709  |              |             |             |             |             |
| ALDH3B1      | ALDH3B1      | 1.041678189 | 7.923025723 | 2.230120273 |             |
| 1.961520177  |              |             |             |             |             |
| ATP1A1       | ATP1A1       | 2550.028206 | 4509.081973 | 2943.75876  |             |
| 2697.090244  |              |             |             |             |             |
| KCNE2        | KCNE2        | 9.375103698 | 2.641008574 | 5.575300681 |             |
| 6.865320621  |              |             |             |             |             |
| IFNL3        | IFNL3        | 0           | 0           | 0.980760089 |             |
| EHHADH       | EHHADH       | 256.2528344 | 446.3304491 | 167.2590204 |             |
| 310.9009481  |              |             |             |             |             |
| SBK3         | SBK3         | 0           | 1.760672383 | 0           | 0           |
| MICU1        | MICU1        | 2455.235491 | 2488.710413 | 2085.162455 |             |
| 2374.420175  |              |             |             |             |             |
| TRIM32       | TRIM32       | 1908.354442 | 1565.237748 | 1336.957103 |             |

|                 |               |               |             |  |
|-----------------|---------------|---------------|-------------|--|
| 1539.793339     |               |               |             |  |
| SOWAHD SOWAHD   | 42.70880574   | 74.82857627   | 57.98312709 |  |
| 39.23040355     |               |               |             |  |
| FBX045 FBX045   | 3801.083711   | 2942.963888   | 2557.947953 |  |
| 2251.825164     |               |               |             |  |
| RIMBP3C RIMBP3C | 12.50013826   | 10.5640343    | 16.72590204 |  |
| 30.40356275     |               |               |             |  |
| SFTPA2 SFTPA2   | 7.291747321   | 0 0           | 0           |  |
| ZNF846 ZNF846   | 92.70935879   | 97.71731725   | 340.0933416 |  |
| 162.8061747     |               |               |             |  |
| GRAPL GRAPL     | 2.083356377   | 1.760672383   | 13.38072164 |  |
| 2.942280266     |               |               |             |  |
| DPEP3 DPEP3     | 11.45846008   | 6.16235334    | 20.07108245 |  |
| 11.76912106     |               |               |             |  |
| ST3GAL1 ST3GAL1 | 6201.110257   | 6761.862286   | 5760.400664 |  |
| 5274.527757     |               |               |             |  |
| KATNAL1 KATNAL1 | 1013.552878   | 1017.668637   | 588.7517519 |  |
| 500.1876452     |               |               |             |  |
| PEAR1 PEAR1     | 0 0.880336191 | 22.30120273   | 0           |  |
| UQCC3 UQCC3     | 931.2603007   | 683.1408846   | 550.8397073 |  |
| 707.1280239     |               |               |             |  |
| GNAT3 GNAT3     | 0 0           | 2.230120273   | 0           |  |
| MAZ MAZ         | 3120.867853   | 3737.907469   | 2939.298519 |  |
| 2674.532762     |               |               |             |  |
| ICT1 ICT1       | 2527.111286   | 2241.335943   | 1846.539586 |  |
| 1806.560083     |               |               |             |  |
| CYP2B6 CYP2B6   | 19.79188559   | 0 0           | 0           |  |
| PNMT PNMT       | 0 1.760672383 | 0             | 1.961520177 |  |
| EXOSC10 EXOSC10 | 10661.57626   | 7921.265051   | 7817.686615 |  |
| 8416.883081     |               |               |             |  |
| ZNF266 ZNF266   | 1220.846837   | 1500.973206   | 1872.185969 |  |
| 2165.518276     |               |               |             |  |
| NPIP3 NPIP3     | 232.2942361   | 351.2541404   | 244.1981698 |  |
| 270.6897845     |               |               |             |  |
| MRPL13 MRPL13   | 9104.267369   | 8498.765592   | 6849.814417 |  |
| 7123.260524     |               |               |             |  |
| SYT1 SYT1       | 2.083356377   | 0 1.115060136 | 0           |  |
| MRC2 MRC2       | 386.462608    | 477.1422158   | 199.5957644 |  |
| 216.7479796     |               |               |             |  |
| NR2F6 NR2F6     | 645.840477    | 682.2605484   | 778.3119751 |  |
| 1159.258425     |               |               |             |  |
| ALG12 ALG12     | 1954.188282   | 1849.586338   | 1616.837198 |  |
| 1804.598563     |               |               |             |  |
| RWDD2A RWDD2A   | 252.0861217   | 226.2464012   | 296.6059962 |  |
| 265.785984      |               |               |             |  |
| CTPS2 CTPS2     | 385.4209298   | 542.2870939   | 386.9258673 |  |
| 627.6864567     |               |               |             |  |
| RPP40 RPP40     | 1065.636787   | 593.346593    | 882.0125678 |  |
| 750.2814678     |               |               |             |  |
| PRKRIP1 PRKRIP1 | 1367.723462   | 1121.548308   | 1504.216124 |  |

|                 |               |             |             |             |
|-----------------|---------------|-------------|-------------|-------------|
| 1426.025169     |               |             |             |             |
| LRRK1 LRRK1     | 11.45846008   | 52.82017149 | 4.460240545 |             |
| 14.71140133     |               |             |             |             |
| FTSJ3 FTSJ3     | 9656.356809   | 7738.155123 | 6743.883704 |             |
| 8799.379516     |               |             |             |             |
| TRIT1 TRIT1     | 1600.017698   | 1048.480404 | 1379.329389 |             |
| 1341.679801     |               |             |             |             |
| FRMD3 FRMD3     | 0 0           | 230.8174482 | 76.49928692 |             |
| HMHA1 HMHA1     | 24883.60857   | 26692.67366 | 18830.02052 |             |
| 20157.5621      |               |             |             |             |
| LINC00028       | LINC00028     | 0           | 0.880336191 | 5.575300681 |
| 0               |               |             |             |             |
| LOC101928837    | LOC101928837  | 0           | 0           | 2.942280266 |
| LOC100132356    | LOC100132356  | 77.08418596 | 49.29882672 |             |
| 197.3656441     | 105.9220896   |             |             |             |
| LRIT3 LRIT3     | 1.041678189   | 0           | 0           | 0           |
| ZFP69 ZFP69     | 205.2106032   | 242.9727888 | 352.3590031 |             |
| 498.226125      |               |             |             |             |
| MED27 MED27     | 4224.005055   | 3307.423071 | 3105.44248  |             |
| 3133.528483     |               |             |             |             |
| DLD DLD         | 14801.20538   | 11024.45013 | 9315.212378 |             |
| 11380.74007     |               |             |             |             |
| NDUFAF3 NDUFAF3 | 5774.0222     | 5566.365738 | 4552.790536 |             |
| 4445.785482     |               |             |             |             |
| MKNK1 MKNK1     | 3215.660569   | 2148.900643 | 1827.583563 |             |
| 1841.867447     |               |             |             |             |
| PTHLH PTHLH     | 30.20866747   | 13.20504287 | 43.48734531 |             |
| 8.826840798     |               |             |             |             |
| MKNK2 MKNK2     | 1551.058823   | 3935.983112 | 1568.889612 |             |
| 1776.156521     |               |             |             |             |
| MYH10 MYH10     | 1854.187176   | 1957.86769  | 925.4999131 |             |
| 1301.468638     |               |             |             |             |
| LNPEP LNPEP     | 2826.072926   | 2780.101693 | 3969.614085 |             |
| 3055.067676     |               |             |             |             |
| RNF182 RNF182   | 0 1.760672383 | 0           | 0           |             |
| ABRACL ABRACL   | 11664.71236   | 12045.64011 | 7893.510705 |             |
| 8369.806597     |               |             |             |             |
| RBM25 RBM25     | 5905.273652   | 5867.440716 | 6148.441591 |             |
| 5794.330604     |               |             |             |             |
| OTOF OTOF       | 222.9191324   | 250.8958146 | 104.8156528 |             |
| 191.2482173     |               |             |             |             |
| AKNA AKNA       | 1773.977955   | 4573.346515 | 1753.989594 |             |
| 1941.904976     |               |             |             |             |
| SMOC1 SMOC1     | 0 0           | 0           | 1.961520177 |             |
| C9orf163        | C9orf163      | 9.375103698 | 8.803361914 |             |
| 6.690360818     | 6.865320621   |             |             |             |
| MCOLN1 MCOLN1   | 813.5506654   | 756.2087884 | 858.5963049 |             |
| 647.3016585     |               |             |             |             |
| SRPR SRPR       | 17034.56342   | 15635.6511  | 15229.49134 |             |
| 16188.42602     |               |             |             |             |

|              |              |             |             |             |             |
|--------------|--------------|-------------|-------------|-------------|-------------|
| B3GNT4       | B3GNT4       | 0           | 6.16235334  | 14.49578177 | 11.76912106 |
| PET117       | PET117       | 1375.015209 | 1208.701591 | 1170.813143 |             |
| 1089.624459  |              |             |             |             |             |
| NEK1         | NEK1         | 1516.683443 | 963.9681296 | 1253.327593 |             |
| 1053.336335  |              |             |             |             |             |
| PTAFR        | PTAFR        | 20.83356377 | 18.48706002 | 42.37228518 |             |
| 30.40356275  |              |             |             |             |             |
| MPPED2       | MPPED2       | 0           | 7.042689532 | 0           | 12.74988115 |
| SFRP5        | SFRP5        | 0           | 0           | 8.92048109  | 1.961520177 |
| DCDC1        | DCDC1        | 2.083356377 | 0           | 0           | 0.980760089 |
| LOC101928295 | LOC101928295 | 0           | 4.401680957 | 13.38072164 |             |
| 7.846080709  |              |             |             |             |             |
| SLC9A3R2     | SLC9A3R2     |             | 11.45846008 | 14.96571525 |             |
| 23.41626286  | 19.61520177  |             |             |             |             |
| DLL1         | DLL1         | 5.208390943 | 1.760672383 | 129.3469758 |             |
| 61.78788559  |              |             |             |             |             |
| PPIL4        | PPIL4        | 2007.31387  | 1419.101941 | 2746.393116 |             |
| 2211.614     |              |             |             |             |             |
| ARL4D        | ARL4D        | 422.9213446 | 159.3408507 | 191.7903434 |             |
| 134.3641321  |              |             |             |             |             |
| TEK          | TEK          | 0           | 0           | 0.980760089 |             |
| HNF1B        | HNF1B        | 145.8349464 | 165.503204  | 13.38072164 |             |
| 30.40356275  |              |             |             |             |             |
| SMTNL2       | SMTNL2       | 1.041678189 | 7.042689532 | 0           | 0           |
| DUOXA1       | DUOXA1       | 0           | 0           | 10.78836098 |             |
| NNT          | NNT          | 8421.968156 | 11351.05485 | 5498.361532 |             |
| 8127.558855  |              |             |             |             |             |
| WDR60        | WDR60        | 314.586813  | 288.7502708 | 422.6077916 |             |
| 409.9577171  |              |             |             |             |             |
| PSPH         | PSPH         | 1116.679018 | 978.9338449 | 984.5981003 |             |
| 974.8755281  |              |             |             |             |             |
| CRYGS        | CRYGS        | 8.33342551  | 13.20504287 | 14.49578177 |             |
| 15.69216142  |              |             |             |             |             |
| XAF1         | XAF1         | 8218.840909 | 3724.702426 | 10072.33821 |             |
| 4130.961493  |              |             |             |             |             |
| BEX1         | BEX1         | 3.125034566 | 11.44437049 | 34.56686422 |             |
| 20.59596186  |              |             |             |             |             |
| DBNDD2       | DBNDD2       | 277.0863982 | 194.5542983 | 738.1698102 |             |
| 531.5719681  |              |             |             |             |             |
| C14orf182    | C14orf182    |             | 200.0022122 | 145.2554716 |             |
| 383.5806869  | 730.6662661  |             |             |             |             |
| NAA30        | NAA30        | 3723.999525 | 2695.589418 | 2697.33047  |             |
| 2417.573619  |              |             |             |             |             |
| ITGA7        | ITGA7        | 27.08363291 | 38.73479242 | 35.68192436 |             |
| 45.11496408  |              |             |             |             |             |
| C15orf65     | C15orf65     |             | 0           | 0.880336191 | 6.690360818 |
| 9.807600887  |              |             |             |             |             |
| DEXI         | DEXI         | 1094.803776 | 1067.8478   | 1630.217919 |             |
| 1377.967925  |              |             |             |             |             |
| PYGM         | PYGM         | 38.54209298 | 26.41008574 | 65.78854804 |             |



|                 |                 |             |             |             |  |             |
|-----------------|-----------------|-------------|-------------|-------------|--|-------------|
| 37.26888337     |                 |             |             |             |  |             |
| WDR75           | WDR75           | 6710.490892 | 4885.865862 | 7203.28848  |  |             |
| 7646.005651     |                 |             |             |             |  |             |
| EID2B           | EID2B           | 138.5431991 | 198.0756431 | 138.2674569 |  |             |
| 154.960094      |                 |             |             |             |  |             |
| SALL2           | SALL2           | 15.62517283 | 75.70891246 | 62.44336763 |  |             |
| 86.3068878      |                 |             |             |             |  |             |
| ZNF761          | ZNF761          | 1325.014656 | 1380.367148 | 1908.982953 |  |             |
| 1665.330631     |                 |             |             |             |  |             |
| SNORD21         | SNORD21         | 1.041678189 | 5.282017149 | 4.460240545 |  |             |
| 1.961520177     |                 |             |             |             |  |             |
| CEP290          | CEP290          | 390.6293208 | 478.9028881 | 540.8041661 |  |             |
| 434.4767193     |                 |             |             |             |  |             |
| C11orf48        | C11orf48        |             | 6145.901313 | 4987.984861 |  |             |
| 4704.438715     |                 | 4825.339636 |             |             |  |             |
| ST7L            | ST7L            | 446.879943  | 305.4766584 | 632.2390973 |  |             |
| 477.6301632     |                 |             |             |             |  |             |
| DSCC1           | DSCC1           | 2260.441669 | 2254.540986 | 1043.696288 |  |             |
| 1501.543696     |                 |             |             |             |  |             |
| GSK3B           | GSK3B           | 1326.056334 | 1922.654242 | 1094.989054 |  |             |
| 1250.469113     |                 |             |             |             |  |             |
| RPS5            | RPS5            | 13388.68976 | 13135.49631 | 14960.76185 |  |             |
| 12926.41797     |                 |             |             |             |  |             |
| TMEM67          | TMEM67          | 289.5865365 | 198.0756431 | 330.0578003 |  |             |
| 372.6888337     |                 |             |             |             |  |             |
| DYM             | DYM             | 2570.86177  | 2106.644506 | 2392.919052 |  |             |
| 2491.130625     |                 |             |             |             |  |             |
| CIPC            | CIPC            | 1098.970489 | 1064.326455 | 1334.726983 |  |             |
| 1153.373864     |                 |             |             |             |  |             |
| MPV17L2         | MPV17L2         | 2267.733417 | 1273.846469 | 1804.1673   |  |             |
| 1362.275763     |                 |             |             |             |  |             |
| FUT10           | FUT10           | 414.5879191 | 307.2373308 | 245.31323   |  |             |
| 492.3415645     |                 |             |             |             |  |             |
| ZNF687          | ZNF687          | 109.3762098 | 242.0924526 | 260.9240719 |  |             |
| 195.1712576     |                 |             |             |             |  |             |
| FAM167B         | FAM167B         | 1.041678189 | 8.803361914 | 12.2656615  |  | 0           |
| DMRT1           | DMRT1           | 0           | 0.880336191 | 0           |  | 0           |
| ANKHD1-EIF4EBP3 | ANKHD1-EIF4EBP3 | 8245.924542 | 7901.017318 |             |  |             |
| 10542.89359     |                 | 9955.69566  |             |             |  |             |
| 1-Mar           | 1-Mar           | 0           | 0           | 2.942280266 |  |             |
| METTL20         | METTL20         | 62.50069132 | 44.01680957 | 161.6837198 |  |             |
| 81.40308736     |                 |             |             |             |  |             |
| DLX3            | DLX3            | 0           | 0           | 2.230120273 |  | 3.923040355 |
| DDOST           | DDOST           | 23053.37999 | 17729.09056 | 18033.86758 |  |             |
| 17476.16402     |                 |             |             |             |  |             |
| PPME1           | PPME1           | 3811.500492 | 2926.2375   | 3476.757505 |  |             |
| 4690.975504     |                 |             |             |             |  |             |
| ZNF736          | ZNF736          | 185.4187176 | 628.5600407 | 573.14091   |  |             |
| 394.2655556     |                 |             |             |             |  |             |
| ZNF407          | ZNF407          | 654.1739025 | 1041.437714 | 926.6149732 |  |             |

|             |             |             |             |             |
|-------------|-------------|-------------|-------------|-------------|
| 835.6075955 |             |             |             |             |
| IFITM10     | IFITM10     | 14.58349464 | 63.38420578 | 3.345180409 |
| 83.36460754 |             |             |             |             |
| ZFAND1      | ZFAND1      | 1379.181922 | 1128.590997 | 1809.742601 |
| 1370.121844 |             |             |             |             |
| ERICH5      | ERICH5      | 13.54181645 | 3.521344766 | 14.49578177 |
| 20.59596186 |             |             |             |             |
| IQCG        | IQCG        | 709.3828465 | 985.9765344 | 1548.818529 |
| 2920.703544 |             |             |             |             |
| SDSL        | SDSL        | 12.50013826 | 12.32470668 | 1.115060136 |
| 9.807600887 |             |             |             |             |
| TAS2R60     | TAS2R60     | 0           | 0           | 2.942280266 |
| 0           |             |             |             |             |
| SLC36A1     | SLC36A1     | 333.3370204 | 497.3899482 | 477.2457383 |
| 454.0919211 |             |             |             |             |
| ARID4A      | ARID4A      | 1931.271362 | 1532.665309 | 2824.447325 |
| 2095.884309 |             |             |             |             |
| CALR3       | CALR3       | 12.50013826 | 11.44437049 | 18.95602232 |
| 4.903800443 |             |             |             |             |
| NEIL2       | NEIL2       | 783.3419979 | 797.5845894 | 1235.486631 |
| 1184.758187 |             |             |             |             |
| OLFM2       | OLFM2       | 104.1678189 | 58.98252483 | 95.89517172 |
| 65.71092594 |             |             |             |             |
| SNRPN       | SNRPN       | 4609.425985 | 4796.071571 | 9073.244329 |
| 6868.262901 |             |             |             |             |
| NMNAT1      | NMNAT1      | 720.8413066 | 610.9533169 | 919.9246124 |
| 722.8201853 |             |             |             |             |
| ARV1        | ARV1        | 1486.474775 | 1215.74428  | 1381.559509 |
| 1565.293102 |             |             |             |             |
| VPS29       | VPS29       | 8352.175717 | 8396.646594 | 5839.569934 |
| 6868.262901 |             |             |             |             |
| PARD3B      | PARD3B      | 9.375103698 | 6.16235334  | 2.230120273 |
| 3.923040355 |             |             |             |             |
| DLG3        | DLG3        | 1656.26832  | 2263.344348 | 797.2679974 |
| 1267.142035 |             |             |             |             |
| FBX041      | FBX041      | 226.0441669 | 662.012816  | 323.3674395 |
| 489.3992842 |             |             |             |             |
| KIAA0368    | KIAA0368    |             | 5492.769089 | 5778.526761 |
| 5419.192262 | 5693.312315 |             |             |             |
| CBX1        | CBX1        | 1493.766523 | 2038.858619 | 1311.31072  |
| 1378.948685 |             |             |             |             |
| SLC35F2     | SLC35F2     | 4707.343735 | 3627.865445 | 3342.950289 |
| 3204.14321  |             |             |             |             |
| SLC37A1     | SLC37A1     | 161.4601192 | 468.3388538 | 1140.706519 |
| 745.3776674 |             |             |             |             |
| AGAP5       | AGAP5       | 71.87579502 | 90.67462772 | 126.0017954 |
| 76.49928692 |             |             |             |             |
| LIPN        | LIPN        | 15.62517283 | 7.042689532 | 0           |
|             |             |             |             | 7.846080709 |
| RAD21       | RAD21       | 18890.83395 | 25354.56265 | 14553.7649  |
| 13304.0106  |             |             |             |             |
| ZBED4       | ZBED4       | 1516.683443 | 3302.141054 | 1343.647464 |

|              |              |             |             |             |
|--------------|--------------|-------------|-------------|-------------|
| 1563.331581  |              |             |             |             |
| LMNA         | LMNA         | 8302.175164 | 2685.025384 | 9554.950308 |
| 5345.142483  |              |             |             |             |
| ZNF155       | ZNF155       | 207.2939596 | 345.091787  | 304.4114172 |
| 506.0722058  |              |             |             |             |
| NPHP3-ACAD11 | NPHP3-ACAD11 |             | 896.8849205 | 907.6266134 |
| 1122.865557  |              | 1696.714953 |             |             |
| LOC653160    | LOC653160    |             | 32.29202385 | 38.73479242 |
| 33.45180409  |              | 73.55700665 |             |             |
| PRLR         | PRLR         | 3.125034566 | 0           | 14.49578177 |
| STX16        | STX16        | 4690.676884 | 5075.138144 | 3583.803278 |
| 5003.837972  |              |             |             |             |
| CREB3L3      | CREB3L3      | 270.8363291 | 29.05109432 | 23.41626286 |
| 20.59596186  |              |             |             |             |
| SKA1         | SKA1         | 4516.716626 | 4450.979784 | 2266.917257 |
| 2839.300457  |              |             |             |             |
| FUK          | FUK          | 677.0908227 | 860.9687952 | 349.0138227 |
| 833.6460754  |              |             |             |             |
| RASA2        | RASA2        | 2667.737841 | 2692.068073 | 3007.317188 |
| 3357.141784  |              |             |             |             |
| SPINK13      | SPINK13      | 1.041678189 | 4.401680957 | 0           |
| PMEL         | PMEL         | 38.54209298 | 86.27294676 | 0.980760089 |
| 76.49928692  |              |             |             | 63.55842777 |
| PVR          | PVR          | 648.9655116 | 613.5943254 | 538.5740458 |
| 495.2838448  |              |             |             |             |
| HEPACAM2     | HEPACAM2     |             | 3.125034566 | 3.521344766 |
| 1.115060136  |              | 0.980760089 |             |             |
| FABP6        | FABP6        | 0           | 0.880336191 | 0           |
| C1orf101     | C1orf101     |             | 13.54181645 | 16.72638764 |
| 14.49578177  |              | 25.49976231 |             |             |
| FRG2B        | FRG2B        | 0           | 0           | 4.903800443 |
| UNKL         | UNKL         | 789.592067  | 924.353001  | 1023.625205 |
| 1016.067452  |              |             |             |             |
| GTF3C2       | GTF3C2       | 8625.095402 | 6659.743288 | 6490.765053 |
| 7379.238907  |              |             |             |             |
| CYBRD1       | CYBRD1       | 193.7521431 | 168.1442126 | 56.86806695 |
| 149.0755335  |              |             |             |             |
| PRMT7        | PRMT7        | 3621.915062 | 2411.240828 | 2691.755169 |
| 3132.547723  |              |             |             |             |
| PAPSS1       | PAPSS1       | 5101.09809  | 3713.258055 | 3234.789455 |
| 3656.273611  |              |             |             |             |
| MMACHC       | MMACHC       | 1005.219452 | 813.4306409 | 769.391494  |
| 670.8399006  |              |             |             |             |
| MON2         | MON2         | 2617.737288 | 3291.57702  | 2923.687677 |
| 2787.320172  |              |             |             |             |
| PIK3R1       | PIK3R1       | 3150.034843 | 2771.298331 | 5024.460974 |
| 4140.769094  |              |             |             |             |
| RBMX         | RBMX         | 19558.54967 | 15415.56705 | 17875.52904 |
| 18789.40178  |              |             |             |             |
| FKBP9        | FKBP9        | 12.50013826 | 33.45277527 | 14.49578177 |

|                 |               |  |             |               |   |
|-----------------|---------------|--|-------------|---------------|---|
| 19.61520177     |               |  |             |               |   |
| LINC00526       | LINC00526     |  | 123.9597045 | 202.477324    |   |
| 227.4722678     | 217.7287397   |  |             |               |   |
| RAB33B RAB33B   | 550.0060836   |  | 608.3123083 | 1100.564354   |   |
| 735.5700665     |               |  |             |               |   |
| BCL11B BCL11B   | 488.5470705   |  | 1114.505618 | 828.4896812   |   |
| 656.1284993     |               |  |             |               |   |
| ATP13A1 ATP13A1 | 8344.88397    |  | 8066.520522 | 6350.267476   |   |
| 7838.234629     |               |  |             |               |   |
| BCL2L10 BCL2L10 | 4.166712755   |  | 2.641008574 | 17.84096218   | 0 |
| VTCN1 VTCN1     | 1.041678189   |  | 0 0         | 0.980760089   |   |
| ZBTB34 ZBTB34   | 154.1683719   |  | 323.0833823 | 333.4029807   |   |
| 239.3054616     |               |  |             |               |   |
| N4BP2L1 N4BP2L1 | 726.0496975   |  | 676.098195  | 1709.387189   |   |
| 1273.026595     |               |  |             |               |   |
| SLC22A23        | SLC22A23      |  | 43.75048393 | 75.70891246   |   |
| 168.3740806     | 162.8061747   |  |             |               |   |
| PSMG3 PSMG3     | 1722.935724   |  | 1631.262963 | 1370.408907   |   |
| 1603.542745     |               |  |             |               |   |
| ALS2 ALS2       | 943.760439    |  | 1007.104603 | 987.9432807   |   |
| 1189.661988     |               |  |             |               |   |
| CCNJ CCNJ       | 697.9243864   |  | 637.3634026 | 655.6553601   |   |
| 648.2824186     |               |  |             |               |   |
| ZNF280A ZNF280A | 2.083356377   |  | 0 0         | 0             |   |
| FAM204A FAM204A | 2440.651996   |  | 2121.610221 | 2712.941312   |   |
| 2149.826114     |               |  |             |               |   |
| SCRN2 SCRN2     | 868.7596094   |  | 1198.137557 | 667.9210216   |   |
| 1560.389301     |               |  |             |               |   |
| MND1 MND1       | 773.9668942   |  | 728.0380303 | 499.546941    |   |
| 643.3786182     |               |  |             |               |   |
| ATP8B1 ATP8B1   | 43.75048393   |  | 78.34992104 | 97.01023186   |   |
| 95.1337286      |               |  |             |               |   |
| ZDHHC9 ZDHHC9   | 635.4236951   |  | 510.594991  | 690.2222243   |   |
| 771.8581898     |               |  |             |               |   |
| C9orf43 C9orf43 | 55.208944     |  | 23.76907717 | 92.54999131   |   |
| 22.55748204     |               |  |             |               |   |
| GCSAM GCSAM     | 239.5859834   |  | 501.7916291 | 1275.628796   |   |
| 815.0116337     |               |  |             |               |   |
| HFM1 HFM1       | 0 0.880336191 |  | 0           | 1.961520177   |   |
| TRIM41 TRIM41   | 97.91774974   |  | 220.9643841 | 82.51445008   |   |
| 106.9028497     |               |  |             |               |   |
| ZNF564 ZNF564   | 844.801011    |  | 784.3795466 | 1827.583563   |   |
| 1253.411393     |               |  |             |               |   |
| DENND5B DENND5B | 7.291747321   |  | 21.12806859 | 0 24.51900222 |   |
| ZNF470 ZNF470   | 209.3773159   |  | 183.990264  | 611.0529547   |   |
| 423.6883583     |               |  |             |               |   |
| CD79B CD79B     | 2090.648125   |  | 1309.059917 | 900.9685901   |   |
| 1325.00688      |               |  |             |               |   |
| SMIM1 SMIM1     | 3.125034566   |  | 8.803361914 | 4.460240545   |   |
| 15.69216142     |               |  |             |               |   |

|             |          |             |             |             |             |
|-------------|----------|-------------|-------------|-------------|-------------|
| CCDC85B     | CCDC85B  | 2727.113498 | 2317.044856 | 2099.658237 |             |
| 2549.976231 |          |             |             |             |             |
| DTX4        | DTX4     | 0           | 6.16235334  | 20.07108245 | 11.76912106 |
| NR2C2       | NR2C2    | 1209.388377 | 2283.592081 | 2030.524508 |             |
| 1853.636568 |          |             |             |             |             |
| RAB3IL1     | RAB3IL1  | 0           | 0           | 4.460240545 | 2.942280266 |
| UROD        | UROD     | 4782.344564 | 3821.539407 | 4469.161026 |             |
| 5357.892364 |          |             |             |             |             |
| EPB41       | EPB41    | 2016.688973 | 5668.484737 | 4582.89716  |             |
| 4027.981684 |          |             |             |             |             |
| LBX2        | LBX2     | 22.91692015 | 31.69210289 | 1.115060136 |             |
| 12.74988115 |          |             |             |             |             |
| STIM1       | STIM1    | 1943.7715   | 4868.259139 | 1958.045599 |             |
| 2435.2273   |          |             |             |             |             |
| ROR2        | ROR2     | 89.58432423 | 233.2890907 | 0           | 52.96104479 |
| NRTN        | NRTN     | 5.208390943 | 11.44437049 | 12.2656615  |             |
| 34.3266031  |          |             |             |             |             |
| GANAB       | GANAB    | 16093.92802 | 21339.34928 | 13159.93973 |             |
| 14824.18874 |          |             |             |             |             |
| NBPF20      | NBPF20   | 50.00055306 | 79.23025723 | 160.5686596 |             |
| 103.9605694 |          |             |             |             |             |
| ZNF890P     | ZNF890P  | 3.125034566 | 19.36739621 | 0           | 18.63444168 |
| APOL1       | APOL1    | 4187.546319 | 2626.042859 | 6234.301222 |             |
| 3959.328478 |          |             |             |             |             |
| ZAR1L       | ZAR1L    | 0           | 2.641008574 | 0           | 0           |
| RAD21L1     | RAD21L1  | 0           | 5.282017149 | 25.64638313 | 0           |
| ACOXL       | ACOXL    | 38.54209298 | 24.64941336 | 88.08975076 |             |
| 25.49976231 |          |             |             |             |             |
| SARS2       | SARS2    | 2119.815114 | 1868.073398 | 1123.980617 |             |
| 1516.255097 |          |             |             |             |             |
| KAT6B       | KAT6B    | 1241.680401 | 1614.536575 | 2690.640109 |             |
| 2017.423502 |          |             |             |             |             |
| CRKL        | CRKL     | 8384.467741 | 8524.295342 | 8843.541941 |             |
| 8467.882606 |          |             |             |             |             |
| CRK         | CRK      | 2176.065736 | 1834.620623 | 2522.266028 |             |
| 2331.266731 |          |             |             |             |             |
| HSPA1A      | HSPA1A   | 0           | 264.1008574 | 0           | 276.574345  |
| PSG6        | PSG6     | 0           | 0           | 5.575300681 | 0           |
| SYNJ1       | SYNJ1    | 843.7593328 | 1457.836733 | 1293.469758 |             |
| 801.2809924 |          |             |             |             |             |
| CXADR       | CXADR    | 72.91747321 | 75.70891246 | 82.51445008 |             |
| 54.92256497 |          |             |             |             |             |
| TMEM191C    | TMEM191C | 0           | 3.521344766 | 14.49578177 |             |
| 6.865320621 |          |             |             |             |             |
| CLASP1      | CLASP1   | 2627.112392 | 5464.24674  | 3269.35632  |             |
| 3347.334183 |          |             |             |             |             |
| CRABP2      | CRABP2   | 4.166712755 | 8.803361914 | 5.575300681 |             |
| 12.74988115 |          |             |             |             |             |
| FGFBP2      | FGFBP2   | 15.62517283 | 115.3240411 | 60.21324736 |             |
| 84.34536763 |          |             |             |             |             |

|           |           |             |             |             |             |
|-----------|-----------|-------------|-------------|-------------|-------------|
| ABCG5     | ABCG5     | 0           | 1.760672383 | 6.690360818 | 2.942280266 |
| HINT3     | HINT3     | 1233.346975 | 922.5923286 | 1693.776347 |             |
|           |           | 1326.9684   |             |             |             |
| VWA3A     | VWA3A     | 0           | 4.401680957 | 12.2656615  | 1.961520177 |
| DIP2B     | DIP2B     | 1718.769011 | 3948.307819 | 2711.826251 |             |
|           |           | 3359.103304 |             |             |             |
| ABHD8     | ABHD8     | 509.3806343 | 922.5923286 | 477.2457383 |             |
|           |           | 685.551302  |             |             |             |
| ATP13A3   | ATP13A3   | 5424.018329 | 10043.75561 | 3791.204463 |             |
|           |           | 4110.365532 |             |             |             |
| WFDC12    | WFDC12    | 0           | 0           | 2.230120273 | 0           |
| SPSB4     | SPSB4     | 2.083356377 | 0           | 0           | 0           |
| CCNO      | CCNO      | 6.250069132 | 7.923025723 | 5.575300681 |             |
|           |           | 7.846080709 |             |             |             |
| MST1      | MST1      | 20.83356377 | 44.01680957 | 64.6734879  |             |
|           |           | 70.61472638 |             |             |             |
| UBR5      | UBR5      | 1598.97602  | 5244.162692 | 2806.606363 |             |
|           |           | 2560.764592 |             |             |             |
| SNORA26   | SNORA26   | 19.79188559 | 7.923025723 | 34.56686422 |             |
|           |           | 36.28812328 |             |             |             |
| KCNH2     | KCNH2     | 14.58349464 | 47.53815434 | 7.805420954 |             |
|           |           | 16.67292151 |             |             |             |
| HYAL2     | HYAL2     | 1172.92964  | 922.5923286 | 769.391494  |             |
|           |           | 1061.182416 |             |             |             |
| LIN54     | LIN54     | 1945.854856 | 2599.632773 | 2603.665418 |             |
|           |           | 2198.864119 |             |             |             |
| PRSS37    | PRSS37    | 1.041678189 | 0           | 10.03554123 | 0           |
| ESRRA     | ESRRA     | 4274.005608 | 3331.192148 | 4539.409815 |             |
|           |           | 3878.906151 |             |             |             |
| PARP6     | PARP6     | 1385.431991 | 1329.307649 | 3263.781019 |             |
|           |           | 2103.73039  |             |             |             |
| CSNK2A1   | CSNK2A1   | 8195.923989 | 6736.332537 | 6616.766849 |             |
|           |           | 7083.04936  |             |             |             |
| MIPEPP3   | MIPEPP3   | 368.7540788 | 356.5361575 | 309.9867179 |             |
|           |           | 303.0548674 |             |             |             |
| HTATSF1P2 | HTATSF1P2 |             | 541.6726581 | 230.6480822 |             |
|           |           | 327.8276801 | 242.2477419 |             |             |
| BBS4      | BBS4      | 1412.515624 | 954.2844315 | 1322.461322 |             |
|           |           | 1231.834671 |             |             |             |
| RHPN1-AS1 | RHPN1-AS1 |             | 27.08363291 | 22.00840479 |             |
|           |           | 70.24878858 | 31.38432284 |             |             |
| HEBP2     | HEBP2     | 2675.029589 | 2993.143051 | 1797.47694  |             |
|           |           | 2233.190722 |             |             |             |
| SLC18A2   | SLC18A2   | 100.0011061 | 101.238662  | 123.7716751 |             |
|           |           | 77.480047   |             |             |             |
| RCN1      | RCN1      | 1939.604787 | 1598.690524 | 2129.76486  |             |
|           |           | 1957.597137 |             |             |             |
| SDHB      | SDHB      | 11962.63232 | 8923.967973 | 9063.208788 |             |
|           |           | 9172.068349 |             |             |             |
| PIAS3     | PIAS3     | 1726.060759 | 2040.619292 | 2327.130504 |             |

|             |             |             |             |               |
|-------------|-------------|-------------|-------------|---------------|
| 2444.054141 |             |             |             |               |
| RASA1       | RASA1       | 2148.982103 | 2598.752437 | 2099.658237   |
| 1865.405689 |             |             |             |               |
| ZNF491      | ZNF491      | 6.250069132 | 16.72638764 | 5.575300681   |
| 36.28812328 |             |             |             |               |
| HERC4       | HERC4       | 2501.069331 | 2405.958811 | 2667.223846   |
| 2842.242737 |             |             |             |               |
| NCF4        | NCF4        | 4032.336268 | 3302.141054 | 1311.31072    |
| 1711.426355 |             |             |             |               |
| ISY1        | ISY1        | 5429.226719 | 4391.116923 | 4384.416456   |
| 4141.749854 |             |             |             |               |
| PIPOX       | PIPOX       | 1.041678189 | 16.72638764 | 45.71746559   |
| 33.34584301 |             |             |             |               |
| TTC9        | TTC9        | 678.1325008 | 359.1771661 | 1082.723392   |
| 435.4574794 |             |             |             |               |
| NANS        | NANS        | 4694.843596 | 3678.044608 | 2649.382884   |
| 2795.166253 |             |             |             |               |
| CDAN1       | CDAN1       | 1242.722079 | 1796.766167 | 1289.009518   |
| 1470.159373 |             |             |             |               |
| GIMAP8      | GIMAP8      | 2290.650337 | 2817.956149 | 3032.963571   |
| 2614.706396 |             |             |             |               |
| SIGLEC12    | SIGLEC12    |             | 3.125034566 | 0 3.345180409 |
| 0           |             |             |             |               |
| ZCWPW1      | ZCWPW1      | 89.58432423 | 62.50386959 | 458.289716    |
| 241.2669818 |             |             |             |               |
| PRUNE       | PRUNE       | 2484.40248  | 2008.927189 | 3530.280391   |
| 2491.130625 |             |             |             |               |
| C10TNF6     | C10TNF6     | 35.41705842 | 55.46118006 | 46.83252572   |
| 63.74940576 |             |             |             |               |
| C19orf12    | C19orf12    |             | 3034.408564 | 3066.210955   |
| 2368.387729 | 2445.034901 |             |             |               |
| C18orf21    | C18orf21    |             | 698.9660646 | 634.722394    |
| 650.0800594 | 535.4950084 |             |             |               |
| DDX55       | DDX55       | 2600.028759 | 1948.183992 | 2654.958184   |
| 2582.341313 |             |             |             |               |
| ZNFX1       | ZNFX1       | 11702.21277 | 9028.727979 | 20459.12338   |
| 12410.53816 |             |             |             |               |
| CCDC69      | CCDC69      | 6515.69707  | 8043.631781 | 6549.86324    |
| 6577.957915 |             |             |             |               |
| PRPF31      | PRPF31      | 9832.400423 | 6864.861621 | 6949.054769   |
| 7628.35197  |             |             |             |               |
| LDLRAP1     | LDLRAP1     | 1802.103266 | 1858.3897   | 3791.204463   |
| 2814.781454 |             |             |             |               |
| LRMP        | LRMP        | 985.4275665 | 2487.830077 | 1906.752833   |
| 2537.226349 |             |             |             |               |
| PRDM10      | PRDM10      | 640.632086  | 767.6531589 | 831.8348617   |
| 764.9928692 |             |             |             |               |
| TMEM206     | TMEM206     | 1413.557302 | 841.601399  | 1037.005927   |
| 888.5686403 |             |             |             |               |
| SPATA17     | SPATA17     | 2.083356377 | 0 0         | 1.961520177   |

|             |             |             |             |             |             |
|-------------|-------------|-------------|-------------|-------------|-------------|
| ZNF701      | ZNF701      | 915.6351279 | 958.6861125 | 1140.706519 |             |
| 1226.930871 |             |             |             |             |             |
| WDR12       | WDR12       | 5100.056412 | 3402.49938  | 4638.650167 |             |
| 4663.514222 |             |             |             |             |             |
| GINM1       | GINM1       | 1369.806818 | 1270.325124 | 1523.172146 |             |
| 1350.506642 |             |             |             |             |             |
| NHLRC2      | NHLRC2      | 1493.766523 | 1455.195724 | 1154.087241 |             |
| 1027.836573 |             |             |             |             |             |
| ACSF3       | ACSF3       | 1931.271362 | 2210.524177 | 1786.326338 |             |
| 2256.728964 |             |             |             |             |             |
| SETBP1      | SETBP1      | 79.16754234 | 157.5801783 | 20.07108245 |             |
| 108.8643698 |             |             |             |             |             |
| KLC1        | KLC1        | 6563.614267 | 5960.756352 | 5575.300681 |             |
| 5795.311364 |             |             |             |             |             |
| ATP5S       | ATP5S       | 209.3773159 | 423.4417081 | 266.4993726 |             |
| 310.9009481 |             |             |             |             |             |
| GBA         | GBA         | 4225.046733 | 3299.500046 | 2521.150968 |             |
| 2716.705446 |             |             |             |             |             |
| H00K3       | H00K3       | 1987.521984 | 2404.198139 | 1825.353443 |             |
| 1891.886211 |             |             |             |             |             |
| CHMP4B      | CHMP4B      | 181.2520048 | 389.1085966 | 236.3927489 |             |
| 238.3247015 |             |             |             |             |             |
| MOCS2       | MOCS2       | 2259.399991 | 2110.165851 | 1962.50584  |             |
| 1823.233005 |             |             |             |             |             |
| LOXL3       | LOXL3       | 1583.350847 | 1542.349007 | 1174.158323 |             |
| 1299.507117 |             |             |             |             |             |
| MBNL1-AS1   | MBNL1-AS1   |             | 586.4648202 | 706.9099617 |             |
| 870.8619664 | 764.9928692 |             |             |             |             |
| LINC01433   | LINC01433   |             | 3.125034566 | 0           | 0           |
| 3.923040355 |             |             |             |             |             |
| TMX2        | TMX2        | 10196.98779 | 6179.079728 | 9621.853916 |             |
| 8269.769068 |             |             |             |             |             |
| BCL7A       | BCL7A       | 103.1261407 | 439.2877595 | 120.4264947 |             |
| 260.8821836 |             |             |             |             |             |
| SIRT1       | SIRT1       | 2185.44084  | 1872.475079 | 2734.127454 |             |
| 1751.637518 |             |             |             |             |             |
| TTK         | TTK         | 4979.221742 | 4423.689362 | 2389.573872 |             |
| 3514.063398 |             |             |             |             |             |
| KCNJ13      | KCNJ13      | 26.04195472 | 35.21344766 | 31.22168382 |             |
| 32.36508293 |             |             |             |             |             |
| PXMP4       | PXMP4       | 1194.804882 | 1102.180912 | 675.7264426 |             |
| 753.2237481 |             |             |             |             |             |
| RRH         | RRH         | 10.41678189 | 1.760672383 | 2.230120273 | 0           |
| ISL1        | ISL1        | 0           | 7.042689532 | 0           | 0.980760089 |
| WFDC2       | WFDC2       | 19.79188559 | 18.48706002 | 2.230120273 |             |
| 0.980760089 |             |             |             |             |             |
| LASP1       | LASP1       | 6872.992689 | 12740.22536 | 6078.192803 |             |
| 7279.201378 |             |             |             |             |             |
| CRHR1-IT1   | CRHR1-IT1   |             | 62.50069132 | 25.52974955 |             |
| 74.70902913 | 39.23040355 |             |             |             |             |



|                 |               |               |             |   |
|-----------------|---------------|---------------|-------------|---|
| SMC5-AS1        | SMC5-AS1      | 15.62517283   | 23.76907717 |   |
| 41.25722504     | 28.44204257   |               |             |   |
| TNFRSF8 TNFRSF8 | 2069.814561   | 2281.831408   | 2503.310006 |   |
| 3829.868146     |               |               |             |   |
| MIR210 MIR210   | 0 4.401680957 | 0             | 0           |   |
| C1QTNF8 C1QTNF8 | 4.166712755   | 3.521344766   | 5.575300681 |   |
| 1.961520177     |               |               |             |   |
| JMJD1C JMJD1C   | 2426.068501   | 3347.0382     | 4165.864669 |   |
| 3539.56316      |               |               |             |   |
| RPL23AP82       | RPL23AP82     | 488.5470705   | 326.604727  |   |
| 628.8939169     | 537.4565286   |               |             |   |
| FBX05 FBX05     | 4711.510447   | 4457.142137   | 2071.781733 |   |
| 2460.727062     |               |               |             |   |
| THAP5 THAP5     | 428.1297356   | 1378.606476   | 721.4439082 |   |
| 1247.526833     |               |               |             |   |
| C16orf95        | C16orf95      | 282.2947891   | 441.9287681 |   |
| 127.1168555     | 306.9779078   |               |             |   |
| REV3L REV3L     | 1738.560897   | 1821.41558    | 2356.122068 |   |
| 1850.694287     |               |               |             |   |
| MANBAL MANBAL   | 914.5934497   | 805.5076152   | 1090.528813 |   |
| 907.203082      |               |               |             |   |
| NDP NDP         | 1.041678189   | 0 10.03554123 | 0           |   |
| SLC17A2 SLC17A2 | 0 0           | 0 9.807600887 |             |   |
| CUBN CUBN       | 15.62517283   | 18.48706002   | 25.64638313 |   |
| 4.903800443     |               |               |             |   |
| RPS11 RPS11     | 11213.6657    | 13543.09197   | 14496.89683 |   |
| 12991.14813     |               |               |             |   |
| ANKH ANKH       | 2665.654485   | 3709.736711   | 2735.242514 |   |
| 3779.849382     |               |               |             |   |
| FOXD4L1 FOXD4L1 | 0 3.521344766 | 0             | 0.980760089 |   |
| FOXB1 FOXB1     | 41.66712755   | 198.9559793   | 2.230120273 |   |
| 42.17268381     |               |               |             |   |
| RNF115 RNF115   | 2244.816497   | 1941.141302   | 2299.254001 |   |
| 1882.07861      |               |               |             |   |
| CDC42BPA        | CDC42BPA      | 42.70880574   | 141.7341268 |   |
| 37.91204463     | 45.11496408   |               |             |   |
| LOC388553       | LOC388553     | 0 2.641008574 | 0           | 0 |
| S0CS2-AS1       | S0CS2-AS1     | 35.41705842   | 11.44437049 |   |
| 37.91204463     | 10.78836098   |               |             |   |
| MIR210HG        | MIR210HG      | 13.54181645   | 100.3583258 |   |
| 85.85963049     | 253.0361029   |               |             |   |
| NSFL1C NSFL1C   | 5053.180893   | 3043.322214   | 5051.222417 |   |
| 3872.04083      |               |               |             |   |
| MRPL42 MRPL42   | 8295.925095   | 6236.30158    | 6375.913859 |   |
| 5694.293075     |               |               |             |   |
| ZNF343 ZNF343   | 882.3014258   | 738.6020646   | 970.1023186 |   |
| 756.1660284     |               |               |             |   |
| AKR1C3 AKR1C3   | 393.7543553   | 573.0988606   | 103.7005927 |   |
| 185.3636568     |               |               |             |   |
| TMEM89 TMEM89   | 1.041678189   | 0.880336191   | 1.115060136 | 0 |

|                 |             |             |             |   |
|-----------------|-------------|-------------|-------------|---|
| ANKZF1 ANKZF1   | 3021.908425 | 3155.12491  | 2951.564181 |   |
| 4720.398307     |             |             |             |   |
| TMEM120B        | TMEM120B    | 7452.165762 | 7158.013573 |   |
| 6795.17647      | 8728.764789 |             |             |   |
| LAMA2 LAMA2     | 44.79216211 | 57.22185244 | 36.7969845  |   |
| 53.94180488     |             |             |             |   |
| SPATA2 SPATA2   | 1636.476434 | 1579.323127 | 1338.072164 |   |
| 1379.929445     |             |             |             |   |
| GATB GATB       | 2153.148816 | 1677.040445 | 1551.04865  |   |
| 1977.212339     |             |             |             |   |
| SLC38A10        | SLC38A10    | 6315.694858 | 6661.503961 |   |
| 4575.091739     | 5950.271458 |             |             |   |
| GPR89A GPR89A   | 717.716272  | 574.859533  | 714.7535473 |   |
| 589.4368133     |             |             |             |   |
| NFKBIE NFKBIE   | 3671.915615 | 2213.165185 | 2536.76181  |   |
| 2972.683829     |             |             |             |   |
| TP53BP1 TP53BP1 | 3014.616678 | 4137.5801   | 2890.235873 |   |
| 3869.09855      |             |             |             |   |
| NOC2L NOC2L     | 13223.06293 | 7756.642183 | 10104.67495 |   |
| 10087.11751     |             |             |             |   |
| MLLT6 MLLT6     | 590.631533  | 1552.032706 | 1097.219174 |   |
| 880.7225596     |             |             |             |   |
| DHRS11 DHRS11   | 613.5484531 | 420.8006995 | 422.6077916 |   |
| 520.7836071     |             |             |             |   |
| TNFRSF6B        | TNFRSF6B    | 13.54181645 | 22.88874098 |   |
| 6.690360818     | 27.46128248 |             |             |   |
| NR5A2 NR5A2     | 53.12558762 | 191.0329535 | 2.230120273 |   |
| 56.88408514     |             |             |             |   |
| RIPK2 RIPK2     | 377.0875043 | 288.7502708 | 2483.238923 |   |
| 950.3565259     |             |             |             |   |
| CDS2 CDS2       | 6002.149723 | 4781.986192 | 5537.388637 |   |
| 4797.878354     |             |             |             |   |
| TMEM238 TMEM238 | 27.08363291 | 61.6235334  | 15.61084191 |   |
| 37.26888337     |             |             |             |   |
| PCID2 PCID2     | 6139.651244 | 5020.5573   | 4269.565262 |   |
| 4791.993793     |             |             |             |   |
| BNIP3L BNIP3L   | 1835.436968 | 3258.124245 | 3991.915288 |   |
| 6023.828465     |             |             |             |   |
| PIK3C3 PIK3C3   | 2586.486943 | 2005.405844 | 2678.374447 |   |
| 2649.032999     |             |             |             |   |
| RAB31 RAB31     | 356.2539405 | 285.228926  | 99.24035213 |   |
| 101.9990492     |             |             |             |   |
| FAN1 FAN1       | 1167.72125  | 1313.461598 | 1850.999826 |   |
| 1884.04013      |             |             |             |   |
| SRP19 SRP19     | 5944.857423 | 4796.951907 | 5053.452538 |   |
| 4202.55698      |             |             |             |   |
| MIR6865 MIR6865 | 3.125034566 | 4.401680957 | 1.115060136 | 0 |
| PAOX PAOX       | 222.9191324 | 202.477324  | 249.7734705 |   |
| 400.1501162     |             |             |             |   |
| PLEKHA3 PLEKHA3 | 1395.848773 | 1465.759759 | 2052.825711 |   |

|              |              |             |   |             |             |             |
|--------------|--------------|-------------|---|-------------|-------------|-------------|
| 1409.352247  |              |             |   |             |             |             |
| NDUFC2       | NDUFC2       | 8703.221267 |   | 7854.3595   |             | 5372.359737 |
| 5450.083813  |              |             |   |             |             |             |
| OR1G1        | OR1G1        | 0           | 0 | 0           | 4.903800443 |             |
| HEY2         | HEY2         | 0           | 0 | 45.71746559 |             | 6.865320621 |
| HEY1         | HEY1         | 53.12558762 |   | 11.44437049 |             | 12.2656615  |
| 6.865320621  |              |             |   |             |             |             |
| ANKRD39      | ANKRD39      | 3128.159601 |   | 1887.440794 |             | 1188.654105 |
| 1392.679326  |              |             |   |             |             |             |
| OVOL3        | OVOL3        | 4.166712755 |   | 19.36739621 |             | 16.72590204 |
| 10.78836098  |              |             |   |             |             |             |
| DRICH1       | DRICH1       | 4.166712755 |   | 7.923025723 |             | 5.575300681 |
| 10.78836098  |              |             |   |             |             |             |
| EVA1C        | EVA1C        | 76.04250777 |   | 125.0077392 |             | 274.3047935 |
| 268.7282643  |              |             |   |             |             |             |
| RDH13        | RDH13        | 1210.430055 |   | 773.8155123 |             | 1033.660746 |
| 1124.931822  |              |             |   |             |             |             |
| TMEM38B      | TMEM38B      | 1342.723185 |   | 796.7042533 |             | 2052.825711 |
| 1399.544647  |              |             |   |             |             |             |
| SHKBP1       | SHKBP1       | 9954.276771 |   | 10217.18184 |             | 6146.211471 |
| 8152.077857  |              |             |   |             |             |             |
| DCBLD2       | DCBLD2       | 172.9185793 |   | 272.0238832 |             | 275.4198537 |
| 126.5180514  |              |             |   |             |             |             |
| MRPL52       | MRPL52       | 3796.916998 |   | 3562.720567 |             | 2838.943107 |
| 2763.78193   |              |             |   |             |             |             |
| GPR62        | GPR62        | 3.125034566 |   | 9.683698106 |             | 1.115060136 |
| 13.73064124  |              |             |   |             |             |             |
| RLN3         | RLN3         | 2.083356377 |   | 0           | 7.805420954 | 10.78836098 |
| ASB16        | ASB16        | 267.7112945 |   | 311.6390118 |             | 201.8258847 |
| 330.5161499  |              |             |   |             |             |             |
| UPK3A        | UPK3A        | 2.083356377 |   | 0           | 0           | 0           |
| UPK1B        | UPK1B        | 2.083356377 |   | 2.641008574 |             | 5.575300681 |
| 7.846080709  |              |             |   |             |             |             |
| FAF1         | FAF1         | 4355.256507 |   | 3839.146131 |             | 3633.980984 |
| 4159.403536  |              |             |   |             |             |             |
| SNORD116-28  | SNORD116-28  |             |   | 0           | 0.880336191 | 0           |
| SNORD116-29  | SNORD116-29  |             |   | 0           | 0           | 1.115060136 |
| ADAP1        | ADAP1        | 711.4662029 |   | 715.7133236 |             | 781.6571555 |
| 1119.047261  |              |             |   |             |             |             |
| LOC100240735 | LOC100240735 |             |   | 38.54209298 |             | 43.13647338 |
| 36.7969845   | 20.59596186  |             |   |             |             |             |
| AP4B1-AS1    | AP4B1-AS1    |             |   | 1333.348082 |             | 1220.145961 |
| 1048.156528  | 1307.353198  |             |   |             |             |             |
| KDM3A        | KDM3A        | 2618.778966 |   | 2970.25431  |             | 4811.484488 |
| 4668.418022  |              |             |   |             |             |             |
| TRIM17       | TRIM17       | 11.45846008 |   | 27.29042193 |             | 25.64638313 |
| 12.74988115  |              |             |   |             |             |             |
| NCOA3        | NCOA3        | 13598.06708 |   | 15598.67698 |             | 14713.2185  |
| 11791.67855  |              |             |   |             |             |             |
| SNAPIN       | SNAPIN       | 4328.172874 |   | 3075.894653 |             | 3326.224386 |

|             |             |             |             |             |
|-------------|-------------|-------------|-------------|-------------|
| 3169.816607 |             |             |             |             |
| ZC3H3       | ZC3H3       | 1535.43365  | 2058.226016 | 1620.182378 |
| 1589.812104 |             |             |             |             |
| DCTN6       | DCTN6       | 2346.900959 | 2233.412918 | 2433.061217 |
| 2224.363881 |             |             |             |             |
| DCUN1D4     | DCUN1D4     | 1440.640935 | 1474.563121 | 2076.241974 |
| 1761.445119 |             |             |             |             |
| RITA1       | RITA1       | 2889.615295 | 2224.609556 | 2131.994981 |
| 2450.919462 |             |             |             |             |
| PTPN11      | PTPN11      | 8278.216566 | 10203.97679 | 5577.530802 |
| 7611.679048 |             |             |             |             |
| TSLP        | TSLP        | 2.083356377 | 14.96571525 | 24.531323   |
| 6.865320621 |             |             |             |             |
| GOLGA2P10   | GOLGA2P10   |             | 2.083356377 | 0.880336191 |
| 3.345180409 | 0.980760089 |             |             |             |
| ALDH1L1-AS2 | ALDH1L1-AS2 |             | 0           | 0           |
| ACCS        | ACCS        | 207.2939596 | 333.6474166 | 201.8258847 |
| 281.4781454 |             |             |             |             |
| ACP5        | ACP5        | 344.7954805 | 788.7812275 | 273.1897334 |
| 283.4396656 |             |             |             |             |
| KARS        | KARS        | 26306.54098 | 17562.70702 | 25006.33862 |
| 21874.87302 |             |             |             |             |
| POLR2D      | POLR2D      | 6282.361156 | 4879.703509 | 5379.050097 |
| 5398.103528 |             |             |             |             |
| SOCS3       | SOCS3       | 2923.990676 | 6531.214204 | 5691.266935 |
| 7096.780002 |             |             |             |             |
| CAPN5       | CAPN5       | 35.41705842 | 33.45277527 | 57.98312709 |
| 66.69168603 |             |             |             |             |
| ANXA3       | ANXA3       | 264.5862599 | 66.02521436 | 46.83252572 |
| 13.73064124 |             |             |             |             |
| SLAMF1      | SLAMF1      | 8755.305176 | 6046.148963 | 5048.992297 |
| 6954.569789 |             |             |             |             |
| CDKN1B      | CDKN1B      | 252.0861217 | 746.5250903 | 420.3776714 |
| 241.2669818 |             |             |             |             |
| BEST1       | BEST1       | 185.4187176 | 100.3583258 | 139.382517  |
| 73.55700665 |             |             |             |             |
| CA8         | CA8         | 38.54209298 | 11.44437049 | 3.345180409 |
| 12.74988115 |             |             |             |             |
| XRCC6BP1    | XRCC6BP1    |             | 859.3845057 | 958.6861125 |
| 715.8686075 | 746.3584275 |             |             |             |
| XP06        | XP06        | 2223.982933 | 6257.429649 | 4509.303191 |
| 3798.483823 |             |             |             |             |
| PDLIM2      | PDLIM2      | 1984.396949 | 1092.497214 | 1401.630591 |
| 2039.000224 |             |             |             |             |
| SS18L2      | SS18L2      | 3663.58219  | 3815.377054 | 3868.143613 |
| 3399.314467 |             |             |             |             |
| GPR15       | GPR15       | 4404.215382 | 2582.906386 | 1150.742061 |
| 800.3002324 |             |             |             |             |
| GPR3        | GPR3        | 66.66740408 | 22.00840479 | 53.52288654 |
| 85.32612771 |             |             |             |             |

|              |              |             |             |             |             |
|--------------|--------------|-------------|-------------|-------------|-------------|
| SLC39A6      | SLC39A6      | 5131.306758 | 5392.939509 | 5686.806695 |             |
| 5566.794263  |              |             |             |             |             |
| GLUD1        | GLUD1        | 14269.94951 | 12162.72482 | 10948.77548 |             |
| 12161.4251   |              |             |             |             |             |
| INSRR        | INSRR        | 5.208390943 | 0.880336191 | 0           | 10.78836098 |
| ZBTB40       | ZBTB40       | 1015.636234 | 1706.971875 | 1842.079345 |             |
| 1558.427781  |              |             |             |             |             |
| SH3BP5       | SH3BP5       | 4796.928059 | 5343.640682 | 1817.548022 |             |
| 2161.595235  |              |             |             |             |             |
| MCM2         | MCM2         | 28340.93848 | 27142.52545 | 16331.17076 |             |
| 24455.25281  |              |             |             |             |             |
| LOC100507250 | LOC100507250 |             | 63.54236951 | 39.61512861 |             |
| 56.86806695  | 55.90332505  |             |             |             |             |
| LOC642361    | LOC642361    |             | 260.4195472 | 230.6480822 |             |
| 220.781907   | 183.4021366  |             |             |             |             |
| LOC493754    | LOC493754    |             | 955.218899  | 838.0800542 |             |
| 1203.149887  | 1153.373864  |             |             |             |             |
| LOC100287010 | LOC100287010 |             | 0           | 0.880336191 | 0           |
| HYAL3        | HYAL3        | 965.6356809 | 581.0218863 | 521.8481438 | 0           |
| 575.706172   |              |             |             |             |             |
| C6orf203     | C6orf203     |             | 891.6765295 | 576.6202054 |             |
| 896.5083496  | 749.3007077  |             |             |             |             |
| IGFALS       | IGFALS       | 4.166712755 | 5.282017149 | 2.230120273 | 0           |
| ABCB10       | ABCB10       | 4722.968908 | 4021.375722 | 3232.559335 |             |
| 2883.434661  |              |             |             |             |             |
| IQCC         | IQCC         | 441.671552  | 386.467588  | 405.8818896 |             |
| 364.842753   |              |             |             |             |             |
| SNORD88A     | SNORD88A     |             | 1.041678189 | 4.401680957 | 0           |
| 1.961520177  |              |             |             |             |             |
| CTIF         | CTIF         | 5.208390943 | 21.12806859 | 3.345180409 |             |
| 17.6536816   |              |             |             |             |             |
| LY75-CD302   | LY75-CD302   |             | 2009.397226 | 2643.649583 |             |
| 4518.223672  | 4252.575744  |             |             |             |             |
| HBS1L        | HBS1L        | 12283.4692  | 13625.84357 | 8069.690206 |             |
| 10667.72748  |              |             |             |             |             |
| ZNF697       | ZNF697       | 1.041678189 | 1.760672383 | 0           | 11.76912106 |
| FOLR2        | FOLR2        | 0           | 0.880336191 | 0           | 1.961520177 |
| NDUFS3       | NDUFS3       | 4261.50547  | 3769.599572 | 2853.438889 |             |
| 2849.108058  |              |             |             |             |             |
| NDUFS2       | NDUFS2       | 18043.94958 | 10641.50388 | 11310.05496 |             |
| 11715.17926  |              |             |             |             |             |
| CDC42EP2     | CDC42EP2     |             | 89.58432423 | 55.46118006 |             |
| 138.2674569  | 95.1337286   |             |             |             |             |
| WNT11        | WNT11        | 2.083356377 | 0           | 1.115060136 | 26.48052239 |
| SKI          | SKI          | 59.37565676 | 151.4178249 | 46.83252572 |             |
| 52.96104479  |              |             |             |             |             |
| RBL2         | RBL2         | 11719.9213  | 12236.67306 | 12070.52598 |             |
| 12965.64837  |              |             |             |             |             |
| GSTP1        | GSTP1        | 23805.47165 | 16038.84507 | 15478.14975 |             |
| 13346.18329  |              |             |             |             |             |

|              |              |             |             |             |
|--------------|--------------|-------------|-------------|-------------|
| BCKDK        | BCKDK        | 3775.041756 | 3429.789802 | 3039.653931 |
| 3917.155794  |              |             |             |             |
| L3MBTL3      | L3MBTL3      | 326.0452731 | 470.0995262 | 630.008977  |
| 409.9577171  |              |             |             |             |
| MAPK1IP1L    | MAPK1IP1L    |             | 12970.97681 | 13680.42441 |
| 10992.26282  |              | 12252.63579 |             |             |
| RHOG         | RHOG         | 11055.33062 | 9262.897406 | 6490.765053 |
| 8505.151489  |              |             |             |             |
| VWA5A        | VWA5A        | 1345.84822  | 1386.529502 | 934.4203942 |
| 1387.775525  |              |             |             |             |
| PTK2B        | PTK2B        | 7869.878716 | 7909.82068  | 7346.016178 |
| 6991.838672  |              |             |             |             |
| IL36RN       | IL36RN       | 0           | 0           | 5.884560532 |
| 0            |              | 0           |             |             |
| ING3         | ING3         | 2848.989846 | 2699.991099 | 1815.317902 |
| 1802.637043  |              |             |             |             |
| HOXB6        | HOXB6        | 16.66685102 | 30.8117667  | 22.30120273 |
| 13.73064124  |              |             |             |             |
| UFSP2        | UFSP2        | 1875.02074  | 1845.184657 | 2356.122068 |
| 2516.630388  |              |             |             |             |
| TMEM74B      | TMEM74B      | 2.083356377 | 10.5640343  | 4.460240545 |
| 5.884560532  |              |             |             |             |
| MIS18BP1     | MIS18BP1     |             | 3347.953698 | 3944.786474 |
| 2394.034113  |              | 2976.606869 |             |             |
| CCDC92       | CCDC92       | 1098.970489 | 1096.018558 | 1572.234792 |
| 1822.252245  |              |             |             |             |
| PROSER1      | PROSER1      | 6522.988818 | 7208.192735 | 5773.781386 |
| 5976.75198   |              |             |             |             |
| MED21        | MED21        | 2014.605617 | 2028.294585 | 2527.841329 |
| 1605.504265  |              |             |             |             |
| FAM8A1       | FAM8A1       | 515.6307034 | 846.00308   | 919.9246124 |
| 558.0524905  |              |             |             |             |
| ATP5L        | ATP5L        | 14055.3638  | 17829.44889 | 11273.25798 |
| 10854.0719   |              |             |             |             |
| CDH1         | CDH1         | 216.6690632 | 355.6558213 | 206.2861252 |
| 539.4180488  |              |             |             |             |
| RFXANK       | RFXANK       | 2888.573617 | 2873.417329 | 1803.05224  |
| 2398.939177  |              |             |             |             |
| CD7          | CD7          | 1184.388101 | 3993.204964 | 1436.197456 |
| 3737.676698  |              |             |             |             |
| WIF1         | WIF1         | 1.041678189 | 0.880336191 | 0           |
|              |              |             |             | 10.78836098 |
| VPS26B       | VPS26B       | 4312.547701 | 4418.407345 | 3306.153304 |
| 3335.565062  |              |             |             |             |
| LOC100129361 | LOC100129361 |             | 1944.813178 | 1589.887162 |
| 1891.141991  |              | 1704.561034 |             |             |
| TARS2        | TARS2        | 5028.180617 | 4090.922282 | 4092.2707   |
| 4889.089042  |              |             |             |             |
| MST01        | MST01        | 2780.239086 | 1603.092205 | 2565.753374 |
| 2801.050813  |              |             |             |             |
| C11orf71     | C11orf71     |             | 378.1291825 | 376.7838899 |
| 557.5300681  |              | 467.8225623 |             |             |

|             |             |             |             |             |             |
|-------------|-------------|-------------|-------------|-------------|-------------|
| PLEKHG5     | PLEKHG5     | 560.4228655 | 275.5452279 | 408.1120099 |             |
| 403.0923964 |             |             |             |             |             |
| KCNA6       | KCNA6       | 81.25089872 | 279.9469089 | 57.98312709 |             |
| 132.402612  |             |             |             |             |             |
| ITPR1       | ITPR1       | 2911.490537 | 4011.692024 | 2658.303365 |             |
| 2814.781454 |             |             |             |             |             |
| LINC01337   | LINC01337   |             | 12.50013826 | 5.282017149 |             |
| 11.15060136 | 5.884560532 |             |             |             |             |
| MPZL1       | MPZL1       | 2545.861493 | 2184.114091 | 1782.981158 |             |
| 2164.537516 |             |             |             |             |             |
| VAPB        | VAPB        | 2422.943467 | 2648.9316   | 2638.232282 |             |
| 2789.281692 |             |             |             |             |             |
| CEP85       | CEP85       | 3482.330185 | 3201.782728 | 2755.313597 |             |
| 2776.531811 |             |             |             |             |             |
| PLCG1-AS1   | PLCG1-AS1   |             | 446.879943  | 664.6538245 |             |
| 432.6433329 | 490.3800443 |             |             |             |             |
| RPN2        | RPN2        | 29469.07596 | 19130.58578 | 21665.61845 |             |
| 17943.98658 |             |             |             |             |             |
| RPL32       | RPL32       | 9425.104251 | 12594.96989 | 14990.86847 |             |
| 13195.14623 |             |             |             |             |             |
| ZNF814      | ZNF814      | 270.8363291 | 393.5102776 | 284.3403347 |             |
| 448.2073605 |             |             |             |             |             |
| UBE2E4P     | UBE2E4P     | 1.041678189 | 0.880336191 | 1.115060136 |             |
| 1.961520177 |             |             |             |             |             |
| GALNT9      | GALNT9      | 0           | 8.92048109  | 0           |             |
| MAST4       | MAST4       | 2563.570022 | 4035.461102 | 1566.659491 |             |
| 2141.980034 |             |             |             |             |             |
| RALY-AS1    | RALY-AS1    |             | 53.12558762 | 67.78588674 |             |
| 82.51445008 | 72.57624656 |             |             |             |             |
| LINC01251   | LINC01251   |             | 2.083356377 | 0.880336191 | 0           |
| 3.923040355 |             |             |             |             |             |
| CRNKL1      | CRNKL1      | 4006.294314 | 3257.243908 | 3461.146663 |             |
| 3090.375039 |             |             |             |             |             |
| SF3B1       | SF3B1       | 38435.84181 | 34669.39989 | 31890.7199  |             |
| 34859.15583 |             |             |             |             |             |
| SNORD103A   | SNORD103A   |             | 4.166712755 | 5.282017149 |             |
| 11.15060136 | 5.884560532 |             |             |             |             |
| KATNBL1P6   | KATNBL1P6   |             | 2.083356377 | 6.16235334  |             |
| 2.230120273 | 2.942280266 |             |             |             |             |
| ABCA1       | ABCA1       | 95.83439336 | 44.01680957 | 113.7361339 |             |
| 107.8836098 |             |             |             |             |             |
| SYNGR4      | SYNGR4      | 0           | 1.760672383 | 7.805420954 | 10.78836098 |
| MAGEH1      | MAGEH1      | 1047.928258 | 893.5412343 | 1372.639028 |             |
| 1333.833721 |             |             |             |             |             |
| MGAM        | MGAM        | 0           | 0.880336191 | 0           | 0.980760089 |
| PCDHGB2     | PCDHGB2     | 4.166712755 | 7.042689532 | 33.45180409 |             |
| 10.78836098 |             |             |             |             |             |
| TOX         | TOX         | 1018.761269 | 423.4417081 | 713.6384872 |             |
| 656.1284993 |             |             |             |             |             |
| NAGK        | NAGK        | 2888.573617 | 2120.729885 | 3616.140022 |             |

|                 |                |               |               |  |  |
|-----------------|----------------|---------------|---------------|--|--|
| 2811.839174     |                |               |               |  |  |
| KRI1 KRI1       | 3219.827281    | 3839.146131   | 3601.64424    |  |  |
| 4742.955789     |                |               |               |  |  |
| PARP14 PARP14   | 10661.57626    | 8617.610978   | 14373.12516   |  |  |
| 8313.903272     |                |               |               |  |  |
| SNORD116-15     | SNORD116-15    | 0 0           | 0 0.980760089 |  |  |
| ZNF551 ZNF551   | 778.133607     | 933.1563629   | 1077.148092   |  |  |
| 986.6446492     |                |               |               |  |  |
| ZNF721 ZNF721   | 1526.058546    | 1569.639429   | 2165.446785   |  |  |
| 2035.077184     |                |               |               |  |  |
| CHRM5 CHRM5     | 2.083356377    | 9.683698106   | 0 0           |  |  |
| DNTTIP2 DNTTIP2 | 10763.66072    | 7091.108022   | 11424.90616   |  |  |
| 10030.23343     |                |               |               |  |  |
| LOC100506682    | LOC100506682   | 0 0           | 6.690360818 0 |  |  |
| ST7-AS2 ST7-AS2 | 306.2533875    | 136.4521097   | 208.5162455   |  |  |
| 170.6522554     |                |               |               |  |  |
| LOC101927446    | LOC101927446   | 0 0.880336191 | 0 0           |  |  |
| MRPS26 MRPS26   | 3588.58136     | 2726.401185   | 3232.559335   |  |  |
| 4132.923014     |                |               |               |  |  |
| SNAI1 SNAI1     | 10.41678189    | 0 31.22168382 | 4.903800443   |  |  |
| SIX1 SIX1       | 9.375103698    | 32.57243908   | 10.03554123   |  |  |
| 7.846080709     |                |               |               |  |  |
| PLA2G2E PLA2G2E | 1.041678189    | 0 0           | 0             |  |  |
| CYB5R3 CYB5R3   | 7259.455297    | 5299.623872   | 5555.229599   |  |  |
| 6228.807323     |                |               |               |  |  |
| FAM65A FAM65A   | 339.5870895    | 771.1745037   | 479.4758586   |  |  |
| 791.4733916     |                |               |               |  |  |
| RAP1GAP RAP1GAP | 4.166712755    | 3.521344766   | 5.575300681   |  |  |
| 10.78836098     |                |               |               |  |  |
| SLC35F4 SLC35F4 | 1.041678189    | 0 5.575300681 | 0             |  |  |
| CLNK CLNK       | 37.50041479    | 27.29042193   | 32.33674395   |  |  |
| 42.17268381     |                |               |               |  |  |
| MCTS1 MCTS1     | 4900.0542      | 5473.050102   | 3942.852642   |  |  |
| 4610.553177     |                |               |               |  |  |
| MBOAT1 MBOAT1   | 780.2169633    | 981.5748535   | 411.4571903   |  |  |
| 250.0938226     |                |               |               |  |  |
| VWA5B1 VWA5B1   | 0 0            | 1.115060136   | 5.884560532   |  |  |
| SERPINI1        | SERPINI1       | 389.5876426   | 235.0497631   |  |  |
| 509.5824823     | 405.0539166    |               |               |  |  |
| NOSTRIN NOSTRIN | 46.87551849    | 95.07630868   | 17.84096218   |  |  |
| 76.49928692     |                |               |               |  |  |
| TMUB1 TMUB1     | 1844.812072    | 1943.782311   | 1336.957103   |  |  |
| 1503.505216     |                |               |               |  |  |
| PTGES3L-AARSD1  | PTGES3L-AARSD1 | 2558.361631   | 1660.314057   |  |  |
| 2401.839534     | 2022.327303    |               |               |  |  |
| HDAC11 HDAC11   | 65.62572589    | 89.79429153   | 337.8632213   |  |  |
| 238.3247015     |                |               |               |  |  |
| USP44 USP44     | 31.25034566    | 344.2114509   | 122.656615    |  |  |
| 435.4574794     |                |               |               |  |  |
| ASIC1 ASIC1     | 27.08363291    | 39.61512861   | 36.7969845    |  |  |



|                 |                 |               |               |  |  |
|-----------------|-----------------|---------------|---------------|--|--|
| 46.09572417     |                 |               |               |  |  |
| DOCK1 DOCK1     | 2.083356377     | 30.8117667    | 13.38072164   |  |  |
| 6.865320621     |                 |               |               |  |  |
| NAA60 NAA60     | 3427.121241     | 3745.830495   | 4065.509257   |  |  |
| 3259.065775     |                 |               |               |  |  |
| COL4A6 COL4A6   | 0 2.641008574 0 | 0             | 0             |  |  |
| GOT1 GOT1       | 4024.002843     | 3276.611305   | 3282.737041   |  |  |
| 3133.528483     |                 |               |               |  |  |
| ARPC4-TTLL3     | ARPC4-TTLL3     | 7062.578119   | 6154.430314   |  |  |
| 4685.482693     | 5018.549374     |               |               |  |  |
| PCCB PCCB       | 4408.382095     | 3527.507119   | 3047.459352   |  |  |
| 3968.155319     |                 |               |               |  |  |
| SNORD1A SNORD1A | 9.375103698     | 8.803361914   | 21.18614259   |  |  |
| 5.884560532     |                 |               |               |  |  |
| AOAH AOAH       | 808.3422744     | 919.0709839   | 611.0529547   |  |  |
| 794.4156718     |                 |               |               |  |  |
| KLHL14 KLHL14   | 0 0             | 0 7.846080709 |               |  |  |
| YWHAQ YWHAQ     | 36214.98391     | 47747.67435   | 31570.69764   |  |  |
| 45489.61443     |                 |               |               |  |  |
| CKAP4 CKAP4     | 465.6301503     | 302.8356499   | 640.0445182   |  |  |
| 476.6494031     |                 |               |               |  |  |
| PKIA PKIA       | 6482.363368     | 4075.07623    | 3601.64424    |  |  |
| 3992.674321     |                 |               |               |  |  |
| SUN2 SUN2       | 23319.00793     | 27968.2808    | 16547.49242   |  |  |
| 18245.07993     |                 |               |               |  |  |
| SPAG4 SPAG4     | 38.54209298     | 100.3583258   | 40.14216491   |  |  |
| 93.17220842     |                 |               |               |  |  |
| CBFA2T2 CBFA2T2 | 1265.638999     | 1304.658236   | 1915.673314   |  |  |
| 1565.293102     |                 |               |               |  |  |
| S100A9 S100A9   | 12.50013826     | 21.12806859   | 0 4.903800443 |  |  |
| PITPNB PITPNB   | 5430.268398     | 3751.992848   | 5181.684453   |  |  |
| 4791.993793     |                 |               |               |  |  |
| ZNF45 ZNF45     | 1238.555366     | 1274.726805   | 1197.574586   |  |  |
| 1269.103555     |                 |               |               |  |  |
| TRAPPC10        | TRAPPC10        | 3303.161536   | 5458.084387   |  |  |
| 3658.512307     | 3633.716129     |               |               |  |  |
| GALR3 GALR3     | 10.41678189     | 10.5640343    | 2.230120273   |  |  |
| 6.865320621     |                 |               |               |  |  |
| PBRM1 PBRM1     | 7643.834549     | 7871.085888   | 6607.846368   |  |  |
| 5808.061245     |                 |               |               |  |  |
| PAPPA2 PAPPA2   | 0 0             | 17.84096218   | 0.980760089   |  |  |
| NFE2L1 NFE2L1   | 1114.595662     | 2613.718152   | 1875.531149   |  |  |
| 1421.121368     |                 |               |               |  |  |
| CACFD1 CACFD1   | 42.70880574     | 54.58084387   | 216.3216664   |  |  |
| 92.19144833     |                 |               |               |  |  |
| ZRANB1 ZRANB1   | 1238.555366     | 1244.795375   | 2243.500994   |  |  |
| 1528.024218     |                 |               |               |  |  |
| RNF40 RNF40     | 3840.667482     | 5627.108936   | 4227.192977   |  |  |
| 4453.631563     |                 |               |               |  |  |
| MMP14 MMP14     | 1.041678189     | 1.760672383   | 0 0           |  |  |

|             |           |             |             |             |
|-------------|-----------|-------------|-------------|-------------|
| FXN         | FXN       | 3220.868959 | 1886.560458 | 1807.512481 |
| 1773.21424  |           |             |             |             |
| CD1B        | CD1B      | 0           | 1.760672383 | 16.72590204 |
| 3.923040355 |           |             |             |             |
| FKSG29      | FKSG29    | 0           | 0           | 0           |
| 1.961520177 |           |             |             |             |
| LOC286367   | LOC286367 |             | 4.166712755 | 2.641008574 |
| 17.84096218 |           | 6.865320621 |             |             |
| MIR4754     | MIR4754   | 6.250069132 | 3.521344766 | 0           |
| 3.923040355 |           |             |             |             |
| SPRED2      | SPRED2    | 273.9613636 | 290.5109432 | 276.5349138 |
| 336.4007104 |           |             |             |             |
| FBL         | FBL       | 4034.419625 | 4381.433225 | 4349.849592 |
| 4445.785482 |           |             |             |             |
| TMEM56      | TMEM56    | 0           | 3.521344766 | 8.92048109  |
| 14.71140133 |           |             |             |             |
| TOP1MT      | TOP1MT    | 417.7129537 | 463.0568367 | 593.2119925 |
| 946.4334856 |           |             |             |             |
| TRIM37      | TRIM37    | 3061.492197 | 2725.520849 | 2515.575667 |
| 2271.440365 |           |             |             |             |
| CLK1        | CLK1      | 2130.231896 | 2273.028046 | 4789.183285 |
| 3359.103304 |           |             |             |             |
| CXCR3       | CXCR3     | 7784.461104 | 7417.712749 | 2908.076835 |
| 3158.047486 |           |             |             |             |
| SLC4A10     | SLC4A10   | 101.0427843 | 311.6390118 | 66.90360818 |
| 308.9394279 |           |             |             |             |
| PDCD6       | PDCD6     | 8573.011493 | 6738.093209 | 7741.862526 |
| 7399.834869 |           |             |             |             |
| PEMT        | PEMT      | 932.3019789 | 765.0121504 | 931.0752138 |
| 1053.336335 |           |             |             |             |
| BAX         | BAX       | 4855.262038 | 5586.613471 | 4511.533311 |
| 2952.087867 |           |             |             |             |
| FBLN5       | FBLN5     | 100.0011061 | 197.1953069 | 457.1746559 |
| 326.5931095 |           |             |             |             |
| SLC38A1     | SLC38A1   | 23252.34053 | 24949.608   | 22991.42495 |
| 23108.66921 |           |             |             |             |
| PCNP        | PCNP      | 9861.567412 | 8842.096707 | 12077.21634 |
| 10202.8472  |           |             |             |             |
| MECR        | MECR      | 1817.728439 | 1300.256555 | 1258.902894 |
| 1771.25272  |           |             |             |             |
| PRSS36      | PRSS36    | 37.50041479 | 29.93143051 | 23.41626286 |
| 20.59596186 |           |             |             |             |
| PKIG        | PKIG      | 98.95942793 | 172.5458935 | 121.5415549 |
| 238.3247015 |           |             |             |             |
| DNM2        | DNM2      | 14979.33235 | 18299.54841 | 10090.17917 |
| 12273.23175 |           |             |             |             |
| PPM1B       | PPM1B     | 6269.861018 | 5488.896154 | 6285.593988 |
| 5597.197826 |           |             |             |             |
| PLXDC1      | PLXDC1    | 9.375103698 | 0.880336191 | 84.74457036 |
| 72.57624656 |           |             |             |             |
| GYS2        | GYS2      | 12.50013826 | 7.042689532 | 25.64638313 |
| 12.74988115 |           |             |             |             |
| CCDC87      | CCDC87    | 0           | 13.20504287 | 28.99156354 |
| 5.884560532 |           |             |             |             |
| RNF31       | RNF31     | 3561.497727 | 3266.927606 | 4223.847796 |

|             |           |             |             |             |   |
|-------------|-----------|-------------|-------------|-------------|---|
| 3517.005678 |           |             |             |             |   |
| TAF6L       | TAF6L     | 1392.723738 | 1029.113008 | 1171.928203 |   |
| 1232.815431 |           |             |             |             |   |
| CES4A       | CES4A     | 436.4631611 | 280.8272451 | 286.570455  |   |
| 323.6508293 |           |             |             |             |   |
| GNAI2       | GNAI2     | 48592.20415 | 48179.03909 | 24665.13021 |   |
| 30557.54208 |           |             |             |             |   |
| TRNT1       | TRNT1     | 2804.197684 | 2293.275779 | 2666.108786 |   |
| 3073.702118 |           |             |             |             |   |
| ZNF574      | ZNF574    | 2412.526685 | 1927.055923 | 3359.676191 |   |
| 2697.090244 |           |             |             |             |   |
| EXOSC9      | EXOSC9    | 5908.398686 | 5883.286767 | 4585.12728  |   |
| 5175.470988 |           |             |             |             |   |
| LRRC2       | LRRC2     | 14.58349464 | 33.45277527 | 4.460240545 |   |
| 37.26888337 |           |             |             |             |   |
| IRF2BPL     | IRF2BPL   | 155.2100501 | 429.6040614 | 376.8903261 |   |
| 319.7277889 |           |             |             |             |   |
| NPEPPS      | NPEPPS    | 6108.400899 | 6091.046109 | 5343.368173 |   |
| 6820.205657 |           |             |             |             |   |
| CD70        | CD70      | 5676.10445  | 2108.405178 | 1883.33657  |   |
| 930.7413241 |           |             |             |             |   |
| SPATA5      | SPATA5    | 800.0088489 | 906.7462772 | 553.0698276 |   |
| 713.9933446 |           |             |             |             |   |
| GPR124      | GPR124    | 138.5431991 | 105.640343  | 181.7548022 |   |
| 83.36460754 |           |             |             |             |   |
| FAM126A     | FAM126A   | 9161.55967  | 6982.82667  | 3557.041835 |   |
| 2868.723259 |           |             |             |             |   |
| ZSCAN21     | ZSCAN21   | 732.2997667 | 473.620871  | 826.259561  |   |
| 667.8976204 |           |             |             |             |   |
| TXNDC11     | TXNDC11   | 8678.22099  | 11014.76643 | 5555.229599 |   |
| 5652.120391 |           |             |             |             |   |
| CLDN6       | CLDN6     | 0           | 0           | 0.980760089 |   |
| SLC2A2      | SLC2A2    | 0           | 1.115060136 | 0           |   |
| PCMTD1      | PCMTD1    | 816.6756999 | 1093.37755  | 2007.108245 |   |
| 1334.814481 |           |             |             |             |   |
| TPI1P2      | TPI1P2    | 36.4587366  | 77.46958485 | 52.4078264  |   |
| 34.3266031  |           |             |             |             |   |
| POLE4       | POLE4     | 2935.449136 | 2370.745364 | 2271.377498 |   |
| 1484.870774 |           |             |             |             |   |
| PREX1       | PREX1     | 6881.326115 | 11044.69786 | 4645.340528 |   |
| 5727.638918 |           |             |             |             |   |
| DHRS4       | DHRS4     | 817.7173781 | 919.9513201 | 813.9938995 |   |
| 1111.20118  |           |             |             |             |   |
| CDK5R1      | CDK5R1    | 109.3762098 | 142.614463  | 607.7077743 |   |
| 605.1289747 |           |             |             |             |   |
| LCMT1-AS2   | LCMT1-AS2 |             | 1.041678189 | 1.760672383 | 0 |
| 3.923040355 |           |             |             |             |   |
| FANCI       | FANCI     | 16221.01275 | 17554.78399 | 8656.211838 |   |
| 13311.85668 |           |             |             |             |   |
| POLR3B      | POLR3B    | 1493.766523 | 910.2676219 | 1401.630591 |   |

|             |             |             |             |             |
|-------------|-------------|-------------|-------------|-------------|
| 1506.447496 |             |             |             |             |
| SPRY2       | SPRY2       | 15.62517283 | 20.2477324  | 14.49578177 |
| 50.99952461 |             |             |             |             |
| FAM174B     | FAM174B     | 402.0877808 | 762.3711418 | 199.5957644 |
| 442.3228    |             |             |             |             |
| RBPMS2      | RBPMS2      | 1.041678189 | 0           | 0           |
| 5.884560532 |             |             |             |             |
| PCNXL4      | PCNXL4      | 2333.359143 | 2352.258304 | 2443.096759 |
| 2441.111861 |             |             |             |             |
| ZDHHC6      | ZDHHC6      | 5669.854381 | 5347.162027 | 4757.961601 |
| 5939.483097 |             |             |             |             |
| CDK18       | CDK18       | 0           | 9.683698106 | 64.6734879  |
| 25.49976231 |             |             |             |             |
| PARP12      | PARP12      | 5364.642672 | 4425.450034 | 6982.506573 |
| 5238.239634 |             |             |             |             |
| EML3        | EML3        | 1523.97519  | 2894.545397 | 1497.525763 |
| 2043.904025 |             |             |             |             |
| SLC29A4     | SLC29A4     | 1.041678189 | 1.760672383 | 20.07108245 |
| 31.38432284 |             |             |             |             |
| NPHP3       | NPHP3       | 279.1697546 | 331.006408  | 461.6348964 |
| 580.6099725 |             |             |             |             |
| SIK2        | SIK2        | 54.16726581 | 122.3667306 | 36.7969845  |
| 64.73016585 |             |             |             |             |
| TMEM259     | TMEM259     | 7442.790658 | 7634.275452 | 5947.730767 |
| 7339.027744 |             |             |             |             |
| ZNF436      | ZNF436      | 641.6737642 | 640.8847474 | 1253.327593 |
| 804.2232727 |             |             |             |             |
| SYCP2L      | SYCP2L      | 0           | 0           | 3.345180409 |
| 1.961520177 |             |             |             |             |
| COX7C       | COX7C       | 10696.99332 | 13180.39346 | 11293.32906 |
| 10897.22535 |             |             |             |             |
| FBN2        | FBN2        | 0           | 0           | 0.980760089 |
| 0.980760089 |             |             |             |             |
| FAM131A     | FAM131A     | 58.33397857 | 207.7593412 | 110.3909535 |
| 97.09524878 |             |             |             |             |
| TCTN2       | TCTN2       | 110.417888  | 162.8621954 | 101.4704724 |
| 106.9028497 |             |             |             |             |
| DNM3        | DNM3        | 35.41705842 | 56.34151625 | 88.08975076 |
| 62.76864567 |             |             |             |             |
| MIR2110     | MIR2110     | 112.5012444 | 113.5633687 | 198.4807043 |
| 107.8836098 |             |             |             |             |
| MIR1914     | MIR1914     | 5.208390943 | 2.641008574 | 6.690360818 |
| 5.884560532 |             |             |             |             |
| MIR1913     | MIR1913     | 1.041678189 | 0           | 0           |
| 0.980760089 |             |             |             |             |
| MIR1909     | MIR1909     | 6.250069132 | 25.52974955 | 13.38072164 |
| 8.826840798 |             |             |             |             |
| MIR1827     | MIR1827     | 0           | 0.880336191 | 0           |
| 0           |             |             |             |             |
| MIR320D1    | MIR320D1    | 0           | 1.760672383 | 0           |
| 0.980760089 |             |             |             |             |
| MIR103B2    | MIR103B2    | 25.00027653 | 16.72638764 |             |
| 30.10662368 | 17.6536816  |             |             |             |
| C21orf91    | C21orf91    | 3870.876149 | 4729.16602  |             |
| 4495.922469 | 3264.950335 |             |             |             |
| GTF2IRD2    | GTF2IRD2    | 175.0019357 | 107.4010154 |             |

|             |           |             |             |             |
|-------------|-----------|-------------|-------------|-------------|
| 466.095137  |           | 256.9591432 |             |             |
| SBK1        | SBK1      | 126.0430608 | 382.0659071 | 473.9005579 |
| 235.3824213 |           |             |             |             |
| INTS1       | INTS1     | 2466.693951 | 6529.453532 | 3516.89967  |
| 3835.752707 |           |             |             |             |
| CPB1        | CPB1      | 0           | 3.345180409 | 0           |
| S100A11     | S100A11   | 15628.29787 | 15696.39429 | 11221.96521 |
| 9746.793761 |           |             |             |             |
| HDAC1       | HDAC1     | 24902.35878 | 22456.49591 | 14716.56368 |
| 17901.8139  |           |             |             |             |
| SNAPC4      | SNAPC4    | 389.5876426 | 698.986936  | 567.5656094 |
| 503.1299255 |           |             |             |             |
| EIF5        | EIF5      | 15998.09362 | 11510.3957  | 19662.97044 |
| 14612.34456 |           |             |             |             |
| SNAPC2      | SNAPC2    | 1244.805435 | 1035.275361 | 1006.899303 |
| 1114.143461 |           |             |             |             |
| CALM3       | CALM3     | 18390.82842 | 23960.99046 | 12373.82233 |
| 12197.71322 |           |             |             |             |
| FCF1        | FCF1      | 1406.265555 | 2081.995093 | 2040.560049 |
| 2237.113762 |           |             |             |             |
| CCP110      | CCP110    | 5224.016116 | 5073.377471 | 3409.853897 |
| 3263.969575 |           |             |             |             |
| NEU3        | NEU3      | 315.6284912 | 466.5781815 | 274.3047935 |
| 346.2083113 |           |             |             |             |
| CPLX2       | CPLX2     | 0           | 0           | 0.980760089 |
| AAAS        | AAAS      | 5632.353966 | 3708.856375 | 3484.562926 |
| 4087.80805  |           |             |             |             |
| GRIN2B      | GRIN2B    | 1.041678189 | 0           | 0           |
| PNMA2       | PNMA2     | 2.083356377 | 36.97412004 | 55.75300681 |
| 110.82589   |           |             |             |             |
| PTGES       | PTGES     | 7.291747321 | 0.880336191 | 7.805420954 |
| 11.76912106 |           |             |             |             |
| GOSR1       | GOSR1     | 3388.579148 | 3268.688279 | 4103.421301 |
| 3330.661261 |           |             |             |             |
| ITM2A       | ITM2A     | 19205.42077 | 20562.01242 | 13210.11743 |
| 14667.26713 |           |             |             |             |
| SNF8        | SNF8      | 5430.268398 | 4553.979118 | 4441.284523 |
| 3777.887862 |           |             |             |             |
| CD48        | CD48      | 7926.129338 | 4630.568367 | 8081.955868 |
| 6095.423951 |           |             |             |             |
| TBC1D2      | TBC1D2    | 535.422589  | 551.970792  | 404.7668295 |
| 534.5142483 |           |             |             |             |
| AGPAT4      | AGPAT4    | 115.6262789 | 151.4178249 | 30.10662368 |
| 101.9990492 |           |             |             |             |
| LZTFL1      | LZTFL1    | 326.0452731 | 153.1784973 | 497.3168208 |
| 355.0351521 |           |             |             |             |
| ST7-AS1     | ST7-AS1   | 204.168925  | 104.7600068 | 117.0813143 |
| 108.8643698 |           |             |             |             |
| CENPBD1P1   | CENPBD1P1 |             | 984.3858883 | 1112.744946 |
| 1258.902894 |           | 940.548925  |             |             |

|             |             |             |             |             |
|-------------|-------------|-------------|-------------|-------------|
| PKD1        | PKD1        | 202.0855686 | 560.7741539 | 444.9089944 |
| 522.7451273 |             |             |             |             |
| ARAF        | ARAF        | 7144.870696 | 5421.990603 | 5964.456669 |
| 5926.733216 |             |             |             |             |
| SHROOM2     | SHROOM2     | 0           | 14.96571525 | 0           |
| 3.923040355 |             |             |             |             |
| PPFIA1      | PPFIA1      | 2026.064077 | 2226.370228 | 2003.763065 |
| 2110.595711 |             |             |             |             |
| CYP26A1     | CYP26A1     | 7.291747321 | 3.521344766 | 0           |
| 0           |             |             |             |             |
| TMC4        | TMC4        | 21.87524196 | 20.2477324  | 13.38072164 |
| 19.61520177 |             |             |             |             |
| DAP         | DAP         | 6507.363645 | 4817.19964  | 4989.89411  |
| 4582.111134 |             |             |             |             |
| CREBBP      | CREBBP      | 787.5087107 | 1777.398771 | 1629.102859 |
| 1395.621606 |             |             |             |             |
| SLC25A36    | SLC25A36    |             | 1792.728163 | 1782.680788 |
| 2513.345547 | 2303.805448 |             |             |             |
| GPM6B       | GPM6B       | 35.41705842 | 23.76907717 | 84.74457036 |
| 62.76864567 |             |             |             |             |
| PGM2L1      | PGM2L1      | 1450.016039 | 832.7980371 | 1486.375162 |
| 1067.066976 |             |             |             |             |
| CDCP2       | CDCP2       | 3.125034566 | 0.880336191 | 0           |
| 13.73064124 |             |             |             |             |
| PDCL3       | PDCL3       | 4167.754433 | 3266.927606 | 2916.997316 |
| 2675.513522 |             |             |             |             |
| GPR19       | GPR19       | 861.4678621 | 1165.565117 | 457.1746559 |
| 834.6268355 |             |             |             |             |
| DYNC1LI2    | DYNC1LI2    |             | 2423.985145 | 2437.650914 |
| 2257.996776 | 2460.727062 |             |             |             |
| LARP7       | LARP7       | 2737.53028  | 2081.995093 | 2447.556999 |
| 2252.805924 |             |             |             |             |
| HLA-DRB3    | HLA-DRB3    |             | 22.91692015 | 9.683698106 |
| 2.230120273 | 0.980760089 |             |             |             |
| ACKR4       | ACKR4       | 3.125034566 | 10.5640343  | 13.38072164 |
| 89.24916807 |             |             |             |             |
| RNF169      | RNF169      | 673.9657881 | 821.3536666 | 1170.813143 |
| 671.8206607 |             |             |             |             |
| KDM6B       | KDM6B       | 90.62600242 | 186.6312726 | 383.5806869 |
| 293.2472665 |             |             |             |             |
| SEZ6        | SEZ6        | 6.250069132 | 24.64941336 | 80.28432981 |
| 16.67292151 |             |             |             |             |
| GALNT4      | GALNT4      | 1985.438628 | 1375.965467 | 1343.647464 |
| 1027.836573 |             |             |             |             |
| IK          | IK          | 9343.853353 | 8185.365908 | 9803.608718 |
| 9434.912053 |             |             |             |             |
| TMEM97      | TMEM97      | 3339.620273 | 2630.44454  | 2340.511226 |
| 2774.570291 |             |             |             |             |
| TM9SF4      | TM9SF4      | 4159.421007 | 4345.339441 | 3819.080967 |
| 5088.18334  |             |             |             |             |
| MLEC        | MLEC        | 9338.644962 | 10630.05951 | 8170.045618 |
| 7319.412542 |             |             |             |             |
| PHYHIP      | PHYHIP      | 1.041678189 | 0           | 0           |
|             |             |             | 0           | 0           |

|              |              |             |             |             |
|--------------|--------------|-------------|-------------|-------------|
| SNX19        | SNX19        | 3323.9951   | 4442.176422 | 4243.918879 |
| 4385.959117  |              |             |             |             |
| PHACTR2      | PHACTR2      | 2965.657803 | 2703.512444 | 2431.946157 |
| 2469.553903  |              |             |             |             |
| PRKRA        | PRKRA        | 3057.325484 | 3002.826749 | 3958.463484 |
| 3790.637743  |              |             |             |             |
| AKR7A2       | AKR7A2       | 3662.540511 | 3481.729637 | 2619.27626  |
| 3313.00758   |              |             |             |             |
| TNFRSF10C    | TNFRSF10C    | 0           | 1.760672383 | 17.84096218 |
| 7.846080709  |              |             |             |             |
| FADD         | FADD         | 3182.326866 | 3442.114509 | 3259.320778 |
| 2922.665064  |              |             |             |             |
| FAM168A      | FAM168A      | 225.0024888 | 460.4158281 | 254.2337111 |
| 265.785984   |              |             |             |             |
| FOXD2        | FOXD2        | 36.4587366  | 58.10218863 | 24.531323   |
| 37.26888337  |              |             |             |             |
| GOSR2        | GOSR2        | 6155.276417 | 4316.288347 | 5817.268731 |
| 5537.371461  |              |             |             |             |
| GPR101       | GPR101       | 0           | 3.521344766 | 0           |
| 6.865320621  |              |             |             |             |
| ARID1A       | ARID1A       | 1571.892387 | 3567.122248 | 2852.323829 |
| 2349.901172  |              |             |             |             |
| C11orf24     | C11orf24     | 1860.437245 | 1175.248816 |             |
| 1852.114886  | 1815.386924  |             |             |             |
| ITGB1BP1     | ITGB1BP1     | 9776.149801 | 7346.405518 |             |
| 5957.766308  | 6093.462431  |             |             |             |
| MY01E        | MY01E        | 4491.71635  | 3545.994179 | 716.9836676 |
| 1064.124696  |              |             |             |             |
| NUP133       | NUP133       | 4413.590486 | 4343.578769 | 3853.647831 |
| 4371.247715  |              |             |             |             |
| CISD1        | CISD1        | 2815.656144 | 2603.154118 | 2315.979903 |
| 2224.363881  |              |             |             |             |
| LOC101060351 | LOC101060351 | 42.70880574 | 54.58084387 |             |
| 51.29276627  | 65.71092594  |             |             |             |
| ARMCX4       | ARMCX4       | 30.20866747 | 21.12806859 | 59.09818722 |
| 92.19144833  |              |             |             |             |
| C11orf45     | C11orf45     | 2.083356377 | 4.401680957 |             |
| 1.115060136  | 9.807600887  |             |             |             |
| ISG20L2      | ISG20L2      | 3932.335162 | 2603.154118 | 3030.73345  |
| 2990.33751   |              |             |             |             |
| ARPC5L       | ARPC5L       | 6675.073833 | 5674.64709  | 4963.132667 |
| 5940.463857  |              |             |             |             |
| FAM47E-STBD1 | FAM47E-STBD1 | 273.9613636 | 353.895149  |             |
| 149.4180583  | 189.2866971  |             |             |             |
| DNAI1        | DNAI1        | 0           | 1.115060136 | 0           |
| TFIP11       | TFIP11       | 7304.247459 | 6434.377223 | 6757.264426 |
| 6318.056491  |              |             |             |             |
| CCNDBP1      | CCNDBP1      | 8992.807803 | 7632.51478  | 7450.831831 |
| 7587.160046  |              |             |             |             |
| INTS6        | INTS6        | 3794.833641 | 4213.289012 | 4280.715863 |
| 4078.000449  |              |             |             |             |

|             |            |             |             |             |             |
|-------------|------------|-------------|-------------|-------------|-------------|
| DDX41       | DDX41      | 5542.769642 | 4626.166686 | 4559.480897 |             |
| 5837.484048 |            |             |             |             |             |
| POLK        | POLK       | 2693.779796 | 2297.67746  | 2590.284697 |             |
| 2572.533713 |            |             |             |             |             |
| KLRK1       | KLRK1      | 185.4187176 | 14.96571525 | 1786.326338 |             |
| 62.76864567 |            |             |             |             |             |
| TSPYL5      | TSPYL5     | 108.3345316 | 243.853125  | 63.55842777 |             |
| 269.7090244 |            |             |             |             |             |
| CARKD       | CARKD      | 2225.024611 | 2406.839147 | 2488.814224 |             |
| 2597.052715 |            |             |             |             |             |
| FAM86EP     | FAM86EP    | 162.5017974 | 62.50386959 | 270.9596131 |             |
| 149.0755335 |            |             |             |             |             |
| FAM86JP     | FAM86JP    | 38.54209298 | 32.57243908 | 55.75300681 |             |
| 68.65320621 |            |             |             |             |             |
| ITIH3       | ITIH3      | 5.208390943 | 2.641008574 | 2.230120273 | 0           |
| PIGV        | PIGV       | 916.6768061 | 494.7489396 | 1487.490222 |             |
| 979.7793286 |            |             |             |             |             |
| ACADS       | ACADS      | 1644.80986  | 1798.526839 | 1563.314311 |             |
| 1813.425404 |            |             |             |             |             |
| MFAP4       | MFAP4      | 26.04195472 | 26.41008574 | 21.18614259 |             |
| 26.48052239 |            |             |             |             |             |
| DMXL1       | DMXL1      | 621.8818787 | 1200.778565 | 1108.369775 |             |
| 827.7615148 |            |             |             |             |             |
| GPR113      | GPR113     | 134.3764863 | 165.503204  | 192.9054036 |             |
| 186.3444168 |            |             |             |             |             |
| CMKLR1      | CMKLR1     | 1.041678189 | 0           | 0           | 0           |
| CALML3-AS1  | CALML3-AS1 | 0           | 0.880336191 | 0           | 0           |
| APCDD1L     | APCDD1L    | 7.291747321 | 0.880336191 | 12.2656615  |             |
| 4.903800443 |            |             |             |             |             |
| PARP2       | PARP2      | 2669.821198 | 2221.088211 | 2071.781733 |             |
| 2089.018989 |            |             |             |             |             |
| IL18RAP     | IL18RAP    | 945.8437953 | 691.9442465 | 965.642078  |             |
| 1512.332057 |            |             |             |             |             |
| CAV2        | CAV2       | 0           | 0.880336191 | 1.115060136 | 2.942280266 |
| TUBB2A      | TUBB2A     | 296.8782838 | 202.477324  | 597.672233  |             |
| 456.0534412 |            |             |             |             |             |
| KCNK15      | KCNK15     | 8.33342551  | 12.32470668 | 41.25722504 |             |
| 64.73016585 |            |             |             |             |             |
| APPL1       | APPL1      | 2403.151581 | 3666.600237 | 2693.985289 |             |
| 2651.97528  |            |             |             |             |             |
| CD8A        | CD8A       | 483.3386796 | 227.1267374 | 3364.136431 |             |
| 159.8638945 |            |             |             |             |             |
| HSPA14      | HSPA14     | 6563.614267 | 5833.107604 | 6078.192803 |             |
| 5799.234404 |            |             |             |             |             |
| ZNF292      | ZNF292     | 2879.198514 | 5065.454446 | 5312.146489 |             |
| 4428.1318   |            |             |             |             |             |
| 15-Sep      | 15-Sep     | 10425.11531 | 9838.637276 | 11036.86523 |             |
| 8999.454574 |            |             |             |             |             |
| TOX4        | TOX4       | 5537.561251 | 4976.54049  | 4587.357401 |             |
| 4599.764816 |            |             |             |             |             |



|             |             |             |             |             |             |             |
|-------------|-------------|-------------|-------------|-------------|-------------|-------------|
| CLEC4D      | CLEC4D      | 1.041678189 | 0           | 0           | 0           |             |
| GPKOW       | GPKOW       | 3105.242681 | 2351.377967 |             | 2363.927489 |             |
| 2398.939177 |             |             |             |             |             |             |
| FRMD8       | FRMD8       | 5871.93995  | 5565.485402 |             | 4919.645321 |             |
| 5492.256497 |             |             |             |             |             |             |
| AGGF1       | AGGF1       | 3215.660569 | 2944.72456  |             | 3354.10089  |             |
| 3364.987864 |             |             |             |             |             |             |
| MIR6501     | MIR6501     | 148.959981  | 286.1092622 |             | 208.5162455 |             |
| 206.9403787 |             |             |             |             |             |             |
| MIR378J     | MIR378J     | 8.33342551  | 1.760672383 |             | 1.115060136 |             |
| 3.923040355 |             |             |             |             |             |             |
| MIR6126     | MIR6126     | 207.2939596 | 235.9300993 |             | 236.3927489 |             |
| 209.882659  |             |             |             |             |             |             |
| MIR6125     | MIR6125     | 319.7952039 | 211.2806859 |             | 301.0662368 |             |
| 283.4396656 |             |             |             |             |             |             |
| MIR6124     | MIR6124     | 3.125034566 | 3.521344766 |             | 4.460240545 |             |
| 8.826840798 |             |             |             |             |             |             |
| MIR6090     | MIR6090     | 12.50013826 | 31.69210289 |             | 10.03554123 |             |
| 19.61520177 |             |             |             |             |             |             |
| ATP6V1C2    | ATP6V1C2    |             | 12183.4681  |             | 9747.962648 |             |
| 7582.408927 | 8975.916331 |             |             |             |             |             |
| PPEF1       | PPEF1       | 0           | 0           | 1.115060136 | 0           |             |
| HNRNPUL2    | HNRNPUL2    |             | 702.0910992 |             | 1354.837399 |             |
| 578.7162107 | 576.6869321 |             |             |             |             |             |
| DPYSL5      | DPYSL5      | 0           | 0           | 0           | 0.980760089 |             |
| LINC00852   | LINC00852   |             | 64.5840477  |             | 86.27294676 |             |
| 64.6734879  | 67.67244612 |             |             |             |             |             |
| ERBB2IP     | ERBB2IP     | 3015.658356 | 5713.381882 |             | 4973.168208 |             |
| 4290.825388 |             |             |             |             |             |             |
| MIR93       | MIR93       | 22.91692015 | 13.20504287 |             | 26.76144327 |             |
| 38.24964346 |             |             |             |             |             |             |
| SERHL       | SERHL       | 1164.596215 | 1620.698928 |             | 1252.212533 |             |
| 2278.305686 |             |             |             |             |             |             |
| MT1DP       | MT1DP       | 6.250069132 | 15.84605145 |             | 5.575300681 |             |
| 13.73064124 |             |             |             |             |             |             |
| C3orf17     | C3orf17     | 2072.939596 | 1968.431724 |             | 2388.458812 |             |
| 2606.860316 |             |             |             |             |             |             |
| RUVBL2      | RUVBL2      | 11388.66764 | 8603.525599 |             | 6873.23068  |             |
| 8570.862415 |             |             |             |             |             |             |
| UCA1        | UCA1        | 4.166712755 | 13.20504287 |             | 32.33674395 |             |
| 6.865320621 |             |             |             |             |             |             |
| GRIK1-AS1   | GRIK1-AS1   |             | 0           | 0           | 1.115060136 | 0           |
| PPWD1       | PPWD1       | 4539.633546 | 3311.824752 |             | 3538.085812 |             |
| 3985.809    |             |             |             |             |             |             |
| ERLIN2      | ERLIN2      | 427.0880574 | 360.9378385 |             | 378.0053862 |             |
| 323.6508293 |             |             |             |             |             |             |
| TARP        | TARP        | 614.5901313 | 190.1526174 |             | 307.7565976 |             |
| 97.09524878 |             |             |             |             |             |             |
| ABCC9       | ABCC9       | 0           | 0           | 0           | 0.980760089 |             |
| GTSF1L      | GTSF1L      | 9.375103698 | 10.5640343  | 0           | 0           | 11.76912106 |

|             |             |             |             |             |             |
|-------------|-------------|-------------|-------------|-------------|-------------|
| PKHD1       | PKHD1       | 0           | 1.760672383 | 4.460240545 | 4.903800443 |
| FAM151A     | FAM151A     | 25.00027653 | 32.57243908 | 0           | 40.21116364 |
| MTFR2       | MTFR2       | 2414.610041 | 2263.344348 | 1236.601691 |             |
| 1575.100702 |             |             |             |             |             |
| C14orf93    | C14orf93    |             | 378.1291825 | 353.895149  |             |
| 379.1204463 | 337.3814705 |             |             |             |             |
| FHDC1       | FHDC1       | 0           | 2.641008574 | 5.575300681 | 0.980760089 |
| C17orf58    | C17orf58    |             | 835.4259073 | 992.1388878 |             |
| 684.6469237 | 1002.336811 |             |             |             |             |
| BCL2        | BCL2        | 1420.849049 | 1256.239745 | 2780.95998  |             |
| 1674.157471 |             |             |             |             |             |
| FAAH        | FAAH        | 73.9591514  | 54.58084387 | 86.97469063 |             |
| 197.1327778 |             |             |             |             |             |
| IGHMBP2     | IGHMBP2     | 1472.932959 | 1322.26496  | 1177.503504 |             |
| 1252.430633 |             |             |             |             |             |
| IFNB1       | IFNB1       | 4.166712755 | 1.760672383 | 0           | 0           |
| IFNA10      | IFNA10      | 5.208390943 | 0.880336191 | 0           | 0           |
| IDH2        | IDH2        | 14422.03452 | 14532.58985 | 11252.07184 |             |
| 14363.2315  |             |             |             |             |             |
| MAP2K6      | MAP2K6      | 153.1266937 | 279.9469089 | 107.0457731 |             |
| 188.305937  |             |             |             |             |             |
| DCTN2       | DCTN2       | 9778.233157 | 6979.305326 | 7592.444468 |             |
| 6983.992591 |             |             |             |             |             |
| OR10A4      | OR10A4      | 0           | 1.760672383 | 2.230120273 | 0           |
| VMP1        | VMP1        | 6640.698453 | 6152.669642 | 5214.021197 |             |
| 5727.638918 |             |             |             |             |             |
| CLSTN1      | CLSTN1      | 2190.649231 | 4621.765005 | 2617.04614  |             |
| 2187.094998 |             |             |             |             |             |
| ENDOD1      | ENDOD1      | 1622.934618 | 2199.079806 | 1591.190814 |             |
| 2592.148914 |             |             |             |             |             |
| PLEKHA6     | PLEKHA6     | 0           | 0           | 30.10662368 | 24.51900222 |
| PPP6R1      | PPP6R1      | 16754.35199 | 19767.06884 | 13649.45113 |             |
| 15469.52888 |             |             |             |             |             |
| GOLPH3L     | GOLPH3L     | 1818.770117 | 2148.900643 | 2158.756424 |             |
| 2222.402361 |             |             |             |             |             |
| YLPM1       | YLPM1       | 2916.698928 | 4354.142803 | 3368.596672 |             |
| 3347.334183 |             |             |             |             |             |
| MRPS10      | MRPS10      | 6883.409471 | 5173.735797 | 5245.242881 |             |
| 5371.623006 |             |             |             |             |             |
| EMC9        | EMC9        | 1357.30668  | 1463.11875  | 1266.708315 |             |
| 1436.81353  |             |             |             |             |             |
| RAB26       | RAB26       | 23.95859834 | 58.10218863 | 104.8156528 |             |
| 50.99952461 |             |             |             |             |             |
| CCDC109B    | CCDC109B    |             | 8029.255478 | 8592.961565 |             |
| 7011.498137 | 8062.828689 |             |             |             |             |
| C1orf198    | C1orf198    |             | 830.2175164 | 1665.596074 |             |
| 1314.655901 | 1455.447972 |             |             |             |             |
| GPR128      | GPR128      | 0           | 0.880336191 | 0           | 0           |
| CC2D1B      | CC2D1B      | 1151.054399 | 1752.749357 | 1719.42273  |             |
| 1532.928019 |             |             |             |             |             |

|           |           |             |             |             |             |             |
|-----------|-----------|-------------|-------------|-------------|-------------|-------------|
| ST8SIA5   | ST8SIA5   | 14.58349464 | 0           | 0           | 9.807600887 |             |
| FLJ41278  | FLJ41278  |             | 46.87551849 |             | 41.375801   | 0           |
|           |           | 21.57672195 |             |             |             |             |
| SOX11     | SOX11     | 0           | 0           | 5.575300681 | 1.961520177 |             |
| PPM1D     | PPM1D     | 2336.484177 |             | 1734.262297 | 2517.805788 |             |
|           |           | 1500.562936 |             |             |             |             |
| NUDT15    | NUDT15    | 2459.402204 |             | 2056.465343 | 2018.258847 |             |
|           |           | 1967.404738 |             |             |             |             |
| KIAA1549L | KIAA1549L |             | 2.083356377 |             | 0           | 6.690360818 |
|           |           | 0           |             |             |             |             |
| VPS13D    | VPS13D    | 1229.180263 |             | 2378.668389 | 2156.526304 |             |
|           |           | 1755.560559 |             |             |             |             |
| AKIRIN2   | AKIRIN2   | 3409.412712 |             | 3008.989102 | 3135.549103 |             |
|           |           | 3068.798317 |             |             |             |             |
| ZEB1-AS1  | ZEB1-AS1  |             | 178.1269703 |             | 272.9042193 |             |
|           |           | 157.2234792 |             | 216.7479796 |             |             |
| LINC00599 | LINC00599 |             | 51.04223125 |             | 2.641008574 |             |
|           |           | 24.531323   |             | 5.884560532 |             |             |
| FLJ37453  | FLJ37453  |             | 369.795757  |             | 422.5613719 |             |
|           |           | 569.7957296 |             | 469.7840825 |             |             |
| SEPT7P2   | SEPT7P2   | 459.3800812 |             | 529.0820511 | 719.2137879 |             |
|           |           | 657.1092594 |             |             |             |             |
| ARL3      | ARL3      | 1547.933788 |             | 1983.397439 | 1042.581227 |             |
|           |           | 1476.043933 |             |             |             |             |
| ABCB7     | ABCB7     | 1158.346146 |             | 1389.17051  | 1136.246279 |             |
|           |           | 1534.889539 |             |             |             |             |
| RASL10A   | RASL10A   | 0           | 2.641008574 | 0           | 2.942280266 |             |
| FLII      | FLII      | 17883.53114 |             | 15411.16537 | 11905.49707 |             |
|           |           | 15404.79871 |             |             |             |             |
| ASAP3     | ASAP3     | 0           | 9.683698106 | 25.64638313 | 9.807600887 |             |
| FHOD3     | FHOD3     | 119.7929917 |             | 94.19597248 | 28.99156354 |             |
|           |           | 71.59548647 |             |             |             |             |
| SH2D7     | SH2D7     | 2.083356377 |             | 1.760672383 | 5.575300681 |             |
|           |           | 7.846080709 |             |             |             |             |
| PNMA3     | PNMA3     | 34.37538023 |             | 24.64941336 | 54.63794668 |             |
|           |           | 43.1534439  |             |             |             |             |
| PGAM5     | PGAM5     | 6985.493933 |             | 5653.519021 | 5532.928396 |             |
|           |           | 4972.45365  |             |             |             |             |
| TKTL1     | TKTL1     | 127.084739  |             | 85.39261057 | 24.531323   |             |
|           |           | 29.42280266 |             |             |             |             |
| ANKRD37   | ANKRD37   | 313.5451348 |             | 373.2625452 | 385.8108071 |             |
|           |           | 488.4185242 |             |             |             |             |
| METTL2A   | METTL2A   | 1486.474775 |             | 1350.435718 | 1261.133014 |             |
|           |           | 1358.352723 |             |             |             |             |
| TMC03     | TMC03     | 2011.480582 |             | 2088.157446 | 1460.728779 |             |
|           |           | 2014.481222 |             |             |             |             |
| CPPED1    | CPPED1    | 2420.860111 |             | 2519.52218  | 1237.716751 |             |
|           |           | 1687.888113 |             |             |             |             |
| CFAP44    | CFAP44    | 43.75048393 |             | 36.09378385 | 49.062646   |             |
|           |           | 49.03800443 |             |             |             |             |

|              |              |             |             |             |             |
|--------------|--------------|-------------|-------------|-------------|-------------|
| CHDH         | CHDH         | 945.8437953 | 154.0588335 | 402.5367092 |             |
| 104.9413295  |              |             |             |             |             |
| LAPTM4B      | LAPTM4B      | 5752.146958 | 2832.921864 | 2976.095504 |             |
| 2928.549625  |              |             |             |             |             |
| MUC4         | MUC4         | 14.58349464 | 0.880336191 | 1.115060136 |             |
| 0.980760089  |              |             |             |             |             |
| KIAA1024     | KIAA1024     |             | 21.87524196 | 14.96571525 |             |
| 8.92048109   | 25.49976231  |             |             |             |             |
| CEP128       | CEP128       | 1352.098289 | 2207.002832 | 642.2746385 |             |
| 997.4330102  |              |             |             |             |             |
| SLTM         | SLTM         | 4939.637971 | 5185.180168 | 4756.846541 |             |
| 4177.057218  |              |             |             |             |             |
| PPP1R16A     | PPP1R16A     |             | 350.0038714 | 491.2275948 |             |
| 439.3336937  | 614.9365756  |             |             |             |             |
| KIAA0100     | KIAA0100     |             | 7004.244141 | 13874.09838 |             |
| 9121.191915  | 10025.32963  |             |             |             |             |
| PARP8        | PARP8        | 1408.348911 | 1575.801783 | 3821.311087 |             |
| 2508.784307  |              |             |             |             |             |
| PGAM4        | PGAM4        | 10.41678189 | 7.042689532 | 4.460240545 |             |
| 19.61520177  |              |             |             |             |             |
| C19orf73     | C19orf73     |             | 45.8338403  | 44.89714576 |             |
| 100.3554123  | 56.88408514  |             |             |             |             |
| IKZF4        | IKZF4        | 1622.934618 | 934.9170353 | 1774.060677 |             |
| 841.4921561  |              |             |             |             |             |
| GSG2         | GSG2         | 1472.932959 | 1310.820589 | 839.6402826 |             |
| 764.0121091  |              |             |             |             |             |
| PN01         | PN01         | 4329.214552 | 2537.128904 | 4037.632753 |             |
| 3991.693561  |              |             |             |             |             |
| NXN          | NXN          | 20.83356377 | 9.683698106 | 3.345180409 |             |
| 18.63444168  |              |             |             |             |             |
| NEDD4        | NEDD4        | 742.7165485 | 1088.975869 | 448.2541748 |             |
| 985.6638891  |              |             |             |             |             |
| RHBDF1       | RHBDF1       | 1.041678189 | 10.5640343  | 6.690360818 |             |
| 7.846080709  |              |             |             |             |             |
| CDHR3        | CDHR3        | 4.166712755 | 5.282017149 | 0           | 5.884560532 |
| TBC1D32      | TBC1D32      | 176.0436139 | 288.7502708 | 298.8361165 |             |
| 271.6705446  |              |             |             |             |             |
| ST6GALNAC3   | ST6GALNAC3   |             | 5.208390943 | 3.521344766 |             |
| 18.95602232  | 11.76912106  |             |             |             |             |
| LOC101928445 | LOC101928445 |             | 180.2103266 | 166.3835402 |             |
| 146.0728779  | 191.2482173  |             |             |             |             |
| LOC102724814 | LOC102724814 |             | 4537.55019  | 3931.581431 |             |
| 3295.002703  | 4513.457928  |             |             |             |             |
| LOC283575    | LOC283575    |             | 0           | 7.923025723 | 0           |
| 11.76912106  |              |             |             |             |             |
| MIR135B      | MIR135B      | 0           | 0           | 0.980760089 |             |
| MIR1276      | MIR1276      | 0           | 1.115060136 | 0           |             |
| MIR548H3     | MIR548H3     |             | 0           | 1.115060136 | 0           |
| PATZ1        | PATZ1        | 496.880496  | 1033.514689 | 1005.784243 |             |
| 962.125647   |              |             |             |             |             |

|                 |             |               |             |
|-----------------|-------------|---------------|-------------|
| KIAA0020        | KIAA0020    | 6412.57093    | 3838.265795 |
| 5555.229599     | 5373.584526 |               |             |
| PRG4 PRG4       | 335.4203768 | 381.1855709   | 511.8126025 |
| 491.3608044     |             |               |             |
| PDE6D PDE6D     | 2389.609765 | 2549.45361    | 2152.066063 |
| 2294.978607     |             |               |             |
| PAWR PAWR       | 56.25062219 | 140.8537906   | 51.29276627 |
| 196.1520177     |             |               |             |
| PAPPA PAPPA     | 2.083356377 | 1.760672383   | 11.15060136 |
| 6.865320621     |             |               |             |
| NDEL1 NDEL1     | 3471.913403 | 3123.432807   | 3864.798432 |
| 3426.77575      |             |               |             |
| TMEM40 TMEM40   | 0 0         | 0 1.961520177 |             |
| TMEM140 TMEM140 | 2491.694227 | 2447.334612   | 5374.589857 |
| 3564.082162     |             |               |             |
| CEP104 CEP104   | 2762.530556 | 2196.438798   | 2792.110581 |
| 2373.439415     |             |               |             |
| ECE2 ECE2       | 979.1774974 | 567.8168435   | 917.6944921 |
| 783.6273108     |             |               |             |
| KIAA0408        | KIAA0408    | 223.9608106   | 203.3576602 |
| 192.9054036     | 170.6522554 |               |             |
| ANKRD33B        | ANKRD33B    | 289.5865365   | 300.1946413 |
| 561.9903087     | 198.1135379 |               |             |
| CDK5 CDK5       | 1968.771777 | 1562.59674    | 705.8330663 |
| 1279.891916     |             |               |             |
| NPEPL1 NPEPL1   | 898.9682768 | 823.9946752   | 798.3830576 |
| 833.6460754     |             |               |             |
| NPC1 NPC1       | 2539.611424 | 3428.029129   | 1949.125118 |
| 2332.247491     |             |               |             |
| TXNL1 TXNL1     | 5663.604312 | 4109.409342   | 5008.850132 |
| 3997.578121     |             |               |             |
| LINC00092       | LINC00092   | 28.12531109   | 33.45277527 |
| 60.21324736     | 40.21116364 |               |             |
| SNHG12 SNHG12   | 194.7938213 | 247.3744698   | 363.5096044 |
| 332.4776701     |             |               |             |
| DBIL5P DBIL5P   | 50.00055306 | 40.49546481   | 97.01023186 |
| 40.21116364     |             |               |             |
| EFTUD2 EFTUD2   | 21490.86271 | 15670.86454   | 15471.45939 |
| 17402.60701     |             |               |             |
| RNASEH2A        | RNASEH2A    | 4363.589932   | 4274.912546 |
| 3184.611749     | 3868.11779  |               |             |
| CYTH2 CYTH2     | 2096.898194 | 1589.887162   | 2008.223305 |
| 1865.405689     |             |               |             |
| HLA-D0A HLA-D0A | 15.62517283 | 33.45277527   | 4.460240545 |
| 0.980760089     |             |               |             |
| KLHL11 KLHL11   | 408.33785   | 340.6901061   | 399.1915288 |
| 442.3228        |             |               |             |
| IHH IHH         | 6.250069132 | 1.760672383   | 0 0         |
| TRIP11 TRIP11   | 2455.235491 | 1954.346345   | 2981.670804 |
| 2321.45913      |             |               |             |

|             |             |             |             |             |             |
|-------------|-------------|-------------|-------------|-------------|-------------|
| DPYSL4      | DPYSL4      | 10.41678189 | 12.32470668 | 72.47890886 |             |
| 101.9990492 |             |             |             |             |             |
| HSPB1       | HSPB1       | 652.0905461 | 1290.572857 | 1372.639028 |             |
| 1501.543696 |             |             |             |             |             |
| FGF11       | FGF11       | 18.7502074  | 28.17075813 | 18.95602232 |             |
| 21.57672195 |             |             |             |             |             |
| NLRP1       | NLRP1       | 2809.406075 | 4126.135729 | 2667.223846 |             |
| 3714.138456 |             |             |             |             |             |
| MAML3       | MAML3       | 17.70852921 | 52.82017149 | 44.60240545 |             |
| 102.9798093 |             |             |             |             |             |
| CTAGE6      | CTAGE6      | 2.083356377 | 2.641008574 | 3.345180409 | 0           |
| GBE1        | GBE1        | 1752.102713 | 1681.442126 | 1736.148632 |             |
| 2471.515423 |             |             |             |             |             |
| CEBPA-AS1   | CEBPA-AS1   |             | 0           | 0           | 0.980760089 |
| IL23R       | IL23R       | 309.378422  | 1062.565783 | 347.8987625 |             |
| 1238.699992 |             |             |             |             |             |
| MRPL30      | MRPL30      | 2334.400821 | 2209.643841 | 1937.974517 |             |
| 2107.653431 |             |             |             |             |             |
| ERGIC1      | ERGIC1      | 266.6696163 | 744.764418  | 462.7499566 |             |
| 489.3992842 |             |             |             |             |             |
| ZNF442      | ZNF442      | 29.16698928 | 29.93143051 | 337.8632213 |             |
| 128.4795716 |             |             |             |             |             |
| PGAP1       | PGAP1       | 455.2133685 | 637.3634026 | 1130.670978 |             |
| 496.2646049 |             |             |             |             |             |
| CCDC130     | CCDC130     | 1668.768458 | 1382.127821 | 2086.277515 |             |
| 1840.886686 |             |             |             |             |             |
| NOL9        | NOL9        | 3307.328249 | 2498.394111 | 2760.888897 |             |
| 2614.706396 |             |             |             |             |             |
| SDCBP2-AS1  | SDCBP2-AS1  |             | 260.4195472 | 264.1008574 |             |
| 307.7565976 | 277.5551051 |             |             |             |             |
| PCOLCE-AS1  | PCOLCE-AS1  |             | 16.66685102 | 22.88874098 |             |
| 16.72590204 | 24.51900222 |             |             |             |             |
| LRP4-AS1    | LRP4-AS1    |             | 5.208390943 | 3.521344766 |             |
| 10.03554123 | 9.807600887 |             |             |             |             |
| SORD        | SORD        | 754.1750086 | 780.8582018 | 832.9499218 |             |
| 958.2026066 |             |             |             |             |             |
| XIST        | XIST        | 1270.84739  | 0           | 1930.169096 | 0           |
| NSMCE4A     | NSMCE4A     | 4731.302333 | 3760.79621  | 3354.10089  |             |
| 3575.851283 |             |             |             |             |             |
| METTL1      | METTL1      | 1922.937936 | 1073.129817 | 1896.717292 |             |
| 2147.864594 |             |             |             |             |             |
| BHMT2       | BHMT2       | 0           | 0           | 1.115060136 | 1.961520177 |
| VEZT        | VEZT        | 2554.194919 | 2756.332615 | 1934.629336 |             |
| 2946.203306 |             |             |             |             |             |
| RNF111      | RNF111      | 2605.23715  | 3382.251648 | 2691.755169 |             |
| 2678.455802 |             |             |             |             |             |
| AMN1        | AMN1        | 321.8785603 | 330.1260718 | 374.6602058 |             |
| 463.8995219 |             |             |             |             |             |
| TMEM169     | TMEM169     | 200.0022122 | 192.7936259 | 79.16926967 |             |
| 121.614251  |             |             |             |             |             |

|                             |             |               |               |
|-----------------------------|-------------|---------------|---------------|
| PROSER2 PROSER2             | 34.37538023 | 58.10218863   | 146.0728779   |
| 134.3641321                 |             |               |               |
| MCM9 MCM9                   | 2020.855686 | 2366.343683   | 2146.490762   |
| 2181.210437                 |             |               |               |
| RGPD3 RGPD3                 | 17.70852921 | 21.12806859   | 18.95602232   |
| 15.69216142                 |             |               |               |
| AKAP6 AKAP6                 | 7.291747321 | 36.97412004   | 22.30120273   |
| 63.74940576                 |             |               |               |
| C6orf120 C6orf120           |             | 2178.149093   | 1789.723477   |
| 2169.907025                 | 1723.195476 |               |               |
| CDC20B CDC20B               | 3.125034566 | 5.282017149   | 0 2.942280266 |
| ZSCAN12 ZSCAN12             | 315.6284912 | 375.0232176   | 521.8481438   |
| 459.9764816                 |             |               |               |
| DCP1A DCP1A                 | 5269.849957 | 3535.430145   | 6850.929477   |
| 5512.852458                 |             |               |               |
| IL26 IL26                   | 137.5015209 | 258.8188403   | 131.5770961   |
| 162.8061747                 |             |               |               |
| RPS27A RPS27A               | 24666.93951 | 26610.80239   | 31664.36269   |
| 26853.21123                 |             |               |               |
| ZMYM5 ZMYM5                 | 1207.305021 | 912.9086305   | 1349.222765   |
| 984.683129                  |             |               |               |
| TRIM38 TRIM38               | 4538.591868 | 3687.728306   | 5646.66453    |
| 4313.38287                  |             |               |               |
| FST FST                     | 19.79188559 | 7.923025723   | 25.64638313   |
| 18.63444168                 |             |               |               |
| RABGGTA RABGGTA             | 3471.913403 | 1985.158112   | 2104.118477   |
| 2489.169105                 |             |               |               |
| LRRC58 LRRC58               | 4168.796111 | 4983.58318    | 4219.387556   |
| 3934.809476                 |             |               |               |
| C1QBP C1QBP                 | 24137.76699 | 15684.94992   | 20759.07456   |
| 20400.7906                  |             |               |               |
| TAF4 TAF4                   | 85.41761147 | 271.143547    | 136.0373366   |
| 158.8831344                 |             |               |               |
| BUB1B BUB1B                 | 7160.495869 | 7750.479829   | 3612.794842   |
| 5843.368608                 |             |               |               |
| BCL2L2-PABPN1 BCL2L2-PABPN1 |             | 5581.311735   | 7951.196481   |
| 6778.450568                 | 6374.940576 |               |               |
| IP6K1 IP6K1                 | 2884.406905 | 3396.337027   | 4059.933956   |
| 2989.35675                  |             |               |               |
| TRIM50 TRIM50               | 0 0         | 2.230120273   | 0             |
| OR2A20P OR2A20P             | 5.208390943 | 0 0           | 0             |
| PAX5 PAX5                   | 2.083356377 | 22.88874098   | 0 1.961520177 |
| RSF1 RSF1                   | 947.9271517 | 1133.873015   | 1644.713701   |
| 1325.00688                  |             |               |               |
| ZSWIM3 ZSWIM3               | 486.4637141 | 515.8770082   | 516.2728431   |
| 481.5532035                 |             |               |               |
| TMC2 TMC2                   | 0 0         | 0 1.961520177 |               |
| ZNF280D ZNF280D             | 485.4220359 | 698.986936    | 500.6620012   |
| 512.9375264                 |             |               |               |
| ST8SIA6 ST8SIA6             | 92.70935879 | 44.89714576   | 15.61084191   |

|                 |               |             |             |  |   |
|-----------------|---------------|-------------|-------------|--|---|
| 10.78836098     |               |             |             |  |   |
| SAR1B SAR1B     | 5992.77462    | 5059.292092 | 5709.107898 |  |   |
| 4402.632038     |               |             |             |  |   |
| TEN1 TEN1       | 861.4678621   | 536.1247406 | 586.5216317 |  |   |
| 413.8807574     |               |             |             |  |   |
| REC8 REC8       | 426.0463792   | 562.5348263 | 367.969845  |  |   |
| 568.8408514     |               |             |             |  |   |
| FXYD4 FXYD4     | 0 1.760672383 | 0           | 0.980760089 |  |   |
| TLDC2 TLDC2     | 3585.456326   | 1746.587004 | 2153.181123 |  |   |
| 1280.872676     |               |             |             |  |   |
| CDC6 CDC6       | 7345.914587   | 5576.929773 | 4330.893569 |  |   |
| 4520.323249     |               |             |             |  |   |
| MPHOSPH8        | MPHOSPH8      | 1709.393908 | 1821.41558  |  |   |
| 2269.147377     | 2043.904025   |             |             |  |   |
| MARK4 MARK4     | 53.12558762   | 104.7600068 | 26.76144327 |  |   |
| 52.96104479     |               |             |             |  |   |
| STK31 STK31     | 0 0.880336191 | 6.690360818 | 0           |  |   |
| SEPSECS SEPSECS | 998.969383    | 1131.232006 | 759.3559528 |  |   |
| 902.2992816     |               |             |             |  |   |
| RAB8B RAB8B     | 6787.575078   | 6570.829333 | 9773.502094 |  |   |
| 8805.264076     |               |             |             |  |   |
| CNPY4 CNPY4     | 646.8821552   | 676.9785312 | 452.7144153 |  |   |
| 790.4926315     |               |             |             |  |   |
| EGLN3 EGLN3     | 331.253664    | 80.11059342 | 386.9258673 |  |   |
| 96.11448869     |               |             |             |  |   |
| DIAPH2 DIAPH2   | 580.2147511   | 749.1660989 | 664.5758412 |  |   |
| 705.1665038     |               |             |             |  |   |
| CGB2 CGB2       | 0 0.880336191 | 0           | 0.980760089 |  |   |
| PARP16 PARP16   | 941.6770826   | 1225.427978 | 1248.867353 |  |   |
| 1384.833245     |               |             |             |  |   |
| FNDC4 FNDC4     | 2.083356377   | 11.44437049 | 4.460240545 |  |   |
| 3.923040355     |               |             |             |  |   |
| WHSC1L1 WHSC1L1 | 8353.217395   | 7145.688866 | 7716.216143 |  |   |
| 6131.712074     |               |             |             |  |   |
| STPG1 STPG1     | 448.9632993   | 413.75801   | 553.0698276 |  |   |
| 422.7075982     |               |             |             |  |   |
| USH2A USH2A     | 0 0           | 2.230120273 | 0           |  |   |
| MT1L MT1L       | 211.4606723   | 421.6810357 | 136.0373366 |  |   |
| 206.9403787     |               |             |             |  |   |
| SLC04A1-AS1     | SLC04A1-AS1   | 1569.80903  | 957.8057763 |  |   |
| 440.4487538     | 740.4738669   |             |             |  |   |
| DDX6 DDX6       | 5960.482596   | 5346.281691 | 7546.727002 |  |   |
| 5923.790936     |               |             |             |  |   |
| LHX8 LHX8       | 1.041678189   | 0 0         | 0           |  |   |
| TDRP TDRP       | 1.041678189   | 0 0         | 1.961520177 |  |   |
| NMB NMB         | 266.6696163   | 193.6739621 | 194.0204637 |  |   |
| 233.4209011     |               |             |             |  |   |
| IRX3 IRX3       | 5.208390943   | 1.760672383 | 1.115060136 |  | 0 |
| TMEM43 TMEM43   | 5799.022476   | 3509.020059 | 5820.613911 |  |   |
| 5456.949133     |               |             |             |  |   |



|              |              |             |               |               |
|--------------|--------------|-------------|---------------|---------------|
| RPS6KA2      | RPS6KA2      | 128.1264172 | 158.4605145   | 811.7637792   |
| 413.8807574  |              |             |               |               |
| ERLIN1       | ERLIN1       | 2350.025994 | 1878.637433   | 2766.464198   |
| 2372.458654  |              |             |               |               |
| RASSF8-AS1   | RASSF8-AS1   | 0           | 4.401680957   | 2.230120273   |
| 0            |              |             |               |               |
| TVP23C-CDRT4 | TVP23C-CDRT4 | 377.0875043 | 539.6460854   |               |
| 391.3861078  | 356.0159122  |             |               |               |
| PET100       | PET100       | 2678.154623 | 3094.381713   | 2441.981698   |
| 2293.997847  |              |             |               |               |
| CCNB3        | CCNB3        | 33.33370204 | 36.97412004   | 0 50.01876452 |
| C8orf33      | C8orf33      | 3742.749732 | 2625.162523   | 4579.55198    |
| 3902.444393  |              |             |               |               |
| ANKRD36      | ANKRD36      | 2056.272744 | 2026.533913   | 1472.99444    |
| 2145.903074  |              |             |               |               |
| MY01B        | MY01B        | 97.91774974 | 120.6060582   | 1068.227611   |
| 436.4382395  |              |             |               |               |
| BCAR3        | BCAR3        | 116.6679571 | 107.4010154   | 36.7969845    |
| 50.99952461  |              |             |               |               |
| UNC13D       | UNC13D       | 7846.961795 | 8085.007582   | 4383.301396   |
| 6843.743899  |              |             |               |               |
| MOB3B        | MOB3B        | 21.87524196 | 58.98252483   | 63.55842777   |
| 98.07600887  |              |             |               |               |
| MY018B       | MY018B       | 16.66685102 | 237.6907717   | 4.460240545   |
| 13.73064124  |              |             |               |               |
| PAQR6        | PAQR6        | 37.50041479 | 73.94824008   | 24.531323     |
| 46.09572417  |              |             |               |               |
| ITGBL1       | ITGBL1       | 0 0         | 2.230120273   | 0             |
| ZNF416       | ZNF416       | 446.879943  | 349.493468    | 1025.855325   |
| 468.8033224  |              |             |               |               |
| C2orf42      | C2orf42      | 1694.810413 | 1335.470002   | 1922.363675   |
| 1641.792388  |              |             |               |               |
| HRASLS2      | HRASLS2      | 8.33342551  | 15.84605145   | 11.15060136   |
| 1.961520177  |              |             |               |               |
| IMPA2        | IMPA2        | 619.7985223 | 967.4894744   | 535.2288654   |
| 741.454627   |              |             |               |               |
| SLC5A4       | SLC5A4       | 0 0         | 0 4.903800443 |               |
| IQGAP3       | IQGAP3       | 66.66740408 | 705.1492893   | 2.230120273   |
| 356.0159122  |              |             |               |               |
| GFRA1        | GFRA1        | 1.041678189 | 10.5640343    | 0 0           |
| SOX13        | SOX13        | 5.208390943 | 36.97412004   | 0 35.30736319 |
| ITPKB        | ITPKB        | 1310.431161 | 2188.515772   | 2960.484662   |
| 2229.267682  |              |             |               |               |
| CDC34        | CDC34        | 3447.954805 | 2723.760176   | 2530.071449   |
| 2552.918511  |              |             |               |               |
| GNPNAT1      | GNPNAT1      | 2842.739777 | 2221.968547   | 2532.301569   |
| 2056.653906  |              |             |               |               |
| SLC10A6      | SLC10A6      | 0 0         | 6.690360818   | 0             |
| KCNG3        | KCNG3        | 3.125034566 | 6.16235334    | 0 5.884560532 |
| TRIM44       | TRIM44       | 2413.568363 | 2065.268705   | 6052.54642    |

|                 |               |               |             |   |
|-----------------|---------------|---------------|-------------|---|
| 5073.471939     |               |               |             |   |
| CBLN3 CBLN3     | 15.62517283   | 73.94824008   | 26.76144327 |   |
| 48.05724434     |               |               |             |   |
| POLR2I POLR2I   | 3053.158771   | 2642.769247   | 2783.1901   |   |
| 2627.456278     |               |               |             |   |
| HAPLN3 HAPLN3   | 4037.544659   | 3076.774989   | 5272.004324 |   |
| 4274.152466     |               |               |             |   |
| HOXC5 HOXC5     | 0 0           | 2.230120273   | 0           |   |
| BBS5 BBS5       | 116.6679571   | 100.3583258   | 218.5517867 |   |
| 198.1135379     |               |               |             |   |
| B3GNT8 B3GNT8   | 26.04195472   | 28.17075813   | 18.95602232 |   |
| 24.51900222     |               |               |             |   |
| DRAXIN DRAXIN   | 4.166712755   | 12.32470668   | 24.531323   |   |
| 6.865320621     |               |               |             |   |
| RCOR2 RCOR2     | 0 2.641008574 | 0             | 0           |   |
| AP2M1 AP2M1     | 22530.45754   | 17003.69354   | 16214.08944 |   |
| 16952.43813     |               |               |             |   |
| C12orf43        | C12orf43      | 1658.351676   | 1375.085131 |   |
| 1512.021545     | 1594.715904   |               |             |   |
| SRRM2-AS1       | SRRM2-AS1     | 39.58377117   | 66.90555055 |   |
| 35.68192436     | 26.48052239   |               |             |   |
| LINC00310       | LINC00310     | 9.375103698   | 22.00840479 | 0 |
| 7.846080709     |               |               |             |   |
| NPIP6 NPIP6     | 4.166712755   | 0 5.575300681 | 0.980760089 |   |
| PTK2 PTK2       | 62.50069132   | 68.66622293   | 829.6047414 |   |
| 779.7042705     |               |               |             |   |
| ULK2 ULK2       | 884.3847822   | 1628.621954   | 1152.972181 |   |
| 1299.507117     |               |               |             |   |
| CCT6B CCT6B     | 71.87579502   | 61.6235334    | 43.48734531 |   |
| 51.9802847      |               |               |             |   |
| GIMAP1-GIMAP5   | GIMAP1-GIMAP5 | 10641.78438   | 9218.000261 |   |
| 12737.33194     | 12565.49826   |               |             |   |
| PDXK PDXK       | 6242.777385   | 5723.945917   | 4483.656808 |   |
| 4705.686905     |               |               |             |   |
| ARF4 ARF4       | 11808.46395   | 9330.683293   | 11618.92662 |   |
| 9479.046257     |               |               |             |   |
| MAPKAPK5        | MAPKAPK5      | 3858.376011   | 2978.177336 |   |
| 3490.138227     | 3678.831093   |               |             |   |
| BLZF1 BLZF1     | 2208.35776    | 1790.603813   | 1455.153478 |   |
| 1335.795241     |               |               |             |   |
| PARP3 PARP3     | 522.9224507   | 537.0050768   | 879.7824475 |   |
| 759.1083086     |               |               |             |   |
| SMYD2 SMYD2     | 2048.980997   | 1649.750023   | 1869.955849 |   |
| 2174.345117     |               |               |             |   |
| CRYAB CRYAB     | 0 0           | 0 0.980760089 |             |   |
| SPIN2A SPIN2A   | 0 0.880336191 | 0             | 3.923040355 |   |
| RUNDC3B RUNDC3B | 8.33342551    | 16.72638764   | 59.09818722 |   |
| 36.28812328     |               |               |             |   |
| GATS GATS       | 367.7124006   | 784.3795466   | 537.4589857 |   |
| 604.1482146     |               |               |             |   |

|             |             |             |             |             |             |             |
|-------------|-------------|-------------|-------------|-------------|-------------|-------------|
| PRSS54      | PRSS54      | 7.291747321 | 4.401680957 | 10.03554123 |             |             |
| 16.67292151 |             |             |             |             |             |             |
| SOCS2       | SOCS2       | 1798.978232 | 622.3976873 | 2063.976312 |             |             |
| 563.937051  |             |             |             |             |             |             |
| RACGAP1     | RACGAP1     | 5910.482043 | 13564.22004 | 6492.995173 |             |             |
| 7897.080234 |             |             |             |             |             |             |
| GTF2H1      | GTF2H1      | 6005.274758 | 3755.514193 | 6507.490955 |             |             |
| 4936.165526 |             |             |             |             |             |             |
| PENK        | PENK        | 0           | 2.641008574 | 0           |             |             |
| NRXN1       | NRXN1       | 0           | 0           | 5.575300681 | 0.980760089 |             |
| CHORDC1     | CHORDC1     | 7277.163826 | 4923.720319 | 7788.695052 |             |             |
| 6311.191171 |             |             |             |             |             |             |
| TBL1X       | TBL1X       | 2505.236044 | 2958.809939 | 2573.558795 |             |             |
| 2937.376466 |             |             |             |             |             |             |
| ELP2        | ELP2        | 4886.512383 | 3711.497383 | 4936.371223 |             |             |
| 5091.12562  |             |             |             |             |             |             |
| DPP3        | DPP3        | 8929.265434 | 9517.314566 | 4867.237495 |             |             |
| 6611.303758 |             |             |             |             |             |             |
| ESPNP       | ESPNP       | 0           | 0           | 5.575300681 | 6.865320621 |             |
| FBXL19-AS1  | FBXL19-AS1  |             |             | 140.6265555 | 174.3065659 |             |
| 80.28432981 | 203.9980984 |             |             |             |             |             |
| MIR4697HG   | MIR4697HG   |             | 10.41678189 | 57.22185244 |             |             |
| 49.062646   | 12.74988115 |             |             |             |             |             |
| LRR37BP1    | LRR37BP1    |             | 97.91774974 | 203.3576602 |             |             |
| 102.5855325 | 113.7681703 |             |             |             |             |             |
| MIR4650-1   | MIR4650-1   |             | 2.083356377 | 0           | 0           | 0           |
| MIR4658     | MIR4658     | 28.12531109 | 63.38420578 | 35.68192436 |             |             |
| 23.53824213 |             |             |             |             |             |             |
| MIR4649     | MIR4649     | 0           | 1.760672383 | 1.115060136 | 6.865320621 |             |
| TNFSF18     | TNFSF18     | 0           | 0           | 0           | 0.980760089 |             |
| ADRBK1      | ADRBK1      | 17323.10828 | 19653.50547 | 11101.53872 |             |             |
| 15334.18399 |             |             |             |             |             |             |
| C15orf53    | C15orf53    |             | 826.0508036 | 436.646751  |             |             |
| 110.3909535 | 118.6719707 |             |             |             |             |             |
| KLRC1       | KLRC1       | 19.79188559 | 6.16235334  | 28.99156354 |             |             |
| 2.942280266 |             |             |             |             |             |             |
| SPG7        | SPG7        | 3411.496068 | 3145.441212 | 2095.197996 |             |             |
| 2793.204733 |             |             |             |             |             |             |
| SPI1        | SPI1        | 0           | 0           | 3.345180409 | 0           |             |
| SPARC       | SPARC       | 14.58349464 | 24.64941336 | 0           | 24.51900222 |             |
| OSBPL6      | OSBPL6      | 85.41761147 | 63.38420578 | 40.14216491 |             |             |
| 55.90332505 |             |             |             |             |             |             |
| OMG         | OMG         | 10.41678189 | 14.96571525 | 0           | 10.78836098 |             |
| REST        | REST        | 5390.684627 | 5858.637354 | 6020.209676 |             |             |
| 5962.040579 |             |             |             |             |             |             |
| IGFBP5      | IGFBP5      | 0           | 0.880336191 | 1.115060136 | 0           |             |
| KLHDC1      | KLHDC1      | 36.4587366  | 55.46118006 | 146.0728779 |             |             |
| 129.4603317 |             |             |             |             |             |             |
| AQP4-AS1    | AQP4-AS1    |             | 0           | 0           | 0           | 1.961520177 |
| FDFT1       | FDFT1       | 11908.46505 | 12468.20148 | 12412.84944 |             |             |

|             |            |               |               |               |
|-------------|------------|---------------|---------------|---------------|
| 15209.62746 |            |               |               |               |
| ZNF726      | ZNF726     | 154.1683719   | 188.391945    | 171.719261    |
| 142.2102129 |            |               |               |               |
| CRISPLD2    | CRISPLD2   |               | 3.125034566   | 5.282017149   |
| 30.10662368 |            | 16.67292151   |               |               |
| LTF         | LTF        | 4.166712755   | 0.880336191   | 0 2.942280266 |
| SIT1        | SIT1       | 7636.542801   | 7347.285854   | 3061.955134   |
| 4324.171231 |            |               |               |               |
| ATL3        | ATL3       | 3159.409946   | 3852.351174   | 4366.575494   |
| 3721.003776 |            |               |               |               |
| AJAP1       | AJAP1      | 2.083356377   | 0 0           | 0.980760089   |
| ZNF534      | ZNF534     | 0 8.803361914 | 6.690360818   | 4.903800443   |
| BRD4        | BRD4       | 2288.566981   | 3146.321548   | 3232.559335   |
| 2535.264829 |            |               |               |               |
| C19orf24    | C19orf24   |               | 1672.935171   | 1530.024301   |
| 1500.870943 |            | 1430.928969   |               |               |
| ADAM28      | ADAM28     | 0 0           | 39.02710477   | 4.903800443   |
| PLK4        | PLK4       | 5016.722157   | 5545.23767    | 2243.500994   |
| 3175.701167 |            |               |               |               |
| TINF2       | TINF2      | 7365.706472   | 5469.528757   | 8200.152242   |
| 7116.395203 |            |               |               |               |
| HIST1H2BD   | HIST1H2BD  |               | 160.4184411   | 134.6914373   |
| 194.0204637 |            | 113.7681703   |               |               |
| IGDCC4      | IGDCC4     | 11.45846008   | 0 4.460240545 | 13.73064124   |
| PPT2-EGFL8  | PPT2-EGFL8 |               | 0 0           | 0 0.980760089 |
| NFAM1       | NFAM1      | 13.54181645   | 13.20504287   | 0 9.807600887 |
| GJC1        | GJC1       | 42.70880574   | 148.7768164   | 20.07108245   |
| 62.76864567 |            |               |               |               |
| TUB         | TUB        | 7.291747321   | 3.521344766   | 45.71746559   |
| 18.63444168 |            |               |               |               |
| PHF14       | PHF14      | 498.9638524   | 1021.189982   | 631.1240371   |
| 663.97458   |            |               |               |               |
| SAMD9       | SAMD9      | 5081.306204   | 3976.478577   | 7833.297457   |
| 4100.557931 |            |               |               |               |
| TAS2R5      | TAS2R5     | 6.250069132   | 4.401680957   | 11.15060136   |
| 3.923040355 |            |               |               |               |
| FREM3       | FREM3      | 2.083356377   | 0.880336191   | 0 5.884560532 |
| ORC3        | ORC3       | 4155.254295   | 3413.063414   | 4544.985115   |
| 4632.129899 |            |               |               |               |
| ARHGAP33    | ARHGAP33   |               | 38.54209298   | 144.3751354   |
| 22.30120273 |            | 41.19192372   |               |               |
| TTLL12      | TTLL12     | 8081.339388   | 5911.457526   | 6346.922296   |
| 7171.317768 |            |               |               |               |
| CYP19A1     | CYP19A1    | 5.208390943   | 14.96571525   | 0 4.903800443 |
| EFR3A       | EFR3A      | 6265.694305   | 6208.130822   | 6691.475878   |
| 5074.452699 |            |               |               |               |
| LSM8        | LSM8       | 2838.573064   | 3522.225102   | 2689.525049   |
| 2504.861266 |            |               |               |               |
| COR02B      | COR02B     | 6.250069132   | 0.880336191   | 0 8.826840798 |
| EGR3        | EGR3       | 151.0433374   | 302.8356499   | 210.7463658   |

|             |             |             |             |             |             |
|-------------|-------------|-------------|-------------|-------------|-------------|
| 546.2833694 |             |             |             |             |             |
| LOC285847   | LOC285847   |             | 2.083356377 | 19.36739621 | 0           |
|             | 7.846080709 |             |             |             |             |
| ARPC3       | ARPC3       | 31162.84469 | 28894.39448 | 18234.57841 |             |
| 19226.82078 |             |             |             |             |             |
| SMARCD3     | SMARCD3     | 38.54209298 | 82.751602   | 128.2319157 |             |
| 225.5748204 |             |             |             |             |             |
| COX19       | COX19       | 1746.894322 | 1290.572857 | 2256.881716 |             |
| 1634.927068 |             |             |             |             |             |
| MKI67       | MKI67       | 12713.68229 | 29115.35886 | 5792.737408 |             |
| 12636.11298 |             |             |             |             |             |
| PTPLA       | PTPLA       | 207.2939596 | 178.7082469 | 118.1963744 |             |
| 140.2486927 |             |             |             |             |             |
| SSU72       | SSU72       | 9229.268752 | 8165.118176 | 8529.094982 |             |
| 8199.154341 |             |             |             |             |             |
| DNAJC28     | DNAJC28     | 17.70852921 | 15.84605145 | 49.062646   |             |
| 44.13420399 |             |             |             |             |             |
| SDCBP       | SDCBP       | 13593.90036 | 12959.42907 | 14486.86129 |             |
| 13353.04861 |             |             |             |             |             |
| URM1        | URM1        | 4353.173151 | 4046.025136 | 3048.574413 |             |
| 3209.04701  |             |             |             |             |             |
| WDR26       | WDR26       | 587.5064984 | 1210.462263 | 692.4523446 |             |
| 719.8779051 |             |             |             |             |             |
| NRGN        | NRGN        | 21.87524196 | 120.6060582 | 36.7969845  |             |
| 32.36508293 |             |             |             |             |             |
| C10orf71    | C10orf71    |             | 0           | 2.641008574 | 0           |
| ZDHHC3      | ZDHHC3      | 4622.967801 | 3927.17975  | 2805.491303 | 0           |
| 3146.278364 |             |             |             |             |             |
| ANP32A-IT1  | ANP32A-IT1  |             | 32.29202385 | 23.76907717 |             |
| 50.17770613 | 19.61520177 |             |             |             |             |
| LINC00520   | LINC00520   |             | 0           | 0.880336191 | 0           |
| 0.980760089 |             |             |             |             |             |
| LINC00271   | LINC00271   |             | 63.54236951 | 53.70050768 |             |
| 25.64638313 | 39.23040355 |             |             |             |             |
| LINC00202-1 | LINC00202-1 |             | 0           | 0           | 1.115060136 |
| 0.980760089 |             |             |             |             |             |
| KLF3-AS1    | KLF3-AS1    |             | 243.7526962 | 336.2884251 |             |
| 228.5873279 | 183.4021366 |             |             |             |             |
| LINC00264   | LINC00264   |             | 4.166712755 | 4.401680957 | 0           |
| 0           |             |             |             |             |             |
| LOC284798   | LOC284798   |             | 0           | 1.760672383 | 0           |
| 1.961520177 |             |             |             |             |             |
| H1FX-AS1    | H1FX-AS1    |             | 103.1261407 | 279.9469089 |             |
| 149.4180583 | 170.6522554 |             |             |             |             |
| LINC00486   | LINC00486   |             | 0           | 0           | 7.805420954 |
| 1.961520177 |             |             |             |             |             |
| KLF14       | KLF14       | 0           | 0           | 0.980760089 |             |
| TMC1        | TMC1        | 0           | 0           | 1.961520177 |             |
| SEPN1       | SEPN1       | 139.5848773 | 243.853125  | 612.1680148 |             |
| 639.4555778 |             |             |             |             |             |

|             |           |             |             |             |
|-------------|-----------|-------------|-------------|-------------|
| CNOT7       | CNOT7     | 9579.272623 | 9468.896075 | 9822.56474  |
| 9712.467158 |           |             |             |             |
| MPI         | MPI       | 2466.693951 | 2476.385707 | 2159.871484 |
| 3134.509243 |           |             |             |             |
| EFNA3       | EFNA3     | 15.62517283 | 84.51227438 | 61.32830749 |
| 83.36460754 |           |             |             |             |
| ITPR3       | ITPR3     | 1204.179986 | 3541.592498 | 1181.963744 |
| 1711.426355 |           |             |             |             |
| COX6A1      | COX6A1    | 21765.86575 | 19314.57604 | 17924.59169 |
| 17893.96782 |           |             |             |             |
| ACSM2B      | ACSM2B    | 0           | 3.521344766 | 3.345180409 |
| 228.1275233 |           |             |             | 2.942280266 |
| TMPPE       | TMPPE     | 247.1515423 | 326.604727  | 243.0831097 |
|             |           |             |             |             |
| CASR        | CASR      | 0           | 0           | 18.95602232 |
| 6.865320621 |           |             |             |             |
| ANKRD50     | ANKRD50   | 7.291747321 | 50.17916291 | 0           |
| 30.40356275 |           |             |             |             |
| PCDHGA1     | PCDHGA1   | 4.166712755 | 7.923025723 | 45.71746559 |
| 10.78836098 |           |             |             |             |
| EIF4H       | EIF4H     | 27460.72041 | 19642.94144 | 21222.93957 |
| 22335.83026 |           |             |             |             |
| ZFP91       | ZFP91     | 2942.740883 | 3114.629445 | 2352.776888 |
| 2165.518276 |           |             |             |             |
| ROB03       | ROB03     | 22.91692015 | 36.97412004 | 83.62951022 |
| 101.0182891 |           |             |             |             |
| RNF157      | RNF157    | 2500.027653 | 2785.38371  | 1675.935385 |
| 1414.256048 |           |             |             |             |
| MRPS30      | MRPS30    | 3685.457432 | 2766.016314 | 3055.264773 |
| 2993.279791 |           |             |             |             |
| TNFRSF12A   | TNFRSF12A |             | 244.7943743 | 186.6312726 |
| 218.5517867 |           |             |             |             |
| 291.2857463 |           |             |             |             |
| FLT3LG      | FLT3LG    | 2227.107967 | 938.4383801 | 1925.708855 |
| 832.6653153 |           |             |             |             |
| NDUFAB1     | NDUFAB1   | 10245.94666 | 9844.799629 | 7870.094442 |
| 7707.793537 |           |             |             |             |
| NDUFA9      | NDUFA9    | 15602.25591 | 11045.57819 | 9501.427421 |
| 9857.619651 |           |             |             |             |
| FYB         | FYB       | 5816.731006 | 9102.676219 | 8157.779957 |
| 8202.096622 |           |             |             |             |
| BMP8B       | BMP8B     | 92.70935879 | 84.51227438 | 154.9933589 |
| 171.6330155 |           |             |             |             |
| BICD1       | BICD1     | 378.1291825 | 319.5620375 | 383.5806869 |
| 438.3997596 |           |             |             |             |
| PVALB       | PVALB     | 1.041678189 | 0           | 0           |
| 0.980760089 |           |             |             |             |
| MAPK13      | MAPK13    | 1931.271362 | 1717.535909 | 2460.937721 |
| 2664.725161 |           |             |             |             |
| 4-Mar       | 4-Mar     | 0           | 0           | 4.903800443 |
| 0           |           |             |             |             |
| ATG4C       | ATG4C     | 1382.306956 | 934.9170353 | 1398.285411 |
| 1150.431584 |           |             |             |             |
| MCEE        | MCEE      | 592.7148894 | 537.0050768 | 492.8565802 |
| 523.7258873 |           |             |             |             |
| JPH3        | JPH3      | 2.083356377 | 7.042689532 | 3.345180409 |

|              |              |             |             |             |
|--------------|--------------|-------------|-------------|-------------|
| 4.903800443  |              |             |             |             |
| SOSTDC1      | SOSTDC1      | 2.083356377 | 0           | 0           |
| WWC2         | WWC2         | 1.041678189 | 3.521344766 | 383.5806869 |
| 266.7667441  |              |             |             |             |
| TMTC2        | TMTC2        | 7.291747321 | 29.93143051 | 17.84096218 |
| 17.6536816   |              |             |             |             |
| USP54        | USP54        | 272.9196854 | 311.6390118 | 408.1120099 |
| 240.2862217  |              |             |             |             |
| TNFAIP8L1    | TNFAIP8L1    |             | 1198.971595 | 1641.826997 |
| 1120.635437  |              | 1328.92992  |             |             |
| WDR76        | WDR76        | 3208.368821 | 4828.64401  | 2627.081681 |
| 3872.04083   |              |             |             |             |
| POU2F3       | POU2F3       | 0           | 0.880336191 | 0           |
| VANGL2       | VANGL2       | 0           | 1.760672383 | 0           |
| GALM         | GALM         | 16931.43728 | 14008.78981 | 7809.881194 |
| 11051.20468  |              |             |             |             |
| LRRC37B      | LRRC37B      | 283.3364673 | 379.4248985 | 422.6077916 |
| 291.2857463  |              |             |             |             |
| SLC2A13      | SLC2A13      | 115.6262789 | 166.3835402 | 158.3385393 |
| 279.5166253  |              |             |             |             |
| MSC          | MSC          | 673.9657881 | 1325.786304 | 585.4065715 |
| 983.7023689  |              |             |             |             |
| POLR3G       | POLR3G       | 829.1758382 | 997.4209049 | 762.7011332 |
| 968.0102075  |              |             |             |             |
| IGF2BP1      | IGF2BP1      | 0           | 1.760672383 | 0           |
| CCBL2        | CCBL2        | 2503.152687 | 2137.456273 | 1966.96608  |
| 2697.090244  |              |             |             |             |
| SLC44A2      | SLC44A2      | 12281.38584 | 11392.43065 | 11160.6369  |
| 10847.20658  |              |             |             |             |
| ECT2L        | ECT2L        | 6.250069132 | 10.5640343  | 47.94758586 |
| 15.69216142  |              |             |             |             |
| ZNF384       | ZNF384       | 3056.283806 | 3883.16294  | 3753.292419 |
| 3506.217317  |              |             |             |             |
| GS1-259H13.2 | GS1-259H13.2 |             | 56.25062219 | 34.33311147 |
| 76.9391494   |              | 39.23040355 |             |             |
| CCDC149      | CCDC149      | 0           | 6.16235334  | 0           |
| ABHD14B      | ABHD14B      | 2028.147433 | 2180.592746 | 2065.091372 |
| 2787.320172  |              |             |             |             |
| C4orf51      | C4orf51      | 0           | 0.880336191 | 0           |
| FAM186A      | FAM186A      | 3.125034566 | 1.760672383 | 6.690360818 |
| 0.980760089  |              |             |             |             |
| CEP170B      | CEP170B      | 10.41678189 | 38.73479242 | 16.72590204 |
| 24.51900222  |              |             |             |             |
| MCC          | MCC          | 430.2130919 | 533.483732  | 254.2337111 |
| 358.9581925  |              |             |             |             |
| MC1R         | MC1R         | 11.45846008 | 69.54655912 | 1.115060136 |
| 31.38432284  |              |             |             |             |
| NRP1         | NRP1         | 138.5431991 | 111.8026963 | 69.13372845 |
| 40.21116364  |              |             |             |             |
| COX20        | COX20        | 3085.450795 | 2475.50537  | 2537.87687  |

|                 |                |  |                     |  |               |
|-----------------|----------------|--|---------------------|--|---------------|
| 2566.649152     |                |  |                     |  |               |
| SLC25A32        | SLC25A32       |  | 6230.277247         |  | 5321.632277   |
| 6096.033765     | 5996.367182    |  |                     |  |               |
| TCEAL1 TCEAL1   | 163.5434756    |  | 209.5200136         |  | 266.4993726   |
| 387.400235      |                |  |                     |  |               |
| ACOX3 ACOX3     | 1591.684272    |  | 1390.931182         |  | 1034.775806   |
| 1601.581225     |                |  |                     |  |               |
| ACOX2 ACOX2     | 0 0            |  | 1.115060136         |  | 0             |
| SLC8B1 SLC8B1   | 1839.603681    |  | 1621.579265         |  | 2642.692523   |
| 2452.880982     |                |  |                     |  |               |
| NRSN2 NRSN2     | 311.4617784    |  | 357.4164937         |  | 179.5246819   |
| 436.4382395     |                |  |                     |  |               |
| MRPL37 MRPL37   | 14701.20428    |  | 9615.031883         |  | 8602.688951   |
| 9341.739845     |                |  |                     |  |               |
| RBM3 RBM3       | 18065.82483    |  | 13059.7874          |  | 12644.78195   |
| 11762.25574     |                |  |                     |  |               |
| PPP1R1A PPP1R1A | 1.041678189    |  | 1.760672383         |  | 0 0           |
| PLD6 PLD6       | 1672.935171    |  | 845.1227438         |  | 1426.161914   |
| 1262.238234     |                |  |                     |  |               |
| FTSJ2 FTSJ2     | 4450.049222    |  | 3124.313143         |  | 3284.967161   |
| 3670.004252     |                |  |                     |  |               |
| PSMC5 PSMC5     | 18366.86982    |  | 12925.09596         |  | 11544.21759   |
| 12723.40063     |                |  |                     |  |               |
| CR1 CR1         | 0 0            |  | 0 3.923040355       |  |               |
| MIR602 MIR602   | 1.041678189    |  | 0 0                 |  | 0.980760089   |
| MIR601 MIR601   | 0 0            |  | 0 1.961520177       |  |               |
| MIR600 MIR600   | 0 0            |  | 1.115060136         |  | 2.942280266   |
| MIR599 MIR599   | 0 0.880336191  |  | 0 0                 |  |               |
| MIR597 MIR597   | 1.041678189    |  | 0 1.115060136       |  | 0.980760089   |
| MIR593 MIR593   | 0 1.760672383  |  | 3.345180409         |  | 2.942280266   |
| MIR550A2        | MIR550A2       |  | 0 0.880336191       |  | 0             |
| 0.980760089     |                |  |                     |  |               |
| MIR550A1        | MIR550A1       |  | 0 1.760672383       |  | 0 0           |
| YDJC YDJC       | 2587.528621    |  | 2019.491223         |  | 2629.311801   |
| 2492.111385     |                |  |                     |  |               |
| GPATCH8 GPATCH8 | 3100.03429     |  | 3901.65 4135.758045 |  | 3652.35057    |
| LOC100129518    | LOC100129518   |  | 858.3428275         |  | 635.6027302   |
| 547.4945269     | 762.0505889    |  |                     |  |               |
| KCNC4 KCNC4     | 47.91719668    |  | 200.7166516         |  | 168.3740806   |
| 252.0553428     |                |  |                     |  |               |
| RAB6C-AS1       | RAB6C-AS1      |  | 0 0                 |  | 0 3.923040355 |
| SNHG4 SNHG4     | 87.50096785    |  | 172.5458935         |  | 156.1084191   |
| 149.0755335     |                |  |                     |  |               |
| ANGPT2 ANGPT2   | 133.3348082    |  | 102.9993344         |  | 130.4620359   |
| 122.5950111     |                |  |                     |  |               |
| LCN15 LCN15     | 0 0            |  | 0 0.980760089       |  |               |
| SPACA5 SPACA5   | 0 0            |  | 4.460240545         |  | 0             |
| C7orf55-LUC7L2  | C7orf55-LUC7L2 |  | 10839.70323         |  | 10278.80537   |
| 10681.16105     | 10351.92274    |  |                     |  |               |
| HYLS1 HYLS1     | 1496.891557    |  | 971.0108192         |  | 829.6047414   |



|              |              |             |             |             |             |
|--------------|--------------|-------------|-------------|-------------|-------------|
| 815.0116337  |              |             |             |             |             |
| CCNY         | CCNY         | 1861.478923 | 1446.392363 | 2194.438348 |             |
| 1788.906402  |              |             |             |             |             |
| OSBPL7       | OSBPL7       | 493.7554614 | 779.0975294 | 301.0662368 |             |
| 569.8216115  |              |             |             |             |             |
| THEM5        | THEM5        | 264.5862599 | 277.3059003 | 366.8547848 |             |
| 524.7066474  |              |             |             |             |             |
| PRSS27       | PRSS27       | 9.375103698 | 20.2477324  | 6.690360818 |             |
| 11.76912106  |              |             |             |             |             |
| MAGT1        | MAGT1        | 6719.865995 | 6172.917374 | 5361.209135 |             |
| 5422.62253   |              |             |             |             |             |
| POM121C      | POM121C      | 1718.769011 | 2493.112094 | 1834.273924 |             |
| 2223.383121  |              |             |             |             |             |
| LOC101927830 | LOC101927830 |             | 2.083356377 | 2.641008574 |             |
| 2.230120273  | 7.846080709  |             |             |             |             |
| KLHL32       | KLHL32       | 21.87524196 | 33.45277527 | 88.08975076 |             |
| 85.32612771  |              |             |             |             |             |
| PHEX         | PHEX         | 67.70908227 | 205.1183326 | 112.6210738 |             |
| 356.0159122  |              |             |             |             |             |
| ATP6V0C      | ATP6V0C      | 1167.72125  | 2849.648252 | 1711.617309 |             |
| 1143.566263  |              |             |             |             |             |
| EEA1         | EEA1         | 402.0877808 | 643.5257559 | 1202.034827 |             |
| 856.2035574  |              |             |             |             |             |
| KYNU         | KYNU         | 0           | 5.282017149 | 0           | 10.78836098 |
| RTDR1        | RTDR1        | 0           | 0.880336191 | 0           | 0           |
| ANKIB1       | ANKIB1       | 635.4236951 | 1128.590997 | 553.0698276 |             |
| 674.762941   |              |             |             |             |             |
| DKK2         | DKK2         | 0           | 0           | 0           | 0.980760089 |
| CLPTM1       | CLPTM1       | 1642.726504 | 2821.477494 | 1215.415549 |             |
| 1278.911156  |              |             |             |             |             |
| MIS18A       | MIS18A       | 1519.808477 | 1592.52817  | 912.1191915 |             |
| 1077.855337  |              |             |             |             |             |
| CCDC93       | CCDC93       | 1750.019357 | 1962.269371 | 2050.595591 |             |
| 2148.845354  |              |             |             |             |             |
| SIN3A        | SIN3A        | 2702.113221 | 5430.793965 | 3655.167127 |             |
| 4149.595935  |              |             |             |             |             |
| KLRF1        | KLRF1        | 14.58349464 | 8.803361914 | 2.230120273 |             |
| 15.69216142  |              |             |             |             |             |
| DGKA         | DGKA         | 17072.06383 | 15919.11935 | 11194.08871 |             |
| 18067.56235  |              |             |             |             |             |
| STT3A        | STT3A        | 18975.20989 | 13091.4795  | 12765.20844 |             |
| 12787.15004  |              |             |             |             |             |
| SCIN         | SCIN         | 20.83356377 | 10.5640343  | 89.2048109  |             |
| 32.36508293  |              |             |             |             |             |
| PI16         | PI16         | 101.0427843 | 182.2295916 | 31.22168382 |             |
| 28.44204257  |              |             |             |             |             |
| KIAA1919     | KIAA1919     |             | 368.7540788 | 269.3828746 |             |
| 217.4367266  | 269.7090244  |             |             |             |             |
| CHDC2        | CHDC2        | 0           | 0           | 0           | 1.961520177 |
| CD01         | CD01         | 19.79188559 | 4.401680957 | 4.460240545 | 0           |

|             |             |             |             |             |   |
|-------------|-------------|-------------|-------------|-------------|---|
| AHRR        | AHRR        | 2978.157941 | 2587.308067 | 2080.702214 |   |
| 2214.55628  |             |             |             |             |   |
| MRPL46      | MRPL46      | 3315.661675 | 2376.027381 | 2851.208768 |   |
| 2452.880982 |             |             |             |             |   |
| ZNF165      | ZNF165      | 61.45901313 | 69.54655912 | 120.4264947 |   |
| 110.82589   |             |             |             |             |   |
| KRT8        | KRT8        | 36.4587366  | 29.93143051 | 100.3554123 |   |
| 92.19144833 |             |             |             |             |   |
| ZSCAN20     | ZSCAN20     | 68.75076045 | 113.5633687 | 223.0120273 |   |
| 58.84560532 |             |             |             |             |   |
| SYAP1       | SYAP1       | 2742.738671 | 2020.371559 | 2850.093708 |   |
| 2182.191197 |             |             |             |             |   |
| FANK1       | FANK1       | 105.2094971 | 52.82017149 | 82.51445008 |   |
| 44.13420399 |             |             |             |             |   |
| ENTHD2      | ENTHD2      | 246.8777307 | 559.0134816 | 196.250584  |   |
| 244.2092621 |             |             |             |             |   |
| LIG3        | LIG3        | 2212.524473 | 2839.964554 | 2318.210023 |   |
| 2824.589055 |             |             |             |             |   |
| CD300LF     | CD300LF     | 0           | 0.880336191 | 0           |   |
| ADD2        | ADD2        | 119.7929917 | 228.0070736 | 108.1608332 |   |
| 269.7090244 |             |             |             |             |   |
| KCNJ15      | KCNJ15      | 40.62544936 | 60.74319721 | 49.062646   |   |
| 48.05724434 |             |             |             |             |   |
| CYB561D2    | CYB561D2    |             | 3472.955081 | 2500.154784 |   |
| 2244.616054 | 2140.999274 |             |             |             |   |
| PNRC1       | PNRC1       | 1768.769564 | 2912.152121 | 10310.96108 |   |
| 7375.315867 |             |             |             |             |   |
| DNASE1L2    | DNASE1L2    |             | 3.125034566 | 4.401680957 | 0 |
| 4.903800443 |             |             |             |             |   |
| TXK         | TXK         | 853.1344365 | 1434.947992 | 1755.104654 |   |
| 2313.613049 |             |             |             |             |   |
| KHNYN       | KHNYN       | 5824.022753 | 6842.853216 | 8827.931099 |   |
| 8455.132724 |             |             |             |             |   |
| EHMT1-IT1   | EHMT1-IT1   |             | 3.125034566 | 14.08537906 |   |
| 1.115060136 | 1.961520177 |             |             |             |   |
| LINC00115   | LINC00115   |             | 37.50041479 | 44.89714576 |   |
| 31.22168382 | 31.38432284 |             |             |             |   |
| RRN3P3      | RRN3P3      | 709.3828465 | 937.5580439 | 500.6620012 |   |
| 671.8206607 |             |             |             |             |   |
| MX1         | MX1         | 34555.59055 | 13131.97497 | 36009.75204 |   |
| 12931.32177 |             |             |             |             |   |
| C6orf223    | C6orf223    |             | 0           | 0.880336191 | 0 |
| 0.980760089 |             |             |             |             |   |
| DAGLB       | DAGLB       | 1158.346146 | 1081.052843 | 1148.51194  |   |
| 967.0294474 |             |             |             |             |   |
| PAQR7       | PAQR7       | 13.54181645 | 37.85445623 | 20.07108245 |   |
| 20.59596186 |             |             |             |             |   |
| LCE1C       | LCE1C       | 0           | 7.805420954 | 0           |   |
| MIR658      | MIR658      | 77.08418596 | 66.02521436 | 52.4078264  |   |
| 46.09572417 |             |             |             |             |   |

|              |              |             |             |             |             |
|--------------|--------------|-------------|-------------|-------------|-------------|
| UNQ6494      | UNQ6494      | 2028.147433 | 1357.478407 | 525.1933242 |             |
| 578.6484523  |              |             |             |             |             |
| AGPAT4-IT1   | AGPAT4-IT1   |             | 16.66685102 | 10.5640343  | 0           |
|              | 22.55748204  |             |             |             |             |
| VAT1         | VAT1         | 1119.804053 | 1084.574188 | 2069.551613 |             |
| 1746.733718  |              |             |             |             |             |
| BAI2         | BAI2         | 2.083356377 | 7.042689532 | 0           | 18.63444168 |
| RBP2         | RBP2         | 2.083356377 | 0           | 5.575300681 | 0.980760089 |
| RAB27B       | RAB27B       | 17.70852921 | 70.42689532 | 140.4975772 |             |
| 95.1337286   |              |             |             |             |             |
| LTBR         | LTBR         | 14.58349464 | 3.521344766 | 17.84096218 |             |
| 24.51900222  |              |             |             |             |             |
| IRF2         | IRF2         | 7956.338005 | 8271.638855 | 8225.798625 |             |
| 7106.587602  |              |             |             |             |             |
| ANKRD29      | ANKRD29      | 13.54181645 | 22.00840479 | 13.38072164 | 0           |
| CYP17A1      | CYP17A1      | 4.166712755 | 0.880336191 | 0           | 0           |
| COL4A4       | COL4A4       | 1.041678189 | 9.683698106 | 20.07108245 |             |
| 8.826840798  |              |             |             |             |             |
| PCYT1A       | PCYT1A       | 2667.737841 | 1768.595409 | 1865.495608 |             |
| 1370.121844  |              |             |             |             |             |
| LOC103611081 | LOC103611081 |             | 11.45846008 | 41.375801   |             |
| 73.59396899  | 41.19192372  |             |             |             |             |
| SYNP02L      | SYNP02L      | 0           | 0           | 0.980760089 |             |
| MAP6D1       | MAP6D1       | 191.6687867 | 186.6312726 | 288.8005753 |             |
| 295.2087867  |              |             |             |             |             |
| CAV1         | CAV1         | 104.1678189 | 36.97412004 | 92.54999131 |             |
| 102.9798093  |              |             |             |             |             |
| PRPS1        | PRPS1        | 2452.110456 | 4760.858123 | 3164.540667 |             |
| 3009.952712  |              |             |             |             |             |
| SPSB2        | SPSB2        | 327.0869513 | 462.1765005 | 410.3421301 |             |
| 492.3415645  |              |             |             |             |             |
| ARC          | ARC          | 5.208390943 | 12.32470668 | 51.29276627 |             |
| 24.51900222  |              |             |             |             |             |
| TRAPPC1      | TRAPPC1      | 4503.17481  | 6818.203803 | 3305.038244 |             |
| 3834.771947  |              |             |             |             |             |
| WFDC1        | WFDC1        | 13.54181645 | 0           | 0           | 0           |
| SNRPB2       | SNRPB2       | 4565.675501 | 4606.79929  | 4038.747814 |             |
| 3743.561258  |              |             |             |             |             |
| CDCA5        | CDCA5        | 10098.02836 | 9053.377393 | 5390.200699 |             |
| 7082.0686    |              |             |             |             |             |
| MED31        | MED31        | 1246.888792 | 1288.812184 | 1302.390239 |             |
| 1319.122319  |              |             |             |             |             |
| LOC100507547 | LOC100507547 |             | 0           | 1.760672383 | 4.460240545 |
|              | 1.961520177  |             |             |             |             |
| ATMIN        | ATMIN        | 6379.237228 | 5083.941506 | 6356.957837 |             |
| 5138.202105  |              |             |             |             |             |
| FAM118A      | FAM118A      | 2465.652273 | 2233.412918 | 3224.753914 |             |
| 3110.971001  |              |             |             |             |             |
| NKX3-1       | NKX3-1       | 3.125034566 | 34.33311147 | 54.63794668 |             |
| 60.8071255   |              |             |             |             |             |

|             |           |             |             |             |             |
|-------------|-----------|-------------|-------------|-------------|-------------|
| CLUH        | CLUH      | 2661.487772 | 3815.377054 | 3155.620186 |             |
| 3245.335133 |           |             |             |             |             |
| SCN9A       | SCN9A     | 16.66685102 | 97.71731725 | 0           | 12.74988115 |
| LOC339059   | LOC339059 | 0           | 2.641008574 | 0           | 0           |
| HDDC3       | HDDC3     | 1975.021846 | 1310.820589 | 1512.021545 |             |
| 1496.639895 |           |             |             |             |             |
| SIGLEC5     | SIGLEC5   | 0           | 2.641008574 | 0           | 0           |
| RTN2        | RTN2      | 32.29202385 | 91.55496391 | 47.94758586 |             |
| 50.99952461 |           |             |             |             |             |
| CNTN3       | CNTN3     | 1.041678189 | 0           | 0           | 0           |
| ANK3        | ANK3      | 765.6334687 | 882.0968638 | 2045.02029  |             |
| 1512.332057 |           |             |             |             |             |
| CTAGE9      | CTAGE9    | 1.041678189 | 0           | 0           | 0           |
| IFNG        | IFNG      | 5175.057241 | 6215.173512 | 5564.15008  |             |
| 5239.220394 |           |             |             |             |             |
| MAN2B1      | MAN2B1    | 8246.96622  | 6449.342938 | 4415.63814  |             |
| 5820.811126 |           |             |             |             |             |
| PPP6R2      | PPP6R2    | 3658.373799 | 4105.007661 | 2751.968416 |             |
| 3504.255797 |           |             |             |             |             |
| KCTD14      | KCTD14    | 39.58377117 | 19.36739621 | 42.37228518 |             |
| 22.55748204 |           |             |             |             |             |
| AACS        | AACS      | 1036.469798 | 840.7210628 | 909.8890712 |             |
| 1004.298331 |           |             |             |             |             |
| MIR548K     | MIR548K   | 1.041678189 | 1.760672383 | 0           | 0           |
| MIR1287     | MIR1287   | 4.166712755 | 7.042689532 | 0           | 4.903800443 |
| MIR1207     | MIR1207   | 0           | 2.230120273 | 0           | 0           |
| PIEZ01      | PIEZ01    | 4529.216764 | 9933.713584 | 3311.728605 |             |
| 4137.826814 |           |             |             |             |             |
| DZIP3       | DZIP3     | 1092.72042  | 1130.35167  | 991.2884611 |             |
| 1077.855337 |           |             |             |             |             |
| C4BPA       | C4BPA     | 0           | 2.230120273 | 0.980760089 |             |
| PGD         | PGD       | 9273.019236 | 7563.848557 | 5312.146489 |             |
| 5662.908752 |           |             |             |             |             |
| JUNB        | JUNB      | 20374.18369 | 22284.83035 | 16266.49727 |             |
| 25342.84069 |           |             |             |             |             |
| JUN         | JUN       | 1658.351676 | 1348.675045 | 1615.722137 |             |
| 1110.22042  |           |             |             |             |             |
| ITPR2       | ITPR2     | 892.7182077 | 1146.197721 | 1231.02639  |             |
| 1261.257474 |           |             |             |             |             |
| CDCA7L      | CDCA7L    | 5334.434004 | 4760.858123 | 3439.96052  |             |
| 3118.817082 |           |             |             |             |             |
| CCL2        | CCL2      | 0           | 1.760672383 | 2.230120273 | 0           |
| CCL1        | CCL1      | 166.6685102 | 1222.78697  | 989.0583409 |             |
| 1123.951062 |           |             |             |             |             |
| CPSF1       | CPSF1     | 5510.477618 | 7033.88617  | 3828.001448 |             |
| 5865.92609  |           |             |             |             |             |
| ARFGEF1     | ARFGEF1   | 2817.7395   | 4573.346515 | 4420.09838  |             |
| 3622.927768 |           |             |             |             |             |
| SLC6A13     | SLC6A13   | 7.291747321 | 6.16235334  | 0           | 0           |
| LINC00842   | LINC00842 | 0           | 0           | 1.115060136 |             |

|             |           |             |             |             |             |
|-------------|-----------|-------------|-------------|-------------|-------------|
| 4.903800443 |           |             |             |             |             |
| LYNX1       | LYNX1     | 4.166712755 | 7.923025723 | 35.68192436 |             |
| 3.923040355 |           |             |             |             |             |
| CAMKV       | CAMKV     | 0           | 14.08537906 | 0           | 18.63444168 |
| ZNF317      | ZNF317    | 3792.750285 | 2989.621706 | 4393.336937 |             |
| 4038.770045 |           |             |             |             |             |
| ANAPC13     | ANAPC13   | 1854.187176 | 1729.860616 | 3536.970752 |             |
| 2507.803547 |           |             |             |             |             |
| YIPF3       | YIPF3     | 4765.677713 | 4272.271537 | 3998.605649 |             |
| 3912.251994 |           |             |             |             |             |
| TECPR1      | TECPR1    | 836.4675855 | 1470.16144  | 911.0041313 |             |
| 610.0327752 |           |             |             |             |             |
| ICOS        | ICOS      | 21295.02721 | 13698.91148 | 14033.03181 |             |
| 12155.54054 |           |             |             |             |             |
| SCUBE1      | SCUBE1    | 18.7502074  | 140.8537906 | 0           | 2.942280266 |
| AUNIP       | AUNIP     | 1671.893493 | 1297.615546 | 1422.816734 |             |
| 1259.295954 |           |             |             |             |             |
| GIT2        | GIT2      | 10314.69742 | 8569.192487 | 7166.491496 |             |
| 7959.84888  |           |             |             |             |             |
| COL16A1     | COL16A1   | 7.291747321 | 1.760672383 | 13.38072164 |             |
| 3.923040355 |           |             |             |             |             |
| IGSF9       | IGSF9     | 6.250069132 | 5.282017149 | 10.03554123 |             |
| 9.807600887 |           |             |             |             |             |
| LOC728637   | LOC728637 | 0           | 0           | 7.805420954 |             |
| 1.961520177 |           |             |             |             |             |
| NET01       | NET01     | 0           | 10.5640343  | 0           |             |
| APLP1       | APLP1     | 23.95859834 | 38.73479242 | 42.37228518 |             |
| 17.6536816  |           |             |             |             |             |
| TBC1D10A    | TBC1D10A  |             | 1931.271362 | 1916.491889 |             |
| 1602.341416 |           | 1987.01994  |             |             |             |
| ZNF512B     | ZNF512B   | 254.169478  | 530.8427234 | 150.5331184 |             |
| 254.016863  |           |             |             |             |             |
| ANG         | ANG       | 85.41761147 | 52.82017149 | 73.59396899 |             |
| 46.09572417 |           |             |             |             |             |
| LRRIQ3      | LRRIQ3    | 108.3345316 | 88.03361914 | 154.9933589 |             |
| 96.11448869 |           |             |             |             |             |
| LM07        | LM07      | 171.8769011 | 276.4255641 | 1479.684801 |             |
| 1260.276714 |           |             |             |             |             |
| CLASP2      | CLASP2    | 3233.369098 | 4735.328374 | 3089.831638 |             |
| 3083.509719 |           |             |             |             |             |
| POU2F2      | POU2F2    | 942.7187608 | 1023.830991 | 607.7077743 |             |
| 917.991443  |           |             |             |             |             |
| EDF1        | EDF1      | 8995.932838 | 8341.185414 | 7864.519141 |             |
| 7650.909452 |           |             |             |             |             |
| DACH2       | DACH2     | 0           | 0           | 3.345180409 | 0           |
| SELO        | SELO      | 1307.306127 | 1085.454524 | 802.8432981 |             |
| 1127.874102 |           |             |             |             |             |
| AMMECR1L    | AMMECR1L  |             | 1621.89294  | 1720.176918 |             |
| 1742.838993 |           | 1513.312817 |             |             |             |
| SDC1        | SDC1      | 10.41678189 | 18.48706002 | 0           | 12.74988115 |

|             |             |               |               |             |
|-------------|-------------|---------------|---------------|-------------|
| SH3GL1      | SH3GL1      | 1208.346699   | 2007.166516   | 1147.39688  |
| 1322.0646   |             |               |               |             |
| ITSN1       | ITSN1       | 182.293683    | 183.990264    | 248.6584104 |
| 152.0178137 |             |               |               |             |
| GNB1        | GNB1        | 24212.76782   | 22616.71709   | 16680.18458 |
| 18080.31223 |             |               |               |             |
| CASP3       | CASP3       | 23217.96515   | 14954.27088   | 10358.90867 |
| 9982.176182 |             |               |               |             |
| BAD         | BAD         | 2137.523643   | 1758.031374   | 1073.802911 |
| 1445.640371 |             |               |               |             |
| TAPBP       | TAPBP       | 532.2975544   | 596.8679378   | 698.0276453 |
| 897.3954811 |             |               |               |             |
| HIST1H2AJ   | HIST1H2AJ   |               | 126.0430608   | 275.5452279 |
| 92.54999131 | 75.51852683 |               |               |             |
| HIST1H2BJ   | HIST1H2BJ   |               | 81.25089872   | 94.19597248 |
| 40.14216491 | 17.6536816  |               |               |             |
| LMTK2       | LMTK2       | 465.6301503   | 953.4040953   | 1115.060136 |
| 625.7249366 |             |               |               |             |
| KDM1A       | KDM1A       | 8263.633071   | 8103.494642   | 6572.164443 |
| 8537.516572 |             |               |               |             |
| TIMP3       | TIMP3       | 3.125034566   | 5.282017149   | 0 0         |
| KLRC2       | KLRC2       | 3.125034566   | 0 6.690360818 | 1.961520177 |
| KLK1        | KLK1        | 4.166712755   | 14.08537906   | 7.805420954 |
| 9.807600887 |             |               |               |             |
| KISS1       | KISS1       | 0 0.880336191 | 0             | 0           |
| SLC33A1     | SLC33A1     | 2808.364397   | 2023.012568   | 2455.36242  |
| 2124.326352 |             |               |               |             |
| GRHL2       | GRHL2       | 1.041678189   | 4.401680957   | 0 0         |
| PCMT1       | PCMT1       | 14428.28459   | 11203.15837   | 10822.77368 |
| 10065.54079 |             |               |               |             |
| PRKCE       | PRKCE       | 61.45901313   | 103.8796706   | 243.0831097 |
| 188.305937  |             |               |               |             |
| PIGK        | PIGK        | 3271.911191   | 2590.829411   | 2531.186509 |
| 2815.762215 |             |               |               |             |
| MED16       | MED16       | 5836.522891   | 6206.37015    | 4591.817641 |
| 6156.231077 |             |               |               |             |
| CNPY3       | CNPY3       | 2597.945403   | 2581.145713   | 3722.070735 |
| 3146.278364 |             |               |               |             |
| DNAJC4      | DNAJC4      | 407.2961718   | 556.372473    | 510.6975424 |
| 751.2622279 |             |               |               |             |
| LGALS8      | LGALS8      | 7178.204398   | 6343.702596   | 6645.758412 |
| 7508.699239 |             |               |               |             |
| RPS21       | RPS21       | 5202.140874   | 7399.225689   | 6488.534933 |
| 6274.903047 |             |               |               |             |
| DSP         | DSP         | 5.208390943   | 0 43.48734531 | 12.74988115 |
| RBBP9       | RBBP9       | 1431.265831   | 1564.357412   | 1496.410703 |
| 1579.023743 |             |               |               |             |
| C19orf53    | C19orf53    |               | 4320.881127   | 3923.658405 |
| 4158.059248 | 3676.869572 |               |               |             |
| SPACA6P-AS  | SPACA6P-AS  |               | 0 0 0         | 5.884560532 |

|              |              |             |             |             |   |
|--------------|--------------|-------------|-------------|-------------|---|
| MGAT3        | MGAT3        | 7.291747321 | 22.00840479 | 22.30120273 | 0 |
| ERH          | ERH          | 4133.379053 | 6782.110019 | 3696.424352 |   |
| 3371.853185  |              |             |             |             |   |
| EPHB4        | EPHB4        | 4.166712755 | 11.44437049 | 23.41626286 |   |
| 12.74988115  |              |             |             |             |   |
| NME1         | NME1         | 17444.98463 | 14082.73805 | 13837.89629 |   |
| 14700.61297  |              |             |             |             |   |
| ZNF565       | ZNF565       | 191.6687867 | 146.1358078 | 342.3234618 |   |
| 302.0741073  |              |             |             |             |   |
| CENPN        | CENPN        | 7464.6659   | 7533.03679  | 5220.711558 |   |
| 5247.066474  |              |             |             |             |   |
| ZNF576       | ZNF576       | 638.5487297 | 692.8245827 | 748.2053514 |   |
| 650.2439388  |              |             |             |             |   |
| C19orf57     | C19orf57     |             | 139.5848773 | 161.9818592 |   |
| 177.2945617  | 301.0933472  |             |             |             |   |
| NUDT16       | NUDT16       | 639.5904079 | 1041.437714 | 335.633101  |   |
| 565.8985712  |              |             |             |             |   |
| TBX2         | TBX2         | 0           | 14.49578177 | 0           |   |
| RNMTL1       | RNMTL1       | 2728.155176 | 2059.986688 | 2580.249155 |   |
| 2482.303784  |              |             |             |             |   |
| SRD5A3       | SRD5A3       | 1147.929364 | 1243.915039 | 761.5860731 |   |
| 1132.777902  |              |             |             |             |   |
| HECTD3       | HECTD3       | 4596.925847 | 3702.694021 | 4130.182745 |   |
| 3761.21494   |              |             |             |             |   |
| KIAA1551     | KIAA1551     |             | 9514.688576 | 9505.870195 |   |
| 16676.8394   | 13119.62771  |             |             |             |   |
| NADSYN1      | NADSYN1      | 3680.249041 | 3570.643592 | 2251.306415 |   |
| 3420.891189  |              |             |             |             |   |
| TFAP2A       | TFAP2A       | 4.166712755 | 9.683698106 | 2.230120273 |   |
| 7.846080709  |              |             |             |             |   |
| LONRF3       | LONRF3       | 62.50069132 | 46.65781815 | 341.2084017 |   |
| 211.8441792  |              |             |             |             |   |
| UBQLN3       | UBQLN3       | 0           | 0           | 3.923040355 |   |
| LOC101929829 | LOC101929829 |             | 9.375103698 | 21.12806859 |   |
| 16.72590204  | 14.71140133  |             |             |             |   |
| CELSR3-AS1   | CELSR3-AS1   |             | 1.041678189 | 9.683698106 | 0 |
| 6.865320621  |              |             |             |             |   |
| TBX1         | TBX1         | 2.083356377 | 10.5640343  | 1.115060136 |   |
| 7.846080709  |              |             |             |             |   |
| ZKSCAN4      | ZKSCAN4      | 279.1697546 | 237.6907717 | 546.3794668 |   |
| 439.3805197  |              |             |             |             |   |
| UBOX5        | UBOX5        | 1362.515071 | 1168.206126 | 1238.831811 |   |
| 1218.10403   |              |             |             |             |   |
| LGALS3       | LGALS3       | 9304.269581 | 7078.783315 | 4590.702581 |   |
| 4910.665764  |              |             |             |             |   |
| RGPD4        | RGPD4        | 12.50013826 | 0.880336191 | 14.49578177 |   |
| 2.942280266  |              |             |             |             |   |
| ACTR8        | ACTR8        | 4361.506576 | 2474.625034 | 3384.207514 |   |
| 2509.765067  |              |             |             |             |   |
| UBE2F-SCLY   | UBE2F-SCLY   |             | 8065.714215 | 7269.816269 |   |

|                 |               |             |               |             |
|-----------------|---------------|-------------|---------------|-------------|
| 5442.608525     | 6318.056491   |             |               |             |
| TFRC TFRC       | 116634.6234   | 128173.4281 | 47662.13046   |             |
| 79198.33868     |               |             |               |             |
| TDRD10 TDRD10   | 0 0           | 12.2656615  | 0             |             |
| C8orf37-AS1     | C8orf37-AS1   | 8.33342551  | 2.641008574   |             |
| 2.230120273     | 6.865320621   |             |               |             |
| LINC00948       | LINC00948     | 0           | 2.641008574   | 1.115060136 |
| 0               |               |             |               |             |
| SAMD3 SAMD3     | 1795.853197   | 1101.300575 | 415.9174308   |             |
| 397.2078359     |               |             |               |             |
| OSGIN1 OSGIN1   | 113.5429226   | 22.88874098 | 181.7548022   |             |
| 33.34584301     |               |             |               |             |
| LOC100505716    | LOC100505716  | 22.91692015 | 47.53815434   |             |
| 49.062646       | 58.84560532   |             |               |             |
| SSR4P1 SSR4P1   | 4.166712755   | 27.29042193 | 31.22168382   |             |
| 40.21116364     |               |             |               |             |
| UCKL1-AS1       | UCKL1-AS1     | 179.1686485 | 205.1183326   |             |
| 147.187938      | 187.3251769   |             |               |             |
| LOC399815       | LOC399815     | 139.5848773 | 154.0588335   |             |
| 131.5770961     | 168.6907353   |             |               |             |
| MGC45800        | MGC45800      | 0 0         | 0 0.980760089 |             |
| C1orf220        | C1orf220      | 1.041678189 | 7.923025723   |             |
| 12.2656615      | 7.846080709   |             |               |             |
| CCT4 CCT4       | 23692.9704    | 20069.02416 | 20682.13541   |             |
| 25546.83879     |               |             |               |             |
| KC6 KC6         | 0 0           | 3.345180409 | 0             |             |
| SNORA57 SNORA57 | 12.50013826   | 21.12806859 | 12.2656615    |             |
| 20.59596186     |               |             |               |             |
| SNORA16B        | SNORA16B      | 1.041678189 | 0 0           |             |
| 4.903800443     |               |             |               |             |
| SCARNA14        | SCARNA14      | 2.083356377 | 6.16235334    | 0           |
| 1.961520177     |               |             |               |             |
| SNAR-G1 SNAR-G1 | 0 2.641008574 | 0           | 0.980760089   |             |
| SNORD105        | SNORD105      | 4.166712755 | 1.760672383   |             |
| 11.15060136     | 1.961520177   |             |               |             |
| SNORD104        | SNORD104      | 17.70852921 | 18.48706002   |             |
| 18.95602232     | 28.44204257   |             |               |             |
| SNORD96B        | SNORD96B      | 0 0         | 1.115060136   | 0           |
| SNORD94 SNORD94 | 14.58349464   | 22.00840479 | 15.61084191   |             |
| 18.63444168     |               |             |               |             |
| STAP2 STAP2     | 429.1714137   | 357.4164937 | 276.5349138   |             |
| 383.4771947     |               |             |               |             |
| CADM2 CADM2     | 4.166712755   | 29.05109432 | 22.30120273   |             |
| 50.01876452     |               |             |               |             |
| MINA MINA       | 11578.25307   | 4936.045025 | 4129.067685   |             |
| 3577.812803     |               |             |               |             |
| TSC22D2 TSC22D2 | 827.0924818   | 886.4985448 | 1634.67816    |             |
| 1099.432059     |               |             |               |             |
| URB2 URB2       | 2460.443882   | 2576.744032 | 2672.799147   |             |
| 3113.913282     |               |             |               |             |



|             |             |             |             |             |
|-------------|-------------|-------------|-------------|-------------|
| PDGFRA      | PDGFRA      | 82.29257691 | 56.34151625 | 16.72590204 |
| 3.923040355 |             |             |             |             |
| PDE6H       | PDE6H       | 2.083356377 | 0           | 5.884560532 |
| PAX9        | PAX9        | 0           | 1.760672383 | 2.230120273 |
| 3.923040355 |             |             |             |             |
| CRABP1      | CRABP1      | 2.083356377 | 3.521344766 | 0           |
| ZNF295-AS1  | ZNF295-AS1  | 8.92048109  | 1.041678189 | 14.08537906 |
| 54.92256497 |             |             |             |             |
| NMT2        | NMT2        | 2175.024058 | 1155.881419 | 1791.901639 |
| 1290.680277 |             |             |             |             |
| MLXIP       | MLXIP       | 1494.808201 | 2553.855291 | 2610.355779 |
| 2250.844403 |             |             |             |             |
| C20orf173   | C20orf173   |             | 0           | 2.230120273 |
| 6.865320621 |             |             |             |             |
| XDH         | XDH         | 7.291747321 | 0           | 1.961520177 |
| PTMA        | PTMA        | 59768.36943 | 73226.3644  | 54506.36958 |
| 56113.20771 |             |             |             |             |
| MROH1       | MROH1       | 1095.845455 | 1489.528836 | 1078.263152 |
| 1494.678375 |             |             |             |             |
| CCDC17      | CCDC17      | 11.45846008 | 16.72638764 | 37.91204463 |
| 16.67292151 |             |             |             |             |
| EFCAB13     | EFCAB13     | 51.04223125 | 34.33311147 | 287.6855152 |
| 143.1909729 |             |             |             |             |
| ECI2        | ECI2        | 3207.327143 | 3668.36091  | 4153.599008 |
| 4125.076933 |             |             |             |             |
| E0GT        | E0GT        | 1750.019357 | 1993.081137 | 1128.440858 |
| 1441.71733  |             |             |             |             |
| ADTRP       | ADTRP       | 1642.726504 | 1044.959059 | 1898.947412 |
| 1376.006404 |             |             |             |             |
| PLEKHA8     | PLEKHA8     | 423.9630228 | 688.4229017 | 626.6637966 |
| 702.2242235 |             |             |             |             |
| TMEM5       | TMEM5       | 1525.016868 | 1097.779231 | 1447.348057 |
| 1453.486451 |             |             |             |             |
| HSPA1B      | HSPA1B      | 85.41761147 | 56.34151625 | 132.6921562 |
| 89.24916807 |             |             |             |             |
| EGFL7       | EGFL7       | 47.91719668 | 34.33311147 | 55.75300681 |
| 52.96104479 |             |             |             |             |
| ZNF134      | ZNF134      | 1192.721526 | 1065.206792 | 1417.241433 |
| 1185.738947 |             |             |             |             |
| ECI1        | ECI1        | 2304.192153 | 2648.9316   | 1745.069113 |
| 2215.53704  |             |             |             |             |
| PHC2        | PHC2        | 3143.784773 | 2796.82808  | 3359.676191 |
| 3185.508768 |             |             |             |             |
| SEC24D      | SEC24D      | 5809.439258 | 5036.403351 | 4150.253827 |
| 3370.872425 |             |             |             |             |
| POLE        | POLE        | 2286.483624 | 6117.456194 | 1934.629336 |
| 3017.798793 |             |             |             |             |
| ALDH18A1    | ALDH18A1    |             | 10586.57543 | 8804.242251 |
| 6168.512674 | 9448.642694 |             |             |             |
| ZNF585B     | ZNF585B     | 266.6696163 | 360.9378385 | 1273.398676 |
| 691.4358625 |             |             |             |             |

|             |             |             |             |             |             |
|-------------|-------------|-------------|-------------|-------------|-------------|
| FAM58A      | FAM58A      | 1898.979338 | 1299.376219 | 1617.952258 |             |
| 1420.140608 |             |             |             |             |             |
| PARS2       | PARS2       | 517.7140598 | 422.5613719 | 608.8228344 |             |
| 567.8600913 |             |             |             |             |             |
| OLFML2B     | OLFML2B     | 4.166712755 | 7.923025723 | 0           | 3.923040355 |
| GORAB       | GORAB       | 735.4248012 | 649.6881093 | 758.2408927 |             |
| 725.7624656 |             |             |             |             |             |
| LOC643072   | LOC643072   |             | 89.58432423 | 50.17916291 |             |
| 55.75300681 | 78.46080709 |             |             |             |             |
| RAET1G      | RAET1G      | 1.041678189 | 0           | 0           | 6.865320621 |
| FRRS1       | FRRS1       | 1.041678189 | 15.84605145 | 0           | 5.884560532 |
| VSIG8       | VSIG8       | 3.125034566 | 11.44437049 | 18.95602232 |             |
| 9.807600887 |             |             |             |             |             |
| SLC2A4RG    | SLC2A4RG    |             | 84.37593328 | 520.2786891 |             |
| 78.05420954 | 156.9216142 |             |             |             |             |
| ASB8        | ASB8        | 2805.239362 | 2195.558461 | 3199.107531 |             |
| 2513.688107 |             |             |             |             |             |
| TUBA4A      | TUBA4A      | 29316.99094 | 27568.60817 | 15608.61179 |             |
| 23280.30222 |             |             |             |             |             |
| FRS3        | FRS3        | 87.50096785 | 100.3583258 | 93.66505145 |             |
| 126.5180514 |             |             |             |             |             |
| MIR3610     | MIR3610     | 16.66685102 | 36.09378385 | 12.2656615  |             |
| 11.76912106 |             |             |             |             |             |
| MIR3607     | MIR3607     | 1.041678189 | 3.521344766 | 3.345180409 |             |
| 1.961520177 |             |             |             |             |             |
| MIR3605     | MIR3605     | 327.0869513 | 238.5711079 | 364.6246646 |             |
| 305.9971477 |             |             |             |             |             |
| PRH1-PRR4   | PRH1-PRR4   |             | 977.094141  | 775.5761847 |             |
| 899.85353   | 866.0111583 |             |             |             |             |
| LOC731424   | LOC731424   |             | 6.250069132 | 3.521344766 | 0           |
| 2.942280266 |             |             |             |             |             |
| PPP2R1A     | PPP2R1A     | 20375.22537 | 16383.05652 | 16306.63943 |             |
| 19188.57113 |             |             |             |             |             |
| EVI2A       | EVI2A       | 1966.68842  | 2226.370228 | 2788.765401 |             |
| 2356.766493 |             |             |             |             |             |
| SCAMP3      | SCAMP3      | 10701.16003 | 7312.952742 | 8454.385953 |             |
| 8318.807072 |             |             |             |             |             |
| GPC6        | GPC6        | 0           | 0.880336191 | 0           | 0           |
| TMEM121     | TMEM121     | 214.5857069 | 241.2121165 | 169.4891407 |             |
| 298.151067  |             |             |             |             |             |
| SLC30A2     | SLC30A2     | 0           | 0.880336191 | 0           | 0           |
| TIMM21      | TIMM21      | 3141.701417 | 2490.471086 | 2725.206973 |             |
| 3152.162925 |             |             |             |             |             |
| MED13L      | MED13L      | 232.2942361 | 645.2864283 | 619.9734358 |             |
| 515.8798066 |             |             |             |             |             |
| TNFSF15     | TNFSF15     | 4.166712755 | 3.521344766 | 8.92048109  |             |
| 16.67292151 |             |             |             |             |             |
| CCDC42      | CCDC42      | 1.041678189 | 8.803361914 | 17.84096218 |             |
| 0.980760089 |             |             |             |             |             |
| TAPBPL      | TAPBPL      | 2961.49109  | 2205.24216  | 2535.64675  |             |

|             |           |             |             |             |
|-------------|-----------|-------------|-------------|-------------|
| 2251.825164 |           |             |             |             |
| SPSB1       | SPSB1     | 2046.897641 | 4117.332367 | 651.1951196 |
| 1096.489779 |           |             |             |             |
| CTNNBIP1    | CTNNBIP1  |             | 159.3767629 | 280.8272451 |
| 234.1626286 |           | 241.2669818 |             |             |
| ADCK3       | ADCK3     | 3995.877532 | 2815.31514  | 5205.100716 |
| 3817.118265 |           |             |             |             |
| BMP2K       | BMP2K     | 597.9232803 | 882.9772    | 385.8108071 |
| 297.1703069 |           |             |             |             |
| SPOCK1      | SPOCK1    | 45.8338403  | 9.683698106 | 4.460240545 |
| 6.865320621 |           |             |             |             |
| PCNXL2      | PCNXL2    | 473.9635759 | 753.5677799 | 509.5824823 |
| 502.1491654 |           |             |             |             |
| RAB2B       | RAB2B     | 1026.053016 | 927.8743458 | 1028.085446 |
| 878.7610394 |           |             |             |             |
| CCDC136     | CCDC136   | 86.45928966 | 82.751602   | 142.7276974 |
| 123.5757712 |           |             |             |             |
| SPDYC       | SPDYC     | 0           | 0           | 6.690360818 |
| 1.961520177 |           |             |             |             |
| RUSC1-AS1   | RUSC1-AS1 |             | 2791.697546 | 3144.560876 |
| 1707.157069 |           | 2755.935849 |             |             |
| MED20       | MED20     | 2708.363291 | 2423.565535 | 1512.021545 |
| 1643.753909 |           |             |             |             |
| CHST3       | CHST3     | 14.58349464 | 79.23025723 | 18.95602232 |
| 2.942280266 |           |             |             |             |
| MIA-RAB4B   | MIA-RAB4B |             | 1948.979891 | 1964.910379 |
| 1567.774552 |           | 1646.696189 |             |             |
| UGP2        | UGP2      | 16700.18472 | 10147.63528 | 9591.747292 |
| 8458.075005 |           |             |             |             |
| MLLT3       | MLLT3     | 2673.98791  | 1560.836067 | 2126.41968  |
| 1834.021366 |           |             |             |             |
| DHRS7       | DHRS7     | 4681.30178  | 4168.391866 | 6315.700612 |
| 5597.197826 |           |             |             |             |
| TMEM19      | TMEM19    | 1566.683996 | 1936.739621 | 1353.683005 |
| 1581.966023 |           |             |             |             |
| PRIM1       | PRIM1     | 3682.332397 | 3506.37905  | 3196.877411 |
| 3347.334183 |           |             |             |             |
| SVIL        | SVIL      | 248.9610871 | 522.9196977 | 386.9258673 |
| 823.8384745 |           |             |             |             |
| SUV39H1     | SUV39H1   | 5250.058071 | 4558.380799 | 2843.403347 |
| 3358.122544 |           |             |             |             |
| SURF1       | SURF1     | 2304.192153 | 1616.297247 | 2514.460607 |
| 1680.042032 |           |             |             |             |
| RGS16       | RGS16     | 1752.102713 | 404.0743119 | 4166.979729 |
| 2382.266255 |           |             |             |             |
| C21orf2     | C21orf2   | 654.1739025 | 712.1919789 | 924.384853  |
| 794.4156718 |           |             |             |             |
| ABCA13      | ABCA13    | 5.208390943 | 0.880336191 | 2.230120273 |
| 0.980760089 |           |             |             |             |
| DNAJC18     | DNAJC18   | 1386.473669 | 1353.957062 | 1012.474604 |
| 1213.20023  |           |             |             |             |

|              |              |             |             |             |
|--------------|--------------|-------------|-------------|-------------|
| SLC23A1      | SLC23A1      | 18.7502074  | 16.72638764 | 7.805420954 |
| 6.865320621  |              |             |             |             |
| CMBL         | CMBL         | 39.58377117 | 31.69210289 | 71.36384872 |
| 61.78788559  |              |             |             |             |
| ACMSD        | ACMSD        | 15.62517283 | 10.5640343  | 22.30120273 |
| 15.69216142  |              |             |             |             |
| PPP1CC       | PPP1CC       | 14379.32572 | 15110.09039 | 13830.09087 |
| 14215.13673  |              |             |             |             |
| SLIRP        | SLIRP        | 6074.025518 | 6270.634692 | 4905.149539 |
| 5257.854835  |              |             |             |             |
| OSTC         | OSTC         | 7563.625328 | 6525.932187 | 6012.404255 |
| 4860.646999  |              |             |             |             |
| LAYN         | LAYN         | 888.551495  | 402.3136395 | 962.2968976 |
| 597.282894   |              |             |             |             |
| LOC100506804 | LOC100506804 |             | 21.87524196 | 21.12806859 |
| 70.24878858  | 21.57672195  |             |             |             |
| LOC441454    | LOC441454    |             | 6.250069132 | 15.84605145 |
| 2.230120273  | 2.942280266  |             |             |             |
| FAM183B      | FAM183B      | 0           | 2.230120273 | 0           |
| ACOT11       | ACOT11       | 81.25089872 | 87.15328295 | 12.2656615  |
| 118.6719707  |              |             |             |             |
| TMEM98       | TMEM98       | 14.58349464 | 27.29042193 | 7.805420954 |
| 12.74988115  |              |             |             |             |
| TERF2IP      | TERF2IP      | 10440.74049 | 7903.658327 | 12161.96091 |
| 9578.103026  |              |             |             |             |
| TMX4         | TMX4         | 3552.122623 | 4740.610391 | 3383.092453 |
| 3417.948909  |              |             |             |             |
| TRIM33       | TRIM33       | 3351.078733 | 3466.763922 | 4061.049016 |
| 3321.83442   |              |             |             |             |
| CRTAP        | CRTAP        | 2035.439181 | 2540.650248 | 1964.73596  |
| 2297.920888  |              |             |             |             |
| BORA         | BORA         | 4614.634376 | 4090.922282 | 2295.908821 |
| 3183.547248  |              |             |             |             |
| C17orf59     | C17orf59     |             | 1240.638723 | 936.6777077 |
| 1278.973976  | 846.3959565  |             |             |             |
| CROT         | CROT         | 742.7165485 | 578.3808778 | 882.0125678 |
| 691.4358625  |              |             |             |             |
| BCKDHA       | BCKDHA       | 4134.420731 | 3406.901061 | 3954.003243 |
| 4699.802345  |              |             |             |             |
| CREG1        | CREG1        | 3033.366885 | 2410.360492 | 2049.48053  |
| 1325.98764   |              |             |             |             |
| TNC          | TNC          | 25.00027653 | 5.282017149 | 36.7969845  |
| 23.53824213  |              |             |             |             |
| COL17A1      | COL17A1      | 3.125034566 | 0           | 0           |
| RPS7         | RPS7         | 8683.429381 | 10666.1533  | 9093.315411 |
| 9889.984734  |              |             |             |             |
| OPRD1        | OPRD1        | 0           | 3.521344766 | 0           |
| IGSF10       | IGSF10       | 1.041678189 | 5.282017149 | 0           |
| PES1         | PES1         | 8426.134868 | 5557.562377 | 7403.999305 |
| 7535.179761  |              |             |             |             |

|              |              |             |             |             |
|--------------|--------------|-------------|-------------|-------------|
| PPP2R5D      | PPP2R5D      | 7657.376365 | 8707.40527  | 5931.004865 |
| 6977.127271  |              |             |             |             |
| SYCE3        | SYCE3        | 3.125034566 | 13.20504287 | 2.230120273 |
| 12.74988115  |              |             |             |             |
| ENTPD6       | ENTPD6       | 2137.523643 | 1728.98028  | 2427.485917 |
| 2515.649627  |              |             |             |             |
| LAMA4        | LAMA4        | 4.166712755 | 0           | 0.980760089 |
| GNG12        | GNG12        | 18.7502074  | 22.88874098 | 45.71746559 |
| 23.53824213  |              |             |             |             |
| TRMT61A      | TRMT61A      | 1943.7715   | 1083.693852 | 2222.314852 |
| 1827.156045  |              |             |             |             |
| ZNF354B      | ZNF354B      | 143.75159   | 144.3751354 | 344.5535821 |
| 257.9399033  |              |             |             |             |
| PKHD1L1      | PKHD1L1      | 0           | 2.230120273 | 2.942280266 |
| TATDN1       | TATDN1       | 1437.5159   | 1063.446119 | 1654.749242 |
| 1745.752958  |              |             |             |             |
| ELAVL4       | ELAVL4       | 0           | 31.22168382 | 0           |
| PGPEP1       | PGPEP1       | 414.5879191 | 562.5348263 | 441.563814  |
| 505.0914457  |              |             |             |             |
| LPIN3        | LPIN3        | 9.375103698 | 17.60672383 | 13.38072164 |
| 9.807600887  |              |             |             |             |
| ADAMTS6      | ADAMTS6      | 19.79188559 | 65.14487817 | 16.72590204 |
| 23.53824213  |              |             |             |             |
| TMED7        | TMED7        | 3908.376564 | 3563.600903 | 4597.392942 |
| 3346.353423  |              |             |             |             |
| ESAM         | ESAM         | 9.375103698 | 6.16235334  | 31.22168382 |
| 42.17268381  |              |             |             |             |
| STK40        | STK40        | 6407.362539 | 6240.703261 | 5520.662735 |
| 5243.143434  |              |             |             |             |
| RNF26        | RNF26        | 5414.643225 | 5326.033958 | 3433.27016  |
| 5073.471939  |              |             |             |             |
| SYT16        | SYT16        | 0           | 4.460240545 | 0           |
| TSPAN7       | TSPAN7       | 7.291747321 | 5.282017149 | 13.38072164 |
| 31.38432284  |              |             |             |             |
| CEP95        | CEP95        | 1357.30668  | 1211.342599 | 1580.040213 |
| 1325.00688   |              |             |             |             |
| LRRC16B      | LRRC16B      | 39.58377117 | 28.17075813 | 3.345180409 |
| 34.3266031   |              |             |             |             |
| UBE2E2       | UBE2E2       | 247.9194089 | 182.2295916 | 412.5722504 |
| 422.7075982  |              |             |             |             |
| INSIG1       | INSIG1       | 8246.96622  | 22276.90732 | 5516.202494 |
| 10956.07095  |              |             |             |             |
| LOC101927314 | LOC101927314 |             | 0           | 2.641008574 |
| 0.980760089  |              |             |             | 0           |
| IGFBP7       | IGFBP7       | 363.5456879 | 403.1939757 | 403.6517693 |
| 420.746078   |              |             |             |             |
| DNAJC9       | DNAJC9       | 13755.36048 | 10824.61381 | 9340.858761 |
| 9324.086163  |              |             |             |             |
| ARHGAP30     | ARHGAP30     |             | 19961.67913 | 22809.51072 |
| 11728.20251  | 16472.84645  |             |             |             |

|              |              |             |             |             |             |
|--------------|--------------|-------------|-------------|-------------|-------------|
| TMC04        | TMC04        | 1154.179433 | 1067.8478   | 918.8095523 |             |
| 1169.066026  |              |             |             |             |             |
| ITGB8        | ITGB8        | 25.00027653 | 41.375801   | 12.2656615  |             |
| 14.71140133  |              |             |             |             |             |
| KAZN         | KAZN         | 10.41678189 | 29.93143051 | 36.7969845  |             |
| 35.30736319  |              |             |             |             |             |
| MOV10        | MOV10        | 5280.266739 | 6426.454197 | 7121.88909  |             |
| 7147.779526  |              |             |             |             |             |
| SMIM3        | SMIM3        | 1471.891281 | 890.0198895 | 1286.779397 |             |
| 1289.699517  |              |             |             |             |             |
| ZNF833P      | ZNF833P      | 2.083356377 | 7.923025723 | 0           | 0           |
| LINC00861    | LINC00861    |             | 225.0024888 | 448.9714576 |             |
| 1497.525763  | 593.3598536  |             |             |             |             |
| THRSP        | THRSP        | 19.79188559 | 7.923025723 | 13.38072164 |             |
| 10.78836098  |              |             |             |             |             |
| EIF2B1       | EIF2B1       | 9824.066998 | 6744.255563 | 7098.472827 |             |
| 7306.662661  |              |             |             |             |             |
| CHUK         | CHUK         | 6154.234739 | 5061.052765 | 4863.892314 |             |
| 4147.634415  |              |             |             |             |             |
| THOP1        | THOP1        | 6211.527039 | 5050.48873  | 4018.676731 |             |
| 4614.476217  |              |             |             |             |             |
| MBOAT7       | MBOAT7       | 1885.437522 | 2676.222022 | 2046.13535  |             |
| 1988.0007    |              |             |             |             |             |
| LOC100132831 | LOC100132831 |             | 3.125034566 | 0.880336191 | 0           |
| 0            |              |             |             |             |             |
| FBX027       | FBX027       | 80.20922053 | 8.803361914 | 52.4078264  |             |
| 32.36508293  |              |             |             |             |             |
| PGK1         | PGK1         | 77236.27098 | 64570.89897 | 56658.43564 |             |
| 83215.532    |              |             |             |             |             |
| SAP30        | SAP30        | 1527.100225 | 1154.120747 | 935.5354543 |             |
| 986.6446492  |              |             |             |             |             |
| MITD1        | MITD1        | 2636.487496 | 3055.64692  | 3090.946698 |             |
| 3186.489528  |              |             |             |             |             |
| ZNF708       | ZNF708       | 703.1327774 | 644.4060921 | 1087.183633 |             |
| 770.8774297  |              |             |             |             |             |
| EXOSC1       | EXOSC1       | 3854.209298 | 2665.657988 | 3538.085812 |             |
| 3029.567914  |              |             |             |             |             |
| ATP1A1-AS1   | ATP1A1-AS1   |             | 1134.387547 | 1601.331532 |             |
| 1280.089036  | 1177.892866  |             |             |             |             |
| RNU5D-1      | RNU5D-1      | 0           | 0.880336191 | 1.115060136 | 0           |
| RNU5F-1      | RNU5F-1      | 0           | 5.282017149 | 0           | 0.980760089 |
| SNORD44      | SNORD44      | 65.62572589 | 19.36739621 | 69.13372845 |             |
| 72.57624656  |              |             |             |             |             |
| PLA1A        | PLA1A        | 21.87524196 | 3.521344766 | 3.345180409 |             |
| 2.942280266  |              |             |             |             |             |
| C7orf61      | C7orf61      | 7.291747321 | 36.09378385 | 36.7969845  |             |
| 15.69216142  |              |             |             |             |             |
| RIOK1        | RIOK1        | 4744.84415  | 2990.502042 | 4749.04112  |             |
| 4316.32515   |              |             |             |             |             |
| MARVELD1     | MARVELD1     |             | 75.00082959 | 105.640343  |             |

|             |             |             |             |             |             |
|-------------|-------------|-------------|-------------|-------------|-------------|
| 75.82408927 |             | 107.8836098 |             |             |             |
| IL17C       | IL17C       | 0           | 0           | 1.115060136 | 7.846080709 |
| CHRAC1      | CHRAC1      | 3004.199896 |             | 3157.765919 | 3059.725014 |
| 3045.260075 |             |             |             |             |             |
| POLE3       | POLE3       | 13242.85481 |             | 9951.320308 | 10123.63098 |
| 9845.85053  |             |             |             |             |             |
| GSAP        | GSAP        | 166.6685102 |             | 224.4857288 | 211.8614259 |
| 326.5931095 |             |             |             |             |             |
| DNAJC2      | DNAJC2      | 2357.317741 |             | 1826.697597 | 2593.629877 |
| 2336.170531 |             |             |             |             |             |
| LYRM1       | LYRM1       | 2165.648954 |             | 1516.819258 | 2136.455221 |
| 1727.118516 |             |             |             |             |             |
| MED15       | MED15       | 4315.672736 |             | 4816.319303 | 4994.35435  |
| 4588.976455 |             |             |             |             |             |
| LINC01315   | LINC01315   |             |             | 2.083356377 | 2.641008574 |
| 1.115060136 | 0.980760089 |             |             |             |             |
| SMAD1       | SMAD1       | 303.1283529 |             | 375.9035537 | 151.6481785 |
| 223.6133002 |             |             |             |             |             |
| FOXN3       | FOXN3       | 3459.413265 |             | 3061.809274 | 3176.806328 |
| 3313.98834  |             |             |             |             |             |
| SPINT1      | SPINT1      | 209.3773159 |             | 189.2722812 | 286.570455  |
| 605.1289747 |             |             |             |             |             |
| CA9         | CA9         | 0           | 0.880336191 | 13.38072164 | 34.3266031  |
| CCDC89      | CCDC89      | 0           | 0           | 1.115060136 | 0           |
| PARD6G      | PARD6G      | 83.3342551  |             | 105.640343  | 27.87650341 |
| 47.07648426 |             |             |             |             |             |
| PGBD1       | PGBD1       | 211.4606723 |             | 161.101523  | 173.9493813 |
| 152.0178137 |             |             |             |             |             |
| GPN3        | GPN3        | 4040.669694 |             | 3336.474166 | 3630.635804 |
| 3861.252469 |             |             |             |             |             |
| KRT12       | KRT12       | 0           | 2.641008574 | 0           | 0           |
| KCNK5       | KCNK5       | 1355.223324 |             | 1642.707333 | 924.384853  |
| 1299.507117 |             |             |             |             |             |
| DCHS1       | DCHS1       | 3.125034566 |             | 29.93143051 | 182.8698623 |
| 95.1337286  |             |             |             |             |             |
| APOE        | APOE        | 3.125034566 |             | 5.282017149 | 6.690360818 |
| 4.903800443 |             |             |             |             |             |
| ANKRD53     | ANKRD53     | 4.166712755 |             | 2.641008574 | 7.805420954 |
| 5.884560532 |             |             |             |             |             |
| TMEM81      | TMEM81      | 13.54181645 |             | 24.64941336 | 35.68192436 |
| 21.57672195 |             |             |             |             |             |
| DCP1B       | DCP1B       | 1808.353336 |             | 1153.240411 | 2333.820865 |
| 1318.141559 |             |             |             |             |             |
| AP2A2       | AP2A2       | 334.3786986 |             | 1257.120081 | 499.546941  |
| 440.3612798 |             |             |             |             |             |
| UGDH-AS1    | UGDH-AS1    |             |             | 16.66685102 | 22.88874098 |
| 51.29276627 | 41.19192372 |             |             |             |             |
| PCCA-AS1    | PCCA-AS1    |             |             | 2.083356377 | 7.042689532 |
| 8.92048109  | 6.865320621 |             |             |             |             |
| MIR4522     | MIR4522     | 3.125034566 |             | 1.760672383 | 0           |
|             |             |             |             |             | 0           |

|              |              |             |             |             |             |
|--------------|--------------|-------------|-------------|-------------|-------------|
| LOC100129617 | LOC100129617 | 0           | 0.880336191 | 6.690360818 |             |
|              | 1.961520177  |             |             |             |             |
| MGST1        | MGST1        | 12.50013826 | 17.60672383 | 5.575300681 | 0           |
| EBPL         | EBPL         | 1708.352229 | 1599.57086  | 1208.725188 |             |
|              | 937.6066448  |             |             |             |             |
| FAM27E3      | FAM27E3      | 1.041678189 | 1.760672383 | 1.115060136 |             |
|              | 2.942280266  |             |             |             |             |
| MIR6780B     | MIR6780B     |             | 7.291747321 | 5.282017149 |             |
|              | 4.460240545  | 1.961520177 |             |             |             |
| MIR6845      | MIR6845      | 0           | 1.760672383 | 3.345180409 | 1.961520177 |
| MIR6844      | MIR6844      | 5.208390943 | 3.521344766 | 0           | 0           |
| MIR6835      | MIR6835      | 17.70852921 | 19.36739621 | 14.49578177 |             |
|              | 17.6536816   |             |             |             |             |
| MIR7849      | MIR7849      | 0           | 1.760672383 | 0           | 0           |
| LOC101929625 | LOC101929625 |             | 26.04195472 | 16.72638764 |             |
|              | 90.31987104  | 47.07648426 |             |             |             |
| MIR6831      | MIR6831      | 3.125034566 | 3.521344766 | 8.92048109  |             |
|              | 0.980760089  |             |             |             |             |
| LIN9         | LIN9         | 1681.268597 | 1504.494551 | 1280.089036 |             |
|              | 1195.546548  |             |             |             |             |
| DHX57        | DHX57        | 920.8435188 | 1587.246153 | 952.2613564 |             |
|              | 999.3945304  |             |             |             |             |
| UBA6         | UBA6         | 5445.893571 | 6021.499549 | 4024.252032 |             |
|              | 5126.432983  |             |             |             |             |
| MAGI2        | MAGI2        | 0           | 2.641008574 | 4.460240545 | 3.923040355 |
| ASB2         | ASB2         | 12956.39331 | 8228.502381 | 3597.184    |             |
|              | 3735.715178  |             |             |             |             |
| STK17A       | STK17A       | 10068.86137 | 10317.54016 | 10742.48935 |             |
|              | 10471.57547  |             |             |             |             |
| HEPHL1       | HEPHL1       | 8.33342551  | 0.880336191 | 12.2656615  | 0           |
| SKA2         | SKA2         | 3179.201832 | 3943.906138 | 2173.252206 |             |
|              | 2533.303309  |             |             |             |             |
| MLF1         | MLF1         | 42.70880574 | 36.97412004 | 100.3554123 |             |
|              | 121.614251   |             |             |             |             |
| LIMD1        | LIMD1        | 1035.42812  | 2765.135977 | 1234.371571 |             |
|              | 1590.792864  |             |             |             |             |
| TTYH2        | TTYH2        | 1053.136649 | 707.7902979 | 308.8716577 |             |
|              | 141.2294528  |             |             |             |             |
| PCNA         | PCNA         | 29978.45659 | 25713.73982 | 24827.92899 |             |
|              | 21149.11055  |             |             |             |             |
| CASC1        | CASC1        | 19.79188559 | 57.22185244 | 33.45180409 |             |
|              | 53.94180488  |             |             |             |             |
| FURIN        | FURIN        | 39666.06375 | 43058.12346 | 13473.27163 |             |
|              | 32231.69955  |             |             |             |             |
| LINC01413    | LINC01413    |             | 0           | 0           | 0.980760089 |
| PRDX6        | PRDX6        | 6452.154701 | 5914.098534 | 6639.068051 |             |
|              | 6409.267179  |             |             |             |             |
| PVRL2        | PVRL2        | 0           | 4.401680957 | 66.90360818 | 43.1534439  |
| SEMA5A       | SEMA5A       | 0           | 5.282017149 | 0           | 11.76912106 |
| NDUFA7       | NDUFA7       | 3809.417136 | 4459.783146 | 2797.685882 |             |



|                 |               |  |             |             |   |
|-----------------|---------------|--|-------------|-------------|---|
| 3149.220645     |               |  |             |             |   |
| APOBEC3B        | APOBEC3B      |  | 2540.653102 | 4149.02447  |   |
| 993.5185814     | 1733.003077   |  |             |             |   |
| GNG7 GNG7       | 5.208390943   |  | 40.49546481 | 90.31987104 |   |
| 89.24916807     |               |  |             |             |   |
| FHAD1 FHAD1     | 0 0.880336191 |  | 1.115060136 | 0           |   |
| SLK SLK         | 4876.095601   |  | 4152.545815 | 4282.945983 |   |
| 4267.287146     |               |  |             |             |   |
| PCDHGA2 PCDHGA2 | 5.208390943   |  | 4.401680957 | 45.71746559 |   |
| 10.78836098     |               |  |             |             |   |
| TEKT3 TEKT3     | 0 0.880336191 |  | 0           | 0           |   |
| ARHGAP25        | ARHGAP25      |  | 9059.475207 | 7122.800125 |   |
| 10317.65144     | 8170.712299   |  |             |             |   |
| RTN3 RTN3       | 6836.533952   |  | 5184.299831 | 4371.035734 |   |
| 4110.365532     |               |  |             |             |   |
| LOC101927239    | LOC101927239  |  | 0 0         | 1.115060136 | 0 |
| BTBD19 BTBD19   | 42.70880574   |  | 51.0594991  | 24.531323   |   |
| 78.46080709     |               |  |             |             |   |
| CDC7 CDC7       | 2233.358037   |  | 2746.648917 | 1306.85048  |   |
| 1953.674097     |               |  |             |             |   |
| RIPK4 RIPK4     | 15.62517283   |  | 7.923025723 | 37.91204463 |   |
| 18.63444168     |               |  |             |             |   |
| KIF1B KIF1B     | 2168.773989   |  | 2542.410921 | 1842.079345 |   |
| 1361.295003     |               |  |             |             |   |
| SLC16A13        | SLC16A13      |  | 710.4245247 | 251.7761508 |   |
| 499.546941      | 140.2486927   |  |             |             |   |
| TSPAN9 TSPAN9   | 2.083356377   |  | 2.641008574 | 8.92048109  |   |
| 20.59596186     |               |  |             |             |   |
| GALK1 GALK1     | 1677.101884   |  | 2140.097281 | 1070.457731 |   |
| 2146.883834     |               |  |             |             |   |
| COX7A2 COX7A2   | 15039.74969   |  | 17203.52985 | 13232.41864 |   |
| 12163.38662     |               |  |             |             |   |
| AHCY AHCY       | 6030.275034   |  | 4975.660154 | 4707.783895 |   |
| 5236.278113     |               |  |             |             |   |
| CCNT2 CCNT2     | 2107.314976   |  | 2256.301659 | 2676.144327 |   |
| 2453.861742     |               |  |             |             |   |
| SFRP4 SFRP4     | 0 2.641008574 |  | 0           | 5.884560532 |   |
| CILP2 CILP2     | 18.7502074    |  | 19.36739621 | 14.49578177 |   |
| 109.8451299     |               |  |             |             |   |
| EZH1 EZH1       | 958.3439336   |  | 1143.556713 | 2030.524508 |   |
| 1556.466261     |               |  |             |             |   |
| NDUFC2-KCTD14   | NDUFC2-KCTD14 |  | 7865.712003 | 6915.040784 |   |
| 4663.18149      | 4815.532035   |  |             |             |   |
| ARHGEF9 ARHGEF9 | 382.2958953   |  | 866.2508124 | 526.3083843 |   |
| 520.7836071     |               |  |             |             |   |
| TLE1 TLE1       | 4.166712755   |  | 37.85445623 | 15.61084191 |   |
| 32.36508293     |               |  |             |             |   |
| MMP9 MMP9       | 30.20866747   |  | 3.521344766 | 3.345180409 |   |
| 9.807600887     |               |  |             |             |   |
| KCNA2 KCNA2     | 60.41733494   |  | 126.7684116 | 1.115060136 |   |

|             |          |             |             |             |
|-------------|----------|-------------|-------------|-------------|
| 12.74988115 |          |             |             |             |
| JARID2      | JARID2   | 1884.395843 | 3681.565953 | 1371.523968 |
| 2181.210437 |          |             |             |             |
| TLL1        | TLL1     | 2.083356377 | 0           | 1.115060136 |
| MC3R        | MC3R     | 0           | 0           | 3.923040355 |
| SMDT1       | SMDT1    | 2441.693674 | 2.230120273 | 0           |
| 1876.19405  |          |             | 2214.925858 | 1955.815479 |
| PDZD8       | PDZD8    | 820.8424127 | 854.8064419 | 855.2511245 |
| 805.2040328 |          |             |             |             |
| MAGEA6      | MAGEA6   | 1.041678189 | 0           | 0           |
| DNMT3L      | DNMT3L   | 1.041678189 | 0           | 0           |
| TTC23       | TTC23    | 52.08390943 | 139.0931182 | 7.805420954 |
| 146.1332532 |          |             |             |             |
| PUS10       | PUS10    | 802.0922053 | 441.0484319 | 588.7517519 |
| 583.5522528 |          |             |             |             |
| BET1        | BET1     | 1883.354165 | 1555.55405  | 1836.504044 |
| 1546.65866  |          |             |             |             |
| PRSS16      | PRSS16   | 16.66685102 | 20.2477324  | 21.18614259 |
| 14.71140133 |          |             |             |             |
| CYB5D2      | CYB5D2   | 613.5484531 | 549.3297835 | 578.7162107 |
| 667.8976204 |          |             |             |             |
| COL25A1     | COL25A1  | 0           | 0           | 1.961520177 |
| NOXA1       | NOXA1    | 3.125034566 | 5.282017149 | 4.460240545 |
| 50.99952461 |          |             |             |             |
| ENG         | ENG      | 1082.303638 | 1364.521097 | 1053.731829 |
| 1266.161274 |          |             |             |             |
| IL17RE      | IL17RE   | 7.291747321 | 5.282017149 | 5.575300681 |
| 47.07648426 |          |             |             |             |
| GTF2H2      | GTF2H2   | 1080.220282 | 431.3647338 | 977.9077395 |
| 740.4738669 |          |             |             |             |
| TBPL1       | TBPL1    | 1463.557855 | 1122.428644 | 1564.429371 |
| 1226.930871 |          |             |             |             |
| SYP         | SYP      | 36.4587366  | 44.01680957 | 103.7005927 |
| 108.8643698 |          |             |             |             |
| PFN1        | PFN1     | 180425.954  | 150688.9066 | 88762.13203 |
| 116899.7372 |          |             |             |             |
| LIPE        | LIPE     | 175.0019357 | 490.3472586 | 277.6499739 |
| 238.3247015 |          |             |             |             |
| RAD51AP1    | RAD51AP1 |             | 2138.565321 | 2021.251896 |
| 1117.290257 |          | 1592.754384 |             |             |
| DTHD1       | DTHD1    | 69.79243864 | 36.97412004 | 34.56686422 |
| 102.9798093 |          |             |             |             |
| CD86        | CD86     | 1513.558408 | 1540.588335 | 437.1035734 |
| 342.2852709 |          |             |             |             |
| PPP1R3F     | PPP1R3F  | 223.9608106 | 281.7075813 | 313.3318983 |
| 313.8432284 |          |             |             |             |
| PNLIP       | PNLIP    | 0           | 1.115060136 | 0           |
| SEPW1       | SEPW1    | 3638.581913 | 3311.824752 | 2504.425066 |
| 2920.703544 |          |             |             |             |
| GPATCH2     | GPATCH2  | 551.0477618 | 478.022552  | 449.3692349 |

|             |             |             |             |             |
|-------------|-------------|-------------|-------------|-------------|
| 468.8033224 |             |             |             |             |
| PDP2        | PDP2        | 789.592067  | 1000.061913 | 885.3577482 |
| 1052.355575 |             |             |             |             |
| USP32       | USP32       | 893.7598859 | 1792.364486 | 932.1902739 |
| 1015.086692 |             |             |             |             |
| FAM124A     | FAM124A     | 16.66685102 | 13.20504287 | 8.92048109  |
| 7.846080709 |             |             |             |             |
| EDA2R       | EDA2R       | 294.7949274 | 118.8453858 | 470.5553775 |
| 161.8254146 |             |             |             |             |
| PITRM1      | PITRM1      | 8798.013982 | 6202.848805 | 8505.678719 |
| 7215.451972 |             |             |             |             |
| DHX33       | DHX33       | 308.3367439 | 517.6376806 | 343.438522  |
| 381.5156745 |             |             |             |             |
| LINC01137   | LINC01137   |             | 145.8349464 | 174.3065659 |
| 262.039132  | 309.920188  |             |             |             |
| PHLDA2      | PHLDA2      | 91.66768061 | 114.4437049 | 211.8614259 |
| 352.0928718 |             |             |             |             |
| KLHL33      | KLHL33      | 0           | 0.880336191 | 4.460240545 |
| 0           | 0           |             |             |             |
| SMPD2       | SMPD2       | 1122.929087 | 734.2003837 | 723.6740284 |
| 816.9731539 |             |             |             |             |
| DNAAF2      | DNAAF2      | 2321.900683 | 1605.733213 | 2084.047395 |
| 2251.825164 |             |             |             |             |
| VPS37B      | VPS37B      | 1042.719867 | 1452.554716 | 1533.207687 |
| 1213.20023  |             |             |             |             |
| MAN1A2      | MAN1A2      | 1758.352783 | 2049.422654 | 1834.273924 |
| 1783.021841 |             |             |             |             |
| GL01        | GL01        | 18399.16185 | 15006.21072 | 11663.52903 |
| 14761.42009 |             |             |             |             |
| GAL3ST1     | GAL3ST1     | 0           | 0           | 17.84096218 |
| 0           | 0           |             |             | 4.903800443 |
| TM6SF1      | TM6SF1      | 501.0472088 | 752.6874437 | 259.8090118 |
| 136.3256523 |             |             |             |             |
| COR01A      | COR01A      | 98288.58717 | 97883.70079 | 39933.64866 |
| 66457.28437 |             |             |             |             |
| RPL36       | RPL36       | 10540.74159 | 12326.46735 | 12260.0862  |
| 12059.42605 |             |             |             |             |
| HEXIM2      | HEXIM2      | 278.1280764 | 236.8104355 | 370.1999652 |
| 199.094298  |             |             |             |             |
| ZNF782      | ZNF782      | 154.1683719 | 161.101523  | 170.6042008 |
| 146.1332532 |             |             |             |             |
| ZNF425      | ZNF425      | 78.12586415 | 69.54655912 | 142.7276974 |
| 126.5180514 |             |             |             |             |
| GLE1        | GLE1        | 8059.464146 | 6759.221278 | 6635.722871 |
| 7018.319195 |             |             |             |             |
| PPP1R16B    | PPP1R16B    |             | 12207.42669 | 24262.06544 |
| 11754.96396 | 17334.93457 |             |             |             |
| C9orf172    | C9orf172    |             | 3.125034566 | 16.72638764 |
| 43.48734531 | 14.71140133 |             |             |             |
| TTLL5       | TTLL5       | 1526.058546 | 1586.365817 | 1278.973976 |
| 1402.486927 |             |             |             |             |
| TDRD7       | TDRD7       | 2433.360249 | 979.8141811 | 3674.123149 |

|             |          |             |             |             |             |
|-------------|----------|-------------|-------------|-------------|-------------|
| 1927.193574 |          |             |             |             |             |
| CSNK1G1     | CSNK1G1  | 2566.695057 | 3029.236835 | 2505.540126 |             |
| 2060.576946 |          |             |             |             |             |
| ITPA        | ITPA     | 3059.40884  | 3158.646255 | 2091.852816 |             |
| 3079.586678 |          |             |             |             |             |
| NEUROD2     | NEUROD2  | 0           | 0           | 0.980760089 |             |
| C11orf94    | C11orf94 |             | 3.125034566 | 4.401680957 |             |
| 5.575300681 |          | 0.980760089 |             |             |             |
| TBCE        | TBCE     | 2341.692568 | 1580.203464 | 1545.473349 |             |
| 1557.447021 |          |             |             |             |             |
| INPP5K      | INPP5K   | 4352.131472 | 3292.457356 | 4476.966447 |             |
| 3144.316844 |          |             |             |             |             |
| BANP        | BANP     | 1312.514518 | 871.5328295 | 1307.96554  |             |
| 1100.412819 |          |             |             |             |             |
| PTPRA       | PTPRA    | 6127.151106 | 6291.76276  | 5193.950115 |             |
| 5505.987138 |          |             |             |             |             |
| PRKCD       | PRKCD    | 3190.660292 | 1738.663978 | 4068.854437 |             |
| 2812.819934 |          |             |             |             |             |
| RFTN2       | RFTN2    | 4.166712755 | 0           | 3.345180409 | 9.807600887 |
| TMEM125     | TMEM125  | 0           | 0           | 6.865320621 |             |
| ZNF333      | ZNF333   | 592.7148894 | 416.3990186 | 963.4119577 |             |
| 807.165553  |          |             |             |             |             |
| ALOX5       | ALOX5    | 15.62517283 | 40.49546481 | 168.3740806 |             |
| 82.38384745 |          |             |             |             |             |
| DDX54       | DDX54    | 4579.217318 | 3960.632525 | 4762.421842 |             |
| 4571.322773 |          |             |             |             |             |
| BCAS4       | BCAS4    | 473.9635759 | 539.6460854 | 766.0463136 |             |
| 784.6080709 |          |             |             |             |             |
| ABT1        | ABT1     | 7295.914034 | 5102.428566 | 6622.342149 |             |
| 6185.653879 |          |             |             |             |             |
| SSX3        | SSX3     | 0           | 1.115060136 | 0           |             |
| RGL4        | RGL4     | 1169.804606 | 1402.375553 | 545.2644066 |             |
| 858.1650776 |          |             |             |             |             |
| SDR16C5     | SDR16C5  | 0           | 8.92048109  | 0           |             |
| FAM171B     | FAM171B  | 7.291747321 | 10.5640343  | 2.230120273 |             |
| 3.923040355 |          |             |             |             |             |
| CFAP58      | CFAP58   | 40.62544936 | 47.53815434 | 0           | 34.3266031  |
| C8orf37     | C8orf37  | 105.2094971 | 93.31563629 | 220.781907  |             |
| 140.2486927 |          |             |             |             |             |
| MPP4        | MPP4     | 0           | 1.760672383 | 0           | 5.884560532 |
| RNF13       | RNF13    | 3723.999525 | 2703.512444 | 3730.991216 |             |
| 3105.086441 |          |             |             |             |             |
| CYP26C1     | CYP26C1  | 0           | 1.760672383 | 0           | 0           |
| SNX12       | SNX12    | 123.9597045 | 152.2981611 | 102.5855325 |             |
| 93.17220842 |          |             |             |             |             |
| MGC70870    | MGC70870 |             | 553.1311182 | 638.2437388 |             |
| 799.4981177 |          | 580.6099725 |             |             |             |
| GDAP1       | GDAP1    | 2032.314146 | 1384.768829 | 1196.459526 |             |
| 1295.584077 |          |             |             |             |             |
| NUF2        | NUF2     | 3454.204874 | 3522.225102 | 1620.182378 |             |

|              |              |             |             |             |             |
|--------------|--------------|-------------|-------------|-------------|-------------|
| 2271.440365  |              |             |             |             |             |
| MECOM        | MECOM        | 0           | 11.44437049 | 0           | 0           |
| TMEM236      | TMEM236      | 0           | 1.760672383 | 0           | 1.961520177 |
| LRRRC16A     | LRRRC16A     | 336.4620549 | 296.6732965 |             | 547.4945269 |
| 268.7282643  |              |             |             |             |             |
| IFI44        | IFI44        | 2662.52945  | 1414.70026  |             | 8900.410008 |
| 2502.899746  |              |             |             |             |             |
| ZNF563       | ZNF563       | 272.9196854 | 197.1953069 |             | 856.3661847 |
| 546.2833694  |              |             |             |             |             |
| UBXN2A       | UBXN2A       | 1263.555643 | 1085.454524 |             | 1468.534199 |
| 1068.047737  |              |             |             |             |             |
| RNASE11      | RNASE11      | 3.125034566 | 0           | 0           | 0           |
| MIR3909      | MIR3909      | 2.083356377 | 6.16235334  | 0           | 1.961520177 |
| LINC00565    | LINC00565    | 0           | 4.401680957 |             | 6.690360818 |
| 0            |              |             |             |             |             |
| RAB4A        | RAB4A        | 1618.767905 | 1575.801783 |             | 1274.513736 |
| 1435.83277   |              |             |             |             |             |
| MIR5193      | MIR5193      | 332.2953422 | 279.9469089 |             | 245.31323   |
| 342.2852709  |              |             |             |             |             |
| MIR5192      | MIR5192      | 0           | 0           | 1.115060136 | 0           |
| P4HA2-AS1    | P4HA2-AS1    |             |             | 145.8349464 | 87.15328295 |
| 52.4078264   | 81.40308736  |             |             |             |             |
| PAF1         | PAF1         | 4583.38403  | 4016.093705 |             | 3979.649626 |
| 3937.751756  |              |             |             |             |             |
| LOC649352    | LOC649352    |             | 1.041678189 | 0           | 0           |
| LINC00423    | LINC00423    |             | 2.083356377 | 0.880336191 | 0           |
| 11.15060136  | 0            |             |             |             |             |
| NDFIP2-AS1   | NDFIP2-AS1   |             | 20.83356377 |             | 9.683698106 |
| 10.03554123  | 18.63444168  |             |             |             |             |
| LOC100506325 | LOC100506325 |             | 56.25062219 |             | 51.93983529 |
| 103.7005927  | 113.7681703  |             |             |             |             |
| C18orf61     | C18orf61     |             | 0           | 5.282017149 | 0           |
| 1.961520177  |              |             |             |             |             |
| CPE          | CPE          | 102.0844625 | 31.69210289 | 0           | 4.903800443 |
| DNAH2        | DNAH2        | 2.083356377 | 4.401680957 | 1.115060136 | 0           |
| ZBTB22       | ZBTB22       | 0           | 14.08537906 | 0           | 6.865320621 |
| CNBP         | CNBP         | 39557.72922 | 28088.88686 |             | 51567.07106 |
| 41025.19451  |              |             |             |             |             |
| C14orf28     | C14orf28     |             | 148.959981  |             | 124.127403  |
| 415.9174308  | 210.8634191  |             |             |             |             |
| PUS3         | PUS3         | 1470.849602 | 1306.418908 |             | 1848.769706 |
| 1512.332057  |              |             |             |             |             |
| SLC39A1      | SLC39A1      | 7911.545843 | 7165.056262 |             | 5467.139848 |
| 7535.179761  |              |             |             |             |             |
| RMND1        | RMND1        | 1563.558961 | 1123.30898  |             | 1387.13481  |
| 1117.085741  |              |             |             |             |             |
| GTPBP10      | GTPBP10      | 1315.639552 | 1177.009488 |             | 1493.065522 |
| 1286.757236  |              |             |             |             |             |
| MIR4723      | MIR4723      | 34.37538023 | 11.44437049 |             | 28.99156354 |
| 30.40356275  |              |             |             |             |             |

|             |             |             |             |             |             |
|-------------|-------------|-------------|-------------|-------------|-------------|
| CCDC168     | CCDC168     | 53.12558762 | 51.93983529 | 54.63794668 |             |
| 46.09572417 |             |             |             |             |             |
| MNAT1       | MNAT1       | 1316.681231 | 1286.171176 | 972.3324388 |             |
| 949.3757658 |             |             |             |             |             |
| CASQ1       | CASQ1       | 2.083356377 | 5.282017149 | 11.15060136 |             |
| 4.903800443 |             |             |             |             |             |
| AP1AR       | AP1AR       | 2289.608659 | 1660.314057 | 3316.188845 |             |
| 2424.438939 |             |             |             |             |             |
| QTRT1       | QTRT1       | 1815.645083 | 1461.358078 | 1336.957103 |             |
| 2407.766018 |             |             |             |             |             |
| ANKRD13C    | ANKRD13C    |             | 3705.249317 | 2699.110763 |             |
| 3648.476766 | 2812.819934 |             |             |             |             |
| DLEU7-AS1   | DLEU7-AS1   |             | 0           | 0.880336191 | 0           |
| 0.980760089 |             |             |             |             |             |
| DENND5B-AS1 | DENND5B-AS1 |             | 0           | 0.880336191 | 0           |
| 2.942280266 |             |             |             |             |             |
| TMEM68      | TMEM68      | 1795.853197 | 1235.992013 | 1425.046854 |             |
| 1063.143936 |             |             |             |             |             |
| RNGTT       | RNGTT       | 3376.07901  | 3190.338358 | 3099.867179 |             |
| 3398.333707 |             |             |             |             |             |
| ZDHHC20     | ZDHHC20     | 3843.792516 | 5116.513945 | 3049.689473 |             |
| 3322.81518  |             |             |             |             |             |
| HUS1B       | HUS1B       | 18.7502074  | 15.84605145 | 22.30120273 |             |
| 6.865320621 |             |             |             |             |             |
| TLR8        | TLR8        | 1.041678189 | 0           | 0           | 0           |
| CCDC110     | CCDC110     | 0           | 0           | 10.03554123 | 15.69216142 |
| RRNAD1      | RRNAD1      | 528.1308417 | 857.4474505 | 496.2017606 |             |
| 492.3415645 |             |             |             |             |             |
| EIF1AX-AS1  | EIF1AX-AS1  |             | 15.62517283 | 8.803361914 |             |
| 20.07108245 | 2.942280266 |             |             |             |             |
| CENPA       | CENPA       | 3937.543553 | 3438.593164 | 1825.353443 |             |
| 2254.767444 |             |             |             |             |             |
| PTPRS       | PTPRS       | 5.208390943 | 11.44437049 | 2.230120273 |             |
| 11.76912106 |             |             |             |             |             |
| SMIM24      | SMIM24      | 3.125034566 | 16.72638764 | 24.531323   |             |
| 10.78836098 |             |             |             |             |             |
| C19orf38    | C19orf38    |             | 82.29257691 | 86.27294676 |             |
| 100.3554123 | 72.57624656 |             |             |             |             |
| APBA1       | APBA1       | 1173.971319 | 1379.486812 | 351.2439429 |             |
| 116.7104506 |             |             |             |             |             |
| CENPC       | CENPC       | 1869.812349 | 2059.986688 | 2546.797351 |             |
| 2024.288823 |             |             |             |             |             |
| FAM78A      | FAM78A      | 1107.303915 | 2365.463346 | 1089.413753 |             |
| 1111.20118  |             |             |             |             |             |
| SEC14L2     | SEC14L2     | 486.4637141 | 675.2178588 | 857.4812448 |             |
| 811.0885933 |             |             |             |             |             |
| KLHL7       | KLHL7       | 1800.01991  | 1530.024301 | 1919.018495 |             |
| 1543.71638  |             |             |             |             |             |
| LOC341056   | LOC341056   |             | 2.083356377 | 1.760672383 | 0           |
| 0.980760089 |             |             |             |             |             |

|              |              |             |             |             |
|--------------|--------------|-------------|-------------|-------------|
| JPX          | JPX          | 528.1308417 | 397.0316223 | 532.9987451 |
| 334.4391902  |              |             |             |             |
| MTRF1        | MTRF1        | 1187.513135 | 1155.001083 | 916.579432  |
| 980.7600887  |              |             |             |             |
| ATP6V1H      | ATP6V1H      | 2712.530003 | 2034.456938 | 2819.987085 |
| 2202.787159  |              |             |             |             |
| PSENE        | PSENE        | 2073.981274 | 2052.063662 | 1814.202842 |
| 1619.234906  |              |             |             |             |
| BCL7C        | BCL7C        | 1818.770117 | 1547.631025 | 1268.938435 |
| 1648.657709  |              |             |             |             |
| HYAL4        | HYAL4        | 0           | 2.641008574 | 0           |
| 8.826840798  |              |             |             |             |
| ZNF836       | ZNF836       | 281.2531109 | 317.8013651 | 614.3981351 |
| 411.9192372  |              |             |             |             |
| ADH1A        | ADH1A        | 1.041678189 | 0           | 0           |
| 0            |              |             |             |             |
| TMEM164      | TMEM164      | 130.2097736 | 152.2981611 | 141.6126373 |
| 143.1909729  |              |             |             |             |
| ATP6V1A      | ATP6V1A      | 6430.279459 | 5849.833992 | 5361.209135 |
| 5498.141057  |              |             |             |             |
| RNF146       | RNF146       | 989.5942793 | 1121.548308 | 1823.123323 |
| 1424.063649  |              |             |             |             |
| ZNF318       | ZNF318       | 603.1316713 | 871.5328295 | 815.1089596 |
| 714.9741046  |              |             |             |             |
| PIBF1        | PIBF1        | 1012.511199 | 998.3012411 | 1229.91133  |
| 1269.103555  |              |             |             |             |
| TRAPPC8      | TRAPPC8      | 2667.737841 | 3803.052347 | 2285.873279 |
| 3054.086916  |              |             |             |             |
| AXIN2        | AXIN2        | 72.91747321 | 133.8111011 | 525.1933242 |
| 246.1707823  |              |             |             |             |
| COIL         | COIL         | 1675.018527 | 1587.246153 | 1459.613718 |
| 1699.657234  |              |             |             |             |
| OVOL1        | OVOL1        | 8.33342551  | 0           | 10.03554123 |
| 14.71140133  |              |             |             |             |
| DENND2D      | DENND2D      | 6168.818233 | 5051.369066 | 7987.175756 |
| 11531.77712  |              |             |             |             |
| DPY19L1      | DPY19L1      | 1093.762098 | 1471.041776 | 613.2830749 |
| 1216.14251   |              |             |             |             |
| LOC100422556 | LOC100422556 | 3.125034566 | 5.282017149 |             |
| 5.575300681  | 5.884560532  |             |             |             |
| HCN1         | HCN1         | 0           | 0           | 1.115060136 |
| 0            |              |             |             |             |
| HIAT1        | HIAT1        | 8288.633347 | 6576.11135  | 8884.799166 |
| 8347.249115  |              |             |             |             |
| ZMYM3        | ZMYM3        | 208.3356377 | 366.2198556 | 205.1710651 |
| 280.4973854  |              |             |             |             |
| TSHZ1        | TSHZ1        | 129.1680954 | 327.4850632 | 507.352362  |
| 211.8441792  |              |             |             |             |
| CITED2       | CITED2       | 308.3367439 | 648.8077731 | 376.8903261 |
| 309.920188   |              |             |             |             |
| MT1X         | MT1X         | 2398.984869 | 2091.678791 | 2021.604027 |
| 1829.117565  |              |             |             |             |
| H1FX         | H1FX         | 1941.688144 | 5686.09146  | 2824.447325 |
| 2964.837748  |              |             |             |             |

|                |                |             |             |             |             |
|----------------|----------------|-------------|-------------|-------------|-------------|
| DNAAF3         | DNAAF3         | 1.041678189 | 0           | 1.115060136 | 0.980760089 |
| RAB11FIP3      | RAB11FIP3      | 382.2958953 |             | 710.4313065 |             |
| 516.2728431    | 734.5893064    |             |             |             |             |
| TNFSF13        | TNFSF13        | 305.2117093 | 135.5717735 | 246.4282901 |             |
| 156.9216142    |                |             |             |             |             |
| GFOD1          | GFOD1          | 440.6298738 | 656.7307988 | 340.0933416 |             |
| 787.5503512    |                |             |             |             |             |
| LZTS1-AS1      | LZTS1-AS1      | 3.125034566 | 0           | 0           |             |
| 0.980760089    |                |             |             |             |             |
| HXA10-AS       | HXA10-AS       | 1.041678189 | 1.760672383 |             |             |
| 8.92048109     | 6.865320621    |             |             |             |             |
| LINC00854      | LINC00854      | 25.00027653 | 14.08537906 |             |             |
| 23.41626286    | 15.69216142    |             |             |             |             |
| LINC00907      | LINC00907      | 0           | 0           | 1.115060136 |             |
| 0.980760089    |                |             |             |             |             |
| DHX32          | DHX32          | 2355.234385 | 2491.351422 | 2142.030522 |             |
| 3417.948909    |                |             |             |             |             |
| EP300          | EP300          | 2954.199343 | 4788.148545 | 4073.314678 |             |
| 3024.664113    |                |             |             |             |             |
| NTN1           | NTN1           | 1.041678189 | 4.401680957 | 6.690360818 |             |
| 4.903800443    |                |             |             |             |             |
| GDF15          | GDF15          | 0           | 5.282017149 | 2.230120273 | 14.71140133 |
| NAT14          | NAT14          | 151.0433374 | 287.8699346 | 147.187938  |             |
| 200.0750581    |                |             |             |             |             |
| BLACAT1        | BLACAT1        | 9.375103698 | 9.683698106 | 0           | 31.38432284 |
| ARHGAP19-SLIT1 | ARHGAP19-SLIT1 | 1986.480306 | 2008.046853 |             |             |
| 1078.263152    | 1555.485501    |             |             |             |             |
| LOC100506469   | LOC100506469   | 1040.636511 | 951.6434229 |             |             |
| 1043.696288    | 1264.199754    |             |             |             |             |
| LING04         | LING04         | 1.041678189 | 18.48706002 | 1.115060136 |             |
| 22.55748204    |                |             |             |             |             |
| ETNK1          | ETNK1          | 4906.304269 | 4767.020477 | 4817.059789 |             |
| 4151.557455    |                |             |             |             |             |
| LOC101927132   | LOC101927132   | 1.041678189 | 0           | 0           |             |
| 0.980760089    |                |             |             |             |             |
| LOC101926892   | LOC101926892   | 0           | 11.44437049 | 0           |             |
| 22.55748204    |                |             |             |             |             |
| TP63           | TP63           | 62.50069132 | 195.4346345 | 26.76144327 |             |
| 51.9802847     |                |             |             |             |             |
| CLCN3          | CLCN3          | 2418.776754 | 2473.744698 | 2365.042549 |             |
| 2220.440841    |                |             |             |             |             |
| RAB14          | RAB14          | 9275.102592 | 7572.651919 | 9290.681055 |             |
| 7671.505414    |                |             |             |             |             |
| FCGR2A         | FCGR2A         | 2.083356377 | 0           | 0           | 0           |
| PILRA          | PILRA          | 7.291747321 | 1.760672383 | 15.61084191 |             |
| 19.61520177    |                |             |             |             |             |
| RNF207         | RNF207         | 271.8780073 | 441.0484319 | 114.851194  |             |
| 310.9009481    |                |             |             |             |             |
| MOK            | MOK            | 138.5431991 | 50.17916291 | 93.66505145 |             |
| 47.07648426    |                |             |             |             |             |



|                 |               |               |               |  |
|-----------------|---------------|---------------|---------------|--|
| C15orf48        | C15orf48      | 7.291747321   | 10.5640343    |  |
| 17.84096218     | 31.38432284   |               |               |  |
| ANKEF1 ANKEF1   | 577.0897165   | 552.8511282   | 423.7228518   |  |
| 565.8985712     |               |               |               |  |
| RPP25 RPP25     | 926.0519098   | 1012.38662    | 737.0547501   |  |
| 811.0885933     |               |               |               |  |
| DUS2 DUS2       | 3209.410499   | 2210.524177   | 2088.507635   |  |
| 2311.651529     |               |               |               |  |
| ADAT3 ADAT3     | 405.2128154   | 583.6628949   | 263.1541922   |  |
| 409.9577171     |               |               |               |  |
| SAAL1 SAAL1     | 3655.248764   | 2694.709082   | 2256.881716   |  |
| 2296.940128     |               |               |               |  |
| IP05 IP05       | 12193.88488   | 11525.36142   | 10664.43514   |  |
| 12122.1947      |               |               |               |  |
| SPRYD3 SPRYD3   | 3490.66361    | 2945.604897   | 3804.585185   |  |
| 4067.212088     |               |               |               |  |
| EDNRA EDNRA     | 0 0           | 0 4.903800443 |               |  |
| GALP GALP       | 0 0.880336191 | 0 0           |               |  |
| LOC101928069    | LOC101928069  | 102.0844625   | 125.0077392   |  |
| 136.0373366     | 154.960094    |               |               |  |
| LOC102723895    | LOC102723895  | 0 0           | 0 0.980760089 |  |
| YPEL1 YPEL1     | 793.7587798   | 1235.111677   | 758.2408927   |  |
| 764.9928692     |               |               |               |  |
| SPTSSA SPTSSA   | 1723.977402   | 3715.018728   | 1702.696828   |  |
| 2060.576946     |               |               |               |  |
| MCM7 MCM7       | 48757.83098   | 42816.91134   | 30364.20257   |  |
| 39463.82445     |               |               |               |  |
| PCY0X1L PCY0X1L | 2459.402204   | 1646.228678   | 1316.886021   |  |
| 1380.910205     |               |               |               |  |
| SMIM7 SMIM7     | 3291.703076   | 2372.506036   | 2717.401552   |  |
| 2252.805924     |               |               |               |  |
| MRPS34 MRPS34   | 7786.544461   | 5398.221526   | 4984.318809   |  |
| 5439.295452     |               |               |               |  |
| CHST5 CHST5     | 1.041678189   | 0 3.345180409 | 10.78836098   |  |
| FAM46C FAM46C   | 2433.360249   | 5214.231262   | 1393.82517    |  |
| 2201.806399     |               |               |               |  |
| WDR55 WDR55     | 4006.294314   | 2861.092622   | 3802.355065   |  |
| 3700.407815     |               |               |               |  |
| TMPRSS11E       | TMPRSS11E     | 0 0           | 3.345180409 0 |  |
| FAM84B FAM84B   | 168.7518666   | 211.2806859   | 1353.683005   |  |
| 587.4752931     |               |               |               |  |
| TCTE3 TCTE3     | 11.45846008   | 7.042689532   | 10.03554123   |  |
| 7.846080709     |               |               |               |  |
| LRCH3 LRCH3     | 2101.064907   | 1781.800451   | 1767.370316   |  |
| 2195.921839     |               |               |               |  |
| TRIM52 TRIM52   | 520.8390943   | 736.8413922   | 1029.200506   |  |
| 828.7422749     |               |               |               |  |
| STIM2 STIM2     | 2767.738947   | 2430.608225   | 3051.919593   |  |
| 2595.091195     |               |               |               |  |
| ZNF496 ZNF496   | 308.3367439   | 225.366065    | 671.266202    |  |

|                 |             |   |             |             |   |
|-----------------|-------------|---|-------------|-------------|---|
| 473.7071228     |             |   |             |             |   |
| PYROXD2 PYROXD2 | 57.29230038 |   | 81.8712658  | 24.531323   |   |
| 35.30736319     |             |   |             |             |   |
| ACTA2-AS1       | ACTA2-AS1   |   | 568.756291  | 438.4074233 |   |
| 1033.660746     | 855.2227973 |   |             |             |   |
| MRPS31 MRPS31   | 2519.819538 |   | 2073.191731 | 2096.313056 |   |
| 2571.552952     |             |   |             |             |   |
| SNORD116-6      | SNORD116-6  | 0 | 0           | 3.345180409 | 0 |
| SNORD116-5      | SNORD116-5  | 0 | 0           | 2.230120273 | 0 |
| FAM81A FAM81A   | 92.70935879 |   | 36.97412004 | 21.18614259 |   |
| 26.48052239     |             |   |             |             |   |
| ZNF417 ZNF417   | 267.7112945 |   | 264.1008574 | 438.2186336 |   |
| 407.0154368     |             |   |             |             |   |
| C12orf66        | C12orf66    |   | 522.9224507 | 501.7916291 |   |
| 738.1698102     | 653.1862191 |   |             |             |   |
| RPLP1 RPLP1     | 22738.79318 |   | 31331.16505 | 31923.05664 |   |
| 26556.04092     |             |   |             |             |   |
| B3GALNT2        | B3GALNT2    |   | 2038.564215 | 1980.756431 |   |
| 1723.882971     | 1469.178613 |   |             |             |   |
| CACTIN-AS1      | CACTIN-AS1  |   | 707.2994901 | 713.9526513 |   |
| 544.1493465     | 597.282894  |   |             |             |   |
| DYNLL1-AS1      | DYNLL1-AS1  |   | 413.5462409 | 300.1946413 |   |
| 344.5535821     | 266.7667441 |   |             |             |   |
| LUC7L3 LUC7L3   | 2415.65172  |   | 3198.261383 | 2922.572617 |   |
| 3061.932997     |             |   |             |             |   |
| GTSE1 GTSE1     | 3759.416583 |   | 4472.107853 | 1708.272129 |   |
| 2495.053666     |             |   |             |             |   |
| EEPDP1 EEPDP1   | 283.3364673 |   | 526.4410425 | 99.24035213 |   |
| 177.517576      |             |   |             |             |   |
| SERTAD2 SERTAD2 | 946.8854735 |   | 1047.600068 | 1654.749242 |   |
| 936.6258847     |             |   |             |             |   |
| PIP5K1B PIP5K1B | 1063.553431 |   | 431.3647338 | 272.0746732 |   |
| 214.7864594     |             |   |             |             |   |
| VBP1 VBP1       | 8028.2138   |   | 7450.285188 | 6452.853009 |   |
| 6255.287846     |             |   |             |             |   |
| SRCAP SRCAP     | 2475.027376 |   | 5480.092792 | 3771.133381 |   |
| 3326.738221     |             |   |             |             |   |
| PPP2R2D PPP2R2D | 2003.147157 |   | 1914.731216 | 1935.744397 |   |
| 2002.712101     |             |   |             |             |   |
| SERPINB6        | SERPINB6    |   | 545.8393709 | 573.0988606 |   |
| 2996.166586     | 2928.549625 |   |             |             |   |
| TMCC2 TMCC2     | 160.4184411 |   | 371.5018728 | 105.9307129 |   |
| 310.9009481     |             |   |             |             |   |
| SP5 SP5         | 0 0         | 0 | 0.980760089 |             |   |
| ACAD9 ACAD9     | 3612.539958 |   | 3346.157864 | 2600.320238 |   |
| 3443.448671     |             |   |             |             |   |
| ZNF286A ZNF286A | 627.0902696 |   | 717.473996  | 802.8432981 |   |
| 585.5137729     |             |   |             |             |   |
| ALKBH1 ALKBH1   | 1989.60534  |   | 1560.836067 | 1934.629336 |   |
| 1736.926117     |             |   |             |             |   |

|             |         |             |             |             |
|-------------|---------|-------------|-------------|-------------|
| CFD         | CFD     | 35.41705842 | 61.6235334  | 35.68192436 |
| 85.32612771 |         |             |             |             |
| FNTB        | FNTB    | 1495.849879 | 1256.239745 | 1286.779397 |
| 1424.063649 |         |             |             |             |
| DES         | DES     | 0           | 7.042689532 | 0           |
| PSCA        | PSCA    | 5.208390943 | 2.641008574 | 0           |
| EPM2A       | EPM2A   | 448.9632993 | 314.2800203 | 561.9903087 |
| 485.4762439 |         |             |             |             |
| FGD6        | FGD6    | 123.9597045 | 205.9986688 | 111.5060136 |
| 99.05676896 |         |             |             |             |
| RSAD1       | RSAD1   | 2405.234938 | 1618.05792  | 3100.982239 |
| 2818.704495 |         |             |             |             |
| MEP1B       | MEP1B   | 3.125034566 | 0           | 13.38072164 |
| GATA3       | GATA3   | 6217.777108 | 4467.706172 | 4007.52613  |
| 2675.513522 |         |             |             |             |
| PPIB        | PPIB    | 29231.57333 | 20640.36234 | 19447.76384 |
| 16615.05666 |         |             |             |             |
| SLC2A4      | SLC2A4  | 0           | 2.641008574 | 0           |
| ECT2        | ECT2    | 6527.15553  | 7474.934601 | 2979.440684 |
| 3651.36981  |         |             |             |             |
| PCDHGA7     | PCDHGA7 | 4.166712755 | 4.401680957 | 33.45180409 |
| 10.78836098 |         |             |             |             |
| AN06        | AN06    | 2400.026547 | 3026.595826 | 2351.661827 |
| 3024.664113 |         |             |             |             |
| TNFSF8      | TNFSF8  | 4507.341522 | 1556.434386 | 6736.078283 |
| 3145.297604 |         |             |             |             |
| DI01        | DI01    | 2.083356377 | 3.521344766 | 4.460240545 |
| 1.961520177 |         |             |             |             |
| PLA2G4F     | PLA2G4F | 0           | 0.880336191 | 0           |
| PIN1        | PIN1    | 4602.134238 | 4213.289012 | 2758.658777 |
| 3269.854136 |         |             |             |             |
| KCTD17      | KCTD17  | 896.8849205 | 1089.856205 | 827.3746211 |
| 1076.874577 |         |             |             |             |
| ACVR2B      | ACVR2B  | 45.8338403  | 244.7334612 | 170.6042008 |
| 232.440141  |         |             |             |             |
| ATM         | ATM     | 927.0935879 | 2050.30299  | 2419.680496 |
| 1908.559133 |         |             |             |             |
| UROS        | UROS    | 3346.91202  | 2573.222688 | 2617.04614  |
| 3049.183116 |         |             |             |             |
| TIMD4       | TIMD4   | 95.83439336 | 487.7062501 | 56.86806695 |
| 345.2275512 |         |             |             |             |
| ZNF200      | ZNF200  | 1951.063247 | 1778.279107 | 2111.923898 |
| 1596.677424 |         |             |             |             |
| SENP8       | SENP8   | 126.0430608 | 112.6830325 | 249.7734705 |
| 152.0178137 |         |             |             |             |
| SLC31A2     | SLC31A2 | 812.5089872 | 404.0743119 | 587.6366918 |
| 620.8211361 |         |             |             |             |
| ADCY5       | ADCY5   | 4.166712755 | 6.16235334  | 5.575300681 |
| 2.942280266 |         |             |             |             |
| BTBD9       | BTBD9   | 585.423142  | 595.1072654 | 692.4523446 |

|               |               |             |             |             |   |
|---------------|---------------|-------------|-------------|-------------|---|
| 515.8798066   |               |             |             |             |   |
| EZR           | EZR           | 43309.85405 | 33024.05155 | 26250.74573 |   |
| 27557.39697   |               |             |             |             |   |
| DMXL2         | DMXL2         | 171.8769011 | 235.9300993 | 249.7734705 |   |
| 245.1900222   |               |             |             |             |   |
| TNFSF12       | TNFSF12       | 868.7596094 | 547.5691111 | 604.3625939 |   |
| 458.9957215   |               |             |             |             |   |
| FBX03-AS1     | FBX03-AS1     | 0           | 0.880336191 | 0           | 0 |
| LHX4-AS1      | LHX4-AS1      | 32.29202385 | 44.01680957 |             |   |
| 14.49578177   |               |             |             |             |   |
| SLX1B-SULT1A4 | SLX1B-SULT1A4 | 75.00082959 | 95.95664487 |             |   |
| 113.7361339   |               |             |             |             |   |
| GMPS          | GMPS          | 10206.36289 | 9171.342442 | 7913.581787 |   |
| 9195.606591   |               |             |             |             |   |
| CAMKK1        | CAMKK1        | 119.7929917 | 55.46118006 | 201.8258847 |   |
| 241.2669818   |               |             |             |             |   |
| NTAN1         | NTAN1         | 3009.408287 | 3033.638516 | 1920.133555 |   |
| 2547.03395    |               |             |             |             |   |
| PLXND1        | PLXND1        | 20.83356377 | 116.2043773 | 57.98312709 |   |
| 142.2102129   |               |             |             |             |   |
| ZNF644        | ZNF644        | 3187.535257 | 3398.097699 | 4213.812255 |   |
| 3488.563635   |               |             |             |             |   |
| PELI3         | PELI3         | 344.7954805 | 260.5795127 | 549.7246472 |   |
| 570.8023716   |               |             |             |             |   |
| HSF2          | HSF2          | 1591.684272 | 1638.305652 | 1980.346802 |   |
| 2059.596186   |               |             |             |             |   |
| PARN          | PARN          | 6978.202186 | 6063.755687 | 5948.845827 |   |
| 6850.609219   |               |             |             |             |   |
| SULT1A3       | SULT1A3       | 12.50013826 | 26.41008574 | 14.49578177 |   |
| 13.73064124   |               |             |             |             |   |
| TSSK2         | TSSK2         | 36.4587366  | 39.61512861 | 26.76144327 |   |
| 19.61520177   |               |             |             |             |   |
| KIAA1377      | KIAA1377      | 90.62600242 | 99.47798963 |             |   |
| 122.656615    |               |             |             |             |   |
| ORAI1         | ORAI1         | 5568.811597 | 4311.886666 | 4949.751945 |   |
| 4834.166477   |               |             |             |             |   |
| PPP1R9B       | PPP1R9B       | 51.04223125 | 328.3653994 | 83.62951022 |   |
| 69.6339663    |               |             |             |             |   |
| LBR           | LBR           | 35753.52047 | 35842.0077  | 20267.33304 |   |
| 22723.23049   |               |             |             |             |   |
| INHBE         | INHBE         | 6.250069132 | 1.760672383 | 4.460240545 |   |
| 9.807600887   |               |             |             |             |   |
| AGAP3         | AGAP3         | 504.1722433 | 620.637015  | 566.4505492 |   |
| 764.9928692   |               |             |             |             |   |
| LOC100996351  | LOC100996351  | 725.0080193 | 1075.770826 |             |   |
| 230.8174482   |               |             |             |             |   |
| DNAJC25       | DNAJC25       | 463.546794  | 249.1351422 | 529.6535647 |   |
| 399.1693561   |               |             |             |             |   |
| ASTE1         | ASTE1         | 1376.056887 | 1201.658901 | 1966.96608  |   |
| 1420.140608   |               |             |             |             |   |

|             |             |             |             |             |
|-------------|-------------|-------------|-------------|-------------|
| NOB1        | NOB1        | 3722.957846 | 3060.928938 | 3413.199077 |
| 3400.295227 |             |             |             |             |
| MAP3K5      | MAP3K5      | 4286.505746 | 4086.520601 | 2639.347343 |
| 3204.14321  |             |             |             |             |
| APOBEC3C    | APOBEC3C    |             | 19655.42574 | 14470.96631 |
| 10034.42617 | 11063.95456 |             |             |             |
| PCM1        | PCM1        | 4861.512107 | 6574.350678 | 6036.935578 |
| 6387.690457 |             |             |             |             |
| GRAMD1C     | GRAMD1C     | 10.41678189 | 102.9993344 | 53.52288654 |
| 62.76864567 |             |             |             |             |
| STARD9      | STARD9      | 89.58432423 | 138.2127821 | 144.9578177 |
| 135.3448922 |             |             |             |             |
| GPA33       | GPA33       | 129.1680954 | 156.6998421 | 249.7734705 |
| 115.7296905 |             |             |             |             |
| GINS1       | GINS1       | 2994.824793 | 4247.622124 | 2292.56364  |
| 2929.530385 |             |             |             |             |
| HIST1H2AD   | HIST1H2AD   |             | 416.6712755 | 2731.683202 |
| 297.7210564 | 472.7263627 |             |             |             |
| HIST1H2AG   | HIST1H2AG   |             | 138.5431991 | 188.391945  |
| 91.43493117 | 57.86484523 |             |             |             |
| NSUN6       | NSUN6       | 989.5942793 | 859.2081228 | 702.4878858 |
| 864.0496381 |             |             |             |             |
| MR1         | MR1         | 3586.498004 | 2487.830077 | 3437.7304   |
| 2693.167203 |             |             |             |             |
| CHRNA6      | CHRNA6      | 1087.512029 | 746.5250903 | 673.4963223 |
| 521.7643672 |             |             |             |             |
| PRMT2       | PRMT2       | 6467.779874 | 5247.684037 | 8129.903454 |
| 6782.936773 |             |             |             |             |
| AAMP        | AAMP        | 6888.617862 | 6251.267295 | 7080.631865 |
| 6611.303758 |             |             |             |             |
| MEGF10      | MEGF10      | 0           | 4.401680957 | 0           |
| STX10       | STX10       | 2531.277999 | 2836.443209 | 1709.387189 |
| 2415.612098 |             |             |             |             |
| HERC3       | HERC3       | 2175.024058 | 1761.552719 | 2977.210564 |
| 2202.787159 |             |             |             |             |
| RECQL5      | RECQL5      | 1255.222217 | 1519.460266 | 2017.143787 |
| 1750.656758 |             |             |             |             |
| C9orf135    | C9orf135    |             | 20.83356377 | 1.760672383 |
| 26.76144327 | 4.903800443 |             |             |             |
| ANK2        | ANK2        | 4.166712755 | 15.84605145 | 3.345180409 |
| 12.74988115 |             |             |             |             |
| ZNF16       | ZNF16       | 496.880496  | 337.1687613 | 836.2951022 |
| 637.4940576 |             |             |             |             |
| PRSS3       | PRSS3       | 0           | 2.641008574 | 0           |
| SOX5        | SOX5        | 0           | 29.93143051 | 0           |
| EMILIN1     | EMILIN1     | 85.41761147 | 95.95664487 | 93.66505145 |
| 145.1524931 |             |             |             |             |
| SOX12       | SOX12       | 8.33342551  | 74.82857627 | 61.32830749 |
| 49.03800443 |             |             |             |             |
| LIN37       | LIN37       | 672.9241099 | 574.859533  | 936.6505145 |

|             |          |                 |             |               |
|-------------|----------|-----------------|-------------|---------------|
| 766.9543893 |          |                 |             |               |
| TULP4       | TULP4    | 1606.267767     | 1753.629693 | 1487.490222   |
| 1296.564837 |          |                 |             |               |
| SNRPA       | SNRPA    | 5901.106939     | 5884.167104 | 3785.629163   |
| 5353.969324 |          |                 |             |               |
| SMS         | SMS      | 9103.225691     | 5485.374809 | 6904.452364   |
| 8068.713249 |          |                 |             |               |
| FSTL1       | FSTL1    | 11.45846008     | 3.521344766 | 0 10.78836098 |
| TRIO        | TRIO     | 45.8338403      | 99.47798963 | 25.64638313   |
| 31.38432284 |          |                 |             |               |
| DSG2        | DSG2     | 75.00082959     | 400.5529671 | 7.805420954   |
| 157.9023743 |          |                 |             |               |
| PPP1R3D     | PPP1R3D  | 256.2528344     | 379.4248985 | 578.7162107   |
| 341.3045109 |          |                 |             |               |
| PPEF2       | PPEF2    | 0 0             | 6.690360818 | 2.942280266   |
| RAC1        | RAC1     | 11290.74989     | 10402.05244 | 9211.511786   |
| 9422.162172 |          |                 |             |               |
| CCDC176     | CCDC176  | 405.2128154     | 393.5102776 | 459.4047761   |
| 465.8610421 |          |                 |             |               |
| PRR11       | PRR11    | 2591.695333     | 4543.415084 | 1362.603487   |
| 2117.461031 |          |                 |             |               |
| RPS23       | RPS23    | 14500.16039     | 17783.6714  | 17974.7694    |
| 17521.27898 |          |                 |             |               |
| NOSIP       | NOSIP    | 6363.612055     | 5639.433642 | 4518.223672   |
| 4710.590706 |          |                 |             |               |
| TULP3       | TULP3    | 785.4253543     | 565.1758349 | 593.2119925   |
| 714.9741046 |          |                 |             |               |
| ZNF646      | ZNF646   | 323.9619167     | 1143.556713 | 1016.934844   |
| 670.8399006 |          |                 |             |               |
| H2AFZ       | H2AFZ    | 49606.7987      | 53180.22899 | 31918.5964    |
| 39876.72445 |          |                 |             |               |
| MCM8        | MCM8     | 391.670999      | 565.1758349 | 363.5096044   |
| 322.6700692 |          |                 |             |               |
| FMNL3       | FMNL3    | 1176.054675     | 2074.072067 | 1389.36493    |
| 1867.367209 |          |                 |             |               |
| SDC3        | SDC3     | 0 9.683698106 0 |             | 2.942280266   |
| ARPC4       | ARPC4    | 17580.40279     | 16005.3923  | 10488.25564   |
| 11635.73769 |          |                 |             |               |
| BRMS1       | BRMS1    | 5419.851616     | 3890.20563  | 4396.682117   |
| 3985.809    |          |                 |             |               |
| MB21D2      | MB21D2   | 907.3017024     | 572.2185244 | 752.665592    |
| 458.9957215 |          |                 |             |               |
| GPR108      | GPR108   | 5733.396751     | 4174.55422  | 4784.723045   |
| 4884.185242 |          |                 |             |               |
| COL21A1     | COL21A1  | 0 0             | 1.115060136 | 0             |
| TTC5        | TTC5     | 2817.7395       | 1846.94533  | 1746.184173   |
| 2234.171482 |          |                 |             |               |
| ZG16        | ZG16     | 2.083356377     | 0 0         | 0             |
| C19orf25    | C19orf25 |                 | 1507.308339 | 1389.17051    |
| 1539.898048 |          | 1321.083839     |             |               |

|             |             |             |             |
|-------------|-------------|-------------|-------------|
| C16orf54    | C16orf54    | 1877.104096 | 1149.719066 |
| 2690.640109 | 468.8033224 |             |             |
| TBC1D8B     | TBC1D8B     | 17.70852921 | 41.375801   |
| 41.19192372 |             |             | 91.43493117 |
| LRRC57      | LRRC57      | 1530.225259 | 1380.367148 |
| 1328.92992  |             |             | 1226.56615  |
| GTF2E2      | GTF2E2      | 4806.303163 | 3371.687613 |
| 3413.045109 |             |             | 3484.562926 |
| SSSCA1      | SSSCA1      | 2686.488049 | 2267.746029 |
| 2341.074332 |             |             | 2300.369061 |
| PSMD10      | PSMD10      | 3954.210404 | 3208.825418 |
| 4189.807099 |             |             | 4657.606189 |
| PSMD3       | PSMD3       | 7876.128785 | 10093.05443 |
| 6628.957439 |             |             | 6364.763258 |
| DMWD        | DMWD        | 693.7576737 | 993.8995601 |
| 717.9163849 |             |             | 680.1866831 |
| ZNF84       | ZNF84       | 19.79188559 | 11.44437049 |
| 17.6536816  |             |             | 24.531323   |
| ABCA7       | ABCA7       | 395.8377117 | 1185.81285  |
| 659.0707796 |             |             | 425.9529721 |
| ASCC2       | ASCC2       | 7903.212418 | 5266.171097 |
| 5811.003525 |             |             | 6204.194598 |
| RSAD2       | RSAD2       | 4388.590209 | 397.0316223 |
| 2799.089293 |             |             | 26296.46319 |
| ABI3BP      | ABI3BP      | 11.45846008 | 10.5640343  |
| 13.73064124 |             |             | 36.7969845  |
| ZNF324B     | ZNF324B     | 62.50069132 | 140.8537906 |
| 94.15296851 |             |             | 121.5415549 |
| ZNF662      | ZNF662      | 10.41678189 | 1.760672383 |
| 18.63444168 |             |             | 45.71746559 |
| CPSF4L      | CPSF4L      | 176.0436139 | 113.5633687 |
| 88.26840798 |             |             | 119.3114346 |
| WDR47       | WDR47       | 1982.313593 | 1487.768164 |
| 1297.545597 |             |             | 2289.21846  |
| NME2        | NME2        | 14932.45684 | 13119.65026 |
| 12588.05574 |             |             | 12082.79164 |
| CCDC58      | CCDC58      | 1298.972701 | 382.0659071 |
| 332.4776701 |             |             | 1213.185428 |
| IGBP1       | IGBP1       | 1727.102437 | 1997.482818 |
| 1631.004027 |             |             | 2050.595591 |
| OTP         | OTP         | 0           | 0           |
| 4.460240545 |             |             | 0           |
| TRMT13      | TRMT13      | 1122.929087 | 995.6602325 |
| 1168.085266 |             |             | 1122.865557 |
| PLL         | PLL         | 1.041678189 | 7.042689532 |
| 20.59596186 |             |             | 36.7969845  |
| ZNF589      | ZNF589      | 1208.346699 | 996.5405687 |
| 1495.659135 |             |             | 1121.750497 |
| EHMT1       | EHMT1       | 3318.786709 | 3782.804615 |
| 3605.274086 |             |             | 3214.718373 |
| UTP20       | UTP20       | 2350.025994 | 2456.137974 |
|             |             |             | 2681.719628 |

|              |              |             |             |             |             |
|--------------|--------------|-------------|-------------|-------------|-------------|
| 2565.668392  |              |             |             |             |             |
| AMER2        | AMER2        | 2.083356377 | 0           | 21.18614259 | 1.961520177 |
| CTHRC1       | CTHRC1       | 284.3781455 | 306.3569946 | 26.76144327 |             |
| 94.15296851  |              |             |             |             |             |
| C11orf63     | C11orf63     |             | 175.0019357 | 61.6235334  |             |
| 409.22707    |              | 217.7287397 |             |             |             |
| MUSTN1       | MUSTN1       | 59.37565676 | 36.09378385 | 31.22168382 |             |
| 45.11496408  |              |             |             |             |             |
| GMPPA        | GMPPA        | 3573.997865 | 2806.511778 | 2711.826251 |             |
| 2580.379793  |              |             |             |             |             |
| PHLPP1       | PHLPP1       | 269.7946509 | 259.6991765 | 172.8343211 |             |
| 195.1712576  |              |             |             |             |             |
| COQ10A       | COQ10A       | 390.6293208 | 303.715986  | 363.5096044 |             |
| 376.611874   |              |             |             |             |             |
| CTRB2        | CTRB2        | 0           | 0           | 12.2656615  | 0           |
| HLA-DQB2     | HLA-DQB2     |             | 1.041678189 | 0.880336191 |             |
| 4.460240545  |              | 0.980760089 |             |             |             |
| GTF2H2C_2    | GTF2H2C_2    |             | 1352.098289 | 825.7553476 |             |
| 1266.708315  |              | 1119.047261 |             |             |             |
| PI4KAP2      | PI4KAP2      | 211.4606723 | 292.2716156 | 357.9343037 |             |
| 323.6508293  |              |             |             |             |             |
| SRRD         | SRRD         | 2635.445817 | 2012.448534 | 2371.73291  |             |
| 2334.209011  |              |             |             |             |             |
| SPRR2A       | SPRR2A       | 0           | 0           | 0.980760089 |             |
| EIF3D        | EIF3D        | 16937.68735 | 10723.37515 | 15634.25817 |             |
| 14096.46475  |              |             |             |             |             |
| CAT          | CAT          | 5629.228932 | 3395.45669  | 3320.649086 |             |
| 2766.72421   |              |             |             |             |             |
| CHCHD10      | CHCHD10      | 176.0436139 | 593.346593  | 217.4367266 |             |
| 237.3439415  |              |             |             |             |             |
| DHX35        | DHX35        | 1259.38893  | 939.3187163 | 1270.053495 |             |
| 1018.028972  |              |             |             |             |             |
| MIR4435-2    | MIR4435-2    |             | 8.33342551  | 5.282017149 | 0           |
| 0.980760089  |              |             |             |             |             |
| LOC100128233 | LOC100128233 |             | 3.125034566 | 0.880336191 | 0           |
| 0            |              |             |             |             |             |
| EMBP1        | EMBP1        | 196.8771777 | 173.4262297 | 211.8614259 |             |
| 128.4795716  |              |             |             |             |             |
| GIPC3        | GIPC3        | 5.208390943 | 44.89714576 | 41.25722504 |             |
| 21.57672195  |              |             |             |             |             |
| SNORA30      | SNORA30      | 3.125034566 | 1.760672383 | 2.230120273 |             |
| 3.923040355  |              |             |             |             |             |
| ANGPTL1      | ANGPTL1      | 2.083356377 | 3.521344766 | 0           | 0           |
| SNHG7        | SNHG7        | 291.6698928 | 220.0840479 | 398.0764686 |             |
| 270.6897845  |              |             |             |             |             |
| CCL27        | CCL27        | 3.125034566 | 6.16235334  | 7.805420954 |             |
| 1.961520177  |              |             |             |             |             |
| CFAP20       | CFAP20       | 5064.639353 | 3929.820759 | 4154.714068 |             |
| 3982.86672   |              |             |             |             |             |
| WDTC1        | WDTC1        | 130.2097736 | 667.2948331 | 334.5180409 |             |



|             |          |             |   |             |             |
|-------------|----------|-------------|---|-------------|-------------|
| 275.5935849 |          |             |   |             |             |
| CLEC4G      | CLEC4G   | 0           | 0 | 1.115060136 | 0.980760089 |
| TBC1D13     | TBC1D13  | 2657.321059 |   | 2106.644506 | 2533.41663  |
| 2986.41447  |          |             |   |             |             |
| PRPF39      | PRPF39   | 2191.690909 |   | 1819.654908 | 1948.010058 |
| 2193.960318 |          |             |   |             |             |
| RHEB        | RHEB     | 4950.054753 |   | 3862.915208 | 5109.205544 |
| 4031.904725 |          |             |   |             |             |
| UBE20       | UBE20    | 2113.565045 |   | 2313.523511 | 2488.814224 |
| 2270.459605 |          |             |   |             |             |
| NUCKS1      | NUCKS1   | 1128.137478 |   | 3774.881589 | 1450.693237 |
| 1726.137756 |          |             |   |             |             |
| INF2        | INF2     | 1105.220558 |   | 971.0108192 | 472.7854978 |
| 460.9572417 |          |             |   |             |             |
| ETV3L       | ETV3L    | 2.083356377 |   | 0.880336191 | 0           |
| RBP1        | RBP1     | 2.083356377 |   | 4.401680957 | 0           |
| CARNS1      | CARNS1   | 16.66685102 |   | 42.25613719 | 51.29276627 |
| 49.03800443 |          |             |   |             |             |
| SNX3        | SNX3     | 8532.386044 |   | 6204.609477 | 8374.101623 |
| 7353.739145 |          |             |   |             |             |
| GMPPB       | GMPPB    | 5461.518743 |   | 4041.623455 | 3655.167127 |
| 3728.849857 |          |             |   |             |             |
| HEATR6      | HEATR6   | 1500.016592 |   | 1403.255889 | 1257.787834 |
| 1693.772673 |          |             |   |             |             |
| CDC26       | CDC26    | 1585.434203 |   | 1404.136225 | 1538.782988 |
| 1723.195476 |          |             |   |             |             |
| C15orf43    | C15orf43 |             |   | 3.125034566 | 0           |
| 0.980760089 |          |             |   |             | 0           |
| FAM161B     | FAM161B  | 335.4203768 |   | 272.0238832 | 428.1830923 |
| 393.2847956 |          |             |   |             |             |
| HCG27       | HCG27    | 12.50013826 |   | 6.16235334  | 34.56686422 |
| 1.961520177 |          |             |   |             |             |
| PUM2        | PUM2     | 3397.954252 |   | 4653.457108 | 3810.160486 |
| 3796.522303 |          |             |   |             |             |
| SPRED1      | SPRED1   | 8.33342551  |   | 26.41008574 | 76.9391494  |
| 34.3266031  |          |             |   |             |             |
| SYNE3       | SYNE3    | 853.1344365 |   | 957.8057763 | 379.1204463 |
| 494.3030847 |          |             |   |             |             |
| PPID        | PPID     | 5751.10528  |   | 4266.98952  | 5603.177185 |
| 5803.157445 |          |             |   |             |             |
| TBX19       | TBX19    | 67.70908227 |   | 83.63193819 | 170.6042008 |
| 144.171733  |          |             |   |             |             |
| C22orf24    | C22orf24 |             |   | 46.87551849 | 22.00840479 |
| 45.71746559 |          |             |   |             |             |
| CYP2S1      | CYP2S1   | 22.91692015 |   | 5.282017149 | 0           |
| HVCN1       | HVCN1    | 450.0049775 |   | 535.2444044 | 342.3234618 |
| 407.9961969 |          |             |   |             |             |
| HACE1       | HACE1    | 1709.393908 |   | 1388.290174 | 1084.953513 |
| 1253.411393 |          |             |   |             |             |
| SDR39U1     | SDR39U1  | 1994.813731 |   | 2567.94067  | 3094.291878 |

|             |             |             |             |             |             |
|-------------|-------------|-------------|-------------|-------------|-------------|
| 3486.602115 |             |             |             |             |             |
| MFF         | MFF         | 5010.472088 | 5158.770082 | 4666.52667  |             |
| 4586.034175 |             |             |             |             |             |
| GAPDHS      | GAPDHS      | 84.37593328 | 141.7341268 | 94.78011158 |             |
| 188.305937  |             |             |             |             |             |
| FAM117B     | FAM117B     | 235.4192706 | 381.1855709 | 1677.050445 |             |
| 1034.701894 |             |             |             |             |             |
| UBL3        | UBL3        | 947.9271517 | 1618.05792  | 1915.673314 |             |
| 1373.064124 |             |             |             |             |             |
| HHIP        | HHIP        | 0           | 2.641008574 | 12.2656615  | 0.980760089 |
| DUOX1       | DUOX1       | 41.66712755 | 95.95664487 | 86.97469063 |             |
| 101.0182891 |             |             |             |             |             |
| ZNF440      | ZNF440      | 468.7551849 | 456.0141472 | 443.7939342 |             |
| 496.2646049 |             |             |             |             |             |
| CEP89       | CEP89       | 626.0485914 | 507.0736463 | 460.5198363 |             |
| 512.9375264 |             |             |             |             |             |
| RRP9        | RRP9        | 4383.381818 | 2500.154784 | 3943.967702 |             |
| 3605.274086 |             |             |             |             |             |
| CAMK1       | CAMK1       | 1607.309445 | 2382.189734 | 985.7131605 |             |
| 2929.530385 |             |             |             |             |             |
| APOL2       | APOL2       | 6100.067473 | 4743.251399 | 8610.494372 |             |
| 6118.962193 |             |             |             |             |             |
| FAM156B     | FAM156B     | 137.5015209 | 138.2127821 | 97.01023186 |             |
| 139.2679326 |             |             |             |             |             |
| ANKRD12     | ANKRD12     | 3454.204874 | 2979.938008 | 9262.804552 |             |
| 6329.825612 |             |             |             |             |             |
| SPATA13     | SPATA13     | 6413.612608 | 6042.627618 | 11001.1833  |             |
| 7688.178335 |             |             |             |             |             |
| GRIP1       | GRIP1       | 9.375103698 | 33.45277527 | 41.25722504 |             |
| 85.32612771 |             |             |             |             |             |
| MIR548I2    | MIR548I2    | 0           | 0.880336191 | 0           |             |
| 1.961520177 |             |             |             |             |             |
| VAPA        | VAPA        | 16935.60399 | 12907.48924 | 12105.09284 |             |
| 12433.09564 |             |             |             |             |             |
| GSKIP       | GSKIP       | 4501.091453 | 3454.439215 | 3893.789996 |             |
| 3796.522303 |             |             |             |             |             |
| CACNA1I     | CACNA1I     | 18.7502074  | 36.09378385 | 83.62951022 |             |
| 68.65320621 |             |             |             |             |             |
| NTRK1       | NTRK1       | 170.8352229 | 177.8279107 | 479.4758586 |             |
| 1217.12327  |             |             |             |             |             |
| ZNF600      | ZNF600      | 894.8015641 | 551.0904558 | 1667.014904 |             |
| 1252.430633 |             |             |             |             |             |
| ADAM20P1    | ADAM20P1    | 0           | 2.083356377 | 3.521344766 | 0           |
| 0           |             |             |             |             |             |
| LOC642852   | LOC642852   | 61.45901313 | 117.9650497 |             |             |
| 93.66505145 | 143.1909729 |             |             |             |             |
| CASC2       | CASC2       | 5.208390943 | 5.282017149 | 33.45180409 |             |
| 17.6536816  |             |             |             |             |             |
| SPESP1      | SPESP1      | 17.70852921 | 77.46958485 | 64.6734879  |             |
| 80.42232727 |             |             |             |             |             |

|              |              |             |             |             |             |
|--------------|--------------|-------------|-------------|-------------|-------------|
| GSX1         | GSX1         | 0           | 0           | 0           | 1.961520177 |
| RBM17        | RBM17        | 13343.8976  |             | 10100.97746 | 8811.205197 |
| 8492.401608  |              |             |             |             |             |
| PSMG4        | PSMG4        | 852.0927584 |             | 819.5929942 | 943.3408753 |
| 849.3382368  |              |             |             |             |             |
| HIGD1C       | HIGD1C       | 0           | 0.880336191 | 0           | 0.980760089 |
| SPINK9       | SPINK9       | 2.083356377 |             | 0.880336191 | 2.230120273 |
| 0.980760089  |              |             |             |             |             |
| LINC00641    | LINC00641    |             |             | 33.33370204 | 67.78588674 |
| 88.08975076  | 73.55700665  |             |             |             |             |
| KCNQ10T1     | KCNQ10T1     |             |             | 140.6265555 | 250.0154784 |
| 274.3047935  | 294.2280266  |             |             |             |             |
| C4orf29      | C4orf29      | 1178.138031 |             | 1066.967464 | 1090.528813 |
| 1110.22042   |              |             |             |             |             |
| S100A13      | S100A13      | 310.4201002 |             | 283.4682536 | 250.8885307 |
| 324.6315893  |              |             |             |             |             |
| C7orf55      | C7orf55      | 954.1772208 |             | 810.7896323 | 659.0005405 |
| 686.5320621  |              |             |             |             |             |
| PTPN12       | PTPN12       | 98.95942793 |             | 232.4087545 | 110.3909535 |
| 72.57624656  |              |             |             |             |             |
| ARL17B       | ARL17B       | 112.5012444 |             | 77.46958485 | 103.7005927 |
| 101.0182891  |              |             |             |             |             |
| ZNF843       | ZNF843       | 1.041678189 |             | 3.521344766 | 5.575300681 |
| 5.884560532  |              |             |             |             |             |
| POR          | POR          | 3485.455219 |             | 2874.297665 | 3801.240005 |
| 3379.699266  |              |             |             |             |             |
| C2CD4C       | C2CD4C       | 2.083356377 |             | 0           | 0.980760089 |
| LMTK3        | LMTK3        | 1.041678189 |             | 6.16235334  | 4.460240545 |
| 2.942280266  |              |             |             |             |             |
| FAM21EP      | FAM21EP      | 16.66685102 |             | 14.08537906 | 13.38072164 |
| 27.46128248  |              |             |             |             |             |
| LOC100505736 | LOC100505736 |             |             | 12.50013826 | 14.96571525 |
| 32.33674395  | 8.826840798  |             |             |             |             |
| CAGE1        | CAGE1        | 18.7502074  |             | 8.803361914 | 22.30120273 |
| 15.69216142  |              |             |             |             |             |
| NAA35        | NAA35        | 2677.112945 |             | 2405.958811 | 2743.047935 |
| 2251.825164  |              |             |             |             |             |
| ACSM2A       | ACSM2A       | 0           | 5.282017149 | 0           | 0           |
| USP22        | USP22        | 3431.287954 |             | 6841.97288  | 5077.983861 |
| 2812.819934  |              |             |             |             |             |
| SERP1        | SERP1        | 14439.74305 |             | 10880.07499 | 15615.30215 |
| 12622.38234  |              |             |             |             |             |
| LEAP2        | LEAP2        | 88.54264604 |             | 117.9650497 | 107.0457731 |
| 72.57624656  |              |             |             |             |             |
| SH3RF2       | SH3RF2       | 16.66685102 |             | 117.0847135 | 0           |
| AHI1         | AHI1         | 1742.72761  |             | 1428.785639 | 18.63444168 |
| 1026.855813  |              |             |             |             | 955.6065368 |
| GHDC         | GHDC         | 485.4220359 |             | 880.3361914 | 763.8161933 |
| 760.0890687  |              |             |             |             |             |
| SQLE         | SQLE         | 2770.863982 |             | 3584.728972 | 2137.570281 |

|                 |             |             |             |             |             |
|-----------------|-------------|-------------|-------------|-------------|-------------|
| 3335.565062     |             |             |             |             |             |
| C20orf96        | C20orf96    | 54.16726581 | 155.8195059 |             |             |
| 42.37228518     | 69.6339663  |             |             |             |             |
| PCBP1 PCBP1     | 6471.946586 | 11844.92346 | 7687.224579 |             |             |
| 7029.107555     |             |             |             |             |             |
| TOMM20 TOMM20   | 3575.039544 | 3553.917205 | 4663.18149  |             |             |
| 3652.35057      |             |             |             |             |             |
| CHRNA1 CHRNA1   | 531.2558762 | 385.5872518 | 809.5336589 |             |             |
| 580.6099725     |             |             |             |             |             |
| SNAP23 SNAP23   | 7857.378577 | 7518.071075 | 5536.273577 |             |             |
| 6785.879053     |             |             |             |             |             |
| ZP1 ZP1         | 2.083356377 | 0.880336191 | 7.805420954 |             |             |
| 0.980760089     |             |             |             |             |             |
| TMEM150B        | TMEM150B    | 9.375103698 | 4.401680957 |             |             |
| 2.230120273     | 0           |             |             |             |             |
| JAKMIP2-AS1     | JAKMIP2-AS1 | 23.95859834 | 51.0594991  |             |             |
| 6.690360818     | 39.23040355 |             |             |             |             |
| RFPL3S RFPL3S   | 7.291747321 | 5.282017149 | 31.22168382 |             |             |
| 5.884560532     |             |             |             |             |             |
| C21orf67        | C21orf67    | 269.7946509 | 235.9300993 |             |             |
| 241.9680496     | 274.6128248 |             |             |             |             |
| DUXAP10 DUXAP10 | 23.95859834 | 0           | 25.64638313 | 2.942280266 |             |
| SNORA11B        | SNORA11B    | 3.125034566 | 6.16235334  |             |             |
| 17.84096218     | 5.884560532 |             |             |             |             |
| SNORD11B        | SNORD11B    | 13.54181645 | 6.16235334  | 0           |             |
|                 | 4.903800443 |             |             |             |             |
| SUSD4 SUSD4     | 35.41705842 | 15.84605145 | 61.32830749 |             |             |
| 94.15296851     |             |             |             |             |             |
| KLF16 KLF16     | 52.08390943 | 262.340185  | 74.70902913 |             |             |
| 83.36460754     |             |             |             |             |             |
| NFAT5 NFAT5     | 2198.982656 | 2211.404513 | 3082.026217 |             |             |
| 2324.40141      |             |             |             |             |             |
| REEP1 REEP1     | 9.375103698 | 3.521344766 | 13.38072164 |             |             |
| 2.942280266     |             |             |             |             |             |
| EPB41L5 EPB41L5 | 557.297831  | 372.382209  | 543.0342864 |             |             |
| 410.9384772     |             |             |             |             |             |
| STX1A STX1A     | 162.5017974 | 158.4605145 | 136.0373366 |             |             |
| 179.4790962     |             |             |             |             |             |
| WASF2 WASF2     | 2126.065183 | 5006.471921 | 2995.051526 |             |             |
| 2773.589531     |             |             |             |             |             |
| PYCARD PYCARD   | 1915.646189 | 2026.533913 | 472.7854978 |             |             |
| 801.2809924     |             |             |             |             |             |
| SLC2A12 SLC2A12 | 62.50069132 | 37.85445623 | 76.9391494  |             |             |
| 39.23040355     |             |             |             |             |             |
| PIGM PIGM       | 727.0913757 | 703.388617  | 1120.635437 |             |             |
| 971.9332479     |             |             |             |             |             |
| SNORD111B       | SNORD111B   | 0           | 0           | 0           | 0.980760089 |
| POU6F1 POU6F1   | 37.50041479 | 42.25613719 | 218.5517867 |             |             |
| 144.171733      |             |             |             |             |             |
| MIR99AHG        | MIR99AHG    | 0           | 9.683698106 | 1.115060136 |             |

|              |              |             |   |             |
|--------------|--------------|-------------|---|-------------|
|              | 0.980760089  |             |   |             |
| MIR3609      | MIR3609      | 0           | 0 | 2.230120273 |
| SDHAP1       | SDHAP1       | 1086.470351 |   | 1428.785639 |
|              |              | 1516.255097 |   |             |
| PP12613      | PP12613      | 1.041678189 |   | 3.521344766 |
| FAM86B3P     | FAM86B3P     |             |   | 10.41678189 |
|              |              | 49.062646   |   |             |
| LINC01000    | LINC01000    |             |   | 206.2522814 |
|              |              | 344.5535821 |   |             |
| LOC100288842 | LOC100288842 |             |   | 96.87607155 |
|              |              | 102.5855325 |   |             |
| RNF19A       | RNF19A       | 5595.89523  |   | 6416.770499 |
|              |              | 9545.737943 |   |             |
| MGC57346     | MGC57346     |             |   | 425.004701  |
|              |              | 440.4487538 |   |             |
| CISD2        | CISD2        | 4535.466834 |   | 3705.33503  |
|              |              | 3046.240835 |   |             |
| MRI1         | MRI1         | 1471.891281 |   | 1563.477076 |
|              |              | 1455.447972 |   |             |
| SLC9A2       | SLC9A2       | 1.041678189 |   | 2.641008574 |
| PNLIPRP2     | PNLIPRP2     |             |   | 0           |
|              |              | 62.44336763 |   | 0           |
| LOC100507462 | LOC100507462 |             |   | 4.460240545 |
|              |              | 62.44336763 |   | 0           |
| DOPEY1       | DOPEY1       | 486.4637141 |   | 47.53815434 |
|              |              | 522.7451273 |   |             |
| DLEU1        | DLEU1        | 964.5940027 |   | 599.5089464 |
|              |              | 654.1669791 |   | 764.9312535 |
| LOC101927722 | LOC101927722 |             |   | 517.6376806 |
|              |              | 16.67292151 |   | 819.5692002 |
| LINC00320    | LINC00320    |             |   | 0           |
| TBC1D23      | TBC1D23      | 3254.202661 |   | 0           |
|              |              | 2772.608771 |   | 0           |
| OTUB1        | OTUB1        | 11276.16639 |   | 0           |
|              |              | 8188.36598  |   | 0           |
| LINC00998    | LINC00998    |             |   | 0           |
|              |              | 1948.010058 |   | 0           |
| ATG7         | ATG7         | 3057.325484 |   | 0           |
|              |              | 3608.216366 |   | 0           |
| LOC407835    | LOC407835    |             |   | 0           |
|              |              | 2.230120273 |   | 0           |
| OR6W1P       | OR6W1P       | 0           | 0 | 1.961520177 |
| SPAG17       | SPAG17       | 466.6718285 |   | 290.5109432 |
|              |              | 537.4565286 |   | 472.7854978 |
| LITAF        | LITAF        | 11757.42172 |   | 18088.26773 |
|              |              | 14031.73459 |   | 11587.70494 |
| RRBP1        | RRBP1        | 1415.640658 |   | 2105.76417  |
|              |              | 1096.489779 |   | 924.384853  |
| PIGU         | PIGU         | 2165.648954 |   | 2014.209206 |
|              |              | 1934.058895 |   | 1519.826966 |
| LOC100500773 | LOC100500773 |             |   | 0           |
|              |              |             |   | 0           |
|              |              |             |   | 0           |
|              |              |             |   | 1.961520177 |

|              |              |             |             |             |             |
|--------------|--------------|-------------|-------------|-------------|-------------|
| WFDC3        | WFDC3        | 2.083356377 | 3.521344766 | 11.15060136 |             |
| 2.942280266  |              |             |             |             |             |
| COLCA1       | COLCA1       | 0           | 0.880336191 | 1.115060136 | 4.903800443 |
| PSMD1        | PSMD1        | 26954.46481 | 17232.58095 | 18338.279   |             |
| 18011.65903  |              |             |             |             |             |
| GS1-24F4.2   | GS1-24F4.2   |             | 3.125034566 | 3.521344766 | 0           |
| 2.942280266  |              |             |             |             |             |
| LOC100652768 | LOC100652768 |             | 71.87579502 | 95.07630868 |             |
| 89.2048109   | 79.44156718  |             |             |             |             |
| NAPRT        | NAPRT        | 1295.847667 | 2278.310063 | 751.5505318 |             |
| 2037.038704  |              |             |             |             |             |
| PLS3         | PLS3         | 269.7946509 | 905.865941  | 59.09818722 |             |
| 271.6705446  |              |             |             |             |             |
| HSF5         | HSF5         | 422.9213446 | 411.9973376 | 486.1662194 |             |
| 619.840376   |              |             |             |             |             |
| LOC202181    | LOC202181    |             | 256.2528344 | 357.4164937 |             |
| 398.0764686  | 404.0731565  |             |             |             |             |
| GFPT1        | GFPT1        | 5390.684627 | 4455.381465 | 6080.422923 |             |
| 4696.860065  |              |             |             |             |             |
| P2RY11       | P2RY11       | 1453.141073 | 1326.666641 | 1495.295643 |             |
| 1390.717806  |              |             |             |             |             |
| BTG2         | BTG2         | 5889.648479 | 6283.839734 | 9971.982799 |             |
| 14356.36618  |              |             |             |             |             |
| YWHAE        | YWHAE        | 16840.81128 | 16134.80172 | 11955.67478 |             |
| 13577.64267  |              |             |             |             |             |
| SCAI         | SCAI         | 391.670999  | 501.7916291 | 335.633101  |             |
| 328.5546297  |              |             |             |             |             |
| CRB2         | CRB2         | 7.291747321 | 21.12806859 | 21.18614259 |             |
| 16.67292151  |              |             |             |             |             |
| TNKS1BP1     | TNKS1BP1     |             | 163.5434756 | 378.5445623 |             |
| 458.289716   | 381.5156745  |             |             |             |             |
| DTWD2        | DTWD2        | 166.6685102 | 231.5284183 | 284.3403347 |             |
| 219.6902599  |              |             |             |             |             |
| DOK7         | DOK7         | 0           | 0.880336191 | 6.690360818 | 0           |
| INA          | INA          | 70.83411683 | 120.6060582 | 89.2048109  |             |
| 50.99952461  |              |             |             |             |             |
| FTCDNL1      | FTCDNL1      | 41.66712755 | 34.33311147 | 57.98312709 |             |
| 44.13420399  |              |             |             |             |             |
| CRNDE        | CRNDE        | 32.29202385 | 112.6830325 | 52.4078264  |             |
| 55.90332505  |              |             |             |             |             |
| RIC3         | RIC3         | 145.8349464 | 66.02521436 | 246.4282901 |             |
| 204.9788585  |              |             |             |             |             |
| ZNF724P      | ZNF724P      | 82.29257691 | 107.4010154 | 60.21324736 |             |
| 68.65320621  |              |             |             |             |             |
| DFNB59       | DFNB59       | 14.58349464 | 17.60672383 | 35.68192436 |             |
| 37.26888337  |              |             |             |             |             |
| ABHD16B      | ABHD16B      | 96.87607155 | 185.7509364 | 65.78854804 |             |
| 130.4410918  |              |             |             |             |             |
| ORC2         | ORC2         | 2244.816497 | 2317.044856 | 2042.79017  |             |
| 2102.74963   |              |             |             |             |             |

|                 |                 |             |             |             |             |
|-----------------|-----------------|-------------|-------------|-------------|-------------|
| PIAS1           | PIAS1           | 5540.686286 | 4613.841979 | 6036.935578 |             |
| 5301.008279     |                 |             |             |             |             |
| MRT04           | MRT04           | 6892.784575 | 4605.038617 | 6130.600629 |             |
| 6725.071928     |                 |             |             |             |             |
| H3F3B           | H3F3B           | 95979.18663 | 80339.48083 | 84368.79509 |             |
| 77930.21589     |                 |             |             |             |             |
| TRAPPC12        | TRAPPC12        |             | 1258.347252 | 1372.444122 |             |
| 1108.369775     | 1204.373389     |             |             |             |             |
| BNIPL           | BNIPL           | 20.83356377 | 6.16235334  | 5.575300681 |             |
| 23.53824213     |                 |             |             |             |             |
| ATXN1L          | ATXN1L          | 222.9191324 | 738.6020646 | 385.8108071 |             |
| 307.9586678     |                 |             |             |             |             |
| ZNF860          | ZNF860          | 11.45846008 | 9.683698106 | 8.92048109  |             |
| 7.846080709     |                 |             |             |             |             |
| GRWD1           | GRWD1           | 9917.818035 | 5223.034624 | 8468.881735 |             |
| 7363.546746     |                 |             |             |             |             |
| BEX5            | BEX5            | 132.29313   | 54.58084387 | 201.8258847 |             |
| 86.3068878      |                 |             |             |             |             |
| IVD             | IVD             | 3348.995377 | 2788.024718 | 2900.271414 |             |
| 3621.947007     |                 |             |             |             |             |
| NUP210L         | NUP210L         | 8.33342551  | 12.32470668 | 24.531323   |             |
| 14.71140133     |                 |             |             |             |             |
| ALPK2           | ALPK2           | 27.08363291 | 44.01680957 | 113.7361339 |             |
| 84.34536763     |                 |             |             |             |             |
| PPP1R36         | PPP1R36         | 17.70852921 | 4.401680957 | 13.38072164 |             |
| 8.826840798     |                 |             |             |             |             |
| CACNA2D4        | CACNA2D4        |             | 123.9597045 | 222.7250564 |             |
| 183.9849225     | 226.5555805     |             |             |             |             |
| UBE2E1-AS1      | UBE2E1-AS1      |             | 0           | 0.880336191 | 0           |
| 0.980760089     |                 |             |             |             |             |
| TNFSF12-TNFSF13 | TNFSF12-TNFSF13 |             | 826.0508036 | 440.1680957 |             |
| 603.2475337     | 430.5536789     |             |             |             |             |
| C6orf226        | C6orf226        |             | 218.7524196 | 312.519348  |             |
| 168.3740806     | 213.8056993     |             |             |             |             |
| LOC102724224    | LOC102724224    |             | 0           | 0.880336191 | 0           |
| PCMTD2          | PCMTD2          | 1577.100778 | 1399.734544 | 2071.781733 |             |
| 1867.367209     |                 |             |             |             |             |
| SLC35B4         | SLC35B4         | 2413.568363 | 1992.200801 | 1718.30767  |             |
| 2179.248917     |                 |             |             |             |             |
| ZNF382          | ZNF382          | 383.3375734 | 406.7153204 | 473.9005579 |             |
| 464.880282      |                 |             |             |             |             |
| PDGFRL          | PDGFRL          | 4.166712755 | 1.760672383 | 44.60240545 |             |
| 8.826840798     |                 |             |             |             |             |
| MIR4663         | MIR4663         | 0           | 1.760672383 | 0           | 0.980760089 |
| MIR4653         | MIR4653         | 0           | 0.880336191 | 0           | 0           |
| MIR4651         | MIR4651         | 1.041678189 | 0           | 1.115060136 | 0           |
| MIR4650-2       | MIR4650-2       |             | 2.083356377 | 0           | 0           |
| NEBL-AS1        | NEBL-AS1        |             | 1.041678189 | 1.760672383 | 0           |
| 0.980760089     |                 |             |             |             |             |
| LOC100287042    | LOC100287042    |             | 2477.110733 | 1596.049515 |             |

|                  |                  |               |               |   |
|------------------|------------------|---------------|---------------|---|
| 1740.608873      | 2104.71115       |               |               |   |
| FAR2P2 FAR2P2    | 1.041678189      | 14.96571525   | 6.690360818   |   |
| 1.961520177      |                  |               |               |   |
| NDUF4P1          | NDUF4P1          | 33.33370204   | 28.17075813   |   |
| 28.99156354      | 15.69216142      |               |               |   |
| LOC339803        | LOC339803        | 473.9635759   | 298.4339689   |   |
| 526.3083843      | 249.1130625      |               |               |   |
| LOC646938        | LOC646938        | 0 0           | 0 0.980760089 |   |
| SLC9A9-AS1       | SLC9A9-AS1       | 3.125034566   | 1.760672383   | 0 |
| 0                |                  |               |               |   |
| TM4SF19-TCTEX1D2 | TM4SF19-TCTEX1D2 |               | 454.1716903   |   |
| 450.73213        | 315.5620186      | 331.49691     |               |   |
| LINC00920        | LINC00920        | 48.95887487   | 132.0504287   |   |
| 34.56686422      | 177.517576       |               |               |   |
| LOC100506100     | LOC100506100     | 703.1327774   | 995.6602325   |   |
| 367.969845       | 502.1491654      |               |               |   |
| RBBP5 RBBP5      | 2901.073756      | 3347.918536   | 3730.991216   |   |
| 3111.951761      |                  |               |               |   |
| YBX3 YBX3        | 3811.500492      | 4198.323297   | 2701.79071    |   |
| 2934.434185      |                  |               |               |   |
| DDO DDO          | 1.041678189      | 0 0           | 0             |   |
| SMUG1 SMUG1      | 1648.976573      | 1310.820589   | 1049.271588   |   |
| 1159.258425      |                  |               |               |   |
| C5orf56 C5orf56  | 695.8410301      | 771.1745037   | 1675.935385   |   |
| 871.8957188      |                  |               |               |   |
| CNOT10 CNOT10    | 4406.298738      | 3082.057006   | 3776.708682   |   |
| 3846.541068      |                  |               |               |   |
| KIAA1549         | KIAA1549         | 35.41705842   | 39.61512861   | 0 |
| 125.5372913      |                  |               |               |   |
| TPCN2 TPCN2      | 1017.71959       | 1095.138222   | 677.9565628   |   |
| 818.934674       |                  |               |               |   |
| CAMK1G CAMK1G    | 3.125034566      | 0 0           | 2.942280266   |   |
| NRIP3 NRIP3      | 77.08418596      | 288.7502708   | 175.0644414   |   |
| 254.016863       |                  |               |               |   |
| ZNF527 ZNF527    | 221.8774542      | 256.1778317   | 390.2710477   |   |
| 377.5926341      |                  |               |               |   |
| SPIRE2 SPIRE2    | 22.91692015      | 23.76907717   | 7.805420954   |   |
| 12.74988115      |                  |               |               |   |
| VIMP VIMP        | 3737.541341      | 2189.396108   | 2863.47443    |   |
| 1948.770296      |                  |               |               |   |
| FBN3 FBN3        | 0 0              | 0 0.980760089 |               |   |
| YRDC YRDC        | 5995.899654      | 3516.943085   | 4995.46941    |   |
| 4669.398782      |                  |               |               |   |
| ZCCHC24 ZCCHC24  | 60.41733494      | 129.4094201   | 160.5686596   |   |
| 108.8643698      |                  |               |               |   |
| FLT3 FLT3        | 0 0              | 17.84096218   | 0             |   |
| BTNL9 BTNL9      | 0 0              | 0 1.961520177 |               |   |
| CLIC6 CLIC6      | 9.375103698      | 10.5640343    | 31.22168382   |   |
| 22.55748204      |                  |               |               |   |
| GLMN GLMN        | 2721.905107      | 1936.739621   | 1706.042008   |   |



|             |           |             |             |             |             |
|-------------|-----------|-------------|-------------|-------------|-------------|
| 1945.828016 |           |             |             |             |             |
| HEXDC       | HEXDC     | 848.9677238 | 959.5664487 | 929.9601536 |             |
| 1022.932772 |           |             |             |             |             |
| FAM196A     | FAM196A   | 0           | 0           | 0           | 0.980760089 |
| EML6        | EML6      | 33.33370204 | 24.64941336 | 28.99156354 |             |
| 34.3266031  |           |             |             |             |             |
| EML1        | EML1      | 1.041678189 | 2.641008574 | 36.7969845  |             |
| 57.86484523 |           |             |             |             |             |
| LINC01299   | LINC01299 |             | 0           | 0.880336191 | 0           |
| 0.980760089 |           |             |             |             |             |
| FAM224B     | FAM224B   | 0           | 0.880336191 | 0           | 1.961520177 |
| SNHG5       | SNHG5     | 616.6734877 | 4931.643344 | 1297.929999 |             |
| 4510.515648 |           |             |             |             |             |
| RRS1        | RRS1      | 1311.47284  | 1181.411169 | 1806.397421 |             |
| 1503.505216 |           |             |             |             |             |
| PHGDH       | PHGDH     | 1647.934895 | 5421.110267 | 1669.245024 |             |
| 2600.975755 |           |             |             |             |             |
| PLK2        | PLK2      | 154.1683719 | 191.0329535 | 536.3439255 |             |
| 197.1327778 |           |             |             |             |             |
| JMJD6       | JMJD6     | 4965.679926 | 3714.138392 | 4728.970038 |             |
| 3752.388099 |           |             |             |             |             |
| ADPRM       | ADPRM     | 711.4662029 | 710.4313065 | 1148.51194  |             |
| 835.6075955 |           |             |             |             |             |
| PHYHIPL     | PHYHIPL   | 2.083356377 | 0           | 0           | 0           |
| EIF5A2      | EIF5A2    | 1268.764034 | 1346.034037 | 900.9685901 |             |
| 680.6475015 |           |             |             |             |             |
| MEGF11      | MEGF11    | 5.208390943 | 11.44437049 | 6.690360818 |             |
| 10.78836098 |           |             |             |             |             |
| ARIH20S     | ARIH20S   | 705.2161337 | 551.0904558 | 653.4252399 |             |
| 571.7831317 |           |             |             |             |             |
| C16orf92    | C16orf92  |             | 0           | 0           | 3.345180409 |
| 2.942280266 |           |             |             |             |             |
| ZNF862      | ZNF862    | 343.7538023 | 537.885413  | 656.7704203 |             |
| 620.8211361 |           |             |             |             |             |
| GEN1        | GEN1      | 1367.723462 | 1726.339271 | 808.4185988 |             |
| 1201.431109 |           |             |             |             |             |
| NANOS1      | NANOS1    | 108.3345316 | 112.6830325 | 91.43493117 |             |
| 115.7296905 |           |             |             |             |             |
| DRD2        | DRD2      | 2.083356377 | 24.64941336 | 0           | 4.903800443 |
| GMIP        | GMIP      | 6865.700942 | 7356.089216 | 4405.602598 |             |
| 6267.056967 |           |             |             |             |             |
| EXOC2       | EXOC2     | 6144.859635 | 6445.821594 | 7867.864321 |             |
| 8571.843175 |           |             |             |             |             |
| BARX1       | BARX1     | 1.041678189 | 0           | 0           | 4.903800443 |
| AK8         | AK8       | 25.00027653 | 21.12806859 | 16.72590204 |             |
| 21.57672195 |           |             |             |             |             |
| THUMPD3     | THUMPD3   | 3003.158218 | 2826.759511 | 2524.496149 |             |
| 2693.167203 |           |             |             |             |             |
| ITGB4       | ITGB4     | 8.33342551  | 37.85445623 | 35.68192436 |             |
| 31.38432284 |           |             |             |             |             |

|             |             |             |             |             |
|-------------|-------------|-------------|-------------|-------------|
| TTC21A      | TTC21A      | 122.9180263 | 142.614463  | 85.85963049 |
| 90.22992816 |             |             |             |             |
| ANKRD44     | ANKRD44     | 7324.039345 | 9466.255067 | 6995.887295 |
| 6901.608744 |             |             |             |             |
| KDELC2      | KDELC2      | 1922.937936 | 2173.550057 | 1982.576922 |
| 1779.098801 |             |             |             |             |
| SLC6A4      | SLC6A4      | 10.41678189 | 5.282017149 | 5.575300681 |
| 6.865320621 |             |             |             |             |
| SEPT7-AS1   | SEPT7-AS1   |             | 7.291747321 | 14.08537906 |
| 18.95602232 | 20.59596186 |             |             |             |
| LINC01187   | LINC01187   |             | 0           | 1.760672383 |
| 0.980760089 |             |             |             | 0           |
| MMP23B      | MMP23B      | 0           | 0           | 2.942280266 |
| PCSK7       | PCSK7       | 5363.600994 | 4705.396943 | 4860.547134 |
| 6413.19022  |             |             |             |             |
| GPX6        | GPX6        | 0           | 0.880336191 | 0           |
| GFI1        | GFI1        | 5295.891911 | 4804.874933 | 5166.073611 |
| 6274.903047 |             |             |             |             |
| MIR6771     | MIR6771     | 3.125034566 | 1.760672383 | 2.230120273 |
| 2.942280266 |             |             |             |             |
| ANPEP       | ANPEP       | 151.0433374 | 38.73479242 | 12.2656615  |
| 8.826840798 |             |             |             |             |
| GART        | GART        | 19498.13234 | 14346.83891 | 16331.17076 |
| 19365.10795 |             |             |             |             |
| ANXA7       | ANXA7       | 22885.66981 | 15858.37615 | 18077.35493 |
| 15973.63956 |             |             |             |             |
| DHX30       | DHX30       | 13434.5236  | 10867.75028 | 10064.53279 |
| 11971.15764 |             |             |             |             |
| PNPLA2      | PNPLA2      | 1140.637617 | 1822.295916 | 1602.341416 |
| 1506.447496 |             |             |             |             |
| C12orf5     | C12orf5     | 4583.38403  | 2120.729885 | 3308.383424 |
| 2547.03395  |             |             |             |             |
| GPR84       | GPR84       | 17.70852921 | 5.282017149 | 80.28432981 |
| 26.48052239 |             |             |             |             |
| PARP11      | PARP11      | 404.1711372 | 543.1674301 | 1563.314311 |
| 665.9361002 |             |             |             |             |
| B9D2        | B9D2        | 580.2147511 | 468.3388538 | 415.9174308 |
| 467.8225623 |             |             |             |             |
| ARHGAP39    | ARHGAP39    |             | 2.083356377 | 0           |
| 5.884560532 |             |             |             | 0           |
| FEZF1       | FEZF1       | 0           | 0           | 0.980760089 |
| XPR1        | XPR1        | 1060.428396 | 2247.498297 | 1849.884766 |
| 1715.349395 |             |             |             |             |
| TMEM63C     | TMEM63C     | 0           | 16.72638764 | 0           |
| ATP10D      | ATP10D      | 483.3386796 | 751.8071075 | 253.1186509 |
| 231.4593809 |             |             |             |             |
| TMEM160     | TMEM160     | 2132.315252 | 2664.777651 | 1180.848684 |
| 1550.5817   |             |             |             |             |
| C1orf109    | C1orf109    |             | 1685.435309 | 1172.607807 |
| 1993.727524 | 1602.561985 |             |             |             |

|              |              |             |             |             |             |
|--------------|--------------|-------------|-------------|-------------|-------------|
| MLLT1        | MLLT1        | 143.75159   | 411.9973376 | 207.4011853 |             |
| 202.0365783  |              |             |             |             |             |
| MTMR1        | MTMR1        | 2255.233279 | 2870.77632  | 1922.363675 |             |
| 2440.131101  |              |             |             |             |             |
| NAPA         | NAPA         | 8955.307388 | 6115.695522 | 10988.91764 |             |
| 6424.959341  |              |             |             |             |             |
| DNAJC16      | DNAJC16      | 1147.929364 | 1297.615546 | 1264.478195 |             |
| 1344.622082  |              |             |             |             |             |
| ZNF880       | ZNF880       | 645.840477  | 331.8867442 | 1210.955308 |             |
| 626.7056967  |              |             |             |             |             |
| PRDM2        | PRDM2        | 2373.984592 | 2815.31514  | 3926.12674  |             |
| 2984.45295   |              |             |             |             |             |
| PDLIM4       | PDLIM4       | 111.4595662 | 102.1189982 | 122.656615  |             |
| 199.094298   |              |             |             |             |             |
| C3orf18      | C3orf18      | 1130.220835 | 388.2282604 | 1294.584818 |             |
| 1098.451299  |              |             |             |             |             |
| ANKRD65      | ANKRD65      | 2.083356377 | 0           | 1.961520177 |             |
| C12orf75     | C12orf75     |             | 17707.48753 | 17484.3571  |             |
| 3639.556285  | 5602.101626  |             |             |             |             |
| CLU          | CLU          | 304.1700311 | 1467.520431 | 94.78011158 |             |
| 428.5921587  |              |             |             |             |             |
| LSM1         | LSM1         | 4211.504917 | 3111.108101 | 3151.159945 |             |
| 2819.685255  |              |             |             |             |             |
| LOC100507472 | LOC100507472 |             | 4.166712755 | 0.880336191 | 0           |
| 1.961520177  |              |             |             |             |             |
| IDH1-AS1     | IDH1-AS1     |             | 18.7502074  | 29.93143051 |             |
| 16.72590204  | 22.55748204  |             |             |             |             |
| LOC374443    | LOC374443    |             | 1564.600639 | 1510.656905 |             |
| 1990.382343  | 2041.942505  |             |             |             |             |
| MATK         | MATK         | 203.1272468 | 161.101523  | 459.4047761 |             |
| 1321.083839  |              |             |             |             |             |
| ACHE         | ACHE         | 1.041678189 | 2.641008574 | 10.03554123 |             |
| 10.78836098  |              |             |             |             |             |
| GNA12        | GNA12        | 3988.585785 | 3383.131984 | 2727.437093 |             |
| 3516.024918  |              |             |             |             |             |
| ARL4C        | ARL4C        | 20112.72247 | 15723.68472 | 7678.304098 |             |
| 7250.759336  |              |             |             |             |             |
| BLOC1S2      | BLOC1S2      | 5951.107492 | 3906.932018 | 5231.862159 |             |
| 3830.848906  |              |             |             |             |             |
| MIR4767      | MIR4767      | 7.291747321 | 7.042689532 | 11.15060136 |             |
| 15.69216142  |              |             |             |             |             |
| MIR4766      | MIR4766      | 2.083356377 | 0.880336191 | 0           | 3.923040355 |
| FAM45B       | FAM45B       | 4089.628569 | 3489.652663 | 2110.808838 |             |
| 2038.019464  |              |             |             |             |             |
| LINC00159    | LINC00159    |             | 0           | 7.805420954 | 0           |
| ACTR2        | ACTR2        | 23724.22075 | 40813.26617 | 19990.79812 |             |
| 27357.32191  |              |             |             |             |             |
| MIR6804      | MIR6804      | 25.00027653 | 56.34151625 | 26.76144327 |             |
| 39.23040355  |              |             |             |             |             |
| MIR6803      | MIR6803      | 8.33342551  | 2.641008574 | 7.805420954 |             |

|             |         |             |             |             |
|-------------|---------|-------------|-------------|-------------|
| 10.78836098 |         |             |             |             |
| MIR6801     | MIR6801 | 1.041678189 | 2.641008574 | 3.345180409 |
| 5.884560532 |         |             |             |             |
| MIR6802     | MIR6802 | 59.37565676 | 72.1875677  | 60.21324736 |
| 51.9802847  |         |             |             |             |
| MIR6800     | MIR6800 | 127.084739  | 139.9734544 | 64.6734879  |
| 105.9220896 |         |             |             |             |
| MIR6799     | MIR6799 | 3.125034566 | 7.923025723 | 1.115060136 |
| 0.980760089 |         |             |             |             |
| MIR6798     | MIR6798 | 45.8338403  | 25.52974955 | 35.68192436 |
| 23.53824213 |         |             |             |             |
| MIR6797     | MIR6797 | 22.91692015 | 37.85445623 | 30.10662368 |
| 13.73064124 |         |             |             |             |
| MIR6796     | MIR6796 | 7.291747321 | 6.16235334  | 18.95602232 |
| 10.78836098 |         |             |             |             |
| MIR6794     | MIR6794 | 0           | 0.880336191 | 0           |
| 0.980760089 |         |             |             |             |
| MIR6793     | MIR6793 | 1.041678189 | 1.760672383 | 0           |
| 0           |         |             |             |             |
| MIR6791     | MIR6791 | 26.04195472 | 6.16235334  | 22.30120273 |
| 24.51900222 |         |             |             |             |
| MIR6792     | MIR6792 | 0           | 0.880336191 | 0           |
| 0           |         |             |             |             |
| MIR6790     | MIR6790 | 17.70852921 | 17.60672383 | 16.72590204 |
| 17.6536816  |         |             |             |             |
| MIR6789     | MIR6789 | 538.5476236 | 426.9630528 | 342.3234618 |
| 464.880282  |         |             |             |             |
| MIR6787     | MIR6787 | 1.041678189 | 0           | 0           |
| 1.961520177 |         |             |             |             |
| MIR6786     | MIR6786 | 2.083356377 | 4.401680957 | 0           |
| 0           |         |             |             |             |
| MIR6785     | MIR6785 | 4.166712755 | 12.32470668 | 12.2656615  |
| 9.807600887 |         |             |             |             |
| UQCC2       | UQCC2   | 3572.956187 | 3267.807943 | 2549.027472 |
| 2574.495233 |         |             |             |             |
| CAMK2N2     | CAMK2N2 | 3.125034566 | 2.641008574 | 16.72590204 |
| 13.73064124 |         |             |             |             |
| DGCR6L      | DGCR6L  | 2759.405522 | 2610.196808 | 2688.409989 |
| 2315.574569 |         |             |             |             |
| JMY         | JMY     | 445.8382648 | 551.0904558 | 764.9312535 |
| 676.7244612 |         |             |             |             |
| TMEM237     | TMEM237 | 1891.687591 | 1674.399436 | 1129.555918 |
| 1149.450824 |         |             |             |             |
| UBR3        | UBR3    | 1369.806818 | 2064.388369 | 1592.305875 |
| 1732.022317 |         |             |             |             |
| FAM192A     | FAM192A | 6509.447001 | 5529.391618 | 4333.12369  |
| 5294.142959 |         |             |             |             |
| TMEM156     | TMEM156 | 1612.517836 | 1302.017227 | 854.1360644 |
| 1123.951062 |         |             |             |             |
| GBA2        | GBA2    | 4142.754156 | 3426.268457 | 3505.749068 |
| 4041.712325 |         |             |             |             |
| MBOAT2      | MBOAT2  | 207.2939596 | 503.5523015 | 204.0560049 |
| 282.4589055 |         |             |             |             |
| ZNF215      | ZNF215  | 281.2531109 | 249.1351422 | 50.17770613 |
| 166.7292151 |         |             |             |             |

|              |              |             |             |             |
|--------------|--------------|-------------|-------------|-------------|
| WNT1         | WNT1         | 2.083356377 | 8.803361914 | 40.14216491 |
| 11.76912106  |              |             |             |             |
| PSD          | PSD          | 58.33397857 | 124.127403  | 162.7987799 |
| 158.8831344  |              |             |             |             |
| FLNA         | FLNA         | 34584.75754 | 129448.1549 | 35128.85453 |
| 44077.3199   |              |             |             |             |
| AGPAT3       | AGPAT3       | 3967.752221 | 5644.715659 | 3123.283442 |
| 3333.603541  |              |             |             |             |
| SCAF11       | SCAF11       | 6722.99103  | 7209.953408 | 8209.072723 |
| 7892.176434  |              |             |             |             |
| PRCP         | PRCP         | 2785.447477 | 2828.520183 | 2237.925693 |
| 2161.595235  |              |             |             |             |
| DDX1         | DDX1         | 13605.35882 | 9374.700103 | 9067.669028 |
| 10598.09352  |              |             |             |             |
| DAPK1        | DAPK1        | 223.9608106 | 798.4649256 | 101.4704724 |
| 216.7479796  |              |             |             |             |
| CTNS         | CTNS         | 1913.562833 | 1263.282435 | 1901.177532 |
| 1209.277189  |              |             |             |             |
| CDKN2B       | CDKN2B       | 1055.220005 | 113.5633687 | 247.5433503 |
| 54.92256497  |              |             |             |             |
| ACSL5        | ACSL5        | 10769.91079 | 7669.4889   | 7111.853549 |
| 7149.741046  |              |             |             |             |
| GATA1        | GATA1        | 0           | 0.880336191 | 0           |
| 2.942280266  |              |             |             |             |
| DERL2        | DERL2        | 4335.464621 | 3124.313143 | 3515.78461  |
| 2976.606869  |              |             |             |             |
| MIB1         | MIB1         | 2539.611424 | 2534.487895 | 2221.199791 |
| 1876.19405   |              |             |             |             |
| GLYR1        | GLYR1        | 4788.594633 | 5985.405766 | 4844.936292 |
| 5073.471939  |              |             |             |             |
| ADAMTS16     | ADAMTS16     | 0           | 5.282017149 | 3.345180409 |
| 0.980760089  |              |             |             |             |
| ALG8         | ALG8         | 5062.555997 | 5315.469924 | 3613.909902 |
| 4597.803296  |              |             |             |             |
| NOP56        | NOP56        | 16705.39311 | 12066.76818 | 16104.81355 |
| 15559.75881  |              |             |             |             |
| LOC100506076 | LOC100506076 |             | 17.70852921 | 17.60672383 |
| 14.49578177  | 13.73064124  |             |             |             |
| LOC100128568 | LOC100128568 |             | 28.12531109 | 65.14487817 |
| 10.03554123  | 18.63444168  |             |             |             |
| WDR1         | WDR1         | 61321.51161 | 49588.45733 | 33398.2812  |
| 39024.44393  |              |             |             |             |
| HTR2B        | HTR2B        | 73.9591514  | 47.53815434 | 30.10662368 |
| 26.48052239  |              |             |             |             |
| TSPYL1       | TSPYL1       | 670.8407535 | 1382.127821 | 1369.293847 |
| 1379.929445  |              |             |             |             |
| TRPM2        | TRPM2        | 236.4609488 | 96.83698106 | 166.1439603 |
| 82.38384745  |              |             |             |             |
| GHR          | GHR          | 0           | 1.760672383 | 0           |
| 0            |              |             |             |             |
| USMG5        | USMG5        | 7010.49421  | 8367.5955   | 6610.076488 |
| 6535.785231  |              |             |             |             |

|              |              |             |             |             |             |             |             |
|--------------|--------------|-------------|-------------|-------------|-------------|-------------|-------------|
| NMBR         | NMBR         | 0           | 0           | 0           | 2.942280266 |             |             |
| FAU          | FAU          | 10678.24311 |             | 10748.9049  |             | 11771.68986 |             |
| 10908.01371  |              |             |             |             |             |             |             |
| ADCY9        | ADCY9        | 129.1680954 |             | 248.254806  |             | 227.4722678 |             |
| 167.7099752  |              |             |             |             |             |             |             |
| TRIM25       | TRIM25       | 1767.727886 |             | 4184.237918 |             | 2540.10699  |             |
| 2019.385023  |              |             |             |             |             |             |             |
| ERBB3        | ERBB3        | 14.58349464 |             | 17.60672383 |             | 37.91204463 |             |
| 50.99952461  |              |             |             |             |             |             |             |
| C17orf104    | C17orf104    |             |             | 45.8338403  |             | 27.29042193 |             |
| 28.99156354  | 52.96104479  |             |             |             |             |             |             |
| COG6         | COG6         | 1857.31221  |             | 1713.134229 |             | 2138.685341 |             |
| 1809.502364  |              |             |             |             |             |             |             |
| FLJ45513     | FLJ45513     |             |             | 12.50013826 |             | 14.96571525 |             |
| 7.805420954  | 10.78836098  |             |             |             |             |             |             |
| CRLF3        | CRLF3        | 9578.230945 |             | 8717.088968 |             | 8589.30823  |             |
| 8717.976428  |              |             |             |             |             |             |             |
| RASD1        | RASD1        | 17.70852921 |             | 17.60672383 |             | 15.61084191 |             |
| 12.74988115  |              |             |             |             |             |             |             |
| TMPRSS4-AS1  | TMPRSS4-AS1  |             |             | 0           | 0.880336191 | 0           | 0           |
| PLXNC1       | PLXNC1       | 518.755738  |             | 1638.305652 |             | 924.384853  |             |
| 937.6066448  |              |             |             |             |             |             |             |
| CDK6         | CDK6         | 6204.235292 |             | 10299.0531  |             | 5207.330836 |             |
| 4740.013509  |              |             |             |             |             |             |             |
| GCA          | GCA          | 848.9677238 |             | 1184.052177 |             | 1574.464912 |             |
| 1374.044884  |              |             |             |             |             |             |             |
| THBD         | THBD         | 2.083356377 |             | 0           | 0           | 0           |             |
| MIRLET7I     | MIRLET7I     |             |             | 7.291747321 |             | 6.16235334  |             |
| 11.15060136  | 5.884560532  |             |             |             |             |             |             |
| MIR943       | MIR943       | 226.0441669 |             | 172.5458935 |             | 217.4367266 |             |
| 219.6902599  |              |             |             |             |             |             |             |
| MIR942       | MIR942       | 0           | 1.760672383 | 0           |             | 0           |             |
| TMEM120A     | TMEM120A     |             |             | 1316.681231 |             | 1770.356081 |             |
| 951.1462962  | 1438.77505   |             |             |             |             |             |             |
| LOC115110    | LOC115110    |             |             | 787.5087107 |             | 776.4565208 |             |
| 579.8312709  | 849.3382368  |             |             |             |             |             |             |
| TMEM213      | TMEM213      | 5.208390943 |             | 86.27294676 |             | 0           | 49.03800443 |
| C17orf67     | C17orf67     |             |             | 153.1266937 |             | 191.0329535 |             |
| 298.8361165  | 282.4589055  |             |             |             |             |             |             |
| ERCC2        | ERCC2        | 627.0902696 |             | 601.2696188 |             | 450.4842951 |             |
| 477.6301632  |              |             |             |             |             |             |             |
| FAM193B      | FAM193B      | 322.9202385 |             | 908.5069496 |             | 514.0427228 |             |
| 899.3570013  |              |             |             |             |             |             |             |
| AKR1C4       | AKR1C4       | 0           | 3.521344766 | 4.460240545 |             | 4.903800443 |             |
| COL1A2       | COL1A2       | 8.33342551  |             | 24.64941336 |             | 0           | 0           |
| PXT1         | PXT1         | 13.54181645 |             | 5.282017149 |             | 8.92048109  |             |
| 19.61520177  |              |             |             |             |             |             |             |
| KCNK9        | KCNK9        | 0           | 0           | 2.230120273 |             | 0           |             |
| LOC101929528 | LOC101929528 |             |             | 0           | 0           | 0           | 2.942280266 |
| TAF2         | TAF2         | 8232.382725 |             | 5002.07024  |             | 5487.210931 |             |

|             |          |             |             |             |
|-------------|----------|-------------|-------------|-------------|
| 5300.027519 |          |             |             |             |
| RHBDD3      | RHBDD3   | 1629.184687 | 1314.341934 | 1047.041468 |
| 1055.297855 |          |             |             |             |
| MTM1        | MTM1     | 3120.867853 | 3567.122248 | 2630.426861 |
| 2899.126822 |          |             |             |             |
| KIFC2       | KIFC2    | 63.54236951 | 135.5717735 | 79.16926967 |
| 168.6907353 |          |             |             |             |
| UGT8        | UGT8     | 22.91692015 | 11.44437049 | 7.805420954 |
| 19.61520177 |          |             |             |             |
| ARHGEF18    | ARHGEF18 |             | 1408.348911 | 3054.766584 |
| 1857.690187 |          | 2033.115664 |             |             |
| RIMBP3B     | RIMBP3B  | 12.50013826 | 10.5640343  | 16.72590204 |
| 30.40356275 |          |             |             |             |
| ARSJ        | ARSJ     | 0           | 0.880336191 | 0           |
| 3.923040355 |          |             |             |             |
| POLR2J      | POLR2J   | 3478.163472 | 2928.878509 | 2778.72986  |
| 2329.305211 |          |             |             |             |
| SNHG16      | SNHG16   | 4846.928612 | 2441.172259 | 5803.888009 |
| 5008.741773 |          |             |             |             |
| C11orf80    | C11orf80 |             | 490.6304269 | 626.7993683 |
| 585.4065715 |          | 514.8990466 |             |             |
| NAT8        | NAT8     | 0           | 0           | 0.980760089 |
| AIM2        | AIM2     | 585.423142  | 1346.914373 | 1037.005927 |
| 2125.307112 |          |             |             |             |
| MAFG        | MAFG     | 2392.734799 | 1816.133563 | 2186.632927 |
| 1700.637994 |          |             |             |             |
| MAFK        | MAFK     | 59.37565676 | 283.4682536 | 61.32830749 |
| 90.22992816 |          |             |             |             |
| PDCD4       | PDCD4    | 6002.149723 | 5055.770747 | 24567.00492 |
| 19462.2032  |          |             |             |             |
| TMEFF1      | TMEFF1   | 76.04250777 | 76.58924866 | 81.39938995 |
| 55.90332505 |          |             |             |             |
| PHF2        | PHF2     | 150.0016592 | 582.7825587 | 263.1541922 |
| 285.4011858 |          |             |             |             |
| KIF15       | KIF15    | 4391.715244 | 5195.744202 | 2053.940771 |
| 3432.66031  |          |             |             |             |
| GNAT1       | GNAT1    | 1.041678189 | 2.641008574 | 0           |
| FAT1        | FAT1     | 0           | 1.760672383 | 0           |
| 0.980760089 |          |             |             |             |
| PSME4       | PSME4    | 938.552048  | 1140.915704 | 701.3728257 |
| 815.9923938 |          |             |             |             |
| PSMC4       | PSMC4    | 12835.55864 | 9231.205303 | 8510.13896  |
| 9293.6826   |          |             |             |             |
| ALX3        | ALX3     | 0           | 3.521344766 | 12.2656615  |
| 6.865320621 |          |             |             |             |
| MCAM        | MCAM     | 81.25089872 | 553.7314644 | 108.1608332 |
| 373.6695938 |          |             |             |             |
| FAM179B     | FAM179B  | 657.2989371 | 711.3116427 | 1299.045059 |
| 714.9741046 |          |             |             |             |
| RSPH10B     | RSPH10B  | 6.250069132 | 3.521344766 | 10.03554123 |
| 8.826840798 |          |             |             |             |
| MAATS1      | MAATS1   | 6.250069132 | 0.880336191 | 60.21324736 |
| 41.19192372 |          |             |             |             |

|                |                |             |             |             |             |             |
|----------------|----------------|-------------|-------------|-------------|-------------|-------------|
| IFNK           | IFNK           | 0           | 0           | 0           | 0.980760089 |             |
| UGGT2          | UGGT2          | 12.50013826 |             | 16.72638764 | 0           | 10.78836098 |
| ZRANB2         | ZRANB2         | 6592.781256 |             | 6735.452201 | 7089.552346 |             |
| 7233.105654    |                |             |             |             |             |             |
| HIPK1-AS1      | HIPK1-AS1      |             |             | 30.20866747 | 68.66622293 |             |
| 45.71746559    | 63.74940576    |             |             |             |             |             |
| GPR116         | GPR116         | 0           | 0           | 0           | 2.942280266 |             |
| CHD3           | CHD3           | 1184.388101 |             | 2616.359161 | 1623.527558 |             |
| 1913.462933    |                |             |             |             |             |             |
| CDKL5          | CDKL5          | 36.4587366  |             | 41.375801   | 88.08975076 |             |
| 27.46128248    |                |             |             |             |             |             |
| RPL36A-HNRNPH2 | RPL36A-HNRNPH2 |             |             | 13197.02097 | 14091.54142 |             |
| 17960.27361    | 16095.25382    |             |             |             |             |             |
| LOC158960      | LOC158960      |             |             | 59.37565676 | 67.78588674 |             |
| 128.2319157    | 53.94180488    |             |             |             |             |             |
| LINC01311      | LINC01311      |             |             | 39.58377117 | 40.49546481 |             |
| 16.72590204    | 57.86484523    |             |             |             |             |             |
| DDX11L5        | DDX11L5        | 4.166712755 |             | 2.641008574 | 1.115060136 |             |
| 2.942280266    |                |             |             |             |             |             |
| LINC00571      | LINC00571      |             |             | 2.083356377 | 0           | 0           |
| 2.942280266    |                |             |             |             |             |             |
| LIPE-AS1       | LIPE-AS1       |             |             | 42.70880574 | 46.65781815 |             |
| 37.91204463    | 30.40356275    |             |             |             |             |             |
| C1orf145       | C1orf145       |             |             | 2.083356377 | 2.641008574 |             |
| 13.38072164    | 12.74988115    |             |             |             |             |             |
| ZNRF3-AS1      | ZNRF3-AS1      |             |             | 0           | 0           | 2.942280266 |
| AKAP2          | AKAP2          | 5339.642395 |             | 8321.818018 | 5224.056738 |             |
| 6263.133926    |                |             |             |             |             |             |
| ADNP           | ADNP           | 1107.303915 |             | 1607.493886 | 1178.618564 |             |
| 1273.026595    |                |             |             |             |             |             |
| SH3GLB2        | SH3GLB2        | 2085.439734 |             | 2471.984026 | 1411.666133 |             |
| 2026.250343    |                |             |             |             |             |             |
| IGFL4          | IGFL4          | 0           | 0.880336191 | 2.230120273 | 0           |             |
| LOC101927667   | LOC101927667   |             |             | 2.083356377 | 1.760672383 |             |
| 3.345180409    | 2.942280266    |             |             |             |             |             |
| RUNX3          | RUNX3          | 8308.425233 |             | 8120.22103  | 9030.872044 |             |
| 7738.1971      |                |             |             |             |             |             |
| TRIM36         | TRIM36         | 4.166712755 |             | 6.16235334  | 0           | 4.903800443 |
| ZNF121         | ZNF121         | 323.9619167 |             | 296.6732965 | 501.7770613 |             |
| 379.5541543    |                |             |             |             |             |             |
| SMC01          | SMC01          | 2.083356377 |             | 2.641008574 | 0           | 0           |
| C9orf84        | C9orf84        | 8.33342551  |             | 14.96571525 | 10.03554123 |             |
| 13.73064124    |                |             |             |             |             |             |
| PLEKHM3        | PLEKHM3        | 284.3781455 |             | 352.1344766 | 575.3710303 |             |
| 423.6883583    |                |             |             |             |             |             |
| C5orf60        | C5orf60        | 0           | 0           | 7.805420954 | 0           |             |
| IL10RB         | IL10RB         | 4339.631334 |             | 3885.803949 | 3225.868974 |             |
| 3766.11874     |                |             |             |             |             |             |
| PTN            | PTN            | 0           | 0.880336191 | 0           | 0           |             |
| RP2            | RP2            | 1558.35057  |             | 1336.350339 | 1838.734165 |             |



|              |              |             |             |             |             |
|--------------|--------------|-------------|-------------|-------------|-------------|
| 1072.951537  |              |             |             |             |             |
| WWP1         | WWP1         | 1611.476158 | 1725.458935 | 1966.96608  |             |
| 1580.004503  |              |             |             |             |             |
| DCAF12       | DCAF12       | 5566.72824  | 5135.001005 | 4177.01527  |             |
| 4501.688807  |              |             |             |             |             |
| ICA1L        | ICA1L        | 218.7524196 | 338.9294337 | 286.570455  |             |
| 349.1505916  |              |             |             |             |             |
| CMTM5        | CMTM5        | 0           | 0           | 2.230120273 | 0           |
| DNM1         | DNM1         | 0           | 3.521344766 | 7.805420954 | 14.71140133 |
| C6orf99      | C6orf99      | 8.33342551  | 14.08537906 | 11.15060136 |             |
| 6.865320621  |              |             |             |             |             |
| IP011-LRRC70 | IP011-LRRC70 |             | 1305.22277  | 1103.061248 |             |
| 1435.082395  |              | 1366.198804 |             |             |             |
| DAAM2        | DAAM2        | 2.083356377 | 0           | 7.805420954 | 0.980760089 |
| NCLN         | NCLN         | 5652.145852 | 5439.597327 | 4451.320064 |             |
| 5102.894741  |              |             |             |             |             |
| PRMT6        | PRMT6        | 2078.147986 | 1738.663978 | 1869.955849 |             |
| 2227.306161  |              |             |             |             |             |
| NCL          | NCL          | 54262.05853 | 46078.55693 | 54939.01291 |             |
| 60754.16445  |              |             |             |             |             |
| UVSSA        | UVSSA        | 1111.470627 | 721.875677  | 1339.187224 |             |
| 822.8577144  |              |             |             |             |             |
| TTC39A       | TTC39A       | 3.125034566 | 1.760672383 | 8.92048109  |             |
| 0.980760089  |              |             |             |             |             |
| MTFP1        | MTFP1        | 4383.381818 | 2471.984026 | 2895.811174 |             |
| 2590.187394  |              |             |             |             |             |
| CDKL3        | CDKL3        | 96.87607155 | 93.31563629 | 150.5331184 |             |
| 110.82589    |              |             |             |             |             |
| MRPL51       | MRPL51       | 10592.8255  | 9950.439972 | 7185.447518 |             |
| 7557.737243  |              |             |             |             |             |
| MIR26B       | MIR26B       | 1.041678189 | 7.042689532 | 4.460240545 |             |
| 4.903800443  |              |             |             |             |             |
| JMJD1C-AS1   | JMJD1C-AS1   |             | 55.208944   | 48.41849053 |             |
| 103.7005927  |              | 61.78788559 |             |             |             |
| OR2C3        | OR2C3        | 0           | 0           | 5.575300681 | 1.961520177 |
| HEMGN        | HEMGN        | 34.37538023 | 71.30723151 | 100.3554123 |             |
| 120.6334909  |              |             |             |             |             |
| LRRC56       | LRRC56       | 26.04195472 | 22.00840479 | 61.32830749 |             |
| 35.30736319  |              |             |             |             |             |
| ALK          | ALK          | 7.291747321 | 4.401680957 | 2.230120273 |             |
| 5.884560532  |              |             |             |             |             |
| CHTF8        | CHTF8        | 9452.187884 | 9659.048692 | 9128.997336 |             |
| 9487.873098  |              |             |             |             |             |
| PIG0         | PIG0         | 3643.790304 | 3181.534996 | 2793.225641 |             |
| 3169.816607  |              |             |             |             |             |
| C17orf100    | C17orf100    |             | 98.95942793 | 127.6487478 |             |
| 204.0560049  |              | 191.2482173 |             |             |             |
| WDYHV1       | WDYHV1       | 778.133607  | 1098.659567 | 659.0005405 |             |
| 858.1650776  |              |             |             |             |             |
| RMND5B       | RMND5B       | 1446.891004 | 1267.684116 | 1753.989594 |             |

|             |            |             |             |             |             |
|-------------|------------|-------------|-------------|-------------|-------------|
| 1831.079086 |            |             |             |             |             |
| AMD1        | AMD1       | 9463.646344 | 10346.59126 | 9260.574432 |             |
| 9383.912528 |            |             |             |             |             |
| AMDHD2      | AMDHD2     | 1413.557302 | 1346.914373 | 1110.599896 |             |
| 1397.583126 |            |             |             |             |             |
| TANC1       | TANC1      | 19.79188559 | 70.42689532 | 4.460240545 |             |
| 85.32612771 |            |             |             |             |             |
| CERS5       | CERS5      | 4993.805237 | 3295.098365 | 4090.04058  |             |
| 3789.656983 |            |             |             |             |             |
| CYP4F3      | CYP4F3     | 23.95859834 | 0           | 36.7969845  | 14.71140133 |
| SLC17A1     | SLC17A1    | 0           | 0           | 3.923040355 |             |
| KCTD5       | KCTD5      | 5247.974715 | 3808.334364 | 2990.591285 |             |
| 3329.680501 |            |             |             |             |             |
| PKNOX1      | PKNOX1     | 1756.269426 | 1522.981611 | 2040.560049 |             |
| 1630.023267 |            |             |             |             |             |
| SSB         | SSB        | 5277.141704 | 4386.715242 | 5852.950655 |             |
| 5524.621579 |            |             |             |             |             |
| HIST1H1A    | HIST1H1A   |             | 435.4214829 | 1313.461598 |             |
| 268.7294928 |            | 676.7244612 |             |             |             |
| SRPK1       | SRPK1      | 10248.03002 | 10749.78523 | 7342.670997 |             |
| 10264.63509 |            |             |             |             |             |
| CXCL13      | CXCL13     | 205.2106032 | 345.091787  | 421.4927315 |             |
| 1491.736095 |            |             |             |             |             |
| ARFGEF2     | ARFGEF2    | 1991.688697 | 3823.300079 | 2640.462403 |             |
| 2772.608771 |            |             |             |             |             |
| PFKFB4      | PFKFB4     | 75.00082959 | 298.4339689 | 347.8987625 |             |
| 1181.815907 |            |             |             |             |             |
| PLA2G15     | PLA2G15    | 1388.557026 | 952.5237591 | 1109.484836 |             |
| 1168.085266 |            |             |             |             |             |
| KIAA1731NL  | KIAA1731NL |             | 3.125034566 | 3.521344766 | 0           |
| 0           |            |             |             |             |             |
| S100A4      | S100A4     | 15124.12562 | 33693.98739 | 5259.738663 |             |
| 14368.1353  |            |             |             |             |             |
| CLIP1       | CLIP1      | 5201.099196 | 4340.057424 | 6467.34879  |             |
| 5559.928943 |            |             |             |             |             |
| ST8SIA4     | ST8SIA4    | 8358.425786 | 7594.660324 | 4735.660399 |             |
| 3733.753658 |            |             |             |             |             |
| RHCE        | RHCE       | 346.8788368 | 242.0924526 | 283.2252746 |             |
| 221.65178   |            |             |             |             |             |
| CEP70       | CEP70      | 515.6307034 | 357.4164937 | 481.7059789 |             |
| 413.8807574 |            |             |             |             |             |
| THUMPD1     | THUMPD1    | 4567.758857 | 4190.400271 | 5860.756076 |             |
| 4826.320396 |            |             |             |             |             |
| TTC27       | TTC27      | 4024.002843 | 2685.90572  | 3654.052067 |             |
| 3772.984061 |            |             |             |             |             |
| IP011       | IP011      | 4084.420178 | 3499.336361 | 4499.26765  |             |
| 4198.63394  |            |             |             |             |             |
| NOX3        | NOX3       | 0           | 0           | 0.980760089 |             |
| FAM98A      | FAM98A     | 5663.604312 | 4185.118254 | 4434.594162 |             |
| 4092.71185  |            |             |             |             |             |

|             |             |             |             |             |
|-------------|-------------|-------------|-------------|-------------|
| DNAJB4      | DNAJB4      | 452.0883339 | 337.1687613 | 1504.216124 |
| 458.9957215 |             |             |             |             |
| RER1        | RER1        | 11106.37285 | 9092.992521 | 7932.537809 |
| 8068.713249 |             |             |             |             |
| PLG         | PLG         | 0           | 0           | 0.980760089 |
| ME2         | ME2         | 10471.99083 | 7968.803205 | 9838.175582 |
| 9707.563358 |             |             |             |             |
| EBLN1       | EBLN1       | 0           | 0           | 6.865320621 |
| ALDH1A1     | ALDH1A1     | 1.041678189 | 0           | 0           |
| GIMAP5      | GIMAP5      | 9798.025043 | 8236.425407 | 11763.88444 |
| 11756.37118 |             |             |             |             |
| GIMAP4      | GIMAP4      | 8924.057043 | 10528.82085 | 11323.43568 |
| 11709.2947  |             |             |             |             |
| ANXA4       | ANXA4       | 3996.91921  | 2766.89665  | 1639.1384   |
| 2130.210913 |             |             |             |             |
| GMEB2       | GMEB2       | 1642.726504 | 2174.430393 | 1726.113091 |
| 1866.386449 |             |             |             |             |
| NHLH1       | NHLH1       | 7.291747321 | 12.32470668 | 3.345180409 |
| 17.6536816  |             |             |             |             |
| TM9SF1      | TM9SF1      | 5271.933313 | 3774.881589 | 3772.248441 |
| 3688.638693 |             |             |             |             |
| GPSM2       | GPSM2       | 2508.361078 | 2645.410255 | 1102.794475 |
| 1115.124221 |             |             |             |             |
| PI4K2B      | PI4K2B      | 5495.894124 | 4826.883338 | 4584.01222  |
| 3874.98311  |             |             |             |             |
| URB1        | URB1        | 1404.182198 | 1929.696932 | 2003.763065 |
| 1606.485025 |             |             |             |             |
| USP53       | USP53       | 263.5445817 | 405.8349843 | 943.3408753 |
| 1409.352247 |             |             |             |             |
| NUDT5       | NUDT5       | 9307.394616 | 7923.025723 | 6030.245217 |
| 6875.128222 |             |             |             |             |
| C16orf72    | C16orf72    |             | 1979.188559 | 2747.529253 |
| 2758.658777 | 1871.290249 |             |             |             |
| TRIM31      | TRIM31      | 1.041678189 | 0           | 0.980760089 |
| SYNM        | SYNM        | 82.29257691 | 279.9469089 | 206.2861252 |
| 120.6334909 |             |             |             |             |
| TPTE        | TPTE        | 0           | 18.48706002 | 2.230120273 |
| CHMP4C      | CHMP4C      | 6.250069132 | 14.96571525 | 5.575300681 |
| 9.807600887 |             |             |             |             |
| USP51       | USP51       | 19.79188559 | 29.05109432 | 15.61084191 |
| 25.49976231 |             |             |             |             |
| GJD3        | GJD3        | 77.08418596 | 110.9223601 | 74.70902913 |
| 115.7296905 |             |             |             |             |
| NID1        | NID1        | 4.166712755 | 19.36739621 | 0           |
| ZNF35       | ZNF35       | 244.7943743 | 244.7334612 | 224.1270874 |
| 258.9206634 |             |             |             |             |
| LENG9       | LENG9       | 20.83356377 | 55.46118006 | 57.98312709 |
| 56.88408514 |             |             |             |             |
| TMEM133     | TMEM133     | 0           | 1.760672383 | 0           |
| FAM35A      | FAM35A      | 4539.633546 | 3195.620375 | 2942.6437   |

|             |             |             |             |             |             |
|-------------|-------------|-------------|-------------|-------------|-------------|
| 3471.890714 |             |             |             |             |             |
| TLN2        | TLN2        | 9.375103698 | 6.16235334  | 3.345180409 |             |
| 39.23040355 |             |             |             |             |             |
| DONSON      | DONSON      | 5515.686009 | 4140.221108 | 2425.255796 |             |
| 2955.030147 |             |             |             |             |             |
| HECW1       | HECW1       | 11.45846008 | 3.521344766 | 1.115060136 | 0           |
| DIS3        | DIS3        | 6425.071068 | 5214.231262 | 5496.131412 |             |
| 5880.637492 |             |             |             |             |             |
| VWA8        | VWA8        | 645.840477  | 889.1395534 | 753.7806521 |             |
| 953.2988062 |             |             |             |             |             |
| EMC4        | EMC4        | 9495.938368 | 7624.591754 | 8282.666692 |             |
| 7534.199001 |             |             |             |             |             |
| LOC729732   | LOC729732   |             | 5.208390943 | 5.282017149 |             |
| 16.72590204 | 7.846080709 |             |             |             |             |
| SCML2       | SCML2       | 322.9202385 | 339.8097699 | 301.0662368 |             |
| 405.0539166 |             |             |             |             |             |
| LEFTY2      | LEFTY2      | 0           | 0           | 1.961520177 |             |
| ZEB2        | ZEB2        | 593.7565676 | 1156.761756 | 381.3505666 |             |
| 867.9726785 |             |             |             |             |             |
| MFAP2       | MFAP2       | 1.041678189 | 0           | 5.575300681 | 0           |
| DR1         | DR1         | 7089.661752 | 6261.83133  | 6379.25904  |             |
| 5458.910654 |             |             |             |             |             |
| EPHB3       | EPHB3       | 5.208390943 | 0.880336191 | 0           | 0           |
| MAN2A1      | MAN2A1      | 1934.396396 | 3163.047936 | 1998.187764 |             |
| 2022.327303 |             |             |             |             |             |
| HARBI1      | HARBI1      | 539.5893017 | 421.6810357 | 572.0258499 |             |
| 337.3814705 |             |             |             |             |             |
| TTC9C       | TTC9C       | 1559.392248 | 1487.768164 | 1362.603487 |             |
| 1307.353198 |             |             |             |             |             |
| C2orf49     | C2orf49     | 1430.224153 | 1537.947326 | 1119.520377 |             |
| 1356.391203 |             |             |             |             |             |
| SLC25A23    | SLC25A23    |             | 694.7993519 | 1089.856205 |             |
| 950.0312361 | 1621.196427 |             |             |             |             |
| WDR77       | WDR77       | 7047.994625 | 4360.305156 | 6317.930732 |             |
| 7115.414443 |             |             |             |             |             |
| ABCA12      | ABCA12      | 2.083356377 | 0           | 10.03554123 | 22.55748204 |
| POLR1C      | POLR1C      | 3851.084264 | 2008.927189 | 4032.057453 |             |
| 3571.928243 |             |             |             |             |             |
| BRI3BP      | BRI3BP      | 2777.114051 | 2404.198139 | 1646.943821 |             |
| 1590.792864 |             |             |             |             |             |
| SAMD10      | SAMD10      | 1114.595662 | 1846.94533  | 797.2679974 |             |
| 1416.217568 |             |             |             |             |             |
| KIF20A      | KIF20A      | 6407.362539 | 5617.425238 | 3321.764146 |             |
| 5110.740822 |             |             |             |             |             |
| RIOK3       | RIOK3       | 4563.592145 | 3395.45669  | 5050.107357 |             |
| 3743.561258 |             |             |             |             |             |
| HSBP1       | HSBP1       | 5356.309246 | 5008.232593 | 4683.252572 |             |
| 4967.549849 |             |             |             |             |             |
| ZNF137P     | ZNF137P     | 21.87524196 | 49.29882672 | 24.531323   |             |
| 106.9028497 |             |             |             |             |             |

|             |             |             |             |              |
|-------------|-------------|-------------|-------------|--------------|
| DRAM1       | DRAM1       | 945.8437953 | 466.5781815 | 1004.669183  |
| 660.0515397 |             |             |             |              |
| MRPL18      | MRPL18      | 6853.200803 | 5555.801704 | 5515.087434  |
| 4981.28049  |             |             |             |              |
| CROCC       | CROCC       | 146.8766246 | 294.0322879 | 528.5385046  |
| 662.9938199 |             |             |             |              |
| IFT172      | IFT172      | 317.7118476 | 435.7664148 | 437.1035734  |
| 539.4180488 |             |             |             |              |
| SRP68       | SRP68       | 14058.48883 | 10284.96772 | 10685.62129  |
| 11857.38947 |             |             |             |              |
| TLN1        | TLN1        | 27845.09966 | 32096.1772  | 19607.21744  |
| 22920.36327 |             |             |             |              |
| KRT2        | KRT2        | 4.166712755 | 1.760672383 | 0 0          |
| KRT10       | KRT10       | 2862.531663 | 2568.821007 | 2731.897334  |
| 2104.71115  |             |             |             |              |
| ARRDC5      | ARRDC5      | 10.41678189 | 8.803361914 | 76.9391494   |
| 40.21116364 |             |             |             |              |
| NTRK3       | NTRK3       | 12.50013826 | 32.57243908 | 16.72590204  |
| 20.59596186 |             |             |             |              |
| RFC2        | RFC2        | 7808.419702 | 6193.165107 | 4461.355605  |
| 5891.425853 |             |             |             |              |
| DEGS1       | DEGS1       | 8912.598582 | 6636.854547 | 7824.376976  |
| 6076.789509 |             |             |             |              |
| SLC15A3     | SLC15A3     | 7.291747321 | 7.042689532 | 26.76144327  |
| 69.6339663  |             |             |             |              |
| PCDH12      | PCDH12      | 102.0844625 | 222.7250564 | 3.345180409  |
| 184.3828967 |             |             |             |              |
| MY010       | MY010       | 4.166712755 | 21.12806859 | 1.115060136  |
| 7.846080709 |             |             |             |              |
| AFF4        | AFF4        | 1516.683443 | 1711.373556 | 2641.577463  |
| 1528.024218 |             |             |             |              |
| SLC15A4     | SLC15A4     | 1713.56062  | 1356.598071 | 1120.635437  |
| 1627.080987 |             |             |             |              |
| RPS19BP1    | RPS19BP1    |             | 4806.303163 | 3552.156532  |
| 3935.047221 | 3754.349619 |             |             |              |
| EPN3        | EPN3        | 2.083356377 | 0.880336191 | 0 0          |
| DACH1       | DACH1       | 8.33342551  | 27.29042193 | 0 17.6536816 |
| IWS1        | IWS1        | 3928.16845  | 3812.736045 | 3726.530975  |
| 3793.580023 |             |             |             |              |
| PINX1       | PINX1       | 1772.936277 | 1091.616877 | 1658.094423  |
| 1514.293577 |             |             |             |              |
| CLN6        | CLN6        | 308.3367439 | 835.4390457 | 256.4638313  |
| 197.1327778 |             |             |             |              |
| MAP7D1      | MAP7D1      | 3950.043692 | 7017.159782 | 3306.153304  |
| 3437.564111 |             |             |             |              |
| VPS37C      | VPS37C      | 63.54236951 | 172.5458935 | 120.4264947  |
| 168.6907353 |             |             |             |              |
| GPN2        | GPN2        | 2401.068225 | 1878.637433 | 1838.734165  |
| 1818.329204 |             |             |             |              |
| MAP3K12     | MAP3K12     | 433.3381265 | 669.0555055 | 526.3083843  |

|                 |              |             |             |             |
|-----------------|--------------|-------------|-------------|-------------|
| 558.0524905     |              |             |             |             |
| HEATR1 HEATR1   | 6553.197485  | 8280.442217 | 6842.008996 |             |
| 7889.234153     |              |             |             |             |
| ANKRD24 ANKRD24 | 16.66685102  | 12.32470668 | 0           | 52.96104479 |
| SLC17A5 SLC17A5 | 1009.386165  | 581.9022225 | 1498.640823 |             |
| 905.2415618     |              |             |             |             |
| UBE2MP1 UBE2MP1 | 1.041678189  | 7.923025723 | 2.230120273 |             |
| 2.942280266     |              |             |             |             |
| PGM5P2 PGM5P2   | 33.33370204  | 26.41008574 | 32.33674395 |             |
| 13.73064124     |              |             |             |             |
| LOC100506548    | LOC100506548 | 377.0875043 | 315.1603565 |             |
| 647.8499392     | 305.9971477  |             |             |             |
| PTPRZ1 PTPRZ1   | 0 0          | 0           | 0.980760089 |             |
| SLC4A3 SLC4A3   | 2.083356377  | 0           | 0           | 0.980760089 |
| PIGB PIGB       | 2118.773436  | 1647.98935  | 1334.726983 |             |
| 1460.351772     |              |             |             |             |
| ATP9A ATP9A     | 171.8769011  | 460.4158281 | 105.9307129 |             |
| 279.5166253     |              |             |             |             |
| LOC100652824    | LOC100652824 | 1.041678189 | 0           | 8.92048109  |
| 0               |              |             |             |             |
| TNFRSF10A       | TNFRSF10A    | 882.3014258 | 713.0723151 |             |
| 2603.665418     | 1449.563411  |             |             |             |
| C9orf53 C9orf53 | 1.041678189  | 0           | 0           | 0           |
| NAPB NAPB       | 722.924663   | 843.3620714 | 1064.88243  |             |
| 976.8370483     |              |             |             |             |
| HLA-J HLA-J     | 2.083356377  | 17.60672383 | 42.37228518 |             |
| 26.48052239     |              |             |             |             |
| SEC14L1P1       | SEC14L1P1    | 66.66740408 | 58.10218863 |             |
| 36.7969845      | 101.0182891  |             |             |             |
| SLC45A3 SLC45A3 | 5.208390943  | 11.44437049 | 0           | 5.884560532 |
| SHISA2 SHISA2   | 19.79188559  | 182.2295916 | 23.41626286 |             |
| 15.69216142     |              |             |             |             |
| ZYG11A ZYG11A   | 20.83356377  | 29.93143051 | 18.95602232 |             |
| 10.78836098     |              |             |             |             |
| SMIM4 SMIM4     | 405.2128154  | 619.7566788 | 495.0867005 |             |
| 373.6695938     |              |             |             |             |
| MPV17L MPV17L   | 11.45846008  | 22.00840479 | 11.15060136 |             |
| 6.865320621     |              |             |             |             |
| TTC36 TTC36     | 11.45846008  | 11.44437049 | 7.805420954 |             |
| 5.884560532     |              |             |             |             |
| RFPL3 RFPL3     | 5.208390943  | 3.521344766 | 20.07108245 |             |
| 3.923040355     |              |             |             |             |
| SCRN3 SCRN3     | 885.4264604  | 730.6790389 | 556.415008  |             |
| 569.8216115     |              |             |             |             |
| ELAC2 ELAC2     | 11941.79876  | 7459.968886 | 8740.956408 |             |
| 7709.755057     |              |             |             |             |
| SLC37A2 SLC37A2 | 23.95859834  | 46.65781815 | 0           | 44.13420399 |
| ARHGEF12        | ARHGEF12     | 941.6770826 | 1490.409172 |             |
| 734.8246298     | 975.8562882  |             |             |             |
| IL16 IL16       | 8827.180971  | 3566.241912 | 8923.826271 |             |

|                 |               |               |               |   |  |
|-----------------|---------------|---------------|---------------|---|--|
| 9691.871196     |               |               |               |   |  |
| RNFT1 RNFT1     | 2340.65089    | 2289.754434   | 1836.504044   |   |  |
| 2464.650103     |               |               |               |   |  |
| ATP2B2 ATP2B2   | 0 12.32470668 | 1.115060136   | 1.961520177   |   |  |
| HMMR-AS1        | HMMR-AS1      | 832.3008728   | 816.0716495   |   |  |
| 478.3607985     | 661.0322998   |               |               |   |  |
| LOC101926933    | LOC101926933  | 10.41678189   | 14.08537906   |   |  |
| 16.72590204     | 9.807600887   |               |               |   |  |
| LOC729218       | LOC729218     | 382.2958953   | 568.6971797   |   |  |
| 647.8499392     | 479.5916834   |               |               |   |  |
| OR10AD1 OR10AD1 | 0 0           | 0 0.980760089 |               |   |  |
| OR56B1 OR56B1   | 0 0           | 3.345180409   | 5.884560532   |   |  |
| OR52N4 OR52N4   | 3.125034566   | 0.880336191   | 37.91204463   |   |  |
| 56.88408514     |               |               |               |   |  |
| RPS24 RPS24     | 7092.786787   | 8209.134985   | 7939.22817    |   |  |
| 7239.970975     |               |               |               |   |  |
| HDAC5 HDAC5     | 912.5100933   | 1582.844472   | 3501.288828   |   |  |
| 2497.995946     |               |               |               |   |  |
| TMEM178B        | TMEM178B      | 37.50041479   | 44.01680957   |   |  |
| 79.16926967     | 7.846080709   |               |               |   |  |
| MVB12A MVB12A   | 1161.47118    | 1194.616212   | 878.6673874   |   |  |
| 1081.778378     |               |               |               |   |  |
| SYNDIG1L        | SYNDIG1L      | 0 0           | 21.18614259   | 0 |  |
| CWC22 CWC22     | 3947.960335   | 3259.884917   | 4045.438174   |   |  |
| 4146.653655     |               |               |               |   |  |
| TGM2 TGM2       | 20.83356377   | 0.880336191   | 14.49578177   | 0 |  |
| SLC35D2 SLC35D2 | 648.9655116   | 311.6390118   | 642.2746385   |   |  |
| 489.3992842     |               |               |               |   |  |
| NEK10 NEK10     | 16.66685102   | 14.08537906   | 12.2656615    |   |  |
| 10.78836098     |               |               |               |   |  |
| GCC2 GCC2       | 2005.230513   | 1854.868355   | 4199.316473   |   |  |
| 2869.704019     |               |               |               |   |  |
| CHCHD6 CHCHD6   | 462.5051158   | 306.3569946   | 433.758393    |   |  |
| 578.6484523     |               |               |               |   |  |
| MIEN1 MIEN1     | 3537.539129   | 3882.282604   | 2404.069654   |   |  |
| 2685.321123     |               |               |               |   |  |
| LLPH LLPH       | 4259.422114   | 2932.399854   | 3124.398502   |   |  |
| 2963.856988     |               |               |               |   |  |
| MAP4K5 MAP4K5   | 975.0107846   | 1009.745612   | 1592.305875   |   |  |
| 1614.331106     |               |               |               |   |  |
| C2CD4A C2CD4A   | 30.20866747   | 29.93143051   | 79.16926967   |   |  |
| 134.3641321     |               |               |               |   |  |
| FAM199X FAM199X | 1779.186346   | 1817.894235   | 1489.720342   |   |  |
| 1436.81353      |               |               |               |   |  |
| TMEM132E        | TMEM132E      | 1.041678189   | 0 2.230120273 |   |  |
| 2.942280266     |               |               |               |   |  |
| RECK RECK       | 756.258365    | 720.1150046   | 773.8517346   |   |  |
| 1133.758663     |               |               |               |   |  |
| HAUS6 HAUS6     | 3155.243234   | 2770.417994   | 2518.920848   |   |  |
| 2355.785733     |               |               |               |   |  |

|             |           |             |             |             |             |
|-------------|-----------|-------------|-------------|-------------|-------------|
| SPATA3      | SPATA3    | 7.291747321 | 24.64941336 | 0           | 10.78836098 |
| DNER        | DNER      | 0           | 0.880336191 | 0           | 0           |
| LRFN1       | LRFN1     | 113.5429226 | 288.7502708 | 296.6059962 |             |
| 306.9779078 |           |             |             |             |             |
| PWP2        | PWP2      | 6858.409194 | 5341.88001  | 5302.110948 |             |
| 6963.39663  |           |             |             |             |             |
| SMIM11      | SMIM11    | 834.3842291 | 705.1492893 | 838.5252225 |             |
| 793.4349117 |           |             |             |             |             |
| YBEY        | YBEY      | 313.5451348 | 307.2373308 | 468.3252572 |             |
| 317.7662687 |           |             |             |             |             |
| ABCG8       | ABCG8     | 0           | 0           | 6.690360818 | 0           |
| PGLYRP2     | PGLYRP2   | 16.66685102 | 22.88874098 | 32.33674395 |             |
| 31.38432284 |           |             |             |             |             |
| ENKD1       | ENKD1     | 100.0011061 | 194.5542983 | 147.187938  |             |
| 113.7681703 |           |             |             |             |             |
| PLA2G6      | PLA2G6    | 252.0861217 | 598.6286102 | 268.7294928 |             |
| 483.5147237 |           |             |             |             |             |
| POM121L8P   | POM121L8P | 0           | 0.880336191 | 0           |             |
| 2.942280266 |           |             |             |             |             |
| HLA-L       | HLA-L     | 10.41678189 | 3.521344766 | 2.230120273 |             |
| 1.961520177 |           |             |             |             |             |
| METTL12     | METTL12   | 139.5848773 | 149.6571525 | 214.0915462 |             |
| 123.5757712 |           |             |             |             |             |
| LPCAT2      | LPCAT2    | 232.2942361 | 315.1603565 | 54.63794668 |             |
| 123.5757712 |           |             |             |             |             |
| CCL26       | CCL26     | 0           | 0.880336191 | 0           | 0           |
| AP2S1       | AP2S1     | 1715.643977 | 3046.843559 | 1106.139655 |             |
| 1229.873151 |           |             |             |             |             |
| TTC21B      | TTC21B    | 1648.976573 | 1640.946661 | 1583.385393 |             |
| 1556.466261 |           |             |             |             |             |
| EIF3J       | EIF3J     | 3570.872831 | 2474.625034 | 2714.056372 |             |
| 2593.129674 |           |             |             |             |             |
| WDR91       | WDR91     | 1087.512029 | 1218.385289 | 1177.503504 |             |
| 1249.488353 |           |             |             |             |             |
| TGFA        | TGFA      | 2.083356377 | 0           | 86.97469063 | 11.76912106 |
| DHX58       | DHX58     | 1796.894876 | 1181.411169 | 2309.289542 |             |
| 1385.814005 |           |             |             |             |             |
| AFAP1       | AFAP1     | 258.3361908 | 396.1512861 | 715.8686075 |             |
| 1168.085266 |           |             |             |             |             |
| MYLK4       | MYLK4     | 0           | 10.5640343  | 42.37228518 | 15.69216142 |
| SLC34A1     | SLC34A1   | 0           | 0.880336191 | 0           | 1.961520177 |
| TRMT1L      | TRMT1L    | 3285.453007 | 2820.597157 | 2799.916002 |             |
| 3036.433235 |           |             |             |             |             |
| LUZP6       | LUZP6     | 4079.211787 | 7482.857627 | 4470.276086 |             |
| 4402.632038 |           |             |             |             |             |
| DENND4A     | DENND4A   | 1985.438628 | 2623.40185  | 2915.882256 |             |
| 2693.167203 |           |             |             |             |             |
| NDUFA3      | NDUFA3    | 2394.818156 | 2878.699346 | 2613.700959 |             |
| 2114.518751 |           |             |             |             |             |
| ZACN        | ZACN      | 1004.177774 | 1223.667306 | 939.9956949 |             |



|                |                |             |             |             |
|----------------|----------------|-------------|-------------|-------------|
| 1102.37434     |                |             |             |             |
| MTURN          | MTURN          | 91.66768061 | 184.8706002 | 161.6837198 |
| 218.7094998    |                |             |             |             |
| ZNF555         | ZNF555         | 90.62600242 | 120.6060582 | 617.7433155 |
| 398.188596     |                |             |             |             |
| TAB3           | TAB3           | 1560.433927 | 2833.8022   | 1738.378752 |
| 1552.54322     |                |             |             |             |
| RABEP2         | RABEP2         | 401.0461026 | 546.6887749 | 278.7650341 |
| 329.5353898    |                |             |             |             |
| LRP5L          | LRP5L          | 85.41761147 | 145.2554716 | 113.7361339 |
| 107.8836098    |                |             |             |             |
| CPT1A          | CPT1A          | 1050.011614 | 1263.282435 | 844.1005232 |
| 727.7239858    |                |             |             |             |
| CCDC154        | CCDC154        | 0           | 16.72638764 | 6.690360818 |
|                |                |             |             | 4.903800443 |
| NPM2           | NPM2           | 7.291747321 | 10.5640343  | 21.18614259 |
| 10.78836098    |                |             |             |             |
| HIST2H3D       | HIST2H3D       |             | 14.58349464 | 20.2477324  |
| 39.02710477    |                | 23.53824213 |             |             |
| HMSD           | HMSD           | 73.9591514  | 113.5633687 | 118.1963744 |
| 124.5565313    |                |             |             |             |
| ARHGAP10       | ARHGAP10       |             | 1164.596215 | 1385.649165 |
| 337.8632213    |                | 658.0900195 |             |             |
| PANK3          | PANK3          | 1202.09663  | 1499.212534 | 1164.122782 |
| 971.9332479    |                |             |             |             |
| MCL1           | MCL1           | 14481.41018 | 26669.78492 | 17613.48991 |
| 21360.95473    |                |             |             |             |
| MSANTD3-TMEFF1 | MSANTD3-TMEFF1 |             | 261.4612254 | 263.2205212 |
| 228.5873279    |                | 245.1900222 |             |             |
| LRFN4          | LRFN4          | 296.8782838 | 638.2437388 | 239.7379293 |
| 361.9004727    |                |             |             |             |
| FUNDC2         | FUNDC2         | 4032.336268 | 3379.610639 | 4885.078457 |
| 4058.385247    |                |             |             |             |
| MRPL24         | MRPL24         | 2970.866194 | 2258.942667 | 2989.476225 |
| 3381.660786    |                |             |             |             |
| TIGD2          | TIGD2          | 213.5440287 | 141.7341268 | 246.4282901 |
| 169.6714953    |                |             |             |             |
| GAMT           | GAMT           | 663.5490062 | 800.225598  | 481.7059789 |
| 906.2223219    |                |             |             |             |
| EIF3F          | EIF3F          | 6457.363092 | 5889.449121 | 6921.178266 |
| 5984.598061    |                |             |             |             |
| EIF3B          | EIF3B          | 28469.0649  | 21267.16171 | 21047.87513 |
| 24589.61694    |                |             |             |             |
| YES1           | YES1           | 505.2139215 | 497.3899482 | 573.14091   |
| 768.9159095    |                |             |             |             |
| ZNF787         | ZNF787         | 71.87579502 | 211.2806859 | 82.51445008 |
| 56.88408514    |                |             |             |             |
| TIAL1          | TIAL1          | 708.3411683 | 1734.262297 | 796.1529373 |
| 709.0895441    |                |             |             |             |
| THRA           | THRA           | 86.45928966 | 164.6228678 | 403.6517693 |
| 223.6133002    |                |             |             |             |

|             |             |             |             |             |             |  |
|-------------|-------------|-------------|-------------|-------------|-------------|--|
| THBS2       | THBS2       | 0           | 3.521344766 | 28.99156354 | 0.980760089 |  |
| PANX3       | PANX3       | 0           | 0           | 1.115060136 | 0           |  |
| RBP7        | RBP7        | 2.083356377 | 0           | 0           | 0           |  |
| ACRC        | ACRC        | 44.79216211 | 75.70891246 | 52.4078264  |             |  |
| 54.92256497 |             |             |             |             |             |  |
| SFTPB       | SFTPB       | 3.125034566 | 0.880336191 | 0           | 6.865320621 |  |
| PLEKHA1     | PLEKHA1     | 223.9608106 | 161.101523  | 1961.39078  |             |  |
| 989.5869295 |             |             |             |             |             |  |
| SUMF1       | SUMF1       | 702.0910992 | 474.5012072 | 1235.486631 |             |  |
| 867.9726785 |             |             |             |             |             |  |
| SNORD38A    | SNORD38A    |             | 28.12531109 | 27.29042193 |             |  |
| 47.94758586 | 58.84560532 |             |             |             |             |  |
| ANXA2P3     | ANXA2P3     | 1.041678189 | 0.880336191 | 1.115060136 | 0           |  |
| TOP1P2      | TOP1P2      | 0           | 0.880336191 | 0           | 0           |  |
| TSPAN31     | TSPAN31     | 1586.475881 | 1375.085131 | 1803.05224  |             |  |
| 1679.061272 |             |             |             |             |             |  |
| SLC25A34    | SLC25A34    |             | 5.208390943 | 14.08537906 |             |  |
| 8.92048109  | 14.71140133 |             |             |             |             |  |
| SMARCA5     | SMARCA5     | 16914.77043 | 16056.4518  | 15243.98712 |             |  |
| 15497.97092 |             |             |             |             |             |  |
| APOL5       | APOL5       | 1.041678189 | 0           | 0           | 0           |  |
| KCNQ1DN     | KCNQ1DN     | 0           | 0           | 0.980760089 |             |  |
| EIF4ENIF1   | EIF4ENIF1   |             | 2581.278552 | 2383.07007  |             |  |
| 2278.067858 | 2468.573143 |             |             |             |             |  |
| BRD8        | BRD8        | 4705.260378 | 4220.331702 | 3693.079171 |             |  |
| 4107.423251 |             |             |             |             |             |  |
| KIAA1586    | KIAA1586    |             | 1112.512306 | 1166.445454 |             |  |
| 951.1462962 | 927.7990439 |             |             |             |             |  |
| SLC2A14     | SLC2A14     | 2.083356377 | 163.7425316 | 4.460240545 |             |  |
| 153.9793339 |             |             |             |             |             |  |
| SAT1        | SAT1        | 7978.213247 | 8070.041867 | 10955.46584 |             |  |
| 8571.843175 |             |             |             |             |             |  |
| LOC154761   | LOC154761   |             | 680.2158572 | 444.5697767 |             |  |
| 713.6384872 | 642.3978581 |             |             |             |             |  |
| CABP7       | CABP7       | 995.8443484 | 647.0471007 | 700.2577656 |             |  |
| 640.4363379 |             |             |             |             |             |  |
| RARRES1     | RARRES1     | 5.208390943 | 5.282017149 | 10.03554123 |             |  |
| 2.942280266 |             |             |             |             |             |  |
| NUDT9P1     | NUDT9P1     | 4.166712755 | 1.760672383 | 39.02710477 |             |  |
| 28.44204257 |             |             |             |             |             |  |
| SNORD42A    | SNORD42A    |             | 0           | 0.880336191 | 1.115060136 |  |
| 0.980760089 |             |             |             |             |             |  |
| SNORD42B    | SNORD42B    |             | 27.08363291 | 28.17075813 |             |  |
| 69.13372845 | 22.55748204 |             |             |             |             |  |
| PSMB6       | PSMB6       | 22712.75123 | 15974.58053 | 13659.48667 |             |  |
| 13785.56381 |             |             |             |             |             |  |
| RPL23A      | RPL23A      | 25017.98506 | 24057.82744 | 32159.44939 |             |  |
| 25355.59057 |             |             |             |             |             |  |
| R3HCC1      | R3HCC1      | 2426.068501 | 1806.449865 | 1816.432962 |             |  |
| 1895.809251 |             |             |             |             |             |  |

|              |              |             |   |             |             |             |
|--------------|--------------|-------------|---|-------------|-------------|-------------|
| CPA4         | CPA4         | 0           | 0 | 0           | 10.78836098 |             |
| SPATA20      | SPATA20      | 534.3809108 |   | 953.4040953 | 360.164424  |             |
| 1235.757712  |              |             |   |             |             |             |
| COL3A1       | COL3A1       | 33.33370204 |   | 0           | 2.230120273 | 0           |
| COL4A1       | COL4A1       | 1.041678189 |   | 0           | 0           | 1.961520177 |
| SNORD5       | SNORD5       | 18.7502074  |   | 7.923025723 |             | 10.03554123 |
| 18.63444168  |              |             |   |             |             |             |
| SNORA32      | SNORA32      | 14.58349464 |   | 17.60672383 |             | 28.99156354 |
| 18.63444168  |              |             |   |             |             |             |
| PTPRVP       | PTPRVP       | 21.87524196 |   | 5.282017149 | 0           | 8.826840798 |
| C1D          | C1D          | 1025.011338 |   | 2552.094619 |             | 955.6065368 |
| 1869.328729  |              |             |   |             |             |             |
| B3GAT2       | B3GAT2       | 155.2100501 |   | 67.78588674 |             | 186.2150428 |
| 116.7104506  |              |             |   |             |             |             |
| TREX2        | TREX2        | 35.41705842 |   | 44.01680957 |             | 27.87650341 |
| 48.05724434  |              |             |   |             |             |             |
| ZNF469       | ZNF469       | 13.54181645 |   | 30.8117667  |             | 3.345180409 |
| 21.57672195  |              |             |   |             |             |             |
| PARK7        | PARK7        | 26943.00635 |   | 20174.6645  |             | 17856.57302 |
| 22697.73073  |              |             |   |             |             |             |
| FAM201A      | FAM201A      | 1.041678189 |   | 7.923025723 |             | 4.460240545 |
| 55.90332505  |              |             |   |             |             |             |
| SLC40A1      | SLC40A1      | 383.3375734 |   | 363.5788471 |             | 2659.418425 |
| 1527.043458  |              |             |   |             |             |             |
| ZBTB46       | ZBTB46       | 21.87524196 |   | 87.15328295 |             | 14.49578177 |
| 33.34584301  |              |             |   |             |             |             |
| CFP          | CFP          | 94.79271517 |   | 87.15328295 |             | 54.63794668 |
| 42.17268381  |              |             |   |             |             |             |
| ZNF44        | ZNF44        | 913.5517715 |   | 589.8252483 |             | 2207.81907  |
| 1346.583602  |              |             |   |             |             |             |
| NHSL1        | NHSL1        | 5.208390943 |   | 25.52974955 |             | 35.68192436 |
| 3.923040355  |              |             |   |             |             |             |
| NINJ1        | NINJ1        | 7984.463316 |   | 7655.403521 |             | 5873.021738 |
| 6849.628459  |              |             |   |             |             |             |
| HTT-AS       | HTT-AS       | 2.083356377 |   | 0           | 4.460240545 | 0.980760089 |
| LOC100289495 | LOC100289495 |             |   | 8.33342551  |             | 16.72638764 |
| 12.2656615   | 12.74988115  |             |   |             |             |             |
| MIR550B2     | MIR550B2     |             |   | 0           | 0.880336191 | 0           |
| 0.980760089  |              |             |   |             |             |             |
| MIR3654      | MIR3654      | 5768.813809 |   | 4324.211372 |             | 5984.527751 |
| 5446.160772  |              |             |   |             |             |             |
| KLRC4-KLRK1  | KLRC4-KLRK1  |             |   | 192.7104649 |             | 14.96571525 |
| 1833.158864  | 66.69168603  |             |   |             |             |             |
| CBX7         | CBX7         | 204.168925  |   | 494.7489396 |             | 1546.588409 |
| 1315.199279  |              |             |   |             |             |             |
| LRP11        | LRP11        | 284.3781455 |   | 275.5452279 |             | 560.8752485 |
| 473.7071228  |              |             |   |             |             |             |
| ORAI2        | ORAI2        | 7129.245523 |   | 5989.807447 |             | 4716.704376 |
| 5098.971701  |              |             |   |             |             |             |
| IL9          | IL9          | 5.208390943 |   | 2.641008574 |             | 3093.176818 |

|                 |              |             |             |  |
|-----------------|--------------|-------------|-------------|--|
| 209.882659      |              |             |             |  |
| MCM6 MCM6       | 22672.12578  | 21297.97348 | 15589.65577 |  |
| 22762.4609      |              |             |             |  |
| RPL7 RPL7       | 32298.27392  | 23416.06236 | 35185.7226  |  |
| 30830.19339     |              |             |             |  |
| LIFR LIFR       | 5.208390943  | 6.16235334  | 20.07108245 |  |
| 2.942280266     |              |             |             |  |
| PRDM1 PRDM1     | 12847.0171   | 13086.19749 | 4970.938087 |  |
| 6574.034874     |              |             |             |  |
| SLC25A35        | SLC25A35     | 4166.712755 | 3389.294337 |  |
| 2468.743142     | 3008.971952  |             |             |  |
| LOC102724927    | LOC102724927 | 2.083356377 | 0.880336191 |  |
| 3.345180409     | 2.942280266  |             |             |  |
| SSRP1 SSRP1     | 3667.748902  | 6770.665648 | 3680.81351  |  |
| 3287.507817     |              |             |             |  |
| SSR2 SSR2       | 10813.66128  | 9073.625125 | 7115.19873  |  |
| 6537.746751     |              |             |             |  |
| LOC101927211    | LOC101927211 | 2.083356377 | 6.16235334  |  |
| 1.115060136     | 5.884560532  |             |             |  |
| TRIM59 TRIM59   | 1989.60534   | 2560.897981 | 1631.332979 |  |
| 1182.796667     |              |             |             |  |
| LOC100129917    | LOC100129917 | 245.8360525 | 344.2114509 |  |
| 584.2915114     | 465.8610421  |             |             |  |
| TXNDC8 TXNDC8   | 1.041678189  | 0 0         | 0           |  |
| MIR1282 MIR1282 | 10225.1131   | 11123.04778 | 8158.895017 |  |
| 9228.952434     |              |             |             |  |
| IRF5 IRF5       | 2093.773159  | 1405.016562 | 1466.304079 |  |
| 2016.442742     |              |             |             |  |
| ZFP28 ZFP28     | 81.25089872  | 47.53815434 | 732.5945095 |  |
| 180.4598563     |              |             |             |  |
| LOC101927905    | LOC101927905 | 14.58349464 | 13.20504287 |  |
| 33.45180409     | 18.63444168  |             |             |  |
| EN03 EN03       | 127.084739   | 180.4689192 | 82.51445008 |  |
| 208.9018989     |              |             |             |  |
| ZCCHC4 ZCCHC4   | 1469.807924  | 1258.000418 | 1113.945076 |  |
| 1300.487878     |              |             |             |  |
| PITPNM3 PITPNM3 | 6.250069132  | 8.803361914 | 17.84096218 |  |
| 11.76912106     |              |             |             |  |
| MZT2B MZT2B     | 3775.041756  | 4108.529005 | 2459.822661 |  |
| 3112.932521     |              |             |             |  |
| ERICH6 ERICH6   | 17.70852921  | 15.84605145 | 40.14216491 |  |
| 15.69216142     |              |             |             |  |
| UBE2NL UBE2NL   | 1.041678189  | 1.760672383 | 0 0         |  |
| PRMT5-AS1       | PRMT5-AS1    | 5716.7299   | 3115.509782 |  |
| 5316.60673      | 4649.78358   |             |             |  |
| SNORD109A       | SNORD109A    | 1.041678189 | 2.641008574 |  |
| 1.115060136     | 0.980760089  |             |             |  |
| SNORD64 SNORD64 | 2.083356377  | 1.760672383 | 16.72590204 |  |
| 0.980760089     |              |             |             |  |
| APOC2 APOC2     | 2.083356377  | 0 0         | 0           |  |

|             |          |             |             |             |             |
|-------------|----------|-------------|-------------|-------------|-------------|
| OPN3        | OPN3     | 1369.806818 | 1496.571525 | 1054.846889 |             |
| 1182.796667 |          |             |             |             |             |
| WDR37       | WDR37    | 2065.647848 | 1928.816595 | 2065.091372 |             |
| 1824.213765 |          |             |             |             |             |
| MMP25       | MMP25    | 483.3386796 | 779.9778656 | 260.9240719 |             |
| 284.4204257 |          |             |             |             |             |
| KIAA1328    | KIAA1328 |             | 220.835776  | 161.9818592 |             |
| 178.4096218 |          | 179.4790962 |             |             |             |
| KCTD16      | KCTD16   | 0           | 6.16235334  | 0           | 10.78836098 |
| NTN3        | NTN3     | 0           | 4.401680957 | 4.460240545 | 0           |
| NRL         | NRL      | 73.9591514  | 79.23025723 | 103.7005927 |             |
| 89.24916807 |          |             |             |             |             |
| VTI1B       | VTI1B    | 4828.178405 | 3966.794879 | 4404.487538 |             |
| 4196.672419 |          |             |             |             |             |
| DPH7        | DPH7     | 2363.56781  | 1767.715072 | 1867.725728 |             |
| 2247.902123 |          |             |             |             |             |
| ALKBH8      | ALKBH8   | 1225.01355  | 884.7378724 | 1363.718547 |             |
| 1082.759138 |          |             |             |             |             |
| PPAP2C      | PPAP2C   | 13.54181645 | 25.52974955 | 12.2656615  |             |
| 16.67292151 |          |             |             |             |             |
| OTX1        | OTX1     | 4.166712755 | 22.00840479 | 3.345180409 | 0           |
| CREBRF      | CREBRF   | 873.9680003 | 579.261214  | 7038.25958  |             |
| 3243.373613 |          |             |             |             |             |
| COG7        | COG7     | 1804.186623 | 1405.016562 | 1235.486631 |             |
| 1611.388826 |          |             |             |             |             |
| AKAP7       | AKAP7    | 206.2522814 | 272.9042193 | 279.8800942 |             |
| 409.9577171 |          |             |             |             |             |
| MTMR4       | MTMR4    | 5100.056412 | 6298.80545  | 4479.196567 |             |
| 6638.76504  |          |             |             |             |             |
| MTMR6       | MTMR6    | 7224.038239 | 6001.251817 | 4731.200158 |             |
| 4595.841775 |          |             |             |             |             |
| CEL         | CEL      | 10.41678189 | 17.60672383 | 12.2656615  |             |
| 14.71140133 |          |             |             |             |             |
| ONECUT2     | ONECUT2  | 1.041678189 | 14.96571525 | 1.115060136 |             |
| 12.74988115 |          |             |             |             |             |
| POU2F1      | POU2F1   | 884.3847822 | 781.738538  | 1155.202301 |             |
| 959.1833667 |          |             |             |             |             |
| NFYB        | NFYB     | 3161.493303 | 2895.425734 | 3171.231028 |             |
| 2909.915183 |          |             |             |             |             |
| PPL         | PPL      | 7.291747321 | 29.93143051 | 42.37228518 |             |
| 36.28812328 |          |             |             |             |             |
| CGN         | CGN      | 44.79216211 | 51.0594991  | 97.01023186 |             |
| 105.9220896 |          |             |             |             |             |
| BLOC1S4     | BLOC1S4  | 2210.441116 | 1779.159443 | 2160.986544 |             |
| 2470.534663 |          |             |             |             |             |
| IGLON5      | IGLON5   | 0           | 1.760672383 | 0           |             |
| C17orf51    | C17orf51 |             | 703.1327774 | 669.0555055 |             |
| 682.4168034 |          | 555.1102102 |             |             |             |
| XKRX        | XKRX     | 10.41678189 | 20.2477324  | 0           | 20.59596186 |
| BOLA3       | BOLA3    | 2678.154623 | 2218.447202 | 2013.798606 |             |

|             |          |             |             |             |
|-------------|----------|-------------|-------------|-------------|
| 1812.444644 |          |             |             |             |
| BLOC1S3     | BLOC1S3  | 631.2569824 | 605.6712997 | 904.3137705 |
| 617.8788559 |          |             |             |             |
| SLC36A4     | SLC36A4  | 1405.223877 | 1416.460932 | 1435.082395 |
| 1406.409967 |          |             |             |             |
| CPA6        | CPA6     | 2.083356377 | 16.72638764 | 22.30120273 |
| 9.807600887 |          |             |             |             |
| SYNE2       | SYNE2    | 5970.899378 | 3673.642927 | 12179.80187 |
| 6456.343664 |          |             |             |             |
| GPRIN3      | GPRIN3   | 5227.141151 | 9027.847643 | 1818.663082 |
| 3448.352472 |          |             |             |             |
| TMEM17      | TMEM17   | 22.91692015 | 44.01680957 | 7.805420954 |
| 21.57672195 |          |             |             |             |
| PON3        | PON3     | 5.208390943 | 0.880336191 | 6.690360818 |
| 3.923040355 |          |             |             |             |
| TMEM143     | TMEM143  | 656.2572589 | 800.225598  | 719.2137879 |
| 764.9928692 |          |             |             |             |
| RSC1A1      | RSC1A1   | 1142.720973 | 943.7203972 | 990.173401  |
| 852.2805171 |          |             |             |             |
| METTL16     | METTL16  | 2079.189665 | 1868.953734 | 2602.550358 |
| 2423.458179 |          |             |             |             |
| ASPSCR1     | ASPSCR1  | 1356.265002 | 945.4810696 | 1257.787834 |
| 1118.066501 |          |             |             |             |
| NCAPD2      | NCAPD2   | 16026.21893 | 20421.15863 | 9852.671364 |
| 14202.38684 |          |             |             |             |
| LPPR4       | LPPR4    | 0           | 0           | 0.980760089 |
| PKD2        | PKD2     | 1485.433097 | 853.9261057 | 786.1173961 |
| 667.8976204 |          |             |             |             |
| MIR423      | MIR423   | 4.166712755 | 3.521344766 | 10.03554123 |
| 6.865320621 |          |             |             |             |
| MIR128-1    | MIR128-1 |             | 0           | 0.880336191 |
| 2.942280266 |          |             |             | 0           |
| HCST        | HCST     | 2835.44803  | 3618.181747 | 1731.688392 |
| 2484.265305 |          |             |             |             |
| PHTF1       | PHTF1    | 2894.823686 | 2083.755765 | 1536.552868 |
| 1648.657709 |          |             |             |             |
| KLF1        | KLF1     | 15.62517283 | 27.29042193 | 14.49578177 |
| 20.59596186 |          |             |             |             |
| ADORA2B     | ADORA2B  | 28.12531109 | 79.23025723 | 188.445163  |
| 195.1712576 |          |             |             |             |
| CA12        | CA12     | 0           | 33.45277527 | 0           |
| NBPF3       | NBPF3    | 311.4617784 | 256.1778317 | 8.826840798 |
| 381.5156745 |          |             |             | 392.501168  |
| GPBP1       | GPBP1    | 8611.553586 | 7077.902979 | 13763.18726 |
| 9180.89519  |          |             |             |             |
| NDUFB10     | NDUFB10  | 5447.976927 | 5669.365073 | 4022.021912 |
| 4734.128948 |          |             |             |             |
| NDUFB2      | NDUFB2   | 5600.061942 | 5418.469258 | 4450.205004 |
| 4194.710899 |          |             |             |             |
| TMEM167A    | TMEM167A |             | 7977.171569 | 7508.387377 |

|                 |              |             |               |     |
|-----------------|--------------|-------------|---------------|-----|
| 6078.192803     | 5563.851983  |             |               |     |
| LYG1 LYG1       | 32.29202385  | 21.12806859 | 17.84096218   |     |
| 28.44204257     |              |             |               |     |
| PCP2 PCP2       | 185.4187176  | 162.8621954 | 177.2945617   |     |
| 159.8638945     |              |             |               |     |
| SLC16A10        | SLC16A10     | 312.5034566 | 181.3492554   |     |
| 372.4300855     | 327.5738696  |             |               |     |
| ACBD7 ACBD7     | 47.91719668  | 106.5206792 | 93.66505145   |     |
| 37.26888337     |              |             |               |     |
| PLA2G4B PLA2G4B | 86.45928966  | 235.9300993 | 205.1710651   |     |
| 361.9004727     |              |             |               |     |
| ARID5A ARID5A   | 18418.95373  | 15345.14015 | 16637.81229   |     |
| 27566.22381     |              |             |               |     |
| ZNF765 ZNF765   | 1025.011338  | 1179.650497 | 1522.057086   |     |
| 1637.869348     |              |             |               |     |
| ZFP92 ZFP92     | 5.208390943  | 14.08537906 | 7.805420954   |     |
| 3.923040355     |              |             |               |     |
| VMA21 VMA21     | 5551.103068  | 5560.203385 | 5380.165157   |     |
| 5446.160772     |              |             |               |     |
| CDNF CDNF       | 20.83356377  | 19.36739621 | 14.49578177   |     |
| 20.59596186     |              |             |               |     |
| HLA-H HLA-H     | 48.95887487  | 215.6823669 | 137.1523968   |     |
| 279.5166253     |              |             |               |     |
| SUM03 SUM03     | 5394.851339  | 6790.913381 | 5416.962142   |     |
| 4987.165051     |              |             |               |     |
| NIP7 NIP7       | 4442.757475  | 3261.645589 | 4338.69899    |     |
| 3856.348669     |              |             |               |     |
| SHISA3 SHISA3   | 30.20866747  | 19.36739621 | 4.460240545   |     |
| 17.6536816      |              |             |               |     |
| RBM44 RBM44     | 23.95859834  | 4.401680957 | 13.38072164   |     |
| 12.74988115     |              |             |               |     |
| C16orf90        | C16orf90     | 0           | 0.880336191   | 0 0 |
| TMEM223 TMEM223 | 1228.138584  | 1350.435718 | 1062.65231    |     |
| 1051.374815     |              |             |               |     |
| SMIM15 SMIM15   | 5737.563463  | 4090.922282 | 4507.073071   |     |
| 4208.44154      |              |             |               |     |
| RELL1 RELL1     | 886.4681386  | 1276.487478 | 733.7095697   |     |
| 656.1284993     |              |             |               |     |
| SLC8A1 SLC8A1   | 14.58349464  | 70.42689532 | 0 36.28812328 |     |
| NUDT7 NUDT7     | 220.835776   | 256.1778317 | 233.0475685   |     |
| 318.7470288     |              |             |               |     |
| NSDHL NSDHL     | 2418.776754  | 1677.040445 | 1706.042008   |     |
| 1743.791438     |              |             |               |     |
| PACRGL PACRGL   | 186.4603958  | 229.767746  | 244.1981698   |     |
| 291.2857463     |              |             |               |     |
| DLC1 DLC1       | 16.66685102  | 43.13647338 | 79.16926967   |     |
| 81.40308736     |              |             |               |     |
| FRAT1 FRAT1     | 132.29313    | 329.2457356 | 223.0120273   |     |
| 273.6320647     |              |             |               |     |
| LOC101927559    | LOC101927559 | 276.04472   | 459.5354919   |     |

|                 |               |               |               |   |
|-----------------|---------------|---------------|---------------|---|
| 514.0427228     | 458.0149614   |               |               |   |
| WIPF2 WIPF2     | 889.5931731   | 1379.486812   | 1261.133014   |   |
| 1068.047737     |               |               |               |   |
| ELL3 ELL3       | 91.66768061   | 118.8453858   | 389.1559876   |   |
| 234.4016612     |               |               |               |   |
| MYH8 MYH8       | 12.50013826   | 0.880336191   | 0 0           |   |
| NAPSA NAPSA     | 607.298384    | 544.0477663   | 996.8637618   |   |
| 1629.042507     |               |               |               |   |
| TRABD2B TRABD2B | 0 0           | 0 1.961520177 |               |   |
| YAE1D1 YAE1D1   | 345.8371586   | 332.7670804   | 459.4047761   |   |
| 444.2843202     |               |               |               |   |
| NIT2 NIT2       | 4003.169279   | 2957.929603   | 3141.124404   |   |
| 3153.143685     |               |               |               |   |
| LHX9 LHX9       | 11.45846008   | 0 13.38072164 | 0             |   |
| PRKX PRKX       | 6070.900484   | 3121.672135   | 4962.017606   |   |
| 2596.071955     |               |               |               |   |
| KIF24 KIF24     | 1016.677912   | 1394.452527   | 760.4710129   |   |
| 923.8760035     |               |               |               |   |
| ESPNL ESPNL     | 5.208390943   | 1.760672383   | 0 0           |   |
| RRP36 RRP36     | 4686.510171   | 3743.189486   | 3421.004498   |   |
| 3042.317795     |               |               |               |   |
| C21orf59        | C21orf59      | 4324.006161   | 3009.869439   |   |
| 3396.473175     | 3000.145111   |               |               |   |
| CNP CNP         | 11239.70766   | 9430.161283   | 8733.150987   |   |
| 7735.254819     |               |               |               |   |
| ZIC5 ZIC5       | 0 0           | 0 0.980760089 |               |   |
| ZNF462 ZNF462   | 0 5.282017149 | 10.03554123   | 3.923040355   |   |
| ANXA2P1 ANXA2P1 | 2.083356377   | 1.760672383   | 0 0.980760089 |   |
| CYP4F22 CYP4F22 | 16.66685102   | 40.49546481   | 10.03554123   |   |
| 40.21116364     |               |               |               |   |
| LPCAT3 LPCAT3   | 3212.535534   | 3773.120917   | 2740.817815   |   |
| 3638.619929     |               |               |               |   |
| FLJ42393        | FLJ42393      | 11.45846008   | 18.48706002   | 0 |
| 17.6536816      |               |               |               |   |
| LOC286359       | LOC286359     | 0 0           | 0 1.961520177 |   |
| FLJ37201        | FLJ37201      | 4.166712755   | 10.5640343    | 0 |
| 19.61520177     |               |               |               |   |
| ZBTB11-AS1      | ZBTB11-AS1    | 378.1291825   | 427.843389    |   |
| 505.1222417     | 560.0140106   |               |               |   |
| TUBGCP4 TUBGCP4 | 3363.578871   | 2821.477494   | 2593.629877   |   |
| 3341.449622     |               |               |               |   |
| RPPH1 RPPH1     | 23.95859834   | 69.54655912   | 25.64638313   |   |
| 14.71140133     |               |               |               |   |
| SNORD12 SNORD12 | 6.250069132   | 2.641008574   | 2.230120273   |   |
| 13.73064124     |               |               |               |   |
| MSX2P1 MSX2P1   | 47.91719668   | 84.51227438   | 36.7969845    |   |
| 80.42232727     |               |               |               |   |
| SLC7A5P2        | SLC7A5P2      | 609.3817404   | 707.7902979   |   |
| 982.36798       | 925.8375237   |               |               |   |
| RPL23AP32       | RPL23AP32     | 1.041678189   | 0 0 0         |   |



|             |             |             |               |               |
|-------------|-------------|-------------|---------------|---------------|
| SIRPG       | SIRPG       | 8448.01011  | 7090.227686   | 4111.226722   |
| 5606.024667 |             |             |               |               |
| TEX40       | TEX40       | 2.083356377 | 9.683698106   | 0 9.807600887 |
| CABP4       | CABP4       | 4.166712755 | 22.00840479   | 7.805420954   |
| 2.942280266 |             |             |               |               |
| ZNRF2P2     | ZNRF2P2     | 1.041678189 | 7.923025723   | 3.345180409   |
| 7.846080709 |             |             |               |               |
| IL17RD      | IL17RD      | 0 0         | 0 4.903800443 |               |
| HYDIN       | HYDIN       | 0 0         | 5.575300681   | 0             |
| IN080       | IN080       | 970.8440719 | 1962.269371   | 1586.730574   |
| 1227.911631 |             |             |               |               |
| NUP54       | NUP54       | 4550.050328 | 4310.125993   | 3925.01168    |
| 4055.442967 |             |             |               |               |
| TBK1        | TBK1        | 7170.912651 | 5620.946582   | 4772.457383   |
| 4821.416596 |             |             |               |               |
| IMMP2L      | IMMP2L      | 171.8769011 | 182.2295916   | 443.7939342   |
| 360.9197126 |             |             |               |               |
| SIDT1       | SIDT1       | 1296.889345 | 1296.73521    | 1905.637773   |
| 1325.00688  |             |             |               |               |
| MAF         | MAF         | 518.755738  | 802.8666066   | 361.2794842   |
| 511.9567663 |             |             |               |               |
| TBL2        | TBL2        | 3696.915892 | 2534.487895   | 2583.594336   |
| 3131.566963 |             |             |               |               |
| TMEM181     | TMEM181     | 1175.012997 | 1473.682784   | 962.2968976   |
| 1370.121844 |             |             |               |               |
| CARD10      | CARD10      | 0 0         | 33.45180409   | 1.961520177   |
| CENPQ       | CENPQ       | 1583.350847 | 1025.591663   | 876.4372671   |
| 727.7239858 |             |             |               |               |
| CEP55       | CEP55       | 9926.15146  | 8424.817352   | 3344.065349   |
| 5100.933221 |             |             |               |               |
| SHQ1        | SHQ1        | 3414.621103 | 2782.742701   | 3474.527385   |
| 3358.122544 |             |             |               |               |
| TSR1        | TSR1        | 13206.39608 | 8761.986113   | 13398.5626    |
| 13233.39588 |             |             |               |               |
| PTCHD1      | PTCHD1      | 0 0         | 0 1.961520177 |               |
| PIH1D3      | PIH1D3      | 0 0         | 0 4.903800443 |               |
| C1orf122    | C1orf122    |             | 2652.112668   | 2073.191731   |
| 2010.453426 | 2165.518276 |             |               |               |
| RNF138P1    | RNF138P1    |             | 26.04195472   | 15.84605145   |
| 72.47890886 | 11.76912106 |             |               |               |
| AK7         | AK7         | 7.291747321 | 18.48706002   | 4.460240545   |
| 31.38432284 |             |             |               |               |
| LYPD5       | LYPD5       | 9.375103698 | 14.08537906   | 52.4078264    |
| 64.73016585 |             |             |               |               |
| MTFR1       | MTFR1       | 305.2117093 | 488.5865862   | 316.6770787   |
| 244.2092621 |             |             |               |               |
| ZNF577      | ZNF577      | 89.58432423 | 103.8796706   | 322.2523794   |
| 269.7090244 |             |             |               |               |
| VPS72       | VPS72       | 4092.753603 | 3245.799538   | 2981.670804   |
| 3304.180739 |             |             |               |               |

|              |              |               |     |               |               |
|--------------|--------------|---------------|-----|---------------|---------------|
| SLC6A11      | SLC6A11      | 0             | 0   | 1.115060136   | 0             |
| HELZ2        | HELZ2        | 350.0038714   |     | 403.1939757   | 854.1360644   |
| 263.8244639  |              |               |     |               |               |
| C22orf34     | C22orf34     |               |     | 293.7532492   | 286.1092622   |
| 312.2168382  | 269.7090244  |               |     |               |               |
| ELFN2        | ELFN2        | 1.041678189   |     | 3.521344766   | 0 0.980760089 |
| LOC100506272 | LOC100506272 |               | 0 0 | 0 0           | 2.942280266   |
| LOC646214    | LOC646214    |               |     | 1.041678189   | 15.84605145   |
| 2.230120273  | 20.59596186  |               |     |               |               |
| THAP7-AS1    | THAP7-AS1    |               |     | 186.4603958   | 161.101523    |
| 301.0662368  | 267.7475042  |               |     |               |               |
| LINC00324    | LINC00324    |               |     | 400.0044245   | 393.5102776   |
| 298.8361165  | 395.2463157  |               |     |               |               |
| LINC00277    | LINC00277    |               | 0 0 | 0 0           | 0.980760089   |
| IQCB1        | IQCB1        | 2376.067948   |     | 1949.064328   | 2719.631672   |
| 2485.246065  |              |               |     |               |               |
| GRK6         | GRK6         | 13962.65444   |     | 12137.19507   | 7909.121547   |
| 8954.33961   |              |               |     |               |               |
| AEBP2        | AEBP2        | 1422.932406   |     | 1533.545645   | 1688.201046   |
| 1107.27814   |              |               |     |               |               |
| MAOB         | MAOB         | 1.041678189   |     | 3.521344766   | 0 7.846080709 |
| RNASE6       | RNASE6       | 31.25034566   |     | 154.9391697   | 27.87650341   |
| 28.44204257  |              |               |     |               |               |
| GFRA2        | GFRA2        | 2.083356377   |     | 8.803361914   | 23.41626286   |
| 2.942280266  |              |               |     |               |               |
| OR8S1        | OR8S1        | 0 0           |     | 0 1.961520177 |               |
| OR7D4        | OR7D4        | 0 0           |     | 0 2.942280266 |               |
| C2orf78      | C2orf78      | 1.041678189   |     | 0 0 0         |               |
| AHDC1        | AHDC1        | 41.66712755   |     | 139.9734544   | 52.4078264    |
| 50.01876452  |              |               |     |               |               |
| SNAI3        | SNAI3        | 229.1692015   |     | 402.3136395   | 175.0644414   |
| 280.4973854  |              |               |     |               |               |
| FGF8         | FGF8         | 1.041678189   |     | 1.760672383   | 0 0           |
| THAP8        | THAP8        | 344.7954805   |     | 213.0413583   | 420.3776714   |
| 263.8244639  |              |               |     |               |               |
| GGN          | GGN          | 0 5.282017149 |     | 12.2656615    | 5.884560532   |
| HLA-DPA1     | HLA-DPA1     |               |     | 241.6693398   | 129.4094201   |
| 120.4264947  | 62.76864567  |               |     |               |               |
| H3F3AP4      | H3F3AP4      | 16808.51925   |     | 22024.25084   | 12292.42294   |
| 12717.51607  |              |               |     |               |               |
| AFG3L1P      | AFG3L1P      | 1107.303915   |     | 1055.523094   | 1267.823375   |
| 1318.141559  |              |               |     |               |               |
| DUSP5P1      | DUSP5P1      | 0 5.282017149 |     | 0 0           | 0.980760089   |
| ERCC4        | ERCC4        | 538.5476236   |     | 677.8588674   | 545.2644066   |
| 657.1092594  |              |               |     |               |               |
| MAN2C1       | MAN2C1       | 1522.933512   |     | 1533.545645   | 1121.750497   |
| 1891.886211  |              |               |     |               |               |
| NPR1         | NPR1         | 0 0           |     | 0 23.53824213 |               |
| CPA2         | CPA2         | 1.041678189   |     | 0.880336191   | 3.345180409   |
| 3.923040355  |              |               |     |               |               |

|                 |                 |             |             |             |             |
|-----------------|-----------------|-------------|-------------|-------------|-------------|
| LPL             | LPL             | 4.166712755 | 18.48706002 | 0           | 8.826840798 |
| GALT            | GALT            | 2562.528344 | 1695.527505 | 1850.999826 |             |
| 2436.20806      |                 |             |             |             |             |
| RRP12           | RRP12           | 5229.224507 | 2960.570612 | 4240.573698 |             |
| 4961.665289     |                 |             |             |             |             |
| FKBP8           | FKBP8           | 3070.8673   | 7061.176592 | 3152.275005 |             |
| 3693.542494     |                 |             |             |             |             |
| PDE4A           | PDE4A           | 992.7193138 | 1612.775903 | 586.5216317 |             |
| 791.4733916     |                 |             |             |             |             |
| SPECC1L-ADORA2A | SPECC1L-ADORA2A | 3840.667482 | 4618.24366  |             |             |
| 3652.937006     | 5078.375739     |             |             |             |             |
| LINC01138       | LINC01138       | 33.33370204 | 37.85445623 |             |             |
| 118.1963744     | 110.82589       |             |             |             |             |
| SOD2            | SOD2            | 2689.613083 | 3084.698015 | 4297.441765 |             |
| 3238.469813     |                 |             |             |             |             |
| RGAG4           | RGAG4           | 0           | 7.923025723 | 18.95602232 | 26.48052239 |
| ORM2            | ORM2            | 5.208390943 | 5.282017149 | 0           | 0.980760089 |
| TGIF2-C20orf24  | TGIF2-C20orf24  | 15408.50377 | 9593.903814 |             |             |
| 10596.41647     | 8371.768117     |             |             |             |             |
| SV0PL           | SV0PL           | 3.125034566 | 8.803361914 | 0           | 0           |
| SNORD97         | SNORD97         | 5.208390943 | 0.880336191 | 10.03554123 |             |
| 4.903800443     |                 |             |             |             |             |
| PTP4A2          | PTP4A2          | 32835.77986 | 36553.31934 | 22206.42261 |             |
| 29325.70741     |                 |             |             |             |             |
| CCDC155         | CCDC155         | 1.041678189 | 2.641008574 | 1.115060136 |             |
| 7.846080709     |                 |             |             |             |             |
| TCEAL2          | TCEAL2          | 0           | 0           | 68.01866831 | 4.903800443 |
| TUBA3D          | TUBA3D          | 32.29202385 | 18.48706002 | 25.64638313 |             |
| 21.57672195     |                 |             |             |             |             |
| DHRS13          | DHRS13          | 1471.891281 | 1001.822586 | 1409.436012 |             |
| 1480.947734     |                 |             |             |             |             |
| SLFN13          | SLFN13          | 627.0902696 | 1655.03204  | 676.8415027 |             |
| 966.0486873     |                 |             |             |             |             |
| SFXN5           | SFXN5           | 577.0897165 | 594.2269292 | 374.6602058 |             |
| 330.5161499     |                 |             |             |             |             |
| ZNF579          | ZNF579          | 6.250069132 | 36.97412004 | 17.84096218 |             |
| 9.807600887     |                 |             |             |             |             |
| LOC100289561    | LOC100289561    | 340.6287677 | 347.7327956 |             |             |
| 370.1999652     | 411.9192372     |             |             |             |             |
| MIR6841         | MIR6841         | 0           | 0           | 0.980760089 |             |
| UBE4A           | UBE4A           | 7486.541142 | 8400.167939 | 7977.140215 |             |
| 7278.220618     |                 |             |             |             |             |
| TNFSF10         | TNFSF10         | 8059.464146 | 6153.549978 | 9926.265333 |             |
| 3976.001399     |                 |             |             |             |             |
| MIR4493         | MIR4493         | 0           | 0.880336191 | 0           | 0           |
| MIR4491         | MIR4491         | 0           | 1.760672383 | 0           | 0           |
| SEPHS1          | SEPHS1          | 7032.369452 | 5951.072654 | 3899.365297 |             |
| 4567.399733     |                 |             |             |             |             |
| RFX1            | RFX1            | 28.12531109 | 117.9650497 | 31.22168382 |             |
| 50.99952461     |                 |             |             |             |             |

|             |          |               |             |               |
|-------------|----------|---------------|-------------|---------------|
| ZMYM6       | ZMYM6    | 1622.934618   | 1226.308315 | 1990.382343   |
| 1645.715429 |          |               |             |               |
| SLC16A2     | SLC16A2  | 4.166712755   | 28.17075813 | 26.76144327   |
| 68.65320621 |          |               |             |               |
| IGFBP6      | IGFBP6   | 22.91692015   | 7.923025723 | 20.07108245   |
| 30.40356275 |          |               |             |               |
| IFNW1       | IFNW1    | 4.166712755   | 6.16235334  | 0 4.903800443 |
| TMEM159     | TMEM159  | 595.8399239   | 433.1254062 | 539.689106    |
| 584.5330128 |          |               |             |               |
| CHMP1B      | CHMP1B   | 2489.610871   | 2669.179332 | 3503.518948   |
| 3186.489528 |          |               |             |               |
| SPATC1L     | SPATC1L  | 119.7929917   | 108.2813515 | 147.187938    |
| 126.5180514 |          |               |             |               |
| ARL8A       | ARL8A    | 417.7129537   | 910.2676219 | 452.7144153   |
| 407.0154368 |          |               |             |               |
| FAM174A     | FAM174A  | 492.7137833   | 369.7412004 | 410.3421301   |
| 454.0919211 |          |               |             |               |
| ARID2       | ARID2    | 2220.857898   | 3788.086632 | 2838.943107   |
| 2317.53609  |          |               |             |               |
| TSPAN32     | TSPAN32  | 251.0444435   | 146.1358078 | 149.4180583   |
| 96.11448869 |          |               |             |               |
| PHLDA3      | PHLDA3   | 2067.731205   | 633.8420578 | 1342.532404   |
| 421.7268381 |          |               |             |               |
| PEF1        | PEF1     | 7401.123531   | 4874.421492 | 6478.499392   |
| 6374.940576 |          |               |             |               |
| TMEM41B     | TMEM41B  | 1635.434756   | 1960.508698 | 2311.519662   |
| 1718.291675 |          |               |             |               |
| SELL        | SELL     | 45889.04925   | 92334.94178 | 47853.92081   |
| 63616.02239 |          |               |             |               |
| NPFF        | NPFF     | 26.04195472   | 21.12806859 | 27.87650341   |
| 12.74988115 |          |               |             |               |
| RDH16       | RDH16    | 15.62517283   | 10.5640343  | 20.07108245   |
| 13.73064124 |          |               |             |               |
| CENPK       | CENPK    | 3235.452454   | 4325.091709 | 1590.075754   |
| 3412.064348 |          |               |             |               |
| LYRM2       | LYRM2    | 2333.359143   | 1887.440794 | 2586.939516   |
| 2033.115664 |          |               |             |               |
| MIR937      | MIR937   | 13.54181645   | 47.53815434 | 22.30120273   |
| 26.48052239 |          |               |             |               |
| C11orf54    | C11orf54 |               | 1558.35057  | 1247.436383   |
| 1488.605282 |          | 1266.161274   |             |               |
| SCML4       | SCML4    | 81.25089872   | 73.06790389 | 1290.124578   |
| 897.3954811 |          |               |             |               |
| MIR324      | MIR324   | 13.54181645   | 25.52974955 | 20.07108245   |
| 6.865320621 |          |               |             |               |
| MIR345      | MIR345   | 0 2.641008574 | 0           | 0             |
| MIR331      | MIR331   | 1.041678189   | 0 0         | 0             |
| SH3D21      | SH3D21   | 33.33370204   | 52.82017149 | 88.08975076   |
| 96.11448869 |          |               |             |               |
| UBXN2B      | UBXN2B   | 1402.098842   | 2214.045521 | 1587.845634   |

|             |             |             |   |             |             |
|-------------|-------------|-------------|---|-------------|-------------|
| 1803.617803 |             |             |   |             |             |
| OR56A5      | OR56A5      | 0           | 0 | 1.115060136 | 0           |
| SLIT2       | SLIT2       | 1.041678189 |   | 0           | 0           |
| EIF4A1      | EIF4A1      | 33190.99213 |   | 25264.76836 | 29108.64486 |
| 29539.51311 |             |             |   |             |             |
| PDP1        | PDP1        | 1959.396673 |   | 1979.876095 | 2433.061217 |
| 1452.505691 |             |             |   |             |             |
| GAD1        | GAD1        | 14.58349464 |   | 63.38420578 | 6.690360818 |
| 8.826840798 |             |             |   |             |             |
| ZNF592      | ZNF592      | 2027.105755 |   | 3366.405596 | 2408.529894 |
| 1825.194525 |             |             |   |             |             |
| RNASEL      | RNASEL      | 1016.677912 |   | 874.1738381 | 1086.068573 |
| 1050.394055 |             |             |   |             |             |
| CRYGA       | CRYGA       | 0           | 0 | 1.115060136 | 0           |
| MDN1        | MDN1        | 1473.974637 |   | 1861.030709 | 2349.431707 |
| 1856.578848 |             |             |   |             |             |
| BOLA1       | BOLA1       | 725.0080193 |   | 1011.506284 | 724.7890886 |
| 1028.817333 |             |             |   |             |             |
| CRYL1       | CRYL1       | 787.5087107 |   | 649.6881093 | 709.1782467 |
| 835.6075955 |             |             |   |             |             |
| GAL         | GAL         | 8.33342551  |   | 13.20504287 | 4.460240545 |
| 19.61520177 |             |             |   |             |             |
| HDGFRP3     | HDGFRP3     | 1608.351123 |   | 1832.859951 | 747.0902913 |
| 679.6667414 |             |             |   |             |             |
| ABHD13      | ABHD13      | 1643.768182 |   | 1508.896232 | 2594.744937 |
| 1813.425404 |             |             |   |             |             |
| RMDN3       | RMDN3       | 3579.206256 |   | 2210.524177 | 3325.109326 |
| 2679.436562 |             |             |   |             |             |
| PHF6        | PHF6        | 4997.971949 |   | 5681.68978  | 3729.876156 |
| 5091.12562  |             |             |   |             |             |
| PRDX2       | PRDX2       | 18155.40915 |   | 16662.1231  | 9532.649105 |
| 13728.67972 |             |             |   |             |             |
| LCMT2       | LCMT2       | 1009.386165 |   | 815.1913133 | 1126.210738 |
| 1068.047737 |             |             |   |             |             |
| ADORA2A-AS1 | ADORA2A-AS1 |             |   | 417.7129537 | 513.2359996 |
| 410.3421301 |             | 608.071255  |   |             |             |
| SLC36A3     | SLC36A3     | 1.041678189 |   | 0           | 0           |
| CACNG3      | CACNG3      | 0           | 0 | 5.575300681 | 0           |
| FAM71B      | FAM71B      | 8.33342551  |   | 0           | 30.10662368 |
| DZIP1       | DZIP1       | 1.041678189 |   | 0.880336191 | 0           |
| NME1-NME2   | NME1-NME2   |             |   | 27287.80183 | 22514.5981  |
| 21900.89614 |             | 23007.65092 |   |             |             |
| SLC9A1      | SLC9A1      | 1070.845178 |   | 1145.317385 | 1070.457731 |
| 893.4724408 |             |             |   |             |             |
| ZPLD1       | ZPLD1       | 0           | 0 | 0           | 5.884560532 |
| CDC73       | CDC73       | 6801.116894 |   | 5201.906555 | 5498.361532 |
| 5044.049136 |             |             |   |             |             |
| NKAP        | NKAP        | 1393.765416 |   | 1188.453858 | 1426.161914 |
| 1354.429682 |             |             |   |             |             |
| PGLS        | PGLS        | 1229.180263 |   | 1136.514023 | 1246.637232 |

|              |              |             |             |             |             |
|--------------|--------------|-------------|-------------|-------------|-------------|
| 1378.948685  |              |             |             |             |             |
| MIR1182      | MIR1182      | 265.6279381 | 271.143547  | 282.1102145 |             |
| 460.9572417  |              |             |             |             |             |
| MIR1237      | MIR1237      | 4.166712755 | 4.401680957 | 0           | 4.903800443 |
| MIR1181      | MIR1181      | 564.5895783 | 616.235334  | 410.3421301 |             |
| 545.3026093  |              |             |             |             |             |
| LOC101929076 | LOC101929076 |             | 0           | 0           | 5.575300681 |
| LINC00632    | LINC00632    |             | 11.45846008 | 72.1875677  | 0           |
| 11.15060136  | 3.923040355  |             |             |             |             |
| TRAF4        | TRAF4        | 447.9216211 | 920.8316562 | 626.6637966 |             |
| 596.3021339  |              |             |             |             |             |
| LINC00939    | LINC00939    |             | 0           | 7.923025723 | 0           |
| C6orf211     | C6orf211     |             | 4271.922252 | 3075.894653 | 0           |
| 2964.944902  | 2585.283594  |             |             |             |             |
| MIR3188      | MIR3188      | 0           | 2.641008574 | 0           | 0           |
| MIR3184      | MIR3184      | 4.166712755 | 3.521344766 | 10.03554123 |             |
| 6.865320621  |              |             |             |             |             |
| ARPC1A       | ARPC1A       | 4715.67716  | 3733.505788 | 3764.44302  |             |
| 3521.909478  |              |             |             |             |             |
| MASP2        | MASP2        | 8.33342551  | 23.76907717 | 18.95602232 |             |
| 19.61520177  |              |             |             |             |             |
| SNORD50B     | SNORD50B     |             | 69.79243864 | 25.52974955 |             |
| 97.01023186  | 49.03800443  |             |             |             |             |
| HNRNPA1P10   | HNRNPA1P10   |             | 36662.90553 | 30106.61741 |             |
| 39672.72459  | 37276.72945  |             |             |             |             |
| SNORD19      | SNORD19      | 21.87524196 | 20.2477324  | 44.60240545 |             |
| 46.09572417  |              |             |             |             |             |
| SNORD62B     | SNORD62B     |             | 0           | 3.521344766 | 5.575300681 |
| 4.903800443  |              |             |             |             |             |
| PP2D1        | PP2D1        | 963.5523245 | 505.3129739 | 702.4878858 |             |
| 686.5320621  |              |             |             |             |             |
| SNORD23      | SNORD23      | 29.16698928 | 24.64941336 | 17.84096218 |             |
| 21.57672195  |              |             |             |             |             |
| SNORD9       | SNORD9       | 1.041678189 | 1.760672383 | 2.230120273 |             |
| 0.980760089  |              |             |             |             |             |
| RAB19        | RAB19        | 412.5045627 | 100.3583258 | 551.9547675 |             |
| 278.5358652  |              |             |             |             |             |
| TLL10        | TLL10        | 13.54181645 | 4.401680957 | 0           | 1.961520177 |
| ITGB2        | ITGB2        | 19696.05119 | 27297.46462 | 9466.860557 |             |
| 19910.41056  |              |             |             |             |             |
| CD276        | CD276        | 169.7935448 | 315.1603565 | 55.75300681 |             |
| 329.5353898  |              |             |             |             |             |
| PRPSAP1      | PRPSAP1      | 3791.708607 | 3025.71549  | 2428.600977 |             |
| 2846.165777  |              |             |             |             |             |
| DAK          | DAK          | 1768.769564 | 1969.31206  | 1591.190814 |             |
| 2877.5501    |              |             |             |             |             |
| TF           | TF           | 1.041678189 | 0           | 0           | 0           |
| ZDHHC14      | ZDHHC14      | 742.7165485 | 917.3103115 | 286.570455  |             |
| 461.9380018  |              |             |             |             |             |
| EMB          | EMB          | 8487.593882 | 6013.576524 | 8259.250429 |             |

|             |           |             |             |             |             |
|-------------|-----------|-------------|-------------|-------------|-------------|
| 6677.014684 |           |             |             |             |             |
| C1orf87     | C1orf87   | 0           | 0           | 1.115060136 | 0           |
| MY018A      | MY018A    | 1819.811796 |             | 3322.388786 | 1681.510685 |
| 1966.423978 |           |             |             |             |             |
| TLDC1       | TLDC1     | 944.8021171 |             | 845.1227438 | 745.9752312 |
| 1066.086216 |           |             |             |             |             |
| LRRC37A2    | LRRC37A2  |             |             | 39.58377117 | 80.11059342 |
| 43.48734531 |           | 71.59548647 |             |             |             |
| CTBP1       | CTBP1     | 4841.720221 |             | 7847.31681  | 4975.398328 |
| 6286.672168 |           |             |             |             |             |
| AUTS2       | AUTS2     | 75.00082959 |             | 347.7327956 | 84.74457036 |
| 300.1125871 |           |             |             |             |             |
| CSTF3-AS1   | CSTF3-AS1 |             |             | 45.8338403  | 55.46118006 |
| 43.48734531 |           | 30.40356275 |             |             |             |
| LINC00421   | LINC00421 |             |             | 0           | 0           |
| MIR181A1    | MIR181A1  |             |             | 0           | 0           |
| MKRN20S     | MKRN20S   | 1.041678189 |             | 0           | 13.38072164 |
| KNDC1       | KNDC1     | 4.166712755 |             | 3.521344766 | 8.92048109  |
| 6.865320621 |           |             |             |             |             |
| CDYL2       | CDYL2     | 853.1344365 |             | 1203.419574 | 444.9089944 |
| 787.5503512 |           |             |             |             |             |
| RPL15       | RPL15     | 37897.29418 |             | 34996.00462 | 41490.27261 |
| 41185.0584  |           |             |             |             |             |
| BAI1        | BAI1      | 2.083356377 |             | 7.042689532 | 5.575300681 |
| TP53TG5     | TP53TG5   | 13.54181645 |             | 26.41008574 | 36.7969845  |
| 17.6536816  |           |             |             |             |             |
| RPS6KA4     | RPS6KA4   | 529.1725199 |             | 1380.367148 | 605.477654  |
| 653.1862191 |           |             |             |             |             |
| ZNF830      | ZNF830    | 1332.306403 |             | 1369.803114 | 1743.954053 |
| 1468.197853 |           |             |             |             |             |
| ADCK2       | ADCK2     | 1043.761545 |             | 998.3012411 | 1363.718547 |
| 1325.00688  |           |             |             |             |             |
| INHBC       | INHBC     | 0           | 9.683698106 | 0           | 2.942280266 |
| HEATR5A     | HEATR5A   | 1412.515624 |             | 1519.460266 | 1388.24987  |
| 1416.217568 |           |             |             |             |             |
| FAM115D     | FAM115D   | 592.7148894 |             | 359.1771661 | 607.7077743 |
| 553.14869   |           |             |             |             |             |
| CEP78       | CEP78     | 3152.118199 |             | 3374.328622 | 1832.043804 |
| 2540.16863  |           |             |             |             |             |
| C11orf96    | C11orf96  |             |             | 0           | 2.641008574 |
|             |           | 3.923040355 |             |             | 2.230120273 |
| PTPRQ       | PTPRQ     | 0           | 0           | 0           | 0.980760089 |
| PRICKLE3    | PRICKLE3  |             |             | 279.1697546 | 500.9112929 |
| 341.2084017 |           | 418.7845579 |             |             |             |
| JADE3       | JADE3     | 83.3342551  |             | 118.8453858 | 70.24878858 |
| 94.15296851 |           |             |             |             |             |
| ZNF699      | ZNF699    | 172.9185793 |             | 171.6655573 | 719.2137879 |
| 289.3242262 |           |             |             |             |             |
| TMEM232     | TMEM232   | 7.291747321 |             | 14.96571525 | 6.690360818 |
| 17.6536816  |           |             |             |             |             |

|             |          |             |             |             |             |             |
|-------------|----------|-------------|-------------|-------------|-------------|-------------|
| FBX047      | FBX047   | 0           | 0           | 0           | 0.980760089 |             |
| SGK223      | SGK223   | 25.00027653 |             | 149.6571525 |             | 165.0289002 |
| 186.3444168 |          |             |             |             |             |             |
| WIPF3       | WIPF3    | 0           | 0           | 0           | 0.980760089 |             |
| PIWIL2      | PIWIL2   | 12.50013826 |             | 10.5640343  |             | 46.83252572 |
| 22.55748204 |          |             |             |             |             |             |
| LEUTX       | LEUTX    | 5.208390943 |             | 36.97412004 | 0           | 0.980760089 |
| SLC7A6      | SLC7A6   | 3510.455496 |             | 3673.642927 |             | 5138.197108 |
| 4367.324675 |          |             |             |             |             |             |
| UBA52       | UBA52    | 7237.580055 |             | 9541.083643 |             | 8734.266047 |
| 7838.234629 |          |             |             |             |             |             |
| HLF         | HLF      | 634.3820169 |             | 176.0672383 |             | 334.5180409 |
| 376.611874  |          |             |             |             |             |             |
| JRKL        | JRKL     | 346.8788368 |             | 453.3731386 |             | 669.0360818 |
| 714.9741046 |          |             |             |             |             |             |
| EMD         | EMD      | 490.6304269 |             | 1964.910379 |             | 960.0667773 |
| 874.8379991 |          |             |             |             |             |             |
| PARK2       | PARK2    | 0           | 7.042689532 | 51.29276627 |             | 11.76912106 |
| PSMA3       | PSMA3    | 20696.06225 |             | 18070.661   |             | 17076.03093 |
| 15643.12341 |          |             |             |             |             |             |
| ATF5        | ATF5     | 715.6329156 |             | 676.9785312 |             | 730.3643893 |
| 727.7239858 |          |             |             |             |             |             |
| MIP         | MIP      | 9.375103698 |             | 7.923025723 |             | 14.49578177 |
| 10.78836098 |          |             |             |             |             |             |
| MDH1        | MDH1     | 23215.88179 |             | 19745.94077 |             | 15758.02985 |
| 17273.14668 |          |             |             |             |             |             |
| MIR3614     | MIR3614  | 51.04223125 |             | 153.1784973 |             | 91.43493117 |
| 53.94180488 |          |             |             |             |             |             |
| NR1D1       | NR1D1    | 176.0436139 |             | 220.0840479 |             | 287.6855152 |
| 209.882659  |          |             |             |             |             |             |
| LRRN4CL     | LRRN4CL  | 0           | 0.880336191 | 0           | 0           |             |
| TMEM88      | TMEM88   | 2.083356377 |             | 7.042689532 |             | 1.115060136 |
| 3.923040355 |          |             |             |             |             |             |
| LRRC10      | LRRC10   | 0           | 0           | 0           | 4.903800443 |             |
| GALNT7      | GALNT7   | 1687.518666 |             | 1679.681453 |             | 1515.366725 |
| 1701.618754 |          |             |             |             |             |             |
| CDON        | CDON     | 16.66685102 |             | 36.09378385 |             | 114.851194  |
| 31.38432284 |          |             |             |             |             |             |
| RFX7        | RFX7     | 716.6745938 |             | 1140.035368 |             | 1167.467963 |
| 732.6277862 |          |             |             |             |             |             |
| FAM46B      | FAM46B   | 0           | 0           | 0           | 0.980760089 |             |
| NUDT10      | NUDT10   | 3.125034566 |             | 44.01680957 |             | 73.59396899 |
| 45.11496408 |          |             |             |             |             |             |
| THOC5       | THOC5    | 3743.79141  |             | 3693.010323 |             | 3124.398502 |
| 3195.316369 |          |             |             |             |             |             |
| CCDC40      | CCDC40   | 6.250069132 |             | 0.880336191 |             | 24.531323   |
| 11.76912106 |          |             |             |             |             |             |
| WDR17       | WDR17    | 14.58349464 |             | 37.85445623 |             | 23.41626286 |
| 34.3266031  |          |             |             |             |             |             |
| ZEB2-AS1    | ZEB2-AS1 |             |             | 8.33342551  |             | 24.64941336 |



|                 |               |               |             |   |
|-----------------|---------------|---------------|-------------|---|
| 12.2656615      | 10.78836098   |               |             |   |
| RAET1E-AS1      | RAET1E-AS1    | 39.58377117   | 42.25613719 |   |
| 61.32830749     | 73.55700665   |               |             |   |
| TPTE2P3 TPTE2P3 | 0 3.521344766 | 0             | 0           |   |
| SBDSP1 SBDSP1   | 2092.731481   | 1140.915704   | 2876.855152 |   |
| 1664.34987      |               |               |             |   |
| AURKAPS1        | AURKAPS1      | 30.20866747   | 22.00840479 |   |
| 10.03554123     | 16.67292151   |               |             |   |
| FIS1 FIS1       | 2865.656697   | 2483.428396   | 2510.000367 |   |
| 2734.359127     |               |               |             |   |
| LOC101928823    | LOC101928823  | 2.083356377   | 0 0         |   |
| 1.961520177     |               |               |             |   |
| SNORA14A        | SNORA14A      | 0 1.760672383 | 7.805420954 |   |
| 0               |               |               |             |   |
| GUSBP5 GUSBP5   | 97.91774974   | 69.54655912   | 51.29276627 |   |
| 97.09524878     |               |               |             |   |
| SNORA5C SNORA5C | 78.12586415   | 51.93983529   | 98.12529199 |   |
| 80.42232727     |               |               |             |   |
| SNORA5B SNORA5B | 3.125034566   | 2.641008574   | 10.03554123 |   |
| 8.826840798     |               |               |             |   |
| LGALS8-AS1      | LGALS8-AS1    | 305.2117093   | 216.5627031 |   |
| 230.8174482     | 298.151067    |               |             |   |
| FAM200B FAM200B | 464.5884722   | 507.9539825   | 758.2408927 |   |
| 509.014486      |               |               |             |   |
| FAM178A FAM178A | 3315.661675   | 3840.026467   | 3758.867719 |   |
| 4067.212088     |               |               |             |   |
| ASB13 ASB13     | 528.1308417   | 650.5684455   | 951.1462962 |   |
| 1042.547974     |               |               |             |   |
| LOC101927621    | LOC101927621  | 37.50041479   | 58.10218863 |   |
| 85.85963049     | 46.09572417   |               |             |   |
| IP08 IP08       | 1882.312487   | 2845.246571   | 2070.666673 |   |
| 2210.63324      |               |               |             |   |
| SPIRE1 SPIRE1   | 525.0058071   | 408.4759928   | 274.3047935 |   |
| 439.3805197     |               |               |             |   |
| KIAA0922        | KIAA0922      | 4794.844703   | 5057.53142  |   |
| 6903.337304     | 8585.573816   |               |             |   |
| KIR3DL1 KIR3DL1 | 0 2.641008574 | 0             | 1.961520177 |   |
| OR5B12 OR5B12   | 0 0           | 14.49578177   | 0           |   |
| SLC16A11        | SLC16A11      | 1.041678189   | 10.5640343  |   |
| 7.805420954     | 23.53824213   |               |             |   |
| COX6B2 COX6B2   | 0 7.923025723 | 0             | 4.903800443 |   |
| MESP1 MESP1     | 51.04223125   | 69.54655912   | 41.25722504 |   |
| 38.24964346     |               |               |             |   |
| REX02 REX02     | 5809.439258   | 3868.197225   | 3487.908106 |   |
| 3559.178362     |               |               |             |   |
| APPBP2 APPBP2   | 2013.563939   | 2401.55713    | 2075.126914 |   |
| 2065.480747     |               |               |             |   |
| SLC9A3 SLC9A3   | 11.45846008   | 0.880336191   | 3.345180409 | 0 |
| SLC1A1 SLC1A1   | 103.1261407   | 68.66622293   | 39.02710477 |   |
| 107.8836098     |               |               |             |   |

|             |             |             |             |             |             |
|-------------|-------------|-------------|-------------|-------------|-------------|
| ZNF20       | ZNF20       | 287.5031801 | 272.0238832 | 350.1288828 |             |
| 297.1703069 |             |             |             |             |             |
| DX0         | DX0         | 4.166712755 | 64.26454197 | 1.115060136 |             |
| 62.76864567 |             |             |             |             |             |
| MIEF1       | MIEF1       | 5986.52455  | 4778.464847 | 6176.318095 |             |
| 6172.903998 |             |             |             |             |             |
| PDE8A       | PDE8A       | 540.6309799 | 803.7469428 | 1207.610128 |             |
| 1431.909729 |             |             |             |             |             |
| RMI1        | RMI1        | 3310.453284 | 2867.254976 | 2041.67511  |             |
| 2140.018513 |             |             |             |             |             |
| BAIAP2L2    | BAIAP2L2    | 0           | 2.641008574 | 17.84096218 |             |
| 3.923040355 |             |             |             |             |             |
| CHODL       | CHODL       | 5.208390943 | 44.89714576 | 4.460240545 |             |
| 30.40356275 |             |             |             |             |             |
| POF1B       | POF1B       | 3.125034566 | 0           | 2.230120273 | 9.807600887 |
| CDC42BPG    | CDC42BPG    | 0           | 9.683698106 | 21.18614259 |             |
| 9.807600887 |             |             |             |             |             |
| C12orf76    | C12orf76    | 178.1269703 | 242.0924526 |             |             |
| 341.2084017 | 311.8817082 |             |             |             |             |
| FLJ44635    | FLJ44635    | 0           | 3.521344766 | 0           | 0           |
| SLC2A7      | SLC2A7      | 1.041678189 | 4.401680957 | 4.460240545 |             |
| 1.961520177 |             |             |             |             |             |
| PLCXD2      | PLCXD2      | 231.2525579 | 189.2722812 | 149.4180583 |             |
| 155.9408541 |             |             |             |             |             |
| AK1         | AK1         | 122.9180263 | 199.8363155 | 159.4535995 |             |
| 249.1130625 |             |             |             |             |             |
| TWIST1      | TWIST1      | 7.291747321 | 7.923025723 | 10.03554123 |             |
| 28.44204257 |             |             |             |             |             |
| IL1A        | IL1A        | 142.7099119 | 25.52974955 | 54.63794668 |             |
| 179.4790962 |             |             |             |             |             |
| MRRF        | MRRF        | 2343.775925 | 1723.698263 | 2271.377498 |             |
| 2226.325401 |             |             |             |             |             |
| COL8A2      | COL8A2      | 0           | 1.760672383 | 4.460240545 | 1.961520177 |
| PABPN1L     | PABPN1L     | 4.166712755 | 0           | 0           | 0           |
| FGR         | FGR         | 15.62517283 | 3.521344766 | 42.37228518 |             |
| 10.78836098 |             |             |             |             |             |
| FBXL18      | FBXL18      | 364.587366  | 564.2954987 | 324.4824997 |             |
| 401.1308763 |             |             |             |             |             |
| PHC3        | PHC3        | 2530.23632  | 2463.180664 | 3310.613545 |             |
| 2376.381695 |             |             |             |             |             |
| CPEB4       | CPEB4       | 615.6318095 | 686.6622293 | 538.5740458 |             |
| 490.3800443 |             |             |             |             |             |
| ARMC2       | ARMC2       | 123.9597045 | 196.3149707 | 100.3554123 |             |
| 111.8066501 |             |             |             |             |             |
| DOK2        | DOK2        | 12338.67815 | 6851.656578 | 4158.059248 |             |
| 5104.856262 |             |             |             |             |             |
| PLK3        | PLK3        | 4936.512936 | 1979.876095 | 5354.518774 |             |
| 4123.115413 |             |             |             |             |             |
| BTAF1       | BTAF1       | 3535.455772 | 4765.259804 | 3341.835228 |             |
| 4660.571941 |             |             |             |             |             |

|              |              |             |             |
|--------------|--------------|-------------|-------------|
| METTL21B     | METTL21B     | 141.6682337 | 178.7082469 |
| 111.5060136  | 243.228502   |             |             |
| LOC100289230 | LOC100289230 | 25.00027653 | 49.29882672 |
| 91.43493117  | 68.65320621  |             |             |
| MAPKAP1      | MAPKAP1      | 5383.392879 | 5048.728058 |
| 6102.289272  |              |             | 4800.333887 |
| MIR6853      | MIR6853      | 5.208390943 | 2.641008574 |
| 12.74988115  |              |             | 24.531323   |
| MIR6852      | MIR6852      | 1609.392802 | 1378.606476 |
| 1125.912582  |              |             | 995.7487017 |
| MIR6840      | MIR6840      | 20.83356377 | 27.29042193 |
| 28.44204257  |              |             | 25.64638313 |
| MVB12B       | MVB12B       | 127.084739  | 529.0820511 |
| 459.9764816  |              |             | 454.9445356 |
| HIST3H2A     | HIST3H2A     | 145.8349464 | 70.42689532 |
| 117.0813143  | 64.73016585  |             |             |
| FAM69B       | FAM69B       | 56.25062219 | 41.375801   |
| 46.09572417  |              |             | 90.31987104 |
| DDTL         | DDTL         | 1582.309169 | 1792.364486 |
| 1329.91068   |              |             | 1391.59505  |
| TSSK1B       | TSSK1B       | 0           | 0           |
| EIF2A        | EIF2A        | 4703.177022 | 13.38072164 |
| 4065.250568  |              |             | 3214.987771 |
| USP24        | USP24        | 1115.63734  | 4785.838105 |
| 2396.977657  |              |             |             |
| FBXL2        | FBXL2        | 4.166712755 | 3730.864779 |
| 19.61520177  |              |             | 2623.736501 |
| GCAT         | GCAT         | 1390.640382 | 8.803361914 |
| 953.2988062  |              |             | 15.61084191 |
| AMMECR1      | AMMECR1      | 1816.686761 | 1301.136891 |
| 1187.700467  |              |             | 686.8770439 |
| REM2         | REM2         | 8.33342551  | 1342.871018 |
| 9.807600887  |              |             | 1349.222765 |
| PRMT9        | PRMT9        | 1532.308616 | 15.84605145 |
| 1245.565313  |              |             | 8.92048109  |
| ABCG4        | ABCG4        | 6.250069132 | 951.6434229 |
| TTLL3        | TTLL3        | 353.128906  | 1260.017954 |
| 505.0914457  |              |             |             |
| ANAPC1P1     | ANAPC1P1     | 13.54181645 | 0           |
| 225.2421475  | 17.6536816   |             | 14.49578177 |
| GNGT2        | GNGT2        | 948.9688299 | 3.923040355 |
| 753.2237481  |              |             |             |
| HSBP1L1      | HSBP1L1      | 168.7518666 | 497.3899482 |
| 258.9206634  |              |             | 518.5029634 |
| FLJ32255     | FLJ32255     | 839.5926201 | 13.54181645 |
| 3745.486998  | 1168.085266  |             | 30.8117667  |
| ZNF30-AS1    | ZNF30-AS1    | 0           | 787.0205551 |
| 0.980760089  |              |             | 556.415008  |
| LOC101927190 | LOC101927190 | 4.166712755 | 316.9210289 |
| 14.49578177  | 5.884560532  |             | 345.6686422 |

|             |           |             |             |             |             |
|-------------|-----------|-------------|-------------|-------------|-------------|
| UBAP2       | UBAP2     | 2996.908149 | 3365.52526  | 2285.873279 |             |
| 2721.609246 |           |             |             |             |             |
| MAT2B       | MAT2B     | 20215.84861 | 16233.39937 | 27273.25587 |             |
| 21560.04903 |           |             |             |             |             |
| SIGLEC9     | SIGLEC9   | 9.375103698 | 7.042689532 | 20.07108245 |             |
| 9.807600887 |           |             |             |             |             |
| MANF        | MANF      | 3229.202385 | 3636.668807 | 2825.562385 |             |
| 2519.572668 |           |             |             |             |             |
| MANBA       | MANBA     | 513.547347  | 377.6642261 | 770.5065542 |             |
| 487.4377641 |           |             |             |             |             |
| NAAA        | NAAA      | 2172.940702 | 2055.585007 | 2207.81907  |             |
| 2033.115664 |           |             |             |             |             |
| SPTLC3      | SPTLC3    | 1.041678189 | 2.641008574 | 25.64638313 |             |
| 38.24964346 |           |             |             |             |             |
| RAB7A       | RAB7A     | 17260.60759 | 14072.17402 | 20032.05535 |             |
| 16754.32459 |           |             |             |             |             |
| FANCG       | FANCG     | 6500.071897 | 5167.573444 | 3192.41717  |             |
| 4191.768619 |           |             |             |             |             |
| ESPL1       | ESPL1     | 3027.116816 | 5905.295172 | 2126.41968  |             |
| 3303.199979 |           |             |             |             |             |
| MICU3       | MICU3     | 30.20866747 | 36.09378385 | 61.32830749 |             |
| 83.36460754 |           |             |             |             |             |
| MIOS        | MIOS      | 2282.316911 | 2817.075813 | 2405.184714 |             |
| 3308.103779 |           |             |             |             |             |
| PYGB        | PYGB      | 4015.669417 | 3324.149459 | 3600.52918  |             |
| 3483.659835 |           |             |             |             |             |
| EX01        | EX01      | 6010.483149 | 4981.822507 | 4159.174308 |             |
| 4811.608995 |           |             |             |             |             |
| FXD2        | FXD2      | 18.7502074  | 27.29042193 | 49.062646   |             |
| 110.82589   |           |             |             |             |             |
| ATP1B1      | ATP1B1    | 588.5481766 | 570.4578521 | 372.4300855 |             |
| 409.9577171 |           |             |             |             |             |
| ATF4        | ATF4      | 9746.982812 | 8432.740378 | 13572.51198 |             |
| 9261.317517 |           |             |             |             |             |
| DDT         | DDT       | 1566.683996 | 1823.176252 | 1360.373366 |             |
| 1369.141084 |           |             |             |             |             |
| AKR1C2      | AKR1C2    | 5.208390943 | 3.521344766 | 0           | 0.980760089 |
| DBP         | DBP       | 301.0449965 | 360.0575023 | 758.2408927 |             |
| 519.802847  |           |             |             |             |             |
| LINC00950   | LINC00950 |             | 0           | 14.49578177 | 0           |
| AOX1        | AOX1      | 4.166712755 | 0           | 29.42280266 |             |
| USP13       | USP13     | 769.8001814 | 1111.86461  | 662.3457209 |             |
| 716.9356248 |           |             |             |             |             |
| JMJD7       | JMJD7     | 557.297831  | 611.833653  | 617.7433155 |             |
| 778.7235104 |           |             |             |             |             |
| NDUFS7      | NDUFS7    | 5846.939673 | 6347.22394  | 3736.566517 |             |
| 4481.092845 |           |             |             |             |             |
| DCAF10      | DCAF10    | 2129.190218 | 1936.739621 | 2717.401552 |             |
| 2521.534188 |           |             |             |             |             |
| NPM1        | NPM1      | 45673.42186 | 33163.14467 | 48250.88222 |             |

|                 |               |               |             |  |
|-----------------|---------------|---------------|-------------|--|
| 41717.61113     |               |               |             |  |
| ZNF257 ZNF257   | 358.3372969   | 237.6907717   | 526.3083843 |  |
| 371.7080736     |               |               |             |  |
| ACTL6A ACTL6A   | 11482.41867   | 9909.064171   | 8148.859476 |  |
| 9433.931293     |               |               |             |  |
| ZBTB7A ZBTB7A   | 1396.890451   | 1848.706002   | 1820.893203 |  |
| 1530.966498     |               |               |             |  |
| UACA UACA       | 38.54209298   | 74.82857627   | 78.05420954 |  |
| 146.1332532     |               |               |             |  |
| STMN3 STMN3     | 128.1264172   | 306.3569946   | 343.438522  |  |
| 476.6494031     |               |               |             |  |
| CYP3A7 CYP3A7   | 8.33342551    | 23.76907717   | 5.575300681 |  |
| 14.71140133     |               |               |             |  |
| CYP2A7 CYP2A7   | 0 0           | 0 1.961520177 |             |  |
| CYP1A2 CYP1A2   | 0 0           | 0 0.980760089 |             |  |
| ATP2A2 ATP2A2   | 1709.393908   | 5464.24674    | 1559.969131 |  |
| 1503.505216     |               |               |             |  |
| ATP2B4 ATP2B4   | 2790.655868   | 8783.994518   | 2072.896793 |  |
| 3319.8729       |               |               |             |  |
| PIK3CG PIK3CG   | 3869.834471   | 4781.105856   | 2711.826251 |  |
| 3117.836322     |               |               |             |  |
| KIAA2013        | KIAA2013      | 6422.987712   | 5302.264881 |  |
| 5011.080252     | 4619.380018   |               |             |  |
| CD3EAP CD3EAP   | 1984.396949   | 1061.685447   | 1558.854071 |  |
| 1597.658184     |               |               |             |  |
| DGAT1 DGAT1     | 1567.725674   | 1596.049515   | 1271.168555 |  |
| 1370.121844     |               |               |             |  |
| RGS17 RGS17     | 0 3.521344766 | 2.230120273   | 4.903800443 |  |
| PRR34-AS1       | PRR34-AS1     | 112.5012444   | 169.0245488 |  |
| 176.1795015     | 165.748455    |               |             |  |
| COP54 COP54     | 4867.762176   | 3888.444958   | 4048.783355 |  |
| 4536.99617      |               |               |             |  |
| TRMT11 TRMT11   | 1160.429502   | 815.1913133   | 1791.901639 |  |
| 1481.928494     |               |               |             |  |
| MET MET         | 33.33370204   | 44.89714576   | 14.49578177 |  |
| 21.57672195     |               |               |             |  |
| IL3 IL3         | 211.4606723   | 286.9895984   | 59.09818722 |  |
| 174.5752958     |               |               |             |  |
| CYP7A1 CYP7A1   | 0 0.880336191 | 0             | 0           |  |
| CYP2J2 CYP2J2   | 78.12586415   | 87.15328295   | 140.4975772 |  |
| 85.32612771     |               |               |             |  |
| APBA3 APBA3     | 2809.406075   | 2808.272451   | 2323.785324 |  |
| 2623.533237     |               |               |             |  |
| C16orf62        | C16orf62      | 4442.757475   | 3865.556217 |  |
| 2526.726269     | 3588.601164   |               |             |  |
| ZNRF1 ZNRF1     | 1944.813178   | 4900.831578   | 1093.873994 |  |
| 3333.603541     |               |               |             |  |
| ZNF747 ZNF747   | 600.0066367   | 673.4571864   | 831.8348617 |  |
| 696.339663      |               |               |             |  |
| CYP24A1 CYP24A1 | 0 7.923025723 | 0             | 0           |  |

|              |              |             |             |             |
|--------------|--------------|-------------|-------------|-------------|
| DAD1         | DAD1         | 9852.192309 | 10016.46519 | 10790.43694 |
| 8908.243885  |              |             |             |             |
| TMEM161B-AS1 | TMEM161B-AS1 | 256.2528344 | 240.3317803 |             |
| 334.5180409  | 228.5171007  |             |             |             |
| LINC00339    | LINC00339    | 179.1686485 | 169.0245488 |             |
| 502.8921215  | 251.0745827  |             |             |             |
| RASGRF2-AS1  | RASGRF2-AS1  | 51.04223125 | 74.82857627 |             |
| 86.97469063  | 111.8066501  |             |             |             |
| XKR9         | XKR9         | 19.79188559 | 76.58924866 | 39.02710477 |
| 178.4983361  |              |             |             |             |
| UNC119B      | UNC119B      | 513.547347  | 1209.581927 | 708.0631865 |
| 594.3406137  |              |             |             |             |
| SV2B         | SV2B         | 0           | 0.880336191 | 0           |
| POPDC2       | POPDC2       | 66.66740408 | 61.6235334  | 8.826840798 |
| 40.21116364  |              |             |             | 54.63794668 |
| GAL3ST2      | GAL3ST2      | 1.041678189 | 0.880336191 | 0           |
| NSMCE2       | NSMCE2       | 2752.113775 | 2693.828746 | 0.980760089 |
| 2047.827065  |              |             |             | 1881.10645  |
| ISLR         | ISLR         | 3.125034566 | 0           | 0           |
| MICU2        | MICU2        | 3157.32659  | 2708.794461 | 3019.582849 |
| 3137.451524  |              |             |             |             |
| WLS          | WLS          | 4.166712755 | 0.880336191 | 0           |
| PRSS33       | PRSS33       | 0           | 1.760672383 | 0           |
| GDF7         | GDF7         | 0           | 0           | 3.923040355 |
| COX10-AS1    | COX10-AS1    |             | 637.5070515 | 941.9597248 |
| 291.0306956  | 628.6672168  |             |             |             |
| TBC1D14      | TBC1D14      | 5508.394262 | 9044.574031 | 5011.080252 |
| 5477.545095  |              |             |             |             |
| SLC6A6       | SLC6A6       | 2040.647572 | 2497.513775 | 1874.416089 |
| 1521.158898  |              |             |             |             |
| C9orf3       | C9orf3       | 361.4623315 | 279.0665727 | 357.9343037 |
| 311.8817082  |              |             |             |             |
| ALS2CR11     | ALS2CR11     |             | 0           | 0.880336191 |
|              |              |             |             | 3.345180409 |
|              |              |             |             | 3.923040355 |
| NACA         | NACA         | 24251.30991 | 20695.82352 | 21089.13236 |
| 21411.95426  |              |             |             |             |
| IDE          | IDE          | 5899.023583 | 5397.34119  | 4437.939342 |
| 4144.692135  |              |             |             |             |
| CDC25C       | CDC25C       | 1202.09663  | 1412.939587 | 694.6824649 |
| 1075.893817  |              |             |             |             |
| CCR8         | CCR8         | 3186.493579 | 830.1570285 | 1121.750497 |
| 412.8999973  |              |             |             |             |
| CBL          | CBL          | 1550.017145 | 3525.746447 | 1619.067318 |
| 1839.905926  |              |             |             |             |
| MFNG         | MFNG         | 17238.73234 | 10514.73547 | 10413.54661 |
| 12271.27023  |              |             |             |             |
| SERPINE1     | SERPINE1     |             | 92.70935879 | 44.01680957 |
| 53.52288654  | 31.38432284  |             |             |             |
| NOC3L        | NOC3L        | 3269.827834 | 2178.832074 | 3258.205718 |
| 2902.069102  |              |             |             |             |

|              |              |             |             |             |             |
|--------------|--------------|-------------|-------------|-------------|-------------|
| FAM19A4      | FAM19A4      | 1.041678189 | 0           | 1.115060136 | 0           |
| SNRPB        | SNRPB        | 27376.34448 | 25527.10854 | 16509.58038 |             |
| 21556.12599  |              |             |             |             |             |
| IFIT1        | IFIT1        | 2044.814284 | 118.8453858 | 14877.13234 |             |
| 1025.875053  |              |             |             |             |             |
| ATP6AP2      | ATP6AP2      | 11420.95966 | 9070.984117 | 11768.34468 |             |
| 10529.44031  |              |             |             |             |             |
| TMOD1        | TMOD1        | 1045.844901 | 973.6518277 | 1253.327593 |             |
| 1390.717806  |              |             |             |             |             |
| FBXL6        | FBXL6        | 1706.268873 | 1781.800451 | 1256.672774 |             |
| 2102.74963   |              |             |             |             |             |
| LOC100506713 | LOC100506713 |             | 87.50096785 | 128.529084  |             |
| 188.445163   | 139.2679326  |             |             |             |             |
| TRG-AS1      | TRG-AS1      | 269.7946509 | 487.7062501 | 263.1541922 |             |
| 395.2463157  |              |             |             |             |             |
| POLD4        | POLD4        | 2212.524473 | 2174.430393 | 1990.382343 |             |
| 2222.402361  |              |             |             |             |             |
| FDXACB1      | FDXACB1      | 1801.061588 | 1193.735876 | 1965.85102  |             |
| 1824.213765  |              |             |             |             |             |
| TNRC6C-AS1   | TNRC6C-AS1   |             | 135.4181645 | 380.3052347 |             |
| 223.0120273  | 322.6700692  |             |             |             |             |
| RRM2         | RRM2         | 77862.31957 | 59132.18198 | 33781.86189 |             |
| 35485.86153  |              |             |             |             |             |
| D2HGDH       | D2HGDH       | 552.08944   | 800.225598  | 468.3252572 |             |
| 1011.163651  |              |             |             |             |             |
| GPR4         | GPR4         | 0           | 0           | 3.345180409 | 0.980760089 |
| GLUD2        | GLUD2        | 28.12531109 | 34.33311147 | 11.15060136 |             |
| 32.36508293  |              |             |             |             |             |
| ZFPM2        | ZFPM2        | 0           | 0           | 13.73064124 |             |
| TXNRD3       | TXNRD3       | 60.41733494 | 100.3583258 | 171.719261  |             |
| 272.6513047  |              |             |             |             |             |
| SNAP47       | SNAP47       | 4011.502705 | 2948.245905 | 2958.254542 |             |
| 2958.953188  |              |             |             |             |             |
| FCRL3        | FCRL3        | 426.0463792 | 81.8712658  | 870.8619664 |             |
| 389.3617552  |              |             |             |             |             |
| C20orf144    | C20orf144    |             | 4.166712755 | 4.401680957 |             |
| 1.115060136  | 2.942280266  |             |             |             |             |
| OVCA2        | OVCA2        | 4819.844979 | 3651.634522 | 3302.808124 |             |
| 3305.161499  |              |             |             |             |             |
| ZNF558       | ZNF558       | 600.0066367 | 586.3039035 | 1090.528813 |             |
| 1275.968875  |              |             |             |             |             |
| CAPN12       | CAPN12       | 317.7118476 | 506.1933101 | 156.1084191 |             |
| 222.6325401  |              |             |             |             |             |
| ZNF420       | ZNF420       | 758.3417214 | 580.1415502 | 1333.611923 |             |
| 1106.29738   |              |             |             |             |             |
| ZNF582       | ZNF582       | 163.5434756 | 127.6487478 | 328.9427402 |             |
| 207.9211388  |              |             |             |             |             |
| TRIM67       | TRIM67       | 0           | 0           | 4.460240545 | 0           |
| TERF2        | TERF2        | 2177.107414 | 2116.328204 | 2481.008803 |             |
| 2406.785258  |              |             |             |             |             |

|             |             |             |             |             |             |   |
|-------------|-------------|-------------|-------------|-------------|-------------|---|
| TD02        | TD02        | 3.125034566 | 0           | 17.84096218 | 0           |   |
| MIR7848     | MIR7848     | 14.58349464 | 29.93143051 | 8.92048109  |             |   |
| 27.46128248 |             |             |             |             |             |   |
| SPINK2      | SPINK2      | 11.45846008 | 5.282017149 | 189.5602232 |             |   |
| 26.48052239 |             |             |             |             |             |   |
| KRTAP12-4   | KRTAP12-4   |             | 0           | 2.641008574 | 0           | 0 |
| DNAJC14     | DNAJC14     | 4911.51266  | 3812.736045 | 4694.403174 |             |   |
| 4236.883583 |             |             |             |             |             |   |
| ACBD6       | ACBD6       | 2598.987081 | 1673.5191   | 1999.302824 |             |   |
| 2075.288348 |             |             |             |             |             |   |
| SNRNP48     | SNRNP48     | 550.0060836 | 855.6867781 | 865.2866657 |             |   |
| 772.8389499 |             |             |             |             |             |   |
| FAM81B      | FAM81B      | 2.083356377 | 0           | 2.230120273 | 0.980760089 |   |
| ING5        | ING5        | 1552.100501 | 1456.956397 | 1724.998031 |             |   |
| 1646.696189 |             |             |             |             |             |   |
| ACOT4       | ACOT4       | 188.5437522 | 132.0504287 | 457.1746559 |             |   |
| 348.1698315 |             |             |             |             |             |   |
| FRMD6       | FRMD6       | 214.5857069 | 178.7082469 | 491.7415201 |             |   |
| 204.9788585 |             |             |             |             |             |   |
| PRADC1      | PRADC1      | 1438.557579 | 1037.036034 | 1165.237842 |             |   |
| 913.0876425 |             |             |             |             |             |   |
| NOA1        | NOA1        | 1646.893216 | 1574.04111  | 1913.443194 |             |   |
| 1725.156996 |             |             |             |             |             |   |
| POLDIP3     | POLDIP3     | 9131.351002 | 8257.553476 | 9231.582868 |             |   |
| 8288.403509 |             |             |             |             |             |   |
| FAM228B     | FAM228B     | 116.6679571 | 83.63193819 | 136.0373366 |             |   |
| 125.5372913 |             |             |             |             |             |   |
| LURAP1      | LURAP1      | 18.7502074  | 0.880336191 | 22.30120273 |             |   |
| 2.942280266 |             |             |             |             |             |   |
| POU4F1      | POU4F1      | 0           | 5.282017149 | 0           | 0           |   |
| POU2AF1     | POU2AF1     | 327.0869513 | 1471.922112 | 269.844553  |             |   |
| 675.7437011 |             |             |             |             |             |   |
| CCNE1       | CCNE1       | 5307.350371 | 6069.037704 | 2840.058167 |             |   |
| 3845.560308 |             |             |             |             |             |   |
| S100A10     | S100A10     | 10779.2859  | 11734.88143 | 6924.523446 |             |   |
| 7181.125369 |             |             |             |             |             |   |
| LGALS7B     | LGALS7B     | 0           | 0.880336191 | 15.61084191 | 2.942280266 |   |
| MDC1        | MDC1        | 1.041678189 | 51.93983529 | 0           | 20.59596186 |   |
| SKP1        | SKP1        | 24442.9787  | 18735.31483 | 25608.47109 |             |   |
| 23996.25709 |             |             |             |             |             |   |
| SRSF6       | SRSF6       | 4535.466834 | 4650.816099 | 4796.988706 |             |   |
| 3061.932997 |             |             |             |             |             |   |
| C1orf200    | C1orf200    |             | 80.20922053 | 188.391945  |             |   |
| 129.3469758 | 108.8643698 |             |             |             |             |   |
| PLA2G12B    | PLA2G12B    |             | 0           | 0           | 3.345180409 | 0 |
| C22orf23    | C22orf23    |             | 30.20866747 | 30.8117667  |             |   |
| 25.64638313 | 17.6536816  |             |             |             |             |   |
| HIATL1      | HIATL1      | 11079.28922 | 7799.778656 | 9493.622    |             |   |
| 7296.85506  |             |             |             |             |             |   |
| ZHX3        | ZHX3        | 503.1305651 | 380.3052347 | 771.6216143 |             |   |



|             |             |             |             |             |             |
|-------------|-------------|-------------|-------------|-------------|-------------|
| 509.014486  |             |             |             |             |             |
| RIMKLB      | RIMKLB      | 13.54181645 | 5.282017149 | 488.3963397 |             |
| 331.49691   |             |             |             |             |             |
| ZNF583      | ZNF583      | 365.6290442 | 205.9986688 | 570.9107898 |             |
| 305.9971477 |             |             |             |             |             |
| ZDHHC4      | ZDHHC4      | 1506.266661 | 1504.494551 | 1541.013108 |             |
| 1392.679326 |             |             |             |             |             |
| SLC22A20    | SLC22A20    |             | 0           | 0           | 3.345180409 |
| 5.884560532 |             |             |             |             |             |
| APLF        | APLF        | 498.9638524 | 357.4164937 | 519.6180235 |             |
| 445.2650803 |             |             |             |             |             |
| PHLDB2      | PHLDB2      | 331.253664  | 316.9210289 | 136.0373366 |             |
| 136.3256523 |             |             |             |             |             |
| YIPF6       | YIPF6       | 2267.733417 | 1571.400102 | 1758.449835 |             |
| 1708.484074 |             |             |             |             |             |
| RPS8        | RPS8        | 12441.80429 | 15102.16736 | 13639.41559 |             |
| 13254.9726  |             |             |             |             |             |
| PELI2       | PELI2       | 58.33397857 | 340.6901061 | 369.0849051 |             |
| 310.9009481 |             |             |             |             |             |
| UBE2Q1      | UBE2Q1      | 770.8418596 | 2481.667724 | 1022.510145 |             |
| 975.8562882 |             |             |             |             |             |
| SERPINF1    | SERPINF1    |             | 15.62517283 | 31.69210289 |             |
| 43.48734531 | 27.46128248 |             |             |             |             |
| KATNB1      | KATNB1      | 3393.787539 | 3026.595826 | 2707.366011 |             |
| 2470.534663 |             |             |             |             |             |
| USP15       | USP15       | 11054.28894 | 7022.441799 | 10449.22854 |             |
| 8685.611345 |             |             |             |             |             |
| TMPRSS11D   | TMPRSS11D   |             | 0           | 1.760672383 | 5.575300681 |
| 0           |             |             |             |             |             |
| ARHGEF6     | ARHGEF6     | 16411.63986 | 15703.43698 | 7317.024614 |             |
| 10006.69518 |             |             |             |             |             |
| GALNT6      | GALNT6      | 565.6312565 | 534.3640682 | 515.157783  |             |
| 564.9178111 |             |             |             |             |             |
| RPL35       | RPL35       | 12168.8846  | 12980.55714 | 12305.80366 |             |
| 12107.48329 |             |             |             |             |             |
| CPNE3       | CPNE3       | 4622.967801 | 4216.810357 | 5614.327786 |             |
| 4963.626809 |             |             |             |             |             |
| BCL2L13     | BCL2L13     | 3659.415477 | 2749.289926 | 3991.915288 |             |
| 3222.777651 |             |             |             |             |             |
| SRI         | SRI         | 13909.52885 | 14753.55423 | 9040.907585 |             |
| 11985.86904 |             |             |             |             |             |
| HIST1H2BI   | HIST1H2BI   |             | 10.41678189 | 41.375801   | 0           |
| 1.961520177 |             |             |             |             |             |
| HIST1H2BH   | HIST1H2BH   |             | 176.0436139 | 188.391945  |             |
| 158.3385393 | 208.9018989 |             |             |             |             |
| TET1        | TET1        | 137.5015209 | 238.5711079 | 76.9391494  |             |
| 114.7489304 |             |             |             |             |             |
| PLXNA2      | PLXNA2      | 6.250069132 | 38.73479242 | 23.41626286 |             |
| 12.74988115 |             |             |             |             |             |
| SAMM50      | SAMM50      | 6196.943545 | 4848.891742 | 3903.825537 |             |

|              |              |             |             |             |
|--------------|--------------|-------------|-------------|-------------|
| 4188.826339  |              |             |             |             |
| NUFIP2       | NUFIP2       | 1157.304468 | 2574.103024 | 2686.179868 |
| 2392.073856  |              |             |             |             |
| VAC14        | VAC14        | 3540.664163 | 2940.322879 | 3619.485202 |
| 3646.46601   |              |             |             |             |
| TREML2       | TREML2       | 1290.639276 | 817.8323218 | 1008.014363 |
| 564.9178111  |              |             |             |             |
| EHD3         | EHD3         | 217.7107414 | 891.7805619 | 221.8969671 |
| 532.5527281  |              |             |             |             |
| ESPN         | ESPN         | 4.166712755 | 3.521344766 | 5.575300681 |
| 2.942280266  |              |             |             |             |
| TMEM63B      | TMEM63B      | 160.4184411 | 295.7929603 | 311.101778  |
| 322.6700692  |              |             |             |             |
| PI4K2A       | PI4K2A       | 2361.484454 | 1713.134229 | 1932.399216 |
| 1546.65866   |              |             |             |             |
| MARCKS       | MARCKS       | 7.291747321 | 29.05109432 | 23.41626286 |
| 3.923040355  |              |             |             |             |
| LRPAP1       | LRPAP1       | 5919.857146 | 4003.768999 | 4712.244136 |
| 4106.442491  |              |             |             |             |
| HSD11B2      | HSD11B2      | 11.45846008 | 14.96571525 | 32.33674395 |
| 28.44204257  |              |             |             |             |
| IL2RG        | IL2RG        | 67860.1256  | 53446.97085 | 42250.74362 |
| 46304.62607  |              |             |             |             |
| HPS1         | HPS1         | 5987.566229 | 5686.971797 | 3909.400838 |
| 5777.657682  |              |             |             |             |
| FM04         | FM04         | 146.8766246 | 133.8111011 | 196.250584  |
| 180.4598563  |              |             |             |             |
| XRCC6        | XRCC6        | 59277.73901 | 44525.64389 | 46299.52698 |
| 47799.30444  |              |             |             |             |
| PLRG1        | PLRG1        | 7294.872355 | 5563.72473  | 6500.800594 |
| 6431.824661  |              |             |             |             |
| PLP2         | PLP2         | 3805.250423 | 4046.905472 | 5234.09228  |
| 6003.232503  |              |             |             |             |
| LOC101929586 | LOC101929586 | 0           | 0           | 0           |
| ATP6V1B2     | ATP6V1B2     | 14954.33208 | 10616.72796 | 0.980760089 |
| 9572.79127   |              |             |             |             |
| CCDC64B      | CCDC64B      | 1.041678189 | 5.282017149 | 1.115060136 |
| 8.826840798  |              |             |             |             |
| ZNF674       | ZNF674       | 77.08418596 | 88.03361914 | 88.08975076 |
| 53.94180488  |              |             |             |             |
| STXBP5       | STXBP5       | 1729.185793 | 1170.847135 | 1193.114346 |
| 1382.871725  |              |             |             |             |
| DCAF12L2     | DCAF12L2     | 0           | 0           | 0           |
| TMC3         | TMC3         | 10.41678189 | 13.20504287 | 2.942280266 |
| 32.36508293  |              |             |             |             |
| EFEMP1       | EFEMP1       | 3.125034566 | 0           | 0.980760089 |
| TMEM64       | TMEM64       | 3350.037055 | 2674.46135  | 2475.433503 |
| 3143.336084  |              |             |             |             |
| GPR85        | GPR85        | 1.041678189 | 0.880336191 | 0           |
| ZNF207       | ZNF207       | 22676.29249 | 18861.2029  | 0           |
|              |              |             |             | 14688.68718 |

|             |             |             |             |             |             |
|-------------|-------------|-------------|-------------|-------------|-------------|
| 17625.23955 |             |             |             |             |             |
| MFSD2A      | MFSD2A      | 753.1333304 | 443.6894405 | 964.5270179 |             |
| 651.2246989 |             |             |             |             |             |
| CBFA2T3     | CBFA2T3     | 0           | 83.63193819 | 1.115060136 | 11.76912106 |
| DQX1        | DQX1        | 10.41678189 | 30.8117667  | 4.460240545 |             |
| 4.903800443 |             |             |             |             |             |
| AKT2        | AKT2        | 426.0463792 | 2075.832739 | 641.1595784 |             |
| 710.0703042 |             |             |             |             |             |
| EEF1E1      | EEF1E1      | 6203.193614 | 4669.303159 | 5463.794668 |             |
| 4866.53156  |             |             |             |             |             |
| RFX8        | RFX8        | 6.250069132 | 40.49546481 | 2.230120273 |             |
| 13.73064124 |             |             |             |             |             |
| GATA2       | GATA2       | 4.166712755 | 8.803361914 | 1.115060136 |             |
| 6.865320621 |             |             |             |             |             |
| TMOD2       | TMOD2       | 126.0430608 | 204.2379964 | 420.3776714 |             |
| 292.2665064 |             |             |             |             |             |
| FAM13B      | FAM13B      | 1082.303638 | 1065.206792 | 1735.033572 |             |
| 1124.931822 |             |             |             |             |             |
| ARL2BP      | ARL2BP      | 5766.730453 | 3693.010323 | 7021.533678 |             |
| 4693.917784 |             |             |             |             |             |
| AP3M1       | AP3M1       | 8168.840356 | 6393.881758 | 7329.290276 |             |
| 7319.412542 |             |             |             |             |             |
| HORMAD2     | HORMAD2     | 6.250069132 | 6.16235334  | 0           | 0.980760089 |
| LCA5L       | LCA5L       | 29.16698928 | 25.52974955 | 31.22168382 |             |
| 30.40356275 |             |             |             |             |             |
| CHD4        | CHD4        | 4613.592698 | 9246.171019 | 6382.60422  |             |
| 6732.918009 |             |             |             |             |             |
| UST         | UST         | 213.5440287 | 66.02521436 | 539.689106  |             |
| 312.8624683 |             |             |             |             |             |
| PRPH        | PRPH        | 4.166712755 | 1.760672383 | 0           | 0           |
| MBD3        | MBD3        | 3465.663334 | 3275.730968 | 3020.697909 |             |
| 3208.06625  |             |             |             |             |             |
| LECT1       | LECT1       | 0           | 0.880336191 | 2.230120273 | 2.942280266 |
| UXT-AS1     | UXT-AS1     | 1466.68289  | 1413.819923 | 1510.906485 |             |
| 1588.831344 |             |             |             |             |             |
| THAP11      | THAP11      | 5640.687392 | 4598.876264 | 5473.830209 |             |
| 5322.585001 |             |             |             |             |             |
| MRPL14      | MRPL14      | 5974.024412 | 4664.901478 | 4361.000193 |             |
| 4566.418973 |             |             |             |             |             |
| LINC01461   | LINC01461   |             | 1.041678189 | 0.880336191 |             |
| 10.03554123 | 1.961520177 |             |             |             |             |
| LINC01046   | LINC01046   |             | 0           | 0           | 3.923040355 |
| LINC01050   | LINC01050   |             | 1.041678189 | 0           | 0           |
| PRPF40B     | PRPF40B     | 384.3792516 | 541.4067577 | 441.563814  |             |
| 711.0510643 |             |             |             |             |             |
| ORMDL2      | ORMDL2      | 4046.919763 | 4037.221774 | 3659.627367 |             |
| 3532.697839 |             |             |             |             |             |
| TAPT1-AS1   | TAPT1-AS1   |             | 6.250069132 | 36.09378385 |             |
| 37.91204463 | 75.51852683 |             |             |             |             |
| RNF122      | RNF122      | 2.083356377 | 38.73479242 | 3.345180409 |             |

|             |             |             |             |             |             |
|-------------|-------------|-------------|-------------|-------------|-------------|
| 39.23040355 |             |             |             |             |             |
| MLLT4-AS1   | MLLT4-AS1   |             | 3.125034566 | 0           | 0           |
| 0.980760089 |             |             |             |             |             |
| CDH2        | CDH2        | 1.041678189 | 9.683698106 | 2.230120273 |             |
| 12.74988115 |             |             |             |             |             |
| CD47        | CD47        | 12454.30442 | 13036.89866 | 13738.65594 |             |
| 12798.91916 |             |             |             |             |             |
| SGPL1       | SGPL1       | 1828.145221 | 2911.271785 | 2101.888357 |             |
| 2618.629437 |             |             |             |             |             |
| WBP4        | WBP4        | 1198.971595 | 1223.667306 | 1080.493272 |             |
| 1177.892866 |             |             |             |             |             |
| CEP250      | CEP250      | 3865.667758 | 4899.951242 | 2588.054576 |             |
| 3211.98929  |             |             |             |             |             |
| DAB2        | DAB2        | 0           | 0           | 4.903800443 |             |
| ANXA5       | ANXA5       | 24298.18543 | 20593.70453 | 9617.393675 |             |
| 10985.49375 |             |             |             |             |             |
| FAM200A     | FAM200A     | 531.2558762 | 421.6810357 | 705.8330663 |             |
| 652.205459  |             |             |             |             |             |
| FAM72A      | FAM72A      | 1216.680124 | 930.5153543 | 555.2999479 |             |
| 773.81971   |             |             |             |             |             |
| DPH3        | DPH3        | 3178.160154 | 2937.681871 | 3402.048476 |             |
| 2976.606869 |             |             |             |             |             |
| EDC3        | EDC3        | 4457.340969 | 3950.948827 | 3706.459893 |             |
| 4035.827765 |             |             |             |             |             |
| SEMA4D      | SEMA4D      | 7573.000432 | 12442.67173 | 11693.63565 |             |
| 11390.54767 |             |             |             |             |             |
| LINC00999   | LINC00999   |             | 50.00055306 | 87.15328295 |             |
| 110.3909535 | 114.7489304 |             |             |             |             |
| ZNF252P     | ZNF252P     | 129.1680954 | 271.143547  | 663.4607811 |             |
| 572.7638918 |             |             |             |             |             |
| CEP83-AS1   | CEP83-AS1   |             | 37.50041479 | 47.53815434 |             |
| 33.45180409 | 31.38432284 |             |             |             |             |
| C6orf164    | C6orf164    |             | 14.58349464 | 8.803361914 |             |
| 7.805420954 | 2.942280266 |             |             |             |             |
| HNRNPU-AS1  | HNRNPU-AS1  |             | 3121.909532 | 2560.017645 |             |
| 2707.366011 | 2648.052239 |             |             |             |             |
| ZNF252P-AS1 | ZNF252P-AS1 |             | 11.45846008 | 23.76907717 |             |
| 120.4264947 | 105.9220896 |             |             |             |             |
| DYRK4       | DYRK4       | 666.6740408 | 678.7392036 | 594.3270526 |             |
| 715.9548647 |             |             |             |             |             |
| PROC        | PROC        | 4.166712755 | 3.521344766 | 1.115060136 |             |
| 12.74988115 |             |             |             |             |             |
| AKAP12      | AKAP12      | 30.20866747 | 60.74319721 | 90.31987104 |             |
| 62.76864567 |             |             |             |             |             |
| LRBA        | LRBA        | 2310.442223 | 7271.576941 | 2464.282901 |             |
| 3021.721833 |             |             |             |             |             |
| WBSCR27     | WBSCR27     | 5.208390943 | 57.22185244 | 8.92048109  |             |
| 41.19192372 |             |             |             |             |             |
| PROZ        | PROZ        | 8.33342551  | 3.521344766 | 0           | 8.826840798 |
| CCND1       | CCND1       | 6.250069132 | 12.32470668 | 28.99156354 |             |

|             |           |             |             |             |             |
|-------------|-----------|-------------|-------------|-------------|-------------|
| 133.3833721 |           |             |             |             |             |
| THEM4       | THEM4     | 2696.904831 | 1832.859951 | 2642.692523 |             |
| 2632.360078 |           |             |             |             |             |
| NEXN        | NEXN      | 12.50013826 | 46.65781815 | 396.9614085 |             |
| 80.42232727 |           |             |             |             |             |
| FAM64A      | FAM64A    | 734.383123  | 988.617543  | 470.5553775 |             |
| 743.4161472 |           |             |             |             |             |
| SLC7A1      | SLC7A1    | 2068.772883 | 5000.309567 | 3162.310546 |             |
| 2571.552952 |           |             |             |             |             |
| LRP4        | LRP4      | 3.125034566 | 0.880336191 | 0           | 11.76912106 |
| RAB3B       | RAB3B     | 3.125034566 | 12.32470668 | 47.94758586 |             |
| 15.69216142 |           |             |             |             |             |
| ADM         | ADM       | 0           | 2.641008574 | 12.2656615  | 37.26888337 |
| RPS17       | RPS17     | 15.62517283 | 2.641008574 | 13.38072164 |             |
| 6.865320621 |           |             |             |             |             |
| PZP         | PZP       | 5.208390943 | 0           | 13.38072164 | 2.942280266 |
| C11orf97    | C11orf97  | 0           | 0.880336191 | 0           | 0           |
| LRRC24      | LRRC24    | 691.6743173 | 624.1583597 | 866.4017259 |             |
| 828.7422749 |           |             |             |             |             |
| RPL6        | RPL6      | 9236.560499 | 8445.945421 | 9253.884071 |             |
| 9430.008253 |           |             |             |             |             |
| CLPB        | CLPB      | 1740.644253 | 1806.449865 | 1447.348057 |             |
| 1814.406164 |           |             |             |             |             |
| ZNF320      | ZNF320    | 83.3342551  | 173.4262297 | 374.6602058 |             |
| 396.2270758 |           |             |             |             |             |
| NIPAL1      | NIPAL1    | 14.58349464 | 19.36739621 | 61.32830749 |             |
| 63.74940576 |           |             |             |             |             |
| PPIG        | PPIG      | 3457.329908 | 3548.635188 | 3751.062298 |             |
| 3512.101878 |           |             |             |             |             |
| RPL19       | RPL19     | 22969.00406 | 20119.20332 | 26439.19089 |             |
| 24297.35044 |           |             |             |             |             |
| COL15A1     | COL15A1   | 20.83356377 | 6.16235334  | 0           | 14.71140133 |
| IFT81       | IFT81     | 141.6682337 | 155.8195059 | 171.719261  |             |
| 173.5945357 |           |             |             |             |             |
| SYNC        | SYNC      | 8051.13072  | 7242.525847 | 6784.025869 |             |
| 7249.778575 |           |             |             |             |             |
| CRYZ        | CRYZ      | 5812.564293 | 1767.715072 | 4116.802023 |             |
| 1795.771722 |           |             |             |             |             |
| UBE2A       | UBE2A     | 9035.516609 | 7795.376975 | 6177.433155 |             |
| 6082.67407  |           |             |             |             |             |
| MIR580      | MIR580    | 0           | 0           | 3.345180409 | 0.980760089 |
| ANKRD2      | ANKRD2    | 9.375103698 | 13.20504287 | 0           | 4.903800443 |
| LINC00896   | LINC00896 | 12.2656615  | 11.76912106 | 6.250069132 | 12.32470668 |
| 12.2656615  |           |             |             |             |             |
| MIRLET7A3   | MIRLET7A3 | 0           | 0           | 0           | 2.942280266 |
| ZNF451      | ZNF451    | 3996.91921  | 4810.15695  | 3834.691809 |             |
| 3823.983586 |           |             |             |             |             |
| SHANK3      | SHANK3    | 1.041678189 | 0.880336191 | 0           | 0.980760089 |
| GTSCR1      | GTSCR1    | 0           | 0           | 12.2656615  | 2.942280266 |
| BOLA3-AS1   | BOLA3-AS1 | 108.3345316 | 108.3345316 | 108.2813515 |             |

|              |              |             |             |             |             |
|--------------|--------------|-------------|-------------|-------------|-------------|
| 186.2150428  |              | 128.4795716 |             |             |             |
| PJA2         | PJA2         | 7439.665624 | 8418.654999 | 10245.17253 |             |
| 9954.7149    |              |             |             |             |             |
| SRRM1        | SRRM1        | 8985.516056 | 8235.545071 | 9107.811193 |             |
| 8641.477141  |              |             |             |             |             |
| ZBTB32       | ZBTB32       | 8077.172675 | 4869.139475 | 2571.328674 |             |
| 2967.780028  |              |             |             |             |             |
| IRX5         | IRX5         | 1.041678189 | 0           | 7.805420954 | 0           |
| MMADHC       | MMADHC       | 12342.84486 | 10073.68704 | 9247.19371  |             |
| 8521.82441   |              |             |             |             |             |
| SNTB1        | SNTB1        | 503.1305651 | 666.4144969 | 2564.638313 |             |
| 921.9144833  |              |             |             |             |             |
| IFT52        | IFT52        | 1244.805435 | 1287.051512 | 1130.670978 |             |
| 1240.661512  |              |             |             |             |             |
| STK36        | STK36        | 700.0077428 | 801.9862704 | 590.9818722 |             |
| 976.8370483  |              |             |             |             |             |
| HMX2         | HMX2         | 1.041678189 | 20.2477324  | 3.345180409 |             |
| 1.961520177  |              |             |             |             |             |
| LOC101928043 | LOC101928043 |             | 11.45846008 | 14.08537906 |             |
| 11.15060136  | 15.69216142  |             |             |             |             |
| CCSER2       | CCSER2       | 3728.166237 | 2104.883834 | 8154.434777 |             |
| 4442.843202  |              |             |             |             |             |
| BCORP1       | BCORP1       | 0           | 185.7509364 | 0           | 175.5560559 |
| DDR2         | DDR2         | 4.166712755 | 9.683698106 | 41.25722504 |             |
| 26.48052239  |              |             |             |             |             |
| FAM166A      | FAM166A      | 6232.360603 | 5001.189904 | 3842.49723  |             |
| 4781.205432  |              |             |             |             |             |
| ROR1-AS1     | ROR1-AS1     |             | 0           | 0           | 2.230120273 |
| C5orf58      | C5orf58      | 11.45846008 | 15.84605145 | 28.99156354 | 0           |
| 7.846080709  |              |             |             |             |             |
| ABHD12       | ABHD12       | 3618.790028 | 2646.290591 | 2450.90218  |             |
| 2233.190722  |              |             |             |             |             |
| COL28A1      | COL28A1      | 0           | 0.880336191 | 0           | 1.961520177 |
| FOSB         | FOSB         | 23.95859834 | 53.70050768 | 74.70902913 |             |
| 38.24964346  |              |             |             |             |             |
| WASF3        | WASF3        | 3.125034566 | 7.042689532 | 0           | 1.961520177 |
| MESDC2       | MESDC2       | 7100.078534 | 4879.703509 | 5247.473001 |             |
| 3952.463157  |              |             |             |             |             |
| KIAA1045     | KIAA1045     |             | 0           | 0           | 32.33674395 |
| 0.980760089  |              |             |             |             |             |
| G3BP2        | G3BP2        | 25714.86777 | 17729.9709  | 21789.39012 |             |
| 17298.64644  |              |             |             |             |             |
| OSBPL11      | OSBPL11      | 1442.724291 | 1555.55405  | 1339.187224 |             |
| 1054.317095  |              |             |             |             |             |
| TRIM73       | TRIM73       | 5.208390943 | 9.683698106 | 5.575300681 |             |
| 8.826840798  |              |             |             |             |             |
| LRP1B        | LRP1B        | 0           | 0           | 6.690360818 | 1.961520177 |
| SLC39A5      | SLC39A5      | 7.291747321 | 20.2477324  | 1.115060136 |             |
| 7.846080709  |              |             |             |             |             |
| LAPTM5       | LAPTM5       | 20990.85718 | 23093.85931 | 13992.88965 |             |

|             |          |             |             |             |             |
|-------------|----------|-------------|-------------|-------------|-------------|
| 15182.16617 |          |             |             |             |             |
| CMYA5       | CMYA5    | 11.45846008 | 21.12806859 | 0           | 2.942280266 |
| TSPAN17     | TSPAN17  | 3142.743095 | 3306.542735 |             | 2767.579258 |
| 2820.666015 |          |             |             |             |             |
| ASB15       | ASB15    | 0           | 0           | 1.961520177 |             |
| SLC16A14    | SLC16A14 |             | 81.25089872 |             | 234.1694269 |
| 3.345180409 |          | 158.8831344 |             |             |             |
| KIAA0232    | KIAA0232 |             | 1567.725674 |             | 2134.815264 |
| 1691.546227 |          | 1447.601891 |             |             |             |
| TIMM17B     | TIMM17B  | 3451.079839 | 3385.772992 |             | 2948.219    |
| 3202.18169  |          |             |             |             |             |
| FRMD4A      | FRMD4A   | 32.29202385 | 44.89714576 |             | 30.10662368 |
| 54.92256497 |          |             |             |             |             |
| ATG4A       | ATG4A    | 1504.183304 | 1250.957728 |             | 1315.770961 |
| 1186.719707 |          |             |             |             |             |
| MRPS33      | MRPS33   | 3530.247382 | 2538.00924  |             | 2779.84492  |
| 2362.651054 |          |             |             |             |             |
| TSGA13      | TSGA13   | 10.41678189 | 22.00840479 |             | 12.2656615  |
| 12.74988115 |          |             |             |             |             |
| C1orf210    | C1orf210 |             | 0           | 0.880336191 | 3.345180409 |
| 0           |          |             |             |             |             |
| BMI1        | BMI1     | 4972.971673 | 4512.603317 |             | 5642.20429  |
| 5519.717779 |          |             |             |             |             |
| ATP5G2      | ATP5G2   | 7917.795912 | 11218.12409 |             | 7502.124597 |
| 8147.174057 |          |             |             |             |             |
| ATP5C1      | ATP5C1   | 18842.91676 | 13847.68829 |             | 11783.95552 |
| 11933.88876 |          |             |             |             |             |
| FAM229A     | FAM229A  | 6.250069132 | 8.803361914 | 0           | 7.846080709 |
| COX7B       | COX7B    | 9750.107846 | 9939.875938 |             | 8582.617869 |
| 7594.025367 |          |             |             |             |             |
| COX6B1      | COX6B1   | 7442.790658 | 9629.997598 |             | 6141.751231 |
| 6469.093545 |          |             |             |             |             |
| CSNK1A1     | CSNK1A1  | 13318.89732 | 11000.68105 |             | 13087.46082 |
| 11214.99161 |          |             |             |             |             |
| ARMC12      | ARMC12   | 3.125034566 | 16.72638764 | 0           | 15.69216142 |
| PRRT3       | PRRT3    | 585.423142  | 514.996672  |             | 585.4065715 |
| 560.0140106 |          |             |             |             |             |
| SIPA1       | SIPA1    | 8168.840356 | 9334.204638 |             | 4483.656808 |
| 9182.85671  |          |             |             |             |             |
| IVNS1ABP    | IVNS1ABP |             | 20045.01339 |             | 15009.73206 |
| 20675.44505 |          | 19119.91793 |             |             |             |
| WIPI1       | WIPI1    | 1635.434756 | 1777.398771 |             | 897.6234097 |
| 1166.123745 |          |             |             |             |             |
| C9orf89     | C9orf89  | 2240.649784 | 2005.405844 |             | 1570.004672 |
| 1693.772673 |          |             |             |             |             |
| NFIA        | NFIA     | 21.87524196 | 70.42689532 |             | 161.6837198 |
| 287.362706  |          |             |             |             |             |
| ABCA3       | ABCA3    | 160.4184411 | 288.7502708 |             | 209.6313056 |
| 395.2463157 |          |             |             |             |             |
| ADCY2       | ADCY2    | 0           | 2.230120273 | 0           |             |

|              |              |             |             |             |             |
|--------------|--------------|-------------|-------------|-------------|-------------|
| ENDOV        | ENDOV        | 330.2119858 | 377.6642261 | 240.8529894 |             |
| 437.4189995  |              |             |             |             |             |
| IFITM3       | IFITM3       | 722.924663  | 16.72638764 | 4827.09533  |             |
| 96.11448869  |              |             |             |             |             |
| MAGEE1       | MAGEE1       | 43.75048393 | 145.2554716 | 112.6210738 |             |
| 137.3064124  |              |             |             |             |             |
| ABHD17B      | ABHD17B      | 2631.279105 | 2647.170928 | 1772.945617 |             |
| 1478.986214  |              |             |             |             |             |
| MAP3K10      | MAP3K10      | 6.250069132 | 58.98252483 | 32.33674395 |             |
| 27.46128248  |              |             |             |             |             |
| BSG          | BSG          | 18482.4961  | 17523.97223 | 13153.24937 |             |
| 15021.32152  |              |             |             |             |             |
| CALHM3       | CALHM3       | 10.41678189 | 5.282017149 | 0           | 0           |
| CBLB         | CBLB         | 4507.341522 | 8069.161531 | 4620.809205 |             |
| 7415.52703   |              |             |             |             |             |
| KMT2E-AS1    | KMT2E-AS1    |             | 210.4189941 | 324.8440546 |             |
| 389.1559876  | 288.3434661  |             |             |             |             |
| DLG5-AS1     | DLG5-AS1     |             | 0           | 1.760672383 | 0           |
| TAOK3        | TAOK3        | 4827.136726 | 4054.828498 | 3755.522539 | 0           |
| 3573.889763  |              |             |             |             |             |
| MMS19        | MMS19        | 4755.260931 | 4279.314227 | 5103.630244 |             |
| 5805.118965  |              |             |             |             |             |
| POLRMT       | POLRMT       | 4613.592698 | 4133.178419 | 4579.55198  |             |
| 4777.282392  |              |             |             |             |             |
| ARL6IP1      | ARL6IP1      | 35703.51992 | 31660.41079 | 23861.17186 |             |
| 25921.48914  |              |             |             |             |             |
| EED          | EED          | 10629.28424 | 7485.498636 | 9878.317747 |             |
| 9569.276185  |              |             |             |             |             |
| CHRND        | CHRND        | 0           | 0.880336191 | 6.690360818 | 0.980760089 |
| MAMDC4       | MAMDC4       | 29.16698928 | 69.54655912 | 37.91204463 |             |
| 64.73016585  |              |             |             |             |             |
| HDHD3        | HDHD3        | 894.8015641 | 783.4992104 | 1159.662542 |             |
| 1098.451299  |              |             |             |             |             |
| LOC101927814 | LOC101927814 |             | 11.45846008 | 9.683698106 |             |
| 10.03554123  | 2.942280266  |             |             |             |             |
| ANKRD20A1    | ANKRD20A1    |             | 0           | 0.880336191 | 1.115060136 |
| 0            |              |             |             |             |             |
| EMC7         | EMC7         | 8325.092084 | 5553.160696 | 5328.872391 |             |
| 4329.075031  |              |             |             |             |             |
| ZNF713       | ZNF713       | 41.66712755 | 31.69210289 | 46.83252572 |             |
| 63.74940576  |              |             |             |             |             |
| PHF1         | PHF1         | 57.29230038 | 48.41849053 | 428.1830923 |             |
| 163.7869348  |              |             |             |             |             |
| SNRNP25      | SNRNP25      | 4261.50547  | 4985.343852 | 2618.1612   |             |
| 4336.921112  |              |             |             |             |             |
| SH3BGRL3     | SH3BGRL3     |             | 55945.41048 | 58878.64516 |             |
| 32518.49875  | 43636.95863  |             |             |             |             |
| EIF2B3       | EIF2B3       | 4160.462686 | 2870.77632  | 3148.929825 |             |
| 3320.85366   |              |             |             |             |             |
| C8orf44      | C8orf44      | 105.2094971 | 170.7852211 | 231.9325083 |             |



|              |              |             |             |             |             |
|--------------|--------------|-------------|-------------|-------------|-------------|
| 143.1909729  |              |             |             |             |             |
| HSPA2        | HSPA2        | 516.6723816 | 438.4074233 | 595.4421128 |             |
| 525.6874075  |              |             |             |             |             |
| AK5          | AK5          | 18.7502074  | 12.32470668 | 237.507809  |             |
| 253.0361029  |              |             |             |             |             |
| HSH2D        | HSH2D        | 4105.253742 | 4492.355585 | 2883.545512 |             |
| 2212.59476   |              |             |             |             |             |
| ZNF335       | ZNF335       | 2220.857898 | 2953.527922 | 1777.405857 |             |
| 2513.688107  |              |             |             |             |             |
| LOC101927478 | LOC101927478 | 0           | 6.16235334  | 7.805420954 |             |
| 0            |              |             |             |             |             |
| LOC102724058 | LOC102724058 | 0           | 8.803361914 | 0           |             |
| 10.78836098  |              |             |             |             |             |
| HNRNPA1L2    | HNRNPA1L2    | 735.4248012 | 589.8252483 |             |             |
| 915.4643719  | 872.8764789  |             |             |             |             |
| ANXA2R       | ANXA2R       | 206.2522814 | 212.1610221 | 691.3372845 |             |
| 222.6325401  |              |             |             |             |             |
| TMEM235      | TMEM235      | 1.041678189 | 0           | 0           | 0           |
| ZNF544       | ZNF544       | 1838.562003 | 1561.716404 | 2026.064268 |             |
| 1878.15557   |              |             |             |             |             |
| CSTF2T       | CSTF2T       | 1953.146604 | 3320.628114 | 1606.801656 |             |
| 2729.455327  |              |             |             |             |             |
| XKR8         | XKR8         | 1033.344763 | 723.6363494 | 956.7215969 |             |
| 906.2223219  |              |             |             |             |             |
| RPL10        | RPL10        | 22100.24445 | 23074.49191 | 26289.77283 |             |
| 24181.62075  |              |             |             |             |             |
| MC5R         | MC5R         | 2.083356377 | 0           | 0           | 0           |
| ACTR5        | ACTR5        | 1478.14135  | 1201.658901 | 1448.463117 |             |
| 1492.716855  |              |             |             |             |             |
| ITGA1        | ITGA1        | 793.7587798 | 588.0645759 | 524.078264  |             |
| 538.4372887  |              |             |             |             |             |
| LZTS1        | LZTS1        | 157.2934065 | 383.8265795 | 255.3487712 |             |
| 222.6325401  |              |             |             |             |             |
| FAM92A1      | FAM92A1      | 119.7929917 | 117.0847135 | 121.5415549 |             |
| 75.51852683  |              |             |             |             |             |
| SHE          | SHE          | 0           | 0.880336191 | 15.61084191 | 1.961520177 |
| SERPINH1     | SERPINH1     | 391.670999  | 433.1254062 |             |             |
| 735.9396899  | 559.0332505  |             |             |             |             |
| LCMT1        | LCMT1        | 2626.070714 | 1919.132897 | 2365.042549 |             |
| 2029.192623  |              |             |             |             |             |
| MAMDC2-AS1   | MAMDC2-AS1   | 1.041678189 | 0.880336191 |             |             |
| 1.115060136  | 0            |             |             |             |             |
| LOC100505622 | LOC100505622 | 76.04250777 | 29.93143051 |             |             |
| 39.02710477  | 52.96104479  |             |             |             |             |
| LINC01095    | LINC01095    | 0           | 0.880336191 | 0           | 0           |
| LOC339666    | LOC339666    | 1.041678189 | 5.282017149 |             |             |
| 21.18614259  | 3.923040355  |             |             |             |             |
| SH2D3A       | SH2D3A       | 776.0502506 | 621.5173512 | 1340.302284 |             |
| 1261.257474  |              |             |             |             |             |
| TOM1L1       | TOM1L1       | 214.5857069 | 221.8447202 | 205.1710651 |             |

|             |             |             |             |             |             |
|-------------|-------------|-------------|-------------|-------------|-------------|
| 241.2669818 |             |             |             |             |             |
| DIAPH1      | DIAPH1      | 10284.48876 | 20930.87329 | 8556.971486 |             |
| 10229.32772 |             |             |             |             |             |
| MFSD9       | MFSD9       | 870.8429658 | 863.6098038 | 869.7469063 |             |
| 904.2608018 |             |             |             |             |             |
| C6orf118    | C6orf118    | 0           | 0           | 0           | 1.961520177 |
| NSMCE1      | NSMCE1      | 4674.010033 | 4063.63186  | 4639.765227 |             |
| 5201.95151  |             |             |             |             |             |
| CCDC138     | CCDC138     | 1181.263066 | 1099.539903 | 742.6300508 |             |
| 900.3377614 |             |             |             |             |             |
| NBPF1       | NBPF1       | 48.95887487 | 37.85445623 | 370.1999652 |             |
| 313.8432284 |             |             |             |             |             |
| SCAF4       | SCAF4       | 7615.709238 | 7257.491562 | 6088.228344 |             |
| 6968.30043  |             |             |             |             |             |
| SNX13       | SNX13       | 1794.811519 | 1695.527505 | 1614.607077 |             |
| 1678.080512 |             |             |             |             |             |
| CERS6       | CERS6       | 4899.012521 | 6266.233011 | 4102.306241 |             |
| 3956.386198 |             |             |             |             |             |
| RGP1        | RGP1        | 571.8813256 | 797.5845894 | 588.7517519 |             |
| 593.3598536 |             |             |             |             |             |
| PAFAH1B3    | PAFAH1B3    | 1631.268044 | 1817.013899 |             |             |
| 1477.454681 | 1805.579323 |             |             |             |             |
| CAAP1       | CAAP1       | 1840.645359 | 1644.468006 | 1553.27877  |             |
| 1742.810678 |             |             |             |             |             |
| SLC25A29    | SLC25A29    | 222.9191324 | 444.5697767 |             |             |
| 163.91384   | 271.6705446 |             |             |             |             |
| KCNIP2-AS1  | KCNIP2-AS1  | 8.33342551  | 11.44437049 |             |             |
| 17.84096218 | 21.57672195 |             |             |             |             |
| LINC00536   | LINC00536   | 3.125034566 | 11.44437049 |             | 0           |
| 11.76912106 |             |             |             |             |             |
| LINC00260   | LINC00260   | 34.37538023 | 33.45277527 |             |             |
| 11.15060136 | 23.53824213 |             |             |             |             |
| SLC25A46    | SLC25A46    | 7514.666453 | 6255.668976 |             |             |
| 3644.016525 | 4461.477643 |             |             |             |             |
| HSF2BP      | HSF2BP      | 23.95859834 | 25.52974955 | 95.89517172 |             |
| 55.90332505 |             |             |             |             |             |
| CCDC47      | CCDC47      | 10643.86773 | 8418.654999 | 8924.941331 |             |
| 8403.15244  |             |             |             |             |             |
| RAB25       | RAB25       | 0           | 1.115060136 | 18.63444168 |             |
| TXNDC16     | TXNDC16     | 778.133607  | 840.7210628 | 582.0613911 |             |
| 490.3800443 |             |             |             |             |             |
| GCNT3       | GCNT3       | 1.041678189 | 0           | 0           |             |
| RNVU1-20    | RNVU1-20    | 80.20922053 | 129.4094201 |             |             |
| 50.17770613 | 59.82636541 |             |             |             |             |
| C6orf201    | C6orf201    | 1830.228578 | 1786.202132 |             |             |
| 2281.413039 | 2308.709249 |             |             |             |             |
| ZNF154      | ZNF154      | 37.50041479 | 150.5374887 | 78.05420954 |             |
| 223.6133002 |             |             |             |             |             |
| GJA3        | GJA3        | 11.45846008 | 21.12806859 | 18.95602232 |             |
| 0.980760089 |             |             |             |             |             |

|             |          |             |             |             |
|-------------|----------|-------------|-------------|-------------|
| SLC18B1     | SLC18B1  | 478.1302886 | 500.0309567 | 727.0192088 |
| 689.4743423 |          |             |             |             |
| ZNF813      | ZNF813   | 327.0869513 | 453.3731386 | 778.3119751 |
| 826.7807547 |          |             |             |             |
| IFNGR2      | IFNGR2   | 279.1697546 | 215.6823669 | 1615.722137 |
| 1878.15557  |          |             |             |             |
| PAPL        | PAPL     | 0           | 0           | 5.884560532 |
| CXorf40B    | CXorf40B | 2193.323288 | 2965.657803 | 1626.861282 |
| 1770.27196  |          |             |             |             |
| EVX2        | EVX2     | 0           | 0           | 2.942280266 |
| ZNF799      | ZNF799   | 377.0875043 | 365.3395194 | 568.6806695 |
| 570.8023716 |          |             |             |             |
| DSC3        | DSC3     | 0           | 0           | 3.923040355 |
| SMG9        | SMG9     | 1004.177774 | 1454.315388 | 1029.200506 |
| 930.7413241 |          |             |             |             |
| OGFOD2      | OGFOD2   | 1432.307509 | 1200.778565 | 1178.618564 |
| 1490.755335 |          |             |             |             |
| FASTKD1     | FASTKD1  | 2829.197961 | 2427.08688  | 2000.417884 |
| 2212.59476  |          |             |             |             |
| PDPK1       | PDPK1    | 2868.781732 | 2848.767915 | 3417.659318 |
| 2773.589531 |          |             |             |             |
| GCFC2       | GCFC2    | 1509.391695 | 1089.856205 | 1691.546227 |
| 1565.293102 |          |             |             |             |
| ZNF768      | ZNF768   | 57.29230038 | 115.3240411 | 143.8427576 |
| 124.5565313 |          |             |             |             |
| DNAJC6      | DNAJC6   | 864.5928966 | 574.859533  | 604.3625939 |
| 479.5916834 |          |             |             |             |
| SOBP        | SOBP     | 18.7502074  | 9.683698106 | 27.87650341 |
| 3.923040355 |          |             |             |             |
| ARGLU1      | ARGLU1   | 4496.924741 | 4649.055427 | 3661.857487 |
| 4288.863868 |          |             |             |             |
| TCEA3       | TCEA3    | 37.50041479 | 19.36739621 | 443.7939342 |
| 327.5738696 |          |             |             |             |
| CASP7       | CASP7    | 3934.418519 | 2310.002166 | 4016.446611 |
| 2010.558182 |          |             |             |             |
| MCAT        | MCAT     | 1148.971042 | 831.9177009 | 876.4372671 |
| 927.7990439 |          |             |             |             |
| KCNMB3      | KCNMB3   | 29.16698928 | 64.26454197 | 34.56686422 |
| 42.17268381 |          |             |             |             |
| ZNF737      | ZNF737   | 360.4206533 | 335.4080889 | 1028.085446 |
| 536.4757685 |          |             |             |             |
| DISP2       | DISP2    | 36.4587366  | 26.41008574 | 103.7005927 |
| 27.46128248 |          |             |             |             |
| ISM2        | ISM2     | 1.041678189 | 3.521344766 | 22.30120273 |
| 5.884560532 |          |             |             |             |
| CNTD1       | CNTD1    | 3723.999525 | 2717.597823 | 3164.540667 |
| 2716.705446 |          |             |             |             |
| SNW1        | SNW1     | 9070.933667 | 6908.87843  | 6490.765053 |
| 7969.656481 |          |             |             |             |
| PLEK2       | PLEK2    | 11.45846008 | 12.32470668 | 208.5162455 |

|                 |             |             |             |             |  |
|-----------------|-------------|-------------|-------------|-------------|--|
| 344.2467911     |             |             |             |             |  |
| KHDC1L KHDC1L   | 7.291747321 | 0.880336191 | 15.61084191 |             |  |
| 2.942280266     |             |             |             |             |  |
| EHBP1L1 EHBP1L1 | 1633.3514   | 3441.234172 | 1048.156528 |             |  |
| 1849.713527     |             |             |             |             |  |
| LPCAT1 LPCAT1   | 3997.960888 | 4906.993931 | 3111.01778  |             |  |
| 3619.004727     |             |             |             |             |  |
| C5orf28 C5orf28 | 1257.305574 | 970.130483  | 1626.872739 |             |  |
| 1129.835622     |             |             |             |             |  |
| ARAP3 ARAP3     | 50.00055306 | 113.5633687 | 32.33674395 |             |  |
| 43.1534439      |             |             |             |             |  |
| TRMT44 TRMT44   | 973.9691064 | 679.6195398 | 948.916176  |             |  |
| 833.6460754     |             |             |             |             |  |
| OLIG1 OLIG1     | 0           | 0.880336191 | 0           |             |  |
| BUD31 BUD31     | 7579.250501 | 6069.91804  | 6422.746385 |             |  |
| 5922.810175     |             |             |             |             |  |
| MNT MNT         | 18.7502074  | 98.59765344 | 42.37228518 |             |  |
| 49.03800443     |             |             |             |             |  |
| DDX4 DDX4       | 11.45846008 | 4.401680957 | 0           | 10.78836098 |  |
| BRD7 BRD7       | 4300.047563 | 3606.737376 | 3633.980984 |             |  |
| 3513.082638     |             |             |             |             |  |
| VGf VGf         | 4.166712755 | 2.641008574 | 0           | 0           |  |
| CEBPZ CEBPZ     | 5493.810767 | 3719.420409 | 6836.433695 |             |  |
| 5314.73892      |             |             |             |             |  |
| VPS37D VPS37D   | 0           | 0.880336191 | 0           |             |  |
| COL6A5 COL6A5   | 0           | 7.042689532 | 0           | 1.961520177 |  |
| LPIN1 LPIN1     | 2696.904831 | 3076.774989 | 4895.113998 |             |  |
| 3853.406388     |             |             |             |             |  |
| ATPAF2 ATPAF2   | 1698.977126 | 1138.274696 | 1377.099268 |             |  |
| 1082.759138     |             |             |             |             |  |
| GP1BB GP1BB     | 0           | 0.880336191 | 0           |             |  |
| ZNF774 ZNF774   | 66.66740408 | 44.89714576 | 49.062646   |             |  |
| 42.17268381     |             |             |             |             |  |
| CHIC1 CHIC1     | 158.3350847 | 157.5801783 | 207.4011853 |             |  |
| 171.6330155     |             |             |             |             |  |
| COA3 COA3       | 3710.457708 | 3284.53433  | 2613.700959 |             |  |
| 2708.859365     |             |             |             |             |  |
| SPATA7 SPATA7   | 108.3345316 | 124.127403  | 171.719261  |             |  |
| 160.8446545     |             |             |             |             |  |
| ZC2HC1A ZC2HC1A | 1371.890175 | 566.9365073 | 839.6402826 |             |  |
| 458.9957215     |             |             |             |             |  |
| ACBD3 ACBD3     | 3990.669141 | 3239.637184 | 3938.392401 |             |  |
| 3097.24036      |             |             |             |             |  |
| FN3KRP FN3KRP   | 4338.589656 | 3067.091291 | 3199.107531 |             |  |
| 3213.950811     |             |             |             |             |  |
| ZNF329 ZNF329   | 82.29257691 | 161.101523  | 456.0595957 |             |  |
| 303.0548674     |             |             |             |             |  |
| ZC3H14 ZC3H14   | 4980.26342  | 4002.888662 | 4018.676731 |             |  |
| 4617.418497     |             |             |             |             |  |
| EIF1 EIF1       | 37403.53872 | 29911.18278 | 50235.68926 |             |  |

|             |           |             |             |             |             |
|-------------|-----------|-------------|-------------|-------------|-------------|
| 29522.84019 |           |             |             |             |             |
| STK3        | STK3      | 559.3811873 | 628.5600407 | 730.3643893 |             |
| 770.8774297 |           |             |             |             |             |
| RXRG        | RXRG      | 0           | 0           | 2.230120273 | 0           |
| POC5        | POC5      | 1927.104649 | 1649.750023 | 1510.906485 |             |
| 1647.676949 |           |             |             |             |             |
| KIAA1324L   | KIAA1324L |             | 93.75103698 | 208.6396774 |             |
| 385.8108071 |           | 401.1308763 |             |             |             |
| RIN3        | RIN3      | 1919.812902 | 2357.540321 | 1212.070368 |             |
| 1405.429207 |           |             |             |             |             |
| FUT11       | FUT11     | 827.0924818 | 907.6266134 | 778.3119751 |             |
| 1224.969351 |           |             |             |             |             |
| DMBX1       | DMBX1     | 2.083356377 | 1.760672383 | 14.49578177 |             |
| 2.942280266 |           |             |             |             |             |
| SPAG1       | SPAG1     | 1039.594832 | 1360.119416 | 731.4794494 |             |
| 831.6845552 |           |             |             |             |             |
| LEPREL2     | LEPREL2   | 5.208390943 | 8.803361914 | 85.85963049 |             |
| 99.05676896 |           |             |             |             |             |
| MTMR14      | MTMR14    | 5853.189742 | 4682.508202 | 4292.981525 |             |
| 4703.725385 |           |             |             |             |             |
| BCL3        | BCL3      | 5889.648479 | 9001.437557 | 3172.346088 |             |
| 6482.824186 |           |             |             |             |             |
| ARHGAP42    | ARHGAP42  |             | 0           | 19.36739621 | 0           |
| 7.846080709 |           |             |             |             |             |
| R3HDM2      | R3HDM2    | 554.1727964 | 1152.360075 | 1313.540841 |             |
| 1157.296905 |           |             |             |             |             |
| SCN1B       | SCN1B     | 0           | 2.641008574 | 18.95602232 | 31.38432284 |
| CLDN11      | CLDN11    | 4.166712755 | 0.880336191 | 0           | 0           |
| BDKRB2      | BDKRB2    | 1.041678189 | 0           | 3.345180409 | 1.961520177 |
| MTHFD2L     | MTHFD2L   | 202.0855686 | 194.5542983 | 166.1439603 |             |
| 266.7667441 |           |             |             |             |             |
| KLF15       | KLF15     | 0           | 1.760672383 | 1.115060136 | 0           |
| WDR7        | WDR7      | 3004.199896 | 4333.014734 | 2696.215409 |             |
| 2751.032049 |           |             |             |             |             |
| HAUS5       | HAUS5     | 2621.904001 | 3147.201884 | 1719.42273  |             |
| 2381.285495 |           |             |             |             |             |
| PRR14       | PRR14     | 1071.886856 | 1822.295916 | 1158.547482 |             |
| 1136.700943 |           |             |             |             |             |
| ZFYVE26     | ZFYVE26   | 463.546794  | 1142.676376 | 1132.901098 |             |
| 702.2242235 |           |             |             |             |             |
| WBSCR16     | WBSCR16   | 4162.546042 | 3625.224436 | 2886.890693 |             |
| 3355.180263 |           |             |             |             |             |
| RAB41       | RAB41     | 17.70852921 | 13.20504287 | 13.38072164 |             |
| 14.71140133 |           |             |             |             |             |
| TANG06      | TANG06    | 2844.823133 | 2433.249233 | 2638.232282 |             |
| 3233.566012 |           |             |             |             |             |
| LING03      | LING03    | 148.959981  | 211.2806859 | 63.55842777 |             |
| 126.5180514 |           |             |             |             |             |
| ACVRL1      | ACVRL1    | 1.041678189 | 0           | 0           | 0           |
| SLITRK1     | SLITRK1   | 0           | 0.880336191 | 0           | 0.980760089 |

|             |         |             |             |             |
|-------------|---------|-------------|-------------|-------------|
| CENPP       | CENPP   | 1704.185517 | 1615.416911 | 1013.589664 |
| 1391.698566 |         |             |             |             |
| PEX3        | PEX3    | 3211.493856 | 2185.874763 | 2402.954594 |
| 2627.456278 |         |             |             |             |
| CERS2       | CERS2   | 9350.103422 | 8391.364577 | 8206.842603 |
| 8130.501135 |         |             |             |             |
| ZNF90       | ZNF90   | 163.5434756 | 129.4094201 | 228.5873279 |
| 201.0558182 |         |             |             |             |
| CEP131      | CEP131  | 661.4656498 | 849.5244247 | 338.9782814 |
| 559.0332505 |         |             |             |             |
| TCP1        | TCP1    | 37125.41065 | 28064.23745 | 31566.2374  |
| 32421.96701 |         |             |             |             |
| OVCH2       | OVCH2   | 0           | 0           | 5.884560532 |
| FOLR3       | FOLR3   | 0           | 0           | 3.345180409 |
| CCDC64      | CCDC64  | 490.6304269 | 947.241742  | 826.259561  |
| 1263.218994 |         |             |             |             |
| GPR174      | GPR174  | 663.5490062 | 664.6538245 | 640.0445182 |
| 978.7985685 |         |             |             |             |
| ZNF385C     | ZNF385C | 79.16754234 | 38.73479242 | 44.60240545 |
| 88.26840798 |         |             |             |             |
| FAM134B     | FAM134B | 555.2144746 | 541.4067577 | 1593.420935 |
| 1248.507593 |         |             |             |             |
| SBF1        | SBF1    | 2776.072373 | 9944.277618 | 3590.493639 |
| 3970.116839 |         |             |             |             |
| MIR7705     | MIR7705 | 343.7538023 | 665.5341607 | 536.3439255 |
| 517.8413268 |         |             |             |             |
| CCDC15      | CCDC15  | 560.4228655 | 785.2598828 | 372.4300855 |
| 501.1684053 |         |             |             |             |
| ATAD5       | ATAD5   | 2794.82258  | 3115.509782 | 1680.395625 |
| 2092.942029 |         |             |             |             |
| ZKSCAN3     | ZKSCAN3 | 430.2130919 | 250.8958146 | 323.3674395 |
| 338.3622306 |         |             |             |             |
| ATP10A      | ATP10A  | 1677.101884 | 1239.513358 | 2399.609413 |
| 1486.832294 |         |             |             |             |
| GMEB1       | GMEB1   | 1796.894876 | 1571.400102 | 1486.375162 |
| 1487.813055 |         |             |             |             |
| VPREB3      | VPREB3  | 0           | 7.042689532 | 0           |
| GZMB        | GZMB    | 58561.06441 | 125370.4377 | 67029.60997 |
| 231105.3265 |         |             |             |             |
| GNG11       | GNG11   | 7.291747321 | 1.760672383 | 0           |
| GBP2        | GBP2    | 18580.41385 | 23694.24859 | 0.980760089 |
| 28814.73141 |         |             |             | 26102.44273 |
| FXYP7       | FXYP7   | 6.250069132 | 23.76907717 | 23.41626286 |
| 32.36508293 |         |             |             |             |
| TIGIT       | TIGIT   | 4507.341522 | 1517.699594 | 6429.436746 |
| 3781.810902 |         |             |             |             |
| TMEM101     | TMEM101 | 2006.272191 | 1556.434386 | 1475.22456  |
| 1686.907353 |         |             |             |             |
| ARL15       | ARL15   | 653.1322243 | 603.0302911 | 470.5553775 |
| 529.6104479 |         |             |             |             |

|              |              |             |             |             |             |
|--------------|--------------|-------------|-------------|-------------|-------------|
| ZFYVE20      | ZFYVE20      | 1386.473669 | 1461.358078 | 1813.087782 |             |
| 1629.042507  |              |             |             |             |             |
| PHF7         | PHF7         | 616.6734877 | 737.7217284 | 577.6011506 |             |
| 484.4954838  |              |             |             |             |             |
| EFCAB5       | EFCAB5       | 139.5848773 | 179.5885831 | 123.7716751 |             |
| 76.49928692  |              |             |             |             |             |
| ATP11B       | ATP11B       | 6900.076322 | 8359.672474 | 5549.654298 |             |
| 5975.77122   |              |             |             |             |             |
| GSE1         | GSE1         | 188.5437522 | 562.5348263 | 304.4114172 |             |
| 314.8239885  |              |             |             |             |             |
| FBXW9        | FBXW9        | 576.0480384 | 469.21919   | 507.352362  |             |
| 566.8793313  |              |             |             |             |             |
| LZTS3        | LZTS3        | 26.04195472 | 29.05109432 | 161.6837198 |             |
| 43.1534439   |              |             |             |             |             |
| NDUFAF1      | NDUFAF1      | 2613.570575 | 2257.181995 | 1710.502249 |             |
| 2160.614475  |              |             |             |             |             |
| FUCA1        | FUCA1        | 820.8424127 | 492.107931  | 1195.344466 |             |
| 1007.240611  |              |             |             |             |             |
| AC01         | AC01         | 1046.88658  | 1359.23908  | 2021.604027 |             |
| 2086.076709  |              |             |             |             |             |
| EEF1A2       | EEF1A2       | 1.041678189 | 2.641008574 | 8.92048109  |             |
| 1.961520177  |              |             |             |             |             |
| DUSP3        | DUSP3        | 369.795757  | 438.4074233 | 1039.236047 |             |
| 947.4142457  |              |             |             |             |             |
| PLCB3        | PLCB3        | 121.8763481 | 252.6564869 | 124.8867353 |             |
| 114.7489304  |              |             |             |             |             |
| RARRES2      | RARRES2      | 3.125034566 | 3.521344766 | 0           | 3.923040355 |
| PLA2G5       | PLA2G5       | 0           | 0           | 1.961520177 |             |
| RANGAP1      | RANGAP1      | 9801.150077 | 8689.798546 | 9481.356339 |             |
| 9061.242459  |              |             |             |             |             |
| PDE1B        | PDE1B        | 142.7099119 | 204.2379964 | 161.6837198 |             |
| 399.1693561  |              |             |             |             |             |
| PDE4C        | PDE4C        | 4.166712755 | 0           | 0           | 0           |
| PDE3B        | PDE3B        | 6925.076598 | 7497.823342 | 7768.623969 |             |
| 7745.06242   |              |             |             |             |             |
| RPS19        | RPS19        | 27882.60008 | 28247.34737 | 41018.60217 |             |
| 29801.37605  |              |             |             |             |             |
| UBE2B        | UBE2B        | 1718.769011 | 2274.788719 | 2819.987085 |             |
| 2132.172433  |              |             |             |             |             |
| LOC285593    | LOC285593    |             | 0           | 0           | 1.115060136 |
| TFEC         | TFEC         | 6.250069132 | 1.760672383 | 4.460240545 | 0           |
| 2.942280266  |              |             |             |             |             |
| TRRAP        | TRRAP        | 807.3005962 | 1908.568863 | 750.4354717 |             |
| 946.4334856  |              |             |             |             |             |
| ZNF197-AS1   | ZNF197-AS1   |             | 10.41678189 | 1.760672383 |             |
| 4.460240545  | 1.961520177  |             |             |             |             |
| LOC100131655 | LOC100131655 |             | 27.08363291 | 43.13647338 |             |
| 54.63794668  | 31.38432284  |             |             |             |             |
| ERVK13-1     | ERVK13-1     |             | 207.2939596 | 280.8272451 |             |
| 476.1306782  | 546.2833694  |             |             |             |             |

|              |              |             |             |             |
|--------------|--------------|-------------|-------------|-------------|
| ROPN1L       | ROPN1L       | 168.7518666 | 58.10218863 | 16.72590204 |
| 3.923040355  |              |             |             |             |
| INSM1        | INSM1        | 0           | 7.042689532 | 10.03554123 |
| EIF4A3       | EIF4A3       | 24738.8153  | 13660.17668 | 14696.4926  |
| 14583.90252  |              |             |             |             |
| KIAA0195     | KIAA0195     |             | 1023.969659 | 2014.209206 |
| 875.322207   |              | 1307.353198 |             |             |
| SOX8         | SOX8         | 1.041678189 | 13.20504287 | 304.4114172 |
| 136.3256523  |              |             |             |             |
| CLSTN3       | CLSTN3       | 239.5859834 | 745.6447541 | 309.9867179 |
| 479.5916834  |              |             |             |             |
| C15orf56     | C15orf56     |             | 0           | 2.641008574 |
| 2.942280266  |              |             |             | 0           |
| IL21R        | IL21R        | 8228.216013 | 11425.88343 | 8907.100368 |
| 16414.9816   |              |             |             |             |
| GOLGA8A      | GOLGA8A      | 489.5887487 | 1142.676376 | 342.3234618 |
| 775.7812301  |              |             |             |             |
| HSPBAP1      | HSPBAP1      | 468.7551849 | 507.9539825 | 671.266202  |
| 730.6662661  |              |             |             |             |
| ALKBH7       | ALKBH7       | 716.6745938 | 745.6447541 | 1003.554123 |
| 727.7239858  |              |             |             |             |
| KIAA0247     | KIAA0247     |             | 3800.042032 | 5479.212456 |
| 4267.335141  |              | 4795.916834 |             |             |
| PMEPA1       | PMEPA1       | 27.08363291 | 16.72638764 | 315.5620186 |
| 140.2486927  |              |             |             |             |
| HLX          | HLX          | 4.166712755 | 58.10218863 | 23.41626286 |
| 31.38432284  |              |             |             |             |
| ZNF665       | ZNF665       | 38.54209298 | 32.57243908 | 191.7903434 |
| 196.1520177  |              |             |             |             |
| ATP6V1B1-AS1 | ATP6V1B1-AS1 |             | 6.250069132 | 18.48706002 |
| 10.03554123  |              | 8.826840798 |             |             |
| FARP1        | FARP1        | 36.4587366  | 85.39261057 | 45.71746559 |
| 18.63444168  |              |             |             |             |
| MAP3K15      | MAP3K15      | 662.507328  | 451.6124662 | 842.985463  |
| 749.3007077  |              |             |             |             |
| FIGNL2       | FIGNL2       | 1.041678189 | 7.042689532 | 15.61084191 |
| 3.923040355  |              |             |             |             |
| AGMO         | AGMO         | 0           | 0           | 3.345180409 |
|              |              |             |             | 0           |
| PLA2G2D      | PLA2G2D      | 0           | 2.641008574 | 0           |
|              |              |             |             | 0           |
| MTX2         | MTX2         | 2340.65089  | 1699.929186 | 2096.313056 |
| 2061.557706  |              |             |             |             |
| EDEM1        | EDEM1        | 12328.26136 | 19830.45305 | 13514.52885 |
| 13983.67734  |              |             |             |             |
| FAM135B      | FAM135B      | 0           | 0           | 0.980760089 |
|              |              |             |             | 0           |
| DGCR11       | DGCR11       | 205.2106032 | 135.5717735 | 93.66505145 |
| 155.9408541  |              |             |             |             |
| LINC01004    | LINC01004    |             | 129.1680954 | 411.1170014 |
| 98.12529199  |              | 295.2087867 |             |             |
| CAMKMT       | CAMKMT       | 426.0463792 | 382.9462433 | 485.0511593 |
| 542.360329   |              |             |             |             |



|             |             |             |             |             |
|-------------|-------------|-------------|-------------|-------------|
| PXDC1       | PXDC1       | 37.50041479 | 57.22185244 | 89.2048109  |
| 72.57624656 |             |             |             |             |
| RTP4        | RTP4        | 902.0933114 | 720.9953408 | 2483.238923 |
| 731.6470261 |             |             |             |             |
| NPFFR1      | NPFFR1      | 3.125034566 | 0.880336191 | 0 0         |
| PARVG       | PARVG       | 3278.16126  | 2880.460018 | 1956.930539 |
| 2786.339412 |             |             |             |             |
| EPB41L4A    | EPB41L4A    |             | 88.54264604 | 116.2043773 |
| 121.5415549 | 121.614251  |             |             |             |
| ERRFI1      | ERRFI1      | 61.45901313 | 38.73479242 | 246.4282901 |
| 172.6137756 |             |             |             |             |
| YIPF5       | YIPF5       | 4601.092559 | 3284.53433  | 4311.937547 |
| 3796.522303 |             |             |             |             |
| CSRNP2      | CSRNP2      | 776.0502506 | 1244.795375 | 1417.241433 |
| 1152.393104 |             |             |             |             |
| ALKBH3      | ALKBH3      | 2239.608106 | 1529.143965 | 2096.313056 |
| 1988.98146  |             |             |             |             |
| PRKAB1      | PRKAB1      | 3741.708054 | 1964.030043 | 3379.747273 |
| 2291.055567 |             |             |             |             |
| HAA0        | HAA0        | 29.16698928 | 2.641008574 | 57.98312709 |
| 6.865320621 |             |             |             |             |
| MSRB1       | MSRB1       | 3332.328526 | 2264.224684 | 1787.441398 |
| 1965.443218 |             |             |             |             |
| GPATCH3     | GPATCH3     | 1061.470074 | 865.3704762 | 1044.811348 |
| 1052.355575 |             |             |             |             |
| SLC22A3     | SLC22A3     | 0           | 0.880336191 | 0           |
| 13.73064124 |             |             |             |             |
| C17orf75    | C17orf75    |             | 1631.268044 | 1457.836733 |
| 1155.202301 | 1508.409016 |             |             |             |
| OR6K2       | OR6K2       | 0           | 0           | 0.980760089 |
| CEACAM16    | CEACAM16    | 0           | 2.641008574 | 0           |
| 1.961520177 |             |             |             |             |
| H2AFB1      | H2AFB1      | 0           | 0.880336191 | 0           |
| 2.942280266 |             |             |             |             |
| ZNF793      | ZNF793      | 23.95859834 | 27.29042193 | 165.0289002 |
| 102.9798093 |             |             |             |             |
| ZBPB        | ZBPB        | 1.041678189 | 1.760672383 | 0           |
| 1.961520177 |             |             |             |             |
| H2BFXP      | H2BFXP      | 5.208390943 | 10.5640343  | 5.575300681 |
| 6.865320621 |             |             |             |             |
| CIDCEP      | CIDCEP      | 440.6298738 | 348.6131318 | 491.7415201 |
| 289.3242262 |             |             |             |             |
| FCGR1A      | FCGR1A      | 0           | 1.760672383 | 3.345180409 |
| 0           |             |             |             |             |
| ANKRD49     | ANKRD49     | 1686.476988 | 1461.358078 | 2011.568486 |
| 1691.811153 |             |             |             |             |
| MTERF3      | MTERF3      | 2390.651443 | 1840.782976 | 2404.069654 |
| 2296.940128 |             |             |             |             |
| MRPS12      | MRPS12      | 6680.282224 | 4612.081307 | 5179.454333 |
| 4825.339636 |             |             |             |             |
| IL13        | IL13        | 5764.647096 | 379.4248985 | 3655.167127 |
| 285.4011858 |             |             |             |             |
| CNKS1R1     | CNKS1R1     | 86.45928966 | 163.7425316 | 82.51445008 |
| 203.0173384 |             |             |             |             |

|             |          |             |             |             |             |
|-------------|----------|-------------|-------------|-------------|-------------|
| ASXL3       | ASXL3    | 0           | 0           | 3.345180409 | 0           |
| ACTR10      | ACTR10   | 5613.603759 |             | 3933.342103 | 4901.804359 |
| 4169.211137 |          |             |             |             |             |
| ZC3H15      | ZC3H15   | 6859.450873 |             | 5583.092126 | 6835.318635 |
| 6104.250792 |          |             |             |             |             |
| SMIM2       | SMIM2    | 1.041678189 |             | 0           | 1.115060136 |
| CRIP1       | CRIP1    | 9357.395169 |             | 11270.94426 | 4818.174849 |
| 5808.061245 |          |             |             |             |             |
| CNN1        | CNN1     | 0           | 6.16235334  | 0           | 4.903800443 |
| USP9Y       | USP9Y    | 0           | 1334.589666 | 0           | 1042.547974 |
| KIAA1107    | KIAA1107 |             |             | 25.00027653 | 29.05109432 |
| 68.01866831 |          | 62.76864567 |             |             |             |
| LAGE3       | LAGE3    | 2105.231619 |             | 1726.339271 | 1753.989594 |
| 1827.156045 |          |             |             |             |             |
| MRPL34      | MRPL34   | 3807.33378  |             | 3328.55114  | 2938.183459 |
| 3097.24036  |          |             |             |             |             |
| HTRA2       | HTRA2    | 4843.803577 |             | 4296.92095  | 3578.227977 |
| 3913.232754 |          |             |             |             |             |
| MROH5       | MROH5    | 1.041678189 |             | 0           | 1.115060136 |
| ZPR1        | ZPR1     | 5394.851339 |             | 4173.673884 | 4870.582675 |
| 5091.12562  |          |             |             |             |             |
| CHRD        | CHRD     | 0           | 0           | 0           | 0.980760089 |
| NDUFV1      | NDUFV1   | 10700.11835 |             | 8855.30175  | 7709.525782 |
| 10270.51965 |          |             |             |             |             |
| RPL23AP7    | RPL23AP7 |             |             | 518.755738  | 211.2806859 |
| 557.5300681 |          | 343.266031  |             |             |             |
| UQCR10      | UQCR10   | 7953.212971 |             | 7748.719157 | 6678.095156 |
| 5906.137254 |          |             |             |             |             |
| XP07        | XP07     | 4852.137003 |             | 5763.561045 | 3689.733991 |
| 5341.219443 |          |             |             |             |             |
| NUP88       | NUP88    | 9301.144547 |             | 7489.019981 | 10260.78337 |
| 11744.60206 |          |             |             |             |             |
| JAK2        | JAK2     | 4508.383201 |             | 4392.877595 | 4022.021912 |
| 2669.628961 |          |             |             |             |             |
| FAM177B     | FAM177B  | 16.66685102 |             | 5.282017149 | 5.575300681 |
| 4.903800443 |          |             |             |             |             |
| RHBDL1      | RHBDL1   | 3.125034566 |             | 0           | 2.230120273 |
| LAMB2P1     | LAMB2P1  | 10.41678189 |             | 4.401680957 | 15.61084191 |
| 11.76912106 |          |             |             |             |             |
| STBD1       | STBD1    | 291.6698928 |             | 375.0232176 | 138.2674569 |
| 196.1520177 |          |             |             |             |             |
| DPP4        | DPP4     | 13643.90092 |             | 13624.0829  | 8401.978127 |
| 9325.066923 |          |             |             |             |             |
| PKLR        | PKLR     | 7.291747321 |             | 9.683698106 | 15.61084191 |
| 10.78836098 |          |             |             |             |             |
| AGRP        | AGRP     | 4.166712755 |             | 1.760672383 | 14.49578177 |
| 10.78836098 |          |             |             |             |             |
| DHX37       | DHX37    | 545.8393709 |             | 1441.110345 | 695.797525  |
| 611.9942953 |          |             |             |             |             |
| SESN3       | SESN3    | 330.2119858 |             | 263.2205212 | 1606.801656 |

|                 |              |             |             |             |             |
|-----------------|--------------|-------------|-------------|-------------|-------------|
| 1282.834196     |              |             |             |             |             |
| SLC25A25-AS1    | SLC25A25-AS1 | 60.41733494 | 107.4010154 |             |             |
| 128.2319157     | 61.78788559  |             |             |             |             |
| POC1B-GALNT4    | POC1B-GALNT4 | 2242.73314  | 1590.767498 |             |             |
| 1508.676364     | 1167.104506  |             |             |             |             |
| C9orf173-AS1    | C9orf173-AS1 | 0           | 2.641008574 | 0           | 0           |
| GSTT2B GSTT2B   | 8.33342551   | 0           | 0           | 0           |             |
| FITM2 FITM2     | 168.7518666  | 108.2813515 | 94.78011158 |             |             |
| 125.5372913     |              |             |             |             |             |
| SOS1 SOS1       | 7859.461934  | 5436.956318 | 5840.684994 |             |             |
| 3278.680976     |              |             |             |             |             |
| MTSS1 MTSS1     | 458.338403   | 1315.22227  | 749.3204116 |             |             |
| 1061.182416     |              |             |             |             |             |
| RIMS3 RIMS3     | 91.66768061  | 581.9022225 | 194.0204637 |             |             |
| 389.3617552     |              |             |             |             |             |
| RNF144A RNF144A | 368.7540788  | 451.6124662 | 2507.770246 |             |             |
| 1474.082413     |              |             |             |             |             |
| COPRS COPRS     | 2771.90566   | 2150.661316 | 2373.96303  |             |             |
| 2088.038229     |              |             |             |             |             |
| DDIT4 DDIT4     | 7351.122978  | 8864.985448 | 7083.977046 |             |             |
| 21614.97159     |              |             |             |             |             |
| SNX27 SNX27     | 2239.608106  | 3063.569946 | 2465.397961 |             |             |
| 2620.590957     |              |             |             |             |             |
| DGCR9 DGCR9     | 2.083356377  | 0.880336191 | 1.115060136 |             |             |
| 3.923040355     |              |             |             |             |             |
| SH3RF3-AS1      | SH3RF3-AS1   | 7.291747321 | 2.641008574 |             |             |
| 4.460240545     | 28.44204257  |             |             |             |             |
| LOC100133315    | LOC100133315 | 230.2108797 | 212.1610221 |             |             |
| 181.7548022     | 251.0745827  |             |             |             |             |
| ALOX15P1        | ALOX15P1     | 20.83356377 | 20.2477324  |             |             |
| 12.2656615      | 27.46128248  |             |             |             |             |
| DDX11L1 DDX11L1 | 1.041678189  | 2.641008574 | 0           | 0           |             |
| AGBL1-AS1       | AGBL1-AS1    | 0           | 0           | 0           | 1.961520177 |
| TMEM54 TMEM54   | 13.54181645  | 18.48706002 | 45.71746559 |             |             |
| 34.3266031      |              |             |             |             |             |
| SLC13A5 SLC13A5 | 10.41678189  | 8.803361914 | 15.61084191 |             |             |
| 5.884560532     |              |             |             |             |             |
| TTC9B TTC9B     | 0            | 0.880336191 | 0           | 2.942280266 |             |
| ZNF560 ZNF560   | 12.50013826  | 0.880336191 | 0           | 1.961520177 |             |
| PDIA3P1 PDIA3P1 | 84.37593328  | 102.1189982 | 102.5855325 |             |             |
| 122.5950111     |              |             |             |             |             |
| FAM231D FAM231D | 53.12558762  | 107.4010154 | 320.0222591 |             |             |
| 261.8629437     |              |             |             |             |             |
| HNRNPKP3        | HNRNPKP3     | 1.041678189 | 2.641008574 |             |             |
| 2.230120273     | 0            |             |             |             |             |
| LOC90834        | LOC90834     | 30.20866747 | 24.64941336 |             |             |
| 20.07108245     | 24.51900222  |             |             |             |             |
| LINC00548       | LINC00548    | 4.166712755 | 3.521344766 |             |             |
| 16.72590204     | 1.961520177  |             |             |             |             |
| LINC01226       | LINC01226    | 0           | 0           | 3.345180409 | 0           |

|              |              |             |             |             |
|--------------|--------------|-------------|-------------|-------------|
| TSC1         | TSC1         | 1447.932682 | 1566.998421 | 2252.421475 |
| 1526.062698  |              |             |             |             |
| FOXE1        | FOXE1        | 4.166712755 | 2.641008574 | 13.38072164 |
| 2.942280266  |              |             |             |             |
| LRP2         | LRP2         | 0           | 0           | 1.115060136 |
| GCSH         | GCSH         | 551.0477618 | 594.2269292 | 0.980760089 |
| 528.6296878  |              |             |             | 462.7499566 |
| USP36        | USP36        | 2736.488602 | 3210.58609  | 3974.074326 |
| 3524.851759  |              |             |             |             |
| GCG          | GCG          | 1.041678189 | 1.760672383 | 0           |
| ABCA4        | ABCA4        | 1.041678189 | 11.44437049 | 0           |
| BTBD8        | BTBD8        | 22.91692015 | 31.69210289 | 0           |
| 70.61472638  |              |             |             | 57.98312709 |
| HMGXB3       | HMGXB3       | 3999.002566 | 4794.310899 | 3390.897874 |
| 4178.037978  |              |             |             |             |
| C9orf129     | C9orf129     | 0           | 4.401680957 | 2.230120273 |
| 0            |              |             |             |             |
| LINC00528    | LINC00528    | 81.25089872 | 71.30723151 |             |
| 132.6921562  | 41.19192372  |             |             |             |
| RNVU1-19     | RNVU1-19     | 11.45846008 | 12.32470668 |             |
| 17.84096218  | 5.884560532  |             |             |             |
| TSPEAR-AS1   | TSPEAR-AS1   | 0           | 0           | 0           |
| PGAM2        | PGAM2        | 28.12531109 | 28.17075813 | 4.903800443 |
| 37.26888337  |              |             |             | 46.83252572 |
| GLTP         | GLTP         | 3430.246275 | 2299.438132 | 3451.111122 |
| 2830.473616  |              |             |             |             |
| ZSCAN29      | ZSCAN29      | 492.7137833 | 981.5748535 | 830.7198015 |
| 435.4574794  |              |             |             |             |
| C9orf142     | C9orf142     | 1982.313593 | 1697.288177 |             |
| 1650.289002  | 2026.250343  |             |             |             |
| ATF1         | ATF1         | 1341.681507 | 1524.742284 | 1823.123323 |
| 1637.869348  |              |             |             |             |
| IP09         | IP09         | 10557.40844 | 10012.94384 | 6884.381281 |
| 9314.278562  |              |             |             |             |
| MFN2         | MFN2         | 9068.850311 | 7585.856962 | 8154.434777 |
| 7779.389023  |              |             |             |             |
| DENND4B      | DENND4B      | 2463.568916 | 4601.517273 | 2985.015985 |
| 3212.97005   |              |             |             |             |
| FAIM3        | FAIM3        | 2370.859557 | 3383.131984 | 4443.514643 |
| 4089.76957   |              |             |             |             |
| LINC01010    | LINC01010    | 2.083356377 | 18.48706002 |             |
| 1.115060136  | 33.34584301  |             |             |             |
| HAX1         | HAX1         | 12138.67593 | 8561.269462 | 10096.86953 |
| 8767.995193  |              |             |             |             |
| FAM83G       | FAM83G       | 426.0463792 | 538.7657492 | 558.6451283 |
| 674.762941   |              |             |             |             |
| MAK          | MAK          | 214.5857069 | 220.0840479 | 227.4722678 |
| 193.2097375  |              |             |             |             |
| RAD51L3-RFFL | RAD51L3-RFFL | 3122.95121  | 5196.624538 |             |
| 3396.473175  | 3658.235131  |             |             |             |

|             |            |             |             |             |             |
|-------------|------------|-------------|-------------|-------------|-------------|
| ORC6        | ORC6       | 3518.788921 | 2995.784059 | 1975.886561 |             |
| 2341.074332 |            |             |             |             |             |
| PTGS2       | PTGS2      | 333.3370204 | 11.44437049 | 101.4704724 |             |
| 2.942280266 |            |             |             |             |             |
| NACA2       | NACA2      | 1.041678189 | 0.880336191 | 2.230120273 |             |
| 2.942280266 |            |             |             |             |             |
| CD27        | CD27       | 5219.849404 | 8791.917544 | 3580.458098 |             |
| 8445.325124 |            |             |             |             |             |
| TCEB3       | TCEB3      | 8398.009557 | 5574.288764 | 7263.501728 |             |
| 6008.136303 |            |             |             |             |             |
| KRTAP5-7    | KRTAP5-7   | 0           | 1.760672383 | 0           | 0           |
| NUDT19      | NUDT19     | 398.9627463 | 811.6699685 | 259.8090118 |             |
| 377.5926341 |            |             |             |             |             |
| MED4        | MED4       | 5318.808831 | 4508.201636 | 5303.226008 |             |
| 4903.800443 |            |             |             |             |             |
| FSCN3       | FSCN3      | 1.041678189 | 0           | 5.575300681 | 1.961520177 |
| ZC3H7A      | ZC3H7A     | 6470.904908 | 6433.496887 | 6553.208421 |             |
| 6518.131549 |            |             |             |             |             |
| TMOD4       | TMOD4      | 68.75076045 | 92.4353001  | 119.3114346 |             |
| 66.69168603 |            |             |             |             |             |
| TAF1B       | TAF1B      | 2021.897364 | 1854.868355 | 1248.867353 |             |
| 1215.16175  |            |             |             |             |             |
| MSH4        | MSH4       | 1.041678189 | 5.282017149 | 3.345180409 |             |
| 0.980760089 |            |             |             |             |             |
| FZD7        | FZD7       | 13.54181645 | 1.760672383 | 60.21324736 |             |
| 15.69216142 |            |             |             |             |             |
| REEP5       | REEP5      | 16203.30423 | 12351.9971  | 10888.56223 |             |
| 8738.57239  |            |             |             |             |             |
| NUDT11      | NUDT11     | 90.62600242 | 96.83698106 | 64.6734879  |             |
| 106.9028497 |            |             |             |             |             |
| SLC5A6      | SLC5A6     | 7553.208546 | 4303.96364  | 6165.167493 |             |
| 5710.965996 |            |             |             |             |             |
| PSMD8       | PSMD8      | 19607.50855 | 14166.36999 | 13818.94027 |             |
| 12619.44006 |            |             |             |             |             |
| PSMD7       | PSMD7      | 13873.07012 | 10356.27496 | 10084.60387 |             |
| 10029.25267 |            |             |             |             |             |
| GTF3A       | GTF3A      | 22685.66759 | 16868.12176 | 16690.22012 |             |
| 15110.57069 |            |             |             |             |             |
| PSMC6       | PSMC6      | 9383.437124 | 7576.173264 | 7443.02641  |             |
| 7371.392826 |            |             |             |             |             |
| ZNF624      | ZNF624     | 216.6690632 | 363.5788471 | 1107.254715 |             |
| 547.2641295 |            |             |             |             |             |
| SLC25A24    | SLC25A24   |             | 2067.731205 | 2464.941336 |             |
| 2056.170891 | 2102.74963 |             |             |             |             |
| LMF2        | LMF2       | 2422.943467 | 3036.279524 | 2004.878125 |             |
| 2191.018038 |            |             |             |             |             |
| ZNF430      | ZNF430     | 1846.895429 | 1582.844472 | 3002.856947 |             |
| 2248.882883 |            |             |             |             |             |
| CCDC174     | CCDC174    | 944.8021171 | 734.2003837 | 1204.264947 |             |
| 987.6254093 |            |             |             |             |             |

|                 |               |             |               |
|-----------------|---------------|-------------|---------------|
| PRPF4B PRPF4B   | 2248.983209   | 3090.860368 | 2391.803992   |
| 2411.689058     |               |             |               |
| SHFM1 SHFM1     | 7884.46221    | 8866.74612  | 5625.478387   |
| 6542.650552     |               |             |               |
| AIMP2 AIMP2     | 5457.352031   | 3754.633856 | 4280.715863   |
| 4215.306861     |               |             |               |
| DYNC1LI1        | DYNC1LI1      | 3257.327696 | 2644.529919   |
| 2342.741346     | 2502.899746   |             |               |
| LINC00923       | LINC00923     | 0 0         | 0 2.942280266 |
| HSD17B3 HSD17B3 | 0 0           | 1.115060136 | 2.942280266   |
| ZNF615 ZNF615   | 589.5898548   | 637.3634026 | 1093.873994   |
| 781.6657907     |               |             |               |
| SMIM5 SMIM5     | 0 2.641008574 | 2.230120273 | 4.903800443   |
| NDUFS8 NDUFS8   | 5067.764388   | 5154.368401 | 3892.674936   |
| 4350.651753     |               |             |               |
| C3orf38 C3orf38 | 2991.699758   | 2799.469089 | 2836.712987   |
| 2638.244639     |               |             |               |
| INTS4 INTS4     | 3857.334333   | 3266.04727  | 3536.970752   |
| 3767.099501     |               |             |               |
| TCF20 TCF20     | 307.2950657   | 772.0548399 | 527.4234445   |
| 476.6494031     |               |             |               |
| TRAPPC3 TRAPPC3 | 5461.518743   | 4629.688031 | 4859.432074   |
| 4220.210662     |               |             |               |
| SMC1B SMC1B     | 17.70852921   | 17.60672383 | 60.21324736   |
| 44.13420399     |               |             |               |
| SNORA58 SNORA58 | 13.54181645   | 9.683698106 | 1.115060136   |
| 12.74988115     |               |             |               |
| CYB5R4 CYB5R4   | 4239.630228   | 3347.918536 | 3336.259928   |
| 2867.742499     |               |             |               |
| GLTSCR1 GLTSCR1 | 34.37538023   | 146.1358078 | 56.86806695   |
| 42.17268381     |               |             |               |
| C14orf1 C14orf1 | 2734.405245   | 2858.451614 | 2838.943107   |
| 2854.992618     |               |             |               |
| PNKP PNKP       | 1837.520325   | 1579.323127 | 1154.087241   |
| 1660.42683      |               |             |               |
| AATK AATK       | 4.166712755   | 1.760672383 | 12.2656615    |
| 18.63444168     |               |             |               |
| ZNF777 ZNF777   | 416.6712755   | 443.6894405 | 412.5722504   |
| 394.2655556     |               |             |               |
| NOL7 NOL7       | 6401.11247    | 4610.320635 | 6060.351841   |
| 5183.317069     |               |             |               |
| RAB4B RAB4B     | 1981.271915   | 1988.679456 | 1570.004672   |
| 1675.138231     |               |             |               |
| WDR830S WDR830S | 5754.230314   | 6530.333868 | 5926.544624   |
| 5484.410416     |               |             |               |
| LIN7B LIN7B     | 82.29257691   | 86.27294676 | 241.9680496   |
| 120.6334909     |               |             |               |
| HOXB5 HOXB5     | 4.166712755   | 1.760672383 | 0 0.980760089 |
| C19orf60        | C19orf60      | 2794.82258  | 1905.047518   |
| 2337.166046     | 2386.189296   |             |               |

|              |              |             |             |             |             |
|--------------|--------------|-------------|-------------|-------------|-------------|
| ASXL1        | ASXL1        | 2301.067119 | 5533.793299 | 2417.450375 |             |
| 2832.435136  |              |             |             |             |             |
| EMC8         | EMC8         | 3743.79141  | 2563.538989 | 2846.748528 |             |
| 2452.880982  |              |             |             |             |             |
| CD247        | CD247        | 13324.10571 | 13903.14947 | 13057.3542  |             |
| 12094.73341  |              |             |             |             |             |
| ZNF230       | ZNF230       | 267.7112945 | 246.4941336 | 637.8143979 |             |
| 395.2463157  |              |             |             |             |             |
| TRPC6        | TRPC6        | 1.041678189 | 0           | 0           | 0           |
| PCNXL3       | PCNXL3       | 544.7976927 | 1633.903971 | 880.8975076 |             |
| 811.0885933  |              |             |             |             |             |
| BRSK1        | BRSK1        | 3.125034566 | 29.93143051 | 5.575300681 |             |
| 2.942280266  |              |             |             |             |             |
| FAR1         | FAR1         | 5072.972779 | 4594.474583 | 3701.999652 |             |
| 3443.448671  |              |             |             |             |             |
| CCDC88B      | CCDC88B      | 5147.973609 | 5695.775159 | 3185.726809 |             |
| 4636.052939  |              |             |             |             |             |
| SLC04C1      | SLC04C1      | 42.70880574 | 26.41008574 | 2.230120273 |             |
| 4.903800443  |              |             |             |             |             |
| F8A2         | F8A2         | 578.1313947 | 617.9960064 | 645.6198189 |             |
| 815.9923938  |              |             |             |             |             |
| RBM47        | RBM47        | 177.0852921 | 238.5711079 | 107.0457731 |             |
| 122.5950111  |              |             |             |             |             |
| USP46        | USP46        | 815.6340218 | 437.5270871 | 673.4963223 |             |
| 370.7273135  |              |             |             |             |             |
| OSER1-AS1    | OSER1-AS1    |             | 54.16726581 | 116.2043773 |             |
| 558.6451283  | 300.1125871  |             |             |             |             |
| LOC100507194 | LOC100507194 |             | 0           | 0           | 1.115060136 |
| LOC100507091 | LOC100507091 |             | 5.208390943 | 9.683698106 | 0           |
| 14.49578177  | 6.865320621  |             |             |             |             |
| LOC100506844 | LOC100506844 |             | 672.9241099 | 740.362737  |             |
| 652.3101797  | 492.3415645  |             |             |             |             |
| LOC100507557 | LOC100507557 |             | 125.0013826 | 177.8279107 |             |
| 163.91384    | 200.0750581  |             |             |             |             |
| LINC01364    | LINC01364    |             | 0           | 0           | 3.345180409 |
| 0.980760089  |              |             |             |             |             |
| ATP6V0E2-AS1 | ATP6V0E2-AS1 |             | 132.29313   | 134.6914373 |             |
| 239.7379293  | 166.7292151  |             |             |             |             |
| ADCY10P1     | ADCY10P1     |             | 19.79188559 | 19.36739621 |             |
| 50.17770613  | 44.13420399  |             |             |             |             |
| C5orf27      | C5orf27      | 0           | 0           | 1.961520177 |             |
| EGFL6        | EGFL6        | 575.0063602 | 82.751602   | 134.9222765 |             |
| 72.57624656  |              |             |             |             |             |
| RNF44        | RNF44        | 277.0863982 | 695.4655912 | 305.5264773 |             |
| 271.6705446  |              |             |             |             |             |
| TBC1D30      | TBC1D30      | 101.0427843 | 102.9993344 | 34.56686422 |             |
| 37.26888337  |              |             |             |             |             |
| XK           | XK           | 2.083356377 | 0           | 0           | 1.961520177 |
| B3GALT1      | B3GALT1      | 0           | 0           | 5.575300681 | 0           |
| ARFIP1       | ARFIP1       | 1528.141903 | 1549.391697 | 1233.256511 |             |

|                 |               |               |             |   |  |
|-----------------|---------------|---------------|-------------|---|--|
| 1475.063173     |               |               |             |   |  |
| MYH6 MYH6       | 33.33370204   | 33.45277527   | 24.531323   |   |  |
| 88.26840798     |               |               |             |   |  |
| MYH3 MYH3       | 36.4587366    | 82.751602     | 2.230120273 |   |  |
| 87.28764789     |               |               |             |   |  |
| POLR2B POLR2B   | 12151.17607   | 12181.21188   | 11680.25493 |   |  |
| 12924.45645     |               |               |             |   |  |
| TAGLN TAGLN     | 18.7502074    | 17.60672383   | 18.95602232 |   |  |
| 16.67292151     |               |               |             |   |  |
| TGFBR3L TGFBR3L | 12.50013826   | 53.70050768   | 13.38072164 |   |  |
| 32.36508293     |               |               |             |   |  |
| ISM1 ISM1       | 0 0.880336191 | 109.2758934   | 55.90332505 |   |  |
| MIR4444-1       | MIR4444-1     | 319.7952039   | 399.6726309 |   |  |
| 328.9427402     | 325.6123494   |               |             |   |  |
| EFEMP2 EFEMP2   | 23.95859834   | 66.02521436   | 64.6734879  |   |  |
| 61.78788559     |               |               |             |   |  |
| WTH3DI WTH3DI   | 1.041678189   | 1.760672383   | 1.115060136 | 0 |  |
| DARS DARS       | 11305.33338   | 10661.75161   | 12622.48074 |   |  |
| 14967.37971     |               |               |             |   |  |
| RSPH10B2        | RSPH10B2      | 6.250069132   | 3.521344766 |   |  |
| 10.03554123     | 8.826840798   |               |             |   |  |
| CFAP69 CFAP69   | 2.083356377   | 0 0           | 0.980760089 |   |  |
| CLHC1 CLHC1     | 65.62572589   | 95.07630868   | 99.24035213 |   |  |
| 113.7681703     |               |               |             |   |  |
| IFITM1 IFITM1   | 11112.62292   | 9294.589509   | 54242.10033 |   |  |
| 23486.26184     |               |               |             |   |  |
| RPS16 RPS16     | 12519.93015   | 13089.71883   | 12124.04886 |   |  |
| 11197.33793     |               |               |             |   |  |
| WDFY2 WDFY2     | 1802.103266   | 1025.591663   | 1310.19566  |   |  |
| 1109.23966      |               |               |             |   |  |
| CHRNA2 CHRNA2   | 2.083356377   | 0 40.14216491 | 10.78836098 |   |  |
| MORF4L1 MORF4L1 | 13964.7378    | 14669.92229   | 14547.07454 |   |  |
| 13858.14005     |               |               |             |   |  |
| ICE1 ICE1       | 1935.438075   | 3292.457356   | 2564.638313 |   |  |
| 2605.879556     |               |               |             |   |  |
| EXOC3 EXOC3     | 3726.082881   | 3162.1676     | 3289.427402 |   |  |
| 2936.395705     |               |               |             |   |  |
| RCOR1 RCOR1     | 209.3773159   | 495.6292758   | 235.2776888 |   |  |
| 218.7094998     |               |               |             |   |  |
| NRG1-IT1        | NRG1-IT1      | 0 0           | 2.230120273 |   |  |
| 3.923040355     |               |               |             |   |  |
| CCL25 CCL25     | 23.95859834   | 4.401680957   | 55.75300681 |   |  |
| 7.846080709     |               |               |             |   |  |
| ZP2 ZP2         | 0 1.760672383 | 0             | 0.980760089 |   |  |
| BSN BSN         | 2.083356377   | 11.44437049   | 35.68192436 |   |  |
| 7.846080709     |               |               |             |   |  |
| B3GNT5 B3GNT5   | 103.1261407   | 55.46118006   | 40.14216491 |   |  |
| 135.3448922     |               |               |             |   |  |
| ANKRD11 ANKRD11 | 3764.624974   | 3873.479242   | 4386.646576 |   |  |
| 4038.770045     |               |               |             |   |  |



|             |           |             |             |             |             |   |
|-------------|-----------|-------------|-------------|-------------|-------------|---|
| ZNF25       | ZNF25     | 640.632086  | 576.6202054 | 1039.236047 |             |   |
| 903.2800417 |           |             |             |             |             |   |
| C1orf137    | C1orf137  |             | 1.041678189 | 0           | 0           | 0 |
| KIAA1875    | KIAA1875  |             | 0           | 14.96571525 | 8.92048109  |   |
|             |           | 20.59596186 |             |             |             |   |
| BRAT1       | BRAT1     | 6884.451149 | 5737.15096  | 4092.2707   |             |   |
| 5861.02229  |           |             |             |             |             |   |
| HIBADH      | HIBADH    | 2155.232172 | 2071.431058 | 1981.461862 |             |   |
| 2778.493331 |           |             |             |             |             |   |
| ARL11       | ARL11     | 114.5846008 | 139.0931182 | 160.5686596 |             |   |
| 79.44156718 |           |             |             |             |             |   |
| CPO         | CPO       | 4.166712755 | 0           | 0           | 0           |   |
| OR10P1      | OR10P1    | 4.166712755 | 2.641008574 | 11.15060136 |             |   |
| 4.903800443 |           |             |             |             |             |   |
| MRPL44      | MRPL44    | 2897.948721 | 2579.385041 | 2641.577463 |             |   |
| 2360.689533 |           |             |             |             |             |   |
| KRCC1       | KRCC1     | 1766.686208 | 1099.539903 | 1747.299234 |             |   |
| 1469.178613 |           |             |             |             |             |   |
| BLOC1S6     | BLOC1S6   | 3121.909532 | 3386.653328 | 3842.49723  |             |   |
| 3829.868146 |           |             |             |             |             |   |
| ELM01-AS1   | ELM01-AS1 |             | 969.8023937 | 949.8827506 |             |   |
| 893.1631691 |           | 1010.182891 |             |             |             |   |
| SYNJ2-IT1   | SYNJ2-IT1 |             | 1.041678189 | 0           | 0           | 0 |
| OTOP3       | OTOP3     | 0           | 1.760672383 | 0           | 0           |   |
| R3HDM1      | R3HDM1    | 2471.902342 | 3251.961891 | 2053.940771 |             |   |
| 2398.939177 |           |             |             |             |             |   |
| SPTBN2      | SPTBN2    | 3.125034566 | 2.641008574 | 1.115060136 |             | 0 |
| TPPP        | TPPP      | 15.62517283 | 27.29042193 | 51.29276627 |             |   |
| 26.48052239 |           |             |             |             |             |   |
| TOPBP1      | TOPBP1    | 6322.986605 | 9541.963979 | 4259.529721 |             |   |
| 5898.291173 |           |             |             |             |             |   |
| DUSP14      | DUSP14    | 1839.603681 | 1208.701591 | 1797.47694  |             |   |
| 1330.89144  |           |             |             |             |             |   |
| SRSF1       | SRSF1     | 11417.83463 | 21046.19733 | 9518.153323 |             |   |
| 11132.60777 |           |             |             |             |             |   |
| ZNF346      | ZNF346    | 2319.817326 | 1907.688527 | 1752.874534 |             |   |
| 2075.288348 |           |             |             |             |             |   |
| ITGB1BP2    | ITGB1BP2  |             | 5.208390943 | 44.01680957 |             |   |
| 12.2656615  |           | 10.78836098 |             |             |             |   |
| SLFN12      | SLFN12    | 494.7971396 | 440.1680957 | 259.8090118 |             |   |
| 244.2092621 |           |             |             |             |             |   |
| MYOZ2       | MYOZ2     | 1.041678189 | 0           | 0           | 0           |   |
| PLA2G4A     | PLA2G4A   | 186.4603958 | 39.61512861 | 20.07108245 |             |   |
| 11.76912106 |           |             |             |             |             |   |
| CLDN22      | CLDN22    | 0           | 0           | 20.07108245 | 0           |   |
| LOC729296   | LOC729296 |             | 1.041678189 | 0           | 0           | 0 |
| GALNS       | GALNS     | 964.5940027 | 915.5496391 | 650.0800594 |             |   |
| 970.9524878 |           |             |             |             |             |   |
| TMEM221     | TMEM221   | 0           | 11.44437049 | 7.805420954 | 12.74988115 |   |
| COG4        | COG4      | 4782.344564 | 4626.166686 | 3329.569567 |             |   |

|              |              |             |             |             |             |
|--------------|--------------|-------------|-------------|-------------|-------------|
| 4397.728238  |              |             |             |             |             |
| IKBKE        | IKBKE        | 12949.10156 | 7173.859624 | 4605.198363 |             |
| 4674.302583  |              |             |             |             |             |
| SH3TC1       | SH3TC1       | 673.9657881 | 1836.381295 | 409.22707   |             |
| 1455.447972  |              |             |             |             |             |
| STAG1        | STAG1        | 4112.545489 | 4106.768333 | 3853.647831 |             |
| 4241.787383  |              |             |             |             |             |
| ARHGEF5      | ARHGEF5      | 79.16754234 | 104.7600068 | 97.01023186 |             |
| 95.1337286   |              |             |             |             |             |
| ZDHHC1       | ZDHHC1       | 17.70852921 | 18.48706002 | 8.92048109  |             |
| 41.19192372  |              |             |             |             |             |
| IER5         | IER5         | 6705.282501 | 3966.794879 | 6530.907218 |             |
| 4691.956264  |              |             |             |             |             |
| CLEC2A       | CLEC2A       | 0           | 0           | 2.942280266 |             |
| TSSC1        | TSSC1        | 3179.201832 | 2474.625034 | 2082.932335 |             |
| 2630.398558  |              |             |             |             |             |
| NR6A1        | NR6A1        | 38.54209298 | 21.12806859 | 50.17770613 |             |
| 28.44204257  |              |             |             |             |             |
| GMDS         | GMDS         | 1465.641212 | 1191.975203 | 1138.476399 |             |
| 1263.218994  |              |             |             |             |             |
| TCEANC2      | TCEANC2      | 1333.348082 | 1106.582593 | 1226.56615  |             |
| 1181.815907  |              |             |             |             |             |
| PYDC1        | PYDC1        | 0           | 0           | 1.961520177 |             |
| AP4E1        | AP4E1        | 1232.305297 | 1763.313391 | 1389.36493  |             |
| 1362.275763  |              |             |             |             |             |
| NCR3LG1      | NCR3LG1      | 22.91692015 | 16.72638764 | 305.5264773 |             |
| 89.24916807  |              |             |             |             |             |
| ACACB        | ACACB        | 84.37593328 | 415.5186824 | 200.7108245 |             |
| 246.1707823  |              |             |             |             |             |
| TYROBP       | TYROBP       | 5.208390943 | 3.521344766 | 20.07108245 |             |
| 1.961520177  |              |             |             |             |             |
| AEN          | AEN          | 7735.502229 | 3367.285932 | 9960.832197 |             |
| 4555.630612  |              |             |             |             |             |
| TAS2R4       | TAS2R4       | 0           | 0           | 6.690360818 | 0.980760089 |
| POLA1        | POLA1        | 2407.318294 | 3633.147462 | 1843.194405 |             |
| 2437.18882   |              |             |             |             |             |
| SIX2         | SIX2         | 0           | 0.880336191 | 0           | 0.980760089 |
| LOC101927740 | LOC101927740 | 0           | 0           | 2.230120273 | 0           |
| EFCAB14      | EFCAB14      | 9143.85114  | 8227.622045 | 10599.76166 |             |
| 9059.280939  |              |             |             |             |             |
| COBL         | COBL         | 0           | 0           | 2.942280266 |             |
| TTC19        | TTC19        | 3690.665823 | 3082.057006 | 4053.243595 |             |
| 3602.331806  |              |             |             |             |             |
| DYRK3        | DYRK3        | 584.3814639 | 641.7650836 | 446.0240545 |             |
| 457.0342013  |              |             |             |             |             |
| C12orf79     | C12orf79     |             | 43.75048393 | 24.64941336 |             |
| 424.8379119  | 289.3242262  |             |             |             |             |
| GUCD1        | GUCD1        | 7536.541695 | 8129.904728 | 6951.284889 |             |
| 7786.254344  |              |             |             |             |             |
| EPB41L4A-AS1 | EPB41L4A-AS1 |             | 189.5854303 | 173.4262297 |             |

|                 |               |  |             |             |
|-----------------|---------------|--|-------------|-------------|
| 394.7312882     | 272.6513047   |  |             |             |
| LINC01358       | LINC01358     |  | 91.66768061 | 113.5633687 |
| 82.51445008     | 49.03800443   |  |             |             |
| GNRHR GNRHR     | 13.54181645   |  | 19.36739621 | 21.18614259 |
| 7.846080709     |               |  |             |             |
| RGMB RGMB       | 28.12531109   |  | 38.73479242 | 314.4469584 |
| 81.40308736     |               |  |             |             |
| CHAC2 CHAC2     | 2403.151581   |  | 1599.57086  | 1344.762524 |
| 1265.180514     |               |  |             |             |
| CCNA2 CCNA2     | 19168.96203   |  | 18971.24493 | 9902.84907  |
| 13529.58542     |               |  |             |             |
| WDR11-AS1       | WDR11-AS1     |  | 8.33342551  | 14.96571525 |
| 14.49578177     | 6.865320621   |  |             |             |
| VAV2 VAV2       | 369.795757    |  | 390.869269  | 396.9614085 |
| 433.4959592     |               |  |             |             |
| TMEM86A TMEM86A | 45.8338403    |  | 53.70050768 | 103.7005927 |
| 45.11496408     |               |  |             |             |
| LINC00167       | LINC00167     |  | 57.29230038 | 28.17075813 |
| 82.51445008     | 46.09572417   |  |             |             |
| CNGB3 CNGB3     | 0 0           |  | 1.115060136 | 0           |
| NSUN3 NSUN3     | 1092.72042    |  | 694.585255  | 921.0396726 |
| 795.3964319     |               |  |             |             |
| ZNF561 ZNF561   | 708.3411683   |  | 678.7392036 | 1136.246279 |
| 1033.721133     |               |  |             |             |
| SRGAP2C SRGAP2C | 643.7571206   |  | 705.1492893 | 547.4945269 |
| 439.3805197     |               |  |             |             |
| ZNF449 ZNF449   | 209.3773159   |  | 159.3408507 | 327.8276801 |
| 282.4589055     |               |  |             |             |
| ZCCHC5 ZCCHC5   | 0 1.760672383 |  | 0           | 0           |
| SAMD9L SAMD9L   | 10098.02836   |  | 5900.893491 | 11301.13448 |
| 5722.735117     |               |  |             |             |
| NUP107 NUP107   | 10737.61877   |  | 8763.746786 | 7717.331203 |
| 9200.510392     |               |  |             |             |
| TADA2B TADA2B   | 346.8788368   |  | 432.24507   | 357.9343037 |
| 220.67102       |               |  |             |             |
| KAZALD1 KAZALD1 | 6.250069132   |  | 5.282017149 | 4.460240545 |
| 1.961520177     |               |  |             |             |
| MSL2 MSL2       | 1960.438351   |  | 3057.407593 | 3037.423811 |
| 2919.722784     |               |  |             |             |
| PNP0 PNP0       | 4162.546042   |  | 3217.62878  | 3567.077376 |
| 3989.732041     |               |  |             |             |
| TMEM176A        | TMEM176A      |  | 0 0         | 4.460240545 |
| 2.942280266     |               |  |             |             |
| SPEF2 SPEF2     | 61.45901313   |  | 80.11059342 | 214.0915462 |
| 201.0558182     |               |  |             |             |
| HPDL HPDL       | 505.2139215   |  | 476.2618796 | 480.5909187 |
| 611.9942953     |               |  |             |             |
| NUTM2D NUTM2D   | 8.33342551    |  | 0.880336191 | 4.460240545 |
| SOX2-OT SOX2-OT | 3.125034566   |  | 1.760672383 | 18.95602232 |
| 0.980760089     |               |  |             | 0           |

|           |           |             |             |             |             |             |
|-----------|-----------|-------------|-------------|-------------|-------------|-------------|
| MIR6822   | MIR6822   | 0           | 0           | 1.115060136 | 0           |             |
| MIR5588   | MIR5588   | 0           | 1.760672383 | 0           | 0           |             |
| SYNGR2    | SYNGR2    | 17476.23497 |             | 10225.9852  |             | 13743.11618 |
|           |           | 13426.60561 |             |             |             |             |
| TNFRSF11B | TNFRSF11B |             | 0           | 0           | 7.805420954 | 0           |
| FAM127B   | FAM127B   | 459.3800812 |             | 633.8420578 |             | 684.6469237 |
|           |           | 817.9539139 |             |             |             |             |
| PRR22     | PRR22     | 44.79216211 |             | 56.34151625 |             | 32.33674395 |
|           |           | 43.1534439  |             |             |             |             |
| ZNF277    | ZNF277    | 506.2555997 |             | 527.3213787 |             | 783.8872758 |
|           |           | 628.6672168 |             |             |             |             |
| EPS8L1    | EPS8L1    | 14.58349464 |             | 72.1875677  |             | 15.61084191 |
|           |           | 37.26888337 |             |             |             |             |
| NUDCD2    | NUDCD2    | 3962.54383  |             | 5099.787557 |             | 3270.47138  |
|           |           | 4583.091894 |             |             |             |             |
| FAM222A   | FAM222A   | 62.50069132 |             | 58.10218863 |             | 138.2674569 |
|           |           | 61.78788559 |             |             |             |             |
| ZNF587    | ZNF587    | 690.6326391 |             | 637.3634026 |             | 818.45414   |
|           |           | 796.377192  |             |             |             |             |
| ATOH8     | ATOH8     | 5.208390943 |             | 9.683698106 | 0           | 7.846080709 |
| TMEM87B   | TMEM87B   | 1209.388377 |             | 1978.115422 |             | 1437.312516 |
|           |           | 1451.524931 |             |             |             |             |
| UBALD1    | UBALD1    | 148.959981  |             | 311.6390118 |             | 122.656615  |
|           |           | 194.1904976 |             |             |             |             |
| ASRGL1    | ASRGL1    | 541.6726581 |             | 455.133811  |             | 359.0493639 |
|           |           | 203.9980984 |             |             |             |             |
| AIFM2     | AIFM2     | 1610.43448  |             | 1390.931182 |             | 1200.919767 |
|           |           | 1048.432535 |             |             |             |             |
| CIRH1A    | CIRH1A    | 13375.14794 |             | 7474.054265 |             | 10924.24416 |
|           |           | 10500.01751 |             |             |             |             |
| TIPIN     | TIPIN     | 3710.457708 |             | 3245.799538 |             | 2449.787119 |
|           |           | 2793.204733 |             |             |             |             |
| TXNL4B    | TXNL4B    | 2319.817326 |             | 1510.656905 |             | 2311.519662 |
|           |           | 1736.926117 |             |             |             |             |
| PRPF38B   | PRPF38B   | 2803.156006 |             | 3384.892656 |             | 3264.896079 |
|           |           | 3017.798793 |             |             |             |             |
| IARS2     | IARS2     | 9577.189267 |             | 8832.413009 |             | 7310.334253 |
|           |           | 9381.951008 |             |             |             |             |
| SUPT16H   | SUPT16H   | 23021.08797 |             | 19845.41876 |             | 19092.05965 |
|           |           | 22023.94855 |             |             |             |             |
| PPP1R13B  | PPP1R13B  |             |             | 192.7104649 |             | 326.604727  |
|           |           | 516.2728431 |             | 453.111161  |             |             |
| TMEM186   | TMEM186   | 993.760992  |             | 1046.719732 |             | 1000.208942 |
|           |           | 1109.23966  |             |             |             |             |
| CNDP1     | CNDP1     | 0           | 2.641008574 | 0           | 7.846080709 |             |
| RAPSN     | RAPSN     | 6.250069132 |             | 0.880336191 |             | 1.115060136 |
|           |           | 4.903800443 |             |             |             |             |
| WNT5B     | WNT5B     | 316.6701694 |             | 1120.667972 |             | 12.2656615  |
|           |           | 537.4565286 |             |             |             |             |
| SLC41A1   | SLC41A1   | 1344.806542 |             | 1811.731882 |             | 2426.370857 |

|              |              |             |             |             |             |             |
|--------------|--------------|-------------|-------------|-------------|-------------|-------------|
| 1984.077659  |              |             |             |             |             |             |
| FAM227B      | FAM227B      | 182.293683  |             | 166.3835402 |             | 236.3927489 |
| 201.0558182  |              |             |             |             |             |             |
| NPAS4        | NPAS4        | 0           | 0.880336191 | 0           | 0           |             |
| LPPR3        | LPPR3        | 0           | 0           | 0           | 4.903800443 |             |
| LOC100144595 | LOC100144595 | 0           | 0           | 0           | 0           | 1.115060136 |
| PLEKHH2      | PLEKHH2      | 28.12531109 |             | 24.64941336 |             | 14.49578177 |
| 54.92256497  |              |             |             |             |             |             |
| ZAR1         | ZAR1         | 0           | 0           | 0           | 1.961520177 |             |
| HERPUD2      | HERPUD2      | 2277.10852  |             | 2398.035785 |             | 3458.916543 |
| 2677.475042  |              |             |             |             |             |             |
| CRIM1        | CRIM1        | 56.25062219 |             | 153.1784973 |             | 101.4704724 |
| 73.55700665  |              |             |             |             |             |             |
| SIRT7        | SIRT7        | 2573.986804 |             | 1846.064993 |             | 2050.595591 |
| 2056.653906  |              |             |             |             |             |             |
| ANKRD20A4    | ANKRD20A4    |             |             | 4.166712755 |             | 16.72638764 |
| 13.38072164  | 8.826840798  |             |             |             |             |             |
| APLN         | APLN         | 0           | 0           | 0           | 17.6536816  |             |
| COL5A1       | COL5A1       | 1.041678189 |             | 2.641008574 | 0           | 21.57672195 |
| ZMYND12      | ZMYND12      | 6.250069132 |             | 29.05109432 |             | 85.85963049 |
| 34.3266031   |              |             |             |             |             |             |
| TMEM14C      | TMEM14C      | 2756.280487 |             | 3565.361575 |             | 2954.909361 |
| 3515.044158  |              |             |             |             |             |             |
| G6PC3        | G6PC3        | 1106.262236 |             | 1346.914373 |             | 1214.300488 |
| 1187.700467  |              |             |             |             |             |             |
| FRG1B        | FRG1B        | 332.2953422 |             | 789.6615637 |             | 492.8565802 |
| 733.6085463  |              |             |             |             |             |             |
| HOXB-AS3     | HOXB-AS3     |             |             | 8.33342551  |             | 12.32470668 |
| 7.805420954  | 4.903800443  |             |             |             |             |             |
| PITPNA-AS1   | PITPNA-AS1   |             |             | 422.9213446 |             | 390.869269  |
| 471.6704376  | 393.2847956  |             |             |             |             |             |
| DTL          | DTL          | 9961.568519 |             | 10618.61514 |             | 5605.407305 |
| 7009.492354  |              |             |             |             |             |             |
| CEP170P1     | CEP170P1     |             |             | 1.041678189 | 0           | 0           |
| 2.942280266  |              |             |             |             |             |             |
| SLC25A5-AS1  | SLC25A5-AS1  |             |             | 5791.730729 |             | 4504.680292 |
| 3894.905056  | 4413.420399  |             |             |             |             |             |
| TSNAX-DISC1  | TSNAX-DISC1  |             |             | 1734.394184 |             | 1521.220939 |
| 2171.022085  | 1864.424929  |             |             |             |             |             |
| CYP2B7P      | CYP2B7P      | 0           | 0.880336191 | 0           |             | 7.846080709 |
| MRPS27       | MRPS27       | 6084.4423   |             | 4117.332367 |             | 5143.772409 |
| 5036.203055  |              |             |             |             |             |             |
| FCRLB        | FCRLB        | 9.375103698 |             | 5.282017149 |             | 17.84096218 |
| 10.78836098  |              |             |             |             |             |             |
| GRASP        | GRASP        | 54.16726581 |             | 22.88874098 |             | 245.31323   |
| 157.9023743  |              |             |             |             |             |             |
| GPR176       | GPR176       | 0           | 7.923025723 | 16.72590204 |             | 11.76912106 |
| PDE1A        | PDE1A        | 1.041678189 | 0           | 0           |             | 2.942280266 |
| TMEM200B     | TMEM200B     |             |             | 95.83439336 |             | 305.4766584 |
| 210.7463658  | 205.9596186  |             |             |             |             |             |

|              |              |               |             |               |
|--------------|--------------|---------------|-------------|---------------|
| HMGXB4       | HMGXB4       | 1418.765693   | 1715.775237 | 1355.913126   |
| 1309.314718  |              |               |             |               |
| PRRG4        | PRRG4        | 237.502627    | 286.1092622 | 157.2234792   |
| 93.17220842  |              |               |             |               |
| UNC5A        | UNC5A        | 6.250069132   | 14.08537906 | 0 1.961520177 |
| PAQR8        | PAQR8        | 1052.094971   | 601.2696188 | 2825.562385   |
| 1777.137281  |              |               |             |               |
| TWISTNB      | TWISTNB      | 3590.664716   | 3330.311812 | 3277.16174    |
| 3405.199028  |              |               |             |               |
| FAM102B      | FAM102B      | 667.715719    | 588.9449121 | 1262.248074   |
| 865.0303982  |              |               |             |               |
| PROX1        | PROX1        | 5.208390943   | 0.880336191 | 0 2.942280266 |
| OR3A2        | OR3A2        | 75.00082959   | 44.89714576 | 44.60240545   |
| 44.13420399  |              |               |             |               |
| LRP6         | LRP6         | 25.00027653   | 95.95664487 | 198.4807043   |
| 290.3049862  |              |               |             |               |
| KRBOX1       | KRBOX1       | 1.041678189   | 5.282017149 | 12.2656615    |
| 4.903800443  |              |               |             |               |
| CYBA         | CYBA         | 16837.68624   | 16665.64444 | 6898.877063   |
| 10665.76596  |              |               |             |               |
| TPD52L1      | TPD52L1      | 0 1.760672383 | 23.41626286 | 41.19192372   |
| PDZD3        | PDZD3        | 0 4.401680957 | 0           | 4.903800443   |
| DSPP         | DSPP         | 2.083356377   | 0 0         | 0             |
| CHCHD3       | CHCHD3       | 5626.103897   | 4147.263798 | 4321.973088   |
| 4564.457453  |              |               |             |               |
| ZNF34        | ZNF34        | 326.0452731   | 169.0245488 | 470.5553775   |
| 355.0351521  |              |               |             |               |
| CYB5B        | CYB5B        | 11567.83629   | 10949.62155 | 7265.731848   |
| 8789.571915  |              |               |             |               |
| MAP6         | MAP6         | 48.95887487   | 159.3408507 | 6.690360818   |
| 8.826840798  |              |               |             |               |
| RAI1         | RAI1         | 248.9610871   | 838.0800542 | 684.6469237   |
| 668.8783805  |              |               |             |               |
| C1orf74      | C1orf74      | 368.7540788   | 345.091787  | 446.0240545   |
| 378.5733942  |              |               |             |               |
| ZNF569       | ZNF569       | 653.1322243   | 451.6124662 | 853.0210042   |
| 543.3410891  |              |               |             |               |
| LOC101926935 | LOC101926935 | 1.041678189   | 5.282017149 |               |
| 103.7005927  | 13.73064124  |               |             |               |
| LINC00087    | LINC00087    | 0             | 3.521344766 | 5.575300681   |
| 6.865320621  |              |               |             |               |
| FAM110C      | FAM110C      | 88.54264604   | 455.133811  | 16.72590204   |
| 55.90332505  |              |               |             |               |
| ZMAT1        | ZMAT1        | 26.04195472   | 12.32470668 | 124.8867353   |
| 146.1332532  |              |               |             |               |
| ARG1         | ARG1         | 7.291747321   | 2.641008574 | 1.115060136   |
| 5.884560532  |              |               |             |               |
| PPP1R3B      | PPP1R3B      | 288.5448583   | 716.5936598 | 558.6451283   |
| 1073.932297  |              |               |             |               |
| APOC1        | APOC1        | 2.083356377   | 5.282017149 | 6.690360818   |

|                    |                    |               |             |  |
|--------------------|--------------------|---------------|-------------|--|
| 1.961520177        |                    |               |             |  |
| DHODH DHODH        | 1328.139691        | 775.5761847   | 973.447499  |  |
| 1155.335384        |                    |               |             |  |
| C6orf147           | C6orf147           | 277.0863982   | 378.5445623 |  |
| 150.5331184        | 223.6133002        |               |             |  |
| OVCH1 OVCH1        | 38.54209298        | 42.25613719   | 8.92048109  |  |
| 27.46128248        |                    |               |             |  |
| RINL RINL          | 2660.446094        | 2702.632108   | 2075.126914 |  |
| 3007.010432        |                    |               |             |  |
| CBLN2 CBLN2        | 0 0                | 0 0.980760089 |             |  |
| SRPK2 SRPK2        | 2104.189941        | 2268.626365   | 1684.855866 |  |
| 1562.350821        |                    |               |             |  |
| PTGER4P2-CDK2AP2P2 | PTGER4P2-CDK2AP2P2 | 0             | 7.042689532 |  |
| 0                  | 0.980760089        |               |             |  |
| LINC00598          | LINC00598          | 4.166712755   | 1.760672383 |  |
| 1.115060136        | 4.903800443        |               |             |  |
| HLCS HLCS          | 564.5895783        | 688.4229017   | 836.2951022 |  |
| 932.7028443        |                    |               |             |  |
| RABGGTB RABGGTB    | 1502.099948        | 1284.410503   | 1633.5631   |  |
| 1479.966974        |                    |               |             |  |
| DNLZ DNLZ          | 1058.34504         | 384.7069157   | 1255.557713 |  |
| 581.5907326        |                    |               |             |  |
| RAB13 RAB13        | 15.62517283        | 116.2043773   | 75.82408927 |  |
| 81.40308736        |                    |               |             |  |
| LOC391322          | LOC391322          | 45.8338403    | 89.79429153 |  |
| 52.4078264         | 167.7099752        |               |             |  |
| SLC25A39           | SLC25A39           | 10091.77829   | 7281.260639 |  |
| 8019.5125          | 8894.513244        |               |             |  |
| RPP25L RPP25L      | 969.8023937        | 1069.608473   | 925.4999131 |  |
| 1193.585028        |                    |               |             |  |
| ALOX15 ALOX15      | 2.083356377        | 0.880336191   | 0 0         |  |
| CEP57 CEP57        | 4550.050328        | 4553.979118   | 3997.490589 |  |
| 4681.167903        |                    |               |             |  |
| PTGIS PTGIS        | 1331.264725        | 1429.665975   | 120.4264947 |  |
| 256.9591432        |                    |               |             |  |
| TBXA2R TBXA2R      | 136.4598427        | 147.8964802   | 27.87650341 |  |
| 51.9802847         |                    |               |             |  |
| ARID1B ARID1B      | 1189.596491        | 2925.357164   | 1700.466708 |  |
| 2151.787635        |                    |               |             |  |
| COMMD8 COMMD8      | 3203.16043         | 2574.98336    | 2736.357574 |  |
| 2491.130625        |                    |               |             |  |
| VPS8 VPS8          | 2876.073479        | 3155.12491    | 2367.272669 |  |
| 2476.419224        |                    |               |             |  |
| GOLGA8H GOLGA8H    | 30.20866747        | 20.2477324    | 3.345180409 |  |
| 18.63444168        |                    |               |             |  |
| USH1G USH1G        | 1.041678189        | 0 0           | 0           |  |
| PDSS2 PDSS2        | 1355.223324        | 1106.582593   | 887.5878685 |  |
| 1213.20023         |                    |               |             |  |
| WDR45B WDR45B      | 3592.748073        | 2903.348759   | 3888.214695 |  |
| 3714.138456        |                    |               |             |  |

|              |              |             |             |             |             |
|--------------|--------------|-------------|-------------|-------------|-------------|
| CPXM1        | CPXM1        | 13.54181645 | 29.93143051 | 12.2656615  |             |
| 39.23040355  |              |             |             |             |             |
| FOS          | FOS          | 552.08944   | 334.5277527 | 860.8264252 |             |
| 1007.240611  |              |             |             |             |             |
| IL21         | IL21         | 63.54236951 | 358.2968299 | 121.5415549 |             |
| 276.574345   |              |             |             |             |             |
| SEPHS2       | SEPHS2       | 12559.51392 | 9252.333372 | 7959.299253 |             |
| 8671.880704  |              |             |             |             |             |
| FBX03        | FBX03        | 1893.770947 | 1346.034037 | 1910.098013 |             |
| 1733.983837  |              |             |             |             |             |
| TUT1         | TUT1         | 2794.82258  | 1823.176252 | 4155.829128 |             |
| 3131.566963  |              |             |             |             |             |
| SMIM10       | SMIM10       | 33.33370204 | 56.34151625 | 14.49578177 |             |
| 39.23040355  |              |             |             |             |             |
| ALDH1L2      | ALDH1L2      | 13.54181645 | 24.64941336 | 18.95602232 |             |
| 36.28812328  |              |             |             |             |             |
| GCNT4        | GCNT4        | 13.54181645 | 10.5640343  | 91.43493117 |             |
| 81.40308736  |              |             |             |             |             |
| TIMMDC1      | TIMMDC1      | 6012.566505 | 4790.789554 | 4427.903801 |             |
| 5014.626333  |              |             |             |             |             |
| ATF6         | ATF6         | 4755.260931 | 3626.104773 | 4869.467615 |             |
| 4753.74415   |              |             |             |             |             |
| SLC2A9       | SLC2A9       | 45.8338403  | 15.84605145 | 47.94758586 |             |
| 14.71140133  |              |             |             |             |             |
| SNORD116-2   | SNORD116-2   |             | 2.083356377 | 0.880336191 |             |
| 3.345180409  | 0.980760089  |             |             |             |             |
| SNORD116-1   | SNORD116-1   |             | 0           | 1.115060136 | 0           |
| IFITM5       | IFITM5       | 0           | 0           | 0.980760089 |             |
| SAMD5        | SAMD5        | 0           | 0           | 3.923040355 |             |
| NHLH2        | NHLH2        | 0           | 0           | 6.690360818 | 0.980760089 |
| PRPH2        | PRPH2        | 0           | 7.042689532 | 7.805420954 | 11.76912106 |
| PINK1        | PINK1        | 868.7596094 | 862.7294676 | 2281.413039 |             |
| 1532.928019  |              |             |             |             |             |
| CP           | CP           | 709.3828465 | 599.5089464 | 660.1156007 |             |
| 651.2246989  |              |             |             |             |             |
| 8-Mar        | 8-Mar        | 389.5876426 | 814.3109771 | 1671.475144 |             |
| 921.9144833  |              |             |             |             |             |
| LYPD3        | LYPD3        | 65.62572589 | 66.90555055 | 313.3318983 |             |
| 301.0933472  |              |             |             |             |             |
| CDK13        | CDK13        | 1839.603681 | 2313.523511 | 2455.36242  |             |
| 2233.190722  |              |             |             |             |             |
| TIMM10B      | TIMM10B      | 2393.776478 | 2290.63477  | 3960.693604 |             |
| 3263.969575  |              |             |             |             |             |
| DNAJB8-AS1   | DNAJB8-AS1   |             | 0           | 0.880336191 | 0           |
| LOC100506801 | LOC100506801 |             | 77.08418596 | 82.751602   |             |
| 78.05420954  | 107.8836098  |             |             |             |             |
| STX18-AS1    | STX18-AS1    |             | 68.75076045 | 98.59765344 |             |
| 65.78854804  | 160.8446545  |             |             |             |             |
| LINC01426    | LINC01426    |             | 1.041678189 | 0           | 16.72590204 |
| 3.923040355  |              |             |             |             |             |



|              |              |             |             |             |             |
|--------------|--------------|-------------|-------------|-------------|-------------|
| LOC100131047 | LOC100131047 | 0           | 0           | 2.230120273 | 0           |
| LOC728084    | LOC728084    | 40.62544936 |             | 8.803361914 |             |
| 3.345180409  | 3.923040355  |             |             |             |             |
| TXNRD3NB     | TXNRD3NB     | 6.250069132 |             | 24.64941336 |             |
| 47.94758586  | 52.96104479  |             |             |             |             |
| MAMDC2       | MAMDC2       | 0           | 1.760672383 | 0           | 4.903800443 |
| MAPKAPK2     | MAPKAPK2     | 166.6685102 |             | 1272.085797 |             |
| 168.3740806  | 196.1520177  |             |             |             |             |
| CATSPERB     | CATSPERB     | 7.291747321 |             | 13.20504287 |             |
| 6.690360818  | 12.74988115  |             |             |             |             |
| PLEKH01      | PLEKH01      | 2696.904831 | 2111.926523 | 2057.285951 |             |
| 1478.005454  |              |             |             |             |             |
| WEE1         | WEE1         | 5476.102238 | 5868.321052 | 3197.992471 |             |
| 4830.243437  |              |             |             |             |             |
| XP01         | XP01         | 6344.861847 | 13942.7646  | 8548.051005 |             |
| 8406.09472   |              |             |             |             |             |
| SNORD91B     | SNORD91B     | 2.083356377 |             | 0.880336191 | 0           |
| 2.942280266  |              |             |             |             |             |
| RPL13AP3     | RPL13AP3     | 0           | 2.641008574 | 10.03554123 |             |
| 0.980760089  |              |             |             |             |             |
| SNORD91A     | SNORD91A     | 6.250069132 |             | 7.042689532 |             |
| 6.690360818  | 2.942280266  |             |             |             |             |
| GTF2IRD1P1   | GTF2IRD1P1   | 431.2547701 |             | 658.4914712 |             |
| 613.2830749  | 696.339663   |             |             |             |             |
| SNORD90      | SNORD90      | 2.083356377 | 0.880336191 | 2.230120273 | 0           |
| SNORA37      | SNORA37      | 1.041678189 | 0           | 4.460240545 | 3.923040355 |
| SNORA36A     | SNORA36A     | 1.041678189 |             | 1.760672383 |             |
| 8.92048109   | 0.980760089  |             |             |             |             |
| SNORD89      | SNORD89      | 22.91692015 | 55.46118006 | 22.30120273 |             |
| 22.55748204  |              |             |             |             |             |
| SNORD88C     | SNORD88C     | 6.250069132 |             | 9.683698106 |             |
| 1.115060136  | 1.961520177  |             |             |             |             |
| SNORD88B     | SNORD88B     | 41.66712755 |             | 80.11059342 |             |
| 61.32830749  | 58.84560532  |             |             |             |             |
| S100P        | S100P        | 321.8785603 | 158.4605145 | 109.2758934 |             |
| 38.24964346  |              |             |             |             |             |
| S100A2       | S100A2       | 27.08363291 | 41.375801   | 6.690360818 |             |
| 40.21116364  |              |             |             |             |             |
| ZNF677       | ZNF677       | 67.70908227 | 39.61512861 | 192.9054036 |             |
| 150.0562936  |              |             |             |             |             |
| SLC26A8      | SLC26A8      | 7.291747321 | 7.923025723 | 7.805420954 |             |
| 2.942280266  |              |             |             |             |             |
| FAM154A      | FAM154A      | 1.041678189 | 0.880336191 | 0           | 12.74988115 |
| TRIM74       | TRIM74       | 5.208390943 | 9.683698106 | 5.575300681 |             |
| 8.826840798  |              |             |             |             |             |
| SIAH3        | SIAH3        | 1.041678189 | 3.521344766 | 18.95602232 |             |
| 19.61520177  |              |             |             |             |             |
| PHLDB3       | PHLDB3       | 176.0436139 | 126.7684116 | 316.6770787 |             |
| 171.6330155  |              |             |             |             |             |
| FUNDC1       | FUNDC1       | 964.5940027 | 615.3549978 | 871.9770266 |             |

|                 |               |             |             |            |
|-----------------|---------------|-------------|-------------|------------|
| 422.7075982     |               |             |             |            |
| FAM120A0S       | FAM120A0S     | 5002.138662 | 3466.763922 |            |
| 4019.791791     | 4115.269332   |             |             |            |
| APOBEC3A_B      | APOBEC3A_B    | 604.1733494 | 936.6777077 |            |
| 241.9680496     | 375.631114    |             |             |            |
| NOBOX NOBOX     | 0 2.641008574 | 0           | 0           |            |
| USP21 USP21     | 1719.81069    | 1857.509364 | 2042.79017  |            |
| 1912.482173     |               |             |             |            |
| UCK2 UCK2       | 7138.620627   | 6034.704592 | 4876.157976 |            |
| 5286.296878     |               |             |             |            |
| TXN2 TXN2       | 10302.19729   | 7715.266382 | 6891.071642 |            |
| 8154.039377     |               |             |             |            |
| GAS2L3 GAS2L3   | 42.70880574   | 46.65781815 | 37.91204463 |            |
| 27.46128248     |               |             |             |            |
| ST6GALNAC4      | ST6GALNAC4    | 762.5084341 | 968.3698106 |            |
| 737.0547501     | 774.80047     |             |             |            |
| TAS2R14 TAS2R14 | 15.62517283   | 22.88874098 | 18.95602232 |            |
| 23.53824213     |               |             |             |            |
| FERMT1 FERMT1   | 3.125034566   | 7.042689532 | 2.230120273 |            |
| 0.980760089     |               |             |             |            |
| BAP1 BAP1       | 1436.474222   | 3777.522597 | 1716.07755  |            |
| 1686.907353     |               |             |             |            |
| MLANA MLANA     | 5.208390943   | 22.00840479 | 6.690360818 |            |
| 17.6536816      |               |             |             |            |
| ANAPC4 ANAPC4   | 4430.257337   | 3050.364903 | 2789.880461 |            |
| 3461.102353     |               |             |             |            |
| ABL1 ABL1       | 971.8857501   | 2419.163854 | 1333.611923 |            |
| 1306.372438     |               |             |             |            |
| BAZ2B BAZ2B     | 582.2981075   | 557.2528092 | 709.1782467 |            |
| 674.762941      |               |             |             |            |
| LRRCC1 LRRCC1   | 410.4212063   | 850.4047609 | 371.3150254 |            |
| 692.4166226     |               |             |             |            |
| ZNF691 ZNF691   | 508.3389561   | 599.5089464 | 674.6113824 |            |
| 636.5132975     |               |             |             |            |
| ARHGEF38        | ARHGEF38      | 0           | 2.641008574 | 8.92048109 |
|                 | 2.942280266   |             |             |            |
| CDKAL1 CDKAL1   | 4193.796388   | 3067.971627 | 3642.901465 |            |
| 3244.354373     |               |             |             |            |
| TBC1D22B        | TBC1D22B      | 1334.38976  | 1677.040445 |            |
| 1189.769165     | 1095.509019   |             |             |            |
| GATAD2A GATAD2A | 3198.993717   | 4572.466178 | 3006.202127 |            |
| 3372.833945     |               |             |             |            |
| MIR1233-2       | MIR1233-2     | 1.041678189 | 0           | 0          |
| IFIH1 IFIH1     | 4516.716626   | 2360.181329 | 9577.25151  | 0          |
| 3755.33038      |               |             |             |            |
| XYLT2 XYLT2     | 1118.762375   | 1082.813515 | 1087.183633 |            |
| 707.1280239     |               |             |             |            |
| FAM208B FAM208B | 1621.89294    | 2256.301659 | 2678.374447 |            |
| 2115.499511     |               |             |             |            |
| MOSPD2 MOSPD2   | 1097.928811   | 1162.924109 | 1134.016159 |            |

|              |              |             |             |             |             |
|--------------|--------------|-------------|-------------|-------------|-------------|
| 1459.371012  |              |             |             |             |             |
| REG1A        | REG1A        | 1.041678189 | 0           | 5.575300681 | 0           |
| PEPD         | PEPD         | 3540.664163 | 2369.865027 | 4116.802023 |             |
| 3836.733467  |              |             |             |             |             |
| CCDC175      | CCDC175      | 83.3342551  | 54.58084387 | 57.98312709 |             |
| 56.88408514  |              |             |             |             |             |
| ATP2B1       | ATP2B1       | 1927.104649 | 1814.372891 | 2419.680496 |             |
| 2124.326352  |              |             |             |             |             |
| TAF8         | TAF8         | 1607.309445 | 1658.553385 | 1956.930539 |             |
| 1793.810202  |              |             |             |             |             |
| IRAK2        | IRAK2        | 1484.391419 | 1079.292171 | 655.6553601 |             |
| 845.4151964  |              |             |             |             |             |
| KCNV2        | KCNV2        | 0           | 0.880336191 | 0           | 1.961520177 |
| SRFBP1       | SRFBP1       | 1084.386994 | 840.7210628 | 1344.762524 |             |
| 1264.199754  |              |             |             |             |             |
| SSTR3        | SSTR3        | 125.0013826 | 262.340185  | 1198.689646 |             |
| 545.3026093  |              |             |             |             |             |
| MB           | MB           | 16.66685102 | 120.6060582 | 139.382517  |             |
| 344.2467911  |              |             |             |             |             |
| FBXL22       | FBXL22       | 23.95859834 | 16.72638764 | 81.39938995 |             |
| 32.36508293  |              |             |             |             |             |
| CDIPT        | CDIPT        | 3890.668035 | 3085.578351 | 3948.427943 |             |
| 3468.948434  |              |             |             |             |             |
| TASP1        | TASP1        | 845.8426892 | 633.8420578 | 834.0649819 |             |
| 807.165553   |              |             |             |             |             |
| LOC100131564 | LOC100131564 |             | 523.9641289 | 492.107931  |             |
| 734.8246298  | 842.4729162  |             |             |             |             |
| SLC22A9      | SLC22A9      | 0           | 0           | 1.961520177 |             |
| SUDS3        | SUDS3        | 2693.779796 | 2820.597157 | 2757.543717 |             |
| 2237.113762  |              |             |             |             |             |
| ARMCX1       | ARMCX1       | 17.70852921 | 19.36739621 | 49.062646   |             |
| 35.30736319  |              |             |             |             |             |
| OR1K1        | OR1K1        | 0           | 4.401680957 | 0           | 1.961520177 |
| MCMBP        | MCMBP        | 17581.44447 | 14833.66483 | 13118.6825  |             |
| 13769.87164  |              |             |             |             |             |
| MUC16        | MUC16        | 1.041678189 | 0.880336191 | 1.115060136 |             |
| 12.74988115  |              |             |             |             |             |
| KIAA0101     | KIAA0101     |             | 6755.283054 | 9641.441969 |             |
| 3245.940057  | 3868.11779   |             |             |             |             |
| EPHA7        | EPHA7        | 0           | 0           | 2.942280266 |             |
| NAT2         | NAT2         | 0           | 0           | 8.826840798 |             |
| XPOT         | XPOT         | 14329.32516 | 11280.62796 | 15439.12265 |             |
| 13030.37854  |              |             |             |             |             |
| LIN28A       | LIN28A       | 0           | 0.880336191 | 0           | 5.884560532 |
| OGFRL1       | OGFRL1       | 429.1714137 | 518.5180168 | 183.9849225 |             |
| 349.1505916  |              |             |             |             |             |
| TNFAIP8L2    | TNFAIP8L2    |             | 1708.352229 | 1362.760424 |             |
| 1076.033031  | 1291.661037  |             |             |             |             |
| NDNF         | NDNF         | 1.041678189 | 22.88874098 | 0           | 21.57672195 |
| HRG          | HRG          | 1.041678189 | 1.760672383 | 0           | 0           |

|             |             |             |             |             |   |
|-------------|-------------|-------------|-------------|-------------|---|
| CFTR        | CFTR        | 0           | 0.880336191 | 1.115060136 | 0 |
| GUCA1A      | GUCA1A      | 0           | 0           | 2.942280266 |   |
| TEX22       | TEX22       | 3.125034566 | 14.96571525 | 10.03554123 |   |
| 11.76912106 |             |             |             |             |   |
| C19orf81    | C19orf81    | 0           | 0.880336191 | 2.230120273 |   |
|             | 4.903800443 |             |             |             |   |
| OXLD1       | OXLD1       | 932.3019789 | 946.3614058 | 864.1716056 |   |
| 1186.719707 |             |             |             |             |   |
| ANKRD20A5P  | ANKRD20A5P  |             | 91.66768061 | 159.3408507 |   |
| 119.3114346 | 131.4218519 |             |             |             |   |
| LOC285762   | LOC285762   |             | 2.083356377 | 1.760672383 | 0 |
|             | 0.980760089 |             |             |             |   |
| NDRG3       | NDRG3       | 3825.042309 | 3622.583428 | 2482.123863 |   |
| 3423.83347  |             |             |             |             |   |
| ANKS3       | ANKS3       | 397.9210681 | 328.3653994 | 380.2355065 |   |
| 405.0539166 |             |             |             |             |   |
| FBX043      | FBX043      | 202.0855686 | 315.1603565 | 129.3469758 |   |
| 261.8629437 |             |             |             |             |   |
| ADM5        | ADM5        | 57.29230038 | 30.8117667  | 15.61084191 |   |
| 54.92256497 |             |             |             |             |   |
| AN09        | AN09        | 340.6287677 | 380.3052347 | 346.7837024 |   |
| 488.4185242 |             |             |             |             |   |
| AIM1L       | AIM1L       | 54.16726581 | 53.70050768 | 15.61084191 |   |
| 50.01876452 |             |             |             |             |   |
| SPINK4      | SPINK4      | 1.041678189 | 5.282017149 | 0           | 0 |
| RBMXL2      | RBMXL2      | 1.041678189 | 0.880336191 | 0           | 0 |
| JAZF1       | JAZF1       | 86.45928966 | 153.1784973 | 168.3740806 |   |
| 316.7855086 |             |             |             |             |   |
| FOXN4       | FOXN4       | 3.125034566 | 0           | 0           | 0 |
| ZNF517      | ZNF517      | 43.75048393 | 50.17916291 | 64.6734879  |   |
| 46.09572417 |             |             |             |             |   |
| ADAMTSL5    | ADAMTSL5    |             | 83.3342551  | 60.74319721 |   |
| 108.1608332 | 170.6522554 |             |             |             |   |
| LYPD6B      | LYPD6B      | 0           | 9.683698106 | 0           | 0 |
| TMED8       | TMED8       | 492.7137833 | 677.8588674 | 402.5367092 |   |
| 529.6104479 |             |             |             |             |   |
| PLAT        | PLAT        | 396.8793899 | 190.1526174 | 311.101778  |   |
| 316.7855086 |             |             |             |             |   |
| RPS26       | RPS26       | 11823.04744 | 12037.71708 | 12485.32835 |   |
| 9305.451721 |             |             |             |             |   |
| RPS25       | RPS25       | 21377.31979 | 24152.90375 | 37768.20188 |   |
| 29861.20242 |             |             |             |             |   |
| ABCB1       | ABCB1       | 562.5062219 | 649.6881093 | 1058.192069 |   |
| 985.6638891 |             |             |             |             |   |
| FANCD2      | FANCD2      | 4333.381265 | 5797.013821 | 2993.936466 |   |
| 3907.348193 |             |             |             |             |   |
| KRT222      | KRT222      | 0           | 4.401680957 | 0           | 0 |
| IGSF3       | IGSF3       | 71.87579502 | 127.6487478 | 36.7969845  |   |
| 70.61472638 |             |             |             |             |   |
| KRTAP29-1   | KRTAP29-1   | 0           | 0.880336191 | 17.84096218 |   |

|         |         |             |             |             |             |   |
|---------|---------|-------------|-------------|-------------|-------------|---|
|         | 0       |             |             |             |             |   |
| HCG8    | HCG8    | 0           | 3.521344766 | 0           | 10.78836098 |   |
| BMPR1A  | BMPR1A  | 515.6307034 |             | 470.0995262 | 515.157783  |   |
|         |         | 587.4752931 |             |             |             |   |
| TRANK1  | TRANK1  | 361.4623315 |             | 996.5405687 | 3025.15815  |   |
|         |         | 1101.39358  |             |             |             |   |
| ZNF432  | ZNF432  | 255.2111562 |             | 184.8706002 | 417.032491  |   |
|         |         | 340.3237508 |             |             |             |   |
| KCNA4   | KCNA4   | 1.041678189 |             | 0           | 0           | 0 |
| MZB1    | MZB1    | 1137.512582 |             | 1887.440794 | 212.976486  |   |
|         |         | 653.1862191 |             |             |             |   |
| BNIP2   | BNIP2   | 10470.94915 |             | 8389.603904 | 9231.582868 |   |
|         |         | 7387.084988 |             |             |             |   |
| PRKD3   | PRKD3   | 2145.857069 |             | 2814.434804 | 2767.579258 |   |
|         |         | 3567.024442 |             |             |             |   |
| GTF2F2  | GTF2F2  | 1710.435586 |             | 1475.443457 | 1568.889612 |   |
|         |         | 1480.947734 |             |             |             |   |
| SMG5    | SMG5    | 6349.02856  |             | 6520.65017  | 7882.360103 |   |
|         |         | 6830.994018 |             |             |             |   |
| ALG5    | ALG5    | 3746.916445 |             | 3344.397191 | 2720.746732 |   |
|         |         | 2689.244163 |             |             |             |   |
| C5orf52 | C5orf52 | 23.95859834 |             | 11.44437049 | 12.2656615  | 0 |
| C1orf50 | C1orf50 | 948.9688299 |             | 780.8582018 | 1022.510145 |   |
|         |         | 796.377192  |             |             |             |   |
| WHAMM   | WHAMM   | 266.6696163 |             | 259.6991765 | 934.4203942 |   |
|         |         | 413.8807574 |             |             |             |   |
| TESPA1  | TESPA1  | 6509.447001 |             | 4824.242329 | 9575.02139  |   |
|         |         | 8602.246738 |             |             |             |   |
| EVI5L   | EVI5L   | 92.70935879 |             | 273.7845555 | 253.1186509 |   |
|         |         | 144.171733  |             |             |             |   |
| PARG    | PARG    | 1558.35057  |             | 1348.675045 | 1398.285411 |   |
|         |         | 1550.5817   |             |             |             |   |
| RHOA    | RHOA    | 45242.16709 |             | 40211.11622 | 35287.19307 |   |
|         |         | 36246.93136 |             |             |             |   |
| GSTT1   | GSTT1   | 147.9183028 |             | 247.3744698 | 182.8698623 |   |
|         |         | 367.7850333 |             |             |             |   |
| AKIP1   | AKIP1   | 2006.272191 |             | 1157.642092 | 1565.544431 |   |
|         |         | 1432.89049  |             |             |             |   |
| NOM01   | NOM01   | 5501.102515 |             | 3518.703757 | 3784.514102 |   |
|         |         | 3076.644398 |             |             |             |   |
| GUSB    | GUSB    | 5891.731835 |             | 4866.498466 | 3724.300855 |   |
|         |         | 4510.515648 |             |             |             |   |
| GUCY2D  | GUCY2D  | 0           | 0           | 0           | 0.980760089 |   |
| NDN     | NDN     | 102.0844625 |             | 377.6642261 | 44.60240545 |   |
|         |         | 190.2674572 |             |             |             |   |
| NGFR    | NGFR    | 2.083356377 |             | 3.521344766 | 27.87650341 |   |
|         |         | 0.980760089 |             |             |             |   |
| ZNF580  | ZNF580  | 735.4248012 |             | 1076.651162 | 486.1662194 |   |
|         |         | 631.6094971 |             |             |             |   |
| DPM3    | DPM3    | 287.5031801 |             | 528.2017149 | 296.6059962 |   |

|                |                |               |             |             |
|----------------|----------------|---------------|-------------|-------------|
| 326.5931095    |                |               |             |             |
| BCAP29 BCAP29  | 3051.075415    | 1886.560458   | 1914.558254 |             |
| 1490.755335    |                |               |             |             |
| SNTG2 SNTG2    | 1.041678189    | 1.760672383   | 0           | 17.6536816  |
| ZNF664-FAM101A | ZNF664-FAM101A | 59.37565676   | 91.55496391 |             |
| 68.01866831    | 55.90332505    |               |             |             |
| ASIC3 ASIC3    | 2.083356377    | 0.880336191   | 20.07108245 |             |
| 7.846080709    |                |               |             |             |
| DCP2 DCP2      | 3404.204321    | 6282.959398   | 2920.342497 |             |
| 3030.548674    |                |               |             |             |
| RILPL1 RILPL1  | 135.4181645    | 117.0847135   | 121.5415549 |             |
| 225.5748204    |                |               |             |             |
| GGTLC1 GGTLC1  | 0 0            | 0 0.980760089 |             |             |
| KIF14 KIF14    | 2959.407734    | 3774.881589   | 1128.440858 |             |
| 1827.156045    |                |               |             |             |
| RAB3A RAB3A    | 28.12531109    | 73.94824008   | 30.10662368 |             |
| 51.9802847     |                |               |             |             |
| RAB2A RAB2A    | 5631.312288    | 4263.468175   | 5651.124771 |             |
| 5090.14486     |                |               |             |             |
| FBX022 FBX022  | 4609.425985    | 2800.349425   | 3502.403888 |             |
| 3181.585728    |                |               |             |             |
| TEN1-CDK3      | TEN1-CDK3      | 929.1769443   | 758.849797  |             |
| 731.4794494    | 549.2256497    |               |             |             |
| MAP1A MAP1A    | 1105.220558    | 198.0756431   | 323.3674395 |             |
| 158.8831344    |                |               |             |             |
| TRIM16 TRIM16  | 1143.762651    | 2542.410921   | 475.015618  |             |
| 812.0693534    |                |               |             |             |
| ZNF337 ZNF337  | 908.3433805    | 908.5069496   | 1399.400471 |             |
| 1417.198328    |                |               |             |             |
| KIAA1671       | KIAA1671       | 820.8424127   | 1088.975869 |             |
| 774.9667947    | 401.1308763    |               |             |             |
| C14orf80       | C14orf80       | 2240.649784   | 1870.714407 |             |
| 1566.659491    | 1592.754384    |               |             |             |
| NAT1 NAT1      | 901.0516332    | 909.3872858   | 604.3625939 |             |
| 627.6864567    |                |               |             |             |
| ARRDC3 ARRDC3  | 972.9274282    | 846.00308     | 12523.24039 |             |
| 2797.127773    |                |               |             |             |
| RIMBP3 RIMBP3  | 29.16698928    | 53.70050768   | 138.2674569 |             |
| 111.8066501    |                |               |             |             |
| PCDHB5 PCDHB5  | 0 0            | 0 3.923040355 |             |             |
| HIPK2 HIPK2    | 384.3792516    | 1152.360075   | 919.9246124 |             |
| 1006.259851    |                |               |             |             |
| TNNI3K TNNI3K  | 11.45846008    | 7.042689532   | 22.30120273 |             |
| 34.3266031     |                |               |             |             |
| UTP23 UTP23    | 1554.183858    | 1377.72614    | 1923.478735 |             |
| 1522.139658    |                |               |             |             |
| C9orf156       | C9orf156       | 1570.850709   | 1154.120747 |             |
| 1439.542636    | 1082.759138    |               |             |             |
| LOC100130705   | LOC100130705   | 0             | 9.683698106 | 1.115060136 |
| 1.961520177    |                |               |             |             |

|              |              |             |             |             |
|--------------|--------------|-------------|-------------|-------------|
| RPTOR        | RPTOR        | 1631.268044 | 2540.650248 | 1154.087241 |
| 1173.969826  |              |             |             |             |
| FMOD         | FMOD         | 32.29202385 | 17.60672383 | 26.76144327 |
| 38.24964346  |              |             |             |             |
| DDB1         | DDB1         | 23309.63283 | 23945.14441 | 19791.20236 |
| 21908.21886  |              |             |             |             |
| OSBPL1A      | OSBPL1A      | 20.83356377 | 183.990264  | 37.91204463 |
| 187.3251769  |              |             |             |             |
| MAML1        | MAML1        | 1173.971319 | 2022.132232 | 1523.172146 |
| 1441.71733   |              |             |             |             |
| SPCS2        | SPCS2        | 8948.015641 | 6843.733552 | 7079.516805 |
| 6412.20946   |              |             |             |             |
| ZNRF2P1      | ZNRF2P1      | 7.291747321 | 51.0594991  | 15.61084191 |
| 50.99952461  |              |             |             |             |
| FAM171A1     | FAM171A1     |             | 409.3795282 | 176.0672383 |
| 702.4878858  | 569.8216115  |             |             |             |
| PTPMT1       | PTPMT1       | 5794.855764 | 4867.378802 | 4509.303191 |
| 4806.705195  |              |             |             |             |
| KIF18B       | KIF18B       | 1770.852921 | 3702.694021 | 1103.909535 |
| 1415.236808  |              |             |             |             |
| NAB1         | NAB1         | 728.1330539 | 1618.938256 | 730.3643893 |
| 1274.007355  |              |             |             |             |
| CDR2L        | CDR2L        | 6.250069132 | 40.49546481 | 7.805420954 |
| 15.69216142  |              |             |             |             |
| ROB01        | ROB01        | 8.33342551  | 48.41849053 | 52.4078264  |
| 30.40356275  |              |             |             |             |
| MIPEP        | MIPEP        | 1584.392525 | 1005.343931 | 1349.222765 |
| 1259.295954  |              |             |             |             |
| SLC5A2       | SLC5A2       | 469.7968631 | 439.2877595 | 469.4403174 |
| 627.6864567  |              |             |             |             |
| LOC102723617 | LOC102723617 |             | 0           | 0           |
| CCDC125      | CCDC125      | 328.1286294 | 616.235334  | 405.8818896 |
| 607.0904949  |              |             |             |             |
| ZDHHC17      | ZDHHC17      | 1331.264725 | 1684.083134 | 1300.160119 |
| 1765.36816   |              |             |             |             |
| PCDHGB5      | PCDHGB5      | 19.79188559 | 9.683698106 | 71.36384872 |
| 12.74988115  |              |             |             |             |
| RBM20        | RBM20        | 2.083356377 | 6.16235334  | 17.84096218 |
| 8.826840798  |              |             |             |             |
| ZNF584       | ZNF584       | 703.1327774 | 462.1765005 | 1112.830016 |
| 968.0102075  |              |             |             |             |
| TSTD2        | TSTD2        | 1690.6437   | 1643.587669 | 2226.775092 |
| 2150.806874  |              |             |             |             |
| LRRC70       | LRRC70       | 28.12531109 | 45.77748195 | 17.84096218 |
| 14.71140133  |              |             |             |             |
| BTBD16       | BTBD16       | 0           | 0           | 2.230120273 |
| ENKUR        | ENKUR        | 0           | 1.760672383 | 2.230120273 |
| RAC2         | RAC2         | 41601.50182 | 38498.86232 | 20277.36858 |
| 32278.77604  |              |             |             |             |
| VPS33A       | VPS33A       | 5101.09809  | 4290.758597 | 4053.243595 |

|              |              |             |             |             |             |
|--------------|--------------|-------------|-------------|-------------|-------------|
| 3932.847956  |              |             |             |             |             |
| BTG4         | BTG4         | 4.166712755 | 0.880336191 | 0           | 4.903800443 |
| ZC3H7B       | ZC3H7B       | 277.0863982 | 595.9876016 | 257.5788915 |             |
| 370.7273135  |              |             |             |             |             |
| RNF144B      | RNF144B      | 28.12531109 | 56.34151625 | 221.8969671 |             |
| 117.6912106  |              |             |             |             |             |
| MFSD12       | MFSD12       | 3079.200726 | 2629.564204 | 2896.926234 |             |
| 3455.217792  |              |             |             |             |             |
| LINC00672    | LINC00672    |             | 35.41705842 | 33.45277527 |             |
| 30.10662368  | 40.21116364  |             |             |             |             |
| LOC101929743 | LOC101929743 |             | 0           | 0.880336191 | 0           |
| MAPK8IP2     | MAPK8IP2     |             | 5.208390943 | 4.401680957 | 0           |
| 10.03554123  | 2.942280266  |             |             |             |             |
| ZNF75D       | ZNF75D       | 741.6748704 | 817.8323218 | 1381.559509 |             |
| 1236.738472  |              |             |             |             |             |
| MED1         | MED1         | 3070.8673   | 3653.395194 | 2844.518408 |             |
| 2961.895468  |              |             |             |             |             |
| PTPN21       | PTPN21       | 3.125034566 | 0           | 0           | 0           |
| DKK4         | DKK4         | 0           | 0           | 1.961520177 |             |
| ZBTB11       | ZBTB11       | 2515.652826 | 3093.501377 | 3426.579799 |             |
| 3183.547248  |              |             |             |             |             |
| CERS4        | CERS4        | 427.0880574 | 385.5872518 | 627.7788567 |             |
| 550.2064097  |              |             |             |             |             |
| SUV420H1     | SUV420H1     |             | 2350.025994 | 2185.874763 |             |
| 2719.631672  | 2562.726112  |             |             |             |             |
| ABRA         | ABRA         | 3.125034566 | 3.521344766 | 0           | 7.846080709 |
| ICE2         | ICE2         | 4628.176192 | 3884.923613 | 4213.812255 |             |
| 3951.482397  |              |             |             |             |             |
| SPATS2       | SPATS2       | 633.3403387 | 801.1059342 | 243.0831097 |             |
| 513.9182865  |              |             |             |             |             |
| ANAPC1       | ANAPC1       | 7067.78651  | 8841.216371 | 7216.669202 |             |
| 7947.098998  |              |             |             |             |             |
| LMNTD2       | LMNTD2       | 16.66685102 | 42.25613719 | 50.17770613 |             |
| 36.28812328  |              |             |             |             |             |
| AIP          | AIP          | 10045.94445 | 8408.090964 | 6776.220448 |             |
| 8255.057666  |              |             |             |             |             |
| CRYBB3       | CRYBB3       | 2.083356377 | 0           | 5.575300681 | 1.961520177 |
| CRY1         | CRY1         | 2714.61336  | 2535.368231 | 3617.255082 |             |
| 2995.241311  |              |             |             |             |             |
| LIPG         | LIPG         | 2.083356377 | 0.880336191 | 3.345180409 |             |
| 8.826840798  |              |             |             |             |             |
| AKR1B1       | AKR1B1       | 10971.99636 | 10644.14489 | 6060.351841 |             |
| 8094.213012  |              |             |             |             |             |
| RABAC1       | RABAC1       | 2094.814837 | 1800.287511 | 2534.53169  |             |
| 2103.73039   |              |             |             |             |             |
| WBP1         | WBP1         | 1014.594556 | 1247.436383 | 761.5860731 |             |
| 782.6465508  |              |             |             |             |             |
| RCC2         | RCC2         | 6296.944651 | 14527.30783 | 5522.892855 |             |
| 7534.199001  |              |             |             |             |             |
| FSD1L        | FSD1L        | 256.2528344 | 203.3576602 | 244.1981698 |             |



|               |               |             |             |             |
|---------------|---------------|-------------|-------------|-------------|
| 235.3824213   |               |             |             |             |
| TIMP2         | TIMP2         | 2.083356377 | 34.33311147 | 1.115060136 |
| 8.826840798   |               |             |             |             |
| NPRL2         | NPRL2         | 3670.873937 | 2422.685199 | 3199.107531 |
| 3239.450573   |               |             |             |             |
| HSPD1         | HSPD1         | 47202.60544 | 32081.21149 | 44012.53864 |
| 43843.899     |               |             |             |             |
| STX2          | STX2          | 1727.102437 | 1171.727471 | 1034.775806 |
| 1156.316145   |               |             |             |             |
| DNAJC25-GNG10 | DNAJC25-GNG10 | 2795.864258 | 2297.67746  |             |
| 1833.158864   | 1960.539417   |             |             |             |
| UCHL1         | UCHL1         | 159.3767629 | 82.751602   | 90.31987104 |
| 49.03800443   |               |             |             |             |
| TPH1          | TPH1          | 4.166712755 | 2.641008574 | 14.49578177 |
| 3.923040355   |               |             |             |             |
| CHERP         | CHERP         | 2389.609765 | 3846.18882  | 2836.712987 |
| 2605.879556   |               |             |             |             |
| RGS9BP        | RGS9BP        | 3.125034566 | 2.641008574 | 5.575300681 |
| 5.884560532   |               |             |             |             |
| OR10W1        | OR10W1        | 0           | 0           | 0.980760089 |
| UBE2M         | UBE2M         | 2128.14854  | 3539.831826 | 1974.771501 |
| 1939.943455   |               |             |             |             |
| KCNC3         | KCNC3         | 2.083356377 | 7.042689532 | 10.03554123 |
| 7.846080709   |               |             |             |             |
| CNTN2         | CNTN2         | 0           | 2.641008574 | 3.345180409 |
| SELE          | SELE          | 1.041678189 | 0           | 0           |
| LOC100130872  | LOC100130872  | 117.7096353 | 357.4164937 |             |
| 105.9307129   | 191.2482173   |             |             |             |
| ZGRF1         | ZGRF1         | 1340.639829 | 2385.711079 | 825.1445008 |
| 1555.485501   |               |             |             |             |
| SCN3B         | SCN3B         | 9.375103698 | 5.282017149 | 1.115060136 |
| 0.980760089   |               |             |             |             |
| SOX18         | SOX18         | 34.37538023 | 18.48706002 | 3.345180409 |
| 16.67292151   |               |             |             |             |
| PIGZ          | PIGZ          | 8.33342551  | 46.65781815 | 13.38072164 |
| 23.53824213   |               |             |             |             |
| PARM1         | PARM1         | 2.083356377 | 1.760672383 | 0           |
| NPDC1         | NPDC1         | 879.1763913 | 1583.724808 | 11.76912106 |
| 721.8394253   |               |             |             |             |
| CD1C          | CD1C          | 0           | 33.45277527 | 0           |
| CSNK1E        | CSNK1E        | 1359.390036 | 1824.936925 | 28.44204257 |
| 1597.658184   |               |             |             | 1265.593255 |
| CTNNA1        | CTNNA1        | 4682.343458 | 3724.702426 | 3920.551439 |
| 4267.287146   |               |             |             |             |
| SLC25A15      | SLC25A15      | 1532.308616 | 1375.085131 |             |
| 1549.933589   | 1691.811153   |             |             |             |
| LTK           | LTK           | 117.7096353 | 146.1358078 | 10.03554123 |
| 40.21116364   |               |             |             |             |
| PTS           | PTS           | 1477.099672 | 1227.188651 | 1310.19566  |
| 1029.798093   |               |             |             |             |

|                 |               |             |               |   |
|-----------------|---------------|-------------|---------------|---|
| MY09A MY09A     | 670.8407535   | 858.3277867 | 1353.683005   |   |
| 1161.219945     |               |             |               |   |
| CD160 CD160     | 48.95887487   | 43.13647338 | 114.851194    |   |
| 34.3266031      |               |             |               |   |
| HOXB3 HOXB3     | 12.50013826   | 66.02521436 | 13.38072164   |   |
| 12.74988115     |               |             |               |   |
| EFNA5 EFNA5     | 0 1.760672383 | 4.460240545 | 2.942280266   |   |
| GCLM GCLM       | 3675.04065    | 2481.667724 | 3474.527385   |   |
| 1609.427306     |               |             |               |   |
| FH FH           | 6155.276417   | 5823.423906 | 3997.490589   |   |
| 4718.436787     |               |             |               |   |
| EEF1G EEF1G     | 25540.90751   | 19689.59926 | 24653.97961   |   |
| 23709.87514     |               |             |               |   |
| PRR19 PRR19     | 653.1322243   | 637.3634026 | 594.3270526   |   |
| 727.7239858     |               |             |               |   |
| FAM179A FAM179A | 512.5056688   | 361.8181747 | 111.5060136   |   |
| 237.3439415     |               |             |               |   |
| TXNDC12 TXNDC12 | 9021.974792   | 7257.491562 | 7369.432441   |   |
| 6712.322047     |               |             |               |   |
| MIR4657 MIR4657 | 25.00027653   | 45.77748195 | 34.56686422   |   |
| 33.34584301     |               |             |               |   |
| MIR4656 MIR4656 | 2.083356377   | 2.641008574 | 2.230120273   | 0 |
| MIR4647 MIR4647 | 525.0058071   | 397.0316223 | 308.8716577   |   |
| 356.9966723     |               |             |               |   |
| MIR4644 MIR4644 | 2.083356377   | 0.880336191 | 0 8.826840798 |   |
| OCEL1 OCEL1     | 289.5865365   | 367.980528  | 498.4318809   |   |
| 427.6113987     |               |             |               |   |
| CCDC30 CCDC30   | 9.375103698   | 3.521344766 | 0 11.76912106 |   |
| CYP2C18 CYP2C18 | 6.250069132   | 6.16235334  | 23.41626286   |   |
| 46.09572417     |               |             |               |   |
| SNCG SNCG       | 0 0           | 1.115060136 | 0             |   |
| SNCB SNCB       | 0 4.401680957 | 1.115060136 | 5.884560532   |   |
| CCL5 CCL5       | 4570.883892   | 5080.420161 | 3698.654472   |   |
| 5769.811602     |               |             |               |   |
| CCL4 CCL4       | 4436.507406   | 16975.52278 | 4110.111662   |   |
| 21210.89844     |               |             |               |   |
| KLRB1 KLRB1     | 220.835776    | 108.2813515 | 195.1355238   |   |
| 271.6705446     |               |             |               |   |
| C19orf44        | C19orf44      | 943.760439  | 1292.333529   |   |
| 1156.317361     | 994.4907299   |             |               |   |
| NLRC5 NLRC5     | 5478.185594   | 7935.35043  | 10598.6466    |   |
| 8521.82441      |               |             |               |   |
| GRK7 GRK7       | 2.083356377   | 1.760672383 | 0 0           |   |
| SYDE2 SYDE2     | 50.00055306   | 23.76907717 | 252.0035908   |   |
| 179.4790962     |               |             |               |   |
| BBS2 BBS2       | 654.1739025   | 713.9526513 | 1977.001622   |   |
| 1540.774099     |               |             |               |   |
| EMILIN2 EMILIN2 | 595.8399239   | 452.4928024 | 645.6198189   |   |
| 634.5517774     |               |             |               |   |
| STK11IP STK11IP | 1698.977126   | 1634.784308 | 1146.28182    |   |

|             |          |             |             |             |             |
|-------------|----------|-------------|-------------|-------------|-------------|
| 1393.660086 |          |             |             |             |             |
| DPY19L2     | DPY19L2  | 0           | 12.32470668 | 1.115060136 | 26.48052239 |
| DIP2C       | DIP2C    | 11.45846008 | 33.45277527 | 267.6144327 |             |
| 50.99952461 |          |             |             |             |             |
| ZNF296      | ZNF296   | 255.2111562 | 181.3492554 | 191.7903434 |             |
| 207.9211388 |          |             |             |             |             |
| SLC2A3      | SLC2A3   | 15003.29095 | 14471.84665 | 11607.77602 |             |
| 16381.63576 |          |             |             |             |             |
| OMP         | OMP      | 0           | 0           | 1.115060136 | 0           |
| NAA50       | NAA50    | 16646.01746 | 12434.7487  | 13697.39871 |             |
| 12846.9764  |          |             |             |             |             |
| LYAR        | LYAR     | 3386.495791 | 2884.861699 | 3162.310546 |             |
| 2826.550576 |          |             |             |             |             |
| MKRN2       | MKRN2    | 5561.519849 | 3553.917205 | 5323.297091 |             |
| 4410.478119 |          |             |             |             |             |
| DEFB132     | DEFB132  | 0           | 2.641008574 | 0           | 0           |
| LAMP3       | LAMP3    | 1593.767629 | 711.3116427 | 8468.881735 |             |
| 3329.680501 |          |             |             |             |             |
| BRPF3       | BRPF3    | 482.2970014 | 751.8071075 | 1307.96554  |             |
| 878.7610394 |          |             |             |             |             |
| SGIP1       | SGIP1    | 1.041678189 | 23.76907717 | 0           | 13.73064124 |
| SV2C        | SV2C     | 1.041678189 | 13.20504287 | 39.02710477 |             |
| 14.71140133 |          |             |             |             |             |
| UBA3        | UBA3     | 12831.39193 | 9199.513201 | 7465.327612 |             |
| 9002.396854 |          |             |             |             |             |
| RTCB        | RTCB     | 15892.88413 | 9288.427156 | 11707.01637 |             |
| 10923.70587 |          |             |             |             |             |
| TSTD3       | TSTD3    | 127.084739  | 171.6655573 | 78.05420954 |             |
| 125.5372913 |          |             |             |             |             |
| MAPK8IP3    | MAPK8IP3 |             | 291.6698928 | 931.3956905 |             |
| 495.0867005 |          | 507.0529658 |             |             |             |
| EMC2        | EMC2     | 2062.522814 | 1539.707999 | 2262.457016 |             |
| 1782.041081 |          |             |             |             |             |
| BMPR2       | BMPR2    | 444.7965866 | 566.0561711 | 795.0378772 |             |
| 473.7071228 |          |             |             |             |             |
| MAPK12      | MAPK12   | 154.1683719 | 314.2800203 | 57.98312709 |             |
| 128.4795716 |          |             |             |             |             |
| KLF9        | KLF9     | 67.70908227 | 202.477324  | 151.6481785 |             |
| 170.6522554 |          |             |             |             |             |
| UCN         | UCN      | 6.250069132 | 23.76907717 | 22.30120273 |             |
| 7.846080709 |          |             |             |             |             |
| TOP2B       | TOP2B    | 9182.393233 | 16083.74222 | 8999.65036  |             |
| 12119.25242 |          |             |             |             |             |
| TIGD1       | TIGD1    | 385.4209298 | 376.7838899 | 483.9360991 |             |
| 593.3598536 |          |             |             |             |             |
| BACH2       | BACH2    | 542.7143363 | 848.6440885 | 3620.600262 |             |
| 3523.870999 |          |             |             |             |             |
| B9D1        | B9D1     | 93.75103698 | 87.15328295 | 34.56686422 |             |
| 111.8066501 |          |             |             |             |             |
| MIR3176     | MIR3176  | 0           | 1.760672383 | 0           | 0           |

|             |             |             |             |             |             |
|-------------|-------------|-------------|-------------|-------------|-------------|
| MIR3175     | MIR3175     | 3.125034566 | 0.880336191 | 3.345180409 |             |
| 1.961520177 |             |             |             |             |             |
| MIR3173     | MIR3173     | 0           | 0           | 0.980760089 |             |
| MIR1260B    | MIR1260B    |             | 4.166712755 | 14.96571525 |             |
| 32.33674395 | 32.36508293 |             |             |             |             |
| MIR3165     | MIR3165     | 1.041678189 | 0           | 0           | 0           |
| MIR3162     | MIR3162     | 0           | 0.880336191 | 0           | 0.980760089 |
| MIR3160-2   | MIR3160-2   |             | 0           | 0.880336191 | 0           |
| MIR3160-1   | MIR3160-1   |             | 0           | 0.880336191 | 0           |
| SLC2A6      | SLC2A6      | 82.29257691 | 84.51227438 | 206.2861252 |             |
| 147.1140133 |             |             |             |             |             |
| RPL27       | RPL27       | 12066.80014 | 13268.42708 | 13452.08548 |             |
| 11910.35052 |             |             |             |             |             |
| C10orf105   | C10orf105   |             | 11.45846008 | 14.96571525 |             |
| 3.345180409 | 23.53824213 |             |             |             |             |
| ADRB2       | ADRB2       | 29.16698928 | 60.74319721 | 151.6481785 |             |
| 99.05676896 |             |             |             |             |             |
| IMPACT      | IMPACT      | 822.9257691 | 1228.949323 | 1030.315566 |             |
| 1345.602842 |             |             |             |             |             |
| FBX06       | FBX06       | 3023.991782 | 1551.152369 | 3079.796096 |             |
| 1845.790487 |             |             |             |             |             |
| ZBTB43      | ZBTB43      | 1431.265831 | 1110.984274 | 1779.635977 |             |
| 1575.100702 |             |             |             |             |             |
| AMIG01      | AMIG01      | 29.16698928 | 34.33311147 | 443.7939342 |             |
| 361.9004727 |             |             |             |             |             |
| APMAP       | APMAP       | 6797.991859 | 4799.592916 | 6380.3741   |             |
| 5477.545095 |             |             |             |             |             |
| SMA4        | SMA4        | 133.3348082 | 117.0847135 | 137.1523968 |             |
| 135.3448922 |             |             |             |             |             |
| INPP5A      | INPP5A      | 354.1705842 | 234.1694269 | 343.438522  |             |
| 352.0928718 |             |             |             |             |             |
| OPA1-AS1    | OPA1-AS1    |             | 653.1322243 | 517.6376806 |             |
| 409.22707   | 509.014486  |             |             |             |             |
| S100Z       | S100Z       | 32.29202385 | 22.00840479 | 5.575300681 |             |
| 20.59596186 |             |             |             |             |             |
| ACSM4       | ACSM4       | 1.041678189 | 0           | 0           | 0           |
| C5orf47     | C5orf47     | 0           | 3.345180409 | 0           |             |
| ORMDL3      | ORMDL3      | 2912.532216 | 5892.090129 | 4455.780305 |             |
| 3907.348193 |             |             |             |             |             |
| TMEM14A     | TMEM14A     | 1400.015486 | 1368.922778 | 1239.946872 |             |
| 1189.661988 |             |             |             |             |             |
| RELT        | RELT        | 1065.636787 | 1092.497214 | 802.8432981 |             |
| 1242.623032 |             |             |             |             |             |
| MICALCL     | MICALCL     | 13.54181645 | 31.69210289 | 0           | 5.884560532 |
| BOD1L1      | BOD1L1      | 1610.43448  | 1721.057254 | 2401.839534 |             |
| 1753.599039 |             |             |             |             |             |
| FAM65C      | FAM65C      | 34.37538023 | 17.60672383 | 111.5060136 |             |
| 77.480047   |             |             |             |             |             |
| ATP2C2      | ATP2C2      | 6.250069132 | 33.45277527 | 7.805420954 |             |
| 4.903800443 |             |             |             |             |             |

|             |           |             |             |             |             |
|-------------|-----------|-------------|-------------|-------------|-------------|
| CCDC91      | CCDC91    | 1150.01272  | 1125.069653 | 1781.866098 |             |
| 1343.641321 |           |             |             |             |             |
| RAET1E      | RAET1E    | 2.083356377 | 11.44437049 | 0           | 5.884560532 |
| EXOSC8      | EXOSC8    | 7865.712003 | 6481.915378 | 5745.904882 |             |
| 6593.650076 |           |             |             |             |             |
| TMEM80      | TMEM80    | 633.3403387 | 464.8175091 | 449.3692349 |             |
| 379.5541543 |           |             |             |             |             |
| NAP1L2      | NAP1L2    | 77.08418596 | 44.89714576 | 74.70902913 |             |
| 68.65320621 |           |             |             |             |             |
| MAFA        | MAFA      | 1.041678189 | 6.16235334  | 0           | 0.980760089 |
| CUX2        | CUX2      | 0           | 1.760672383 | 7.805420954 | 0.980760089 |
| HMX3        | HMX3      | 0           | 0.880336191 | 0           | 2.942280266 |
| LINC00235   | LINC00235 |             | 2.083356377 | 6.16235334  | 0           |
|             |           | 5.884560532 |             |             |             |
| CD58        | CD58      | 6068.817127 | 5614.784229 | 2268.032317 |             |
| 2709.840125 |           |             |             |             |             |
| EMG1        | EMG1      | 5193.807449 | 3424.507785 | 5535.158516 |             |
| 4516.400208 |           |             |             |             |             |
| RNFT2       | RNFT2     | 110.417888  | 138.2127821 | 90.31987104 |             |
| 73.55700665 |           |             |             |             |             |
| NFS1        | NFS1      | 2819.822857 | 2685.025384 | 2273.607618 |             |
| 2786.339412 |           |             |             |             |             |
| ASS1        | ASS1      | 15.62517283 | 61.6235334  | 0           | 17.6536816  |
| ITFG1       | ITFG1     | 3621.915062 | 2774.819675 | 2933.723219 |             |
| 2701.013284 |           |             |             |             |             |
| THOC3       | THOC3     | 4632.342905 | 1789.723477 | 3482.332806 |             |
| 2089.999749 |           |             |             |             |             |
| PPP1R35     | PPP1R35   | 1740.644253 | 1859.270036 | 1223.220969 |             |
| 1674.157471 |           |             |             |             |             |
| SLC35D3     | SLC35D3   | 7.291747321 | 0           | 0           | 0           |
| RFFL        | RFFL      | 2801.072649 | 5333.076648 | 3283.852101 |             |
| 3616.062447 |           |             |             |             |             |
| SRP14-AS1   | SRP14-AS1 |             | 400.0044245 | 241.2121165 |             |
| 448.2541748 |           | 322.6700692 |             |             |             |
| N4BP2       | N4BP2     | 1992.730375 | 3236.996176 | 1447.348057 |             |
| 2020.365783 |           |             |             |             |             |
| BOK         | BOK       | 1.041678189 | 6.16235334  | 0           | 2.942280266 |
| MAP1LC3A    | MAP1LC3A  |             | 298.9616402 | 618.8763426 |             |
| 105.9307129 |           | 189.2866971 |             |             |             |
| KDM4B       | KDM4B     | 1036.469798 | 2060.867024 | 1344.762524 |             |
| 2029.192623 |           |             |             |             |             |
| EMC6        | EMC6      | 3300.036502 | 3119.031126 | 2652.728064 |             |
| 2382.266255 |           |             |             |             |             |
| RNF208      | RNF208    | 3.125034566 | 4.401680957 | 1.115060136 | 0           |
| STEAP4      | STEAP4    | 0           | 0.880336191 | 0           | 0           |
| PCBD1       | PCBD1     | 997.9277048 | 1121.548308 | 748.2053514 |             |
| 918.9722031 |           |             |             |             |             |
| EBNA1BP2    | EBNA1BP2  |             | 9991.777186 | 5649.11734  |             |
| 7527.77098  |           | 7891.195673 |             |             |             |
| TDRD1       | TDRD1     | 8.33342551  | 74.82857627 | 2.230120273 |             |

|                           |               |               |               |  |
|---------------------------|---------------|---------------|---------------|--|
| 115.7296905               |               |               |               |  |
| ATG10 ATG10               | 472.9218977   | 635.6027302   | 417.032491    |  |
| 623.7634164               |               |               |               |  |
| GOLGA4 GOLGA4             | 2827.114604   | 2979.057672   | 4226.077916   |  |
| 2929.530385               |               |               |               |  |
| TTBK2 TTBK2               | 390.6293208   | 435.7664148   | 761.5860731   |  |
| 609.0520151               |               |               |               |  |
| PTER PTER                 | 2312.525579   | 1582.844472   | 2268.032317   |  |
| 1915.424453               |               |               |               |  |
| SRXN1 SRXN1               | 7233.413342   | 2829.400519   | 5542.963937   |  |
| 2388.150816               |               |               |               |  |
| ADAMTS14 ADAMTS14         | 5.208390943   | 10.5640343    |               |  |
| 16.72590204               | 6.865320621   |               |               |  |
| OCSTAMP OCSTAMP           | 4.166712755   | 0 0           | 15.69216142   |  |
| EEF1DP3 EEF1DP3           | 4.166712755   | 9.683698106   | 0 20.59596186 |  |
| LOC441666 LOC441666       | 40.62544936   | 28.17075813   |               |  |
| 63.55842777               | 25.49976231   |               |               |  |
| ZNF204P ZNF204P           | 10.41678189   | 8.803361914   | 439.3336937   |  |
| 151.0370537               |               |               |               |  |
| TLK2 TLK2                 | 1485.433097   | 1798.526839   | 1791.901639   |  |
| 1506.447496               |               |               |               |  |
| FAM27B FAM27B             | 19.79188559   | 37.85445623   | 8.92048109    |  |
| 18.63444168               |               |               |               |  |
| FAM27C FAM27C             | 0 0.880336191 | 1.115060136   | 1.961520177   |  |
| LINC00674 LINC00674       | 322.9202385   | 500.9112929   |               |  |
| 965.642078                | 903.2800417   |               |               |  |
| LINC00910 LINC00910       | 39.58377117   | 79.23025723   |               |  |
| 127.1168555               | 104.9413295   |               |               |  |
| GGNBP1 GGNBP1             | 15.62517283   | 18.48706002   | 1.115060136   |  |
| 16.67292151               |               |               |               |  |
| WDR93 WDR93               | 3.125034566   | 0 4.460240545 | 2.942280266   |  |
| MGC16275 MGC16275         | 147.9183028   | 102.9993344   |               |  |
| 59.09818722               | 24.51900222   |               |               |  |
| SERTAD4-AS1 SERTAD4-AS1   | 0 0.880336191 | 0 0           |               |  |
| HLA-F-AS1 HLA-F-AS1       | 33.33370204   | 84.51227438   |               |  |
| 59.09818722               | 65.71092594   |               |               |  |
| C10orf40 C10orf40         | 0 0           | 0 0.980760089 |               |  |
| LOC646762 LOC646762       | 15.62517283   | 106.5206792   |               |  |
| 18.95602232               | 82.38384745   |               |               |  |
| MSL3P1 MSL3P1             | 487.5053923   | 456.0141472   | 254.2337111   |  |
| 364.842753                |               |               |               |  |
| LINC00961 LINC00961       | 0 0           | 2.230120273   | 0             |  |
| FAM20B FAM20B             | 933.3436571   | 1339.871683   | 1296.814938   |  |
| 1437.79429                |               |               |               |  |
| INMT-FAM188B INMT-FAM188B | 79.16754234   | 90.67462772   |               |  |
| 117.0813143               | 123.5757712   |               |               |  |
| FDX1L FDX1L               | 912.5100933   | 536.1247406   | 674.6113824   |  |
| 630.628737                |               |               |               |  |
| TMEM261 TMEM261           | 1364.598427   | 2007.166516   | 1350.337825   |  |
| 1513.312817               |               |               |               |  |

|                 |             |               |               |  |  |
|-----------------|-------------|---------------|---------------|--|--|
| DYNLL1 DYNLL1   | 17468.94322 | 11800.90665   | 11159.52184   |  |  |
| 9176.97215      |             |               |               |  |  |
| SOCS1 SOCS1     | 5164.64046  | 2821.477494   | 6904.452364   |  |  |
| 4168.230377     |             |               |               |  |  |
| KCNJ10 KCNJ10   | 1.041678189 | 1.760672383   | 22.30120273   |  |  |
| 13.73064124     |             |               |               |  |  |
| KCNJ6 KCNJ6     | 0 0         | 4.460240545   | 0             |  |  |
| KCNG1 KCNG1     | 1.041678189 | 16.72638764   | 17.84096218   |  |  |
| 34.3266031      |             |               |               |  |  |
| KCNA3 KCNA3     | 5040.680755 | 10264.71999   | 5108.090484   |  |  |
| 5250.989515     |             |               |               |  |  |
| LRP1 LRP1       | 3.125034566 | 3.521344766   | 1.115060136   |  |  |
| 27.46128248     |             |               |               |  |  |
| ZNF221 ZNF221   | 28.12531109 | 49.29882672   | 24.531323     |  |  |
| 131.4218519     |             |               |               |  |  |
| ASAH2B ASAH2B   | 60.41733494 | 48.41849053   | 76.9391494    |  |  |
| 65.71092594     |             |               |               |  |  |
| MAP3K13 MAP3K13 | 791.6754234 | 868.8918209   | 898.7384698   |  |  |
| 889.5494004     |             |               |               |  |  |
| REC114 REC114   | 1.041678189 | 0.880336191   | 0 0.980760089 |  |  |
| TYW5 TYW5       | 1486.474775 | 1320.504287   | 989.0583409   |  |  |
| 1111.20118      |             |               |               |  |  |
| LOC285889       | LOC285889   | 0 0 0         | 0.980760089   |  |  |
| RGMB-AS1        | RGMB-AS1    | 0 3.521344766 | 0             |  |  |
| 1.961520177     |             |               |               |  |  |
| LOC613038       | LOC613038   | 0 2.641008574 | 0 0           |  |  |
| LOC388242       | LOC388242   | 0 2.641008574 | 0 0           |  |  |
| LOC613037       | LOC613037   | 46.87551849   | 95.95664487   |  |  |
| 88.08975076     | 64.73016585 |               |               |  |  |
| SNORA22 SNORA22 | 9.375103698 | 1.760672383   | 16.72590204   |  |  |
| 2.942280266     |             |               |               |  |  |
| ST7-OT4 ST7-OT4 | 16.66685102 | 10.5640343    | 4.460240545   |  |  |
| 6.865320621     |             |               |               |  |  |
| TUG1 TUG1       | 1061.470074 | 2988.74137    | 1509.791425   |  |  |
| 1491.736095     |             |               |               |  |  |
| PIPSL PIPSL     | 17.70852921 | 12.32470668   | 11.15060136   |  |  |
| 14.71140133     |             |               |               |  |  |
| CATSPER2P1      | CATSPER2P1  | 11.45846008   | 31.69210289   |  |  |
| 60.21324736     | 68.65320621 |               |               |  |  |
| GATAD2B GATAD2B | 357.2956187 | 1279.128486   | 807.3035387   |  |  |
| 611.9942953     |             |               |               |  |  |
| LRRC47 LRRC47   | 3386.495791 | 2867.254976   | 3757.752659   |  |  |
| 3039.375515     |             |               |               |  |  |
| GCHFR GCHFR     | 2032.314146 | 2170.909048   | 1660.324543   |  |  |
| 2452.880982     |             |               |               |  |  |
| CLEC11A CLEC11A | 12.50013826 | 55.46118006   | 42.37228518   |  |  |
| 26.48052239     |             |               |               |  |  |
| ACLY ACLY       | 18463.74589 | 18580.37566   | 13707.43426   |  |  |
| 17516.37518     |             |               |               |  |  |
| EIF2B5 EIF2B5   | 7980.296604 | 5948.431646   | 7627.011332   |  |  |

|             |             |             |             |             |             |   |
|-------------|-------------|-------------|-------------|-------------|-------------|---|
| 7728.389499 |             |             |             |             |             |   |
| F2RL1       | F2RL1       | 19.79188559 | 45.77748195 | 540.8041661 |             |   |
| 422.7075982 |             |             |             |             |             |   |
| RH0Q        | RH0Q        | 838.5509419 | 749.1660989 | 990.173401  |             |   |
| 674.762941  |             |             |             |             |             |   |
| TAF3        | TAF3        | 2019.814008 | 1435.828328 | 2598.090118 |             |   |
| 1764.3874   |             |             |             |             |             |   |
| ATAD3B      | ATAD3B      | 5217.766047 | 3061.809274 | 2894.696114 |             |   |
| 3407.160548 |             |             |             |             |             |   |
| MBD5        | MBD5        | 235.4192706 | 290.5109432 | 437.1035734 |             |   |
| 421.7268381 |             |             |             |             |             |   |
| SYT11       | SYT11       | 7075.078258 | 4943.087715 | 2729.667214 |             |   |
| 3372.833945 |             |             |             |             |             |   |
| EP0R        | EP0R        | 592.7148894 | 482.4242329 | 550.8397073 |             |   |
| 587.4752931 |             |             |             |             |             |   |
| CNR2        | CNR2        | 2.083356377 | 0           | 12.2656615  | 1.961520177 |   |
| TRAPPC13    | TRAPPC13    | 2505.236044 | 1989.559793 |             |             |   |
| 2018.258847 | 1689.849633 |             |             |             |             |   |
| BANF1       | BANF1       | 6154.234739 | 6309.369484 | 5286.500106 |             |   |
| 5813.945806 |             |             |             |             |             |   |
| FAM180B     | FAM180B     | 4.166712755 | 0           | 0           | 0           |   |
| OR2A9P      | OR2A9P      | 7.291747321 | 1.760672383 | 3.345180409 | 0           |   |
| GTF2H5      | GTF2H5      | 2487.527515 | 2129.533247 | 1916.788374 |             |   |
| 1636.888588 |             |             |             |             |             |   |
| OR2L1P      | OR2L1P      | 0           | 0           | 4.903800443 |             |   |
| SNORA48     | SNORA48     | 78.12586415 | 60.74319721 | 82.51445008 |             |   |
| 87.28764789 |             |             |             |             |             |   |
| TRAPPC2P1   | TRAPPC2P1   | 358.3372969 | 442.8091043 |             |             |   |
| 517.3879032 | 458.0149614 |             |             |             |             |   |
| AC0T1       | AC0T1       | 259.377869  | 46.65781815 | 237.507809  |             |   |
| 74.53776674 |             |             |             |             |             |   |
| C1orf141    | C1orf141    | 0           | 9.683698106 | 0           |             |   |
| 6.865320621 |             |             |             |             |             |   |
| ATP5EP2     | ATP5EP2     | 20.83356377 | 79.23025723 | 15.61084191 |             |   |
| 45.11496408 |             |             |             |             |             |   |
| AGBL3       | AGBL3       | 82.29257691 | 68.66622293 | 95.89517172 |             |   |
| 86.3068878  |             |             |             |             |             |   |
| TDH         | TDH         | 0           | 2.641008574 | 0           | 12.74988115 |   |
| SCARNA11    | SCARNA11    | 0           | 0.880336191 | 0           | 0           | 0 |
| RNY5        | RNY5        | 0           | 0.880336191 | 0           | 0           |   |
| ARHGEF35    | ARHGEF35    | 75.00082959 | 72.1875677  |             |             |   |
| 62.44336763 | 64.73016585 |             |             |             |             |   |
| OXNAD1      | OXNAD1      | 3173.993441 | 2262.464012 | 2851.208768 |             |   |
| 2317.53609  |             |             |             |             |             |   |
| C11orf16    | C11orf16    | 11.45846008 | 7.042689532 |             |             |   |
| 4.460240545 | 8.826840798 |             |             |             |             |   |
| JPH1        | JPH1        | 1.041678189 | 0           | 12.2656615  | 4.903800443 |   |
| UNC5B       | UNC5B       | 0           | 0           | 62.44336763 | 0           |   |
| CLSTN2-AS1  | CLSTN2-AS1  | 0           | 0           | 0           | 3.923040355 |   |
| CCDC115     | CCDC115     | 3312.53664  | 2144.498962 | 4949.751945 |             |   |



|             |           |             |             |             |             |
|-------------|-----------|-------------|-------------|-------------|-------------|
| 3495.428956 |           |             |             |             |             |
| SMAD1-AS2   | SMAD1-AS2 | 0           | 6.16235334  | 0           |             |
| 1.961520177 |           |             |             |             |             |
| RAVER2      | RAVER2    | 68.75076045 | 213.9216945 | 131.5770961 |             |
| 329.5353898 |           |             |             |             |             |
| TTC37       | TTC37     | 5972.982734 | 5136.761677 | 4542.754995 |             |
| 5191.163149 |           |             |             |             |             |
| NOD1        | NOD1      | 828.13416   | 838.9603904 | 1173.043263 |             |
| 1015.086692 |           |             |             |             |             |
| LDHB        | LDHB      | 64420.50422 | 58744.83405 | 52512.64206 |             |
| 61275.92882 |           |             |             |             |             |
| TMEM200C    | TMEM200C  | 0           | 0           | 0           | 0.980760089 |
| SLC5A10     | SLC5A10   | 180.2103266 | 220.9643841 | 228.5873279 |             |
| 265.785984  |           |             |             |             |             |
| HMBOX1      | HMBOX1    | 1371.890175 | 1111.86461  | 1810.857661 |             |
| 1249.488353 |           |             |             |             |             |
| C7orf71     | C7orf71   | 0           | 0           | 0           | 1.961520177 |
| ANKRD32     | ANKRD32   | 1558.35057  | 1692.886496 | 911.0041313 |             |
| 1016.067452 |           |             |             |             |             |
| MED10       | MED10     | 3947.960335 | 2953.527922 | 4733.430278 |             |
| 3284.565537 |           |             |             |             |             |
| OGFOD1      | OGFOD1    | 7901.129061 | 5661.442047 | 7343.786057 |             |
| 7486.141757 |           |             |             |             |             |
| SNPH        | SNPH      | 185.4187176 | 278.1862365 | 525.1933242 |             |
| 404.0731565 |           |             |             |             |             |
| CCAR2       | CCAR2     | 11541.79433 | 10227.74587 | 9704.368366 |             |
| 9546.718703 |           |             |             |             |             |
| C1S         | C1S       | 2.083356377 | 19.36739621 | 0           | 11.76912106 |
| EPHA4       | EPHA4     | 28.12531109 | 135.5717735 | 236.3927489 |             |
| 133.3833721 |           |             |             |             |             |
| SLC12A7     | SLC12A7   | 741.6748704 | 1705.211203 | 860.8264252 |             |
| 770.8774297 |           |             |             |             |             |
| HCG9        | HCG9      | 0           | 1.760672383 | 0           | 1.961520177 |
| ALDH1L1     | ALDH1L1   | 1.041678189 | 0           | 0           | 0           |
| CAPZB       | CAPZB     | 15020.99948 | 18717.7081  | 10561.84961 |             |
| 12281.07783 |           |             |             |             |             |
| TRMT2A      | TRMT2A    | 5443.810214 | 4004.649335 | 4230.538157 |             |
| 5030.318495 |           |             |             |             |             |
| ZNF543      | ZNF543    | 572.9230038 | 537.0050768 | 787.2324562 |             |
| 562.9562909 |           |             |             |             |             |
| HNRNPH3     | HNRNPH3   | 10808.45289 | 11115.12475 | 12003.62237 |             |
| 10320.53841 |           |             |             |             |             |
| RIN1        | RIN1      | 12.50013826 | 14.96571525 | 76.9391494  |             |
| 42.17268381 |           |             |             |             |             |
| ACVR1B      | ACVR1B    | 29.16698928 | 65.14487817 | 152.7632387 |             |
| 54.92256497 |           |             |             |             |             |
| ULBP1       | ULBP1     | 7.291747321 | 7.923025723 | 201.8258847 |             |
| 41.19192372 |           |             |             |             |             |
| ABCF3       | ABCF3     | 3633.373522 | 2647.170928 | 4169.209849 |             |
| 3855.367909 |           |             |             |             |             |

|              |              |             |             |             |             |
|--------------|--------------|-------------|-------------|-------------|-------------|
| GKAP1        | GKAP1        | 48.95887487 | 100.3583258 | 211.8614259 |             |
| 141.2294528  |              |             |             |             |             |
| PAG1         | PAG1         | 7049.036303 | 7187.064667 | 7565.683025 |             |
| 6184.673119  |              |             |             |             |             |
| UTP6         | UTP6         | 5906.31533  | 4208.887331 | 5100.285063 |             |
| 5212.739871  |              |             |             |             |             |
| LHFPL3       | LHFPL3       | 1.041678189 | 3.521344766 | 0           | 0           |
| DCK          | DCK          | 9462.604666 | 10485.68438 | 9629.659337 |             |
| 7553.814203  |              |             |             |             |             |
| DBH          | DBH          | 0           | 0           | 4.460240545 | 3.923040355 |
| PDE3A        | PDE3A        | 0           | 0           | 0           | 9.807600887 |
| CTDNEP1      | CTDNEP1      | 1213.55509  | 3011.630111 | 1699.351648 |             |
| 1518.216617  |              |             |             |             |             |
| EDEM2        | EDEM2        | 3176.076797 | 2493.99243  | 2294.79376  |             |
| 2465.630863  |              |             |             |             |             |
| PLET1        | PLET1        | 7.291747321 | 1.760672383 | 2.230120273 |             |
| 4.903800443  |              |             |             |             |             |
| SNHG21       | SNHG21       | 327.0869513 | 235.9300993 | 296.6059962 |             |
| 277.5551051  |              |             |             |             |             |
| CDH3         | CDH3         | 7.291747321 | 48.41849053 | 0           | 27.46128248 |
| UVRAG        | UVRAG        | 1325.014656 | 1102.180912 | 2265.802197 |             |
| 1532.928019  |              |             |             |             |             |
| TNR          | TNR          | 2.083356377 | 7.923025723 | 0           | 2.942280266 |
| NAGPA-AS1    | NAGPA-AS1    |             | 77.08418596 | 39.61512861 |             |
| 132.6921562  |              |             |             |             |             |
| 73.55700665  |              |             |             |             |             |
| LOC100288570 | LOC100288570 |             | 0           | 0           | 2.230120273 |
| RAPGEF2      | RAPGEF2      | 198.960534  | 581.9022225 | 276.5349138 | 0           |
| 143.1909729  |              |             |             |             |             |
| SNORA56      | SNORA56      | 2.083356377 | 10.5640343  | 39.02710477 |             |
| 22.55748204  |              |             |             |             |             |
| NLRP14       | NLRP14       | 0           | 3.521344766 | 0           | 2.942280266 |
| LINC01123    | LINC01123    |             | 0           | 1.760672383 | 4.460240545 |
| 4.903800443  |              |             |             |             |             |
| TENM2        | TENM2        | 0           | 0           | 0           | 9.807600887 |
| RFC5         | RFC5         | 5345.892464 | 5500.340524 | 3686.38881  |             |
| 5263.739396  |              |             |             |             |             |
| LOC100129216 | LOC100129216 |             | 16.66685102 | 11.44437049 |             |
| 6.690360818  |              |             |             |             |             |
| 12.74988115  |              |             |             |             |             |
| WBP5         | WBP5         | 14.58349464 | 73.94824008 | 137.1523968 |             |
| 102.9798093  |              |             |             |             |             |
| RNF217-AS1   | RNF217-AS1   |             | 0           | 1.760672383 | 2.230120273 |
| 5.884560532  |              |             |             |             |             |
| AKR1C6P      | AKR1C6P      | 6.250069132 | 13.20504287 | 0           | 4.903800443 |
| C6orf57      | C6orf57      | 269.7946509 | 388.2282604 | 304.4114172 |             |
| 302.0741073  |              |             |             |             |             |
| CASKIN1      | CASKIN1      | 103.1261407 | 154.0588335 | 107.0457731 |             |
| 85.32612771  |              |             |             |             |             |
| FAM96A       | FAM96A       | 6031.316713 | 7048.851885 | 4931.910983 |             |
| 4818.474316  |              |             |             |             |             |
| ZCCHC7       | ZCCHC7       | 1102.095524 | 957.8057763 | 1885.56669  |             |

|              |              |             |             |             |             |   |
|--------------|--------------|-------------|-------------|-------------|-------------|---|
| 1450.544171  |              |             |             |             |             |   |
| GPR137C      | GPR137C      | 36.4587366  | 45.77748195 | 14.49578177 |             |   |
| 30.40356275  |              |             |             |             |             |   |
| ZNF582-AS1   | ZNF582-AS1   |             | 23.95859834 | 24.64941336 |             |   |
| 214.0915462  | 102.9798093  |             |             |             |             |   |
| PPAP2A       | PPAP2A       | 2627.112392 | 1522.101275 | 2201.128709 |             |   |
| 1672.195951  |              |             |             |             |             |   |
| ZNF92        | ZNF92        | 1137.512582 | 1423.503622 | 1597.881175 |             |   |
| 1166.123745  |              |             |             |             |             |   |
| SIDT2        | SIDT2        | 142.7099119 | 208.6396774 | 144.9578177 |             |   |
| 149.0755335  |              |             |             |             |             |   |
| MYL6         | MYL6         | 85600.94683 | 76064.56828 | 42240.70808 |             |   |
| 54077.14977  |              |             |             |             |             |   |
| LINC01011    | LINC01011    |             | 41.66712755 | 36.09378385 |             |   |
| 147.187938   | 111.8066501  |             |             |             |             |   |
| LOC646736    | LOC646736    |             | 0           | 0           | 3.345180409 | 0 |
| MIR548Z      | MIR548Z      | 0           | 2.641008574 | 0           | 0.980760089 |   |
| MIR550B1     | MIR550B1     |             | 0           | 1.760672383 | 0           | 0 |
| LINC01061    | LINC01061    |             | 78.12586415 | 132.9307649 |             |   |
| 121.5415549  | 81.40308736  |             |             |             |             |   |
| CAHM         | CAHM         | 4.166712755 | 3.521344766 | 2.230120273 |             |   |
| 12.74988115  |              |             |             |             |             |   |
| YIPF1        | YIPF1        | 1714.602299 | 1403.255889 | 1440.657696 |             |   |
| 1505.466736  |              |             |             |             |             |   |
| LINC01134    | LINC01134    |             | 6.250069132 | 25.52974955 |             |   |
| 6.690360818  | 10.78836098  |             |             |             |             |   |
| LOC100134368 | LOC100134368 |             | 0           | 0.880336191 | 36.7969845  |   |
| 6.865320621  |              |             |             |             |             |   |
| GUSBP11      | GUSBP11      | 338.5454113 | 528.2017149 | 508.4674221 |             |   |
| 501.1684053  |              |             |             |             |             |   |
| FAM66C       | FAM66C       | 16.66685102 | 23.76907717 | 39.02710477 |             |   |
| 47.07648426  |              |             |             |             |             |   |
| MAP3K14-AS1  | MAP3K14-AS1  |             | 359.3789751 | 462.1765005 |             |   |
| 441.563814   | 541.3795689  |             |             |             |             |   |
| LINC00086    | LINC00086    |             | 6.250069132 | 31.69210289 |             |   |
| 40.14216491  | 69.6339663   |             |             |             |             |   |
| RBPMS        | RBPMS        | 23.95859834 | 8.803361914 | 16.72590204 |             |   |
| 13.73064124  |              |             |             |             |             |   |
| ZNF341-AS1   | ZNF341-AS1   |             | 11.45846008 | 8.803361914 |             |   |
| 8.92048109   | 10.78836098  |             |             |             |             |   |
| OR1L8        | OR1L8        | 0           | 2.641008574 | 0           | 0           |   |
| ZNF362       | ZNF362       | 795.8421362 | 1297.615546 | 647.8499392 |             |   |
| 967.0294474  |              |             |             |             |             |   |
| TONSL        | TONSL        | 2165.648954 | 2935.040862 | 1417.241433 |             |   |
| 2119.422552  |              |             |             |             |             |   |
| NT5C1B-RDH14 | NT5C1B-RDH14 |             | 1126.054122 | 910.2676219 |             |   |
| 1721.65285   | 1282.834196  |             |             |             |             |   |
| NPTX1        | NPTX1        | 2576.070161 | 4246.741787 | 388.0409274 |             |   |
| 717.9163849  |              |             |             |             |             |   |
| ESRG         | ESRG         | 0           | 0           | 0           | 0.980760089 |   |

|              |              |             |             |
|--------------|--------------|-------------|-------------|
| SLC25A17     | SLC25A17     | 3536.497451 | 2390.993096 |
| 2720.746732  | 2528.399509  |             |             |
| MIR1224      | MIR1224      | 0           | 0.880336191 |
| GSTM2        | GSTM2        | 170.8352229 | 356.5361575 |
| 302.0741073  |              |             | 111.5060136 |
| ANXA1        | ANXA1        | 4849.011968 | 3512.541404 |
| 6394.555778  |              |             | 7884.590224 |
| LRRC6        | LRRC6        | 3.125034566 | 6.16235334  |
| 22.55748204  |              |             | 17.84096218 |
| TRPC5        | TRPC5        | 1.041678189 | 2.641008574 |
| PRPF6        | PRPF6        | 11419.91798 | 8645.781736 |
| 10171.46288  |              |             | 10656.62972 |
| SLC22A31     | SLC22A31     | 15.62517283 | 42.25613719 |
| 2.230120273  | 39.23040355  |             |             |
| RNPS1        | RNPS1        | 25007.56828 | 17609.36484 |
| 19966.31389  |              |             | 21060.14079 |
| ANO4         | ANO4         | 0           | 0           |
| SDS          | SDS          | 0           | 1.760672383 |
| RAMP2        | RAMP2        | 3.125034566 | 0           |
| MACC1        | MACC1        | 17.70852921 | 34.33311147 |
| 53.94180488  |              |             | 5.575300681 |
| ACYP1        | ACYP1        | 1028.136372 | 927.8743458 |
| 765.9736292  |              |             | 622.203556  |
| GMCL1P1      | GMCL1P1      | 2.083356377 | 0.880336191 |
| SUGT1P3      | SUGT1P3      | 18.7502074  | 33.45277527 |
| 61.78788559  |              |             | 33.45180409 |
| PRODH        | PRODH        | 68.75076045 | 71.30723151 |
| 26.48052239  |              |             | 8.92048109  |
| YKT6         | YKT6         | 3365.662228 | 3761.676546 |
| 2652.95604   |              |             | 3183.496689 |
| GLYATL3      | GLYATL3      | 0           | 0           |
| C6orf222     | C6orf222     | 0           | 0.880336191 |
| 18.63444168  |              |             | 36.7969845  |
| SOX7         | SOX7         | 26.04195472 | 28.17075813 |
| 13.73064124  |              |             | 46.83252572 |
| UGT1A8       | UGT1A8       | 0           | 0           |
| THAP2        | THAP2        | 378.1291825 | 347.7327956 |
| 475.668643   |              |             | 831.8348617 |
| LOC101927460 | LOC101927460 | 0           | 0           |
| PPM1G        | PPM1G        | 15982.46845 | 12195.29726 |
| 10987.45527  |              |             | 10966.61644 |
| WDFY3        | WDFY3        | 11.45846008 | 84.51227438 |
| 51.9802847   |              |             | 15.61084191 |
| GOLGA2P6     | GOLGA2P6     | 0           | 1.760672383 |
| 3.923040355  |              |             | 0           |
| CNIH3        | CNIH3        | 3.125034566 | 2.641008574 |
| 6.865320621  |              |             | 8.92048109  |
| COQ9         | COQ9         | 4127.128984 | 2681.504039 |
| 3036.433235  |              |             | 2803.261183 |
| ATP13A4      | ATP13A4      | 31.25034566 | 50.17916291 |
|              |              |             | 3.345180409 |

|              |              |             |             |             |   |   |
|--------------|--------------|-------------|-------------|-------------|---|---|
| 29.42280266  |              |             |             |             |   |   |
| C5AR2        | C5AR2        | 2.083356377 | 5.282017149 | 0           | 0 |   |
| ASAP1        | ASAP1        | 1037.511476 | 1546.750688 | 1627.987799 |   |   |
| 1559.408541  |              |             |             |             |   |   |
| PDCD1LG2     | PDCD1LG2     |             | 356.2539405 | 301.9553137 |   |   |
| 117.0813143  |              | 245.1900222 |             |             |   |   |
| ERC2         | ERC2         | 2.083356377 | 17.60672383 | 0           | 0 |   |
| REL          | REL          | 1273.972425 | 1341.632356 | 2758.658777 |   |   |
| 2623.533237  |              |             |             |             |   |   |
| SSH3         | SSH3         | 116.6679571 | 272.9042193 | 179.5246819 |   |   |
| 375.631114   |              |             |             |             |   |   |
| C8orf44-SGK3 | C8orf44-SGK3 |             | 398.9627463 | 312.519348  |   |   |
| 2182.172687  |              | 855.2227973 |             |             |   |   |
| SLC44A5      | SLC44A5      | 0           | 0           | 2.230120273 | 0 |   |
| RTCA         | RTCA         | 7388.623392 | 5008.232593 | 4132.412865 |   |   |
| 3993.655081  |              |             |             |             |   |   |
| CLK3         | CLK3         | 4749.010862 | 4389.356251 | 4987.66399  |   |   |
| 5027.376215  |              |             |             |             |   |   |
| ADAMDEC1     | ADAMDEC1     |             | 0           | 0.880336191 | 0 |   |
| 0.980760089  |              |             |             |             |   |   |
| LOC100133669 | LOC100133669 |             | 37.50041479 | 47.53815434 |   |   |
| 76.9391494   |              | 65.71092594 |             |             |   |   |
| ZNF510       | ZNF510       | 326.0452731 | 372.382209  | 793.922817  |   |   |
| 372.6888337  |              |             |             |             |   |   |
| C3AR1        | C3AR1        | 520.8390943 | 191.9132897 | 446.0240545 |   |   |
| 384.4579548  |              |             |             |             |   |   |
| PPY          | PPY          | 0           | 1.760672383 | 5.575300681 | 0 |   |
| RPS6KB2      | RPS6KB2      | 4990.680202 | 4402.561293 | 4510.418251 |   |   |
| 4602.707096  |              |             |             |             |   |   |
| CDS1         | CDS1         | 6.250069132 | 1.760672383 | 45.71746559 |   | 0 |
| EXOC5        | EXOC5        | 7201.121318 | 7077.022643 | 5860.756076 |   |   |
| 6675.053163  |              |             |             |             |   |   |
| CIC          | CIC          | 55.208944   | 459.5354919 | 181.7548022 |   |   |
| 176.536816   |              |             |             |             |   |   |
| C2orf82      | C2orf82      | 0           | 1.760672383 | 0           | 0 |   |
| USF1         | USF1         | 405.2128154 | 983.3355258 | 751.5505318 |   |   |
| 565.8985712  |              |             |             |             |   |   |
| BMP1         | BMP1         | 91.66768061 | 150.5374887 | 239.7379293 |   |   |
| 149.0755335  |              |             |             |             |   |   |
| FAM83H-AS1   | FAM83H-AS1   |             | 0           | 6.16235334  | 0 |   |
| 6.865320621  |              |             |             |             |   |   |
| LOC100507373 | LOC100507373 |             | 51.04223125 | 61.6235334  |   |   |
| 107.0457731  |              | 42.17268381 |             |             |   |   |
| PLBD1-AS1    | PLBD1-AS1    |             | 1.041678189 | 0           | 0 | 0 |
| C12orf45     | C12orf45     |             | 1037.511476 | 770.2941675 |   |   |
| 965.642078   |              | 711.0510643 |             |             |   |   |
| ARL14EP      | ARL14EP      | 2338.567534 | 1900.645837 | 2532.301569 |   |   |
| 1874.232529  |              |             |             |             |   |   |
| LILRB3       | LILRB3       | 31.25034566 | 34.33311147 | 35.68192436 |   |   |
| 51.9802847   |              |             |             |             |   |   |

|             |             |             |             |             |
|-------------|-------------|-------------|-------------|-------------|
| NUDCD3      | NUDCD3      | 5153.181999 | 4763.499132 | 5455.989247 |
| 6287.652928 |             |             |             |             |
| RHBDL2      | RHBDL2      | 9.375103698 | 13.20504287 | 22.30120273 |
| 18.63444168 |             |             |             |             |
| LOC653786   | LOC653786   |             | 1.041678189 | 0           |
|             | 0.980760089 |             |             | 1.115060136 |
| ALMS1P      | ALMS1P      | 0           | 0           | 0.980760089 |
| TFE3        | TFE3        | 1486.474775 | 2790.665727 | 2154.296183 |
| 1690.830393 |             |             |             |             |
| ANKUB1      | ANKUB1      | 0           | 0.880336191 | 0           |
| FCER1G      | FCER1G      | 476.0469322 | 104.7600068 | 273.1897334 |
| 199.094298  |             |             |             |             |
| EIF4EBP1    | EIF4EBP1    |             | 2319.817326 | 2081.114757 |
| 2081.817274 | 2042.923265 |             |             |             |
| SIM2        | SIM2        | 8.33342551  | 7.042689532 | 2.230120273 |
| 1.961520177 |             |             |             |             |
| FASN        | FASN        | 180.2103266 | 1600.451196 | 301.0662368 |
| 490.3800443 |             |             |             |             |
| CHURC1      | CHURC1      | 6061.52538  | 5719.544236 | 9249.42383  |
| 6580.900195 |             |             |             |             |
| SPATA21     | SPATA21     | 9.375103698 | 9.683698106 | 15.61084191 |
| 10.78836098 |             |             |             |             |
| ATP11A      | ATP11A      | 1408.348911 | 2677.102358 | 1290.124578 |
| 1757.522079 |             |             |             |             |
| MY01D       | MY01D       | 297.919962  | 308.117667  | 719.2137879 |
| 918.9722031 |             |             |             |             |
| NLN         | NLN         | 2153.148816 | 1565.237748 | 1816.432962 |
| 1950.731816 |             |             |             |             |
| KIAA1210    | KIAA1210    |             | 0           | 0           |
| TIPARP-AS1  | TIPARP-AS1  |             | 143.75159   | 141.7341268 |
| 158.3385393 | 101.0182891 |             |             |             |
| TMEM182     | TMEM182     | 183.3353612 | 153.1784973 | 361.2794842 |
| 359.9389525 |             |             |             |             |
| OR52K2      | OR52K2      | 0           | 0           | 0.980760089 |
| UNK         | UNK         | 1094.803776 | 1305.538572 | 1371.523968 |
| 1152.393104 |             |             |             |             |
| FAM175B     | FAM175B     | 2277.10852  | 1591.647834 | 1900.062472 |
| 1780.079561 |             |             |             |             |
| CRTAC1      | CRTAC1      | 0           | 0.880336191 | 1.115060136 |
|             |             |             |             | 7.846080709 |
| C1orf216    | C1orf216    |             | 3534.414094 | 2561.778317 |
| 2048.36547  | 2337.151291 |             |             |             |
| UTP15       | UTP15       | 3292.744754 | 2646.290591 | 2971.635263 |
| 3482.679075 |             |             |             |             |
| USP42       | USP42       | 1304.181092 | 1701.689858 | 2380.653391 |
| 1573.139182 |             |             |             |             |
| C2orf76     | C2orf76     | 409.3795282 | 367.1001918 | 490.62646   |
| 407.0154368 |             |             |             |             |
| ANO3        | ANO3        | 0           | 1.115060136 | 0           |
| R3HDM4      | R3HDM4      | 4678.176745 | 5778.526761 | 4427.903801 |
| 5975.77122  |             |             |             |             |

|              |              |             |             |             |             |
|--------------|--------------|-------------|-------------|-------------|-------------|
| GRM2         | GRM2         | 2.083356377 | 3.521344766 | 0           | 0           |
| MIR626       | MIR626       | 1.041678189 | 0           | 0           | 0           |
| MIR624       | MIR624       | 0           | 0.880336191 | 0           | 0           |
| LOC100506083 | LOC100506083 |             | 954.1772208 |             | 776.4565208 |
| 767.1613738  |              | 756.1660284 |             |             |             |
| ATXN1        | ATXN1        | 1041.678189 | 1449.913707 |             | 1004.669183 |
| 776.7619902  |              |             |             |             |             |
| TMC6         | TMC6         | 7898.004027 | 7769.847226 |             | 5217.366378 |
| 6617.188318  |              |             |             |             |             |
| TMEM2        | TMEM2        | 4145.879191 | 5357.726061 |             | 1563.314311 |
| 1666.311391  |              |             |             |             |             |
| KIF26A       | KIF26A       | 0           | 0.880336191 | 0           | 3.923040355 |
| CECR5        | CECR5        | 2788.572511 | 2192.037117 |             | 2866.81961  |
| 3632.735368  |              |             |             |             |             |
| PEAK1        | PEAK1        | 480.213645  | 542.2870939 |             | 386.9258673 |
| 362.8812328  |              |             |             |             |             |
| MRPS24       | MRPS24       | 3405.245999 | 3178.013651 |             | 2934.838279 |
| 2695.128724  |              |             |             |             |             |
| C1QTNF4      | C1QTNF4      | 3.125034566 | 0.880336191 | 0           | 0.980760089 |
| PTRF         | PTRF         | 54.16726581 | 29.93143051 |             | 85.85963049 |
| 138.2871725  |              |             |             |             |             |
| UQCRC2       | UQCRC2       | 17478.31833 | 16738.71234 |             | 9392.151528 |
| 11775.00562  |              |             |             |             |             |
| KIF1A        | KIF1A        | 0           | 0           | 1.115060136 | 21.57672195 |
| BCL9         | BCL9         | 405.2128154 | 880.3361914 |             | 732.5945095 |
| 961.1448869  |              |             |             |             |             |
| RAB11FIP4    | RAB11FIP4    |             | 2307.317188 |             | 2104.883834 |
| 3169.000907  |              | 3006.029672 |             |             |             |
| IGJ          | IGJ          | 254.169478  | 160.2211868 |             | 4.460240545 |
| 122.5950111  |              |             |             |             |             |
| RHOBTB3      | RHOBTB3      | 56.25062219 | 110.9223601 |             | 99.24035213 |
| 97.09524878  |              |             |             |             |             |
| UNC45A       | UNC45A       | 6988.618968 | 6360.428983 |             | 5197.295295 |
| 6225.865043  |              |             |             |             |             |
| COR06        | COR06        | 23.95859834 | 75.70891246 |             | 79.16926967 |
| 101.9990492  |              |             |             |             |             |
| MUM1         | MUM1         | 1012.511199 | 1271.20546  |             | 1038.120987 |
| 1340.699041  |              |             |             |             |             |
| SBSPON       | SBSPON       | 1.041678189 | 7.042689532 |             | 5.575300681 |
| 0.980760089  |              |             |             |             |             |
| KRT3         | KRT3         | 4.166712755 | 0           | 0           | 0           |
| TAGAP        | TAGAP        | 2271.90013  | 2240.455607 |             | 7701.720361 |
| 7846.080709  |              |             |             |             |             |
| ASXL2        | ASXL2        | 687.5076045 | 1552.032706 |             | 1624.642619 |
| 1006.259851  |              |             |             |             |             |
| DARS2        | DARS2        | 5670.896059 | 4879.703509 |             | 4104.536362 |
| 5405.949609  |              |             |             |             |             |
| ZNF791       | ZNF791       | 2045.855963 | 1482.486146 |             | 2421.910616 |
| 1946.808776  |              |             |             |             |             |
| SCAP         | SCAP         | 5100.056412 | 5593.65616  |             | 4352.079712 |

|              |              |             |             |             |   |
|--------------|--------------|-------------|-------------|-------------|---|
| 5624.659109  |              |             |             |             |   |
| ARFIP2       | ARFIP2       | 2089.606447 | 2149.780979 | 2721.861793 |   |
| 2487.207585  |              |             |             |             |   |
| FZD4         | FZD4         | 27.08363291 | 65.14487817 | 13.38072164 |   |
| 4.903800443  |              |             |             |             |   |
| GRHPR        | GRHPR        | 2969.824516 | 2460.539655 | 2812.181664 |   |
| 3039.375515  |              |             |             |             |   |
| ZNF525       | ZNF525       | 392.7126771 | 644.4060921 | 1407.205892 |   |
| 1161.219945  |              |             |             |             |   |
| AQP7         | AQP7         | 1.041678189 | 0           | 1.961520177 |   |
| HTRA1        | HTRA1        | 1.041678189 | 0.880336191 | 8.92048109  | 0 |
| IFNL4        | IFNL4        | 1.041678189 | 1.760672383 | 4.460240545 |   |
| 1.961520177  |              |             |             |             |   |
| C5orf66      | C5orf66      | 4286.505746 | 3516.062749 | 2207.81907  |   |
| 2734.359127  |              |             |             |             |   |
| FZR1         | FZR1         | 1406.265555 | 2401.55713  | 1208.725188 |   |
| 1429.948209  |              |             |             |             |   |
| LOC100129316 | LOC100129316 |             | 0           | 1.760672383 | 0 |
| 3.923040355  |              |             |             |             |   |
| C15orf37     | C15orf37     |             | 351.0455496 | 407.5956566 |   |
| 274.3047935  | 372.6888337  |             |             |             |   |
| LAMTOR2      | LAMTOR2      | 3196.910361 | 3097.903058 | 2607.010599 |   |
| 2774.570291  |              |             |             |             |   |
| POLR2G       | POLR2G       | 7081.328327 | 7606.98503  | 5909.818722 |   |
| 6615.226798  |              |             |             |             |   |
| P4HB         | P4HB         | 36134.77469 | 25282.37508 | 24550.27902 |   |
| 23499.01172  |              |             |             |             |   |
| MSL1         | MSL1         | 502.088887  | 983.3355258 | 606.5927141 |   |
| 545.3026093  |              |             |             |             |   |
| LOC100507195 | LOC100507195 |             | 30.20866747 | 82.751602   |   |
| 74.70902913  | 134.3641321  |             |             |             |   |
| LOC101928988 | LOC101928988 |             | 8.33342551  | 20.2477324  |   |
| 1.115060136  | 11.76912106  |             |             |             |   |
| ZC3H12C      | ZC3H12C      | 76.04250777 | 226.2464012 | 50.17770613 |   |
| 87.28764789  |              |             |             |             |   |
| NAALAD2      | NAALAD2      | 2.083356377 | 2.641008574 | 8.92048109  |   |
| 2.942280266  |              |             |             |             |   |
| SLC17A7      | SLC17A7      | 0           | 0.880336191 | 7.805420954 | 0 |
| SNTN         | SNTN         | 0           | 0           | 1.115060136 | 0 |
| KRT86        | KRT86        | 22.91692015 | 7.923025723 | 6.690360818 |   |
| 3.923040355  |              |             |             |             |   |
| ACTR1A       | ACTR1A       | 8157.381896 | 9568.374065 | 6035.820518 |   |
| 6686.822285  |              |             |             |             |   |
| ADAMTS3      | ADAMTS3      | 0           | 0           | 1.961520177 |   |
| PPP1R7       | PPP1R7       | 6239.65235  | 5502.981533 | 5174.994092 |   |
| 5580.524905  |              |             |             |             |   |
| PARP4        | PARP4        | 11959.50728 | 13227.93161 | 7468.672793 |   |
| 8294.28807   |              |             |             |             |   |
| HEXIM1       | HEXIM1       | 673.9657881 | 672.5768503 | 766.0463136 |   |
| 683.5897818  |              |             |             |             |   |



|              |              |             |             |             |             |
|--------------|--------------|-------------|-------------|-------------|-------------|
| EREG         | EREG         | 0           | 2.641008574 | 0           | 0           |
| NDST1        | NDST1        | 33.33370204 | 148.7768164 | 43.48734531 | 118.6719707 |
| HIST1H2AK    | HIST1H2AK    | 48.95887487 | 49.29882672 | 45.71746559 | 34.3266031  |
| HIST1H2AI    | HIST1H2AI    | 67.70908227 | 114.4437049 | 43.48734531 | 27.46128248 |
| FZD9         | FZD9         | 10.41678189 | 15.84605145 | 18.95602232 | 22.55748204 |
| GCM1         | GCM1         | 0           | 0           | 1.115060136 | 1.961520177 |
| TALD01       | TALD01       | 18469.99596 | 15762.41951 | 13844.58665 | 12285.98163 |
| GRSF1        | GRSF1        | 13179.31244 | 10239.19024 | 11963.4802  | 12066.29137 |
| ARHGAP5      | ARHGAP5      | 1000.011061 | 1236.872349 | 2799.916002 | 1891.886211 |
| LOC100996437 | LOC100996437 | 22.91692015 | 20.2477324  | 24.531323   | 43.1534439  |
| PLA2G16      | PLA2G16      | 755.2166868 | 683.1408846 | 396.9614085 | 516.8605667 |
| FAM50A       | FAM50A       | 3215.660569 | 3236.11584  | 2948.219    | 3037.413995 |
| ZNF24        | ZNF24        | 4005.252636 | 4152.545815 | 6406.020483 | 5285.316118 |
| PDCD5        | PDCD5        | 7354.248012 | 5731.868942 | 5965.571729 | 5582.486425 |
| HGS          | HGS          | 7228.204951 | 5665.843728 | 5954.421128 | 6876.108982 |
| EIF2AK3      | EIF2AK3      | 2469.818985 | 2917.434138 | 2430.831097 | 2137.076233 |
| ZNF593       | ZNF593       | 1884.395843 | 1898.004829 | 1806.397421 | 2144.922314 |
| USP8         | USP8         | 4937.554614 | 3988.803283 | 4319.742968 | 3951.482397 |
| RUFY3        | RUFY3        | 229.1692015 | 211.2806859 | 652.3101797 | 457.0342013 |
| ZNF14        | ZNF14        | 856.2594711 | 747.4054265 | 2864.58949  | 1745.752958 |
| NTHL1        | NTHL1        | 1473.974637 | 1261.521762 | 633.3541574 | 936.6258847 |
| GOT2         | GOT2         | 19099.16959 | 14386.45404 | 12845.49277 | 14958.55287 |
| NPTX2        | NPTX2        | 0           | 6.16235334  | 0           | 14.71140133 |
| GLRX5        | GLRX5        | 4887.554061 | 4316.288347 | 3443.305701 | 3572.909003 |
| TRIAP1       | TRIAP1       | 5306.308693 | 2793.306735 | 4571.746559 | 3098.22112  |
| HSPB9        | HSPB9        | 0           | 0.880336191 | 1.115060136 | 1.961520177 |
| MIR6824      | MIR6824      | 27.08363291 | 39.61512861 | 16.72590204 | 36.28812328 |

|              |              |             |             |             |             |
|--------------|--------------|-------------|-------------|-------------|-------------|
| TMEM39A      | TMEM39A      | 3046.908702 | 1912.970544 | 2840.058167 |             |
| 2286.151767  |              |             |             |             |             |
| DLG5         | DLG5         | 85.41761147 | 285.228926  | 41.25722504 |             |
| 97.09524878  |              |             |             |             |             |
| ANKRD63      | ANKRD63      | 0           | 0.880336191 | 0           |             |
| TGFBRAP1     | TGFBRAP1     |             | 3608.373246 | 3187.697349 |             |
| 3657.397247  |              | 3208.06625  |             |             |             |
| FAM110B      | FAM110B      | 26.04195472 | 41.375801   | 20.07108245 |             |
| 13.73064124  |              |             |             |             |             |
| TNFRSF10B    | TNFRSF10B    |             | 2931.282423 | 1450.794043 |             |
| 5858.525956  |              | 3108.028721 |             |             |             |
| GALR2        | GALR2        | 232.2942361 | 124.127403  | 175.0644414 |             |
| 176.536816   |              |             |             |             |             |
| MTF1         | MTF1         | 2754.197131 | 2177.071401 | 3032.963571 |             |
| 2531.341789  |              |             |             |             |             |
| GOLT1B       | GOLT1B       | 6309.444789 | 5054.890411 | 4308.592367 |             |
| 4417.343439  |              |             |             |             |             |
| ZNF117       | ZNF117       | 167.7101884 | 205.1183326 | 176.1795015 |             |
| 232.440141   |              |             |             |             |             |
| MT3          | MT3          | 2.083356377 | 27.29042193 | 22.30120273 |             |
| 114.7489304  |              |             |             |             |             |
| NUP214       | NUP214       | 3395.870895 | 4865.61813  | 4793.643526 |             |
| 4381.055316  |              |             |             |             |             |
| GUCY2C       | GUCY2C       | 3.125034566 | 0           | 0.980760089 |             |
| SF3A3        | SF3A3        | 14529.32738 | 11038.5355  | 11891.00129 |             |
| 11506.27736  |              |             |             |             |             |
| PRRC2C       | PRRC2C       | 7270.913757 | 8736.456364 | 8529.094982 |             |
| 7744.08166   |              |             |             |             |             |
| FTCD         | FTCD         | 2.083356377 | 0           | 2.230120273 | 0.980760089 |
| ZNF783       | ZNF783       | 436.4631611 | 552.8511282 | 735.9396899 |             |
| 737.5315867  |              |             |             |             |             |
| TRMT61B      | TRMT61B      | 1175.012997 | 1126.830325 | 1019.164965 |             |
| 1384.833245  |              |             |             |             |             |
| NARFL        | NARFL        | 2623.987357 | 1907.688527 | 2159.871484 |             |
| 2244.959843  |              |             |             |             |             |
| TTC31        | TTC31        | 3545.872554 | 3091.740704 | 2318.210023 |             |
| 2628.437038  |              |             |             |             |             |
| BMS1P6       | BMS1P6       | 3.125034566 | 5.282017149 | 18.95602232 |             |
| 12.74988115  |              |             |             |             |             |
| LRRN1        | LRRN1        | 15.62517283 | 38.73479242 | 46.83252572 |             |
| 26.48052239  |              |             |             |             |             |
| C19orf68     | C19orf68     |             | 141.6682337 | 202.477324  |             |
| 91.43493117  |              | 142.2102129 |             |             |             |
| LINC01003    | LINC01003    |             | 117.7096353 | 230.6480822 |             |
| 182.8698623  |              | 258.9206634 |             |             |             |
| PATE4        | PATE4        | 1.041678189 | 0           | 1.961520177 |             |
| LOC102724589 | LOC102724589 |             | 0           | 3.521344766 | 0           |
| PTAR1        | PTAR1        | 435.4214829 | 635.6027302 | 557.5300681 |             |
| 494.3030847  |              |             |             |             |             |
| RPS3         | RPS3         | 35708.72831 | 34984.56025 | 38597.80662 |             |

|                 |              |             |             |             |             |
|-----------------|--------------|-------------|-------------|-------------|-------------|
| 35736.93611     |              |             |             |             |             |
| ACSBG1 ACSBG1   | 16.66685102  | 8.803361914 | 5.575300681 |             |             |
| 9.807600887     |              |             |             |             |             |
| TOR1A TOR1A     | 8550.094573  | 6527.69286  | 5470.485029 |             |             |
| 5875.733691     |              |             |             |             |             |
| MTMR2 MTMR2     | 5966.732665  | 5294.341855 | 4518.223672 |             |             |
| 5278.450797     |              |             |             |             |             |
| MMP17 MMP17     | 23.95859834  | 9.683698106 | 0           | 11.76912106 |             |
| TOP2A TOP2A     | 32248.27337  | 32496.73017 | 15778.10093 |             |             |
| 24682.78915     |              |             |             |             |             |
| ST18 ST18       | 0            | 1.760672383 | 0           | 0           |             |
| C2orf50 C2orf50 | 3.125034566  | 1.760672383 | 2.230120273 |             |             |
| 8.826840798     |              |             |             |             |             |
| ACVR2B-AS1      | ACVR2B-AS1   | 0           | 3.521344766 | 0           |             |
| 5.884560532     |              |             |             |             |             |
| HYMAI HYMAI     | 21.87524196  | 15.84605145 | 7.805420954 |             |             |
| 38.24964346     |              |             |             |             |             |
| HIST2H2BF       | HIST2H2BF    | 6.250069132 | 57.22185244 |             |             |
| 15.61084191     | 4.903800443  |             |             |             |             |
| COMMD3-BMI1     | COMMD3-BMI1  | 10376.15644 | 9468.896075 |             |             |
| 8894.834707     | 9411.373811  |             |             |             |             |
| SMLR1 SMLR1     | 2.083356377  | 0           | 0           | 0           |             |
| SMIM17 SMIM17   | 0            | 2.641008574 | 0           | 2.942280266 |             |
| RPS28 RPS28     | 3785.458538  | 7303.269044 | 5295.420587 |             |             |
| 6420.05554      |              |             |             |             |             |
| C19orf84        | C19orf84     | 0           | 0           | 0           | 4.903800443 |
| RPS27 RPS27     | 10160.52905  | 15215.73073 | 27250.95467 |             |             |
| 16886.72721     |              |             |             |             |             |
| PINLYP PINLYP   | 76.04250777  | 119.725722  | 31.22168382 |             |             |
| 94.15296851     |              |             |             |             |             |
| GARS GARS       | 21331.48595  | 15704.31732 | 21315.48956 |             |             |
| 17324.14621     |              |             |             |             |             |
| HSPE1-MOB4      | HSPE1-MOB4   | 15973.09335 | 12912.77126 |             |             |
| 16026.75934     | 15255.72318  |             |             |             |             |
| SH3BGRL SH3BGRL | 3718.791134  | 3839.146131 | 5014.425433 |             |             |
| 4221.191422     |              |             |             |             |             |
| MPZ MPZ         | 4.166712755  | 14.96571525 | 23.41626286 |             |             |
| 7.846080709     |              |             |             |             |             |
| GPC5 GPC5       | 3.125034566  | 0           | 18.95602232 | 24.51900222 |             |
| SNRNP40 SNRNP40 | 13589.73365  | 9491.784816 | 10134.78158 |             |             |
| 10575.53604     |              |             |             |             |             |
| AP4M1 AP4M1     | 740.6331922  | 1123.30898  | 547.4945269 |             |             |
| 1008.221371     |              |             |             |             |             |
| APEH APEH       | 10681.36815  | 8676.593503 | 7624.781212 |             |             |
| 10333.28829     |              |             |             |             |             |
| HLA-DQA1        | HLA-DQA1     | 622.9235568 | 2274.788719 |             |             |
| 183.9849225     | 571.7831317  |             |             |             |             |
| URGCP-MRPS24    | URGCP-MRPS24 | 3610.456602 | 3320.628114 |             |             |
| 3136.664163     | 2890.299981  |             |             |             |             |
| ZCRB1 ZCRB1     | 3846.917551  | 4468.586508 | 3548.121354 |             |             |

|             |          |             |             |             |             |
|-------------|----------|-------------|-------------|-------------|-------------|
| 3549.370761 |          |             |             |             |             |
| AARS2       | AARS2    | 2657.321059 | 2482.54806  | 2186.632927 |             |
| 2541.14939  |          |             |             |             |             |
| ZNF626      | ZNF626   | 323.9619167 | 251.7761508 | 927.7300334 |             |
| 414.8615175 |          |             |             |             |             |
| C5orf15     | C5orf15  | 3591.706395 | 2726.401185 | 3394.243055 |             |
| 2742.205208 |          |             |             |             |             |
| RPL26L1     | RPL26L1  | 2720.863429 | 2331.130235 | 1856.575127 |             |
| 1989.96222  |          |             |             |             |             |
| AEBP1       | AEBP1    | 76.04250777 | 212.1610221 | 240.8529894 |             |
| 335.4199503 |          |             |             |             |             |
| XCL1        | XCL1     | 283.3364673 | 102.1189982 | 1565.544431 |             |
| 654.1669791 |          |             |             |             |             |
| TMEM192     | TMEM192  | 947.9271517 | 635.6027302 | 1571.119732 |             |
| 1111.20118  |          |             |             |             |             |
| ZNF844      | ZNF844   | 52.08390943 | 44.01680957 | 579.8312709 |             |
| 320.708549  |          |             |             |             |             |
| C11orf86    | C11orf86 |             | 8.33342551  | 0           | 0           |
| MUC12       | MUC12    | 56.25062219 | 38.73479242 | 11.15060136 | 0           |
| 12.74988115 |          |             |             |             |             |
| PRR12       | PRR12    | 15.62517283 | 113.5633687 | 13.38072164 |             |
| 32.36508293 |          |             |             |             |             |
| PLXNA3      | PLXNA3   | 128.1264172 | 448.9714576 | 167.2590204 |             |
| 316.7855086 |          |             |             |             |             |
| NDUFAF7     | NDUFAF7  | 926.0519098 | 828.3963561 | 1073.802911 |             |
| 1118.066501 |          |             |             |             |             |
| PCF11       | PCF11    | 2003.147157 | 2243.096616 | 3695.309292 |             |
| 2827.531336 |          |             |             |             |             |
| TERF1       | TERF1    | 1729.185793 | 1625.100609 | 1292.354698 |             |
| 1117.085741 |          |             |             |             |             |
| CD81        | CD81     | 6314.65318  | 3826.821424 | 5377.935037 |             |
| 1750.656758 |          |             |             |             |             |
| AMOTL2      | AMOTL2   | 6.250069132 | 0           | 10.03554123 | 10.78836098 |
| WDR59       | WDR59    | 1103.137202 | 1955.226681 | 1300.160119 |             |
| 1647.676949 |          |             |             |             |             |
| RBM7        | RBM7     | 2741.696993 | 2507.197473 | 3728.761096 |             |
| 2675.513522 |          |             |             |             |             |
| TAF1D       | TAF1D    | 936.4686916 | 1047.600068 | 1314.655901 |             |
| 1122.970302 |          |             |             |             |             |
| DDX28       | DDX28    | 3365.662228 | 2334.65158  | 2867.93467  |             |
| 3002.106631 |          |             |             |             |             |
| FBXL8       | FBXL8    | 221.8774542 | 302.8356499 | 128.2319157 |             |
| 268.7282643 |          |             |             |             |             |
| UBL5        | UBL5     | 7586.542248 | 9891.457447 | 6273.328327 |             |
| 6484.785706 |          |             |             |             |             |
| AP00        | AP00     | 1051.053292 | 1064.326455 | 864.1716056 |             |
| 998.4137703 |          |             |             |             |             |
| C1orf146    | C1orf146 |             | 3.125034566 | 0.880336191 |             |
| 3.345180409 |          | 4.903800443 |             |             |             |
| C4orf36     | C4orf36  | 4.166712755 | 4.401680957 | 20.07108245 |             |

|             |             |             |             |             |             |
|-------------|-------------|-------------|-------------|-------------|-------------|
| 15.69216142 |             |             |             |             |             |
| SEC16A      | SEC16A      | 2822.947891 | 7364.012241 | 4305.247186 |             |
| 3629.793088 |             |             |             |             |             |
| GPRC5D      | GPRC5D      | 9.375103698 | 26.41008574 | 0           | 10.78836098 |
| ARNT2       | ARNT2       | 0           | 0           | 10.78836098 |             |
| IRF4        | IRF4        | 15835.59182 | 22820.95509 | 16327.82558 |             |
| 21847.41174 |             |             |             |             |             |
| RNF187      | RNF187      | 5064.639353 | 6247.745951 | 6548.74818  |             |
| 6999.684753 |             |             |             |             |             |
| PLA2G1B     | PLA2G1B     | 0           | 0.880336191 | 0           | 1.961520177 |
| KBTBD6      | KBTBD6      | 606.2567058 | 483.3045691 | 921.0396726 |             |
| 618.8596159 |             |             |             |             |             |
| MST1R       | MST1R       | 55.208944   | 65.14487817 | 76.9391494  |             |
| 55.90332505 |             |             |             |             |             |
| CATSPER3    | CATSPER3    |             | 46.87551849 | 29.05109432 |             |
| 23.41626286 | 47.07648426 |             |             |             |             |
| KIAA1614    | KIAA1614    |             | 12.50013826 | 9.683698106 |             |
| 6.690360818 | 6.865320621 |             |             |             |             |
| GAL3ST3     | GAL3ST3     | 0           | 0           | 3.923040355 |             |
| PHF13       | PHF13       | 921.885197  | 1625.980946 | 1084.953513 |             |
| 1341.679801 |             |             |             |             |             |
| YPEL2       | YPEL2       | 752.0916522 | 551.970792  | 962.2968976 |             |
| 607.0904949 |             |             |             |             |             |
| PDGFA       | PDGFA       | 3.125034566 | 11.44437049 | 24.531323   |             |
| 29.42280266 |             |             |             |             |             |
| HSPG2       | HSPG2       | 5.208390943 | 16.72638764 | 26.76144327 |             |
| 23.53824213 |             |             |             |             |             |
| MGARP       | MGARP       | 1.041678189 | 3.521344766 | 10.03554123 |             |
| 11.76912106 |             |             |             |             |             |
| WASH3P      | WASH3P      | 103.1261407 | 205.1183326 | 182.8698623 |             |
| 167.7099752 |             |             |             |             |             |
| YBX1        | YBX1        | 3309.411605 | 9130.846978 | 3744.371938 |             |
| 3664.119691 |             |             |             |             |             |
| RAB40B      | RAB40B      | 103.1261407 | 96.83698106 | 169.4891407 |             |
| 203.9980984 |             |             |             |             |             |
| MOB1B       | MOB1B       | 319.7952039 | 633.8420578 | 492.8565802 |             |
| 424.6691184 |             |             |             |             |             |
| CIA01       | CIA01       | 8304.25852  | 6225.737546 | 8390.827525 |             |
| 8077.54009  |             |             |             |             |             |
| RAB33A      | RAB33A      | 1945.854856 | 1687.604479 | 942.2258151 |             |
| 1324.02612  |             |             |             |             |             |
| PALD1       | PALD1       | 65.62572589 | 126.7684116 | 41.25722504 |             |
| 165.748455  |             |             |             |             |             |
| COQ4        | COQ4        | 1820.853474 | 1424.383958 | 1466.304079 |             |
| 1665.330631 |             |             |             |             |             |
| NDC80       | NDC80       | 8027.172122 | 8079.725565 | 3942.852642 |             |
| 5649.178111 |             |             |             |             |             |
| C22orf15    | C22orf15    |             | 40.62544936 | 131.1700925 |             |
| 62.44336763 | 57.86484523 |             |             |             |             |
| TRAF3IP3    | TRAF3IP3    |             | 24632.56413 | 17144.54733 |             |

|                 |              |               |             |  |   |
|-----------------|--------------|---------------|-------------|--|---|
| 12430.6904      | 11975.08068  |               |             |  |   |
| LGI4 LGI4       | 1.041678189  | 4.401680957   | 8.92048109  |  | 0 |
| OLIG3 OLIG3     | 36.4587366   | 11.44437049   | 62.44336763 |  |   |
| 34.3266031      |              |               |             |  |   |
| SLC9C1 SLC9C1   | 1.041678189  | 7.042689532   | 2.230120273 |  |   |
| 1.961520177     |              |               |             |  |   |
| RPL8 RPL8       | 30636.79721  | 31067.94453   | 30650.77303 |  |   |
| 33326.22781     |              |               |             |  |   |
| OR1F2P OR1F2P   | 3.125034566  | 1.760672383   | 5.575300681 |  | 0 |
| NUPL2 NUPL2     | 2150.023781  | 1864.552053   | 1805.282361 |  |   |
| 1785.964121     |              |               |             |  |   |
| MYCBP2 MYCBP2   | 1851.062141  | 3435.071819   | 3942.852642 |  |   |
| 3061.932997     |              |               |             |  |   |
| TEX2 TEX2       | 1723.977402  | 1386.529502   | 1922.363675 |  |   |
| 1578.042983     |              |               |             |  |   |
| CCDC37 CCDC37   | 2.083356377  | 3.521344766   | 10.03554123 |  |   |
| 0.980760089     |              |               |             |  |   |
| C16orf71        | C16orf71     | 15.62517283   | 13.20504287 |  |   |
| 28.99156354     | 12.74988115  |               |             |  |   |
| CTU2 CTU2       | 2038.564215  | 1221.906634   | 1537.667928 |  |   |
| 1501.543696     |              |               |             |  |   |
| TPST2 TPST2     | 4643.801365  | 5532.032627   | 2063.976312 |  |   |
| 3142.355324     |              |               |             |  |   |
| MXRA7 MXRA7     | 463.546794   | 676.9785312   | 519.6180235 |  |   |
| 602.1866944     |              |               |             |  |   |
| RASGRP1 RASGRP1 | 12188.67649  | 11321.12342   | 8865.843143 |  |   |
| 8299.19187      |              |               |             |  |   |
| BEND5 BEND5     | 291.6698928  | 190.1526174   | 128.2319157 |  |   |
| 383.4771947     |              |               |             |  |   |
| CAMLG CAMLG     | 1480.224706  | 1198.137557   | 1787.441398 |  |   |
| 1187.700467     |              |               |             |  |   |
| CSTB CSTB       | 6084.4423    | 6401.804784   | 4951.982065 |  |   |
| 4382.036076     |              |               |             |  |   |
| S1PR3 S1PR3     | 53.12558762  | 19.36739621   | 34.56686422 |  |   |
| 146.1332532     |              |               |             |  |   |
| FEM1C FEM1C     | 1118.762375  | 1356.598071   | 1643.598641 |  |   |
| 1413.275288     |              |               |             |  |   |
| LXN LXN         | 1020.844625  | 1066.087128   | 428.1830923 |  |   |
| 921.9144833     |              |               |             |  |   |
| CCL20 CCL20     | 180.2103266  | 248.254806    | 247.5433503 |  |   |
| 1260.276714     |              |               |             |  |   |
| COL5A3 COL5A3   | 2.083356377  | 60.74319721   | 5.575300681 |  |   |
| 49.03800443     |              |               |             |  |   |
| CASC6 CASC6     | 0 0          | 0 0.980760089 |             |  |   |
| LOC100506159    | LOC100506159 | 0 2.641008574 | 0           |  | 0 |
| LOC100506258    | LOC100506258 | 0 14.96571525 | 0           |  |   |
| 15.69216142     |              |               |             |  |   |
| DGKQ DGKQ       | 1286.472563  | 1763.313391   | 1363.718547 |  |   |
| 1926.212814     |              |               |             |  |   |
| LNP1 LNP1       | 144.7932682  | 206.879005    | 207.4011853 |  |   |

|                 |             |             |             |             |   |
|-----------------|-------------|-------------|-------------|-------------|---|
| 184.3828967     |             |             |             |             |   |
| CHADL CHADL     | 531.2558762 | 284.3485898 | 321.1373192 |             |   |
| 350.1313517     |             |             |             |             |   |
| SPEF1 SPEF1     | 3.125034566 | 0           | 2.230120273 | 9.807600887 |   |
| SPIN1 SPIN1     | 2405.234938 | 3345.277527 | 3030.73345  |             |   |
| 2484.265305     |             |             |             |             |   |
| SUB1 SUB1       | 21888.78378 | 25775.36335 | 16529.65146 |             |   |
| 16136.44574     |             |             |             |             |   |
| ZBTB5 ZBTB5     | 229.1692015 | 374.1428814 | 292.1457557 |             |   |
| 271.6705446     |             |             |             |             |   |
| KCNK1 KCNK1     | 336.4620549 | 292.2716156 | 63.55842777 |             |   |
| 44.13420399     |             |             |             |             |   |
| SLC02A1 SLC02A1 | 0 0         | 0           | 0.980760089 |             |   |
| FKBP10 FKBP10   | 0 0         | 0           | 0.980760089 |             |   |
| FBXW4 FBXW4     | 197.9188559 | 299.3143051 | 422.6077916 |             |   |
| 372.6888337     |             |             |             |             |   |
| ATG16L2 ATG16L2 | 940.6354044 | 1125.949989 | 845.2155833 |             |   |
| 1154.354624     |             |             |             |             |   |
| MICALL1 MICALL1 | 305.2117093 | 921.7119924 | 478.3607985 |             |   |
| 452.1304009     |             |             |             |             |   |
| WNK3 WNK3       | 3.125034566 | 4.401680957 | 24.531323   |             |   |
| 29.42280266     |             |             |             |             |   |
| ARL13A ARL13A   | 1.041678189 | 1.760672383 | 6.690360818 |             |   |
| 5.884560532     |             |             |             |             |   |
| MTRNR2L1        | MTRNR2L1    | 20.83356377 | 0           | 97.01023186 |   |
| 0               |             |             |             |             |   |
| CNTRL CNTRL     | 5532.35286  | 5767.962726 | 4472.506207 |             |   |
| 4787.089993     |             |             |             |             |   |
| SRP14 SRP14     | 22908.58673 | 21823.53419 | 20449.08784 |             |   |
| 19377.85783     |             |             |             |             |   |
| ACSM1 ACSM1     | 0 0         | 6.690360818 | 11.76912106 |             |   |
| NPM3 NPM3       | 207.2939596 | 293.1519517 | 131.5770961 |             |   |
| 159.8638945     |             |             |             |             |   |
| FLJ33360        | FLJ33360    | 4.166712755 | 0           | 0           | 0 |
| PARD6G-AS1      | PARD6G-AS1  | 4.166712755 | 0.880336191 |             |   |
| 3.345180409     | 2.942280266 |             |             |             |   |
| LEFTY1 LEFTY1   | 2.083356377 | 0.880336191 | 7.805420954 |             |   |
| 2.942280266     |             |             |             |             |   |
| FGF6 FGF6       | 0 0         | 2.230120273 | 0.980760089 |             |   |
| HEBP1 HEBP1     | 320.8368821 | 435.7664148 | 555.2999479 |             |   |
| 626.7056967     |             |             |             |             |   |
| USP12-AS1       | USP12-AS1   | 0           | 0.880336191 | 0           | 0 |
| SNTB2 SNTB2     | 1355.223324 | 1619.818592 | 1116.175196 |             |   |
| 1468.197853     |             |             |             |             |   |
| PTTG1 PTTG1     | 8486.552203 | 9226.803622 | 3891.559876 |             |   |
| 4895.954363     |             |             |             |             |   |
| MIA MIA         | 1.041678189 | 0           | 13.38072164 | 2.942280266 |   |
| C11orf65        | C11orf65    | 38.54209298 | 12.32470668 |             |   |
| 37.91204463     | 37.26888337 |             |             |             |   |
| NIFK NIFK       | 5299.016946 | 3651.634522 | 5616.557906 |             |   |

|                   |               |             |               |  |  |
|-------------------|---------------|-------------|---------------|--|--|
| 5189.201629       |               |             |               |  |  |
| FAXDC2 FAXDC2     | 11.45846008   | 28.17075813 | 26.76144327   |  |  |
| 18.63444168       |               |             |               |  |  |
| NLGN2 NLGN2       | 1.041678189   | 7.042689532 | 10.03554123   |  |  |
| 5.884560532       |               |             |               |  |  |
| LRRC7 LRRC7       | 0 0           | 11.15060136 | 0             |  |  |
| DCAF15 DCAF15     | 465.6301503   | 1103.061248 | 355.7041835   |  |  |
| 399.1693561       |               |             |               |  |  |
| SAMD1 SAMD1       | 131.2514518   | 248.254806  | 139.382517    |  |  |
| 171.6330155       |               |             |               |  |  |
| THAP3 THAP3       | 3133.367992   | 2146.259635 | 2235.695573   |  |  |
| 2469.553903       |               |             |               |  |  |
| REEP4 REEP4       | 3326.078457   | 3680.685616 | 2212.27931    |  |  |
| 2839.300457       |               |             |               |  |  |
| PNPLA3 PNPLA3     | 2.083356377   | 7.923025723 | 5.575300681   |  |  |
| 4.903800443       |               |             |               |  |  |
| C16orf70 C16orf70 |               | 2247.941531 | 1824.936925   |  |  |
| 1679.280565       | 1836.963646   |             |               |  |  |
| SH3BP5L SH3BP5L   | 553.1311182   | 1070.488809 | 764.9312535   |  |  |
| 693.3973827       |               |             |               |  |  |
| PSKH1 PSKH1       | 2072.939596   | 2427.967216 | 1780.751038   |  |  |
| 2201.806399       |               |             |               |  |  |
| POMZP3 POMZP3     | 142.7099119   | 310.7586756 | 244.1981698   |  |  |
| 286.3819459       |               |             |               |  |  |
| BTNL3 BTNL3       | 13.54181645   | 4.401680957 | 0 2.942280266 |  |  |
| SDK1 SDK1         | 0 2.641008574 | 13.38072164 | 45.11496408   |  |  |
| POLR2J2 POLR2J2   | 734.383123    | 732.4397113 | 782.7722157   |  |  |
| 722.8201853       |               |             |               |  |  |
| ANKRD23 ANKRD23   | 192.7104649   | 267.6222022 | 113.7361339   |  |  |
| 141.2294528       |               |             |               |  |  |
| HNRNPAB HNRNPAB   | 13652.23434   | 16707.02024 | 12940.27288   |  |  |
| 14440.71155       |               |             |               |  |  |
| IFT27 IFT27       | 610.4234186   | 698.1065998 | 375.7752659   |  |  |
| 429.5729188       |               |             |               |  |  |
| VIM VIM           | 31690.97553   | 34022.35279 | 16568.67856   |  |  |
| 14937.95691       |               |             |               |  |  |
| PLN PLN           | 6.250069132   | 2.641008574 | 15.61084191   |  |  |
| 18.63444168       |               |             |               |  |  |
| ZBED8 ZBED8       | 84.37593328   | 91.55496391 | 55.75300681   |  |  |
| 112.7874102       |               |             |               |  |  |
| MRPS7 MRPS7       | 10841.78659   | 8252.271459 | 8415.358848   |  |  |
| 8809.187116       |               |             |               |  |  |
| MRPS17 MRPS17     | 1494.808201   | 1220.145961 | 1314.655901   |  |  |
| 1425.044409       |               |             |               |  |  |
| BRAP BRAP         | 4071.92004    | 3277.491641 | 4130.182745   |  |  |
| 3423.83347        |               |             |               |  |  |
| PRR13 PRR13       | 15633.50626   | 11248.93585 | 12732.8717    |  |  |
| 10973.72463       |               |             |               |  |  |
| MEX3C MEX3C       | 1663.560067   | 1730.740952 | 1933.514276   |  |  |
| 1931.116615       |               |             |               |  |  |



|                 |                 |             |             |             |
|-----------------|-----------------|-------------|-------------|-------------|
| TNNC1           | TNNC1           | 7.291747321 | 8.803361914 | 6.690360818 |
| 9.807600887     |                 |             |             |             |
| IGDCC3          | IGDCC3          | 0           | 0.880336191 | 0           |
| CETP            | CETP            | 10.41678189 | 14.08537906 | 64.6734879  |
| 31.38432284     |                 |             |             |             |
| ERCC6L2         | ERCC6L2         | 1839.603681 | 1500.973206 | 2817.756964 |
| 1909.539893     |                 |             |             |             |
| NOM03           | NOM03           | 555.2144746 | 570.4578521 | 400.3065889 |
| 508.0337259     |                 |             |             |             |
| MIR6859-1       | MIR6859-1       |             | 9.375103698 | 7.042689532 |
| 6.690360818     | 8.826840798     |             |             |             |
| MIR6864         | MIR6864         | 1.041678189 | 3.521344766 | 0           |
| KIDINS220       | KIDINS220       |             | 3272.952869 | 2.942280266 |
| 4432.364042     | 3992.674321     |             |             | 4506.440964 |
| HEG1            | HEG1            | 395.8377117 | 1509.776568 | 968.9872584 |
| 1505.466736     |                 |             |             |             |
| C6orf58         | C6orf58         | 0           | 0           | 3.345180409 |
| PHOSPH02-KLHL23 | PHOSPH02-KLHL23 |             | 261.4612254 | 5.884560532 |
| 432.6433329     | 603.1674545     |             |             | 835.4390457 |
| HK3             | HK3             | 147.9183028 | 204.2379964 | 7.805420954 |
| 56.88408514     |                 |             |             |             |
| PWP1            | PWP1            | 6672.990477 | 4513.483654 | 5563.03502  |
| 5312.7774       |                 |             |             |             |
| CFH             | CFH             | 131.2514518 | 184.8706002 | 359.0493639 |
| 227.5363406     |                 |             |             |             |
| PROSC           | PROSC           | 8387.592775 | 6096.328126 | 7955.954072 |
| 6487.727987     |                 |             |             |             |
| PRPF3           | PRPF3           | 4787.552955 | 3677.164272 | 6191.928937 |
| 4561.515172     |                 |             |             |             |
| STX11           | STX11           | 4820.886657 | 4359.42482  | 3240.364756 |
| 3728.849857     |                 |             |             |             |
| TBC1D12         | TBC1D12         | 21.87524196 | 15.84605145 | 23.41626286 |
| 33.34584301     |                 |             |             |             |
| CRACR2A         | CRACR2A         | 964.5940027 | 1101.300575 | 693.5674048 |
| 960.1641268     |                 |             |             |             |
| GVINP1          | GVINP1          | 978.1358192 | 1732.501625 | 3400.933416 |
| 1846.771247     |                 |             |             |             |
| SNORD78         | SNORD78         | 47.91719668 | 14.96571525 | 50.17770613 |
| 39.23040355     |                 |             |             |             |
| SNORD77         | SNORD77         | 30.20866747 | 10.5640343  | 53.52288654 |
| 25.49976231     |                 |             |             |             |
| SNORD76         | SNORD76         | 65.62572589 | 42.25613719 | 100.3554123 |
| 77.480047       |                 |             |             |             |
| SNORD75         | SNORD75         | 6.250069132 | 9.683698106 | 28.99156354 |
| 9.807600887     |                 |             |             |             |
| SNORD80         | SNORD80         | 197.9188559 | 128.529084  | 225.2421475 |
| 265.785984      |                 |             |             |             |
| SNORD79         | SNORD79         | 90.62600242 | 41.375801   | 128.2319157 |
| 97.09524878     |                 |             |             |             |
| NBEAL2          | NBEAL2          | 1371.890175 | 4974.779818 | 829.6047414 |

|              |              |             |             |             |
|--------------|--------------|-------------|-------------|-------------|
| 1166.123745  |              |             |             |             |
| LOC101929567 | LOC101929567 | 0           | 0.880336191 | 0           |
| 1.961520177  |              |             |             |             |
| LINC01237    | LINC01237    | 3.125034566 |             | 1.760672383 |
| 2.230120273  | 5.884560532  |             |             |             |
| STAT4        | STAT4        | 10055.31956 | 4301.322631 | 10173.80868 |
| 7034.011356  |              |             |             |             |
| NCKAP1L      | NCKAP1L      | 6282.361156 | 14904.97206 | 5651.124771 |
| 9373.124167  |              |             |             |             |
| RARS         | RARS         | 8894.890053 | 6770.665648 | 7531.11616  |
| 8514.95909   |              |             |             |             |
| SPEN         | SPEN         | 4889.637418 | 4576.867859 | 6652.448773 |
| 4995.991892  |              |             |             |             |
| USP31        | USP31        | 375.0041479 | 394.3906138 | 429.2981525 |
| 370.7273135  |              |             |             |             |
| SPATA19      | SPATA19      | 0           | 0           | 1.961520177 |
| DUSP7        | DUSP7        | 372.9207916 | 579.261214  | 235.2776888 |
| 290.3049862  |              |             |             |             |
| SGCB         | SGCB         | 2638.570852 | 2317.925192 | 1204.264947 |
| 1556.466261  |              |             |             |             |
| MN1          | MN1          | 0           | 0           | 7.805420954 |
| MMP13        | MMP13        | 1.041678189 | 0           | 0           |
| DSTN         | DSTN         | 5312.558762 | 6410.608146 | 4607.428483 |
| 4377.132276  |              |             |             |             |
| PCCA         | PCCA         | 470.8385413 | 669.9358417 | 362.3945443 |
| 604.1482146  |              |             |             |             |
| KLHL26       | KLHL26       | 498.9638524 | 619.7566788 | 647.8499392 |
| 535.4950084  |              |             |             |             |
| NAP1L5       | NAP1L5       | 335.4203768 | 289.630607  | 340.0933416 |
| 318.7470288  |              |             |             |             |
| PRR7-AS1     | PRR7-AS1     |             | 5.208390943 | 18.48706002 |
| 22.30120273  | 24.51900222  |             |             |             |
| ARIH2        | ARIH2        | 11687.62928 | 8217.938347 | 9258.344311 |
| 9391.758609  |              |             |             |             |
| ZNF516       | ZNF516       | 39.58377117 | 87.15328295 | 379.1204463 |
| 185.3636568  |              |             |             |             |
| PDCD6IP      | PDCD6IP      | 9592.81444  | 8189.767589 | 8640.600996 |
| 9243.663836  |              |             |             |             |
| EFCC1        | EFCC1        | 2.083356377 | 13.20504287 | 13.38072164 |
| 9.807600887  |              |             |             |             |
| CNTNAP2      | CNTNAP2      | 0           | 0           | 1.115060136 |
| ARF3         | ARF3         | 2455.235491 | 4959.814103 | 0.980760089 |
| 1905.616852  |              |             |             | 1683.740806 |
| CDC14A       | CDC14A       | 2110.44001  | 1290.572857 | 3096.521998 |
| 1812.444644  |              |             |             |             |
| CLDN5        | CLDN5        | 22.91692015 | 7.042689532 | 23.41626286 |
| 9.807600887  |              |             |             |             |
| EDEM3        | EDEM3        | 2634.404139 | 3165.688944 | 2668.338906 |
| 2311.651529  |              |             |             |             |
| EPB41L4B     | EPB41L4B     |             | 26.04195472 | 25.52974955 |

|                  |                  |             |             |             |  |
|------------------|------------------|-------------|-------------|-------------|--|
| 11.15060136      | 12.74988115      |             |             |             |  |
| ADCK5 ADCK5      | 563.5479001      | 580.1415502 | 410.3421301 |             |  |
| 687.5128222      |                  |             |             |             |  |
| TAB2 TAB2        | 4191.713031      | 4868.259139 | 3332.914747 |             |  |
| 2631.379318      |                  |             |             |             |  |
| KLB KLB          | 18.7502074       | 23.76907717 | 14.49578177 |             |  |
| 9.807600887      |                  |             |             |             |  |
| MIR762 MIR762    | 290.6282146      | 236.8104355 | 217.4367266 |             |  |
| 261.8629437      |                  |             |             |             |  |
| MIR1296 MIR1296  | 1.041678189      | 1.760672383 | 4.460240545 |             |  |
| 9.807600887      |                  |             |             |             |  |
| MIR320C1         | MIR320C1         | 1.041678189 | 3.521344766 |             |  |
| 5.575300681      | 0                |             |             |             |  |
| MIR4638 MIR4638  | 0                | 1.760672383 | 0           | 0.980760089 |  |
| MIR206 MIR206    | 0                | 0           | 0           | 0.980760089 |  |
| C3orf49 C3orf49  | 4.166712755      | 4.401680957 | 4.460240545 |             |  |
| 4.903800443      |                  |             |             |             |  |
| MIR186 MIR186    | 2.083356377      | 0           | 2.230120273 | 2.942280266 |  |
| LINC00467        | LINC00467        | 171.8769011 | 154.0588335 |             |  |
| 120.4264947      | 169.6714953      |             |             |             |  |
| XPA XPA          | 781.2586415      | 689.3032379 | 819.5692002 |             |  |
| 884.6456         |                  |             |             |             |  |
| C10TNF9B-AS1     | C10TNF9B-AS1     | 53.12558762 | 45.77748195 |             |  |
| 28.99156354      | 34.3266031       |             |             |             |  |
| KLHL23 KLHL23    | 198.960534       | 779.0975294 | 344.5535821 |             |  |
| 509.9952461      |                  |             |             |             |  |
| B3GALT2 B3GALT2  | 62.50069132      | 76.58924866 | 91.43493117 |             |  |
| 122.5950111      |                  |             |             |             |  |
| LSM14A LSM14A    | 10203.23786      | 10658.23027 | 11427.13628 |             |  |
| 9714.428678      |                  |             |             |             |  |
| FTO FTO          | 3191.70197       | 3087.339023 | 2479.893743 |             |  |
| 4097.61565       |                  |             |             |             |  |
| TBC1D3P1-DHX40P1 | TBC1D3P1-DHX40P1 | 0           | 1.760672383 |             |  |
| 1.115060136      | 0.980760089      |             |             |             |  |
| GRAMD2 GRAMD2    | 0                | 1.760672383 | 7.805420954 | 0           |  |
| TM4SF1 TM4SF1    | 2.083356377      | 0           | 26.76144327 | 0           |  |
| ST8SIA2 ST8SIA2  | 1.041678189      | 0           | 0           | 1.961520177 |  |
| EIF3A EIF3A      | 22473.16524      | 17760.78266 | 17312.42368 |             |  |
| 16455.19277      |                  |             |             |             |  |
| RIPK1 RIPK1      | 2855.239915      | 2655.97429  | 3737.681577 |             |  |
| 3035.452474      |                  |             |             |             |  |
| RAB11FIP5        | RAB11FIP5        | 365.6290442 | 718.3543322 |             |  |
| 886.4728083      | 868.9534386      |             |             |             |  |
| CAMSAP1 CAMSAP1  | 381.2542171      | 858.3277867 | 690.2222243 |             |  |
| 735.5700665      |                  |             |             |             |  |
| MBTPS1 MBTPS1    | 6351.111916      | 5966.918706 | 6191.928937 |             |  |
| 6435.747702      |                  |             |             |             |  |
| RHOB RHOB        | 84.37593328      | 164.6228678 | 74.70902913 |             |  |
| 59.82636541      |                  |             |             |             |  |
| CALM1 CALM1      | 52026.61713      | 43690.20484 | 31138.05431 |             |  |

|              |              |             |             |             |             |             |
|--------------|--------------|-------------|-------------|-------------|-------------|-------------|
| 33321.32401  |              |             |             |             |             |             |
| TAT          | TAT          | 0           | 0           | 7.805420954 | 0           |             |
| ABCC8        | ABCC8        | 0           | 0           | 0           | 3.923040355 |             |
| FABP2        | FABP2        | 0           | 6.16235334  | 0           | 0           |             |
| CRIPT        | CRIPT        | 1377.098565 |             | 1626.861282 | 1669.245024 |             |
| 1200.450349  |              |             |             |             |             |             |
| ITPRIPL2     | ITPRIPL2     |             |             | 548.9644054 | 655.8504626 |             |
| 420.3776714  | 480.5724434  |             |             |             |             |             |
| LOC102723385 | LOC102723385 |             |             | 70.83411683 | 68.66622293 |             |
| 64.6734879   | 54.92256497  |             |             |             |             |             |
| PCDHB19P     | PCDHB19P     |             |             | 0           | 0           | 2.230120273 |
| MIR1277      | MIR1277      | 0           | 0           | 1.115060136 | 0.980760089 | 0           |
| MIR548H4     | MIR548H4     |             |             | 0           | 0.880336191 | 3.345180409 |
|              | 0.980760089  |             |             |             |             |             |
| MIR548G      | MIR548G      | 0           | 0.880336191 | 0           | 0           |             |
| THUMPD2      | THUMPD2      | 881.2597476 |             | 637.3634026 | 647.8499392 |             |
| 632.5902572  |              |             |             |             |             |             |
| EPB41L4A-AS2 | EPB41L4A-AS2 |             |             | 0           | 0           | 2.230120273 |
| REEP2        | REEP2        | 83.3342551  |             | 152.2981611 | 45.71746559 |             |
| 112.7874102  |              |             |             |             |             |             |
| FLJ33581     | FLJ33581     |             |             | 0           | 0.880336191 | 0           |
| MIR5196      | MIR5196      | 0           | 0.880336191 | 0           | 0           |             |
| LOC100128714 | LOC100128714 |             |             | 0           | 0           | 0.980760089 |
| FAM212B-AS1  | FAM212B-AS1  |             |             | 1.041678189 | 7.042689532 | 0           |
|              | 2.942280266  |             |             |             |             |             |
| LARGE-AS1    | LARGE-AS1    |             |             | 0           | 0           | 2.230120273 |
| 3.923040355  |              |             |             |             |             |             |
| RRS1-AS1     | RRS1-AS1     |             |             | 2.083356377 | 3.521344766 |             |
| 2.230120273  | 4.903800443  |             |             |             |             |             |
| ISPD-AS1     | ISPD-AS1     |             |             | 7.291747321 | 3.521344766 |             |
| 5.575300681  | 2.942280266  |             |             |             |             |             |
| HTR5A0S      | HTR5A0S      | 0           | 1.760672383 | 0           | 0           |             |
| FLJ33534     | FLJ33534     |             |             | 0           | 8.803361914 | 0           |
| 5.884560532  |              |             |             |             |             |             |
| ADD3-AS1     | ADD3-AS1     |             |             | 309.378422  | 322.2030461 |             |
| 259.8090118  | 259.9014235  |             |             |             |             |             |
| LOC100128531 | LOC100128531 |             |             | 3.125034566 | 0.880336191 | 0           |
|              | 4.903800443  |             |             |             |             |             |
| SH3PXD2A-AS1 | SH3PXD2A-AS1 |             |             | 73.9591514  | 108.2813515 |             |
| 20.07108245  | 40.21116364  |             |             |             |             |             |
| LOC100507424 | LOC100507424 |             |             | 1333.348082 | 1769.475745 |             |
| 848.5607637  | 932.7028443  |             |             |             |             |             |
| WWTR1-AS1    | WWTR1-AS1    |             |             | 2.083356377 | 0           | 0           |
| 0.980760089  |              |             |             |             |             |             |
| LOC100131289 | LOC100131289 |             |             | 51.04223125 | 91.55496391 |             |
| 41.25722504  | 61.78788559  |             |             |             |             |             |
| LOC728175    | LOC728175    |             |             | 8.33342551  | 4.401680957 | 0           |
|              | 1.961520177  |             |             |             |             |             |
| LOC399715    | LOC399715    |             |             | 7.291747321 | 11.44437049 |             |
| 50.17770613  | 36.28812328  |             |             |             |             |             |

|              |              |             |             |
|--------------|--------------|-------------|-------------|
| LOC100130992 | LOC100130992 | 40.62544936 | 88.91395534 |
| 121.5415549  | 191.2482173  |             |             |
| LOC100506123 | LOC100506123 | 29.16698928 | 13.20504287 |
| 39.02710477  | 8.826840798  |             |             |
| LOC152578    | LOC152578    | 0           | 0.880336191 |
| 0            |              |             | 5.575300681 |
| LINC00862    | LINC00862    | 1.041678189 | 1.760672383 |
| 3.345180409  | 2.942280266  |             |             |
| OR4D10       | OR4D10       | 0           | 0           |
|              |              | 1.115060136 |             |
| NACC2        | NACC2        | 89.58432423 | 207.7593412 |
| 312.8624683  |              |             | 284.3403347 |
| AKAP11       | AKAP11       | 3159.409946 | 1311.700925 |
| 1296.564837  |              |             | 2266.917257 |
| IMPG2        | IMPG2        | 0           | 5.282017149 |
|              |              | 11.15060136 | 11.76912106 |
| ZNF208       | ZNF208       | 9.375103698 | 16.72638764 |
| 38.24964346  |              |             | 94.78011158 |
| ZNF184       | ZNF184       | 1435.432544 | 1325.786304 |
| 1645.715429  |              |             | 1742.838993 |
| AARS         | AARS         | 15682.46513 | 15315.20872 |
| 17245.6854   |              |             | 24486.72059 |
| DMGDH        | DMGDH        | 1.041678189 | 3.521344766 |
|              |              |             | 0           |
| ZSCAN5A      | ZSCAN5A      | 360.4206533 | 251.7761508 |
| 333.4584301  |              |             | 320.0222591 |
| OXT          | OXT          | 12.50013826 | 16.72638764 |
| 31.38432284  |              |             | 33.45180409 |
| OPRK1        | OPRK1        | 0           | 0           |
|              |              | 22.30120273 |             |
| RPS15        | RPS15        | 15238.71022 | 15967.53784 |
| 15530.336    |              |             | 15649.86901 |
| OXTR         | OXTR         | 35.41705842 | 32.57243908 |
| 42.17268381  |              |             | 1.115060136 |
| PIK3R3       | PIK3R3       | 402.0877808 | 597.748274  |
| 235.3824213  |              |             | 177.2945617 |
| THOC6        | THOC6        | 4436.507406 | 3862.034872 |
| 3588.601164  |              |             | 2879.085272 |
| SNORA51      | SNORA51      | 93.75103698 | 76.58924866 |
| 90.22992816  |              |             | 74.70902913 |
| RIPK3        | RIPK3        | 1028.136372 | 1027.352335 |
| 1084.720658  |              |             | 912.1191915 |
| UFL1         | UFL1         | 2762.530556 | 3034.518852 |
| 2707.878605  |              |             | 2738.587695 |
| CREB1        | CREB1        | 4897.970843 | 4666.662151 |
| 4584.072654  |              |             | 4634.189926 |
| OSCP1        | OSCP1        | 73.9591514  | 52.82017149 |
| 96.11448869  |              |             | 60.21324736 |
| FGD5P1       | FGD5P1       | 0           | 0           |
|              |              | 4.460240545 |             |
| BCAS3        | BCAS3        | 746.8832613 | 826.6356838 |
| 1146.508544  |              |             | 758.2408927 |
| LOC285740    | LOC285740    | 80.20922053 | 68.66622293 |
| 70.24878858  | 79.44156718  |             |             |
| CNTF         | CNTF         | 36.4587366  | 32.57243908 |
|              |              |             | 85.85963049 |

|                 |              |             |             |               |   |
|-----------------|--------------|-------------|-------------|---------------|---|
| 23.53824213     |              |             |             |               |   |
| NUPR1L NUPR1L   | 2.083356377  | 0           | 12.2656615  | 3.923040355   |   |
| SUPT20HL1       | SUPT20HL1    | 0           | 0           | 6.690360818   | 0 |
| HS3ST3B1        | HS3ST3B1     | 994.8026702 |             | 1719.296582   |   |
| 274.3047935     | 425.6498785  |             |             |               |   |
| EPHA3 EPHA3     | 0 0          | 0           | 0.980760089 |               |   |
| ASCL2 ASCL2     | 19.79188559  | 33.45277527 |             | 15.61084191   |   |
| 61.78788559     |              |             |             |               |   |
| GZMA GZMA       | 7783.419426  | 10144.11393 |             | 2738.587695   |   |
| 3358.122544     |              |             |             |               |   |
| KIAA0355        | KIAA0355     | 325.0035949 |             | 467.4585177   |   |
| 664.5758412     | 628.6672168  |             |             |               |   |
| SPATA6 SPATA6   | 11.45846008  | 17.60672383 |             | 44.60240545   |   |
| 38.24964346     |              |             |             |               |   |
| LPIN2 LPIN2     | 2186.482518  | 4116.452031 |             | 10273.04904   |   |
| 6747.62941      |              |             |             |               |   |
| MEDAG MEDAG     | 0 0          | 0           | 3.923040355 |               |   |
| SPC25 SPC25     | 2997.949827  | 2290.63477  |             | 1679.280565   |   |
| 2073.326827     |              |             |             |               |   |
| TMEM194B        | TMEM194B     | 1092.72042  |             | 2451.736293   |   |
| 1078.263152     | 1907.578372  |             |             |               |   |
| TMEM194A        | TMEM194A     | 4095.878638 |             | 5387.657492   |   |
| 5577.530802     | 6364.152215  |             |             |               |   |
| ABI3 ABI3       | 7663.626434  | 5346.281691 |             | 3388.667754   |   |
| 3921.078834     |              |             |             |               |   |
| CCDC102B        | CCDC102B     | 20.83356377 |             | 29.05109432   |   |
| 79.16926967     | 44.13420399  |             |             |               |   |
| MGLL MGLL       | 44.79216211  | 110.9223601 |             | 156.1084191   |   |
| 142.2102129     |              |             |             |               |   |
| EBF4 EBF4       | 3.125034566  | 3.521344766 |             | 0 11.76912106 |   |
| MTMR11 MTMR11   | 465.6301503  | 211.2806859 |             | 37.91204463   |   |
| 110.82589       |              |             |             |               |   |
| CBR3 CBR3       | 2394.818156  | 1867.193062 |             | 1417.241433   |   |
| 1393.660086     |              |             |             |               |   |
| ZDHC5 ZDHC5     | 10546.99166  | 8428.338697 |             | 8781.098573   |   |
| 8542.420372     |              |             |             |               |   |
| HEYL HEYL       | 4.166712755  | 1.760672383 |             | 49.062646     |   |
| 2.942280266     |              |             |             |               |   |
| CRACR2B CRACR2B | 44.79216211  | 44.89714576 |             | 1.115060136   |   |
| 10.78836098     |              |             |             |               |   |
| TMEM59L TMEM59L | 2.083356377  | 0 0         | 0           |               |   |
| STAP1 STAP1     | 1717.727333  | 1859.270036 |             | 719.2137879   |   |
| 850.3189969     |              |             |             |               |   |
| STK32B STK32B   | 0 0          | 0           | 1.961520177 |               |   |
| CFL1P1 CFL1P1   | 27.08363291  | 7.923025723 |             | 40.14216491   |   |
| 15.69216142     |              |             |             |               |   |
| LOC100132891    | LOC100132891 | 228.1275233 |             | 576.6202054   |   |
| 234.1626286     | 417.8037978  |             |             |               |   |
| CAPN11 CAPN11   | 22.91692015  | 0 0         | 0.980760089 |               |   |
| CWC15 CWC15     | 4480.25789   | 3317.987106 |             | 4052.128535   |   |

|                 |              |             |             |             |
|-----------------|--------------|-------------|-------------|-------------|
| 3378.718505     |              |             |             |             |
| NDUFA4L2        | NDUFA4L2     | 36.4587366  | 62.50386959 |             |
| 45.71746559     | 73.55700665  |             |             |             |
| SPDYE5 SPDYE5   | 9.375103698  | 23.76907717 | 37.91204463 |             |
| 34.3266031      |              |             |             |             |
| DCDC2B DCDC2B   | 55.208944    | 66.02521436 | 66.90360818 |             |
| 89.24916807     |              |             |             |             |
| RGPD6 RGPD6     | 6.250069132  | 7.923025723 | 12.2656615  |             |
| 7.846080709     |              |             |             |             |
| LINC00925       | LINC00925    | 12.50013826 | 8.803361914 |             |
| 115.9662542     | 69.6339663   |             |             |             |
| C10orf76        | C10orf76     | 2721.905107 | 2606.675463 |             |
| 2113.038958     | 2140.018513  |             |             |             |
| ZNF426 ZNF426   | 969.8023937  | 873.2935019 | 1398.285411 |             |
| 1167.104506     |              |             |             |             |
| KLHL12 KLHL12   | 5859.439811  | 4836.567036 | 4872.812795 |             |
| 5845.330128     |              |             |             |             |
| ZNF350 ZNF350   | 822.9257691  | 699.8672722 | 1520.942026 |             |
| 1160.239185     |              |             |             |             |
| LOC101928891    | LOC101928891 | 0           | 2.641008574 | 0           |
| 0.980760089     |              |             |             |             |
| ZMYND10 ZMYND10 | 64.5840477   | 58.98252483 | 15.61084191 |             |
| 34.3266031      |              |             |             |             |
| ATAD2B ATAD2B   | 1107.303915  | 1213.983608 | 1393.82517  |             |
| 1430.928969     |              |             |             |             |
| COQ3 COQ3       | 1934.396396  | 1625.100609 | 1207.610128 |             |
| 1498.601415     |              |             |             |             |
| PLEKHG2 PLEKHG2 | 409.3795282  | 1206.940918 | 330.0578003 |             |
| 564.9178111     |              |             |             |             |
| AG01 AG01       | 1285.430885  | 2744.007909 | 1217.645669 |             |
| 2020.365783     |              |             |             |             |
| GABARAPL1       | GABARAPL1    | 1005.219452 | 598.6286102 |             |
| 3015.122608     | 872.8764789  |             |             |             |
| C16orf52        | C16orf52     | 34.37538023 | 133.8111011 |             |
| 37.91204463     | 89.24916807  |             |             |             |
| GDE1 GDE1       | 5839.647926  | 4928.122    | 2900.271414 |             |
| 2399.919937     |              |             |             |             |
| AHSP AHSP       | 0            | 1.760672383 | 0           | 0.980760089 |
| CCDC39 CCDC39   | 4.166712755  | 6.16235334  | 11.15060136 |             |
| 5.884560532     |              |             |             |             |
| MLLT4 MLLT4     | 693.7576737  | 500.9112929 | 403.6517693 |             |
| 254.9976231     |              |             |             |             |
| FAM19A1 FAM19A1 | 4.166712755  | 2.641008574 | 12.2656615  |             |
| 9.807600887     |              |             |             |             |
| SFXN1 SFXN1     | 16994.97965  | 16375.1335  | 14686.45705 |             |
| 17494.79846     |              |             |             |             |
| F11R F11R       | 905.218346   | 914.6693029 | 2483.238923 |             |
| 1620.215666     |              |             |             |             |
| C11orf1 C11orf1 | 577.0897165  | 543.1674301 | 1041.466167 |             |
| 648.2824186     |              |             |             |             |

|                 |             |             |             |             |
|-----------------|-------------|-------------|-------------|-------------|
| C2orf195        | C2orf195    | 6.250069132 | 0.880336191 |             |
| 1.115060136     | 9.807600887 |             |             |             |
| PFKP PFKP       | 16677.2678  | 16339.92005 | 8691.893762 |             |
| 14626.0752      |             |             |             |             |
| COX17 COX17     | 4074.003396 | 4501.158947 | 4027.597212 |             |
| 3654.31209      |             |             |             |             |
| HOXA1 HOXA1     | 15.62517283 | 23.76907717 | 5.575300681 |             |
| 17.6536816      |             |             |             |             |
| HMGB1 HMGB1     | 43236.93658 | 50623.73269 | 30731.05736 |             |
| 38602.71709     |             |             |             |             |
| CCAR1 CCAR1     | 11583.46146 | 9534.921289 | 8526.864862 |             |
| 9652.640793     |             |             |             |             |
| SCARNA18        | SCARNA18    | 1.041678189 | 0           | 2.230120273 |
| 0.980760089     |             |             |             |             |
| GBP1P1 GBP1P1   | 37.50041479 | 19.36739621 | 805.0734184 |             |
| 302.0741073     |             |             |             |             |
| SCARNA1 SCARNA1 | 12.50013826 | 4.401680957 | 53.52288654 |             |
| 22.55748204     |             |             |             |             |
| SNORA36B        | SNORA36B    | 0           | 2.230120273 | 0           |
| SNORA81 SNORA81 | 75.00082959 | 66.90555055 | 153.8782988 |             |
| 112.7874102     |             |             |             |             |
| SNORD50A        | SNORD50A    | 27.08363291 | 14.96571525 |             |
| 50.17770613     | 20.59596186 |             |             |             |
| SNORA76A        | SNORA76A    | 5.208390943 | 8.803361914 |             |
| 13.38072164     | 4.903800443 |             |             |             |
| SNORA54 SNORA54 | 1.041678189 | 1.760672383 | 1.115060136 |             |
| 3.923040355     |             |             |             |             |
| SNORA55 SNORA55 | 0           | 0.880336191 | 1.115060136 | 0           |
| SNORA60 SNORA60 | 6.250069132 | 1.760672383 | 7.805420954 |             |
| 5.884560532     |             |             |             |             |
| SNORA74B        | SNORA74B    | 1.041678189 | 7.923025723 |             |
| 1.115060136     | 0           |             |             |             |
| SNORA61 SNORA61 | 52.08390943 | 73.94824008 | 63.55842777 |             |
| 72.57624656     |             |             |             |             |
| SNORD56 SNORD56 | 32.29202385 | 27.29042193 | 45.71746559 |             |
| 41.19192372     |             |             |             |             |
| SNORD57 SNORD57 | 64.5840477  | 51.93983529 | 78.05420954 |             |
| 89.24916807     |             |             |             |             |
| SNORA46 SNORA46 | 0           | 4.401680957 | 0           | 0           |
| SNORA45B        | SNORA45B    | 31.25034566 | 31.69210289 |             |
| 33.45180409     | 38.24964346 |             |             |             |
| SNORD61 SNORD61 | 5.208390943 | 10.5640343  | 20.07108245 |             |
| 12.74988115     |             |             |             |             |
| SNORA44 SNORA44 | 12.50013826 | 24.64941336 | 15.61084191 |             |
| 37.26888337     |             |             |             |             |
| PIF1 PIF1       | 1151.054399 | 1411.178915 | 216.3216664 |             |
| 742.4353871     |             |             |             |             |
| FAM188A FAM188A | 1443.76597  | 1035.275361 | 1123.980617 |             |
| 836.5883556     |             |             |             |             |
| MEIG1 MEIG1     | 40.62544936 | 24.64941336 | 60.21324736 |             |



|             |          |             |             |             |             |
|-------------|----------|-------------|-------------|-------------|-------------|
| 50.01876452 |          |             |             |             |             |
| NMRAL1      | NMRAL1   | 2093.773159 | 2089.918118 | 1475.22456  |             |
| 2050.769345 |          |             |             |             |             |
| UPB1        | UPB1     | 1.041678189 | 0           | 10.03554123 | 11.76912106 |
| RRP8        | RRP8     | 2204.191047 | 1628.621954 | 2454.24736  |             |
| 2364.612574 |          |             |             |             |             |
| CLK4        | CLK4     | 1103.137202 | 1185.81285  | 1999.302824 |             |
| 1690.830393 |          |             |             |             |             |
| NCK2        | NCK2     | 5141.723539 | 2662.136643 | 6840.893936 |             |
| 5105.837022 |          |             |             |             |             |
| MFSD2B      | MFSD2B   | 4.166712755 | 3.521344766 | 2.230120273 |             |
| 6.865320621 |          |             |             |             |             |
| IGFBPL1     | IGFBPL1  | 1.041678189 | 0           | 0           | 0           |
| B4GALT7     | B4GALT7  | 853.1344365 | 670.8161779 | 1194.229406 |             |
| 984.683129  |          |             |             |             |             |
| C22orf29    | C22orf29 |             | 1151.054399 | 1283.530167 |             |
| 1130.670978 |          | 1262.238234 |             |             |             |
| SH3RF1      | SH3RF1   | 44.79216211 | 90.67462772 | 50.17770613 |             |
| 25.49976231 |          |             |             |             |             |
| GLIS2       | GLIS2    | 4.166712755 | 9.683698106 | 5.575300681 |             |
| 8.826840798 |          |             |             |             |             |
| ZSCAN25     | ZSCAN25  | 1728.144115 | 1578.442791 | 1912.328134 |             |
| 2063.519227 |          |             |             |             |             |
| IRGM        | IRGM     | 0           | 10.5640343  | 21.18614259 | 25.49976231 |
| ITGB7       | ITGB7    | 27431.55342 | 16767.76344 | 9265.034672 |             |
| 8394.325599 |          |             |             |             |             |
| ADIPOR1     | ADIPOR1  | 15916.84272 | 11235.73081 | 13019.44215 |             |
| 11813.25527 |          |             |             |             |             |
| RFT1        | RFT1     | 4567.758857 | 3643.711496 | 3244.824997 |             |
| 3670.985012 |          |             |             |             |             |
| CREB3L1     | CREB3L1  | 6.250069132 | 1.760672383 | 3.345180409 |             |
| 4.903800443 |          |             |             |             |             |
| RPUSD3      | RPUSD3   | 4283.380712 | 3006.348094 | 2805.491303 |             |
| 3383.622306 |          |             |             |             |             |
| C9orf152    | C9orf152 |             | 2.083356377 | 0           | 0           |
| PAPLN       | PAPLN    | 37.50041479 | 44.89714576 | 57.98312709 | 0           |
| 32.36508293 |          |             |             |             |             |
| IL12A       | IL12A    | 213.5440287 | 228.8874098 | 82.51445008 |             |
| 45.11496408 |          |             |             |             |             |
| PSMB3       | PSMB3    | 24657.5644  | 18506.42742 | 18179.94046 |             |
| 15850.06379 |          |             |             |             |             |
| PSMC3       | PSMC3    | 18582.49721 | 14632.06784 | 11709.24649 |             |
| 14358.3277  |          |             |             |             |             |
| PBX2        | PBX2     | 0           | 0           | 0.980760089 |             |
| SMIM12      | SMIM12   | 5513.602653 | 4300.442295 | 4987.66399  |             |
| 5212.739871 |          |             |             |             |             |
| CALM2       | CALM2    | 50838.06232 | 40027.12595 | 49927.93266 |             |
| 46380.14459 |          |             |             |             |             |
| ZNF575      | ZNF575   | 53.12558762 | 96.83698106 | 55.75300681 |             |
| 88.26840798 |          |             |             |             |             |

|             |           |               |             |               |
|-------------|-----------|---------------|-------------|---------------|
| MCMDC2      | MCMDC2    | 446.879943    | 620.637015  | 1742.838993   |
| 1011.163651 |           |               |             |               |
| SEMA3G      | SEMA3G    | 17.70852921   | 79.23025723 | 56.86806695   |
| 22.55748204 |           |               |             |               |
| ESYT3       | ESYT3     | 7.291747321   | 14.96571525 | 0 10.78836098 |
| C10orf25    | C10orf25  |               | 93.75103698 | 122.3667306   |
| 159.4535995 |           | 107.8836098   |             |               |
| ENDOG       | ENDOG     | 3180.24351    | 2196.438798 | 2547.912411   |
| 2638.244639 |           |               |             |               |
| GRAP        | GRAP      | 1253.138861   | 1203.419574 | 1975.886561   |
| 1342.660561 |           |               |             |               |
| FXR1        | FXR1      | 3846.917551   | 3739.668141 | 4188.165872   |
| 3199.239409 |           |               |             |               |
| FBX016      | FBX016    | 6.250069132   | 17.60672383 | 8.92048109    |
| 5.884560532 |           |               |             |               |
| TSKU        | TSKU      | 2.083356377   | 31.69210289 | 30.10662368   |
| 52.96104479 |           |               |             |               |
| SNORD58A    | SNORD58A  |               | 12.50013826 | 2.641008574   |
| 23.41626286 |           | 10.78836098   |             |               |
| CYS1        | CYS1      | 183.3353612   | 348.6131318 | 15.61084191   |
| 67.67244612 |           |               |             |               |
| TEX30       | TEX30     | 6162.568164   | 4590.953238 | 3476.757505   |
| 3393.429907 |           |               |             |               |
| LRRC1       | LRRC1     | 213.5440287   | 276.4255641 | 236.3927489   |
| 201.0558182 |           |               |             |               |
| LY6G5B      | LY6G5B    | 3.125034566   | 4.401680957 | 0 2.942280266 |
| OVOL2       | OVOL2     | 0 1.760672383 | 0           | 0.980760089   |
| ABHD17C     | ABHD17C   | 203.1272468   | 310.7586756 | 388.0409274   |
| 479.5916834 |           |               |             |               |
| UBQLN4      | UBQLN4    | 807.3005962   | 1278.24815  | 1176.388444   |
| 1121.989541 |           |               |             |               |
| ATHL1       | ATHL1     | 725.0080193   | 1498.332198 | 563.1053688   |
| 1733.983837 |           |               |             |               |
| KIAA0196    | KIAA0196  |               | 7206.329709 | 7246.047192   |
| 4156.944188 |           | 5524.621579   |             |               |
| RNMT        | RNMT      | 1346.889898   | 1544.10968  | 2066.206433   |
| 1733.983837 |           |               |             |               |
| CCNE2       | CCNE2     | 7378.206611   | 4616.482988 | 3305.038244   |
| 2847.146537 |           |               |             |               |
| LRGUK       | LRGUK     | 3.125034566   | 2.641008574 | 5.575300681   |
| 1.961520177 |           |               |             |               |
| OSM         | OSM       | 12424.09576   | 5041.685368 | 3629.520744   |
| 1657.48455  |           |               |             |               |
| LINC00563   | LINC00563 |               | 1.041678189 | 11.44437049   |
| 53.52288654 |           | 7.846080709   |             |               |
| C1orf213    | C1orf213  |               | 34.37538023 | 58.10218863   |
| 70.24878858 |           | 68.65320621   |             |               |
| MIR339      | MIR339    | 0 1.760672383 | 14.49578177 | 0.980760089   |
| LINC01252   | LINC01252 |               | 7.291747321 | 13.20504287   |
| 5.575300681 |           | 1.961520177   |             |               |

|              |              |             |             |             |
|--------------|--------------|-------------|-------------|-------------|
| LYSMD3       | LYSMD3       | 2483.360802 | 2476.385707 | 3208.028012 |
| 1902.674572  |              |             |             |             |
| LMOD3        | LMOD3        | 8.33342551  | 12.32470668 | 5.575300681 |
| 6.865320621  |              |             |             |             |
| COL19A1      | COL19A1      | 8.33342551  | 6.16235334  | 2.230120273 |
| 10.78836098  |              |             |             |             |
| GEMIN4       | GEMIN4       | 5596.936908 | 4838.327708 | 4669.871851 |
| 5473.622055  |              |             |             |             |
| ZNF891       | ZNF891       | 165.626832  | 128.529084  | 372.4300855 |
| 166.7292151  |              |             |             |             |
| CLOCK        | CLOCK        | 602.0899931 | 613.5943254 | 674.6113824 |
| 433.4959592  |              |             |             |             |
| OR1L3        | OR1L3        | 2.083356377 | 0           | 0           |
| XCR1         | XCR1         | 1.041678189 | 0           | 8.826840798 |
| RSG1         | RSG1         | 66.66740408 | 98.59765344 | 36.7969845  |
| 91.21068825  |              |             |             |             |
| UFSP1        | UFSP1        | 21.87524196 | 22.88874098 | 76.9391494  |
| 42.17268381  |              |             |             |             |
| BTD          | BTD          | 973.9691064 | 914.6693029 | 870.8619664 |
| 792.4541516  |              |             |             |             |
| CDC37L1      | CDC37L1      | 748.9666177 | 801.9862704 | 1573.349852 |
| 1162.200705  |              |             |             |             |
| SLURP1       | SLURP1       | 0           | 1.760672383 | 0           |
| METTL25      | METTL25      | 595.8399239 | 449.8517938 | 422.6077916 |
| 538.4372887  |              |             |             |             |
| TDRD12       | TDRD12       | 39.58377117 | 0           | 18.95602232 |
| NSMAF        | NSMAF        | 6606.323073 | 5415.82825  | 4774.687503 |
| 5857.09925   |              |             |             |             |
| LGALS3BP     | LGALS3BP     |             | 6813.617032 | 3462.362241 |
| 11983.55128  | 4893.012082  |             |             |             |
| LOC100507431 | LOC100507431 |             | 0           | 3.521344766 |
| 4.903800443  |              |             |             | 1.115060136 |
| MPP6         | MPP6         | 546.8810491 | 617.1156702 | 660.1156007 |
| 420.746078   |              |             |             |             |
| TSC22D4      | TSC22D4      | 858.3428275 | 2102.242825 | 941.110755  |
| 989.5869295  |              |             |             |             |
| PROKR2       | PROKR2       | 0           | 1.760672383 | 0           |
| LOC101927415 | LOC101927415 |             | 19.79188559 | 15.84605145 |
| 31.22168382  | 39.23040355  |             |             |             |
| CAPN6        | CAPN6        | 2.083356377 | 0           | 0           |
| DUPD1        | DUPD1        | 8.33342551  | 10.5640343  | 7.805420954 |
| 8.826840798  |              |             |             |             |
| C4orf47      | C4orf47      | 2.083356377 | 3.521344766 | 1.115060136 |
| 6.865320621  |              |             |             |             |
| OIP5         | OIP5         | 2325.025717 | 2162.986022 | 984.5981003 |
| 1339.718281  |              |             |             |             |
| ATP6V0A2     | ATP6V0A2     |             | 6403.195826 | 5663.20272  |
| 6526.446978  | 6997.723233  |             |             |             |
| CKMT1A       | CKMT1A       | 2.083356377 | 2.641008574 | 3.345180409 |
| 0.980760089  |              |             |             |             |

|             |           |             |             |             |             |
|-------------|-----------|-------------|-------------|-------------|-------------|
| FAM168B     | FAM168B   | 4509.424879 | 6185.242081 | 5507.282013 |             |
| 5103.875501 |           |             |             |             |             |
| FLG2        | FLG2      | 0           | 0.880336191 | 4.460240545 | 0           |
| ZSCAN5B     | ZSCAN5B   | 3.125034566 | 4.401680957 | 1.115060136 | 0           |
| FAM132A     | FAM132A   | 2.083356377 | 7.042689532 | 4.460240545 |             |
| 7.846080709 |           |             |             |             |             |
| KIF4B       | KIF4B     | 5.208390943 | 3.521344766 | 1.115060136 |             |
| 2.942280266 |           |             |             |             |             |
| RPS6KL1     | RPS6KL1   | 114.5846008 | 137.3324459 | 60.21324736 |             |
| 76.49928692 |           |             |             |             |             |
| CTF1        | CTF1      | 10.41678189 | 9.683698106 | 18.95602232 |             |
| 17.6536816  |           |             |             |             |             |
| CREBL2      | CREBL2    | 2938.57417  | 3210.58609  | 3712.035194 |             |
| 3597.428005 |           |             |             |             |             |
| HSD17B6     | HSD17B6   | 122.9180263 | 136.4521097 | 84.74457036 |             |
| 124.5565313 |           |             |             |             |             |
| HSPH1       | HSPH1     | 21597.11389 | 13960.37132 | 21211.78897 |             |
| 17013.24526 |           |             |             |             |             |
| FBP2        | FBP2      | 2.083356377 | 0           | 1.961520177 |             |
| DLK1        | DLK1      | 1.041678189 | 0           | 0           |             |
| MAP1LC3B2   | MAP1LC3B2 |             | 34.37538023 | 73.06790389 |             |
| 61.32830749 |           | 46.09572417 |             |             |             |
| MT1A        | MT1A      | 2.083356377 | 12.32470668 | 7.805420954 |             |
| 6.865320621 |           |             |             |             |             |
| AQP6        | AQP6      | 18.7502074  | 1.760672383 | 14.49578177 |             |
| 11.76912106 |           |             |             |             |             |
| CNPY1       | CNPY1     | 0           | 0.880336191 | 0           | 0           |
| CKAP2L      | CKAP2L    | 3273.994547 | 3471.165603 | 1859.920307 |             |
| 2221.421601 |           |             |             |             |             |
| ENTHD1      | ENTHD1    | 27.08363291 | 16.72638764 | 27.87650341 |             |
| 22.55748204 |           |             |             |             |             |
| PXMP2       | PXMP2     | 1303.139414 | 1287.931848 | 500.6620012 |             |
| 747.3391876 |           |             |             |             |             |
| UBXN4       | UBXN4     | 11173.04025 | 9864.167025 | 9075.474449 |             |
| 9749.736041 |           |             |             |             |             |
| TRABD       | TRABD     | 6549.030772 | 6016.217532 | 3629.520744 |             |
| 4579.168854 |           |             |             |             |             |
| OSMR        | OSMR      | 2.083356377 | 10.5640343  | 1.115060136 |             |
| 6.865320621 |           |             |             |             |             |
| HSPB8       | HSPB8     | 0           | 0.880336191 | 0           | 0           |
| PISD        | PISD      | 2775.030695 | 2702.632108 | 2675.029267 |             |
| 3561.139882 |           |             |             |             |             |
| TMEM50A     | TMEM50A   | 16768.93548 | 12079.97322 | 13326.08369 |             |
| 10841.32202 |           |             |             |             |             |
| ATG2B       | ATG2B     | 809.3839526 | 1731.621289 | 1450.693237 |             |
| 1305.391678 |           |             |             |             |             |
| LOC79999    | LOC79999  |             | 1.041678189 | 0           | 2.230120273 |
| 0           |           |             |             |             |             |
| CDKL4       | CDKL4     | 48.95887487 | 29.05109432 | 7.805420954 |             |
| 25.49976231 |           |             |             |             |             |

|              |              |             |             |             |
|--------------|--------------|-------------|-------------|-------------|
| KDM4D        | KDM4D        | 173.9602575 | 97.71731725 | 120.4264947 |
| 102.9798093  |              |             |             |             |
| METTL24      | METTL24      | 0           | 0           | 6.690360818 |
| 5.884560532  |              |             |             |             |
| SYCE2        | SYCE2        | 73.9591514  | 161.9818592 | 117.0813143 |
| 115.7296905  |              |             |             |             |
| MBD2         | MBD2         | 6560.489232 | 5400.862534 | 3955.118303 |
| 4860.646999  |              |             |             |             |
| ZNF772       | ZNF772       | 477.0886104 | 407.5956566 | 651.1951196 |
| 357.9774324  |              |             |             |             |
| CRYBA1       | CRYBA1       | 0           | 0.880336191 | 6.690360818 |
| 3.923040355  |              |             |             |             |
| CHKB         | CHKB         | 1933.354718 | 2888.383044 | 2070.666673 |
| 2806.935374  |              |             |             |             |
| C17orf78     | C17orf78     |             | 2.083356377 | 2.641008574 |
| 12.2656615   | 2.942280266  |             |             |             |
| WSCD1        | WSCD1        | 0           | 0           | 3.923040355 |
|              |              |             |             |             |
| BICD2        | BICD2        | 2340.65089  | 2923.596492 | 2671.684086 |
| 2292.036327  |              |             |             |             |
| SELK         | SELK         | 6718.824317 | 5100.667893 | 5816.153671 |
| 4256.498785  |              |             |             |             |
| NTN4         | NTN4         | 1.041678189 | 18.48706002 | 0           |
| 33.34584301  |              |             |             |             |
| PHF11        | PHF11        | 3445.871448 | 2250.139305 | 4908.49472  |
| 3639.600689  |              |             |             |             |
| SKIDA1       | SKIDA1       | 1.041678189 | 0           | 0           |
|              |              |             |             |             |
| HN1L         | HN1L         | 2264.608382 | 2599.632773 | 1701.581768 |
| 1556.466261  |              |             |             |             |
| FSTL3        | FSTL3        | 58.33397857 | 54.58084387 | 212.976486  |
| 75.51852683  |              |             |             |             |
| FRMD4B       | FRMD4B       | 4946.929718 | 5085.702178 | 2905.846715 |
| 4602.707096  |              |             |             |             |
| INTU         | INTU         | 6.250069132 | 7.042689532 | 0           |
| 8.826840798  |              |             |             |             |
| KDELR1       | KDELR1       | 1179.17971  | 1530.904637 | 1130.670978 |
| 1163.181465  |              |             |             |             |
| OAZ3         | OAZ3         | 1890.645912 | 1277.367814 | 1509.791425 |
| 1305.391678  |              |             |             |             |
| GCM2         | GCM2         | 0           | 0.880336191 | 2.230120273 |
|              |              |             |             |             |
| GPR55        | GPR55        | 401.0461026 | 641.7650836 | 182.8698623 |
| 121.614251   |              |             |             |             |
| MAPKAPK3     | MAPKAPK3     |             | 14860.58104 | 9646.723986 |
| 9435.638873  | 9495.719178  |             |             |             |
| CD2AP        | CD2AP        | 722.924663  | 1181.411169 | 1726.113091 |
| 1162.200705  |              |             |             |             |
| TUBE1        | TUBE1        | 1698.977126 | 1347.794709 | 1946.894998 |
| 1905.616852  |              |             |             |             |
| TPX2         | TPX2         | 18368.95318 | 16805.61789 | 8065.229966 |
| 11713.21774  |              |             |             |             |
| CCDC147-AS1  | CCDC147-AS1  |             | 12.50013826 | 13.20504287 |
| 47.94758586  | 22.55748204  |             |             |             |
| LOC102577426 | LOC102577426 |             | 2.083356377 | 4.401680957 |
| 4.460240545  | 2.942280266  |             |             |             |
| TYK2         | TYK2         | 8385.509419 | 9521.716247 | 6460.65843  |

|                 |               |               |             |  |  |   |
|-----------------|---------------|---------------|-------------|--|--|---|
| 8087.347691     |               |               |             |  |  |   |
| RASA3 RASA3     | 3418.787815   | 5968.679378   | 2479.893743 |  |  |   |
| 3335.565062     |               |               |             |  |  |   |
| RALY RALY       | 14867.87279   | 13757.01366   | 12009.19767 |  |  |   |
| 12207.52082     |               |               |             |  |  |   |
| ARHGAP31        | ARHGAP31      | 832.3008728   | 336.2884251 |  |  |   |
| 1187.539045     | 841.4921561   |               |             |  |  |   |
| POLR2K POLR2K   | 5382.351201   | 5396.460854   | 5318.83685  |  |  |   |
| 5299.046759     |               |               |             |  |  |   |
| LOC101927043    | LOC101927043  | 2.083356377   | 0 0 0       |  |  |   |
| LOC100506457    | LOC100506457  | 0 0           | 3.345180409 |  |  | 0 |
| FUCA2 FUCA2     | 2376.067948   | 1743.065659   | 1257.787834 |  |  |   |
| 1433.87125      |               |               |             |  |  |   |
| SCRG1 SCRG1     | 1.041678189   | 1.760672383   | 4.460240545 |  |  |   |
| 2.942280266     |               |               |             |  |  |   |
| MRPS5 MRPS5     | 6102.150829   | 4249.382796   | 4658.721249 |  |  |   |
| 4692.937024     |               |               |             |  |  |   |
| SLC35A4 SLC35A4 | 12514.72176   | 9284.905811   | 11169.55739 |  |  |   |
| 10698.13105     |               |               |             |  |  |   |
| CCDC104 CCDC104 | 557.297831    | 832.7980371   | 867.516786  |  |  |   |
| 1080.797618     |               |               |             |  |  |   |
| TSPAN3 TSPAN3   | 2379.192983   | 2574.98336    | 3305.038244 |  |  |   |
| 3160.989766     |               |               |             |  |  |   |
| GPX7 GPX7       | 1260.430608   | 1357.478407   | 943.3408753 |  |  |   |
| 1095.509019     |               |               |             |  |  |   |
| GLB1L2 GLB1L2   | 130.2097736   | 348.6131318   | 121.5415549 |  |  |   |
| 344.2467911     |               |               |             |  |  |   |
| CLMP CLMP       | 32.29202385   | 57.22185244   | 36.7969845  |  |  |   |
| 82.38384745     |               |               |             |  |  |   |
| VLDLR VLDLR     | 81.25089872   | 136.4521097   | 103.7005927 |  |  |   |
| 144.171733      |               |               |             |  |  |   |
| LINC01506       | LINC01506     | 3.125034566   | 2.641008574 |  |  | 0 |
| 0               |               |               |             |  |  |   |
| DPP9-AS1        | DPP9-AS1      | 1621.89294    | 1125.069653 |  |  |   |
| 1260.017954     | 1191.623508   |               |             |  |  |   |
| LOC100287036    | LOC100287036  | 1.041678189   | 13.20504287 |  |  |   |
| 10.03554123     | 8.826840798   |               |             |  |  |   |
| REX01 REX01     | 756.258365    | 875.0541743   | 531.883685  |  |  |   |
| 655.1477392     |               |               |             |  |  |   |
| DLL4 DLL4       | 0 0           | 16.72590204   | 0           |  |  |   |
| LOC100270746    | LOC100270746  | 0 2.641008574 | 0           |  |  |   |
| 0.980760089     |               |               |             |  |  |   |
| RAB5A RAB5A     | 6980.285542   | 4655.21778    | 4935.256163 |  |  |   |
| 5045.029896     |               |               |             |  |  |   |
| GEMIN8P4        | GEMIN8P4      | 51.04223125   | 36.09378385 |  |  |   |
| 80.28432981     | 44.13420399   |               |             |  |  |   |
| STX19 STX19     | 0 5.282017149 | 0             | 0           |  |  |   |
| C8orf82 C8orf82 | 531.2558762   | 597.748274    | 547.4945269 |  |  |   |
| 754.2045082     |               |               |             |  |  |   |
| DENND6B DENND6B | 200.0022122   | 170.7852211   | 196.250584  |  |  |   |

|             |             |             |             |             |             |
|-------------|-------------|-------------|-------------|-------------|-------------|
| 154.960094  |             |             |             |             |             |
| TMEM198     | TMEM198     | 3.125034566 | 23.76907717 | 11.15060136 |             |
| 20.59596186 |             |             |             |             |             |
| MIR1184-1   | MIR1184-1   |             | 405.2128154 | 410.2366652 |             |
| 473.9005579 | 553.14869   |             |             |             |             |
| MIR3194     | MIR3194     | 1.041678189 | 5.282017149 | 0           | 0           |
| MIR3192     | MIR3192     | 1.041678189 | 0           | 0           | 0           |
| MIR320E     | MIR320E     | 3.125034566 | 1.760672383 | 11.15060136 |             |
| 1.961520177 |             |             |             |             |             |
| PRPF8       | PRPF8       | 20886.68936 | 37539.29588 | 29755.37974 |             |
| 29105.03639 |             |             |             |             |             |
| MYH7        | MYH7        | 50.00055306 | 11.44437049 | 72.47890886 |             |
| 14.71140133 |             |             |             |             |             |
| POLR2M      | POLR2M      | 2923.990676 | 3170.970962 | 4261.759841 |             |
| 3690.600214 |             |             |             |             |             |
| SPAST       | SPAST       | 1757.311104 | 2173.550057 | 1334.726983 |             |
| 1591.773624 |             |             |             |             |             |
| DPY19L2P3   | DPY19L2P3   |             | 0           | 5.282017149 | 5.575300681 |
| 5.884560532 |             |             |             |             |             |
| VPS9D1-AS1  | VPS9D1-AS1  |             | 120.8346699 | 165.503204  |             |
| 131.5770961 | 143.1909729 |             |             |             |             |
| TMEM198B    | TMEM198B    |             | 259.377869  | 454.2534748 |             |
| 113.7361339 | 299.131827  |             |             |             |             |
| PCDHGB3     | PCDHGB3     | 4.166712755 | 4.401680957 | 33.45180409 |             |
| 12.74988115 |             |             |             |             |             |
| ACAD11      | ACAD11      | 693.7576737 | 691.0639103 | 716.9836676 |             |
| 1252.430633 |             |             |             |             |             |
| DNAJC30     | DNAJC30     | 498.9638524 | 484.1849053 | 850.790884  |             |
| 559.0332505 |             |             |             |             |             |
| NRK         | NRK         | 0           | 0           | 0.980760089 |             |
| FOXK2       | FOXK2       | 494.7971396 | 1217.504953 | 526.3083843 |             |
| 600.2251743 |             |             |             |             |             |
| NBN         | NBN         | 4838.595187 | 4653.457108 | 5488.325991 |             |
| 4521.304009 |             |             |             |             |             |
| AAK1        | AAK1        | 1788.56145  | 2507.197473 | 1857.690187 |             |
| 1733.983837 |             |             |             |             |             |
| GNA14       | GNA14       | 2.083356377 | 0.880336191 | 0           | 3.923040355 |
| ASUN        | ASUN        | 6436.529528 | 4010.811688 | 4308.592367 |             |
| 4824.358876 |             |             |             |             |             |
| DNAJC17     | DNAJC17     | 1323.972978 | 1155.881419 | 997.978822  |             |
| 1344.622082 |             |             |             |             |             |
| VSTM2B      | VSTM2B      | 0           | 1.760672383 | 0           | 0           |
| NYX         | NYX         | 0           | 1.760672383 | 0           | 0           |
| TCEB3B      | TCEB3B      | 0           | 1.760672383 | 0           | 0           |
| MAPRE3      | MAPRE3      | 34.37538023 | 44.89714576 | 82.51445008 |             |
| 126.5180514 |             |             |             |             |             |
| RARRES3     | RARRES3     | 2383.359696 | 4546.056093 | 5923.199444 |             |
| 3787.695462 |             |             |             |             |             |
| MMP20       | MMP20       | 0           | 1.760672383 | 0           | 0.980760089 |
| DUSP19      | DUSP19      | 93.75103698 | 211.2806859 | 151.6481785 |             |

|                 |                 |                 |  |               |   |
|-----------------|-----------------|-----------------|--|---------------|---|
| 152.0178137     |                 |                 |  |               |   |
| RALGAPA1        | RALGAPA1        | 1445.849326     |  | 1405.896898   |   |
| 1960.27572      | 1316.180039     |                 |  |               |   |
| C17orf70        | C17orf70        | 1979.188559     |  | 2364.58301    |   |
| 1844.309465     | 2544.09167      |                 |  |               |   |
| MYL12A MYL12A   | 50104.72088     | 40779.8134      |  | 35698.65026   |   |
| 36227.31616     |                 |                 |  |               |   |
| OSTF1 OSTF1     | 10807.41121     | 13033.37731     |  | 5042.301936   |   |
| 7300.7781       |                 |                 |  |               |   |
| ELL ELL         | 1982.313593     | 1741.304987     |  | 2074.011853   |   |
| 2006.635141     |                 |                 |  |               |   |
| TWSG1 TWSG1     | 1290.639276     | 685.7818931     |  | 1430.622155   |   |
| 582.5714927     |                 |                 |  |               |   |
| FSTL4 FSTL4     | 0 1.760672383 0 |                 |  | 0.980760089   |   |
| LINC00899       | LINC00899       | 60.41733494     |  | 32.57243908   |   |
| 92.54999131     | 64.73016585     |                 |  |               |   |
| GUSBP1 GUSBP1   | 478.1302886     | 403.1939757     |  | 398.0764686   |   |
| 377.5926341     |                 |                 |  |               |   |
| BSN-AS2 BSN-AS2 | 8.33342551      | 8.803361914     |  | 0 0.980760089 |   |
| MORC2-AS1       | MORC2-AS1       | 243.7526962     |  | 351.2541404   |   |
| 349.0138227     | 218.7094998     |                 |  |               |   |
| RPL21P28        | RPL21P28        | 27221.13443     |  | 26889.86897   |   |
| 45047.31444     | 33644.97484     |                 |  |               |   |
| KLHL22 KLHL22   | 1548.975467     | 1258.000418     |  | 1106.139655   |   |
| 1084.720658     |                 |                 |  |               |   |
| EPHA1-AS1       | EPHA1-AS1       | 0 0             |  | 18.95602232   |   |
| 24.51900222     |                 |                 |  |               |   |
| LINC01116       | LINC01116       | 1.041678189     |  | 0 0 0         |   |
| TMLHE-AS1       | TMLHE-AS1       | 2.083356377     |  | 2.641008574   |   |
| 2.230120273     | 7.846080709     |                 |  |               |   |
| LINC00892       | LINC00892       | 2780.239086     |  | 1777.398771   |   |
| 1365.948667     | 1546.65866      |                 |  |               |   |
| LOC284865       | LOC284865       | 0 0             |  | 6.690360818   | 0 |
| TOB1-AS1        | TOB1-AS1        | 35.41705842     |  | 88.03361914   |   |
| 49.062646       | 59.82636541     |                 |  |               |   |
| MIR4446 MIR4446 | 3.125034566     | 0 3.345180409 0 |  |               |   |
| UBL7-AS1        | UBL7-AS1        | 586.4648202     |  | 649.6881093   |   |
| 349.0138227     | 462.9187619     |                 |  |               |   |
| SLC8A1-AS1      | SLC8A1-AS1      | 233.3359143     |  | 364.4591833   |   |
| 61.32830749     | 129.4603317     |                 |  |               |   |
| LOC286437       | LOC286437       | 11.45846008     |  | 29.93143051   |   |
| 59.09818722     | 41.19192372     |                 |  |               |   |
| CACNA1G-AS1     | CACNA1G-AS1     | 3.125034566     |  | 0.880336191   | 0 |
| 0               |                 |                 |  |               |   |
| LINC00629       | LINC00629       | 7.291747321     |  | 9.683698106   | 0 |
| 0               |                 |                 |  |               |   |
| EHHADH-AS1      | EHHADH-AS1      | 41.66712755     |  | 58.10218863   |   |
| 12.2656615      | 32.36508293     |                 |  |               |   |
| RNASEH1-AS1     | RNASEH1-AS1     | 470.8385413     |  | 307.2373308   |   |
| 461.6348964     | 384.4579548     |                 |  |               |   |



|             |            |             |             |             |
|-------------|------------|-------------|-------------|-------------|
| ABCC2       | ABCC2      | 15.62517283 | 25.52974955 | 88.08975076 |
| 43.1534439  |            |             |             |             |
| HSF1        | HSF1       | 1281.264172 | 2106.644506 | 1305.73542  |
| 1252.430633 |            |             |             |             |
| ANKRD9      | ANKRD9     | 250.0027653 | 270.2632108 | 172.8343211 |
| 231.4593809 |            |             |             |             |
| IFNGR1      | IFNGR1     | 2177.107414 | 1977.235086 | 3616.140022 |
| 3002.106631 |            |             |             |             |
| GPR137B     | GPR137B    | 538.5476236 | 511.4753272 | 671.266202  |
| 706.1472638 |            |             |             |             |
| ID3         | ID3        | 454.1716903 | 889.1395534 | 893.1631691 |
| 1568.235382 |            |             |             |             |
| ID2         | ID2        | 7001.119106 | 6598.119755 | 7408.459545 |
| 7786.254344 |            |             |             |             |
| ID01        | ID01       | 0           | 51.29276627 | 7.846080709 |
| IRF8        | IRF8       | 664.5906844 | 789.6615637 | 3684.15869  |
| 8610.092818 |            |             |             |             |
| ICAM3       | ICAM3      | 6170.90159  | 5824.304243 | 4039.862874 |
| 5455.968373 |            |             |             |             |
| PPIC        | PPIC       | 1.041678189 | 0           | 3.345180409 |
| SIM1        | SIM1       | 4.166712755 | 64.26454197 | 0           |
| MORN3       | MORN3      | 91.66768061 | 61.6235334  | 124.8867353 |
| 160.8446545 |            |             |             |             |
| VGLL3       | VGLL3      | 1.041678189 | 0.880336191 | 1.115060136 |
| 0.980760089 |            |             |             |             |
| ATXN7L3     | ATXN7L3    | 941.6770826 | 2479.026715 | 1090.528813 |
| 1037.644174 |            |             |             |             |
| TRAPPC2L    | TRAPPC2L   |             | 3995.877532 | 2973.775655 |
| 3677.468329 | 2768.68573 |             |             |             |
| SCN4A       | SCN4A      | 0           | 14.08537906 | 0           |
| BOP1        | BOP1       | 7854.253543 | 4879.703509 | 5576.415741 |
| 6418.09402  |            |             |             |             |
| SLC22A13    | SLC22A13   |             | 2.083356377 | 0           |
| 14.71140133 |            |             |             | 14.49578177 |
| POLD3       | POLD3      | 4512.549913 | 4378.792216 | 2987.246105 |
| 3688.638693 |            |             |             |             |
| PCDHGC3     | PCDHGC3    | 4.166712755 | 5.282017149 | 43.48734531 |
| 10.78836098 |            |             |             |             |
| CNOT6L      | CNOT6L     | 1872.937383 | 3668.36091  | 2805.491303 |
| 3031.529434 |            |             |             |             |
| RBM42       | RBM42      | 5464.643778 | 5476.571447 | 3713.150254 |
| 4146.653655 |            |             |             |             |
| NAV1        | NAV1       | 41.66712755 | 62.50386959 | 153.8782988 |
| 136.3256523 |            |             |             |             |
| GGT7        | GGT7       | 44.79216211 | 170.7852211 | 389.1559876 |
| 470.7648426 |            |             |             |             |
| GPR114      | GPR114     | 1472.932959 | 2431.488561 | 1116.175196 |
| 1320.103079 |            |             |             |             |
| CREG2       | CREG2      | 4.166712755 | 46.65781815 | 0           |
| TTL         | TTL        | 2510.444435 | 2203.481487 | 0.980760089 |
|             |            |             |             | 1910.098013 |

|              |              |             |             |             |             |
|--------------|--------------|-------------|-------------|-------------|-------------|
| 1968.385498  |              |             |             |             |             |
| SPICE1       | SPICE1       | 1017.71959  | 947.241742  | 944.4559354 |             |
| 1085.701418  |              |             |             |             |             |
| SNORD87      | SNORD87      | 20.83356377 | 22.00840479 | 65.78854804 |             |
| 63.74940576  |              |             |             |             |             |
| FLJ44313     | FLJ44313     |             | 0           | 2.641008574 | 0           |
| RNA45S5      | RNA45S5      | 13377.2313  | 661412.4267 | 36051.00927 | 0           |
| 22163.21648  |              |             |             |             |             |
| ZNF106       | ZNF106       | 6149.026348 | 6816.44313  | 5312.146489 |             |
| 5272.566237  |              |             |             |             |             |
| PDCD11       | PDCD11       | 4070.878361 | 4714.200305 | 4105.651422 |             |
| 4767.474791  |              |             |             |             |             |
| SGTB         | SGTB         | 1062.511752 | 1052.001749 | 1242.176992 |             |
| 993.5099698  |              |             |             |             |             |
| HIST1H2AB    | HIST1H2AB    |             | 10.41678189 | 33.45277527 |             |
| 13.38072164  | 15.69216142  |             |             |             |             |
| HIST1H2AC    | HIST1H2AC    |             | 494.7971396 | 353.895149  |             |
| 324.4824997  | 250.0938226  |             |             |             |             |
| ARL6IP5      | ARL6IP5      | 23284.63255 | 19441.34445 | 16916.57733 |             |
| 14666.28637  |              |             |             |             |             |
| NUP93        | NUP93        | 11778.25528 | 9519.075238 | 8600.458831 |             |
| 10158.713    |              |             |             |             |             |
| ZNF548       | ZNF548       | 635.4236951 | 848.6440885 | 1098.334234 |             |
| 1043.528734  |              |             |             |             |             |
| STAU1        | STAU1        | 6013.608183 | 5832.227268 | 6500.800594 |             |
| 6120.923713  |              |             |             |             |             |
| PGP          | PGP          | 3062.533875 | 2693.828746 | 1969.196201 |             |
| 2093.922789  |              |             |             |             |             |
| ZNF486       | ZNF486       | 265.6279381 | 249.1351422 | 469.4403174 |             |
| 411.9192372  |              |             |             |             |             |
| RCSD1        | RCSD1        | 15508.50487 | 12543.91039 | 5879.712099 |             |
| 7898.060994  |              |             |             |             |             |
| NTNG2        | NTNG2        | 111.4595662 | 115.3240411 | 40.14216491 |             |
| 31.38432284  |              |             |             |             |             |
| ACOT13       | ACOT13       | 2581.278552 | 3432.43081  | 2411.875075 |             |
| 2628.437038  |              |             |             |             |             |
| LOC100289333 | LOC100289333 |             | 0           | 0           | 3.345180409 |
| 10.78836098  |              |             |             |             |             |
| LOC102546294 | LOC102546294 |             | 4.166712755 | 12.32470668 |             |
| 10.03554123  | 16.67292151  |             |             |             |             |
| LOC100506142 | LOC100506142 |             | 5.208390943 | 8.803361914 |             |
| 5.575300681  | 0.980760089  |             |             |             |             |
| ERGIC2       | ERGIC2       | 4643.801365 | 3972.076896 | 5237.43746  |             |
| 4819.455076  |              |             |             |             |             |
| SLC13A1      | SLC13A1      | 0           | 0           | 5.575300681 | 0           |
| FAM20A       | FAM20A       | 3.125034566 | 6.16235334  | 0           | 17.6536816  |
| KISS1R       | KISS1R       | 28.12531109 | 80.99092961 | 33.45180409 |             |
| 254.9976231  |              |             |             |             |             |
| PARP10       | PARP10       | 7137.578949 | 4733.567701 | 8069.690206 |             |
| 5551.102102  |              |             |             |             |             |

|                         |               |               |             |
|-------------------------|---------------|---------------|-------------|
| MSANTD4 MSANTD4         | 1148.971042   | 1015.027629   | 1180.848684 |
| 979.7793286             |               |               |             |
| PLEKHM1P PLEKHM1P       | 456.2550466   | 536.1247406   |             |
| 607.7077743 486.457004  |               |               |             |
| FAM184B FAM184B         | 28.12531109   | 14.08537906   | 104.8156528 |
| 46.09572417             |               |               |             |
| ZXDB ZXDB               | 354.1705842   | 398.7922947   | 928.8450935 |
| 500.1876452             |               |               |             |
| MRPL15 MRPL15           | 6909.451426   | 4185.118254   | 5474.945269 |
| 5183.317069             |               |               |             |
| NELFB NELFB             | 1462.516177   | 3345.277527   | 1572.234792 |
| 1642.773149             |               |               |             |
| ACSM3 ACSM3             | 348.9621932   | 323.0833823   | 437.1035734 |
| 449.1881206             |               |               |             |
| DDX11 DDX11             | 2930.240745   | 3556.558213   | 1481.914921 |
| 3020.741073             |               |               |             |
| SLC7A60S SLC7A60S       | 1828.145221   | 1417.341268   |             |
| 2243.500994 1723.195476 |               |               |             |
| ZUFSP ZUFSP             | 1723.977402   | 1088.095533   | 1751.759474 |
| 1414.256048             |               |               |             |
| RILPL2 RILPL2           | 4068.795005   | 4124.375057   | 3296.117763 |
| 3592.524205             |               |               |             |
| UPRT UPRT               | 1512.51673    | 1172.607807   | 1480.799861 |
| 2137.076233             |               |               |             |
| RNF183 RNF183           | 0 0.880336191 | 5.575300681   | 0           |
| PITPNM2 PITPNM2         | 146.8766246   | 380.3052347   | 170.6042008 |
| 205.9596186             |               |               |             |
| MOC3 MOC3               | 979.1774974   | 838.0800542   | 1225.45109  |
| 1172.989066             |               |               |             |
| METTL7A METTL7A         | 250.0027653   | 548.4494473   | 102.5855325 |
| 166.7292151             |               |               |             |
| DCPS DCPS               | 4114.628845   | 4075.07623    | 3041.884052 |
| 3582.716604             |               |               |             |
| LYL1 LYL1               | 127.084739    | 57.22185244   | 85.85963049 |
| 70.61472638             |               |               |             |
| CCDC179 CCDC179         | 0 0           | 0 0.980760089 |             |
| ACTG2 ACTG2             | 104.1678189   | 45.77748195   | 406.9969497 |
| 107.8836098             |               |               |             |
| CAMK4 CAMK4             | 3445.871448   | 1883.039113   | 6108.299426 |
| 3362.045584             |               |               |             |
| LRP12 LRP12             | 528.1308417   | 868.8918209   | 318.907199  |
| 578.6484523             |               |               |             |
| AFG3L2 AFG3L2           | 5885.481766   | 4400.800621   | 4998.814591 |
| 5126.432983             |               |               |             |
| KANSL2 KANSL2           | 3965.668864   | 2891.024053   | 4582.89716  |
| 3623.908528             |               |               |             |
| TCIRG1 TCIRG1           | 6496.946863   | 7053.253566   | 4344.274291 |
| 6583.842475             |               |               |             |
| SH2B3 SH2B3             | 2532.319677   | 1367.162105   | 2492.159405 |
| 2131.191673             |               |               |             |

|           |           |             |             |             |             |
|-----------|-----------|-------------|-------------|-------------|-------------|
| ADPRHL1   | ADPRHL1   | 16.66685102 | 10.5640343  | 0           | 5.884560532 |
| LHFPL1    | LHFPL1    | 27.08363291 | 6.16235334  |             | 18.95602232 |
|           |           | 23.53824213 |             |             |             |
| EXOC8     | EXOC8     | 377.0875043 | 640.0044112 |             | 676.8415027 |
|           |           | 444.2843202 |             |             |             |
| ANKRD54   | ANKRD54   | 2588.570299 | 2148.020307 |             | 1673.705265 |
|           |           | 1623.157947 |             |             |             |
| C12orf60  | C12orf60  |             | 290.6282146 |             | 211.2806859 |
|           |           | 284.3403347 |             |             | 206.9403787 |
| PRTG      | PRTG      | 0           | 0           | 1.115060136 | 2.942280266 |
| HEATR3    | HEATR3    | 1028.136372 | 1007.984939 |             | 806.1884785 |
|           |           | 1088.643698 |             |             |             |
| ANKRD17   | ANKRD17   | 3275.036225 | 5021.437636 |             | 3846.95747  |
|           |           | 3557.216842 |             |             |             |
| DGCR14    | DGCR14    | 1468.766246 | 858.3277867 |             | 1315.770961 |
|           |           | 923.8760035 |             |             |             |
| GIMAP2    | GIMAP2    | 2156.273851 | 2525.684533 |             | 3291.657522 |
|           |           | 2111.576471 |             |             |             |
| SART1     | SART1     | 5270.891635 | 4619.123996 |             | 4786.953165 |
|           |           | 4785.128473 |             |             |             |
| SRSF9     | SRSF9     | 17301.23304 | 13529.88693 |             | 11428.25134 |
|           |           | 13482.50894 |             |             |             |
| GRM3      | GRM3      | 0           | 0           | 4.460240545 | 0           |
| DUSP10    | DUSP10    | 2230.233002 | 1534.425982 |             | 2143.145582 |
|           |           | 1379.929445 |             |             |             |
| CLC       | CLC       | 0           | 0.880336191 | 34.56686422 | 0           |
| CKS2      | CKS2      | 13154.31217 | 13576.54474 |             | 10108.02014 |
|           |           | 9288.7788   |             |             |             |
| LIPC      | LIPC      | 54.16726581 | 58.98252483 |             | 30.10662368 |
|           |           | 42.17268381 |             |             |             |
| CASC15    | CASC15    | 5.208390943 | 73.06790389 |             | 2.230120273 |
|           |           | 16.67292151 |             |             |             |
| CDIPT-AS1 | CDIPT-AS1 |             | 7.291747321 |             | 7.923025723 |
|           |           | 1.115060136 |             |             | 1.961520177 |
| HCG4      | HCG4      | 0           | 0.880336191 | 0           | 2.942280266 |
| GFI1B     | GFI1B     | 0           | 1.760672383 | 0           | 0           |
| ZNF671    | ZNF671    | 850.009402  | 850.4047609 |             | 1534.322748 |
|           |           | 1177.892866 |             |             |             |
| IL17RB    | IL17RB    | 3938.585231 | 389.1085966 |             | 1643.598641 |
|           |           | 179.4790962 |             |             |             |
| RLTPR     | RLTPR     | 3539.622485 | 6231.899899 |             | 2985.015985 |
|           |           | 5003.837972 |             |             |             |
| FAM153A   | FAM153A   | 1.041678189 | 5.282017149 |             | 23.41626286 |
|           |           | 15.69216142 |             |             |             |
| ZNF660    | ZNF660    | 1.041678189 | 0           | 12.2656615  | 0.980760089 |
| TOR1AIP1  | TOR1AIP1  |             | 14072.03065 |             | 9381.742792 |
|           |           | 9890.583409 |             |             | 9282.894239 |
| CEND1     | CEND1     | 171.8769011 | 193.6739621 |             | 41.25722504 |
|           |           | 81.40308736 |             |             |             |
| YWHAG     | YWHAG     | 379.1708607 | 1468.400767 |             | 564.220429  |

|                 |             |             |             |             |   |
|-----------------|-------------|-------------|-------------|-------------|---|
| 635.5325375     |             |             |             |             |   |
| BFAR BFAR       | 2726.07182  | 2609.316471 | 2826.677445 |             |   |
| 2199.844879     |             |             |             |             |   |
| NIPSNAP3A       | NIPSNAP3A   | 1767.727886 | 1333.70933  |             |   |
| 1291.239638     | 1217.12327  |             |             |             |   |
| NOL11 NOL11     | 8785.513843 | 5937.867611 | 8719.770266 |             |   |
| 8893.532484     |             |             |             |             |   |
| LOC645434       | LOC645434   | 0           | 0.880336191 | 0           | 0 |
| ARHGAP21        | ARHGAP21    | 352.0872278 | 912.0282943 |             |   |
| 291.0306956     | 307.9586678 |             |             |             |   |
| IGSF6 IGSF6     | 15.62517283 | 25.52974955 | 28.99156354 |             |   |
| 14.71140133     |             |             |             |             |   |
| SLC35A5 SLC35A5 | 2607.320506 | 2396.275113 | 2724.091913 |             |   |
| 2173.364356     |             |             |             |             |   |
| TMEM42 TMEM42   | 418.7546319 | 517.6376806 | 613.2830749 |             |   |
| 547.2641295     |             |             |             |             |   |
| ZNF439 ZNF439   | 150.0016592 | 130.2897563 | 331.1728605 |             |   |
| 407.9961969     |             |             |             |             |   |
| TICRR TICRR     | 996.8860266 | 2317.044856 | 712.5234271 |             |   |
| 1102.37434      |             |             |             |             |   |
| COL10A1 COL10A1 | 0           | 0.880336191 | 0           | 3.923040355 |   |
| TCN1 TCN1       | 0           | 0           | 3.923040355 |             |   |
| HGD HGD         | 2.083356377 | 2.641008574 | 11.15060136 |             | 0 |
| AMH AMH         | 5.208390943 | 11.44437049 | 12.2656615  |             |   |
| 4.903800443     |             |             |             |             |   |
| CDK8 CDK8       | 334.3786986 | 559.0134816 | 371.3150254 |             |   |
| 360.9197126     |             |             |             |             |   |
| ADAMTS20        | ADAMTS20    | 0           | 0           | 4.460240545 | 0 |
| PRDM12 PRDM12   | 0           | 0           | 0.980760089 |             |   |
| NDUFA13 NDUFA13 | 11650.12886 | 11476.06259 | 7715.101083 |             |   |
| 8785.648874     |             |             |             |             |   |
| ATIC ATIC       | 13641.81756 | 11113.36408 | 11006.75861 |             |   |
| 13285.37616     |             |             |             |             |   |
| SNN SNN         | 805.2172399 | 1029.993344 | 2423.025676 |             |   |
| 1827.156045     |             |             |             |             |   |
| HIST1H4I        | HIST1H4I    | 40.62544936 | 59.86286102 |             |   |
| 23.41626286     | 33.34584301 |             |             |             |   |
| GPLD1 GPLD1     | 28.12531109 | 58.10218863 | 122.656615  |             |   |
| 49.03800443     |             |             |             |             |   |
| BTBD18 BTBD18   | 19.79188559 | 22.00840479 | 33.45180409 |             |   |
| 38.24964346     |             |             |             |             |   |
| GPR75-ASB3      | GPR75-ASB3  | 2117.731758 | 1587.246153 |             |   |
| 1361.488426     | 1542.735619 |             |             |             |   |
| GRIN2D GRIN2D   | 1.041678189 | 2.641008574 | 11.15060136 |             |   |
| 5.884560532     |             |             |             |             |   |
| GRINA GRINA     | 170.8352229 | 581.9022225 | 341.2084017 |             |   |
| 298.151067      |             |             |             |             |   |
| U2SURP U2SURP   | 7690.710067 | 6834.049854 | 6759.494546 |             |   |
| 7006.550073     |             |             |             |             |   |
| PIH1D2 PIH1D2   | 114.5846008 | 92.4353001  | 101.4704724 |             |   |

|              |              |             |             |             |             |   |
|--------------|--------------|-------------|-------------|-------------|-------------|---|
| 92.19144833  |              |             |             |             |             |   |
| KCNG2        | KCNG2        | 0           | 1.760672383 | 0           | 2.942280266 |   |
| KCNE1L       | KCNE1L       | 11.45846008 | 10.5640343  |             | 23.41626286 |   |
| 6.865320621  |              |             |             |             |             |   |
| CCR10        | CCR10        | 48.95887487 | 81.8712658  |             | 33.45180409 |   |
| 32.36508293  |              |             |             |             |             |   |
| TSPAN12      | TSPAN12      | 4.166712755 | 3.521344766 |             | 2.230120273 |   |
| 7.846080709  |              |             |             |             |             |   |
| CD1D         | CD1D         | 0           | 8.803361914 | 0           | 0           |   |
| GJB5         | GJB5         | 0           | 0           | 12.2656615  | 0.980760089 |   |
| ACAD8        | ACAD8        | 2269.816773 | 1924.414914 |             | 2338.281106 |   |
| 2282.228726  |              |             |             |             |             |   |
| LOC440300    | LOC440300    |             | 9.375103698 |             | 37.85445623 |   |
| 13.38072164  | 31.38432284  |             |             |             |             |   |
| REREP3       | REREP3       | 19.79188559 | 3.521344766 |             | 33.45180409 |   |
| 12.74988115  |              |             |             |             |             |   |
| CRYBB2P1     | CRYBB2P1     |             | 1462.516177 |             | 1020.309646 |   |
| 1089.413753  | 1088.643698  |             |             |             |             |   |
| ASB1         | ASB1         | 1204.179986 | 1475.443457 |             | 1035.890867 |   |
| 1241.642272  |              |             |             |             |             |   |
| HYOU1        | HYOU1        | 3972.960612 | 8712.687287 |             | 4084.465279 |   |
| 3803.387624  |              |             |             |             |             |   |
| PHAX         | PHAX         | 4308.380988 | 3795.129321 |             | 5147.117589 |   |
| 4217.268381  |              |             |             |             |             |   |
| CLIP1-AS1    | CLIP1-AS1    | 0           | 1.760672383 | 0           |             |   |
| 4.903800443  |              |             |             |             |             |   |
| LOC100506388 | LOC100506388 |             | 2.083356377 | 0           | 0           | 0 |
| PARPBP       | PARPBP       | 3332.328526 | 2571.462015 |             | 1402.745651 |   |
| 1755.560559  |              |             |             |             |             |   |
| MIR610       | MIR610       | 0           | 3.521344766 | 1.115060136 | 0           |   |
| PVT1         | PVT1         | 1102.095524 | 573.0988606 |             | 1778.520917 |   |
| 1478.005454  |              |             |             |             |             |   |
| SNX8         | SNX8         | 1673.976849 | 1522.981611 |             | 851.9059441 |   |
| 1108.2589    |              |             |             |             |             |   |
| RAB39A       | RAB39A       | 3.125034566 | 7.923025723 | 0           | 1.961520177 |   |
| USP25        | USP25        | 3376.07901  | 2913.912794 |             | 5430.342864 |   |
| 4003.462682  |              |             |             |             |             |   |
| MIR4668      | MIR4668      | 2.083356377 | 3.521344766 |             | 1.115060136 |   |
| 4.903800443  |              |             |             |             |             |   |
| MIR4667      | MIR4667      | 1.041678189 | 1.760672383 | 0           | 0           |   |
| MIR4666A     | MIR4666A     | 0           | 7.042689532 | 0           | 0           | 0 |
| MIR4665      | MIR4665      | 30.20866747 | 33.45277527 |             | 27.87650341 |   |
| 18.63444168  |              |             |             |             |             |   |
| MIR4505      | MIR4505      | 4.166712755 | 5.282017149 |             | 5.575300681 | 0 |
| TMEM210      | TMEM210      | 0           | 0           | 3.345180409 | 0           |   |
| PDLIM1       | PDLIM1       | 63.54236951 | 710.4313065 |             | 63.55842777 |   |
| 127.4988115  |              |             |             |             |             |   |
| NFKBIA       | NFKBIA       | 28675.31718 | 21816.4915  |             | 29791.06166 |   |
| 30658.56037  |              |             |             |             |             |   |
| TCEAL3       | TCEAL3       | 19.79188559 | 61.6235334  |             | 119.3114346 |   |

|               |               |             |             |             |             |
|---------------|---------------|-------------|-------------|-------------|-------------|
| 155.9408541   |               |             |             |             |             |
| DDX5          | DDX5          | 69713.2711  | 51879.0921  | 73849.31776 |             |
| 73588.39097   |               |             |             |             |             |
| ITGAD         | ITGAD         | 0           | 1.760672383 | 3.345180409 | 0           |
| SCGB2B2       | SCGB2B2       | 0           | 3.521344766 | 0           | 2.942280266 |
| TSR2          | TSR2          | 5619.853828 | 3930.701095 | 5434.803104 |             |
| 4598.784056   |               |             |             |             |             |
| CCDC102A      | CCDC102A      |             | 920.8435188 | 887.378881  |             |
| 713.6384872   |               | 823.8384745 |             |             |             |
| UCN2          | UCN2          | 0           | 6.16235334  | 0           | 0           |
| TIGD7         | TIGD7         | 232.2942361 | 336.2884251 | 601.0174134 |             |
| 341.3045109   |               |             |             |             |             |
| LDHAL6B       | LDHAL6B       | 7.291747321 | 1.760672383 | 0           | 0           |
| BRCC3         | BRCC3         | 4309.422667 | 3719.420409 | 3463.376783 |             |
| 3944.617077   |               |             |             |             |             |
| TSNAXIP1      | TSNAXIP1      |             | 36.4587366  | 18.48706002 |             |
| 26.76144327   |               | 30.40356275 |             |             |             |
| IAH1          | IAH1          | 2939.615849 | 3543.353171 | 2397.379293 |             |
| 3151.182165   |               |             |             |             |             |
| PCTP          | PCTP          | 634.3820169 | 626.7993683 | 446.0240545 |             |
| 550.2064097   |               |             |             |             |             |
| LMBR1         | LMBR1         | 3542.74752  | 3053.005912 | 3257.090658 |             |
| 3593.504965   |               |             |             |             |             |
| GOLPH3        | GOLPH3        | 11690.75431 | 9595.664487 | 7926.962509 |             |
| 8234.461704   |               |             |             |             |             |
| PHF5A         | PHF5A         | 1734.394184 | 2000.123827 | 1801.93718  |             |
| 1152.393104   |               |             |             |             |             |
| DNAJB7        | DNAJB7        | 102.0844625 | 28.17075813 | 243.0831097 |             |
| 45.11496408   |               |             |             |             |             |
| DIRAS1        | DIRAS1        | 0           | 0           | 2.230120273 | 0           |
| FRAT2         | FRAT2         | 900.009955  | 853.9261057 | 903.1987104 |             |
| 874.8379991   |               |             |             |             |             |
| ELL2          | ELL2          | 7584.458892 | 8338.544405 | 5566.3802   |             |
| 5138.202105   |               |             |             |             |             |
| LOC100130093  | LOC100130093  |             | 1677.101884 | 1426.14463  |             |
| 1710.502249   |               | 1848.732767 |             |             |             |
| SLX1A-SULT1A3 | SLX1A-SULT1A3 |             | 75.00082959 | 95.95664487 |             |
| 113.7361339   |               | 84.34536763 |             |             |             |
| RNF215        | RNF215        | 38.54209298 | 39.61512861 | 17.84096218 |             |
| 44.13420399   |               |             |             |             |             |
| ALKBH4        | ALKBH4        | 870.8429658 | 653.209454  | 606.5927141 |             |
| 629.6479769   |               |             |             |             |             |
| RNPC3         | RNPC3         | 494.7971396 | 551.970792  | 700.2577656 |             |
| 638.4748177   |               |             |             |             |             |
| FAM187B       | FAM187B       | 0           | 0           | 3.345180409 | 0           |
| CLEC4F        | CLEC4F        | 3.125034566 | 14.08537906 | 0           | 0           |
| ZNF100        | ZNF100        | 1038.553154 | 1312.581261 | 1318.001081 |             |
| 1405.429207   |               |             |             |             |             |
| NOL8          | NOL8          | 4557.342076 | 3610.258721 | 3976.304446 |             |
| 4470.304484   |               |             |             |             |             |

|           |           |             |             |             |             |
|-----------|-----------|-------------|-------------|-------------|-------------|
| F2        | F2        | 7.291747321 | 5.282017149 | 0           | 3.923040355 |
| CRISPLD1  | CRISPLD1  | 23.41626286 | 14.58349464 | 81.8712658  |             |
| LOC400863 | LOC400863 | 114.851194  | 66.66740408 | 125.8880754 |             |
| SRR       | SRR       | 5093.08714  | 3514.302076 | 5636.628989 |             |
| BCORL1    | BCORL1    | 67.70908227 | 162.8621954 | 216.3216664 |             |
| ZNF653    | ZNF653    | 144.171733  | 234.1694269 | 122.656615  |             |
| FBX034    | FBX034    | 2494.819262 | 2345.215614 | 3204.682832 |             |
| LINC01248 | LINC01248 | 0.980760089 | 0           | 2.230120273 |             |
| TMEM165   | TMEM165   | 5926.733216 | 6474.872688 | 5699.072356 |             |
| MSI1      | MSI1      | 1.041678189 | 1.760672383 | 1.115060136 |             |
| AIRE      | AIRE      | 0.980760089 | 23.76907717 | 1.115060136 |             |
| ECM2      | ECM2      | 14.71140133 | 18.48706002 | 11.15060136 |             |
| FASLG     | FASLG     | 2275.363406 | 3059.168265 | 1359.258306 |             |
| AKR7A3    | AKR7A3    | 8.826840798 | 0.880336191 | 34.56686422 |             |
| MATN1     | MATN1     | 78.46080709 | 8.803361914 | 89.2048109  |             |
| BCR       | BCR       | 2779.474091 | 2933.28019  | 2127.53474  |             |
| FAM161A   | FAM161A   | 272.6513047 | 244.7334612 | 243.0831097 |             |
| C9orf40   | C9orf40   | 1289.699517 | 1678.801117 | 1199.804707 |             |
| AMFR      | AMFR      | 4010.328003 | 3928.060086 | 5250.818182 |             |
| PFDN4     | PFDN4     | 1509.389776 | 2334.65158  | 1573.349852 |             |
| MMP15     | MMP15     | 6.865320621 | 17.60672383 | 4.460240545 |             |
| SLC5A11   | SLC5A11   | 11.76912106 | 0.880336191 | 5.575300681 |             |
| LONRF2    | LONRF2    | 16.67292151 | 14.08537906 | 52.4078264  |             |
| PCSK5     | PCSK5     | 202.0365783 | 136.4521097 | 477.2457383 |             |
| CAPZA2    | CAPZA2    | 11603.37261 | 10443.42824 | 12374.93739 |             |
| PTCD1     | PTCD1     | 6604.239716 | 4879.703509 | 5212.906137 |             |



|             |          |             |             |             |             |
|-------------|----------|-------------|-------------|-------------|-------------|
| 5183.317069 |          |             |             |             |             |
| AZIN2       | AZIN2    | 65.62572589 | 54.58084387 | 92.54999131 |             |
| 107.8836098 |          |             |             |             |             |
| ESC01       | ESC01    | 1014.594556 | 1152.360075 | 1552.16371  |             |
| 1499.582176 |          |             |             |             |             |
| MRPL45P2    | MRPL45P2 |             | 190.6271085 | 113.5633687 |             |
| 172.8343211 |          | 139.2679326 |             |             |             |
| MIR3177     | MIR3177  | 2.083356377 | 2.641008574 | 0           | 0           |
| CBWD3       | CBWD3    | 167.7101884 | 128.529084  | 189.5602232 |             |
| 187.3251769 |          |             |             |             |             |
| ATP6V1G1    | ATP6V1G1 |             | 6226.110534 | 4980.942171 |             |
| 7448.60171  |          | 4741.975029 |             |             |             |
| CDC23       | CDC23    | 7228.204951 | 5480.973128 | 5226.286859 |             |
| 6129.750554 |          |             |             |             |             |
| LHFPL2      | LHFPL2   | 6.250069132 | 17.60672383 | 18.95602232 |             |
| 22.55748204 |          |             |             |             |             |
| MMP21       | MMP21    | 3.125034566 | 2.641008574 | 0           | 2.942280266 |
| PPP3R2      | PPP3R2   | 0           | 5.575300681 | 1.961520177 |             |
| PCDHB13     | PCDHB13  | 0           | 0           | 1.961520177 |             |
| DEPTOR      | DEPTOR   | 17.70852921 | 23.76907717 | 24.531323   |             |
| 75.51852683 |          |             |             |             |             |
| STMND1      | STMND1   | 343.7538023 | 13.20504287 | 97.01023186 | 0           |
| BTN1A1      | BTN1A1   | 0           | 41.25722504 | 0.980760089 |             |
| MAP2K3      | MAP2K3   | 12660.55671 | 11739.28311 | 9223.777447 |             |
| 13305.97212 |          |             |             |             |             |
| CA4         | CA4      | 1.041678189 | 0           | 0           | 0           |
| CSF2RB      | CSF2RB   | 4061.503258 | 1932.33794  | 1949.125118 |             |
| 887.5878802 |          |             |             |             |             |
| MAP4K2      | MAP4K2   | 5196.932483 | 4600.636936 | 3349.640649 |             |
| 4335.940352 |          |             |             |             |             |
| ILVBL       | ILVBL    | 2995.866471 | 2734.324211 | 2353.891948 |             |
| 2942.280266 |          |             |             |             |             |
| TMEM59      | TMEM59   | 11543.87769 | 10404.69345 | 12722.83615 |             |
| 9689.909676 |          |             |             |             |             |
| TCF15       | TCF15    | 2.083356377 | 0           | 3.345180409 | 8.826840798 |
| TMEM234     | TMEM234  | 355.2122623 | 261.4598489 | 309.9867179 |             |
| 311.8817082 |          |             |             |             |             |
| GPR143      | GPR143   | 5.208390943 | 7.923025723 | 4.460240545 |             |
| 8.826840798 |          |             |             |             |             |
| ALDH9A1     | ALDH9A1  | 5659.437599 | 4769.661485 | 3977.419506 |             |
| 5198.02847  |          |             |             |             |             |
| ANXA6       | ANXA6    | 12208.46837 | 20977.53111 | 8597.113651 |             |
| 10249.92369 |          |             |             |             |             |
| AKR1C1      | AKR1C1   | 1.041678189 | 4.401680957 | 39.02710477 |             |
| 1.961520177 |          |             |             |             |             |
| KIAA1109    | KIAA1109 |             | 823.9674473 | 1297.615546 |             |
| 1614.607077 |          | 1009.202131 |             |             |             |
| TMEM243     | TMEM243  | 3436.496345 | 3286.295003 | 2595.859997 |             |
| 2783.397132 |          |             |             |             |             |
| NOL12       | NOL12    | 3121.909532 | 2237.814599 | 2511.115427 |             |

|             |             |             |               |             |
|-------------|-------------|-------------|---------------|-------------|
| 2037.038704 |             |             |               |             |
| PLEKHF1     | PLEKHF1     | 3401.079286 | 2545.051929   | 1752.874534 |
| 1868.347969 |             |             |               |             |
| SCD         | SCD         | 2444.818709 | 11696.14664   | 2205.58895  |
| 9775.235804 |             |             |               |             |
| DLEC1       | DLEC1       | 353.128906  | 266.741866    | 250.8885307 |
| 292.2665064 |             |             |               |             |
| PLK1        | PLK1        | 18661.66475 | 14368.84732   | 6825.283094 |
| 8542.420372 |             |             |               |             |
| TLR2        | TLR2        | 98.95942793 | 25.52974955   | 205.1710651 |
| 167.7099752 |             |             |               |             |
| SNRPA1      | SNRPA1      | 8671.970921 | 7067.338945   | 7252.351126 |
| 7159.548647 |             |             |               |             |
| SNX2        | SNX2        | 5518.811044 | 3640.190152   | 5529.583216 |
| 4161.365056 |             |             |               |             |
| FSCN1       | FSCN1       | 61.45901313 | 442.8091043   | 265.3843124 |
| 197.1327778 |             |             |               |             |
| CCL18       | CCL18       | 5.208390943 | 0.880336191   | 0 0         |
| ZSWIM4      | ZSWIM4      | 42.70880574 | 320.4423737   | 75.82408927 |
| 98.07600887 |             |             |               |             |
| ATP6AP1L    | ATP6AP1L    |             | 61.45901313   | 53.70050768 |
| 54.63794668 | 90.22992816 |             |               |             |
| TMEM252     | TMEM252     | 0 0         | 0 1.961520177 |             |
| CPNE8       | CPNE8       | 137.5015209 | 230.6480822   | 360.164424  |
| 231.4593809 |             |             |               |             |
| DDX42       | DDX42       | 954.1772208 | 2321.446537   | 1646.943821 |
| 1325.98764  |             |             |               |             |
| TMEM65      | TMEM65      | 366.6707224 | 290.5109432   | 229.7023881 |
| 285.4011858 |             |             |               |             |
| PRICKLE4    | PRICKLE4    |             | 44.79216211   | 44.01680957 |
| 94.78011158 | 64.73016585 |             |               |             |
| LCP2        | LCP2        | 12516.80512 | 10686.40103   | 11467.27844 |
| 11010.01276 |             |             |               |             |
| RABL2A      | RABL2A      | 221.8774542 | 171.6655573   | 392.501168  |
| 391.3232754 |             |             |               |             |
| OGFOD3      | OGFOD3      | 1330.223047 | 1606.613549   | 1523.172146 |
| 1661.40759  |             |             |               |             |
| RBM22       | RBM22       | 5861.523168 | 4910.515276   | 6091.573524 |
| 5118.586903 |             |             |               |             |
| TMEM9B-AS1  | TMEM9B-AS1  |             | 22.91692015   | 62.50386959 |
| 100.3554123 | 125.5372913 |             |               |             |
| KBTBD7      | KBTBD7      | 912.5100933 | 784.3795466   | 923.2697928 |
| 793.4349117 |             |             |               |             |
| TMEM260     | TMEM260     | 585.423142  | 635.6027302   | 747.0902913 |
| 760.0890687 |             |             |               |             |
| OTOGL       | OTOGL       | 1.041678189 | 2.641008574   | 0 0         |
| NINL        | NINL        | 78.12586415 | 161.9818592   | 113.7361339 |
| 106.9028497 |             |             |               |             |
| NIPBL       | NIPBL       | 1833.353612 | 2753.691607   | 3903.825537 |
| 2788.300932 |             |             |               |             |

|              |              |             |             |             |             |
|--------------|--------------|-------------|-------------|-------------|-------------|
| PRX          | PRX          | 10.41678189 | 15.84605145 | 18.95602232 |             |
| 33.34584301  |              |             |             |             |             |
| HOXB4        | HOXB4        | 17.70852921 | 138.2127821 | 1.115060136 |             |
| 12.74988115  |              |             |             |             |             |
| ZNF280C      | ZNF280C      | 1135.429226 | 888.2592172 | 705.8330663 |             |
| 814.0308736  |              |             |             |             |             |
| STARD6       | STARD6       | 19.79188559 | 6.16235334  | 3.345180409 |             |
| 1.961520177  |              |             |             |             |             |
| TRUB1        | TRUB1        | 3601.081498 | 2008.046853 | 1593.420935 |             |
| 1643.753909  |              |             |             |             |             |
| PA2G4        | PA2G4        | 31869.10251 | 22857.92921 | 24957.27597 |             |
| 25551.74259  |              |             |             |             |             |
| ZNF519       | ZNF519       | 335.4203768 | 418.1596909 | 364.6246646 |             |
| 311.8817082  |              |             |             |             |             |
| LOC101928372 | LOC101928372 | 0           | 0           | 0           | 1.961520177 |
| DRAM2        | DRAM2        | 2090.648125 | 1903.286846 | 2193.323288 |             |
| 1992.9045    |              |             |             |             |             |
| GSX2         | GSX2         | 0           | 0           | 0           | 1.961520177 |
| GOLGA8N      | GOLGA8N      | 11.45846008 | 4.401680957 | 27.87650341 |             |
| 6.865320621  |              |             |             |             |             |
| GOLGA8K      | GOLGA8K      | 0           | 1.760672383 | 0           | 0.980760089 |
| C6orf229     | C6orf229     | 6.250069132 | 6.16235334  | 6.16235334  |             |
| 10.03554123  | 3.923040355  |             |             |             |             |
| PCDHB14      | PCDHB14      | 0           | 0           | 3.923040355 |             |
| EAF2         | EAF2         | 1816.686761 | 1495.691189 | 830.7198015 |             |
| 609.0520151  |              |             |             |             |             |
| WDR19        | WDR19        | 508.3389561 | 372.382209  | 425.9529721 |             |
| 480.5724434  |              |             |             |             |             |
| ZSCAN16      | ZSCAN16      | 563.5479001 | 519.3983529 | 723.6740284 |             |
| 560.0140106  |              |             |             |             |             |
| TGFB1        | TGFB1        | 1611.476158 | 3304.782063 | 1819.778142 |             |
| 1521.158898  |              |             |             |             |             |
| USP6         | USP6         | 30.20866747 | 22.88874098 | 49.062646   |             |
| 40.21116364  |              |             |             |             |             |
| BYSL         | BYSL         | 3433.37131  | 2447.334612 | 3169.000907 |             |
| 3198.258649  |              |             |             |             |             |
| BNIP3        | BNIP3        | 956.2605772 | 1658.553385 | 2150.951003 |             |
| 4587.995695  |              |             |             |             |             |
| GPR37L1      | GPR37L1      | 2.083356377 | 0.880336191 | 0           | 0           |
| TMEM45A      | TMEM45A      | 8.33342551  | 7.923025723 | 0           | 18.63444168 |
| KIR2DL1      | KIR2DL1      | 0           | 0.880336191 | 0           | 0           |
| ZBTB25       | ZBTB25       | 630.2153042 | 822.2340028 | 1131.786038 |             |
| 862.0881179  |              |             |             |             |             |
| SERPINB3     | SERPINB3     | 0           | 3.521344766 | 0           | 0           |
| FBX030       | FBX030       | 2141.690356 | 1473.682784 | 1083.838452 |             |
| 1306.372438  |              |             |             |             |             |
| IDH3B        | IDH3B        | 9974.068657 | 6775.947665 | 8164.470318 |             |
| 7159.548647  |              |             |             |             |             |
| RASGRF2      | RASGRF2      | 427.0880574 | 676.098195  | 845.2155833 |             |
| 886.6071202  |              |             |             |             |             |

|             |           |             |             |             |             |
|-------------|-----------|-------------|-------------|-------------|-------------|
| DSEL        | DSEL      | 4.166712755 | 4.401680957 | 101.4704724 |             |
| 5.884560532 |           |             |             |             |             |
| ASTN2-AS1   | ASTN2-AS1 |             | 1.041678189 | 1.760672383 | 0           |
| 0           |           |             |             |             |             |
| MIR1306     | MIR1306   | 107.2928534 | 93.31563629 | 99.24035213 |             |
| 55.90332505 |           |             |             |             |             |
| CIAPIN1     | CIAPIN1   | 7900.087383 | 5252.966054 | 5650.00971  |             |
| 5013.645573 |           |             |             |             |             |
| CHMP4A      | CHMP4A    | 8362.592499 | 6414.129491 | 5837.339813 |             |
| 6431.824661 |           |             |             |             |             |
| FCRL6       | FCRL6     | 3.125034566 | 20.2477324  | 0           | 0           |
| RND2        | RND2      | 7.291747321 | 5.282017149 | 20.07108245 |             |
| 19.61520177 |           |             |             |             |             |
| SNHG8       | SNHG8     | 847.9260456 | 936.6777077 | 1477.454681 |             |
| 1109.23966  |           |             |             |             |             |
| PTPN1       | PTPN1     | 4814.636588 | 4760.858123 | 6877.69092  |             |
| 8604.208258 |           |             |             |             |             |
| FOX03B      | FOX03B    | 195.8354995 | 211.2806859 | 482.821039  |             |
| 257.9399033 |           |             |             |             |             |
| LAMTOR3     | LAMTOR3   | 2702.113221 | 2388.352087 | 3890.444815 |             |
| 2743.185968 |           |             |             |             |             |
| HNRNPH1     | HNRNPH1   | 9733.440995 | 16430.59468 | 10947.66042 |             |
| 12918.57189 |           |             |             |             |             |
| STK4        | STK4      | 14044.94702 | 13698.03114 | 19065.29821 |             |
| 17117.20583 |           |             |             |             |             |
| DAPP1       | DAPP1     | 5969.857699 | 5240.641348 | 4162.519489 |             |
| 4892.031322 |           |             |             |             |             |
| ZNF770      | ZNF770    | 2442.735353 | 2304.720149 | 4057.703836 |             |
| 3398.333707 |           |             |             |             |             |
| LSM4        | LSM4      | 12356.38667 | 8685.396865 | 8647.291357 |             |
| 9323.105403 |           |             |             |             |             |
| PIH1D1      | PIH1D1    | 4463.591039 | 3888.444958 | 2822.217205 |             |
| 3529.755559 |           |             |             |             |             |
| FAM98C      | FAM98C    | 580.2147511 | 405.8349843 | 511.8126025 |             |
| 501.1684053 |           |             |             |             |             |
| RNF151      | RNF151    | 1.041678189 | 1.760672383 | 3.345180409 |             |
| 0.980760089 |           |             |             |             |             |
| MIR1322     | MIR1322   | 0           | 1.760672383 | 4.460240545 | 0           |
| FAXC        | FAXC      | 22.91692015 | 208.6396774 | 12.2656615  |             |
| 59.82636541 |           |             |             |             |             |
| SLC25A18    | SLC25A18  |             | 8.33342551  | 8.803361914 |             |
| 3.345180409 |           |             |             |             |             |
| PADI2       | PADI2     | 25.00027653 | 35.21344766 | 0           | 14.71140133 |
| PRDM13      | PRDM13    | 1.041678189 | 10.5640343  | 6.690360818 |             |
| 2.942280266 |           |             |             |             |             |
| SCPEP1      | SCPEP1    | 2775.030695 | 1656.792712 | 1844.309465 |             |
| 1401.506167 |           |             |             |             |             |
| TMEM241     | TMEM241   | 805.2172399 | 601.2696188 | 630.008977  |             |
| 747.3391876 |           |             |             |             |             |
| LOXL4       | LOXL4     | 2.083356377 | 3.521344766 | 0           | 1.961520177 |

|              |              |               |               |             |
|--------------|--------------|---------------|---------------|-------------|
| HECA         | HECA         | 584.3814639   | 1074.010154   | 1158.547482 |
| 964.0871672  |              |               |               |             |
| COL12A1      | COL12A1      | 0 0           | 0 0.980760089 |             |
| GPR65        | GPR65        | 1780.228024   | 2159.464678   | 2159.871484 |
| 2483.284545  |              |               |               |             |
| SLFN5        | SLFN5        | 9681.357086   | 4883.224854   | 13879.15352 |
| 4536.01541   |              |               |               |             |
| SWAP70       | SWAP70       | 711.4662029   | 799.3452618   | 1222.105909 |
| 803.2425126  |              |               |               |             |
| TRIM62       | TRIM62       | 363.5456879   | 489.4669224   | 626.6637966 |
| 508.0337259  |              |               |               |             |
| NUS1         | NUS1         | 2054.189388   | 2376.027381   | 2281.413039 |
| 1754.579799  |              |               |               |             |
| TMEM199      | TMEM199      | 3744.833088   | 2512.47949    | 3526.935211 |
| 2675.513522  |              |               |               |             |
| LAMA5        | LAMA5        | 7.291747321   | 38.73479242   | 2.230120273 |
| 5.884560532  |              |               |               |             |
| TXNL4A       | TXNL4A       | 6364.653733   | 6487.197395   | 5072.40856  |
| 5433.410891  |              |               |               |             |
| SLC4A1       | SLC4A1       | 0 0.880336191 | 0 0           |             |
| SLC3A1       | SLC3A1       | 245.8360525   | 352.1344766   | 414.8023707 |
| 534.5142483  |              |               |               |             |
| ABCD2        | ABCD2        | 494.7971396   | 2512.47949    | 1008.014363 |
| 1709.464835  |              |               |               |             |
| PIDD1        | PIDD1        | 2437.526962   | 2133.054592   | 1274.513736 |
| 1586.869823  |              |               |               |             |
| NME9         | NME9         | 10.41678189   | 30.8117667    | 22.30120273 |
| 19.61520177  |              |               |               |             |
| C1GALT1      | C1GALT1      | 3656.290442   | 4421.048353   | 3228.099094 |
| 3259.065775  |              |               |               |             |
| CNN3         | CNN3         | 115.6262789   | 192.7936259   | 1074.917971 |
| 462.9187619  |              |               |               |             |
| DKFZP434A062 | DKFZP434A062 |               | 0 0 0         | 0.980760089 |
| FAM182B      | FAM182B      | 0 0           | 0 0.980760089 |             |
| SPRTN        | SPRTN        | 1523.97519    | 1397.973872   | 1228.79627  |
| 1123.951062  |              |               |               |             |
| ANGPTL6      | ANGPTL6      | 1492.724844   | 1218.385289   | 2089.622695 |
| 1740.849157  |              |               |               |             |
| LOC730101    | LOC730101    |               | 194.7938213   | 76.58924866 |
| 103.7005927  | 36.28812328  |               |               |             |
| VTRNA1-3     | VTRNA1-3     |               | 48.95887487   | 52.82017149 |
| 84.74457036  | 36.28812328  |               |               |             |
| TTC30A       | TTC30A       | 98.95942793   | 113.5633687   | 141.6126373 |
| 128.4795716  |              |               |               |             |
| CHMP7        | CHMP7        | 7424.040451   | 7240.765175   | 8204.612483 |
| 6905.531784  |              |               |               |             |
| OR7D2        | OR7D2        | 3.125034566   | 0 0           | 0           |
| GNG5         | GNG5         | 10564.70019   | 13578.30542   | 9290.681055 |
| 9383.912528  |              |               |               |             |
| GNB2         | GNB2         | 1860.437245   | 4190.400271   | 1665.899844 |

|             |           |             |             |             |             |
|-------------|-----------|-------------|-------------|-------------|-------------|
| 1579.023743 |           |             |             |             |             |
| CXCL14      | CXCL14    | 0           | 0           | 0           | 5.884560532 |
| PTPRG       | PTPRG     | 43.75048393 |             | 32.57243908 | 33.45180409 |
| 21.57672195 |           |             |             |             |             |
| TSPYL4      | TSPYL4    | 688.5492827 |             | 794.0632447 | 836.2951022 |
| 516.8605667 |           |             |             |             |             |
| UTP14C      | UTP14C    | 1504.183304 |             | 1488.6485   | 1883.33657  |
| 1492.716855 |           |             |             |             |             |
| SNORD95     | SNORD95   | 17.70852921 |             | 8.803361914 | 16.72590204 |
| 16.67292151 |           |             |             |             |             |
| SNORA41     | SNORA41   | 27.08363291 |             | 8.803361914 | 7.805420954 |
| 30.40356275 |           |             |             |             |             |
| AQPEP       | AQPEP     | 0           | 0           | 6.690360818 | 0           |
| CRYZL1      | CRYZL1    | 1779.186346 |             | 1345.153701 | 1817.548022 |
| 1588.831344 |           |             |             |             |             |
| SKOR1       | SKOR1     | 0           | 0.880336191 | 0           | 0           |
| PATE2       | PATE2     | 1.041678189 |             | 2.641008574 | 0           |
| 0           |           |             |             |             | 0           |
| METTL10     | METTL10   | 1426.05744  |             | 1489.528836 | 1197.574586 |
| 1430.928969 |           |             |             |             |             |
| B4GALT4     | B4GALT4   | 1098.970489 |             | 673.4571864 | 1759.564895 |
| 1399.544647 |           |             |             |             |             |
| KLHL9       | KLHL9     | 1526.058546 |             | 1248.316719 | 2711.826251 |
| 2480.342264 |           |             |             |             |             |
| DNASE2      | DNASE2    | 3067.742266 |             | 2811.793795 | 3068.645495 |
| 2681.398082 |           |             |             |             |             |
| LOC646862   | LOC646862 |             | 0           | 0           | 0           |
| GAREM       | GAREM     | 4.166712755 |             | 11.44437049 | 4.460240545 |
| 4.903800443 |           |             |             |             |             |
| RPS6KA5     | RPS6KA5   | 5486.51902  |             | 3030.997507 | 4066.624317 |
| 2562.726112 |           |             |             |             |             |
| TOMM7       | TOMM7     | 3772.958399 |             | 3557.43855  | 5014.425433 |
| 3233.566012 |           |             |             |             |             |
| GNMT        | GNMT      | 6.250069132 |             | 13.20504287 | 5.575300681 |
| 30.40356275 |           |             |             |             |             |
| OR1F1       | OR1F1     | 2.083356377 |             | 0.880336191 | 1.115060136 |
| 2.942280266 |           |             |             |             |             |
| KLHL24      | KLHL24    | 637.5070515 |             | 910.2676219 | 3729.876156 |
| 2022.327303 |           |             |             |             |             |
| MIR32       | MIR32     | 0           | 1.760672383 | 6.690360818 | 0           |
| MIR24-1     | MIR24-1   | 0           | 1.760672383 | 1.115060136 | 0.980760089 |
| MIR221      | MIR221    | 0           | 3.521344766 | 7.805420954 | 1.961520177 |
| OGFRP1      | OGFRP1    | 42.70880574 |             | 28.17075813 | 39.02710477 |
| 83.36460754 |           |             |             |             |             |
| PPIAP30     | PPIAP30   | 1.041678189 |             | 7.923025723 | 31.22168382 |
| 3.923040355 |           |             |             |             |             |
| FGF14       | FGF14     | 0           | 0           | 3.345180409 | 2.942280266 |
| CTSW        | CTSW      | 725.0080193 |             | 1261.521762 | 895.3932894 |
| 1790.867922 |           |             |             |             |             |
| DVL2        | DVL2      | 1960.438351 |             | 2256.301659 | 2879.085272 |
| 2811.839174 |           |             |             |             |             |

|             |           |             |             |             |             |
|-------------|-----------|-------------|-------------|-------------|-------------|
| DVL1        | DVL1      | 201.0438904 | 304.5963222 | 252.0035908 |             |
| 323.6508293 |           |             |             |             |             |
| DUSP1       | DUSP1     | 870.8429658 | 712.1919789 | 1813.087782 |             |
| 1356.391203 |           |             |             |             |             |
| MIR1304     | MIR1304   | 6.250069132 | 15.84605145 | 6.690360818 |             |
| 4.903800443 |           |             |             |             |             |
| MPHOSPH9    | MPHOSPH9  |             | 4037.544659 | 4414.886    |             |
| 2788.765401 |           | 3412.064348 |             |             |             |
| REEP3       | REEP3     | 2096.898194 | 3585.609308 | 1617.952258 |             |
| 1770.27196  |           |             |             |             |             |
| TRNP1       | TRNP1     | 7.291747321 | 6.16235334  | 8.92048109  |             |
| 2.942280266 |           |             |             |             |             |
| FAM95C      | FAM95C    | 0           | 0           | 3.923040355 |             |
| CCDC144NL   | CCDC144NL | 0           | 0           | 0.880336191 | 3.345180409 |
| 7.846080709 |           |             |             |             |             |
| C17orf97    | C17orf97  |             | 13.54181645 | 22.88874098 |             |
| 16.72590204 |           | 4.903800443 |             |             |             |
| H2BFM       | H2BFM     | 0           | 0           | 1.115060136 | 0           |
| ALOX12      | ALOX12    | 101.0427843 | 153.1784973 | 172.8343211 |             |
| 164.7676949 |           |             |             |             |             |
| NMNAT3      | NMNAT3    | 28.12531109 | 93.31563629 | 126.0017954 |             |
| 182.4213765 |           |             |             |             |             |
| TRIM34      | TRIM34    | 839.5926201 | 707.7902979 | 877.5523272 |             |
| 827.7615148 |           |             |             |             |             |
| SCYL1       | SCYL1     | 4134.420731 | 4075.956566 | 4188.165872 |             |
| 4159.403536 |           |             |             |             |             |
| RD3         | RD3       | 3.125034566 | 0           | 0           | 0           |
| CCDC61      | CCDC61    | 581.2564293 | 603.0302911 | 470.5553775 |             |
| 685.551302  |           |             |             |             |             |
| LCLAT1      | LCLAT1    | 1673.976849 | 2252.780314 | 1659.209483 |             |
| 1718.291675 |           |             |             |             |             |
| MIR10A      | MIR10A    | 0           | 0.880336191 | 0           | 0           |
| MIR7-1      | MIR7-1    | 5.208390943 | 6.16235334  | 11.15060136 |             |
| 10.78836098 |           |             |             |             |             |
| MIR199A1    | MIR199A1  |             | 1.041678189 | 2.641008574 | 0           |
| 1.961520177 |           |             |             |             |             |
| MIR26A1     | MIR26A1   | 1.041678189 | 1.760672383 | 0           | 0.980760089 |
| MIR92A1     | MIR92A1   | 2.083356377 | 0           | 0           | 2.942280266 |
| MIR22       | MIR22     | 44.79216211 | 18.48706002 | 57.98312709 |             |
| 29.42280266 |           |             |             |             |             |
| MIR29A      | MIR29A    | 0           | 3.521344766 | 3.345180409 | 0.980760089 |
| MIR20A      | MIR20A    | 2.083356377 | 1.760672383 | 0           | 0           |
| MIR19A      | MIR19A    | 0           | 1.760672383 | 0           | 0           |
| CBWD5       | CBWD5     | 770.8418596 | 596.8679378 | 889.8179887 |             |
| 690.4551024 |           |             |             |             |             |
| MAP3K11     | MAP3K11   | 1316.681231 | 3083.817679 | 1442.887816 |             |
| 1652.580749 |           |             |             |             |             |
| SELT        | SELT      | 24015.89064 | 18958.92022 | 17336.955   |             |
| 15806.91035 |           |             |             |             |             |
| TOB2        | TOB2      | 1790.644806 | 3116.390118 | 2257.996776 |             |

|             |           |             |             |             |             |
|-------------|-----------|-------------|-------------|-------------|-------------|
| 2432.28502  |           |             |             |             |             |
| KLF2        | KLF2      | 3620.873384 | 5262.649752 | 1260.017954 |             |
| 858.1650776 |           |             |             |             |             |
| DOC2B       | DOC2B     | 5.208390943 | 13.20504287 | 12.2656615  | 0           |
| STAG3L4     | STAG3L4   | 393.7543553 | 565.1758349 | 575.3710303 |             |
| 583.5522528 |           |             |             |             |             |
| NOP58       | NOP58     | 14056.40548 | 10380.92437 | 12326.98981 |             |
| 13060.7821  |           |             |             |             |             |
| PTGDS       | PTGDS     | 0           | 2.641008574 | 0           |             |
| RPS6KA1     | RPS6KA1   | 18577.28882 | 12852.9084  | 10483.7954  |             |
| 14034.67687 |           |             |             |             |             |
| RPS2        | RPS2      | 51403.69358 | 45909.53238 | 51494.59215 |             |
| 49841.24695 |           |             |             |             |             |
| MTPN        | MTPN      | 4079.211787 | 7482.857627 | 4470.276086 |             |
| 4402.632038 |           |             |             |             |             |
| ZNF511      | ZNF511    | 3241.702523 | 2388.352087 | 2346.086527 |             |
| 2719.647726 |           |             |             |             |             |
| TSPAN16     | TSPAN16   | 0           | 0           | 5.575300681 | 0           |
| GLDC        | GLDC      | 351.0455496 | 733.3200475 | 158.3385393 |             |
| 592.3790936 |           |             |             |             |             |
| MRPL17      | MRPL17    | 3336.495238 | 2986.100361 | 3724.300855 |             |
| 3598.408765 |           |             |             |             |             |
| GCN1L1      | GCN1L1    | 5129.223401 | 13345.01633 | 8531.325103 |             |
| 8681.688305 |           |             |             |             |             |
| PCNX        | PCNX      | 1055.220005 | 2182.353419 | 1646.943821 |             |
| 1508.409016 |           |             |             |             |             |
| CLPTM1L     | CLPTM1L   | 11174.08193 | 8868.506793 | 7308.104133 |             |
| 7572.448645 |           |             |             |             |             |
| TG          | TG        | 26.04195472 | 95.07630868 | 62.44336763 |             |
| 57.86484523 |           |             |             |             |             |
| HOXD1       | HOXD1     | 6.250069132 | 1.760672383 | 3.345180409 |             |
| 10.78836098 |           |             |             |             |             |
| PURA        | PURA      | 569.7979692 | 1155.881419 | 1011.359544 |             |
| 689.4743423 |           |             |             |             |             |
| TMC02       | TMC02     | 0           | 0           | 0.980760089 |             |
| SLC25A47    | SLC25A47  |             | 0           | 0           | 4.460240545 |
| 3.923040355 |           |             |             |             |             |
| ADPGK       | ADPGK     | 6713.615926 | 4818.079976 | 6563.243962 |             |
| 5936.540817 |           |             |             |             |             |
| LINC01490   | LINC01490 |             | 0           | 0           | 0           |
|             |           |             |             |             | 1.961520177 |
| FRMPD1      | FRMPD1    | 0           | 0           | 22.30120273 | 0.980760089 |
| SPDL1       | SPDL1     | 4484.424602 | 3860.274199 | 2517.805788 |             |
| 2859.896419 |           |             |             |             |             |
| RNF43       | RNF43     | 106.2511752 | 196.3149707 | 97.01023186 |             |
| 174.5752958 |           |             |             |             |             |
| OR2L2       | OR2L2     | 0           | 0.880336191 | 0           | 0           |
| ZNF676      | ZNF676    | 0           | 0           | 0           | 0.980760089 |
| LRRC45      | LRRC45    | 764.5917905 | 1275.607141 | 468.3252572 |             |
| 722.8201853 |           |             |             |             |             |
| MIR4469     | MIR4469   | 11.45846008 | 7.923025723 | 8.92048109  |             |



|              |              |             |             |             |             |   |
|--------------|--------------|-------------|-------------|-------------|-------------|---|
| 15.69216142  |              |             |             |             |             |   |
| MIR4467      | MIR4467      | 0           | 3.521344766 | 0           | 0.980760089 |   |
| CELF2-AS2    | CELF2-AS2    |             | 0           | 2.641008574 | 0           | 0 |
| KAT2B        | KAT2B        | 5124.01501  |             | 2070.550722 | 1701.581768 |   |
| 1492.716855  |              |             |             |             |             |   |
| DDX25        | DDX25        | 0           | 0           | 7.805420954 | 1.961520177 |   |
| MIR31HG      | MIR31HG      | 0           | 0           | 28.99156354 | 13.73064124 |   |
| MIR629       | MIR629       | 0           | 1.760672383 | 1.115060136 | 0           |   |
| DUSP16       | DUSP16       | 1710.435586 |             | 2655.97429  | 933.3053341 |   |
| 1662.38835   |              |             |             |             |             |   |
| PPM1E        | PPM1E        | 53.12558762 |             | 50.17916291 | 21.18614259 |   |
| 21.57672195  |              |             |             |             |             |   |
| TMEM253      | TMEM253      | 14.58349464 |             | 11.44437049 | 5.575300681 |   |
| 9.807600887  |              |             |             |             |             |   |
| SHH          | SHH          | 0           | 0.880336191 | 0           | 0           |   |
| ICAM1        | ICAM1        | 7286.53893  |             | 5014.394946 | 8719.770266 |   |
| 7159.548647  |              |             |             |             |             |   |
| ERCC6        | ERCC6        | 873.9680003 |             | 822.2340028 | 1262.248074 |   |
| 920.9337233  |              |             |             |             |             |   |
| ERCC5        | ERCC5        | 3387.53747  |             | 3494.93468  | 4346.504411 |   |
| 3824.964346  |              |             |             |             |             |   |
| FOSL2        | FOSL2        | 1589.600916 |             | 1906.808191 | 1451.808297 |   |
| 2644.129199  |              |             |             |             |             |   |
| C9orf69      | C9orf69      | 3282.327973 |             | 3251.961891 | 2899.156354 |   |
| 3201.200929  |              |             |             |             |             |   |
| LOC100131303 | LOC100131303 |             | 0           | 1.760672383 | 6.690360818 |   |
| 0            |              |             |             |             |             |   |
| MEGF8        | MEGF8        | 65.62572589 |             | 215.6823669 | 154.9933589 |   |
| 153.9793339  |              |             |             |             |             |   |
| YWHAH        | YWHAH        | 22485.66538 |             | 15088.08199 | 12657.04761 |   |
| 12786.16928  |              |             |             |             |             |   |
| TPGS1        | TPGS1        | 504.1722433 |             | 492.107931  | 534.1138053 |   |
| 512.9375264  |              |             |             |             |             |   |
| VWCE         | VWCE         | 108.3345316 |             | 113.5633687 | 111.5060136 |   |
| 111.8066501  |              |             |             |             |             |   |
| PATL1        | PATL1        | 728.1330539 |             | 1952.585673 | 625.5487364 |   |
| 794.4156718  |              |             |             |             |             |   |
| SLC25A41     | SLC25A41     |             | 4.166712755 | 0           | 0           |   |
| 2.942280266  |              |             |             |             |             |   |
| TMPRSS9      | TMPRSS9      | 38.54209298 |             | 34.33311147 | 49.062646   |   |
| 58.84560532  |              |             |             |             |             |   |
| F3           | F3           | 4.166712755 |             | 9.683698106 | 2.230120273 | 0 |
| PITPNC1      | PITPNC1      | 885.4264604 |             | 2214.045521 | 2339.396166 |   |
| 3773.964821  |              |             |             |             |             |   |
| RAD54B       | RAD54B       | 1848.978785 |             | 1823.176252 | 1672.590204 |   |
| 1481.928494  |              |             |             |             |             |   |
| ZNF658       | ZNF658       | 67.70908227 |             | 41.375801   | 43.48734531 |   |
| 154.960094   |              |             |             |             |             |   |
| FAM134C      | FAM134C      | 6006.316436 |             | 6288.241415 | 6942.364408 |   |
| 6256.268606  |              |             |             |             |             |   |

|             |             |             |             |             |
|-------------|-------------|-------------|-------------|-------------|
| SESTD1      | SESTD1      | 186.4603958 | 829.2766923 | 93.66505145 |
| 610.0327752 |             |             |             |             |
| SURF2       | SURF2       | 1076.053569 | 599.5089464 | 1090.528813 |
| 884.6456    |             |             |             |             |
| TMEM258     | TMEM258     | 5064.639353 | 6399.163776 | 4561.711017 |
| 4434.016361 |             |             |             |             |
| PDXP        | PDXP        | 4815.678266 | 2610.196808 | 2764.234078 |
| 3313.00758  |             |             |             |             |
| RPF2        | RPF2        | 4334.422943 | 3064.450282 | 3931.70204  |
| 4290.825388 |             |             |             |             |
| BMP7        | BMP7        | 1.041678189 | 2.641008574 | 1.115060136 |
| 3.923040355 |             |             |             |             |
| PPP4R2      | PPP4R2      | 2166.690632 | 3521.344766 | 1885.56669  |
| 1764.3874   |             |             |             |             |
| RBM26       | RBM26       | 2879.198514 | 3319.747778 | 3339.605108 |
| 3175.701167 |             |             |             |             |
| INVS        | INVS        | 1061.470074 | 982.4551896 | 1237.716751 |
| 1148.470064 |             |             |             |             |
| FUT8-AS1    | FUT8-AS1    |             | 119.7929917 | 179.5885831 |
| 105.9307129 | 86.3068878  |             |             |             |
| ILF3-AS1    | ILF3-AS1    |             | 670.8407535 | 559.0134816 |
| 938.8806347 | 599.2444142 |             |             |             |
| RASAL2      | RASAL2      | 0           | 1.760672383 | 0           |
| 0.980760089 |             |             |             |             |
| GPR88       | GPR88       | 0           | 0.880336191 | 0           |
| 3.923040355 |             |             |             |             |
| C2orf47     | C2orf47     | 1878.145774 | 1594.288843 | 1427.276974 |
| 1490.755335 |             |             |             |             |
| HPS6        | HPS6        | 2095.856516 | 2586.42773  | 1984.807043 |
| 2293.997847 |             |             |             |             |
| HHIPL2      | HHIPL2      | 0           | 4.401680957 | 1.115060136 |
| 3.923040355 |             |             |             |             |
| SHCBP1      | SHCBP1      | 13066.8112  | 10544.6669  | 4905.149539 |
| 6301.38357  |             |             |             |             |
| DEF6        | DEF6        | 12937.6431  | 10743.62288 | 6829.743335 |
| 8161.885458 |             |             |             |             |
| C1orf54     | C1orf54     | 66.66740408 | 22.00840479 | 82.51445008 |
| 28.44204257 |             |             |             |             |
| SH3TC2      | SH3TC2      | 1.041678189 | 0           | 0           |
| 0           |             |             |             |             |
| TNS3        | TNS3        | 80.20922053 | 1575.801783 | 34.56686422 |
| 1181.815907 |             |             |             |             |
| MRGPRX2     | MRGPRX2     | 1.041678189 | 7.042689532 | 0           |
| 0           |             |             |             |             |
| SLC35G5     | SLC35G5     | 4.166712755 | 3.521344766 | 2.230120273 |
| 0.980760089 |             |             |             |             |
| TNS4        | TNS4        | 51.04223125 | 146.1358078 | 34.56686422 |
| 82.38384745 |             |             |             |             |
| TMEM141     | TMEM141     | 671.8824317 | 902.3445962 | 1076.033031 |
| 899.3570013 |             |             |             |             |
| CSRNP1      | CSRNP1      | 2433.360249 | 2166.507367 | 3485.677986 |
| 4238.845103 |             |             |             |             |
| B3GALTL     | B3GALTL     | 1475.016315 | 1439.349673 | 1198.689646 |
| 1380.910205 |             |             |             |             |
| ZBTB41      | ZBTB41      | 334.3786986 | 432.24507   | 517.3879032 |

|             |            |             |             |             |             |
|-------------|------------|-------------|-------------|-------------|-------------|
| 318.7470288 |            |             |             |             |             |
| POLR2J4     | POLR2J4    | 777.0919288 | 614.4746616 | 928.8450935 |             |
| 806.1847929 |            |             |             |             |             |
| SCAND2P     | SCAND2P    | 379.1708607 | 473.620871  | 670.1511419 |             |
| 706.1472638 |            |             |             |             |             |
| LOC728554   | LOC728554  |             | 2522.944573 | 974.5321639 |             |
| 2011.568486 |            | 1125.912582 |             |             |             |
| SPATA31C1   | SPATA31C1  |             | 1.041678189 | 0.880336191 | 0           |
| 0           |            |             |             |             |             |
| PKI55       | PKI55      | 41.66712755 | 87.15328295 | 163.91384   |             |
| 86.3068878  |            |             |             |             |             |
| WTIP        | WTIP       | 0           | 0           | 11.15060136 | 3.923040355 |
| DCLK2       | DCLK2      | 0           | 2.641008574 | 0           | 0.980760089 |
| SNX32       | SNX32      | 33.33370204 | 31.69210289 | 18.95602232 |             |
| 44.13420399 |            |             |             |             |             |
| GATSL2      | GATSL2     | 44.79216211 | 102.1189982 | 60.21324736 |             |
| 38.24964346 |            |             |             |             |             |
| FOXN2       | FOXN2      | 3642.748626 | 4853.293423 | 3674.123149 |             |
| 3706.292375 |            |             |             |             |             |
| DRG2        | DRG2       | 3751.083158 | 3247.56021  | 2718.516612 |             |
| 2956.991667 |            |             |             |             |             |
| MORC3       | MORC3      | 3681.290719 | 2812.674132 | 7312.564374 |             |
| 3974.039879 |            |             |             |             |             |
| LINC00309   | LINC00309  |             | 12.50013826 | 27.29042193 |             |
| 4.460240545 |            | 4.903800443 |             |             |             |
| TTC21B-AS1  | TTC21B-AS1 |             | 0           | 1.760672383 | 0           |
| 2.942280266 |            |             |             |             |             |
| MZT2A       | MZT2A      | 2446.902065 | 2787.144382 | 1310.19566  |             |
| 2045.865545 |            |             |             |             |             |
| ADORA1      | ADORA1     | 1.041678189 | 0           | 0           | 0           |
| C21orf119   | C21orf119  |             | 227.0858451 | 193.6739621 |             |
| 279.8800942 |            | 208.9018989 |             |             |             |
| DCAF13P3    | DCAF13P3   |             | 11.45846008 | 5.282017149 | 0           |
| 15.69216142 |            |             |             |             |             |
| ALDH5A1     | ALDH5A1    | 666.6740408 | 1140.915704 | 1022.510145 |             |
| 1745.752958 |            |             |             |             |             |
| ANKAR       | ANKAR      | 111.4595662 | 118.8453858 | 112.6210738 |             |
| 120.6334909 |            |             |             |             |             |
| STAC3       | STAC3      | 16.66685102 | 32.57243908 | 13.38072164 |             |
| 16.67292151 |            |             |             |             |             |
| WDSUB1      | WDSUB1     | 142.7099119 | 274.6648917 | 195.1355238 |             |
| 413.8807574 |            |             |             |             |             |
| CPB2-AS1    | CPB2-AS1   |             | 23.95859834 | 9.683698106 |             |
| 12.2656615  |            | 17.6536816  |             |             |             |
| MIR6884     | MIR6884    | 25.00027653 | 39.61512861 | 36.7969845  |             |
| 56.88408514 |            |             |             |             |             |
| MIR8076     | MIR8076    | 0           | 0           | 1.115060136 | 0           |
| FAM50B      | FAM50B     | 858.3428275 | 909.3872858 | 892.048109  |             |
| 991.5484496 |            |             |             |             |             |
| SKAP2       | SKAP2      | 733.3414448 | 1757.151038 | 856.3661847 |             |

|             |             |             |             |             |             |   |
|-------------|-------------|-------------|-------------|-------------|-------------|---|
| 1559.408541 |             |             |             |             |             |   |
| TM9SF2      | TM9SF2      | 20971.06529 | 14688.40935 | 18361.69526 |             |   |
| 14612.34456 |             |             |             |             |             |   |
| HAR1B       | HAR1B       | 4.166712755 | 11.44437049 | 22.30120273 |             |   |
| 29.42280266 |             |             |             |             |             |   |
| WNT10B      | WNT10B      | 4.166712755 | 3.521344766 | 8.92048109  |             |   |
| 2.942280266 |             |             |             |             |             |   |
| L3HYPDH     | L3HYPDH     | 348.9621932 | 140.8537906 | 674.6113824 |             |   |
| 533.5334882 |             |             |             |             |             |   |
| AKR7A2P1    | AKR7A2P1    |             | 2.083356377 | 0           | 0           |   |
| 4.903800443 |             |             |             |             |             |   |
| ITPK1-AS1   | ITPK1-AS1   |             | 55.208944   | 57.22185244 |             |   |
| 56.86806695 | 56.88408514 |             |             |             |             |   |
| ZNF248      | ZNF248      | 439.5881956 | 589.8252483 | 584.2915114 |             |   |
| 740.4738669 |             |             |             |             |             |   |
| ARMC9       | ARMC9       | 267.7112945 | 225.366065  | 178.4096218 |             |   |
| 288.3434661 |             |             |             |             |             |   |
| ZNF705E     | ZNF705E     | 15.62517283 | 18.48706002 | 28.99156354 |             |   |
| 6.865320621 |             |             |             |             |             |   |
| TTC12       | TTC12       | 203.1272468 | 314.2800203 | 308.8716577 |             |   |
| 394.2655556 |             |             |             |             |             |   |
| IQCA1       | IQCA1       | 14.58349464 | 0.880336191 | 7.805420954 |             |   |
| 28.44204257 |             |             |             |             |             |   |
| SREBF2      | SREBF2      | 3504.205427 | 10162.60099 | 6953.51501  |             |   |
| 11504.31584 |             |             |             |             |             |   |
| TMEM168     | TMEM168     | 1057.303362 | 1473.682784 | 1377.099268 |             |   |
| 1524.101178 |             |             |             |             |             |   |
| RNU6-35P    | RNU6-35P    |             | 0           | 0.880336191 | 0           | 0 |
| MIR639      | MIR639      | 696.8827082 | 703.388617  | 486.1662194 |             |   |
| 608.071255  |             |             |             |             |             |   |
| GJA10       | GJA10       | 1.041678189 | 7.042689532 | 0           | 0           |   |
| LHX4        | LHX4        | 6.250069132 | 16.72638764 | 3.345180409 |             |   |
| 15.69216142 |             |             |             |             |             |   |
| UQCRFS1     | UQCRFS1     | 14705.37099 | 12048.28112 | 9123.422035 |             |   |
| 10404.88378 |             |             |             |             |             |   |
| CCIN        | CCIN        | 0           | 0.880336191 | 0           | 0           |   |
| NRR0S       | NRR0S       | 130.2097736 | 262.340185  | 49.062646   |             |   |
| 50.01876452 |             |             |             |             |             |   |
| FYC01       | FYC01       | 611.4650968 | 1175.248816 | 1107.254715 |             |   |
| 1186.719707 |             |             |             |             |             |   |
| ZNF853      | ZNF853      | 7.291747321 | 33.45277527 | 113.7361339 |             |   |
| 133.3833721 |             |             |             |             |             |   |
| SPTBN5      | SPTBN5      | 21.87524196 | 31.69210289 | 32.33674395 |             |   |
| 63.74940576 |             |             |             |             |             |   |
| SLC22A10    | SLC22A10    |             | 0           | 0           | 1.115060136 | 0 |
| PRKACG      | PRKACG      | 0           | 0.880336191 | 0           | 0           |   |
| MERTK       | MERTK       | 97.91774974 | 77.46958485 | 136.0373366 |             |   |
| 175.5560559 |             |             |             |             |             |   |
| TACC3       | TACC3       | 9533.438783 | 11021.80912 | 6501.915655 |             |   |
| 8653.246262 |             |             |             |             |             |   |

|             |             |             |             |             |
|-------------|-------------|-------------|-------------|-------------|
| C1GALT1C1   | C1GALT1C1   | 4711.510447 | 3170.090625 |             |
| 3293.887643 | 2945.222546 |             |             |             |
| TSR3        | TSR3        | 4468.79943  | 3509.900395 | 3615.024962 |
| 3971.097599 |             |             |             |             |
| ZIK1        | ZIK1        | 664.5906844 | 664.6538245 | 1088.298693 |
| 762.0505889 |             |             |             |             |
| PANX1       | PANX1       | 1589.600916 | 1441.110345 | 1280.089036 |
| 1129.835622 |             |             |             |             |
| PTGFRN      | PTGFRN      | 597.9232803 | 1122.428644 | 696.9125852 |
| 687.5128222 |             |             |             |             |
| CTBS        | CTBS        | 1983.355271 | 2519.52218  | 2243.500994 |
| 2433.26578  |             |             |             |             |
| NLRP11      | NLRP11      | 0           | 0           | 2.942280266 |
| PIM3        | PIM3        | 15343.91972 | 13979.73872 | 11749.38866 |
| 15361.64527 |             |             |             |             |
| TMEM92      | TMEM92      | 7.291747321 | 9.683698106 | 3.345180409 |
| 0.980760089 |             |             |             |             |
| LINC01304   | LINC01304   | 0           | 0           | 2.230120273 |
| CEBPZ05     | CEBPZ05     | 1292.722632 | 2121.610221 | 2012.683546 |
| 1890.905451 |             |             |             | 0           |
| CCDC103     | CCDC103     | 34.37538023 | 44.89714576 | 53.52288654 |
| 29.42280266 |             |             |             |             |
| MGME1       | MGME1       | 4391.715244 | 2782.742701 | 3274.93162  |
| 2669.628961 |             |             |             |             |
| ARSB        | ARSB        | 2367.734523 | 2420.924526 | 1753.989594 |
| 1702.599514 |             |             |             |             |
| RMI2        | RMI2        | 2448.985422 | 4191.280607 | 1845.424526 |
| 4128.019213 |             |             |             |             |
| OR5B21      | OR5B21      | 0           | 1.760672383 | 0           |
| SNHG3       | SNHG3       | 1005.219452 | 1123.30898  | 2.942280266 |
| 1045.490255 |             |             |             | 867.516786  |
| MKX         | MKX         | 0           | 0           | 47.94758586 |
| BAIAP2L1    | BAIAP2L1    | 294.375876  | 149.0755335 | 14.71140133 |
| 21.18614259 |             |             |             | 58.10218863 |
| LOC256880   | LOC256880   | 21.87524196 | 14.96571525 |             |
| 9.807600887 |             |             |             |             |
| SNRPC       | SNRPC       | 15034.5413  | 12998.16387 | 10742.48935 |
| 11618.08401 |             |             |             |             |
| SACS-AS1    | SACS-AS1    | 3.125034566 | 0           | 0           |
| ZNF192P1    | ZNF192P1    | 11.45846008 | 14.08537906 | 0           |
| 28.99156354 |             |             |             |             |
| ZER1        | ZER1        | 2283.35859  | 2002.764836 | 3241.479816 |
| 2964.837748 |             |             |             |             |
| RGS18       | RGS18       | 15.62517283 | 44.01680957 | 20.07108245 |
| 17.6536816  |             |             |             |             |
| MIR103A2    | MIR103A2    | 28.12531109 | 26.41008574 |             |
| 39.02710477 |             |             |             |             |
| MIR29B2     | MIR29B2     | 0           | 0           | 2.230120273 |
| TMEM158     | TMEM158     | 5.208390943 | 0.880336191 | 0.980760089 |
| 2.942280266 |             |             |             | 11.15060136 |

|              |              |             |             |             |             |
|--------------|--------------|-------------|-------------|-------------|-------------|
| HMGA1        | HMGA1        | 8465.71864  | 10490.08606 | 7257.926427 |             |
| 8725.822509  |              |             |             |             |             |
| MIR4273      | MIR4273      | 0           | 1.760672383 | 0           | 4.903800443 |
| DDX10        | DDX10        | 3014.616678 | 2118.088877 | 3446.650881 |             |
| 2702.974804  |              |             |             |             |             |
| CYBB         | CYBB         | 1.041678189 | 0           | 0           | 0           |
| TSTD1        | TSTD1        | 1895.854303 | 2218.447202 | 2142.030522 |             |
| 2363.631814  |              |             |             |             |             |
| FAM159A      | FAM159A      | 85.41761147 | 36.97412004 | 144.9578177 |             |
| 80.42232727  |              |             |             |             |             |
| CXCL2        | CXCL2        | 4.166712755 | 0           | 0           | 0.980760089 |
| MIR1539      | MIR1539      | 0           | 0           | 2.230120273 | 2.942280266 |
| MIR1537      | MIR1537      | 0           | 0           | 1.961520177 |             |
| MNS1         | MNS1         | 4.166712755 | 7.923025723 | 0           | 8.826840798 |
| MIR3687-1    | MIR3687-1    |             | 1.041678189 | 44.89714576 |             |
| 36.7969845   |              | 19.61520177 |             |             |             |
| MIR3685      | MIR3685      | 0           | 0.880336191 | 0           | 0           |
| MIR3682      | MIR3682      | 2.083356377 | 4.401680957 | 3.345180409 |             |
| 2.942280266  |              |             |             |             |             |
| MIR3679      | MIR3679      | 0           | 3.521344766 | 3.345180409 | 1.961520177 |
| PRCD         | PRCD         | 2.083356377 | 0           | 6.690360818 | 1.961520177 |
| LOC401320    | LOC401320    |             | 135.4181645 | 134.6914373 |             |
| 143.8427576  |              | 167.7099752 |             |             |             |
| AATK-AS1     | AATK-AS1     |             | 0           | 0           | 1.115060136 |
| STX7         | STX7         | 1593.767629 | 1184.052177 | 1234.371571 | 0           |
| 1193.585028  |              |             |             |             |             |
| FLJ37035     | FLJ37035     |             | 48.95887487 | 58.10218863 |             |
| 80.28432981  |              | 34.3266031  |             |             |             |
| LINC00891    | LINC00891    |             | 21.87524196 | 31.69210289 |             |
| 14.49578177  |              | 6.865320621 |             |             |             |
| LOC100132741 | LOC100132741 |             | 21.87524196 | 31.69210289 |             |
| 14.49578177  |              | 6.865320621 |             |             |             |
| PIM2         | PIM2         | 59846.4953  | 45970.27558 | 40258.13116 |             |
| 43765.4382   |              |             |             |             |             |
| LINC01088    | LINC01088    |             | 1.041678189 | 1.760672383 | 0           |
| 4.903800443  |              |             |             |             |             |
| OR4N3P       | OR4N3P       | 3.125034566 | 0           | 0           | 0           |
| PRKY         | PRKY         | 0           | 987.7372068 | 0           | 1205.354149 |
| ATP8A2       | ATP8A2       | 27.08363291 | 57.22185244 | 113.7361339 |             |
| 59.82636541  |              |             |             |             |             |
| CDC40        | CDC40        | 1746.894322 | 1416.460932 | 1972.541381 |             |
| 1639.830868  |              |             |             |             |             |
| C14orf119    | C14orf119    |             | 5491.727411 | 5576.929773 |             |
| 5793.852468  |              | 5697.235355 |             |             |             |
| ZNF354A      | ZNF354A      | 267.7112945 | 235.0497631 | 1037.005927 |             |
| 678.6859814  |              |             |             |             |             |
| TAF15        | TAF15        | 442.7132302 | 1151.479738 | 653.4252399 |             |
| 637.4940576  |              |             |             |             |             |
| CC2D1A       | CC2D1A       | 1490.641488 | 1767.715072 | 1061.53725  |             |
| 1625.119467  |              |             |             |             |             |

|              |              |             |             |             |
|--------------|--------------|-------------|-------------|-------------|
| ITGAE        | ITGAE        | 3609.414924 | 2929.758845 | 2045.02029  |
| 1947.789536  |              |             |             |             |
| OSGIN2       | OSGIN2       | 2664.612807 | 2310.002166 | 2970.520203 |
| 2602.937275  |              |             |             |             |
| PEX7         | PEX7         | 329.1703076 | 315.1603565 | 335.633101  |
| 376.611874   |              |             |             |             |
| PEX6         | PEX6         | 1958.354995 | 285.228926  | 1871.070909 |
| 358.9581925  |              |             |             |             |
| PEX12        | PEX12        | 283.3364673 | 320.4423737 | 825.1445008 |
| 578.6484523  |              |             |             |             |
| SETD8        | SETD8        | 1128.137478 | 1427.024966 | 634.4692175 |
| 902.2992816  |              |             |             |             |
| CRYGN        | CRYGN        | 0           | 2.230120273 | 2.942280266 |
| H2AFX        | H2AFX        | 4892.762452 | 6587.555721 | 3022.928029 |
| 3768.080261  |              |             |             |             |
| H3F3A        | H3F3A        | 16808.51925 | 22024.25084 | 12293.538   |
| 12717.51607  |              |             |             |             |
| UBE2D2       | UBE2D2       | 10532.40817 | 11160.0219  | 8890.374466 |
| 7670.524653  |              |             |             |             |
| NAP1L3       | NAP1L3       | 119.7929917 | 102.1189982 | 305.5264773 |
| 300.1125871  |              |             |             |             |
| NAIP         | NAIP         | 29.16698928 | 41.375801   | 17.84096218 |
| 63.74940576  |              |             |             |             |
| ECH1         | ECH1         | 12126.17579 | 10579.00001 | 9101.120832 |
| 10381.34554  |              |             |             |             |
| RNU6-19P     | RNU6-19P     |             | 1.041678189 | 1.760672383 |
| 2.230120273  | 0.980760089  |             |             |             |
| RNU6-28P     | RNU6-28P     |             | 0           | 0           |
| ANKDD1B      | ANKDD1B      | 29.16698928 | 22.00840479 | 10.03554123 |
| 7.846080709  |              |             |             |             |
| COL27A1      | COL27A1      | 0           | 12.32470668 | 0           |
| ZNF526       | ZNF526       | 1116.679018 | 1346.914373 | 19.61520177 |
| 1082.759138  |              |             |             | 1255.557713 |
| STAB1        | STAB1        | 70.83411683 | 134.6914373 | 61.32830749 |
| 82.38384745  |              |             |             |             |
| NUP205       | NUP205       | 8384.467741 | 11660.05286 | 8590.42329  |
| 9644.794712  |              |             |             |             |
| LARS         | LARS         | 8934.473824 | 7813.864035 | 9302.946717 |
| 9679.121315  |              |             |             |             |
| LOC100506603 | LOC100506603 |             | 89.58432423 | 71.30723151 |
| 205.1710651  | 173.5945357  |             |             |             |
| FLJ31306     | FLJ31306     |             | 554.1727964 | 804.627279  |
| 786.1173961  | 819.9154341  |             |             |             |
| GPR25        | GPR25        | 15.62517283 | 5.282017149 | 64.6734879  |
| 30.40356275  |              |             |             |             |
| GRAMD4       | GRAMD4       | 1954.188282 | 3221.150124 | 924.384853  |
| 2338.132051  |              |             |             |             |
| MIR6856      | MIR6856      | 11.45846008 | 2.641008574 | 12.2656615  |
| 3.923040355  |              |             |             |             |
| MIR7974      | MIR7974      | 0           | 1.115060136 | 2.942280266 |

|              |              |             |             |             |             |
|--------------|--------------|-------------|-------------|-------------|-------------|
| MIR6855      | MIR6855      | 5.208390943 | 9.683698106 | 8.92048109  |             |
| 10.78836098  |              |             |             |             |             |
| MIR6854      | MIR6854      | 0           | 3.521344766 | 0           | 2.942280266 |
| SNRPG        | SNRPG        | 18241.86844 | 18966.84324 | 14286.15047 |             |
| 15018.37924  |              |             |             |             |             |
| RPS9         | RPS9         | 7107.370281 | 7247.807864 | 7391.733643 |             |
| 6956.531309  |              |             |             |             |             |
| NCF1         | NCF1         | 70.83411683 | 51.0594991  | 66.90360818 |             |
| 47.07648426  |              |             |             |             |             |
| YBX3P1       | YBX3P1       | 0           | 0           | 0           | 0.980760089 |
| LMD2         | LMD2         | 0           | 1.760672383 | 0           | 0           |
| PRR15L       | PRR15L       | 3.125034566 | 3.521344766 | 4.460240545 |             |
| 3.923040355  |              |             |             |             |             |
| TSGA10IP     | TSGA10IP     |             | 0           | 0           | 8.92048109  |
| 0.980760089  |              |             |             |             |             |
| MIR302B      | MIR302B      | 4.166712755 | 0.880336191 | 0           | 1.961520177 |
| URAHP        | URAHP        | 72.91747321 | 53.70050768 | 79.16926967 |             |
| 226.5555805  |              |             |             |             |             |
| IGF1R        | IGF1R        | 87.50096785 | 369.7412004 | 685.7619838 |             |
| 381.5156745  |              |             |             |             |             |
| GALNT1       | GALNT1       | 6012.566505 | 6995.151377 | 4221.617676 |             |
| 5282.373838  |              |             |             |             |             |
| ATP5J2-PTCD1 | ATP5J2-PTCD1 |             | 11062.62236 | 10099.21679 |             |
| 8301.622714  | 8819.975477  |             |             |             |             |
| EXTL1        | EXTL1        | 0           | 0           | 1.115060136 | 0           |
| MMP19        | MMP19        | 72.91747321 | 117.9650497 | 22.30120273 |             |
| 76.49928692  |              |             |             |             |             |
| TUBG2        | TUBG2        | 176.0436139 | 209.5200136 | 215.2066063 |             |
| 327.5738696  |              |             |             |             |             |
| KHSRP        | KHSRP        | 684.38257   | 3952.7095   | 948.916176  |             |
| 936.6258847  |              |             |             |             |             |
| CPSF2        | CPSF2        | 6770.908227 | 6128.900565 | 5899.783181 |             |
| 5672.716353  |              |             |             |             |             |
| RAP1GAP2     | RAP1GAP2     |             | 204.168925  | 422.5613719 |             |
| 79.16926967  | 14.71140133  |             |             |             |             |
| MIR26A2      | MIR26A2      | 1.041678189 | 0           | 0           | 3.923040355 |
| MIR30E       | MIR30E       | 0           | 0.880336191 | 0           | 0           |
| ZNF518B      | ZNF518B      | 795.8421362 | 1162.924109 | 1341.417344 |             |
| 1140.623983  |              |             |             |             |             |
| ZBTB20-AS1   | ZBTB20-AS1   |             | 12.50013826 | 10.5640343  |             |
| 85.85963049  | 80.42232727  |             |             |             |             |
| CLLU1        | CLLU1        | 5.208390943 | 0           | 15.61084191 | 0.980760089 |
| CXorf65      | CXorf65      | 265.6279381 | 216.5627031 | 266.4993726 |             |
| 178.4983361  |              |             |             |             |             |
| GTF2H2C      | GTF2H2C      | 1353.139967 | 829.2766923 | 1268.938435 |             |
| 1121.989541  |              |             |             |             |             |
| MACROD2-AS1  | MACROD2-AS1  |             | 0           | 0           | 0           |
| ILDR2        | ILDR2        | 108.3345316 | 347.7327956 | 123.7716751 | 0.980760089 |
| 188.305937   |              |             |             |             |             |
| SFT2D2       | SFT2D2       | 1439.599257 | 1634.784308 | 1120.635437 |             |



|             |           |             |             |             |             |
|-------------|-----------|-------------|-------------|-------------|-------------|
| 1295.584077 |           |             |             |             |             |
| ZNF256      | ZNF256    | 309.378422  | 345.091787  | 557.5300681 |             |
| 428.5921587 |           |             |             |             |             |
| FOXD1       | FOXD1     | 2.083356377 | 3.521344766 | 6.690360818 | 0           |
| TMEM102     | TMEM102   | 914.5934497 | 838.9603904 | 944.4559354 |             |
| 957.2218465 |           |             |             |             |             |
| HIST1H2BE   | HIST1H2BE |             | 12.50013826 | 35.21344766 |             |
| 3.345180409 |           | 8.826840798 |             |             |             |
| GOLGA2P5    | GOLGA2P5  |             | 112.5012444 | 262.340185  |             |
| 79.16926967 |           | 201.0558182 |             |             |             |
| PLIN5       | PLIN5     | 2.083356377 | 0           | 11.15060136 | 3.923040355 |
| MTG2        | MTG2      | 1822.93683  | 1382.127821 | 1639.1384   |             |
| 1773.21424  |           |             |             |             |             |
| NHP2        | NHP2      | 11731.37976 | 8169.519857 | 9841.520763 |             |
| 10347.9997  |           |             |             |             |             |
| SLC25A52    | SLC25A52  |             | 0           | 2.641008574 | 0           |
| QSER1       | QSER1     | 155.2100501 | 292.2716156 | 259.8090118 | 0           |
| 159.8638945 |           |             |             |             |             |
| MEIS3       | MEIS3     | 1.041678189 | 0           | 0           | 5.884560532 |
| GRIPAP1     | GRIPAP1   | 2057.314423 | 2650.692272 | 1852.114886 |             |
| 2024.288823 |           |             |             |             |             |
| ATP6V0D1    | ATP6V0D1  |             | 8569.886458 | 6304.967803 |             |
| 6380.3741   |           | 4872.416121 |             |             |             |
| ERI3        | ERI3      | 2519.819538 | 1952.585673 | 2332.705805 |             |
| 2433.26578  |           |             |             |             |             |
| TIFA        | TIFA      | 1870.854027 | 2792.426399 | 3175.691268 |             |
| 3600.370286 |           |             |             |             |             |
| SCGB3A1     | SCGB3A1   | 2.083356377 | 0.880336191 | 0           | 0           |
| MIR4800     | MIR4800   | 84.37593328 | 45.77748195 | 98.12529199 |             |
| 79.44156718 |           |             |             |             |             |
| MIR5047     | MIR5047   | 892.7182077 | 1032.634353 | 1441.772756 |             |
| 1841.867447 |           |             |             |             |             |
| VWA8-AS1    | VWA8-AS1  |             | 0           | 0           | 20.07108245 |
| 1.961520177 |           |             |             |             |             |
| MRPL22      | MRPL22    | 6528.197209 | 5759.159364 | 4825.98027  |             |
| 5019.530134 |           |             |             |             |             |
| TRIM28      | TRIM28    | 10593.86718 | 9621.194236 | 10637.6737  |             |
| 10793.26478 |           |             |             |             |             |
| MY01F       | MY01F     | 15446.00418 | 14801.97272 | 2753.083476 |             |
| 4434.016361 |           |             |             |             |             |
| FAHD2B      | FAHD2B    | 1047.928258 | 1000.061913 | 725.9041487 |             |
| 1200.450349 |           |             |             |             |             |
| BECN1       | BECN1     | 10750.11891 | 8634.337366 | 9135.687696 |             |
| 8655.207782 |           |             |             |             |             |
| FAM114A2    | FAM114A2  |             | 2142.732034 | 1866.312726 |             |
| 1917.903434 |           | 1882.07861  |             |             |             |
| INTS3       | INTS3     | 2445.860387 | 2824.998838 | 2690.640109 |             |
| 3109.990241 |           |             |             |             |             |
| NT5C2       | NT5C2     | 6601.114682 | 6871.90431  | 4459.125485 |             |
| 6008.136303 |           |             |             |             |             |

|              |              |             |             |             |             |
|--------------|--------------|-------------|-------------|-------------|-------------|
| C9orf114     | C9orf114     | 6261.527592 | 4701.875598 |             |             |
| 5460.449487  | 5645.25507   |             |             |             |             |
| DNAJB13      | DNAJB13      | 1.041678189 | 5.282017149 | 18.95602232 |             |
| 7.846080709  |              |             |             |             |             |
| LINC01097    | LINC01097    | 2.083356377 | 0           | 0           | 0           |
| C6orf132     | C6orf132     | 0           | 10.5640343  | 2.230120273 |             |
|              | 10.78836098  |             |             |             |             |
| CBY3         | CBY3         | 22.91692015 | 11.44437049 | 23.41626286 |             |
| 12.74988115  |              |             |             |             |             |
| ANKRD31      | ANKRD31      | 4.166712755 | 14.96571525 | 81.39938995 |             |
| 50.01876452  |              |             |             |             |             |
| MIR4637      | MIR4637      | 1.041678189 | 0           | 0           | 0           |
| MIR4633      | MIR4633      | 2.083356377 | 1.760672383 | 0           | 3.923040355 |
| MIR4632      | MIR4632      | 170.8352229 | 93.31563629 | 40.14216491 |             |
| 92.19144833  |              |             |             |             |             |
| ROGDI        | ROGDI        | 523.9641289 | 363.5788471 | 304.4114172 |             |
| 367.7850333  |              |             |             |             |             |
| C15orf54     | C15orf54     | 2.083356377 | 0           | 0           |             |
| 0.980760089  |              |             |             |             |             |
| DNAH10       | DNAH10       | 15.62517283 | 12.32470668 | 26.76144327 |             |
| 18.63444168  |              |             |             |             |             |
| FAM223B      | FAM223B      | 1.041678189 | 0.880336191 | 0           | 0           |
| APOC1P1      | APOC1P1      | 0           | 1.115060136 | 0           |             |
| FLJ36777     | FLJ36777     | 0           | 3.521344766 | 25.64638313 |             |
|              | 3.923040355  |             |             |             |             |
| LOC283788    | LOC283788    | 2635.445817 | 2418.283518 |             |             |
| 2811.066604  | 1744.772198  |             |             |             |             |
| MIR4308      | MIR4308      | 4.166712755 | 3.521344766 | 3.345180409 | 0           |
| RPS6         | RPS6         | 32658.69457 | 29715.74814 | 38824.16382 |             |
| 36204.75867  |              |             |             |             |             |
| OR6C68       | OR6C68       | 1.041678189 | 0           | 3.345180409 | 0           |
| FOXD3        | FOXD3        | 1.041678189 | 3.521344766 | 0           | 0           |
| TRPA1        | TRPA1        | 22.91692015 | 71.30723151 | 53.52288654 |             |
| 77.480047    |              |             |             |             |             |
| SCARB1       | SCARB1       | 657.2989371 | 749.1660989 | 473.9005579 |             |
| 814.0308736  |              |             |             |             |             |
| FUOM         | FUOM         | 453.1300121 | 582.7825587 | 645.6198189 |             |
| 928.779804   |              |             |             |             |             |
| LOC101928303 | LOC101928303 | 0           | 1.760672383 | 0           |             |
| 0.980760089  |              |             |             |             |             |
| OGFR         | OGFR         | 4827.136726 | 3806.573692 | 7017.073438 |             |
| 4266.306386  |              |             |             |             |             |
| SIX3         | SIX3         | 6.250069132 | 0           | 0           | 0           |
| NID2         | NID2         | 90.62600242 | 38.73479242 | 52.4078264  |             |
| 30.40356275  |              |             |             |             |             |
| BGLAP        | BGLAP        | 116.6679571 | 170.7852211 | 134.9222765 |             |
| 182.4213765  |              |             |             |             |             |
| CCDC80       | CCDC80       | 1.041678189 | 2.641008574 | 2.230120273 |             |
| 5.884560532  |              |             |             |             |             |
| LINC01227    | LINC01227    | 3.125034566 | 9.683698106 | 0           |             |

|              |              |             |             |             |             |
|--------------|--------------|-------------|-------------|-------------|-------------|
|              |              | 3.923040355 |             |             |             |
| ZNF497       | ZNF497       | 235.4192706 | 221.8447202 | 273.1897334 |             |
|              |              | 257.9399033 |             |             |             |
| AP00L        | AP00L        | 471.8802195 | 821.3536666 | 393.6162281 |             |
|              |              | 466.8418022 |             |             |             |
| RPS4Y1       | RPS4Y1       | 0           | 5677.288099 | 0           | 5838.464808 |
| RPL7A        | RPL7A        | 13854.31991 | 12863.47243 | 14096.59024 |             |
|              |              | 13470.73982 |             |             |             |
| C14orf39     | C14orf39     | 0           | 0.880336191 | 0           | 0           |
| TMTC1        | TMTC1        | 31.25034566 | 22.88874098 | 1.115060136 |             |
|              |              | 7.846080709 |             |             |             |
| SIGLEC14     | SIGLEC14     | 0           | 0           | 1.115060136 | 0           |
| SDR42E1      | SDR42E1      | 562.5062219 | 332.7670804 | 609.9378945 |             |
|              |              | 534.5142483 |             |             |             |
| THAP6        | THAP6        | 1242.722079 | 975.4125001 | 1758.449835 |             |
|              |              | 1401.506167 |             |             |             |
| SLM02        | SLM02        | 5650.062495 | 6003.012489 | 5170.533852 |             |
|              |              | 4816.512795 |             |             |             |
| ZNRF2        | ZNRF2        | 921.885197  | 583.6628949 | 846.3306434 |             |
|              |              | 752.242988  |             |             |             |
| ESRP2        | ESRP2        | 211.4606723 | 253.5368231 | 188.445163  |             |
|              |              | 188.305937  |             |             |             |
| TMEM69       | TMEM69       | 2771.90566  | 1946.423319 | 2640.462403 |             |
|              |              | 2363.631814 |             |             |             |
| VTA1         | VTA1         | 9380.312089 | 6856.938595 | 8420.934149 |             |
|              |              | 7931.406837 |             |             |             |
| LACTB2       | LACTB2       | 1084.386994 | 1119.787636 | 1351.452885 |             |
|              |              | 1208.296429 |             |             |             |
| RBMX2        | RBMX2        | 742.7165485 | 844.2424076 | 659.0005405 |             |
|              |              | 639.4555778 |             |             |             |
| PCED1A       | PCED1A       | 112.5012444 | 237.6907717 | 343.438522  |             |
|              |              | 407.9961969 |             |             |             |
| C11orf31     | C11orf31     | 5843.814639 | 5120.915626 |             |             |
|              |              | 4450.205004 | 4876.339161 |             |             |
| LYPLA2P2     | LYPLA2P2     | 2.083356377 | 4.401680957 |             |             |
|              |              | 1.115060136 | 0           |             |             |
| LOC101929454 | LOC101929454 | 0           | 0           | 0           | 0.980760089 |
| MLK7-AS1     | MLK7-AS1     | 666.6740408 | 686.6622293 |             |             |
|              |              | 199.5957644 | 377.5926341 |             |             |
| LOC653712    | LOC653712    | 22.91692015 | 32.57243908 |             |             |
|              |              | 24.531323   | 20.59596186 |             |             |
| ANGEL1       | ANGEL1       | 1258.347252 | 1223.667306 | 1946.894998 |             |
|              |              | 2031.154144 |             |             |             |
| OXCT2        | OXCT2        | 15.62517283 | 13.20504287 | 22.30120273 |             |
|              |              | 27.46128248 |             |             |             |
| MAP10        | MAP10        | 148.959981  | 160.2211868 | 146.0728779 |             |
|              |              | 181.4406164 |             |             |             |
| RIMS2        | RIMS2        | 7.291747321 | 9.683698106 | 1.115060136 |             |
|              |              | 4.903800443 |             |             |             |
| GAB2         | GAB2         | 291.6698928 | 475.3815434 | 199.5957644 |             |

|              |              |             |             |             |             |
|--------------|--------------|-------------|-------------|-------------|-------------|
| 78.46080709  |              |             |             |             |             |
| FAIM2        | FAIM2        | 9.375103698 | 25.52974955 | 8.92048109  |             |
| 85.32612771  |              |             |             |             |             |
| TIMM44       | TIMM44       | 1768.769564 | 1529.143965 | 1978.116682 |             |
| 1660.42683   |              |             |             |             |             |
| CENPF        | CENPF        | 5035.472364 | 6304.967803 | 2964.944902 |             |
| 3643.523729  |              |             |             |             |             |
| MACF1        | MACF1        | 4650.051434 | 7798.89832  | 3872.603853 |             |
| 4838.089517  |              |             |             |             |             |
| SLC27A4      | SLC27A4      | 1700.018804 | 1535.306318 | 1374.869148 |             |
| 1174.950586  |              |             |             |             |             |
| SNORD8       | SNORD8       | 0           | 0.880336191 | 2.230120273 | 9.807600887 |
| MIR190B      | MIR190B      | 0           | 0.880336191 | 0           | 0           |
| WAC-AS1      | WAC-AS1      | 506.2555997 | 486.8259139 | 414.8023707 |             |
| 479.5916834  |              |             |             |             |             |
| MIR659       | MIR659       | 0           | 4.401680957 | 4.460240545 | 0.980760089 |
| SPRNP1       | SPRNP1       | 0           | 0           | 0.980760089 |             |
| CTGLF12P     | CTGLF12P     |             | 0           | 7.042689532 | 2.230120273 |
| 11.76912106  |              |             |             |             |             |
| GYG2P1       | GYG2P1       | 0           | 0.880336191 | 0           | 0           |
| LOC389705    | LOC389705    |             | 6.250069132 | 8.803361914 |             |
| 45.71746559  |              | 23.53824213 |             |             |             |
| SNORD121A    | SNORD121A    |             | 1.041678189 | 2.641008574 |             |
| 7.805420954  |              | 0           |             |             |             |
| CTNNAL1      | CTNNAL1      | 1814.603405 | 2288.874098 | 1253.327593 |             |
| 1193.585028  |              |             |             |             |             |
| GUSBP4       | GUSBP4       | 291.6698928 | 286.9895984 | 545.2644066 |             |
| 363.8619929  |              |             |             |             |             |
| LOC101060321 | LOC101060321 |             | 43.75048393 | 54.58084387 |             |
| 51.29276627  |              | 65.71092594 |             |             |             |
| XRCC6P5      | XRCC6P5      | 0           | 0.880336191 | 0           | 0           |
| LINC01194    | LINC01194    |             | 0           | 5.282017149 | 0           |
| NLRP6        | NLRP6        | 134.3764863 | 205.1183326 | 575.3710303 | 0           |
| 449.1881206  |              |             |             |             |             |
| REX04        | REX04        | 2677.112945 | 1875.116088 | 2814.411784 |             |
| 2367.554854  |              |             |             |             |             |
| ZNF730       | ZNF730       | 22.91692015 | 124.127403  | 3.345180409 |             |
| 38.24964346  |              |             |             |             |             |
| SPR          | SPR          | 172.9185793 | 157.5801783 | 253.1186509 |             |
| 380.5349144  |              |             |             |             |             |
| OARD1        | OARD1        | 2227.107967 | 1846.94533  | 2798.800942 |             |
| 2564.687632  |              |             |             |             |             |
| TNFAIP8L3    | TNFAIP8L3    |             | 18.7502074  | 24.64941336 |             |
| 45.71746559  |              | 13.73064124 |             |             |             |
| TOMM20L      | TOMM20L      | 156.2517283 | 127.6487478 | 162.7987799 |             |
| 106.9028497  |              |             |             |             |             |
| ANGPTL2      | ANGPTL2      | 2.083356377 | 0           | 0           | 0.980760089 |
| DPF3         | DPF3         | 120.8346699 | 169.9048849 | 22.30120273 |             |
| 50.99952461  |              |             |             |             |             |
| APOBEC3G     | APOBEC3G     |             | 17117.89767 | 10032.31124 |             |

|                 |               |             |               |             |
|-----------------|---------------|-------------|---------------|-------------|
| 8907.100368     | 8410.01776    |             |               |             |
| ZNF571-AS1      | ZNF571-AS1    | 63.54236951 | 73.94824008   |             |
| 224.1270874     | 110.82589     |             |               |             |
| LOC286059       | LOC286059     | 4.166712755 | 0             | 5.575300681 |
| 3.923040355     |               |             |               |             |
| LINC01342       | LINC01342     | 0           | 0.880336191   | 0           |
| 1.961520177     |               |             |               |             |
| TWF1 TWF1       | 2597.945403   | 1890.962139 | 2327.130504   |             |
| 1633.946308     |               |             |               |             |
| MIR3198-1       | MIR3198-1     | 1.041678189 | 0             | 2.230120273 |
| 3.923040355     |               |             |               |             |
| RAB30-AS1       | RAB30-AS1     | 388.5459644 | 371.5018728   |             |
| 555.2999479     | 320.708549    |             |               |             |
| FAM78B FAM78B   | 88.54264604   | 18.48706002 | 57.98312709   |             |
| 8.826840798     |               |             |               |             |
| AASS AASS       | 76.04250777   | 275.5452279 | 137.1523968   |             |
| 218.7094998     |               |             |               |             |
| C11orf58        | C11orf58      | 12770.97459 | 11299.99535   |             |
| 11369.15315     | 12351.69256   |             |               |             |
| ZNF608 ZNF608   | 0 7.923025723 | 11.15060136 | 0             |             |
| SF3B6 SF3B6     | 6241.735707   | 6443.180585 | 6332.426514   |             |
| 5970.86742      |               |             |               |             |
| LMAN1 LMAN1     | 12987.64366   | 11306.15771 | 10739.14417   |             |
| 11957.427       |               |             |               |             |
| NCCRP1 NCCRP1   | 0 1.760672383 | 0           | 3.923040355   |             |
| C14orf169       | C14orf169     | 2769.822304 | 2244.857288   |             |
| 3408.738837     | 2599.014235   |             |               |             |
| PDZD11 PDZD11   | 2301.067119   | 1966.671052 | 1262.248074   |             |
| 1321.083839     |               |             |               |             |
| REBP RENBP      | 69.79243864   | 83.63193819 | 94.78011158   |             |
| 103.9605694     |               |             |               |             |
| ZMYM4 ZMYM4     | 1869.812349   | 2445.57394  | 1875.531149   |             |
| 2222.402361     |               |             |               |             |
| MIR421 MIR421   | 16.66685102   | 7.923025723 | 2.230120273   |             |
| 7.846080709     |               |             |               |             |
| LOC439994       | LOC439994     | 167.7101884 | 102.1189982   |             |
| 196.250584      | 103.9605694   |             |               |             |
| CD180 CD180     | 64.5840477    | 150.5374887 | 0 41.19192372 |             |
| GPR182 GPR182   | 2.083356377   | 0 0         | 0             |             |
| LOC100192426    | LOC100192426  | 0 0         | 0 0.980760089 |             |
| TMEM45B TMEM45B | 27.08363291   | 8.803361914 | 366.8547848   |             |
| 154.960094      |               |             |               |             |
| WIZ WIZ         | 69.79243864   | 230.6480822 | 75.82408927   |             |
| 114.7489304     |               |             |               |             |
| EHD1 EHD1       | 6919.868208   | 7123.680461 | 5267.544084   |             |
| 5674.677873     |               |             |               |             |
| LOC102724601    | LOC102724601  | 42.70880574 | 31.69210289   |             |
| 26.76144327     | 22.55748204   |             |               |             |
| PAN3-AS1        | PAN3-AS1      | 40.62544936 | 78.34992104   |             |
| 57.98312709     | 64.73016585   |             |               |             |

|                 |              |             |             |             |             |
|-----------------|--------------|-------------|-------------|-------------|-------------|
| LBX1-AS1        | LBX1-AS1     | 0           | 0           | 0           | 1.961520177 |
| VKORC1L1        | VKORC1L1     | 1180.221388 |             | 1978.995758 |             |
| 976.7926794     | 1006.259851  |             |             |             |             |
| LEF1-AS1        | LEF1-AS1     | 489.5887487 |             | 599.5089464 |             |
| 1390.47999      | 1357.371963  |             |             |             |             |
| FAM160A1        | FAM160A1     | 0           | 0           | 60.21324736 |             |
| 10.78836098     |              |             |             |             |             |
| LOC100128398    | LOC100128398 | 44.79216211 |             | 76.58924866 |             |
| 86.97469063     | 56.88408514  |             |             |             |             |
| BEND3 BEND3     | 196.8771777  | 405.8349843 |             | 289.9156354 |             |
| 258.9206634     |              |             |             |             |             |
| PALM2 PALM2     | 17.70852921  | 85.39261057 |             | 7.805420954 |             |
| 115.7296905     |              |             |             |             |             |
| LOC728613       | LOC728613    | 91.66768061 |             | 150.5374887 |             |
| 227.4722678     | 228.5171007  |             |             |             |             |
| BCAS2 BCAS2     | 5567.769919  | 4396.39894  |             | 4728.970038 |             |
| 4297.690709     |              |             |             |             |             |
| LGALS16 LGALS16 | 0            | 2.641008574 | 0           | 0           |             |
| BTBD6 BTBD6     | 3000.033183  | 1862.791381 |             | 2078.472094 |             |
| 2062.538466     |              |             |             |             |             |
| RNASET2 RNASET2 | 1800.01991   | 2829.400519 |             | 2939.298519 |             |
| 5111.721582     |              |             |             |             |             |
| NDUFA6 NDUFA6   | 9015.724723  | 9288.427156 |             | 7058.330663 |             |
| 6885.916583     |              |             |             |             |             |
| PLCG1 PLCG1     | 1529.183581  | 6097.208462 |             | 2099.658237 |             |
| 3086.451999     |              |             |             |             |             |
| PTOV1 PTOV1     | 2247.941531  | 2812.674132 |             | 2389.573872 |             |
| 3243.373613     |              |             |             |             |             |
| CA11 CA11       | 22.91692015  | 53.70050768 |             | 73.59396899 |             |
| 70.61472638     |              |             |             |             |             |
| HCN2 HCN2       | 0            | 8.803361914 | 1.115060136 | 2.942280266 |             |
| CCDC19 CCDC19   | 60.41733494  | 31.69210289 |             | 39.02710477 |             |
| 19.61520177     |              |             |             |             |             |
| PDZD2 PDZD2     | 20.83356377  | 31.69210289 |             | 66.90360818 |             |
| 20.59596186     |              |             |             |             |             |
| AGMAT AGMAT     | 1393.765416  | 1370.68345  |             | 1339.187224 |             |
| 1306.372438     |              |             |             |             |             |
| MMRN2 MMRN2     | 0            | 0           | 3.923040355 |             |             |
| EIF3J-AS1       | EIF3J-AS1    | 241.6693398 |             | 318.6817013 |             |
| 549.7246472     | 490.3800443  |             |             |             |             |
| FAM127A FAM127A | 879.1763913  | 919.0709839 |             | 948.916176  |             |
| 1311.276239     |              |             |             |             |             |
| LOC101927416    | LOC101927416 | 4.166712755 | 0           | 0           | 0           |
| CCDC157 CCDC157 | 351.0455496  | 491.2275948 |             | 371.3150254 |             |
| 347.1890714     |              |             |             |             |             |
| ME1 ME1         | 40.62544936  | 30.8117667  |             | 0           | 60.8071255  |
| NBEAL1 NBEAL1   | 179.1686485  | 375.9035537 |             | 298.8361165 |             |
| 287.362706      |              |             |             |             |             |
| MIR637 MIR637   | 3.125034566  | 1.760672383 |             | 5.575300681 |             |
| 2.942280266     |              |             |             |             |             |

|             |             |             |             |             |             |
|-------------|-------------|-------------|-------------|-------------|-------------|
| MIR636      | MIR636      | 2873.990123 | 2045.901309 | 1926.823915 |             |
| 2140.018513 |             |             |             |             |             |
| MIR635      | MIR635      | 6.250069132 | 7.042689532 | 0           | 0.980760089 |
| MIR632      | MIR632      | 702.0910992 | 584.5432311 | 515.157783  |             |
| 565.8985712 |             |             |             |             |             |
| MIR631      | MIR631      | 3.125034566 | 4.401680957 | 3.345180409 | 0           |
| LOC401134   | LOC401134   |             | 0           | 0           | 0.980760089 |
| LINC00184   | LINC00184   |             | 0           | 3.521344766 | 0           |
| LOC389247   | LOC389247   |             | 19.79188559 | 28.17075813 |             |
| 33.45180409 | 21.57672195 |             |             |             |             |
| MIR563      | MIR563      | 0           | 0.880336191 | 0           |             |
| MIR564      | MIR564      | 50.00055306 | 47.53815434 | 69.13372845 |             |
| 58.84560532 |             |             |             |             |             |
| MIR558      | MIR558      | 2.083356377 | 0.880336191 | 0           | 0.980760089 |
| MIR555      | MIR555      | 13.54181645 | 13.20504287 | 33.45180409 |             |
| 15.69216142 |             |             |             |             |             |
| RANBP10     | RANBP10     | 2092.731481 | 2103.123161 | 1629.102859 |             |
| 1996.827541 |             |             |             |             |             |
| SLAIN2      | SLAIN2      | 3141.701417 | 3803.932683 | 3597.184    |             |
| 3149.220645 |             |             |             |             |             |
| STEAP1      | STEAP1      | 22.91692015 | 32.57243908 | 24.531323   |             |
| 15.69216142 |             |             |             |             |             |
| MRPL53      | MRPL53      | 1397.932129 | 1875.116088 | 1178.618564 |             |
| 1118.066501 |             |             |             |             |             |
| NDUFB1      | NDUFB1      | 3097.950933 | 4201.844642 | 2678.374447 |             |
| 2672.571242 |             |             |             |             |             |
| MIR718      | MIR718      | 6.250069132 | 0           | 2.230120273 | 1.961520177 |
| MIR2277     | MIR2277     | 58.33397857 | 38.73479242 | 28.99156354 |             |
| 76.49928692 |             |             |             |             |             |
| MIR2276     | MIR2276     | 12.50013826 | 9.683698106 | 5.575300681 |             |
| 6.865320621 |             |             |             |             |             |
| LMNB2       | LMNB2       | 8717.804761 | 9978.61073  | 5284.269986 |             |
| 6911.416345 |             |             |             |             |             |
| MIAT        | MIAT        | 2179.190771 | 6539.13723  | 1176.388444 |             |
| 2972.683829 |             |             |             |             |             |
| YTHDF3-AS1  | YTHDF3-AS1  |             | 28.12531109 | 49.29882672 |             |
| 16.72590204 | 23.53824213 |             |             |             |             |
| SLC10A1     | SLC10A1     | 4.166712755 | 6.16235334  | 10.03554123 |             |
| 4.903800443 |             |             |             |             |             |
| INHBA       | INHBA       | 0           | 1.760672383 | 0           |             |
| IL17A       | IL17A       | 221.8774542 | 959.5664487 | 53.52288654 |             |
| 6499.497108 |             |             |             |             |             |
| ZNF649      | ZNF649      | 536.4642672 | 594.2269292 | 710.2933068 |             |
| 805.2040328 |             |             |             |             |             |
| POLG2       | POLG2       | 718.7579502 | 474.5012072 | 677.9565628 |             |
| 656.1284993 |             |             |             |             |             |
| PROSER3     | PROSER3     | 228.1275233 | 553.7314644 | 266.4993726 |             |
| 363.8619929 |             |             |             |             |             |
| MIR1244-1   | MIR1244-1   |             | 10468.8658  | 10568.43598 |             |
| 10111.36532 | 10123.40564 |             |             |             |             |

|                 |               |             |             |             |
|-----------------|---------------|-------------|-------------|-------------|
| C17orf47        | C17orf47      | 9.375103698 | 4.401680957 |             |
| 31.22168382     | 11.76912106   |             |             |             |
| PDIA5 PDIA5     | 669.7990753   | 714.8329874 | 498.4318809 |             |
| 672.8014208     |               |             |             |             |
| LINC00942       | LINC00942     | 0           | 2.641008574 | 0           |
| DKFZp779M0652   | DKFZp779M0652 | 0           | 0           | 7.805420954 |
| 3.923040355     |               |             |             |             |
| NKAPP1 NKAPP1   | 48.95887487   | 80.11059342 | 102.5855325 |             |
| 62.76864567     |               |             |             |             |
| LOC646719       | LOC646719     | 146.8766246 | 267.6222022 |             |
| 324.4824997     | 272.6513047   |             |             |             |
| KLF3 KLF3       | 3340.661951   | 4998.548895 | 3154.505125 |             |
| 2223.383121     |               |             |             |             |
| CCDC6 CCDC6     | 1127.0958     | 1376.845803 | 1635.79322  |             |
| 1482.909254     |               |             |             |             |
| LAD1 LAD1       | 0 0           | 0           | 4.903800443 |             |
| MKL2 MKL2       | 293.7532492   | 904.9856048 | 485.0511593 |             |
| 454.0919211     |               |             |             |             |
| ASF1A ASF1A     | 9592.81444    | 5808.458191 | 8116.522732 |             |
| 4183.922538     |               |             |             |             |
| SUCLA2 SUCLA2   | 6336.528422   | 4786.387873 | 3913.861078 |             |
| 4624.283818     |               |             |             |             |
| ZZEF1 ZZEF1     | 751.0499741   | 2382.189734 | 1535.437808 |             |
| 1065.105456     |               |             |             |             |
| MIR148B MIR148B | 2.083356377   | 0           | 3.345180409 | 0           |
| MIR17HG MIR17HG | 50.00055306   | 110.9223601 | 94.78011158 |             |
| 91.21068825     |               |             |             |             |
| CCNL1 CCNL1     | 3809.417136   | 3921.897733 | 4368.805614 |             |
| 4728.244387     |               |             |             |             |
| NDUFS5 NDUFS5   | 8163.631965   | 12704.13158 | 6738.308403 |             |
| 8928.839847     |               |             |             |             |
| DOCK2 DOCK2     | 19335.63054   | 26183.83934 | 11846.39889 |             |
| 19181.70581     |               |             |             |             |
| S100A8 S100A8   | 1.041678189   | 0           | 0           | 0           |
| SLPI SLPI       | 5.208390943   | 0           | 0           | 0           |
| SLIT3 SLIT3     | 0 0.880336191 | 6.690360818 | 0           |             |
| LINC00307       | LINC00307     | 0           | 0           | 0           |
| ADAM21 ADAM21   | 3.125034566   | 0.880336191 | 17.84096218 | 0.980760089 |
| 9.807600887     |               |             |             |             |
| CLEC6A CLEC6A   | 1.041678189   | 0           | 0           | 0           |
| SMC04 SMC04     | 3025.03346    | 3324.149459 | 1349.222765 |             |
| 1899.732292     |               |             |             |             |
| SFT2D3 SFT2D3   | 325.0035949   | 401.4333033 | 420.3776714 |             |
| 407.0154368     |               |             |             |             |
| MIR553 MIR553   | 2.083356377   | 0.880336191 | 0           | 4.903800443 |
| KCNH3 KCNH3     | 50.00055306   | 134.6914373 | 210.7463658 |             |
| 244.2092621     |               |             |             |             |
| SGMS1 SGMS1     | 3802.125389   | 3779.28327  | 1955.815479 |             |
| 1976.231579     |               |             |             |             |
| LSG1 LSG1       | 5631.312288   | 4288.117588 | 5306.571188 |             |



|              |              |             |             |             |             |             |
|--------------|--------------|-------------|-------------|-------------|-------------|-------------|
| 4312.40211   |              |             |             |             |             |             |
| MIR1256      | MIR1256      | 1.041678189 | 0           | 1.115060136 | 0           |             |
| PRKCH        | PRKCH        | 21050.23284 | 18300.42875 | 14658.58055 |             |             |
| 16526.78825  |              |             |             |             |             |             |
| CYSTM1       | CYSTM1       | 723.9663411 | 836.3193819 | 1084.953513 |             |             |
| 930.7413241  |              |             |             |             |             |             |
| UNC80        | UNC80        | 1.041678189 | 1.760672383 | 0           | 0.980760089 |             |
| ACE2         | ACE2         | 1.041678189 | 0           | 0           | 0           |             |
| DDN          | DDN          | 1.041678189 | 10.5640343  | 4.460240545 |             |             |
| 5.884560532  |              |             |             |             |             |             |
| SRGAP2       | SRGAP2       | 2131.273574 | 2689.427065 | 1469.64926  |             |             |
| 1564.312341  |              |             |             |             |             |             |
| SPAG5        | SPAG5        | 15848.09196 | 15223.65376 | 6513.066256 |             |             |
| 11460.18164  |              |             |             |             |             |             |
| PMVK         | PMVK         | 5055.26425  | 3684.206961 | 3140.009344 |             |             |
| 3414.025869  |              |             |             |             |             |             |
| LOC100506384 | LOC100506384 |             | 0           | 0           | 0           | 0.980760089 |
| LOC100506472 | LOC100506472 |             | 19.79188559 | 37.85445623 |             |             |
| 14.49578177  |              |             |             |             |             |             |
| HINT2        | HINT2        | 2978.157941 | 2637.48723  | 2104.118477 |             |             |
| 2086.076709  |              |             |             |             |             |             |
| UBLCP1       | UBLCP1       | 3863.584402 | 3491.413335 | 3598.29906  |             |             |
| 3910.290474  |              |             |             |             |             |             |
| RNF5P1       | RNF5P1       | 7.291747321 | 11.44437049 | 11.15060136 |             |             |
| 11.76912106  |              |             |             |             |             |             |
| LOC90784     | LOC90784     |             | 161.4601192 | 236.8104355 |             |             |
| 141.6126373  |              |             |             |             |             |             |
| GOLGA1       | GOLGA1       | 825.0091254 | 666.4144969 | 1148.51194  |             |             |
| 1014.105932  |              |             |             |             |             |             |
| ZSCAN12P1    | ZSCAN12P1    |             | 19.79188559 | 18.48706002 |             |             |
| 28.99156354  |              |             |             |             |             |             |
| BTNL10       | BTNL10       | 0           | 0.880336191 | 12.2656615  | 5.884560532 |             |
| NPTXR        | NPTXR        | 9.375103698 | 42.25613719 | 131.5770961 |             |             |
| 65.71092594  |              |             |             |             |             |             |
| MCF2L2       | MCF2L2       | 130.2097736 | 171.6655573 | 182.8698623 |             |             |
| 155.9408541  |              |             |             |             |             |             |
| CCDC18       | CCDC18       | 702.0910992 | 1199.898229 | 451.5993552 |             |             |
| 837.5691157  |              |             |             |             |             |             |
| AS3MT        | AS3MT        | 12.50013826 | 42.25613719 | 17.84096218 |             |             |
| 28.44204257  |              |             |             |             |             |             |
| ARHGAP44     | ARHGAP44     |             | 34.37538023 | 31.69210289 |             |             |
| 45.71746559  |              |             |             |             |             |             |
| TBC1D24      | TBC1D24      | 208.3356377 | 491.2275948 | 258.6939516 |             |             |
| 262.8437038  |              |             |             |             |             |             |
| GPR141       | GPR141       | 0           | 0           | 3.345180409 | 0           |             |
| SH3GL1P2     | SH3GL1P2     |             | 4.166712755 | 2.641008574 | 0           |             |
| 0            |              |             |             |             |             |             |
| SH3GL1P1     | SH3GL1P1     |             | 6.250069132 | 53.70050768 |             |             |
| 23.41626286  |              |             |             |             |             |             |
| ATF7IP       | ATF7IP       | 5332.350648 | 5821.663234 | 10516.13215 |             |             |

|             |           |             |             |             |             |
|-------------|-----------|-------------|-------------|-------------|-------------|
| 7074.22252  |           |             |             |             |             |
| IL36G       | IL36G     | 0           | 2.641008574 | 0           | 1.961520177 |
| ANKRA2      | ANKRA2    | 1271.889068 | 995.6602325 |             | 1508.676364 |
| 1391.698566 |           |             |             |             |             |
| ZNF141      | ZNF141    | 421.8796664 | 446.3304491 |             | 909.8890712 |
| 691.4358625 |           |             |             |             |             |
| EMP3        | EMP3      | 13828.27796 | 12488.44921 |             | 6713.77708  |
| 7417.488551 |           |             |             |             |             |
| ZNF136      | ZNF136    | 864.5928966 | 941.0793886 |             | 2365.042549 |
| 1893.847731 |           |             |             |             |             |
| FUBP1       | FUBP1     | 6417.779321 | 6885.989689 |             | 6247.681943 |
| 6223.903523 |           |             |             |             |             |
| ZBTB3       | ZBTB3     | 462.5051158 | 465.6978453 |             | 566.4505492 |
| 509.014486  |           |             |             |             |             |
| MAGOHB      | MAGOHB    | 3539.622485 | 3301.260718 |             | 3635.096044 |
| 3353.218743 |           |             |             |             |             |
| AN01        | AN01      | 0           | 0           | 5.575300681 | 0           |
| TRMT12      | TRMT12    | 351.0455496 | 402.3136395 |             | 579.8312709 |
| 394.2655556 |           |             |             |             |             |
| MIR621      | MIR621    | 6.250069132 | 9.683698106 |             | 7.805420954 |
| 14.71140133 |           |             |             |             |             |
| MIR548C     | MIR548C   | 0           | 2.641008574 | 0           | 0.980760089 |
| MIR614      | MIR614    | 0           | 1.760672383 | 0           | 0           |
| MIR613      | MIR613    | 4.166712755 | 4.401680957 |             | 0           |
| MIR612      | MIR612    | 0           | 0.880336191 | 0           | 0           |
| MIR611      | MIR611    | 1084.386994 | 1152.360075 |             | 997.978822  |
| 912.1068825 |           |             |             |             |             |
| BBS10       | BBS10     | 287.5031801 | 354.7754851 |             | 793.922817  |
| 560.9947707 |           |             |             |             |             |
| PALB2       | PALB2     | 1973.980168 | 1772.99709  |             | 1779.635977 |
| 1823.233005 |           |             |             |             |             |
| MAP1S       | MAP1S     | 2565.653379 | 3179.774323 |             | 2104.118477 |
| 2748.089768 |           |             |             |             |             |
| PCDHGB6     | PCDHGB6   | 6.250069132 | 4.401680957 |             | 33.45180409 |
| 10.78836098 |           |             |             |             |             |
| GPS2        | GPS2      | 5875.064984 | 4575.987523 |             | 5335.562752 |
| 5015.607093 |           |             |             |             |             |
| ADAM2       | ADAM2     | 0           | 0           | 0           | 0.980760089 |
| SNORA5A     | SNORA5A   | 29.16698928 | 26.41008574 |             | 39.02710477 |
| 58.84560532 |           |             |             |             |             |
| SNORA71E    | SNORA71E  |             | 14.58349464 |             | 14.96571525 |
| 15.61084191 |           |             |             |             |             |
| BAHCC1      | BAHCC1    | 0           | 0.880336191 | 1.115060136 | 1.961520177 |
| LINC00158   | LINC00158 |             | 22.91692015 |             | 21.12806859 |
| 71.36384872 |           |             |             |             |             |
| RAET1K      | RAET1K    | 3.125034566 | 8.803361914 |             | 86.97469063 |
| 52.96104479 |           |             |             |             |             |
| CLUHP3      | CLUHP3    | 206.2522814 | 448.9714576 |             | 646.734879  |
| 1110.22042  |           |             |             |             |             |
| GRK5        | GRK5      | 1048.969936 | 1082.813515 |             | 479.4758586 |

|              |              |             |             |             |
|--------------|--------------|-------------|-------------|-------------|
| 743.4161472  |              |             |             |             |
| MIR1206      | MIR1206      | 0           | 3.521344766 | 5.575300681 |
| MIR1204      | MIR1204      | 161.4601192 | 57.22185244 | 180.6397421 |
| 81.40308736  |              |             |             |             |
| MIR1226      | MIR1226      | 53.12558762 | 29.93143051 | 37.91204463 |
| 27.46128248  |              |             |             |             |
| MIR1200      | MIR1200      | 0           | 0           | 2.230120273 |
| TSPAN18      | TSPAN18      | 218.7524196 | 191.0329535 | 189.5602232 |
| 201.0558182  |              |             |             |             |
| NEURL2       | NEURL2       | 16.66685102 | 16.72638764 | 79.16926967 |
| 53.94180488  |              |             |             |             |
| SACM1L       | SACM1L       | 6395.904079 | 5065.454446 | 4653.145949 |
| 5297.085239  |              |             |             |             |
| AGPS         | AGPS         | 6746.949628 | 5220.393615 | 4280.715863 |
| 5216.662912  |              |             |             |             |
| TMEM33       | TMEM33       | 5122.973332 | 5000.309567 | 4143.563466 |
| 3291.430858  |              |             |             |             |
| PLCD3        | PLCD3        | 44.79216211 | 87.15328295 | 55.75300681 |
| 91.21068825  |              |             |             |             |
| CXorf21      | CXorf21      | 1452.099395 | 1031.754016 | 675.7264426 |
| 459.9764816  |              |             |             |             |
| NKTR         | NKTR         | 2019.814008 | 2103.123161 | 2900.271414 |
| 2311.651529  |              |             |             |             |
| IRG1         | IRG1         | 1.041678189 | 0           | 0           |
| LINC00471    | LINC00471    |             | 10.41678189 | 32.57243908 |
| 45.71746559  |              | 34.3266031  |             |             |
| XXYLT1       | XXYLT1       | 708.3411683 | 522.9196977 | 700.2577656 |
| 502.1491654  |              |             |             |             |
| MAF1         | MAF1         | 8148.006792 | 7493.421662 | 8444.350412 |
| 8767.014433  |              |             |             |             |
| TERC         | TERC         | 21.87524196 | 67.78588674 | 35.68192436 |
| 17.6536816   |              |             |             |             |
| LOC100132111 | LOC100132111 |             | 592.7148894 | 631.2010493 |
| 772.7366744  |              | 1088.643698 |             |             |
| FRMD7        | FRMD7        | 0           | 0.880336191 | 0           |
| NPB          | NPB          | 10.41678189 | 9.683698106 | 2.230120273 |
| 3.923040355  |              |             |             |             |
| SPNS3        | SPNS3        | 119.7929917 | 282.5879175 | 101.4704724 |
| 210.8634191  |              |             |             |             |
| SLFNL1       | SLFNL1       | 35.41705842 | 42.25613719 | 18.95602232 |
| 13.73064124  |              |             |             |             |
| FAM106CP     | FAM106CP     |             | 0           | 5.282017149 |
| 1.961520177  |              |             |             | 0           |
| FKBP1AP1     | FKBP1AP1     |             | 16.66685102 | 23.76907717 |
| 16.72590204  |              | 14.71140133 |             |             |
| FAM83E       | FAM83E       | 3.125034566 | 6.16235334  | 10.03554123 |
| 9.807600887  |              |             |             |             |
| MYLPF        | MYLPF        | 26.04195472 | 18.48706002 | 15.61084191 |
| 11.76912106  |              |             |             |             |
| LOC100507419 | LOC100507419 |             | 595.8399239 | 696.3459274 |

|                 |             |               |               |  |
|-----------------|-------------|---------------|---------------|--|
| 336.7481612     | 444.2843202 |               |               |  |
| ERAL1 ERAL1     | 8348.009004 | 5508.26355    | 5811.69343    |  |
| 6037.559106     |             |               |               |  |
| RBM33 RBM33     | 1935.438075 | 2357.540321   | 2547.912411   |  |
| 2211.614        |             |               |               |  |
| STARD3NL        | STARD3NL    | 3731.291272   | 3060.928938   |  |
| 2706.250951     | 2874.60782  |               |               |  |
| GCNT7 GCNT7     | 26.04195472 | 38.73479242   | 41.25722504   |  |
| 36.28812328     |             |               |               |  |
| TNFRSF13C       | TNFRSF13C   | 4.166712755   | 2.641008574   |  |
| 10.03554123     | 9.807600887 |               |               |  |
| ARID3C ARID3C   | 1.041678189 | 0 16.72590204 | 2.942280266   |  |
| DEAR DEAR       | 225.0024888 | 209.5200136   | 235.2776888   |  |
| 194.1904976     |             |               |               |  |
| LINC00378       | LINC00378   | 0 0           | 0 0.980760089 |  |
| SPRN SPRN       | 172.9185793 | 163.7425316   | 88.08975076   |  |
| 191.2482173     |             |               |               |  |
| C14orf183       | C14orf183   | 6.250069132   | 14.08537906   |  |
| 11.15060136     | 12.74988115 |               |               |  |
| TSSK6 TSSK6     | 40.62544936 | 67.78588674   | 81.39938995   |  |
| 86.3068878      |             |               |               |  |
| GPR61 GPR61     | 0 0         | 7.805420954   | 0             |  |
| HMCN1 HMCN1     | 11.45846008 | 14.08537906   | 4.460240545   |  |
| 1.961520177     |             |               |               |  |
| TMPRSS6 TMPRSS6 | 148.959981  | 89.79429153   | 82.51445008   |  |
| 269.7090244     |             |               |               |  |
| TMEM155 TMEM155 | 2.083356377 | 14.96571525   | 0 9.807600887 |  |
| CUTC CUTC       | 2346.900959 | 2260.70334    | 2319.325083   |  |
| 2624.513997     |             |               |               |  |
| C3orf33 C3orf33 | 145.8349464 | 126.7684116   | 165.0289002   |  |
| 184.3828967     |             |               |               |  |
| ZNF786 ZNF786   | 688.5492827 | 692.8245827   | 1312.42578    |  |
| 942.5104452     |             |               |               |  |
| MRPL48 MRPL48   | 3433.37131  | 2041.499628   | 2449.787119   |  |
| 1946.808776     |             |               |               |  |
| BHLHE22 BHLHE22 | 3.125034566 | 2.641008574   | 0 0           |  |
| SLC25A5 SLC25A5 | 37385.83019 | 28592.43916   | 25067.66692   |  |
| 27281.80339     |             |               |               |  |
| SLC25A4 SLC25A4 | 792.7171016 | 676.098195    | 1239.946872   |  |
| 984.683129      |             |               |               |  |
| GDPGP1 GDPGP1   | 136.4598427 | 100.3583258   | 91.43493117   |  |
| 99.05676896     |             |               |               |  |
| CCDC79 CCDC79   | 0 0         | 2.230120273   | 0             |  |
| MSMP MSMP       | 289.5865365 | 382.0659071   | 378.0053862   |  |
| 318.7470288     |             |               |               |  |
| FAM102A FAM102A | 3727.124559 | 3725.582762   | 7465.327612   |  |
| 6652.495681     |             |               |               |  |
| PPP2CB PPP2CB   | 275.0030418 | 447.2107853   | 441.563814    |  |
| 166.7292151     |             |               |               |  |
| MILR1 MILR1     | 1.041678189 | 0 0           | 0             |  |

|                 |               |             |             |
|-----------------|---------------|-------------|-------------|
| MYLK2 MYLK2     | 2.083356377   | 6.16235334  | 14.49578177 |
| 2.942280266     |               |             |             |
| RBM27 RBM27     | 4463.591039   | 4084.759928 | 4623.039325 |
| 3915.194274     |               |             |             |
| 11-Sep 11-Sep   | 3477.121794   | 4430.732052 | 2569.098554 |
| 2630.398558     |               |             |             |
| LDOC1L LDOC1L   | 572.9230038   | 872.4131657 | 1529.862507 |
| 877.7802794     |               |             |             |
| FZD1 FZD1       | 26.04195472   | 78.34992104 | 25.64638313 |
| 82.38384745     |               |             |             |
| SOAT2 SOAT2     | 14.58349464   | 9.683698106 | 12.2656615  |
| 7.846080709     |               |             |             |
| ZNF282 ZNF282   | 258.3361908   | 787.0205551 | 189.5602232 |
| 334.4391902     |               |             |             |
| RPL12 RPL12     | 7039.661199   | 10792.92171 | 10400.16589 |
| 10228.34696     |               |             |             |
| BST2 BST2       | 16598.10026   | 10727.77683 | 16140.49547 |
| 9228.952434     |               |             |             |
| FER1L6 FER1L6   | 1.041678189   | 0 0         | 0           |
| SFR1 SFR1       | 933.3436571   | 879.4558552 | 897.6234097 |
| 808.1463131     |               |             |             |
| FRA10AC1        | FRA10AC1      | 677.0908227 | 772.0548399 |
| 602.1324736     | 799.3194723   |             |             |
| GEM GEM         | 76.04250777   | 81.8712658  | 122.656615  |
| 420.746078      |               |             |             |
| ZBTB7C ZBTB7C   | 39.58377117   | 29.93143051 | 40.14216491 |
| 16.67292151     |               |             |             |
| VWA5B2 VWA5B2   | 5.208390943   | 9.683698106 | 0 0         |
| PIK3CA PIK3CA   | 2272.941808   | 2949.126241 | 3429.924979 |
| 2729.455327     |               |             |             |
| PPAT PPAT       | 4658.38486    | 3347.918536 | 4062.164076 |
| 3967.174559     |               |             |             |
| FAM171A2        | FAM171A2      | 6.250069132 | 5.282017149 |
| 20.07108245     | 9.807600887   |             |             |
| SPTY2D1 SPTY2D1 | 4185.462962   | 5228.316641 | 2593.629877 |
| 2051.750105     |               |             |             |
| ZNF93 ZNF93     | 462.5051158   | 668.1751693 | 966.7571381 |
| 899.3570013     |               |             |             |
| MAP2K2 MAP2K2   | 5606.312012   | 5371.81144  | 3620.600262 |
| 4412.439639     |               |             |             |
| NRG4 NRG4       | 10.41678189   | 7.042689532 | 23.41626286 |
| 1.961520177     |               |             |             |
| BCL10 BCL10     | 2196.8993     | 1808.210537 | 2268.032317 |
| 2271.440365     |               |             |             |
| MSANTD1 MSANTD1 | 1.041678189   | 0.880336191 | 2.230120273 |
| 4.903800443     |               |             |             |
| ZNF98 ZNF98     | 0 0           | 2.230120273 | 1.961520177 |
| ZNF354C ZNF354C | 120.8346699   | 207.7593412 | 343.438522  |
| 330.5161499     |               |             |             |
| ZNF812 ZNF812   | 0 11.44437049 | 1.115060136 | 9.807600887 |

|              |              |             |             |             |
|--------------|--------------|-------------|-------------|-------------|
| OTUD1        | OTUD1        | 2709.404969 | 2940.322879 | 1724.998031 |
| 1847.752007  |              |             |             |             |
| SMAD5        | SMAD5        | 769.8001814 | 489.4669224 | 764.9312535 |
| 435.4574794  |              |             |             |             |
| TIPRL        | TIPRL        | 5762.56374  | 5311.068243 | 4106.766482 |
| 4587.995695  |              |             |             |             |
| RPUSD2       | RPUSD2       | 2133.35693  | 1533.545645 | 2182.172687 |
| 1924.251294  |              |             |             |             |
| LOC100130357 | LOC100130357 |             | 28.12531109 | 42.25613719 |
| 52.4078264   | 70.61472638  |             |             |             |
| CES5A        | CES5A        | 0           | 0           | 3.923040355 |
| GRPEL2       | GRPEL2       | 2564.611701 | 2259.823003 | 1859.920307 |
| 1727.118516  |              |             |             |             |
| TMEM263      | TMEM263      | 2317.73397  | 2957.929603 | 3354.10089  |
| 3658.235131  |              |             |             |             |
| C7orf13      | C7orf13      | 211.4606723 | 228.0070736 | 149.4180583 |
| 161.8254146  |              |             |             |             |
| ZNF784       | ZNF784       | 37.50041479 | 117.9650497 | 63.55842777 |
| 26.48052239  |              |             |             |             |
| BLVRA        | BLVRA        | 2719.821751 | 2666.538324 | 2080.702214 |
| 2471.515423  |              |             |             |             |
| ELOF1        | ELOF1        | 4617.759411 | 4277.553554 | 3262.665959 |
| 3659.215891  |              |             |             |             |
| KBTBD11      | KBTBD11      | 223.9608106 | 1529.143965 | 383.5806869 |
| 512.9375264  |              |             |             |             |
| LCN6         | LCN6         | 1.041678189 | 0           | 0           |
| PAIP2B       | PAIP2B       | 87.50096785 | 77.46958485 | 265.3843124 |
| 211.8441792  |              |             |             |             |
| TBC1D26      | TBC1D26      | 0           | 2.641008574 | 0           |
| CD3G         | CD3G         | 6060.483702 | 7157.133236 | 8.826840798 |
| 4547.784531  |              |             |             | 4821.520029 |
| MRPL12       | MRPL12       | 5434.43511  | 4358.544484 | 3548.121354 |
| 4014.251043  |              |             |             |             |
| BCHE         | BCHE         | 0           | 0.880336191 | 0           |
| POLA2        | POLA2        | 5415.684903 | 5488.015817 | 3518.01473  |
| 4773.359352  |              |             |             |             |
| EDARADD      | EDARADD      | 967.7190373 | 1599.57086  | 585.4065715 |
| 953.2988062  |              |             |             |             |
| BOC          | BOC          | 2.083356377 | 5.282017149 | 6.690360818 |
| 1.961520177  |              |             |             |             |
| ERN2         | ERN2         | 636.4653733 | 654.0897902 | 263.1541922 |
| 345.2275512  |              |             |             |             |
| EFCAB12      | EFCAB12      | 8.33342551  | 2.641008574 | 12.2656615  |
| 11.76912106  |              |             |             |             |
| HPN          | HPN          | 0           | 0.880336191 | 0           |
| ZFP14        | ZFP14        | 70.83411683 | 226.2464012 | 2.942280266 |
| 299.131827   |              |             |             | 457.1746559 |
| NHEJ1        | NHEJ1        | 2006.272191 | 1228.949323 | 1736.148632 |
| 1208.296429  |              |             |             |             |
| IGF2R        | IGF2R        | 2586.486943 | 11322.88409 | 3250.400297 |

|                 |               |             |             |  |
|-----------------|---------------|-------------|-------------|--|
| 4690.975504     |               |             |             |  |
| RGS2 RGS2       | 578.1313947   | 603.9106273 | 1171.928203 |  |
| 1008.221371     |               |             |             |  |
| RPN1 RPN1       | 29953.45632   | 25855.47394 | 24531.323   |  |
| 22317.19582     |               |             |             |  |
| KRT5 KRT5       | 1.041678189   | 0 0         | 0           |  |
| STAR STAR       | 8.33342551    | 15.84605145 | 16.72590204 |  |
| 9.807600887     |               |             |             |  |
| ANKRD27 ANKRD27 | 4432.340693   | 3869.957898 | 4433.479102 |  |
| 4285.921587     |               |             |             |  |
| LOC283070       | LOC283070     | 22.91692015 | 22.88874098 |  |
| 70.24878858     | 38.24964346   |             |             |  |
| MIR301A MIR301A | 0 2.641008574 | 0           | 0           |  |
| ZNF394 ZNF394   | 2298.983762   | 1636.54498  | 2697.33047  |  |
| 2041.942505     |               |             |             |  |
| PTPLB PTPLB     | 846.8843674   | 1411.178915 | 849.6758238 |  |
| 1046.471015     |               |             |             |  |
| LRRC39 LRRC39   | 184.3770394   | 154.9391697 | 204.0560049 |  |
| 215.7672195     |               |             |             |  |
| C10orf88        | C10orf88      | 1522.933512 | 1060.805111 |  |
| 868.6318462     | 974.8755281   |             |             |  |
| DDIAS DDIAS     | 3197.952039   | 2147.139971 | 2928.147918 |  |
| 1984.077659     |               |             |             |  |
| SNORA76C        | SNORA76C      | 12.50013826 | 10.5640343  |  |
| 3.345180409     | 2.942280266   |             |             |  |
| IQGAP1 IQGAP1   | 27203.4259    | 33823.39681 | 19348.52348 |  |
| 25334.99461     |               |             |             |  |
| APC2 APC2       | 14.58349464   | 48.41849053 | 39.02710477 |  |
| 29.42280266     |               |             |             |  |
| CRAMP1L CRAMP1L | 596.8816021   | 1488.6485   | 925.4999131 |  |
| 799.3194723     |               |             |             |  |
| ABCC4 ABCC4     | 761.4667559   | 1010.625948 | 1228.79627  |  |
| 1040.586454     |               |             |             |  |
| C19orf47        | C19orf47      | 855.2177929 | 1049.36074  |  |
| 677.9565628     | 533.5334882   |             |             |  |
| GPR22 GPR22     | 23.95859834   | 40.49546481 | 31.22168382 |  |
| 10.78836098     |               |             |             |  |
| RAB8A RAB8A     | 16727.26835   | 14349.47992 | 11238.69111 |  |
| 13282.43388     |               |             |             |  |
| GPR21 GPR21     | 0 0.880336191 | 0           | 0           |  |
| SEC11C SEC11C   | 13700.15154   | 8800.720906 | 8338.419699 |  |
| 5977.73274      |               |             |             |  |
| NT5M NT5M       | 118.7513135   | 129.4094201 | 127.1168555 |  |
| 134.3641321     |               |             |             |  |
| MRPS22 MRPS22   | 2564.611701   | 1719.296582 | 3018.467789 |  |
| 2675.513522     |               |             |             |  |
| PRTFDC1 PRTFDC1 | 48.95887487   | 102.9993344 | 37.91204463 |  |
| 50.01876452     |               |             |             |  |
| SKIV2L2 SKIV2L2 | 8495.927307   | 6659.743288 | 6068.157262 |  |
| 7078.14556      |               |             |             |  |

|             |             |             |             |             |
|-------------|-------------|-------------|-------------|-------------|
| RNLS        | RNLS        | 198.960534  | 233.2890907 | 287.6855152 |
| 235.3824213 |             |             |             |             |
| GPBAR1      | GPBAR1      | 6.250069132 | 16.72638764 | 12.2656615  |
| 8.826840798 |             |             |             |             |
| OR5H6       | OR5H6       | 1.041678189 | 0           | 0           |
| ELTD1       | ELTD1       | 0           | 0           | 1.961520177 |
| RRAGC       | RRAGC       | 254.169478  | 684.9015569 | 599.9023533 |
| 295.2087867 |             |             |             |             |
| DUS1L       | DUS1L       | 8458.426892 | 5692.253814 | 6968.010792 |
| 8258.980707 |             |             |             |             |
| NAB2        | NAB2        | 941.6770826 | 1547.631025 | 1464.073959 |
| 2108.634191 |             |             |             |             |
| SNORD15B    | SNORD15B    |             | 17.70852921 | 18.48706002 |
| 13.38072164 | 17.6536816  |             |             |             |
| SNORD62A    | SNORD62A    |             | 0           | 3.521344766 |
|             |             |             |             | 5.575300681 |
|             | 4.903800443 |             |             |             |
| SNORA47     | SNORA47     | 0           | 0           | 3.345180409 |
| SNORD63     | SNORD63     | 22.91692015 | 10.5640343  | 60.21324736 |
| 34.3266031  |             |             |             |             |
| PIP5K1P1    | PIP5K1P1    |             | 2.083356377 | 0.880336191 |
| 1.115060136 | 0.980760089 |             |             |             |
| CTSK        | CTSK        | 62.50069132 | 86.27294676 | 43.48734531 |
| 107.8836098 |             |             |             |             |
| SNORA74A    | SNORA74A    |             | 0           | 1.760672383 |
|             | 2.942280266 |             |             | 3.345180409 |
| SNORA53     | SNORA53     | 2.083356377 | 11.44437049 | 21.18614259 |
| 2.942280266 |             |             |             |             |
| SEC22A      | SEC22A      | 1981.271915 | 1673.5191   | 2303.714242 |
| 1642.773149 |             |             |             |             |
| ZSWIM6      | ZSWIM6      | 106.2511752 | 335.4080889 | 112.6210738 |
| 150.0562936 |             |             |             |             |
| IL17B       | IL17B       | 0           | 7.042689532 | 6.690360818 |
| FAM214A     | FAM214A     | 806.2589181 | 993.0192239 | 892.048109  |
| 776.7619902 |             |             |             |             |
| CTRB1       | CTRB1       | 0           | 0           | 6.690360818 |
| MTR         | MTR         | 1539.600363 | 2475.50537  | 3665.202668 |
| 3230.623732 |             |             |             |             |
| HS3ST1      | HS3ST1      | 61.45901313 | 29.05109432 | 33.45180409 |
| 23.53824213 |             |             |             |             |
| KIF5A       | KIF5A       | 22.91692015 | 57.22185244 | 55.75300681 |
| 49.03800443 |             |             |             |             |
| BRD3        | BRD3        | 1054.178327 | 1549.391697 | 2157.641364 |
| 2253.786684 |             |             |             |             |
| LGALS7      | LGALS7      | 0           | 0           | 0.980760089 |
| RPSAP58     | RPSAP58     | 453.1300121 | 127.6487478 | 459.4047761 |
| 191.2482173 |             |             |             |             |
| MANEA       | MANEA       | 1765.64453  | 2232.532581 | 1586.730574 |
| 1748.695238 |             |             |             |             |
| TMEM173     | TMEM173     | 14512.66052 | 14553.71792 | 5860.756076 |
| 9426.085212 |             |             |             |             |



|                 |               |               |               |   |
|-----------------|---------------|---------------|---------------|---|
| SYMPK SYMPK     | 2056.272744   | 2557.376636   | 2156.526304   |   |
| 887.5878802     |               |               |               |   |
| SRGAP2D SRGAP2D | 797.9254925   | 926.1136734   | 774.9667947   |   |
| 639.4555778     |               |               |               |   |
| LINC01150       | LINC01150     | 0 0           | 4.460240545   | 0 |
| SMCR8 SMCR8     | 682.2992136   | 1460.477742   | 1073.802911   |   |
| 962.125647      |               |               |               |   |
| APOA1BP APOA1BP | 4213.588273   | 3550.39586    | 3862.568312   |   |
| 4281.998547     |               |               |               |   |
| ADRB3 ADRB3     | 2.083356377   | 0 0           | 0             |   |
| RASL11B RASL11B | 22.91692015   | 11.44437049   | 81.39938995   |   |
| 16.67292151     |               |               |               |   |
| KIAA1143        | KIAA1143      | 1465.641212   | 1577.562455   |   |
| 2695.100349     | 2033.115664   |               |               |   |
| ANKRD34B        | ANKRD34B      | 0 4.401680957 | 0             | 0 |
| A1BG A1BG       | 127.084739    | 100.3583258   | 340.0933416   |   |
| 167.7099752     |               |               |               |   |
| FBX036 FBX036   | 123.9597045   | 110.9223601   | 171.719261    |   |
| 191.2482173     |               |               |               |   |
| MMAA MMAA       | 811.467309    | 693.7049189   | 753.7806521   |   |
| 1005.279091     |               |               |               |   |
| CYCS CYCS       | 25995.0792    | 17030.98396   | 21912.04674   |   |
| 18893.36235     |               |               |               |   |
| MFSD4 MFSD4     | 80.20922053   | 88.03361914   | 376.8903261   |   |
| 113.7681703     |               |               |               |   |
| TAPT1 TAPT1     | 1677.101884   | 1684.083134   | 2155.411243   |   |
| 1845.790487     |               |               |               |   |
| LIN28B LIN28B   | 1.041678189   | 0 0           | 0             |   |
| ASCL5 ASCL5     | 0 1.760672383 | 0             | 0             |   |
| TMEM18 TMEM18   | 1870.854027   | 1526.502956   | 1871.070909   |   |
| 1510.370537     |               |               |               |   |
| IKBIP IKBIP     | 2319.817326   | 1805.569529   | 1567.774552   |   |
| 1529.985738     |               |               |               |   |
| SP140L SP140L   | 2401.068225   | 2602.273782   | 2552.372652   |   |
| 2388.150816     |               |               |               |   |
| PANK1 PANK1     | 367.7124006   | 191.0329535   | 152.7632387   |   |
| 156.9216142     |               |               |               |   |
| SCARNA13        | SCARNA13      | 40.62544936   | 56.34151625   |   |
| 89.2048109      | 90.22992816   |               |               |   |
| SCARNA21        | SCARNA21      | 3.125034566   | 2.641008574   |   |
| 63.55842777     | 22.55748204   |               |               |   |
| TDGF1P3 TDGF1P3 | 0 0           | 1.115060136   | 0             |   |
| MALAT1 MALAT1   | 46942.1859    | 50673.91185   | 205214.5524   |   |
| 141234.3566     |               |               |               |   |
| RNF126P1        | RNF126P1      | 1.041678189   | 0 1.115060136 |   |
| 0               |               |               |               |   |
| CLK2P CLK2P     | 0 0           | 1.115060136   | 0             |   |
| DIXDC1 DIXDC1   | 393.7543553   | 876.8148467   | 806.1884785   |   |
| 783.6273108     |               |               |               |   |
| SNORD116-14     | SNORD116-14   | 1.041678189   | 0.880336191   |   |

|                 |              |             |             |               |
|-----------------|--------------|-------------|-------------|---------------|
| 2.230120273     | 0.980760089  |             |             |               |
| SNORD116-13     | SNORD116-13  | 0           | 0           | 1.115060136   |
| 2.942280266     |              |             |             |               |
| RSPH1 RSPH1     | 0 0          | 5.575300681 |             | 10.78836098   |
| NKG7 NKG7       | 3706.290995  | 3155.12491  |             | 2458.7076     |
| 1985.058419     |              |             |             |               |
| PIK3R6 PIK3R6   | 29.16698928  | 243.853125  |             | 23.41626286   |
| 282.4589055     |              |             |             |               |
| DSCAML1 DSCAML1 | 3.125034566  | 0           | 6.690360818 | 5.884560532   |
| DEAF1 DEAF1     | 1946.896535  | 2152.421988 |             | 1714.96249    |
| 3178.643447     |              |             |             |               |
| NDUFV2 NDUFV2   | 27765.93212  | 22414.23977 |             | 18189.976     |
| 20395.8868      |              |             |             |               |
| PRR15 PRR15     | 1.041678189  | 3.521344766 |             | 0 0           |
| SBF2 SBF2       | 152.0850156  | 122.3667306 |             | 443.7939342   |
| 501.1684053     |              |             |             |               |
| C19orf67        | C19orf67     | 3.125034566 |             | 7.042689532   |
| 17.84096218     | 3.923040355  |             |             |               |
| LOC100335030    | LOC100335030 | 7.291747321 |             | 8.803361914   |
| 4.460240545     | 6.865320621  |             |             |               |
| SYN2 SYN2       | 4.166712755  | 2.641008574 |             | 0 6.865320621 |
| NOTCH2NL        | NOTCH2NL     | 2817.7395   |             | 2631.324876   |
| 2423.025676     | 2358.728013  |             |             |               |
| MIR1238 MIR1238 | 4.166712755  | 6.16235334  |             | 0 2.942280266 |
| CACNG8 CACNG8   | 1.041678189  | 2.641008574 |             | 0 0           |
| ZZZ3 ZZZ3       | 3294.828111  | 2259.823003 |             | 4819.289909   |
| 3546.428481     |              |             |             |               |
| KLHL15 KLHL15   | 392.7126771  | 610.0729807 |             | 888.7029286   |
| 1026.855813     |              |             |             |               |
| TMEM106A        | TMEM106A     | 325.0035949 |             | 405.8349843   |
| 506.2373019     | 471.7456026  |             |             |               |
| KLHL42 KLHL42   | 1396.890451  | 1156.761756 |             | 954.4914766   |
| 948.3950057     |              |             |             |               |
| KMT2C KMT2C     | 2360.442776  | 3015.151456 |             | 4326.433329   |
| 3427.75651      |              |             |             |               |
| ADM2 ADM2       | 28.12531109  | 79.23025723 |             | 112.6210738   |
| 74.53776674     |              |             |             |               |
| DDX26B DDX26B   | 1207.305021  | 1191.975203 |             | 1249.982413   |
| 1702.599514     |              |             |             |               |
| LOC100288911    | LOC100288911 | 0 0         |             | 0 3.923040355 |
| HEXA-AS1        | HEXA-AS1     | 25.00027653 |             | 23.76907717   |
| 40.14216491     | 35.30736319  |             |             |               |
| NDUFV3 NDUFV3   | 1400.015486  | 1022.950654 |             | 1227.68121    |
| 1189.661988     |              |             |             |               |
| MIR320B2        | MIR320B2     | 0           | 2.641008574 | 0 0           |
| CLDND2 CLDND2   | 57.29230038  | 50.17916291 |             | 14.49578177   |
| 26.48052239     |              |             |             |               |
| CMTM7 CMTM7     | 6019.858252  | 7031.245161 |             | 3636.211104   |
| 4071.135128     |              |             |             |               |
| FAM71E1 FAM71E1 | 22.91692015  | 38.73479242 |             | 66.90360818   |

|                 |              |             |             |             |             |             |
|-----------------|--------------|-------------|-------------|-------------|-------------|-------------|
| 35.30736319     |              |             |             |             |             |             |
| FLJ30679        | FLJ30679     |             | 7.291747321 | 19.36739621 |             | 0           |
| 0               |              |             |             |             |             |             |
| SHC4 SHC4       | 303.1283529  |             | 934.0366991 | 189.5602232 |             |             |
| 606.1097348     |              |             |             |             |             |             |
| HADHA HADHA     | 27216.96771  |             | 18462.41061 | 15303.08531 |             |             |
| 17246.66616     |              |             |             |             |             |             |
| BMX BMX         | 0            | 1.760672383 | 1.115060136 | 0           |             |             |
| PIK3AP1 PIK3AP1 | 181.2520048  |             | 302.8356499 | 482.821039  |             |             |
| 469.7840825     |              |             |             |             |             |             |
| ITFG3 ITFG3     | 675.0074663  |             | 261.4598489 | 1499.755883 |             |             |
| 832.6653153     |              |             |             |             |             |             |
| LOC100190986    | LOC100190986 |             | 4.166712755 | 10.5640343  |             |             |
| 1.115060136     | 5.884560532  |             |             |             |             |             |
| SETD7 SETD7     | 617.7151659  |             | 1015.907965 | 1086.068573 |             |             |
| 1044.509494     |              |             |             |             |             |             |
| AKAP3 AKAP3     | 129.1680954  |             | 82.751602   | 253.1186509 |             |             |
| 107.8836098     |              |             |             |             |             |             |
| LINC01031       | LINC01031    |             | 3.125034566 | 1.760672383 |             |             |
| 3.345180409     | 1.961520177  |             |             |             |             |             |
| LOC100506127    | LOC100506127 |             | 27.08363291 | 43.13647338 |             |             |
| 92.54999131     | 45.11496408  |             |             |             |             |             |
| RNU6-16P        | RNU6-16P     |             | 0           | 0.880336191 | 0           | 0           |
| OLFML1 OLFML1   | 4.166712755  |             | 6.16235334  | 10.03554123 |             |             |
| 12.74988115     |              |             |             |             |             |             |
| ANKMY2 ANKMY2   | 1678.143562  |             | 1391.811519 | 1724.998031 |             |             |
| 1138.662463     |              |             |             |             |             |             |
| PVRIG2P PVRIG2P | 637.5070515  |             | 835.4390457 | 611.0529547 |             |             |
| 1151.412344     |              |             |             |             |             |             |
| C1orf105        | C1orf105     |             | 2.083356377 | 0           | 10.03554123 |             |
| 0.980760089     |              |             |             |             |             |             |
| EFCAB7 EFCAB7   | 542.7143363  |             | 559.8938178 | 501.7770613 |             |             |
| 477.6301632     |              |             |             |             |             |             |
| RBM43 RBM43     | 71.87579502  |             | 147.016144  | 158.3385393 |             |             |
| 98.07600887     |              |             |             |             |             |             |
| FAM89A FAM89A   | 844.801011   |             | 972.7714915 | 1015.819784 |             |             |
| 1441.71733      |              |             |             |             |             |             |
| NFATC2IP        | NFATC2IP     |             | 3252.119305 | 5064.574109 |             |             |
| 3607.219541     | 3631.754608  |             |             |             |             |             |
| ZDHHC12 ZDHHC12 | 4954.221465  |             | 4117.332367 | 2899.156354 |             |             |
| 3629.793088     |              |             |             |             |             |             |
| USP37 USP37     | 2370.859557  |             | 3076.774989 | 2874.625031 |             |             |
| 3203.16245      |              |             |             |             |             |             |
| SNORA64 SNORA64 | 102.0844625  |             | 74.82857627 | 180.6397421 |             |             |
| 131.4218519     |              |             |             |             |             |             |
| RPS26P11        | RPS26P11     |             | 0           | 0           | 0           | 1.961520177 |
| ASB9P1 ASB9P1   | 2.083356377  |             | 0           | 0           | 0           |             |
| CCNB1 CCNB1     | 21550.23837  |             | 19205.41435 | 9637.464758 |             |             |
| 13284.3954      |              |             |             |             |             |             |
| LOC101929517    | LOC101929517 |             | 2.083356377 | 0           | 0           |             |

|                 |              |             |             |             |   |  |
|-----------------|--------------|-------------|-------------|-------------|---|--|
| 1.961520177     |              |             |             |             |   |  |
| LINC01395       | LINC01395    | 0           | 0           | 35.68192436 |   |  |
| 19.61520177     |              |             |             |             |   |  |
| BRIP1 BRIP1     | 1520.850156  | 2201.720815 | 748.2053514 |             |   |  |
| 1144.547023     |              |             |             |             |   |  |
| FSIP1 FSIP1     | 27.08363291  | 44.01680957 | 32.33674395 |             |   |  |
| 30.40356275     |              |             |             |             |   |  |
| NEK8 NEK8       | 350.0038714  | 165.503204  | 511.8126025 |             |   |  |
| 373.6695938     |              |             |             |             |   |  |
| NEUROG2 NEUROG2 | 1.041678189  | 0           | 0           | 0           |   |  |
| HOXB9 HOXB9     | 3.125034566  | 7.923025723 | 12.2656615  |             |   |  |
| 2.942280266     |              |             |             |             |   |  |
| MIR4749 MIR4749 | 4.166712755  | 1.760672383 | 6.690360818 |             |   |  |
| 7.846080709     |              |             |             |             |   |  |
| MIR4748 MIR4748 | 1.041678189  | 5.282017149 | 7.805420954 |             |   |  |
| 0.980760089     |              |             |             |             |   |  |
| MIR4747 MIR4747 | 1.041678189  | 4.401680957 | 1.115060136 | 0           |   |  |
| MIR4751 MIR4751 | 9.375103698  | 20.2477324  | 21.18614259 |             |   |  |
| 26.48052239     |              |             |             |             |   |  |
| MIR4742 MIR4742 | 0            | 1.760672383 | 4.460240545 | 7.846080709 |   |  |
| LOC100507217    | LOC100507217 | 2496.902618 | 2455.257638 |             |   |  |
| 3422.119558     | 2925.607344  |             |             |             |   |  |
| NAMA NAMA       | 0            | 0           | 1.115060136 | 0           |   |  |
| HHIP-AS1        | HHIP-AS1     | 0           | 5.282017149 | 0           | 0 |  |
| RAD18 RAD18     | 3036.49192   | 2830.280855 | 2321.555204 |             |   |  |
| 2765.74345      |              |             |             |             |   |  |
| RBKS RBKS       | 382.2958953  | 206.879005  | 355.7041835 |             |   |  |
| 391.3232754     |              |             |             |             |   |  |
| MIR761 MIR761   | 60.41733494  | 62.50386959 | 39.02710477 |             |   |  |
| 53.94180488     |              |             |             |             |   |  |
| LOC284648       | LOC284648    | 3.125034566 | 0.880336191 |             |   |  |
| 2.230120273     | 10.78836098  |             |             |             |   |  |
| LOC647859       | LOC647859    | 1.041678189 | 0           | 3.345180409 |   |  |
| 0               |              |             |             |             |   |  |
| NBAS NBAS       | 1533.350294  | 2972.895318 | 1740.608873 |             |   |  |
| 2436.20806      |              |             |             |             |   |  |
| LINC00336       | LINC00336    | 1.041678189 | 2.641008574 |             |   |  |
| 7.805420954     | 6.865320621  |             |             |             |   |  |
| STK33 STK33     | 123.9597045  | 117.9650497 | 56.86806695 |             |   |  |
| 79.44156718     |              |             |             |             |   |  |
| TPRKB TPRKB     | 2345.859281  | 2516.881171 | 1710.502249 |             |   |  |
| 1894.828491     |              |             |             |             |   |  |
| PMS2L2 PMS2L2   | 118.7513135  | 108.2813515 | 81.39938995 |             |   |  |
| 102.9798093     |              |             |             |             |   |  |
| SLC9A7P1        | SLC9A7P1     | 0           | 11.44437049 | 0           |   |  |
| 5.884560532     |              |             |             |             |   |  |
| DOC2GP DOC2GP   | 10.41678189  | 12.32470668 | 22.30120273 |             |   |  |
| 15.69216142     |              |             |             |             |   |  |
| LIMD1-AS1       | LIMD1-AS1    | 273.9613636 | 776.4565208 |             |   |  |
| 389.1559876     | 437.4189995  |             |             |             |   |  |

|                |                |             |             |   |             |
|----------------|----------------|-------------|-------------|---|-------------|
| MIR630         | MIR630         | 0           | 3.521344766 | 0 | 3.923040355 |
| IER5L          | IER5L          | 12.50013826 | 25.52974955 |   | 11.15060136 |
|                |                | 37.26888337 |             |   |             |
| TEX261         | TEX261         | 4142.754156 | 4642.012737 |   | 5127.046507 |
|                |                | 4050.539166 |             |   |             |
| NEUROD4        | NEUROD4        | 2.083356377 | 0           | 0 | 0           |
| ZBTB42         | ZBTB42         | 81.25089872 | 230.6480822 |   | 165.0289002 |
|                |                | 188.305937  |             |   |             |
| TOMM40L        | TOMM40L        | 1257.305574 | 1358.358743 |   | 1171.928203 |
|                |                | 951.337286  |             |   |             |
| DOCK9-AS2      | DOCK9-AS2      |             | 16.66685102 |   | 40.49546481 |
|                |                | 65.78854804 | 67.67244612 |   |             |
| NOTCH2         | NOTCH2         | 3022.950104 | 12634.58502 |   | 5088.019402 |
|                |                | 5277.470037 |             |   |             |
| NUDT21         | NUDT21         | 13688.69308 | 12727.90066 |   | 10923.12909 |
|                |                | 11383.68235 |             |   |             |
| BLOC1S1-RDH5   | BLOC1S1-RDH5   |             | 2131.273574 |   | 2511.599154 |
|                |                | 1687.085986 | 1880.11709  |   |             |
| PFAS           | PFAS           | 5720.896612 | 6537.376558 |   | 5303.226008 |
|                |                | 7598.929167 |             |   |             |
| HESX1          | HESX1          | 1.041678189 | 9.683698106 | 0 | 8.826840798 |
| PRG2           | PRG2           | 68.75076045 | 47.53815434 |   | 79.16926967 |
|                |                | 114.7489304 |             |   |             |
| ARMCX5-GPRASP2 | ARMCX5-GPRASP2 |             | 166.6685102 |   | 167.2638764 |
|                |                | 612.1680148 | 387.400235  |   |             |
| ZNF865         | ZNF865         | 4.166712755 | 29.93143051 |   | 11.15060136 |
|                |                | 12.74988115 |             |   |             |
| RPL23          | RPL23          | 7100.078534 | 9601.82684  |   | 9218.202146 |
|                |                | 8181.50066  |             |   |             |
| ELOVL4         | ELOVL4         | 210.4189941 | 665.5341607 |   | 301.0662368 |
|                |                | 431.534439  |             |   |             |
| NUP50          | NUP50          | 12195.96823 | 10784.11835 |   | 9647.500299 |
|                |                | 9587.910627 |             |   |             |
| TUBA3C         | TUBA3C         | 5.208390943 | 0.880336191 | 0 | 7.846080709 |
| DNAJA2         | DNAJA2         | 12606.38944 | 8994.394868 |   | 10274.1641  |
|                |                | 9447.661934 |             |   |             |
| DIEXF          | DIEXF          | 2568.778413 | 1928.816595 |   | 3317.303905 |
|                |                | 3024.664113 |             |   |             |
| GRB2           | GRB2           | 17059.5637  | 16002.75129 |   | 15148.09195 |
|                |                | 16488.53861 |             |   |             |
| BCL9L          | BCL9L          | 80.20922053 | 229.767746  |   | 221.8969671 |
|                |                | 297.1703069 |             |   |             |
| TMED4          | TMED4          | 3937.543553 | 3268.688279 |   | 3907.170717 |
|                |                | 3672.946532 |             |   |             |
| ZNF678         | ZNF678         | 252.0861217 | 294.0322879 |   | 280.9951543 |
|                |                | 334.4391902 |             |   |             |
| CD300LB        | CD300LB        | 0           | 0.880336191 | 0 | 0           |
| FAR2           | FAR2           | 1187.513135 | 1007.984939 |   | 1031.430626 |
|                |                | 855.2227973 |             |   |             |
| P4HA3          | P4HA3          | 2.083356377 | 0           | 0 | 0           |

|                |                |               |               |               |
|----------------|----------------|---------------|---------------|---------------|
| TSPAN2         | TSPAN2         | 300.0033183   | 772.9351761   | 110.3909535   |
| 166.7292151    |                |               |               |               |
| PPIF           | PPIF           | 9648.023384   | 8181.844563   | 5307.686249   |
| 5658.004952    |                |               |               |               |
| MEIS1          | MEIS1          | 3.125034566   | 3.521344766   | 0 1.961520177 |
| ETF1           | ETF1           | 11298.04163   | 9454.810696   | 9007.455781   |
| 9185.79899     |                |               |               |               |
| LOC101930452   | LOC101930452   |               | 12.50013826   | 17.60672383   |
| 5.575300681    | 1.961520177    |               |               |               |
| CATSPERG       | CATSPERG       |               | 22.91692015   | 19.36739621   |
| 167.2590204    | 57.86484523    |               |               |               |
| SERINC1        | SERINC1        | 8414.676408   | 6055.832661   | 14999.78895   |
| 10025.32963    |                |               |               |               |
| KRT80          | KRT80          | 0 0           | 10.03554123   | 0             |
| KRT40          | KRT40          | 0 0           | 0 1.961520177 |               |
| CCDC38         | CCDC38         | 5.208390943   | 2.641008574   | 4.460240545   |
| 2.942280266    |                |               |               |               |
| LOC100131626   | LOC100131626   |               | 461.4634376   | 384.7069157   |
| 440.4487538    | 452.1304009    |               |               |               |
| AKAP5          | AKAP5          | 109.3762098   | 399.6726309   | 61.32830749   |
| 140.2486927    |                |               |               |               |
| GPR45          | GPR45          | 0 0.880336191 | 0             | 0             |
| NXP4           | NXP4           | 8.33342551    | 8.803361914   | 1.115060136   |
| 3.923040355    |                |               |               |               |
| CYSLTR1        | CYSLTR1        | 2177.107414   | 1662.074729   | 2608.125659   |
| 1881.09785     |                |               |               |               |
| KDELR3         | KDELR3         | 72.91747321   | 163.7425316   | 64.6734879    |
| 81.40308736    |                |               |               |               |
| NDUFS6         | NDUFS6         | 5093.806343   | 5664.963392   | 3704.229773   |
| 3922.059595    |                |               |               |               |
| ZNF32-AS1      | ZNF32-AS1      |               | 134.3764863   | 101.238662    |
| 423.7228518    | 351.1121117    |               |               |               |
| AIRN           | AIRN           | 1.041678189   | 3.521344766   | 0 0           |
| METTL21EP      | METTL21EP      |               | 0 0           | 0 0.980760089 |
| FLJ38576       | FLJ38576       |               | 11.45846008   | 17.60672383   |
| 12.2656615     | 7.846080709    |               |               |               |
| C15orf38-AP3S2 | C15orf38-AP3S2 |               | 2666.696163   | 1942.021638   |
| 2331.590745    | 2000.750581    |               |               |               |
| DNAJC27-AS1    | DNAJC27-AS1    |               | 25.00027653   | 24.64941336   |
| 139.382517     | 43.1534439     |               |               |               |
| MAPK8IP1       | MAPK8IP1       |               | 2.083356377   | 5.282017149   |
| 4.460240545    | 6.865320621    |               |               |               |
| TEX12          | TEX12          | 6.250069132   | 7.042689532   | 16.72590204   |
| 15.69216142    |                |               |               |               |
| VPS35          | VPS35          | 11293.87492   | 8483.799877   | 12028.15369   |
| 10568.67072    |                |               |               |               |
| SLC7A11        | SLC7A11        | 363.5456879   | 434.0057424   | 225.2421475   |
| 78.46080709    |                |               |               |               |
| DNAJB9         | DNAJB9         | 2223.982933   | 1516.819258   | 4629.729686   |
| 2107.653431    |                |               |               |               |

|              |              |             |             |             |             |
|--------------|--------------|-------------|-------------|-------------|-------------|
| DRG1         | DRG1         | 9708.440719 | 6782.110019 | 6645.758412 |             |
| 7086.972401  |              |             |             |             |             |
| AN05         | AN05         | 0           | 0           | 0.980760089 |             |
| P2RX6        | P2RX6        | 0           | 0           | 6.865320621 |             |
| SMARCB1      | SMARCB1      | 2870.865088 | 3488.772327 | 2094.082936 |             |
| 1914.443693  |              |             |             |             |             |
| FAM127C      | FAM127C      | 2.083356377 | 2.641008574 | 44.60240545 |             |
| 40.21116364  |              |             |             |             |             |
| FAHD2CP      | FAHD2CP      | 309.378422  | 196.3149707 | 320.0222591 |             |
| 283.4396656  |              |             |             |             |             |
| SNORD116-7   | SNORD116-7   |             | 0           | 0           | 2.230120273 |
| NECAP1       | NECAP1       | 2783.36412  | 1898.885165 | 3646.246646 | 0           |
| 2862.838699  |              |             |             |             |             |
| E2F4         | E2F4         | 8591.7617   | 7690.616968 | 6461.77349  |             |
| 7349.816104  |              |             |             |             |             |
| OXCT1        | OXCT1        | 15748.09086 | 12765.75511 | 8509.0239   |             |
| 10646.15076  |              |             |             |             |             |
| GAL3ST4      | GAL3ST4      | 23.95859834 | 21.12806859 | 214.0915462 |             |
| 99.05676896  |              |             |             |             |             |
| AGPAT5       | AGPAT5       | 4110.462133 | 3820.659071 | 4458.010425 |             |
| 4281.017787  |              |             |             |             |             |
| FBX040       | FBX040       | 28.12531109 | 17.60672383 | 33.45180409 |             |
| 25.49976231  |              |             |             |             |             |
| CRYAA        | CRYAA        | 0           | 3.521344766 | 0           |             |
| LOC100130451 | LOC100130451 |             | 2.083356377 | 0           | 1.115060136 |
| 0            |              |             |             |             |             |
| ANKRD13A     | ANKRD13A     |             | 5441.726858 | 5566.365738 |             |
| 5886.402459  | 4975.39593   |             |             |             |             |
| ZNF614       | ZNF614       | 1264.597321 | 1282.649831 | 1244.407112 |             |
| 1293.622557  |              |             |             |             |             |
| DOCK5        | DOCK5        | 4.166712755 | 35.21344766 | 8.92048109  |             |
| 19.61520177  |              |             |             |             |             |
| TMEM191A     | TMEM191A     |             | 51.04223125 | 55.46118006 |             |
| 61.32830749  | 52.96104479  |             |             |             |             |
| DSCR10       | DSCR10       | 1.041678189 | 0           | 0           | 0           |
| IQCK         | IQCK         | 286.4615019 | 254.4171593 | 347.8987625 |             |
| 355.0351521  |              |             |             |             |             |
| FAM153B      | FAM153B      | 0           | 0           | 18.95602232 | 24.51900222 |
| MYH16        | MYH16        | 4.166712755 | 2.641008574 | 7.805420954 |             |
| 3.923040355  |              |             |             |             |             |
| BRCA2        | BRCA2        | 1825.020187 | 2205.24216  | 1389.36493  |             |
| 1700.637994  |              |             |             |             |             |
| OVCH1-AS1    | OVCH1-AS1    |             | 58.33397857 | 62.50386959 |             |
| 11.15060136  | 49.03800443  |             |             |             |             |
| IER3IP1      | IER3IP1      | 4576.092283 | 3960.632525 | 4721.164617 |             |
| 4210.403061  |              |             |             |             |             |
| MOB2         | MOB2         | 1028.136372 | 1365.401433 | 1215.415549 |             |
| 1020.971252  |              |             |             |             |             |
| SLX4         | SLX4         | 196.8771777 | 582.7825587 | 276.5349138 |             |
| 235.3824213  |              |             |             |             |             |

|             |           |             |             |             |             |
|-------------|-----------|-------------|-------------|-------------|-------------|
| FBXL16      | FBXL16    | 90.62600242 | 139.9734544 | 230.8174482 |             |
| 237.3439415 |           |             |             |             |             |
| RNU6ATAC    | RNU6ATAC  |             | 0           | 2.641008574 | 0           |
| 3.923040355 |           |             |             |             |             |
| APOF        | APOF      | 7.291747321 | 8.803361914 | 6.690360818 |             |
| 5.884560532 |           |             |             |             |             |
| MIR1184-3   | MIR1184-3 |             | 405.2128154 | 410.2366652 |             |
| 473.9005579 |           | 553.14869   |             |             |             |
| LIPT2       | LIPT2     | 108.3345316 | 109.1616877 | 231.9325083 |             |
| 212.8249392 |           |             |             |             |             |
| SGK494      | SGK494    | 48.95887487 | 86.27294676 | 53.52288654 |             |
| 42.17268381 |           |             |             |             |             |
| RPS4X       | RPS4X     | 20341.89167 | 11701.42866 | 21414.72992 |             |
| 11980.96524 |           |             |             |             |             |
| UBQLN2      | UBQLN2    | 6200.068579 | 5383.255811 | 11566.51879 |             |
| 8453.171204 |           |             |             |             |             |
| NPAS2       | NPAS2     | 111.4595662 | 101.238662  | 354.5891233 |             |
| 344.2467911 |           |             |             |             |             |
| UBE2T       | UBE2T     | 6815.700389 | 6885.989689 | 4036.517693 |             |
| 5135.259824 |           |             |             |             |             |
| PHKA2       | PHKA2     | 598.9649585 | 1097.779231 | 728.134269  |             |
| 807.165553  |           |             |             |             |             |
| UBE2V2      | UBE2V2    | 9764.691341 | 7733.753442 | 6773.990328 |             |
| 7264.489977 |           |             |             |             |             |
| SIX5        | SIX5      | 13.54181645 | 15.84605145 | 5.575300681 |             |
| 24.51900222 |           |             |             |             |             |
| SIGLECL1    | SIGLECL1  |             | 11.45846008 | 0.880336191 | 0           |
| 0           |           |             |             |             |             |
| RTTN        | RTTN      | 1287.514241 | 1750.988685 | 1291.239638 |             |
| 1047.451775 |           |             |             |             |             |
| CMC2        | CMC2      | 5359.434281 | 4298.681623 | 3991.915288 |             |
| 3322.81518  |           |             |             |             |             |
| CCR4        | CCR4      | 14948.08201 | 4692.1919   | 8515.714261 |             |
| 6000.290222 |           |             |             |             |             |
| TMED2       | TMED2     | 28933.65337 | 21356.956   | 23257.92432 |             |
| 19672.08586 |           |             |             |             |             |
| LMAN2       | LMAN2     | 19412.71472 | 15050.22753 | 12729.52652 |             |
| 12674.36263 |           |             |             |             |             |
| MRC1        | MRC1      | 1.041678189 | 0           | 13.38072164 | 5.884560532 |
| SLC25A20    | SLC25A20  |             | 4957.3465   | 2350.497631 |             |
| 2627.081681 |           | 2121.384072 |             |             |             |
| STC1        | STC1      | 1.041678189 | 8.803361914 | 2.230120273 |             |
| 7.846080709 |           |             |             |             |             |
| SPDYE8P     | SPDYE8P   | 31.25034566 | 46.65781815 | 18.95602232 |             |
| 43.1534439  |           |             |             |             |             |
| UBE2Q2P1    | UBE2Q2P1  |             | 66.66740408 | 67.78588674 |             |
| 54.63794668 |           | 52.96104479 |             |             |             |
| CAND1       | CAND1     | 19404.3813  | 17213.21355 | 19609.44756 |             |
| 17714.48872 |           |             |             |             |             |
| ZC3H11A     | ZC3H11A   | 5150.056965 | 5379.734466 | 6903.337304 |             |



|                 |              |             |             |             |
|-----------------|--------------|-------------|-------------|-------------|
| 6493.612547     |              |             |             |             |
| TPTE2P1 TPTE2P1 | 3.125034566  | 0           | 0           | 0.980760089 |
| ZNF781 ZNF781   | 1.041678189  | 4.401680957 |             | 52.4078264  |
| 117.6912106     |              |             |             |             |
| ZNF488 ZNF488   | 9.375103698  | 7.923025723 |             | 15.61084191 |
| 16.67292151     |              |             |             |             |
| MMEL1 MMEL1     | 411.4628845  | 362.6985109 |             | 440.4487538 |
| 694.3781428     |              |             |             |             |
| TCTA TCTA       | 1309.389483  | 779.9778656 |             | 1578.925153 |
| 1242.623032     |              |             |             |             |
| CDC42EP1        | CDC42EP1     | 10.41678189 |             | 14.96571525 |
| 1.115060136     | 25.49976231  |             |             |             |
| SNX7 SNX7       | 2.083356377  | 15.84605145 |             | 17.84096218 |
| 6.865320621     |              |             |             |             |
| LOC100129034    | LOC100129034 | 5806.314224 |             | 4339.177088 |
| 4189.280932     | 4271.210186  |             |             |             |
| APBB3 APBB3     | 290.6282146  | 391.7496052 |             | 423.7228518 |
| 470.7648426     |              |             |             |             |
| RNF219 RNF219   | 2519.819538  | 2348.736959 |             | 2988.361165 |
| 2794.185493     |              |             |             |             |
| ABCA11P ABCA11P | 488.5470705  | 500.0309567 |             | 611.0529547 |
| 544.3218492     |              |             |             |             |
| COL4A2 COL4A2   | 0            | 5.282017149 | 0           | 0           |
| MBNL2 MBNL2     | 1640.643147  | 1629.50229  |             | 1610.146837 |
| 1719.272435     |              |             |             |             |
| ZNF445 ZNF445   | 228.1275233  | 751.8071075 |             | 491.7415201 |
| 489.3992842     |              |             |             |             |
| ADAM10 ADAM10   | 13553.27491  | 11594.02764 |             | 8561.431726 |
| 8338.422274     |              |             |             |             |
| EFHB EFHB       | 9.375103698  | 1.760672383 | 0           | 5.884560532 |
| APOBEC3F        | APOBEC3F     | 3784.41686  |             | 3464.122913 |
| 2259.111836     | 2716.705446  |             |             |             |
| RTKN2 RTKN2     | 666.6740408  | 571.3381882 |             | 956.7215969 |
| 889.5494004     |              |             |             |             |
| SLC25A43        | SLC25A43     | 464.5884722 |             | 296.6732965 |
| 666.8059615     | 550.2064097  |             |             |             |
| C8orf46 C8orf46 | 5.208390943  | 11.44437049 | 0           | 15.69216142 |
| RGAG1 RGAG1     | 0            | 0           | 0.980760089 |             |
| UBR4 UBR4       | 1997.938766  | 5086.582514 |             | 3121.053321 |
| 2815.762215     |              |             |             |             |
| MIR1279 MIR1279 | 8.33342551   | 23.76907717 |             | 17.84096218 |
| 23.53824213     |              |             |             |             |
| KIAA1715        | KIAA1715     | 1988.563662 |             | 2002.764836 |
| 1594.535995     | 1574.119942  |             |             |             |
| GSTA4 GSTA4     | 227.0858451  | 312.519348  |             | 170.6042008 |
| 319.7277889     |              |             |             |             |
| GPX8 GPX8       | 0            | 0           | 0.980760089 |             |
| KIAA1731        | KIAA1731     | 1418.765693 |             | 1828.45827  |
| 1243.292052     | 1362.275763  |             |             |             |
| ZNF571 ZNF571   | 135.4181645  | 91.55496391 |             | 641.1595784 |

|                   |               |             |             |  |
|-------------------|---------------|-------------|-------------|--|
| 306.9779078       |               |             |             |  |
| RB1 RB1           | 7124.037133   | 5864.799707 | 4388.876696 |  |
| 4262.383345       |               |             |             |  |
| ISCA2 ISCA2       | 2603.153794   | 2548.573274 | 2669.453966 |  |
| 2762.80117        |               |             |             |  |
| SNORA25 SNORA25   | 35.41705842   | 16.72638764 | 28.99156354 |  |
| 16.67292151       |               |             |             |  |
| ZCCHC12 ZCCHC12   | 0 5.282017149 | 15.61084191 | 67.67244612 |  |
| CFDP1 CFDP1       | 1257.305574   | 1229.829659 | 1291.239638 |  |
| 1287.737996       |               |             |             |  |
| ENTPD7 ENTPD7     | 760.4250777   | 809.0289599 | 556.415008  |  |
| 530.591208        |               |             |             |  |
| RNF126 RNF126     | 4101.087029   | 4404.321966 | 2652.728064 |  |
| 3387.545346       |               |             |             |  |
| CXCL17 CXCL17     | 0 0.880336191 | 0           | 3.923040355 |  |
| C18orf25 C18orf25 |               | 3110.451071 | 2661.256307 |  |
| 3540.315933       | 2976.606869   |             |             |  |
| CCDC151 CCDC151   | 1.041678189   | 1.760672383 | 20.07108245 |  |
| 1.961520177       |               |             |             |  |
| CENPBD1 CENPBD1   | 810.4256308   | 685.7818931 | 902.0836502 |  |
| 779.7042705       |               |             |             |  |
| GLS GLS           | 7994.880098   | 10426.70185 | 11684.71517 |  |
| 12807.746         |               |             |             |  |
| HERC5 HERC5       | 5221.93276    | 2859.33195  | 12345.94583 |  |
| 4691.956264       |               |             |             |  |
| ZSWIM5 ZSWIM5     | 6.250069132   | 11.44437049 | 150.5331184 |  |
| 163.7869348       |               |             |             |  |
| SIPA1L2 SIPA1L2   | 40.62544936   | 105.640343  | 98.12529199 |  |
| 136.3256523       |               |             |             |  |
| TLR5 TLR5         | 60.41733494   | 19.36739621 | 44.60240545 |  |
| 68.65320621       |               |             |             |  |
| SPPL3 SPPL3       | 1786.478094   | 1879.517769 | 2853.438889 |  |
| 2086.076709       |               |             |             |  |
| GNA11 GNA11       | 22.91692015   | 29.93143051 | 92.54999131 |  |
| 43.1534439        |               |             |             |  |
| UBTD2 UBTD2       | 616.6734877   | 722.7560132 | 616.6282554 |  |
| 708.108784        |               |             |             |  |
| FOXA3 FOXA3       | 0 0           | 1.115060136 | 2.942280266 |  |
| MMP7 MMP7         | 5.208390943   | 7.042689532 | 27.87650341 |  |
| 2.942280266       |               |             |             |  |
| DUSP5 DUSP5       | 768.7585033   | 2301.198804 | 1137.361339 |  |
| 1713.387875       |               |             |             |  |
| KPNA4 KPNA4       | 1858.353889   | 1853.107683 | 1973.656441 |  |
| 1316.180039       |               |             |             |  |
| CEBPE CEBPE       | 0 6.16235334  | 4.460240545 | 1.961520177 |  |
| ASIP ASIP         | 0 0           | 6.690360818 | 0.980760089 |  |
| ARSD ARSD         | 78.12586415   | 96.83698106 | 108.1608332 |  |
| 61.78788559       |               |             |             |  |
| ARVCF ARVCF       | 22.91692015   | 37.85445623 | 45.71746559 |  |
| 49.03800443       |               |             |             |  |

|                 |               |               |             |   |
|-----------------|---------------|---------------|-------------|---|
| CYP20A1 CYP20A1 | 2386.48473    | 2420.924526   | 2733.012394 |   |
| 2446.015661     |               |               |             |   |
| FLYWCH1 FLYWCH1 | 3272.952869   | 2581.145713   | 2495.504585 |   |
| 2270.459605     |               |               |             |   |
| ADARB2 ADARB2   | 38.54209298   | 18.48706002   | 44.60240545 |   |
| 25.49976231     |               |               |             |   |
| RPL10A RPL10A   | 8574.053171   | 10529.70119   | 9163.5642   |   |
| 9721.293999     |               |               |             |   |
| ITGAX ITGAX     | 365.6290442   | 1397.973872   | 95.89517172 |   |
| 407.9961969     |               |               |             |   |
| CTSF CTSF       | 333.3370204   | 210.4003498   | 457.1746559 |   |
| 458.0149614     |               |               |             |   |
| LINC00383       | LINC00383     | 0 0           | 3.345180409 | 0 |
| EIF1B EIF1B     | 2348.984316   | 2157.704005   | 3518.01473  |   |
| 2317.53609      |               |               |             |   |
| NR4A2 NR4A2     | 552.08944     | 522.0393615   | 1933.514276 |   |
| 4616.437737     |               |               |             |   |
| SVIP SVIP       | 1916.687867   | 2170.909048   | 2691.755169 |   |
| 2490.149865     |               |               |             |   |
| ACYP2 ACYP2     | 229.1692015   | 254.4171593   | 185.0999826 |   |
| 220.67102       |               |               |             |   |
| MALSU1 MALSU1   | 1889.604234   | 2055.585007   | 1982.576922 |   |
| 1919.347494     |               |               |             |   |
| RNF220 RNF220   | 3536.497451   | 3391.055009   | 4436.824282 |   |
| 4213.345341     |               |               |             |   |
| SLC35E1 SLC35E1 | 3922.960059   | 3430.670138   | 3495.713527 |   |
| 3358.122544     |               |               |             |   |
| ZNF703 ZNF703   | 0 2.641008574 | 0             | 0           |   |
| RPF1 RPF1       | 5428.185041   | 4666.662151   | 4957.557366 |   |
| 4935.184766     |               |               |             |   |
| PTRH2 PTRH2     | 1700.018804   | 1561.716404   | 1535.437808 |   |
| 1688.868873     |               |               |             |   |
| GLOD4 GLOD4     | 3967.752221   | 3908.69269    | 4619.694145 |   |
| 4231.979783     |               |               |             |   |
| AGBL2 AGBL2     | 82.29257691   | 112.6830325   | 84.74457036 |   |
| 143.1909729     |               |               |             |   |
| ZNF280B ZNF280B | 328.1286294   | 298.4339689   | 238.6228692 |   |
| 214.7864594     |               |               |             |   |
| LINC00242       | LINC00242     | 15.62517283   | 10.5640343  |   |
| 2.230120273     | 5.884560532   |               |             |   |
| SLC48A1 SLC48A1 | 1059.386718   | 1201.658901   | 858.5963049 |   |
| 853.2612771     |               |               |             |   |
| GIN1 GIN1       | 716.6745938   | 581.9022225   | 761.5860731 |   |
| 651.2246989     |               |               |             |   |
| LINC00278       | LINC00278     | 0 9.683698106 | 0           |   |
| 19.61520177     |               |               |             |   |
| TMEM72-AS1      | TMEM72-AS1    | 0 0           | 2.230120273 | 0 |
| ANGPTL5 ANGPTL5 | 1.041678189   | 0 3.345180409 | 0.980760089 |   |
| PPA1 PPA1       | 16517.89104   | 15472.7889    | 15532.7877  |   |
| 17032.86046     |               |               |             |   |

|              |              |             |             |             |             |
|--------------|--------------|-------------|-------------|-------------|-------------|
| PRSS53       | PRSS53       | 50.00055306 | 77.46958485 | 34.56686422 |             |
| 63.74940576  |              |             |             |             |             |
| LONRF1       | LONRF1       | 643.7571206 | 563.4151625 | 1276.743856 |             |
| 971.9332479  |              |             |             |             |             |
| GPR52        | GPR52        | 1.041678189 | 0           | 0           | 0           |
| HIST1H3B     | HIST1H3B     |             | 39.58377117 | 204.2379964 |             |
| 22.30120273  |              | 35.30736319 |             |             |             |
| MYL6B        | MYL6B        | 1673.976849 | 1934.978949 | 819.5692002 |             |
| 1197.508068  |              |             |             |             |             |
| SNAPC1       | SNAPC1       | 1205.221664 | 954.2844315 | 1397.170351 |             |
| 1405.429207  |              |             |             |             |             |
| EMX1         | EMX1         | 0           | 0.880336191 | 1.115060136 | 0.980760089 |
| GAST         | GAST         | 1.041678189 | 0           | 1.115060136 | 0           |
| LOC101928335 | LOC101928335 | 0           | 1.760672383 | 0           | 0           |
| ST13P4       | ST13P4       | 6.250069132 | 3.521344766 | 4.460240545 |             |
| 2.942280266  |              |             |             |             |             |
| NACAP1       | NACAP1       | 0           | 1.760672383 | 3.345180409 | 2.942280266 |
| PIK3R4       | PIK3R4       | 3541.705842 | 3745.830495 | 3893.789996 |             |
| 4353.594034  |              |             |             |             |             |
| TFB2M        | TFB2M        | 2770.863982 | 1703.45053  | 2293.6787   |             |
| 2065.480747  |              |             |             |             |             |
| FAM20C       | FAM20C       | 0           | 3.521344766 | 0           | 0.980760089 |
| SLN          | SLN          | 2.083356377 | 0           | 0           | 0           |
| S100A5       | S100A5       | 33.33370204 | 71.30723151 | 13.38072164 |             |
| 15.69216142  |              |             |             |             |             |
| HBA2         | HBA2         | 0           | 0           | 0.980760089 |             |
| PECAM1       | PECAM1       | 171.8769011 | 190.1526174 | 1439.542636 |             |
| 370.7273135  |              |             |             |             |             |
| LOC101928736 | LOC101928736 |             | 1010.427843 | 835.4390457 |             |
| 777.196915   |              | 991.5484496 |             |             |             |
| PHF3         | PHF3         | 2417.735076 | 3322.388786 | 5030.036275 |             |
| 3685.696413  |              |             |             |             |             |
| LOC148709    | LOC148709    |             | 12.50013826 | 11.44437049 |             |
| 11.15060136  |              | 3.923040355 |             |             |             |
| C15orf27     | C15orf27     |             | 3.125034566 | 7.923025723 | 0           |
| 0            |              |             |             |             |             |
| CYSRT1       | CYSRT1       | 14.58349464 | 18.48706002 | 28.99156354 |             |
| 11.76912106  |              |             |             |             |             |
| CLIC3        | CLIC3        | 277.0863982 | 98.59765344 | 121.5415549 |             |
| 81.40308736  |              |             |             |             |             |
| RAG2         | RAG2         | 0           | 0           | 5.884560532 |             |
| ITGA4        | ITGA4        | 32133.68876 | 33063.66668 | 9863.821965 |             |
| 10594.17048  |              |             |             |             |             |
| COL14A1      | COL14A1      | 0           | 10.5640343  | 1.115060136 | 0.980760089 |
| ACTRT3       | ACTRT3       | 72.91747321 | 76.58924866 | 57.98312709 |             |
| 39.23040355  |              |             |             |             |             |
| UBE2J2       | UBE2J2       | 5414.643225 | 3979.999921 | 3651.821946 |             |
| 3686.677173  |              |             |             |             |             |
| EXOSC3       | EXOSC3       | 5871.93995  | 4685.149211 | 4434.594162 |             |
| 4880.262201  |              |             |             |             |             |

|             |             |               |             |               |
|-------------|-------------|---------------|-------------|---------------|
| AMIG03      | AMIG03      | 69.79243864   | 171.6655573 | 62.44336763   |
| 54.92256497 |             |               |             |               |
| CCDC141     | CCDC141     | 393.7543553   | 160.2211868 | 389.1559876   |
| 184.3828967 |             |               |             |               |
| CAMSAP3     | CAMSAP3     | 10.41678189   | 103.8796706 | 4.460240545   |
| 72.57624656 |             |               |             |               |
| TBCD        | TBCD        | 5434.43511    | 5559.323049 | 4080.005039   |
| 5818.849606 |             |               |             |               |
| SLC9A3R1    | SLC9A3R1    |               | 35091.01314 | 25707.57746   |
| 11572.09409 | 13899.33198 |               |             |               |
| DSTNP2      | DSTNP2      | 142.7099119   | 94.19597248 | 56.86806695   |
| 92.19144833 |             |               |             |               |
| LOC285000   | LOC285000   |               | 0 0         | 0 0.980760089 |
| CD1A        | CD1A        | 1.041678189   | 28.17075813 | 0 21.57672195 |
| PER1        | PER1        | 269.7946509   | 794.9435809 | 916.579432    |
| 561.9755308 |             |               |             |               |
| ZNF43       | ZNF43       | 926.0519098   | 1044.078723 | 2072.896793   |
| 1424.063649 |             |               |             |               |
| ZNF264      | ZNF264      | 281.2531109   | 556.372473  | 526.3083843   |
| 492.3415645 |             |               |             |               |
| TXNDC17     | TXNDC17     | 6265.694305   | 6783.870691 | 4869.467615   |
| 5914.964095 |             |               |             |               |
| DCST2       | DCST2       | 0 3.521344766 | 7.805420954 | 2.942280266   |
| GABPB2      | GABPB2      | 602.0899931   | 490.3472586 | 545.2644066   |
| 522.7451273 |             |               |             |               |
| LRRC3       | LRRC3       | 97.91774974   | 116.2043773 | 140.4975772   |
| 103.9605694 |             |               |             |               |
| HOXC8       | HOXC8       | 0 0           | 4.460240545 | 0             |
| ZNF157      | ZNF157      | 1.041678189   | 21.12806859 | 98.12529199   |
| 35.30736319 |             |               |             |               |
| PRKCG       | PRKCG       | 0 0           | 1.115060136 | 0             |
| HIST1H2B0   | HIST1H2B0   |               | 6.250069132 | 10.5640343    |
| 5.575300681 | 3.923040355 |               |             |               |
| PAK2        | PAK2        | 6113.609289   | 9326.281612 | 5258.623603   |
| 4782.186192 |             |               |             |               |
| EIF3G       | EIF3G       | 7020.910992   | 5346.281691 | 6563.243962   |
| 6103.270032 |             |               |             |               |
| ABHD4       | ABHD4       | 1531.266937   | 994.7798963 | 2146.490762   |
| 1280.872676 |             |               |             |               |
| PYCRL       | PYCRL       | 1486.474775   | 1195.496548 | 1092.758934   |
| 1408.371487 |             |               |             |               |
| KANTR       | KANTR       | 86.45928966   | 85.39261057 | 99.24035213   |
| 89.24916807 |             |               |             |               |
| THRIL       | THRIL       | 2196.8993     | 2243.096616 | 1429.507095   |
| 1580.985263 |             |               |             |               |
| MIR645      | MIR645      | 1.041678189   | 1.760672383 | 0 0.980760089 |
| MIR644A     | MIR644A     | 0 1.760672383 | 3.345180409 | 3.923040355   |
| KRAS        | KRAS        | 4013.586061   | 6489.838403 | 4524.914033   |
| 4421.26648  |             |               |             |               |
| BRICD5      | BRICD5      | 280.2114328   | 255.2974955 | 173.9493813   |

|                 |              |             |             |             |
|-----------------|--------------|-------------|-------------|-------------|
| 191.2482173     |              |             |             |             |
| EXOC6B EXOC6B   | 415.6295973  | 219.2037117 | 332.2879206 |             |
| 276.574345      |              |             |             |             |
| FAM219A FAM219A | 103.1261407  | 318.6817013 | 124.8867353 |             |
| 93.17220842     |              |             |             |             |
| LOC100288974    | LOC100288974 | 0           | 0           | 1.115060136 |
| 1.961520177     |              |             |             |             |
| FLJ43315        | FLJ43315     | 1.041678189 | 8.803361914 |             |
| 4.460240545     | 10.78836098  |             |             |             |
| SERPINB9P1      | SERPINB9P1   | 71.87579502 | 38.73479242 |             |
| 217.4367266     | 58.84560532  |             |             |             |
| THEGL THEGL     | 0            | 1.760672383 | 2.230120273 | 0           |
| LOC100129083    | LOC100129083 | 27.08363291 | 14.96571525 |             |
| 22.30120273     | 5.884560532  |             |             |             |
| ZNF785 ZNF785   | 285.4198237  | 240.3317803 | 350.1288828 |             |
| 351.1121117     |              |             |             |             |
| ARRDC4 ARRDC4   | 33.33370204  | 34.33311147 | 60.21324736 |             |
| 70.61472638     |              |             |             |             |
| MIR671 MIR671   | 165.626832   | 231.5284183 | 131.5770961 |             |
| 179.4790962     |              |             |             |             |
| TXNDC15 TXNDC15 | 1914.604511  | 1986.918784 | 1466.304079 |             |
| 1490.755335     |              |             |             |             |
| DCAF16 DCAF16   | 938.552048   | 1113.625282 | 1539.898048 |             |
| 1166.123745     |              |             |             |             |
| TSPAN11 TSPAN11 | 0            | 0           | 4.903800443 |             |
| COL5A2 COL5A2   | 150.0016592  | 29.93143051 | 101.4704724 |             |
| 58.84560532     |              |             |             |             |
| HIST1H3H        | HIST1H3H     | 104.1678189 | 110.0420239 |             |
| 45.71746559     | 27.46128248  |             |             |             |
| HIST1H3J        | HIST1H3J     | 36.4587366  | 206.879005  |             |
| 30.10662368     | 27.46128248  |             |             |             |
| AGFG2 AGFG2     | 1788.56145   | 2326.728554 | 1573.349852 |             |
| 2320.47837      |              |             |             |             |
| RAD9A RAD9A     | 6034.441747  | 4778.464847 | 3259.320778 |             |
| 3746.503539     |              |             |             |             |
| MYH9 MYH9       | 40878.57716  | 94336.82627 | 34337.16184 |             |
| 51141.73482     |              |             |             |             |
| RHPN1 RHPN1     | 204.168925   | 401.4333033 | 237.507809  |             |
| 595.3213738     |              |             |             |             |
| PPAN PPAN       | 4574.008927  | 3309.183744 | 4129.067685 |             |
| 4910.665764     |              |             |             |             |
| HUNK HUNK       | 0            | 0           | 4.903800443 |             |
| TMEM8A TMEM8A   | 3056.283806  | 4872.66082  | 2537.87687  |             |
| 3102.14416      |              |             |             |             |
| PELO PELO       | 3202.118752  | 2348.736959 | 2365.042549 |             |
| 2200.825639     |              |             |             |             |
| C2orf15 C2orf15 | 11.45846008  | 33.45277527 | 57.98312709 |             |
| 54.92256497     |              |             |             |             |
| TUBB6 TUBB6     | 2371.901236  | 1567.878757 | 820.6842603 |             |
| 863.068878      |              |             |             |             |

|              |              |             |             |             |
|--------------|--------------|-------------|-------------|-------------|
| GNPTG        | GNPTG        | 1109.387271 | 1059.924774 | 1261.133014 |
| 1332.852961  |              |             |             |             |
| MY05C        | MY05C        | 175.0019357 | 143.4947992 | 136.0373366 |
| 186.3444168  |              |             |             |             |
| ISG15        | ISG15        | 11416.79295 | 4465.945499 | 23424.06828 |
| 6092.481671  |              |             |             |             |
| ZRSR2        | ZRSR2        | 1639.601469 | 724.5166856 | 1991.497403 |
| 971.9332479  |              |             |             |             |
| TBX6         | TBX6         | 3.125034566 | 16.72638764 | 11.15060136 |
| 19.61520177  |              |             |             |             |
| CRHBP        | CRHBP        | 0           | 0.880336191 | 0           |
| TUBB1        | TUBB1        | 81.25089872 | 102.9993344 | 140.4975772 |
| 63.74940576  |              |             |             |             |
| ARHGAP15     | ARHGAP15     |             | 7522.999879 | 7558.56654  |
| 6804.096951  | 7080.10708   |             |             |             |
| LOC100996693 | LOC100996693 | 0           | 3.521344766 | 0           |
| 0.980760089  |              |             |             |             |
| MLLT10P1     | MLLT10P1     | 0           | 13.20504287 | 7.805420954 |
| 4.903800443  |              |             |             |             |
| PVRL3-AS1    | PVRL3-AS1    | 1.041678189 | 0           | 2.230120273 |
| 0            |              |             |             |             |
| DVL3         | DVL3         | 2500.027653 | 3182.415332 | 2657.188305 |
| 2752.012809  |              |             |             |             |
| PIK3C2A      | PIK3C2A      | 1141.679295 | 1625.980946 | 1857.690187 |
| 1431.909729  |              |             |             |             |
| PRR34        | PRR34        | 64.5840477  | 80.11059342 | 141.6126373 |
| 99.05676896  |              |             |             |             |
| HMG2         | HMG2         | 61314.21986 | 41961.22456 | 38549.85903 |
| 36694.15796  |              |             |             |             |
| TMEM203      | TMEM203      | 3032.325207 | 2583.786722 | 4096.730941 |
| 3352.237983  |              |             |             |             |
| STAM         | STAM         | 3843.792516 | 2728.161857 | 2649.382884 |
| 2553.899271  |              |             |             |             |
| FRZB         | FRZB         | 0           | 0           | 0.980760089 |
| HOXB7        | HOXB7        | 64.5840477  | 57.22185244 | 31.22168382 |
| 9.807600887  |              |             |             |             |
| GTF2A2       | GTF2A2       | 10606.36732 | 8075.323884 | 7649.312535 |
| 6821.186417  |              |             |             |             |
| GABARAP      | GABARAP      | 9760.524628 | 10387.08672 | 12867.79397 |
| 9908.619176  |              |             |             |             |
| LOC101929439 | LOC101929439 | 2.083356377 |             | 4.401680957 |
| 12.2656615   | 2.942280266  |             |             |             |
| CYTIP        | CYTIP        | 23630.46971 | 18678.09297 | 20918.52816 |
| 20023.19797  |              |             |             |             |
| POTEJ        | POTEJ        | 1.041678189 | 0.880336191 | 0           |
| CCDC127      | CCDC127      | 1346.889898 | 1085.454524 | 1101.679415 |
| 1147.489304  |              |             |             |             |
| SLC25A40     | SLC25A40     |             | 2118.773436 | 2475.50537  |
| 1314.655901  | 1815.386924  |             |             |             |
| COG3         | COG3         | 1977.105202 | 1886.560458 | 2447.556999 |

|                 |               |             |               |  |
|-----------------|---------------|-------------|---------------|--|
| 2342.055092     |               |             |               |  |
| MESDC1 MESDC1   | 719.7996284   | 1301.136891 | 566.4505492   |  |
| 459.9764816     |               |             |               |  |
| PHLPP2 PHLPP2   | 591.6732112   | 1553.793378 | 1455.153478   |  |
| 1167.104506     |               |             |               |  |
| EXOSC5 EXOSC5   | 2522.944573   | 1648.869687 | 2095.197996   |  |
| 2209.65248      |               |             |               |  |
| RAB6B RAB6B     | 39.58377117   | 81.8712658  | 90.31987104   |  |
| 45.11496408     |               |             |               |  |
| CCDC70 CCDC70   | 1.041678189   | 0 0         | 0             |  |
| CCDC67 CCDC67   | 3.125034566   | 0 0         | 1.961520177   |  |
| COX7A2L COX7A2L | 6287.569547   | 5124.43697  | 6142.866291   |  |
| 5020.510894     |               |             |               |  |
| DGKI DGKI       | 143.75159     | 90.67462772 | 4.460240545   |  |
| 28.44204257     |               |             |               |  |
| EPM2AIP1        | EPM2AIP1      | 1007.302808 | 1089.856205   |  |
| 1547.703469     | 1225.950111   |             |               |  |
| MY01G MY01G     | 35844.14647   | 26853.77518 | 13426.4391    |  |
| 15685.2961      |               |             |               |  |
| DOLK DOLK       | 2030.23079    | 1264.162771 | 1670.360084   |  |
| 1318.141559     |               |             |               |  |
| DNAJC5 DNAJC5   | 885.4264604   | 1795.005494 | 1110.599896   |  |
| 794.4156718     |               |             |               |  |
| ACOT12 ACOT12   | 1.041678189   | 1.760672383 | 0 0.980760089 |  |
| MRPS15 MRPS15   | 5571.936631   | 4815.438967 | 3325.109326   |  |
| 3695.504014     |               |             |               |  |
| KLHL20 KLHL20   | 1543.767076   | 1122.428644 | 1600.111296   |  |
| 1357.371963     |               |             |               |  |
| TRIM21 TRIM21   | 7434.457233   | 4249.382796 | 9824.794861   |  |
| 6099.346991     |               |             |               |  |
| KLK14 KLK14     | 1.041678189   | 3.521344766 | 0 1.961520177 |  |
| PCOLCE2 PCOLCE2 | 0 3.521344766 | 0           | 5.884560532   |  |
| SLC16A8 SLC16A8 | 1.041678189   | 7.042689532 | 0 0           |  |
| PREP PREP       | 6117.776002   | 4682.508202 | 3805.700245   |  |
| 4183.922538     |               |             |               |  |
| BSND BSND       | 1.041678189   | 3.521344766 | 0 0           |  |
| TMEM123 TMEM123 | 16057.46928   | 15442.85747 | 29093.03402   |  |
| 18187.21508     |               |             |               |  |
| KLHL29 KLHL29   | 35.41705842   | 7.042689532 | 178.4096218   |  |
| 133.3833721     |               |             |               |  |
| SLC16A9 SLC16A9 | 411.4628845   | 275.5452279 | 114.851194    |  |
| 160.8446545     |               |             |               |  |
| SERTAD1 SERTAD1 | 1515.641765   | 1074.010154 | 2244.616054   |  |
| 1897.770772     |               |             |               |  |
| IDI1 IDI1       | 9085.517162   | 8403.689283 | 8693.008822   |  |
| 9511.41134      |               |             |               |  |
| GRIK1-AS2       | GRIK1-AS2     | 6.250069132 | 1.760672383   |  |
| 41.25722504     | 20.59596186   |             |               |  |
| LOC100133331    | LOC100133331  | 14.58349464 | 60.74319721   |  |
| 40.14216491     | 52.96104479   |             |               |  |



|                 |                |             |             |             |   |
|-----------------|----------------|-------------|-------------|-------------|---|
| LINC01001       | LINC01001      | 1.041678189 | 5.282017149 |             |   |
| 13.38072164     | 1.961520177    |             |             |             |   |
| LOC100129138    | LOC100129138   | 1.041678189 | 0           | 0           | 0 |
| LINC01002       | LINC01002      | 1.041678189 | 2.641008574 |             |   |
| 3.345180409     | 3.923040355    |             |             |             |   |
| PIGP PIGP       | 458.338403     | 563.4151625 | 489.5113998 |             |   |
| 612.9750554     |                |             |             |             |   |
| RFNG RFNG       | 294.7949274    | 623.2780235 | 321.1373192 |             |   |
| 410.9384772     |                |             |             |             |   |
| UPK2 UPK2       | 6.250069132    | 7.923025723 | 13.38072164 |             |   |
| 8.826840798     |                |             |             |             |   |
| RTEL1-TNFRSF6B  | RTEL1-TNFRSF6B | 1497.933235 | 2324.967882 |             |   |
| 1058.192069     | 1958.577897    |             |             |             |   |
| RAD50 RAD50     | 4160.462686    | 3319.747778 | 4197.086353 |             |   |
| 3816.137505     |                |             |             |             |   |
| TSPAN1 TSPAN1   | 3.125034566    | 3.521344766 | 15.61084191 |             |   |
| 6.865320621     |                |             |             |             |   |
| DBR1 DBR1       | 2387.526408    | 1941.141302 | 2934.838279 |             |   |
| 2580.379793     |                |             |             |             |   |
| ATP5F1 ATP5F1   | 22221.07912    | 17491.39979 | 17121.74839 |             |   |
| 16711.17115     |                |             |             |             |   |
| CACHD1 CACHD1   | 3.125034566    | 23.76907717 | 194.0204637 |             |   |
| 76.49928692     |                |             |             |             |   |
| RGS14 RGS14     | 2409.40165     | 1952.585673 | 2107.463658 |             |   |
| 2912.857463     |                |             |             |             |   |
| UBE2N UBE2N     | 24025.26574    | 18023.12285 | 16506.2352  |             |   |
| 17160.35927     |                |             |             |             |   |
| TM7SF3 TM7SF3   | 8234.466082    | 5752.116675 | 5069.063379 |             |   |
| 5103.875501     |                |             |             |             |   |
| C10orf11        | C10orf11       | 0           | 0           | 5.575300681 | 0 |
| FAM173A FAM173A | 461.4634376    | 461.2961643 | 566.4505492 |             |   |
| 749.3007077     |                |             |             |             |   |
| TIMELESS        | TIMELESS       | 8609.47023  | 10206.6178  |             |   |
| 5575.300681     | 7844.119189    |             |             |             |   |
| MIR1233-1       | MIR1233-1      | 1.041678189 | 0           | 0           | 0 |
| NCMAP NCMAP     | 11.45846008    | 5.282017149 | 35.68192436 |             |   |
| 16.67292151     |                |             |             |             |   |
| FOXR1 FOXR1     | 0              | 0.880336191 | 13.38072164 | 3.923040355 |   |
| PNMAL1 PNMAL1   | 0              | 11.44437049 | 0           | 10.78836098 |   |
| RNF112 RNF112   | 0              | 3.521344766 | 0           | 6.865320621 |   |
| PTPN23 PTPN23   | 166.6685102    | 477.1422158 | 471.6704376 |             |   |
| 325.6123494     |                |             |             |             |   |
| PTGDR2 PTGDR2   | 886.4681386    | 394.3906138 | 680.1866831 |             |   |
| 552.1679299     |                |             |             |             |   |
| FAM72C FAM72C   | 2761.488878    | 2551.214283 | 1468.534199 |             |   |
| 2114.518751     |                |             |             |             |   |
| MIR638 MIR638   | 15.62517283    | 16.72638764 | 8.92048109  |             |   |
| 12.74988115     |                |             |             |             |   |
| MIR590 MIR590   | 3.125034566    | 3.521344766 | 8.92048109  |             |   |
| 7.846080709     |                |             |             |             |   |

|              |              |             |             |             |             |
|--------------|--------------|-------------|-------------|-------------|-------------|
| MIR589       | MIR589       | 3.125034566 | 5.282017149 | 6.690360818 | 0           |
| MIR573       | MIR573       | 9.375103698 | 3.521344766 | 16.72590204 |             |
|              |              | 3.923040355 |             |             |             |
| MIR568       | MIR568       | 0           | 4.460240545 | 2.942280266 |             |
| SMG7-AS1     | SMG7-AS1     |             | 7.291747321 | 29.05109432 |             |
|              |              | 8.92048109  | 7.846080709 |             |             |
| DGAT2L6      | DGAT2L6      | 3.125034566 | 0.880336191 | 2.230120273 |             |
|              |              | 2.942280266 |             |             |             |
| C10orf91     | C10orf91     |             | 0           | 0.880336191 | 0           |
|              |              | 1.961520177 |             |             |             |
| C11orf53     | C11orf53     |             | 0           | 2.641008574 | 0           |
| LINC00342    | LINC00342    |             | 100.0011061 | 153.1784973 | 0           |
|              |              | 62.44336763 | 92.19144833 |             |             |
| LOC644050    | LOC644050    |             | 0           | 0.880336191 | 0           |
| LOC100128494 | LOC100128494 |             | 2152.107138 | 4756.456442 | 0           |
|              |              | 3151.159945 | 3795.541543 |             |             |
| NCAPG        | NCAPG        | 11345.95883 | 9979.491066 | 5576.415741 |             |
|              |              | 6931.031547 |             |             |             |
| RSPH3        | RSPH3        | 194.7938213 | 270.2632108 | 176.1795015 |             |
|              |              | 399.1693561 |             |             |             |
| SLC20A1      | SLC20A1      | 19214.79587 | 11668.85622 | 10853.99537 |             |
|              |              | 9825.254568 |             |             |             |
| GNAQ         | GNAQ         | 1323.972978 | 1604.852877 | 1262.248074 |             |
|              |              | 869.9341986 |             |             |             |
| MALRD1       | MALRD1       | 0           | 2.230120273 | 0.980760089 |             |
| EFHC2        | EFHC2        | 0           | 26.41008574 | 12.2656615  | 42.17268381 |
| FOXD4        | FOXD4        | 5.208390943 | 0.880336191 | 0           | 0           |
| BRF2         | BRF2         | 1008.344487 | 725.3970217 | 1361.488426 |             |
|              |              | 763.031349  |             |             |             |
| WDR34        | WDR34        | 4231.296802 | 4151.665479 | 1998.187764 |             |
|              |              | 3074.682878 |             |             |             |
| SLC24A5      | SLC24A5      | 57.29230038 | 75.70891246 | 42.37228518 |             |
|              |              | 54.92256497 |             |             |             |
| QRICH2       | QRICH2       | 62.50069132 | 66.90555055 | 34.56686422 |             |
|              |              | 75.51852683 |             |             |             |
| INTS2        | INTS2        | 2478.152411 | 3383.131984 | 2124.18956  |             |
|              |              | 2445.034901 |             |             |             |
| A3GALT2      | A3GALT2      | 0           | 0.880336191 | 0           | 0.980760089 |
| LRRN4        | LRRN4        | 2.083356377 | 0.880336191 | 26.76144327 |             |
|              |              | 6.865320621 |             |             |             |
| CCDC116      | CCDC116      | 9.375103698 | 6.16235334  | 23.41626286 |             |
|              |              | 2.942280266 |             |             |             |
| LOC100505549 | LOC100505549 |             | 184.3770394 | 189.2722812 |             |
|              |              | 241.9680496 | 206.9403787 |             |             |
| RNF212B      | RNF212B      | 25.00027653 | 44.89714576 | 44.60240545 |             |
|              |              | 51.9802847  |             |             |             |
| HCRT         | HCRT         | 2.083356377 | 4.401680957 | 0           | 4.903800443 |
| GUCY2F       | GUCY2F       | 0           | 1.115060136 | 2.942280266 |             |
| PXDN         | PXDN         | 0           | 216.5627031 | 0           | 50.01876452 |
| RPL30        | RPL30        | 7979.254925 | 11434.68679 | 13580.3174  |             |

|                             |               |               |               |  |
|-----------------------------|---------------|---------------|---------------|--|
| 11479.79684                 |               |               |               |  |
| SERTAD3 SERTAD3             | 555.2144746   | 475.3815434   | 853.0210042   |  |
| 592.3790936                 |               |               |               |  |
| ZNF225 ZNF225               | 339.5870895   | 315.1603565   | 641.1595784   |  |
| 448.2073605                 |               |               |               |  |
| SDHAF2 SDHAF2               | 3255.24434    | 3378.730303   | 3443.305701   |  |
| 2754.955089                 |               |               |               |  |
| C10orf32-ASMT C10orf32-ASMT |               | 626.0485914   | 674.3375226   |  |
| 628.8939169                 | 510.9760062   |               |               |  |
| S100A6 S100A6               | 11525.12748   | 18870.8866    | 7188.792698   |  |
| 9760.524402                 |               |               |               |  |
| QDPR QDPR                   | 2553.153241   | 1975.474414   | 2235.695573   |  |
| 2414.631338                 |               |               |               |  |
| TLR9 TLR9                   | 98.95942793   | 53.70050768   | 56.86806695   |  |
| 148.0947734                 |               |               |               |  |
| A4GALT A4GALT               | 71.87579502   | 0 7.805420954 | 0             |  |
| MIR6783 MIR6783             | 9.375103698   | 12.32470668   | 0 2.942280266 |  |
| MIR6781 MIR6781             | 68.75076045   | 69.54655912   | 89.2048109    |  |
| 74.53776674                 |               |               |               |  |
| MIR6782 MIR6782             | 0 0           | 0 0.980760089 |               |  |
| PTGDR PTGDR                 | 3.125034566   | 0 28.99156354 | 5.884560532   |  |
| SESN2 SESN2                 | 1041.678189   | 1040.557378   | 1738.378752   |  |
| 966.0486873                 |               |               |               |  |
| TMIGD2 TMIGD2               | 271.8780073   | 583.6628949   | 743.7451109   |  |
| 655.1477392                 |               |               |               |  |
| C19orf10 C19orf10           |               | 8385.509419   | 5982.764757   |  |
| 6290.054229                 | 5481.468136   |               |               |  |
| FOPNL FOPNL                 | 4064.628292   | 3681.565953   | 2734.127454   |  |
| 3308.103779                 |               |               |               |  |
| COMTD1 COMTD1               | 639.5904079   | 538.7657492   | 543.0342864   |  |
| 740.4738669                 |               |               |               |  |
| ANKRD22 ANKRD22             | 184.3770394   | 80.11059342   | 119.3114346   |  |
| 197.1327778                 |               |               |               |  |
| LAG3 LAG3                   | 7234.455021   | 11417.08007   | 3311.728605   |  |
| 7979.464081                 |               |               |               |  |
| NPR2 NPR2                   | 96.87607155   | 139.0931182   | 100.3554123   |  |
| 174.5752958                 |               |               |               |  |
| HIST1H2BL HIST1H2BL         |               | 20.83356377   | 29.05109432   |  |
| 3.345180409                 | 22.55748204   |               |               |  |
| HIST1H2BN HIST1H2BN         |               | 95.83439336   | 198.0756431   |  |
| 85.85963049                 | 91.21068825   |               |               |  |
| HIST1H2BG HIST1H2BG         |               | 17.70852921   | 35.21344766   |  |
| 18.95602232                 | 6.865320621   |               |               |  |
| HIST2H2AA3 HIST2H2AA3       |               | 1.041678189   | 7.042689532   |  |
| 2.230120273                 | 0             |               |               |  |
| NUTM2A-AS1 NUTM2A-AS1       |               | 640.632086    | 388.2282604   |  |
| 647.8499392                 | 357.9774324   |               |               |  |
| YWHAEP7 YWHAEP7             | 0 3.521344766 | 1.115060136   | 0             |  |
| PSMD4 PSMD4                 | 18588.74728   | 12799.20789   | 12735.10182   |  |
| 12666.51655                 |               |               |               |  |

|              |              |             |             |             |             |
|--------------|--------------|-------------|-------------|-------------|-------------|
| PRKCI        | PRKCI        | 2558.361631 | 2110.165851 | 2363.927489 |             |
| 2268.498085  |              |             |             |             |             |
| ANKRD36B     | ANKRD36B     |             | 1525.016868 | 1312.581261 |             |
| 1220.990849  | 1278.911156  |             |             |             |             |
| KIAA1244     | KIAA1244     |             | 13.54181645 | 29.93143051 | 0           |
|              | 29.42280266  |             |             |             |             |
| PVRL3        | PVRL3        | 34.37538023 | 208.6396774 | 47.94758586 |             |
| 87.28764789  |              |             |             |             |             |
| PMS2P4       | PMS2P4       | 169.7935448 | 154.9391697 | 98.12529199 |             |
| 164.7676949  |              |             |             |             |             |
| RXFP4        | RXFP4        | 0           | 2.641008574 | 7.805420954 | 3.923040355 |
| SNORD22      | SNORD22      | 52.08390943 | 60.74319721 | 55.75300681 |             |
| 63.74940576  |              |             |             |             |             |
| PP7080       | PP7080       | 658.3406153 | 784.3795466 | 931.0752138 |             |
| 1139.643223  |              |             |             |             |             |
| KHDRBS3      | KHDRBS3      | 50.00055306 | 20.2477324  | 12.2656615  |             |
| 15.69216142  |              |             |             |             |             |
| GID4         | GID4         | 316.6701694 | 598.6286102 | 580.946331  |             |
| 551.1871698  |              |             |             |             |             |
| PKD1L1       | PKD1L1       | 3.125034566 | 12.32470668 | 36.7969845  |             |
| 4.903800443  |              |             |             |             |             |
| LOC155060    | LOC155060    |             | 55.208944   | 82.751602   |             |
| 41.25722504  | 116.7104506  |             |             |             |             |
| LOC145474    | LOC145474    |             | 9.375103698 | 7.042689532 |             |
| 8.92048109   | 2.942280266  |             |             |             |             |
| AMY2B        | AMY2B        | 43.75048393 | 42.25613719 | 140.4975772 |             |
| 83.36460754  |              |             |             |             |             |
| OSER1        | OSER1        | 2642.737565 | 1934.098613 | 3619.485202 |             |
| 2651.97528   |              |             |             |             |             |
| PGRMC2       | PGRMC2       | 540.6309799 | 1450.794043 | 1009.129423 |             |
| 810.1078332  |              |             |             |             |             |
| MIR484       | MIR484       | 0           | 1.760672383 | 1.115060136 | 0           |
| AIG1         | AIG1         | 280.2114328 | 544.0477663 | 395.8463484 |             |
| 592.3790936  |              |             |             |             |             |
| GALNT5       | GALNT5       | 39.58377117 | 10.5640343  | 23.41626286 | 0           |
| MFI2         | MFI2         | 62.50069132 | 73.94824008 | 112.6210738 |             |
| 74.53776674  |              |             |             |             |             |
| LOC100505841 | LOC100505841 | 0           | 0           | 0           | 0.980760089 |
| TPBGL        | TPBGL        | 0           | 0.880336191 | 0           | 10.78836098 |
| MPC1L        | MPC1L        | 0           | 3.521344766 | 0           | 0           |
| MAN2A2       | MAN2A2       | 2570.86177  | 4749.413753 | 2693.985289 |             |
| 3371.853185  |              |             |             |             |             |
| DUSP8        | DUSP8        | 5.208390943 | 13.20504287 | 27.87650341 |             |
| 21.57672195  |              |             |             |             |             |
| DUSP2        | DUSP2        | 8765.721958 | 5985.405766 | 10759.21525 |             |
| 22990.978    |              |             |             |             |             |
| ELM03        | ELM03        | 15.62517283 | 48.41849053 | 33.45180409 |             |
| 39.23040355  |              |             |             |             |             |
| C2orf61      | C2orf61      | 0           | 2.641008574 | 1.115060136 | 1.961520177 |
| BTN2A3P      | BTN2A3P      | 8.33342551  | 31.69210289 | 12.2656615  |             |

|                 |               |   |               |   |               |
|-----------------|---------------|---|---------------|---|---------------|
| 50.99952461     |               |   |               |   |               |
| EN01-AS1        | EN01-AS1      |   | 93.75103698   |   | 80.99092961   |
| 171.719261      | 96.11448869   |   |               |   |               |
| STK4-AS1        | STK4-AS1      |   | 39.58377117   |   | 17.60672383   |
| 43.48734531     | 21.57672195   |   |               |   |               |
| LOC284889       | LOC284889     |   | 22061.70236   |   | 28595.08017   |
| 20634.18782     | 30263.31406   |   |               |   |               |
| C15orf39        | C15orf39      |   | 512.5056688   |   | 1404.136225   |
| 291.0306956     | 235.3824213   |   |               |   |               |
| CCR5 CCR5       | 2896.907043   |   | 3334.713493   |   | 731.4794494   |
| 1167.104506     |               |   |               |   |               |
| SLC11A1 SLC11A1 | 26.04195472   |   | 27.29042193   |   | 4.460240545   |
| 5.884560532     |               |   |               |   |               |
| ATP5B ATP5B     | 121818.0141   |   | 80232.96015   |   | 79220.56244   |
| 82932.09234     |               |   |               |   |               |
| FLJ23867        | FLJ23867      |   | 18.7502074    |   | 15.84605145   |
| 22.30120273     | 37.26888337   |   |               |   |               |
| LOC101928436    | LOC101928436  |   | 2.083356377   | 0 | 1.115060136   |
| 0               |               |   |               |   |               |
| MIR647 MIR647   | 3.125034566   |   | 9.683698106   |   | 6.690360818   |
| 5.884560532     |               |   |               |   |               |
| FRMD8P1 FRMD8P1 | 0 0           |   | 1.115060136   | 0 |               |
| AP00P5 AP00P5   | 0 0           |   | 2.230120273   | 0 |               |
| FAS-AS1 FAS-AS1 | 90.62600242   |   | 50.17916291   |   | 192.9054036   |
| 67.67244612     |               |   |               |   |               |
| PHKA2-AS1       | PHKA2-AS1     |   | 90.62600242   |   | 155.8195059   |
| 123.7716751     | 140.2486927   |   |               |   |               |
| MIR648 MIR648   | 0 0.880336191 | 0 | 0             | 0 |               |
| BRINP2 BRINP2   | 0 0           | 0 | 1.961520177   |   |               |
| TMEM55A TMEM55A | 800.0088489   |   | 654.9701264   |   | 878.6673874   |
| 855.2227973     |               |   |               |   |               |
| GYLTL1B GYLTL1B | 5.208390943   |   | 3.521344766   |   | 52.4078264    |
| 63.74940576     |               |   |               |   |               |
| SNORD116-4      | SNORD116-4    |   | 2.083356377   |   | 4.401680957   |
| 6.690360818     | 3.923040355   |   |               |   |               |
| ARHGAP26-AS1    | ARHGAP26-AS1  |   | 5.208390943   |   | 1.760672383 0 |
| 0               |               |   |               |   |               |
| LINC00941       | LINC00941     |   | 0 0.880336191 |   | 17.84096218   |
| 0               |               |   |               |   |               |
| NEAT1 NEAT1     | 629.173626    |   | 1624.220273   |   | 700.2577656   |
| 1054.317095     |               |   |               |   |               |
| TTY15 TTY15     | 0 1107.462929 | 0 | 1180.835147   |   |               |
| NCRNA00185      | NCRNA00185    | 0 | 1.760672383   | 0 |               |
| 0.980760089     |               |   |               |   |               |
| LOC643923       | LOC643923     |   | 3.125034566   |   | 0.880336191   |
| 3.345180409     | 0             |   |               |   |               |
| LOC284009       | LOC284009     |   | 10.41678189   |   | 5.282017149   |
| 43.48734531     | 21.57672195   |   |               |   |               |
| MIR16-1 MIR16-1 | 4.166712755   |   | 4.401680957   | 0 | 1.961520177   |
| MIR1972-2       | MIR1972-2     |   | 1.041678189   |   | 1.760672383 0 |

|                 |              |             |             |             |             |
|-----------------|--------------|-------------|-------------|-------------|-------------|
|                 |              | 0.980760089 |             |             |             |
| MIR1244-3       | MIR1244-3    |             | 10468.8658  |             | 10568.43598 |
| 10111.36532     | 10123.40564  |             |             |             |             |
| KCNQ5-AS1       | KCNQ5-AS1    |             | 0           | 4.401680957 | 1.115060136 |
|                 |              | 2.942280266 |             |             |             |
| MIR181A1HG      | MIR181A1HG   |             | 114.5846008 |             | 120.6060582 |
| 59.09818722     | 26.48052239  |             |             |             |             |
| MFN1 MFN1       | 1747.936001  |             | 1483.366483 |             | 1556.62395  |
| 1210.257949     |              |             |             |             |             |
| C19orf33        | C19orf33     |             | 7.291747321 |             | 9.683698106 |
| 44.60240545     | 11.76912106  |             |             |             |             |
| ARHGAP18        | ARHGAP18     |             | 863.5512184 |             | 681.3802122 |
| 574.2559702     | 585.5137729  |             |             |             |             |
| MYBL2 MYBL2     | 21440.86216  |             | 21303.2555  |             | 7795.385413 |
| 12076.09897     |              |             |             |             |             |
| FAM32A FAM32A   | 10893.8705   |             | 8641.380055 |             | 7153.110774 |
| 7072.260999     |              |             |             |             |             |
| SOX4 SOX4       | 364.587366   |             | 2220.207875 |             | 166.1439603 |
| 533.5334882     |              |             |             |             |             |
| SOX2 SOX2       | 0            | 7.042689532 | 4.460240545 |             | 0           |
| CX3CL1 CX3CL1   | 1.041678189  | 0           | 0           |             | 0           |
| SORL1 SORL1     | 1756.269426  |             | 2601.393446 |             | 6330.196394 |
| 6566.188794     |              |             |             |             |             |
| NDUFB7 NDUFB7   | 3377.120688  |             | 3197.381047 |             | 2544.567231 |
| 2825.569815     |              |             |             |             |             |
| KCNMB1 KCNMB1   | 27.08363291  |             | 22.88874098 |             | 0           |
| TMA7 TMA7       | 10794.91107  |             | 9717.150881 |             | 5.884560532 |
| 8743.47619      |              |             |             |             | 9444.559354 |
| EMP1 EMP1       | 482.2970014  |             | 980.6945173 |             | 229.7023881 |
| 707.1280239     |              |             |             |             |             |
| RPL29 RPL29     | 16011.63544  |             | 15740.4111  |             | 15711.19732 |
| 15790.23743     |              |             |             |             |             |
| AVIL AVIL       | 87.50096785  |             | 94.19597248 |             | 152.7632387 |
| 101.0182891     |              |             |             |             |             |
| EIF1B-AS1       | EIF1B-AS1    |             | 80.20922053 |             | 46.65781815 |
| 108.1608332     | 82.38384745  |             |             |             |             |
| PXN-AS1 PXN-AS1 | 939.5937262  |             | 900.5839238 |             | 774.9667947 |
| 695.3589029     |              |             |             |             |             |
| LOC100134317    | LOC100134317 |             | 1.041678189 |             | 0           |
| 0.980760089     |              |             |             |             | 0           |
| KCNQ1 KCNQ1     | 177.0852921  |             | 323.9637184 |             | 401.4216491 |
| 622.7826563     |              |             |             |             |             |
| TMEM56-RWDD3    | TMEM56-RWDD3 |             | 442.7132302 |             | 410.2366652 |
| 343.438522      | 494.3030847  |             |             |             |             |
| NOTUM NOTUM     | 4.166712755  |             | 17.60672383 |             | 8.92048109  |
| 21.57672195     |              |             |             |             |             |
| DTX3 DTX3       | 134.3764863  |             | 331.006408  |             | 390.2710477 |
| 317.7662687     |              |             |             |             |             |
| CCDC114 CCDC114 | 10.41678189  |             | 24.64941336 |             | 0           |
| RIBC2 RIBC2     | 129.1680954  |             | 106.5206792 |             | 8.826840798 |
|                 |              |             |             |             | 127.1168555 |

|                 |               |               |               |  |
|-----------------|---------------|---------------|---------------|--|
| 105.9220896     |               |               |               |  |
| KIAA1279        | KIAA1279      | 2538.569746   | 2311.762839   |  |
| 1973.656441     | 2273.401886   |               |               |  |
| SCARNA9L        | SCARNA9L      | 21.87524196   | 13.20504287   |  |
| 45.71746559     | 4.903800443   |               |               |  |
| SRSF4 SRSF4     | 11830.33919   | 9933.713584   | 8704.159424   |  |
| 9076.934621     |               |               |               |  |
| FAM133DP        | FAM133DP      | 985.4275665   | 917.3103115   |  |
| 929.9601536     | 920.9337233   |               |               |  |
| RAX RAX         | 1.041678189   | 0.880336191   | 0 0           |  |
| PSMB1 PSMB1     | 28995.11238   | 24334.253     | 24186.76942   |  |
| 22529.04        |               |               |               |  |
| PSMA7 PSMA7     | 33861.83288   | 27994.69089   | 24047.3869    |  |
| 24503.31006     |               |               |               |  |
| PSMA2 PSMA2     | 33329.53533   | 26545.65752   | 23460.86527   |  |
| 22028.85235     |               |               |               |  |
| SPATA3-AS1      | SPATA3-AS1    | 92.70935879   | 103.8796706   |  |
| 23.41626286     | 26.48052239   |               |               |  |
| NUMA1 NUMA1     | 5301.100302   | 12234.03205   | 8454.385953   |  |
| 9602.622028     |               |               |               |  |
| TECTA TECTA     | 20.83356377   | 6.16235334    | 37.91204463   |  |
| 8.826840798     |               |               |               |  |
| PURB PURB       | 869.8012876   | 1271.20546    | 1229.91133    |  |
| 1020.971252     |               |               |               |  |
| ANKRD13B        | ANKRD13B      | 45.8338403    | 95.07630868   |  |
| 39.02710477     | 107.8836098   |               |               |  |
| LSM12 LSM12     | 4417.757198   | 3242.278193   | 3449.996062   |  |
| 3360.084064     |               |               |               |  |
| SPATA32 SPATA32 | 34.37538023   | 41.375801     | 79.16926967   |  |
| 78.46080709     |               |               |               |  |
| CCDC13 CCDC13   | 13.54181645   | 3.521344766   | 16.72590204   |  |
| 11.76912106     |               |               |               |  |
| LOC102723439    | LOC102723439  | 61.45901313   | 30.8117667    |  |
| 52.4078264      | 47.07648426   |               |               |  |
| LMOD1 LMOD1     | 0 0.880336191 | 8.92048109    | 0             |  |
| CLCA4 CLCA4     | 1.041678189   | 0 0           | 0             |  |
| LOC101927901    | LOC101927901  | 1.041678189   | 2.641008574   |  |
| 1.115060136     | 0             |               |               |  |
| LOC101927620    | LOC101927620  | 26.04195472   | 14.96571525   |  |
| 49.062646       | 36.28812328   |               |               |  |
| CELSR3 CELSR3   | 213.5440287   | 640.8847474   | 489.5113998   |  |
| 425.6498785     |               |               |               |  |
| FBX017 FBX017   | 2.083356377   | 3.521344766   | 0 5.884560532 |  |
| WFDC5 WFDC5     | 0 1.760672383 | 0 0           | 0             |  |
| SPRYD4 SPRYD4   | 495.8388178   | 420.8006995   | 555.2999479   |  |
| 635.5325375     |               |               |               |  |
| ZNF467 ZNF467   | 1.041678189   | 0 35.68192436 | 14.71140133   |  |
| KBTBD12 KBTBD12 | 0 0           | 0 0.980760089 |               |  |
| ERICH1 ERICH1   | 981.2608538   | 1079.292171   | 1073.802911   |  |
| 984.683129      |               |               |               |  |

|             |             |             |             |             |
|-------------|-------------|-------------|-------------|-------------|
| VPS25       | VPS25       | 4768.802748 | 4235.297417 | 3311.728605 |
| 3292.411618 |             |             |             |             |
| PBDC1       | PBDC1       | 3252.119305 | 2462.300327 | 3150.044885 |
| 2921.684304 |             |             |             |             |
| IP04        | IP04        | 4982.346777 | 3013.390783 | 4955.327246 |
| 4923.415645 |             |             |             |             |
| OR3A4P      | OR3A4P      | 0           | 0.880336191 | 0           |
| 1.961520177 |             |             |             |             |
| PMS2P1      | PMS2P1      | 1695.852091 | 1881.278441 | 1595.651055 |
| 2023.308063 |             |             |             |             |
| ZBTB26      | ZBTB26      | 138.5431991 | 165.503204  | 70.24878858 |
| 171.6330155 |             |             |             |             |
| AP5M1       | AP5M1       | 5331.30897  | 3992.324628 | 4882.848337 |
| 4348.690233 |             |             |             |             |
| EFCAB6      | EFCAB6      | 7.291747321 | 4.401680957 | 21.18614259 |
| 24.51900222 |             |             |             |             |
| NAA15       | NAA15       | 6820.90878  | 5959.876016 | 6943.479469 |
| 5801.195924 |             |             |             |             |
| SPAG7       | SPAG7       | 4638.592974 | 3436.832491 | 3484.562926 |
| 3480.717555 |             |             |             |             |
| CTTNBP2NL   | CTTNBP2NL   |             | 145.8349464 | 215.6823669 |
| 238.6228692 | 272.6513047 |             |             |             |
| USPL1       | USPL1       | 1655.226642 | 1667.356747 | 2688.409989 |
| 1872.271009 |             |             |             |             |
| SAMHD1      | SAMHD1      | 21210.65128 | 11590.5063  | 13892.53424 |
| 8207.000422 |             |             |             |             |
| RRP1B       | RRP1B       | 6583.406153 | 7512.789058 | 7833.297457 |
| 6956.531309 |             |             |             |             |
| CST3        | CST3        | 17.70852921 | 24.64941336 | 31.22168382 |
| 14.71140133 |             |             |             |             |
| TOLLIP-AS1  | TOLLIP-AS1  |             | 29.16698928 | 22.00840479 |
| 17.84096218 | 9.807600887 |             |             |             |
| STAB2       | STAB2       | 6.250069132 | 4.401680957 | 27.87650341 |
| 13.73064124 |             |             |             |             |
| NDUFAF6     | NDUFAF6     | 1290.639276 | 1068.728136 | 1325.806502 |
| 1141.604743 |             |             |             |             |
| POU5F1P4    | POU5F1P4    |             | 19.79188559 | 8.803361914 |
| 44.60240545 | 18.63444168 |             |             |             |
| ZNF702P     | ZNF702P     | 32.29202385 | 32.57243908 | 641.1595784 |
| 240.2862217 |             |             |             |             |
| ABCA17P     | ABCA17P     | 2.083356377 | 23.76907717 | 5.575300681 |
| 17.6536816  |             |             |             |             |
| BCRP3       | BCRP3       | 4.166712755 | 18.48706002 | 0           |
| 9.807600887 |             |             |             |             |
| UOX         | UOX         | 0           | 1.115060136 | 0           |
| 0           |             |             |             |             |
| GUCY1B2     | GUCY1B2     | 2.083356377 | 0           | 0           |
| 0           |             |             |             |             |
| MIR98       | MIR98       | 3.125034566 | 3.521344766 | 5.575300681 |
| 5.884560532 |             |             |             |             |
| LINC00312   | LINC00312   |             | 1.041678189 | 0           |
| 0           |             |             |             | 0           |
| HSPA12A     | HSPA12A     | 1.041678189 | 2.641008574 | 0           |
| 0           |             |             |             | 9.807600887 |
| KRTAP5-AS1  | KRTAP5-AS1  | 0           | 0           | 0           |
| 0           |             |             |             | 0.980760089 |
| SUZ12P1     | SUZ12P1     | 92.70935879 | 222.7250564 | 139.382517  |



|                 |              |               |               |  |
|-----------------|--------------|---------------|---------------|--|
| 143.1909729     |              |               |               |  |
| LOC100131691    | LOC100131691 | 148.959981    | 125.8880754   |  |
| 206.2861252     | 164.7676949  |               |               |  |
| ZNF217 ZNF217   | 622.9235568  | 1344.273364   | 1134.016159   |  |
| 684.5705419     |              |               |               |  |
| DYNLT3 DYNLT3   | 1131.262513  | 831.0373647   | 3690.849051   |  |
| 2302.824688     |              |               |               |  |
| VTRNA1-2        | VTRNA1-2     | 1.041678189   | 1.760672383   |  |
| 5.575300681     | 0            |               |               |  |
| EGOT EGOT       | 10.41678189  | 11.44437049   | 17.84096218   |  |
| 7.846080709     |              |               |               |  |
| SEC1P SEC1P     | 10.41678189  | 24.64941336   | 40.14216491   |  |
| 37.26888337     |              |               |               |  |
| RFXAP RFXAP     | 385.4209298  | 606.5516359   | 439.3336937   |  |
| 411.9192372     |              |               |               |  |
| IFNAR1 IFNAR1   | 3931.293484  | 3424.507785   | 4631.959806   |  |
| 3874.98311      |              |               |               |  |
| TPST1 TPST1     | 137.5015209  | 99.47798963   | 198.4807043   |  |
| 116.7104506     |              |               |               |  |
| TTF2 TTF2       | 4530.258443  | 5435.195646   | 3463.376783   |  |
| 4417.343439     |              |               |               |  |
| FAAHP1 FAAHP1   | 4.166712755  | 2.641008574   | 0 31.38432284 |  |
| HIF1A-AS2       | HIF1A-AS2    | 2038.564215   | 3540.712162   |  |
| 3465.606904     | 5429.487851  |               |               |  |
| MFSD3 MFSD3     | 417.7129537  | 382.9462433   | 302.1812969   |  |
| 392.3040355     |              |               |               |  |
| LGALSL LGALSL   | 161.4601192  | 171.6655573   | 149.4180583   |  |
| 160.8446545     |              |               |               |  |
| TPT1-AS1        | TPT1-AS1     | 178.1269703   | 211.2806859   |  |
| 192.9054036     | 309.920188   |               |               |  |
| LINC00654       | LINC00654    | 1.041678189   | 0 1.115060136 |  |
| 1.961520177     |              |               |               |  |
| WEE2-AS1        | WEE2-AS1     | 19.79188559   | 8.803361914   |  |
| 10.03554123     | 14.71140133  |               |               |  |
| LINC00667       | LINC00667    | 1115.63734    | 925.2333372   |  |
| 1513.136605     | 1240.661512  |               |               |  |
| LOC100126784    | LOC100126784 | 0 5.282017149 | 7.805420954   |  |
| 5.884560532     |              |               |               |  |
| CD27-AS1        | CD27-AS1     | 2880.240192   | 4495.87693    |  |
| 2167.676905     | 4536.99617   |               |               |  |
| TP53TG1 TP53TG1 | 455.2133685  | 540.5264215   | 520.7330836   |  |
| 521.7643672     |              |               |               |  |
| A1BG-AS1        | A1BG-AS1     | 288.5448583   | 242.0924526   |  |
| 342.3234618     | 293.2472665  |               |               |  |
| ZNF674-AS1      | ZNF674-AS1   | 210.4189941   | 130.2897563   |  |
| 137.1523968     | 177.517576   |               |               |  |
| PAX8-AS1        | PAX8-AS1     | 483.3386796   | 1528.263628   |  |
| 587.6366918     | 1777.137281  |               |               |  |
| MIR4323 MIR4323 | 0 0          | 0 0.980760089 |               |  |
| LINC00200       | LINC00200    | 0 0.880336191 | 0             |  |

|               |               |               |               |               |
|---------------|---------------|---------------|---------------|---------------|
| 0.980760089   |               |               |               |               |
| VLDLR-AS1     | VLDLR-AS1     | 22.91692015   | 7.042689532   |               |
| 14.49578177   | 7.846080709   |               |               |               |
| LINC01128     | LINC01128     | 766.6751469   | 638.2437388   |               |
| 1112.830016   | 1020.971252   |               |               |               |
| SNHG17        | SNHG17        | 1048.969936   | 826.6356838   | 1147.39688    |
| 1276.949635   |               |               |               |               |
| GLIDR         | GLIDR         | 181.2520048   | 106.5206792   | 148.3029981   |
| 86.3068878    |               |               |               |               |
| NPHS1         | NPHS1         | 2.083356377   | 1.760672383   | 0 0.980760089 |
| RNF20         | RNF20         | 2998.991505   | 2772.178667   | 2913.652136   |
| 3207.08549    |               |               |               |               |
| HCFC1         | HCFC1         | 1859.395567   | 5482.7338     | 2709.596131   |
| 2454.842502   |               |               |               |               |
| NPBWR1        | NPBWR1        | 0 0           | 3.345180409   | 5.884560532   |
| RAC3          | RAC3          | 1.041678189   | 26.41008574   | 0 4.903800443 |
| TXLNB         | TXLNB         | 10.41678189   | 23.76907717   | 55.75300681   |
| 29.42280266   |               |               |               |               |
| ROCK2         | ROCK2         | 2000.022122   | 2205.24216    | 2499.964826   |
| 2220.440841   |               |               |               |               |
| KL            | KL            | 52.08390943   | 22.00840479   | 33.45180409   |
| 34.3266031    |               |               |               |               |
| LOC283692     | LOC283692     | 0 0           | 3.345180409   |               |
| 0.980760089   |               |               |               |               |
| LOC441081     | LOC441081     | 2.083356377   | 0 3.345180409 |               |
| 0             |               |               |               |               |
| EDC4          | EDC4          | 9184.47659    | 10784.99868   | 8311.658256   |
| 9410.393051   |               |               |               |               |
| GATC          | GATC          | 11808.46395   | 9728.595252   | 8538.015463   |
| 9912.542216   |               |               |               |               |
| TMEM246       | TMEM246       | 2.083356377   | 8.803361914   | 0 8.826840798 |
| CAPNS2        | CAPNS2        | 0 1.760672383 | 0 0           |               |
| DKFZP434I0714 | DKFZP434I0714 | 148.959981    | 181.3492554   |               |
| 120.4264947   | 217.7287397   |               |               |               |
| INGX          | INGX          | 1.041678189   | 10.5640343    | 10.03554123   |
| 19.61520177   |               |               |               |               |
| ITPKA         | ITPKA         | 158.3350847   | 358.2968299   | 17.84096218   |
| 103.9605694   |               |               |               |               |
| ABCB6         | ABCB6         | 2214.607829   | 1422.623285   | 981.2529199   |
| 1225.950111   |               |               |               |               |
| KMO           | KMO           | 883.343104    | 885.6182086   | 653.4252399   |
| 710.0703042   |               |               |               |               |
| SLC6A16       | SLC6A16       | 30.20866747   | 44.01680957   | 54.63794668   |
| 50.99952461   |               |               |               |               |
| CECR7         | CECR7         | 47.91719668   | 27.29042193   | 59.09818722   |
| 35.30736319   |               |               |               |               |
| GPR82         | GPR82         | 104.1678189   | 88.91395534   | 66.90360818   |
| 52.96104479   |               |               |               |               |
| CHD6          | CHD6          | 625.0069132   | 952.5237591   | 1060.42219    |
| 969.9717277   |               |               |               |               |

|                 |              |             |             |             |   |
|-----------------|--------------|-------------|-------------|-------------|---|
| FLJ16779        | FLJ16779     | 0           | 0.880336191 | 0           | 0 |
| NCBP2-AS2       | NCBP2-AS2    | 2471.902342 |             | 2023.012568 |   |
| 2356.122068     | 2252.805924  |             |             |             |   |
| C16orf91        | C16orf91     | 1446.891004 |             | 1006.224267 |   |
| 1411.666133     | 1231.834671  |             |             |             |   |
| STRAP STRAP     | 13255.35495  | 12071.16986 |             | 11102.65378 |   |
| 11478.81608     |              |             |             |             |   |
| HMOX1 HMOX1     | 4029.211234  | 1537.06699  |             | 1105.024595 |   |
| 475.668643      |              |             |             |             |   |
| HLA-DRB5        | HLA-DRB5     | 819.8007345 |             | 5901.773827 |   |
| 228.5873279     | 1347.564362  |             |             |             |   |
| PTENP1 PTENP1   | 10.41678189  | 3.521344766 |             | 8.92048109  |   |
| 9.807600887     |              |             |             |             |   |
| UBA6-AS1        | UBA6-AS1     | 431.2547701 |             | 463.0568367 |   |
| 565.3354891     | 421.7268381  |             |             |             |   |
| ADPRHL2 ADPRHL2 | 3967.752221  | 2554.735628 |             | 4043.208054 |   |
| 3629.793088     |              |             |             |             |   |
| 5-Mar 5-Mar     | 3253.160983  | 3053.005912 |             | 2543.452171 |   |
| 2478.380744     |              |             |             |             |   |
| LOC101927354    | LOC101927354 | 12.50013826 |             | 14.08537906 |   |
| 23.41626286     | 10.78836098  |             |             |             |   |
| CLEC18B CLEC18B | 3.125034566  | 1.760672383 |             | 2.230120273 |   |
| 4.903800443     |              |             |             |             |   |
| COLGALT1        | COLGALT1     | 4601.092559 |             | 4061.871187 |   |
| 3732.106276     | 4855.743199  |             |             |             |   |
| COX5A COX5A     | 15174.12617  | 15257.10653 |             | 11074.77727 |   |
| 10788.36098     |              |             |             |             |   |
| SLC22A4 SLC22A4 | 36.4587366   | 36.97412004 |             | 74.70902913 |   |
| 85.32612771     |              |             |             |             |   |
| RYK RYK         | 417.7129537  | 390.869269  |             | 1655.864302 |   |
| 1220.06555      |              |             |             |             |   |
| GOLGA8R GOLGA8R | 0 0          | 0           | 1.961520177 |             |   |
| XXYLT1-AS2      | XXYLT1-AS2   | 38.54209298 |             | 41.375801   |   |
| 42.37228518     | 22.55748204  |             |             |             |   |
| RAB44 RAB44     | 4.166712755  | 3.521344766 |             | 5.575300681 |   |
| 0.980760089     |              |             |             |             |   |
| LOC727896       | LOC727896    | 11.45846008 |             | 12.32470668 |   |
| 22.30120273     | 35.30736319  |             |             |             |   |
| ALMS1 ALMS1     | 214.5857069  | 640.8847474 |             | 539.689106  |   |
| 411.9192372     |              |             |             |             |   |
| SUGP1 SUGP1     | 2373.984592  | 2092.559127 |             | 1939.089577 |   |
| 2155.710675     |              |             |             |             |   |
| TNNC2 TNNC2     | 3.125034566  | 9.683698106 |             | 12.2656615  |   |
| 4.903800443     |              |             |             |             |   |
| AP3S1 AP3S1     | 2298.983762  | 1802.92852  |             | 3008.432248 |   |
| 2533.303309     |              |             |             |             |   |
| QPCT QPCT       | 236.4609488  | 72.1875677  |             | 389.1559876 |   |
| 203.9980984     |              |             |             |             |   |
| CHAF1B CHAF1B   | 4134.420731  | 3650.754186 |             | 2213.39437  |   |
| 2989.35675      |              |             |             |             |   |

|              |              |             |             |             |
|--------------|--------------|-------------|-------------|-------------|
| TLR6         | TLR6         | 76.04250777 | 100.3583258 | 13.38072164 |
| 45.11496408  |              |             |             |             |
| KIAA0753     | KIAA0753     | 707.2994901 | 823.9946752 |             |
| 851.9059441  | 712.0318244  |             |             |             |
| DHRS7B       | DHRS7B       | 1909.39612  | 1128.590997 | 1357.028186 |
| 1100.412819  |              |             |             |             |
| KIAA0754     | KIAA0754     | 21.87524196 | 95.95664487 |             |
| 23.41626286  | 34.3266031   |             |             |             |
| SLC38A7      | SLC38A7      | 871.8846439 | 668.1751693 | 721.4439082 |
| 817.9539139  |              |             |             |             |
| MOB1A        | MOB1A        | 13183.47916 | 12128.39171 | 10635.44358 |
| 10505.90207  |              |             |             |             |
| C1QL4        | C1QL4        | 0           | 0.880336191 | 0           |
| TNNI1        | TNNI1        | 2.083356377 | 0           | 0.980760089 |
| NUDC         | NUDC         | 16499.14083 | 11246.29485 | 14097.7053  |
| 14014.08091  |              |             |             |             |
| HPGDS        | HPGDS        | 388.5459644 | 176.0672383 | 39.02710477 |
| 47.07648426  |              |             |             |             |
| BMP10        | BMP10        | 2.083356377 | 9.683698106 | 0           |
| MIR874       | MIR874       | 0           | 0           | 4.903800443 |
| IKZF5        | IKZF5        | 2055.231066 | 1642.707333 | 5.884560532 |
| 2425.419699  |              |             |             | 3609.449661 |
| SCARNA6      | SCARNA6      | 0           | 0.880336191 | 0.980760089 |
| HIATL2       | HIATL2       | 480.213645  | 422.5613719 | 516.2728431 |
| 401.1308763  |              |             |             |             |
| POP7         | POP7         | 3757.333227 | 2878.699346 | 2833.367806 |
| 2757.897369  |              |             |             |             |
| PIP4K2A      | PIP4K2A      | 2644.820921 | 5228.316641 | 2972.750323 |
| 3166.874326  |              |             |             |             |
| MIR6730      | MIR6730      | 7.291747321 | 4.401680957 | 2.230120273 |
| 2.942280266  |              |             |             |             |
| ANKK1        | ANKK1        | 0           | 0           | 6.690360818 |
| MED19        | MED19        | 1054.178327 | 804.627279  | 12.74988115 |
| 903.2800417  |              |             |             | 1074.917971 |
| MEA1         | MEA1         | 5859.439811 | 4608.559962 | 5497.246472 |
| 5859.06077   |              |             |             |             |
| LOC101927572 | LOC101927572 | 128.1264172 | 106.5206792 |             |
| 85.85963049  | 111.8066501  |             |             |             |
| PARVA        | PARVA        | 6.250069132 | 0           | 6.690360818 |
| ZNF224       | ZNF224       | 859.3845057 | 778.2171932 | 9.807600887 |
| 1145.527784  |              |             |             | 1537.667928 |
| CEP350       | CEP350       | 3114.617784 | 3959.752189 | 4815.944729 |
| 3542.50544   |              |             |             |             |
| LOC100129931 | LOC100129931 | 3142.743095 | 4876.182164 |             |
| 2831.137686  | 3079.586678  |             |             |             |
| DDX11-AS1    | DDX11-AS1    | 68.75076045 | 56.34151625 |             |
| 63.55842777  | 50.01876452  |             |             |             |
| PRKAG2-AS1   | PRKAG2-AS1   | 22.91692015 | 25.52974955 |             |
| 100.3554123  | 98.07600887  |             |             |             |
| LOC100288181 | LOC100288181 | 2.083356377 | 0           | 1.115060136 |

|              |              |             |             |             |             |
|--------------|--------------|-------------|-------------|-------------|-------------|
| 2.942280266  |              |             |             |             |             |
| LINC00886    | LINC00886    |             | 56.25062219 | 113.5633687 |             |
| 42.37228518  | 25.49976231  |             |             |             |             |
| LINC01125    | LINC01125    |             | 13.54181645 | 11.44437049 |             |
| 20.07108245  | 8.826840798  |             |             |             |             |
| LOC643770    | LOC643770    |             | 5.208390943 | 20.2477324  |             |
| 10.03554123  | 22.55748204  |             |             |             |             |
| TSC22D1-AS1  | TSC22D1-AS1  |             | 4.166712755 | 5.282017149 |             |
| 32.33674395  | 23.53824213  |             |             |             |             |
| SLC7A11-AS1  | SLC7A11-AS1  |             | 26.04195472 | 36.09378385 |             |
| 32.33674395  | 8.826840798  |             |             |             |             |
| LOC100128993 | LOC100128993 |             | 1.041678189 | 16.72638764 | 0           |
| 16.67292151  |              |             |             |             |             |
| DNAJC9-AS1   | DNAJC9-AS1   |             | 42.70880574 | 39.61512861 |             |
| 57.98312709  | 36.28812328  |             |             |             |             |
| SASH3        | SASH3        | 26611.75269 | 18671.05028 | 9780.192455 |             |
| 14306.34741  |              |             |             |             |             |
| RPS2P32      | RPS2P32      | 102.0844625 | 92.4353001  | 60.21324736 |             |
| 86.3068878   |              |             |             |             |             |
| ZNF300P1     | ZNF300P1     | 0           | 1.760672383 | 0           |             |
| 3.923040355  |              |             |             |             |             |
| PRSS30P      | PRSS30P      | 23.95859834 | 18.48706002 | 30.10662368 |             |
| 26.48052239  |              |             |             |             |             |
| ULK4P1       | ULK4P1       | 0           | 2.641008574 | 0           | 0           |
| BAIAP2-AS1   | BAIAP2-AS1   | 0           | 24.64941336 | 20.07108245 |             |
| 24.51900222  |              |             |             |             |             |
| LINC00265    | LINC00265    |             | 388.5459644 | 435.7664148 |             |
| 262.039132   | 385.4387148  |             |             |             |             |
| LOC401127    | LOC401127    |             | 1.041678189 | 3.521344766 | 0           |
| 0            |              |             |             |             |             |
| SPATA31D5P   | SPATA31D5P   | 0           | 0.880336191 | 0           | 0           |
| LOC91450     | LOC91450     |             | 4.166712755 | 2.641008574 | 0           |
| 2.942280266  |              |             |             |             |             |
| LOC285074    | LOC285074    |             | 1228.138584 | 1427.024966 |             |
| 1032.545686  | 1081.778378  |             |             |             |             |
| MIR1249      | MIR1249      | 0           | 1.760672383 | 0           | 0           |
| DBH-AS1      | DBH-AS1      | 0           | 0           | 32.33674395 | 27.46128248 |
| LBX2-AS1     | LBX2-AS1     |             | 39.58377117 | 53.70050768 |             |
| 10.03554123  | 27.46128248  |             |             |             |             |
| HCAR2        | HCAR2        | 14.58349464 | 0.880336191 | 0           | 0           |
| SNORA1       | SNORA1       | 8.33342551  | 7.923025723 | 6.690360818 |             |
| 6.865320621  |              |             |             |             |             |
| PDRG1        | PDRG1        | 2259.399991 | 1649.750023 | 2010.453426 |             |
| 1909.539893  |              |             |             |             |             |
| FMN2         | FMN2         | 0           | 0.880336191 | 0           | 0           |
| NUAK2        | NUAK2        | 135.4181645 | 351.2541404 | 2213.39437  |             |
| 1419.159848  |              |             |             |             |             |
| ALG10        | ALG10        | 492.7137833 | 460.4158281 | 287.6855152 |             |
| 338.3622306  |              |             |             |             |             |
| LINC01185    | LINC01185    |             | 1.041678189 | 0           | 0           |

|                 |              |             |             |             |             |
|-----------------|--------------|-------------|-------------|-------------|-------------|
| 3.923040355     |              |             |             |             |             |
| CMAHP CMAHP     | 9353.228456  | 8011.939678 | 4425.673681 |             |             |
| 5050.914457     |              |             |             |             |             |
| ZNF503-AS2      | ZNF503-AS2   | 0           | 2.641008574 | 0           |             |
| 0.980760089     |              |             |             |             |             |
| LINC00937       | LINC00937    | 1.041678189 | 0           | 0           |             |
| 0.980760089     |              |             |             |             |             |
| SCAMP2 SCAMP2   | 7604.250777  | 7371.935267 | 6603.386127 |             |             |
| 6354.344614     |              |             |             |             |             |
| PDCD7 PDCD7     | 1217.721803  | 1349.555381 | 1248.867353 |             |             |
| 1355.410443     |              |             |             |             |             |
| LINC00870       | LINC00870    | 0           | 0           | 0           | 0.980760089 |
| ASNA1 ASNA1     | 6064.650415  | 4643.77341  | 4315.282727 |             |             |
| 4072.115888     |              |             |             |             |             |
| SERINC3 SERINC3 | 12262.63564  | 11546.48949 | 13565.82162 |             |             |
| 12276.17403     |              |             |             |             |             |
| LOC101929125    | LOC101929125 | 14.58349464 | 36.09378385 |             |             |
| 4.460240545     | 7.846080709  |             |             |             |             |
| ZFP3 ZFP3       | 59.37565676  | 82.751602   | 449.3692349 |             |             |
| 246.1707823     |              |             |             |             |             |
| LOC100133985    | LOC100133985 | 15.62517283 | 34.33311147 |             |             |
| 14.49578177     | 15.69216142  |             |             |             |             |
| LOC100133920    | LOC100133920 | 0           | 0.880336191 | 0           | 0           |
| CIR1 CIR1       | 1195.846561  | 1090.736541 | 1893.372111 |             |             |
| 1406.409967     |              |             |             |             |             |
| GLI2 GLI2       | 1.041678189  | 0           | 0           | 0           |             |
| MYOM2 MYOM2     | 702.0910992  | 591.5859206 | 216.3216664 |             |             |
| 399.1693561     |              |             |             |             |             |
| EID1 EID1       | 9963.651875  | 11445.25082 | 6426.091565 |             |             |
| 9207.375712     |              |             |             |             |             |
| HCG11 HCG11     | 167.7101884  | 277.3059003 | 408.1120099 |             |             |
| 279.5166253     |              |             |             |             |             |
| FOXD2-AS1       | FOXD2-AS1    | 40.62544936 | 184.8706002 |             |             |
| 24.531323       | 41.19192372  |             |             |             |             |
| MIR5680 MIR5680 | 0            | 0.880336191 | 0           | 0           |             |
| MIR548AV        | MIR548AV     | 0           | 0.880336191 | 0           | 0           |
| NUP160 NUP160   | 12294.92766  | 12144.23776 | 11410.41037 |             |             |
| 12427.21108     |              |             |             |             |             |
| TTC30B TTC30B   | 164.5851538  | 121.4863944 | 230.8174482 |             |             |
| 129.4603317     |              |             |             |             |             |
| HCAR3 HCAR3     | 6.250069132  | 0           | 0           | 0           |             |
| HS6ST1 HS6ST1   | 807.3005962  | 950.7630868 | 733.7095697 |             |             |
| 793.4349117     |              |             |             |             |             |
| SH2B2 SH2B2     | 40.62544936  | 114.4437049 | 24.531323   |             |             |
| 65.71092594     |              |             |             |             |             |
| CCL14 CCL14     | 0            | 0           | 0           | 0.980760089 |             |
| MIR374C MIR374C | 11.45846008  | 12.32470668 | 2.230120273 |             |             |
| 11.76912106     |              |             |             |             |             |
| MIR3945 MIR3945 | 1.041678189  | 0           | 0           | 0           |             |
| MIR3944 MIR3944 | 1.041678189  | 0           | 0           | 2.942280266 |             |

|              |              |             |             |             |
|--------------|--------------|-------------|-------------|-------------|
| SETD2        | SETD2        | 2282.316911 | 4382.313561 | 4116.802023 |
| 3452.275512  |              |             |             |             |
| PIK3C2B      | PIK3C2B      | 126.0430608 | 600.3892826 | 205.1710651 |
| 374.6503539  |              |             |             |             |
| CHRM1        | CHRM1        | 6.250069132 | 0           | 0.980760089 |
| SSC4D        | SSC4D        | 59.37565676 | 68.66622293 | 47.94758586 |
| 90.22992816  |              |             |             |             |
| DENND6A      | DENND6A      | 858.3428275 | 1367.162105 | 1108.369775 |
| 953.2988062  |              |             |             |             |
| SIAH2        | SIAH2        | 11000.12167 | 13249.05968 | 6990.311994 |
| 10552.97855  |              |             |             |             |
| SFPQ         | SFPQ         | 30102.4163  | 28762.34405 | 22226.4937  |
| 25612.54972  |              |             |             |             |
| CHRM3        | CHRM3        | 3.125034566 | 4.401680957 | 0           |
| BLVRB        | BLVRB        | 595.8399239 | 670.8161779 | 0.980760089 |
| 1085.701418  |              |             |             | 1187.539045 |
| SAYSD1       | SAYSD1       | 868.7596094 | 670.8161779 | 1200.919767 |
| 1055.297855  |              |             |             |             |
| BRIX1        | BRIX1        | 7146.954053 | 4712.439633 | 6610.076488 |
| 6111.116112  |              |             |             |             |
| TBKBP1       | TBKBP1       | 9.375103698 | 101.238662  | 49.062646   |
| 110.82589    |              |             |             |             |
| DOCK4        | DOCK4        | 15.62517283 | 25.52974955 | 1.115060136 |
| 16.67292151  |              |             |             |             |
| LOC100133091 | LOC100133091 |             | 153.1266937 | 226.2464012 |
| 236.3927489  | 214.7864594  |             |             |             |
| MIR767       | MIR767       | 0           | 0           | 0.980760089 |
| LOC389765    | LOC389765    |             | 50.00055306 | 84.51227438 |
| 181.7548022  | 101.9990492  |             |             |             |
| GPR160       | GPR160       | 147.9183028 | 231.5284183 | 276.5349138 |
| 262.8437038  |              |             |             |             |
| RNF11        | RNF11        | 1397.932129 | 1494.810853 | 2070.666673 |
| 1458.390252  |              |             |             |             |
| FAM162A      | FAM162A      | 3190.660292 | 3175.372643 | 3499.058708 |
| 4707.648426  |              |             |             |             |
| NBR2         | NBR2         | 226.0441669 | 227.1267374 | 250.8885307 |
| 163.7869348  |              |             |             |             |
| KGFLP1       | KGFLP1       | 36.4587366  | 3.521344766 | 79.16926967 |
| 16.67292151  |              |             |             |             |
| LOC728024    | LOC728024    |             | 35.41705842 | 23.76907717 |
| 36.7969845   | 25.49976231  |             |             |             |
| KGFLP2       | KGFLP2       | 55.208944   | 10.5640343  | 123.7716751 |
| 38.24964346  |              |             |             |             |
| ZBED3-AS1    | ZBED3-AS1    |             | 0           | 4.401680957 |
| 9.807600887  |              |             |             | 6.690360818 |
| NME7         | NME7         | 1460.432821 | 1971.072733 | 1045.926408 |
| 1392.679326  |              |             |             |             |
| ABHD6        | ABHD6        | 2547.94485  | 695.4655912 | 3297.232823 |
| 739.4931069  |              |             |             |             |
| MTVR2        | MTVR2        | 5.208390943 | 6.16235334  | 20.07108245 |

|                 |                 |  |               |             |   |
|-----------------|-----------------|--|---------------|-------------|---|
| 4.903800443     |                 |  |               |             |   |
| LOC643387       | LOC643387       |  | 4.166712755   | 2.641008574 |   |
| 2.230120273     | 3.923040355     |  |               |             |   |
| ASH1L-AS1       | ASH1L-AS1       |  | 252.0861217   | 293.1519517 |   |
| 304.4114172     | 234.4016612     |  |               |             |   |
| MAST1 MAST1     | 37.50041479     |  | 46.65781815   | 3.345180409 |   |
| 38.24964346     |                 |  |               |             |   |
| CHCHD2 CHCHD2   | 30970.13423     |  | 28733.29295   | 22245.44972 |   |
| 24851.47989     |                 |  |               |             |   |
| COPG1 COPG1     | 19315.83865     |  | 15477.19058   | 15294.16483 |   |
| 16015.81225     |                 |  |               |             |   |
| TAS2R13 TAS2R13 | 0 3.521344766 0 |  | 0             | 0           |   |
| LZTS2 LZTS2     | 478.1302886     |  | 476.2618796   | 741.5149906 |   |
| 990.5676896     |                 |  |               |             |   |
| HS6ST3 HS6ST3   | 0 0             |  | 12.2656615    | 0           |   |
| ORA0V1 ORAOV1   | 259.377869      |  | 326.604727    | 449.3692349 |   |
| 364.842753      |                 |  |               |             |   |
| ESX1 ESX1       | 1.041678189     |  | 0 0           | 0           |   |
| NDNL2 NDNL2     | 2173.98238      |  | 1941.141302   | 3404.278596 |   |
| 2544.09167      |                 |  |               |             |   |
| MUCL1 MUCL1     | 2.083356377     |  | 0 39.02710477 | 35.30736319 |   |
| HSPA5 HSPA5     | 79843.59149     |  | 38703.98066   | 59061.39024 |   |
| 47553.13366     |                 |  |               |             |   |
| CAPN7 CAPN7     | 2448.985422     |  | 1968.431724   | 2827.792506 |   |
| 2381.285495     |                 |  |               |             |   |
| UGGT1 UGGT1     | 3851.084264     |  | 5981.884421   | 4075.544798 |   |
| 3650.38905      |                 |  |               |             |   |
| FBXL12 FBXL12   | 391.670999      |  | 577.5005416   | 633.3541574 |   |
| 504.1106856     |                 |  |               |             |   |
| RWDD4 RWDD4     | 1772.936277     |  | 1610.134894   | 1578.925153 |   |
| 1482.909254     |                 |  |               |             |   |
| SLC10A4 SLC10A4 | 2.083356377     |  | 5.282017149   | 0 0         |   |
| TMEM154 TMEM154 | 1160.429502     |  | 1680.561789   | 1074.917971 |   |
| 1092.566739     |                 |  |               |             |   |
| FBX08 FBX08     | 1402.098842     |  | 1140.035368   | 1286.779397 |   |
| 1342.660561     |                 |  |               |             |   |
| FBX07 FBX07     | 11768.88018     |  | 9571.015073   | 11544.21759 |   |
| 11207.14553     |                 |  |               |             |   |
| MY015A MY015A   | 4.166712755     |  | 14.08537906   | 12.2656615  |   |
| 21.57672195     |                 |  |               |             |   |
| WHAMMP3 WHAMMP3 | 1.041678189     |  | 2.641008574   | 129.3469758 |   |
| 88.26840798     |                 |  |               |             |   |
| LOC148696       | LOC148696       |  | 1.041678189   | 5.282017149 | 0 |
| 0               |                 |  |               |             |   |
| TINCR TINCR     | 6.250069132     |  | 7.923025723   | 31.22168382 |   |
| 5.884560532     |                 |  |               |             |   |
| TTC28-AS1       | TTC28-AS1       |  | 326.0452731   | 525.5607063 |   |
| 360.164424      | 367.7850333     |  |               |             |   |
| LINC00116       | LINC00116       |  | 915.6351279   | 962.2074572 |   |
| 1034.775806     | 976.8370483     |  |               |             |   |



|              |              |             |             |             |
|--------------|--------------|-------------|-------------|-------------|
| LOC284837    | LOC284837    | 2.083356377 | 12.32470668 | 0           |
| 16.67292151  |              |             |             |             |
| SARNP        | SARNP        | 7190.704537 | 5840.150294 | 5211.791077 |
| 5755.1002    |              |             |             |             |
| FAM222A-AS1  | FAM222A-AS1  | 0           | 0.880336191 | 4.460240545 |
| 0.980760089  |              |             |             |             |
| FLVCR1-AS1   | FLVCR1-AS1   | 215.6273851 | 241.2121165 |             |
| 178.4096218  | 188.305937   |             |             |             |
| CTAGE8       | CTAGE8       | 0           | 0.880336191 | 1.115060136 |
| 0            |              |             |             | 0           |
| SMG1P3       | SMG1P3       | 346.8788368 | 470.0995262 | 637.8143979 |
| 598.2636541  |              |             |             |             |
| ACTR1B       | ACTR1B       | 642.7154424 | 1471.041776 | 801.728238  |
| 1096.489779  |              |             |             |             |
| HDAC6        | HDAC6        | 2691.69644  | 3406.901061 | 1985.922103 |
| 2983.47219   |              |             |             |             |
| MY05A        | MY05A        | 3969.835577 | 4455.381465 | 2615.93108  |
| 3366.949384  |              |             |             |             |
| IDUA         | IDUA         | 157.2934065 | 175.1869021 | 207.4011853 |
| 304.0356275  |              |             |             |             |
| ULK1         | ULK1         | 150.0016592 | 426.0827167 | 263.1541922 |
| 160.8446545  |              |             |             |             |
| UBA2         | UBA2         | 7880.295498 | 10564.0343  | 7459.752312 |
| 7751.927741  |              |             |             |             |
| EXD3         | EXD3         | 72.91747321 | 106.5206792 | 117.0813143 |
| 181.4406164  |              |             |             |             |
| MIR18B       | MIR18B       | 1.041678189 | 0           | 0           |
| 0            |              |             |             | 0           |
| MIR4258      | MIR4258      | 15.62517283 | 7.042689532 | 21.18614259 |
| 11.76912106  |              |             |             |             |
| MAN1B1-AS1   | MAN1B1-AS1   | 78.12586415 | 97.71731725 |             |
| 72.47890886  | 99.05676896  |             |             |             |
| KTN1-AS1     | KTN1-AS1     | 30.20866747 | 73.06790389 |             |
| 34.56686422  | 80.42232727  |             |             |             |
| LOC100272216 | LOC100272216 | 21.87524196 | 15.84605145 |             |
| 12.2656615   | 26.48052239  |             |             |             |
| ARRDC3-AS1   | ARRDC3-AS1   | 33.33370204 | 26.41008574 |             |
| 43.48734531  | 26.48052239  |             |             |             |
| HSD52        | HSD52        | 2.083356377 | 0           | 4.903800443 |
| 0            |              |             |             | 0           |
| IGFBP7-AS1   | IGFBP7-AS1   | 5.208390943 | 11.44437049 |             |
| 2.230120273  | 7.846080709  |             |             |             |
| LOC100131635 | LOC100131635 | 2.083356377 | 0           | 0           |
| 2.942280266  |              |             |             |             |
| SIGLEC16     | SIGLEC16     | 0           | 0.880336191 | 4.460240545 |
| 0            |              |             |             |             |
| GDI1         | GDI1         | 3799.000354 | 3886.684285 | 4252.83936  |
| 4257.479545  |              |             |             |             |
| FAM83H       | FAM83H       | 10.41678189 | 36.97412004 | 12.2656615  |
| 23.53824213  |              |             |             |             |
| RTN4IP1      | RTN4IP1      | 1291.680954 | 1074.010154 | 663.4607811 |
| 865.0303982  |              |             |             |             |
| RCN3         | RCN3         | 37.50041479 | 87.15328295 | 101.4704724 |

|                 |              |  |               |               |   |
|-----------------|--------------|--|---------------|---------------|---|
| 198.1135379     |              |  |               |               |   |
| CBX8 CBX8       | 103.1261407  |  | 116.2043773   | 69.13372845   |   |
| 143.1909729     |              |  |               |               |   |
| DDX23 DDX23     | 8627.178759  |  | 8495.244247   | 8027.317921   |   |
| 8267.807547     |              |  |               |               |   |
| ABCC1 ABCC1     | 2437.526962  |  | 4414.886      | 2202.243769   |   |
| 2567.629912     |              |  |               |               |   |
| LOC653513       | LOC653513    |  | 4.166712755   | 4.401680957   |   |
| 8.92048109      | 9.807600887  |  |               |               |   |
| STK16 STK16     | 2280.233555  |  | 2882.220691   | 1566.659491   |   |
| 2196.902599     |              |  |               |               |   |
| LOC100128361    | LOC100128361 |  | 251.0444435   | 250.0154784   |   |
| 161.6837198     | 231.4593809  |  |               |               |   |
| LOC728752       | LOC728752    |  | 45.8338403    | 66.90555055   |   |
| 70.24878858     | 66.69168603  |  |               |               |   |
| USP27X USP27X   | 14.58349464  |  | 24.64941336   | 54.63794668   |   |
| 26.48052239     |              |  |               |               |   |
| EPB41L3 EPB41L3 | 65.62572589  |  | 5.282017149   | 138.2674569   | 0 |
| OAF OAF         | 170.8352229  |  | 196.3149707   | 181.7548022   |   |
| 129.4603317     |              |  |               |               |   |
| STKLD1 STKLD1   | 102.0844625  |  | 84.51227438   | 73.59396899   |   |
| 101.0182891     |              |  |               |               |   |
| CDRT15P1        | CDRT15P1     |  | 8.33342551    | 22.00840479   | 0 |
|                 | 11.76912106  |  |               |               |   |
| GOLGA8M GOLGA8M | 2.083356377  |  | 0 0           | 1.961520177   |   |
| QSOX2 QSOX2     | 109.3762098  |  | 234.1694269   | 84.74457036   |   |
| 201.0558182     |              |  |               |               |   |
| TSG1 TSG1       | 0 0          |  | 0 1.961520177 |               |   |
| MAPKAPK5-AS1    | MAPKAPK5-AS1 |  | 1876.062418   | 1877.757096   |   |
| 2200.013649     | 1901.693812  |  |               |               |   |
| FLJ13224        | FLJ13224     |  | 89.58432423   | 85.39261057   |   |
| 71.36384872     | 82.38384745  |  |               |               |   |
| BBS1 BBS1       | 533.3392326  |  | 576.6202054   | 836.2951022   |   |
| 835.6075955     |              |  |               |               |   |
| EVPL EVPL       | 0 0          |  | 0 14.71140133 |               |   |
| FRY FRY         | 83.3342551   |  | 214.8020307   | 128.2319157   |   |
| 88.26840798     |              |  |               |               |   |
| PPAP2B PPAP2B   | 0 0          |  | 7.805420954   | 0             |   |
| NDST2 NDST2     | 3293.786433  |  | 3792.488313   | 4193.741172   |   |
| 4892.031322     |              |  |               |               |   |
| PGS1 PGS1       | 3219.827281  |  | 3027.476162   | 2200.013649   |   |
| 3447.371712     |              |  |               |               |   |
| C21orf91-OT1    | C21orf91-OT1 |  | 152.0850156   | 223.6053926   |   |
| 248.6584104     | 148.0947734  |  |               |               |   |
| LOC100505666    | LOC100505666 |  | 60.41733494   | 44.01680957   |   |
| 42.37228518     | 48.05724434  |  |               |               |   |
| FLJ40194        | FLJ40194     |  | 0 0           | 0 2.942280266 |   |
| USP2-AS1        | USP2-AS1     |  | 7.291747321   | 3.521344766   |   |
| 8.92048109      | 20.59596186  |  |               |               |   |
| FLJ30403        | FLJ30403     |  | 10.41678189   | 11.44437049   |   |

|              |              |             |             |             |             |
|--------------|--------------|-------------|-------------|-------------|-------------|
| 22.30120273  | 33.34584301  |             |             |             |             |
| LOC100507391 | LOC100507391 | 0           | 1.760672383 | 0           | 0           |
| LGALS17A     | LGALS17A     | 107.2928534 |             | 73.94824008 |             |
| 727.0192088  | 197.1327778  |             |             |             |             |
| SPANXA2-OT1  | SPANXA2-OT1  | 1.041678189 |             | 2.641008574 | 0           |
| 0            |              |             |             |             |             |
| LOC100507140 | LOC100507140 | 3.125034566 |             | 6.16235334  | 0           |
| 0.980760089  |              |             |             |             |             |
| ZBED5-AS1    | ZBED5-AS1    | 423.9630228 |             | 352.1344766 |             |
| 460.5198363  | 427.6113987  |             |             |             |             |
| LINC00299    | LINC00299    | 10.41678189 |             | 6.16235334  | 0           |
| 9.807600887  |              |             |             |             |             |
| LOC400655    | LOC400655    | 0           | 0           | 0           | 0.980760089 |
| LOC100499194 | LOC100499194 | 1.041678189 |             | 3.521344766 | 0           |
| 2.942280266  |              |             |             |             |             |
| LINC01191    | LINC01191    | 8.33342551  |             | 0.880336191 |             |
| 6.690360818  | 5.884560532  |             |             |             |             |
| LINC01160    | LINC01160    | 154.1683719 |             | 131.1700925 |             |
| 95.89517172  | 125.5372913  |             |             |             |             |
| LINC00959    | LINC00959    | 166.6685102 |             | 132.0504287 |             |
| 364.6246646  | 279.5166253  |             |             |             |             |
| CKMT2-AS1    | CKMT2-AS1    | 187.502074  |             | 235.0497631 |             |
| 286.570455   | 229.4978607  |             |             |             |             |
| STXBP5-AS1   | STXBP5-AS1   | 66.66740408 |             | 46.65781815 |             |
| 44.60240545  | 70.61472638  |             |             |             |             |
| LOC100288123 | LOC100288123 | 2.083356377 |             | 12.32470668 |             |
| 2.230120273  | 0.980760089  |             |             |             |             |
| SART3        | SART3        | 6432.362815 |             | 5334.83732  | 6513.066256 |
| 6422.017061  |              |             |             |             |             |
| NFE2L3       | NFE2L3       | 5936.523997 |             | 5017.035955 | 2748.623236 |
| 3972.078359  |              |             |             |             |             |
| MIR195       | MIR195       | 7.291747321 |             | 2.641008574 | 2.230120273 |
| 0.980760089  |              |             |             |             |             |
| LINC00333    | LINC00333    | 1.041678189 |             | 11.44437049 | 0           |
| 5.884560532  |              |             |             |             |             |
| LOC100128682 | LOC100128682 | 0           | 0           | 0           | 0.980760089 |
| NGRN         | NGRN         | 3554.20598  |             | 2341.694269 | 5392.430819 |
| 4004.443442  |              |             |             |             |             |
| TBC1D29      | TBC1D29      | 0           | 1.760672383 | 0           | 0           |
| LOC100507577 | LOC100507577 | 827.0924818 |             | 865.3704762 |             |
| 1079.378212  | 1000.37529   |             |             |             |             |
| SMG1P7       | SMG1P7       | 37.50041479 |             | 60.74319721 | 34.56686422 |
| 34.3266031   |              |             |             |             |             |
| MFI2-AS1     | MFI2-AS1     | 11.45846008 |             | 21.12806859 |             |
| 5.575300681  | 8.826840798  |             |             |             |             |
| IPW          | IPW          | 70.83411683 |             | 69.54655912 | 95.89517172 |
| 73.55700665  |              |             |             |             |             |
| PEG3-AS1     | PEG3-AS1     | 0           | 0.880336191 | 0           | 0           |
| RNU4ATAC     | RNU4ATAC     | 34.37538023 |             | 42.25613719 |             |
| 33.45180409  | 20.59596186  |             |             |             |             |

|                 |               |               |               |
|-----------------|---------------|---------------|---------------|
| LOC284454       | LOC284454     | 92.70935879   | 112.6830325   |
| 73.59396899     | 190.2674572   |               |               |
| LINC00582       | LINC00582     | 0 0           | 0 1.961520177 |
| ENPP6 ENPP6     | 37.50041479   | 22.88874098   | 25.64638313   |
| 30.40356275     |               |               |               |
| SLC25A28        | SLC25A28      | 979.1774974   | 1024.711327   |
| 1280.089036     | 1039.605694   |               |               |
| ZNF750 ZNF750   | 6.250069132   | 10.5640343    | 0 13.73064124 |
| FAM118B FAM118B | 1995.85541    | 1726.339271   | 1897.832352   |
| 1653.561509     |               |               |               |
| OAS3 OAS3       | 11370.95911   | 10951.38222   | 19400.93131   |
| 6974.184991     |               |               |               |
| PI4KAP1 PI4KAP1 | 170.8352229   | 81.8712658    | 259.8090118   |
| 136.3256523     |               |               |               |
| DPY19L2P2       | DPY19L2P2     | 116.6679571   | 183.1099278   |
| 107.0457731     | 178.4983361   |               |               |
| MAP9 MAP9       | 192.7104649   | 220.9643841   | 384.695747    |
| 274.6128248     |               |               |               |
| LOC728392       | LOC728392     | 50.00055306   | 164.6228678   |
| 237.507809      | 179.4790962   |               |               |
| NBPF12 NBPF12   | 212.5023505   | 222.7250564   | 468.3252572   |
| 375.631114      |               |               |               |
| MIR548J MIR548J | 0 0.880336191 | 2.230120273   | 0             |
| LOC728989       | LOC728989     | 3.125034566   | 23.76907717   |
| 1.115060136     | 7.846080709   |               |               |
| ICMT ICMT       | 7171.954329   | 6665.905642   | 5066.833259   |
| 5513.833218     |               |               |               |
| TMEM144 TMEM144 | 0 19.36739621 | 3.345180409   | 0             |
| ABHD1 ABHD1     | 427.0880574   | 252.6564869   | 335.633101    |
| 320.708549      |               |               |               |
| DACT3 DACT3     | 62.50069132   | 9.683698106   | 146.0728779   |
| 52.96104479     |               |               |               |
| MAB21L2 MAB21L2 | 1.041678189   | 9.683698106   | 0 0           |
| IFITM2 IFITM2   | 5172.973885   | 14297.54009   | 9200.361184   |
| 20691.09559     |               |               |               |
| ITGA5 ITGA5     | 684.38257     | 773.8155123   | 1564.429371   |
| 1596.677424     |               |               |               |
| UBR7 UBR7       | 9553.230669   | 9067.462772   | 6687.015637   |
| 6697.610646     |               |               |               |
| USE1 USE1       | 562.5062219   | 824.8750114   | 706.9481264   |
| 834.6268355     |               |               |               |
| SNTA1 SNTA1     | 317.7118476   | 325.7243908   | 423.7228518   |
| 557.0717304     |               |               |               |
| TLR3 TLR3       | 12.50013826   | 20.2477324    | 180.6397421   |
| 52.96104479     |               |               |               |
| FCER1A FCER1A   | 0 0           | 0 3.923040355 |               |
| TRIP6 TRIP6     | 1082.303638   | 1110.103937   | 774.9667947   |
| 1073.932297     |               |               |               |
| TRHR TRHR       | 0 0.880336191 | 0             | 0             |
| GNPDA1 GNPDA1   | 1954.188282   | 1687.604479   | 4415.63814    |

|             |            |             |             |             |
|-------------|------------|-------------|-------------|-------------|
| 4431.074081 |            |             |             |             |
| KCNH4       | KCNH4      | 58.33397857 | 26.41008574 | 63.55842777 |
| 71.59548647 |            |             |             |             |
| PPM1A       | PPM1A      | 1292.722632 | 1618.05792  | 1519.826966 |
| 1075.893817 |            |             |             |             |
| RDH10       | RDH10      | 11868.88128 | 9236.487321 | 3511.324369 |
| 3930.886435 |            |             |             |             |
| TEDDM1      | TEDDM1     | 0           | 2.641008574 | 0           |
| ZDHHC24     | ZDHHC24    | 1002.094418 | 1118.907299 | 0.980760089 |
| 965.0679272 |            |             |             | 547.4945269 |
| MRPS9       | MRPS9      | 3475.038437 | 2573.222688 | 3057.494894 |
| 2956.010907 |            |             |             |             |
| NUP85       | NUP85      | 5300.058624 | 4702.755935 | 3829.116508 |
| 4437.939401 |            |             |             |             |
| TEKT5       | TEKT5      | 0           | 0           | 1.115060136 |
| TOR4A       | TOR4A      | 417.7129537 | 937.5580439 | 0           |
| 274.6128248 |            |             |             | 138.2674569 |
| WDR18       | WDR18      | 6507.363645 | 4462.424154 | 4484.771868 |
| 4936.165526 |            |             |             |             |
| HSPA7       | HSPA7      | 0           | 0.880336191 | 1.115060136 |
| DLGAP1-AS1  | DLGAP1-AS1 | 210.4189941 | 307.2373308 | 0           |
| 285.4553949 |            |             |             | 540.3988089 |
| JAZF1-AS1   | JAZF1-AS1  | 1.041678189 | 7.042689532 |             |
| 21.18614259 |            |             |             | 18.63444168 |
| LINC00858   | LINC00858  | 0           | 2.641008574 | 1.115060136 |
| 1.961520177 |            |             |             |             |
| PMS2P5      | PMS2P5     | 546.8810491 | 286.9895984 | 350.1288828 |
| 346.2083113 |            |             |             |             |
| ACTL10      | ACTL10     | 257.2945126 | 201.5969878 | 363.5096044 |
| 314.8239885 |            |             |             |             |
| ZCCHC8      | ZCCHC8     | 1889.604234 | 1537.06699  | 1787.441398 |
| 1819.309964 |            |             |             |             |
| CAMK1D      | CAMK1D     | 60.41733494 | 67.78588674 | 231.9325083 |
| 156.9216142 |            |             |             |             |
| IFI30       | IFI30      | 5958.399239 | 3972.957232 | 3296.117763 |
| 2374.420175 |            |             |             |             |
| PYG02       | PYG02      | 2683.363014 | 3053.005912 | 2797.685882 |
| 2922.665064 |            |             |             |             |
| GPT         | GPT        | 0           | 0           | 1.115060136 |
| OTUD6B      | OTUD6B     | 1682.310275 | 1426.14463  | 0           |
| 1723.195476 |            |             |             | 1517.596845 |
| ADAP2       | ADAP2      | 18.7502074  | 8.803361914 | 28.99156354 |
| 8.826840798 |            |             |             |             |
| UBE2Z       | UBE2Z      | 7802.169633 | 7264.534252 | 10112.48038 |
| 9516.31514  |            |             |             |             |
| TMSB15B     | TMSB15B    | 123.9597045 | 199.8363155 | 133.8072164 |
| 163.7869348 |            |             |             |             |
| ZNF367      | ZNF367     | 2204.191047 | 2361.942002 | 2206.70401  |
| 2268.498085 |            |             |             |             |
| LOC440461   | LOC440461  | 0           | 1.760672383 | 21.18614259 |

|              |              |             |             |             |
|--------------|--------------|-------------|-------------|-------------|
|              | 29.42280266  |             |             |             |
| IGF2-AS      | IGF2-AS      | 0           | 0           | 1.115060136 |
| UGCG         | UGCG         | 691.6743173 |             | 12.74988115 |
| 914.0684026  |              |             |             | 685.7818931 |
| DBF4         | DBF4         | 5018.805513 |             | 1078.263152 |
| 3262.008055  |              |             |             | 4047.785808 |
| HIST2H2BC    | HIST2H2BC    |             |             | 3082.026217 |
| 3.345180409  | 1.961520177  |             |             | 4.166712755 |
| POM121L9P    | POM121L9P    |             |             | 4.401680957 |
| 1.961520177  |              |             |             | 5.208390943 |
| BIN3-IT1     | BIN3-IT1     |             |             | 0           |
| 12.2656615   | 7.846080709  |             |             | 0           |
| SNORD119     | SNORD119     |             |             | 6.250069132 |
| 11.15060136  | 30.40356275  |             |             | 18.48706002 |
| LINC01144    | LINC01144    |             |             | 7.846080709 |
| 23.41626286  | 20.59596186  |             |             | 15.62517283 |
| MST02P       | MST02P       |             |             | 9.683698106 |
| 3475.813754  | 3327.120135  |             |             | 15.62517283 |
| FAM86C2P     | FAM86C2P     |             |             | 30.40356275 |
| 199.5957644  | 146.1332532  |             |             | 5.208390943 |
| PSMD5-AS1    | PSMD5-AS1    |             |             | 5.208390943 |
| 1444.002876  | 366.8042732  |             |             | 20.59596186 |
| RBAKDN       | RBAKDN       |             |             | 2087.27711  |
| WDFY3-AS2    | WDFY3-AS2    |             |             | 2087.27711  |
| 0.980760089  | 0            | 0.880336191 | 2.230120273 | 3115.478021 |
| LINC00643    | LINC00643    |             |             | 108.3345316 |
| CWC25        | CWC25        |             |             | 79.23025723 |
| 1653.561509  | 2158.357207  |             |             | 710.4245247 |
| ANKLE2       | ANKLE2       |             |             | 461.2961643 |
| 7986.329402  | 8311.550268  |             |             | 0           |
| LOC653653    | LOC653653    |             |             | 0           |
| 6.690360818  | 0            |             |             | 0           |
| LINC01366    | LINC01366    |             |             | 5.884560532 |
| 35.68192436  | 17.6536816   |             |             | 5.884560532 |
| MDS2         | MDS2         |             |             | 1489.528836 |
| 82.38384745  | 15.62517283  |             |             | 2188.863047 |
| VAC14-AS1    | VAC14-AS1    |             |             | 7019.800791 |
| 439.3336937  | 399.1693561  |             |             | 7449.71677  |
| LOC100130950 | LOC100130950 |             |             | 3.125034566 |
| 44.60240545  | 20.59596186  |             |             | 1.760672383 |
| DECR2        | DECR2        |             |             | 3.125034566 |
| 486.457004   | 220.835776   |             |             | 16.66685102 |
| PDS5B        | PDS5B        |             |             | 8.803361914 |
| 5354.950084  | 6460.488126  |             |             | 17.6536816  |
| TOP3A        | TOP3A        |             |             | 15.62517283 |
| 3646.46601   | 3394.829217  |             |             | 14.08537906 |
| NICN1        | NICN1        |             |             | 99.24035213 |
| 668.8783805  | 800.0088489  |             |             | 99.24035213 |
| SLC25A33     | SLC25A33     |             |             | 418.7546319 |
| 2056.170891  | 1937.981935  |             |             | 275.5452279 |
|              |              |             |             | 275.5452279 |
|              |              |             |             | 25.00027653 |
|              |              |             |             | 22.88874098 |
|              |              |             |             | 20.59596186 |
|              |              |             |             | 291.3912794 |
|              |              |             |             | 217.4367266 |
|              |              |             |             | 7040.048523 |
|              |              |             |             | 5966.686789 |
|              |              |             |             | 3931.581431 |
|              |              |             |             | 2815.526844 |
|              |              |             |             | 722.7560132 |
|              |              |             |             | 470.5553775 |
|              |              |             |             | 2436.485283 |
|              |              |             |             | 1580.203464 |

|             |             |             |             |             |             |
|-------------|-------------|-------------|-------------|-------------|-------------|
| C0Q5        | C0Q5        | 4154.212617 | 2795.067408 | 3184.611749 |             |
| 2671.590482 |             |             |             |             |             |
| WDR24       | WDR24       | 1759.394461 | 1768.595409 | 1704.926948 |             |
| 1788.906402 |             |             |             |             |             |
| PTPLAD2     | PTPLAD2     | 1184.388101 | 1640.066325 | 751.5505318 |             |
| 1011.163651 |             |             |             |             |             |
| CASC10      | CASC10      | 1.041678189 | 0.880336191 | 0           | 0           |
| ASPHD1      | ASPHD1      | 10.41678189 | 14.96571525 | 6.690360818 |             |
| 21.57672195 |             |             |             |             |             |
| FAM230C     | FAM230C     | 0           | 0           | 0.980760089 |             |
| COL6A4P1    | COL6A4P1    |             | 3.125034566 | 0           | 0           |
| 0.980760089 |             |             |             |             |             |
| AASDHPPT    | AASDHPPT    |             | 5047.972502 | 4627.927358 |             |
| 4740.120639 | 4706.667666 |             |             |             |             |
| LOC643802   | LOC643802   |             | 0           | 0           | 1.961520177 |
| TAS1R3      | TAS1R3      | 2.083356377 | 7.042689532 | 10.03554123 |             |
| 6.865320621 |             |             |             |             |             |
| LOC93622    | LOC93622    |             | 1093.762098 | 829.2766923 |             |
| 1130.670978 | 1075.893817 |             |             |             |             |
| TRAF7       | TRAF7       | 920.8435188 | 1783.561124 | 975.6776192 |             |
| 928.779804  |             |             |             |             |             |
| WRN         | WRN         | 1564.600639 | 1716.655573 | 1202.034827 |             |
| 1883.05937  |             |             |             |             |             |
| ZNF19       | ZNF19       | 73.9591514  | 71.30723151 | 144.9578177 |             |
| 98.07600887 |             |             |             |             |             |
| ZNF17       | ZNF17       | 394.7960335 | 315.1603565 | 830.7198015 |             |
| 512.9375264 |             |             |             |             |             |
| BEST4       | BEST4       | 20.83356377 | 10.5640343  | 40.14216491 |             |
| 22.55748204 |             |             |             |             |             |
| MCM3AP      | MCM3AP      | 5062.555997 | 8352.629784 | 6156.247012 |             |
| 5774.715402 |             |             |             |             |             |
| TMEM63A     | TMEM63A     | 1779.186346 | 2139.216945 | 1423.931794 |             |
| 2395.996897 |             |             |             |             |             |
| GTPBP4      | GTPBP4      | 12170.96796 | 7907.179671 | 10152.62254 |             |
| 10838.37974 |             |             |             |             |             |
| NFYC-AS1    | NFYC-AS1    |             | 681.2575354 | 610.0729807 |             |
| 575.3710303 | 601.2059344 |             |             |             |             |
| NDUFB2-AS1  | NDUFB2-AS1  |             | 1954.188282 | 1729.860616 |             |
| 1564.429371 | 1414.256048 |             |             |             |             |
| LINC00926   | LINC00926   |             | 7.291747321 | 11.44437049 | 0           |
| 16.67292151 |             |             |             |             |             |
| PTGES2-AS1  | PTGES2-AS1  |             | 2.083356377 | 1.760672383 |             |
| 3.345180409 | 14.71140133 |             |             |             |             |
| ANP32AP1    | ANP32AP1    |             | 1.041678189 | 0.880336191 | 0           |
| 0           |             |             |             |             |             |
| HTR7P1      | HTR7P1      | 6.250069132 | 10.5640343  | 28.99156354 |             |
| 20.59596186 |             |             |             |             |             |
| PLOD3       | PLOD3       | 1835.436968 | 1803.808856 | 1474.1095   |             |
| 1521.158898 |             |             |             |             |             |
| PROCA1      | PROCA1      | 19.79188559 | 37.85445623 | 36.7969845  |             |

|             |         |             |             |             |             |   |
|-------------|---------|-------------|-------------|-------------|-------------|---|
| 41.19192372 |         |             |             |             |             |   |
| SLC35G3     | SLC35G3 | 5.208390943 | 9.683698106 | 2.230120273 |             | 0 |
| ZNF597      | ZNF597  | 254.169478  | 207.7593412 | 333.4029807 |             |   |
| 305.9971477 |         |             |             |             |             |   |
| ARX         | ARX     | 0           | 0           | 0           | 0.980760089 |   |
| EIF3I       | EIF3I   | 26000.28759 | 13822.15854 | 15100.14437 |             |   |
| 15889.2942  |         |             |             |             |             |   |
| NABP2       | NABP2   | 488.5470705 | 1343.393028 | 411.4571903 |             |   |
| 392.3040355 |         |             |             |             |             |   |
| C7orf26     | C7orf26 | 1104.17888  | 1705.211203 | 1274.513736 |             |   |
| 1286.757236 |         |             |             |             |             |   |
| PDAP1       | PDAP1   | 5265.683244 | 6822.605484 | 3734.336396 |             |   |
| 4857.704719 |         |             |             |             |             |   |
| SDCCAG8     | SDCCAG8 | 1489.59981  | 526.4410425 | 1237.716751 |             |   |
| 799.3194723 |         |             |             |             |             |   |
| GPR75       | GPR75   | 6.250069132 | 6.16235334  | 6.690360818 |             |   |
| 0.980760089 |         |             |             |             |             |   |
| TEX15       | TEX15   | 12.50013826 | 2.641008574 | 4.460240545 |             |   |
| 3.923040355 |         |             |             |             |             |   |
| WDR3        | WDR3    | 5912.565399 | 4118.212704 | 6162.937373 |             |   |
| 6248.422525 |         |             |             |             |             |   |
| PEX14       | PEX14   | 237.502627  | 555.4921368 | 266.4993726 |             |   |
| 222.6325401 |         |             |             |             |             |   |
| NDUFA10     | NDUFA10 | 7641.751192 | 6360.428983 | 6162.937373 |             |   |
| 6618.169078 |         |             |             |             |             |   |
| CPLX1       | CPLX1   | 0           | 14.96571525 | 4.460240545 | 3.923040355 |   |
| JOSD1       | JOSD1   | 911.4684151 | 1215.74428  | 929.9601536 |             |   |
| 848.3574767 |         |             |             |             |             |   |
| PRKCA       | PRKCA   | 386.462608  | 561.6544901 | 444.9089944 |             |   |
| 393.2847956 |         |             |             |             |             |   |
| DMRTA1      | DMRTA1  | 6.250069132 | 0           | 26.76144327 | 0           |   |
| C7          | C7      | 0           | 0           | 3.345180409 | 0           |   |
| NUCB1       | NUCB1   | 5186.515702 | 7499.584015 | 5144.887469 |             |   |
| 5089.1641   |         |             |             |             |             |   |
| GTF3C3      | GTF3C3  | 5045.889146 | 3965.034206 | 4184.820691 |             |   |
| 4261.402585 |         |             |             |             |             |   |
| HCFC2       | HCFC2   | 2068.772883 | 1401.495217 | 1601.226356 |             |   |
| 1474.082413 |         |             |             |             |             |   |
| CCNB2       | CCNB2   | 12940.76814 | 12985.83916 | 4539.409815 |             |   |
| 5980.675021 |         |             |             |             |             |   |
| ZNF443      | ZNF443  | 445.8382648 | 265.8615298 | 557.5300681 |             |   |
| 399.1693561 |         |             |             |             |             |   |
| BHLHE40     | BHLHE40 | 17996.03239 | 15947.29011 | 13904.7999  |             |   |
| 21817.98893 |         |             |             |             |             |   |
| LGR5        | LGR5    | 0           | 3.521344766 | 0           | 0           |   |
| IER2        | IER2    | 11931.38197 | 10107.13981 | 8102.02695  |             |   |
| 10528.45955 |         |             |             |             |             |   |
| VPS26A      | VPS26A  | 7333.414448 | 4609.440298 | 6054.77654  |             |   |
| 4699.802345 |         |             |             |             |             |   |
| MIR8052     | MIR8052 | 3.125034566 | 4.401680957 | 0           | 0           |   |



|              |              |             |             |             |             |
|--------------|--------------|-------------|-------------|-------------|-------------|
| SNORD4A      | SNORD4A      | 29.16698928 | 30.8117667  | 41.25722504 |             |
| 23.53824213  |              |             |             |             |             |
| SNORD4B      | SNORD4B      | 0           | 0.880336191 | 3.345180409 | 0.980760089 |
| SNORD73A     | SNORD73A     |             | 22.91692015 | 13.20504287 |             |
| 25.64638313  | 28.44204257  |             |             |             |             |
| IL2RB        | IL2RB        | 30753.46516 | 36202.94554 | 22391.5226  |             |
| 37976.01139  |              |             |             |             |             |
| PSMB7        | PSMB7        | 11709.50452 | 8763.746786 | 8317.233556 |             |
| 8227.596384  |              |             |             |             |             |
| HERC2        | HERC2        | 998.969383  | 1503.614215 | 884.2426881 |             |
| 958.2026066  |              |             |             |             |             |
| SNHG10       | SNHG10       | 391.670999  | 424.3220443 | 447.1391146 |             |
| 481.5532035  |              |             |             |             |             |
| LOC100303749 | LOC100303749 |             | 1.041678189 | 2.641008574 | 0           |
| 0            |              |             |             |             |             |
| NUFIP1       | NUFIP1       | 944.8021171 | 715.7133236 | 982.36798   |             |
| 889.5494004  |              |             |             |             |             |
| SMYD5        | SMYD5        | 1859.395567 | 1392.691855 | 2704.02083  |             |
| 2522.514948  |              |             |             |             |             |
| FAM86HP      | FAM86HP      | 23.95859834 | 50.17916291 | 8.92048109  |             |
| 65.71092594  |              |             |             |             |             |
| NCRUPAR      | NCRUPAR      | 0           | 0.880336191 | 0           | 0           |
| SMAD5-AS1    | SMAD5-AS1    |             | 11.45846008 | 0.880336191 |             |
| 12.2656615   | 0            |             |             |             |             |
| LINC00240    | LINC00240    |             | 1.041678189 | 1.760672383 |             |
| 4.460240545  | 0.980760089  |             |             |             |             |
| LOC554206    | LOC554206    |             | 33.33370204 | 68.66622293 |             |
| 121.5415549  | 70.61472638  |             |             |             |             |
| CCL15-CCL14  | CCL15-CCL14  |             | 1.041678189 | 0           | 0           |
| 0.980760089  |              |             |             |             |             |
| CIRBP-AS1    | CIRBP-AS1    |             | 21.87524196 | 41.375801   |             |
| 105.9307129  | 64.73016585  |             |             |             |             |
| ANKRD20A11P  | ANKRD20A11P  |             | 0           | 116.2043773 | 12.2656615  |
| 65.71092594  |              |             |             |             |             |
| SEPT7P9      | SEPT7P9      | 7.291747321 | 15.84605145 | 3.345180409 |             |
| 6.865320621  |              |             |             |             |             |
| LMCD1-AS1    | LMCD1-AS1    |             | 3.125034566 | 0           | 2.230120273 |
| 0.980760089  |              |             |             |             |             |
| LINC00222    | LINC00222    |             | 0           | 0           | 1.961520177 |
| LINC00883    | LINC00883    |             | 46.87551849 | 62.50386959 |             |
| 46.83252572  | 85.32612771  |             |             |             |             |
| SCGB1B2P     | SCGB1B2P     |             | 0           | 5.282017149 | 5.575300681 |
| 5.884560532  |              |             |             |             |             |
| LINC01330    | LINC01330    |             | 1.041678189 | 0           | 0           |
| ZNF876P      | ZNF876P      | 25.00027653 | 32.57243908 | 63.55842777 |             |
| 41.19192372  |              |             |             |             |             |
| RNF217       | RNF217       | 1.041678189 | 8.803361914 | 0           | 17.6536816  |
| LOC643623    | LOC643623    |             | 0           | 0           | 8.92048109  |
| LOC100506368 | LOC100506368 |             | 0           | 0.880336191 | 0           |
| LOC101927027 | LOC101927027 |             | 820.8424127 | 1134.753351 |             |

|                 |              |                 |               |
|-----------------|--------------|-----------------|---------------|
| 546.3794668     | 514.8990466  |                 |               |
| LINC00663       | LINC00663    | 9.375103698     | 14.08537906   |
| 40.14216491     | 26.48052239  |                 |               |
| MIR191 MIR191   | 10.41678189  | 24.64941336     | 14.49578177   |
| 10.78836098     |              |                 |               |
| MIR135A1        | MIR135A1     | 2.083356377     | 1.760672383   |
| 4.460240545     | 4.903800443  |                 |               |
| MIR922 MIR922   | 303.1283529  | 283.4682536     | 450.4842951   |
| 272.6513047     |              |                 |               |
| WDR86-AS1       | WDR86-AS1    | 3.125034566     | 26.41008574   |
| 26.76144327     | 17.6536816   |                 |               |
| ODF3L1 ODF3L1   | 1.041678189  | 0 0             | 1.961520177   |
| SMURF2 SMURF2   | 478.1302886  | 800.225598      | 1043.696288   |
| 723.8009454     |              |                 |               |
| PPP1R2P9        | PPP1R2P9     | 38.54209298     | 0 10.03554123 |
| 0               |              |                 |               |
| FAM86FP FAM86FP | 20.83356377  | 23.76907717     | 72.47890886   |
| 85.32612771     |              |                 |               |
| MTMR9LP MTMR9LP | 16.66685102  | 25.52974955     | 36.7969845    |
| 46.09572417     |              |                 |               |
| ZMYND19 ZMYND19 | 2160.440563  | 2162.105686     | 1893.372111   |
| 2216.5178       |              |                 |               |
| LINC01018       | LINC01018    | 0 5.282017149 0 |               |
| 0.980760089     |              |                 |               |
| WHAMMP2 WHAMMP2 | 8.33342551   | 6.16235334      | 302.1812969   |
| 120.6334909     |              |                 |               |
| PRKCDBP PRKCDBP | 1215.638446  | 1269.444788     | 1604.571536   |
| 2283.209486     |              |                 |               |
| LOC728739       | LOC728739    | 7.291747321     | 6.16235334    |
| 1.115060136     | 21.57672195  |                 |               |
| LOC100272217    | LOC100272217 | 51.04223125     | 19.36739621   |
| 53.52288654     | 22.55748204  |                 |               |
| NIFK-AS1        | NIFK-AS1     | 2068.772883     | 1426.14463    |
| 2213.39437      | 2057.634666  |                 |               |
| TPM3P9 TPM3P9   | 609.3817404  | 769.4138313     | 551.9547675   |
| 758.1275485     |              |                 |               |
| AQP7P3 AQP7P3   | 0 0          | 0 0.980760089   |               |
| CSNK1G2 CSNK1G2 | 3735.457985  | 5276.735131     | 3270.47138    |
| 4104.480971     |              |                 |               |
| C19orf43        | C19orf43     | 7330.289414     | 7253.970217   |
| 5643.31935      | 6058.155068  |                 |               |
| DHX38 DHX38     | 6340.695135  | 6484.556386     | 5625.478387   |
| 5695.273835     |              |                 |               |
| ZNF287 ZNF287   | 458.338403   | 348.6131318     | 932.1902739   |
| 682.6090217     |              |                 |               |
| PELI1 PELI1     | 6735.491168  | 7120.159116     | 6301.20483    |
| 6553.438912     |              |                 |               |
| UFC1 UFC1       | 5335.475683  | 4750.294089     | 4537.179694   |
| 3856.348669     |              |                 |               |
| ACRBP ACRBP     | 12.50013826  | 7.042689532     | 25.64638313   |

|                 |              |             |             |             |             |
|-----------------|--------------|-------------|-------------|-------------|-------------|
| 20.59596186     |              |             |             |             |             |
| CNFN CNFN       | 9.375103698  | 3.521344766 | 6.690360818 |             |             |
| 2.942280266     |              |             |             |             |             |
| KSR1 KSR1       | 147.9183028  | 523.8000339 | 209.6313056 |             |             |
| 275.5935849     |              |             |             |             |             |
| AP1G2 AP1G2     | 8368.842568  | 7548.002505 | 6324.621093 |             |             |
| 8437.479043     |              |             |             |             |             |
| ACAT2 ACAT2     | 13090.7698   | 10859.82726 | 9276.185274 |             |             |
| 11703.41014     |              |             |             |             |             |
| GAS5-AS1        | GAS5-AS1     | 268.7529727 | 191.9132897 |             |             |
| 655.6553601     | 343.266031   |             |             |             |             |
| MIRLET7F2       | MIRLET7F2    | 0           | 0           | 0           | 2.942280266 |
| MIRLET7F1       | MIRLET7F1    | 0           | 0.880336191 | 0           |             |
| 0.980760089     |              |             |             |             |             |
| LYPLAL1-AS1     | LYPLAL1-AS1  | 6.250069132 | 6.16235334  |             |             |
| 16.72590204     | 15.69216142  |             |             |             |             |
| LOC644838       | LOC644838    | 0           | 0           | 0           | 0.980760089 |
| MIR499B MIR499B | 0            | 0.880336191 | 0           | 0           |             |
| MIR4755 MIR4755 | 13.54181645  | 7.042689532 | 8.92048109  |             |             |
| 14.71140133     |              |             |             |             |             |
| LPAL2 LPAL2     | 3.125034566  | 14.08537906 | 63.55842777 |             |             |
| 8.826840798     |              |             |             |             |             |
| NBEAP1 NBEAP1   | 1.041678189  | 1.760672383 | 0           | 2.942280266 |             |
| LOC100507387    | LOC100507387 | 3.125034566 | 1.760672383 |             |             |
| 1.115060136     | 3.923040355  |             |             |             |             |
| LOC339975       | LOC339975    | 1.041678189 | 61.6235334  | 0           |             |
| 77.480047       |              |             |             |             |             |
| MIR4321 MIR4321 | 0            | 3.521344766 | 0           | 0           |             |
| MIR4322 MIR4322 | 0            | 0           | 2.942280266 |             |             |
| GSTTP2 GSTTP2   | 0            | 1.760672383 | 0           | 0.980760089 |             |
| GOLGA8J GOLGA8J | 0            | 0.880336191 | 0           | 0           |             |
| LOC729506       | LOC729506    | 13.54181645 | 8.803361914 |             |             |
| 20.07108245     | 10.78836098  |             |             |             |             |
| SMO SMO         | 0            | 3.521344766 | 0           | 0           |             |
| FMNL1 FMNL1     | 3393.787539  | 6759.221278 | 2290.33352  |             |             |
| 2940.318746     |              |             |             |             |             |
| CDH22 CDH22     | 2.083356377  | 0           | 0           | 0           |             |
| SDF2L1 SDF2L1   | 5071.931101  | 3508.139723 | 2854.553949 |             |             |
| 2929.530385     |              |             |             |             |             |
| ZFAND3 ZFAND3   | 145.8349464  | 428.7237252 | 172.8343211 |             |             |
| 176.536816      |              |             |             |             |             |
| CALB1 CALB1     | 0            | 1.760672383 | 2.230120273 | 0           |             |
| RNF167 RNF167   | 2448.985422  | 2587.308067 | 1079.378212 |             |             |
| 1285.776476     |              |             |             |             |             |
| GALNT3 GALNT3   | 791.6754234  | 929.6350182 | 343.438522  |             |             |
| 398.188596      |              |             |             |             |             |
| FOXA1 FOXA1     | 40.62544936  | 7.042689532 | 0           | 0           |             |
| SMPDL3A SMPDL3A | 47.91719668  | 49.29882672 | 16.72590204 |             |             |
| 38.24964346     |              |             |             |             |             |
| TAF10 TAF10     | 3566.706118  | 4065.392532 | 3325.109326 |             |             |

|             |             |             |             |             |             |
|-------------|-------------|-------------|-------------|-------------|-------------|
| 3783.772422 |             |             |             |             |             |
| OSTM1       | OSTM1       | 3351.078733 | 2308.241494 | 4499.26765  |             |
| 2576.456753 |             |             |             |             |             |
| FADS1       | FADS1       | 82.29257691 | 420.8006995 | 219.6668468 |             |
| 283.4396656 |             |             |             |             |             |
| SHD         | SHD         | 3.125034566 | 1.760672383 | 4.460240545 |             |
| 4.903800443 |             |             |             |             |             |
| KATNBL1     | KATNBL1     | 2630.237426 | 1920.013234 | 1973.656441 |             |
| 1915.424453 |             |             |             |             |             |
| ADAMTS7P1   | ADAMTS7P1   |             | 0           | 2.230120273 | 0           |
| SSR3        | SSR3        | 8402.17627  | 11051.74055 | 10654.3996  |             |
| 7920.618476 |             |             |             |             |             |
| CXXC5       | CXXC5       | 77.08418596 | 97.71731725 | 72.47890886 |             |
| 115.7296905 |             |             |             |             |             |
| HBEGF       | HBEGF       | 638.5487297 | 340.6901061 | 284.3403347 |             |
| 343.266031  |             |             |             |             |             |
| CRYM        | CRYM        | 0           | 0           | 3.923040355 |             |
| CRYBB1      | CRYBB1      | 12.50013826 | 13.20504287 | 1.115060136 |             |
| 2.942280266 |             |             |             |             |             |
| STOX2       | STOX2       | 0           | 2.230120273 | 0           |             |
| TRIM63      | TRIM63      | 2.083356377 | 0           | 3.345180409 | 0           |
| IFNG-AS1    | IFNG-AS1    |             | 0           | 7.042689532 | 16.72590204 |
| 14.71140133 |             |             |             |             |             |
| GS1-279B7.1 | GS1-279B7.1 |             | 2.083356377 | 0           | 2.230120273 |
| 0           |             |             |             |             |             |
| HIST2H2AC   | HIST2H2AC   |             | 183.3353612 | 279.0665727 |             |
| 128.2319157 | 120.6334909 |             |             |             |             |
| HIST1H2AM   | HIST1H2AM   |             | 233.3359143 | 359.1771661 |             |
| 121.5415549 | 127.4988115 |             |             |             |             |
| TFDP1       | TFDP1       | 16326.22225 | 14387.33438 | 8920.48109  |             |
| 11890.73532 |             |             |             |             |             |
| LINC00865   | LINC00865   |             | 7.291747321 | 21.12806859 |             |
| 28.99156354 | 56.88408514 |             |             |             |             |
| ANKRD20A9P  | ANKRD20A9P  |             | 1.041678189 | 19.36739621 |             |
| 3.345180409 | 27.46128248 |             |             |             |             |
| MIR2116     | MIR2116     | 2.083356377 | 1.760672383 | 0           | 0           |
| SND1-IT1    | SND1-IT1    |             | 64.5840477  | 67.78588674 |             |
| 113.7361339 | 88.26840798 |             |             |             |             |
| DNPH1       | DNPH1       | 4018.794452 | 3780.163606 | 3226.984034 |             |
| 3940.694036 |             |             |             |             |             |
| CRTC2       | CRTC2       | 2931.282423 | 2816.195476 | 2988.361165 |             |
| 3073.702118 |             |             |             |             |             |
| ACOT2       | ACOT2       | 1447.932682 | 985.9765344 | 1110.599896 |             |
| 1284.795716 |             |             |             |             |             |
| PLGLB2      | PLGLB2      | 53.12558762 | 33.45277527 | 53.52288654 |             |
| 63.74940576 |             |             |             |             |             |
| SNRNP200    | SNRNP200    |             | 16667.8927  | 25881.00369 |             |
| 19015.1205  | 21881.73834 |             |             |             |             |
| PRKAA2      | PRKAA2      | 0           | 3.345180409 | 0           |             |
| VRK1        | VRK1        | 8124.048194 | 7223.158451 | 5245.242881 |             |

|              |              |             |             |             |             |
|--------------|--------------|-------------|-------------|-------------|-------------|
| 6106.212312  |              |             |             |             |             |
| TTLL4        | TTLL4        | 2332.317464 | 2077.593412 | 1882.22151  |             |
| 1917.385973  |              |             |             |             |             |
| CHAF1A       | CHAF1A       | 5336.517361 | 6501.282774 | 2463.167841 |             |
| 3616.062447  |              |             |             |             |             |
| EGLN1        | EGLN1        | 2909.407181 | 3602.335695 | 3345.180409 |             |
| 3909.309713  |              |             |             |             |             |
| DNAH12       | DNAH12       | 1.041678189 | 3.521344766 | 20.07108245 |             |
| 9.807600887  |              |             |             |             |             |
| IGSF22       | IGSF22       | 5.208390943 | 9.683698106 | 62.44336763 |             |
| 44.13420399  |              |             |             |             |             |
| LINC01105    | LINC01105    |             | 0           | 0           | 1.961520177 |
| ZNF788       | ZNF788       | 425.004701  | 413.75801   | 431.5282727 |             |
| 381.5156745  |              |             |             |             |             |
| LOC283922    | LOC283922    |             | 243.7526962 | 329.2457356 |             |
| 289.9156354  | 345.2275512  |             |             |             |             |
| LINC00282    | LINC00282    |             | 7.291747321 | 0           | 79.16926967 |
| 24.51900222  |              |             |             |             |             |
| LINC01347    | LINC01347    |             | 67.70908227 | 62.50386959 |             |
| 99.24035213  | 80.42232727  |             |             |             |             |
| MIR875       | MIR875       | 0           | 1.760672383 | 0           | 0           |
| LOC101928896 | LOC101928896 |             | 5.208390943 | 17.60672383 |             |
| 23.41626286  | 4.903800443  |             |             |             |             |
| LOC101928865 | LOC101928865 |             | 13.54181645 | 11.44437049 | 0           |
| 0            |              |             |             |             |             |
| KRT18P55     | KRT18P55     |             | 2.083356377 | 0.880336191 |             |
| 7.805420954  | 0            |             |             |             |             |
| LOC63930     | LOC63930     |             | 0           | 0           | 0.980760089 |
| LINC01446    | LINC01446    |             | 0           | 3.521344766 | 0           |
| LINC00640    | LINC00640    |             | 3.125034566 | 0           | 0           |
| NBPF11       | NBPF11       | 45.8338403  | 44.89714576 | 63.55842777 |             |
| 50.01876452  |              |             |             |             |             |
| NAPSB        | NAPSB        | 130.2097736 | 147.8964802 | 153.8782988 |             |
| 285.4011858  |              |             |             |             |             |
| FAM13A-AS1   | FAM13A-AS1   |             | 59.37565676 | 17.60672383 |             |
| 547.4945269  | 49.03800443  |             |             |             |             |
| PNMA1        | PNMA1        | 5253.183106 | 3353.200553 | 4161.404429 |             |
| 4037.789285  |              |             |             |             |             |
| CGRRF1       | CGRRF1       | 848.9677238 | 662.012816  | 1134.016159 |             |
| 863.068878   |              |             |             |             |             |
| ANKRD35      | ANKRD35      | 162.5017974 | 198.0756431 | 83.62951022 |             |
| 191.2482173  |              |             |             |             |             |
| TUSC3        | TUSC3        | 2.083356377 | 16.72638764 | 0           | 23.53824213 |
| SCARNA10     | SCARNA10     |             | 5.208390943 | 3.521344766 |             |
| 16.72590204  | 10.78836098  |             |             |             |             |
| MED15P9      | MED15P9      | 0           | 0           | 0           | 10.78836098 |
| NPY6R        | NPY6R        | 0           | 3.521344766 | 0           | 0.980760089 |
| SNHG6        | SNHG6        | 898.9682768 | 1408.537906 | 3562.617135 |             |
| 2096.86507   |              |             |             |             |             |
| CCT8         | CCT8         | 34797.25989 | 24682.86614 | 26346.6409  |             |

|                 |              |             |             |             |             |
|-----------------|--------------|-------------|-------------|-------------|-------------|
| 28079.16134     |              |             |             |             |             |
| APBB1IP APBB1IP | 2060.439457  | 3138.398522 | 3007.317188 |             |             |
| 2963.856988     |              |             |             |             |             |
| PUS7 PUS7       | 2298.983762  | 1930.577268 | 2207.81907  |             |             |
| 2575.475993     |              |             |             |             |             |
| RHOF RHOF       | 6695.907397  | 6551.461937 | 6297.85965  |             |             |
| 8090.289971     |              |             |             |             |             |
| CCDC184 CCDC184 | 4.166712755  | 8.803361914 | 25.64638313 |             |             |
| 9.807600887     |              |             |             |             |             |
| SUM04 SUM04     | 54.16726581  | 58.10218863 | 16.72590204 |             |             |
| 29.42280266     |              |             |             |             |             |
| GOLGA6L10       | GOLGA6L10    | 0           | 0.880336191 | 0           | 0           |
| QRFPR QRFPR     | 0            | 0.880336191 | 0           | 0.980760089 |             |
| MRPL16 MRPL16   | 7888.628923  | 5867.440716 | 4752.386301 |             |             |
| 5720.773597     |              |             |             |             |             |
| SRGAP1 SRGAP1   | 2.083356377  | 7.042689532 | 5.575300681 |             |             |
| 13.73064124     |              |             |             |             |             |
| ZNF629 ZNF629   | 7.291747321  | 8.803361914 | 525.1933242 |             |             |
| 259.9014235     |              |             |             |             |             |
| CPLX3 CPLX3     | 3.125034566  | 0           | 0           | 2.942280266 |             |
| C3orf14 C3orf14 | 1348.973254  | 1121.548308 | 617.7433155 |             |             |
| 626.7056967     |              |             |             |             |             |
| POLR3A POLR3A   | 3340.661951  | 3502.857706 | 3466.721964 |             |             |
| 3648.42753      |              |             |             |             |             |
| UPK1A-AS1       | UPK1A-AS1    | 10.41678189 | 1.760672383 |             |             |
| 8.92048109      | 8.826840798  |             |             |             |             |
| PPP2R3C PPP2R3C | 4659.426538  | 4288.997925 | 3679.69845  |             |             |
| 3861.252469     |              |             |             |             |             |
| ZSCAN23 ZSCAN23 | 3.125034566  | 18.48706002 | 4.460240545 |             |             |
| 27.46128248     |              |             |             |             |             |
| WDR82 WDR82     | 5204.224231  | 9542.844315 | 10743.60441 |             |             |
| 7980.444841     |              |             |             |             |             |
| ULBP2 ULBP2     | 54.16726581  | 28.17075813 | 113.7361339 |             |             |
| 21.57672195     |              |             |             |             |             |
| WNT10A WNT10A   | 22.91692015  | 9.683698106 | 298.8361165 |             |             |
| 455.0726811     |              |             |             |             |             |
| LOC102724094    | LOC102724094 | 72.91747321 | 92.4353001  |             |             |
| 12.2656615      | 18.63444168  |             |             |             |             |
| LINC01393       | LINC01393    | 17.70852921 | 19.36739621 |             |             |
| 10.03554123     | 14.71140133  |             |             |             |             |
| LINC01476       | LINC01476    | 0           | 0           | 0           | 1.961520177 |
| SLC35E4 SLC35E4 | 1022.927981  | 1030.87368  | 491.7415201 |             |             |
| 676.7244612     |              |             |             |             |             |
| C16orf87        | C16orf87     | 2417.735076 | 2703.512444 |             |             |
| 1079.378212     | 1507.428256  |             |             |             |             |
| CFAP44-AS1      | CFAP44-AS1   | 5.208390943 | 7.923025723 |             |             |
| 8.92048109      | 2.942280266  |             |             |             |             |
| SLC2A1-AS1      | SLC2A1-AS1   | 19.79188559 | 36.97412004 |             |             |
| 17.84096218     | 12.74988115  |             |             |             |             |
| MIR4671 MIR4671 | 2.083356377  | 0           | 0           | 0           |             |

|              |              |             |             |             |             |
|--------------|--------------|-------------|-------------|-------------|-------------|
| CCDC11       | CCDC11       | 21.87524196 | 29.05109432 | 49.062646   |             |
| 27.46128248  |              |             |             |             |             |
| CLRN1-AS1    | CLRN1-AS1    | 0           | 0           | 0           | 0.980760089 |
| SMU1         | SMU1         | 7368.831507 | 6523.291179 | 7346.016178 |             |
| 7453.776674  |              |             |             |             |             |
| ULBP3        | ULBP3        | 7.291747321 | 12.32470668 | 15.61084191 | 0           |
| PAGR1        | PAGR1        | 4929.221189 | 3822.419743 | 4164.749609 |             |
| 3896.559832  |              |             |             |             |             |
| ZNF428       | ZNF428       | 327.0869513 | 495.6292758 | 427.0680322 |             |
| 419.765318   |              |             |             |             |             |
| KIF6         | KIF6         | 3.125034566 | 20.2477324  | 0           | 25.49976231 |
| HIST1H2BK    | HIST1H2BK    |             | 1345.84822  | 1096.018558 |             |
| 1293.469758  | 684.5705419  |             |             |             |             |
| C19orf18     | C19orf18     |             | 4.166712755 | 7.923025723 |             |
| 15.61084191  | 3.923040355  |             |             |             |             |
| MIR1184-2    | MIR1184-2    |             | 405.2128154 | 410.2366652 |             |
| 473.9005579  | 553.14869    |             |             |             |             |
| USP12        | USP12        | 4279.213999 | 4366.46751  | 4643.110407 |             |
| 4110.365532  |              |             |             |             |             |
| LINC00664    | LINC00664    |             | 11.45846008 | 14.96571525 |             |
| 83.62951022  | 3.923040355  |             |             |             |             |
| SLC39A12-AS1 | SLC39A12-AS1 | 0           | 0           | 0           | 0.980760089 |
| GS1-600G8.3  | GS1-600G8.3  | 0           | 1.760672383 | 0           | 0           |
| LOC100506990 | LOC100506990 |             | 89.58432423 | 84.51227438 |             |
| 414.8023707  | 405.0539166  |             |             |             |             |
| ENTPD3-AS1   | ENTPD3-AS1   |             | 146.8766246 | 78.34992104 |             |
| 243.0831097  | 110.82589    |             |             |             |             |
| HLA-DRB4     | HLA-DRB4     |             | 343.7538023 | 443.6894405 |             |
| 82.51445008  | 161.8254146  |             |             |             |             |
| GPR179       | GPR179       | 0           | 5.282017149 | 0           | 0           |
| DAO          | DAO          | 2.083356377 | 0           | 0           | 0           |
| SCAF1        | SCAF1        | 117.7096353 | 316.0406927 | 132.6921562 |             |
| 109.8451299  |              |             |             |             |             |
| IZUM01       | IZUM01       | 0           | 0           | 8.92048109  | 0           |
| ZBED3        | ZBED3        | 15.62517283 | 23.76907717 | 130.4620359 |             |
| 36.28812328  |              |             |             |             |             |
| LOC100288778 | LOC100288778 |             | 35.41705842 | 82.751602   |             |
| 50.17770613  | 49.03800443  |             |             |             |             |
| C2orf66      | C2orf66      | 10.41678189 | 1.760672383 | 23.41626286 |             |
| 6.865320621  |              |             |             |             |             |
| CCDC85C      | CCDC85C      | 192.7104649 | 313.3996842 | 364.6246646 |             |
| 334.4391902  |              |             |             |             |             |
| ACOT6        | ACOT6        | 2.083356377 | 0.880336191 | 4.460240545 | 0           |
| LAMP1        | LAMP1        | 621.8818787 | 2839.964554 | 1079.378212 |             |
| 816.9731539  |              |             |             |             |             |
| ABCA5        | ABCA5        | 194.7938213 | 333.6474166 | 412.5722504 |             |
| 319.7277889  |              |             |             |             |             |
| OR2T8        | OR2T8        | 0           | 1.760672383 | 0           | 1.961520177 |
| CNIH1        | CNIH1        | 4028.169556 | 3855.872518 | 3631.750864 |             |
| 3447.371712  |              |             |             |             |             |

|              |              |             |             |             |             |   |   |
|--------------|--------------|-------------|-------------|-------------|-------------|---|---|
| KIR2DL2      | KIR2DL2      | 0           | 0           | 0           | 3.923040355 |   |   |
| LOC145783    | LOC145783    |             |             | 84.37593328 | 106.5206792 |   |   |
| 152.7632387  | 118.6719707  |             |             |             |             |   |   |
| BREA2        | BREA2        | 5.208390943 |             | 2.641008574 | 5.575300681 |   |   |
| 17.6536816   |              |             |             |             |             |   |   |
| LOC100128076 | LOC100128076 |             |             | 1.041678189 | 0           | 0 | 0 |
| ZFPM1        | ZFPM1        | 16.66685102 |             | 95.95664487 | 33.45180409 |   |   |
| 28.44204257  |              |             |             |             |             |   |   |
| GANC         | GANC         | 955.218899  |             | 827.51602   | 883.1276279 |   |   |
| 721.8394253  |              |             |             |             |             |   |   |
| CHMP6        | CHMP6        | 2567.736735 |             | 2153.302324 | 1456.268538 |   |   |
| 1677.099752  |              |             |             |             |             |   |   |
| ARMC7        | ARMC7        | 326.0452731 |             | 481.5438967 | 294.375876  |   |   |
| 319.7277889  |              |             |             |             |             |   |   |
| AREL1        | AREL1        | 3629.206809 |             | 5000.309567 | 3943.967702 |   |   |
| 4112.327052  |              |             |             |             |             |   |   |
| OMA1         | OMA1         | 1775.019634 |             | 1687.604479 | 1648.058881 |   |   |
| 1639.830868  |              |             |             |             |             |   |   |
| IL21R-AS1    | IL21R-AS1    |             |             | 4339.631334 | 5653.519021 |   |   |
| 4596.277882  | 8499.266928  |             |             |             |             |   |   |
| BVES-AS1     | BVES-AS1     |             |             | 0           | 3.521344766 | 0 | 0 |
| KCND1        | KCND1        | 30.20866747 |             | 48.41849053 | 12.2656615  |   |   |
| 63.74940576  |              |             |             |             |             |   |   |
| CD2BP2       | CD2BP2       | 4170.879468 |             | 4834.806363 | 3966.268905 |   |   |
| 3850.464108  |              |             |             |             |             |   |   |
| LIX1L        | LIX1L        | 1354.181645 |             | 2648.051264 | 1852.114886 |   |   |
| 1864.424929  |              |             |             |             |             |   |   |
| SPATA2L      | SPATA2L      | 319.7952039 |             | 393.5102776 | 492.8565802 |   |   |
| 407.9961969  |              |             |             |             |             |   |   |
| ADAM1A       | ADAM1A       | 46.87551849 |             | 69.54655912 | 131.5770961 |   |   |
| 50.99952461  |              |             |             |             |             |   |   |
| MIR4799      | MIR4799      | 3.125034566 |             | 1.760672383 | 0           | 0 |   |
| MIR4797      | MIR4797      | 0           | 0.880336191 | 0           | 1.961520177 |   |   |
| MIR4796      | MIR4796      | 0           | 0.880336191 | 5.575300681 | 0           |   |   |
| MIR4793      | MIR4793      | 5.208390943 |             | 20.2477324  | 12.2656615  |   |   |
| 13.73064124  |              |             |             |             |             |   |   |
| MIR4787      | MIR4787      | 18.7502074  |             | 9.683698106 | 6.690360818 |   |   |
| 9.807600887  |              |             |             |             |             |   |   |
| MIR4786      | MIR4786      | 0           | 0.880336191 | 1.115060136 | 0.980760089 |   |   |
| MIR2467      | MIR2467      | 0           | 1.760672383 | 5.575300681 | 0           |   |   |
| MIR4785      | MIR4785      | 12.50013826 |             | 22.88874098 | 32.33674395 |   |   |
| 26.48052239  |              |             |             |             |             |   |   |
| MIR4784      | MIR4784      | 18.7502074  |             | 40.49546481 | 53.52288654 |   |   |
| 31.38432284  |              |             |             |             |             |   |   |
| MIR4783      | MIR4783      | 0           | 0           | 1.115060136 | 0           |   |   |
| MIR4781      | MIR4781      | 0           | 1.760672383 | 0           | 1.961520177 |   |   |
| MIR4775      | MIR4775      | 11.45846008 |             | 15.84605145 | 17.84096218 |   |   |
| 3.923040355  |              |             |             |             |             |   |   |
| MIR4774      | MIR4774      | 1.041678189 |             | 5.282017149 | 0           | 0 |   |
| TTC7B        | TTC7B        | 272.9196854 |             | 305.4766584 | 262.039132  |   |   |



|              |              |             |             |             |             |
|--------------|--------------|-------------|-------------|-------------|-------------|
| 291.2857463  |              |             |             |             |             |
| MIR4482      | MIR4482      | 15.62517283 | 26.41008574 | 46.83252572 |             |
| 25.49976231  |              |             |             |             |             |
| LOC100288637 | LOC100288637 |             | 522.9224507 | 665.5341607 |             |
| 318.907199   | 364.842753   |             |             |             |             |
| ZNF552       | ZNF552       | 546.8810491 | 441.0484319 | 737.0547501 |             |
| 550.2064097  |              |             |             |             |             |
| RPS14P3      | RPS14P3      | 18.7502074  | 29.05109432 | 27.87650341 |             |
| 29.42280266  |              |             |             |             |             |
| LOC643711    | LOC643711    |             | 0           | 0           | 4.903800443 |
| MIR3658      | MIR3658      | 1193.763204 | 853.0457695 | 856.3661847 |             |
| 938.5874049  |              |             |             |             |             |
| MIR3656      | MIR3656      | 1350.014933 | 866.2508124 | 1224.33603  |             |
| 1121.989541  |              |             |             |             |             |
| MIR3655      | MIR3655      | 918.7601624 | 879.4558552 | 902.0836502 |             |
| 957.2218465  |              |             |             |             |             |
| MIR3653      | MIR3653      | 2.083356377 | 7.042689532 | 2.230120273 |             |
| 1.961520177  |              |             |             |             |             |
| LOC101926913 | LOC101926913 |             | 0           | 0           | 1.115060136 |
| SPON1        | SPON1        | 27.08363291 | 13.20504287 | 173.9493813 | 0           |
| 191.2482173  |              |             |             |             |             |
| CXCR1        | CXCR1        | 113.5429226 | 25.52974955 | 26.76144327 |             |
| 1.961520177  |              |             |             |             |             |
| C9orf139     | C9orf139     |             | 48.95887487 | 389.9889328 |             |
| 46.83252572  | 156.9216142  |             |             |             |             |
| LOC101928105 | LOC101928105 |             | 26.04195472 | 19.36739621 |             |
| 17.84096218  | 13.73064124  |             |             |             |             |
| CRY2         | CRY2         | 1457.307786 | 1124.189316 | 2094.082936 |             |
| 1793.810202  |              |             |             |             |             |
| CRYM-AS1     | CRYM-AS1     |             | 0           | 0.880336191 | 21.18614259 |
| 0            |              |             |             |             |             |
| RPL23P8      | RPL23P8      | 3.125034566 | 1.760672383 | 0           | 1.961520177 |
| VPS13A-AS1   | VPS13A-AS1   |             | 55.208944   | 70.42689532 |             |
| 70.24878858  | 63.74940576  |             |             |             |             |
| RPS10P7      | RPS10P7      | 15.62517283 | 17.60672383 | 25.64638313 |             |
| 13.73064124  |              |             |             |             |             |
| PTCD3        | PTCD3        | 9618.856394 | 7382.499301 | 9106.696133 |             |
| 9734.04388   |              |             |             |             |             |
| HGH1         | HGH1         | 163.5434756 | 148.7768164 | 169.4891407 |             |
| 184.3828967  |              |             |             |             |             |
| RPL19P12     | RPL19P12     |             | 11.45846008 | 14.96571525 |             |
| 4.460240545  | 4.903800443  |             |             |             |             |
| LOC652276    | LOC652276    |             | 159.3767629 | 228.0070736 |             |
| 228.5873279  | 292.2665064  |             |             |             |             |
| LOC153684    | LOC153684    |             | 151.0433374 | 181.3492554 |             |
| 451.5993552  | 170.6522554  |             |             |             |             |
| FICD         | FICD         | 602.0899931 | 400.5529671 | 664.5758412 |             |
| 435.4574794  |              |             |             |             |             |
| ZNF429       | ZNF429       | 346.8788368 | 175.1869021 | 1464.073959 |             |
| 628.6672168  |              |             |             |             |             |

|             |             |             |             |             |
|-------------|-------------|-------------|-------------|-------------|
| TTC38       | TTC38       | 2041.68925  | 1022.950654 | 1234.371571 |
| 930.7413241 |             |             |             |             |
| FGL2        | FGL2        | 257.2945126 | 208.6396774 | 73.59396899 |
| 52.96104479 |             |             |             |             |
| KLHL28      | KLHL28      | 1360.431714 | 1216.624617 | 2835.597927 |
| 1895.809251 |             |             |             |             |
| WNK4        | WNK4        | 2.083356377 | 8.803361914 | 15.61084191 |
| 8.826840798 |             |             |             |             |
| TNKS2       | TNKS2       | 3613.581637 | 4732.687365 | 5759.285604 |
| 5265.700916 |             |             |             |             |
| RUFY4       | RUFY4       | 19.79188559 | 7.042689532 | 45.71746559 |
| 39.23040355 |             |             |             |             |
| FAM226A     | FAM226A     | 0           | 1.760672383 | 2.230120273 |
|             |             |             |             | 0.980760089 |
| FAM226B     | FAM226B     | 0           | 1.760672383 | 2.230120273 |
|             |             |             |             | 0.980760089 |
| ZNF32       | ZNF32       | 468.7551849 | 441.0484319 | 1544.358289 |
| 1235.757712 |             |             |             |             |
| C11orf42    | C11orf42    |             | 1.041678189 | 0           |
|             |             |             |             | 2.230120273 |
|             |             | 1.961520177 |             |             |
| CLVS1       | CLVS1       | 17.70852921 | 35.21344766 | 39.02710477 |
| 31.38432284 |             |             |             |             |
| MIR328      | MIR328      | 0           | 0.880336191 | 0           |
|             |             |             |             | 0.980760089 |
| MIR330      | MIR330      | 0           | 1.760672383 | 2.230120273 |
|             |             |             |             | 4.903800443 |
| UQCRHL      | UQCRHL      | 600.0066367 | 471.8601986 | 401.4216491 |
| 373.6695938 |             |             |             |             |
| DLGAP3      | DLGAP3      | 8.33342551  | 13.20504287 | 8.92048109  |
| 16.67292151 |             |             |             |             |
| FKBP15      | FKBP15      | 3060.450518 | 3243.158529 | 2361.697369 |
| 2742.205208 |             |             |             |             |
| KLF13       | KLF13       | 1041.678189 | 2117.20854  | 1125.095677 |
| 1168.085266 |             |             |             |             |
| ATP6V1D     | ATP6V1D     | 3188.576936 | 2804.751106 | 2497.734705 |
| 2446.015661 |             |             |             |             |
| COL18A1     | COL18A1     | 172.9185793 | 783.4992104 | 121.5415549 |
| 586.494533  |             |             |             |             |
| SEPSECS-AS1 | SEPSECS-AS1 |             | 83.3342551  | 87.15328295 |
| 102.5855325 |             | 58.84560532 |             |             |
| KIF13B      | KIF13B      | 398.9627463 | 817.8323218 | 534.1138053 |
| 596.3021339 |             |             |             |             |
| IL22        | IL22        | 982.3025319 | 648.8077731 | 370.1999652 |
| 705.1665038 |             |             |             |             |
| PDCD2L      | PDCD2L      | 1078.136925 | 756.2087884 | 955.6065368 |
| 990.5676896 |             |             |             |             |
| PLXNA1      | PLXNA1      | 189.5854303 | 311.6390118 | 360.164424  |
| 369.7465534 |             |             |             |             |
| HGSNAT      | HGSNAT      | 585.423142  | 698.986936  | 1105.024595 |
| 1320.103079 |             |             |             |             |
| NRIP2       | NRIP2       | 56.25062219 | 62.50386959 | 166.1439603 |
| 86.3068878  |             |             |             |             |
| KAAG1       | KAAG1       | 1.041678189 | 0           | 0           |
|             |             |             | 0           | 0           |
| IFI27L2     | IFI27L2     | 1506.266661 | 2137.456273 | 831.8348617 |

|                 |               |             |             |             |  |
|-----------------|---------------|-------------|-------------|-------------|--|
| 1256.353674     |               |             |             |             |  |
| MT1E MT1E       | 2440.651996   | 2941.203216 | 1478.569741 |             |  |
| 1324.02612      |               |             |             |             |  |
| SIX4 SIX4       | 10.41678189   | 33.45277527 | 1.115060136 |             |  |
| 13.73064124     |               |             |             |             |  |
| PHOX2A PHOX2A   | 6.250069132   | 12.32470668 | 2.230120273 |             |  |
| 13.73064124     |               |             |             |             |  |
| PPM1J PPM1J     | 9.375103698   | 4.401680957 | 63.55842777 |             |  |
| 51.9802847      |               |             |             |             |  |
| ALDOC ALDOC     | 1317.722909   | 1502.733879 | 3001.741887 |             |  |
| 4660.571941     |               |             |             |             |  |
| LOC440600       | LOC440600     | 53.12558762 | 70.42689532 |             |  |
| 63.55842777     | 61.78788559   |             |             |             |  |
| SMA5 SMA5       | 91.66768061   | 108.2813515 | 105.9307129 |             |  |
| 72.57624656     |               |             |             |             |  |
| LOC400958       | LOC400958     | 6.250069132 | 2.641008574 | 0           |  |
| 0               |               |             |             |             |  |
| LOC646903       | LOC646903     | 0           | 2.641008574 | 3.345180409 |  |
| 0               |               |             |             |             |  |
| LPP-AS2 LPP-AS2 | 38.54209298   | 36.09378385 | 34.56686422 |             |  |
| 25.49976231     |               |             |             |             |  |
| MIR367 MIR367   | 3.125034566   | 0.880336191 | 1.115060136 |             |  |
| 11.76912106     |               |             |             |             |  |
| MIR302D MIR302D | 3.125034566   | 0.880336191 | 5.575300681 |             |  |
| 6.865320621     |               |             |             |             |  |
| MIR302C MIR302C | 4.166712755   | 0.880336191 | 2.230120273 |             |  |
| 0.980760089     |               |             |             |             |  |
| EEFSEC EEFSEC   | 1438.557579   | 1394.452527 | 1291.239638 |             |  |
| 1557.447021     |               |             |             |             |  |
| TRIM35 TRIM35   | 1469.807924   | 1577.562455 | 2076.241974 |             |  |
| 1590.792864     |               |             |             |             |  |
| MIR4453 MIR4453 | 4.166712755   | 3.521344766 | 7.805420954 |             |  |
| 12.74988115     |               |             |             |             |  |
| MIR301B MIR301B | 0 2.641008574 | 0           | 0.980760089 |             |  |
| MIR760 MIR760   | 0 0           | 1.115060136 | 2.942280266 |             |  |
| SMG1P2 SMG1P2   | 463.546794    | 478.022552  | 977.9077395 |             |  |
| 780.6850306     |               |             |             |             |  |
| SNORA23 SNORA23 | 9.375103698   | 4.401680957 | 11.15060136 |             |  |
| 11.76912106     |               |             |             |             |  |
| SMG1P5 SMG1P5   | 170.8352229   | 183.990264  | 342.3234618 |             |  |
| 234.4016612     |               |             |             |             |  |
| SNORD68 SNORD68 | 125.0013826   | 57.22185244 | 137.1523968 |             |  |
| 90.22992816     |               |             |             |             |  |
| SNORA65 SNORA65 | 10.41678189   | 8.803361914 | 17.84096218 |             |  |
| 20.59596186     |               |             |             |             |  |
| SNORD36A        | SNORD36A      | 38.54209298 | 45.77748195 |             |  |
| 80.28432981     | 63.74940576   |             |             |             |  |
| SNORD24 SNORD24 | 10.41678189   | 4.401680957 | 3.345180409 |             |  |
| 0.980760089     |               |             |             |             |  |
| MIR3115 MIR3115 | 2.083356377   | 4.401680957 | 3.345180409 |             |  |

|               |               |             |             |             |             |
|---------------|---------------|-------------|-------------|-------------|-------------|
| 0.980760089   |               |             |             |             |             |
| MIR2909       | MIR2909       | 0           | 0           | 6.690360818 | 1.961520177 |
| MIR1972-1     | MIR1972-1     |             |             | 1.041678189 | 1.760672383 |
|               |               |             |             |             | 0           |
| 0.980760089   |               |             |             |             |             |
| LINC00898     | LINC00898     | 0           | 0           | 0           | 0.980760089 |
| LOC442497     | LOC442497     | 0           | 0.880336191 |             | 2.230120273 |
|               |               |             |             |             | 0           |
| KIF9-AS1      | KIF9-AS1      | 54.16726581 |             | 62.50386959 |             |
| 72.47890886   | 63.74940576   |             |             |             |             |
| LOC283440     | LOC283440     | 1.041678189 |             | 0.880336191 |             |
| 1.115060136   | 0             |             |             |             |             |
| LINC01115     | LINC01115     | 1.041678189 |             | 0.880336191 | 0           |
|               |               |             |             |             |             |
| 5.884560532   |               |             |             |             |             |
| KANSL1-AS1    | KANSL1-AS1    | 2.083356377 |             | 1.760672383 |             |
| 1.115060136   | 0             |             |             |             |             |
| LOC643542     | LOC643542     | 0           | 0           | 7.805420954 |             |
| 1.961520177   |               |             |             |             |             |
| LOC389641     | LOC389641     | 32.29202385 |             | 165.503204  |             |
| 113.7361339   | 137.3064124   |             |             |             |             |
| MIR181A2HG    | MIR181A2HG    | 6.250069132 |             | 7.923025723 |             |
| 3.345180409   | 6.865320621   |             |             |             |             |
| FLJ39080      | FLJ39080      | 1.041678189 |             | 0.880336191 |             |
| 1.115060136   | 0             |             |             |             |             |
| MIR1-2        | MIR1-2        | 1.041678189 |             | 0           | 0           |
| DIRC3         | DIRC3         | 5.208390943 |             | 6.16235334  | 79.16926967 |
| 59.82636541   |               |             |             |             |             |
| LOC339529     | LOC339529     | 0           | 0.880336191 |             | 0           |
| 1.961520177   |               |             |             |             |             |
| LOC283177     | LOC283177     | 0           | 0           | 1.115060136 | 0           |
| INE1          | INE1          | 60.41733494 |             | 67.78588674 | 79.16926967 |
| 58.84560532   |               |             |             |             |             |
| MIR425        | MIR425        | 13.54181645 |             | 20.2477324  | 33.45180409 |
| 10.78836098   |               |             |             |             |             |
| LINC00485     | LINC00485     | 0           | 0           | 2.230120273 | 0           |
| SNORD2        | SNORD2        | 89.58432423 |             | 47.53815434 | 91.43493117 |
| 90.22992816   |               |             |             |             |             |
| TCL6          | TCL6          | 1.041678189 |             | 2.641008574 | 25.64638313 |
| 7.846080709   |               |             |             |             |             |
| MGC45922      | MGC45922      | 16.66685102 |             | 22.88874098 |             |
| 25.64638313   | 14.71140133   |             |             |             |             |
| SPATA41       | SPATA41       | 20.83356377 |             | 32.57243908 | 26.76144327 |
| 34.3266031    |               |             |             |             |             |
| MIR570        | MIR570        | 47.91719668 |             | 81.8712658  | 65.78854804 |
| 62.76864567   |               |             |             |             |             |
| MIR569        | MIR569        | 0           | 0           | 2.230120273 | 0           |
| SAMD12-AS1    | SAMD12-AS1    | 1.041678189 |             | 0           | 0           |
| 0.980760089   |               |             |             |             |             |
| C10orf111     | C10orf111     | 41.66712755 |             | 79.23025723 |             |
| 61.32830749   | 48.05724434   |             |             |             |             |
| DKFZP586I1420 | DKFZP586I1420 | 60.41733494 |             | 102.1189982 |             |

|                 |               |             |             |             |             |  |
|-----------------|---------------|-------------|-------------|-------------|-------------|--|
| 147.187938      | 127.4988115   |             |             |             |             |  |
| OR7E91P OR7E91P | 0 0           | 0           | 0.980760089 |             |             |  |
| LOC541473       | LOC541473     | 20.83356377 | 43.13647338 |             |             |  |
| 52.4078264      | 38.24964346   |             |             |             |             |  |
| MIR491 MIR491   | 4.166712755   | 4.401680957 | 1.115060136 |             |             |  |
| 3.923040355     |               |             |             |             |             |  |
| TMED11P TMED11P | 0 0.880336191 | 0           | 7.846080709 |             |             |  |
| ATP5I ATP5I     | 3493.788645   | 3793.368649 | 3367.481612 |             |             |  |
| 3075.663638     |               |             |             |             |             |  |
| STXBP6 STXBP6   | 6.250069132   | 3.521344766 | 1.115060136 | 0           |             |  |
| HNRNPA1P33      | HNRNPA1P33    | 0 0         | 2.230120273 | 0           |             |  |
| LOC641367       | LOC641367     | 30.20866747 | 22.88874098 |             |             |  |
| 10.03554123     | 5.884560532   |             |             |             |             |  |
| UQCRBP1 UQCRBP1 | 1.041678189   | 0.880336191 | 8.92048109  | 0           |             |  |
| KIAA0125        | KIAA0125      | 3.125034566 | 26.41008574 | 0           |             |  |
| 3.923040355     |               |             |             |             |             |  |
| RBM8A RBM8A     | 15772.04946   | 11500.712   | 14905.00884 |             |             |  |
| 14231.80965     |               |             |             |             |             |  |
| ZNF271 ZNF271   | 1636.476434   | 1520.340603 | 2074.011853 |             |             |  |
| 1786.944882     |               |             |             |             |             |  |
| FBX022-AS1      | FBX022-AS1    | 1980.230237 | 1059.924774 |             |             |  |
| 1450.693237     | 1324.02612    |             |             |             |             |  |
| CXorf23 CXorf23 | 279.1697546   | 499.1506205 | 403.6517693 |             |             |  |
| 550.2064097     |               |             |             |             |             |  |
| FTX FTX         | 135.4181645   | 169.0245488 | 212.976486  |             |             |  |
| 183.4021366     |               |             |             |             |             |  |
| MIR766 MIR766   | 0 0           | 2.230120273 | 1.961520177 |             |             |  |
| LOC100288846    | LOC100288846  | 22.91692015 | 52.82017149 |             |             |  |
| 23.41626286     | 6.865320621   |             |             |             |             |  |
| LINC00857       | LINC00857     | 0           | 1.760672383 | 0           |             |  |
| 3.923040355     |               |             |             |             |             |  |
| CPEB2-AS1       | CPEB2-AS1     | 1.041678189 | 2.641008574 |             |             |  |
| 8.92048109      | 2.942280266   |             |             |             |             |  |
| WASH7P WASH7P   | 96.87607155   | 154.9391697 | 86.97469063 |             |             |  |
| 92.19144833     |               |             |             |             |             |  |
| DMBT1P1 DMBT1P1 | 0 0           | 0           | 0.980760089 |             |             |  |
| FER1L6-AS1      | FER1L6-AS1    | 0           | 0           | 0           | 0.980760089 |  |
| NRON NRON       | 0 2.641008574 | 0           | 2.942280266 |             |             |  |
| GSTM2P1 GSTM2P1 | 0 2.641008574 | 0           | 0.980760089 |             |             |  |
| MIR1307 MIR1307 | 30.20866747   | 30.8117667  | 8.92048109  |             |             |  |
| 37.26888337     |               |             |             |             |             |  |
| LINC01089       | LINC01089     | 104.1678189 | 279.9469089 |             |             |  |
| 129.3469758     | 121.614251    |             |             |             |             |  |
| LINC00294       | LINC00294     | 80.20922053 | 132.0504287 |             |             |  |
| 79.16926967     | 103.9605694   |             |             |             |             |  |
| LOC441455       | LOC441455     | 2.083356377 | 0           | 17.84096218 |             |  |
| 4.903800443     |               |             |             |             |             |  |
| MYLIP MYLIP     | 338.5454113   | 648.8077731 | 1680.395625 |             |             |  |
| 1093.547499     |               |             |             |             |             |  |
| PPARGC1A        | PPARGC1A      | 0           | 0           | 4.460240545 | 0           |  |

|                 |               |               |               |   |
|-----------------|---------------|---------------|---------------|---|
| PREB PREB       | 10345.94777   | 6824.366156   | 6905.567424   |   |
| 7426.315391     |               |               |               |   |
| LINC00997       | LINC00997     | 5.208390943   | 16.72638764   |   |
| 1.115060136     | 8.826840798   |               |               |   |
| FOXN3-AS1       | FOXN3-AS1     | 172.9185793   | 106.5206792   |   |
| 161.6837198     | 133.3833721   |               |               |   |
| DLGAP1-AS5      | DLGAP1-AS5    | 0 0           | 17.84096218   |   |
| 7.846080709     |               |               |               |   |
| FGF14-IT1       | FGF14-IT1     | 0 0.880336191 | 2.230120273   |   |
| 1.961520177     |               |               |               |   |
| SBF2-AS1        | SBF2-AS1      | 98.95942793   | 145.2554716   |   |
| 224.1270874     | 315.8047486   |               |               |   |
| GTSE1-AS1       | GTSE1-AS1     | 31.25034566   | 55.46118006   |   |
| 41.25722504     | 25.49976231   |               |               |   |
| WWC2-AS2        | WWC2-AS2      | 0 0           | 5.575300681   |   |
| 0.980760089     |               |               |               |   |
| SMCR5 SMCR5     | 0 0           | 6.690360818   | 4.903800443   |   |
| LINC00476       | LINC00476     | 764.5917905   | 407.5956566   |   |
| 782.7722157     | 391.3232754   |               |               |   |
| FAM35BP FAM35BP | 1.041678189   | 2.641008574   | 4.460240545   |   |
| 2.942280266     |               |               |               |   |
| TEX26 TEX26     | 0 0           | 0 0.980760089 |               |   |
| HOXB13 HOXB13   | 1.041678189   | 0 0           | 0             |   |
| EIF3M EIF3M     | 12656.38999   | 9593.903814   | 11814.06214   |   |
| 11116.91561     |               |               |               |   |
| TRPV6 TRPV6     | 2.083356377   | 4.401680957   | 0 0.980760089 |   |
| SHISA8 SHISA8   | 4.166712755   | 7.042689532   | 8.92048109    |   |
| 41.19192372     |               |               |               |   |
| UNC13B UNC13B   | 22.91692015   | 92.4353001    | 121.5415549   |   |
| 155.9408541     |               |               |               |   |
| NPHP3-AS1       | NPHP3-AS1     | 10.41678189   | 7.923025723   |   |
| 6.690360818     | 17.6536816    |               |               |   |
| RPL13AP6        | RPL13AP6      | 3.125034566   | 4.401680957   |   |
| 8.92048109      | 6.865320621   |               |               |   |
| LINC00410       | LINC00410     | 0 0           | 1.115060136   | 0 |
| LOC152225       | LOC152225     | 3.125034566   | 0 0           | 0 |
| MIR1244-2       | MIR1244-2     | 10468.8658    | 10568.43598   |   |
| 10111.36532     | 10123.40564   |               |               |   |
| DNM1P35 DNM1P35 | 0 0           | 1.115060136   | 2.942280266   |   |
| POM121L10P      | POM121L10P    | 4.166712755   | 5.282017149   | 0 |
| 5.884560532     |               |               |               |   |
| MIR4523 MIR4523 | 0 3.521344766 | 1.115060136   | 0             |   |
| MIR4521 MIR4521 | 0 0           | 1.115060136   | 0             |   |
| MIR4520-1       | MIR4520-1     | 0 3.521344766 | 1.115060136   |   |
| 0               |               |               |               |   |
| MIR4519 MIR4519 | 5.208390943   | 5.282017149   | 3.345180409   |   |
| 4.903800443     |               |               |               |   |
| MIR4518 MIR4518 | 5.208390943   | 1.760672383   | 2.230120273   |   |
| 4.903800443     |               |               |               |   |
| MIR4517 MIR4517 | 6.250069132   | 14.08537906   | 7.805420954   |   |

|                 |                |                 |             |  |
|-----------------|----------------|-----------------|-------------|--|
| 13.73064124     |                |                 |             |  |
| LARP4B LARP4B   | 6088.609013    | 7243.406183     | 6003.483774 |  |
| 5712.927516     |                |                 |             |  |
| RIC8B RIC8B     | 626.0485914    | 489.4669224     | 866.4017259 |  |
| 595.3213738     |                |                 |             |  |
| TTC17 TTC17     | 3512.538852    | 3039.800869     | 3613.909902 |  |
| 3923.040355     |                |                 |             |  |
| WDR73 WDR73     | 1795.853197    | 1200.778565     | 1659.209483 |  |
| 1605.504265     |                |                 |             |  |
| LOC729609       | LOC729609      | 5.208390943     | 4.401680957 |  |
| 8.92048109      | 4.903800443    |                 |             |  |
| FLJ42627        | FLJ42627       | 33.33370204     | 36.97412004 |  |
| 22.30120273     | 20.59596186    |                 |             |  |
| LOC100128573    | LOC100128573   | 1.041678189     | 8.803361914 |  |
| 2.230120273     | 8.826840798    |                 |             |  |
| LINC00909       | LINC00909      | 757.3000432     | 643.5257559 |  |
| 1462.958899     | 931.7220842    |                 |             |  |
| PAXIP10S        | PAXIP10S       | 508.3389561     | 442.8091043 |  |
| 705.8330663     | 655.1477392    |                 |             |  |
| MIR5010 MIR5010 | 94.79271517    | 55.46118006     | 34.56686422 |  |
| 68.65320621     |                |                 |             |  |
| MIR5001 MIR5001 | 29.16698928    | 40.49546481     | 30.10662368 |  |
| 52.96104479     |                |                 |             |  |
| MIR4999 MIR4999 | 0 0            | 0 1.961520177   |             |  |
| MIR5006 MIR5006 | 9.375103698    | 24.64941336     | 28.99156354 |  |
| 23.53824213     |                |                 |             |  |
| LOC100996251    | LOC100996251   | 35.41705842     | 12.32470668 |  |
| 51.29276627     | 22.55748204    |                 |             |  |
| CTAGE4 CTAGE4   | 0 0            | 2.230120273     | 0.980760089 |  |
| PCSK4 PCSK4     | 2.083356377    | 14.96571525     | 23.41626286 |  |
| 24.51900222     |                |                 |             |  |
| HIF1AN HIF1AN   | 6941.743449    | 7193.22702      | 6057.00666  |  |
| 6357.286895     |                |                 |             |  |
| MREG MREG       | 900.009955     | 936.6777077     | 799.4981177 |  |
| 838.5498758     |                |                 |             |  |
| LOC729737       | LOC729737      | 7.291747321     | 42.25613719 |  |
| 8.92048109      | 12.74988115    |                 |             |  |
| TSIX TSIX       | 1130.220835    | 0 1631.332979 0 |             |  |
| LINC00888       | LINC00888      | 271.8780073     | 403.1939757 |  |
| 117.0813143     | 304.0356275    |                 |             |  |
| KLHL7-AS1       | KLHL7-AS1      | 2.083356377     | 30.8117667  |  |
| 13.38072164     | 36.28812328    |                 |             |  |
| MGC27345        | MGC27345       | 412.5045627     | 458.6551557 |  |
| 900.9685901     | 532.5527281    |                 |             |  |
| TMEM256-PLSCR3  | TMEM256-PLSCR3 | 5692.771301     | 5214.231262 |  |
| 3571.537616     | 4618.399258    |                 |             |  |
| FAM175A FAM175A | 3033.366885    | 3410.422406     | 3280.506921 |  |
| 3346.353423     |                |                 |             |  |
| MIR4734 MIR4734 | 4.166712755    | 2.641008574     | 2.230120273 |  |
| 0.980760089     |                |                 |             |  |

|              |              |             |             |             |             |   |
|--------------|--------------|-------------|-------------|-------------|-------------|---|
| MIR4730      | MIR4730      | 1.041678189 | 0           | 0           | 0           |   |
| MIR4728      | MIR4728      | 1.041678189 | 0           | 2.230120273 | 0.980760089 |   |
| MIR4727      | MIR4727      | 4.166712755 | 0           | 1.115060136 | 0           |   |
| ZBTB39       | ZBTB39       | 536.4642672 | 467.4585177 | 850.790884  |             |   |
| 796.377192   |              |             |             |             |             |   |
| HERC2P10     | HERC2P10     |             | 43.75048393 | 30.8117667  |             |   |
| 59.09818722  | 33.34584301  |             |             |             |             |   |
| RAD51-AS1    | RAD51-AS1    |             | 173.9602575 | 225.366065  |             |   |
| 297.7210564  | 335.4199503  |             |             |             |             |   |
| FGF2         | FGF2         | 255.2111562 | 280.8272451 | 144.9578177 |             |   |
| 189.2866971  |              |             |             |             |             |   |
| FA2H         | FA2H         | 0           | 7.042689532 | 4.460240545 | 0.980760089 |   |
| TDRD9        | TDRD9        | 138.5431991 | 40.49546481 | 33.45180409 |             |   |
| 61.78788559  |              |             |             |             |             |   |
| CXCR6        | CXCR6        | 11246.9994  | 7393.063336 | 2914.767196 |             |   |
| 7735.254819  |              |             |             |             |             |   |
| GNG8         | GNG8         | 372.9207916 | 135.5717735 | 510.6975424 |             |   |
| 392.3040355  |              |             |             |             |             |   |
| AVPI1        | AVPI1        | 118.7513135 | 70.42689532 | 247.5433503 |             |   |
| 152.9985738  |              |             |             |             |             |   |
| FBXL15       | FBXL15       | 1018.761269 | 1012.38662  | 1025.855325 |             |   |
| 1039.605694  |              |             |             |             |             |   |
| TMEM119      | TMEM119      | 10.41678189 | 22.00840479 | 7.805420954 |             |   |
| 3.923040355  |              |             |             |             |             |   |
| ZNF776       | ZNF776       | 560.4228655 | 938.4383801 | 1035.890867 |             |   |
| 972.914008   |              |             |             |             |             |   |
| SAMSN1-AS1   | SAMSN1-AS1   |             | 9.375103698 | 1.760672383 |             |   |
| 7.805420954  | 2.942280266  |             |             |             |             |   |
| LINC00551    | LINC00551    |             | 0           | 0           | 5.575300681 | 0 |
| C8orf31      | C8orf31      | 98.95942793 | 55.46118006 | 88.08975076 |             |   |
| 42.17268381  |              |             |             |             |             |   |
| LOC101928053 | LOC101928053 |             | 19.79188559 | 42.25613719 |             |   |
| 49.062646    | 38.24964346  |             |             |             |             |   |
| NAV2-AS2     | NAV2-AS2     |             | 5.208390943 | 0.880336191 |             | 0 |
| 1.961520177  |              |             |             |             |             |   |
| CARD17       | CARD17       | 150.0016592 | 117.0847135 | 51.29276627 |             |   |
| 60.8071255   |              |             |             |             |             |   |
| PTRHD1       | PTRHD1       | 1546.89211  | 1526.502956 | 898.7384698 |             |   |
| 920.9337233  |              |             |             |             |             |   |
| KLHDC10      | KLHDC10      | 195.8354995 | 460.4158281 | 369.0849051 |             |   |
| 200.0750581  |              |             |             |             |             |   |
| FTH1         | FTH1         | 124835.7558 | 80163.41359 | 80343.428   |             |   |
| 56748.74025  |              |             |             |             |             |   |
| TMEM244      | TMEM244      | 11.45846008 | 6.16235334  | 16.72590204 |             |   |
| 1.961520177  |              |             |             |             |             |   |
| MIR3620      | MIR3620      | 241.6693398 | 173.4262297 | 277.6499739 |             |   |
| 210.8634191  |              |             |             |             |             |   |
| MIR23C       | MIR23C       | 0           | 0.880336191 | 0           |             |   |
| MIR4737      | MIR4737      | 13.54181645 | 9.683698106 | 12.2656615  |             |   |
| 17.6536816   |              |             |             |             |             |   |



|              |              |             |             |             |             |
|--------------|--------------|-------------|-------------|-------------|-------------|
| MIR4736      | MIR4736      | 7.291747321 | 6.16235334  | 5.575300681 |             |
| 2.942280266  |              |             |             |             |             |
| HES5         | HES5         | 0           | 1.760672383 | 0           | 0.980760089 |
| PLEKHA8P1    | PLEKHA8P1    |             | 205.2106032 | 220.9643841 |             |
| 162.7987799  | 236.3631814  |             |             |             |             |
| LOC100289473 | LOC100289473 | 0           | 0.880336191 | 0           | 0           |
| ATP6V0CP3    | ATP6V0CP3    | 0           | 0.880336191 | 0           | 0           |
| FOXN3-AS2    | FOXN3-AS2    | 0           | 0.880336191 | 0           |             |
| 0.980760089  |              |             |             |             |             |
| LOC100129550 | LOC100129550 | 3.125034566 |             | 5.282017149 |             |
| 15.61084191  | 14.71140133  |             |             |             |             |
| LOC100131496 | LOC100131496 | 18.7502074  |             | 0.880336191 |             |
| 1.115060136  | 3.923040355  |             |             |             |             |
| LOC100630918 | LOC100630918 | 108.3345316 |             | 141.7341268 |             |
| 112.6210738  | 115.7296905  |             |             |             |             |
| CYP2D7P      | CYP2D7P      | 10.41678189 | 11.44437049 | 7.805420954 |             |
| 13.73064124  |              |             |             |             |             |
| LOC642423    | LOC642423    | 2.083356377 |             | 6.16235334  |             |
| 1.115060136  | 3.923040355  |             |             |             |             |
| NAPA-AS1     | NAPA-AS1     | 2517.736182 |             | 1502.733879 |             |
| 3245.940057  | 1802.637043  |             |             |             |             |
| LOC100506746 | LOC100506746 | 37.50041479 |             | 46.65781815 |             |
| 42.37228518  | 45.11496408  |             |             |             |             |
| LINC00693    | LINC00693    | 0           | 0           | 0           | 1.961520177 |
| LOC574538    | LOC574538    | 1.041678189 |             | 0.880336191 |             |
| 6.690360818  | 0.980760089  |             |             |             |             |
| HERC2P7      | HERC2P7      | 25.00027653 | 11.44437049 | 26.76144327 |             |
| 3.923040355  |              |             |             |             |             |
| LINC00987    | LINC00987    | 63.54236951 |             | 44.01680957 |             |
| 17.84096218  | 54.92256497  |             |             |             |             |
| HERC2P3      | HERC2P3      | 255.2111562 | 41.375801   | 227.4722678 |             |
| 38.24964346  |              |             |             |             |             |
| PTDSS2       | PTDSS2       | 1111.470627 | 883.8575362 | 950.0312361 |             |
| 850.3189969  |              |             |             |             |             |
| FOXL1        | FOXL1        | 0           | 1.760672383 | 0           | 0.980760089 |
| DSCR9        | DSCR9        | 21.87524196 | 15.84605145 | 26.76144327 |             |
| 15.69216142  |              |             |             |             |             |
| MIR19B1      | MIR19B1      | 2.083356377 | 0.880336191 | 0           | 0           |
| LINC01270    | LINC01270    | 44.79216211 |             | 31.69210289 |             |
| 6.690360818  | 7.846080709  |             |             |             |             |
| NDUFA6-AS1   | NDUFA6-AS1   | 53.12558762 |             | 69.54655912 |             |
| 49.062646    | 71.59548647  |             |             |             |             |
| FAM172BP     | FAM172BP     | 276.04472   |             | 285.228926  |             |
| 289.9156354  | 491.3608044  |             |             |             |             |
| LINC01225    | LINC01225    | 0           | 0           | 4.460240545 |             |
| 2.942280266  |              |             |             |             |             |
| YPEL4        | YPEL4        | 2.083356377 | 7.923025723 | 16.72590204 |             |
| 9.807600887  |              |             |             |             |             |
| ZNF365       | ZNF365       | 19.79188559 | 9.683698106 | 41.25722504 |             |
| 90.22992816  |              |             |             |             |             |

|                 |                 |             |             |             |   |
|-----------------|-----------------|-------------|-------------|-------------|---|
| STAU2-AS1       | STAU2-AS1       | 2.083356377 | 0           | 0           | 0 |
| APOC4-APOC2     | APOC4-APOC2     | 2.083356377 | 0.880336191 |             | 0 |
| 0               |                 |             |             |             |   |
| SLM02-ATP5E     | SLM02-ATP5E     | 14387.65914 | 18222.07883 |             |   |
| 13792.17883     | 13039.20538     |             |             |             |   |
| P2RX5-TAX1BP3   | P2RX5-TAX1BP3   | 8666.76253  | 8623.773331 |             |   |
| 4875.042916     | 5364.757685     |             |             |             |   |
| BEND3P3 BEND3P3 | 72.91747321     | 41.375801   | 57.98312709 |             |   |
| 66.69168603     |                 |             |             |             |   |
| LOC100271832    | LOC100271832    | 0           | 0           | 2.942280266 |   |
| LINC00893       | LINC00893       | 17.70852921 | 28.17075813 |             |   |
| 31.22168382     | 17.6536816      |             |             |             |   |
| LINC00657       | LINC00657       | 1540.642041 | 2415.642509 |             |   |
| 2769.809378     | 2048.807825     |             |             |             |   |
| ZNF738 ZNF738   | 515.6307034     | 505.3129739 | 545.2644066 |             |   |
| 456.0534412     |                 |             |             |             |   |
| AMZ2P1 AMZ2P1   | 502.088887      | 465.6978453 | 714.7535473 |             |   |
| 390.3425153     |                 |             |             |             |   |
| AFAP1-AS1       | AFAP1-AS1       | 39.58377117 | 43.13647338 |             |   |
| 80.28432981     | 150.0562936     |             |             |             |   |
| GOLGA2P7        | GOLGA2P7        | 8.33342551  | 40.49546481 |             |   |
| 15.61084191     | 29.42280266     |             |             |             |   |
| FLJ10038        | FLJ10038        | 669.7990753 | 912.0282943 |             |   |
| 758.2408927     | 727.7239858     |             |             |             |   |
| RPSAP9 RPSAP9   | 58.33397857     | 52.82017149 | 72.47890886 |             |   |
| 63.74940576     |                 |             |             |             |   |
| FLJ43681        | FLJ43681        | 3.125034566 | 1.760672383 |             |   |
| 12.2656615      | 1.961520177     |             |             |             |   |
| LIMS3-LOC440895 | LIMS3-LOC440895 | 1.041678189 | 0           | 3.345180409 |   |
| 0.980760089     |                 |             |             |             |   |
| 9-Mar 9-Mar     | 20.83356377     | 126.7684116 | 93.66505145 |             |   |
| 107.8836098     |                 |             |             |             |   |
| CREB3L2 CREB3L2 | 1141.679295     | 2424.445871 | 1505.331184 |             |   |
| 1424.063649     |                 |             |             |             |   |
| TRMT5 TRMT5     | 1004.177774     | 965.728802  | 966.7571381 |             |   |
| 1193.585028     |                 |             |             |             |   |
| LOC440895       | LOC440895       | 0           | 0           | 2.230120273 | 0 |
| PRH1 PRH1       | 952.0938645     | 758.849797  | 894.2782293 |             |   |
| 839.5306359     |                 |             |             |             |   |
| CTAGE11P        | CTAGE11P        | 2.083356377 | 0           | 1.115060136 |   |
| 0               |                 |             |             |             |   |
| TMEM51-AS1      | TMEM51-AS1      | 0           | 3.521344766 | 0           | 0 |
| GUSBP3 GUSBP3   | 98.95942793     | 77.46958485 | 107.0457731 |             |   |
| 103.9605694     |                 |             |             |             |   |
| A2M-AS1 A2M-AS1 | 0               | 0           | 2.230120273 | 26.48052239 |   |
| LOC100132215    | LOC100132215    | 77.08418596 | 87.15328295 |             |   |
| 119.3114346     | 96.11448869     |             |             |             |   |
| SNORA80B        | SNORA80B        | 30.20866747 | 36.09378385 |             |   |
| 60.21324736     | 18.63444168     |             |             |             |   |
| LINC00662       | LINC00662       | 203.1272468 | 180.4689192 |             |   |

|                 |              |             |             |             |   |
|-----------------|--------------|-------------|-------------|-------------|---|
| 330.0578003     | 336.4007104  |             |             |             |   |
| FAM35DP FAM35DP | 6.250069132  | 4.401680957 | 40.14216491 |             |   |
| 8.826840798     |              |             |             |             |   |
| MIR4271 MIR4271 | 13.54181645  | 14.08537906 | 20.07108245 |             |   |
| 5.884560532     |              |             |             |             |   |
| FLJ42351        | FLJ42351     | 9.375103698 | 15.84605145 |             |   |
| 12.2656615      | 13.73064124  |             |             |             |   |
| CYP1B1-AS1      | CYP1B1-AS1   | 10.41678189 | 14.08537906 | 0           |   |
|                 | 0.980760089  |             |             |             |   |
| GNN GNN         | 5.208390943  | 13.20504287 | 31.22168382 |             |   |
| 29.42280266     |              |             |             |             |   |
| ANKRD26P3       | ANKRD26P3    | 0           | 1.760672383 | 0           |   |
| 1.961520177     |              |             |             |             |   |
| LINC01106       | LINC01106    | 0           | 0           | 1.115060136 | 0 |
| C21orf128       | C21orf128    | 0           | 1.760672383 | 0           | 0 |
| LOC654342       | LOC654342    | 55.208944   | 219.2037117 |             |   |
| 37.91204463     | 122.5950111  |             |             |             |   |
| LOC728743       | LOC728743    | 443.7549084 | 628.5600407 |             |   |
| 653.4252399     | 505.0914457  |             |             |             |   |
| INAFM1 INAFM1   | 170.8352229  | 243.853125  | 183.9849225 |             |   |
| 195.1712576     |              |             |             |             |   |
| PCDHGA6 PCDHGA6 | 5.208390943  | 4.401680957 | 33.45180409 |             |   |
| 11.76912106     |              |             |             |             |   |
| TMEM170A        | TMEM170A     | 1415.640658 | 1035.275361 |             |   |
| 1446.232997     | 1262.238234  |             |             |             |   |
| ZG16B ZG16B     | 126.0430608  | 125.0077392 | 104.8156528 |             |   |
| 56.88408514     |              |             |             |             |   |
| ACAP3 ACAP3     | 715.6329156  | 1267.684116 | 521.8481438 |             |   |
| 689.4743423     |              |             |             |             |   |
| RAP2C-AS1       | RAP2C-AS1    | 40.62544936 | 30.8117667  |             |   |
| 54.63794668     | 70.61472638  |             |             |             |   |
| NME5 NME5       | 0            | 2.641008574 | 0           | 0           |   |
| PGBD2 PGBD2     | 682.2992136  | 529.9623872 | 994.6336415 |             |   |
| 759.1083086     |              |             |             |             |   |
| TSKS TSKS       | 14.58349464  | 37.85445623 | 0           | 37.26888337 |   |
| TUBA1C TUBA1C   | 16980.39615  | 13642.56996 | 13962.78303 |             |   |
| 15021.32152     |              |             |             |             |   |
| APOL6 APOL6     | 4208.379882  | 6496.881093 | 17528.74534 |             |   |
| 7179.163849     |              |             |             |             |   |
| LINC00534       | LINC00534    | 0           | 0           | 1.115060136 | 0 |
| RPARP-AS1       | RPARP-AS1    | 252.0861217 | 335.4080889 |             |   |
| 418.1475511     | 575.706172   |             |             |             |   |
| SENCR SENCN     | 17.70852921  | 73.06790389 | 8.92048109  |             |   |
| 23.53824213     |              |             |             |             |   |
| MIR4458HG       | MIR4458HG    | 177.0852921 | 153.1784973 |             |   |
| 129.3469758     | 152.9985738  |             |             |             |   |
| LOC100130899    | LOC100130899 | 0           | 1.760672383 | 2.230120273 |   |
|                 | 4.903800443  |             |             |             |   |
| FLJ22447        | FLJ22447     | 30.20866747 | 28.17075813 |             |   |
| 10.03554123     | 34.3266031   |             |             |             |   |

|                |                |             |             |             |   |
|----------------|----------------|-------------|-------------|-------------|---|
| PLEKHA7        | PLEKHA7        | 166.6685102 | 286.1092622 | 43.48734531 |   |
| 216.7479796    |                |             |             |             |   |
| MIR3911        | MIR3911        | 25.00027653 | 28.17075813 | 33.45180409 |   |
| 37.26888337    |                |             |             |             |   |
| MIR3912        | MIR3912        | 0           | 0           | 0.980760089 |   |
| MIR3917        | MIR3917        | 3040.658633 | 3296.859037 | 1567.774552 |   |
| 2489.169105    |                |             |             |             |   |
| MIR3916        | MIR3916        | 23.95859834 | 43.13647338 | 42.37228518 |   |
| 47.07648426    |                |             |             |             |   |
| MIR3907        | MIR3907        | 0           | 2.641008574 | 0           | 0 |
| SERF2-C150RF63 | SERF2-C150RF63 | 12204.30166 |             | 11700.54832 |   |
| 9942.991235    | 10692.24649    |             |             |             |   |
| LOC100506071   | LOC100506071   | 72.91747321 |             | 46.65781815 |   |
| 25.64638313    | 51.9802847     |             |             |             |   |
| LOC100505715   | LOC100505715   | 31.25034566 |             | 29.93143051 |   |
| 149.4180583    | 85.32612771    |             |             |             |   |
| STX17-AS1      | STX17-AS1      | 3.125034566 |             | 5.282017149 |   |
| 13.38072164    | 8.826840798    |             |             |             |   |
| LOC100505912   | LOC100505912   | 1.041678189 |             | 1.760672383 | 0 |
| 0.980760089    |                |             |             |             |   |
| C1orf56        | C1orf56        | 340.6287677 | 887.378881  | 333.4029807 |   |
| 334.4391902    |                |             |             |             |   |
| PYURF          | PYURF          | 8515.719193 | 5671.125745 | 10522.82251 |   |
| 7042.838197    |                |             |             |             |   |
| FAM73B         | FAM73B         | 1317.722909 | 1282.649831 | 1765.140196 |   |
| 1333.833721    |                |             |             |             |   |
| LINC01136      | LINC01136      | 33.33370204 |             | 33.45277527 |   |
| 36.7969845     | 23.53824213    |             |             |             |   |
| FLJ21408       | FLJ21408       | 52.08390943 |             | 31.69210289 |   |
| 207.4011853    | 128.4795716    |             |             |             |   |
| APCDD1L-AS1    | APCDD1L-AS1    | 0           | 1.760672383 | 0           |   |
| 1.961520177    |                |             |             |             |   |
| MIR125A        | MIR125A        | 0           | 0           | 4.903800443 |   |
| CASC14         | CASC14         | 10.41678189 | 13.20504287 | 5.575300681 |   |
| 6.865320621    |                |             |             |             |   |
| MIR3136        | MIR3136        | 0           | 0.880336191 | 0           | 0 |
| GUCY1B3        | GUCY1B3        | 63.54236951 | 153.1784973 | 24.531323   |   |
| 81.40308736    |                |             |             |             |   |
| CFLAR-AS1      | CFLAR-AS1      | 3143.784773 |             | 2337.292588 |   |
| 2725.206973    | 2827.531336    |             |             |             |   |
| TUBA1B         | TUBA1B         | 224658.735  | 153075.498  | 139694.7339 |   |
| 159814.8564    |                |             |             |             |   |
| TTI1           | TTI1           | 4940.679649 | 5164.932435 | 3927.2418   |   |
| 4716.475266    |                |             |             |             |   |
| SAFB2          | SAFB2          | 3242.744201 | 2469.343017 | 3723.185795 |   |
| 2781.435611    |                |             |             |             |   |
| ASPRV1         | ASPRV1         | 47.91719668 | 59.86286102 | 22.30120273 |   |
| 67.67244612    |                |             |             |             |   |
| SH3PXD2A       | SH3PXD2A       | 148.959981  |             | 448.9714576 |   |
| 226.3572077    | 216.7479796    |             |             |             |   |

|               |               |             |             |             |             |  |
|---------------|---------------|-------------|-------------|-------------|-------------|--|
| NPPC          | NPPC          | 1.041678189 | 3.521344766 | 0           | 0           |  |
| ODF1          | ODF1          | 2.083356377 | 1.760672383 | 0           | 2.942280266 |  |
| LOC100128239  | LOC100128239  | 1.041678189 | 9.683698106 |             |             |  |
| 7.805420954   | 12.74988115   |             |             |             |             |  |
| LRRC37A6P     | LRRC37A6P     | 6.250069132 | 3.521344766 |             |             |  |
| 33.45180409   | 8.826840798   |             |             |             |             |  |
| ARHGAP5-AS1   | ARHGAP5-AS1   | 1.041678189 | 2.641008574 |             |             |  |
| 23.41626286   | 21.57672195   |             |             |             |             |  |
| OR13A1        | OR13A1        | 3.125034566 | 1.760672383 | 5.575300681 | 0           |  |
| CERS6-AS1     | CERS6-AS1     | 878.1347131 | 1838.141968 |             |             |  |
| 972.3324388   | 1176.912106   |             |             |             |             |  |
| MIR3714       | MIR3714       | 0           | 1.760672383 | 3.345180409 | 0           |  |
| MIR3692       | MIR3692       | 0           | 0.880336191 | 0           | 0           |  |
| MIR4306       | MIR4306       | 1.041678189 | 0           | 0           | 0.980760089 |  |
| MIR4298       | MIR4298       | 0           | 0           | 2.942280266 |             |  |
| MIR3677       | MIR3677       | 0           | 0.880336191 | 0           | 1.961520177 |  |
| MIR3671       | MIR3671       | 1.041678189 | 2.641008574 | 33.45180409 |             |  |
| 8.826840798   |               |             |             |             |             |  |
| MIR3665       | MIR3665       | 63.54236951 | 44.89714576 | 33.45180409 |             |  |
| 45.11496408   |               |             |             |             |             |  |
| MIR3662       | MIR3662       | 9.375103698 | 1.760672383 | 2.230120273 | 0           |  |
| MIR3661       | MIR3661       | 2970.866194 | 2125.131566 | 2307.059422 |             |  |
| 2203.767919   |               |             |             |             |             |  |
| LOC100506274  | LOC100506274  | 10.41678189 | 7.042689532 |             |             |  |
| 25.64638313   | 12.74988115   |             |             |             |             |  |
| MAP2K4P1      | MAP2K4P1      | 32.29202385 | 35.21344766 |             |             |  |
| 3.345180409   | 13.73064124   |             |             |             |             |  |
| LINC00466     | LINC00466     | 0           | 0           | 2.230120273 | 0           |  |
| FKBP1A-SDCBP2 | FKBP1A-SDCBP2 | 863.5512184 | 1528.263628 |             |             |  |
| 761.5860731   | 717.9163849   |             |             |             |             |  |
| MTBP          | MTBP          | 1181.263066 | 990.3782154 | 735.9396899 |             |  |
| 999.3945304   |               |             |             |             |             |  |
| FEM1B         | FEM1B         | 2383.359696 | 3086.458687 | 3621.715323 |             |  |
| 2520.553428   |               |             |             |             |             |  |
| CDK12         | CDK12         | 688.5492827 | 1264.162771 | 1120.635437 |             |  |
| 847.3767166   |               |             |             |             |             |  |
| MATN1-AS1     | MATN1-AS1     | 50.00055306 | 18.48706002 |             |             |  |
| 147.187938    | 180.4598563   |             |             |             |             |  |
| KRT6B         | KRT6B         | 1.041678189 | 0.880336191 | 0           | 0           |  |
| MRPL41        | MRPL41        | 3296.911467 | 3273.970296 | 2172.137145 |             |  |
| 2463.669343   |               |             |             |             |             |  |
| MRPS6         | MRPS6         | 7678.209929 | 6954.655912 | 6332.426514 |             |  |
| 6488.708747   |               |             |             |             |             |  |
| LINC00578     | LINC00578     | 1.041678189 | 0           | 2.230120273 |             |  |
| 0             |               |             |             |             |             |  |
| GOLGA6L7P     | GOLGA6L7P     | 0           | 1.760672383 | 0           |             |  |
| 1.961520177   |               |             |             |             |             |  |
| MIR4641       | MIR4641       | 0           | 0           | 1.115060136 | 0.980760089 |  |
| LINC01277     | LINC01277     | 0           | 1.760672383 | 0           |             |  |
| 8.826840798   |               |             |             |             |             |  |

|              |              |             |             |             |
|--------------|--------------|-------------|-------------|-------------|
| LOC100130452 | LOC100130452 | 1.041678189 | 1.760672383 | 0           |
| 1.961520177  |              |             |             |             |
| PPP1R2P3     | PPP1R2P3     | 20.83356377 | 11.44437049 |             |
| 18.95602232  | 17.6536816   |             |             |             |
| ENTPD1-AS1   | ENTPD1-AS1   | 1323.972978 | 668.1751693 |             |
| 532.9987451  | 335.4199503  |             |             |             |
| LOC100132287 | LOC100132287 | 0           | 2.641008574 | 0           |
| 0.980760089  |              |             |             |             |
| PAXIP1-AS1   | PAXIP1-AS1   | 212.5023505 | 272.9042193 |             |
| 389.1559876  | 339.3429907  |             |             |             |
| LOC400654    | LOC400654    | 0           | 0           | 1.115060136 |
| MIR1178      | MIR1178      | 28.12531109 | 116.2043773 | 25.64638313 |
| 31.38432284  |              |             |             |             |
| MIR1248      | MIR1248      | 61.45901313 | 55.46118006 | 133.8072164 |
| 92.19144833  |              |             |             |             |
| MIR1291      | MIR1291      | 4.166712755 | 5.282017149 | 2.230120273 |
| 4.903800443  |              |             |             |             |
| LOC100129345 | LOC100129345 | 0           | 3.521344766 | 0           |
| 7.846080709  |              |             |             |             |
| NLE1         | NLE1         | 1263.555643 | 824.8750114 | 1080.493272 |
| 1137.681703  |              |             |             |             |
| MIR1229      | MIR1229      | 5.208390943 | 0.880336191 | 4.460240545 |
| 6.865320621  |              |             |             |             |
| MIR1227      | MIR1227      | 27.08363291 | 20.2477324  | 24.531323   |
| 26.48052239  |              |             |             |             |
| MIR1234      | MIR1234      | 0           | 0.880336191 | 3.345180409 |
|              |              |             |             | 5.884560532 |
| SSSCA1-AS1   | SSSCA1-AS1   | 32.29202385 | 28.17075813 |             |
| 84.74457036  | 56.88408514  |             |             |             |
| C2orf27A     | C2orf27A     | 93.75103698 | 67.78588674 |             |
| 76.9391494   | 86.3068878   |             |             |             |
| GPR171       | GPR171       | 7730.293838 | 7106.073737 | 7909.121547 |
| 6043.443666  |              |             |             |             |
| SLC30A4      | SLC30A4      | 98.95942793 | 136.4521097 | 165.0289002 |
| 102.9798093  |              |             |             |             |
| TNFRSF13B    | TNFRSF13B    | 18.7502074  | 1.760672383 | 0           |
| 9.807600887  |              |             |             |             |
| DNAJC1       | DNAJC1       | 1167.72125  | 1249.197056 | 1289.009518 |
| 989.5869295  |              |             |             |             |
| GIMAP1       | GIMAP1       | 2019.814008 | 2248.378633 | 2326.015444 |
| 2183.171957  |              |             |             |             |
| LOC100129148 | LOC100129148 | 2425.026823 | 1978.115422 |             |
| 2214.509431  | 2098.82659   |             |             |             |
| LOC100499484 | LOC100499484 | 78.12586415 | 42.25613719 |             |
| 105.9307129  | 109.8451299  |             |             |             |
| RMRP         | RMRP         | 10.41678189 | 113.5633687 | 32.33674395 |
| 33.34584301  |              |             |             |             |
| GNAS-AS1     | GNAS-AS1     | 13.54181645 | 12.32470668 |             |
| 3.345180409  | 8.826840798  |             |             |             |
| LINC01023    | LINC01023    | 2.083356377 | 0           | 0           |
| 0.980760089  |              |             |             |             |

|              |              |             |             |             |             |
|--------------|--------------|-------------|-------------|-------------|-------------|
| NCF1C        | NCF1C        | 12.50013826 | 30.8117667  | 8.92048109  |             |
| 8.826840798  |              |             |             |             |             |
| NCF1B        | NCF1B        | 42.70880574 | 79.23025723 | 75.82408927 |             |
| 53.94180488  |              |             |             |             |             |
| PIAS4        | PIAS4        | 775.0085724 | 587.1842397 | 440.4487538 |             |
| 469.7840825  |              |             |             |             |             |
| LINC01012    | LINC01012    |             | 28.12531109 | 18.48706002 |             |
| 30.10662368  | 41.19192372  |             |             |             |             |
| PMS2P9       | PMS2P9       | 22.91692015 | 28.17075813 | 24.531323   |             |
| 14.71140133  |              |             |             |             |             |
| GGA2         | GGA2         | 8025.088766 | 7903.658327 | 6639.068051 |             |
| 8376.671917  |              |             |             |             |             |
| ZHX2         | ZHX2         | 604.1733494 | 937.5580439 | 1450.693237 |             |
| 1287.737996  |              |             |             |             |             |
| DCBLD1       | DCBLD1       | 619.7985223 | 440.1680957 | 477.2457383 |             |
| 411.9192372  |              |             |             |             |             |
| KDM4A-AS1    | KDM4A-AS1    |             | 468.7551849 | 337.1687613 |             |
| 303.2963571  | 336.4007104  |             |             |             |             |
| GCSHP3       | GCSHP3       | 33.33370204 | 52.82017149 | 31.22168382 |             |
| 39.23040355  |              |             |             |             |             |
| SPATA31E1    | SPATA31E1    |             | 0           | 0.880336191 | 0           |
| 0.980760089  |              |             |             |             |             |
| WDR49        | WDR49        | 0           | 0           | 17.84096218 | 0           |
| LOC440028    | LOC440028    |             | 9.375103698 | 1.760672383 |             |
| 24.531323    | 2.942280266  |             |             |             |             |
| ZNF205-AS1   | ZNF205-AS1   |             | 33.33370204 | 10.5640343  |             |
| 30.10662368  | 11.76912106  |             |             |             |             |
| LOC100240734 | LOC100240734 |             | 0           | 3.521344766 | 0           |
| 0.980760089  |              |             |             |             |             |
| FLJ12825     | FLJ12825     |             | 4.166712755 | 5.282017149 | 0           |
| 4.903800443  |              |             |             |             |             |
| GPRC5B       | GPRC5B       | 1.041678189 | 0           | 50.17770613 | 1.961520177 |
| NLK          | NLK          | 105.2094971 | 263.2205212 | 74.70902913 |             |
| 160.8446545  |              |             |             |             |             |
| POLR3K       | POLR3K       | 7393.831783 | 4724.764339 | 5120.356146 |             |
| 4763.551751  |              |             |             |             |             |
| DNAJB11      | DNAJB11      | 9482.396552 | 6146.507289 | 5429.227803 |             |
| 5361.815405  |              |             |             |             |             |
| SLC16A1-AS1  | SLC16A1-AS1  |             | 181.2520048 | 190.1526174 |             |
| 197.3656441  | 175.5560559  |             |             |             |             |
| TPRG1-AS2    | TPRG1-AS2    |             | 3.125034566 | 9.683698106 |             |
| 17.84096218  | 6.865320621  |             |             |             |             |
| LINC00853    | LINC00853    |             | 5.208390943 | 1.760672383 | 0           |
| 0            |              |             |             |             |             |
| EVL          | EVL          | 1547.933788 | 3534.549809 | 1646.943821 |             |
| 1341.679801  |              |             |             |             |             |
| GJB2         | GJB2         | 460.4217594 | 1403.255889 | 876.4372671 |             |
| 930.7413241  |              |             |             |             |             |
| TNKS         | TNKS         | 1338.556472 | 1936.739621 | 1836.504044 |             |
| 1835.982886  |              |             |             |             |             |

|              |              |             |             |             |             |
|--------------|--------------|-------------|-------------|-------------|-------------|
| MIR16-2      | MIR16-2      | 5.208390943 | 14.08537906 | 1.115060136 |             |
| 13.73064124  |              |             |             |             |             |
| MIR106A      | MIR106A      | 1.041678189 | 0           | 0           | 0           |
| LOC102724323 | LOC102724323 |             | 0           | 0.880336191 | 0           |
| HUWE1        | HUWE1        | 3894.834748 | 9468.015739 | 5270.889264 |             |
| 5463.814454  |              |             |             |             |             |
| ADAM23       | ADAM23       | 3.125034566 | 11.44437049 | 41.25722504 |             |
| 93.17220842  |              |             |             |             |             |
| SNORA70G     | SNORA70G     |             | 17.70852921 | 19.36739621 |             |
| 22.30120273  | 22.55748204  |             |             |             |             |
| LOC100289511 | LOC100289511 |             | 1860.437245 | 2097.841144 |             |
| 2435.291338  | 2815.762215  |             |             |             |             |
| LOC100294362 | LOC100294362 |             | 292.711571  | 803.7469428 |             |
| 275.4198537  | 272.6513047  |             |             |             |             |
| BCDIN3D-AS1  | BCDIN3D-AS1  |             | 371.8791134 | 370.6215366 |             |
| 505.1222417  | 461.9380018  |             |             |             |             |
| FAM133CP     | FAM133CP     |             | 0           | 0           | 1.115060136 |
| MST1P2       | MST1P2       | 9.375103698 | 14.96571525 | 33.45180409 | 0           |
| 34.3266031   |              |             |             |             |             |
| SNORD125     | SNORD125     |             | 2.083356377 | 6.16235334  |             |
| 2.230120273  | 1.961520177  |             |             |             |             |
| SCARNA27     | SCARNA27     |             | 1.041678189 | 1.760672383 |             |
| 24.531323    | 0.980760089  |             |             |             |             |
| SNORD127     | SNORD127     |             | 0           | 1.760672383 | 0           |
| SNORD58C     | SNORD58C     |             | 17.70852921 | 28.17075813 | 0           |
| 34.56686422  | 28.44204257  |             |             |             |             |
| SNORD105B    | SNORD105B    |             | 4.166712755 | 0.880336191 | 0           |
| 0            |              |             |             |             |             |
| SNORD19B     | SNORD19B     |             | 94.79271517 | 53.70050768 |             |
| 92.54999131  | 119.6527308  |             |             |             |             |
| SNORA70B     | SNORA70B     |             | 11.45846008 | 5.282017149 |             |
| 5.575300681  | 0            |             |             |             |             |
| SNHG15       | SNHG15       | 2578.153517 | 1961.389035 | 3501.288828 |             |
| 3058.990717  |              |             |             |             |             |
| SNORA38B     | SNORA38B     |             | 0           | 1.760672383 | 3.345180409 |
| 0            |              |             |             |             |             |
| SNORD12B     | SNORD12B     |             | 4.166712755 | 1.760672383 |             |
| 4.460240545  | 2.942280266  |             |             |             |             |
| SNORA36C     | SNORA36C     |             | 3.125034566 | 0           | 0           |
| SNORA84      | SNORA84      | 91.66768061 | 57.22185244 | 190.6752833 | 0           |
| 83.36460754  |              |             |             |             |             |
| SNHG9        | SNHG9        | 244.7943743 | 262.340185  | 295.4909361 |             |
| 193.2097375  |              |             |             |             |             |
| LRR37A4P     | LRR37A4P     |             | 153.1266937 | 315.1603565 |             |
| 223.0120273  | 275.5935849  |             |             |             |             |
| SNX29P2      | SNX29P2      | 25.00027653 | 17.60672383 | 35.68192436 |             |
| 43.1534439   |              |             |             |             |             |
| TPTEP1       | TPTEP1       | 1.041678189 | 2.641008574 | 10.03554123 |             |
| 10.78836098  |              |             |             |             |             |
| SCARNA16     | SCARNA16     |             | 77.08418596 | 43.13647338 |             |



|                        |                        |             |             |             |
|------------------------|------------------------|-------------|-------------|-------------|
| 83.62951022            | 74.53776674            |             |             |             |
| SNORA67 SNORA67        | 96.87607155            | 74.82857627 | 170.6042008 |             |
| 140.2486927            |                        |             |             |             |
| RPL13P5 RPL13P5        | 118.7513135            | 160.2211868 | 139.382517  |             |
| 104.9413295            |                        |             |             |             |
| PWARSN PWARSN          | 78.12586415            | 73.94824008 | 406.9969497 |             |
| 269.7090244            |                        |             |             |             |
| GLIS3-AS1              | GLIS3-AS1              | 0           | 5.282017149 | 3.345180409 |
| 0.980760089            |                        |             |             |             |
| ZNF847P ZNF847P        | 0                      | 0.880336191 | 0           | 0           |
| LOC100130987           | LOC100130987           | 14.58349464 | 36.09378385 |             |
| 16.72590204            | 30.40356275            |             |             |             |
| DCTN1-AS1              | DCTN1-AS1              | 2.083356377 | 4.401680957 |             |
| 11.15060136            | 2.942280266            |             |             |             |
| USP27X-AS1             | USP27X-AS1             | 18.7502074  | 11.44437049 |             |
| 89.2048109             | 24.51900222            |             |             |             |
| LINC00921              | LINC00921              | 14.58349464 | 30.8117667  |             |
| 57.98312709            | 38.24964346            |             |             |             |
| PDCD6IPP2              | PDCD6IPP2              | 21.87524196 | 12.32470668 |             |
| 49.062646              | 13.73064124            |             |             |             |
| LOC100130298           | LOC100130298           | 57.29230038 | 44.01680957 |             |
| 197.3656441            | 88.26840798            |             |             |             |
| RCAN3AS RCAN3AS        | 32.29202385            | 27.29042193 | 43.48734531 |             |
| 54.92256497            |                        |             |             |             |
| TFAP2A-AS1             | TFAP2A-AS1             | 3.125034566 | 7.042689532 | 0           |
| 2.942280266            |                        |             |             |             |
| RBM5-AS1               | RBM5-AS1               | 716.6745938 | 610.9533169 |             |
| 810.6487191            | 726.7432257            |             |             |             |
| MIR192 MIR192          | 0                      | 0           | 0.980760089 |             |
| LOC100507412           | LOC100507412           | 84.37593328 | 233.2890907 |             |
| 212.976486             | 184.3828967            |             |             |             |
| MIR363 MIR363          | 1.041678189            | 0           | 0           | 0           |
| MIR130B MIR130B        | 0                      | 3.521344766 | 5.575300681 | 0.980760089 |
| MIR150 MIR150          | 5.208390943            | 4.401680957 | 3.345180409 | 0           |
| LINC01260              | LINC01260              | 286.4615019 | 114.4437049 |             |
| 342.3234618            | 82.38384745            |             |             |             |
| LOC254896              | LOC254896              | 0           | 2.641008574 | 17.84096218 |
| 3.923040355            |                        |             |             |             |
| MIRLET7DHG             | MIRLET7DHG             | 6.250069132 | 41.375801   |             |
| 36.7969845             | 17.6536816             |             |             |             |
| LOC101243545           | LOC101243545           | 172.9185793 | 118.8453858 |             |
| 162.7987799            | 153.9793339            |             |             |             |
| CXorf31 CXorf31        | 0                      | 4.401680957 | 1.115060136 | 0           |
| USP45 USP45            | 1301.056058            | 833.6783733 | 963.4119577 |             |
| 876.7995193            |                        |             |             |             |
| LOC100505978           | LOC100505978           | 12.50013826 | 6.16235334  |             |
| 11.15060136            | 2.942280266            |             |             |             |
| SMYD1 SMYD1            | 0                      | 0.880336191 | 0           | 17.6536816  |
| DTX2P1-UPK3BP1-PMS2P11 | DTX2P1-UPK3BP1-PMS2P11 | 85.41761147 |             |             |
| 110.9223601            | 62.44336763            | 87.28764789 |             |             |

|                 |               |             |             |             |   |
|-----------------|---------------|-------------|-------------|-------------|---|
| ISM1-AS1        | ISM1-AS1      | 0           | 0.880336191 | 0           | 0 |
| ARAP2 ARAP2     | 3306.286571   | 4040.743119 | 6057.00666  |             |   |
| 5163.701867     |               |             |             |             |   |
| MIR3130-2       | MIR3130-2     | 2.083356377 | 0           | 0           | 0 |
| MIR3130-1       | MIR3130-1     | 2.083356377 | 0           | 0           | 0 |
| MIR3128 MIR3128 | 0 0.880336191 | 3.345180409 | 0.980760089 |             |   |
| LINC00612       | LINC00612     | 0           | 0.880336191 | 5.575300681 |   |
| 18.63444168     |               |             |             |             |   |
| LOC100133286    | LOC100133286  | 2265.65006  | 1278.24815  |             |   |
| 2107.463658     | 1695.734193   |             |             |             |   |
| PTOV1-AS1       | PTOV1-AS1     | 172.9185793 | 290.5109432 |             |   |
| 210.7463658     | 159.8638945   |             |             |             |   |
| CYP46A1 CYP46A1 | 0 1.760672383 | 12.2656615  | 3.923040355 |             |   |
| RPL23AP53       | RPL23AP53     | 288.5448583 | 375.9035537 |             |   |
| 560.8752485     | 523.7258873   |             |             |             |   |
| MIR4295 MIR4295 | 2.083356377   | 0           | 0           | 0           |   |
| CXCL16 CXCL16   | 243.7526962   | 256.1778317 | 318.907199  |             |   |
| 343.266031      |               |             |             |             |   |
| SKP1P2 SKP1P2   | 0 0           | 2.230120273 | 2.942280266 |             |   |
| MIR3651 MIR3651 | 83.3342551    | 52.82017149 | 177.2945617 |             |   |
| 76.49928692     |               |             |             |             |   |
| MIR3650 MIR3650 | 0 0           | 0           | 0.980760089 |             |   |
| LOC101928008    | LOC101928008  | 0           | 0           | 1.115060136 |   |
| 4.903800443     |               |             |             |             |   |
| TENM3 TENM3     | 7.291747321   | 0           | 0           | 0           |   |
| LINC00226       | LINC00226     | 0           | 0           | 1.115060136 | 0 |
| DLG1-AS1        | DLG1-AS1      | 25.00027653 | 36.97412004 |             |   |
| 15.61084191     | 21.57672195   |             |             |             |   |
| TCEB3-AS1       | TCEB3-AS1     | 467.7135067 | 384.7069157 |             |   |
| 548.609587      | 570.8023716   |             |             |             |   |
| LOC100506895    | LOC100506895  | 1.041678189 | 4.401680957 | 0           |   |
| 0               |               |             |             |             |   |
| LOC100128176    | LOC100128176  | 6.250069132 | 0           | 34.56686422 |   |
| 27.46128248     |               |             |             |             |   |
| FAM24B-CUZD1    | FAM24B-CUZD1  | 134.3764863 | 154.9391697 |             |   |
| 152.7632387     | 217.7287397   |             |             |             |   |
| LOC100233156    | LOC100233156  | 200.0022122 | 160.2211868 |             |   |
| 168.3740806     | 182.4213765   |             |             |             |   |
| SLFNL1-AS1      | SLFNL1-AS1    | 83.3342551  | 129.4094201 |             |   |
| 47.94758586     | 110.82589     |             |             |             |   |
| LINC00487       | LINC00487     | 0           | 1.760672383 | 2.230120273 |   |
| 12.74988115     |               |             |             |             |   |
| ZFP91-CNTF      | ZFP91-CNTF    | 1509.391695 | 1502.733879 |             |   |
| 1331.381803     | 1103.3551     |             |             |             |   |
| LOC100506178    | LOC100506178  | 2.083356377 | 0.880336191 |             |   |
| 32.33674395     | 0             |             |             |             |   |
| MED4-AS1        | MED4-AS1      | 2464.610594 | 1974.594077 |             |   |
| 2526.726269     | 2354.804973   |             |             |             |   |
| HOXA10-HOXA9    | HOXA10-HOXA9  | 0           | 2.641008574 | 8.92048109  |   |
| 0.980760089     |               |             |             |             |   |

|              |              |             |             |             |             |
|--------------|--------------|-------------|-------------|-------------|-------------|
| HMGA1P7      | HMGA1P7      | 0           | 0           | 1.115060136 | 0           |
| SRGAP2B      | SRGAP2B      | 623.965235  |             | 687.5425655 | 530.7686249 |
| 424.6691184  |              |             |             |             |             |
| BACE1-AS     | BACE1-AS     |             |             | 0           | 7.042689532 |
|              |              | 10.78836098 |             |             | 5.575300681 |
| UBOX5-AS1    | UBOX5-AS1    |             |             | 190.6271085 | 179.5885831 |
| 205.1710651  |              | 166.7292151 |             |             |             |
| MKNK1-AS1    | MKNK1-AS1    |             |             | 666.6740408 | 367.980528  |
| 379.1204463  |              | 341.3045109 |             |             |             |
| POU5F2       | POU5F2       | 0           | 0           | 6.690360818 | 0           |
| LSMEM2       | LSMEM2       | 1955.22996  |             | 1132.992678 | 1786.326338 |
| 1993.88526   |              |             |             |             |             |
| EPC2         | EPC2         | 163.5434756 |             | 166.3835402 | 344.5535821 |
| 207.9211388  |              |             |             |             |             |
| RPS16P5      | RPS16P5      | 35.41705842 |             | 46.65781815 | 27.87650341 |
| 34.3266031   |              |             |             |             |             |
| LOC100996325 | LOC100996325 |             |             | 0           | 0           |
|              |              |             |             | 0           | 0.980760089 |
| MIR4263      | MIR4263      | 55.208944   |             | 12.32470668 | 25.64638313 |
| 25.49976231  |              |             |             |             |             |
| MIR4269      | MIR4269      | 0           | 1.760672383 | 1.115060136 | 0           |
| MIR4326      | MIR4326      | 0           | 0           | 0           | 0.980760089 |
| MIR4260      | MIR4260      | 5.208390943 |             | 7.042689532 | 2.230120273 |
| 4.903800443  |              |             |             |             |             |
| MIR4256      | MIR4256      | 0           | 0           | 5.575300681 | 0           |
| MIR4324      | MIR4324      | 3.125034566 |             | 4.401680957 | 3.345180409 |
| 2.942280266  |              |             |             |             |             |
| MIR4315-1    | MIR4315-1    |             |             | 214.5857069 | 189.2722812 |
| 276.5349138  |              | 190.2674572 |             |             |             |
| AKR7L        | AKR7L        | 4.166712755 |             | 1.760672383 | 5.575300681 |
| 14.71140133  |              |             |             |             |             |
| LOC100652770 | LOC100652770 |             |             | 8.33342551  | 15.84605145 |
|              |              | 9.807600887 |             |             | 0           |
| LINC00856    | LINC00856    |             |             | 0           | 0           |
|              |              |             |             | 0           | 0.980760089 |
| LOC100287944 | LOC100287944 |             |             | 47.91719668 | 40.49546481 |
| 63.55842777  |              | 57.86484523 |             |             |             |
| MORF4L2-AS1  | MORF4L2-AS1  |             |             | 75.00082959 | 51.93983529 |
| 107.0457731  |              | 89.24916807 |             |             |             |
| LINC01239    | LINC01239    |             |             | 0           | 0           |
|              |              |             |             | 12.2656615  |             |
| 5.884560532  |              |             |             |             |             |
| LOC339874    | LOC339874    |             |             | 0           | 7.042689532 |
| 19.61520177  |              |             |             |             | 0           |
| FLJ46066     | FLJ46066     |             |             | 0           | 0           |
|              |              |             |             | 0           | 0.980760089 |
| LINC00894    | LINC00894    |             |             | 22.91692015 | 12.32470668 |
| 44.60240545  |              | 27.46128248 |             |             |             |
| MIR4515      | MIR4515      | 4.166712755 |             | 6.16235334  | 5.575300681 |
| 7.846080709  |              |             |             |             |             |
| MIR4513      | MIR4513      | 4.166712755 |             | 12.32470668 | 8.92048109  |
| 6.865320621  |              |             |             |             |             |
| MIR4510      | MIR4510      | 0           | 0           | 2.230120273 | 0           |
| IL10RB-AS1   | IL10RB-AS1   |             |             | 72.91747321 | 48.41849053 |

|                 |              |             |             |             |             |
|-----------------|--------------|-------------|-------------|-------------|-------------|
| 72.47890886     | 43.1534439   |             |             |             |             |
| MIRLET7D        | MIRLET7D     | 1.041678189 |             | 9.683698106 |             |
| 3.345180409     | 3.923040355  |             |             |             |             |
| SLC47A1 SLC47A1 | 78.12586415  | 152.2981611 |             | 32.33674395 |             |
| 23.53824213     |              |             |             |             |             |
| MIR4724 MIR4724 | 6.250069132  | 14.96571525 |             | 34.56686422 |             |
| 24.51900222     |              |             |             |             |             |
| CECR5-AS1       | CECR5-AS1    | 1.041678189 |             | 1.760672383 |             |
| 20.07108245     | 18.63444168  |             |             |             |             |
| ACN9 ACN9       | 1431.265831  | 1130.35167  |             | 1377.099268 |             |
| 1217.12327      |              |             |             |             |             |
| CBWD2 CBWD2     | 2260.441669  | 1162.043773 |             | 1777.405857 |             |
| 1315.199279     |              |             |             |             |             |
| HSCB HSCB       | 643.7571206  | 598.6286102 |             | 606.5927141 |             |
| 462.9187619     |              |             |             |             |             |
| LOC100506674    | LOC100506674 | 26.04195472 |             | 27.29042193 |             |
| 12.2656615      | 35.30736319  |             |             |             |             |
| HIST1H2AL       | HIST1H2AL    | 90.62600242 |             | 192.7936259 |             |
| 70.24878858     | 69.6339663   |             |             |             |             |
| MIR378D2        | MIR378D2     | 0           | 0           | 1.115060136 |             |
| 0.980760089     |              |             |             |             |             |
| MIR550A3        | MIR550A3     | 0           | 0.880336191 | 0           | 0           |
| MIR497 MIR497   | 1.041678189  | 0           | 0           | 0.980760089 |             |
| PKD1P1 PKD1P1   | 511.4639907  | 1438.469337 |             | 1118.405317 |             |
| 1237.719232     |              |             |             |             |             |
| PLEKHG7 PLEKHG7 | 1.041678189  | 0           | 1.115060136 | 0           |             |
| WASH2P WASH2P   | 123.9597045  | 202.477324  |             | 110.3909535 |             |
| 116.7104506     |              |             |             |             |             |
| LOC100130744    | LOC100130744 | 597.9232803 |             | 699.8672722 |             |
| 637.8143979     | 749.3007077  |             |             |             |             |
| CCDC163P        | CCDC163P     | 132.29313   |             | 353.0148128 |             |
| 275.4198537     | 279.5166253  |             |             |             |             |
| SNORD103B       | SNORD103B    | 4.166712755 |             | 5.282017149 |             |
| 11.15060136     | 5.884560532  |             |             |             |             |
| LOC644554       | LOC644554    | 0           | 0           | 0           | 0.980760089 |
| ST3GAL4-AS1     | ST3GAL4-AS1  | 263.5445817 |             | 243.853125  |             |
| 78.05420954     | 205.9596186  |             |             |             |             |
| MIRLET7A1       | MIRLET7A1    | 0           | 0.880336191 | 1.115060136 |             |
| 0.980760089     |              |             |             |             |             |
| MIR146B MIR146B | 0            | 0.880336191 | 2.230120273 | 0.980760089 |             |
| TUSC1 TUSC1     | 5.208390943  | 14.08537906 |             | 3.345180409 |             |
| 20.59596186     |              |             |             |             |             |
| LOC100506321    | LOC100506321 | 590.631533  |             | 845.1227438 |             |
| 1174.158323     | 833.6460754  |             |             |             |             |
| LINC00938       | LINC00938    | 500.0055306 |             | 456.8944834 |             |
| 557.5300681     | 448.2073605  |             |             |             |             |
| MIR4449 MIR4449 | 2.083356377  | 6.16235334  |             | 17.84096218 |             |
| 9.807600887     |              |             |             |             |             |
| LOC100132078    | LOC100132078 | 4.166712755 |             | 8.803361914 | 0           |
| 2.942280266     |              |             |             |             |             |

|              |              |             |             |             |             |
|--------------|--------------|-------------|-------------|-------------|-------------|
| MIR4442      | MIR4442      | 94.79271517 | 189.2722812 | 92.54999131 |             |
| 132.402612   |              |             |             |             |             |
| MIR4440      | MIR4440      | 0           | 0.880336191 | 0           | 0           |
| MIR4439      | MIR4439      | 0           | 2.641008574 | 0           | 3.923040355 |
| MIR548AE2    | MIR548AE2    | 0           | 0           | 2.230120273 | 0           |
| MIR4437      | MIR4437      | 5.208390943 | 0.880336191 | 0           | 0           |
| HOTAIRM1     | HOTAIRM1     |             | 39.58377117 | 64.26454197 |             |
| 44.60240545  | 34.3266031   |             |             |             |             |
| MIR4700      | MIR4700      | 46.87551849 | 113.5633687 | 69.13372845 |             |
| 66.69168603  |              |             |             |             |             |
| MIR4697      | MIR4697      | 0           | 3.521344766 | 1.115060136 | 0           |
| MIR4426      | MIR4426      | 15353.29482 | 14286.97605 | 19393.12589 |             |
| 16312.00179  |              |             |             |             |             |
| TXLNGY       | TXLNGY       | 0           | 468.3388538 | 0           | 690.4551024 |
| MIR197       | MIR197       | 6.250069132 | 3.521344766 | 4.460240545 | 0           |
| VTRNA2-1     | VTRNA2-1     |             | 5.208390943 | 3.521344766 |             |
| 7.805420954  | 5.884560532  |             |             |             |             |
| ZNF826P      | ZNF826P      | 135.4181645 | 54.58084387 | 163.91384   |             |
| 62.76864567  |              |             |             |             |             |
| LOC646471    | LOC646471    |             | 433.3381265 | 305.4766584 |             |
| 443.7939342  | 443.3035601  |             |             |             |             |
| LINC00441    | LINC00441    |             | 15.62517283 | 14.96571525 |             |
| 41.25722504  | 9.807600887  |             |             |             |             |
| RBM26-AS1    | RBM26-AS1    |             | 142.7099119 | 161.9818592 |             |
| 279.8800942  | 319.7277889  |             |             |             |             |
| STAG3L3      | STAG3L3      | 341.6704459 | 398.7922947 | 425.9529721 |             |
| 435.4574794  |              |             |             |             |             |
| STAG3L2      | STAG3L2      | 958.3439336 | 636.4830664 | 981.2529199 |             |
| 685.551302   |              |             |             |             |             |
| STAG3L1      | STAG3L1      | 518.755738  | 566.0561711 | 654.5403    |             |
| 588.4560532  |              |             |             |             |             |
| LOC100287015 | LOC100287015 |             | 262.5029036 | 257.0581679 |             |
| 231.9325083  | 217.7287397  |             |             |             |             |
| LDLRAD4-AS1  | LDLRAD4-AS1  |             | 4.166712755 | 2.641008574 |             |
| 1.115060136  | 8.826840798  |             |             |             |             |
| HIST1H2AE    | HIST1H2AE    |             | 43.75048393 | 120.6060582 |             |
| 31.22168382  | 36.28812328  |             |             |             |             |
| TPH2         | TPH2         | 0           | 0.880336191 | 0           | 0           |
| TTC3P1       | TTC3P1       | 0           | 0.880336191 | 10.03554123 | 3.923040355 |
| TLR8-AS1     | TLR8-AS1     |             | 3.125034566 | 0           | 0           |
| FAM212A      | FAM212A      | 27.08363291 | 44.89714576 | 78.05420954 |             |
| 47.07648426  |              |             |             |             |             |
| TAF4B        | TAF4B        | 1541.683719 | 939.3187163 | 2571.328674 |             |
| 2622.552477  |              |             |             |             |             |
| LOXL1        | LOXL1        | 60.41733494 | 78.34992104 | 97.01023186 |             |
| 197.1327778  |              |             |             |             |             |
| MTFMT        | MTFMT        | 1739.602575 | 1275.607141 | 1204.264947 |             |
| 1344.622082  |              |             |             |             |             |
| LINC00266-1  | LINC00266-1  | 0           | 0.880336191 | 8.92048109  |             |
| 4.903800443  |              |             |             |             |             |

|                 |              |             |             |             |   |
|-----------------|--------------|-------------|-------------|-------------|---|
| MAGI1-AS1       | MAGI1-AS1    | 1.041678189 | 0           | 0           | 0 |
| CSNK1G2-AS1     | CSNK1G2-AS1  | 3.125034566 | 10.5640343  |             |   |
| 3.345180409     | 1.961520177  |             |             |             |   |
| A2MP1 A2MP1     | 0 0          | 0           | 1.961520177 |             |   |
| MIR3155B        | MIR3155B     | 3.125034566 | 0.880336191 |             |   |
| 7.805420954     | 2.942280266  |             |             |             |   |
| PCAT19 PCAT19   | 29.16698928  | 0.880336191 | 0           | 0           |   |
| ADPGK-AS1       | ADPGK-AS1    | 738.5498358 | 636.4830664 |             |   |
| 762.7011332     | 685.551302   |             |             |             |   |
| LOC100506834    | LOC100506834 | 0           | 0           | 3.345180409 |   |
| 2.942280266     |              |             |             |             |   |
| MIR646HG        | MIR646HG     | 11.45846008 | 18.48706002 |             |   |
| 39.02710477     | 25.49976231  |             |             |             |   |
| FAM87A FAM87A   | 0 0          | 1.115060136 | 0           |             |   |
| PAPPA-AS1       | PAPPA-AS1    | 1.041678189 | 0.880336191 |             |   |
| 4.460240545     | 4.903800443  |             |             |             |   |
| GSN-AS1 GSN-AS1 | 22.91692015  | 34.33311147 | 31.22168382 |             |   |
| 32.36508293     |              |             |             |             |   |
| TMEM75 TMEM75   | 5.208390943  | 2.641008574 | 0           | 4.903800443 |   |
| ACER1 ACER1     | 3.125034566  | 0.880336191 | 53.52288654 |             |   |
| 24.51900222     |              |             |             |             |   |
| PCAT1 PCAT1     | 0 0          | 0           | 0.980760089 |             |   |
| RNF157-AS1      | RNF157-AS1   | 630.2153042 | 638.2437388 |             |   |
| 524.078264      | 366.8042732  |             |             |             |   |
| LOC100506082    | LOC100506082 | 1.041678189 | 1.760672383 | 0           |   |
|                 | 1.961520177  |             |             |             |   |
| PMS2P3 PMS2P3   | 341.6704459  | 288.7502708 | 414.8023707 |             |   |
| 407.0154368     |              |             |             |             |   |
| ZSCAN16-AS1     | ZSCAN16-AS1  | 383.3375734 | 453.3731386 |             |   |
| 469.4403174     | 371.7080736  |             |             |             |   |
| LOC100505658    | LOC100505658 | 35.41705842 | 14.96571525 |             |   |
| 15.61084191     | 9.807600887  |             |             |             |   |
| GALNT13 GALNT13 | 11.45846008  | 0           | 7.805420954 | 0           |   |
| FMNL2 FMNL2     | 6.250069132  | 51.0594991  | 35.68192436 |             |   |
| 32.36508293     |              |             |             |             |   |
| SLC16A12        | SLC16A12     | 3.125034566 | 0.880336191 |             |   |
| 10.03554123     | 0            |             |             |             |   |
| SULT1B1 SULT1B1 | 78.12586415  | 124.127403  | 23.41626286 |             |   |
| 45.11496408     |              |             |             |             |   |
| TSPYL2 TSPYL2   | 1291.680954  | 1196.376884 | 5088.019402 |             |   |
| 3035.452474     |              |             |             |             |   |
| ASB12 ASB12     | 12.50013826  | 26.41008574 | 6.690360818 |             |   |
| 19.61520177     |              |             |             |             |   |
| MADCAM1 MADCAM1 | 2.083356377  | 1.760672383 | 0           | 0           |   |
| LPCAT4 LPCAT4   | 815.6340218  | 1231.590332 | 625.5487364 |             |   |
| 815.9923938     |              |             |             |             |   |
| SELM SELM       | 160.4184411  | 119.725722  | 1478.569741 |             |   |
| 587.4752931     |              |             |             |             |   |
| LIX1 LIX1       | 3.125034566  | 0           | 0           | 0           |   |
| FBX039 FBX039   | 16.66685102  | 3.521344766 | 4.460240545 |             |   |

|                 |                 |             |             |             |             |
|-----------------|-----------------|-------------|-------------|-------------|-------------|
| 16.67292151     |                 |             |             |             |             |
| TULP2           | TULP2           | 1.041678189 | 1.760672383 | 3.345180409 |             |
| 3.923040355     |                 |             |             |             |             |
| DAND5           | DAND5           | 1.041678189 | 0.880336191 | 6.690360818 |             |
| 2.942280266     |                 |             |             |             |             |
| SVEP1           | SVEP1           | 0           | 3.521344766 | 3.345180409 | 0           |
| SNORD35B        | SNORD35B        |             | 72.91747321 | 52.82017149 |             |
| 108.1608332     |                 | 89.24916807 |             |             |             |
| UBE2Q2L         | UBE2Q2L         | 4.166712755 | 4.401680957 | 0           | 2.942280266 |
| ATXN7L2         | ATXN7L2         | 739.591514  | 624.1583597 | 646.734879  |             |
| 669.8591406     |                 |             |             |             |             |
| RPL13AP5        | RPL13AP5        |             | 14943.9153  | 15996.58893 |             |
| 24746.5296      |                 | 20690.11483 |             |             |             |
| TMEM86B         | TMEM86B         | 69.79243864 | 220.0840479 | 128.2319157 |             |
| 117.6912106     |                 |             |             |             |             |
| TEKT2           | TEKT2           | 0           | 0.880336191 | 7.805420954 | 0           |
| MIR663AHG       | MIR663AHG       |             | 1.041678189 | 0           | 11.15060136 |
| 1.961520177     |                 |             |             |             |             |
| FLJ42102        | FLJ42102        |             | 0           | 0           | 5.575300681 |
| LOC100129027    | LOC100129027    |             | 1.041678189 | 12.32470668 | 0           |
| 7.846080709     |                 |             |             |             |             |
| ZNF212          | ZNF212          | 979.1774974 | 992.1388878 | 1102.794475 |             |
| 1127.874102     |                 |             |             |             |             |
| XRN2            | XRN2            | 12498.05491 | 11763.93253 | 9820.33462  |             |
| 11946.63864     |                 |             |             |             |             |
| LINC00297       | LINC00297       |             | 0           | 0.880336191 | 0           |
| 0.980760089     |                 |             |             |             |             |
| GNRHR2          | GNRHR2          | 1383.348635 | 947.241742  | 1751.759474 |             |
| 1486.832294     |                 |             |             |             |             |
| C14orf79        | C14orf79        |             | 29.16698928 | 34.33311147 |             |
| 107.0457731     |                 | 92.19144833 |             |             |             |
| LDLRAD3         | LDLRAD3         | 16.66685102 | 22.00840479 | 0           | 28.44204257 |
| SMIM14          | SMIM14          | 201.0438904 | 184.8706002 | 527.4234445 |             |
| 260.8821836     |                 |             |             |             |             |
| RNASEK-C17orf49 | RNASEK-C17orf49 |             | 19862.7197  | 22953.00552 |             |
| 15614.18709     |                 | 13531.54694 |             |             |             |
| LINC00943       | LINC00943       |             | 5.208390943 | 9.683698106 |             |
| 54.63794668     |                 | 67.67244612 |             |             |             |
| HEATR4          | HEATR4          | 371.8791134 | 292.2716156 | 547.4945269 |             |
| 385.4387148     |                 |             |             |             |             |
| EZR-AS1         | EZR-AS1         | 2604.195472 | 2056.465343 | 1564.429371 |             |
| 1663.36911      |                 |             |             |             |             |
| LINC01132       | LINC01132       |             | 561.4645437 | 320.4423737 |             |
| 162.7987799     |                 | 269.7090244 |             |             |             |
| ZFX-AS1         | ZFX-AS1         | 3.125034566 | 12.32470668 | 12.2656615  |             |
| 5.884560532     |                 |             |             |             |             |
| CYP3A7-CYP3AP1  | CYP3A7-CYP3AP1  |             | 8.33342551  | 23.76907717 |             |
| 5.575300681     |                 | 15.69216142 |             |             |             |
| BATF2           | BATF2           | 4.166712755 | 0           | 42.37228518 | 3.923040355 |
| IQCD            | IQCD            | 22.91692015 | 37.85445623 | 40.14216491 |             |

|              |              |             |             |             |             |
|--------------|--------------|-------------|-------------|-------------|-------------|
| 52.96104479  |              |             |             |             |             |
| PROX2        | PROX2        | 2.083356377 | 7.042689532 | 5.575300681 |             |
| 9.807600887  |              |             |             |             |             |
| STYK1        | STYK1        | 84.37593328 | 14.08537906 | 0           | 18.63444168 |
| TMEM240      | TMEM240      | 0           | 2.641008574 | 0           | 0.980760089 |
| EXOC3L2      | EXOC3L2      | 0           | 0           | 0.980760089 |             |
| TCERG1L      | TCERG1L      | 1.041678189 | 10.5640343  | 5.575300681 |             |
| 25.49976231  |              |             |             |             |             |
| N6AMT2       | N6AMT2       | 732.2997667 | 686.6622293 | 711.4083669 |             |
| 726.7432257  |              |             |             |             |             |
| MARS2        | MARS2        | 1383.348635 | 949.8827506 | 1397.170351 |             |
| 1383.852485  |              |             |             |             |             |
| EMC10        | EMC10        | 128.1264172 | 496.509612  | 302.1812969 |             |
| 219.6902599  |              |             |             |             |             |
| CASC5        | CASC5        | 3557.331014 | 4734.448038 | 1543.243229 |             |
| 2184.152717  |              |             |             |             |             |
| CHRNA        | CHRNA        | 1.041678189 | 0.880336191 | 0           | 0           |
| DPH6-AS1     | DPH6-AS1     |             | 8.33342551  | 7.042689532 |             |
| 6.690360818  |              | 5.884560532 |             |             |             |
| LOC100506499 | LOC100506499 |             | 85.41761147 | 176.0672383 |             |
| 132.6921562  |              | 371.7080736 |             |             |             |
| LOC283045    | LOC283045    |             | 0           | 0           | 0.980760089 |
| LOC102031319 | LOC102031319 |             | 9.375103698 | 4.401680957 |             |
| 1.115060136  |              | 1.961520177 |             |             |             |
| LOC100129973 | LOC100129973 |             | 26.04195472 | 75.70891246 |             |
| 93.66505145  |              | 82.38384745 |             |             |             |
| TSPEAR       | TSPEAR       | 0           | 0           | 4.460240545 | 0           |
| SPDYE1       | SPDYE1       | 58.33397857 | 51.0594991  | 42.37228518 |             |
| 61.78788559  |              |             |             |             |             |
| RBPM5-AS1    | RBPM5-AS1    |             | 3.125034566 | 0           | 0           |
| KIAA1656     | KIAA1656     |             | 100.0011061 | 95.07630868 | 0           |
| 102.5855325  |              | 101.9990492 |             |             |             |
| KLHL6        | KLHL6        | 2020.855686 | 3077.655325 | 2847.863588 |             |
| 3178.643447  |              |             |             |             |             |
| HOXA-AS3     | HOXA-AS3     |             | 0           | 5.282017149 | 0           |
| 0.980760089  |              |             |             |             |             |
| STARD4-AS1   | STARD4-AS1   |             | 236.4609488 | 431.3647338 |             |
| 183.9849225  |              | 291.2857463 |             |             |             |
| MIR5190      | MIR5190      | 0           | 0.880336191 | 0           | 0           |
| MIR5188      | MIR5188      | 3.125034566 | 2.641008574 | 0           | 3.923040355 |
| MIR5187      | MIR5187      | 63.54236951 | 66.90555055 | 75.82408927 |             |
| 48.05724434  |              |             |             |             |             |
| MIR5094      | MIR5094      | 1.041678189 | 4.401680957 | 1.115060136 | 0           |
| MIR5093      | MIR5093      | 0           | 0.880336191 | 0           | 0           |
| MIR5091      | MIR5091      | 0           | 2.641008574 | 5.575300681 | 5.884560532 |
| MIR5090      | MIR5090      | 182.293683  | 142.614463  | 123.7716751 |             |
| 146.1332532  |              |             |             |             |             |
| MIR5088      | MIR5088      | 75.00082959 | 45.77748195 | 79.16926967 |             |
| 55.90332505  |              |             |             |             |             |
| ELK2AP       | ELK2AP       | 0           | 0.880336191 | 0           | 0           |



|             |             |             |             |             |
|-------------|-------------|-------------|-------------|-------------|
| PFN1P2      | PFN1P2      | 15.62517283 | 32.57243908 | 14.49578177 |
| 6.865320621 |             |             |             |             |
| ANKRD20A12P | ANKRD20A12P | 0           | 0           | 0           |
| LINC00659   | LINC00659   | 5.208390943 | 0.880336191 | 0.980760089 |
| 3.345180409 | 0.980760089 |             |             |             |
| XKR3        | XKR3        | 0           | 0.880336191 | 2.230120273 |
| ZNF792      | ZNF792      | 850.009402  | 684.9015569 | 941.110755  |
| 673.7821809 |             |             |             |             |
| SWSAP1      | SWSAP1      | 494.7971396 | 359.1771661 | 385.8108071 |
| 408.976957  |             |             |             |             |
| UBE3D       | UBE3D       | 310.4201002 | 160.2211868 | 304.4114172 |
| 289.3242262 |             |             |             |             |
| KCTD21-AS1  | KCTD21-AS1  | 221.8969671 | 217.7287397 | 215.6273851 |
| 221.8969671 | 217.7287397 |             |             | 168.1442126 |
| ERICH1-AS1  | ERICH1-AS1  | 1.961520177 | 1.041678189 | 0           |
| 1.961520177 |             |             |             | 0           |
| ZNF818P     | ZNF818P     | 19.79188559 | 20.2477324  | 176.1795015 |
| 73.55700665 |             |             |             |             |
| FAM90A25P   | FAM90A25P   | 0           | 0           | 0           |
| CMC1        | CMC1        | 1573.975743 | 1453.435052 | 1.961520177 |
| 1513.312817 |             |             |             | 1557.73901  |
| TEX19       | TEX19       | 0           | 0.880336191 | 0           |
| GPR142      | GPR142      | 0           | 0           | 2.942280266 |
| DPP9        | DPP9        | 7013.619245 | 6180.8404   | 0.980760089 |
| 5273.546997 |             |             |             | 5492.786231 |
| SRRM2       | SRRM2       | 17857.48919 | 25549.11695 | 23870.09234 |
| 24301.27348 |             |             |             |             |
| ZNF22       | ZNF22       | 1958.354995 | 2255.421322 | 2370.61785  |
| 2495.053666 |             |             |             |             |
| TNFAIP1     | TNFAIP1     | 3008.366609 | 2558.256972 | 2543.452171 |
| 2680.417322 |             |             |             |             |
| TTC3        | TTC3        | 3019.825069 | 3426.268457 | 5573.070561 |
| 4538.95769  |             |             |             |             |
| OTUD7A      | OTUD7A      | 34.37538023 | 29.93143051 | 97.01023186 |
| 168.6907353 |             |             |             |             |
| PIGW        | PIGW        | 1910.437798 | 1172.607807 | 2265.802197 |
| 1899.732292 |             |             |             |             |
| EXOC3L1     | EXOC3L1     | 11.45846008 | 13.20504287 | 5.575300681 |
| 9.807600887 |             |             |             |             |
| FAM101B     | FAM101B     | 1647.934895 | 2986.100361 | 1205.380007 |
| 1543.71638  |             |             |             |             |
| NOD2        | NOD2        | 183.3353612 | 363.5788471 | 597.672233  |
| 779.7042705 |             |             |             |             |
| CR1L        | CR1L        | 4.166712755 | 3.521344766 | 0           |
| BST1        | BST1        | 33.33370204 | 48.41849053 | 7.846080709 |
| 25.49976231 |             |             |             | 39.02710477 |
| CS          | CS          | 19960.63745 | 16125.99835 | 13808.90473 |
| 15634.29657 |             |             |             |             |
| FAM195A     | FAM195A     | 966.6773591 | 920.8316562 | 997.978822  |
| 1229.873151 |             |             |             |             |

|              |              |             |             |             |             |
|--------------|--------------|-------------|-------------|-------------|-------------|
| PGBD4        | PGBD4        | 211.4606723 | 235.0497631 | 345.6686422 |             |
| 322.6700692  |              |             |             |             |             |
| MTPAP        | MTPAP        | 1612.517836 | 2067.029377 | 1566.659491 |             |
| 1345.602842  |              |             |             |             |             |
| DOK4         | DOK4         | 364.587366  | 410.2366652 | 792.8077569 |             |
| 778.7235104  |              |             |             |             |             |
| TMEM183A     | TMEM183A     |             | 4944.846362 | 3630.506453 |             |
| 3815.735786  | 4008.366482  |             |             |             |             |
| RPAP2        | RPAP2        | 2314.608935 | 1572.280438 | 2162.101604 |             |
| 2033.115664  |              |             |             |             |             |
| RHOT2        | RHOT2        | 7094.870143 | 5996.850136 | 5211.791077 |             |
| 7065.395679  |              |             |             |             |             |
| CYB5R1       | CYB5R1       | 1472.932959 | 833.6783733 | 2294.79376  |             |
| 1682.984312  |              |             |             |             |             |
| ZNF57        | ZNF57        | 414.5879191 | 288.7502708 | 772.7366744 |             |
| 475.668643   |              |             |             |             |             |
| ZNF283       | ZNF283       | 141.6682337 | 84.51227438 | 305.5264773 |             |
| 185.3636568  |              |             |             |             |             |
| DNTTIP1      | DNTTIP1      | 4388.590209 | 3263.406262 | 3211.373192 |             |
| 3080.567439  |              |             |             |             |             |
| LOC100132781 | LOC100132781 | 0           | 1.760672383 | 3.345180409 |             |
| 3.923040355  |              |             |             |             |             |
| LM07DN       | LM07DN       | 0           | 2.641008574 | 0           | 0           |
| PRDM5        | PRDM5        | 3.125034566 | 29.05109432 | 16.72590204 |             |
| 10.78836098  |              |             |             |             |             |
| LINC01505    | LINC01505    | 0           | 4.401680957 | 5.575300681 |             |
| 0            |              |             |             |             |             |
| PCAT6        | PCAT6        | 13.54181645 | 6.16235334  | 7.805420954 |             |
| 13.73064124  |              |             |             |             |             |
| STARD7-AS1   | STARD7-AS1   |             | 1802.103266 | 1731.621289 |             |
| 1480.799861  | 1718.291675  |             |             |             |             |
| NS3BP        | NS3BP        | 16.66685102 | 112.6830325 | 50.17770613 |             |
| 80.42232727  |              |             |             |             |             |
| KLHL25       | KLHL25       | 297.919962  | 440.1680957 | 473.9005579 |             |
| 513.9182865  |              |             |             |             |             |
| SNORA10      | SNORA10      | 126.0430608 | 117.0847135 | 152.7632387 |             |
| 140.2486927  |              |             |             |             |             |
| NDFIP1       | NDFIP1       | 4190.671353 | 6989.86936  | 6530.907218 |             |
| 6173.884758  |              |             |             |             |             |
| MCEMP1       | MCEMP1       | 0           | 5.282017149 | 0           | 0           |
| TNFAIP6      | TNFAIP6      | 9.375103698 | 14.08537906 | 15.61084191 |             |
| 2.942280266  |              |             |             |             |             |
| TCHH         | TCHH         | 11.45846008 | 10.5640343  | 0           | 5.884560532 |
| TEP1         | TEP1         | 389.5876426 | 1231.590332 | 345.6686422 |             |
| 589.4368133  |              |             |             |             |             |
| NLRP9        | NLRP9        | 3.125034566 | 0.880336191 | 8.92048109  | 0           |
| USP30-AS1    | USP30-AS1    |             | 419.79631   | 349.493468  |             |
| 824.0294407  | 578.6484523  |             |             |             |             |
| LINC00327    | LINC00327    | 0           | 3.521344766 | 0           | 0           |
| CTAGE7P      | CTAGE7P      | 2.083356377 | 5.282017149 | 10.03554123 |             |

|              |              |             |             |             |             |  |
|--------------|--------------|-------------|-------------|-------------|-------------|--|
| 15.69216142  |              |             |             |             |             |  |
| SNAP25-AS1   | SNAP25-AS1   | 0           | 0           | 5.575300681 | 0           |  |
| LOC285819    | LOC285819    | 56.25062219 |             | 130.2897563 |             |  |
| 69.13372845  | 86.3068878   |             |             |             |             |  |
| MIR5586      | MIR5586      | 2.083356377 | 2.641008574 | 1.115060136 | 0           |  |
| MIR5582      | MIR5582      | 1.041678189 | 0           | 0           |             |  |
| MIR5581      | MIR5581      | 10.41678189 | 17.60672383 | 20.07108245 |             |  |
| 34.3266031   |              |             |             |             |             |  |
| MIR664B      | MIR664B      | 1.041678189 | 1.760672383 | 6.690360818 |             |  |
| 0.980760089  |              |             |             |             |             |  |
| MIR4639      | MIR4639      | 0           | 0           | 8.92048109  | 2.942280266 |  |
| KDM7A        | KDM7A        | 1383.348635 | 2057.345679 | 1396.055291 |             |  |
| 1190.642748  |              |             |             |             |             |  |
| LOC101059948 | LOC101059948 | 0           | 0           | 6.690360818 |             |  |
| 4.903800443  |              |             |             |             |             |  |
| MIR4750      | MIR4750      | 6.250069132 | 7.042689532 | 18.95602232 |             |  |
| 9.807600887  |              |             |             |             |             |  |
| MINOS1P1     | MINOS1P1     |             | 25.00027653 | 42.25613719 |             |  |
| 28.99156354  | 32.36508293  |             |             |             |             |  |
| LYRM9        | LYRM9        | 48.95887487 | 99.47798963 | 214.0915462 |             |  |
| 147.1140133  |              |             |             |             |             |  |
| LOC644172    | LOC644172    | 0           | 0           | 4.460240545 | 0           |  |
| FSIP2        | FSIP2        | 0           | 0           | 3.345180409 | 0           |  |
| ERVFRD-1     | ERVFRD-1     | 1.041678189 |             | 15.84605145 | 0           |  |
| 0.980760089  |              |             |             |             |             |  |
| STARD5       | STARD5       | 177.0852921 | 168.1442126 | 386.9258673 |             |  |
| 333.4584301  |              |             |             |             |             |  |
| IPMK         | IPMK         | 565.6312565 | 667.2948331 | 603.2475337 |             |  |
| 698.3011831  |              |             |             |             |             |  |
| HOXB-AS1     | HOXB-AS1     |             | 10.41678189 | 51.0594991  |             |  |
| 15.61084191  | 31.38432284  |             |             |             |             |  |
| LOC100507283 | LOC100507283 |             | 14.58349464 | 14.96571525 |             |  |
| 54.63794668  | 31.38432284  |             |             |             |             |  |
| LOC101929505 | LOC101929505 | 0           | 2.641008574 | 7.805420954 |             |  |
| 0            |              |             |             |             |             |  |
| WBP2NL       | WBP2NL       | 9.375103698 | 6.16235334  | 0           | 17.6536816  |  |
| DTX3L        | DTX3L        | 6899.034644 | 5808.458191 | 16047.94548 |             |  |
| 8166.789258  |              |             |             |             |             |  |
| MPLKIP       | MPLKIP       | 1954.188282 | 1853.107683 | 1596.766115 |             |  |
| 1799.694763  |              |             |             |             |             |  |
| ZNF616       | ZNF616       | 414.5879191 | 422.5613719 | 1005.784243 |             |  |
| 757.1467885  |              |             |             |             |             |  |
| NALCN-AS1    | NALCN-AS1    | 0           | 0           | 0           | 2.942280266 |  |
| TRAM2-AS1    | TRAM2-AS1    | 7.291747321 |             | 13.20504287 |             |  |
| 71.36384872  | 32.36508293  |             |             |             |             |  |
| HAVCR2       | HAVCR2       | 9857.4007   | 14524.66682 | 2249.076295 |             |  |
| 6587.765516  |              |             |             |             |             |  |
| TRIM11       | TRIM11       | 2157.315529 | 2062.627697 | 2110.808838 |             |  |
| 1870.309489  |              |             |             |             |             |  |
| COX8C        | COX8C        | 0           | 0.880336191 | 15.61084191 | 0           |  |

|              |              |             |             |             |             |
|--------------|--------------|-------------|-------------|-------------|-------------|
| RIMS4        | RIMS4        | 0           | 0           | 3.345180409 | 1.961520177 |
| TMEM52       | TMEM52       | 13.54181645 |             | 10.5640343  | 34.56686422 |
| 54.92256497  |              |             |             |             |             |
| RPL27A       | RPL27A       | 12223.05187 |             | 12199.69894 | 18668.3368  |
| 14878.13055  |              |             |             |             |             |
| RPL26        | RPL26        | 8132.381619 |             | 9968.927032 | 10419.12191 |
| 9828.196849  |              |             |             |             |             |
| CPLX4        | CPLX4        | 0           | 0           | 5.575300681 | 0           |
| ENHO         | ENHO         | 0           | 1.760672383 | 6.690360818 | 3.923040355 |
| MED12L       | MED12L       | 33.33370204 |             | 175.1869021 | 27.87650341 |
| 46.09572417  |              |             |             |             |             |
| GAPT         | GAPT         | 4.166712755 |             | 0           | 0           |
| KIF7         | KIF7         | 78.12586415 |             | 183.990264  | 23.41626286 |
| 95.1337286   |              |             |             |             |             |
| MGAT5        | MGAT5        | 378.1291825 |             | 323.0833823 | 321.1373192 |
| 373.6695938  |              |             |             |             |             |
| CEP97        | CEP97        | 1142.720973 |             | 1044.078723 | 769.391494  |
| 1112.181941  |              |             |             |             |             |
| LAMTOR1      | LAMTOR1      | 3789.62525  |             | 4060.110515 | 3241.479816 |
| 3516.024918  |              |             |             |             |             |
| PAK1IP1      | PAK1IP1      | 2916.698928 |             | 2307.361158 | 3164.540667 |
| 2995.241311  |              |             |             |             |             |
| TTC23L       | TTC23L       | 9.375103698 |             | 3.521344766 | 6.690360818 |
| 7.846080709  |              |             |             |             |             |
| MIR6829      | MIR6829      | 0           | 0.880336191 | 1.115060136 | 0           |
| MIR6823      | MIR6823      | 0           | 0.880336191 | 0           | 0           |
| SMIM2-AS1    | SMIM2-AS1    |             | 1.041678189 | 0           | 1.115060136 |
| 3.923040355  |              |             |             |             |             |
| TPRG1        | TPRG1        | 460.4217594 |             | 1182.291505 | 502.8921215 |
| 637.4940576  |              |             |             |             |             |
| GZMH         | GZMH         | 257.2945126 |             | 241.2121165 | 739.2848703 |
| 897.3954811  |              |             |             |             |             |
| CCDC137      | CCDC137      | 3423.996206 |             | 2411.240828 | 2763.119018 |
| 2587.245114  |              |             |             |             |             |
| NKAIN4       | NKAIN4       | 0           | 1.760672383 | 0           | 0           |
| ZNF32-AS2    | ZNF32-AS2    |             | 113.5429226 |             | 97.71731725 |
| 316.6770787  | 314.8239885  |             |             |             |             |
| LINC-ROR     | LINC-ROR     |             | 0           | 9.683698106 | 0           |
| 7.846080709  |              |             |             |             |             |
| LOC100288866 | LOC100288866 |             | 1.041678189 |             | 0.880336191 |
| 4.460240545  | 0.980760089  |             |             |             |             |
| LOC100507506 | LOC100507506 |             | 2.083356377 |             | 4.401680957 |
| 42.37228518  | 2.942280266  |             |             |             |             |
| SIGLEC17P    | SIGLEC17P    |             | 101.0427843 |             | 43.13647338 |
| 2.230120273  | 34.3266031   |             |             |             |             |
| ALG14        | ALG14        | 714.5912374 |             | 544.9281025 | 546.3794668 |
| 479.5916834  |              |             |             |             |             |
| IMMP1L       | IMMP1L       | 887.5098168 |             | 892.6608981 | 685.7619838 |
| 671.8206607  |              |             |             |             |             |
| JAG1         | JAG1         | 14.58349464 |             | 14.96571525 | 144.9578177 |

|                 |               |             |             |             |   |  |
|-----------------|---------------|-------------|-------------|-------------|---|--|
| 25.49976231     |               |             |             |             |   |  |
| MISP MISP       | 4.166712755   | 1.760672383 | 2.230120273 |             |   |  |
| 2.942280266     |               |             |             |             |   |  |
| LOC388849       | LOC388849     | 0           | 0.880336191 | 0           | 0 |  |
| CXorf38 CXorf38 | 1940.646466   | 1548.511361 | 2410.760015 |             |   |  |
| 1424.063649     |               |             |             |             |   |  |
| CENPV CENPV     | 1252.097183   | 1248.316719 | 961.1818375 |             |   |  |
| 1478.986214     |               |             |             |             |   |  |
| VSX2 VSX2       | 0 0           | 16.72590204 | 0           |             |   |  |
| TMEM44-AS1      | TMEM44-AS1    | 215.6273851 | 176.0672383 |             |   |  |
| 253.1186509     | 174.5752958   |             |             |             |   |  |
| RMDN2-AS1       | RMDN2-AS1     | 1.041678189 | 0.880336191 | 0           |   |  |
| 0               |               |             |             |             |   |  |
| PGAM1P5 PGAM1P5 | 0 3.521344766 | 0           | 0.980760089 |             |   |  |
| LOC100996255    | LOC100996255  | 6.250069132 | 1.760672383 |             |   |  |
| 59.09818722     | 52.96104479   |             |             |             |   |  |
| FLJ31104        | FLJ31104      | 12.50013826 | 21.12806859 |             |   |  |
| 21.18614259     | 12.74988115   |             |             |             |   |  |
| SNORD124        | SNORD124      | 4.166712755 | 9.683698106 |             |   |  |
| 4.460240545     | 5.884560532   |             |             |             |   |  |
| SNORD121B       | SNORD121B     | 2.083356377 | 1.760672383 | 0           |   |  |
| 0.980760089     |               |             |             |             |   |  |
| LOC729930       | LOC729930     | 1.041678189 | 0           | 4.460240545 |   |  |
| 0.980760089     |               |             |             |             |   |  |
| SSTR2 SSTR2     | 25.00027653   | 50.17916291 | 11.15060136 |             |   |  |
| 15.69216142     |               |             |             |             |   |  |
| FLJ35934        | FLJ35934      | 0           | 0.880336191 | 6.690360818 |   |  |
| 1.961520177     |               |             |             |             |   |  |
| DCAF7 DCAF7     | 11280.33311   | 13463.86171 | 9840.405703 |             |   |  |
| 11560.21917     |               |             |             |             |   |  |
| MUC19 MUC19     | 0 0           | 0           | 4.903800443 |             |   |  |
| EN04 EN04       | 0 4.401680957 | 11.15060136 | 6.865320621 |             |   |  |
| LOC100289580    | LOC100289580  | 553.1311182 | 1291.453193 |             |   |  |
| 381.3505666     | 542.360329    |             |             |             |   |  |
| PRKXP1 PRKXP1   | 244.7943743   | 367.1001918 | 371.3150254 |             |   |  |
| 370.7273135     |               |             |             |             |   |  |
| ACSM6 ACSM6     | 0 0           | 3.345180409 | 0           |             |   |  |
| KLHL17 KLHL17   | 360.4206533   | 579.261214  | 263.1541922 |             |   |  |
| 570.8023716     |               |             |             |             |   |  |
| BCL6B BCL6B     | 114.5846008   | 235.0497631 | 73.59396899 |             |   |  |
| 29.42280266     |               |             |             |             |   |  |
| KIAA1147        | KIAA1147      | 1834.39529  | 1581.964136 |             |   |  |
| 2651.613004     | 2259.671244   |             |             |             |   |  |
| IL36A IL36A     | 0 0.880336191 | 0           | 0           |             |   |  |
| ZNF599 ZNF599   | 106.2511752   | 123.2470668 | 185.0999826 |             |   |  |
| 163.7869348     |               |             |             |             |   |  |
| DNASE1 DNASE1   | 906.2600242   | 823.114339  | 975.6776192 |             |   |  |
| 1048.432535     |               |             |             |             |   |  |
| F2R F2R         | 4266.713861   | 6797.95607  | 1145.16676  |             |   |  |
| 2603.918035     |               |             |             |             |   |  |

|                 |              |             |             |
|-----------------|--------------|-------------|-------------|
| SYS1-DBNDD2     | SYS1-DBNDD2  | 766.6751469 | 576.6202054 |
| 1381.559509     | 893.4724408  |             |             |
| USP32P1 USP32P1 | 11.45846008  | 96.83698106 | 16.72590204 |
| 64.73016585     |              |             |             |
| LINC00885       | LINC00885    | 0           | 6.16235334  |
| 3.923040355     |              |             | 0           |
| MIR2861 MIR2861 | 1.041678189  | 5.282017149 | 4.460240545 |
| 8.826840798     |              |             |             |
| GTF3C2-AS1      | GTF3C2-AS1   | 1989.60534  | 1462.238414 |
| 1525.402266     | 1783.021841  |             |             |
| AKR1CL1 AKR1CL1 | 5.208390943  | 0           | 0           |
| RBM12B-AS1      | RBM12B-AS1   | 40.62544936 | 79.23025723 |
| 113.7361339     | 77.480047    |             |             |
| PRORS1P         | PRORS1P      | 40.62544936 | 53.70050768 |
| 78.05420954     | 54.92256497  |             |             |
| FLJ26850        | FLJ26850     | 3.125034566 | 0.880336191 |
| 10.03554123     | 0.980760089  |             |             |
| LOC101926987    | LOC101926987 | 15.62517283 | 15.84605145 |
| 57.98312709     | 21.57672195  |             |             |
| SNORA8 SNORA8   | 38.54209298  | 25.52974955 | 12.2656615  |
| 39.23040355     |              |             |             |
| LOC285626       | LOC285626    | 3.125034566 | 4.401680957 |
| 4.460240545     | 1.961520177  |             |             |
| SDHAP2 SDHAP2   | 1669.810136  | 1654.151704 | 1262.248074 |
| 1555.485501     |              |             |             |
| SDHAP3 SDHAP3   | 46.87551849  | 87.15328295 | 165.0289002 |
| 169.6714953     |              |             |             |
| DNM1P46 DNM1P46 | 18.7502074   | 67.78588674 | 41.25722504 |
| 46.09572417     |              |             |             |
| DEFB109P1       | DEFB109P1    | 0           | 0.880336191 |
| CETN4P CETN4P   | 14.58349464  | 17.60672383 | 24.531323   |
| 13.73064124     |              |             |             |
| DANCR DANCR     | 1359.390036  | 1107.462929 | 1119.520377 |
| 1009.202131     |              |             |             |
| ADAT2 ADAT2     | 905.218346   | 983.3355258 | 652.3101797 |
| 985.6638891     |              |             |             |
| ZNF396 ZNF396   | 29.16698928  | 15.84605145 | 35.68192436 |
| 67.67244612     |              |             |             |
| PDIA4 PDIA4     | 18555.41358  | 15152.34653 | 13696.28365 |
| 14367.15454     |              |             |             |
| GSTA1 GSTA1     | 0            | 0           | 0.980760089 |
| DDX12P DDX12P   | 706.2578119  | 989.4978792 | 401.4216491 |
| 560.0140106     |              |             |             |
| FAM66D FAM66D   | 15.62517283  | 16.72638764 | 10.03554123 |
| 21.57672195     |              |             |             |
| FAM66E FAM66E   | 0            | 0           | 2.942280266 |
| FAM66B FAM66B   | 28.12531109  | 27.29042193 | 41.25722504 |
| 50.99952461     |              |             |             |
| PITHD1 PITHD1   | 3498.997036  | 2626.923195 | 4227.192977 |
| 3145.297604     |              |             |             |

|                 |              |               |             |
|-----------------|--------------|---------------|-------------|
| TMEM229B        | TMEM229B     | 275.0030418   | 77.46958485 |
| 1262.248074     | 689.4743423  |               |             |
| C20orf196       | C20orf196    | 820.8424127   | 690.1835741 |
| 734.8246298     | 774.80047    |               |             |
| BPTF BPTF       | 1403.14052   | 2624.282187   | 1805.282361 |
| 1487.813055     |              |               |             |
| UAP1L1 UAP1L1   | 986.4692447  | 924.353001    | 1277.858916 |
| 929.7605641     |              |               |             |
| WDR53 WDR53     | 1613.559514  | 1081.933179   | 1501.986004 |
| 1162.200705     |              |               |             |
| USP17L7 USP17L7 | 0 0          | 5.575300681   | 0           |
| TMED10 TMED10   | 15804.34148  | 14343.31757   | 17323.57428 |
| 14633.92128     |              |               |             |
| TMEM61 TMEM61   | 5.208390943  | 0.880336191   | 3.345180409 |
| 4.903800443     |              |               |             |
| NEFL NEFL       | 16.66685102  | 0 230.8174482 | 146.1332532 |
| UBALD2 UBALD2   | 283.3364673  | 1718.416246   | 226.3572077 |
| 253.0361029     |              |               |             |
| NRADDP NRADDP   | 1.041678189  | 6.16235334    | 11.15060136 |
| 5.884560532     |              |               |             |
| CROCCP3 CROCCP3 | 75.00082959  | 79.23025723   | 105.9307129 |
| 90.22992816     |              |               |             |
| RRN3P1 RRN3P1   | 87.50096785  | 491.2275948   | 157.2234792 |
| 425.6498785     |              |               |             |
| ANKRD18DP       | ANKRD18DP    | 6.250069132   | 4.401680957 |
| 35.68192436     | 15.69216142  |               |             |
| EP400NL EP400NL | 130.2097736  | 161.101523    | 78.05420954 |
| 141.2294528     |              |               |             |
| MIR155 MIR155   | 384.3792516  | 226.2464012   | 1640.25346  |
| 1183.777427     |              |               |             |
| LOC729603       | LOC729603    | 13.54181645   | 56.34151625 |
| 40.14216491     | 32.36508293  |               |             |
| HNRNPA3 HNRNPA3 | 5835.481213  | 7924.786395   | 5894.20788  |
| 6004.213263     |              |               |             |
| MIR3606 MIR3606 | 2.083356377  | 0 0           | 0           |
| SCARNA17        | SCARNA17     | 30.20866747   | 27.29042193 |
| 206.2861252     | 107.8836098  |               |             |
| RRN3P2 RRN3P2   | 523.9641289  | 386.467588    | 646.734879  |
| 499.2068851     |              |               |             |
| DPY19L2P1       | DPY19L2P1    | 0 0           | 2.230120273 |
| 0.980760089     |              |               |             |
| RECQL4 RECQL4   | 4259.422114  | 5377.973793   | 2127.53474  |
| 4174.114937     |              |               |             |
| PIN4P1 PIN4P1   | 94.79271517  | 138.2127821   | 62.44336763 |
| 48.05724434     |              |               |             |
| LOC344967       | LOC344967    | 91.66768061   | 114.4437049 |
| 79.16926967     | 68.65320621  |               |             |
| LOC100507377    | LOC100507377 | 0 1.760672383 | 0           |
| 1.961520177     |              |               |             |
| SCARNA12        | SCARNA12     | 160.4184411   | 93.31563629 |

|              |              |             |             |             |             |
|--------------|--------------|-------------|-------------|-------------|-------------|
| 152.7632387  | 152.9985738  |             |             |             |             |
| MIR223       | MIR223       | 1.041678189 | 0           | 0           | 0           |
| MIR941-1     | MIR941-1     |             | 0           | 0.880336191 | 0           |
| 0.980760089  |              |             |             |             |             |
| FLJ45079     | FLJ45079     |             | 0           | 3.521344766 | 0           |
| CRIPAK       | CRIPAK       | 94.79271517 | 24.64941336 | 68.01866831 | 0           |
| 50.99952461  |              |             |             |             |             |
| PDE12        | PDE12        | 5251.099749 | 4146.383462 | 4008.64119  |             |
| 3889.694512  |              |             |             |             |             |
| PIWIL4       | PIWIL4       | 16.66685102 | 7.042689532 | 75.82408927 |             |
| 52.96104479  |              |             |             |             |             |
| P4HTM        | P4HTM        | 1768.769564 | 1560.836067 | 1739.493813 |             |
| 2191.018038  |              |             |             |             |             |
| TMEM37       | TMEM37       | 0           | 0           | 5.884560532 |             |
| SLC25A16     | SLC25A16     |             | 625.0069132 | 732.4397113 |             |
| 453.8294755  | 432.5151991  |             |             |             |             |
| LINC00574    | LINC00574    |             | 4.166712755 | 5.282017149 |             |
| 2.230120273  | 9.807600887  |             |             |             |             |
| P2RY6        | P2RY6        | 0           | 0.880336191 | 0           | 0           |
| LOC101928580 | LOC101928580 |             | 0           | 0           | 5.575300681 |
| LOC389906    | LOC389906    |             | 715.6329156 | 368.8608642 | 0           |
| 948.916176   | 374.6503539  |             |             |             |             |
| LOC643201    | LOC643201    |             | 1.041678189 | 0.880336191 | 0           |
| 4.903800443  |              |             |             |             |             |
| LINC00884    | LINC00884    |             | 76.04250777 | 91.55496391 |             |
| 41.25722504  | 48.05724434  |             |             |             |             |
| TUSC5        | TUSC5        | 42.70880574 | 22.00840479 | 2.230120273 |             |
| 4.903800443  |              |             |             |             |             |
| NMUR1        | NMUR1        | 27.08363291 | 55.46118006 | 0           | 12.74988115 |
| CTR9         | CTR9         | 10302.19729 | 9116.761599 | 10423.58215 |             |
| 10888.3985   |              |             |             |             |             |
| POLH         | POLH         | 3988.585785 | 3431.550474 | 3539.200873 |             |
| 2549.976231  |              |             |             |             |             |
| SRMS         | SRMS         | 0           | 0.880336191 | 0           | 1.961520177 |
| FLJ40288     | FLJ40288     |             | 0           | 0           | 2.942280266 |
| C19orf70     | C19orf70     |             | 2017.730652 | 1641.826997 |             |
| 2187.747987  | 2003.692861  |             |             |             |             |
| C15orf52     | C15orf52     |             | 0           | 17.60672383 | 12.2656615  |
| 15.69216142  |              |             |             |             |             |
| GPR153       | GPR153       | 89.58432423 | 41.375801   | 42.37228518 |             |
| 45.11496408  |              |             |             |             |             |
| KIAA1211L    | KIAA1211L    |             | 23.95859834 | 14.08537906 |             |
| 57.98312709  | 34.3266031   |             |             |             |             |
| LINC00381    | LINC00381    |             | 0           | 0           | 1.115060136 |
| 1.961520177  |              |             |             |             |             |
| NLRP12       | NLRP12       | 0           | 0           | 2.230120273 | 0           |
| DNAH11       | DNAH11       | 1298.972701 | 1132.112342 | 848.5607637 |             |
| 771.8581898  |              |             |             |             |             |
| SNORD46      | SNORD46      | 28.12531109 | 26.41008574 | 42.37228518 |             |
| 52.96104479  |              |             |             |             |             |



|              |              |             |             |             |
|--------------|--------------|-------------|-------------|-------------|
| SNORD55      | SNORD55      | 85.41761147 | 44.01680957 | 89.2048109  |
| 77.480047    |              |             |             |             |
| SNORA68      | SNORA68      | 65.62572589 | 27.29042193 | 59.09818722 |
| 40.21116364  |              |             |             |             |
| MFSD8        | MFSD8        | 1450.016039 | 1015.027629 | 1314.655901 |
| 1401.506167  |              |             |             |             |
| CATSPERD     | CATSPERD     |             | 4.166712755 | 3.521344766 |
| 3.345180409  | 5.884560532  |             |             |             |
| TMEM110      | TMEM110      | 4426.090624 | 3391.055009 | 3390.897874 |
| 3143.336084  |              |             |             |             |
| LHFPL4       | LHFPL4       | 30.20866747 | 14.08537906 | 36.7969845  |
| 23.53824213  |              |             |             |             |
| STK32C       | STK32C       | 301.0449965 | 172.5458935 | 409.22707   |
| 520.7836071  |              |             |             |             |
| PGBD5        | PGBD5        | 4.166712755 | 10.5640343  | 3.345180409 |
| 4.903800443  |              |             |             |             |
| GPR1-AS      | GPR1-AS      | 0           | 0.880336191 | 0           |
| OGFR-AS1     | OGFR-AS1     |             | 4.166712755 | 18.48706002 |
| 6.690360818  | 10.78836098  |             |             |             |
| OSGEPL1-AS1  | OSGEPL1-AS1  |             | 23.95859834 | 29.93143051 |
| 36.7969845   | 33.34584301  |             |             |             |
| CDC42P3      | CDC42P3      | 0           | 0           | 12.2656615  |
| LOC101409256 | LOC101409256 |             | 5.208390943 | 4.401680957 |
| 25.64638313  | 0.980760089  |             |             |             |
| SHC2         | SHC2         | 0           | 1.760672383 | 0           |
| C2orf69      | C2orf69      | 1972.938489 | 1795.885831 | 5.884560532 |
| 1892.866971  |              |             |             | 1966.96608  |
| SPATA24      | SPATA24      | 248.9610871 | 280.8272451 | 126.0017954 |
| 110.82589    |              |             |             |             |
| ZFP36L2      | ZFP36L2      | 3066.700588 | 5210.709917 | 7904.661306 |
| 8439.440563  |              |             |             |             |
| DAZAP1       | DAZAP1       | 835.4259073 | 1563.477076 | 537.4589857 |
| 687.5128222  |              |             |             |             |
| RAB15        | RAB15        | 661.4656498 | 1032.634353 | 648.9649993 |
| 1466.236333  |              |             |             |             |
| LINC00506    | LINC00506    |             | 1.041678189 | 0           |
| 0.980760089  |              |             |             | 0           |
| LAMTOR5-AS1  | LAMTOR5-AS1  |             | 26.04195472 | 36.09378385 |
| 23.41626286  | 42.17268381  |             |             |             |
| LOC387810    | LOC387810    |             | 2.083356377 | 0           |
| TMIGD1       | TMIGD1       | 0           | 0           | 0           |
| LINC00911    | LINC00911    | 0           | 0           | 0           |
| PGBD3        | PGBD3        | 389.5876426 | 248.254806  | 0.980760089 |
| 355.0351521  |              |             |             | 421.4927315 |
| C16orf74     | C16orf74     |             | 10.41678189 | 34.33311147 |
| 6.690360818  | 19.61520177  |             |             |             |
| EFNB2        | EFNB2        | 1.041678189 | 8.803361914 | 21.18614259 |
| 1.961520177  |              |             |             |             |
| FABP3        | FABP3        | 17.70852921 | 18.48706002 | 13.38072164 |
| 10.78836098  |              |             |             |             |

|              |              |             |             |             |             |
|--------------|--------------|-------------|-------------|-------------|-------------|
| DEGS2        | DEGS2        | 7.291747321 | 2.641008574 | 14.49578177 |             |
| 12.74988115  |              |             |             |             |             |
| RPS6KA2-IT1  | RPS6KA2-IT1  | 0           | 0           | 3.345180409 | 0           |
| LOC100506639 | LOC100506639 | 209.3773159 |             | 154.0588335 |             |
| 478.3607985  | 298.151067   |             |             |             |             |
| LOC101928093 | LOC101928093 | 0           | 0           | 3.345180409 | 0           |
| XYLT1        | XYLT1        | 302.0866747 | 625.0386959 | 210.7463658 |             |
| 333.4584301  |              |             |             |             |             |
| EFTUD1P1     | EFTUD1P1     |             | 6.250069132 | 7.042689532 |             |
| 1.115060136  | 5.884560532  |             |             |             |             |
| SH2D1B       | SH2D1B       | 0           | 0           | 13.38072164 | 2.942280266 |
| SLC5A8       | SLC5A8       | 0           | 0           | 1.115060136 | 5.884560532 |
| CCDC57       | CCDC57       | 561.4645437 | 494.7489396 | 531.883685  |             |
| 626.7056967  |              |             |             |             |             |
| MIR8075      | MIR8075      | 0           | 0.880336191 | 4.460240545 | 0           |
| MIR6882      | MIR6882      | 28.12531109 | 14.08537906 | 4.460240545 |             |
| 15.69216142  |              |             |             |             |             |
| MIR6880      | MIR6880      | 0           | 2.641008574 | 3.345180409 | 0           |
| MIR6877      | MIR6877      | 5.208390943 | 6.16235334  | 6.690360818 |             |
| 4.903800443  |              |             |             |             |             |
| MIR6875      | MIR6875      | 4.166712755 | 1.760672383 | 0           | 0           |
| MIR6874      | MIR6874      | 0           | 0           | 1.961520177 |             |
| MIR6871      | MIR6871      | 4.166712755 | 17.60672383 | 2.230120273 |             |
| 12.74988115  |              |             |             |             |             |
| MIR6870      | MIR6870      | 0           | 0.880336191 | 0           | 0           |
| MIR6869      | MIR6869      | 10.41678189 | 30.8117667  | 13.38072164 |             |
| 6.865320621  |              |             |             |             |             |
| MIR6868      | MIR6868      | 0           | 2.641008574 | 4.460240545 | 0.980760089 |
| RAB39B       | RAB39B       | 998.969383  | 983.3355258 | 883.1276279 |             |
| 1134.739423  |              |             |             |             |             |
| LCE3E        | LCE3E        | 2.083356377 | 0           | 0           | 0           |
| LOC100505625 | LOC100505625 |             | 2.083356377 | 0           | 0           |
| LOC101559451 | LOC101559451 |             | 15.62517283 | 22.00840479 | 0           |
| 13.38072164  | 23.53824213  |             |             |             |             |
| HKR1         | HKR1         | 758.3417214 | 638.2437388 | 1668.129964 |             |
| 1192.604268  |              |             |             |             |             |
| ARL10        | ARL10        | 73.9591514  | 99.47798963 | 42.37228518 |             |
| 194.1904976  |              |             |             |             |             |
| RNF216-IT1   | RNF216-IT1   |             | 1.041678189 | 4.401680957 |             |
| 4.460240545  | 5.884560532  |             |             |             |             |
| GLUD1P3      | GLUD1P3      | 119.7929917 | 181.3492554 | 140.4975772 |             |
| 183.4021366  |              |             |             |             |             |
| SAPCD2       | SAPCD2       | 2033.355824 | 2935.921198 | 909.8890712 |             |
| 1196.527308  |              |             |             |             |             |
| EIF2AK4      | EIF2AK4      | 2166.690632 | 2574.98336  | 1820.893203 |             |
| 2642.167679  |              |             |             |             |             |
| ZNF878       | ZNF878       | 25.00027653 | 18.48706002 | 23.41626286 |             |
| 81.40308736  |              |             |             |             |             |
| PLIN4        | PLIN4        | 55.208944   | 115.3240411 | 52.4078264  |             |
| 81.40308736  |              |             |             |             |             |

|              |              |             |             |             |             |
|--------------|--------------|-------------|-------------|-------------|-------------|
| LRRRC26      | LRRRC26      | 1.041678189 | 7.042689532 | 1.115060136 |             |
| 2.942280266  |              |             |             |             |             |
| SLX4IP       | SLX4IP       | 376.0458261 | 245.6137974 | 324.4824997 |             |
| 200.0750581  |              |             |             |             |             |
| ASB16-AS1    | ASB16-AS1    |             | 638.5487297 | 680.499876  |             |
| 557.5300681  | 651.2246989  |             |             |             |             |
| TAF1A-AS1    | TAF1A-AS1    |             | 13.54181645 | 27.29042193 |             |
| 64.6734879   | 42.17268381  |             |             |             |             |
| TP53TG3D     | TP53TG3D     |             | 0           | 0           | 41.25722504 |
| 16.67292151  |              |             |             |             |             |
| LOC101929372 | LOC101929372 |             | 1.041678189 | 13.20504287 |             |
| 3.345180409  | 2.942280266  |             |             |             |             |
| MIR5703      | MIR5703      | 129.1680954 | 101.238662  | 83.62951022 |             |
| 113.7681703  |              |             |             |             |             |
| MIR5695      | MIR5695      | 0           | 0.880336191 | 0           |             |
| MIR5694      | MIR5694      | 0           | 0           | 2.230120273 | 0           |
| MIR5690      | MIR5690      | 7.291747321 | 3.521344766 | 5.575300681 |             |
| 14.71140133  |              |             |             |             |             |
| MIR5687      | MIR5687      | 0           | 0           | 3.345180409 | 0           |
| C10orf115    | C10orf115    |             | 1.041678189 | 1.760672383 | 0           |
| 0.980760089  |              |             |             |             |             |
| STAG3L5P     | STAG3L5P     |             | 330.2119858 | 320.4423737 |             |
| 380.2355065  | 421.7268381  |             |             |             |             |
| ST3GAL6-AS1  | ST3GAL6-AS1  |             | 0           | 0           | 2.942280266 |
| MIR5587      | MIR5587      | 2.083356377 | 3.521344766 | 0           | 0           |
| C3orf67      | C3orf67      | 52.08390943 | 56.34151625 | 31.22168382 |             |
| 83.36460754  |              |             |             |             |             |
| KANK3        | KANK3        | 175.0019357 | 214.8020307 | 120.4264947 |             |
| 161.8254146  |              |             |             |             |             |
| MMS22L       | MMS22L       | 1936.479753 | 2729.92253  | 1235.486631 |             |
| 1670.234431  |              |             |             |             |             |
| KLHL6-AS1    | KLHL6-AS1    |             | 3.125034566 | 16.72638764 |             |
| 7.805420954  | 15.69216142  |             |             |             |             |
| C16orf3      | C16orf3      | 0           | 0           | 1.961520177 |             |
| KLHDC8B      | KLHDC8B      | 63.54236951 | 74.82857627 | 108.1608332 |             |
| 161.8254146  |              |             |             |             |             |
| KLRG2        | KLRG2        | 13.54181645 | 4.401680957 | 0           | 10.78836098 |
| SLC25A42     | SLC25A42     |             | 1004.177774 | 1165.565117 |             |
| 996.8637618  | 1211.23871   |             |             |             |             |
| ZNF33BP1     | ZNF33BP1     |             | 0           | 0           | 6.865320621 |
| KIAA1024L    | KIAA1024L    |             | 0           | 1.760672383 | 0           |
| 0.980760089  |              |             |             |             |             |
| ALG1L9P      | ALG1L9P      | 70.83411683 | 67.78588674 | 121.5415549 |             |
| 115.7296905  |              |             |             |             |             |
| DIAPH3-AS2   | DIAPH3-AS2   |             | 7.291747321 | 3.521344766 | 0           |
| 2.942280266  |              |             |             |             |             |
| ANKRD20A19P  | ANKRD20A19P  |             | 1.041678189 | 0           | 3.345180409 |
| 0.980760089  |              |             |             |             |             |
| CNKSR3       | CNKSR3       | 8.33342551  | 5.282017149 | 21.18614259 |             |
| 9.807600887  |              |             |             |             |             |

|              |              |             |             |             |             |
|--------------|--------------|-------------|-------------|-------------|-------------|
| NUDT18       | NUDT18       | 625.0069132 | 558.1331454 | 603.2475337 |             |
| 610.0327752  |              |             |             |             |             |
| NARR         | NARR         | 435.4214829 | 197.1953069 | 212.976486  |             |
| 128.4795716  |              |             |             |             |             |
| ZC3H6        | ZC3H6        | 100.0011061 | 203.3576602 | 476.1306782 |             |
| 277.5551051  |              |             |             |             |             |
| LOC100996342 | LOC100996342 | 0           | 0           | 6.690360818 | 0           |
| MANEA-AS1    | MANEA-AS1    | 46.87551849 |             | 116.2043773 |             |
| 124.8867353  | 77.480047    |             |             |             |             |
| LINC00539    | LINC00539    | 337.5037331 |             | 589.8252483 |             |
| 95.89517172  | 176.536816   |             |             |             |             |
| FRY-AS1      | FRY-AS1      | 7.291747321 | 5.282017149 | 4.460240545 |             |
| 11.76912106  |              |             |             |             |             |
| FT0-IT1      | FT0-IT1      | 31.25034566 | 17.60672383 | 55.75300681 |             |
| 31.38432284  |              |             |             |             |             |
| MYCBP2-AS1   | MYCBP2-AS1   | 104.1678189 |             | 118.8453858 |             |
| 137.1523968  | 105.9220896  |             |             |             |             |
| LOC100996385 | LOC100996385 | 0           | 0           | 3.345180409 |             |
| 1.961520177  |              |             |             |             |             |
| PRRT3-AS1    | PRRT3-AS1    | 89.58432423 |             | 83.63193819 |             |
| 110.3909535  | 94.15296851  |             |             |             |             |
| ZNF598       | ZNF598       | 854.1761147 | 1686.724143 | 1023.625205 |             |
| 960.1641268  |              |             |             |             |             |
| HS6ST2       | HS6ST2       | 0           | 64.26454197 | 0           | 35.30736319 |
| LOC100128885 | LOC100128885 | 0           | 0           | 1.115060136 |             |
| 0.980760089  |              |             |             |             |             |
| CRYBG3       | CRYBG3       | 2033.355824 | 1419.982277 | 1006.899303 |             |
| 1017.048212  |              |             |             |             |             |
| HIF1A-AS1    | HIF1A-AS1    | 1479.183028 |             | 1710.49322  |             |
| 2159.871484  | 3271.815656  |             |             |             |             |
| RPS6KA2-AS1  | RPS6KA2-AS1  | 0           | 1.760672383 | 1.115060136 |             |
| 3.923040355  |              |             |             |             |             |
| ITPKB-IT1    | ITPKB-IT1    | 7.291747321 |             | 8.803361914 |             |
| 12.2656615   | 14.71140133  |             |             |             |             |
| OXCT1-AS1    | OXCT1-AS1    | 884.3847822 |             | 724.5166856 |             |
| 467.2101971  | 611.9942953  |             |             |             |             |
| ZNF350-AS1   | ZNF350-AS1   | 5.208390943 |             | 0.880336191 | 0           |
| 4.903800443  |              |             |             |             |             |
| NPTN-IT1     | NPTN-IT1     | 62.50069132 |             | 63.38420578 |             |
| 32.33674395  | 92.19144833  |             |             |             |             |
| SGOL1-AS1    | SGOL1-AS1    | 1059.386718 |             | 846.8834162 |             |
| 413.6873106  | 546.2833694  |             |             |             |             |
| LOC101241902 | LOC101241902 | 8.33342551  |             | 8.803361914 | 0           |
| 0.980760089  |              |             |             |             |             |
| LINC00398    | LINC00398    | 4.166712755 |             | 1.760672383 |             |
| 21.18614259  | 6.865320621  |             |             |             |             |
| RNF219-AS1   | RNF219-AS1   | 1181.263066 |             | 1065.206792 |             |
| 1427.276974  | 1248.507593  |             |             |             |             |
| HM13-AS1     | HM13-AS1     | 33.33370204 |             | 29.93143051 |             |
| 28.99156354  | 14.71140133  |             |             |             |             |

|              |              |             |             |             |             |             |             |
|--------------|--------------|-------------|-------------|-------------|-------------|-------------|-------------|
| CCKBR        | CCKBR        | 0           | 1.760672383 | 0           | 4.903800443 |             |             |
| MRPL21       | MRPL21       | 2914.615572 |             | 2660.375971 | 2339.396166 |             |             |
|              |              | 2319.49761  |             |             |             |             |             |
| ACKR3        | ACKR3        | 78.12586415 |             | 47.53815434 | 118.1963744 |             |             |
|              |              | 78.46080709 |             |             |             |             |             |
| SMG8         | SMG8         | 3556.289336 |             | 2506.317137 | 3378.632213 |             |             |
|              |              | 3013.875752 |             |             |             |             |             |
| SOX21-AS1    | SOX21-AS1    |             |             | 5.208390943 | 0           | 0           | 0           |
| EMC3-AS1     | EMC3-AS1     |             |             | 239.5859834 | 311.6390118 |             |             |
|              |              | 151.6481785 |             | 179.4790962 |             |             |             |
| ADAMTSL4-AS1 | ADAMTSL4-AS1 |             |             | 26.04195472 | 60.74319721 |             |             |
|              |              | 84.74457036 |             | 82.38384745 |             |             |             |
| LINC00545    | LINC00545    |             |             | 0           | 0           | 1.115060136 | 0           |
| INTS6-AS1    | INTS6-AS1    |             |             | 103.1261407 | 183.1099278 |             |             |
|              |              | 73.59396899 |             | 175.5560559 |             |             |             |
| LINC00540    | LINC00540    |             |             | 86.45928966 | 91.55496391 |             |             |
|              |              | 286.570455  |             | 340.3237508 |             |             |             |
| LOC101929181 | LOC101929181 |             |             | 0           | 0.880336191 | 0           | 0           |
| LOC102546226 | LOC102546226 |             |             | 1.041678189 | 0.880336191 |             | 0           |
|              |              | 5.884560532 |             |             |             |             |             |
| YWHAEP1      | YWHAEP1      | 2.083356377 |             | 0.880336191 | 0           | 0.980760089 |             |
| MIR642A      | MIR642A      | 1.041678189 |             | 0           | 0           | 0           |             |
| KRT16P2      | KRT16P2      | 0           | 0           | 0           | 0.980760089 |             |             |
| LINC01271    | LINC01271    |             |             | 31.25034566 | 14.08537906 |             |             |
|              |              | 6.690360818 |             | 2.942280266 |             |             |             |
| OSMR-AS1     | OSMR-AS1     |             |             | 0           | 0           | 0           | 0.980760089 |
| LINC01431    | LINC01431    |             |             | 5.208390943 | 14.96571525 |             |             |
|              |              | 6.690360818 |             | 1.961520177 |             |             |             |
| SNCA-AS1     | SNCA-AS1     |             |             | 0           | 0.880336191 | 0           | 0           |
| CCDC182      | CCDC182      | 0           | 0           | 0           | 0.980760089 |             |             |
| CCL3L1       | CCL3L1       | 52.08390943 |             | 92.4353001  | 117.0813143 |             |             |
|              |              | 257.9399033 |             |             |             |             |             |
| PACS1        | PACS1        | 2158.357207 |             | 4534.611722 | 3403.163536 |             |             |
|              |              | 4422.24724  |             |             |             |             |             |
| GLDN         | GLDN         | 0           | 0           | 2.230120273 | 0           |             |             |
| LOC100101148 | LOC100101148 |             |             | 20.83356377 | 40.49546481 |             |             |
|              |              | 52.4078264  |             | 38.24964346 |             |             |             |
| NUDT4P2      | NUDT4P2      | 5664.64599  |             | 4216.810357 | 5317.72179  |             |             |
|              |              | 4844.954838 |             |             |             |             |             |
| TVP23B       | TVP23B       | 3198.993717 |             | 1790.603813 | 4308.592367 |             |             |
|              |              | 2797.127773 |             |             |             |             |             |
| ZNF253       | ZNF253       | 871.8846439 |             | 495.6292758 | 1683.740806 |             |             |
|              |              | 1197.508068 |             |             |             |             |             |
| KRTAP5-8     | KRTAP5-8     |             |             | 0           | 0           | 0           | 0.980760089 |
| MEX3B        | MEX3B        | 0           | 4.401680957 | 15.61084191 | 7.846080709 |             |             |
| ANKRD61      | ANKRD61      | 39.58377117 |             | 47.53815434 | 79.16926967 |             |             |
|              |              | 26.48052239 |             |             |             |             |             |
| LOC441155    | LOC441155    |             |             | 19.79188559 | 9.683698106 |             |             |
|              |              | 23.41626286 |             | 10.78836098 |             |             |             |
| DGCR6        | DGCR6        | 77.08418596 |             | 58.98252483 | 162.7987799 |             |             |

|              |              |             |             |             |             |
|--------------|--------------|-------------|-------------|-------------|-------------|
| 157.9023743  |              |             |             |             |             |
| MST1L        | MST1L        | 1.041678189 | 3.521344766 | 12.2656615  |             |
| 4.903800443  |              |             |             |             |             |
| DDX51        | DDX51        | 2376.067948 | 1674.399436 | 1874.416089 |             |
| 1823.233005  |              |             |             |             |             |
| AAMDC        | AAMDC        | 475.005254  | 420.8006995 | 401.4216491 |             |
| 313.8432284  |              |             |             |             |             |
| PFN4         | PFN4         | 2.083356377 | 3.521344766 | 7.805420954 |             |
| 10.78836098  |              |             |             |             |             |
| XRCC2        | XRCC2        | 831.2591946 | 1558.195059 | 576.4860904 |             |
| 1277.930396  |              |             |             |             |             |
| MTDH         | MTDH         | 6862.575907 | 7249.568536 | 7072.826444 |             |
| 5757.06172   |              |             |             |             |             |
| LOC220729    | LOC220729    |             | 681.2575354 | 786.140219  |             |
| 652.3101797  | 645.3401383  |             |             |             |             |
| LOC101927204 | LOC101927204 |             | 289.5865365 | 284.3485898 |             |
| 240.8529894  | 324.6315893  |             |             |             |             |
| LOC101060385 | LOC101060385 | 0           | 0           | 0           | 0.980760089 |
| LOC101927501 | LOC101927501 | 2.083356377 | 0           | 0           | 72.47890886 |
| 0            |              |             |             |             |             |
| LOC101928259 | LOC101928259 | 2.083356377 | 3.521344766 |             |             |
| 5.575300681  | 4.903800443  |             |             |             |             |
| AADACL2-AS1  | AADACL2-AS1  | 0           | 0           | 1.115060136 | 0           |
| LINC01473    | LINC01473    | 5.208390943 | 3.521344766 |             |             |
| 10.03554123  | 6.865320621  |             |             |             |             |
| LINC01213    | LINC01213    | 0           | 0           | 4.460240545 | 0           |
| LOC101929241 | LOC101929241 | 78.12586415 | 70.42689532 |             |             |
| 103.7005927  | 132.402612   |             |             |             |             |
| NUTM2B       | NUTM2B       | 0           | 0.880336191 | 0           |             |
| MIR6780A     | MIR6780A     | 3.125034566 | 4.401680957 |             |             |
| 5.575300681  | 0            |             |             |             |             |
| MIR6779      | MIR6779      | 16.66685102 | 19.36739621 | 5.575300681 |             |
| 17.6536816   |              |             |             |             |             |
| MIR6778      | MIR6778      | 37.50041479 | 34.33311147 | 11.15060136 |             |
| 21.57672195  |              |             |             |             |             |
| MIR6777      | MIR6777      | 2.083356377 | 10.5640343  | 1.115060136 |             |
| 9.807600887  |              |             |             |             |             |
| MIR6776      | MIR6776      | 6.250069132 | 7.923025723 | 0           | 5.884560532 |
| MIR6775      | MIR6775      | 47.91719668 | 75.70891246 | 39.02710477 |             |
| 50.01876452  |              |             |             |             |             |
| MIR6774      | MIR6774      | 2.083356377 | 4.401680957 | 11.15060136 |             |
| 31.38432284  |              |             |             |             |             |
| MROH2A       | MROH2A       | 0           | 1.760672383 | 0           |             |
| MIR7846      | MIR7846      | 1641.684825 | 969.2501468 | 427.0680322 |             |
| 714.9741046  |              |             |             |             |             |
| MIR6830      | MIR6830      | 2.083356377 | 0           | 0           | 1.961520177 |
| LOC728323    | LOC728323    |             | 95.83439336 | 147.016144  |             |
| 166.1439603  | 152.9985738  |             |             |             |             |
| FUT1         | FUT1         | 14.58349464 | 7.923025723 | 0           | 4.903800443 |
| LOC101927142 | LOC101927142 | 0           | 0.880336191 | 0           |             |

|              |              |             |             |             |             |
|--------------|--------------|-------------|-------------|-------------|-------------|
| 6.865320621  |              |             |             |             |             |
| LINC01494    | LINC01494    | 0           | 0           | 1.115060136 |             |
| 2.942280266  |              |             |             |             |             |
| NCK1-AS1     | NCK1-AS1     | 340.6287677 |             | 382.0659071 |             |
| 168.3740806  | 289.3242262  |             |             |             |             |
| AIM1         | AIM1         | 4377.131749 | 6435.257559 | 4674.332091 |             |
| 5020.510894  |              |             |             |             |             |
| C1orf189     | C1orf189     | 12.50013826 |             | 4.401680957 |             |
| 7.805420954  | 1.961520177  |             |             |             |             |
| GTPBP1       | GTPBP1       | 3924.001737 | 4540.774075 | 4968.707967 |             |
| 4682.148663  |              |             |             |             |             |
| C12orf40     | C12orf40     | 3.125034566 |             | 5.282017149 |             |
| 13.38072164  | 5.884560532  |             |             |             |             |
| ACER2        | ACER2        | 37.50041479 | 29.93143051 | 97.01023186 |             |
| 22.55748204  |              |             |             |             |             |
| ZNF391       | ZNF391       | 39.58377117 | 36.97412004 | 75.82408927 |             |
| 92.19144833  |              |             |             |             |             |
| LINC01289    | LINC01289    | 0           | 0           | 1.115060136 |             |
| 4.903800443  |              |             |             |             |             |
| CHKB-CPT1B   | CHKB-CPT1B   | 2259.399991 |             | 3856.752855 |             |
| 2485.469044  | 3564.082162  |             |             |             |             |
| GBP7         | GBP7         | 20.83356377 | 0.880336191 | 80.28432981 |             |
| 3.923040355  |              |             |             |             |             |
| TMEM41A      | TMEM41A      | 1495.849879 | 1355.717735 | 1431.737215 |             |
| 1172.989066  |              |             |             |             |             |
| GFM1         | GFM1         | 9290.727765 | 5695.775159 | 8340.649819 |             |
| 7275.278338  |              |             |             |             |             |
| MARK2P9      | MARK2P9      | 2.083356377 | 0.880336191 | 0           | 0           |
| NTRK3-AS1    | NTRK3-AS1    | 0           | 0           | 0           | 6.865320621 |
| FBXL14       | FBXL14       | 1539.600363 | 1699.048849 | 1887.796811 |             |
| 1847.752007  |              |             |             |             |             |
| AMDHD1       | AMDHD1       | 39.58377117 | 7.042689532 | 41.25722504 |             |
| 50.01876452  |              |             |             |             |             |
| BANCR        | BANCR        | 0           | 0           | 3.345180409 | 0           |
| LOC100506606 | LOC100506606 | 272.9196854 |             | 205.1183326 |             |
| 175.0644414  | 173.5945357  |             |             |             |             |
| FRG2         | FRG2         | 0           | 0           | 0           | 0.980760089 |
| MAGOH2       | MAGOH2       | 1.041678189 | 0           | 1.115060136 | 0           |
| AKAP10       | AKAP10       | 3286.494685 | 2819.716821 | 3280.506921 |             |
| 3136.470764  |              |             |             |             |             |
| PRSS46       | PRSS46       | 0           | 0           | 2.942280266 |             |
| FAM83C       | FAM83C       | 3.125034566 | 10.5640343  | 10.03554123 | 0           |
| DNAAF1       | DNAAF1       | 25.00027653 | 44.89714576 | 35.68192436 |             |
| 40.21116364  |              |             |             |             |             |
| 3-Mar        | 3-Mar        | 391.670999  | 254.4171593 | 423.7228518 |             |
| 272.6513047  |              |             |             |             |             |
| NAT8L        | NAT8L        | 0           | 8.803361914 | 0           | 0           |
| HSP90B2P     | HSP90B2P     | 15.62517283 |             | 14.08537906 |             |
| 14.49578177  | 7.846080709  |             |             |             |             |
| CNTNAP3B     | CNTNAP3B     | 0           | 0           | 0           | 1.961520177 |

|                 |              |               |             |   |
|-----------------|--------------|---------------|-------------|---|
| LINC00618       | LINC00618    | 5.208390943   | 13.20504287 |   |
| 7.805420954     | 6.865320621  |               |             |   |
| AARD AARD       | 59.37565676  | 82.751602     | 1.115060136 |   |
| 18.63444168     |              |               |             |   |
| CYP2A6 CYP2A6   | 1.041678189  | 0 0           | 0           |   |
| CHRN2 CHRN2     | 5.208390943  | 8.803361914   | 18.95602232 |   |
| 10.78836098     |              |               |             |   |
| LOC101929340    | LOC101929340 | 2.083356377   | 5.282017149 |   |
| 6.690360818     | 5.884560532  |               |             |   |
| ZNF827 ZNF827   | 126.0430608  | 229.767746    | 491.7415201 |   |
| 291.2857463     |              |               |             |   |
| LOC339539       | LOC339539    | 1.041678189   | 2.641008574 | 0 |
| 0.980760089     |              |               |             |   |
| LOC388780       | LOC388780    | 3.125034566   | 2.641008574 |   |
| 4.460240545     | 9.807600887  |               |             |   |
| COL20A1 COL20A1 | 0 0          | 0 1.961520177 |             |   |
| IL21-AS1        | IL21-AS1     | 156.2517283   | 261.4598489 |   |
| 471.6704376     | 927.7990439  |               |             |   |
| LINC01111       | LINC01111    | 0 0           | 1.115060136 | 0 |
| LINC01100       | LINC01100    | 2.083356377   | 5.282017149 | 0 |
| 0               |              |               |             |   |
| LINC01057       | LINC01057    | 3.125034566   | 0 0         |   |
| 6.865320621     |              |               |             |   |
| NBPF25P NBPF25P | 740.6331922  | 804.627279    | 1139.591459 |   |
| 803.2425126     |              |               |             |   |
| ARMC2-AS1       | ARMC2-AS1    | 1.041678189   | 3.521344766 |   |
| 3.345180409     | 6.865320621  |               |             |   |
| NPC2 NPC2       | 1271.889068  | 1775.638098   | 2718.516612 |   |
| 1411.313768     |              |               |             |   |
| AHCTF1P1        | AHCTF1P1     | 23.95859834   | 44.01680957 |   |
| 35.68192436     | 29.42280266  |               |             |   |
| FAM87B FAM87B   | 18.7502074   | 15.84605145   | 25.64638313 |   |
| 20.59596186     |              |               |             |   |
| LINC00337       | LINC00337    | 40.62544936   | 88.03361914 |   |
| 5.575300681     | 40.21116364  |               |             |   |
| ZNF433 ZNF433   | 37.50041479  | 67.78588674   | 157.2234792 |   |
| 201.0558182     |              |               |             |   |
| ZNF99 ZNF99     | 0 0          | 2.230120273   | 0.980760089 |   |
| IRAK1BP1        | IRAK1BP1     | 190.6271085   | 253.5368231 |   |
| 134.9222765     | 230.4786208  |               |             |   |
| GBP3 GBP3       | 1103.137202  | 692.8245827   | 1614.607077 |   |
| 872.8764789     |              |               |             |   |
| LGR4 LGR4       | 17.70852921  | 41.375801     | 5.575300681 |   |
| 28.44204257     |              |               |             |   |
| ADI1 ADI1       | 7201.121318  | 5664.963392   | 5318.83685  |   |
| 4619.380018     |              |               |             |   |
| WDR41 WDR41     | 1659.393355  | 1705.211203   | 1294.584818 |   |
| 1846.771247     |              |               |             |   |
| DISC1FP1        | DISC1FP1     | 4.166712755   | 2.641008574 |   |
| 13.38072164     | 1.961520177  |               |             |   |



|                 |               |               |               |
|-----------------|---------------|---------------|---------------|
| LOC100506688    | LOC100506688  | 351.0455496   | 222.7250564   |
| 55.75300681     | 66.69168603   |               |               |
| LOC100996447    | LOC100996447  | 21.87524196   | 100.3583258   |
| 40.14216491     | 46.09572417   |               |               |
| LOC103021295    | LOC103021295  | 1939.604787   | 2547.692938   |
| 1471.87938      | 1876.19405    |               |               |
| RALGAPA1P       | RALGAPA1P     | 1442.724291   | 1380.367148   |
| 1949.125118     | 1311.276239   |               |               |
| RPL24 RPL24     | 7675.084894   | 8381.680879   | 9183.635282   |
| 8051.059568     |               |               |               |
| LOC440311       | LOC440311     | 3.125034566   | 2.641008574   |
| 3.345180409     | 0             |               |               |
| SRGAP2-AS1      | SRGAP2-AS1    | 4.166712755   | 0 0           |
| 13.73064124     |               |               |               |
| LOC102288414    | LOC102288414  | 5700.063049   | 4660.499797   |
| 4412.292959     | 4404.593558   |               |               |
| CPTP CPTP       | 1177.096353   | 1196.376884   | 885.3577482   |
| 784.6080709     |               |               |               |
| PLEKHG1 PLEKHG1 | 92.70935879   | 169.9048849   | 233.0475685   |
| 372.6888337     |               |               |               |
| RPA1 RPA1       | 15581.42235   | 13402.23818   | 13489.99753   |
| 13192.20395     |               |               |               |
| DCUN1D3 DCUN1D3 | 280.2114328   | 260.5795127   | 270.9596131   |
| 174.5752958     |               |               |               |
| TRIL TRIL       | 2.083356377   | 57.22185244   | 0 12.74988115 |
| CCAT1 CCAT1     | 1.041678189   | 0 0           | 5.884560532   |
| MIR6890 MIR6890 | 6.250069132   | 9.683698106   | 11.15060136   |
| 15.69216142     |               |               |               |
| MIR7703 MIR7703 | 10756.36898   | 6523.291179   | 9019.721442   |
| 8051.059568     |               |               |               |
| DNAH17-AS1      | DNAH17-AS1    | 3.125034566   | 0 7.805420954 |
| 0.980760089     |               |               |               |
| PYCARDOS        | PYCARDOS      | 1003.136096   | 959.5664487   |
| 259.8090118     | 433.4959592   |               |               |
| TAS2R42 TAS2R42 | 0 1.760672383 | 0             | 0             |
| LOC100507642    | LOC100507642  | 70.83411683   | 38.73479242   |
| 95.89517172     | 84.34536763   |               |               |
| CD81-AS1        | CD81-AS1      | 575.0063602   | 288.7502708   |
| 457.1746559     | 151.0370537   |               |               |
| LOC102467073    | LOC102467073  | 19.79188559   | 12.32470668   |
| 18.95602232     | 10.78836098   |               |               |
| LOC101928370    | LOC101928370  | 537.5059454   | 465.6978453   |
| 231.9325083     | 426.6306386   |               |               |
| ZNF852 ZNF852   | 139.5848773   | 140.8537906   | 201.8258847   |
| 158.8831344     |               |               |               |
| LINC01108       | LINC01108     | 0 2.641008574 | 0             |
| 1.961520177     |               |               |               |
| FLJ31356        | FLJ31356      | 0 1.760672383 | 8.92048109    |
| 0               |               |               |               |
| LOC100287098    | LOC100287098  | 359.3789751   | 494.7489396   |

|              |              |             |             |             |             |
|--------------|--------------|-------------|-------------|-------------|-------------|
| 245.31323    | 384.4579548  |             |             |             |             |
| MIR6719      | MIR6719      | 0           | 0.880336191 | 17.84096218 | 1.961520177 |
| TMEM183B     | TMEM183B     |             | 4799.011415 | 3516.062749 |             |
| 3635.096044  | 3820.060545  |             |             |             |             |
| CCNK         | CCNK         | 577.0897165 | 836.3193819 | 835.1800421 |             |
| 539.4180488  |              |             |             |             |             |
| LOC101593348 | LOC101593348 |             | 18.7502074  | 21.12806859 |             |
| 46.83252572  | 7.846080709  |             |             |             |             |
| MIR6069      | MIR6069      | 0           | 0           | 2.230120273 | 0           |
| MIR1199      | MIR1199      | 1.041678189 | 1.760672383 | 0           | 2.942280266 |
| LOC102546298 | LOC102546298 | 0           | 0           | 2.230120273 |             |
| 2.942280266  |              |             |             |             |             |
| ACTG1P4      | ACTG1P4      | 0           | 0.880336191 | 0           | 0.980760089 |
| LINC00850    | LINC00850    |             | 1.041678189 | 0           | 0           |
| MIR6755      | MIR6755      | 21.87524196 | 20.2477324  | 11.15060136 | 0           |
| 17.6536816   |              |             |             |             |             |
| MIR6754      | MIR6754      | 7.291747321 | 1.760672383 | 4.460240545 |             |
| 12.74988115  |              |             |             |             |             |
| MIR6753      | MIR6753      | 45.8338403  | 42.25613719 | 22.30120273 |             |
| 35.30736319  |              |             |             |             |             |
| MIR6741      | MIR6741      | 9.375103698 | 15.84605145 | 23.41626286 |             |
| 14.71140133  |              |             |             |             |             |
| NEXN-AS1     | NEXN-AS1     |             | 2.083356377 | 0           | 3.345180409 |
| 0.980760089  |              |             |             |             |             |
| MIR6084      | MIR6084      | 46.87551849 | 41.375801   | 134.9222765 |             |
| 63.74940576  |              |             |             |             |             |
| MIR6080      | MIR6080      | 0           | 3.521344766 | 0           | 0           |
| MIR6739      | MIR6739      | 7.291747321 | 15.84605145 | 3.345180409 |             |
| 10.78836098  |              |             |             |             |             |
| MIR6748      | MIR6748      | 39.58377117 | 37.85445623 | 54.63794668 |             |
| 33.34584301  |              |             |             |             |             |
| MIR6738      | MIR6738      | 1.041678189 | 4.401680957 | 0           | 0           |
| MIR6747      | MIR6747      | 84.37593328 | 57.22185244 | 84.74457036 |             |
| 76.49928692  |              |             |             |             |             |
| MIR6737      | MIR6737      | 4.166712755 | 7.923025723 | 4.460240545 |             |
| 3.923040355  |              |             |             |             |             |
| MIR6746      | MIR6746      | 1.041678189 | 0.880336191 | 0           | 2.942280266 |
| MIR6736      | MIR6736      | 1.041678189 | 2.641008574 | 3.345180409 |             |
| 0.980760089  |              |             |             |             |             |
| MIR6734      | MIR6734      | 3.125034566 | 4.401680957 | 7.805420954 |             |
| 9.807600887  |              |             |             |             |             |
| MESP2        | MESP2        | 6.250069132 | 4.401680957 | 0           | 0           |
| MIR6743      | MIR6743      | 7.291747321 | 3.521344766 | 7.805420954 |             |
| 7.846080709  |              |             |             |             |             |
| MIR6733      | MIR6733      | 63.54236951 | 30.8117667  | 78.05420954 |             |
| 54.92256497  |              |             |             |             |             |
| MIR6731      | MIR6731      | 20.83356377 | 29.05109432 | 32.33674395 |             |
| 12.74988115  |              |             |             |             |             |
| MIR6732      | MIR6732      | 26.04195472 | 14.96571525 | 22.30120273 |             |
| 28.44204257  |              |             |             |             |             |

|             |         |             |             |             |
|-------------|---------|-------------|-------------|-------------|
| MIR6742     | MIR6742 | 6.250069132 | 7.923025723 | 8.92048109  |
| 2.942280266 |         |             |             |             |
| MIR6729     | MIR6729 | 5.208390943 | 3.521344766 | 3.345180409 |
| 0.980760089 |         |             |             |             |
| MIR6728     | MIR6728 | 394.7960335 | 215.6823669 | 264.2692523 |
| 345.2275512 |         |             |             |             |
| MIR6727     | MIR6727 | 16.66685102 | 27.29042193 | 11.15060136 |
| 8.826840798 |         |             |             |             |
| MIR6726     | MIR6726 | 1.041678189 | 0           | 3.345180409 |
|             |         |             |             | 1.961520177 |
| MIR6723     | MIR6723 | 0           | 2.641008574 | 1.115060136 |
|             |         |             |             | 1.961520177 |
| IP05P1      | IP05P1  | 180.2103266 | 444.5697767 | 438.2186336 |
| 419.765318  |         |             |             |             |
| FSBP        | FSBP    | 193.7521431 | 345.091787  | 364.6246646 |
| 316.7855086 |         |             |             |             |
| MIR6751     | MIR6751 | 0           | 1.760672383 | 2.230120273 |
|             |         |             |             | 1.961520177 |
| MIR6752     | MIR6752 | 34.37538023 | 21.12806859 | 32.33674395 |
| 32.36508293 |         |             |             |             |
| MIR6740     | MIR6740 | 3.125034566 | 3.521344766 | 5.575300681 |
| 3.923040355 |         |             |             |             |
| MIR6750     | MIR6750 | 0           | 0           | 2.230120273 |
|             |         |             |             | 0.980760089 |
| MIR6749     | MIR6749 | 0           | 1.760672383 | 0           |
|             |         |             |             | 0           |
| C9orf85     | C9orf85 | 508.3389561 | 453.3731386 | 433.758393  |
| 463.8995219 |         |             |             |             |
| MYLK3       | MYLK3   | 5.208390943 | 10.5640343  | 6.690360818 |
| 6.865320621 |         |             |             |             |
| MIR6828     | MIR6828 | 3.125034566 | 0           | 0           |
|             |         |             |             | 0           |
| MIR6807     | MIR6807 | 55.208944   | 45.77748195 | 44.60240545 |
| 50.99952461 |         |             |             |             |
| MIR6806     | MIR6806 | 1.041678189 | 0           | 2.230120273 |
|             |         |             |             | 0           |
| MIR6805     | MIR6805 | 4.166712755 | 13.20504287 | 11.15060136 |
| 9.807600887 |         |             |             |             |
| MIR6826     | MIR6826 | 59.37565676 | 33.45277527 | 44.60240545 |
| 62.76864567 |         |             |             |             |
| MIR6825     | MIR6825 | 48.95887487 | 16.72638764 | 50.17770613 |
| 24.51900222 |         |             |             |             |
| MIR6821     | MIR6821 | 119.7929917 | 118.8453858 | 88.08975076 |
| 156.9216142 |         |             |             |             |
| MIR6820     | MIR6820 | 21.87524196 | 19.36739621 | 30.10662368 |
| 31.38432284 |         |             |             |             |
| MIR6819     | MIR6819 | 44.79216211 | 72.1875677  | 11.15060136 |
| 34.3266031  |         |             |             |             |
| MIR6818     | MIR6818 | 1.041678189 | 0           | 0           |
|             |         |             |             | 0           |
| MIR6817     | MIR6817 | 15.62517283 | 8.803361914 | 15.61084191 |
| 11.76912106 |         |             |             |             |
| MIR6816     | MIR6816 | 15.62517283 | 21.12806859 | 8.92048109  |
| 11.76912106 |         |             |             |             |
| MIR6815     | MIR6815 | 0           | 4.401680957 | 2.230120273 |
|             |         |             |             | 2.942280266 |
| MIR6813     | MIR6813 | 2.083356377 | 6.16235334  | 1.115060136 |
| 3.923040355 |         |             |             |             |
| MIR6812     | MIR6812 | 0           | 1.760672383 | 4.460240545 |
|             |         |             |             | 0.980760089 |

|              |              |             |             |             |             |
|--------------|--------------|-------------|-------------|-------------|-------------|
| GOLGA80      | GOLGA80      | 1.041678189 | 0.880336191 | 0           | 2.942280266 |
| MAGEB17      | MAGEB17      | 0           | 0           | 3.923040355 |             |
| TMEM255B     | TMEM255B     | 1.041678189 | 0           | 0           | 0           |
| SMARCA5-AS1  | SMARCA5-AS1  | 1095.845455 | 1250.957728 |             |             |
| 986.8282206  | 1034.701894  |             |             |             |             |
| CYTH3        | CYTH3        | 54.16726581 | 47.53815434 | 683.5318635 |             |
| 421.7268381  |              |             |             |             |             |
| C1orf233     | C1orf233     |             | 58.33397857 | 66.90555055 |             |
| 46.83252572  | 159.8638945  |             |             |             |             |
| POT1         | POT1         | 8.33342551  | 0           | 1.115060136 | 0.980760089 |
| RDH12        | RDH12        | 8.33342551  | 4.401680957 | 6.690360818 | 0           |
| MIR6850      | MIR6850      | 92.70935879 | 104.7600068 | 110.3909535 |             |
| 129.4603317  |              |             |             |             |             |
| MIR7856      | MIR7856      | 1.041678189 | 1.760672383 | 0           | 0           |
| MIR7855      | MIR7855      | 0           | 1.115060136 | 0           |             |
| TPSD1        | TPSD1        | 1.041678189 | 0           | 0           | 0           |
| LOC101929680 | LOC101929680 |             | 2.083356377 | 11.44437049 |             |
| 1.115060136  | 0.980760089  |             |             |             |             |
| CD38         | CD38         | 7726.127126 | 6973.142972 | 2281.413039 |             |
| 2128.249392  |              |             |             |             |             |
| NTSR1        | NTSR1        | 1.041678189 | 0           | 0           | 0           |
| NMI          | NMI          | 4557.342076 | 3347.0382   | 5937.695226 |             |
| 3632.735368  |              |             |             |             |             |
| MIR6842      | MIR6842      | 23.95859834 | 14.96571525 | 14.49578177 |             |
| 15.69216142  |              |             |             |             |             |
| LINC01215    | LINC01215    |             | 47.91719668 | 135.5717735 |             |
| 147.187938   | 155.9408541  |             |             |             |             |
| MIR6851      | MIR6851      | 1.041678189 | 0.880336191 | 2.230120273 |             |
| 1.961520177  |              |             |             |             |             |
| MIR6849      | MIR6849      | 9.375103698 | 14.08537906 | 13.38072164 |             |
| 20.59596186  |              |             |             |             |             |
| MIR6839      | MIR6839      | 0           | 1.760672383 | 7.805420954 | 0           |
| MIR6848      | MIR6848      | 168.7518666 | 166.3835402 | 153.8782988 |             |
| 168.6907353  |              |             |             |             |             |
| ERI3-IT1     | ERI3-IT1     |             | 41.66712755 | 29.05109432 |             |
| 66.90360818  | 44.13420399  |             |             |             |             |
| MIR6836      | MIR6836      | 12.50013826 | 7.042689532 | 0           | 4.903800443 |
| MIR6837      | MIR6837      | 52.08390943 | 34.33311147 | 47.94758586 |             |
| 38.24964346  |              |             |             |             |             |
| MIR6862-1    | MIR6862-1    |             | 6.250069132 | 4.401680957 |             |
| 5.575300681  | 12.74988115  |             |             |             |             |
| MIR8055      | MIR8055      | 9.375103698 | 8.803361914 | 7.805420954 |             |
| 7.846080709  |              |             |             |             |             |
| MIR6769B     | MIR6769B     |             | 7.291747321 | 7.042689532 |             |
| 6.690360818  | 6.865320621  |             |             |             |             |
| HIST1H2BF    | HIST1H2BF    |             | 80.20922053 | 895.3019067 |             |
| 86.97469063  | 89.24916807  |             |             |             |             |
| MIR8071-1    | MIR8071-1    |             | 0           | 0           | 12.74988115 |
| MIR6878      | MIR6878      | 16.66685102 | 7.923025723 | 16.72590204 |             |
| 11.76912106  |              |             |             |             |             |

|              |              |             |             |             |             |
|--------------|--------------|-------------|-------------|-------------|-------------|
| MIR6879      | MIR6879      | 16.66685102 | 19.36739621 | 22.30120273 |             |
| 37.26888337  |              |             |             |             |             |
| MIR8072      | MIR8072      | 169.7935448 | 133.8111011 | 182.8698623 |             |
| 124.5565313  |              |             |             |             |             |
| MIR6883      | MIR6883      | 0           | 0.880336191 | 3.345180409 | 0           |
| MIR6867      | MIR6867      | 0           | 0           | 3.345180409 | 0           |
| MIR6866      | MIR6866      | 9.375103698 | 18.48706002 | 31.22168382 |             |
| 24.51900222  |              |             |             |             |             |
| TTLL13       | TTLL13       | 25.00027653 | 32.57243908 | 35.68192436 |             |
| 43.1534439   |              |             |             |             |             |
| LOC101928682 | LOC101928682 | 0           | 0           | 2.230120273 |             |
| 3.923040355  |              |             |             |             |             |
| LINC00501    | LINC00501    | 0           | 1.041678189 | 3.521344766 | 0           |
| 0            |              |             |             |             |             |
| LOC102467146 | LOC102467146 | 9.375103698 | 9.683698106 |             |             |
| 1.115060136  | 3.923040355  |             |             |             |             |
| LINC01206    | LINC01206    | 0           | 0           | 1.115060136 | 0           |
| ABHD5        | ABHD5        | 1495.849879 | 1408.537906 | 937.7655746 |             |
| 915.0491627  |              |             |             |             |             |
| LOC100507389 | LOC100507389 | 0           | 0           | 0           | 2.942280266 |
| OPLAH        | OPLAH        | 27.08363291 | 47.53815434 | 35.68192436 |             |
| 87.28764789  |              |             |             |             |             |
| MIR7107      | MIR7107      | 6.250069132 | 22.88874098 | 12.2656615  |             |
| 8.826840798  |              |             |             |             |             |
| MIR7106      | MIR7106      | 2.083356377 | 2.641008574 | 5.575300681 |             |
| 0.980760089  |              |             |             |             |             |
| PARGP1       | PARGP1       | 241.6693398 | 220.0840479 | 235.2776888 |             |
| 288.3434661  |              |             |             |             |             |
| MRPL45       | MRPL45       | 3641.706948 | 2270.387038 | 2743.047935 |             |
| 2547.03395   |              |             |             |             |             |
| MIR6862-2    | MIR6862-2    | 6.250069132 | 4.401680957 |             |             |
| 5.575300681  | 12.74988115  |             |             |             |             |
| MIR7108      | MIR7108      | 7.291747321 | 4.401680957 | 3.345180409 |             |
| 6.865320621  |              |             |             |             |             |
| MIR7112      | MIR7112      | 13.54181645 | 8.803361914 | 10.03554123 |             |
| 15.69216142  |              |             |             |             |             |
| MIR8071-2    | MIR8071-2    | 0           | 0           | 0           | 12.74988115 |
| LINC01208    | LINC01208    | 0           | 0           | 0           | 0.980760089 |
| LINC00867    | LINC00867    | 1.041678189 | 0           | 0           | 0           |
| MIR6859-2    | MIR6859-2    | 9.375103698 | 7.042689532 |             |             |
| 6.690360818  | 8.826840798  |             |             |             |             |
| LOC644919    | LOC644919    | 2.083356377 | 0           | 6.690360818 |             |
| 5.884560532  |              |             |             |             |             |
| LOC101927100 | LOC101927100 | 53.12558762 | 80.99092961 |             |             |
| 36.7969845   | 47.07648426  |             |             |             |             |
| VIM-AS1      | VIM-AS1      | 9901.151184 | 8664.268796 | 4871.697735 |             |
| 4324.171231  |              |             |             |             |             |
| RNF139-AS1   | RNF139-AS1   | 18.7502074  | 53.70050768 |             |             |
| 53.52288654  | 35.30736319  |             |             |             |             |
| HERC2P4      | HERC2P4      | 17.70852921 | 9.683698106 | 2.230120273 |             |

|              |              |             |             |             |             |
|--------------|--------------|-------------|-------------|-------------|-------------|
| 3.923040355  |              |             |             |             |             |
| MIR6075      | MIR6075      | 0           | 0.880336191 | 2.230120273 | 0           |
| DNAJB5-AS1   | DNAJB5-AS1   | 0           | 0           | 0           | 3.923040355 |
| LOC102546229 | LOC102546229 | 0           | 0           | 0           | 0.980760089 |
| B4GALT1-AS1  | B4GALT1-AS1  | 105.2094971 |             | 226.2464012 |             |
| 83.62951022  | 177.517576   |             |             |             |             |
| LOC101928401 | LOC101928401 | 0           | 0           | 3.345180409 | 0           |
| FAM83C-AS1   | FAM83C-AS1   | 2.083356377 |             | 4.401680957 |             |
| 1.115060136  | 0            |             |             |             |             |
| LPP-AS1      | LPP-AS1      | 1.041678189 | 0.880336191 | 1.115060136 | 0           |
| IL12A-AS1    | IL12A-AS1    | 55.208944   |             | 56.34151625 |             |
| 8.92048109   | 6.865320621  |             |             |             |             |
| LOC102606465 | LOC102606465 | 698.9660646 |             | 471.8601986 |             |
| 469.4403174  | 484.4954838  |             |             |             |             |
| CLYBL-AS2    | CLYBL-AS2    | 0           | 0           | 0           | 0.980760089 |
| LOC102467147 | LOC102467147 | 1.041678189 |             | 0.880336191 |             |
| 1.115060136  | 4.903800443  |             |             |             |             |
| LOC101928438 | LOC101928438 | 0           | 0           | 3.345180409 | 0           |
| LOC102467081 | LOC102467081 | 9.375103698 |             | 23.76907717 |             |
| 15.61084191  | 26.48052239  |             |             |             |             |
| LOC101927847 | LOC101927847 | 0           | 0           | 1.115060136 | 0           |
| LOC100506985 | LOC100506985 | 192.7104649 |             | 216.5627031 |             |
| 380.2355065  | 300.1125871  |             |             |             |             |
| LOC100505942 | LOC100505942 | 2.083356377 |             | 1.760672383 |             |
| 6.690360818  | 3.923040355  |             |             |             |             |
| ITPR1-AS1    | ITPR1-AS1    | 4.166712755 |             | 10.5640343  | 0           |
| 8.826840798  |              |             |             |             |             |
| LINC01279    | LINC01279    | 2.083356377 |             | 14.96571525 | 0           |
| 0.980760089  |              |             |             |             |             |
| SYP-AS1      | SYP-AS1      | 4.166712755 | 0.880336191 | 17.84096218 |             |
| 6.865320621  |              |             |             |             |             |
| MIR6858      | MIR6858      | 3.125034566 | 3.521344766 | 2.230120273 |             |
| 3.923040355  |              |             |             |             |             |
| MIR6857      | MIR6857      | 7.291747321 | 7.923025723 | 13.38072164 |             |
| 7.846080709  |              |             |             |             |             |
| LOC101926911 | LOC101926911 | 19.79188559 |             | 17.60672383 |             |
| 17.84096218  | 13.73064124  |             |             |             |             |
| MIR6885      | MIR6885      | 8.33342551  | 6.16235334  | 5.575300681 |             |
| 3.923040355  |              |             |             |             |             |
| CCDC78       | CCDC78       | 25.00027653 | 24.64941336 | 36.7969845  |             |
| 48.05724434  |              |             |             |             |             |
| MIR6759      | MIR6759      | 22.91692015 | 22.00840479 | 43.48734531 |             |
| 26.48052239  |              |             |             |             |             |
| MIR6758      | MIR6758      | 123.9597045 | 62.50386959 | 141.6126373 |             |
| 116.7104506  |              |             |             |             |             |
| MIR6769A     | MIR6769A     | 1.041678189 | 0           | 0           |             |
| 1.961520177  |              |             |             |             |             |
| MIR6768      | MIR6768      | 2.083356377 | 1.760672383 | 2.230120273 |             |
| 2.942280266  |              |             |             |             |             |
| MIR6767      | MIR6767      | 29.16698928 | 38.73479242 | 15.61084191 |             |

|              |              |             |             |             |             |
|--------------|--------------|-------------|-------------|-------------|-------------|
| 18.63444168  |              |             |             |             |             |
| MIR6766      | MIR6766      | 6.250069132 | 14.96571525 | 3.345180409 |             |
| 0.980760089  |              |             |             |             |             |
| MIR6838      | MIR6838      | 17.70852921 | 18.48706002 | 37.91204463 |             |
| 39.23040355  |              |             |             |             |             |
| MIR6847      | MIR6847      | 27.08363291 | 10.5640343  | 45.71746559 |             |
| 24.51900222  |              |             |             |             |             |
| LINC01212    | LINC01212    | 0           | 1.760672383 | 0           | 0           |
| SNHG24       | SNHG24       | 0           | 0           | 0.980760089 |             |
| LOC101060091 | LOC101060091 | 139.5848773 | 141.7341268 |             |             |
| 163.91384    | 110.82589    |             |             |             |             |
| MIR6770-2    | MIR6770-2    | 1.041678189 | 0           | 1.115060136 |             |
| 0            |              |             |             |             |             |
| LOC101929295 | LOC101929295 | 13.54181645 | 14.96571525 |             |             |
| 22.30120273  | 25.49976231  |             |             |             |             |
| LOC100129203 | LOC100129203 | 103.1261407 | 44.01680957 |             |             |
| 266.4993726  | 221.65178    |             |             |             |             |
| PANDAR       | PANDAR       | 0           | 0.880336191 | 0           | 0.980760089 |
| RASSF1-AS1   | RASSF1-AS1   | 335.4203768 | 253.5368231 |             |             |
| 153.8782988  | 234.4016612  |             |             |             |             |
| LOC101927379 | LOC101927379 | 0           | 0           | 1.115060136 | 0           |
| LINC01176    | LINC01176    | 3.125034566 | 0.880336191 | 0           | 0           |
| 4.903800443  |              |             |             |             |             |
| LOC101926943 | LOC101926943 | 3065.658909 | 2420.924526 |             |             |
| 2399.609413  | 2728.474567  |             |             |             |             |
| LOC100506860 | LOC100506860 | 105.2094971 | 69.54655912 |             |             |
| 104.8156528  | 91.21068825  |             |             |             |             |
| LOC100147773 | LOC100147773 | 23.95859834 | 46.65781815 |             |             |
| 55.75300681  | 24.51900222  |             |             |             |             |
| TNKS2-AS1    | TNKS2-AS1    | 15.62517283 | 19.36739621 |             |             |
| 47.94758586  | 29.42280266  |             |             |             |             |
| HP09025      | HP09025      | 1.041678189 | 0           | 0           | 0.980760089 |
| LOC100506281 | LOC100506281 | 2.083356377 | 0           | 0           | 0           |
| MIR7109      | MIR7109      | 292.711571  | 250.8958146 | 293.2608158 |             |
| 410.9384772  |              |             |             |             |             |
| MIR7111      | MIR7111      | 95.83439336 | 111.8026963 | 124.8867353 |             |
| 104.9413295  |              |             |             |             |             |
| TDRG1        | TDRG1        | 1.041678189 | 1.760672383 | 20.07108245 | 0           |
| PP14571      | PP14571      | 0           | 0           | 5.575300681 |             |
| CSNK2A3      | CSNK2A3      | 44.79216211 | 21.12806859 | 26.76144327 |             |
| 20.59596186  |              |             |             |             |             |
| SRCIN1       | SRCIN1       | 1.041678189 | 0.880336191 | 0           | 0           |
| HLX-AS1      | HLX-AS1      | 0           | 5.282017149 | 1.115060136 | 1.961520177 |
| LOC101929657 | LOC101929657 | 26.04195472 | 18.48706002 |             |             |
| 7.805420954  | 13.73064124  |             |             |             |             |
| USP12-AS2    | USP12-AS2    | 8.33342551  | 0.880336191 |             |             |
| 32.33674395  | 1.961520177  |             |             |             |             |
| LOC101929608 | LOC101929608 | 13.54181645 | 7.923025723 |             |             |
| 52.4078264   | 36.28812328  |             |             |             |             |
| LOC101928020 | LOC101928020 | 16.66685102 | 17.60672383 |             |             |

|                 |              |             |             |             |             |
|-----------------|--------------|-------------|-------------|-------------|-------------|
| 50.17770613     | 28.44204257  |             |             |             |             |
| MIR6886 MIR6886 | 1.041678189  | 6.16235334  |             | 4.460240545 |             |
| 5.884560532     |              |             |             |             |             |
| LOC101929526    | LOC101929526 | 0           | 0           | 2.230120273 | 0           |
| LOC101927797    | LOC101927797 | 0           | 0           | 0           | 2.942280266 |
| CTB-1202.1      | CTB-1202.1   | 0           | 0           | 0           | 0.980760089 |
| LOC101928539    | LOC101928539 | 0           | 0           | 0           | 1.961520177 |
| LINC01483       | LINC01483    | 2.083356377 |             | 0           | 0           |
| 1.961520177     |              |             |             |             |             |
| ANKRD44-IT1     | ANKRD44-IT1  | 54.16726581 |             | 73.06790389 |             |
| 70.24878858     | 50.99952461  |             |             |             |             |
| DARS-AS1        | DARS-AS1     | 651.0488679 |             | 651.4487817 |             |
| 711.4083669     | 867.9726785  |             |             |             |             |
| LOC101927257    | LOC101927257 | 9.375103698 |             | 17.60672383 |             |
| 4.460240545     | 7.846080709  |             |             |             |             |
| LOC101927631    | LOC101927631 | 59.37565676 |             | 44.89714576 |             |
| 55.75300681     | 40.21116364  |             |             |             |             |
| LOC101929106    | LOC101929106 | 0           | 0           | 0           | 2.942280266 |
| LOC101927770    | LOC101927770 | 9.375103698 |             | 18.48706002 |             |
| 13.38072164     | 6.865320621  |             |             |             |             |
| LOC101927418    | LOC101927418 | 1.041678189 |             | 0           | 1.115060136 |
| 1.961520177     |              |             |             |             |             |
| LOC101928435    | LOC101928435 | 0           | 2.641008574 | 0           | 0           |
| METRNL METRNL   | 61.45901313  | 211.2806859 |             | 130.4620359 |             |
| 215.7672195     |              |             |             |             |             |
| LOC100996579    | LOC100996579 | 123.9597045 |             | 217.4430393 |             |
| 71.36384872     | 99.05676896  |             |             |             |             |
| LOC100505921    | LOC100505921 | 39.58377117 |             | 18.48706002 |             |
| 35.68192436     | 38.24964346  |             |             |             |             |
| LOC101927630    | LOC101927630 | 1.041678189 |             | 0           | 0           |
| 0.980760089     |              |             |             |             |             |
| CTC-436P18.1    | CTC-436P18.1 | 567.7146128 |             | 342.4507785 |             |
| 391.3861078     | 399.1693561  |             |             |             |             |
| SUCLG2-AS1      | SUCLG2-AS1   | 86.45928966 |             | 53.70050768 |             |
| 71.36384872     | 80.42232727  |             |             |             |             |
| ALMS1-IT1       | ALMS1-IT1    | 2.083356377 |             | 8.803361914 |             |
| 3.345180409     | 5.884560532  |             |             |             |             |
| LOC101927668    | LOC101927668 | 2.083356377 |             | 1.760672383 |             |
| 1.115060136     | 0            |             |             |             |             |
| DPYD-AS2        | DPYD-AS2     | 3.125034566 |             | 3.521344766 | 0           |
| 3.923040355     |              |             |             |             |             |
| KCNC4-AS1       | KCNC4-AS1    | 1.041678189 |             | 3.521344766 |             |
| 6.690360818     | 11.76912106  |             |             |             |             |
| LOC101928767    | LOC101928767 | 63.54236951 |             | 35.21344766 |             |
| 56.86806695     | 48.05724434  |             |             |             |             |
| LOC101927058    | LOC101927058 | 0           | 0           | 0           | 0.980760089 |
| USP32P2 USP32P2 | 6.250069132  | 0           | 1.115060136 | 0           | 0.980760089 |
| TRPM2-AS        | TRPM2-AS     | 2.083356377 |             | 0           | 0           |
| 0.980760089     |              |             |             |             |             |
| LOC101929591    | LOC101929591 | 3.125034566 |             | 0           | 1.115060136 |



|              |              |             |             |             |             |
|--------------|--------------|-------------|-------------|-------------|-------------|
| 0            |              |             |             |             |             |
| TCEAL5       | TCEAL5       | 0           | 0           | 1.115060136 | 0           |
| CTC-338M12.4 | CTC-338M12.4 |             |             | 115.6262789 | 183.990264  |
| 166.1439603  | 205.9596186  |             |             |             |             |
| RPLP0P2      | RPLP0P2      | 0           | 0.880336191 | 1.115060136 | 0.980760089 |
| LOC101929319 | LOC101929319 |             |             | 3.125034566 | 5.282017149 |
| 1.115060136  | 1.961520177  |             |             |             |             |
| LOC101929260 | LOC101929260 | 0           | 0           | 5.575300681 | 0           |
| LOC101929452 | LOC101929452 |             |             | 2.083356377 | 0           |
|              |              |             |             |             | 3.345180409 |
|              |              |             |             |             | 7.846080709 |
| LOC101927021 | LOC101927021 |             |             | 347.920515  | 522.9196977 |
| 285.4553949  | 412.8999973  |             |             |             |             |
| LOC101927045 | LOC101927045 |             |             | 185.4187176 | 195.4346345 |
| 262.039132   | 181.4406164  |             |             |             |             |
| LOC101928002 | LOC101928002 |             |             | 4.166712755 | 0.880336191 |
| 5.575300681  | 0            |             |             |             |             |
| ADNP-AS1     | ADNP-AS1     |             |             | 53.12558762 | 39.61512861 |
| 51.29276627  | 39.23040355  |             |             |             |             |
| IL7R         | IL7R         |             |             | 825.0091254 | 1567.878757 |
| 9378.027968  |              |             |             |             | 10416.89179 |
| FBX033       | FBX033       | 2523.986251 |             | 2926.2375   | 2129.76486  |
| 2306.747729  |              |             |             |             |             |
| ARNTL2-AS1   | ARNTL2-AS1   |             |             | 562.5062219 | 377.6642261 |
| 244.1981698  | 208.9018989  |             |             |             |             |
| LOC101927391 | LOC101927391 |             |             | 2.083356377 | 8.803361914 |
| 12.2656615   | 35.30736319  |             |             |             |             |
| LOC101927497 | LOC101927497 |             |             | 57.29230038 | 88.91395534 |
| 98.12529199  | 50.01876452  |             |             |             |             |
| LOC101929549 | LOC101929549 |             |             | 0           | 4.401680957 |
|              |              |             |             |             | 1.115060136 |
|              |              |             |             |             | 0           |
| LOC101926928 | LOC101926928 |             |             | 1.041678189 | 0           |
| LOC101928731 | LOC101928731 |             |             | 0           | 0.880336191 |
|              |              |             |             |             | 3.345180409 |
|              |              |             |             |             | 0           |
| LOC101927550 | LOC101927550 |             |             | 230.2108797 | 310.7586756 |
| 163.91384    | 191.2482173  |             |             |             |             |
| DCTPP1       | DCTPP1       | 10004.27732 |             | 6779.46901  | 6847.584297 |
| 7157.587127  |              |             |             |             |             |
| RP9          | RP9          | 721.8829848 |             | 575.7398692 | 929.9601536 |
| 594.3406137  |              |             |             |             |             |
| LOC100996654 | LOC100996654 |             |             | 8.33342551  | 9.683698106 |
| 5.575300681  | 4.903800443  |             |             |             |             |
| LOC101928882 | LOC101928882 |             |             | 0           | 0           |
| LOC101927243 | LOC101927243 |             |             | 0           | 6.16235334  |
|              |              |             |             |             | 13.38072164 |
|              |              |             |             |             | 9.807600887 |
| LOC101927053 | LOC101927053 |             |             | 0           | 0           |
| 11.76912106  |              |             |             |             | 15.61084191 |
| LOC101927394 | LOC101927394 |             |             | 0           | 0           |
| LOC101928909 | LOC101928909 |             |             | 31.25034566 | 29.93143051 |
| 47.94758586  | 24.51900222  |             |             |             |             |
| LINC01282    | LINC01282    |             |             | 0           | 0           |
|              |              |             |             |             | 0           |
|              |              |             |             |             | 0.980760089 |

|                 |               |               |             |
|-----------------|---------------|---------------|-------------|
| LOC101927795    | LOC101927795  | 1389.598704   | 1206.940918 |
| 1206.495067     | 1470.159373   |               |             |
| RPRM RPRM       | 4.166712755   | 0 20.07108245 | 0           |
| SLC01B3 SLC01B3 | 0 0           | 0 0.980760089 |             |
| GLT1D1 GLT1D1   | 96.87607155   | 322.2030461   | 25.64638313 |
| 112.7874102     |               |               |             |
| LOC101927746    | LOC101927746  | 115.6262789   | 77.46958485 |
| 37.91204463     | 56.88408514   |               |             |
| UBXN10-AS1      | UBXN10-AS1    | 68.75076045   | 107.4010154 |
| 52.4078264      | 85.32612771   |               |             |
| LOC101929010    | LOC101929010  | 90.62600242   | 175.1869021 |
| 71.36384872     | 157.9023743   |               |             |
| LOC101927811    | LOC101927811  | 7.291747321   | 18.48706002 |
| 15.61084191     | 0             |               |             |
| RRP7A RRP7A     | 10980.32979   | 9870.329378   | 9336.398521 |
| 12054.52225     |               |               |             |
| DEPDC1-AS1      | DEPDC1-AS1    | 23.95859834   | 27.29042193 |
| 4.460240545     | 21.57672195   |               |             |
| LOC101927865    | LOC101927865  | 1.041678189   | 2.641008574 |
| 3.345180409     | 6.865320621   |               |             |
| ST3GAL5-AS1     | ST3GAL5-AS1   | 0 1.760672383 | 11.15060136 |
| 0.980760089     |               |               |             |
| SNORD43 SNORD43 | 14.58349464   | 10.5640343    | 11.15060136 |
| 16.67292151     |               |               |             |
| SNORD54 SNORD54 | 11.45846008   | 6.16235334    | 22.30120273 |
| 14.71140133     |               |               |             |
| SNORA33 SNORA33 | 16.66685102   | 26.41008574   | 47.94758586 |
| 39.23040355     |               |               |             |
| ZCCHC14 ZCCHC14 | 32.29202385   | 36.97412004   | 154.9933589 |
| 110.82589       |               |               |             |
| RFTN1 RFTN1     | 6677.15719    | 8110.537332   | 7199.9433   |
| 9464.334856     |               |               |             |
| TET3 TET3       | 131.2514518   | 276.4255641   | 236.3927489 |
| 209.882659      |               |               |             |
| ERICH3 ERICH3   | 0 1.760672383 | 11.15060136   | 0.980760089 |
| SCAMP1-AS1      | SCAMP1-AS1    | 237.502627    | 236.8104355 |
| 380.2355065     | 312.8624683   |               |             |
| PLS3-AS1        | PLS3-AS1      | 0 0.880336191 | 0 0         |
| LINC01284       | LINC01284     | 0 0           | 4.460240545 |
| 3.923040355     |               |               |             |
| RASL10B RASL10B | 5.208390943   | 23.76907717   | 12.2656615  |
| 37.26888337     |               |               |             |
| SUZ12 SUZ12     | 3766.70833    | 6884.229017   | 3253.745478 |
| 3474.832994     |               |               |             |
| MIR505 MIR505   | 0 0           | 0 0.980760089 |             |
| TMED10P1        | TMED10P1      | 31.25034566   | 44.01680957 |
| 130.4620359     | 100.037529    |               |             |
| MGC16142        | MGC16142      | 53.12558762   | 44.01680957 |
| 78.05420954     | 45.11496408   |               |             |
| ZNF766 ZNF766   | 2031.272468   | 1704.330867   | 4527.144153 |

|                           |               |               |               |  |  |
|---------------------------|---------------|---------------|---------------|--|--|
| 3110.971001               |               |               |               |  |  |
| GRHL1 GRHL1               | 134.3764863   | 160.2211868   | 27.87650341   |  |  |
| 113.7681703               |               |               |               |  |  |
| OR2AE1 OR2AE1             | 0 0           | 1.115060136   | 0             |  |  |
| FAM109B FAM109B           | 148.959981    | 176.0672383   | 133.8072164   |  |  |
| 199.094298                |               |               |               |  |  |
| PPP1R27 PPP1R27           | 1.041678189   | 1.760672383   | 0 0.980760089 |  |  |
| NKAPL NKAPL               | 7.291747321   | 2.641008574   | 45.71746559   |  |  |
| 11.76912106               |               |               |               |  |  |
| CDRT15 CDRT15             | 3.125034566   | 9.683698106   | 1.115060136   |  |  |
| 0.980760089               |               |               |               |  |  |
| F8A3 F8A3                 | 578.1313947   | 617.9960064   | 645.6198189   |  |  |
| 815.9923938               |               |               |               |  |  |
| IGIP IGIP                 | 7.291747321   | 26.41008574   | 31.22168382   |  |  |
| 32.36508293               |               |               |               |  |  |
| C8orf48 C8orf48           | 5.208390943   | 6.16235334    | 0 16.67292151 |  |  |
| ITGA11 ITGA11             | 2.083356377   | 3.521344766   | 0 4.903800443 |  |  |
| LRRC18 LRRC18             | 0 1.760672383 | 0 0           | 0             |  |  |
| FAM227A FAM227A           | 3.125034566   | 4.401680957   | 57.98312709   |  |  |
| 11.76912106               |               |               |               |  |  |
| LKAAEAR1 LKAAEAR1         |               | 8.33342551    | 3.521344766   |  |  |
| 6.690360818               | 2.942280266   |               |               |  |  |
| TMEM220 TMEM220           | 23.95859834   | 33.45277527   | 160.5686596   |  |  |
| 50.01876452               |               |               |               |  |  |
| OR11G2 OR11G2             | 0 0           | 0 2.942280266 |               |  |  |
| OR2A7 OR2A7               | 2.083356377   | 4.401680957   | 0 3.923040355 |  |  |
| OR52H1 OR52H1             | 0 0           | 11.15060136   | 0             |  |  |
| OR2A1 OR2A1               | 1.041678189   | 3.521344766   | 0 0           |  |  |
| LOC101927237 LOC101927237 |               | 0 0           | 0 3.923040355 |  |  |
| OR52N2 OR52N2             | 6.250069132   | 4.401680957   | 0 0           |  |  |
| PAGE2B PAGE2B             | 4.166712755   | 1.760672383   | 2.230120273   |  |  |
| 0.980760089               |               |               |               |  |  |
| OR2AK2 OR2AK2             | 0 0           | 0 0.980760089 |               |  |  |
| OR2AG2 OR2AG2             | 2.083356377   | 3.521344766   | 0 22.55748204 |  |  |
| OR10K2 OR10K2             | 0 0           | 0 0.980760089 |               |  |  |
| STAM-AS1 STAM-AS1         |               | 60.41733494   | 71.30723151   |  |  |
| 33.45180409               | 32.36508293   |               |               |  |  |
| MIR133A1HG MIR133A1HG     |               | 12.50013826   | 7.923025723   |  |  |
| 1.115060136               | 2.942280266   |               |               |  |  |
| PRKX-AS1 PRKX-AS1         |               | 4.166712755   | 5.282017149   |  |  |
| 3.345180409               | 7.846080709   |               |               |  |  |
| MED140S MED140S           | 48.95887487   | 65.14487817   | 39.02710477   |  |  |
| 40.21116364               |               |               |               |  |  |
| HCFC1-AS1 HCFC1-AS1       |               | 7.291747321   | 6.16235334    |  |  |
| 4.460240545               | 3.923040355   |               |               |  |  |
| MID1IP1-AS1 MID1IP1-AS1   |               | 9.375103698   | 12.32470668   |  |  |
| 11.15060136               | 16.67292151   |               |               |  |  |
| LOC101927780 LOC101927780 |               | 12.50013826   | 19.36739621   |  |  |
| 7.805420954               | 8.826840798   |               |               |  |  |
| PM20D2 PM20D2             | 553.1311182   | 1332.828994   | 1295.699878   |  |  |

|                 |               |             |             |             |             |
|-----------------|---------------|-------------|-------------|-------------|-------------|
| 1830.098325     |               |             |             |             |             |
| LOC100505592    | LOC100505592  | 4.166712755 | 0           | 0           | 0           |
| DDX26B-AS1      | DDX26B-AS1    | 3.125034566 | 16.72638764 |             |             |
| 3.345180409     | 16.67292151   |             |             |             |             |
| LOC101927178    | LOC101927178  | 1600.017698 | 1133.873015 |             |             |
| 1225.45109      | 1218.10403    |             |             |             |             |
| RTCA-AS1        | RTCA-AS1      | 42.70880574 | 28.17075813 |             |             |
| 61.32830749     | 24.51900222   |             |             |             |             |
| HAGLROS HAGLROS | 0 0.880336191 | 1.115060136 | 0           |             |             |
| LOC101929760    | LOC101929760  | 16.66685102 | 12.32470668 |             |             |
| 15.61084191     | 33.34584301   |             |             |             |             |
| LOC102724153    | LOC102724153  | 154.1683719 | 113.5633687 |             |             |
| 107.0457731     | 203.9980984   |             |             |             |             |
| LINC01422       | LINC01422     | 0           | 0.880336191 | 2.230120273 |             |
| 3.923040355     |               |             |             |             |             |
| OTUD6B-AS1      | OTUD6B-AS1    | 1335.431438 | 1309.940253 |             |             |
| 2249.076295     | 1674.157471   |             |             |             |             |
| MIRLET7BHG      | MIRLET7BHG    | 5.208390943 | 14.08537906 |             |             |
| 46.83252572     | 38.24964346   |             |             |             |             |
| LINC01246       | LINC01246     | 0           | 0           | 0           | 0.980760089 |
| POTEH-AS1       | POTEH-AS1     | 0           | 0           | 0           | 0.980760089 |
| EP300-AS1       | EP300-AS1     | 33.33370204 | 16.72638764 |             |             |
| 64.6734879      | 35.30736319   |             |             |             |             |
| PADI6 PADI6     | 3.125034566   | 0           | 6.690360818 | 3.923040355 |             |
| LOC101927069    | LOC101927069  | 522.9224507 | 514.996672  |             |             |
| 130.4620359     | 101.9990492   |             |             |             |             |
| LOC102723854    | LOC102723854  | 0           | 0           | 0           | 0.980760089 |
| LOC101929512    | LOC101929512  | 19.79188559 | 31.69210289 |             |             |
| 12.2656615      | 16.67292151   |             |             |             |             |
| LOC102723927    | LOC102723927  | 0           | 0.880336191 | 0           |             |
| 4.903800443     |               |             |             |             |             |
| MIATNB MIATNB   | 126.0430608   | 188.391945  | 158.3385393 |             |             |
| 204.9788585     |               |             |             |             |             |
| HORMAD2-AS1     | HORMAD2-AS1   | 113.5429226 | 160.2211868 |             |             |
| 208.5162455     | 203.9980984   |             |             |             |             |
| LANCL1-AS1      | LANCL1-AS1    | 7.291747321 | 9.683698106 |             |             |
| 10.03554123     | 6.865320621   |             |             |             |             |
| LOC102724691    | LOC102724691  | 4.166712755 | 4.401680957 |             |             |
| 3.345180409     | 1.961520177   |             |             |             |             |
| CHKB-AS1        | CHKB-AS1      | 144.7932682 | 175.1869021 |             |             |
| 172.8343211     | 153.9793339   |             |             |             |             |
| LOC102723824    | LOC102723824  | 46.87551849 | 23.76907717 |             |             |
| 15.61084191     | 27.46128248   |             |             |             |             |
| ITGA9-AS1       | ITGA9-AS1     | 1.041678189 | 18.48706002 |             |             |
| 2.230120273     | 1.961520177   |             |             |             |             |
| CHMP1B2P        | CHMP1B2P      | 0           | 0.880336191 | 0           |             |
| 8.826840798     |               |             |             |             |             |
| LRCH4 LRCH4     | 4268.797217   | 4575.987523 | 3163.425607 |             |             |
| 3514.063398     |               |             |             |             |             |
| ZASP ZASP       | 756.258365    | 823.9946752 | 595.4421128 |             |             |

|               |              |             |             |             |
|---------------|--------------|-------------|-------------|-------------|
| 664.9553401   |              |             |             |             |
| POTEF POTEF   | 27.08363291  | 2.641008574 | 1.115060136 |             |
| 0.980760089   |              |             |             |             |
| LOC101928063  | LOC101928063 | 101.0427843 | 183.1099278 |             |
| 157.2234792   | 274.6128248  |             |             |             |
| LOC101927143  | LOC101927143 | 3.125034566 | 0           | 8.92048109  |
| 0             |              |             |             |             |
| LOC102723809  | LOC102723809 | 31.25034566 | 53.70050768 |             |
| 44.60240545   | 27.46128248  |             |             |             |
| LOC102723354  | LOC102723354 | 3.125034566 | 4.401680957 |             |
| 10.03554123   | 7.846080709  |             |             |             |
| LOC101928517  | LOC101928517 | 0           | 0           | 1.961520177 |
| LOC101929715  | LOC101929715 | 11.45846008 | 33.45277527 |             |
| 17.84096218   | 25.49976231  |             |             |             |
| LOC101928886  | LOC101928886 | 4.166712755 | 0.880336191 | 0           |
| 0.980760089   |              |             |             |             |
| C10orf90      | C10orf90     | 0           | 6.16235334  | 0           |
| 0.980760089   |              |             |             |             |
| GLTPD2 GLTPD2 | 9.375103698  | 8.803361914 | 6.690360818 |             |
| 19.61520177   |              |             |             |             |
| COA5 COA5     | 1166.679571  | 1302.017227 | 1445.117937 |             |
| 1533.908779   |              |             |             |             |
| C20orf202     | C20orf202    | 0           | 0.880336191 | 42.37228518 |
| 1.961520177   |              |             |             |             |
| JMJD8 JMJD8   | 7652.167974  | 5429.033293 | 6629.03251  |             |
| 6752.53321    |              |             |             |             |
| CSE1L-AS1     | CSE1L-AS1    | 10.41678189 | 0.880336191 |             |
| 18.95602232   | 1.961520177  |             |             |             |
| LOC101927322  | LOC101927322 | 172.9185793 | 253.5368231 |             |
| 223.0120273   | 211.8441792  |             |             |             |
| LOC101929733  | LOC101929733 | 2.083356377 | 0           | 0           |
| 0.980760089   |              |             |             |             |
| LOC101927720  | LOC101927720 | 21.87524196 | 9.683698106 |             |
| 75.82408927   | 43.1534439   |             |             |             |
| KCTD2 KCTD2   | 663.5490062  | 1505.374887 | 1092.758934 |             |
| 959.1833667   |              |             |             |             |
| LOC100996324  | LOC100996324 | 159.3767629 | 125.0077392 |             |
| 98.12529199   | 126.5180514  |             |             |             |
| LOC101060542  | LOC101060542 | 0           | 0           | 0.980760089 |
| LINC01232     | LINC01232    | 39.58377117 | 44.01680957 |             |
| 70.24878858   | 47.07648426  |             |             |             |
| LINC01477     | LINC01477    | 0           | 0.880336191 | 0           |
| DSCAS DSCAS   | 0            | 0           | 1.115060136 | 1.961520177 |
| LOC101927571  | LOC101927571 | 2.083356377 | 14.96571525 |             |
| 8.92048109    | 5.884560532  |             |             |             |
| LOC101927229  | LOC101927229 | 0           | 0           | 2.230120273 |
| LOC101927166  | LOC101927166 | 4.166712755 | 2.641008574 | 0           |
| 1.115060136   | 3.923040355  |             |             |             |
| NUCB1-AS1     | NUCB1-AS1    | 1631.268044 | 2041.499628 |             |
| 1612.376957   | 1685.926592  |             |             |             |

|                 |              |               |               |  |
|-----------------|--------------|---------------|---------------|--|
| LOC101928571    | LOC101928571 | 68.75076045   | 72.1875677    |  |
| 105.9307129     | 98.07600887  |               |               |  |
| NDUFV2-AS1      | NDUFV2-AS1   | 14.58349464   | 22.00840479   |  |
| 118.1963744     | 57.86484523  |               |               |  |
| MAP3K14 MAP3K14 | 2586.486943  | 5238.000339   | 2872.394911   |  |
| 3816.137505     |              |               |               |  |
| TIMM23B TIMM23B | 716.6745938  | 617.1156702   | 592.0969324   |  |
| 748.3199477     |              |               |               |  |
| GPR89B GPR89B   | 134.3764863  | 157.5801783   | 180.6397421   |  |
| 126.5180514     |              |               |               |  |
| CELA2B CELA2B   | 12.50013826  | 12.32470668   | 4.460240545   |  |
| 8.826840798     |              |               |               |  |
| RYBP RYBP       | 437.5048393  | 1171.727471   | 574.2559702   |  |
| 620.8211361     |              |               |               |  |
| LOC101929224    | LOC101929224 | 8.33342551    | 10.5640343    |  |
| 6.690360818     | 10.78836098  |               |               |  |
| LOC102724246    | LOC102724246 | 10.41678189   | 22.88874098   |  |
| 55.75300681     | 65.71092594  |               |               |  |
| LOC101928710    | LOC101928710 | 21.87524196   | 46.65781815   |  |
| 6.690360818     | 27.46128248  |               |               |  |
| HP09053 HP09053 | 734.383123   | 538.7657492   | 853.0210042   |  |
| 609.0520151     |              |               |               |  |
| LOC101927911    | LOC101927911 | 26.04195472   | 51.93983529   |  |
| 11.15060136     | 3.923040355  |               |               |  |
| GFER GFER       | 923.9685534  | 1076.651162   | 729.2493291   |  |
| 848.3574767     |              |               |               |  |
| HAGHL HAGHL     | 47.91719668  | 125.8880754   | 65.78854804   |  |
| 164.7676949     |              |               |               |  |
| LINC01352       | LINC01352    | 0 0           | 0 1.961520177 |  |
| LOC100507002    | LOC100507002 | 47.91719668   | 62.50386959   |  |
| 30.10662368     | 27.46128248  |               |               |  |
| LINC01504       | LINC01504    | 19.79188559   | 9.683698106   |  |
| 17.84096218     | 1.961520177  |               |               |  |
| LOC101927018    | LOC101927018 | 1.041678189   | 7.042689532   |  |
| 10.03554123     | 10.78836098  |               |               |  |
| LOC101926996    | LOC101926996 | 6.250069132   | 7.923025723 0 |  |
| 9.807600887     |              |               |               |  |
| TMEM108-AS1     | TMEM108-AS1  | 0 0           | 0 2.942280266 |  |
| LOC101927688    | LOC101927688 | 12.50013826   | 7.042689532   |  |
| 34.56686422     | 11.76912106  |               |               |  |
| LOC101927666    | LOC101927666 | 0 4.401680957 | 0 0           |  |
| LOC101927557    | LOC101927557 | 2.083356377   | 2.641008574 0 |  |
| 1.961520177     |              |               |               |  |
| LOC101927539    | LOC101927539 | 0 0           | 5.575300681 0 |  |
| LOC101927730    | LOC101927730 | 467.7135067   | 337.1687613   |  |
| 870.8619664     | 776.7619902  |               |               |  |
| LOC101927829    | LOC101927829 | 0 0           | 0 6.865320621 |  |
| LOC101928514    | LOC101928514 | 0 0           | 2.230120273   |  |
| 4.903800443     |              |               |               |  |
| LOC100420587    | LOC100420587 | 1.041678189   | 12.32470668   |  |

|                 |              |               |             |             |  |
|-----------------|--------------|---------------|-------------|-------------|--|
| 1.115060136     | 12.74988115  |               |             |             |  |
| LOC101928163    | LOC101928163 | 230.2108797   |             | 448.0911214 |  |
| 50.17770613     | 79.44156718  |               |             |             |  |
| C19orf48        | C19orf48     | 8348.009004   |             | 6081.36241  |  |
| 7707.295662     | 7201.721331  |               |             |             |  |
| CCR7 CCR7       | 22496.08216  | 15505.36134   |             | 60276.80579 |  |
| 48664.33484     |              |               |             |             |  |
| LOC101929099    | LOC101929099 | 156.2517283   |             | 169.0245488 |  |
| 113.7361339     | 114.7489304  |               |             |             |  |
| MYADM MYADM     | 1855.228854  | 3740.548477   |             | 1836.504044 |  |
| 2394.035376     |              |               |             |             |  |
| LINC01363       | LINC01363    | 0 0           | 0           | 3.923040355 |  |
| C1orf115        | C1orf115     | 38.54209298   |             | 21.12806859 |  |
| 81.39938995     | 83.36460754  |               |             |             |  |
| AGRN ARN        | 14.58349464  | 86.27294676   |             | 81.39938995 |  |
| 69.6339663      |              |               |             |             |  |
| LOC102724508    | LOC102724508 | 2.083356377   |             | 2.641008574 |  |
| 1.115060136     | 1.961520177  |               |             |             |  |
| LOC101929555    | LOC101929555 | 7.291747321   |             | 6.16235334  |  |
| 11.15060136     | 12.74988115  |               |             |             |  |
| LOC101929767    | LOC101929767 | 77.08418596   |             | 91.55496391 |  |
| 36.7969845      | 69.6339663   |               |             |             |  |
| LOC102724596    | LOC102724596 | 10.41678189   |             | 25.52974955 |  |
| 13.38072164     | 10.78836098  |               |             |             |  |
| SLC14A2-AS1     | SLC14A2-AS1  | 0 0.880336191 | 0           | 0           |  |
| RARA-AS1        | RARA-AS1     | 26.04195472   |             | 24.64941336 |  |
| 11.15060136     | 21.57672195  |               |             |             |  |
| TSPAN10 TSPAN10 | 4.166712755  | 2.641008574   |             | 2.230120273 |  |
| 18.63444168     |              |               |             |             |  |
| LOC101927755    | LOC101927755 | 46.87551849   |             | 34.33311147 |  |
| 71.36384872     | 41.19192372  |               |             |             |  |
| LOC101928001    | LOC101928001 | 5.208390943   |             | 7.923025723 |  |
| 5.575300681     | 4.903800443  |               |             |             |  |
| LOC101927919    | LOC101927919 | 25.00027653   |             | 38.73479242 |  |
| 17.84096218     | 21.57672195  |               |             |             |  |
| LOC101929717    | LOC101929717 | 26.04195472   |             | 7.042689532 |  |
| 34.56686422     | 23.53824213  |               |             |             |  |
| LOC101927950    | LOC101927950 | 0 3.521344766 |             | 2.230120273 |  |
| 4.903800443     |              |               |             |             |  |
| LINC01448       | LINC01448    | 0 0           | 3.345180409 | 0           |  |
| LOC101928674    | LOC101928674 | 17.70852921   |             | 47.53815434 |  |
| 14.49578177     | 33.34584301  |               |             |             |  |
| LOC101928855    | LOC101928855 | 14.58349464   |             | 41.375801   |  |
| 1.115060136     | 13.73064124  |               |             |             |  |
| PHF20 PHF20     | 2100.023228  | 2071.431058   |             | 3160.080426 |  |
| 2763.78193      |              |               |             |             |  |
| ZSCAN22 ZSCAN22 | 620.8402005  | 673.4571864   |             | 853.0210042 |  |
| 770.8774297     |              |               |             |             |  |
| ERCC6L ERCC6L   | 1900.021016  | 1931.457604   |             | 995.7487017 |  |
| 1346.583602     |              |               |             |             |  |

|                 |              |             |             |             |             |
|-----------------|--------------|-------------|-------------|-------------|-------------|
| FBX02 FBX02     | 36.4587366   | 29.05109432 | 103.7005927 |             |             |
| 205.9596186     |              |             |             |             |             |
| FBX010 FBX010   | 125.0013826  | 239.4514441 | 179.5246819 |             |             |
| 266.7667441     |              |             |             |             |             |
| BAALC-AS1       | BAALC-AS1    | 5.208390943 | 4.401680957 |             |             |
| 20.07108245     | 0            |             |             |             |             |
| LINC00515       | LINC00515    | 8.33342551  | 13.20504287 |             |             |
| 25.64638313     | 39.23040355  |             |             |             |             |
| TMED7-TICAM2    | TMED7-TICAM2 | 1514.600086 | 1243.915039 |             |             |
| 1500.870943     | 1199.469588  |             |             |             |             |
| LMF1-AS1        | LMF1-AS1     | 55.208944   | 38.73479242 |             |             |
| 107.0457731     | 106.9028497  |             |             |             |             |
| LOC553103       | LOC553103    | 35.41705842 | 43.13647338 |             |             |
| 75.82408927     | 58.84560532  |             |             |             |             |
| LOC101927102    | LOC101927102 | 568.756291  | 371.5018728 |             |             |
| 526.3083843     | 390.3425153  |             |             |             |             |
| LOC101927272    | LOC101927272 | 381.2542171 | 393.5102776 |             |             |
| 215.2066063     | 262.8437038  |             |             |             |             |
| LOC101928530    | LOC101928530 | 41.66712755 | 24.64941336 |             |             |
| 27.87650341     | 19.61520177  |             |             |             |             |
| LOC101928203    | LOC101928203 | 0           | 2.641008574 | 0           | 0           |
| CHRNA5 CHRNA5   | 585.423142   | 639.124075  | 469.4403174 |             |             |
| 450.1688807     |              |             |             |             |             |
| LOC101928737    | LOC101928737 | 1.041678189 | 0           | 0           | 0           |
| LOC100129697    | LOC100129697 | 0           | 0           | 0           | 0.980760089 |
| LOC101927817    | LOC101927817 | 66.66740408 | 64.26454197 |             |             |
| 50.17770613     | 57.86484523  |             |             |             |             |
| NKPD1 NKPD1     | 4.166712755  | 7.042689532 | 27.87650341 |             |             |
| 3.923040355     |              |             |             |             |             |
| GALNT10 GALNT10 | 2227.107967  | 4343.578769 | 2503.310006 |             |             |
| 2905.011383     |              |             |             |             |             |
| SOCS7 SOCS7     | 105.2094971  | 231.5284183 | 224.1270874 |             |             |
| 183.4021366     |              |             |             |             |             |
| DENND1C DENND1C | 5044.847468  | 4783.746864 | 2641.577463 |             |             |
| 4619.380018     |              |             |             |             |             |
| LOC101060376    | LOC101060376 | 42.70880574 | 54.58084387 |             |             |
| 51.29276627     | 65.71092594  |             |             |             |             |
| VPREB1 VPREB1   | 0            | 12.32470668 | 0           | 1.961520177 |             |
| VCP VCP         | 68202.83773  | 43099.49926 | 40736.49196 |             |             |
| 40482.83418     |              |             |             |             |             |
| BRWD1-AS1       | BRWD1-AS1    | 0           | 2.641008574 | 0           |             |
| 3.923040355     |              |             |             |             |             |
| TEKT4P2 TEKT4P2 | 54.16726581  | 79.23025723 | 47.94758586 |             |             |
| 72.57624656     |              |             |             |             |             |
| LINC01258       | LINC01258    | 7.291747321 | 0.880336191 |             |             |
| 5.575300681     | 0.980760089  |             |             |             |             |
| MAFIP MAFIP     | 425.004701   | 100.3583258 | 462.7499566 |             |             |
| 104.9413295     |              |             |             |             |             |
| LOC101927040    | LOC101927040 | 2.083356377 | 0           | 0           | 0           |
| LINC01503       | LINC01503    | 0           | 0           | 0           | 0.980760089 |



|                 |              |             |             |             |
|-----------------|--------------|-------------|-------------|-------------|
| LCMT1-AS1       | LCMT1-AS1    | 69.79243864 | 60.74319721 |             |
| 70.24878858     | 72.57624656  |             |             |             |
| KLHL31 KLHL31   | 2.083356377  | 5.282017149 | 1.115060136 |             |
| 5.884560532     |              |             |             |             |
| FAM150B FAM150B | 2.083356377  | 4.401680957 | 14.49578177 |             |
| 8.826840798     |              |             |             |             |
| KCTD11 KCTD11   | 97.91774974  | 180.4689192 | 226.3572077 |             |
| 346.2083113     |              |             |             |             |
| CYP27C1 CYP27C1 | 2.083356377  | 0           | 0           | 7.846080709 |
| FAT3 FAT3       | 0            | 0           | 3.923040355 |             |
| OR2L8 OR2L8     | 0            | 0.880336191 | 0           | 0           |
| OR2W3 OR2W3     | 8.33342551   | 8.803361914 | 1.115060136 |             |
| 0.980760089     |              |             |             |             |
| ASTL ASTL       | 25.00027653  | 19.36739621 | 16.72590204 |             |
| 44.13420399     |              |             |             |             |
| C14orf37        | C14orf37     | 2.083356377 | 2.641008574 |             |
| 1.115060136     | 1.961520177  |             |             |             |
| OR2A42 OR2A42   | 1.041678189  | 3.521344766 | 0           | 0           |
| C10orf55        | C10orf55     | 103.1261407 | 30.8117667  |             |
| 92.54999131     | 29.42280266  |             |             |             |
| LCN10 LCN10     | 45.8338403   | 7.923025723 | 128.2319157 |             |
| 56.88408514     |              |             |             |             |
| MED11 MED11     | 1172.92964   | 1066.967464 | 1023.625205 |             |
| 1087.662938     |              |             |             |             |
| SPOPL SPOPL     | 195.8354995  | 361.8181747 | 225.2421475 |             |
| 357.9774324     |              |             |             |             |
| LYRM5 LYRM5     | 414.5879191  | 588.9449121 | 821.7993204 |             |
| 755.1852683     |              |             |             |             |
| TIMM50 TIMM50   | 5994.857976  | 4133.178419 | 4631.959806 |             |
| 4684.110183     |              |             |             |             |
| JARID2-AS1      | JARID2-AS1   | 1.041678189 | 3.521344766 | 0           |
| 1.961520177     |              |             |             |             |
| KCNQ5-IT1       | KCNQ5-IT1    | 8.33342551  | 9.683698106 |             |
| 10.03554123     | 11.76912106  |             |             |             |
| FAM223A FAM223A | 1.041678189  | 0.880336191 | 0           | 0           |
| LOC102724484    | LOC102724484 | 1.041678189 | 0           | 0           |
| SEMA6A-AS1      | SEMA6A-AS1   | 15.62517283 | 17.60672383 |             |
| 22.30120273     | 33.34584301  |             |             |             |
| LOC102723885    | LOC102723885 | 3627.123453 | 3543.353171 |             |
| 2232.350393     | 2900.107582  |             |             |             |
| FER1L5 FER1L5   | 2.083356377  | 0           | 7.805420954 | 1.961520177 |
| ELFN1-AS1       | ELFN1-AS1    | 12.50013826 | 5.282017149 |             |
| 14.49578177     | 14.71140133  |             |             |             |
| FNDC9 FNDC9     | 21.87524196  | 22.88874098 | 26.76144327 |             |
| 87.28764789     |              |             |             |             |
| C14orf64        | C14orf64     | 278.1280764 | 331.8867442 |             |
| 605.477654      | 617.8788559  |             |             |             |
| LINC01341       | LINC01341    | 0           | 0.880336191 | 0           |
| 0.980760089     |              |             |             |             |
| EXPH5 EXPH5     | 59.37565676  | 67.78588674 | 468.3252572 |             |

|              |              |             |             |             |             |
|--------------|--------------|-------------|-------------|-------------|-------------|
| 254.9976231  |              |             |             |             |             |
| LOC143666    | LOC143666    | 0           | 6.16235334  | 20.07108245 |             |
|              | 8.826840798  |             |             |             |             |
| LOC101927181 | LOC101927181 | 35.41705842 | 31.69210289 |             |             |
| 52.4078264   | 18.63444168  |             |             |             |             |
| CYP4F29P     | CYP4F29P     | 0           | 30.8117667  | 0           |             |
| 2.942280266  |              |             |             |             |             |
| LINC00866    | LINC00866    | 0           | 0.880336191 | 0           |             |
| 1.961520177  |              |             |             |             |             |
| SFN          | SFN          | 4.166712755 | 4.401680957 | 0           | 4.903800443 |
| IRF9         | IRF9         | 8331.342153 | 5349.803035 | 18272.49045 |             |
| 9499.642219  |              |             |             |             |             |
| MIR7110      | MIR7110      | 7.291747321 | 14.08537906 | 10.03554123 |             |
| 14.71140133  |              |             |             |             |             |
| CNTNAP3      | CNTNAP3      | 1.041678189 | 0           | 0           |             |
| LOC101448202 | LOC101448202 | 1.041678189 | 0           | 0           | 0           |
| FAM120C      | FAM120C      | 138.5431991 | 148.7768164 | 188.445163  |             |
| 131.4218519  |              |             |             |             |             |
| TNFSF9       | TNFSF9       | 763.5501123 | 335.4080889 | 381.3505666 |             |
| 420.746078   |              |             |             |             |             |
| LOC101928794 | LOC101928794 | 15.62517283 | 9.683698106 |             |             |
| 15.61084191  | 5.884560532  |             |             |             |             |
| LOC101928068 | LOC101928068 | 16.66685102 | 4.401680957 |             |             |
| 3.345180409  | 14.71140133  |             |             |             |             |
| LOC388813    | LOC388813    | 6.250069132 | 1.760672383 |             |             |
| 41.25722504  | 6.865320621  |             |             |             |             |
| KIAA1161     | KIAA1161     | 215.6273851 | 269.3828746 |             |             |
| 191.7903434  | 281.4781454  |             |             |             |             |
| PNMA6A       | PNMA6A       | 1.041678189 | 0           | 2.230120273 | 0           |
| LOC100130691 | LOC100130691 | 70.83411683 | 160.2211868 |             |             |
| 73.59396899  | 140.2486927  |             |             |             |             |
| NOP16        | NOP16        | 8827.180971 | 4144.622789 | 7674.958918 |             |
| 6728.014208  |              |             |             |             |             |
| RHOD         | RHOD         | 14.58349464 | 3.521344766 | 26.76144327 |             |
| 54.92256497  |              |             |             |             |             |
| LOC100506551 | LOC100506551 | 77.08418596 | 121.4863944 |             |             |
| 97.01023186  | 134.3641321  |             |             |             |             |
| LOC100132529 | LOC100132529 | 1.041678189 | 1.760672383 |             |             |
| 20.07108245  | 5.884560532  |             |             |             |             |
| LINC01301    | LINC01301    | 11.45846008 | 1.760672383 |             |             |
| 2.230120273  | 7.846080709  |             |             |             |             |
| LINC00869    | LINC00869    | 58.33397857 | 44.89714576 |             |             |
| 314.4469584  | 164.7676949  |             |             |             |             |
| BRWD1-IT2    | BRWD1-IT2    | 22.91692015 | 20.2477324  |             |             |
| 14.49578177  | 16.67292151  |             |             |             |             |
| FCGBP        | FCGBP        | 5.208390943 | 18.48706002 | 115.9662542 |             |
| 44.13420399  |              |             |             |             |             |
| PRAMEF4      | PRAMEF4      | 2.083356377 | 0           | 0           | 0           |
| AGAP4        | AGAP4        | 114.5846008 | 123.2470668 | 122.656615  |             |
| 120.6334909  |              |             |             |             |             |

|              |              |             |             |             |
|--------------|--------------|-------------|-------------|-------------|
| C5orf34      | C5orf34      | 491.6721051 | 582.7825587 | 735.9396899 |
| 775.7812301  |              |             |             |             |
| GOLGA6L17P   | GOLGA6L17P   | 0           | 3.521344766 | 0           |
| 4.903800443  |              |             |             |             |
| CEP19        | CEP19        | 701.049421  | 636.4830664 | 801.728238  |
| 615.9173357  |              |             |             |             |
| FAM21A       | FAM21A       | 2943.782561 | 2040.619292 | 3316.188845 |
| 3337.526582  |              |             |             |             |
| LOC100132062 | LOC100132062 | 0           | 2.641008574 | 0           |
| 0.980760089  |              |             |             |             |
| GLUD1P7      | GLUD1P7      | 0           | 0           | 6.690360818 |
| 0            |              |             |             | 0           |
| LOC103091866 | LOC103091866 | 209.6313056 | 126.5180514 | 35.41705842 |
| 209.6313056  |              |             |             | 42.25613719 |
| LPGAT1       | LPGAT1       | 1960.438351 | 2458.778983 | 1508.676364 |
| 2155.710675  |              |             |             |             |
| SNORA4       | SNORA4       | 90.62600242 | 58.10218863 | 147.187938  |
| 123.5757712  |              |             |             |             |
| SNORA63      | SNORA63      | 95.83439336 | 66.02521436 | 173.9493813 |
| 137.3064124  |              |             |             |             |
| SNORA52      | SNORA52      | 19.79188559 | 12.32470668 | 20.07108245 |
| 24.51900222  |              |             |             |             |
| SNORA7A      | SNORA7A      | 59.37565676 | 47.53815434 | 81.39938995 |
| 73.55700665  |              |             |             |             |
| SNORA72      | SNORA72      | 1.041678189 | 1.760672383 | 8.92048109  |
| 1.961520177  |              |             |             |             |
| TOP1P1       | TOP1P1       | 15.62517283 | 16.72638764 | 30.10662368 |
| 13.73064124  |              |             |             |             |
| CXCR2P1      | CXCR2P1      | 15.62517283 | 14.96571525 | 17.84096218 |
| 34.3266031   |              |             |             |             |
| FM06P        | FM06P        | 0           | 0           | 0.980760089 |
| 0            |              |             |             | 0           |
| SNORD60      | SNORD60      | 3.125034566 | 2.641008574 | 5.575300681 |
| 5.884560532  |              |             |             |             |
| PTTG3P       | PTTG3P       | 0           | 0.880336191 | 0           |
| 0            |              |             |             | 1.961520177 |
| HYALP1       | HYALP1       | 2.083356377 | 1.760672383 | 0           |
| 0            |              |             |             | 0.980760089 |
| BRD7P3       | BRD7P3       | 27.08363291 | 44.89714576 | 16.72590204 |
| 8.826840798  |              |             |             |             |
| HNRNPA3P1    | HNRNPA3P1    | 0           | 1.760672383 | 0           |
| 0.980760089  |              |             |             |             |
| INE2         | INE2         | 31.25034566 | 36.09378385 | 70.24878858 |
| 27.46128248  |              |             |             |             |
| SNORD53      | SNORD53      | 0           | 0.880336191 | 3.345180409 |
| 0            |              |             |             | 1.961520177 |
| SNORD59A     | SNORD59A     | 60.21324736 | 87.28764789 | 76.04250777 |
| 60.21324736  |              |             |             | 29.05109432 |
| SNORD45A     | SNORD45A     | 32.33674395 | 38.24964346 | 32.29202385 |
| 32.33674395  |              |             |             | 27.29042193 |
| SNORD45B     | SNORD45B     | 70.24878858 | 45.11496408 | 34.37538023 |
| 70.24878858  |              |             |             | 29.93143051 |
| SNORD47      | SNORD47      | 219.7940978 | 161.9818592 | 233.0475685 |
| 241.2669818  |              |             |             |             |
| SNORD48      | SNORD48      | 1.041678189 | 0           | 0           |
| 0            |              |             |             | 0           |

|                 |              |             |             |             |
|-----------------|--------------|-------------|-------------|-------------|
| SNORD49A        | SNORD49A     | 59.37565676 | 51.93983529 |             |
| 54.63794668     | 56.88408514  |             |             |             |
| LOC100506730    | LOC100506730 | 20.83356377 | 27.29042193 |             |
| 17.84096218     | 15.69216142  |             |             |             |
| LINC01006       | LINC01006    | 1.041678189 | 3.521344766 | 0           |
| 4.903800443     |              |             |             |             |
| EDNRB-AS1       | EDNRB-AS1    | 1.041678189 | 0           | 0           |
| 3.923040355     |              |             |             |             |
| SH3BGRL2        | SH3BGRL2     | 6.250069132 | 23.76907717 |             |
| 147.187938      | 21.57672195  |             |             |             |
| LENG8 LENG8     | 263.5445817  | 1209.581927 | 440.4487538 |             |
| 652.205459      |              |             |             |             |
| MOXD1 MOXD1     | 8.33342551   | 14.96571525 | 14.49578177 |             |
| 6.865320621     |              |             |             |             |
| KIAA2018        | KIAA2018     | 407.2961718 | 794.9435809 |             |
| 711.4083669     | 619.840376   |             |             |             |
| C1orf167        | C1orf167     | 55.208944   | 164.6228678 |             |
| 170.6042008     | 114.7489304  |             |             |             |
| PPP1R15B        | PPP1R15B     | 3096.909255 | 4028.418412 |             |
| 5031.151335     | 3660.196651  |             |             |             |
| RMDN2 RMDN2     | 161.4601192  | 106.5206792 | 370.1999652 |             |
| 155.9408541     |              |             |             |             |
| RNF222 RNF222   | 4.166712755  | 2.641008574 | 11.15060136 | 0           |
| BHLHE40-AS1     | BHLHE40-AS1  | 275.0030418 | 140.8537906 |             |
| 161.6837198     | 110.82589    |             |             |             |
| MIR3652 MIR3652 | 2798.989293  | 2666.538324 | 2059.516072 |             |
| 2157.672195     |              |             |             |             |
| PPP1R2 PPP1R2   | 9825.108676  | 6503.923782 | 11345.73689 |             |
| 8330.576193     |              |             |             |             |
| HSD17B11        | HSD17B11     | 1288.555919 | 1130.35167  |             |
| 1349.222765     | 897.3954811  |             |             |             |
| DDX60L DDX60L   | 2229.191324  | 1548.511361 | 4861.662194 |             |
| 2260.652004     |              |             |             |             |
| SOWAHA SOWAHA   | 10.41678189  | 1.760672383 | 13.38072164 | 0           |
| HIVEP1 HIVEP1   | 766.6751469  | 1778.279107 | 1478.569741 |             |
| 1409.352247     |              |             |             |             |
| FREM2 FREM2     | 4.166712755  | 0           | 5.575300681 | 1.961520177 |
| SLC5A3 SLC5A3   | 2376.067948  | 3539.831826 | 2516.690728 |             |
| 2455.823262     |              |             |             |             |
| FOCAD FOCAD     | 4319.839449  | 4591.833575 | 3058.609954 |             |
| 3916.175034     |              |             |             |             |
| PNPLA7 PNPLA7   | 29.16698928  | 18.48706002 | 71.36384872 |             |
| 98.07600887     |              |             |             |             |
| PPCDC PPCDC     | 2206.274404  | 2137.456273 | 977.9077395 |             |
| 1049.413295     |              |             |             |             |
| CCDC53 CCDC53   | 3115.659462  | 3428.909466 | 2718.516612 |             |
| 2724.551526     |              |             |             |             |
| KIAA2026        | KIAA2026     | 611.4650968 | 910.2676219 |             |
| 946.6860557     | 929.7605641  |             |             |             |
| IP09-AS1        | IP09-AS1     | 544.7976927 | 443.6894405 |             |

|                 |              |             |             |             |             |
|-----------------|--------------|-------------|-------------|-------------|-------------|
| 362.3945443     | 449.1881206  |             |             |             |             |
| DOCK9-AS1       | DOCK9-AS1    | 0           | 0           | 0           | 1.961520177 |
| ZNF180 ZNF180   | 837.5092637  | 741.2430732 |             | 952.2613564 |             |
| 755.1852683     |              |             |             |             |             |
| ADRA2B ADRA2B   | 0            | 4.401680957 | 15.61084191 | 2.942280266 |             |
| SVILP1 SVILP1   | 495.8388178  | 419.0400271 |             | 359.0493639 |             |
| 352.0928718     |              |             |             |             |             |
| GRIP2 GRIP2     | 26.04195472  | 54.58084387 |             | 40.14216491 |             |
| 22.55748204     |              |             |             |             |             |
| VNN3 VNN3       | 0            | 0           | 10.03554123 | 0.980760089 |             |
| CNNM1 CNNM1     | 1.041678189  | 14.96571525 |             | 54.63794668 |             |
| 102.9798093     |              |             |             |             |             |
| OTUD7B OTUD7B   | 197.9188559  | 351.2541404 |             | 332.2879206 |             |
| 333.4584301     |              |             |             |             |             |
| CD109 CD109     | 3086.492473  | 2923.596492 |             | 1079.378212 |             |
| 1058.240136     |              |             |             |             |             |
| TMEM242 TMEM242 | 1984.396949  | 1517.699594 |             | 1549.933589 |             |
| 1347.564362     |              |             |             |             |             |
| AOC4P AOC4P     | 0            | 0           | 0           | 1.961520177 |             |
| DLEU2L DLEU2L   | 6.250069132  | 16.72638764 |             | 2.230120273 |             |
| 4.903800443     |              |             |             |             |             |
| LYPLA2 LYPLA2   | 7551.12519   | 5774.12508  |             | 5569.725381 |             |
| 6920.243186     |              |             |             |             |             |
| LINC01353       | LINC01353    | 44.79216211 |             | 36.09378385 |             |
| 18.95602232     | 36.28812328  |             |             |             |             |
| LOC102723373    | LOC102723373 | 3.125034566 |             | 2.641008574 |             |
| 64.6734879      | 22.55748204  |             |             |             |             |
| FER1L4 FER1L4   | 7.291747321  | 5.282017149 |             | 11.15060136 |             |
| 18.63444168     |              |             |             |             |             |
| DLGAP4 DLGAP4   | 1428.140797  | 1208.701591 |             | 1383.789629 |             |
| 1437.79429      |              |             |             |             |             |
| CASC21 CASC21   | 0            | 0           | 12.2656615  | 1.961520177 |             |
| LOC101927560    | LOC101927560 | 3.125034566 |             | 7.042689532 |             |
| 14.49578177     | 17.6536816   |             |             |             |             |
| LOC102724467    | LOC102724467 | 20.83356377 |             | 22.00840479 |             |
| 26.76144327     | 19.61520177  |             |             |             |             |
| LOC101927587    | LOC101927587 | 1.041678189 |             | 12.32470668 |             |
| 15.61084191     | 9.807600887  |             |             |             |             |
| SRRM3 SRRM3     | 0            | 4.401680957 | 0           | 0           |             |
| PERP PERP       | 2318.775648  | 2184.114091 |             | 1441.772756 |             |
| 1978.193099     |              |             |             |             |             |
| PLEKHA2 PLEKHA2 | 507.2972779  | 990.3782154 |             | 525.1933242 |             |
| 611.0135352     |              |             |             |             |             |
| MIR503 MIR503   | 0            | 2.641008574 | 0           | 0           |             |
| MIR499A MIR499A | 0            | 0.880336191 | 0           | 0           |             |
| MUC3A MUC3A     | 0            | 1.760672383 | 3.345180409 | 0           |             |
| SPDYE6 SPDYE6   | 45.8338403   | 20.2477324  |             | 64.6734879  |             |
| 15.69216142     |              |             |             |             |             |
| LOC101928414    | LOC101928414 | 3.125034566 |             | 5.282017149 |             |
| 14.49578177     | 6.865320621  |             |             |             |             |

|              |              |             |             |             |
|--------------|--------------|-------------|-------------|-------------|
| LOC101928388 | LOC101928388 | 3.125034566 | 12.32470668 |             |
| 5.575300681  | 2.942280266  |             |             |             |
| LINC01479    | LINC01479    | 0           | 0.880336191 | 0           |
| 4.903800443  |              |             |             |             |
| LOC101929655 | LOC101929655 | 9.375103698 | 21.12806859 |             |
| 46.83252572  | 40.21116364  |             |             |             |
| LINC01359    | LINC01359    | 1.041678189 | 1.760672383 |             |
| 5.575300681  | 8.826840798  |             |             |             |
| LOC101929679 | LOC101929679 | 0           | 0           | 12.2656615  |
| 4.903800443  |              |             |             |             |
| CA2          | CA2          | 68.75076045 | 667.2948331 | 268.7294928 |
| 518.8220869  |              |             |             |             |
| PAPOLA       | PAPOLA       | 6869.867654 | 13656.65534 | 6839.778876 |
| 7879.426552  |              |             |             |             |
| CASC19       | CASC19       | 2.083356377 | 0.880336191 | 0           |
| LOC101926895 | LOC101926895 | 137.5015209 | 248.254806  | 0.980760089 |
| 216.3216664  | 154.960094   |             |             |             |
| LOC101929765 | LOC101929765 | 5.208390943 | 3.521344766 | 0           |
| 3.923040355  |              |             |             |             |
| LOC102724034 | LOC102724034 | 0           | 0           | 3.345180409 |
| LOC54944     | LOC54944     | 20.83356377 | 61.6235334  | 0           |
| 23.41626286  | 58.84560532  |             |             |             |
| UPK3B        | UPK3B        | 3.125034566 | 0.880336191 | 0           |
| AOAH-IT1     | AOAH-IT1     | 4.166712755 | 4.401680957 | 2.942280266 |
| 4.460240545  | 7.846080709  |             |             |             |
| LINC00400    | LINC00400    | 0           | 0.880336191 | 0           |
| 1.961520177  |              |             |             |             |
| LOC388436    | LOC388436    | 1.041678189 | 0           | 2.230120273 |
| 0            |              |             |             |             |
| TADA2A       | TADA2A       | 1937.521431 | 1591.647834 | 1392.71011  |
| 1371.102604  |              |             |             |             |
| SNRPD1       | SNRPD1       | 13017.85232 | 10826.37448 | 9103.350952 |
| 11228.72226  |              |             |             |             |
| SH3GL2       | SH3GL2       | 0           | 0           | 2.942280266 |
| RXRA         | RXRA         | 165.626832  | 28.17075813 | 185.0999826 |
| 121.614251   |              |             |             |             |
| SLC25A30-AS1 | SLC25A30-AS1 | 8.33342551  | 11.44437049 |             |
| 8.92048109   | 3.923040355  |             |             |             |
| LM07-AS1     | LM07-AS1     | 1175.012997 | 615.3549978 |             |
| 740.3999305  | 684.5705419  |             |             |             |
| LOC101927248 | LOC101927248 | 0           | 0           | 0           |
| ZNF316       | ZNF316       | 363.5456879 | 988.617543  | 0.980760089 |
| 721.8394253  |              |             |             | 807.3035387 |
| LOC400867    | LOC400867    | 1.041678189 | 0           | 0           |
| PKD1L3       | PKD1L3       | 47.91719668 | 19.36739621 | 0           |
| 12.74988115  |              |             |             | 61.32830749 |
| LINC01314    | LINC01314    | 0           | 0.880336191 | 23.41626286 |
| 4.903800443  |              |             |             |             |
| ZNF213-AS1   | ZNF213-AS1   | 226.0441669 | 264.9811936 |             |
| 227.4722678  | 245.1900222  |             |             |             |

|              |              |             |             |             |             |
|--------------|--------------|-------------|-------------|-------------|-------------|
| PLAA         | PLAA         | 6482.363368 | 4873.541156 | 4900.689299 |             |
| 4213.345341  |              |             |             |             |             |
| SLC35F1      | SLC35F1      | 2.083356377 | 1.760672383 | 0           | 2.942280266 |
| C2orf68      | C2orf68      | 475.005254  | 1164.684781 | 921.0396726 |             |
| 734.5893064  |              |             |             |             |             |
| HNRNPCL1     | HNRNPCL1     |             | 2.083356377 | 0           | 0           |
| 0.980760089  |              |             |             |             |             |
| ANKRD20A2    | ANKRD20A2    |             | 3.125034566 | 9.683698106 |             |
| 3.345180409  |              | 1.961520177 |             |             |             |
| C1QL3        | C1QL3        | 35.41705842 | 39.61512861 | 47.94758586 |             |
| 52.96104479  |              |             |             |             |             |
| SLC6A17      | SLC6A17      | 0           | 0           | 9.807600887 |             |
| IL17REL      | IL17REL      | 1.041678189 | 0           | 0           | 0           |
| CALHM1       | CALHM1       | 6.250069132 | 13.20504287 | 0           | 1.961520177 |
| LINC01053    | LINC01053    |             | 0           | 0           | 1.961520177 |
| LINC00412    | LINC00412    |             | 4.166712755 | 10.5640343  |             |
| 6.690360818  |              | 2.942280266 |             |             |             |
| LOC101929140 | LOC101929140 |             | 56.25062219 | 68.66622293 |             |
| 57.98312709  |              | 67.67244612 |             |             |             |
| LOC101929259 | LOC101929259 |             | 0           | 0           | 3.345180409 |
| 1.961520177  |              |             |             |             |             |
| LOC101927437 | LOC101927437 |             | 36.4587366  | 33.45277527 |             |
| 65.78854804  |              | 107.8836098 |             |             |             |
| ZNF710       | ZNF710       | 147.9183028 | 417.2793547 | 273.1897334 |             |
| 223.6133002  |              |             |             |             |             |
| LINC00683    | LINC00683    |             | 0           | 0           | 3.345180409 |
| LOC100507006 | LOC100507006 |             | 62.50069132 | 84.51227438 | 0           |
| 57.98312709  |              | 74.53776674 |             |             |             |
| ADPRH        | ADPRH        | 1168.762928 | 700.7476084 | 479.4758586 |             |
| 947.4142457  |              |             |             |             |             |
| NMU          | NMU          | 28.12531109 | 41.375801   | 63.55842777 |             |
| 16.67292151  |              |             |             |             |             |
| ENOPH1       | ENOPH1       | 5244.84968  | 4599.7566   | 5333.332632 |             |
| 5705.081436  |              |             |             |             |             |
| ING2         | ING2         | 534.3809108 | 612.7139892 | 502.8921215 |             |
| 648.2824186  |              |             |             |             |             |
| ZNF76        | ZNF76        | 2355.234385 | 2297.67746  | 2670.569026 |             |
| 3446.390952  |              |             |             |             |             |
| MAP3K4       | MAP3K4       | 1648.976573 | 2368.984691 | 2098.543176 |             |
| 2380.304735  |              |             |             |             |             |
| RPL34-AS1    | RPL34-AS1    |             | 75.00082959 | 22.88874098 |             |
| 52.4078264   |              | 40.21116364 |             |             |             |
| PANO         | PANO         | 26.04195472 | 36.09378385 | 13.38072164 |             |
| 24.51900222  |              |             |             |             |             |
| TBC1D19      | TBC1D19      | 406.2544936 | 261.4598489 | 353.4740632 |             |
| 369.7465534  |              |             |             |             |             |
| MSRA         | MSRA         | 64.5840477  | 188.391945  | 76.9391494  |             |
| 75.51852683  |              |             |             |             |             |
| CACNA1C-AS2  | CACNA1C-AS2  |             | 6.250069132 | 7.042689532 |             |
| 62.44336763  |              | 53.94180488 |             |             |             |

|                 |              |               |               |   |
|-----------------|--------------|---------------|---------------|---|
| LOC101928100    | LOC101928100 | 53.12558762   | 12.32470668   |   |
| 444.9089944     | 48.05724434  |               |               |   |
| LOC101927267    | LOC101927267 | 623.965235    | 487.7062501   |   |
| 198.4807043     | 234.4016612  |               |               |   |
| OR7E47P OR7E47P | 2.083356377  | 0 0           | 0             |   |
| NCK1 NCK1       | 2413.568363  | 1971.072733   | 2583.594336   |   |
| 1979.173859     |              |               |               |   |
| ZNF330 ZNF330   | 3459.413265  | 2794.187072   | 3623.945443   |   |
| 3449.333232     |              |               |               |   |
| SSR1 SSR1       | 18180.40943  | 15311.68738   | 13934.90652   |   |
| 12488.99897     |              |               |               |   |
| SRF SRF         | 2144.815391  | 2685.90572    | 1631.332979   |   |
| 2001.731341     |              |               |               |   |
| LOC101929162    | LOC101929162 | 483.3386796   | 379.4248985   |   |
| 582.0613911     | 482.5339636  |               |               |   |
| TESC-AS1        | TESC-AS1     | 8.33342551    | 12.32470668   |   |
| 15.61084191     | 10.78836098  |               |               |   |
| STAC STAC       | 14.58349464  | 7.042689532   | 0 9.807600887 |   |
| HCLS1 HCLS1     | 30349.29403  | 29235.96492   | 20398.91013   |   |
| 24166.90934     |              |               |               |   |
| MAN2B2 MAN2B2   | 1578.142456  | 2895.425734   | 1199.804707   |   |
| 2261.632764     |              |               |               |   |
| ADAMTS1 ADAMTS1 | 137.5015209  | 16.72638764   | 22.30120273   |   |
| 5.884560532     |              |               |               |   |
| NBPF10 NBPF10   | 453.1300121  | 432.24507     | 556.415008    |   |
| 379.5541543     |              |               |               |   |
| GSTA7P GSTA7P   | 0 0          | 2.230120273   | 0             |   |
| LINCR-0001      | LINCR-0001   | 1.041678189   | 0 0 0         |   |
| LOC101927964    | LOC101927964 | 0 0           | 1.115060136   |   |
| 4.903800443     |              |               |               |   |
| LOC101928150    | LOC101928150 | 15.62517283   | 9.683698106   |   |
| 65.78854804     | 22.55748204  |               |               |   |
| LOC101928272    | LOC101928272 | 0 0.880336191 | 0             |   |
| 0.980760089     |              |               |               |   |
| SLC16A12-AS1    | SLC16A12-AS1 | 2.083356377   | 0 0 0         |   |
| LINC01475       | LINC01475    | 0 0           | 1.115060136   | 0 |
| LOC101927472    | LOC101927472 | 7.291747321   | 12.32470668   |   |
| 11.15060136     | 10.78836098  |               |               |   |
| LOC101927692    | LOC101927692 | 3.125034566   | 14.08537906   |   |
| 2.230120273     | 4.903800443  |               |               |   |
| FAM53B-AS1      | FAM53B-AS1   | 27.08363291   | 25.52974955   |   |
| 24.531323       | 11.76912106  |               |               |   |
| EDRF1-AS1       | EDRF1-AS1    | 190.6271085   | 203.3576602   |   |
| 150.5331184     | 208.9018989  |               |               |   |
| LINC01163       | LINC01163    | 5.208390943   | 14.96571525   | 0 |
| 13.73064124     |              |               |               |   |
| LINC01516       | LINC01516    | 5.208390943   | 0 0 0         |   |
| LOC101929279    | LOC101929279 | 3.125034566   | 0 0 0         |   |
| LOC101929431    | LOC101929431 | 31.25034566   | 58.10218863   |   |
| 13.38072164     | 21.57672195  |               |               |   |



|                 |              |             |             |             |             |
|-----------------|--------------|-------------|-------------|-------------|-------------|
| LINC01518       | LINC01518    | 0           | 0           | 1.115060136 | 0           |
| LOC101928994    | LOC101928994 | 1.041678189 | 0           | 0           | 0           |
| ZNF503 ZNF503   | 0            | 0.880336191 | 7.805420954 | 0.980760089 |             |
| LOC101929574    | LOC101929574 | 78.12586415 |             | 81.8712658  |             |
| 83.62951022     | 71.59548647  |             |             |             |             |
| LOC102723703    | LOC102723703 | 38.54209298 |             | 17.60672383 |             |
| 31.22168382     | 23.53824213  |             |             |             |             |
| DYRK1B DYRK1B   | 281.2531109  | 270.2632108 |             | 389.1559876 |             |
| 247.1515423     |              |             |             |             |             |
| MCCC1 MCCC1     | 3414.621103  | 2926.2375   |             | 2948.219    |             |
| 2974.645349     |              |             |             |             |             |
| LOC101926941    | LOC101926941 | 0           | 0           | 0           | 1.961520177 |
| CEMIP CEMIP     | 10.41678189  | 23.76907717 |             | 43.48734531 |             |
| 24.51900222     |              |             |             |             |             |
| LOC102724009    | LOC102724009 | 130.2097736 |             | 156.6998421 |             |
| 158.3385393     | 160.8446545  |             |             |             |             |
| C8orf59 C8orf59 | 2281.275233  | 2485.189068 |             | 2755.313597 |             |
| 2613.725636     |              |             |             |             |             |
| LOC100507316    | LOC100507316 | 126.0430608 |             | 113.5633687 |             |
| 142.7276974     | 99.05676896  |             |             |             |             |
| PGM5P3-AS1      | PGM5P3-AS1   | 0           | 0           | 2.230120273 | 0           |
| PGM5P4-AS1      | PGM5P4-AS1   | 0           | 0           | 2.230120273 | 0           |
| LOC100507651    | LOC100507651 | 1.041678189 | 0           | 0           | 0           |
| C9orf41-AS1     | C9orf41-AS1  | 458.338403  |             | 386.467588  |             |
| 399.1915288     | 420.746078   |             |             |             |             |
| HOMEZ HOMEZ     | 483.3386796  | 643.5257559 |             | 789.4625765 |             |
| 694.3781428     |              |             |             |             |             |
| LOC414300       | LOC414300    | 12.50013826 |             | 3.521344766 |             |
| 8.92048109      | 6.865320621  |             |             |             |             |
| LOC93432        | LOC93432     | 0           | 0           | 2.230120273 |             |
| 0.980760089     |              |             |             |             |             |
| LINC01189       | LINC01189    | 0           | 0           | 1.115060136 | 0           |
| LINC01507       | LINC01507    | 0           | 2.641008574 | 0           | 0           |
| LOC101927954    | LOC101927954 | 1381.265278 |             | 1098.659567 |             |
| 1495.295643     | 1371.102604  |             |             |             |             |
| PCAT7 PCAT7     | 2.083356377  | 0           | 0           | 1.961520177 |             |
| RFX3-AS1        | RFX3-AS1     | 27.08363291 |             | 54.58084387 |             |
| 8.92048109      | 24.51900222  |             |             |             |             |
| CDC37L1-AS1     | CDC37L1-AS1  | 41.66712755 |             | 28.17075813 |             |
| 66.90360818     | 27.46128248  |             |             |             |             |
| FOCAD-AS1       | FOCAD-AS1    | 3.125034566 |             | 4.401680957 |             |
| 11.15060136     | 3.923040355  |             |             |             |             |
| LOC101929563    | LOC101929563 | 0           | 0           | 1.115060136 |             |
| 1.961520177     |              |             |             |             |             |
| LINC01241       | LINC01241    | 2.083356377 | 0           | 0           | 0           |
| SMC2-AS1        | SMC2-AS1     | 3.125034566 | 0.880336191 |             |             |
| 2.230120273     | 0            |             |             |             |             |
| LOC101928525    | LOC101928525 | 2832.322995 |             | 1706.091539 |             |
| 2070.666673     | 2001.731341  |             |             |             |             |
| MIR4674HG       | MIR4674HG    | 0           | 4.401680957 | 0           |             |

|              |              |             |             |             |             |
|--------------|--------------|-------------|-------------|-------------|-------------|
| 2.942280266  |              |             |             |             |             |
| LOC100507291 | LOC100507291 | 27.08363291 |             | 29.05109432 |             |
| 61.32830749  | 59.82636541  |             |             |             |             |
| LOC100507639 | LOC100507639 | 0           | 0           | 6.690360818 | 0           |
| LOC100996286 | LOC100996286 | 329.1703076 |             | 881.2165276 |             |
| 185.0999826  | 447.2266004  |             |             |             |             |
| LOC100507406 | LOC100507406 | 69.79243864 |             | 38.73479242 |             |
| 22.30120273  | 18.63444168  |             |             |             |             |
| IFT74-AS1    | IFT74-AS1    | 0           | 1.760672383 |             | 2.230120273 |
| 0            |              |             |             |             |             |
| LOC102723709 | LOC102723709 | 0           | 0           | 1.115060136 | 0           |
| LOC100996583 | LOC100996583 | 48.95887487 |             | 76.58924866 |             |
| 103.7005927  | 128.4795716  |             |             |             |             |
| FOX D3-AS1   | FOX D3-AS1   | 1.041678189 |             | 1.760672383 | 0           |
| 0.980760089  |              |             |             |             |             |
| RNVU1-8      | RNVU1-8      | 1.041678189 | 0.880336191 | 0           | 1.961520177 |
| LOC101060498 | LOC101060498 | 15.62517283 |             | 13.20504287 |             |
| 24.531323    | 30.40356275  |             |             |             |             |
| LOC100996694 | LOC100996694 | 0           | 0           | 0           | 0.980760089 |
| LOC100996348 | LOC100996348 | 0           | 1.760672383 |             | 1.115060136 |
| 4.903800443  |              |             |             |             |             |
| MIR3663HG    | MIR3663HG    | 0           | 1.760672383 | 0           | 0           |
| LINC01465    | LINC01465    | 31.25034566 |             | 29.05109432 |             |
| 24.531323    | 25.49976231  |             |             |             |             |
| ITIH4-AS1    | ITIH4-AS1    | 6.250069132 |             | 10.5640343  |             |
| 8.92048109   | 15.69216142  |             |             |             |             |
| MYLK-AS1     | MYLK-AS1     | 52.08390943 |             | 55.46118006 |             |
| 75.82408927  | 64.73016585  |             |             |             |             |
| LOC440982    | LOC440982    | 0           | 0           | 1.115060136 | 0           |
| LMLN-AS1     | LMLN-AS1     | 65.62572589 |             | 29.05109432 |             |
| 92.54999131  | 83.36460754  |             |             |             |             |
| LINC01410    | LINC01410    | 9.375103698 |             | 6.16235334  |             |
| 10.03554123  | 0.980760089  |             |             |             |             |
| ZNF385D-AS1  | ZNF385D-AS1  | 0           | 0.880336191 | 0           | 0           |
| STT3B        | STT3B        | 24880.48354 | 25145.04264 | 18145.3736  |             |
| 17342.78065  |              |             |             |             |             |
| GLYCTK-AS1   | GLYCTK-AS1   | 13.54181645 |             | 14.08537906 | 0           |
| 6.865320621  |              |             |             |             |             |
| PLCXD2-AS1   | PLCXD2-AS1   | 56.25062219 |             | 44.01680957 |             |
| 26.76144327  | 27.46128248  |             |             |             |             |
| ZBTB20       | ZBTB20       | 155.2100501 | 207.7593412 | 1055.961949 |             |
| 967.0294474  |              |             |             |             |             |
| LOC101929754 | LOC101929754 | 1.041678189 |             | 0           | 0           |
| ZBTB20-AS4   | ZBTB20-AS4   | 1.041678189 |             | 0.880336191 |             |
| 5.575300681  | 3.923040355  |             |             |             |             |
| B4GALT4-AS1  | B4GALT4-AS1  | 142.7099119 |             | 95.07630868 |             |
| 183.9849225  | 194.1904976  |             |             |             |             |
| ATP13A4-AS1  | ATP13A4-AS1  | 4.166712755 |             | 1.760672383 | 0           |
| 0            |              |             |             |             |             |
| TM4SF19-AS1  | TM4SF19-AS1  | 7.291747321 |             | 7.042689532 |             |

|                 |                 |             |             |             |             |
|-----------------|-----------------|-------------|-------------|-------------|-------------|
| 12.2656615      | 12.74988115     |             |             |             |             |
| HDAC11-AS1      | HDAC11-AS1      | 8.33342551  | 5.282017149 |             |             |
| 11.15060136     | 7.846080709     |             |             |             |             |
| LOC101927854    | LOC101927854    | 1.041678189 | 0           | 0           |             |
| 2.942280266     |                 |             |             |             |             |
| ARHGAP31-AS1    | ARHGAP31-AS1    | 4.166712755 | 0           | 5.575300681 |             |
|                 | 7.846080709     |             |             |             |             |
| ERICH6-AS1      | ERICH6-AS1      | 66.66740408 | 75.70891246 |             |             |
| 83.62951022     | 99.05676896     |             |             |             |             |
| IQCJ-SCHIP1-AS1 | IQCJ-SCHIP1-AS1 | 0           | 0.880336191 | 0           | 0           |
| NAALADL2-AS2    | NAALADL2-AS2    | 0           | 0           | 0           | 3.923040355 |
| SPINK1 SPINK1   | 0 0             | 1.115060136 | 0           |             |             |
| LINC00824       | LINC00824       | 2.083356377 | 4.401680957 |             |             |
| 140.4975772     | 17.6536816      |             |             |             |             |
| LOC51145        | LOC51145        | 0           | 0.880336191 | 0           | 0           |
| C1orf95 C1orf95 | 0 1.760672383   | 3.345180409 | 0           |             |             |
| ZNF561-AS1      | ZNF561-AS1      | 193.7521431 | 132.0504287 |             |             |
| 325.5975598     | 140.2486927     |             |             |             |             |
| LOC284930       | LOC284930       | 2.083356377 | 0           | 0           |             |
| 0.980760089     |                 |             |             |             |             |
| KRBOX1-AS1      | KRBOX1-AS1      | 0           | 1.760672383 | 0           | 0           |
| ARRDC1-AS1      | ARRDC1-AS1      | 701.049421  | 757.9694608 |             |             |
| 810.6487191     | 814.0308736     |             |             |             |             |
| LOC285043       | LOC285043       | 0           | 1.760672383 | 0           |             |
| 2.942280266     |                 |             |             |             |             |
| LOC400997       | LOC400997       | 0           | 0           | 0           | 0.980760089 |
| LOC642757       | LOC642757       | 4.166712755 | 7.923025723 |             |             |
| 7.805420954     | 11.76912106     |             |             |             |             |
| LOC729083       | LOC729083       | 1.041678189 | 3.521344766 |             |             |
| 5.575300681     | 1.961520177     |             |             |             |             |
| H0XA-AS2        | H0XA-AS2        | 0           | 0           | 3.345180409 |             |
| 0.980760089     |                 |             |             |             |             |
| LOC403323       | LOC403323       | 23.95859834 | 27.29042193 |             |             |
| 24.531323       | 15.69216142     |             |             |             |             |
| LINC01296       | LINC01296       | 25.00027653 | 0           | 32.33674395 |             |
|                 | 2.942280266     |             |             |             |             |
| DOK5 DOK5       | 434.3798047     | 519.3983529 | 94.78011158 |             |             |
| 133.3833721     |                 |             |             |             |             |
| DUXAP8 DUXAP8   | 15.62517283     | 5.282017149 | 16.72590204 |             |             |
| 0.980760089     |                 |             |             |             |             |
| LINC00969       | LINC00969       | 337.5037331 | 333.6474166 |             |             |
| 287.6855152     | 350.1313517     |             |             |             |             |
| LOC439933       | LOC439933       | 161.4601192 | 155.8195059 |             |             |
| 252.0035908     | 251.0745827     |             |             |             |             |
| CYP51A1-AS1     | CYP51A1-AS1     | 38.54209298 | 54.58084387 |             |             |
| 36.7969845      | 27.46128248     |             |             |             |             |
| BICC1 BICC1     | 11.45846008     | 48.41849053 | 0           | 13.73064124 |             |
| LOC100049716    | LOC100049716    | 109.3762098 | 207.7593412 |             |             |
| 113.7361339     | 179.4790962     |             |             |             |             |
| TGFB3 TGFB3     | 14.58349464     | 46.65781815 | 3.345180409 |             |             |

|                 |             |  |               |               |
|-----------------|-------------|--|---------------|---------------|
| 30.40356275     |             |  |               |               |
| LOC730202       | LOC730202   |  | 65.62572589   | 88.91395534   |
| 14.49578177     | 46.09572417 |  |               |               |
| LOC728485       | LOC728485   |  | 39.58377117   | 28.17075813   |
| 30.10662368     | 65.71092594 |  |               |               |
| TSL TSL         | 1.041678189 |  | 6.16235334    | 0 4.903800443 |
| NINJ2 NINJ2     | 858.3428275 |  | 1072.249481   | 502.8921215   |
| 569.8216115     |             |  |               |               |
| MTMR12 MTMR12   | 3151.076521 |  | 3327.670804   | 2405.184714   |
| 3062.913757     |             |  |               |               |
| CLK2 CLK2       | 1158.346146 |  | 2166.507367   | 1323.576382   |
| 1614.331106     |             |  |               |               |
| MFSD7 MFSD7     | 30.20866747 |  | 32.57243908   | 46.83252572   |
| 49.03800443     |             |  |               |               |
| SDHA SDHA       | 24608.60553 |  | 19161.39754   | 19205.79579   |
| 18327.46378     |             |  |               |               |
| DAPK3 DAPK3     | 1509.391695 |  | 1823.176252   | 1088.298693   |
| 1296.564837     |             |  |               |               |
| HAS1 HAS1       | 0 0         |  | 18.95602232   | 7.846080709   |
| TMEM175 TMEM175 | 839.5926201 |  | 735.0807199   | 735.9396899   |
| 727.7239858     |             |  |               |               |
| MAEA MAEA       | 4612.55102  |  | 3816.25739    | 3788.974343   |
| 4294.748428     |             |  |               |               |
| HGFAC HGFAC     | 0 0         |  | 0 0.980760089 |               |
| LOC399491       | LOC399491   |  | 244.7943743   | 589.8252483   |
| 378.0053862     | 455.0726811 |  |               |               |
| PKD1P6 PKD1P6   | 166.6685102 |  | 382.9462433   | 252.0035908   |
| 310.9009481     |             |  |               |               |
| TMEM128 TMEM128 | 1731.26915  |  | 1441.990682   | 2299.254001   |
| 1774.195        |             |  |               |               |
| HTRA3 HTRA3     | 18.7502074  |  | 7.923025723   | 0 0.980760089 |
| ZNF131 ZNF131   | 1520.850156 |  | 1560.836067   | 1878.87633    |
| 1615.311866     |             |  |               |               |
| TRERF1 TRERF1   | 540.6309799 |  | 3939.504457   | 788.3475163   |
| 1993.88526      |             |  |               |               |
| FAM9B FAM9B     | 0 0         |  | 3.345180409   | 0.980760089   |
| TCEANC TCEANC   | 377.0875043 |  | 262.340185    | 879.7824475   |
| 449.1881206     |             |  |               |               |
| HNRNPR HNRNPR   | 24829.44131 |  | 21246.03364   | 16144.95571   |
| 19700.5279      |             |  |               |               |
| MAP3K6 MAP3K6   | 330.2119858 |  | 679.6195398   | 307.7565976   |
| 668.8783805     |             |  |               |               |
| LOC729867       | LOC729867   |  | 37.50041479   | 121.4863944   |
| 45.71746559     | 53.94180488 |  |               |               |
| CDCA3 CDCA3     | 4035.461303 |  | 3587.36998    | 1961.39078    |
| 2776.531811     |             |  |               |               |
| ZNF823 ZNF823   | 346.8788368 |  | 244.7334612   | 625.5487364   |
| 344.2467911     |             |  |               |               |
| SIN3B SIN3B     | 717.716272  |  | 868.8918209   | 605.477654    |
| 642.3978581     |             |  |               |               |

|             |             |             |             |             |            |
|-------------|-------------|-------------|-------------|-------------|------------|
| ZNF461      | ZNF461      | 277.0863982 | 210.4003498 | 556.415008  |            |
| 317.7662687 |             |             |             |             |            |
| ZNF480      | ZNF480      | 1488.558132 | 1342.512692 | 1563.314311 |            |
| 1265.180514 |             |             |             |             |            |
| SEL1L3      | SEL1L3      | 7094.870143 | 9550.767341 | 5293.190467 |            |
| 6944.762188 |             |             |             |             |            |
| SPATA18     | SPATA18     | 23.95859834 | 11.44437049 | 55.75300681 | 0          |
| SNX14       | SNX14       | 4340.673012 | 4357.664148 | 3258.205718 |            |
| 4051.519926 |             |             |             |             |            |
| MIER3       | MIER3       | 1875.02074  | 2413.881837 | 1964.73596  |            |
| 1838.925166 |             |             |             |             |            |
| EIF3K       | EIF3K       | 7464.6659   | 7166.816934 | 5971.14703  |            |
| 5467.737494 |             |             |             |             |            |
| ZNF570      | ZNF570      | 194.7938213 | 201.5969878 | 689.1071642 |            |
| 256.9591432 |             |             |             |             |            |
| TMEM53      | TMEM53      | 187.502074  | 240.3317803 | 206.2861252 |            |
| 226.5555805 |             |             |             |             |            |
| LMBR1L      | LMBR1L      | 1827.103543 | 2003.645172 | 2680.604568 |            |
| 2420.515899 |             |             |             |             |            |
| RASGEF1B    | RASGEF1B    |             | 51.04223125 | 110.0420239 |            |
| 908.7740111 | 412.8999973 |             |             |             |            |
| MRPL9       | MRPL9       | 6394.8624   | 4884.985526 | 5170.533852 |            |
| 4812.589755 |             |             |             |             |            |
| TSEN15      | TSEN15      | 5379.226166 | 5559.323049 | 4705.553775 |            |
| 5520.698539 |             |             |             |             |            |
| ANGEL2      | ANGEL2      | 2388.568087 | 2173.550057 | 2613.700959 |            |
| 2782.416372 |             |             |             |             |            |
| LYPLAL1     | LYPLAL1     | 1452.099395 | 1331.948658 | 1390.47999  |            |
| 1387.775525 |             |             |             |             |            |
| PRIMPOL     | PRIMPOL     | 1325.014656 | 1222.78697  | 853.0210042 |            |
| 1079.816858 |             |             |             |             |            |
| LOH12CR1    | LOH12CR1    |             | 1412.515624 | 1232.470668 |            |
| 1178.618564 | 1085.701418 |             |             |             |            |
| SLC9B2      | SLC9B2      | 2178.149093 | 1240.393694 | 1541.013108 |            |
| 1824.213765 |             |             |             |             |            |
| NUDT12      | NUDT12      | 9.375103698 | 35.21344766 | 99.24035213 |            |
| 124.5565313 |             |             |             |             |            |
| NAA40       | NAA40       | 1590.642594 | 1843.423985 | 1072.687851 |            |
| 1494.678375 |             |             |             |             |            |
| C11orf85    | C11orf85    |             | 0           | 11.44437049 | 12.2656615 |
|             | 23.53824213 |             |             |             |            |
| KIF3A       | KIF3A       | 2483.360802 | 1177.889824 | 1923.478735 |            |
| 1092.566739 |             |             |             |             |            |
| ERP27       | ERP27       | 319.7952039 | 378.5445623 | 185.0999826 |            |
| 209.882659  |             |             |             |             |            |
| DERA        | DERA        | 3042.741989 | 3127.834488 | 2503.310006 |            |
| 2400.900697 |             |             |             |             |            |
| RAN         | RAN         | 65517.39136 | 46708.87765 | 53736.97809 |            |
| 52670.7398  |             |             |             |             |            |
| ZNF140      | ZNF140      | 1526.058546 | 1300.256555 | 2700.67565  |            |

|              |              |             |             |             |
|--------------|--------------|-------------|-------------|-------------|
| 1797.733243  |              |             |             |             |
| MTTP         | MTTP         | 8.33342551  | 0           | 0           |
| SEMA6A       | SEMA6A       | 47.91719668 | 44.89714576 | 1.961520177 |
| 78.46080709  |              |             |             | 97.01023186 |
| RNF19B       | RNF19B       | 846.8843674 | 670.8161779 | 617.7433155 |
| 402.1116364  |              |             |             |             |
| ZCCHC10      | ZCCHC10      | 2621.904001 | 2090.798455 | 2270.262437 |
| 1894.828491  |              |             |             |             |
| TEX38        | TEX38        | 3.125034566 | 1.760672383 | 6.690360818 |
| 4.903800443  |              |             |             |             |
| PIF0         | PIF0         | 7.291747321 | 2.641008574 | 12.2656615  |
| 15.69216142  |              |             |             |             |
| C1orf162     | C1orf162     |             | 52.08390943 | 38.73479242 |
| 1038.120987  |              | 502.1491654 |             |             |
| CIART        | CIART        | 20.83356377 | 30.8117667  | 160.5686596 |
| 237.3439415  |              |             |             |             |
| PCDH18       | PCDH18       | 0           | 4.401680957 | 36.7969845  |
|              |              |             |             | 0           |
| C1orf131     | C1orf131     |             | 1581.26749  | 1478.084465 |
| 1090.528813  |              | 1161.219945 |             |             |
| RC3H1        | RC3H1        | 1748.977679 | 2398.035785 | 2063.976312 |
| 1899.732292  |              |             |             |             |
| FOSL1        | FOSL1        | 356.2539405 | 165.503204  | 506.2373019 |
| 610.0327752  |              |             |             |             |
| SLC35F3      | SLC35F3      | 713.5495593 | 291.3912794 | 340.0933416 |
| 276.574345   |              |             |             |             |
| MIA3         | MIA3         | 3379.204044 | 3703.574357 | 7108.508369 |
| 4688.033224  |              |             |             |             |
| SLC25A45     | SLC25A45     |             | 442.7132302 | 508.8343187 |
| 468.3252572  |              | 574.725412  |             |             |
| KRT78        | KRT78        | 1.041678189 | 0           | 0           |
| EIF4B        | EIF4B        | 7064.661476 | 6912.399775 | 10003.20448 |
| 8714.053388  |              |             |             |             |
| MPND         | MPND         | 145.8349464 | 419.0400271 | 128.2319157 |
| 179.4790962  |              |             |             |             |
| DDX46        | DDX46        | 3385.454113 | 3385.772992 | 2643.807583 |
| 2777.512571  |              |             |             |             |
| LOC102724105 | LOC102724105 |             | 23.95859834 | 19.36739621 |
| 114.851194   |              | 20.59596186 |             |             |
| CCDC181      | CCDC181      | 8.33342551  | 4.401680957 | 4.460240545 |
| 5.884560532  |              |             |             |             |
| MRPL2        | MRPL2        | 2042.730928 | 2008.927189 | 1832.043804 |
| 1988.98146   |              |             |             |             |
| ABLIM3       | ABLIM3       | 21.87524196 | 28.17075813 | 0           |
| CD55         | CD55         | 5766.730453 | 3164.808608 | 25.49976231 |
| 4110.365532  |              |             |             | 8049.619124 |
| DNAJB1       | DNAJB1       | 8700.096232 | 7174.73996  | 11129.41522 |
| 8267.807547  |              |             |             |             |
| SYDE1        | SYDE1        | 35.41705842 | 26.41008574 | 15.61084191 |
| 32.36508293  |              |             |             |             |
| CIB3         | CIB3         | 2.083356377 | 3.521344766 | 1.115060136 |

|             |             |             |             |             |
|-------------|-------------|-------------|-------------|-------------|
| 3.923040355 |             |             |             |             |
| SCLT1       | SCLT1       | 2010.438904 | 1421.742949 | 1234.371571 |
| 1142.585503 |             |             |             |             |
| GMFG        | GMFG        | 18152.28412 | 21913.32848 | 8045.158883 |
| 12032.94553 |             |             |             |             |
| IBTK        | IBTK        | 4202.129813 | 4829.524346 | 3280.506921 |
| 3228.662212 |             |             |             |             |
| SRSF10      | SRSF10      | 1187.513135 | 948.1220782 | 1121.750497 |
| 1125.912582 |             |             |             |             |
| BSDC1       | BSDC1       | 3289.61972  | 2978.177336 | 4067.739377 |
| 3606.254846 |             |             |             |             |
| YEATS4      | YEATS4      | 3279.202938 | 3513.42174  | 2320.440144 |
| 2489.169105 |             |             |             |             |
| CNOT8       | CNOT8       | 8505.302411 | 8236.425407 | 8102.02695  |
| 7385.123468 |             |             |             |             |
| ZNF567      | ZNF567      | 754.1750086 | 706.9099617 | 1401.630591 |
| 908.1838421 |             |             |             |             |
| TMCC3       | TMCC3       | 15.62517283 | 66.02521436 | 3.345180409 |
| 88.26840798 |             |             |             |             |
| C11orf30    | C11orf30    |             | 1867.728992 | 2192.917453 |
| 2096.313056 | 1775.17576  |             |             |             |
| ACER3       | ACER3       | 1491.683166 | 1161.163437 | 1142.93664  |
| 850.3189969 |             |             |             |             |
| CSRP2       | CSRP2       | 79.16754234 | 22.88874098 | 16.72590204 |
| 22.55748204 |             |             |             |             |
| ANKRD42     | ANKRD42     | 201.0438904 | 184.8706002 | 642.2746385 |
| 480.5724434 |             |             |             |             |
| SNRNP70     | SNRNP70     | 9936.568242 | 9077.14647  | 6331.311454 |
| 8484.555527 |             |             |             |             |
| MORN1       | MORN1       | 81.25089872 | 93.31563629 | 140.4975772 |
| 130.4410918 |             |             |             |             |
| LONP2       | LONP2       | 5760.480384 | 5054.890411 | 5137.082048 |
| 5683.504714 |             |             |             |             |
| NR2C2AP     | NR2C2AP     | 2126.065183 | 1945.542983 | 1885.56669  |
| 2271.440365 |             |             |             |             |
| ZNF101      | ZNF101      | 3139.618061 | 3273.08996  | 2881.315392 |
| 3889.694512 |             |             |             |             |
| ZNF91       | ZNF91       | 822.9257691 | 1282.649831 | 2941.528639 |
| 2004.673621 |             |             |             |             |
| C19orf40    | C19orf40    |             | 594.7982457 | 782.6188742 |
| 317.7921388 | 487.4377641 |             |             |             |
| ETV2        | ETV2        | 16.66685102 | 37.85445623 | 7.805420954 |
| 19.61520177 |             |             |             |             |
| CDK19       | CDK19       | 237.502627  | 542.2870939 | 204.0560049 |
| 178.4983361 |             |             |             |             |
| PPIA        | PPIA        | 105629.2934 | 102963.2406 | 78369.77156 |
| 84347.32915 |             |             |             |             |
| TMC06       | TMC06       | 977.094141  | 1200.778565 | 813.9938995 |
| 1379.929445 |             |             |             |             |
| MT1F        | MT1F        | 231.2525579 | 306.3569946 | 263.1541922 |

|              |              |             |             |             |             |
|--------------|--------------|-------------|-------------|-------------|-------------|
| 253.0361029  |              |             |             |             |             |
| FAM221A      | FAM221A      | 198.960534  | 172.5458935 | 333.4029807 |             |
| 246.1707823  |              |             |             |             |             |
| TJP1         | TJP1         | 2.083356377 | 0           | 0           | 18.63444168 |
| USP28        | USP28        | 3697.95757  | 4049.546481 | 1882.22151  |             |
| 2491.130625  |              |             |             |             |             |
| NUDT4        | NUDT4        | 5778.188913 | 4305.724312 | 5501.706712 |             |
| 4929.300206  |              |             |             |             |             |
| ERF          | ERF          | 83.3342551  | 285.228926  | 192.9054036 |             |
| 160.8446545  |              |             |             |             |             |
| ARL1         | ARL1         | 3158.368268 | 2490.471086 | 3339.605108 |             |
| 2830.473616  |              |             |             |             |             |
| VASH2        | VASH2        | 37.50041479 | 91.55496391 | 39.02710477 |             |
| 54.92256497  |              |             |             |             |             |
| ZNF114       | ZNF114       | 29.16698928 | 12.32470668 | 0           | 12.74988115 |
| RRN3         | RRN3         | 5052.139215 | 4620.004333 | 5672.310913 |             |
| 5820.811126  |              |             |             |             |             |
| LOC100506679 | LOC100506679 |             | 61.45901313 | 59.86286102 |             |
| 31.22168382  | 69.6339663   |             |             |             |             |
| USP46-AS1    | USP46-AS1    |             | 22.91692015 | 23.76907717 |             |
| 13.38072164  | 16.67292151  |             |             |             |             |
| MKLN1-AS     | MKLN1-AS     |             | 116.6679571 | 100.3583258 |             |
| 146.0728779  | 149.0755335  |             |             |             |             |
| LOC401585    | LOC401585    |             | 31.25034566 | 22.88874098 |             |
| 18.95602232  | 12.74988115  |             |             |             |             |
| HNRNPUL1     | HNRNPUL1     |             | 5485.477342 | 12205.86129 |             |
| 5391.315759  | 5244.124194  |             |             |             |             |
| BAHD1        | BAHD1        | 119.7929917 | 647.0471007 | 401.4216491 |             |
| 257.9399033  |              |             |             |             |             |
| MTERF1       | MTERF1       | 1395.848773 | 993.0192239 | 1265.593255 |             |
| 1329.91068   |              |             |             |             |             |
| VPS39        | VPS39        | 6020.899931 | 5948.431646 | 6446.162648 |             |
| 6723.110408  |              |             |             |             |             |
| LOC100419583 | LOC100419583 |             | 4733.385689 | 4502.039283 |             |
| 4867.237495  | 4223.152942  |             |             |             |             |
| LOC100288152 | LOC100288152 |             | 15.62517283 | 4.401680957 |             |
| 10.03554123  | 3.923040355  |             |             |             |             |
| USP30        | USP30        | 970.8440719 | 767.6531589 | 1374.869148 |             |
| 868.9534386  |              |             |             |             |             |
| LOC100507437 | LOC100507437 |             | 40.62544936 | 55.46118006 |             |
| 44.60240545  | 45.11496408  |             |             |             |             |
| NHLRC4       | NHLRC4       | 11.45846008 | 30.8117667  | 13.38072164 |             |
| 24.51900222  |              |             |             |             |             |
| LOC100507530 | LOC100507530 |             | 119.7929917 | 117.9650497 |             |
| 148.3029981  | 151.0370537  |             |             |             |             |
| LOC101926926 | LOC101926926 |             | 18.7502074  | 17.60672383 |             |
| 1.115060136  | 2.942280266  |             |             |             |             |
| LOC101927003 | LOC101927003 |             | 47.91719668 | 18.48706002 |             |
| 41.25722504  | 59.82636541  |             |             |             |             |
| LOC101927066 | LOC101927066 |             | 0           | 0           | 7.805420954 |
|              |              |             |             |             | 0           |



|               |              |             |             |             |             |
|---------------|--------------|-------------|-------------|-------------|-------------|
| DIAPH2-AS1    | DIAPH2-AS1   | 1.041678189 | 0           | 0           | 0           |
| MYEF2 MYEF2   | 452.0883339  | 665.5341607 | 289.9156354 |             |             |
| 491.3608044   |              |             |             |             |             |
| TMED3 TMED3   | 3606.289889  | 2775.700012 | 2309.289542 |             |             |
| 2468.573143   |              |             |             |             |             |
| CDKN2AIP      | CDKN2AIP     | 3316.703353 | 2759.85396  |             |             |
| 4460.240545   | 2973.664589  |             |             |             |             |
| LING01 LING01 | 0 0          | 0           | 4.903800443 |             |             |
| LOC101928323  | LOC101928323 | 1.041678189 | 0.880336191 |             |             |
| 3.345180409   | 0.980760089  |             |             |             |             |
| LOC102724297  | LOC102724297 | 34.37538023 | 30.8117667  |             |             |
| 21.18614259   | 21.57672195  |             |             |             |             |
| LOC102723582  | LOC102723582 | 26.04195472 | 11.44437049 |             |             |
| 26.76144327   | 8.826840798  |             |             |             |             |
| LOC101927056  | LOC101927056 | 4.166712755 | 1.760672383 |             |             |
| 11.15060136   | 2.942280266  |             |             |             |             |
| GATA2-AS1     | GATA2-AS1    | 3.125034566 | 1.760672383 |             | 0           |
| 0             |              |             |             |             |             |
| PAQR9-AS1     | PAQR9-AS1    | 15.62517283 | 25.52974955 |             |             |
| 3.345180409   | 20.59596186  |             |             |             |             |
| LOC101928739  | LOC101928739 | 0           | 1.760672383 | 0           | 0           |
| LOC102724699  | LOC102724699 | 1.041678189 | 24.64941336 |             |             |
| 4.460240545   | 4.903800443  |             |             |             |             |
| LOC100505920  | LOC100505920 | 5.208390943 | 13.20504287 |             | 0           |
| 0             |              |             |             |             |             |
| LOC101929337  | LOC101929337 | 0           | 9.683698106 | 0           | 0           |
| TUSC2 TUSC2   | 2636.487496  | 2411.240828 | 2859.014189 |             |             |
| 2165.518276   |              |             |             |             |             |
| LOC101927815  | LOC101927815 | 26.04195472 | 20.2477324  |             |             |
| 8.92048109    | 14.71140133  |             |             |             |             |
| LOC101929128  | LOC101929128 | 1.041678189 | 0           | 0           |             |
| 1.961520177   |              |             |             |             |             |
| LOC101929229  | LOC101929229 | 2.083356377 | 0           | 11.15060136 |             |
| 0             |              |             |             |             |             |
| LOC101929066  | LOC101929066 | 7.291747321 | 22.88874098 |             |             |
| 36.7969845    | 30.40356275  |             |             |             |             |
| LOC101929237  | LOC101929237 | 0           | 0           | 0           | 0.980760089 |
| LOC101927067  | LOC101927067 | 1.041678189 | 0           | 0           | 0           |
| LOC101927221  | LOC101927221 | 15.62517283 | 13.20504287 |             |             |
| 28.99156354   | 22.55748204  |             |             |             |             |
| LOC101927543  | LOC101927543 | 7.291747321 | 2.641008574 |             |             |
| 22.30120273   | 2.942280266  |             |             |             |             |
| LOC101927588  | LOC101927588 | 10.41678189 | 2.641008574 |             |             |
| 1.115060136   | 0.980760089  |             |             |             |             |
| LOC101927657  | LOC101927657 | 3.125034566 | 5.282017149 |             | 0           |
| 0             |              |             |             |             |             |
| LOC101927822  | LOC101927822 | 0           | 2.641008574 | 0           |             |
| 1.961520177   |              |             |             |             |             |
| ERC1 ERC1     | 1389.598704  | 1716.655573 | 1340.302284 |             |             |
| 1586.869823   |              |             |             |             |             |

|              |              |             |             |             |             |
|--------------|--------------|-------------|-------------|-------------|-------------|
| METTL8       | METTL8       | 1369.806818 | 1096.898895 | 1548.818529 |             |
| 1519.197377  |              |             |             |             |             |
| N6AMT1       | N6AMT1       | 477.0886104 | 377.6642261 | 448.2541748 |             |
| 501.1684053  |              |             |             |             |             |
| LOC100506022 | LOC100506022 |             | 13.54181645 | 9.683698106 |             |
| 31.22168382  | 6.865320621  |             |             |             |             |
| OAZ2         | OAZ2         | 3768.791687 | 3862.034872 | 3389.782814 |             |
| 3909.309713  |              |             |             |             |             |
| APOBEC3H     | APOBEC3H     |             | 1447.932682 | 871.5328295 |             |
| 618.8583756  | 495.2838448  |             |             |             |             |
| POT1-AS1     | POT1-AS1     |             | 21.87524196 | 18.48706002 |             |
| 21.18614259  | 21.57672195  |             |             |             |             |
| ZNF169       | ZNF169       | 122.9180263 | 184.8706002 | 389.1559876 |             |
| 206.9403787  |              |             |             |             |             |
| RNU6-2       | RNU6-2       | 30.20866747 | 58.10218863 | 44.60240545 |             |
| 40.21116364  |              |             |             |             |             |
| LLPH-AS1     | LLPH-AS1     |             | 52.08390943 | 66.90555055 |             |
| 42.37228518  | 67.67244612  |             |             |             |             |
| MT1G         | MT1G         | 189.5854303 | 393.5102776 | 212.976486  |             |
| 296.1895468  |              |             |             |             |             |
| MIR325HG     | MIR325HG     |             | 0           | 0.880336191 | 0           |
| CYP2C19      | CYP2C19      | 1.041678189 | 0           | 8.92048109  | 0           |
| TTTY14       | TTTY14       | 0           | 7.923025723 | 0           | 10.78836098 |
| UNC93B1      | UNC93B1      | 1169.804606 | 949.8827506 | 1271.168555 |             |
| 1083.739898  |              |             |             |             |             |
| LOC154872    | LOC154872    |             | 0           | 0           | 1.115060136 |
| NUDT17       | NUDT17       | 138.5431991 | 161.101523  | 157.2234792 | 0           |
| 180.4598563  |              |             |             |             |             |
| C1orf186     | C1orf186     |             | 8.33342551  | 3.521344766 | 0           |
| 7.846080709  |              |             |             |             |             |
| TBC1D3C      | TBC1D3C      | 42.70880574 | 54.58084387 | 51.29276627 |             |
| 65.71092594  |              |             |             |             |             |
| FM02         | FM02         | 0           | 0.880336191 | 0           | 0           |
| LINC01058    | LINC01058    |             | 2.083356377 | 4.401680957 |             |
| 7.805420954  | 3.923040355  |             |             |             |             |
| LINC01068    | LINC01068    |             | 6.250069132 | 14.08537906 | 0           |
| 20.59596186  |              |             |             |             |             |
| LINC00377    | LINC00377    |             | 0           | 0           | 0           |
| LINC01269    | LINC01269    |             | 1.041678189 | 0           | 2.942280266 |
| 3.923040355  |              |             |             |             | 1.115060136 |
| HTN1         | HTN1         | 0           | 0           | 0.980760089 |             |
| LINC01287    | LINC01287    |             | 0           | 0           | 1.115060136 |
| LURAP1L-AS1  | LURAP1L-AS1  |             | 0           | 0           | 2.230120273 |
| LINC01038    | LINC01038    |             | 0           | 0           | 0           |
| MYCNUT       | MYCNUT       | 0           | 0           | 0.980760089 | 1.961520177 |
| BIRC6-AS2    | BIRC6-AS2    |             | 9.375103698 | 16.72638764 |             |
| 16.72590204  | 11.76912106  |             |             |             |             |
