# Supplementary material
Source: PubMed Central journal article supplement (PMC8517598)
Supplement: IMM-164-555-s011.pdf [file IMM-164-555-s011.pdf]

#1.2

Differential\_Expression\_DESeq2\_compare\_2\_groups\_on\_L2\_Proliferating  
\_on\_L2\_Non\_Proliferating.norm

| Name        | Description | L2_CFSE_Lo_3_0 | L2_CFSE_Lo_2_0 | L2_CFSE_Hi_2_0 |
|-------------|-------------|----------------|----------------|----------------|
| 19721       | 4           |                |                |                |
| IFI6        | IFI6        | 7535.431659    | 7765.210728    | 16050.86787    |
| 10041.27525 |             |                |                |                |
| LRR75B      | LRR75B      | 23.42742627    | 53.82633646    | 0 13.19855915  |
| ASNSD1      | ASNSD1      | 3946.349955    | 4077.598885    | 4935.706603    |
| 4667.576167 |             |                |                |                |
| COMMD6      | COMMD6      | 3227.127969    | 2863.967336    | 3398.208996    |
| 3113.917204 |             |                |                |                |
| PIANP       | PIANP       | 3.51411394     | 5.07795627     | 14.28569205    |
| 15.0840676  |             |                |                |                |
| TNXB        | TNXB        | 3.51411394     | 0 0            | 0              |
| NSMF        | NSMF        | 1338.877411    | 1149.6493      | 1183.033873    |
| 1126.591299 |             |                |                |                |
| FBXL3       | FBXL3       | 4733.511478    | 3903.932781    | 6556.239795    |
| 6059.081402 |             |                |                |                |
| EPB41L1     | EPB41L1     | 2.342742627    | 1.015591254    | 2.678567259    |
| 0.942754225 |             |                |                |                |
| NEUROG3     | NEUROG3     | 0 0            | 14.28569205    | 0              |
| FNDC8       | FNDC8       | 52.71170911    | 64.99784026    | 83.03558503    |
| 53.73699081 |             |                |                |                |
| FIGF        | FIGF        | 0 5.07795627   | 0              | 0              |
| DFFB        | DFFB        | 871.5002572    | 800.2859082    | 861.6058017    |
| 799.4555826 |             |                |                |                |
| PPM1H       | PPM1H       | 23.42742627    | 9.140321286    | 0 0            |
| LRR46       | LRR46       | 124.1653592    | 74.13816155    | 83.03558503    |
| 102.7602105 |             |                |                |                |
| SNX6        | SNX6        | 6663.931402    | 6842.038279    | 5867.848009    |
| 6885.876857 |             |                |                |                |
| GNAS        | GNAS        | 9968.369878    | 9779.128185    | 9108.914392    |
| 9518.989407 |             |                |                |                |
| FHL2        | FHL2        | 658.3106782    | 603.2612049    | 63.39275847    |
| 274.3414794 |             |                |                |                |
| BDH1        | BDH1        | 3208.386028    | 4943.898225    | 2145.532375    |
| 2404.966027 |             |                |                |                |
| ER01LB      | ER01LB      | 190.9335241    | 132.026863     | 836.6058406    |
| 646.7293982 |             |                |                |                |
| ZNF790      | ZNF790      | 336.183567     | 302.6461937    | 633.9275847    |
| 693.8671094 |             |                |                |                |
| NPIPA5      | NPIPA5      | 46.85485254    | 8.124730032    | 24.99996108    |
| 65.05004151 |             |                |                |                |
| NPIPA2      | NPIPA2      | 3.51411394     | 0 0            | 8.484788022    |
| KLF5        | KLF5        | 125.3367305    | 379.831129     | 343.7494649    |
| 394.0712659 |             |                |                |                |
| SPTLC2      | SPTLC2      | 4896.33209     | 4417.821955    | 2461.603311    |
| 3022.470044 |             |                |                |                |

|              |              |             |             |             |
|--------------|--------------|-------------|-------------|-------------|
| AQP3         | AQP3         | 14397.32481 | 16568.35572 | 3802.672652 |
| 4842.928452  |              |             |             |             |
| CLTC         | CLTC         | 32022.94897 | 25578.68132 | 17844.61508 |
| 20914.05972  |              |             |             |             |
| TBC1D9       | TBC1D9       | 4.685485254 | 0           | 21.42853807 |
| HAT1         | HAT1         | 9185.89384  | 9509.996503 | 22.62610139 |
| 7829.573836  |              |             |             | 6433.918556 |
| PYCR2        | PYCR2        | 6025.534036 | 5447.631487 | 6101.776216 |
| 4980.570569  |              |             |             |             |
| NFX1         | NFX1         | 4601.146519 | 4904.290166 | 6937.489201 |
| 5413.294758  |              |             |             |             |
| GPT2         | GPT2         | 685.2522184 | 1369.01701  | 1108.926845 |
| 586.3931278  |              |             |             |             |
| KCNC2        | KCNC2        | 0           | 0           | 10.71426904 |
| ZFAND6       | ZFAND6       | 4103.313711 | 4412.743999 | 4.713771124 |
| 5216.259125  |              |             |             | 6081.240534 |
| CD19         | CD19         | 0           | 0           | 15.1785478  |
| RABL6        | RABL6        | 3407.519151 | 1815.877162 | 24.51160984 |
| 1291.573288  |              |             |             | 1381.24785  |
| IL15         | IL15         | 199.1331233 | 132.026863  | 516.963481  |
| 409.1553335  |              |             |             |             |
| CXCL8        | CXCL8        | 446.2924704 | 125.9333155 | 216.963948  |
| 85.79063445  |              |             |             |             |
| RASAL1       | RASAL1       | 26.94154021 | 48.74838019 | 55.35705669 |
| 112.1877527  |              |             |             |             |
| UTY          | UTY          | 1663.347265 | 0           | 0           |
| DACT3-AS1    | DACT3-AS1    | 13.3928363  | 1.171371313 | 2278.636961 |
| ZNF790-AS1   | ZNF790-AS1   | 203.5711117 | 63.25405093 | 3.046773762 |
| LOC100652999 | LOC100652999 | 347.3208879 | 506.0324074 | 63.98224901 |
| LOC400684    | LOC400684    | 11.60712479 | 39.82662466 | 358.5037127 |
| SLX1A        | SLX1A        | 105.4234182 | 95.46557788 | 37.5768764  |
| AKR1E2       | AKR1E2       | 53.88308042 | 73.12257029 | 143.7497762 |
| CPEB1        | CPEB1        | 0           | 11.17150379 | 49.99992217 |
| MORF4L2      | MORF4L2      | 5091.9511   | 5736.059403 | 49.02321969 |
| LTBP4        | LTBP4        | 1520.439965 | 774.8961268 | 6970.524864 |
| ASB9         | ASB9         | 43.3407386  | 32.49892013 | 1765.175824 |
| SPAG9        | SPAG9        | 2404.825307 | 1411.671843 | 25.89281684 |
| CSDE1        | CSDE1        | 27093.81848 | 27452.44719 | 33.93915209 |
| NBPF6        | NBPF6        | 0           | 0           | 1586.65536  |
|              |              |             |             | 26034.7809  |
|              |              |             |             | 12.49998054 |
|              |              |             |             | 0           |

|             |           |             |             |             |             |
|-------------|-----------|-------------|-------------|-------------|-------------|
| HLA-G       | HLA-G     | 8.199599194 | 2.031182508 | 9.821413283 |             |
| 8.484788022 |           |             |             |             |             |
| VIL1        | VIL1      | 1.171371313 | 1.015591254 | 0           | 0           |
| RAPGEFL1    | RAPGEFL1  | 46.42849916 | 89.02421982 | 49.76397145 |             |
| 68.8210584  |           |             |             |             |             |
| TIMP4       | TIMP4     | 3.51411394  | 7.109138778 | 0           | 13.19855915 |
| C1orf112    | C1orf112  | 1297.319409 | 3056.107757 | 3240.751692 |             |
| 2215.472428 |           |             |             |             |             |
| HAMP        | HAMP      | 0           | 1.015591254 | 0           | 0           |
| CCDC81      | CCDC81    | 14.05645576 | 1.015591254 | 42.85707615 |             |
| 26.39711829 |           |             |             |             |             |
| CCDC90B     | CCDC90B   | 2610.986658 | 3408.324249 | 3849.994007 |             |
| 3542.870376 |           |             |             |             |             |
| IFT74       | IFT74     | 1056.576925 | 1116.134788 | 1078.56975  |             |
| 1027.602105 |           |             |             |             |             |
| ASPN        | ASPN      | 7.028227881 | 6.093547524 | 5.357134518 |             |
| 5.656525348 |           |             |             |             |             |
| ZC2HC1B     | ZC2HC1B   | 3.51411394  | 6.093547524 | 0           | 8.484788022 |
| ALG10B      | ALG10B    | 297.5283136 | 152.3386881 | 130.3569399 |             |
| 166.8674978 |           |             |             |             |             |
| COPG2       | COPG2     | 93.70970508 | 151.3230969 | 89.2855753  |             |
| 163.0964809 |           |             |             |             |             |
| HRAS        | HRAS      | 1748.857371 | 2656.786721 | 1660.711701 |             |
| 1103.965197 |           |             |             |             |             |
| SPAG8       | SPAG8     | 51.54033779 | 24.3741901  | 80.35701777 |             |
| 99.93194782 |           |             |             |             |             |
| SLC12A1     | SLC12A1   | 0           | 0           | 9.821413283 | 0           |
| PADI4       | PADI4     | 8.199599194 | 33.51451138 | 99.99984434 |             |
| 61.27902461 |           |             |             |             |             |
| FAM198B     | FAM198B   | 0           | 0           | 2.678567259 | 2.828262674 |
| SLC25A37    | SLC25A37  | 467.8564146 | 265.9012882 | 262.0225435 |             |
| 468.5488497 |           |             |             |             |             |
| NEDD4L      | NEDD4L    | 332.669453  | 145.2295493 | 454.4635783 |             |
| 117.8442781 |           |             |             |             |             |
| DTNA        | DTNA      | 0           | 0           | 6.249990271 | 0           |
| MZT1        | MZT1      | 2327.5148   | 1808.768023 | 1391.962119 |             |
| 1633.793071 |           |             |             |             |             |
| FGFR2       | FGFR2     | 0           | 10.15591254 | 3.571423012 | 0.942754225 |
| GRM4        | GRM4      | 0           | 0           | 4.713771124 |             |
| C20orf24    | C20orf24  | 9956.234502 | 10357.26515 | 14854.03768 |             |
| 8168.022603 |           |             |             |             |             |
| GSTM4       | GSTM4     | 749.6776406 | 709.8982866 | 704.4631891 |             |
| 584.5076193 |           |             |             |             |             |
| FAM159B     | FAM159B   | 2.342742627 | 0           | 0           | 0           |
| EHD2        | EHD2      | 7.028227881 | 3.046773762 | 33.92851862 | 0           |
| DYNLL2      | DYNLL2    | 144.0786716 | 31.48332888 | 25.89281684 |             |
| 36.76741476 |           |             |             |             |             |
| TRPM8       | TRPM8     | 0           | 0           | 3.771016899 |             |
| LOC150776   | LOC150776 | 1766.961535 | 1089.375322 | 820.5977333 |             |
| 1439.585701 |           |             |             |             |             |

|               |             |             |             |             |   |
|---------------|-------------|-------------|-------------|-------------|---|
| LINC00989     | LINC00989   | 0           | 0           | 0.892855753 | 0 |
| LMCD1 LMCD1   | 279.9577439 | 386.9402678 |             | 316.0709366 |   |
| 135.7566084   |             |             |             |             |   |
| LINC00493     | LINC00493   | 1925.734439 |             | 1549.792254 |   |
| 1845.532842   | 1820.458408 |             |             |             |   |
| ASPM ASPM     | 6653.38906  | 4497.038073 |             | 1282.140861 |   |
| 2774.525683   |             |             |             |             |   |
| DOK3 DOK3     | 29.28428284 | 16.24946006 |             | 1.785711506 |   |
| 25.45436407   |             |             |             |             |   |
| USP4 USP4     | 7186.363008 | 8999.154102 |             | 6813.382251 |   |
| 8534.753996   |             |             |             |             |   |
| KHDC1 KHDC1   | 338.5263096 | 383.893494  |             | 174.9997276 |   |
| 231.9175393   |             |             |             |             |   |
| TRPC1 TRPC1   | 8.199599194 | 12.18709505 |             | 73.21417175 |   |
| 97.10368515   |             |             |             |             |   |
| SPP1 SPP1     | 112.4516461 | 1067.386408 |             | 871.427215  |   |
| 375.2161814   |             |             |             |             |   |
| ZFYVE1 ZFYVE1 | 1520.439965 | 1688.928255 |             | 1312.497957 |   |
| 1474.467607   |             |             |             |             |   |
| LCE5A LCE5A   | 0           | 0           | 0.892855753 | 0           |   |
| UPK1A UPK1A   | 0           | 7.109138778 | 28.5713841  | 6.599279573 |   |
| DKK3 DKK3     | 0           | 0           | 40.17850889 | 12.25580492 |   |
| HSP90AA1      | HSP90AA1    | 52103.76739 |             | 52195.29691 |   |
| 43026.71874   | 46520.20722 |             |             |             |   |
| CIZ1 CIZ1     | 4204.051644 | 3484.493593 |             | 2776.781392 |   |
| 3087.520086   |             |             |             |             |   |
| LACTB LACTB   | 1487.641568 | 2687.254458 |             | 2069.639636 |   |
| 1644.163368   |             |             |             |             |   |
| ZFH3 ZFH3     | 168.6774691 | 144.2139581 |             | 77.67845051 |   |
| 130.100083    |             |             |             |             |   |
| STX12 STX12   | 1172.542685 | 1247.14606  |             | 1070.534048 |   |
| 1467.868328   |             |             |             |             |   |
| CDC27 CDC27   | 6463.626908 | 5880.273361 |             | 3446.423207 |   |
| 4620.438455   |             |             |             |             |   |
| GPHA2 GPHA2   | 0           | 1.015591254 | 5.357134518 | 3.771016899 |   |
| UBTD1 UBTD1   | 67.93953618 | 93.43439537 |             | 323.2137826 |   |
| 162.1537267   |             |             |             |             |   |
| NAA25 NAA25   | 2692.98265  | 2918.809264 |             | 2981.245359 |   |
| 3981.251091   |             |             |             |             |   |
| CHN2 CHN2     | 35.1411394  | 84.29407409 |             | 146.4283435 |   |
| 38.65292321   |             |             |             |             |   |
| ZNF706 ZNF706 | 8529.925905 | 10658.63021 |             | 6938.382057 |   |
| 6680.356436   |             |             |             |             |   |
| NR1I3 NR1I3   | 269.4154021 | 283.3499599 |             | 147.3211993 |   |
| 202.6921583   |             |             |             |             |   |
| RIN2 RIN2     | 0           | 0           | 8.035701777 | 3.771016899 |   |
| ARL4A ARL4A   | 509.5465214 | 1210.584775 |             | 1303.569399 |   |
| 915.4143522   |             |             |             |             |   |
| ASIC4 ASIC4   | 0           | 0           | 7.142846024 | 0           |   |
| TFPI2 TFPI2   | 3.51411394  | 0           | 0           | 0           |   |

|             |         |             |             |             |
|-------------|---------|-------------|-------------|-------------|
| SNORA7B     | SNORA7B | 5.856856567 | 7.109138778 | 4.464278765 |
| 5.656525348 |         |             |             |             |
| TGIF1       | TGIF1   | 782.4760374 | 526.0762696 | 3822.315479 |
| 3205.364364 |         |             |             |             |
| CRB3        | CRB3    | 35.1411394  | 39.60805891 | 169.6425931 |
| 148.0124133 |         |             |             |             |
| SNORD85     | SNORD85 | 1.171371313 | 1.015591254 | 0           |
| INPP5D      | INPP5D  | 14616.37125 | 16330.70737 | 0.942754225 |
| 8694.07946  |         |             |             | 6904.453538 |
| ING1        | ING1    | 1265.081019 | 1146.602526 | 1615.176057 |
| 1268.004432 |         |             |             |             |
| LY96        | LY96    | 390.0666474 | 174.6816957 | 416.0707809 |
| 398.7850371 |         |             |             |             |
| ZBTB4       | ZBTB4   | 1119.830976 | 484.4370282 | 1856.247111 |
| 2034.463617 |         |             |             |             |
| MRPL4       | MRPL4   | 4877.590149 | 6866.412469 | 3699.994241 |
| 3557.954444 |         |             |             |             |
| GDI2        | GDI2    | 21281.47402 | 25156.19536 | 17160.68757 |
| 20273.9296  |         |             |             |             |
| CD300LD     | CD300LD | 0           | 6.093547524 | 0           |
| ITM2C       | ITM2C   | 6956.774231 | 6934.457083 | 1901.782754 |
| 1824.229425 |         |             |             |             |
| PPFIA2      | PPFIA2  | 1.171371313 | 0           | 0           |
| BCL2L12     | BCL2L12 | 2495.020898 | 3026.461937 | 1652.675999 |
| 1653.59091  |         |             |             |             |
| RGS11       | RGS11   | 0           | 0           | 3.571423012 |
| NOTCH3      | NOTCH3  | 0           | 0           | 1.885508449 |
| LAIR2       | LAIR2   | 771.9336956 | 1021.684802 | 0.942754225 |
| 326.1929618 |         |             |             | 146.4283435 |
| CCL4L2      | CCL4L2  | 1.171371313 | 0           | 10.71426904 |
| TMPRSS2     | TMPRSS2 | 0           | 2.031182508 | 12.25580492 |
| TOMM22      | TOMM22  | 5880.283994 | 7271.633379 | 4.713771124 |
| 4761.851589 |         |             |             | 5159.813397 |
| RNPEP       | RNPEP   | 3446.174404 | 4939.83586  | 3081.245204 |
| 3036.611358 |         |             |             |             |
| AP4B1       | AP4B1   | 3425.089721 | 3231.61137  | 2806.245632 |
| 3198.765084 |         |             |             |             |
| RIF1        | RIF1    | 5723.320238 | 4974.365962 | 8121.41593  |
| 7444.930113 |         |             |             |             |
| CEBPB       | CEBPB   | 794.1897505 | 587.0117448 | 1962.496945 |
| 1483.89515  |         |             |             |             |
| CDKN3       | CDKN3   | 4356.329915 | 5164.281527 | 1917.854158 |
| 2390.824714 |         |             |             |             |
| CD80        | CD80    | 256.5303176 | 905.9073986 | 265.1781587 |
| 328.0784702 |         |             |             |             |
| NCF2        | NCF2    | 596.2279986 | 1975.324989 | 829.4629946 |
| 344.105292  |         |             |             |             |
| KCNK12      | KCNK12  | 56.22582305 | 30.46773762 | 43.7499319  |
| 26.39711829 |         |             |             |             |
| C2orf43     | C2orf43 | 2454.022902 | 2220.082481 | 1396.426398 |

|                           |             |             |             |  |
|---------------------------|-------------|-------------|-------------|--|
| 1972.241838               |             |             |             |  |
| STAG3 STAG3               | 452.149327  | 305.6929675 | 513.392058  |  |
| 601.4771954               |             |             |             |  |
| LRRC27 LRRC27             | 124.1653592 | 249.8354485 | 225.8925055 |  |
| 179.1233027               |             |             |             |  |
| SCG5 SCG5                 | 62.08267961 | 25.38978135 | 6.249990271 |  |
| 17.91233027               |             |             |             |  |
| TC2N TC2N                 | 8146.887485 | 4707.265463 | 4791.956827 |  |
| 5415.180267               |             |             |             |  |
| LPAR5 LPAR5               | 564.6009731 | 724.1165641 | 647.3204209 |  |
| 972.9223599               |             |             |             |  |
| DGCR2 DGCR2               | 5564.013739 | 5281.074521 | 6729.453811 |  |
| 5376.527344               |             |             |             |  |
| WDR25 WDR25               | 706.336902  | 1259.333155 | 996.4270204 |  |
| 736.2910495               |             |             |             |  |
| SLC12A8 SLC12A8           | 35.1411394  | 19.29623383 | 12.49998054 |  |
| 43.36669434               |             |             |             |  |
| ZNF621 ZNF621             | 668.85302   | 407.2520929 | 437.499319  |  |
| 515.6865609               |             |             |             |  |
| SEC14L3 SEC14L3           | 5.856856567 | 0 0         | 0           |  |
| TRAK1 TRAK1               | 1671.546864 | 1412.687434 | 1427.676349 |  |
| 1294.401551               |             |             |             |  |
| IFIT1B IFIT1B             | 9.370970508 | 4.062365016 | 26.78567259 |  |
| 27.33987252               |             |             |             |  |
| DEPDC5 DEPDC5             | 1625.863383 | 1635.101919 | 1674.997393 |  |
| 1435.814684               |             |             |             |  |
| SMAGP SMAGP               | 182.7339249 | 232.5703972 | 349.1065994 |  |
| 296.9675808               |             |             |             |  |
| PTTG1IP PTTG1IP           | 6376.94543  | 7813.959109 | 6073.204832 |  |
| 6208.979324               |             |             |             |  |
| HMG3 HMG3                 | 3149.817462 | 3377.856511 | 2841.959862 |  |
| 2618.028482               |             |             |             |  |
| LOC103344931 LOC103344931 | 16.39919839 | 3.046773762 |             |  |
| 25.89281684               | 27.33987252 |             |             |  |
| ELN ELN                   | 1.171371313 | 0 0         | 0           |  |
| HDGF HDGF                 | 8918.821181 | 10703.31623 | 5333.920269 |  |
| 5865.816786               |             |             |             |  |
| PAN2 PAN2                 | 1751.200114 | 1348.705185 | 2064.282501 |  |
| 1841.199001               |             |             |             |  |
| BBC3 BBC3                 | 422.8650442 | 380.8467203 | 1486.604829 |  |
| 349.7618174               |             |             |             |  |
| SPECC1L SPECC1L           | 1461.871399 | 1050.121357 | 1512.497646 |  |
| 1379.249431               |             |             |             |  |
| CYP27B1 CYP27B1           | 268.2440308 | 224.4456671 | 278.5709949 |  |
| 383.7009695               |             |             |             |  |
| HPX HPX                   | 0 0         | 16.96425931 | 5.656525348 |  |
| SLC12A2 SLC12A2           | 2456.365644 | 1528.464837 | 1152.676777 |  |
| 1617.76625                |             |             |             |  |
| CD59 CD59                 | 10092.53524 | 14760.60329 | 7216.060196 |  |
| 7244.123463               |             |             |             |  |

|             |             |             |             |             |             |
|-------------|-------------|-------------|-------------|-------------|-------------|
| CYP27A1     | CYP27A1     | 1.171371313 | 4.062365016 | 49.99992217 |             |
| 11.3130507  |             |             |             |             |             |
| RGS8        | RGS8        | 0           | 0           | 7.142846024 | 0           |
| PTPRJ       | PTPRJ       | 4841.277639 | 2647.646399 | 1177.676738 |             |
| 2202.273869 |             |             |             |             |             |
| ZNF219      | ZNF219      | 126.5081019 | 162.4946006 | 173.2140161 |             |
| 180.0660569 |             |             |             |             |             |
| SH2D3C      | SH2D3C      | 7241.41746  | 7553.967748 | 4341.957527 |             |
| 4787.305953 |             |             |             |             |             |
| AAED1       | AAED1       | 632.5405093 | 579.9026061 | 900.8914548 |             |
| 725.920753  |             |             |             |             |             |
| SNX18       | SNX18       | 780.1332948 | 299.5994199 | 239.2853418 |             |
| 197.035633  |             |             |             |             |             |
| DHX16       | DHX16       | 196.7903807 | 1.015591254 | 0           | 251.715378  |
| ANXA9       | ANXA9       | 17.5705697  | 29.45214637 | 41.96422039 |             |
| 42.42394011 |             |             |             |             |             |
| IFI16       | IFI16       | 15619.06509 | 13202.6863  | 15064.26227 |             |
| 15755.3086  |             |             |             |             |             |
| LRRC32      | LRRC32      | 209.6754651 | 1393.391201 | 433.927896  |             |
| 444.0372398 |             |             |             |             |             |
| GINS3       | GINS3       | 1299.050787 | 1335.502499 | 853.5700999 |             |
| 902.2157931 |             |             |             |             |             |
| SCLY        | SCLY        | 4584.747321 | 5315.604624 | 3226.780691 |             |
| 2666.108947 |             |             |             |             |             |
| FAM160B2    | FAM160B2    |             | 1567.294817 | 1287.76971  |             |
| 2132.139538 | 3134.657797 |             |             |             |             |
| FN3K        | FN3K        | 3.51411394  | 0           | 7.142846024 | 8.484788022 |
| SAV1        | SAV1        | 583.3429141 | 741.3816155 | 1491.961963 |             |
| 1356.623329 |             |             |             |             |             |
| PAK7        | PAK7        | 0           | 0           | 4.464278765 | 0           |
| FAM186B     | FAM186B     | 9.370970508 | 10.15591254 | 59.82133545 |             |
| 17.91233027 |             |             |             |             |             |
| MYCBPAP     | MYCBPAP     | 173.3629544 | 101.5591254 | 130.3569399 |             |
| 54.67974503 |             |             |             |             |             |
| SPATA9      | SPATA9      | 127.6794732 | 189.9155645 | 247.3210436 |             |
| 215.8907175 |             |             |             |             |             |
| LRRC8E      | LRRC8E      | 2.342742627 | 6.093547524 | 24.99996108 |             |
| 14.14131337 |             |             |             |             |             |
| CNOT11      | CNOT11      | 7258.98803  | 7832.239751 | 5516.955698 |             |
| 6818.941307 |             |             |             |             |             |
| ZNF223      | ZNF223      | 7.028227881 | 11.17150379 | 343.7494649 |             |
| 245.1160984 |             |             |             |             |             |
| POGK        | POGK        | 3694.505123 | 4360.948845 | 4941.956593 |             |
| 4965.486502 |             |             |             |             |             |
| PKN3        | PKN3        | 625.5122814 | 746.4595717 | 532.1420288 |             |
| 353.5328343 |             |             |             |             |             |
| ASAP2       | ASAP2       | 8.199599194 | 9.140321286 | 9.821413283 |             |
| 13.19855915 |             |             |             |             |             |
| PROM1       | PROM1       | 0           | 0           | 0.892855753 | 0           |
| LOC375196   | LOC375196   |             | 26.94154021 | 26.40537261 | 0           |

|             |             |             |             |             |
|-------------|-------------|-------------|-------------|-------------|
|             | 16.96957604 |             |             |             |
| WASH5P      | WASH5P      | 2.342742627 | 4.062365016 | 2.678567259 |
| 6.599279573 |             |             |             |             |
| HNMT        | HNMT        | 1.171371313 | 0           | 32.14280711 |
| DALRD3      | DALRD3      | 2510.248725 | 2842.63992  | 2595.531674 |
| 2820.72064  |             |             |             |             |
| ACOT9       | ACOT9       | 2233.805095 | 3325.045766 | 1773.211526 |
| 2337.087723 |             |             |             |             |
| CHD2        | CHD2        | 4632.773545 | 4570.160643 | 10908.01873 |
| 9179.597886 |             |             |             |             |
| HENMT1      | HENMT1      | 2466.907986 | 2301.329782 | 2364.282034 |
| 2206.044886 |             |             |             |             |
| NREP        | NREP        | 783.6474087 | 273.1940473 | 99.10698859 |
| 323.3646991 |             |             |             |             |
| SCN2A       | SCN2A       | 1.171371313 | 0           | 0           |
| CALCA       | CALCA       | 0           | 1.015591254 | 0           |
| PSMD14      | PSMD14      | 10418.17646 | 14635.68556 | 6763.382329 |
| 7937.047818 |             |             |             |             |
| EIF3E       | EIF3E       | 7269.530371 | 7652.480099 | 7341.952857 |
| 8212.332051 |             |             |             |             |
| USP47       | USP47       | 8231.22622  | 8567.527819 | 8871.414762 |
| 9530.302458 |             |             |             |             |
| PAQR5       | PAQR5       | 1.171371313 | 3.046773762 | 0.892855753 |
| 11.3130507  |             |             |             |             |
| CXCL10      | CXCL10      | 1646.948067 | 360.5348952 | 5033.920736 |
| 3767.245882 |             |             |             |             |
| SH3GLB1     | SH3GLB1     | 5445.705236 | 5328.80731  | 4368.7432   |
| 5758.342805 |             |             |             |             |
| C1orf106    | C1orf106    |             | 10.54234182 | 57.88870148 |
| 14.28569205 |             | 16.02682182 |             |             |
| ASH1L       | ASH1L       | 2561.789063 | 1839.235761 | 4567.850033 |
| 4532.762312 |             |             |             |             |
| TAP2        | TAP2        | 17.5705697  | 514.9047658 | 646.4275652 |
| 32.05364364 |             |             |             |             |
| CASP6       | CASP6       | 2441.137817 | 2869.045293 | 1618.74748  |
| 1764.835909 |             |             |             |             |
| CASP4       | CASP4       | 3758.930545 | 3261.063517 | 4474.993034 |
| 4325.356383 |             |             |             |             |
| CASP1       | CASP1       | 2251.375664 | 2884.279162 | 4208.029164 |
| 4410.204263 |             |             |             |             |
| GNAT2       | GNAT2       | 42.16936728 | 37.5768764  | 52.67848943 |
| 16.96957604 |             |             |             |             |
| MRPL50      | MRPL50      | 2149.46636  | 2062.665837 | 2113.389567 |
| 2459.645772 |             |             |             |             |
| UTS2R       | UTS2R       | 10.54234182 | 0           | 0           |
| SNX9        | SNX9        | 5016.983336 | 6672.434539 | 6458.025662 |
| 7375.1663   |             |             |             |             |
| PACSIN3     | PACSIN3     | 154.6210134 | 189.9155645 | 72.321316   |
| 76.3630922  |             |             |             |             |
| UBXN1       | UBXN1       | 4085.743141 | 4640.23644  | 4967.84941  |



|             |         |             |             |             |
|-------------|---------|-------------|-------------|-------------|
| 3793.643    |         |             |             |             |
| IL17RA      | IL17RA  | 3664.049469 | 3249.892013 | 5246.420405 |
| 4468.655025 |         |             |             |             |
| HSD17B8     | HSD17B8 | 0           | 2.031182508 | 5.357134518 |
|             |         |             |             | 0.942754225 |
| RNF14       | RNF14   | 3200.186428 | 3292.546846 | 3251.780653 |
| 3210.078135 |         |             |             |             |
| PKIB        | PKIB    | 18.74194102 | 28.43655511 | 33.92851862 |
| 19.79783872 |         |             |             |             |
| ZNF410      | ZNF410  | 6344.147034 | 7788.569327 | 7638.380967 |
| 6486.149066 |         |             |             |             |
| EML5        | EML5    | 94.88107639 | 66.01343151 | 182.1425736 |
| 139.5276253 |         |             |             |             |
| EIF3L       | EIF3L   | 9361.599537 | 11556.41288 | 8471.415385 |
| 9094.750006 |         |             |             |             |
| CCDC82      | CCDC82  | 2530.162037 | 2072.82175  | 2831.245593 |
| 2884.827928 |         |             |             |             |
| ACBD4       | ACBD4   | 518.9174919 | 483.4214369 | 453.5707225 |
| 593.9351616 |         |             |             |             |
| COL11A2     | COL11A2 | 0           | 2.031182508 | 0           |
|             |         |             |             | 0           |
| CAMK2B      | CAMK2B  | 7.028227881 | 20.31182508 | 46.42849916 |
| 64.10728728 |         |             |             |             |
| LMNB1       | LMNB1   | 7553.002229 | 3069.11677  | 1275.890871 |
| 2211.701411 |         |             |             |             |
| OMD         | OMD     | 23.42742627 | 23.35859884 | 0.892855753 |
| 20.74059294 |         |             |             |             |
| OXSR1       | OXSR1   | 5028.697049 | 4263.452085 | 2942.852562 |
| 3697.482069 |         |             |             |             |
| NRD1        | NRD1    | 12480.96134 | 12913.2428  | 10242.8412  |
| 11747.66039 |         |             |             |             |
| B4GALT5     | B4GALT5 | 1170.199942 | 374.7531727 | 177.6782949 |
| 345.9908005 |         |             |             |             |
| MSH5        | MSH5    | 19.91331233 | 26.40537261 | 9.821413283 |
| 18.85508449 |         |             |             |             |
| USB1        | USB1    | 6216.467561 | 7406.707016 | 4466.064477 |
| 5190.804761 |         |             |             |             |
| SNORD25     | SNORD25 | 29.28428284 | 34.53010264 | 100.8927001 |
| 32.05364364 |         |             |             |             |
| SNORD26     | SNORD26 | 16.39919839 | 16.24946006 | 51.78563368 |
| 24.51160984 |         |             |             |             |
| SNORD27     | SNORD27 | 10.54234182 | 20.31182508 | 52.67848943 |
| 40.53843166 |         |             |             |             |
| SNORD28     | SNORD28 | 9.370970508 | 13.2026863  | 32.14280711 |
| 23.56885562 |         |             |             |             |
| SNORD30     | SNORD30 | 12.88508445 | 14.21827756 | 9.821413283 |
| 17.91233027 |         |             |             |             |
| SNORD31     | SNORD31 | 38.65525334 | 23.35859884 | 48.21421066 |
| 67.87830418 |         |             |             |             |
| CPZ         | CPZ     | 0           | 13.2026863  | 0           |
|             |         |             |             | 0           |
| MGEA5       | MGEA5   | 10494.3156  | 6074.25129  | 10197.30556 |
| 9484.107501 |         |             |             |             |

|             |             |             |             |             |
|-------------|-------------|-------------|-------------|-------------|
| MS4A6A      | MS4A6A      | 17.5705697  | 9.140321286 | 4.464278765 |
| 30.16813519 |             |             |             |             |
| GPAM        | GPAM        | 918.3551098 | 759.662258  | 945.5342425 |
| 884.3034628 |             |             |             |             |
| GPR161      | GPR161      | 11.71371313 | 66.01343151 | 58.03562395 |
| 48.08046546 |             |             |             |             |
| C1orf85     | C1orf85     | 1635.234354 | 1956.028755 | 586.6062297 |
| 1023.831088 |             |             |             |             |
| NOC4L       | NOC4L       | 2792.549211 | 3904.948372 | 2469.639013 |
| 2390.824714 |             |             |             |             |
| MTX1        | MTX1        | 2472.764843 | 3754.640866 | 1724.104459 |
| 1695.072096 |             |             |             |             |
| SNORA38     | SNORA38     | 0           | 0           | 0.942754225 |
| SNORD10     | SNORD10     | 51.54033779 | 37.5768764  | 170.5354488 |
| 157.4399555 |             |             |             |             |
| DICER1-AS1  | DICER1-AS1  |             | 44.51210991 | 31.48332888 |
| 76.78559476 | 62.22177883 |             |             |             |
| SLC7A5P1    | SLC7A5P1    |             | 132.3649584 | 112.7306292 |
| 311.6066578 | 200.8066499 |             |             |             |
| SNORD37     | SNORD37     | 10.54234182 | 8.124730032 | 8.92855753  |
| 5.656525348 |             |             |             |             |
| SNORD96A    | SNORD96A    |             | 59.73993699 | 53.82633646 |
| 101.7855558 | 77.30584643 |             |             |             |
| SGCD        | SGCD        | 2.342742627 | 0           | 8.92855753  |
| CR2         | CR2         | 0           | 7.109138778 | 154.4640453 |
| TNIP2       | TNIP2       | 6319.548236 | 7934.814468 | 5418.741565 |
| 6104.333605 |             |             |             |             |
| GLA         | GLA         | 1273.280618 | 2372.421169 | 1535.711895 |
| 947.4679958 |             |             |             |             |
| MPO         | MPO         | 56.22582305 | 108.6682642 | 2.678567259 |
| 10.37029647 |             |             |             |             |
| GK          | GK          | 6554.99387  | 8253.710122 | 1830.354294 |
| 3861.521304 |             |             |             |             |
| ATP8B5P     | ATP8B5P     | 0           | 0           | 0.942754225 |
| KLHDC4      | KLHDC4      | 1040.177726 | 2441.481375 | 1233.926651 |
| 849.4215565 |             |             |             |             |
| ZNF775      | ZNF775      | 718.0506152 | 661.1499064 | 555.3562784 |
| 505.3162644 |             |             |             |             |
| RIMKLA      | RIMKLA      | 44.51210991 | 81.24730032 | 33.92851862 |
| 51.85148236 |             |             |             |             |
| TYR03       | TYR03       | 106.5947895 | 27.42096386 | 24.10710533 |
| 44.30944856 |             |             |             |             |
| MIR198      | MIR198      | 0           | 1.015591254 | 0           |
| RAD9B       | RAD9B       | 79.65324932 | 76.16934405 | 147.3211993 |
| 122.5580492 |             |             |             |             |
| TBCK        | TBCK        | 2557.103577 | 2184.536787 | 1478.569127 |
| 2526.581322 |             |             |             |             |
| KLHDC9      | KLHDC9      | 56.22582305 | 38.59246765 | 36.60708587 |
| 40.53843166 |             |             |             |             |
| DLG1        | DLG1        | 2569.988662 | 1837.204579 | 2363.389178 |

|             |             |             |             |             |             |
|-------------|-------------|-------------|-------------|-------------|-------------|
| 2574.661788 |             |             |             |             |             |
| RCBTB2      | RCBTB2      | 1550.895619 | 1998.683588 | 1523.211915 |             |
| 1074.739816 |             |             |             |             |             |
| SORBS1      | SORBS1      | 78.481878   | 82.26289158 | 139.2854975 |             |
| 136.6993626 |             |             |             |             |             |
| LRRC23      | LRRC23      | 165.1633552 | 107.6526729 | 199.1068329 |             |
| 292.2538097 |             |             |             |             |             |
| SLC6A9      | SLC6A9      | 50.36896648 | 37.5768764  | 233.0353515 |             |
| 230.9747851 |             |             |             |             |             |
| FANCB       | FANCB       | 582.1715428 | 520.9983133 | 462.4992801 |             |
| 458.1785532 |             |             |             |             |             |
| MS4A1       | MS4A1       | 0           | 0           | 124.1069497 | 53.73699081 |
| TRIM52-AS1  | TRIM52-AS1  |             |             | 371.3247064 | 319.911245  |
| 426.7850499 | 367.6741476 |             |             |             |             |
| KIF25-AS1   | KIF25-AS1   |             | 0           | 0           | 21.42853807 |
| LOC727751   | LOC727751   |             | 1.171371313 | 0           | 1.785711506 |
|             | 0.942754225 |             |             |             |             |
| CPED1       | CPED1       | 17.5705697  | 10.15591254 | 1.785711506 |             |
| 6.599279573 |             |             |             |             |             |
| C1orf204    | C1orf204    |             | 32.79839678 | 24.3741901  |             |
| 136.6069302 | 16.96957604 |             |             |             |             |
| LDB1        | LDB1        | 3159.188432 | 3025.446346 | 3548.208763 |             |
| 3390.144192 |             |             |             |             |             |
| FAM135A     | FAM135A     | 317.4416259 | 431.626283  | 699.1060546 |             |
| 319.5936822 |             |             |             |             |             |
| GRB10       | GRB10       | 114.7943887 | 80.23170907 | 409.8207906 |             |
| 234.745802  |             |             |             |             |             |
| KIAA1462    | KIAA1462    |             | 3.51411394  | 2.031182508 | 0           |
|             | 0.942754225 |             |             |             |             |
| SLC10A3     | SLC10A3     | 2216.234525 | 3374.809737 | 3767.851278 |             |
| 2668.93721  |             |             |             |             |             |
| AICDA       | AICDA       | 2.342742627 | 1.015591254 | 0           | 63.16453306 |
| COL6A3      | COL6A3      | 650.111079  | 35.54569389 | 167.8568816 |             |
| 850.3643107 |             |             |             |             |             |
| TAB1        | TAB1        | 518.9174919 | 224.4456671 | 336.6066189 |             |
| 296.0248266 |             |             |             |             |             |
| KRTAP10-1   | KRTAP10-1   |             | 0           | 0           | 2.828262674 |
| CECR1       | CECR1       | 1482.956083 | 675.3681839 | 1800.890054 |             |
| 1659.247436 |             |             |             |             |             |
| GYPE        | GYPE        | 57.39719436 | 2.031182508 | 0           | 64.10728728 |
| HKDC1       | HKDC1       | 83.16736326 | 125.9333155 | 128.5712284 |             |
| 89.56165135 |             |             |             |             |             |
| C9orf72     | C9orf72     | 506.0324074 | 405.2209104 | 1330.355072 |             |
| 778.7149896 |             |             |             |             |             |
| MIXL1       | MIXL1       | 7.028227881 | 8.124730032 | 1.785711506 | 0           |
| CDC42SE1    | CDC42SE1    |             | 5887.312221 | 5970.660983 |             |
| 3205.352153 | 2967.790299 |             |             |             |             |
| INCENP      | INCENP      | 497.8328082 | 286.3967336 | 110.7141134 |             |
| 185.7225823 |             |             |             |             |             |
| RNF149      | RNF149      | 10349.06555 | 10065.52492 | 9857.127513 |             |

|              |              |             |             |             |
|--------------|--------------|-------------|-------------|-------------|
| 8361.287219  |              |             |             |             |
| PEX5L        | PEX5L        | 12.88508445 | 4.062365016 | 11.60712479 |
| 14.14131337  |              |             |             |             |
| SCML1        | SCML1        | 12.88508445 | 15.23386881 | 1105.355422 |
| 601.4771954  |              |             |             |             |
| VEGFA        | VEGFA        | 66.76816487 | 158.4322356 | 179.4640064 |
| 158.3827098  |              |             |             |             |
| FM05         | FM05         | 21.08468364 | 19.29623383 | 46.42849916 |
| 48.08046546  |              |             |             |             |
| PTMS         | PTMS         | 722.7361004 | 355.4569389 | 184.8211409 |
| 349.7618174  |              |             |             |             |
| RRAGD        | RRAGD        | 103.0806756 | 41.63924142 | 558.0348456 |
| 479.8619004  |              |             |             |             |
| BBS7         | BBS7         | 1147.943887 | 1134.415431 | 989.2841744 |
| 780.6004981  |              |             |             |             |
| RBM41        | RBM41        | 1009.722072 | 908.9541724 | 987.4984629 |
| 1056.827486  |              |             |             |             |
| STARD3       | STARD3       | 2737.49476  | 3747.531727 | 3657.137164 |
| 2773.582929  |              |             |             |             |
| LOC101060553 | LOC101060553 |             | 1.171371313 | 3.046773762 |
| 29.46423985  | 0            |             |             |             |
| FUZ          | FUZ          | 400.6089892 | 247.804266  | 297.3209658 |
| 272.4559709  |              |             |             |             |
| GSR          | GSR          | 4557.805781 | 7307.179073 | 7092.846102 |
| 4704.343581  |              |             |             |             |
| E2F7         | E2F7         | 999.1797304 | 1008.482115 | 363.3922915 |
| 415.7546131  |              |             |             |             |
| STMN1        | STMN1        | 54848.29038 | 65172.52195 | 23863.35571 |
| 32545.76135  |              |             |             |             |
| TMEM106B     | TMEM106B     |             | 2541.87575  | 1894.077689 |
| 4042.85085   | 3935.056134  |             |             |             |
| RPS10        | RPS10        | 10210.84374 | 13672.90505 | 12888.3728  |
| 10447.60232  |              |             |             |             |
| SNUPN        | SNUPN        | 2852.289148 | 3609.411317 | 2608.031655 |
| 2633.11255   |              |             |             |             |
| INADL        | INADL        | 568.115087  | 466.1563856 | 1283.033717 |
| 1626.251038  |              |             |             |             |
| SUGT1P1      | SUGT1P1      | 50.36896648 | 21.32741634 | 11.60712479 |
| 24.51160984  |              |             |             |             |
| USP10        | USP10        | 10503.68657 | 13369.24327 | 12198.1953  |
| 11834.39378  |              |             |             |             |
| SCARNA2      | SCARNA2      | 14.05645576 | 7.109138778 | 18.74997081 |
| 7.542033798  |              |             |             |             |
| SNORA13      | SNORA13      | 3.51411394  | 3.046773762 | 12.49998054 |
| 6.599279573  |              |             |             |             |
| SNORA75      | SNORA75      | 19.91331233 | 16.24946006 | 37.49994163 |
| 30.16813519  |              |             |             |             |
| NUMB         | NUMB         | 4281.362151 | 4929.679947 | 4019.6366   |
| 4823.130614  |              |             |             |             |
| SYTL2        | SYTL2        | 3237.67031  | 1431.983668 | 1414.283513 |

|             |             |             |             |             |
|-------------|-------------|-------------|-------------|-------------|
| 2077.830311 |             |             |             |             |
| RPL23AP64   | RPL23AP64   |             | 7.028227881 | 4.062365016 |
| 22.32139383 | 21.68334717 |             |             |             |
| SNORD6      | SNORD6      | 1.171371313 | 1.015591254 | 5.357134518 |
| 3.771016899 |             |             |             |             |
| TOB2P1      | TOB2P1      | 3.51411394  | 0           | 3.571423012 |
| SNORA16A    | SNORA16A    |             | 7.028227881 | 6.093547524 |
| 16.96425931 | 12.25580492 |             |             |             |
| RRP7B       | RRP7B       | 737.9639275 | 417.4080054 | 970.5342035 |
| 1017.231808 |             |             |             |             |
| ASAH1       | ASAH1       | 1682.089206 | 2067.743793 | 3612.494377 |
| 2579.375559 |             |             |             |             |
| STX4        | STX4        | 1246.339078 | 809.4262295 | 991.9627416 |
| 1060.598503 |             |             |             |             |
| ATP7A       | ATP7A       | 1754.714228 | 894.7358948 | 1141.069652 |
| 1384.905956 |             |             |             |             |
| CRTC3       | CRTC3       | 4972.471226 | 3187.940946 | 3430.351803 |
| 3988.793125 |             |             |             |             |
| CYP2C9      | CYP2C9      | 1.171371313 | 0           | 0           |
| NDUFB6      | NDUFB6      | 3558.62605  | 3611.442499 | 0.942754225 |
| 3008.328731 |             |             |             | 2766.959979 |
| RALGPS1     | RALGPS1     | 113.6230174 | 76.16934405 | 119.6426709 |
| 157.4399555 |             |             |             |             |
| NDUFS1      | NDUFS1      | 6542.108786 | 8661.977806 | 6179.454667 |
| 5638.613018 |             |             |             |             |
| ZNF275      | ZNF275      | 1274.451989 | 1153.711665 | 1275.890871 |
| 1386.791465 |             |             |             |             |
| SWI5        | SWI5        | 789.5042653 | 887.626756  | 731.2488617 |
| 619.3895256 |             |             |             |             |
| ADAM12      | ADAM12      | 1102.260406 | 19.29623383 | 65.17846997 |
| 833.3947346 |             |             |             |             |
| TRIP10      | TRIP10      | 579.8288002 | 740.3660242 | 1147.319643 |
| 961.6093092 |             |             |             |             |
| IFI27       | IFI27       | 443.9497278 | 1263.39552  | 318.7495038 |
| 827.7382093 |             |             |             |             |
| HELLS       | HELLS       | 3624.222844 | 2551.16523  | 1348.212187 |
| 1756.351121 |             |             |             |             |
| FAM220A     | FAM220A     | 282.3004865 | 107.6526729 | 163.3926028 |
| 210.2341921 |             |             |             |             |
| NF2         | NF2         | 7568.230056 | 5817.306703 | 2954.459687 |
| 3933.170626 |             |             |             |             |
| ZNF146      | ZNF146      | 6744.756023 | 5991.988399 | 7584.809622 |
| 9123.975387 |             |             |             |             |
| MTFR1L      | MTFR1L      | 2777.321384 | 3329.108131 | 2903.566909 |
| 2996.072926 |             |             |             |             |
| ACACA       | ACACA       | 1384.560893 | 638.8068988 | 555.3562784 |
| 861.6773614 |             |             |             |             |
| FBRSL1      | FBRSL1      | 270.5867734 | 132.026863  | 98.21413283 |
| 149.8979217 |             |             |             |             |
| KHK         | KHK         | 691.1090749 | 1430.968077 | 938.3913964 |

|                 |               |                     |             |  |
|-----------------|---------------|---------------------|-------------|--|
| 616.561263      |               |                     |             |  |
| CENPW CENPW     | 2435.280961   | 2611.085114         | 772.3202264 |  |
| 1294.401551     |               |                     |             |  |
| HAGH HAGH       | 2216.234525   | 3151.379661         | 2561.603155 |  |
| 2262.610139     |               |                     |             |  |
| FBX018 FBX018   | 6482.368849   | 7640.293004         | 8072.308863 |  |
| 7398.735156     |               |                     |             |  |
| ARPP21 ARPP21   | 0 1.015591254 | 0                   | 0           |  |
| MBD1 MBD1       | 4148.997192   | 4766.169755         | 6250.883127 |  |
| 4999.425654     |               |                     |             |  |
| PDCD2 PDCD2     | 5697.550069   | 6809.539358         | 5374.991633 |  |
| 6092.0778       |               |                     |             |  |
| PI4KA PI4KA     | 8178.514511   | 5945.271201         | 5333.027413 |  |
| 6355.106229     |               |                     |             |  |
| ARHGAP23        | ARHGAP23      | 33.96976809         | 43.67042392 |  |
| 24.10710533     | 17.91233027   |                     |             |  |
| SPON2 SPON2     | 15.22782708   | 13.2026863          | 12.49998054 |  |
| 13.19855915     |               |                     |             |  |
| C7orf43 C7orf43 | 559.9154878   | 156.4010531         | 258.0353126 |  |
| 298.8530892     |               |                     |             |  |
| STAT2 STAT2     | 9841.861776   | 9311.956208         | 16983.90213 |  |
| 12995.86699     |               |                     |             |  |
| ST5 ST5         | 21.08468364   | 47.73278894         | 54.46420093 |  |
| 10.37029647     |               |                     |             |  |
| MTHFD1L MTHFD1L | 3001.053305   | 4029.866096         | 2608.031655 |  |
| 3117.688221     |               |                     |             |  |
| COMT COMT       | 4004.918521   | 5162.250344         | 3291.959161 |  |
| 3376.945633     |               |                     |             |  |
| COMMD2 COMMD2   | 2191.635727   | 2183.521196         | 2541.067473 |  |
| 2473.787086     |               |                     |             |  |
| ATPIF1 ATPIF1   | 8132.831029   | 9415.546516         | 7156.238861 |  |
| 6574.767963     |               |                     |             |  |
| MIR548AN        | MIR548AN      | 0 0                 | 2.678567259 |  |
| 4.713771124     |               |                     |             |  |
| MIR4534 MIR4534 | 0 0           | 0 0.942754225       |             |  |
| RAB11FIP2       | RAB11FIP2     | 387.7239048         | 386.9402678 |  |
| 836.6058406     | 822.081684    |                     |             |  |
| ITSN2 ITSN2     | 5585.098423   | 5395.836333         | 7841.952079 |  |
| 7121.565413     |               |                     |             |  |
| STK38L STK38L   | 2391.940222   | 2275.94 2083.032472 | 2022.207812 |  |
| FAM3C FAM3C     | 2088.555052   | 1831.111031         | 1462.497723 |  |
| 1826.114933     |               |                     |             |  |
| NSA2 NSA2       | 2320.486572   | 2854.827015         | 2270.53218  |  |
| 2225.842725     |               |                     |             |  |
| ANAPC10 ANAPC10 | 1819.13965    | 1841.266944         | 1628.568894 |  |
| 1661.132944     |               |                     |             |  |
| SFRP1 SFRP1     | 3.51411394    | 0 0                 | 0           |  |
| TMUB2 TMUB2     | 2001.873575   | 1936.732521         | 2325.889237 |  |
| 2264.495648     |               |                     |             |  |
| TDP1 TDP1       | 6030.219522   | 7449.361848         | 5176.777656 |  |

|             |          |             |             |   |             |
|-------------|----------|-------------|-------------|---|-------------|
| 4835.386419 |          |             |             |   |             |
| DDC         | DDC      | 8.199599194 | 10.15591254 | 0 | 5.656525348 |
| HIP1        | HIP1     | 298.6996849 | 394.0494066 |   | 166.9640258 |
| 174.4095316 |          |             |             |   |             |
| INPP5F      | INPP5F   | 1857.794903 | 1746.816957 |   | 1655.354566 |
| 1858.168577 |          |             |             |   |             |
| DNAH7       | DNAH7    | 2.342742627 | 5.07795627  |   | 8.035701777 |
| 2.828262674 |          |             |             |   |             |
| PRDM6       | PRDM6    | 0           | 1.015591254 | 0 | 4.713771124 |
| FGFR10P2    | FGFR10P2 |             | 4140.797593 |   | 4280.717136 |
| 5898.205105 |          | 4752.424047 |             |   |             |
| MCF2        | MCF2     | 4.685485254 | 0           | 0 | 0.942754225 |
| C6orf89     | C6orf89  | 5945.880787 | 6285.494271 |   | 5558.027063 |
| 5101.24311  |          |             |             |   |             |
| TBC1D4      | TBC1D4   | 3865.525334 | 3568.787667 |   | 3348.209074 |
| 5682.922467 |          |             |             |   |             |
| MAP3K7CL    | MAP3K7CL |             | 141.7359289 |   | 124.9177242 |
| 328.5709171 |          | 188.5508449 |             |   |             |
| STK24       | STK24    | 14097.45376 | 14078.12596 |   | 10328.55535 |
| 12138.9034  |          |             |             |   |             |
| NBL1        | NBL1     | 559.9154878 | 373.7375815 |   | 835.7129848 |
| 522.2858405 |          |             |             |   |             |
| POLE2       | POLE2    | 2116.667963 | 2094.149166 |   | 828.5701388 |
| 1214.267441 |          |             |             |   |             |
| ELF4        | ELF4     | 2216.234525 | 1591.431495 |   | 1024.998404 |
| 1660.19019  |          |             |             |   |             |
| ELAVL1      | ELAVL1   | 9366.285022 | 9135.24333  |   | 6308.025895 |
| 6953.755161 |          |             |             |   |             |
| HMGCL       | HMGCL    | 2015.93003  | 2558.274369 |   | 1939.282696 |
| 1827.057688 |          |             |             |   |             |
| NPAS3       | NPAS3    | 1.171371313 | 0           | 0 | 0           |
| RASSF8      | RASSF8   | 3.51411394  | 8.124730032 |   | 19.64282657 |
| 30.16813519 |          |             |             |   |             |
| PUM1        | PUM1     | 7486.234064 | 9225.630952 |   | 10798.19748 |
| 9865.922962 |          |             |             |   |             |
| BCL2L11     | BCL2L11  | 4063.487086 | 2007.823909 |   | 2473.210436 |
| 3376.945633 |          |             |             |   |             |
| TADA1       | TADA1    | 1703.17389  | 2075.868523 |   | 2549.103175 |
| 2582.203821 |          |             |             |   |             |
| CNTR0B      | CNTR0B   | 2598.101573 | 3242.782874 |   | 2380.353438 |
| 2001.467219 |          |             |             |   |             |
| CASZ1       | CASZ1    | 373.667449  | 140.1515931 |   | 237.4996303 |
| 363.9031307 |          |             |             |   |             |
| C1orf35     | C1orf35  | 1136.230174 | 1486.825596 |   | 1464.283435 |
| 1215.210196 |          |             |             |   |             |
| CPA3        | CPA3     | 0           | 5.357134518 | 0 |             |
| PTK7        | PTK7     | 90.19559114 | 29.45214637 |   | 4.464278765 |
| 50.90872813 |          |             |             |   |             |
| TRAIP       | TRAIP    | 1589.550872 | 1600.571816 |   | 746.4274095 |
| 827.7382093 |          |             |             |   |             |

|             |          |             |             |             |
|-------------|----------|-------------|-------------|-------------|
| SF3A1       | SF3A1    | 7724.022441 | 4806.793405 | 5353.563095 |
| 5155.922855 |          |             |             |             |
| SMNDC1      | SMNDC1   | 1603.607328 | 1266.442294 | 1346.426476 |
| 1441.47121  |          |             |             |             |
| SAP18       | SAP18    | 8747.800969 | 9153.523973 | 11108.91128 |
| 9699.998218 |          |             |             |             |
| FHL1        | FHL1     | 237.7883766 | 449.9069255 | 1020.534126 |
| 999.3194782 |          |             |             |             |
| CELF6       | CELF6    | 4.685485254 | 1.015591254 | 37.49994163 |
| 17.91233027 |          |             |             |             |
| PARVB       | PARVB    | 871.5002572 | 431.626283  | 223.2139383 |
| 279.9980047 |          |             |             |             |
| LLGL2       | LLGL2    | 759.0486111 | 868.3305222 | 881.2486282 |
| 1265.17617  |          |             |             |             |
| SYK         | SYK      | 91.36696245 | 7.109138778 | 41.07136464 |
| 67.87830418 |          |             |             |             |
| VARS2       | VARS2    | 32.79839678 | 0           | 58.45076193 |
| SRPX        | SRPX     | 0           | 3.046773762 | 0           |
| PALLD       | PALLD    | 440.4356139 | 55.85751897 | 83.92844078 |
| 251.715378  |          |             |             |             |
| YY1AP1      | YY1AP1   | 4631.602173 | 5659.890059 | 4280.35048  |
| 5059.761924 |          |             |             |             |
| EIF4E3      | EIF4E3   | 5990.392897 | 4737.7332   | 6071.419121 |
| 6495.576608 |          |             |             |             |
| TMEM256     | TMEM256  | 1204.16971  | 1156.758438 | 771.4273706 |
| 877.7041832 |          |             |             |             |
| MEIOB       | MEIOB    | 14.05645576 | 10.15591254 | 4.464278765 |
| 6.599279573 |          |             |             |             |
| ZNF805      | ZNF805   | 400.6089892 | 308.7397412 | 899.1057433 |
| 750.4323629 |          |             |             |             |
| EML4        | EML4     | 9755.180298 | 8390.814941 | 7370.524241 |
| 9438.855298 |          |             |             |             |
| CREBZF      | CREBZF   | 4290.733121 | 2615.147479 | 5399.098739 |
| 5571.677468 |          |             |             |             |
| LINS        | LINS     | 1605.950071 | 1221.756279 | 3310.709132 |
| 3090.348349 |          |             |             |             |
| MMP28       | MMP28    | 2.342742627 | 0           | 24.99996108 |
| 18.85508449 |          |             |             |             |
| MIR124-1    | MIR124-1 | 0           | 1.015591254 | 0           |
| MIR15B      | MIR15B   | 3.51411394  | 2.031182508 | 0.892855753 |
| 0.942754225 |          |             |             |             |
| MIRLET7G    | MIRLET7G | 0           | 1.015591254 | 0.892855753 |
| 3.771016899 |          |             |             |             |
| MIR941-3    | MIR941-3 | 0           | 1.015591254 | 0           |
| 2.828262674 |          |             |             |             |
| SRRT        | SRRT     | 11461.8683  | 13284.94919 | 9852.663235 |
| 8619.601877 |          |             |             |             |
| CDK20       | CDK20    | 40.99799597 | 44.68601518 | 380.3565508 |
| 355.4183427 |          |             |             |             |
| PCSK1       | PCSK1    | 0           | 2.031182508 | 8.035701777 |
| 0           |          |             |             | 0           |
| PAX3        | PAX3     | 0           | 0           | 1.885508449 |



|             |             |             |             |             |             |
|-------------|-------------|-------------|-------------|-------------|-------------|
| ADAM21P1    | ADAM21P1    | 0           | 0           | 0.892855753 |             |
| 0.942754225 |             |             |             |             |             |
| SF3B2       | SF3B2       | 11426.72716 | 10828.23395 | 10222.30552 |             |
| 9524.645932 |             |             |             |             |             |
| IMMT        | IMMT        | 12751.54812 | 14693.57426 | 10801.7689  |             |
| 12311.42742 |             |             |             |             |             |
| METAP2      | METAP2      | 3927.608014 | 3819.638706 | 3302.67343  |             |
| 3767.245882 |             |             |             |             |             |
| RAB32       | RAB32       | 182.7339249 | 26.40537261 | 0           | 96.16093092 |
| CAPN15      | CAPN15      | 2003.044946 | 743.412798  | 528.5706058 |             |
| 720.2642277 |             |             |             |             |             |
| ALDH6A1     | ALDH6A1     | 1507.55488  | 1731.583088 | 1316.06938  |             |
| 1976.012855 |             |             |             |             |             |
| XIRP2       | XIRP2       | 1.171371313 | 0           | 0           |             |
| GTF2H3      | GTF2H3      | 2297.059146 | 1838.22017  | 1705.354488 |             |
| 1666.789469 |             |             |             |             |             |
| HIST2H2BE   | HIST2H2BE   |             | 178.0484396 | 191.946747  |             |
| 499.9992217 | 530.7706285 |             |             |             |             |
| ATXN2       | ATXN2       | 2113.153849 | 1940.794886 | 2133.032394 |             |
| 2385.168189 |             |             |             |             |             |
| SEMA4G      | SEMA4G      | 394.7521326 | 492.5617582 | 492.8563757 |             |
| 472.3198666 |             |             |             |             |             |
| SH2D2A      | SH2D2A      | 5615.554077 | 7408.738198 | 3996.422351 |             |
| 5770.598609 |             |             |             |             |             |
| ID1         | ID1         | 38.65525334 | 19.29623383 | 33.92851862 |             |
| 19.79783872 |             |             |             |             |             |
| SLX1B       | SLX1B       | 105.4234182 | 95.46557788 | 143.7497762 |             |
| 94.27542247 |             |             |             |             |             |
| CLYBL       | CLYBL       | 105.4234182 | 154.3698706 | 290.1781197 |             |
| 217.7762259 |             |             |             |             |             |
| HDAC4       | HDAC4       | 884.3853417 | 507.795627  | 906.2485893 |             |
| 889.0172339 |             |             |             |             |             |
| MEF2D       | MEF2D       | 2431.766847 | 1645.257832 | 2101.782443 |             |
| 2272.980436 |             |             |             |             |             |
| TNRC6A      | TNRC6A      | 973.4095615 | 531.1542259 | 945.5342425 |             |
| 724.9779988 |             |             |             |             |             |
| ILF3        | ILF3        | 12778.48966 | 10581.44528 | 7603.559593 |             |
| 9751.8497   |             |             |             |             |             |
| MID2        | MID2        | 162.8206126 | 258.9757698 | 815.1773025 |             |
| 957.8382923 |             |             |             |             |             |
| MGAT4A      | MGAT4A      | 4563.662637 | 3212.315137 | 6369.632942 |             |
| 6152.41407  |             |             |             |             |             |
| MLYCD       | MLYCD       | 965.2099623 | 1414.718617 | 1177.676738 |             |
| 1124.70579  |             |             |             |             |             |
| PTGR1       | PTGR1       | 3.51411394  | 40.62365016 | 18.74997081 | 0           |
| KIN         | KIN         | 935.9256795 | 962.7805088 | 1402.676388 |             |
| 1038.915156 |             |             |             |             |             |
| SIRT4       | SIRT4       | 46.85485254 | 66.01343151 | 222.3210825 |             |
| 137.6421168 |             |             |             |             |             |
| GNLY        | GNLY        | 4452.382362 | 406.2365016 | 1614.283201 |             |

|             |          |             |             |             |             |
|-------------|----------|-------------|-------------|-------------|-------------|
| 1536.689386 |          |             |             |             |             |
| BEX2        | BEX2     | 146.4214142 | 171.6349219 | 1837.49714  |             |
| 1122.820282 |          |             |             |             |             |
| TTC16       | TTC16    | 90.19559114 | 56.87311023 | 107.1426904 |             |
| 77.30584643 |          |             |             |             |             |
| ZNF550      | ZNF550   | 673.5385052 | 594.1208836 | 2211.6037   |             |
| 1535.746632 |          |             |             |             |             |
| HSP90AB1    | HSP90AB1 |             | 64037.69834 | 79043.4673  |             |
| 88282.89829 |          | 79676.8733  |             |             |             |
| HOMER1      | HOMER1   | 168.6774691 | 153.3542794 | 208.0353905 |             |
| 200.8066499 |          |             |             |             |             |
| ZNF620      | ZNF620   | 387.7239048 | 411.3144579 | 384.8208296 |             |
| 311.1088942 |          |             |             |             |             |
| ATF7IP2     | ATF7IP2  | 705.1655307 | 616.4638912 | 568.7491147 |             |
| 715.5504566 |          |             |             |             |             |
| SDHD        | SDHD     | 7923.155564 | 9091.572906 | 9068.735884 |             |
| 8530.982979 |          |             |             |             |             |
| KLHL13      | KLHL13   | 56.22582305 | 29.45214637 | 49.99992217 |             |
| 135.7566084 |          |             |             |             |             |
| NLRC3       | NLRC3    | 9896.916227 | 7382.332826 | 3851.779719 |             |
| 4236.737486 |          |             |             |             |             |
| DEF8        | DEF8     | 1238.139478 | 1988.527675 | 1811.604323 |             |
| 1563.086505 |          |             |             |             |             |
| NRF1        | NRF1     | 2242.004694 | 2451.637287 | 2908.924043 |             |
| 2038.234634 |          |             |             |             |             |
| CACNA1F     | CACNA1F  | 19.91331233 | 6.093547524 | 17.85711506 |             |
| 22.62610139 |          |             |             |             |             |
| TENC1       | TENC1    | 26.94154021 | 36.56128515 | 120.5355267 |             |
| 108.4167358 |          |             |             |             |             |
| LDLRAD4     | LDLRAD4  | 1541.524649 | 2164.224962 | 1533.926184 |             |
| 1663.961207 |          |             |             |             |             |
| TMEM91      | TMEM91   | 187.4194102 | 287.4123249 | 281.2495622 |             |
| 242.2878358 |          |             |             |             |             |
| ZGLP1       | ZGLP1    | 19.91331233 | 10.15591254 | 75.89273901 |             |
| 68.8210584  |          |             |             |             |             |
| HNRNPF      | HNRNPF   | 31851.92876 | 33910.59197 | 26216.92348 |             |
| 30258.6396  |          |             |             |             |             |
| LOXHD1      | LOXHD1   | 1.171371313 | 0           | 0           | 0           |
| FOXP2       | FOXP2    | 3.51411394  | 1.015591254 | 23.21424958 | 0           |
| DDR1        | DDR1     | 1.171371313 | 0           | 0           | 3.771016899 |
| UBE3A       | UBE3A    | 6503.453532 | 5978.785713 | 7268.738685 |             |
| 7640.080237 |          |             |             |             |             |
| USP50       | USP50    | 24.59879758 | 20.31182508 | 16.96425931 |             |
| 37.71016899 |          |             |             |             |             |
| KEAP1       | KEAP1    | 9187.065211 | 12928.47666 | 9402.663935 |             |
| 7710.786804 |          |             |             |             |             |
| PCDH9       | PCDH9    | 15.22782708 | 8.124730032 | 3.571423012 |             |
| 25.45436407 |          |             |             |             |             |
| DGCR5       | DGCR5    | 2.342742627 | 5.07795627  | 9.821413283 |             |
| 10.37029647 |          |             |             |             |             |

|             |             |             |             |             |
|-------------|-------------|-------------|-------------|-------------|
| FSD2        | FSD2        | 125.3367305 | 143.1983668 | 174.1068718 |
| 211.1769463 |             |             |             |             |
| CNEP1R1     | CNEP1R1     | 2203.349441 | 1977.356172 | 2115.175279 |
| 2069.345523 |             |             |             |             |
| MRFAP1      | MRFAP1      | 4630.430802 | 4838.276734 | 6574.989765 |
| 6188.238731 |             |             |             |             |
| PGAP3       | PGAP3       | 712.1937586 | 903.8762161 | 1333.926495 |
| 860.7346072 |             |             |             |             |
| NPHP4       | NPHP4       | 562.2582305 | 567.715511  | 245.5353321 |
| 475.1481293 |             |             |             |             |
| SAR1A       | SAR1A       | 4878.761521 | 4907.33694  | 6510.704151 |
| 5494.371622 |             |             |             |             |
| THAP10      | THAP10      | 0           | 10.15591254 | 17.85711506 |
|             |             |             |             | 25.45436407 |
| PRSS23      | PRSS23      | 654.7965642 | 634.7445338 | 253.5710339 |
| 154.6116929 |             |             |             |             |
| KRT23       | KRT23       | 0           | 1.015591254 | 0           |
|             |             |             |             | 0           |
| PNLDC1      | PNLDC1      | 14.05645576 | 6.093547524 | 16.96425931 |
| 22.62610139 |             |             |             |             |
| ZNF138      | ZNF138      | 655.9679355 | 599.1988399 | 1008.034145 |
| 887.1317255 |             |             |             |             |
| WNT6        | WNT6        | 0           | 1.015591254 | 8.035701777 |
|             |             |             |             | 1.885508449 |
| BUB1        | BUB1        | 15962.27689 | 15683.77574 | 3819.636911 |
| 7038.603042 |             |             |             |             |
| GLS2        | GLS2        | 52.71170911 | 99.5279429  | 999.1055876 |
| 510.0300356 |             |             |             |             |
| FAM103A1    | FAM103A1    |             | 1366.990323 | 2164.224962 |
| 1572.318981 | 1464.097311 |             |             |             |
| PPIL2       | PPIL2       | 5555.81414  | 6467.285106 | 5202.670473 |
| 4747.710276 |             |             |             |             |
| H2AFJ       | H2AFJ       | 1412.673804 | 1638.148693 | 892.855753  |
| 874.8759205 |             |             |             |             |
| KCTD20      | KCTD20      | 11468.89653 | 11411.18333 | 6635.703957 |
| 7698.530999 |             |             |             |             |
| LINC00971   | LINC00971   |             | 0           | 0           |
| 3.771016899 |             |             |             | 7.142846024 |
| ARHGEF26    | ARHGEF26    |             | 8.199599194 | 9.140321286 |
| 59.82133545 | 32.05364364 |             |             |             |
| KIFC1       | KIFC1       | 31.62702546 | 53.82633646 | 33.92851862 |
| 9.427542247 |             |             |             |             |
| BRE         | BRE         | 2805.434296 | 4046.115556 | 2691.06724  |
| 2929.137376 |             |             |             |             |
| ZNF195      | ZNF195      | 1390.417749 | 1503.075056 | 2106.246721 |
| 2036.349125 |             |             |             |             |
| B3GNT9      | B3GNT9      | 705.1655307 | 760.6778493 | 592.85622   |
| 417.6401215 |             |             |             |             |
| UCP1        | UCP1        | 2.342742627 | 0           | 0           |
|             |             |             | 0           | 0           |
| HES4        | HES4        | 7.028227881 | 2.031182508 | 34.82137437 |
| 12.25580492 |             |             |             |             |
| KCNN3       | KCNN3       | 1.171371313 | 2.031182508 | 39.28565313 |
| 10.37029647 |             |             |             |             |

|             |             |             |             |             |
|-------------|-------------|-------------|-------------|-------------|
| GAR1        | GAR1        | 1773.456169 | 1462.451406 | 913.3914353 |
| 1196.355111 |             |             |             |             |
| ODF2        | ODF2        | 6154.384881 | 6911.098484 | 4538.385793 |
| 4944.745909 |             |             |             |             |
| ARHGDI      | ARHGDI      | 11808.59421 | 7632.168274 | 4337.493248 |
| 4516.735491 |             |             |             |             |
| ABCB9       | ABCB9       | 67.93953618 | 116.7929942 | 166.9640258 |
| 82.01961755 |             |             |             |             |
| CINP        | CINP        | 1571.980303 | 1935.71693  | 1429.462061 |
| 1381.134939 |             |             |             |             |
| LNx1        | LNx1        | 79.65324932 | 50.7795627  | 100.8927001 |
| 148.0124133 |             |             |             |             |
| PSMB8-AS1   | PSMB8-AS1   | 0           | 2.031182508 | 2.678567259 |
| 0           |             |             |             |             |
| CNDP2       | CNDP2       | 8334.306895 | 10394.57649 | 10392.84097 |
| 10666.3213  |             |             |             |             |
| RUNDC3A     | RUNDC3A     | 2.342742627 | 3.046773762 | 13.3928363  |
| 1.885508449 |             |             |             |             |
| RUSC2       | RUSC2       | 90.19559114 | 189.9155645 | 180.3568621 |
| 137.6421168 |             |             |             |             |
| TNFSF4      | TNFSF4      | 358.4396219 | 664.1966801 | 1669.640258 |
| 875.8186748 |             |             |             |             |
| MY09B       | MY09B       | 5018.154707 | 3169.660304 | 2938.388283 |
| 2767.926404 |             |             |             |             |
| CBWD6       | CBWD6       | 79.65324932 | 73.12257029 | 141.9640647 |
| 83.905126   |             |             |             |             |
| TUBA8       | TUBA8       | 48.02622385 | 41.63924142 | 89.2855753  |
| 75.42033798 |             |             |             |             |
| RPS12       | RPS12       | 7479.205836 | 6493.690478 | 13455.3362  |
| 10485.31249 |             |             |             |             |
| STRA6       | STRA6       | 0           | 16.24946006 | 4.464278765 |
| KIAA1522    | KIAA1522    | 0           | 4.685485254 | 5.656525348 |
| 8.92855753  | 16.02682182 |             |             | 14.21827756 |
| PREPL       | PREPL       | 2496.192269 | 1831.111031 | 3713.387077 |
| 4643.064557 |             |             |             |             |
| CCPG1       | CCPG1       | 2063.956254 | 2174.380875 | 2809.817055 |
| 2872.572123 |             |             |             |             |
| ELOVL5      | ELOVL5      | 13182.61276 | 12961.99118 | 8849.093368 |
| 10676.69159 |             |             |             |             |
| CCR9        | CCR9        | 0           | 84.29407409 | 16.07140355 |
| KPTN        | KPTN        | 552.88726   | 622.5574387 | 73.53482953 |
| 365.7886392 |             |             |             | 153.5711895 |
| CACNA1G     | CACNA1G     | 0           | 0           | 0.892855753 |
| USP43       | USP43       | 1.171371313 | 4.062365016 | 0           |
| 16.96957604 |             |             |             | 19.64282657 |
| CD2         | CD2         | 29962.50683 | 32858.43943 | 18616.93531 |
| 27314.41815 |             |             |             |             |
| DDX56       | DDX56       | 5574.556081 | 9156.570747 | 7651.773803 |
| 6536.11504  |             |             |             |             |
| SLC35G1     | SLC35G1     | 270.5867734 | 266.0849086 | 173.2140161 |

|             |           |             |             |             |             |
|-------------|-----------|-------------|-------------|-------------|-------------|
| 191.3791076 |           |             |             |             |             |
| PXK         | PXK       | 2630.89997  | 2761.39262  | 1952.675532 |             |
| 2616.142974 |           |             |             |             |             |
| CTBP2       | CTBP2     | 11.71371313 | 2.031182508 | 22.32139383 |             |
| 35.82466054 |           |             |             |             |             |
| SLC1A3      | SLC1A3    | 1.171371313 | 14.21827756 | 2.678567259 | 0           |
| NODAL       | NODAL     | 2.342742627 | 11.17150379 | 0           | 16.02682182 |
| CADPS2      | CADPS2    | 0           | 0           | 0.942754225 |             |
| CENPU       | CENPU     | 4663.229199 | 4662.579447 | 2284.817872 |             |
| 2876.34314  |           |             |             |             |             |
| GSN         | GSN       | 309.2420268 | 295.5370549 | 305.3566675 |             |
| 324.3074533 |           |             |             |             |             |
| SHOX2       | SHOX2     | 1.171371313 | 0           | 0           | 0.942754225 |
| BCAT1       | BCAT1     | 3519.970797 | 461.0784293 | 539.2848748 |             |
| 3058.294705 |           |             |             |             |             |
| LOX         | LOX       | 2.342742627 | 3.046773762 | 8.92855753  |             |
| 1.885508449 |           |             |             |             |             |
| KIFAP3      | KIFAP3    | 2703.524991 | 3600.270996 | 2973.209658 |             |
| 2553.921195 |           |             |             |             |             |
| STAT6       | STAT6     | 5856.856567 | 4284.779501 | 10120.51996 |             |
| 10376.89575 |           |             |             |             |             |
| FAM185A     | FAM185A   | 363.1251072 | 383.893494  | 312.4995136 |             |
| 454.4075363 |           |             |             |             |             |
| CDK1        | CDK1      | 12174.06206 | 13191.5148  | 5186.599069 |             |
| 8412.195947 |           |             |             |             |             |
| ZFY         | ZFY       | 1386.903635 | 0           | 0           | 1382.077693 |
| SLC35C1     | SLC35C1   | 1208.855195 | 1664.554065 | 1445.533464 |             |
| 1226.523246 |           |             |             |             |             |
| NT5C3A      | NT5C3A    | 2703.524991 | 2727.878108 | 4504.457274 |             |
| 3326.979659 |           |             |             |             |             |
| KRT72       | KRT72     | 0           | 0           | 7.542033798 |             |
| IL1R2       | IL1R2     | 188.5907815 | 1781.34706  | 702.6774776 |             |
| 600.5344411 |           |             |             |             |             |
| FNTA        | FNTA      | 5694.035955 | 6989.29901  | 7115.167496 |             |
| 5785.682677 |           |             |             |             |             |
| FAM131B     | FAM131B   | 22.25605496 | 5.07795627  | 34.82137437 |             |
| 30.16813519 |           |             |             |             |             |
| JADE1       | JADE1     | 2598.101573 | 2649.677582 | 5660.705474 |             |
| 4187.714266 |           |             |             |             |             |
| CEBPA       | CEBPA     | 70.28227881 | 124.9177242 | 80.35701777 |             |
| 47.13771124 |           |             |             |             |             |
| LINC00518   | LINC00518 |             | 0           | 0           | 4.713771124 |
| TCTEX1D4    | TCTEX1D4  |             | 146.4214142 | 253.8978135 |             |
| 414.2850694 |           |             |             |             |             |
| ADAMTSL2    | ADAMTSL2  |             | 0           | 0           | 9.821413283 |
| 20.74059294 |           |             |             |             |             |
| KDF1        | KDF1      | 1.171371313 | 0           | 105.3569789 | 33.93915209 |
| LMF1        | LMF1      | 312.7561407 | 263.0381348 | 681.2489396 |             |
| 813.5968959 |           |             |             |             |             |
| LOC645513   | LOC645513 |             | 469.7198967 | 407.2520929 |             |

|                 |             |             |             |             |
|-----------------|-------------|-------------|-------------|-------------|
| 595.5347873     | 583.5648651 |             |             |             |
| CCNT2-AS1       | CCNT2-AS1   | 43.3407386  | 83.27848283 |             |
| 95.53556557     | 44.30944856 |             |             |             |
| LINC00940       | LINC00940   | 3.51411394  | 0           | 0           |
| MIR4687 MIR4687 | 224.9032922 | 179.759652  | 141.071209  | 0           |
| 144.2413964     |             |             |             |             |
| MIR4685 MIR4685 | 11.71371313 | 14.21827756 | 8.035701777 |             |
| 23.56885562     |             |             |             |             |
| MIR4681 MIR4681 | 2.342742627 | 0           | 0           | 0.942754225 |
| MIR4680 MIR4680 | 536.4880616 | 607.3235699 | 2408.031966 |             |
| 2272.037682     |             |             |             |             |
| MIR6508 MIR6508 | 1.171371313 | 0           | 0           | 0           |
| RARS2 RARS2     | 2266.603492 | 2556.243186 | 2421.424802 |             |
| 2488.871153     |             |             |             |             |
| BIVM BIVM       | 2209.206297 | 1668.61643  | 837.4986963 |             |
| 1205.782653     |             |             |             |             |
| PCDHB10 PCDHB10 | 0           | 0           | 8.484788022 |             |
| PCDHGC5 PCDHGC5 | 0           | 14.21827756 | 9.821413283 | 12.25580492 |
| FLJ46906        | FLJ46906    | 10.54234182 | 5.07795627  |             |
| 10.71426904     | 4.713771124 |             |             |             |
| GABRB3 GABRB3   | 4.685485254 | 0           | 0           | 17.91233027 |
| NFATC1 NFATC1   | 4134.940737 | 3281.375342 | 4953.563718 |             |
| 4828.787139     |             |             |             |             |
| HJURP HJURP     | 6815.038302 | 8712.757368 | 2625.88877  |             |
| 3923.743083     |             |             |             |             |
| EIF4E2 EIF4E2   | 7502.633263 | 8414.17354  | 5401.777306 |             |
| 4974.914044     |             |             |             |             |
| PABPC4 PABPC4   | 1274.451989 | 820.5977333 | 949.1056655 |             |
| 1022.888334     |             |             |             |             |
| SLC01C1 SLC01C1 | 0           | 0           | 3.571423012 | 0           |
| CXorf56 CXorf56 | 818.7885481 | 880.5176173 | 1174.998171 |             |
| 1022.888334     |             |             |             |             |
| SLC14A1 SLC14A1 | 19.91331233 | 71.09138778 | 17.85711506 |             |
| 38.65292321     |             |             |             |             |
| SLC23A3 SLC23A3 | 25.7701689  | 16.24946006 | 48.21421066 |             |
| 2.828262674     |             |             |             |             |
| RHBDD2 RHBDD2   | 4737.025592 | 7783.491371 | 7760.702205 |             |
| 5678.208695     |             |             |             |             |
| TRPC4AP TRPC4AP | 10776.61608 | 12631.92402 | 9087.485854 |             |
| 10182.68838     |             |             |             |             |
| NOP10 NOP10     | 8122.288688 | 9699.912067 | 6131.240456 |             |
| 6746.349232     |             |             |             |             |
| DHRS1 DHRS1     | 541.1735468 | 762.7090318 | 549.1062881 |             |
| 668.4127453     |             |             |             |             |
| MICA MICA       | 133.5363297 | 157.4166444 | 283.9281295 |             |
| 170.6385147     |             |             |             |             |
| TAZ TAZ         | 2066.298997 | 2120.554538 | 1999.104031 |             |
| 2123.082514     |             |             |             |             |
| CCL17 CCL17     | 12.88508445 | 15.23386881 | 31.24995136 |             |
| 237.5740646     |             |             |             |             |

|             |             |             |             |             |
|-------------|-------------|-------------|-------------|-------------|
| CCL3        | CCL3        | 2924.91417  | 1475.654092 | 8035.701777 |
| 7422.304011 |             |             |             |             |
| SMARCE1     | SMARCE1     | 9176.52287  | 11336.02958 | 7972.309019 |
| 8588.490987 |             |             |             |             |
| XYLB        | XYLB        | 419.3509302 | 385.9246765 | 217.8568037 |
| 289.425547  |             |             |             |             |
| PLCH2       | PLCH2       | 62.08267961 | 31.48332888 | 111.6069691 |
| 102.7602105 |             |             |             |             |
| MFGE8       | MFGE8       | 426.3791581 | 205.1494333 | 318.7495038 |
| 183.8370738 |             |             |             |             |
| SRPK3       | SRPK3       | 11.71371313 | 0           | 1.785711506 |
| 2.828262674 |             |             |             |             |
| TM9SF3      | TM9SF3      | 11569.63446 | 9151.49279  | 9347.306878 |
| 10615.41257 |             |             |             |             |
| SERHL2      | SERHL2      | 200.3044946 | 117.8085855 | 314.2852251 |
| 337.5060124 |             |             |             |             |
| N4BP2L2-IT2 | N4BP2L2-IT2 | 44.30944856 | 12.88508445 | 0           |
| 95.53556557 |             |             |             |             |
| PHLDB1      | PHLDB1      | 9.370970508 | 25.38978135 | 231.24964   |
| 97.10368515 |             |             |             |             |
| DUS3L       | DUS3L       | 3127.561407 | 4715.390193 | 3997.315206 |
| 2886.713436 |             |             |             |             |
| CYP2U1      | CYP2U1      | 404.1231031 | 440.7666043 | 824.9987158 |
| 572.2518144 |             |             |             |             |
| SLAIN1      | SLAIN1      | 3426.261092 | 4146.65909  | 3311.601988 |
| 3491.018894 |             |             |             |             |
| ZNRD1       | ZNRD1       | 1331.849183 | 0           | 0           |
| 1269.889941 |             |             |             |             |
| ULK3        | ULK3        | 4990.041795 | 4491.960117 | 3049.995252 |
| 4731.683454 |             |             |             |             |
| CYFIP2      | CYFIP2      | 28522.89148 | 32757.8959  | 28812.45515 |
| 28353.33331 |             |             |             |             |
| LIMS1       | LIMS1       | 7750.963981 | 6582.046918 | 2749.995719 |
| 6102.448097 |             |             |             |             |
| SSPN        | SSPN        | 0           | 0           | 4.713771124 |
| 4.713771124 |             |             |             |             |
| AOC2        | AOC2        | 58.56856567 | 33.51451138 | 47.32135491 |
| 31.11088942 |             |             |             |             |
| MY06        | MY06        | 175.705697  | 222.4144846 | 371.4279933 |
| 399.7277913 |             |             |             |             |
| ST20        | ST20        | 373.667449  | 477.3278894 | 303.570956  |
| 321.4791906 |             |             |             |             |
| PRR4        | PRR4        | 26.94154021 | 31.48332888 | 66.96418148 |
| 40.53843166 |             |             |             |             |
| AC02        | AC02        | 13084.21757 | 19529.81982 | 12419.62352 |
| 11564.76607 |             |             |             |             |
| MIRLET7B    | MIRLET7B    |             | 0           | 0           |
| 1.785711506 |             |             |             |             |
| POU5F1      | POU5F1      | 4.685485254 | 2.031182508 | 0           |
| 0.942754225 |             |             |             |             |
| LST1        | LST1        | 4.685485254 | 4.062365016 | 1.785711506 |
| 5.656525348 |             |             |             |             |
| SCIMP       | SCIMP       | 31.62702546 | 14.21827756 | 49.10706642 |
| 23.56885562 |             |             |             |             |
| RSRC1       | RSRC1       | 1012.064815 | 1071.448773 | 867.8557919 |

|             |         |             |             |             |             |  |
|-------------|---------|-------------|-------------|-------------|-------------|--|
| 845.6505396 |         |             |             |             |             |  |
| GCSAML      | GCSAML  | 5.856856567 | 3.046773762 | 0           | 19.79783872 |  |
| LFNG        | LFNG    | 240.1311193 | 410.2988666 | 36.60708587 |             |  |
| 116.9015239 |         |             |             |             |             |  |
| TNRC6B      | TNRC6B  | 3194.329572 | 2527.806631 | 3936.601015 |             |  |
| 4031.217065 |         |             |             |             |             |  |
| PRKAG2      | PRKAG2  | 1240.482221 | 1113.088014 | 2325.889237 |             |  |
| 1902.478025 |         |             |             |             |             |  |
| PPP1R18     | PPP1R18 | 1.171371313 | 0           | 0           | 0           |  |
| HOGA1       | HOGA1   | 0           | 1.015591254 | 0           | 0           |  |
| KCNQ3       | KCNQ3   | 7.028227881 | 0           | 5.357134518 | 0           |  |
| SEC61G      | SEC61G  | 4604.660633 | 4420.868729 | 3441.958928 |             |  |
| 3502.331945 |         |             |             |             |             |  |
| TMEM218     | TMEM218 | 1111.631376 | 1153.711665 | 902.6771663 |             |  |
| 925.7846487 |         |             |             |             |             |  |
| NBPF8       | NBPF8   | 589.1997707 | 411.3144579 | 639.2847192 |             |  |
| 662.75622   |         |             |             |             |             |  |
| CD33        | CD33    | 0           | 73.12257029 | 170.5354488 | 8.484788022 |  |
| LEKR1       | LEKR1   | 74.96776406 | 49.76397145 | 64.28561422 |             |  |
| 34.88190631 |         |             |             |             |             |  |
| UNG         | UNG     | 4970.128483 | 6566.813049 | 3966.065255 |             |  |
| 4487.51011  |         |             |             |             |             |  |
| FAM83D      | FAM83D  | 1939.790895 | 2042.354012 | 585.713374  |             |  |
| 1181.271044 |         |             |             |             |             |  |
| FIP1L1      | FIP1L1  | 5247.743484 | 6167.685686 | 5683.026868 |             |  |
| 5434.035351 |         |             |             |             |             |  |
| CHKA        | CHKA    | 990.9801312 | 1510.184195 | 942.8556752 |             |  |
| 728.7490157 |         |             |             |             |             |  |
| S1PR1       | S1PR1   | 14700.70998 | 14755.52533 | 9624.985018 |             |  |
| 9111.719582 |         |             |             |             |             |  |
| CHGA        | CHGA    | 1.171371313 | 0           | 11.60712479 | 0           |  |
| HLA-A       | HLA-A   | 104997.0391 | 88618.46165 | 115364.999  |             |  |
| 126174.4544 |         |             |             |             |             |  |
| SC01        | SC01    | 2316.972458 | 2906.622169 | 2459.8176   |             |  |
| 2129.681794 |         |             |             |             |             |  |
| KLHL41      | KLHL41  | 5.856856567 | 2.031182508 | 0           | 0.942754225 |  |
| EGR1        | EGR1    | 611.4558256 | 462.0940206 | 736.6059962 |             |  |
| 1172.786256 |         |             |             |             |             |  |
| GLRX        | GLRX    | 4662.057828 | 6976.096324 | 3423.208957 |             |  |
| 3569.267495 |         |             |             |             |             |  |
| RNH1        | RNH1    | 7449.921554 | 10911.51243 | 13626.7645  |             |  |
| 10556.96181 |         |             |             |             |             |  |
| SLC2A5      | SLC2A5  | 26.94154021 | 11.17150379 | 0           | 0           |  |
| RNF4        | RNF4    | 10711.01929 | 12537.47403 | 11899.08862 |             |  |
| 10391.97982 |         |             |             |             |             |  |
| SEMA3F      | SEMA3F  | 0           | 0           | 0           | 5.656525348 |  |
| EDN1        | EDN1    | 0           | 1.015591254 | 0           | 5.656525348 |  |
| GFAP        | GFAP    | 1.171371313 | 1.015591254 | 0.892855753 | 0           |  |
| PPP4R1      | PPP4R1  | 2176.4079   | 2207.895386 | 1390.176407 |             |  |
| 1738.43879  |         |             |             |             |             |  |



|             |             |             |             |             |             |
|-------------|-------------|-------------|-------------|-------------|-------------|
| CA7         | CA7         | 2.342742627 | 3.046773762 | 8.92855753  |             |
| 1.885508449 |             |             |             |             |             |
| CA3         | CA3         | 1.171371313 | 0           | 7.142846024 | 6.599279573 |
| TRMT6       | TRMT6       | 1359.962095 | 1875.797046 | 1715.175902 |             |
| 1752.580104 |             |             |             |             |             |
| AKAP1       | AKAP1       | 2543.047122 | 3422.542526 | 2925.888303 |             |
| 2724.559709 |             |             |             |             |             |
| GRAMD1B     | GRAMD1B     | 3001.053305 | 1763.066417 | 468.7492703 |             |
| 882.4179543 |             |             |             |             |             |
| ARNTL2      | ARNTL2      | 2954.198453 | 3830.81021  | 800.8916105 |             |
| 1115.278248 |             |             |             |             |             |
| HIPK3       | HIPK3       | 3314.980817 | 1875.797046 | 3549.101618 |             |
| 3688.997281 |             |             |             |             |             |
| AKT1S1      | AKT1S1      | 749.6776406 | 509.8268095 | 561.6062687 |             |
| 541.140925  |             |             |             |             |             |
| ZNF205      | ZNF205      | 33.96976809 | 34.53010264 | 28.5713841  |             |
| 25.45436407 |             |             |             |             |             |
| ADAM29      | ADAM29      | 3.51411394  | 0           | 0           | 3.771016899 |
| ZNF112      | ZNF112      | 0           | 0           | 1.885508449 |             |
| LOC401010   | LOC401010   |             | 10.54234182 | 14.21827756 |             |
| 3.571423012 | 13.19855915 |             |             |             |             |
| ZNF839      | ZNF839      | 578.6574288 | 550.4504597 | 775.8916494 |             |
| 660.8707115 |             |             |             |             |             |
| PTGS1       | PTGS1       | 10.54234182 | 25.38978135 | 0           | 0           |
| ATF2        | ATF2        | 5356.681016 | 4226.890799 | 4800.885384 |             |
| 5341.645437 |             |             |             |             |             |
| THSD1       | THSD1       | 0           | 7.109138778 | 33.03566286 | 0           |
| GAS2L1      | GAS2L1      | 224.9032922 | 53.82633646 | 40.17850889 |             |
| 91.4471598  |             |             |             |             |             |
| FXYP1       | FXYP1       | 11.71371313 | 11.17150379 | 8.035701777 |             |
| 9.427542247 |             |             |             |             |             |
| CCDC144CP   | CCDC144CP   |             | 3.51411394  | 5.07795627  | 0           |
| 4.713771124 |             |             |             |             |             |
| ICOSLG      | ICOSLG      | 350.2400227 | 380.8467203 | 250.8924666 |             |
| 176.29504   |             |             |             |             |             |
| IL1RAP      | IL1RAP      | 624.3409101 | 864.2681572 | 844.6415424 |             |
| 582.6221109 |             |             |             |             |             |
| MROH8       | MROH8       | 843.3873457 | 1143.555752 | 733.927429  |             |
| 685.3823214 |             |             |             |             |             |
| PDHA1       | PDHA1       | 4971.299854 | 7076.639858 | 5793.740981 |             |
| 6185.410468 |             |             |             |             |             |
| IFT22       | IFT22       | 431.0646434 | 420.4547792 | 361.60658   |             |
| 271.5132167 |             |             |             |             |             |
| LINC00669   | LINC00669   |             | 4.685485254 | 3.046773762 | 0           |
| 1.885508449 |             |             |             |             |             |
| M1AP        | M1AP        | 16.39919839 | 19.29623383 | 0           | 6.599279573 |
| EMC1        | EMC1        | 4020.146348 | 4595.550425 | 3836.601171 |             |
| 3470.278301 |             |             |             |             |             |
| FKBP6       | FKBP6       | 0           | 0           | 0.942754225 |             |
| TREX1       | TREX1       | 3186.129973 | 4369.073575 | 4212.493443 |             |

|             |          |             |             |             |             |
|-------------|----------|-------------|-------------|-------------|-------------|
| 3982.193845 |          |             |             |             |             |
| SCMH1       | SCMH1    | 734.4498135 | 695.680009  | 646.4275652 |             |
| 625.046051  |          |             |             |             |             |
| JKAMP       | JKAMP    | 4397.327911 | 4538.677314 | 3367.8519   |             |
| 3808.727068 |          |             |             |             |             |
| MED30       | MED30    | 1885.907815 | 2230.238394 | 2075.889626 |             |
| 1798.775061 |          |             |             |             |             |
| KCNB1       | KCNB1    | 5.856856567 | 0           | 1.785711506 | 0           |
| PIR-FIGF    | PIR-FIGF |             | 561.0868591 | 622.5574387 |             |
| 136.6069302 |          | 142.3558879 |             |             |             |
| IL17RC      | IL17RC   | 179.219811  | 139.1360018 | 327.6780614 |             |
| 313.9371568 |          |             |             |             |             |
| MYNN        | MYNN     | 2246.690179 | 1992.59004  | 2543.74604  |             |
| 2231.49925  |          |             |             |             |             |
| DDX39B      | DDX39B   | 1.171371313 | 3.046773762 | 0.892855753 |             |
| 2.828262674 |          |             |             |             |             |
| C21orf62    | C21orf62 |             | 4.685485254 | 0           | 8.92855753  |
| 16.96957604 |          |             |             |             |             |
| BEX4        | BEX4     | 503.6896648 | 627.635395  | 2450.889042 |             |
| 1946.787474 |          |             |             |             |             |
| RPEL1       | RPEL1    | 1.171371313 | 0           | 0.892855753 | 0.942754225 |
| IMPDH1      | IMPDH1   | 5648.352474 | 6460.175967 | 3176.780769 |             |
| 4141.519309 |          |             |             |             |             |
| TSP02       | TSP02    | 3.51411394  | 3.046773762 | 5.357134518 | 0           |
| ARAP1       | ARAP1    | 4826.049811 | 4400.556904 | 5080.349235 |             |
| 4436.601382 |          |             |             |             |             |
| PDE8B       | PDE8B    | 18.74194102 | 10.15591254 | 19.64282657 |             |
| 16.02682182 |          |             |             |             |             |
| SUC0        | SUC0     | 1776.970283 | 1326.362178 | 3141.959395 |             |
| 2612.371957 |          |             |             |             |             |
| C18orf54    | C18orf54 |             | 893.7563122 | 639.8224901 |             |
| 396.4279543 |          | 489.2894426 |             |             |             |
| ELAC1       | ELAC1    | 844.558717  | 1151.680482 | 1137.498229 |             |
| 1076.625325 |          |             |             |             |             |
| CCDC7       | CCDC7    | 215.5323217 | 150.3075056 | 247.3210436 |             |
| 215.8907175 |          |             |             |             |             |
| TSPAN5      | TSPAN5   | 3839.755166 | 3346.373182 | 2080.353905 |             |
| 2710.418396 |          |             |             |             |             |
| CNOT4       | CNOT4    | 1753.542856 | 1745.801366 | 2264.28219  |             |
| 2036.349125 |          |             |             |             |             |
| 1-Dec       | 1-Dec    | 5.856856567 | 0           | 0           | 4.713771124 |
| TMED9       | TMED9    | 4507.436814 | 8626.432112 | 6645.52537  |             |
| 6265.544577 |          |             |             |             |             |
| SHANK2      | SHANK2   | 0           | 0           | 0.892855753 | 3.771016899 |
| LRPPRC      | LRPPRC   | 8453.786769 | 9470.388444 | 9191.057122 |             |
| 8089.774002 |          |             |             |             |             |
| HSPA8       | HSPA8    | 115388.274  | 155262.5753 | 187199.7086 |             |
| 146594.5109 |          |             |             |             |             |
| IGF2BP3     | IGF2BP3  | 14.05645576 | 48.74838019 | 49.99992217 |             |
| 43.36669434 |          |             |             |             |             |

|                        |                        |             |             |             |   |
|------------------------|------------------------|-------------|-------------|-------------|---|
| GTDC1                  | GTDC1                  | 1547.381505 | 1404.562704 | 733.0345732 |   |
| 1085.110113            |                        |             |             |             |   |
| SYPL2                  | SYPL2                  | 0           | 3.046773762 | 0.892855753 | 0 |
| TMEM150A               | TMEM150A               |             | 159.3064986 | 223.4300759 |   |
| 583.9276625            |                        | 608.0764749 |             |             |   |
| EPN1                   | EPN1                   | 1060.091039 | 504.7488533 | 458.9278571 |   |
| 416.6973673            |                        |             |             |             |   |
| SKAP1                  | SKAP1                  | 5921.28199  | 6803.445811 | 3474.994591 |   |
| 5280.366413            |                        |             |             |             |   |
| ANKRD30B               | ANKRD30B               | 0           | 0           | 0.892855753 | 0 |
| PLEC                   | PLEC                   | 6195.382877 | 4668.672995 | 3516.065955 |   |
| 4889.123409            |                        |             |             |             |   |
| TAF1C                  | TAF1C                  | 1480.61334  | 828.7224633 | 938.3913964 |   |
| 1255.748627            |                        |             |             |             |   |
| MYH14                  | MYH14                  | 0           | 4.062365016 | 0           | 0 |
| LOC81691               | LOC81691               |             | 657.1393069 | 848.0186971 |   |
| 678.5703723            |                        | 538.3126623 |             |             |   |
| ZNF502                 | ZNF502                 | 19.91331233 | 14.21827756 | 212.4996692 |   |
| 298.8530892            |                        |             |             |             |   |
| TMEM114                | TMEM114                | 0           | 0           | 4.464278765 | 0 |
| CASP5                  | CASP5                  | 1.171371313 | 1.015591254 | 3.571423012 | 0 |
| MIEF2                  | MIEF2                  | 612.6271969 | 708.8826953 | 783.0344954 |   |
| 711.7794397            |                        |             |             |             |   |
| ZSCAN2                 | ZSCAN2                 | 534.1453189 | 557.5595985 | 734.8202847 |   |
| 444.9799941            |                        |             |             |             |   |
| C9orf131               | C9orf131               |             | 51.54033779 | 21.32741634 |   |
| 55.35705669            |                        | 61.27902461 |             |             |   |
| GXYLT2                 | GXYLT2                 | 45.68348122 | 31.48332888 | 8.035701777 |   |
| 22.62610139            |                        |             |             |             |   |
| PPM1N                  | PPM1N                  | 45.68348122 | 58.90429273 | 74.99988325 |   |
| 65.99279573            |                        |             |             |             |   |
| STAG3L5P-PVRIG2P-PILRB | STAG3L5P-PVRIG2P-PILRB |             |             | 2388.426108 |   |
| 1138.477796            |                        | 3390.173294 | 3651.287112 |             |   |
| WHAMMP1                | WHAMMP1                | 67.93953618 | 28.43655511 | 597.3204988 |   |
| 463.8350786            |                        |             |             |             |   |
| CCDC144B               | CCDC144B               |             | 428.7219007 | 240.6951272 |   |
| 470.5349818            |                        | 654.271432  |             |             |   |
| MROH6                  | MROH6                  | 24.59879758 | 17.26505132 | 24.99996108 |   |
| 31.11088942            |                        |             |             |             |   |
| KLHL35                 | KLHL35                 | 1.171371313 | 31.48332888 | 69.64274874 |   |
| 82.96237177            |                        |             |             |             |   |
| CD74                   | CD74                   | 69491.60317 | 69124.18752 | 42186.54147 |   |
| 40837.28475            |                        |             |             |             |   |
| PLEKHB2                | PLEKHB2                | 13079.53209 | 17455.98247 | 11533.01776 |   |
| 10688.00465            |                        |             |             |             |   |
| DNAJA3                 | DNAJA3                 | 6132.128826 | 8604.089104 | 7693.738024 |   |
| 7203.585031            |                        |             |             |             |   |
| ENPP2                  | ENPP2                  | 1618.835155 | 190.9311558 | 515.1777695 |   |
| 764.5736762            |                        |             |             |             |   |
| ATP4B                  | ATP4B                  | 1.171371313 | 0           | 0           | 0 |

|             |           |             |             |             |
|-------------|-----------|-------------|-------------|-------------|
| CELA1       | CELA1     | 19.91331233 | 4.062365016 | 8.035701777 |
| 5.656525348 |           |             |             |             |
| IL10        | IL10      | 752.0203832 | 186.8687907 | 417.8564924 |
| 650.5004151 |           |             |             |             |
| HOXA10      | HOXA10    | 0           | 0           | 8.484788022 |
| SPATA22     | SPATA22   | 2.342742627 | 0           | 0.892855753 |
| MBNL3       | MBNL3     | 871.5002572 | 333.1139313 | 737.498852  |
| 709.8939312 |           |             |             |             |
| PLEKHH1     | PLEKHH1   | 86.6814772  | 129.9956805 | 253.5710339 |
| 152.7261844 |           |             |             |             |
| TAOK1       | TAOK1     | 732.1070709 | 419.4391879 | 818.7487255 |
| 639.1873644 |           |             |             |             |
| CCDC54      | CCDC54    | 0           | 0           | 1.885508449 |
| CARD6       | CARD6     | 920.6978524 | 1014.575663 | 601.7847775 |
| 639.1873644 |           |             |             |             |
| GPR126      | GPR126    | 5.856856567 | 0           | 118.7498152 |
| WDR35       | WDR35     | 456.8348122 | 400.1429541 | 323.2137826 |
| 577.9083398 |           |             |             |             |
| TMEM200A    | TMEM200A  |             | 248.3307185 | 426.5483267 |
| 269.6424374 |           | 307.3378773 |             |             |
| PJA1        | PJA1      | 1310.7645   | 1963.137894 | 3259.816354 |
| 2569.005262 |           |             |             |             |
| GPRIN1      | GPRIN1    | 713.3651299 | 829.7380546 | 176.7854391 |
| 537.3699081 |           |             |             |             |
| PSG7        | PSG7      | 0           | 0           | 0.892855753 |
| ROB02       | ROB02     | 0           | 0           | 2.678567259 |
| INSL3       | INSL3     | 244.8166045 | 199.0558858 | 266.0710144 |
| 252.6581322 |           |             |             |             |
| LOC729683   | LOC729683 |             | 436.9214999 | 354.4413477 |
| 633.0347289 |           | 643.9011355 |             |             |
| MIR3127     | MIR3127   | 0           | 3.046773762 | 0           |
| AIFM3       | AIFM3     | 1.171371313 | 3.046773762 | 0.942754225 |
| 6.599279573 |           |             |             | 20.53568232 |
| XRRA1       | XRRA1     | 684.0808471 | 1960.09112  | 3049.102397 |
| 1144.503629 |           |             |             |             |
| TMC8        | TMC8      | 7391.352988 | 5875.195405 | 2485.710416 |
| 3550.41241  |           |             |             |             |
| POLR2H      | POLR2H    | 3256.412251 | 4169.002098 | 2771.424257 |
| 2999.843943 |           |             |             |             |
| FMN1        | FMN1      | 0           | 5.07795627  | 74.1070275  |
| PTPRCAP     | PTPRCAP   | 27271.86692 | 35374.05897 | 1.885508449 |
| 13610.54274 |           |             |             | 8631.236565 |
| NAA20       | NAA20     | 4625.745317 | 5272.949791 | 3882.136814 |
| 4390.406425 |           |             |             |             |
| MIR3618     | MIR3618   | 91.36696245 | 70.07579653 | 56.24991244 |
| 53.73699081 |           |             |             |             |
| MIR3615     | MIR3615   | 1484.127454 | 2145.94432  | 583.9276625 |
| 546.7974503 |           |             |             |             |
| RPS18P9     | RPS18P9   | 22.25605496 | 19.29623383 | 23.21424958 |
| 29.22538097 |           |             |             |             |

|             |             |             |             |             |
|-------------|-------------|-------------|-------------|-------------|
| IL13RA1     | IL13RA1     | 7.028227881 | 4.062365016 | 35.71423012 |
| 117.8442781 |             |             |             |             |
| TMEM262     | TMEM262     | 44.51210991 | 37.5768764  | 51.78563368 |
| 78.24860065 |             |             |             |             |
| RPA2        | RPA2        | 10525.94262 | 15940.72032 | 14017.83532 |
| 11680.72484 |             |             |             |             |
| UQCRH       | UQCRH       | 8203.113308 | 9311.956208 | 4644.635627 |
| 5146.495313 |             |             |             |             |
| DOCK7       | DOCK7       | 447.4638417 | 225.4612584 | 508.9277792 |
| 540.1981708 |             |             |             |             |
| HLA-D0B     | HLA-D0B     | 0           | 5.07795627  | 7.142846024 |
| 0           |             |             |             | 0           |
| SPAM1       | SPAM1       | 0           | 0           | 1.885508449 |
| 0           |             |             |             |             |
| SLC28A2     | SLC28A2     | 1.171371313 | 1.015591254 | 5.357134518 |
| 2.828262674 |             |             |             |             |
| MIR27A      | MIR27A      | 0           | 2.031182508 | 0           |
| 0           |             |             |             | 3.771016899 |
| LOC388692   | LOC388692   |             | 122.9939879 | 70.07579653 |
| 519.6420483 | 400.6705455 |             |             |             |
| CD200       | CD200       | 2285.345433 | 1744.785774 | 2831.245593 |
| 3533.442834 |             |             |             |             |
| MOCS1       | MOCS1       | 21.08468364 | 17.26505132 | 83.92844078 |
| 91.4471598  |             |             |             |             |
| MMP11       | MMP11       | 16.39919839 | 36.56128515 | 75.89273901 |
| 93.33266825 |             |             |             |             |
| METTL23     | METTL23     | 2130.724419 | 2001.730362 | 2593.745963 |
| 2370.084121 |             |             |             |             |
| MTRNR2L10   | MTRNR2L10   |             | 2.342742627 | 0           |
| 0.942754225 |             |             |             | 0.892855753 |
| NOL4        | NOL4        | 0           | 0           | 2.828262674 |
| 0           |             |             |             |             |
| ZNF3        | ZNF3        | 1669.204122 | 2141.881955 | 2902.674053 |
| 2218.300691 |             |             |             |             |
| RPE         | RPE         | 2697.668135 | 2430.309871 | 1528.569049 |
| 2226.785479 |             |             |             |             |
| CRSP8P      | CRSP8P      | 3.51411394  | 8.124730032 | 6.249990271 |
| 14.14131337 |             |             |             |             |
| RAB23       | RAB23       | 371.3247064 | 414.3612317 | 378.5708393 |
| 336.5632582 |             |             |             |             |
| MIR940      | MIR940      | 3.51411394  | 0           | 1.785711506 |
| 0           |             |             |             | 0.942754225 |
| MIR939      | MIR939      | 376.0101916 | 383.893494  | 181.2497179 |
| 292.2538097 |             |             |             |             |
| LOC644961   | LOC644961   |             | 181.5625536 | 145.2295493 |
| 276.7852834 | 180.0660569 |             |             |             |
| MTERF4      | MTERF4      | 1847.252561 | 2024.073369 | 2535.710339 |
| 2216.415182 |             |             |             |             |
| ALG3        | ALG3        | 3384.091725 | 4508.209577 | 3091.959473 |
| 3337.349955 |             |             |             |             |
| MIR933      | MIR933      | 2.342742627 | 5.07795627  | 4.464278765 |
| 0.942754225 |             |             |             |             |
| MPDU1       | MPDU1       | 5323.88262  | 6600.32756  | 2415.174812 |
| 3474.992072 |             |             |             |             |
| LOC283335   | LOC283335   |             | 8.199599194 | 7.109138778 |

|                 |                 |             |             |             |
|-----------------|-----------------|-------------|-------------|-------------|
| 95.53556557     | 15.0840676      |             |             |             |
| RCC1            | RCC1            | 6909.919378 | 7721.540305 | 3956.243842 |
| 3877.548126     |                 |             |             |             |
| C2CD3           | C2CD3           | 2239.661951 | 1156.758438 | 2022.318281 |
| 1945.84472      |                 |             |             |             |
| CCDC12          | CCDC12          | 2796.063325 | 3846.044079 | 3201.78073  |
| 2993.244663     |                 |             |             |             |
| ATP6V1G2-DDX39B | ATP6V1G2-DDX39B | 1.171371313 |             | 3.046773762 |
| 0.892855753     | 2.828262674     |             |             |             |
| RNF7            | RNF7            | 3380.577611 | 3520.039287 | 3061.602377 |
| 2995.130172     |                 |             |             |             |
| ZNF778          | ZNF778          | 359.6109932 | 388.9714503 | 508.9277792 |
| 332.7922413     |                 |             |             |             |
| TEX264          | TEX264          | 3400.490923 | 4291.88864  | 2373.210592 |
| 2535.06611      |                 |             |             |             |
| IN080B-WBP1     | IN080B-WBP1     |             | 1963.218321 | 1794.549746 |
| 1597.318942     | 1235.008034     |             |             |             |
| COLEC11         | COLEC11         | 2.342742627 | 0           | 0.892855753 |
| SMARCAD1        | SMARCAD1        |             | 3831.555566 | 3097.553325 |
| 2566.067434     | 3434.453641     |             |             |             |
| LINC00954       | LINC00954       |             | 87.85284851 | 33.51451138 |
| 286.6066967     | 208.3486837     |             |             |             |
| DDX11L10        | DDX11L10        |             | 2.342742627 | 0           |
| 0               |                 |             |             | 0.892855753 |
| FKBP9P1         | FKBP9P1         | 2.342742627 | 0           | 0           |
| PPIEL           | PPIEL           | 156.963756  | 45.70160643 | 88.39271955 |
| 54.67974503     |                 |             |             |             |
| API5            | API5            | 16859.54731 | 17544.33891 | 14217.83501 |
| 16382.24016     |                 |             |             |             |
| MIR3191         | MIR3191         | 1.171371313 | 5.07795627  | 5.357134518 |
| 0.942754225     |                 |             |             |             |
| MIR3190         | MIR3190         | 1.171371313 | 5.07795627  | 5.357134518 |
| 0.942754225     |                 |             |             |             |
| CROCCP2         | CROCCP2         | 616.1413109 | 297.5682374 | 697.3203431 |
| 1212.381933     |                 |             |             |             |
| MINK1           | MINK1           | 2805.434296 | 1424.874529 | 1681.247383 |
| 1822.343916     |                 |             |             |             |
| NFATC2          | NFATC2          | 7174.649295 | 4012.601045 | 3614.280088 |
| 5744.201491     |                 |             |             |             |
| RASA4B          | RASA4B          | 107.7661608 | 184.8376082 | 311.6066578 |
| 206.4631752     |                 |             |             |             |
| LRRC49          | LRRC49          | 8.199599194 | 8.124730032 | 6.249990271 |
| 0.942754225     |                 |             |             |             |
| ABCC10          | ABCC10          | 2804.262924 | 2848.733468 | 2504.460387 |
| 2526.581322     |                 |             |             |             |
| ZBTB33          | ZBTB33          | 1570.808931 | 1124.259518 | 2315.174968 |
| 2561.463229     |                 |             |             |             |
| TRIM26          | TRIM26          | 3.51411394  | 4.062365016 | 4.464278765 |
| LDB3            | LDB3            | 3.51411394  | 5.07795627  | 6.249990271 |
| 9.427542247     |                 |             |             | 0           |

|              |              |             |                     |               |
|--------------|--------------|-------------|---------------------|---------------|
| RAD51        | RAD51        | 5178.632577 | 6724.229693         | 1932.13985    |
| 3001.729451  |              |             |                     |               |
| SERPINA10    | SERPINA10    |             | 0 0                 | 0 4.713771124 |
| SNRK         | SNRK         | 4425.440822 | 3805.420429         | 5063.384975   |
| 5564.135434  |              |             |                     |               |
| ZNF250       | ZNF250       | 268.2440308 | 423.5015529         | 952.6770885   |
| 740.0620664  |              |             |                     |               |
| MLKL         | MLKL         | 1611.806927 | 2235.31635          | 1457.140589   |
| 1538.574895  |              |             |                     |               |
| PGM1         | PGM1         | 1902.307013 | 2217.035708         | 1903.568465   |
| 2182.47603   |              |             |                     |               |
| FAM122B      | FAM122B      | 1026.121271 | 364.5972602         | 443.7493093   |
| 618.4467714  |              |             |                     |               |
| ZNF419       | ZNF419       | 378.3529342 | 384.9090853         | 541.9634421   |
| 527.9423658  |              |             |                     |               |
| DNAH14       | DNAH14       | 39.82662466 | 12.18709505         | 14.28569205   |
| 53.73699081  |              |             |                     |               |
| VPS37A       | VPS37A       | 2142.438132 | 2494.29212          | 2436.60335    |
| 2704.761871  |              |             |                     |               |
| BBIP1        | BBIP1        | 1313.107242 | 1033.871897         | 3347.316218   |
| 3604.149401  |              |             |                     |               |
| LOC101928600 | LOC101928600 |             | 0 0                 | 0 1.885508449 |
| HS1BP3-IT1   | HS1BP3-IT1   |             | 0 0                 | 3.571423012 0 |
| SMN2         | SMN2         | 986.2946459 | 1317.221857         | 1178.569594   |
| 1169.957993  |              |             |                     |               |
| DCLRE1B      | DCLRE1B      | 2000.702203 | 2275.94 1443.747753 | 1710.156164   |
| VWA1         | VWA1         | 7.028227881 | 5.07795627          | 0 11.3130507  |
| FAM129B      | FAM129B      | 140.5645576 | 530.1386346         | 227.678217    |
| 32.99639787  |              |             |                     |               |
| MED8         | MED8         | 3009.252904 | 3603.317769         | 2744.638585   |
| 2853.717038  |              |             |                     |               |
| NPNT         | NPNT         | 1.171371313 | 0 1.785711506       | 0             |
| STX8         | STX8         | 1564.952075 | 1824.001892         | 1311.605101   |
| 1268.947186  |              |             |                     |               |
| RFX2         | RFX2         | 420.5223015 | 663.1810889         | 891.9628973   |
| 609.0192292  |              |             |                     |               |
| PPT2         | PPT2         | 0 0         | 0 1.885508449       |               |
| R3HCC1L      | R3HCC1L      | 2111.982478 | 2554.212004         | 2560.7103     |
| 2655.738651  |              |             |                     |               |
| P2RY10       | P2RY10       | 4386.785569 | 5845.743258         | 4014.279466   |
| 4505.42244   |              |             |                     |               |
| PDE4D        | PDE4D        | 3095.934381 | 1970.247033         | 1677.67596    |
| 2780.182209  |              |             |                     |               |
| LINC00877    | LINC00877    |             | 16.39919839         | 18.28064257   |
| 5.357134518  | 14.14131337  |             |                     |               |
| LOC100287072 | LOC100287072 |             | 0 0                 | 0.892855753   |
| 5.656525348  |              |             |                     |               |
| ARFRP1       | ARFRP1       | 3563.311536 | 4116.191353         | 3222.316413   |
| 3156.341144  |              |             |                     |               |
| HIGD1B       | HIGD1B       | 40.99799597 | 45.70160643         | 28.5713841    |

|              |              |             |             |             |             |
|--------------|--------------|-------------|-------------|-------------|-------------|
| 39.59567744  |              |             |             |             |             |
| ZMYND11      | ZMYND11      | 2958.883938 | 2544.056091 | 3174.995058 |             |
| 3060.180213  |              |             |             |             |             |
| SERPINB8     | SERPINB8     |             | 757.8772398 | 928.2504062 |             |
| 1078.56975   | 1013.460792  |             |             |             |             |
| PTPRB        | PTPRB        | 0           | 0           | 1.785711506 | 0.942754225 |
| ADARB1       | ADARB1       | 994.4942451 | 1513.230969 | 1029.462683 |             |
| 975.7506226  |              |             |             |             |             |
| ZNF559       | ZNF559       | 759.0486111 | 811.457412  | 2916.066889 |             |
| 1704.499638  |              |             |             |             |             |
| MTUS1        | MTUS1        | 220.2178069 | 70.07579653 | 326.7852056 |             |
| 685.3823214  |              |             |             |             |             |
| SPERT        | SPERT        | 3.51411394  | 9.140321286 | 8.035701777 |             |
| 5.656525348  |              |             |             |             |             |
| MXI1         | MXI1         | 739.1352988 | 688.5708702 | 4509.814409 |             |
| 3029.069324  |              |             |             |             |             |
| ZC3H8        | ZC3H8        | 476.7481246 | 499.670897  | 962.4985018 |             |
| 885.246217   |              |             |             |             |             |
| LOC101927653 | LOC101927653 | 0           | 0           | 1.785711506 | 0           |
| NDUFC1       | NDUFC1       | 4465.267447 | 4267.51445  | 3177.673625 |             |
| 3394.857963  |              |             |             |             |             |
| NET02        | NET02        | 2937.799254 | 3710.970442 | 1192.855286 |             |
| 1404.703795  |              |             |             |             |             |
| STX5         | STX5         | 1521.611336 | 1054.183722 | 1823.211448 |             |
| 1255.748627  |              |             |             |             |             |
| RPS6KB1      | RPS6KB1      | 4580.061836 | 4715.390193 | 3871.422545 |             |
| 3492.904403  |              |             |             |             |             |
| AHR          | AHR          | 3329.037273 | 3162.551165 | 3408.923265 |             |
| 3487.247877  |              |             |             |             |             |
| F8A1         | F8A1         | 1484.127454 | 1516.277742 | 1868.747091 |             |
| 1989.211414  |              |             |             |             |             |
| CLEC2B       | CLEC2B       | 2483.307185 | 1117.150379 | 3966.065255 |             |
| 3253.444829  |              |             |             |             |             |
| CKAP5        | CKAP5        | 14849.47414 | 10678.94204 | 5026.77789  |             |
| 8867.546238  |              |             |             |             |             |
| PTDSS1       | PTDSS1       | 10235.44254 | 15992.51548 | 7746.416513 |             |
| 7455.300409  |              |             |             |             |             |
| C19orf66     | C19orf66     |             | 3852.64025  | 3318.952218 |             |
| 5446.420093  | 4856.127012  |             |             |             |             |
| PHYH         | PHYH         | 1064.776524 | 1076.526729 | 990.1770301 |             |
| 1286.859517  |              |             |             |             |             |
| PFKFB2       | PFKFB2       | 69.11090749 | 43.67042392 | 413.3922137 |             |
| 132.9283457  |              |             |             |             |             |
| WRAP53       | WRAP53       | 1983.131634 | 2741.080795 | 1908.032744 |             |
| 1394.333498  |              |             |             |             |             |
| ZNF528       | ZNF528       | 337.3549383 | 417.4080054 | 1009.819857 |             |
| 464.7778328  |              |             |             |             |             |
| FAM53C       | FAM53C       | 4763.967132 | 4700.156324 | 4514.278687 |             |
| 4040.644607  |              |             |             |             |             |
| CYP39A1      | CYP39A1      | 0           | 2.031182508 | 0           | 0           |



|             |             |               |               |               |
|-------------|-------------|---------------|---------------|---------------|
| SYBU        | SYBU        | 1.171371313   | 2.031182508   | 14.28569205   |
| 31.11088942 |             |               |               |               |
| VEPH1       | VEPH1       | 1.171371313   | 5.07795627    | 0 7.542033798 |
| APEX1       | APEX1       | 6898.205665   | 8732.053602   | 8677.665064   |
| 8566.80764  |             |               |               |               |
| GADD45GIP1  | GADD45GIP1  |               | 3700.361979   | 5662.936833   |
| 3797.315518 | 3512.702241 |               |               |               |
| CCDC97      | CCDC97      | 3307.952589   | 3848.075262   | 3134.816549   |
| 2747.185811 |             |               |               |               |
| EMILIN3     | EMILIN3     | 1.171371313   | 2.031182508   | 2.678567259   |
| 7.542033798 |             |               |               |               |
| SRSF8       | SRSF8       | 2792.549211   | 2998.025382   | 5705.348262   |
| 4559.159431 |             |               |               |               |
| ABHD10      | ABHD10      | 3136.932377   | 3879.55859    | 3774.101268   |
| 3907.716261 |             |               |               |               |
| SHISA5      | SHISA5      | 13257.58053   | 14745.36942   | 14572.29875   |
| 12491.49348 |             |               |               |               |
| MEI4        | MEI4        | 0 0           | 0.892855753   | 0             |
| CALCRL      | CALCRL      | 86.6814772    | 10.15591254   | 0.892855753   |
| 27.33987252 |             |               |               |               |
| PUF60       | PUF60       | 15474.98642   | 24136.54174   | 16538.36711   |
| 15223.59522 |             |               |               |               |
| KCNMA1      | KCNMA1      | 3.51411394    | 3.046773762   | 9.821413283   |
| 41.48118589 |             |               |               |               |
| RHOBTB2     | RHOBTB2     | 818.7885481   | 819.582142    | 982.1413283   |
| 898.4447762 |             |               |               |               |
| MSRB3       | MSRB3       | 10.54234182   | 21.32741634   | 1.785711506   |
| 6.599279573 |             |               |               |               |
| SECISBP2L   | SECISBP2L   |               | 1705.516632   | 1121.212744   |
| 1402.676388 | 1508.40676  |               |               |               |
| RIMS1       | RIMS1       | 0 1.015591254 | 0 0           |               |
| GRTP1-AS1   | GRTP1-AS1   |               | 0 4.062365016 | 10.71426904   |
|             | 1.885508449 |               |               |               |
| EGFR        | EGFR        | 0 0           | 0 18.85508449 |               |
| BLM         | BLM         | 6125.100598   | 4974.365962   | 1569.640414   |
| 3639.974062 |             |               |               |               |
| SH3BGR      | SH3BGR      | 70.28227881   | 91.40321286   | 147.3211993   |
| 123.5008034 |             |               |               |               |
| GEMIN7      | GEMIN7      | 1809.768679   | 2557.258778   | 1188.391007   |
| 1444.299472 |             |               |               |               |
| CASKIN2     | CASKIN2     | 98.39519033   | 24.3741901    | 25.89281684   |
| 46.19495701 |             |               |               |               |
| MAK16       | MAK16       | 3990.862065   | 3844.012897   | 3908.922487   |
| 4247.107782 |             |               |               |               |
| FAM53B      | FAM53B      | 2422.395876   | 2160.162597   | 1513.390501   |
| 541.140925  |             |               |               |               |
| AURKAIP1    | AURKAIP1    |               | 6086.445345   | 9023.528292   |
| 5353.563095 | 4493.166635 |               |               |               |
| NFKBIL1     | NFKBIL1     | 32.79839678   | 68.04461402   | 42.85707615   |
| 57.50800771 |             |               |               |               |

|             |             |             |             |             |             |
|-------------|-------------|-------------|-------------|-------------|-------------|
| WWP2        | WWP2        | 6550.308385 | 8110.511755 | 5922.31221  |             |
| 6228.777163 |             |             |             |             |             |
| SERPINA1    | SERPINA1    |             | 0           | 0           | 114.2855364 |
| PRAP1       | PRAP1       | 2.342742627 | 0           | 11.60712479 | 12.25580492 |
| UBXN6       | UBXN6       | 234.2742627 | 156.4010531 | 184.8211409 |             |
| 165.9247436 |             |             |             |             |             |
| CLCN2       | CLCN2       | 87.85284851 | 98.51235164 | 96.42842133 |             |
| 140.4703795 |             |             |             |             |             |
| MIR4444-2   | MIR4444-2   |             | 376.0101916 | 338.1918876 |             |
| 274.9995719 | 276.2269878 |             |             |             |             |
| CLIP4       | CLIP4       | 1877.708215 | 1182.14822  | 2934.81686  |             |
| 2899.911995 |             |             |             |             |             |
| MIR7851     | MIR7851     | 39.82662466 | 20.31182508 | 28.5713841  |             |
| 30.16813519 |             |             |             |             |             |
| MIR6846     | MIR6846     | 0           | 0           | 1.885508449 |             |
| ZNF627      | ZNF627      | 445.1210991 | 490.5305757 | 1121.426826 |             |
| 973.8651141 |             |             |             |             |             |
| RHOT1       | RHOT1       | 3027.994845 | 2929.980768 | 2810.709911 |             |
| 3187.452034 |             |             |             |             |             |
| NEURL1B     | NEURL1B     | 1.171371313 | 1.015591254 | 15.1785478  |             |
| 16.96957604 |             |             |             |             |             |
| CTH         | CTH         | 104.2520469 | 132.026863  | 316.9637923 |             |
| 108.4167358 |             |             |             |             |             |
| DOCK8       | DOCK8       | 17364.40835 | 12038.81873 | 7937.487644 |             |
| 10738.91337 |             |             |             |             |             |
| DYNC2LI1    | DYNC2LI1    |             | 333.8408243 | 300.6150112 |             |
| 254.4638896 | 431.7814349 |             |             |             |             |
| KIRREL3     | KIRREL3     | 1.171371313 | 3.046773762 | 2.678567259 | 0           |
| ST6GAL2     | ST6GAL2     | 0           | 4.464278765 | 0           |             |
| PPM1L       | PPM1L       | 66.76816487 | 43.67042392 | 46.42849916 |             |
| 68.8210584  |             |             |             |             |             |
| CCL23       | CCL23       | 0           | 5.07795627  | 0           | 2.828262674 |
| UEVLD       | UEVLD       | 1113.974119 | 1506.12183  | 1233.033795 |             |
| 876.761429  |             |             |             |             |             |
| PCDH15      | PCDH15      | 0           | 0           | 2.678567259 | 0           |
| TTLL11      | TTLL11      | 86.6814772  | 142.1827756 | 151.785478  |             |
| 110.3022443 |             |             |             |             |             |
| PARP9       | PARP9       | 9833.662176 | 10239.19102 | 22693.71467 |             |
| 16931.86588 |             |             |             |             |             |
| STRADA      | STRADA      | 2577.01689  | 3119.896332 | 2344.639207 |             |
| 2198.502852 |             |             |             |             |             |
| ARHGAP4     | ARHGAP4     | 9042.98654  | 8315.661188 | 3166.959356 |             |
| 4845.756715 |             |             |             |             |             |
| SMAD7       | SMAD7       | 653.6251929 | 1156.758438 | 630.3561616 |             |
| 761.7454136 |             |             |             |             |             |
| SCAMP4      | SCAMP4      | 1354.105238 | 1148.633708 | 875.8914937 |             |
| 886.1889712 |             |             |             |             |             |
| HSD17B12    | HSD17B12    |             | 1983.131634 | 2613.116297 |             |
| 1750.890132 | 1829.88595  |             |             |             |             |
| C6orf165    | C6orf165    |             | 0           | 0           | 2.678567259 |
|             |             |             |             |             | 0           |

|             |          |             |             |             |             |             |
|-------------|----------|-------------|-------------|-------------|-------------|-------------|
| BANK1       | BANK1    | 0           | 4.062365016 | 0           | 38.65292321 |             |
| ASB10       | ASB10    | 0           | 0           | 0           | 0.942754225 |             |
| PXN         | PXN      | 8355.391579 |             | 7747.945677 |             | 5255.348962 |
| 4887.237901 |          |             |             |             |             |             |
| VPRBP       | VPRBP    | 5374.251586 |             | 4567.113869 |             | 5410.705863 |
| 4958.887222 |          |             |             |             |             |             |
| NFYC        | NFYC     | 4895.160719 |             | 6268.22922  |             | 4815.171076 |
| 4559.159431 |          |             |             |             |             |             |
| ZNF780A     | ZNF780A  | 647.7683363 |             | 423.5015529 |             | 872.3200707 |
| 827.7382093 |          |             |             |             |             |             |
| RTL1        | RTL1     | 0           | 0           | 5.357134518 |             | 0           |
| TCF7        | TCF7     | 1314.278614 |             | 857.1590184 |             | 12118.73114 |
| 11963.55111 |          |             |             |             |             |             |
| VRK3        | VRK3     | 4063.487086 |             | 4952.022955 |             | 5033.920736 |
| 4732.626208 |          |             |             |             |             |             |
| TMBIM1      | TMBIM1   | 8492.442023 |             | 10074.66524 |             | 8221.415774 |
| 6998.06461  |          |             |             |             |             |             |
| BAG6        | BAG6     | 5.856856567 |             | 1.015591254 |             | 2.678567259 |
| 0.942754225 |          |             |             |             |             |             |
| ASPH        | ASPH     | 306.8992841 |             | 288.4279162 |             | 556.2491341 |
| 476.0908835 |          |             |             |             |             |             |
| NOS1        | NOS1     | 0           | 0           | 5.357134518 |             | 2.828262674 |
| DST         | DST      | 296.3569423 |             | 297.5682374 |             | 245.5353321 |
| 196.0928787 |          |             |             |             |             |             |
| BMP6        | BMP6     | 638.3973658 |             | 681.4617315 |             | 414.2850694 |
| 561.8815179 |          |             |             |             |             |             |
| CXCR5       | CXCR5    | 353.7541367 |             | 251.866631  |             | 1213.390968 |
| 1657.361927 |          |             |             |             |             |             |
| ITPRIPL1    | ITPRIPL1 |             |             | 2427.081361 |             | 2367.343213 |
| 1011.605568 |          | 1597.968411 |             |             |             |             |
| RANBP3      | RANBP3   | 972.2381902 |             | 509.8268095 |             | 385.7136853 |
| 450.6365194 |          |             |             |             |             |             |
| PLXNB3      | PLXNB3   | 8.199599194 |             | 5.07795627  |             | 23.21424958 |
| CHRNA9      | CHRNA9   | 1.171371313 |             | 0           | 27.67852834 | 0           |
| CSRP2BP     | CSRP2BP  | 1855.452161 |             | 2264.768497 |             | 2298.210708 |
| 2366.313104 |          |             |             |             |             |             |
| CYP2D6      | CYP2D6   | 30.45565415 |             | 18.28064257 |             | 25.89281684 |
| 27.33987252 |          |             |             |             |             |             |
| PDLIM5      | PDLIM5   | 1686.774691 |             | 2284.06473  |             | 2902.674053 |
| 2346.515265 |          |             |             |             |             |             |
| CSNK1G3     | CSNK1G3  | 2060.44214  |             | 1819.939527 |             | 2666.067279 |
| 2789.609751 |          |             |             |             |             |             |
| CDK2AP1     | CDK2AP1  | 3694.505123 |             | 4042.053191 |             | 1982.139772 |
| 2705.704625 |          |             |             |             |             |             |
| AKAP9       | AKAP9    | 2011.244545 |             | 1837.204579 |             | 3017.852445 |
| 2742.47204  |          |             |             |             |             |             |
| FAM208A     | FAM208A  | 4011.946749 |             | 2109.383035 |             | 2328.567804 |
| 3233.646991 |          |             |             |             |             |             |
| TAGLN3      | TAGLN3   | 4.685485254 |             | 24.3741901  |             | 23.21424958 |
| 16.96957604 |          |             |             |             |             |             |

|             |         |             |             |             |
|-------------|---------|-------------|-------------|-------------|
| SAP30BP     | SAP30BP | 3582.053477 | 4257.358537 | 4396.421728 |
| 3735.192238 |         |             |             |             |
| TTC22       | TTC22   | 450.9779557 | 378.8155378 | 266.9638702 |
| 393.1285117 |         |             |             |             |
| MRPL1       | MRPL1   | 1432.587116 | 1516.277742 | 1075.891182 |
| 1399.990024 |         |             |             |             |
| PSMG2       | PSMG2   | 5257.114455 | 4918.508443 | 4118.743589 |
| 4641.179048 |         |             |             |             |
| PRDM8       | PRDM8   | 2070.984482 | 304.6773762 | 249.9996108 |
| 868.276641  |         |             |             |             |
| ANK1        | ANK1    | 1014.407557 | 358.5037127 | 484.8206739 |
| 1039.85791  |         |             |             |             |
| USP19       | USP19   | 6427.314397 | 6619.623794 | 7511.59545  |
| 6920.758764 |         |             |             |             |
| SLC35D1     | SLC35D1 | 3338.408243 | 2062.665837 | 1232.140939 |
| 1933.588915 |         |             |             |             |
| SLAMF8      | SLAMF8  | 39.82662466 | 37.5768764  | 157.1426125 |
| 36.76741476 |         |             |             |             |
| KCMF1       | KCMF1   | 3897.15236  | 3465.197359 | 2996.423907 |
| 2780.182209 |         |             |             |             |
| PON2        | PON2    | 408.8085884 | 550.4504597 | 303.570956  |
| 446.8655025 |         |             |             |             |
| SCG2        | SCG2    | 0           | 3.046773762 | 6.249990271 |
| 0           |         |             |             | 0           |
| CXCR4       | CXCR4   | 5113.035783 | 6869.459242 | 11982.12421 |
| 11429.95222 |         |             |             |             |
| PAX8        | PAX8    | 190.9335241 | 79.21611782 | 47.32135491 |
| 217.7762259 |         |             |             |             |
| AP1M2       | AP1M2   | 0           | 0           | 2.828262674 |
| 0           |         |             |             |             |
| LIF         | LIF     | 2117.839335 | 1761.035235 | 914.2842911 |
| 643.9011355 |         |             |             |             |
| NUDT1       | NUDT1   | 3655.849869 | 4760.076208 | 1683.033094 |
| 1982.612135 |         |             |             |             |
| MPG         | MPG     | 2435.280961 | 3412.386614 | 1749.997276 |
| 1975.070101 |         |             |             |             |
| LCT         | LCT     | 22.25605496 | 23.35859884 | 14.28569205 |
| 10.37029647 |         |             |             |             |
| CHIT1       | CHIT1   | 19.91331233 | 16.24946006 | 0           |
| 0           |         |             |             | 1.885508449 |
| GTF2F1      | GTF2F1  | 3657.021241 | 4609.768702 | 4150.886396 |
| 3248.731058 |         |             |             |             |
| FGB         | FGB     | 0           | 0           | 0.942754225 |
| 0           |         |             |             |             |
| SLC12A6     | SLC12A6 | 3487.1724   | 2687.254458 | 2548.210319 |
| 2870.686614 |         |             |             |             |
| MRPL3       | MRPL3   | 8158.601198 | 10501.21357 | 7934.809077 |
| 8333.004592 |         |             |             |             |
| MMP2        | MMP2    | 7.028227881 | 26.40537261 | 0           |
| 0           |         |             |             | 22.62610139 |
| SPG21       | SPG21   | 6077.074374 | 7466.6269   | 6274.990232 |
| 5568.849205 |         |             |             |             |
| WDR81       | WDR81   | 3475.458687 | 1966.184668 | 2252.675065 |
| 2294.663783 |         |             |             |             |
| ZNF587B     | ZNF587B | 531.8025763 | 462.0940206 | 707.1417564 |

|                 |             |            |             |             |
|-----------------|-------------|------------|-------------|-------------|
| 700.466389      |             |            |             |             |
| SLC25A22        | SLC25A22    |            | 2435.280961 | 2392.732995 |
| 2004.461166     | 1726.182985 |            |             |             |
| ITIH2 ITIH2     | 1.171371313 |            | 2.031182508 | 24.99996108 |
| 11.3130507      |             |            |             |             |
| NCEH1 NCEH1     | 919.5264811 |            | 1268.473476 | 485.7135296 |
| 630.7025763     |             |            |             |             |
| AFF2 AFF2       | 16.39919839 | 0          | 0.892855753 | 10.37029647 |
| MEGF6 MEGF6     | 45.68348122 |            | 17.26505132 | 352.6780224 |
| 403.4988082     |             |            |             |             |
| DCTN1 DCTN1     | 10397.09178 |            | 11630.55104 | 6947.310614 |
| 8356.573448     |             |            |             |             |
| ARHGEF1 ARHGEF1 | 20809.41138 |            | 20189.95413 | 11578.55341 |
| 13709.53194     |             |            |             |             |
| CPEB3 CPEB3     | 317.4416259 |            | 160.4634181 | 255.3567454 |
| 209.2914379     |             |            |             |             |
| HDHD1 HDHD1     | 2106.125622 |            | 4415.790773 | 1966.961224 |
| 1291.573288     |             |            |             |             |
| ZNF568 ZNF568   | 294.0141997 |            | 266.0849086 | 880.3557725 |
| 805.1121079     |             |            |             |             |
| SYPL1 SYPL1     | 1836.71022  |            | 2452.652879 | 5008.920775 |
| 4372.494094     |             |            |             |             |
| DISC1 DISC1     | 192.1048954 |            | 106.6370817 | 267.8567259 |
| 278.1124963     |             |            |             |             |
| DNAI2 DNAI2     | 38.65525334 |            | 81.24730032 | 58.9284797  |
| 14.14131337     |             |            |             |             |
| AQP10 AQP10     | 0           | 5.07795627 | 0           | 0           |
| UCP3 UCP3       | 39.82662466 |            | 59.91988399 | 204.4639674 |
| 145.1841506     |             |            |             |             |
| CYB561 CYB561   | 445.1210991 |            | 42.65483267 | 1156.2482   |
| 1305.714601     |             |            |             |             |
| VDR VDR         | 7606.88531  |            | 5564.424481 | 3714.279933 |
| 4808.9893       |             |            |             |             |
| MYBL1 MYBL1     | 156.963756  |            | 233.5859884 | 383.0351181 |
| 547.7402046     |             |            |             |             |
| IL18BP IL18BP   | 323.2984825 |            | 465.1407944 | 508.9277792 |
| 399.7277913     |             |            |             |             |
| C2orf81 C2orf81 | 44.51210991 |            | 49.76397145 | 182.1425736 |
| 107.4739816     |             |            |             |             |
| SPHK1 SPHK1     | 330.3267104 |            | 331.0827488 | 533.0348846 |
| 319.5936822     |             |            |             |             |
| PLBD2 PLBD2     | 661.8247921 |            | 600.2144311 | 376.7851278 |
| 488.3466884     |             |            |             |             |
| FBX028 FBX028   | 1720.744459 |            | 1847.360491 | 1966.068368 |
| 2025.036075     |             |            |             |             |
| GPR156 GPR156   | 4.685485254 |            | 7.109138778 | 0 0         |
| OTUD3 OTUD3     | 214.3609504 |            | 191.946747  | 324.1066384 |
| 276.2269878     |             |            |             |             |
| ABCB8 ABCB8     | 2750.379844 |            | 2774.595306 | 1673.211681 |
| 1936.417178     |             |            |             |             |

|                 |              |             |             |             |
|-----------------|--------------|-------------|-------------|-------------|
| LINC00608       | LINC00608    | 0           | 0           | 0.892855753 |
| 0.942754225     |              |             |             |             |
| LOC101060389    | LOC101060389 | 69.11090749 |             | 30.46773762 |
| 64.28561422     | 82.01961755  |             |             |             |
| C1RL-AS1        | C1RL-AS1     | 329.1553391 |             | 144.2139581 |
| 227.678217      | 185.7225823  |             |             |             |
| C6orf52 C6orf52 | 110.1089035  | 142.1827756 |             | 152.6783338 |
| 76.3630922      |              |             |             |             |
| ZNF487 ZNF487   | 72.62502143  | 76.16934405 |             | 52.67848943 |
| 72.5920753      |              |             |             |             |
| POP4 POP4       | 5715.120638  | 8160.275726 |             | 4844.635316 |
| 4848.584978     |              |             |             |             |
| MIR3922 MIR3922 | 1.171371313  | 1.015591254 | 0           | 0           |
| ABHD11-AS1      | ABHD11-AS1   | 12.88508445 |             | 11.17150379 |
| 1.785711506     | 5.656525348  |             |             |             |
| EFCAB2 EFCAB2   | 146.4214142  | 74.13816155 |             | 79.46416202 |
| 115.9587696     |              |             |             |             |
| PDCD4-AS1       | PDCD4-AS1    | 133.5363297 |             | 123.902133  |
| 308.9280905     | 178.1805485  |             |             |             |
| LOC100268168    | LOC100268168 | 1.171371313 |             | 16.24946006 |
| 32.14280711     | 17.91233027  |             |             |             |
| MIR3918 MIR3918 | 230.7601488  | 287.4123249 |             | 249.1067551 |
| 319.5936822     |              |             |             |             |
| KLRAP1 KLRAP1   | 24.59879758  | 9.140321286 |             | 91.96414256 |
| 54.67974503     |              |             |             |             |
| MIR744 MIR744   | 1.171371313  | 5.07795627  | 13.3928363  | 0           |
| CTNND2 CTNND2   | 4.685485254  | 0           | 7.142846024 | 2.828262674 |
| ZNF415 ZNF415   | 11.71371313  | 0           | 162.4997471 | 80.1341091  |
| PRKAB2 PRKAB2   | 340.8690522  | 339.2074789 |             | 975.8913381 |
| 796.6273199     |              |             |             |             |
| MGAT1 MGAT1     | 8657.605378  | 10642.38075 |             | 9246.414178 |
| 8301.893703     |              |             |             |             |
| REPS2 REPS2     | 0            | 0           | 6.249990271 | 0.942754225 |
| BUB3 BUB3       | 19229.23148  | 25857.96892 |             | 17940.15065 |
| 18235.69497     |              |             |             |             |
| MCOLN2 MCOLN2   | 1221.74028   | 576.8558323 |             | 963.3913575 |
| 694.8098636     |              |             |             |             |
| PHRF1 PHRF1     | 5870.913023  | 5414.116975 |             | 5051.777851 |
| 4232.966469     |              |             |             |             |
| DOCK6 DOCK6     | 23.42742627  | 2.031182508 |             | 18.74997081 |
| 19.79783872     |              |             |             |             |
| TTN TTN         | 1399.78872   | 1322.299813 |             | 1757.140122 |
| 1795.946798     |              |             |             |             |
| PTPN2 PTPN2     | 4827.221183  | 4522.427854 |             | 3381.244737 |
| 4752.424047     |              |             |             |             |
| SPHAR SPHAR     | 233.1028914  | 162.4946006 |             | 133.928363  |
| 136.6993626     |              |             |             |             |
| GLRX3 GLRX3     | 5595.640764  | 6638.920028 |             | 4374.100334 |
| 4852.355995     |              |             |             |             |
| RPP21 RPP21     | 0            | 115.777403  | 200.8925444 | 0           |

|             |             |             |             |             |             |
|-------------|-------------|-------------|-------------|-------------|-------------|
| ZNF613      | ZNF613      | 607.9417117 | 611.3859349 | 1133.926806 |             |
| 819.2534213 |             |             |             |             |             |
| EIF3IP1     | EIF3IP1     | 1.171371313 | 0           | 0           | 0           |
| PPP2R5E     | PPP2R5E     | 3580.882105 | 2919.824855 | 2667.85299  |             |
| 2806.579327 |             |             |             |             |             |
| SNORA59B    | SNORA59B    |             | 2.342742627 | 4.062365016 |             |
| 2.678567259 | 8.484788022 |             |             |             |             |
| ZNF658B     | ZNF658B     | 4.685485254 | 5.07795627  | 11.60712479 |             |
| 11.3130507  |             |             |             |             |             |
| C1orf180    | C1orf180    |             | 0           | 0           | 0.942754225 |
| LHFPL3-AS2  | LHFPL3-AS2  |             | 1.171371313 | 2.031182508 | 0           |
| 0           |             |             |             |             |             |
| AKAP14      | AKAP14      | 1.171371313 | 2.031182508 | 0.892855753 |             |
| 0.942754225 |             |             |             |             |             |
| TMEM30B     | TMEM30B     | 23.42742627 | 52.81074521 | 349.9994552 |             |
| 324.3074533 |             |             |             |             |             |
| PRKCZ       | PRKCZ       | 367.8105924 | 604.2767962 | 1039.284097 |             |
| 1083.224604 |             |             |             |             |             |
| PIKFYVE     | PIKFYVE     | 2065.127626 | 841.9251496 | 1512.497646 |             |
| 1502.750234 |             |             |             |             |             |
| CASS4       | CASS4       | 283.4718579 | 302.6461937 | 424.9993384 |             |
| 423.2966469 |             |             |             |             |             |
| C10orf2     | C10orf2     | 824.6454047 | 791.1455869 | 1160.712479 |             |
| 1011.575283 |             |             |             |             |             |
| RNF166      | RNF166      | 4314.160547 | 3495.665096 | 2193.746585 |             |
| 2415.336324 |             |             |             |             |             |
| SLC23A2     | SLC23A2     | 2193.97847  | 1898.140054 | 1055.3555   |             |
| 1512.177776 |             |             |             |             |             |
| CHST12      | CHST12      | 1943.305009 | 2496.323302 | 945.5342425 |             |
| 910.7005811 |             |             |             |             |             |
| CHCHD1      | CHCHD1      | 2463.393872 | 2364.296439 | 1510.711934 |             |
| 1914.73383  |             |             |             |             |             |
| TRIM7       | TRIM7       | 26.94154021 | 39.60805891 | 90.17843106 |             |
| 49.02321969 |             |             |             |             |             |
| ETV6        | ETV6        | 3303.267104 | 1696.037394 | 2046.425386 |             |
| 2905.568521 |             |             |             |             |             |
| GRTP1       | GRTP1       | 1.171371313 | 9.140321286 | 38.39279738 |             |
| 30.16813519 |             |             |             |             |             |
| DLX4        | DLX4        | 4.685485254 | 4.062365016 | 19.64282657 |             |
| 7.542033798 |             |             |             |             |             |
| FUT5        | FUT5        | 1.171371313 | 1.015591254 | 25.89281684 | 0           |
| JAK3        | JAK3        | 23030.33139 | 16543.98153 | 13225.87227 |             |
| 17906.67374 |             |             |             |             |             |
| BRD2        | BRD2        | 168.6774691 | 155.3854619 | 344.6423207 |             |
| 232.8602935 |             |             |             |             |             |
| GBF1        | GBF1        | 8426.845229 | 6041.75237  | 4625.885656 |             |
| 5251.141032 |             |             |             |             |             |
| CFL1        | CFL1        | 103491.8269 | 105527.0404 | 43467.78948 |             |
| 52964.8751  |             |             |             |             |             |
| SCARB2      | SCARB2      | 1106.945891 | 998.3262027 | 1978.568349 |             |

|             |             |             |             |             |
|-------------|-------------|-------------|-------------|-------------|
| 1127.534053 |             |             |             |             |
| HSPA1L      | HSPA1L      | 18.74194102 | 18.28064257 | 14.28569205 |
| 17.91233027 |             |             |             |             |
| PEX16       | PEX16       | 1687.946063 | 2389.686221 | 2958.03111  |
| 1844.027264 |             |             |             |             |
| RLBP1       | RLBP1       | 1.171371313 | 9.140321286 | 9.821413283 |
| 10.37029647 |             |             |             |             |
| PITX2       | PITX2       | 1.171371313 | 0           | 4.464278765 |
| KAT8        | KAT8        | 1466.556884 | 1097.854146 | 2306.24641  |
| 1947.730228 |             |             |             |             |
| HCG4B       | HCG4B       | 36.31251072 | 23.35859884 | 49.10706642 |
| 89.56165135 |             |             |             |             |
| MAGED1      | MAGED1      | 3934.636242 | 4530.552584 | 2721.424335 |
| 3357.147794 |             |             |             |             |
| C16orf59    | C16orf59    |             | 1348.248382 | 1617.836868 |
| 845.5343981 | 806.0548621 |             |             |             |
| FGD2        | FGD2        | 55.05445173 | 218.3521196 | 19.64282657 |
| 14.14131337 |             |             |             |             |
| DBF4B       | DBF4B       | 681.7381044 | 452.9536993 | 249.1067551 |
| 210.2341921 |             |             |             |             |
| ANXA11      | ANXA11      | 16355.85765 | 20269.17025 | 13687.47869 |
| 14744.67607 |             |             |             |             |
| GPRC6A      | GPRC6A      | 0           | 0           | 1.885508449 |
| WDFY4       | WDFY4       | 11.71371313 | 34.53010264 | 1.785711506 |
| 56.56525348 |             |             |             |             |
| TRPM3       | TRPM3       | 0           | 0           | 5.357134518 |
| GADD45B     | GADD45B     | 1374.018551 | 3162.551165 | 5946.419315 |
| 2585.032084 |             |             |             |             |
| RSL1D1      | RSL1D1      | 7905.584995 | 9971.074932 | 10092.84143 |
| 10407.06389 |             |             |             |             |
| TRUB2       | TRUB2       | 3040.87993  | 5024.129934 | 3257.137787 |
| 3409.942031 |             |             |             |             |
| NBEA        | NBEA        | 38.65525334 | 3.046773762 | 25.89281684 |
| 43.36669434 |             |             |             |             |
| FN1         | FN1         | 31.62702546 | 49.76397145 | 21.42853807 |
| 37.71016899 |             |             |             |             |
| TCTE1       | TCTE1       | 2.342742627 | 0           | 0           |
| SPC24       | SPC24       | 414.665445  | 454.9848818 | 90.17843106 |
| 294.1393181 |             |             |             |             |
| VPS36       | VPS36       | 3304.438475 | 3135.130201 | 2565.174578 |
| 3355.262286 |             |             |             |             |
| MRS2P2      | MRS2P2      | 39.82662466 | 31.48332888 | 81.24987353 |
| 30.16813519 |             |             |             |             |
| LINC01278   | LINC01278   |             | 255.3589463 | 316.8644713 |
| 586.6062297 | 518.5148236 |             |             |             |
| FTSJ1       | FTSJ1       | 4508.608186 | 5723.872308 | 4784.81398  |
| 4504.479686 |             |             |             |             |
| TP53AIP1    | TP53AIP1    |             | 0           | 0           |
| WAPAL       | WAPAL       | 8474.871453 | 8957.514861 | 2.828262674 |
| 8773.270815 |             |             |             | 8753.557803 |



|             |         |             |             |             |
|-------------|---------|-------------|-------------|-------------|
| CDT1        | CDT1    | 3931.122128 | 3984.16449  | 1467.854858 |
| 1798.775061 |         |             |             |             |
| SMIM19      | SMIM19  | 1676.23235  | 1759.004052 | 1949.996965 |
| 1931.703406 |         |             |             |             |
| FAM83F      | FAM83F  | 7.028227881 | 13.2026863  | 43.7499319  |
| 23.56885562 |         |             |             |             |
| EVI5        | EVI5    | 491.9759517 | 290.4590987 | 348.2137437 |
| 1017.231808 |         |             |             |             |
| C1RL        | C1RL    | 200.3044946 | 126.9489068 | 64.28561422 |
| 131.9855915 |         |             |             |             |
| CREB3       | CREB3   | 2974.111765 | 4302.044552 | 4758.028308 |
| 3359.976057 |         |             |             |             |
| CAP1        | CAP1    | 69794.98834 | 73819.26589 | 32280.3069  |
| 40668.53175 |         |             |             |             |
| GON4L       | GON4L   | 3726.132148 | 2934.043133 | 3566.958733 |
| 3630.546519 |         |             |             |             |
| POLR2F      | POLR2F  | 3147.474719 | 4192.360697 | 2940.173995 |
| 2568.062508 |         |             |             |             |
| ACTL6B      | ACTL6B  | 0           | 0           | 0.892855753 |
| 2.828262674 |         |             |             |             |
| PHLDA1      | PHLDA1  | 5342.624561 | 5836.602937 | 3558.030176 |
| 6737.864444 |         |             |             |             |
| SLC35B2     | SLC35B2 | 3587.910333 | 4964.21005  | 2283.925016 |
| 2570.890771 |         |             |             |             |
| BMP8A       | BMP8A   | 97.22381902 | 38.59246765 | 98.21413283 |
| 104.6457189 |         |             |             |             |
| UBXN11      | UBXN11  | 17574.08382 | 18552.82103 | 8557.129537 |
| 10713.45901 |         |             |             |             |
| KANSL1      | KANSL1  | 589.1997707 | 280.3031861 | 534.8205961 |
| 596.7634242 |         |             |             |             |
| SLAMF7      | SLAMF7  | 529.4598337 | 1086.682642 | 1949.104109 |
| 1119.992019 |         |             |             |             |
| TRMT10C     | TRMT10C | 2082.698195 | 2324.688381 | 2900.888342 |
| 3000.786697 |         |             |             |             |
| WRAP73      | WRAP73  | 2343.913998 | 2641.552852 | 2461.603311 |
| 2556.749457 |         |             |             |             |
| COG1        | COG1    | 2601.615687 | 4062.365016 | 6121.419043 |
| 3919.972066 |         |             |             |             |
| HID1        | HID1    | 10.54234182 | 8.124730032 | 489.2849527 |
| 364.845885  |         |             |             |             |
| NDUFAF5     | NDUFAF5 | 655.9679355 | 687.555279  | 613.3919023 |
| 483.6329173 |         |             |             |             |
| EMR1        | EMR1    | 19.91331233 | 795.2079519 | 941.0699637 |
| 85.79063445 |         |             |             |             |
| A2ML1       | A2ML1   | 2.342742627 | 0           | 10.71426904 |
| 0           |         |             |             |             |
| ZNF789      | ZNF789  | 433.407386  | 415.3768229 | 499.1063659 |
| 315.8226653 |         |             |             |             |
| INSC        | INSC    | 8.199599194 | 9.140321286 | 20.53568232 |
| 8.484788022 |         |             |             |             |
| GH1         | GH1     | 0           | 3.046773762 | 8.92855753  |
| 0           |         |             |             |             |
| TMEM62      | TMEM62  | 1034.32087  | 1139.493387 | 707.1417564 |

|              |              |             |             |             |             |
|--------------|--------------|-------------|-------------|-------------|-------------|
| 1041.743418  |              |             |             |             |             |
| TMEM134      | TMEM134      | 1391.58912  | 1593.462678 | 1750.890132 |             |
| 1542.345912  |              |             |             |             |             |
| GRIN1        | GRIN1        | 0           | 0           | 0           | 5.656525348 |
| ENPP5        | ENPP5        | 2.342742627 | 0           | 126.7855169 | 142.3558879 |
| COA7         | COA7         | 1009.722072 | 1257.301973 | 925.8914159 |             |
| 838.1085058  |              |             |             |             |             |
| C5orf42      | C5orf42      | 509.5465214 | 312.8021062 | 181.2497179 |             |
| 331.8494871  |              |             |             |             |             |
| C2orf48      | C2orf48      | 243.6452332 | 187.884382  | 137.499786  |             |
| 87.6761429   |              |             |             |             |             |
| NOM1         | NOM1         | 989.8087599 | 1076.526729 | 1105.355422 |             |
| 863.5628698  |              |             |             |             |             |
| CTNBL1       | CTNBL1       | 5040.410762 | 7261.477466 | 4536.600081 |             |
| 4870.268325  |              |             |             |             |             |
| N4BP1        | N4BP1        | 5016.983336 | 4493.991299 | 4716.064088 |             |
| 4394.177441  |              |             |             |             |             |
| CPNE1        | CPNE1        | 6793.953618 | 12085.53592 | 13924.97832 |             |
| 8598.861284  |              |             |             |             |             |
| DHX36        | DHX36        | 2089.726423 | 1667.600839 | 2078.568193 |             |
| 2265.438402  |              |             |             |             |             |
| CC2D2A       | CC2D2A       | 10.54234182 | 5.07795627  | 7.142846024 |             |
| 6.599279573  |              |             |             |             |             |
| SRPRB        | SRPRB        | 3531.68451  | 4935.773495 | 4382.136036 |             |
| 4230.138206  |              |             |             |             |             |
| CYP4F11      | CYP4F11      | 0           | 0           | 0.892855753 | 0           |
| RAP2C        | RAP2C        | 1891.764671 | 1480.732048 | 1669.640258 |             |
| 1795.946798  |              |             |             |             |             |
| HMHB1        | HMHB1        | 9.370970508 | 18.28064257 | 24.10710533 |             |
| 16.96957604  |              |             |             |             |             |
| CCNB1IP1     | CCNB1IP1     |             | 450.9779557 | 335.1451138 |             |
| 499.1063659  |              | 428.9531722 |             |             |             |
| DEDD         | DEDD         | 3495.371999 | 4513.287533 | 3919.636756 |             |
| 4253.707062  |              |             |             |             |             |
| GHRH         | GHRH         | 0           | 0           | 6.249990271 | 5.656525348 |
| KAT2A        | KAT2A        | 1222.911651 | 806.3794557 | 932.1414062 |             |
| 882.4179543  |              |             |             |             |             |
| ZBTB80S      | ZBTB80S      | 2236.147837 | 2125.632495 | 1633.033172 |             |
| 1521.605319  |              |             |             |             |             |
| DUS4L        | DUS4L        | 407.6372171 | 352.4101652 | 349.9994552 |             |
| 350.7045716  |              |             |             |             |             |
| RAB21        | RAB21        | 3673.420439 | 2163.209371 | 2258.925055 |             |
| 2460.588527  |              |             |             |             |             |
| LOC101926963 | LOC101926963 |             | 190.9335241 | 229.5236234 |             |
| 183.0354294  |              | 220.6044886 |             |             |             |
| MUC1         | MUC1         | 73.79639275 | 103.5903079 | 33.03566286 |             |
| 27.33987252  |              |             |             |             |             |
| GPR35        | GPR35        | 78.481878   | 168.5881482 | 158.928324  |             |
| 80.1341091   |              |             |             |             |             |
| PRMT1        | PRMT1        | 11663.34417 | 15984.39075 | 11070.51848 |             |

|             |            |             |             |             |             |
|-------------|------------|-------------|-------------|-------------|-------------|
| 11484.63197 |            |             |             |             |             |
| DDX19A      | DDX19A     | 3631.251072 | 4350.792932 | 3996.422351 |             |
| 3683.340756 |            |             |             |             |             |
| LRRC48      | LRRC48     | 35.1411394  | 44.68601518 | 133.928363  |             |
| 57.50800771 |            |             |             |             |             |
| TBC1D9B     | TBC1D9B    | 5383.622557 | 5754.340045 | 4830.349624 |             |
| 6414.499745 |            |             |             |             |             |
| CLIP3       | CLIP3      | 227.2460348 | 244.7574922 | 201.7854002 |             |
| 153.6689386 |            |             |             |             |             |
| PPP4R4      | PPP4R4     | 4.685485254 | 0           | 40.17850889 | 77.30584643 |
| SEZ6L       | SEZ6L      | 0           | 2.031182508 | 1.785711506 | 0           |
| TRAK2       | TRAK2      | 4139.626222 | 5367.399778 | 3714.279933 |             |
| 4123.606979 |            |             |             |             |             |
| PCDHGA5     | PCDHGA5    | 0           | 14.21827756 | 9.821413283 | 12.25580492 |
| ABCC6       | ABCC6      | 12.88508445 | 11.17150379 | 14.28569205 |             |
| 3.771016899 |            |             |             |             |             |
| ZNF506      | ZNF506     | 431.0646434 | 459.0472468 | 1930.354138 |             |
| 1478.238624 |            |             |             |             |             |
| PAK3        | PAK3       | 32.79839678 | 42.65483267 | 36.60708587 |             |
| 85.79063445 |            |             |             |             |             |
| AGPAT1      | AGPAT1     | 196.7903807 | 62.96665775 | 35.71423012 |             |
| 143.2986422 |            |             |             |             |             |
| FARP2       | FARP2      | 679.3953618 | 783.0208569 | 524.106327  |             |
| 692.9243552 |            |             |             |             |             |
| PRDX4       | PRDX4      | 2149.46636  | 2194.6927   | 2031.246838 |             |
| 2434.191408 |            |             |             |             |             |
| ST6GALNAC2  | ST6GALNAC2 |             | 30.45565415 | 9.140321286 |             |
| 112.4998249 |            | 111.2449985 |             |             |             |
| DENND3      | DENND3     | 1429.073002 | 1679.787934 | 718.7488812 |             |
| 759.8599051 |            |             |             |             |             |
| BTBD3       | BTBD3      | 350.2400227 | 220.3833021 | 39.28565313 |             |
| 245.1160984 |            |             |             |             |             |
| PPRC1       | PPRC1      | 5340.281818 | 5349.119135 | 5951.77645  |             |
| 5906.355218 |            |             |             |             |             |
| C9orf9      | C9orf9     | 81.99599194 | 89.37203036 | 49.99992217 |             |
| 80.1341091  |            |             |             |             |             |
| NDRG4       | NDRG4      | 65.59679355 | 35.54569389 | 33.92851862 |             |
| 21.68334717 |            |             |             |             |             |
| OTUB2       | OTUB2      | 1129.201946 | 840.9095584 | 186.6068524 |             |
| 418.5828758 |            |             |             |             |             |
| C15orf40    | C15orf40   |             | 1839.052962 | 2814.203365 |             |
| 2430.35336  |            | 2223.957216 |             |             |             |
| KCTD1       | KCTD1      | 10.54234182 | 8.124730032 | 0           | 7.542033798 |
| TRIM46      | TRIM46     | 277.6150013 | 244.7574922 | 151.785478  |             |
| 197.9783872 |            |             |             |             |             |
| PRKACB      | PRKACB     | 6920.46172  | 4638.205257 | 5948.205027 |             |
| 6039.283564 |            |             |             |             |             |
| CHN1        | CHN1       | 134.707701  | 138.1204106 | 471.4278376 |             |
| 380.8727068 |            |             |             |             |             |
| SORCS1      | SORCS1     | 0           | 0           | 1.785711506 | 0           |

|              |              |             |             |             |   |
|--------------|--------------|-------------|-------------|-------------|---|
| GYPC         | GYPC         | 5336.767704 | 5915.819055 | 3064.280944 |   |
| 3033.783095  |              |             |             |             |   |
| ENC1         | ENC1         | 117.1371313 | 32.49892013 | 14.28569205 |   |
| 94.27542247  |              |             |             |             |   |
| RPAP3        | RPAP3        | 2513.762839 | 2829.437234 | 2752.674287 |   |
| 2523.75306   |              |             |             |             |   |
| TRMT10A      | TRMT10A      | 661.8247921 | 593.1052924 | 373.2137048 |   |
| 503.430756   |              |             |             |             |   |
| MEPE         | MEPE         | 0           | 0           | 3.771016899 |   |
| HADH         | HADH         | 2799.577439 | 3451.994673 | 2850.888419 |   |
| 3087.520086  |              |             |             |             |   |
| LOC100505915 | LOC100505915 |             | 37.48388203 | 14.21827756 |   |
| 46.42849916  | 31.11088942  |             |             |             |   |
| SPIN3        | SPIN3        | 275.2722587 | 168.5881482 | 305.3566675 |   |
| 705.1801601  |              |             |             |             |   |
| GTF2IRD2B    | GTF2IRD2B    |             | 105.4234182 | 182.8064257 |   |
| 603.570489   | 289.425547   |             |             |             |   |
| RAP1GDS1     | RAP1GDS1     |             | 5114.207155 | 5790.901331 |   |
| 3073.209502  | 3853.979271  |             |             |             |   |
| C14orf132    | C14orf132    |             | 22.25605496 | 26.40537261 |   |
| 129.4640842  | 178.1805485  |             |             |             |   |
| PCBP2        | PCBP2        | 3310.295332 | 2764.439394 | 3238.387816 |   |
| 3141.257077  |              |             |             |             |   |
| LEPROTL1     | LEPROTL1     |             | 9722.381902 | 8107.464981 |   |
| 14623.19152  | 13276.80775  |             |             |             |   |
| THSD7B       | THSD7B       | 0           | 1.785711506 | 0           |   |
| FAM110A      | FAM110A      | 1098.746292 | 1904.233601 | 1061.60549  |   |
| 857.9063445  |              |             |             |             |   |
| PHTF2        | PHTF2        | 5496.074203 | 7204.604356 | 3225.887836 |   |
| 3387.315929  |              |             |             |             |   |
| BCOR         | BCOR         | 2928.428284 | 2052.509924 | 2958.923966 |   |
| 2159.849929  |              |             |             |             |   |
| NATD1        | NATD1        | 298.6996849 | 127.964498  | 511.6063465 |   |
| 419.52563    |              |             |             |             |   |
| SEC63        | SEC63        | 3175.587631 | 2544.056091 | 3430.351803 |   |
| 3321.323134  |              |             |             |             |   |
| NUTM2F       | NUTM2F       | 0           | 0           | 0.942754225 |   |
| GORASP2      | GORASP2      | 7275.387228 | 9268.285784 | 10065.1629  |   |
| 8671.453359  |              |             |             |             |   |
| SLC25A13     | SLC25A13     |             | 653.6251929 | 682.4773227 |   |
| 458.0350013  | 586.3931278  |             |             |             |   |
| ACSM5        | ACSM5        | 0           | 2.678567259 | 0           |   |
| GCNT1        | GCNT1        | 1088.20395  | 1412.687434 | 1219.640959 |   |
| 784.371515   |              |             |             |             |   |
| OCM          | OCM          | 2.342742627 | 4.062365016 | 33.92851862 |   |
| 27.33987252  |              |             |             |             |   |
| LINCR-0003   | LINCR-0003   |             | 2.342742627 | 0           | 0 |
| SH3D19       | SH3D19       | 4.685485254 | 3.046773762 | 10.71426904 | 0 |
| 24.51160984  |              |             |             |             |   |
| ZC3H12B      | ZC3H12B      | 64.42542224 | 49.76397145 | 131.2497957 |   |

|             |         |             |             |             |
|-------------|---------|-------------|-------------|-------------|
| 164.0392351 |         |             |             |             |
| ZCCHC11     | ZCCHC11 | 1953.847351 | 1213.631549 | 2382.139149 |
| 2542.608144 |         |             |             |             |
| NT5DC2      | NT5DC2  | 1277.966103 | 787.0832219 | 471.4278376 |
| 611.8474918 |         |             |             |             |
| MEIS2       | MEIS2   | 1.171371313 | 0           | 0           |
| GFM2        | GFM2    | 4069.343943 | 4737.7332   | 3339.280516 |
| 3867.17783  |         |             |             |             |
| P2RX2       | P2RX2   | 0           | 0           | 1.885508449 |
| RPLP0       | RPLP0   | 31368.1524  | 39179.4794  | 32745.48474 |
| 30422.67883 |         |             |             |             |
| COPS7B      | COPS7B  | 2773.80727  | 3469.259724 | 2480.353282 |
| 2143.823107 |         |             |             |             |
| SLC46A2     | SLC46A2 | 0           | 0           | 11.3130507  |
| DGCR8       | DGCR8   | 1509.897623 | 1703.146533 | 1134.819662 |
| 786.2570234 |         |             |             |             |
| FAM122C     | FAM122C | 550.5445173 | 369.6752165 | 402.6779446 |
| 621.2750341 |         |             |             |             |
| LRG1        | LRG1    | 124.1653592 | 324.9892013 | 452.6778668 |
| 64.10728728 |         |             |             |             |
| RPL39L      | RPL39L  | 709.851016  | 994.2638377 | 612.4990466 |
| 551.5112215 |         |             |             |             |
| ATP8B3      | ATP8B3  | 221.3891782 | 415.3768229 | 84.82129654 |
| 80.1341091  |         |             |             |             |
| SYNRG       | SYNRG   | 7434.693727 | 6006.206676 | 6382.132923 |
| 6669.043386 |         |             |             |             |
| HHAT        | HHAT    | 65.59679355 | 77.18493531 | 67.85703723 |
| 152.7261844 |         |             |             |             |
| CELF5       | CELF5   | 1.171371313 | 0           | 4.464278765 |
| SYNCRIP     | SYNCRIP | 12017.0983  | 13977.58243 | 2.828262674 |
| 10438.17478 |         |             |             | 8641.057978 |
| RABL2B      | RABL2B  | 832.8450039 | 961.7649176 | 1277.676583 |
| 1194.469603 |         |             |             |             |
| MANSC4      | MANSC4  | 0           | 2.031182508 | 5.357134518 |
| ZFAT        | ZFAT    | 402.9517318 | 328.0359751 | 5.656525348 |
| 391.2430033 |         |             |             |             |
| KDM4C       | KDM4C   | 1978.446148 | 2271.877635 | 4133.029281 |
| 3459.908005 |         |             |             |             |
| KDM5D       | KDM5D   | 3683.962781 | 0           | 0           |
| SPOP        | SPOP    | 4159.539534 | 4935.773495 | 3655.058129 |
| 5807.366024 |         |             |             | 5979.454978 |
| ERAP1       | ERAP1   | 4981.842196 | 5502.473414 | 5590.16987  |
| 6729.379656 |         |             |             |             |
| STRBP       | STRBP   | 2957.712566 | 4356.88648  | 3728.565625 |
| 3138.428814 |         |             |             |             |
| HCRTR1      | HCRTR1  | 0           | 3.046773762 | 1.785711506 |
| RPL36A      | RPL36A  | 4609.346118 | 4197.438653 | 0           |
| 6232.54818  |         |             |             | 6476.775632 |
| IL4R        | IL4R    | 9540.819348 | 6984.221054 | 9589.270788 |
| 11573.25086 |         |             |             |             |

|                 |               |             |             |             |
|-----------------|---------------|-------------|-------------|-------------|
| C10orf10        | C10orf10      | 63.25405093 | 322.9580188 |             |
| 91.96414256     | 141.4131337   |             |             |             |
| PITX3 PITX3     | 5.856856567   | 2.031182508 | 18.74997081 | 0           |
| HEXB HEXB       | 5378.937071   | 6375.881893 | 4949.992295 |             |
| 5012.624213     |               |             |             |             |
| HSD17B1 HSD17B1 | 350.2400227   | 173.6661044 | 217.8568037 |             |
| 234.745802      |               |             |             |             |
| GTF2H4 GTF2H4   | 0 7.109138778 | 8.035701777 | 0           |             |
| SLC26A3 SLC26A3 | 0 2.031182508 | 0           | 2.828262674 |             |
| ASGR1 ASGR1     | 1.171371313   | 27.42096386 | 0 0         |             |
| SLC26A2 SLC26A2 | 933.5829368   | 786.0676306 | 1268.748025 |             |
| 1012.518037     |               |             |             |             |
| SERPING1        | SERPING1      | 0 0         | 76.78559476 | 0           |
| BTK BTK         | 2.342742627   | 9.140321286 | 0           | 9.427542247 |
| LCAT LCAT       | 97.22381902   | 69.06020528 | 121.4283824 |             |
| 78.24860065     |               |             |             |             |
| ACBD5 ACBD5     | 2423.567248   | 2270.862044 | 1942.854119 |             |
| 2049.547685     |               |             |             |             |
| LAMB2 LAMB2     | 0 3.046773762 | 50.89277792 | 0           |             |
| RAB3IP RAB3IP   | 841.0446031   | 1245.114877 | 2039.28254  |             |
| 1297.229813     |               |             |             |             |
| GRIN3B GRIN3B   | 705.1655307   | 460.0628381 | 506.249212  |             |
| 567.5380433     |               |             |             |             |
| GLIPR1L2        | GLIPR1L2      | 12.88508445 | 12.18709505 |             |
| 41.96422039     | 37.71016899   |             |             |             |
| JAM2 JAM2       | 25.7701689    | 19.29623383 | 44.64278765 |             |
| 56.56525348     |               |             |             |             |
| CCL3L3 CCL3L3   | 26.94154021   | 18.28064257 | 174.1068718 |             |
| 68.8210584      |               |             |             |             |
| ZBTB44 ZBTB44   | 445.1210991   | 193.9779295 | 241.9639091 |             |
| 541.140925      |               |             |             |             |
| DNASE1L3        | DNASE1L3      | 0 0         | 0           | 1.885508449 |
| NEIL1 NEIL1     | 16.39919839   | 12.18709505 | 28.5713841  |             |
| 43.36669434     |               |             |             |             |
| MPP5 MPP5       | 703.9941594   | 550.4504597 | 399.9993774 |             |
| 450.6365194     |               |             |             |             |
| PPP1R12C        | PPP1R12C      | 906.6413966 | 496.6241232 |             |
| 506.249212      | 601.4771954   |             |             |             |
| IDNK IDNK       | 509.5465214   | 598.1832486 | 490.1778084 |             |
| 509.0872813     |               |             |             |             |
| 4-Sep 4-Sep     | 4.685485254   | 8.124730032 | 0           | 32.99639787 |
| SEN3-EIF4A1     | SEN3-EIF4A1   | 23119.35561 | 29122.07921 |             |
| 21651.75201     | 22538.42525   |             |             |             |
| CMTM3 CMTM3     | 6854.864926   | 8251.678939 | 5042.849293 |             |
| 5311.477302     |               |             |             |             |
| MRPS14 MRPS14   | 3386.434467   | 3745.500545 | 2926.781158 |             |
| 3147.856356     |               |             |             |             |
| CLEC2D CLEC2D   | 25683.48742   | 24876.90777 | 18240.15018 |             |
| 24079.82841     |               |             |             |             |
| CES2 CES2       | 2773.80727    | 3141.223749 | 3848.208296 |             |

|                |                |             |             |             |
|----------------|----------------|-------------|-------------|-------------|
| 3579.637791    |                |             |             |             |
| LEMD1          | LEMD1          | 1.171371313 | 0           | 0           |
| 0.942754225    |                |             |             |             |
| OSBPL9         | OSBPL9         | 4923.27363  | 5994.019581 | 4729.456924 |
| 5262.454082    |                |             |             |             |
| EEF1E1-BLOC1S5 | EEF1E1-BLOC1S5 | 5054.467218 |             | 5858.945945 |
| 4880.349546    |                | 5361.443276 |             |             |
| BLOC1S5-TXNDC5 | BLOC1S5-TXNDC5 | 8262.853245 |             | 10091.93029 |
| 6083.919101    |                | 6582.309997 |             |             |
| SUMF2          | SUMF2          | 3872.553562 | 7134.52856  | 6693.73958  |
| 4331.012908    |                |             |             |             |
| RBM18          | RBM18          | 2994.025077 | 3076.225909 | 2793.745651 |
| 2865.030089    |                |             |             |             |
| PIGQ           | PIGQ           | 1679.746464 | 1671.663204 | 1576.78326  |
| 1267.061678    |                |             |             |             |
| ZNF628         | ZNF628         | 24.59879758 | 3.046773762 | 8.92855753  |
| 4.713771124    |                |             |             |             |
| GTF2I          | GTF2I          | 4780.36633  | 5815.275521 | 4013.38661  |
| 3805.898805    |                |             |             |             |
| KCNJ12         | KCNJ12         | 8.199599194 | 14.21827756 | 0           |
| 0              |                |             |             | 0           |
| CERK           | CERK           | 9647.414138 | 8570.574593 | 5319.634577 |
| 8265.126288    |                |             |             |             |
| DACT2          | DACT2          | 0           | 4.062365016 | 0           |
| 0              |                |             |             | 0           |
| GCK            | GCK            | 2.342742627 | 15.23386881 | 173.2140161 |
| 18.85508449    |                |             |             |             |
| HK1            | HK1            | 22381.39169 | 29447.06841 | 17804.43657 |
| 18215.89713    |                |             |             |             |
| SNX31          | SNX31          | 0           | 0           | 1.785711506 |
| 0              |                |             |             | 0           |
| ZNF366         | ZNF366         | 0           | 0           | 12.25580492 |
| 0              |                |             |             |             |
| MYLK           | MYLK           | 63.25405093 | 48.74838019 | 8.035701777 |
| 46.19495701    |                |             |             |             |
| MTRR           | MTRR           | 5273.513653 | 5151.078841 | 4187.493482 |
| 4107.580157    |                |             |             |             |
| UPF3B          | UPF3B          | 1119.830976 | 1044.027809 | 1487.497685 |
| 1348.138541    |                |             |             |             |
| TBPL2          | TBPL2          | 0           | 0           | 2.678567259 |
| 0              |                |             |             | 0           |
| CACUL1         | CACUL1         | 2363.827311 | 1920.483061 | 2073.211059 |
| 2209.815903    |                |             |             |             |
| RUSC1          | RUSC1          | 1145.601145 | 1271.52025  | 1234.819506 |
| 1174.671764    |                |             |             |             |
| NDE1           | NDE1           | 3854.982993 | 4581.332147 | 3493.744562 |
| 3344.891989    |                |             |             |             |
| GSTT2          | GSTT2          | 1.171371313 | 0           | 0           |
| 0              |                |             |             | 0           |
| SCGB1A1        | SCGB1A1        | 11.71371313 | 27.42096386 | 4.464278765 |
| 16.02682182    |                |             |             |             |
| PSMD11         | PSMD11         | 13018.62078 | 19429.27628 | 11129.44696 |
| 11077.36214    |                |             |             |             |
| NAT9           | NAT9           | 1005.036587 | 1120.197153 | 2400.88912  |
| 1896.8215      |                |             |             |             |
| ENSA           | ENSA           | 5655.380701 | 3818.623115 | 4002.672341 |
| 3619.233469    |                |             |             |             |

|           |           |             |             |             |             |
|-----------|-----------|-------------|-------------|-------------|-------------|
| TCF12     | TCF12     | 4312.989176 | 4237.046712 | 3543.744484 |             |
|           |           | 3882.261897 |             |             |             |
| RNF128    | RNF128    | 0           | 0           | 6.599279573 |             |
| TMEM177   | TMEM177   | 819.9599194 | 1188.241767 | 766.0702361 |             |
|           |           | 983.2926564 |             |             |             |
| XRCC3     | XRCC3     | 2044.042942 | 2347.031388 | 1150.891066 |             |
|           |           | 1366.993626 |             |             |             |
| SLC45A4   | SLC45A4   | 470.891268  | 285.3811424 | 446.4278765 |             |
|           |           | 431.7814349 |             |             |             |
| SAMD12    | SAMD12    | 17.5705697  | 32.49892013 | 108.9284019 |             |
|           |           | 82.01961755 |             |             |             |
| TOX2      | TOX2      | 1055.405553 | 261.0069523 | 141.9640647 |             |
|           |           | 287.5400385 |             |             |             |
| GPSM1     | GPSM1     | 169.8488405 | 193.9779295 | 83.03558503 |             |
|           |           | 163.0964809 |             |             |             |
| CPSF7     | CPSF7     | 3184.958601 | 1426.905712 | 1633.033172 |             |
|           |           | 1589.483623 |             |             |             |
| CHID1     | CHID1     | 2612.158029 | 3986.195672 | 3207.137865 |             |
|           |           | 2772.640175 |             |             |             |
| VGLL4     | VGLL4     | 2101.440136 | 1740.723409 | 1274.998015 |             |
|           |           | 1581.941589 |             |             |             |
| TUBGCP5   | TUBGCP5   | 1501.698024 | 1780.331468 | 1446.42632  |             |
|           |           | 1470.696591 |             |             |             |
| RPS15A    | RPS15A    | 10867.98305 | 9891.858814 | 10484.80511 |             |
|           |           | 10572.98863 |             |             |             |
| TMEM254   | TMEM254   | 1005.036587 | 1141.52457  | 1278.569438 |             |
|           |           | 1170.900747 |             |             |             |
| LINC00957 | LINC00957 |             | 52.71170911 | 60.93547524 |             |
|           |           | 99.99984434 | 65.99279573 |             |             |
| SGK3      | SGK3      | 265.9012882 | 314.8332888 | 2438.389062 |             |
|           |           | 2041.062897 |             |             |             |
| GRK4      | GRK4      | 32.79839678 | 29.45214637 | 91.96414256 |             |
|           |           | 37.71016899 |             |             |             |
| CAPN3     | CAPN3     | 39.82662466 | 61.9510665  | 190.1782754 |             |
|           |           | 121.615295  |             |             |             |
| PFDN2     | PFDN2     | 2391.940222 | 2869.045293 | 2712.495778 |             |
|           |           | 2496.413187 |             |             |             |
| HBQ1      | HBQ1      | 0           | 2.031182508 | 3.571423012 | 1.885508449 |
| HBE1      | HBE1      | 0           | 1.015591254 | 0           | 0           |
| ZNF26     | ZNF26     | 15.22782708 | 19.29623383 | 33.92851862 |             |
|           |           | 25.45436407 |             |             |             |
| NCAPH2    | NCAPH2    | 8634.177952 | 11683.36179 | 8313.379916 |             |
|           |           | 7567.488162 |             |             |             |
| ARHGEF25  | ARHGEF25  |             | 0           | 0           | 0.942754225 |
| ENPP7     | ENPP7     | 0           | 2.031182508 | 5.357134518 | 1.885508449 |
| BHLHA15   | BHLHA15   | 1.171371313 | 2.031182508 | 0           | 0           |
| TRAPPC6B  | TRAPPC6B  |             | 2372.02691  | 1885.952959 |             |
|           |           | 2050.889665 | 2050.490439 |             |             |
| VHL       | VHL       | 4105.656454 | 2463.824382 | 1845.532842 |             |
|           |           | 2417.221832 |             |             |             |



|                 |               |             |               |   |
|-----------------|---------------|-------------|---------------|---|
| C21orf33        | C21orf33      | 3802.271283 | 4954.054137   |   |
| 2883.031227     | 2707.590133   |             |               |   |
| PSMD13 PSMD13   | 13490.68342   | 20816.57393 | 11537.48204   |   |
| 10088.41296     |               |             |               |   |
| LCE1E LCE1E     | 0 1.015591254 | 2.678567259 | 0             |   |
| LCE1B LCE1B     | 0 0           | 16.96425931 | 0             |   |
| SLC25A44        | SLC25A44      | 3806.956769 | 4901.243392   |   |
| 2757.138565     | 3530.614572   |             |               |   |
| IP013 IP013     | 2268.946234   | 2200.786248 | 2074.103914   |   |
| 1521.605319     |               |             |               |   |
| IREB2 IREB2     | 3914.72293    | 2153.053459 | 2428.567648   |   |
| 3143.142585     |               |             |               |   |
| PRKAR2A PRKAR2A | 654.7965642   | 890.6735298 | 716.0703139   |   |
| 921.0708775     |               |             |               |   |
| ORC1 ORC1       | 4131.426623   | 4508.209577 | 1401.783532   |   |
| 1883.622941     |               |             |               |   |
| USP40 USP40     | 524.7743484   | 560.6063722 | 609.8204793   |   |
| 500.6024933     |               |             |               |   |
| NT5C1A NT5C1A   | 1.171371313   | 18.28064257 | 5.357134518   | 0 |
| KPNA6 KPNA6     | 6578.421296   | 5028.192299 | 4430.350247   |   |
| 5130.468491     |               |             |               |   |
| SATB1 SATB1     | 6710.786255   | 7472.720447 | 15035.69088   |   |
| 20223.02087     |               |             |               |   |
| POP5 POP5       | 2181.093386   | 2285.080322 | 1672.318825   |   |
| 1959.043279     |               |             |               |   |
| TWF2 TWF2       | 7117.252101   | 10083.80556 | 5499.991439   |   |
| 6237.261951     |               |             |               |   |
| XIRP1 XIRP1     | 72.62502143   | 184.8376082 | 416.9636367   |   |
| 76.3630922      |               |             |               |   |
| SASS6 SASS6     | 1056.576925   | 732.2412942 | 444.642165    |   |
| 673.1265164     |               |             |               |   |
| DNAJC21 DNAJC21 | 3159.188432   | 3415.433387 | 3475.887447   |   |
| 3642.802324     |               |             |               |   |
| STEAP3 STEAP3   | 4.685485254   | 18.28064257 | 0 11.3130507  |   |
| EI24 EI24       | 3473.115944   | 4159.861777 | 4056.243686   |   |
| 3865.292321     |               |             |               |   |
| EYA3 EYA3       | 2217.405896   | 1313.159491 | 1098.212576   |   |
| 1466.925574     |               |             |               |   |
| TMEM9B TMEM9B   | 3696.847865   | 4522.427854 | 4767.849721   |   |
| 4326.299137     |               |             |               |   |
| SIK3 SIK3       | 2811.291152   | 2176.412057 | 3635.708626   |   |
| 3170.482458     |               |             |               |   |
| FLVCR1 FLVCR1   | 659.4820495   | 589.0429273 | 320.5352153   |   |
| 484.5756715     |               |             |               |   |
| TPD52L2 TPD52L2 | 6640.503976   | 9182.976119 | 7487.488345   |   |
| 6328.709111     |               |             |               |   |
| GSG1 GSG1       | 2.342742627   | 3.046773762 | 0 0.942754225 |   |
| C4orf19 C4orf19 | 38.65525334   | 29.45214637 | 28.5713841    |   |
| 16.02682182     |               |             |               |   |
| PRSS1 PRSS1     | 0 8.124730032 | 0           | 5.656525348   |   |

|              |              |             |             |             |             |
|--------------|--------------|-------------|-------------|-------------|-------------|
| ARHGAP6      | ARHGAP6      | 0           | 0           | 4.464278765 | 0           |
| BAZ2A        | BAZ2A        | 5868.57028  |             | 3557.616163 | 5749.99105  |
| 5416.123021  |              |             |             |             |             |
| IST1         | IST1         | 8930.534894 |             | 10571.28936 | 12409.80211 |
| 10753.99744  |              |             |             |             |             |
| COPA         | COPA         | 24077.53735 |             | 27912.51003 | 21195.50272 |
| 20765.10455  |              |             |             |             |             |
| HACL1        | HACL1        | 2629.728599 |             | 3443.869942 | 3464.280322 |
| 3173.31072   |              |             |             |             |             |
| SLC27A5      | SLC27A5      | 249.5020898 |             | 223.4300759 | 292.856687  |
| 246.0588527  |              |             |             |             |             |
| CIB2         | CIB2         | 85.51010588 |             | 75.1537528  | 124.9998054 |
| 60.33627038  |              |             |             |             |             |
| CHAT         | CHAT         | 0           | 1.015591254 | 0           | 0           |
| COG5         | COG5         | 3268.125965 |             | 2893.419483 | 7102.667515 |
| 6458.809194  |              |             |             |             |             |
| ART5         | ART5         | 0           | 0           | 1.785711506 | 4.713771124 |
| ARHGAP32     | ARHGAP32     |             |             | 51.54033779 | 10.15591254 |
| 183.9282851  | 255.4863949  |             |             |             |             |
| LIN7C        | LIN7C        | 4173.59599  |             | 2855.842606 | 3274.994902 |
| 4135.862784  |              |             |             |             |             |
| IFT140       | IFT140       | 345.5545375 |             | 365.6128515 | 351.7851667 |
| 425.1821553  |              |             |             |             |             |
| NLGN4Y       | NLGN4Y       | 53.88308042 |             | 0           | 0           |
| BDNF         | BDNF         | 18.74194102 |             | 3.046773762 | 34.82137437 |
| 7.542033798  |              |             |             |             |             |
| LOC100505478 | LOC100505478 |             |             | 40.99799597 | 38.59246765 |
| 18.74997081  | 48.08046546  |             |             |             |             |
| CCDC169      | CCDC169      | 12.88508445 |             | 2.031182508 | 0           |
| ACSL6        | ACSL6        | 417.0081876 |             | 423.5015529 | 4.713771124 |
| 358.2466054  |              |             |             |             | 778.5702166 |
| GEMIN2       | GEMIN2       | 1153.800744 |             | 1036.91867  | 612.4990466 |
| 822.081684   |              |             |             |             |             |
| TLK1         | TLK1         | 4734.682849 |             | 1840.251352 | 2980.352504 |
| 4305.558544  |              |             |             |             |             |
| COP2         | COP2         | 2286.516804 |             | 2039.307238 | 1916.068446 |
| 2159.849929  |              |             |             |             |             |
| KIAA0319     | KIAA0319     |             |             | 19.91331233 | 7.109138778 |
| 43.7499319   | 1.885508449  |             |             |             |             |
| SNORD7       | SNORD7       | 1.171371313 |             | 0           | 3.571423012 |
| IGBP1P1      | IGBP1P1      | 5.856856567 |             | 3.046773762 | 0.942754225 |
| 10.37029647  |              |             |             |             | 29.46423985 |
| NNAT         | NNAT         | 11.71371313 |             | 20.31182508 | 23.21424958 |
| 15.0840676   |              |             |             |             |             |
| PPP2R2B      | PPP2R2B      | 62.08267961 |             | 13.2026863  | 91.96414256 |
| 108.4167358  |              |             |             |             |             |
| UROC1        | UROC1        | 0           | 1.015591254 | 0           | 0           |
| MLF2         | MLF2         | 8102.375375 |             | 10628.16247 | 9814.270437 |
| 9063.639116  |              |             |             |             |             |
| IFI35        | IFI35        | 6921.633091 |             | 8647.759528 | 6481.239911 |

|             |             |             |             |             |             |
|-------------|-------------|-------------|-------------|-------------|-------------|
| 6033.627038 |             |             |             |             |             |
| VCL         | VCL         | 3630.0797   | 2759.361437 | 2626.781625 |             |
| 2646.311109 |             |             |             |             |             |
| BMPR1B      | BMPR1B      | 21.08468364 | 1.015591254 | 0           | 5.656525348 |
| BMP4        | BMP4        | 1.171371313 | 1.015591254 | 74.99988325 |             |
| 6.599279573 |             |             |             |             |             |
| TNFRSF17    | TNFRSF17    |             | 3.51411394  | 0           | 2.678567259 |
| 0           |             |             |             |             |             |
| BCL2L1      | BCL2L1      | 3498.886113 | 3407.308657 | 2767.852834 |             |
| 2144.765861 |             |             |             |             |             |
| ST3GAL3     | ST3GAL3     | 391.2380187 | 360.5348952 | 360.7137242 |             |
| 473.2626208 |             |             |             |             |             |
| EBLN3       | EBLN3       | 1429.073002 | 1110.041241 | 2441.960485 |             |
| 2103.284675 |             |             |             |             |             |
| RPL18       | RPL18       | 12290.02782 | 14264.99475 | 15847.29676 |             |
| 12861.99589 |             |             |             |             |             |
| IFF01       | IFF01       | 1895.278785 | 1795.565337 | 1185.71244  |             |
| 1331.168965 |             |             |             |             |             |
| FLJ27354    | FLJ27354    |             | 174.5343257 | 108.6682642 |             |
| 109.8212576 | 130.100083  |             |             |             |             |
| PWAR5       | PWAR5       | 23.42742627 | 17.26505132 | 31.24995136 |             |
| 34.88190631 |             |             |             |             |             |
| PBX3        | PBX3        | 301.0424276 | 236.6327622 | 426.7850499 |             |
| 600.5344411 |             |             |             |             |             |
| HSD17B7P2   | HSD17B7P2   |             | 224.9032922 | 72.10697904 |             |
| 292.856687  | 388.4147406 |             |             |             |             |
| PPIE        | PPIE        | 3894.809617 | 4374.151531 | 3499.994552 |             |
| 3893.574948 |             |             |             |             |             |
| CARS        | CARS        | 6323.06235  | 8651.821893 | 8412.486905 |             |
| 7839.001379 |             |             |             |             |             |
| CMPK2       | CMPK2       | 2243.176065 | 3098.568916 | 8209.808649 |             |
| 4822.187859 |             |             |             |             |             |
| WDR92       | WDR92       | 944.1252786 | 1155.742847 | 816.0701583 |             |
| 744.7758375 |             |             |             |             |             |
| GPX2        | GPX2        | 4.685485254 | 11.17150379 | 22.32139383 |             |
| 21.68334717 |             |             |             |             |             |
| FAM166B     | FAM166B     | 2.342742627 | 0           | 0           | 2.828262674 |
| NUDT16P1    | NUDT16P1    |             | 8.199599194 | 29.45214637 |             |
| 27.67852834 | 19.79783872 |             |             |             |             |
| TCAM1P      | TCAM1P      | 0           | 11.17150379 | 0           | 6.599279573 |
| MMP23A      | MMP23A      | 2.342742627 | 0           | 0.892855753 | 3.771016899 |
| LOC284379   | LOC284379   |             | 1.171371313 | 0           | 0           |
| 0.942754225 |             |             |             |             |             |
| FABP5P3     | FABP5P3     | 2.342742627 | 0           | 2.678567259 | 0           |
| LOC441601   | LOC441601   |             | 0           | 8.124730032 | 16.96425931 |
| 0           |             |             |             |             |             |
| SCART1      | SCART1      | 39.82662466 | 8.124730032 | 12.49998054 |             |
| 26.39711829 |             |             |             |             |             |
| SGCA        | SGCA        | 0           | 13.2026863  | 0           | 4.713771124 |
| ADA         | ADA         | 6321.890979 | 5414.116975 | 2829.459881 |             |

|               |               |             |             |             |             |
|---------------|---------------|-------------|-------------|-------------|-------------|
| 4465.826762   |               |             |             |             |             |
| KCNAB2        | KCNAB2        | 8484.242423 | 3836.903758 | 2312.4964   |             |
| 3235.532499   |               |             |             |             |             |
| JMJD7-PLA2G4B | JMJD7-PLA2G4B |             | 729.7643283 | 497.6397145 |             |
| 1048.212654   |               | 916.3571064 |             |             |             |
| CYP21A2       | CYP21A2       | 1.171371313 | 0           | 0           | 0           |
| MAG           | MAG           | 0           | 0           | 3.771016899 |             |
| ATP5G3        | ATP5G3        | 21556.74628 | 24458.48417 | 11124.08983 |             |
| 14123.40104   |               |             |             |             |             |
| YJEFN3        | YJEFN3        | 63.25405093 | 57.88870148 | 52.67848943 |             |
| 45.25220279   |               |             |             |             |             |
| PFDN1         | PFDN1         | 5544.100427 | 8003.874673 | 4273.207634 |             |
| 4426.231085   |               |             |             |             |             |
| NUBP1         | NUBP1         | 2094.411908 | 2826.39046  | 1903.568465 |             |
| 1621.537267   |               |             |             |             |             |
| APBA2         | APBA2         | 71.45365012 | 63.98224901 | 3110.709444 |             |
| 1652.648156   |               |             |             |             |             |
| KCTD9         | KCTD9         | 933.5829368 | 1046.058992 | 666.9632475 |             |
| 585.4503735   |               |             |             |             |             |
| DDX60         | DDX60         | 4026.003204 | 3249.892013 | 13116.94387 |             |
| 9186.197166   |               |             |             |             |             |
| RXRB          | RXRB          | 19.91331233 | 16.24946006 | 15.1785478  |             |
| 15.0840676    |               |             |             |             |             |
| LUZP1         | LUZP1         | 1410.331061 | 1392.375609 | 1979.461204 |             |
| 1973.184592   |               |             |             |             |             |
| RPL34         | RPL34         | 7520.203832 | 7240.15005  | 13074.08679 |             |
| 10435.34651   |               |             |             |             |             |
| FBX021        | FBX021        | 2988.168221 | 3158.4888   | 4196.422039 |             |
| 4111.351174   |               |             |             |             |             |
| LOC100288798  | LOC100288798  |             | 124.1653592 | 86.32525659 |             |
| 46.42849916   |               | 45.25220279 |             |             |             |
| FAM111A       | FAM111A       | 7330.44168  | 5727.934673 | 4702.671251 |             |
| 6584.195505   |               |             |             |             |             |
| FADS3         | FADS3         | 92.53833376 | 183.822017  | 178.5711506 |             |
| 201.7494041   |               |             |             |             |             |
| MBD6          | MBD6          | 208.5040938 | 66.01343151 | 97.32127708 |             |
| 75.42033798   |               |             |             |             |             |
| EGFEM1P       | EGFEM1P       | 5.856856567 | 0           | 0           | 0           |
| LOC392196     | LOC392196     |             | 0           | 0           | 6.599279573 |
| CCDC152       | CCDC152       | 337.3549383 | 112.7306292 | 239.2853418 |             |
| 472.3198666   |               |             |             |             |             |
| AKR1B15       | AKR1B15       | 0           | 0           | 1.885508449 |             |
| CLGN          | CLGN          | 17.5705697  | 13.2026863  | 8.035701777 |             |
| 1.885508449   |               |             |             |             |             |
| KIAA0391      | KIAA0391      |             | 3920.579786 | 4013.616636 |             |
| 2531.24606    |               | 3467.450039 |             |             |             |
| WSCD2         | WSCD2         | 3.51411394  | 3.046773762 | 0           | 1.885508449 |
| MAPRE2        | MAPRE2        | 8470.185968 | 7719.509122 | 9124.09294  |             |
| 9094.750006   |               |             |             |             |             |
| AGER          | AGER          | 0           | 1.015591254 | 6.249990271 | 0           |

|             |          |             |             |             |             |
|-------------|----------|-------------|-------------|-------------|-------------|
| LGALS12     | LGALS12  | 0           | 0           | 2.678567259 | 0           |
| CFAP61      | CFAP61   | 0           | 3.046773762 | 0           | 0.942754225 |
| GNG13       | GNG13    | 94.88107639 |             | 69.06020528 | 92.85699832 |
| 98.9891936  |          |             |             |             |             |
| ZNF581      | ZNF581   | 730.9356996 |             | 1003.404159 | 879.4629167 |
| 823.9671924 |          |             |             |             |             |
| ZHX1        | ZHX1     | 2315.801087 |             | 2274.924409 | 2163.38949  |
| 2138.166582 |          |             |             |             |             |
| MTCP1       | MTCP1    | 364.2964785 |             | 333.1139313 | 474.1064049 |
| 457.235799  |          |             |             |             |             |
| FBR5        | FBR5     | 832.8450039 |             | 442.7977868 | 542.8562978 |
| 565.6525348 |          |             |             |             |             |
| ZNF284      | ZNF284   | 21.08468364 |             | 30.46773762 | 156.2497568 |
| 74.47758375 |          |             |             |             |             |
| SMAP1       | SMAP1    | 2008.901803 |             | 2287.111504 | 2174.996614 |
| 1798.775061 |          |             |             |             |             |
| NAE1        | NAE1     | 6106.358657 |             | 6372.835119 | 4608.028541 |
| 6250.46051  |          |             |             |             |             |
| USP9X       | USP9X    | 8526.411791 |             | 4039.006417 | 5878.562278 |
| 5712.147848 |          |             |             |             |             |
| ESRP1       | ESRP1    | 0           | 0           | 4.464278765 | 7.542033798 |
| 10-Mar      | 10-Mar   | 0           | 2.031182508 | 87.4998638  | 3.771016899 |
| TSC2        | TSC2     | 5115.378526 |             | 4717.421375 | 4183.922059 |
| 4077.412022 |          |             |             |             |             |
| C16orf46    | C16orf46 |             |             | 87.85284851 | 98.51235164 |
| 107.1426904 |          |             |             |             |             |
| TMEM170B    | TMEM170B |             |             | 126.5081019 | 56.87311023 |
| 157.1426125 |          |             |             |             |             |
| MOB4        | MOB4     | 3797.585798 |             | 3382.934467 | 3191.066461 |
| 3723.879188 |          |             |             |             |             |
| MED7        | MED7     | 1206.512453 |             | 1127.306292 | 1324.997938 |
| 1388.676973 |          |             |             |             |             |
| TMEM55B     | TMEM55B  | 2000.702203 |             | 1998.683588 | 3524.101657 |
| 2960.248266 |          |             |             |             |             |
| CAPN8       | CAPN8    | 2.342742627 |             | 4.062365016 | 0           |
| ZNF707      | ZNF707   | 263.5585455 |             | 377.7999465 | 185.7139966 |
| 206.4631752 |          |             |             |             |             |
| MUTYH       | MUTYH    | 1806.254565 |             | 2046.416377 | 2129.460971 |
| 1892.107729 |          |             |             |             |             |
| C11orf88    | C11orf88 |             |             | 0           | 0           |
| PLXNB1      | PLXNB1   | 14.05645576 |             | 27.42096386 | 57.14276819 |
| 27.33987252 |          |             |             |             |             |
| CLNS1A      | CLNS1A   | 5334.424961 |             | 5507.551371 | 4938.38517  |
| 4982.456078 |          |             |             |             |             |
| CREB3L4     | CREB3L4  | 465.0344114 |             | 398.1117716 | 385.7136853 |
| 456.2930448 |          |             |             |             |             |
| C5          | C5       | 93.70970508 |             | 34.53010264 | 24.10710533 |
| 210.2341921 |          |             |             |             |             |
| GGCT        | GGCT     | 2680.097565 |             | 2747.174342 | 1705.354488 |
| 1940.188194 |          |             |             |             |             |

|             |             |             |   |             |             |   |
|-------------|-------------|-------------|---|-------------|-------------|---|
| TREM1       | TREM1       | 0           | 0 | 0           | 3.771016899 |   |
| MAP4K4      | MAP4K4      | 5603.840364 |   | 6356.585659 | 8799.986302 |   |
| 5022.051755 |             |             |   |             |             |   |
| TRIM2       | TRIM2       | 16.39919839 |   | 60.93547524 | 199.1068329 |   |
| 139.5276253 |             |             |   |             |             |   |
| ZNF529      | ZNF529      | 466.2057828 |   | 255.928996  | 733.0345732 |   |
| 980.4643937 |             |             |   |             |             |   |
| APH1B       | APH1B       | 565.7723444 |   | 442.7977868 | 1151.783921 |   |
| 1375.478414 |             |             |   |             |             |   |
| TNFSF13B    | TNFSF13B    |             |   | 435.7501286 | 561.6219635 |   |
| 5469.634343 | 4041.587361 |             |   |             |             |   |
| NCR3        | NCR3        | 31.62702546 |   | 105.6214904 | 52.67848943 |   |
| 24.51160984 |             |             |   |             |             |   |
| COR07       | COR07       | 12272.45725 |   | 14284.29099 | 5874.097999 |   |
| 6398.472923 |             |             |   |             |             |   |
| FPR1        | FPR1        | 0           | 0 | 20.53568232 | 0           |   |
| ALOXE3      | ALOXE3      | 0           | 0 | 0           | 13.19855915 |   |
| DCAF5       | DCAF5       | 4364.529514 |   | 3577.927988 | 5526.777111 |   |
| 4978.685061 |             |             |   |             |             |   |
| PAFAH1B2    | PAFAH1B2    |             |   | 3220.099741 | 1713.302446 |   |
| 1978.568349 | 2512.440009 |             |   |             |             |   |
| CGA         | CGA         | 14.05645576 |   | 4.062365016 | 20.53568232 | 0 |
| ITGA10      | ITGA10      | 60.9113083  |   | 21.32741634 | 24.99996108 |   |
| 90.50440557 |             |             |   |             |             |   |
| CD3E        | CD3E        | 20018.73575 |   | 16875.06428 | 16557.11708 |   |
| 17595.56485 |             |             |   |             |             |   |
| FGF9        | FGF9        | 8.199599194 |   | 6.093547524 | 156.2497568 |   |
| 176.29504   |             |             |   |             |             |   |
| CTSB        | CTSB        | 19431.87872 |   | 26772.00105 | 18296.40009 |   |
| 21873.78352 |             |             |   |             |             |   |
| GPRASP1     | GPRASP1     | 30.45565415 |   | 2.031182508 | 2042.853963 |   |
| 1445.242226 |             |             |   |             |             |   |
| GYG1        | GYG1        | 3970.948753 |   | 4046.115556 | 2372.317736 |   |
| 2660.452422 |             |             |   |             |             |   |
| RABIF       | RABIF       | 2032.329229 |   | 2599.91361  | 1502.676232 |   |
| 1572.514047 |             |             |   |             |             |   |
| PLIN2       | PLIN2       | 7343.326764 |   | 8357.30043  | 6782.1323   |   |
| 6790.658681 |             |             |   |             |             |   |
| PAM         | PAM         | 2838.232693 |   | 2928.965177 | 2230.353671 |   |
| 3114.859958 |             |             |   |             |             |   |
| UBASH3B     | UBASH3B     | 3824.527338 |   | 4760.076208 | 1863.389957 |   |
| 1262.347907 |             |             |   |             |             |   |
| TRIM5       | TRIM5       | 1218.226166 |   | 703.8047391 | 1416.96208  |   |
| 2263.552894 |             |             |   |             |             |   |
| ANTXR2      | ANTXR2      | 9106.240591 |   | 8023.170907 | 2375.889159 |   |
| 4066.098971 |             |             |   |             |             |   |
| SPAG16      | SPAG16      | 481.4336098 |   | 501.7020795 | 452.6778668 |   |
| 536.4271539 |             |             |   |             |             |   |
| IGFLR1      | IGFLR1      | 3664.049469 |   | 4132.440813 | 2943.745418 |   |
| 4171.687444 |             |             |   |             |             |   |

|             |             |             |             |             |
|-------------|-------------|-------------|-------------|-------------|
| CTNND1      | CTNND1      | 221.3891782 | 332.0983401 | 471.4278376 |
| 187.6080907 |             |             |             |             |
| CPSF3L      | CPSF3L      | 5800.630744 | 7693.103749 | 5067.849254 |
| 5391.611411 |             |             |             |             |
| APITD1-CORT | APITD1-CORT |             | 1081.175722 | 1126.290701 |
| 698.2131989 | 639.1873644 |             |             |             |
| ARMCX6      | ARMCX6      | 555.2300026 | 720.0541991 | 639.2847192 |
| 793.7990572 |             |             |             |             |
| PCNA-AS1    | PCNA-AS1    |             | 7899.728138 | 10945.02694 |
| 6941.060624 | 5775.312381 |             |             |             |
| ATXN3       | ATXN3       | 1308.421757 | 1119.181562 | 1298.212265 |
| 1598.911165 |             |             |             |             |
| ARCN1       | ARCN1       | 16105.18419 | 17819.56414 | 15835.68964 |
| 16030.59284 |             |             |             |             |
| PFKM        | PFKM        | 1200.655596 | 1525.418064 | 1051.784077 |
| 1222.752229 |             |             |             |             |
| CDH23       | CDH23       | 16.39919839 | 19.29623383 | 46.42849916 |
| 26.39711829 |             |             |             |             |
| TAX1BP1     | TAX1BP1     | 7701.766386 | 7053.281259 | 12636.58747 |
| 11598.70523 |             |             |             |             |
| GDF5        | GDF5        | 1.171371313 | 3.046773762 | 0           |
| ITGA2B      | ITGA2B      | 3.51411394  | 5.07795627  | 3.771016899 |
| 15.0840676  |             |             |             | 2.678567259 |
| ZFYVE28     | ZFYVE28     | 581.0001715 | 358.5037127 | 536.6063076 |
| 586.3931278 |             |             |             |             |
| DENND1B     | DENND1B     | 2421.224505 | 2807.094226 | 1164.283902 |
| 1869.481628 |             |             |             |             |
| ACADM       | ACADM       | 5227.830172 | 4849.448238 | 4178.564924 |
| 5282.251921 |             |             |             |             |
| SIPA1L3     | SIPA1L3     | 313.927512  | 187.884382  | 320.5352153 |
| 214.005209  |             |             |             |             |
| OTOA        | OTOA        | 2.342742627 | 0           | 6.249990271 |
| NEDD8-MDP1  | NEDD8-MDP1  |             | 5035.725277 | 0           |
| 5190.170492 | 4955.116205 |             |             | 7003.517288 |
| ZNF573      | ZNF573      | 265.9012882 | 372.7219902 | 963.3913575 |
| 852.2498191 |             |             |             |             |
| CELF3       | CELF3       | 0           | 0           | 0.942754225 |
| INTS7       | INTS7       | 5259.457197 | 6515.017895 | 2529.460348 |
| 3219.505677 |             |             |             |             |
| PCDHA9      | PCDHA9      | 0           | 0           | 1.885508449 |
| LM04        | LM04        | 2167.03693  | 930.2815887 | 646.4275652 |
| 717.435965  |             |             |             |             |
| LMX1B       | LMX1B       | 1.171371313 | 0           | 0           |
| PRMT5       | PRMT5       | 7216.818662 | 10148.8034  | 7675.880909 |
| 7453.414901 |             |             |             |             |
| ZNF324      | ZNF324      | 730.9356996 | 879.502026  | 1657.140278 |
| 1498.036463 |             |             |             |             |
| TBC1D22A    | TBC1D22A    |             | 2152.980474 | 2426.247506 |
| 1839.282851 | 2133.452811 |             |             |             |
| FAS         | FAS         | 8274.566958 | 13122.45459 | 11401.76797 |

|             |         |             |             |             |   |
|-------------|---------|-------------|-------------|-------------|---|
| 8140.68273  |         |             |             |             |   |
| FXYD3       | FXYD3   | 0           | 4.062365016 | 14.28569205 | 0 |
| PLAGL1      | PLAGL1  | 415.8368163 | 499.670897  | 661.606113  |   |
| 624.1032968 |         |             |             |             |   |
| MY01C       | MY01C   | 2341.571256 | 2855.842606 | 1405.354955 |   |
| 1565.914767 |         |             |             |             |   |
| TOMM5       | TOMM5   | 5850.999711 | 6640.95121  | 5524.098544 |   |
| 5684.807975 |         |             |             |             |   |
| BTN3A1      | BTN3A1  | 2198.663955 | 2126.648086 | 9043.735922 |   |
| 7101.767575 |         |             |             |             |   |
| RPAP1       | RPAP1   | 2855.803262 | 3185.909764 | 2808.924199 |   |
| 2638.769075 |         |             |             |             |   |
| ADAM19      | ADAM19  | 10555.22691 | 3624.645186 | 667.8561033 |   |
| 2902.740258 |         |             |             |             |   |
| EHMT2       | EHMT2   | 3.51411394  | 1.015591254 | 1.785711506 |   |
| 0.942754225 |         |             |             |             |   |
| CCDC153     | CCDC153 | 28.11291152 | 14.21827756 | 16.96425931 |   |
| 26.39711829 |         |             |             |             |   |
| THRB        | THRB    | 0           | 5.07795627  | 8.035701777 | 0 |
| ECM1        | ECM1    | 15.22782708 | 18.28064257 | 32.14280711 |   |
| 6.599279573 |         |             |             |             |   |
| CYP3A4      | CYP3A4  | 1.171371313 | 0           | 6.249990271 | 0 |
| AN010       | AN010   | 545.8590321 | 1078.557912 | 505.3563562 |   |
| 484.5756715 |         |             |             |             |   |
| PTGIR       | PTGIR   | 1010.893444 | 3814.56075  | 1074.998327 |   |
| 616.561263  |         |             |             |             |   |
| CTSV        | CTSV    | 137.0504437 | 269.1316823 | 24.10710533 |   |
| 62.22177883 |         |             |             |             |   |
| NDUFB5      | NDUFB5  | 4221.622214 | 4019.710184 | 3175.887914 |   |
| 3244.960041 |         |             |             |             |   |
| PGM3        | PGM3    | 1184.256398 | 1254.255199 | 1412.497801 |   |
| 1399.047269 |         |             |             |             |   |
| PRRG2       | PRRG2   | 21.08468364 | 13.2026863  | 3.571423012 |   |
| 6.599279573 |         |             |             |             |   |
| RPL3        | RPL3    | 30880.86194 | 49317.1113  | 53256.1671  |   |
| 42439.96693 |         |             |             |             |   |
| CYB5R2      | CYB5R2  | 15.22782708 | 87.34084785 | 90.17843106 |   |
| 21.68334717 |         |             |             |             |   |
| CHPT1       | CHPT1   | 2229.11961  | 1207.538001 | 713.3917467 |   |
| 1934.531669 |         |             |             |             |   |
| DET1        | DET1    | 148.7641568 | 231.5548059 | 289.285264  |   |
| 160.2682182 |         |             |             |             |   |
| FAM63A      | FAM63A  | 651.2824503 | 1017.622437 | 644.6418537 |   |
| 715.5504566 |         |             |             |             |   |
| LMBRD1      | LMBRD1  | 2639.099569 | 3055.914083 | 2616.067356 |   |
| 3263.815126 |         |             |             |             |   |
| THBS4       | THBS4   | 43.3407386  | 34.53010264 | 52.67848943 |   |
| 85.79063445 |         |             |             |             |   |
| DNAJC11     | DNAJC11 | 4015.460863 | 4933.742312 | 3166.0665   |   |
| 3865.292321 |         |             |             |             |   |



|                |                |             |             |             |             |
|----------------|----------------|-------------|-------------|-------------|-------------|
| NAA38          | NAA38          | 2318.143829 | 2463.824382 | 1215.17668  |             |
| 1377.363922    |                |             |             |             |             |
| TMEM51         | TMEM51         | 0           | 7.109138778 | 1.785711506 | 0           |
| PHIP           | PHIP           | 4711.255423 | 4416.806364 | 5008.027919 |             |
| 5284.13743     |                |             |             |             |             |
| PEX26          | PEX26          | 476.7481246 | 525.0606783 | 507.1420677 |             |
| 550.5684672    |                |             |             |             |             |
| LAMB3          | LAMB3          | 81.99599194 | 103.5903079 | 0           | 14.14131337 |
| RBF0X2         | RBF0X2         | 35.1411394  | 41.63924142 | 92.85699832 |             |
| 82.01961755    |                |             |             |             |             |
| LRRIQ1         | LRRIQ1         | 1.171371313 | 0           | 0           | 2.828262674 |
| MYL12B         | MYL12B         | 21778.13546 | 28545.22338 | 25591.03159 |             |
| 24950.93331    |                |             |             |             |             |
| SHBG           | SHBG           | 1.171371313 | 5.07795627  | 1.785711506 |             |
| 1.885508449    |                |             |             |             |             |
| TMEM25         | TMEM25         | 391.2380187 | 656.0719501 | 795.5344759 |             |
| 776.8294812    |                |             |             |             |             |
| EIF2B4         | EIF2B4         | 3585.567591 | 5417.163749 | 4483.028736 |             |
| 3944.483676    |                |             |             |             |             |
| SETD5          | SETD5          | 4423.09808  | 2809.125409 | 3584.815848 |             |
| 4150.946851    |                |             |             |             |             |
| PLEKHG6        | PLEKHG6        | 11.71371313 | 3.046773762 | 8.92855753  |             |
| 11.3130507     |                |             |             |             |             |
| PHB2           | PHB2           | 11065.9448  | 15030.75056 | 9267.842716 |             |
| 8990.104287    |                |             |             |             |             |
| ZNF234         | ZNF234         | 610.2844543 | 421.4703704 | 711.6060352 |             |
| 1017.231808    |                |             |             |             |             |
| FNBP1L         | FNBP1L         | 94.88107639 | 93.43439537 | 126.7855169 |             |
| 89.56165135    |                |             |             |             |             |
| TMEM110-MUSTN1 | TMEM110-MUSTN1 | 1111.605413 | 1740.657772 | 1992.59004  |             |
| 1416.016846    |                |             |             |             |             |
| NCOA7          | NCOA7          | 2247.861551 | 1776.269103 | 3924.99389  |             |
| 4210.340368    |                |             |             |             |             |
| RGMA           | RGMA           | 0           | 0           | 1.785711506 | 0           |
| RGS6           | RGS6           | 92.53833376 | 103.5903079 | 15.1785478  |             |
| 59.39351616    |                |             |             |             |             |
| ZNF444         | ZNF444         | 1371.675808 | 1440.108398 | 1039.284097 |             |
| 971.0368515    |                |             |             |             |             |
| MBNL1          | MBNL1          | 20912.49206 | 17383.8755  | 18706.22088 |             |
| 22091.55975    |                |             |             |             |             |
| MSI2           | MSI2           | 127.6794732 | 103.5903079 | 45.5356434  |             |
| 121.615295     |                |             |             |             |             |
| LINC01398      | LINC01398      |             | 1.171371313 | 0           | 0           |
| PLAC1          | PLAC1          | 1.171371313 | 0           | 0           | 11.3130507  |
| FAM3A          | FAM3A          | 1064.776524 | 1113.088014 | 1538.390462 |             |
| 1253.863119    |                |             |             |             |             |
| FGF12          | FGF12          | 0           | 0           | 1.785711506 | 0           |
| C15orf41       | C15orf41       |             |             | 602.0848551 | 596.1520661 |
| 481.2492509    |                |             |             |             |             |
| HIPK4          | HIPK4          | 1.171371313 | 0           | 2.678567259 | 0           |

|                 |              |             |               |
|-----------------|--------------|-------------|---------------|
| TMEM185A        | TMEM185A     | 797.7038645 | 901.8450336   |
| 574.999105      | 675.9547791  |             |               |
| ZNF18 ZNF18     | 858.6151728  | 853.0966534 | 1072.319759   |
| 860.7346072     |              |             |               |
| DTD1 DTD1       | 1916.363469  | 2492.260937 | 1701.783065   |
| 1936.417178     |              |             |               |
| CCDC121 CCDC121 | 67.93953618  | 31.48332888 | 325.8923499   |
| 203.6349125     |              |             |               |
| FAM155B FAM155B | 11.71371313  | 5.07795627  | 0 0           |
| ZNF542P ZNF542P | 524.7743484  | 574.8246498 | 793.7487644   |
| 522.2858405     |              |             |               |
| GTF2H2B GTF2H2B | 49.19759517  | 233.5859884 | 176.7854391   |
| 74.47758375     |              |             |               |
| CCT6P3 CCT6P3   | 90.19559114  | 83.27848283 | 299.1066773   |
| 155.5544471     |              |             |               |
| LINC01085       | LINC01085    | 0 0         | 0 3.771016899 |
| TP73-AS1        | TP73-AS1     | 1021.435785 | 727.1633379   |
| 1224.105237     | 1500.864726  |             |               |
| LOC100996291    | LOC100996291 | 10.54234182 | 0 0           |
| 1.885508449     |              |             |               |
| ATP5J2 ATP5J2   | 7176.992038  | 7132.497377 | 3697.315673   |
| 4001.991684     |              |             |               |
| OSBPL8 OSBPL8   | 6539.766043  | 6408.380813 | 5304.456029   |
| 5694.235517     |              |             |               |
| SNHG18 SNHG18   | 0 0          | 1.785711506 | 9.427542247   |
| UBE2V1 UBE2V1   | 12005.38459  | 13253.46587 | 7360.702828   |
| 10601.27126     |              |             |               |
| SLC25A12        | SLC25A12     | 3084.220668 | 2904.590987   |
| 1342.855053     | 2134.395565  |             |               |
| CARD14 CARD14   | 83.16736326  | 32.49892013 | 66.07132572   |
| 151.7834302     |              |             |               |
| PIGT PIGT       | 5597.983507  | 8209.024106 | 5819.633798   |
| 5829.049371     |              |             |               |
| GMDS-AS1        | GMDS-AS1     | 94.88107639 | 143.1983668   |
| 156.2497568     | 134.8138541  |             |               |
| LARS2-AS1       | LARS2-AS1    | 12.88508445 | 0 8.035701777 |
|                 | 10.37029647  |             |               |
| CHMP1A CHMP1A   | 7637.340964  | 8074.966061 | 4838.385326   |
| 4592.155829     |              |             |               |
| PPP1R13L        | PPP1R13L     | 40.99799597 | 14.21827756   |
| 25.89281684     | 41.48118589  |             |               |
| AP2B1 AP2B1     | 15013.46612  | 12624.81488 | 6925.882076   |
| 10244.91016     |              |             |               |
| COX7A1 COX7A1   | 3.51411394   | 0 0         | 2.828262674   |
| CABIN1 CABIN1   | 1634.062982  | 1204.491227 | 910.7128681   |
| 952.181767      |              |             |               |
| PPP2R2A PPP2R2A | 2020.615516  | 1193.319724 | 1128.569672   |
| 1380.192185     |              |             |               |
| DGKZ DGKZ       | 5487.874604  | 3384.96565  | 2849.995564   |
| 2893.312716     |              |             |               |

|             |         |             |             |             |
|-------------|---------|-------------|-------------|-------------|
| ZSCAN31     | ZSCAN31 | 53.88308042 | 62.96665775 | 209.821102  |
| 85.79063445 |         |             |             |             |
| SLC7A7      | SLC7A7  | 16.39919839 | 19.29623383 | 54.46420093 |
| 23.56885562 |         |             |             |             |
| DMKN        | DMKN    | 0           | 0           | 39.28565313 |
| 1.885508449 |         |             |             |             |
| TPRA1       | TPRA1   | 1921.048954 | 2886.310344 | 3494.637417 |
| 2139.109336 |         |             |             |             |
| PLEKHB1     | PLEKHB1 | 208.5040938 | 276.2408211 | 2241.960796 |
| 1411.303074 |         |             |             |             |
| CLDN20      | CLDN20  | 0           | 0           | 0.892855753 |
| 0.942754225 |         |             |             |             |
| TNNT3       | TNNT3   | 4.685485254 | 0           | 11.60712479 |
| 12.25580492 |         |             |             |             |
| TCTN3       | TCTN3   | 4953.729285 | 6764.853343 | 4774.992567 |
| 5006.967687 |         |             |             |             |
| CDYL        | CDYL    | 1133.887431 | 869.3461135 | 893.7486088 |
| 802.2838452 |         |             |             |             |
| ABCC3       | ABCC3   | 3.51411394  | 0           | 0           |
| 2.828262674 |         |             |             |             |
| ZMYND8      | ZMYND8  | 1799.226337 | 1921.498653 | 1652.675999 |
| 1859.111331 |         |             |             |             |
| PHF23       | PHF23   | 2461.05113  | 2448.590514 | 2270.53218  |
| 2167.391963 |         |             |             |             |
| SEC13       | SEC13   | 9743.466585 | 13461.66207 | 7976.773298 |
| 7659.878076 |         |             |             |             |
| TAF1        | TAF1    | 1103.431777 | 991.217064  | 1066.962625 |
| 1630.964809 |         |             |             |             |
| GLIPR2      | GLIPR2  | 1965.561064 | 2471.949112 | 2096.425308 |
| 1623.422775 |         |             |             |             |
| ZNF512      | ZNF512  | 2471.593471 | 2514.603945 | 2819.638468 |
| 3132.772289 |         |             |             |             |
| PCSK6       | PCSK6   | 33.96976809 | 433.6574655 | 25.89281684 |
| 12.25580492 |         |             |             |             |
| MMAB        | MMAB    | 633.7118806 | 821.6133245 | 1100.891143 |
| 955.0100296 |         |             |             |             |
| MFAP3       | MFAP3   | 1520.439965 | 1126.290701 | 1195.533853 |
| 1570.628538 |         |             |             |             |
| CLDN18      | CLDN18  | 0           | 0           | 0.892855753 |
| 0           |         |             |             |             |
| COASY       | COASY   | 5966.965471 | 7682.947837 | 5489.27717  |
| 4785.420445 |         |             |             |             |
| C2orf88     | C2orf88 | 5.856856567 | 7.109138778 | 82.14272928 |
| 2.828262674 |         |             |             |             |
| TUBB        | TUBB    | 3593.76719  | 2909.668943 | 1516.961924 |
| 3334.521693 |         |             |             |             |
| SEMA5B      | SEMA5B  | 0           | 4.062365016 | 0           |
| 13.19855915 |         |             |             |             |
| INTS9       | INTS9   | 2637.928198 | 3228.564597 | 2235.710806 |
| 2610.486448 |         |             |             |             |
| MAVS        | MAVS    | 6064.18929  | 5055.613263 | 3995.529495 |
| 4196.199054 |         |             |             |             |
| STON2       | STON2   | 66.76816487 | 14.21827756 | 3.571423012 |
| 128.2145746 |         |             |             |             |
| SLC11A2     | SLC11A2 | 2364.998682 | 2204.848613 | 2914.281178 |
| 2868.801106 |         |             |             |             |

|          |          |             |             |             |             |
|----------|----------|-------------|-------------|-------------|-------------|
| CELF4    | CELF4    | 1.171371313 | 0           | 1.785711506 | 1.885508449 |
| HIPK1    | HIPK1    | 2434.109589 | 878.4864348 | 1580.354683 |             |
|          |          | 1749.751841 |             |             |             |
| ZNF594   | ZNF594   | 282.3004865 | 230.5392147 | 483.0349624 |             |
|          |          | 517.5720694 |             |             |             |
| VPS13A   | VPS13A   | 1470.070998 | 590.0585186 | 695.5346316 |             |
|          |          | 902.2157931 |             |             |             |
| HERPUD1  | HERPUD1  | 10767.24511 | 12747.70142 | 13542.83606 |             |
|          |          | 12245.43462 |             |             |             |
| ATF3     | ATF3     | 178.0484396 | 92.41880412 | 1041.069808 |             |
|          |          | 259.2574118 |             |             |             |
| GPX4     | GPX4     | 9199.950296 | 11836.71607 | 9859.806081 |             |
|          |          | 7655.164305 |             |             |             |
| NHSL2    | NHSL2    | 146.4214142 | 34.53010264 | 48.21421066 |             |
|          |          | 118.7870323 |             |             |             |
| MANEAL   | MANEAL   | 192.1048954 | 189.9155645 | 168.7497373 |             |
|          |          | 148.9551675 |             |             |             |
| TBCA     | TBCA     | 2797.234697 | 2945.214637 | 2158.032355 |             |
|          |          | 2447.389967 |             |             |             |
| CACNB4   | CACNB4   | 3.51411394  | 1.015591254 | 0           | 0.942754225 |
| ELP6     | ELP6     | 2086.212309 | 2890.372709 | 1467.854858 |             |
|          |          | 1511.235022 |             |             |             |
| DCAKD    | DCAKD    | 1368.161694 | 1236.990147 | 873.2129265 |             |
|          |          | 1480.124133 |             |             |             |
| EN01     | EN01     | 167428.7873 | 287540.2894 | 120579.2766 |             |
|          |          | 138285.0752 |             |             |             |
| ZBTB17   | ZBTB17   | 2711.724591 | 2874.123249 | 3549.994474 |             |
|          |          | 3046.0389   |             |             |             |
| ARHGAP27 | ARHGAP27 |             | 104.2520469 | 199.0558858 |             |
|          |          | 13.3928363  | 33.93915209 |             |             |
| RNF130   | RNF130   | 166.3347265 | 275.2252298 | 1237.498074 |             |
|          |          | 919.1853691 |             |             |             |
| GNL3L    | GNL3L    | 2640.270941 | 2051.494333 | 2151.782365 |             |
|          |          | 2071.231032 |             |             |             |
| ADAMTS12 | ADAMTS12 |             | 0           | 0           | 8.035701777 |
|          |          | 0.942754225 |             |             |             |
| SLC35A2  | SLC35A2  | 1651.633552 | 1860.563177 | 1658.033133 |             |
|          |          | 1665.846715 |             |             |             |
| KIF13A   | KIF13A   | 0           | 2.031182508 | 7.142846024 | 9.427542247 |
| SLFN11   | SLFN11   | 4064.658458 | 3879.55859  | 2173.210903 |             |
|          |          | 2638.769075 |             |             |             |
| SMARCA2  | SMARCA2  | 9233.920064 | 7426.00325  | 7816.952118 |             |
|          |          | 9523.703178 |             |             |             |
| NYNRIN   | NYNRIN   | 1.171371313 | 0           | 0           | 0           |
| ZC3H12A  | ZC3H12A  | 2550.075349 | 2922.871629 | 3510.708821 |             |
|          |          | 3593.779105 |             |             |             |
| ROPN1B   | ROPN1B   | 0           | 2.031182508 | 0           | 5.656525348 |
| KRBA2    | KRBA2    | 120.6512453 | 92.41880412 | 189.2854196 |             |
|          |          | 215.8907175 |             |             |             |
| C4B      | C4B      | 0           | 0           | 0           | 1.885508449 |

|             |             |             |             |             |             |   |
|-------------|-------------|-------------|-------------|-------------|-------------|---|
| CSAG1       | CSAG1       | 1.171371313 | 16.24946006 | 0           | 0           |   |
| FAM72B      | FAM72B      | 1054.234182 | 1206.52241  | 327.6780614 |             |   |
| 745.7185917 |             |             |             |             |             |   |
| SOGA3       | SOGA3       | 465.0344114 | 596.1520661 | 517.8563368 |             |   |
| 408.2125793 |             |             |             |             |             |   |
| BIRC5       | BIRC5       | 12813.6308  | 17563.63515 | 4943.742305 |             |   |
| 7028.232745 |             |             |             |             |             |   |
| PEG10       | PEG10       | 0           | 5.07795627  | 0.892855753 | 6.599279573 |   |
| H2AFY       | H2AFY       | 16014.9886  | 18962.1043  | 7449.988403 |             |   |
| 9010.84488  |             |             |             |             |             |   |
| C2CD4B      | C2CD4B      | 29.28428284 | 10.15591254 | 6.249990271 |             |   |
| 38.65292321 |             |             |             |             |             |   |
| SMPD1       | SMPD1       | 720.3933578 | 344.2854351 | 452.6778668 |             |   |
| 328.0784702 |             |             |             |             |             |   |
| TFG         | TFG         | 4639.801773 | 5021.08316  | 5232.134713 |             |   |
| 5153.094592 |             |             |             |             |             |   |
| TYMS0S      | TYMS0S      | 2798.406068 | 3296.609211 | 1217.855247 |             |   |
| 1596.082902 |             |             |             |             |             |   |
| C9orf106    | C9orf106    |             | 1.171371313 | 6.093547524 |             |   |
| 8.92855753  | 4.713771124 |             |             |             |             |   |
| ICAM4       | ICAM4       | 32.79839678 | 69.06020528 | 9.821413283 |             | 0 |
| HARS        | HARS        | 8452.615398 | 11970.77411 | 6998.203392 |             |   |
| 7009.377661 |             |             |             |             |             |   |
| SPDYE3      | SPDYE3      | 323.2984825 | 376.7843553 | 324.1066384 |             |   |
| 401.6132997 |             |             |             |             |             |   |
| MRPS18C     | MRPS18C     | 4533.206983 | 4014.632227 | 3566.958733 |             |   |
| 3725.764696 |             |             |             |             |             |   |
| WNK1        | WNK1        | 4885.789748 | 1974.309398 | 2214.282268 |             |   |
| 2856.545301 |             |             |             |             |             |   |
| GLYCTK      | GLYCTK      | 780.1332948 | 750.5219367 | 424.1064827 |             |   |
| 490.2321969 |             |             |             |             |             |   |
| DNAJC19     | DNAJC19     | 2324.000686 | 2376.483534 | 2730.352893 |             |   |
| 2728.330726 |             |             |             |             |             |   |
| GDF11       | GDF11       | 231.9315201 | 194.9935208 | 363.3922915 |             |   |
| 373.330673  |             |             |             |             |             |   |
| IRF3        | IRF3        | 3074.849698 | 3406.293066 | 4218.743433 |             |   |
| 3598.492876 |             |             |             |             |             |   |
| IRAK1       | IRAK1       | 9619.301226 | 10283.87704 | 7174.095976 |             |   |
| 8669.56785  |             |             |             |             |             |   |
| GPR18       | GPR18       | 721.5647291 | 338.1918876 | 1349.105043 |             |   |
| 1415.074091 |             |             |             |             |             |   |
| NBPF9       | NBPF9       | 734.4498135 | 534.2009996 | 845.5343981 |             |   |
| 829.6237177 |             |             |             |             |             |   |
| ZKSCAN8     | ZKSCAN8     | 618.4840535 | 222.4144846 | 664.2846803 |             |   |
| 935.2121909 |             |             |             |             |             |   |
| IDS         | IDS         | 11343.5598  | 13407.83574 | 17960.68633 |             |   |
| 13626.56956 |             |             |             |             |             |   |
| TBX5        | TBX5        | 0           | 2.031182508 | 0.892855753 | 0           |   |
| ABCD3       | ABCD3       | 3647.65027  | 2864.982928 | 2987.49535  |             |   |
| 3127.115763 |             |             |             |             |             |   |

|             |             |             |             |             |   |
|-------------|-------------|-------------|-------------|-------------|---|
| PEX19       | PEX19       | 5421.106439 | 6217.449657 | 4333.028969 |   |
| 4884.409638 |             |             |             |             |   |
| RSPH4A      | RSPH4A      | 2.342742627 | 5.07795627  | 1.785711506 | 0 |
| JUND        | JUND        | 5425.791924 | 7791.616101 | 5687.491147 |   |
| 5894.099413 |             |             |             |             |   |
| CCDC65      | CCDC65      | 107.7661608 | 71.09138778 | 121.4283824 |   |
| 110.3022443 |             |             |             |             |   |
| 1-Mar       | 1-Mar       | 10.54234182 | 5.07795627  | 22.32139383 |   |
| 3.771016899 |             |             |             |             |   |
| SHMT2       | SHMT2       | 10207.32963 | 15549.71769 | 8360.701271 |   |
| 9617.978601 |             |             |             |             |   |
| ZCCHC6      | ZCCHC6      | 5398.850384 | 4188.298332 | 4949.992295 |   |
| 6287.227925 |             |             |             |             |   |
| CNTLN       | CNTLN       | 217.8750643 | 31.48332888 | 2.678567259 |   |
| 46.19495701 |             |             |             |             |   |
| POP1        | POP1        | 1158.486229 | 1523.386881 | 727.6774387 |   |
| 878.6469374 |             |             |             |             |   |
| CFAP97      | CFAP97      | 2110.811107 | 1674.709978 | 2450.889042 |   |
| 3931.285117 |             |             |             |             |   |
| HMCES       | HMCES       | 5720.977495 | 9091.572906 | 6849.989337 |   |
| 6687.89847  |             |             |             |             |   |
| RAI14       | RAI14       | 7.028227881 | 54.84192772 | 83.92844078 |   |
| 85.79063445 |             |             |             |             |   |
| NCKIPSD     | NCKIPSD     | 1959.704207 | 2354.140527 | 1589.28324  |   |
| 1572.514047 |             |             |             |             |   |
| TRIM55      | TRIM55      | 0           | 66.07132572 | 0           |   |
| DEPDC1      | DEPDC1      | 3196.672314 | 2422.185141 | 529.4634615 |   |
| 1210.496425 |             |             |             |             |   |
| KIR2DL4     | KIR2DL4     | 0           | 0           | 4.713771124 |   |
| C11orf73    | C11orf73    |             | 3368.863898 | 3457.072629 |   |
| 2426.781937 | 2513.382763 |             |             |             |   |
| AMZ2        | AMZ2        | 6675.645115 | 9192.11644  | 6600.882582 |   |
| 5840.362422 |             |             |             |             |   |
| SHPK        | SHPK        | 1566.123446 | 2003.761544 | 759.8202458 |   |
| 858.8490987 |             |             |             |             |   |
| PCSK1N      | PCSK1N      | 7.028227881 | 22.34300759 | 187.4997081 |   |
| 48.08046546 |             |             |             |             |   |
| USF2        | USF2        | 407.6372171 | 443.813378  | 347.3208879 |   |
| 466.6633412 |             |             |             |             |   |
| UQCRC1      | UQCRC1      | 16230.52092 | 26343.42154 | 11763.37455 |   |
| 11753.31692 |             |             |             |             |   |
| SLC13A3     | SLC13A3     | 62.08267961 | 77.18493531 | 55.35705669 |   |
| 85.79063445 |             |             |             |             |   |
| BFSP1       | BFSP1       | 122.9939879 | 36.56128515 | 25.89281684 |   |
| 12.25580492 |             |             |             |             |   |
| PLCE1       | PLCE1       | 43.3407386  | 6.093547524 | 3.571423012 |   |
| 25.45436407 |             |             |             |             |   |
| NRG3        | NRG3        | 0           | 0           | 2.828262674 |   |
| GPS1        | GPS1        | 7934.869277 | 11349.23226 | 5776.776722 |   |
| 6268.37284  |             |             |             |             |   |

|             |          |             |             |             |
|-------------|----------|-------------|-------------|-------------|
| SEC22C      | SEC22C   | 2924.91417  | 2849.749059 | 3095.530896 |
| 3158.226653 |          |             |             |             |
| XKR6        | XKR6     | 51.54033779 | 48.74838019 | 38.39279738 |
| 61.27902461 |          |             |             |             |
| FAM115C     | FAM115C  | 3494.200628 | 2700.457145 | 2713.388633 |
| 3094.119366 |          |             |             |             |
| SLC01A2     | SLC01A2  | 3.51411394  | 0           | 2.828262674 |
| IZUM04      | IZUM04   | 111.2802748 | 50.7795627  | 37.49994163 |
| 55.62249926 |          |             |             |             |
| MDH1B       | MDH1B    | 16.39919839 | 21.32741634 | 60.71419121 |
| 28.28262674 |          |             |             |             |
| EXOSC2      | EXOSC2   | 3446.174404 | 4068.458564 | 2585.710261 |
| 3112.97445  |          |             |             |             |
| MYH11       | MYH11    | 1484.127454 | 1812.830388 | 1560.711856 |
| 1449.013243 |          |             |             |             |
| ETV1        | ETV1     | 24.59879758 | 12.18709505 | 26.78567259 |
| 11.3130507  |          |             |             |             |
| DHCR7       | DHCR7    | 1812.111422 | 2912.715717 | 1653.568855 |
| 2022.207812 |          |             |             |             |
| MKS1        | MKS1     | 1372.847179 | 1853.454039 | 1705.354488 |
| 1438.642947 |          |             |             |             |
| EMX2        | EMX2     | 0           | 0           | 0.942754225 |
| ZGPAT       | ZGPAT    | 4567.176751 | 5867.070675 | 4436.600237 |
| 4690.202268 |          |             |             |             |
| FES         | FES      | 588.0283994 | 699.742374  | 120.5355267 |
| 245.1160984 |          |             |             |             |
| A2M         | A2M      | 4.685485254 | 0           | 116.0712479 |
| MCM8-AS1    | MCM8-AS1 | 7.142846024 | 22.25605496 | 703.2946516 |
| 7.542033798 |          |             |             |             |
| MATR3       | MATR3    | 25022.834   | 26399.27906 | 28163.34902 |
| 27619.87052 |          |             |             |             |
| RBM10       | RBM10    | 5532.386713 | 4657.501491 | 4108.922175 |
| 4527.105787 |          |             |             |             |
| FAH         | FAH      | 2374.369652 | 3706.908077 | 1584.818962 |
| 2487.928399 |          |             |             |             |
| KRT18       | KRT18    | 66.76816487 | 80.23170907 | 591.9633643 |
| 440.2662229 |          |             |             |             |
| FOXP1       | FOXP1    | 7335.127165 | 7061.405989 | 12426.76637 |
| 11523.28489 |          |             |             |             |
| MED24       | MED24    | 7673.653474 | 10014.74536 | 5645.526926 |
| 5780.026152 |          |             |             |             |
| TREM2       | TREM2    | 0           | 0           | 1.885508449 |
| SNX15       | SNX15    | 1684.431949 | 1119.181562 | 806.248745  |
| 838.1085058 |          |             |             |             |
| NCOA1       | NCOA1    | 5457.418949 | 4709.296645 | 7637.488111 |
| 7202.642277 |          |             |             |             |
| AMZ1        | AMZ1     | 36.31251072 | 40.62365016 | 3.571423012 |
| 22.62610139 |          |             |             |             |
| CMC4        | CMC4     | 408.8085884 | 464.1252031 | 575.8919607 |
| 557.1677468 |          |             |             |             |

|             |           |             |             |             |             |
|-------------|-----------|-------------|-------------|-------------|-------------|
| MIR6861     | MIR6861   | 14.05645576 | 12.18709505 | 24.99996108 |             |
| 21.68334717 |           |             |             |             |             |
| MIR6502     | MIR6502   | 1.171371313 | 1.015591254 | 0           | 0           |
| CDC14B      | CDC14B    | 719.2219865 | 172.6505132 | 385.7136853 |             |
| 466.6633412 |           |             |             |             |             |
| PPAPDC1B    | PPAPDC1B  |             | 1198.312854 | 1234.958965 |             |
| 2279.460737 |           | 1955.272262 |             |             |             |
| MYOZ3       | MYOZ3     | 0           | 0           | 9.821413283 | 0           |
| SARDH       | SARDH     | 124.1653592 | 259.991361  | 463.3921358 |             |
| 591.1068989 |           |             |             |             |             |
| UFD1L       | UFD1L     | 6095.816315 | 8364.409568 | 4897.313805 |             |
| 4723.198666 |           |             |             |             |             |
| RNF214      | RNF214    | 707.5082733 | 641.8536726 | 632.1418731 |             |
| 599.5916869 |           |             |             |             |             |
| NPW         | NPW       | 58.56856567 | 75.1537528  | 41.07136464 |             |
| 18.85508449 |           |             |             |             |             |
| EPHA10      | EPHA10    | 12.88508445 | 0           | 0.892855753 | 7.542033798 |
| CA10        | CA10      | 16.39919839 | 0           | 0           | 0           |
| ACD         | ACD       | 3546.912337 | 4600.628381 | 4533.921514 |             |
| 3551.355165 |           |             |             |             |             |
| CBS         | CBS       | 441.6069852 | 235.6171709 | 169.6425931 |             |
| 300.7385977 |           |             |             |             |             |
| CLINT1      | CLINT1    | 10017.56747 | 11921.01014 | 7056.239016 |             |
| 7701.359262 |           |             |             |             |             |
| SPTA1       | SPTA1     | 5.856856567 | 5.07795627  | 0           | 0.942754225 |
| ARHGEF4     | ARHGEF4   | 11.71371313 | 5.07795627  | 73.21417175 |             |
| 17.91233027 |           |             |             |             |             |
| UNC79       | UNC79     | 8.199599194 | 6.093547524 | 13.3928363  |             |
| 5.656525348 |           |             |             |             |             |
| FNIP1       | FNIP1     | 1126.859204 | 731.2257029 | 1349.105043 |             |
| 1294.401551 |           |             |             |             |             |
| DACT1       | DACT1     | 48.02622385 | 93.43439537 | 1434.819195 |             |
| 633.530839  |           |             |             |             |             |
| SLC34A3     | SLC34A3   | 0           | 0           | 0.942754225 |             |
| ITPRIP      | ITPRIP    | 2724.609675 | 2900.528622 | 3966.065255 |             |
| 3703.138595 |           |             |             |             |             |
| LOC389831   | LOC389831 |             | 1604.778699 | 53.82633646 |             |
| 12.49998054 |           | 690.0960925 |             |             |             |
| PASK        | PASK      | 5224.316058 | 6475.409836 | 4273.207634 |             |
| 3851.151008 |           |             |             |             |             |
| PRPS2       | PRPS2     | 5036.896648 | 4533.599358 | 4083.922214 |             |
| 5181.377219 |           |             |             |             |             |
| NSG1        | NSG1      | 70.28227881 | 90.38762161 | 527.67775   |             |
| 435.5524518 |           |             |             |             |             |
| ARHGEF28    | ARHGEF28  |             | 1.171371313 | 3.046773762 | 0           |
| 0           |           |             |             |             |             |
| SLC7A9      | SLC7A9    | 5.856856567 | 0           | 5.357134518 | 10.37029647 |
| GRID2IP     | GRID2IP   | 0           | 5.07795627  | 21.42853807 | 5.656525348 |
| FAM47E      | FAM47E    | 3.51411394  | 5.07795627  | 27.67852834 |             |
| 7.542033798 |           |             |             |             |             |



|             |            |             |             |             |
|-------------|------------|-------------|-------------|-------------|
| BCL6        | BCL6       | 281.1291152 | 94.44998663 | 1608.033211 |
| 1424.501634 |            |             |             |             |
| GPC3        | GPC3       | 8.199599194 | 0           | 22.32139383 |
| GTF3C5      | GTF3C5     | 5149.348294 | 6440.879733 | 3985.708082 |
| 4161.317148 |            |             |             |             |
| KIF17       | KIF17      | 0           | 0           | 0.942754225 |
| FAM124B     | FAM124B    | 107.7661608 | 283.3499599 | 1.785711506 |
| 30.16813519 |            |             |             |             |
| ICAM2       | ICAM2      | 4484.009388 | 7307.179073 | 8045.523191 |
| 5928.981319 |            |             |             |             |
| TOR2A       | TOR2A      | 1506.383509 | 1926.576609 | 1406.247811 |
| 1283.0885   |            |             |             |             |
| ZBTB37      | ZBTB37     | 140.5645576 | 105.6214904 | 197.3211214 |
| 129.1573288 |            |             |             |             |
| NSUN5       | NSUN5      | 3050.2509   | 4562.035913 | 3343.744795 |
| 3128.058518 |            |             |             |             |
| APEX2       | APEX2      | 3857.325735 | 5168.343892 | 3322.316257 |
| 3646.573341 |            |             |             |             |
| PLEKHM1     | PLEKHM1    | 525.9457197 | 504.7488533 | 566.0705474 |
| 369.5596561 |            |             |             |             |
| CRHR1       | CRHR1      | 77.31050669 | 85.30966534 | 148.214055  |
| 102.7602105 |            |             |             |             |
| ZNF347      | ZNF347     | 147.5927855 | 127.964498  | 624.9990271 |
| 524.1713489 |            |             |             |             |
| SNORD15A    | SNORD15A   |             | 3.51411394  | 2.031182508 |
| 5.357134518 | 15.0840676 |             |             |             |
| KLHL1       | KLHL1      | 0           | 0           | 0.942754225 |
| PTPRD       | PTPRD      | 8.199599194 | 0           | 1.785711506 |
| CSMD3       | CSMD3      | 0           | 0.892855753 | 0           |
| TTC39C      | TTC39C     | 1917.53484  | 1374.094967 | 2686.602961 |
| 3650.344358 |            |             |             |             |
| SLC29A1     | SLC29A1    | 3548.083708 | 5959.489479 | 2846.424141 |
| 3265.700634 |            |             |             |             |
| G0S2        | G0S2       | 289.3287144 | 315.84888   | 406.2493676 |
| 234.745802  |            |             |             |             |
| OXR1        | OXR1       | 1448.986315 | 1435.030442 | 2369.639169 |
| 1860.99684  |            |             |             |             |
| CALU        | CALU       | 5307.483421 | 7006.564062 | 4882.135258 |
| 4877.810359 |            |             |             |             |
| CYP2C8      | CYP2C8     | 0           | 0           | 2.828262674 |
| MYCL        | MYCL       | 7.028227881 | 0           | 0           |
| RRAS2       | RRAS2      | 2197.492584 | 3103.646872 | 1576.78326  |
| 1274.603712 |            |             |             |             |
| CNPPD1      | CNPPD1     | 5514.816144 | 7125.388238 | 6812.489396 |
| 5709.319585 |            |             |             |             |
| POLR3GL     | POLR3GL    | 2286.516804 | 1972.278215 | 2677.674403 |
| 1859.111331 |            |             |             |             |
| AK9         | AK9        | 364.2964785 | 187.884382  | 572.3205377 |
| 583.5648651 |            |             |             |             |
| IL20RB      | IL20RB     | 16.39919839 | 20.31182508 | 79.46416202 |

|             |          |             |             |             |             |
|-------------|----------|-------------|-------------|-------------|-------------|
| 38.65292321 |          |             |             |             |             |
| BIN1        | BIN1     | 3332.551387 | 6596.265195 | 3069.638079 |             |
| 2858.430809 |          |             |             |             |             |
| LDB2        | LDB2     | 0           | 0           | 0           | 11.3130507  |
| PICALM      | PICALM   | 4325.874261 | 2096.180348 | 1096.426865 |             |
| 1427.329896 |          |             |             |             |             |
| CITED1      | CITED1   | 2.342742627 | 1.015591254 | 5.357134518 |             |
| 0.942754225 |          |             |             |             |             |
| CAB39L      | CAB39L   | 685.2522184 | 821.6133245 | 808.0344565 |             |
| 721.2069819 |          |             |             |             |             |
| NKX2-1      | NKX2-1   | 0           | 0           | 0.892855753 | 0           |
| ZNF300      | ZNF300   | 22.25605496 | 34.53010264 | 183.0354294 |             |
| 127.2718203 |          |             |             |             |             |
| ANKRD40     | ANKRD40  | 1365.818951 | 601.2300224 | 749.9988325 |             |
| 911.6433353 |          |             |             |             |             |
| SLC39A8     | SLC39A8  | 5764.318234 | 8257.772487 | 5732.133934 |             |
| 5873.35882  |          |             |             |             |             |
| MOAP1       | MOAP1    | 2121.353449 | 2288.127095 | 3141.959395 |             |
| 2963.076528 |          |             |             |             |             |
| CASP8       | CASP8    | 6538.594672 | 4578.285373 | 8008.023249 |             |
| 6088.306783 |          |             |             |             |             |
| TBC1D3H     | TBC1D3H  | 69.11090749 | 30.46773762 | 64.28561422 |             |
| 82.01961755 |          |             |             |             |             |
| SMARCA4     | SMARCA4  | 7303.500139 | 6743.525927 | 4357.136075 |             |
| 4900.43646  |          |             |             |             |             |
| VWA9        | VWA9     | 4646.83     | 5387.711603 | 3688.387116 | 4312.157824 |
| BZW1        | BZW1     | 20705.15934 | 22545.11025 | 20099.96871 |             |
| 23129.53215 |          |             |             |             |             |
| LCA5        | LCA5     | 3.51411394  | 10.15591254 | 44.64278765 |             |
| 45.25220279 |          |             |             |             |             |
| KANK4       | KANK4    | 0           | 0           | 0.892855753 | 1.885508449 |
| MRPL32      | MRPL32   | 3050.2509   | 3735.344632 | 3298.209152 |             |
| 3598.492876 |          |             |             |             |             |
| CASP12      | CASP12   | 0           | 2.031182508 | 17.85711506 | 2.828262674 |
| DLX2        | DLX2     | 2.342742627 | 3.046773762 | 0           | 0           |
| RAPGEF3     | RAPGEF3  | 29.28428284 | 41.63924142 | 139.2854975 |             |
| 125.3863119 |          |             |             |             |             |
| TP53INP1    | TP53INP1 |             | 2502.049126 | 1311.128309 |             |
| 4221.422    |          | 3264.75788  |             |             |             |
| PFKFB1      | PFKFB1   | 26.94154021 | 43.67042392 | 37.49994163 |             |
| 14.14131337 |          |             |             |             |             |
| SSBP2       | SSBP2    | 2409.510792 | 2209.926569 | 2231.246527 |             |
| 1705.442393 |          |             |             |             |             |
| TRIB3       | TRIB3    | 1665.690008 | 3059.976448 | 3627.672925 |             |
| 1894.935992 |          |             |             |             |             |
| LPP         | LPP      | 725.078843  | 597.1676574 | 515.1777695 |             |
| 637.3018559 |          |             |             |             |             |
| SIGLEC7     | SIGLEC7  | 0           | 0           | 11.60712479 | 0           |
| PPP1R11     | PPP1R11  | 1253.367305 | 302.6461937 | 377.6779835 |             |
| 1895.878746 |          |             |             |             |             |

|             |          |             |             |             |
|-------------|----------|-------------|-------------|-------------|
| MAGEF1      | MAGEF1   | 870.3288859 | 845.9875146 | 1358.0336   |
| 1450.898752 |          |             |             |             |
| RTEL1       | RTEL1    | 2373.198281 | 2282.033548 | 1070.534048 |
| 1333.997228 |          |             |             |             |
| LRRC4       | LRRC4    | 0           | 2.031182508 | 1.785711506 |
| LIAS        | LIAS     | 693.4518176 | 796.2235432 | 699.1060546 |
| 984.2354106 |          |             |             |             |
| ST13        | ST13     | 8162.115312 | 9965.996976 | 15809.79682 |
| 12117.22005 |          |             |             |             |
| CORIN       | CORIN    | 0           | 6.093547524 | 6.249990271 |
| ANXA8L1     | ANXA8L1  | 2.342742627 | 1.015591254 | 0           |
| RPL4        | RPL4     | 24773.33191 | 34313.7817  | 24732.99721 |
| 26174.6283  |          |             |             |             |
| FAM189A2    | FAM189A2 | 0           | 0           | 0           |
| LRP5        | LRP5     | 1587.20813  | 2046.416377 | 305.3566675 |
| 324.3074533 |          |             |             |             |
| ZW10        | ZW10     | 3511.771198 | 3830.81021  | 1980.35406  |
| 2470.016069 |          |             |             |             |
| CCRL2       | CCRL2    | 537.6594329 | 616.4638912 | 173.2140161 |
| 263.9711829 |          |             |             |             |
| HLA-DQB1    | HLA-DQB1 | 299.999533  | 2901.486743 | 923.1724499 |
| 1140.732612 |          |             |             |             |
| SLC20A2     | SLC20A2  | 1362.304838 | 2428.278688 | 1618.74748  |
| 1396.219007 |          |             |             |             |
| KCNS1       | KCNS1    | 29.28428284 | 9.140321286 | 0           |
| SRSF12      | SRSF12   | 8.199599194 | 2.031182508 | 18.85508449 |
| 48.08046546 |          |             |             | 58.9284797  |
| DPH3P1      | DPH3P1   | 15.22782708 | 13.2026863  | 36.60708587 |
| 51.85148236 |          |             |             |             |
| ROM01       | ROM01    | 5032.211163 | 5305.448711 | 2797.317074 |
| 3071.493264 |          |             |             |             |
| TSGA10      | TSGA10   | 37.48388203 | 62.96665775 | 537.4991633 |
| 235.6885562 |          |             |             |             |
| YTHDF3      | YTHDF3   | 5130.606353 | 4548.833227 | 5119.634888 |
| 5310.534548 |          |             |             |             |
| STK25       | STK25    | 4645.658629 | 5318.651397 | 4208.029164 |
| 4519.563753 |          |             |             |             |
| CRAT        | CRAT     | 1475.927855 | 1372.063784 | 1887.497062 |
| 1791.233027 |          |             |             |             |
| TANG02      | TANG02   | 3071.335584 | 3847.05967  | 2154.460932 |
| 2369.141367 |          |             |             |             |
| SNX5        | SNX5     | 4626.916688 | 5153.110023 | 5068.74211  |
| 5386.89764  |          |             |             |             |
| MZF1        | MZF1     | 461.5202975 | 465.1407944 | 838.3915521 |
| 496.8314764 |          |             |             |             |
| TMEM161A    | TMEM161A | 1281.248006 | 1135.058803 | 1424.874529 |
| 1174.671764 |          |             |             |             |
| SSUH2       | SSUH2    | 0           | 0           | 16.96425931 |
| SFSWAP      | SFSWAP   | 1529.810935 | 1377.14174  | 8.484788022 |
| 1345.310279 |          |             |             | 1716.961613 |

|              |              |             |             |             |             |
|--------------|--------------|-------------|-------------|-------------|-------------|
| TNIP1        | TNIP1        | 10213.18648 | 7859.660715 | 5675.884022 |             |
| 6621.905674  |              |             |             |             |             |
| CEACAM20     | CEACAM20     |             | 0           | 0           | 0.892855753 |
| ALG9         | ALG9         | 1468.899627 | 1720.411584 | 1333.033639 | 0           |
| 1252.920365  |              |             |             |             |             |
| NT5C         | NT5C         | 2188.121614 | 2523.744266 | 1848.211409 |             |
| 1975.070101  |              |             |             |             |             |
| TRPM1        | TRPM1        | 0           | 1.015591254 | 8.035701777 | 5.656525348 |
| CGNL1        | CGNL1        | 0           | 3.046773762 | 19.64282657 | 0           |
| C6orf106     | C6orf106     |             | 3277.496935 | 3359.575868 |             |
| 2584.817405  |              | 2279.579715 |             |             |             |
| NAIF1        | NAIF1        | 978.0950467 | 1084.651459 | 939.2842522 |             |
| 705.1801601  |              |             |             |             |             |
| PTPRN2       | PTPRN2       | 367.8105924 | 340.2230701 | 172.3211603 |             |
| 306.395123   |              |             |             |             |             |
| LGMM         | LGMM         | 19038.29796 | 11368.5285  | 1975.889781 |             |
| 3668.256688  |              |             |             |             |             |
| LOC100289656 | LOC100289656 |             | 0           | 0           | 0.892855753 |
| SZRD1        | SZRD1        | 5852.171082 | 5364.353004 | 3869.636834 | 0           |
| 4240.508503  |              |             |             |             |             |
| RBM46        | RBM46        | 2.342742627 | 0           | 0           | 0.942754225 |
| EFS          | EFS          | 0           | 0           | 1.785711506 | 0           |
| RNF216       | RNF216       | 3201.3578   | 3429.651665 | 6288.383069 |             |
| 6086.421275  |              |             |             |             |             |
| LRRC20       | LRRC20       | 726.2502143 | 683.492914  | 401.7850889 |             |
| 396.8995286  |              |             |             |             |             |
| ADAM15       | ADAM15       | 2660.184253 | 3595.193039 | 1981.246916 |             |
| 1804.431586  |              |             |             |             |             |
| C19orf83     | C19orf83     |             | 315.0988833 | 319.911245  |             |
| 422.3207712  |              | 375.2161814 |             |             |             |
| CD8B         | CD8B         | 322.1271112 | 1044.027809 | 3166.959356 |             |
| 159.325464   |              |             |             |             |             |
| AGBL5        | AGBL5        | 6380.459544 | 7845.442438 | 6108.026206 |             |
| 5975.176276  |              |             |             |             |             |
| ILK          | ILK          | 10377.17847 | 14561.5474  | 11124.08983 |             |
| 10038.44698  |              |             |             |             |             |
| VASP         | VASP         | 5445.705236 | 5087.096592 | 2772.317113 |             |
| 3166.711441  |              |             |             |             |             |
| LEPR         | LEPR         | 565.7723444 | 787.0832219 | 669.6418148 |             |
| 701.4091432  |              |             |             |             |             |
| FAM115A      | FAM115A      | 1102.260406 | 845.9875146 | 1071.426904 |             |
| 1530.090107  |              |             |             |             |             |
| NCBP1        | NCBP1        | 9064.071224 | 9927.404508 | 6440.168547 |             |
| 8363.172727  |              |             |             |             |             |
| TCF7L2       | TCF7L2       | 1.171371313 | 3.046773762 | 59.82133545 |             |
| 35.82466054  |              |             |             |             |             |
| SERINC2      | SERINC2      | 4.685485254 | 19.29623383 | 24.10710533 |             |
| 24.51160984  |              |             |             |             |             |
| GCDH         | GCDH         | 1937.448152 | 2081.962071 | 1854.461399 |             |
| 1560.258242  |              |             |             |             |             |

|              |              |             |             |             |             |
|--------------|--------------|-------------|-------------|-------------|-------------|
| KEL          | KEL          | 0           | 0           | 18.74997081 | 1.885508449 |
| ZNF821       | ZNF821       | 206.1613512 |             | 218.3521196 | 212.4996692 |
| 167.810252   |              |             |             |             |             |
| HPSE         | HPSE         | 1522.782708 |             | 1260.348746 | 1058.926923 |
| 1417.902354  |              |             |             |             |             |
| TXLNG        | TXLNG        | 1385.732264 |             | 1979.387354 | 3002.673897 |
| 1918.504847  |              |             |             |             |             |
| SPDYE2B      | SPDYE2B      | 101.9093043 |             | 116.7929942 | 141.071209  |
| 207.4059294  |              |             |             |             |             |
| TMEM187      | TMEM187      | 584.5142854 |             | 627.635395  | 762.4988131 |
| 519.4575778  |              |             |             |             |             |
| NAA10        | NAA10        | 3988.519322 |             | 5488.255137 | 3275.887758 |
| 3716.337154  |              |             |             |             |             |
| NRIP1        | NRIP1        | 1636.405725 |             | 1984.46531  | 2810.709911 |
| 2202.273869  |              |             |             |             |             |
| A1CF         | A1CF         | 2.342742627 | 0           | 1.785711506 | 0           |
| DDIT3        | DDIT3        | 1138.572917 | 1360.89228  |             | 7219.631619 |
| 3790.814738  |              |             |             |             |             |
| DAZL         | DAZL         | 5.856856567 | 26.40537261 | 0           | 22.62610139 |
| ARG2         | ARG2         | 2545.389864 | 3884.636547 |             | 2471.424724 |
| 3050.752671  |              |             |             |             |             |
| PEX11B       | PEX11B       | 2367.341425 | 3383.950058 |             | 2664.281567 |
| 2892.369961  |              |             |             |             |             |
| JRK          | JRK          | 1213.540681 | 854.1122447 |             | 503.5706447 |
| 977.636131   |              |             |             |             |             |
| TRAF3IP2     | TRAF3IP2     |             | 878.5284851 |             | 1646.273423 |
| 955.3556557  | 730.6345242  |             |             |             |             |
| IP6K2        | IP6K2        | 3922.922529 | 4761.091799 |             | 3502.673119 |
| 4070.812742  |              |             |             |             |             |
| MIR3942      | MIR3942      | 1.171371313 | 0           | 0           | 0.942754225 |
| MIR3928      | MIR3928      | 0           | 1.015591254 | 0           | 0           |
| MIR3940      | MIR3940      | 333.8408243 | 106.6370817 |             | 80.35701777 |
| 100.874702   |              |             |             |             |             |
| MIR3939      | MIR3939      | 22.25605496 | 11.17150379 |             | 6.249990271 |
| 8.484788022  |              |             |             |             |             |
| LOC151484    | LOC151484    |             | 11.71371313 |             | 18.28064257 |
| 4.464278765  | 0            |             |             |             |             |
| HLA-F        | HLA-F        | 470.891268  | 717.0074254 |             | 1231.248083 |
| 736.2910495  |              |             |             |             |             |
| UBP1         | UBP1         | 2765.607671 | 1425.890121 |             | 1591.961808 |
| 1875.138153  |              |             |             |             |             |
| APP          | APP          | 295.185571  | 132.026863  |             | 219.6425152 |
| 242.2878358  |              |             |             |             |             |
| LOC100652758 | LOC100652758 |             | 66.76816487 |             | 53.82633646 |
| 137.499786   | 66.93554995  |             |             |             |             |
| CNIH4        | CNIH4        | 2974.111765 | 2842.63992  |             | 2303.567843 |
| 2318.232639  |              |             |             |             |             |
| ZNF503-AS1   | ZNF503-AS1   |             | 0           | 0           | 0           |
| PROSER2-AS1  | PROSER2-AS1  |             | 0           | 8.124730032 | 4.713771124 |
| 11.3130507   |              |             |             |             | 8.035701777 |

|             |         |             |             |             |
|-------------|---------|-------------|-------------|-------------|
| ARMCX5      | ARMCX5  | 581.0001715 | 574.8246498 | 715.1774582 |
| 1124.70579  |         |             |             |             |
| KTN1        | KTN1    | 3548.083708 | 2758.345846 | 3295.530584 |
| 4293.302739 |         |             |             |             |
| PTH1R       | PTH1R   | 0           | 0           | 3.771016899 |
| RILP        | RILP    | 138.221815  | 344.2854351 | 146.4283435 |
| 168.7530062 |         |             |             |             |
| CPVL        | CPVL    | 24.59879758 | 249.8354485 | 0           |
| POM121      | POM121  | 3789.386199 | 2553.196413 | 30.16813519 |
| 3019.641782 |         |             |             | 2511.603233 |
| ZNF749      | ZNF749  | 274.1008873 | 262.0225435 | 324.1066384 |
| 336.5632582 |         |             |             |             |
| LDLRAD2     | LDLRAD2 | 0           | 2.678567259 | 0           |
| TM2D2       | TM2D2   | 1675.060978 | 2195.708291 | 2215.175123 |
| 1828.000442 |         |             |             |             |
| AGAP6       | AGAP6   | 233.1028914 | 180.7752432 | 332.1423401 |
| 294.1393181 |         |             |             |             |
| TNFAIP8     | TNFAIP8 | 9639.214538 | 7401.62906  | 10717.84046 |
| 14686.22531 |         |             |             |             |
| SGOL1       | SGOL1   | 2548.903978 | 2676.082954 | 795.5344759 |
| 1254.805873 |         |             |             |             |
| MARK3       | MARK3   | 5251.257598 | 5305.448711 | 6254.45455  |
| 6206.151061 |         |             |             |             |
| MIR7161     | MIR7161 | 12.88508445 | 17.26505132 | 6.249990271 |
| 6.599279573 |         |             |             |             |
| CHRNA3      | CHRNA3  | 45.68348122 | 35.54569389 | 21.42853807 |
| 32.99639787 |         |             |             |             |
| ANKS1B      | ANKS1B  | 235.445634  | 99.5279429  | 53.57134518 |
| 121.615295  |         |             |             |             |
| USP1        | USP1    | 7379.639275 | 6581.031326 | 6161.597552 |
| 6843.452917 |         |             |             |             |
| SDC2        | SDC2    | 8.199599194 | 6.093547524 | 20.53568232 |
| 10.37029647 |         |             |             |             |
| SIAH1       | SIAH1   | 1021.435785 | 923.1724499 | 1356.247889 |
| 1141.675366 |         |             |             |             |
| SHC1        | SHC1    | 3220.099741 | 2743.111977 | 2481.246138 |
| 2885.770682 |         |             |             |             |
| RIT2        | RIT2    | 0           | 1.785711506 | 0           |
| SRC         | SRC     | 56.22582305 | 88.3564391  | 164.2854586 |
| 98.9891936  |         |             |             |             |
| RPL37       | RPL37   | 10067.93644 | 8121.683259 | 8839.271955 |
| 9219.193563 |         |             |             |             |
| TP53I11     | TP53I11 | 577.4860575 | 547.4036859 | 1449.997743 |
| 1998.638956 |         |             |             |             |
| RUNX1T1     | RUNX1T1 | 1.171371313 | 0           | 1.785711506 |
| GABBR1      | GABBR1  | 0           | 7.109138778 | 14.28569205 |
| USP5        | USP5    | 9171.837384 | 11731.09458 | 6395.525759 |
| 7520.350451 |         |             |             |             |
| PIGG        | PIGG    | 2640.270941 | 3048.804945 | 2197.318008 |
| 2565.234245 |         |             |             |             |
|             |         |             |             | 1.885508449 |
|             |         |             |             | 0           |

|             |             |             |             |             |             |
|-------------|-------------|-------------|-------------|-------------|-------------|
| FAM210A     | FAM210A     | 1050.720068 | 1075.511138 | 1043.748375 |             |
| 887.1317255 |             |             |             |             |             |
| ANKRD19P    | ANKRD19P    |             | 28.11291152 | 22.34300759 |             |
| 43.7499319  | 58.45076193 |             |             |             |             |
| INPP5J      | INPP5J      | 0           | 2.031182508 | 1.785711506 | 11.3130507  |
| SMEK1       | SMEK1       | 11078.82988 | 10874.95115 | 15632.11852 |             |
| 12640.44865 |             |             |             |             |             |
| SMIM6       | SMIM6       | 1.171371313 | 8.124730032 | 0           | 5.656525348 |
| MPC2        | MPC2        | 2709.381848 | 2850.76465  | 2511.603233 |             |
| 2400.252256 |             |             |             |             |             |
| CECR6       | CECR6       | 2.342742627 | 0           | 0           | 0           |
| C17orf99    | C17orf99    |             | 5.856856567 | 5.07795627  | 0           |
| 0           |             |             |             |             |             |
| TRMT1       | TRMT1       | 2165.865559 | 2538.978135 | 3541.958772 |             |
| 3196.879576 |             |             |             |             |             |
| ZNF83       | ZNF83       | 856.2724301 | 539.2789559 | 1638.390307 |             |
| 1773.320697 |             |             |             |             |             |
| PQLC1       | PQLC1       | 2149.46636  | 1451.279902 | 1127.676816 |             |
| 961.6093092 |             |             |             |             |             |
| EIF4E       | EIF4E       | 6916.947606 | 8825.487998 | 7074.988987 |             |
| 7108.366854 |             |             |             |             |             |
| ASNS        | ASNS        | 3674.59181  | 4574.223008 | 4685.706992 |             |
| 4963.600993 |             |             |             |             |             |
| RBM24       | RBM24       | 0           | 0           | 6.599279573 |             |
| COQ6        | COQ6        | 1350.591124 | 1877.828229 | 1739.283007 |             |
| 1625.308283 |             |             |             |             |             |
| STK11       | STK11       | 5551.128654 | 6347.445338 | 4571.421456 |             |
| 4199.970071 |             |             |             |             |             |
| PSEN2       | PSEN2       | 953.4962492 | 1650.335788 | 656.2489785 |             |
| 760.8026593 |             |             |             |             |             |
| BLMH        | BLMH        | 4967.78574  | 5025.145525 | 2782.138526 |             |
| 2835.804708 |             |             |             |             |             |
| DGUOK-AS1   | DGUOK-AS1   |             | 1605.950071 | 2275.94     | 2371.42488  |
| 2157.96442  |             |             |             |             |             |
| CCDC84      | CCDC84      | 5580.412937 | 5353.1815   | 9906.23458  |             |
| 8409.367684 |             |             |             |             |             |
| EPPK1       | EPPK1       | 62.08267961 | 63.98224901 | 341.9637534 |             |
| 408.2125793 |             |             |             |             |             |
| PARP1       | PARP1       | 27114.90316 | 32678.67978 | 17774.07948 |             |
| 20896.14739 |             |             |             |             |             |
| SLC25A11    | SLC25A11    |             | 7485.062693 | 10689.09795 |             |
| 5372.313066 | 6176.92568  |             |             |             |             |
| PLA2G10     | PLA2G10     | 0           | 0           | 9.821413283 | 0.942754225 |
| RUVBL1      | RUVBL1      | 6442.542224 | 8991.029372 | 4491.957293 |             |
| 4928.719087 |             |             |             |             |             |
| CASK        | CASK        | 1539.181906 | 2218.051299 | 1724.997315 |             |
| 2480.386365 |             |             |             |             |             |
| SEH1L       | SEH1L       | 5507.787916 | 5631.453504 | 5055.349274 |             |
| 5604.673866 |             |             |             |             |             |
| RYR1        | RYR1        | 209.6754651 | 173.6661044 | 65.17846997 |             |

|             |             |             |             |             |             |
|-------------|-------------|-------------|-------------|-------------|-------------|
| 103.7029647 |             |             |             |             |             |
| CD274       | CD274       | 729.7643283 | 613.4171174 | 2960.709677 |             |
| 2524.695814 |             |             |             |             |             |
| KIAA0895L   | KIAA0895L   |             | 496.6614369 | 306.7085587 |             |
| 196.4282657 |             | 185.7225823 |             |             |             |
| LPHN3-AS1   | LPHN3-AS1   |             | 0           | 0           | 1.885508449 |
| TMEM220-AS1 | TMEM220-AS1 |             | 5.856856567 | 10.15591254 |             |
| 70.53560449 |             | 44.30944856 |             |             |             |
| CD37        | CD37        | 2405.996678 | 1855.485221 | 2160.710922 |             |
| 2289.950012 |             |             |             |             |             |
| ARL16       | ARL16       | 1284.994331 | 1494.950326 | 1878.568504 |             |
| 1476.353116 |             |             |             |             |             |
| ZNF385A     | ZNF385A     | 1.171371313 | 1.015591254 | 34.82137437 |             |
| 2.828262674 |             |             |             |             |             |
| TCEAL4      | TCEAL4      | 310.4133981 | 205.1494333 | 505.3563562 |             |
| 617.5040172 |             |             |             |             |             |
| GDF9        | GDF9        | 3035.023073 | 3396.137154 | 2090.175318 |             |
| 2207.930394 |             |             |             |             |             |
| C4orf3      | C4orf3      | 3739.017233 | 3448.947899 | 7042.84618  |             |
| 6933.957323 |             |             |             |             |             |
| LIMCH1      | LIMCH1      | 2.342742627 | 0           | 0           | 0.942754225 |
| NOS3        | NOS3        | 407.6372171 | 1109.025649 | 855.3558114 |             |
| 411.040842  |             |             |             |             |             |
| F12         | F12         | 23.42742627 | 45.70160643 | 35.71423012 |             |
| 22.62610139 |             |             |             |             |             |
| HDAC2       | HDAC2       | 7370.268304 | 7706.306436 | 6619.632553 |             |
| 6977.324017 |             |             |             |             |             |
| ZNF222      | ZNF222      | 133.5363297 | 99.5279429  | 393.7493871 |             |
| 321.4791906 |             |             |             |             |             |
| PSMD6-AS2   | PSMD6-AS2   |             | 340.8690522 | 214.2897546 |             |
| 486.6063854 |             | 407.2698251 |             |             |             |
| PITRM1-AS1  | PITRM1-AS1  |             | 1684.431949 | 2249.534628 |             |
| 1466.069146 |             | 2091.02887  |             |             |             |
| LINC01021   | LINC01021   |             | 16.39919839 | 5.07795627  | 0           |
|             | 10.37029647 |             |             |             |             |
| LINC00665   | LINC00665   |             | 4.685485254 | 23.35859884 |             |
| 85.71415229 |             | 54.67974503 |             |             |             |
| EFCAB14-AS1 | EFCAB14-AS1 |             | 742.6494127 | 989.1858814 |             |
| 1124.998249 |             | 1102.079689 |             |             |             |
| TBC1D2B     | TBC1D2B     | 5034.553905 | 3490.58714  | 3233.030682 |             |
| 4249.936045 |             |             |             |             |             |
| CRLS1       | CRLS1       | 2797.234697 | 3268.172656 | 2782.138526 |             |
| 2478.500857 |             |             |             |             |             |
| SGSM2       | SGSM2       | 1726.601316 | 770.8337618 | 1491.961963 |             |
| 1535.746632 |             |             |             |             |             |
| SRGAP3      | SRGAP3      | 154.6210134 | 239.679536  | 170.5354488 |             |
| 42.42394011 |             |             |             |             |             |
| TRIP4       | TRIP4       | 2546.561235 | 3150.36407  | 2355.353476 |             |
| 2240.926792 |             |             |             |             |             |
| CD96        | CD96        | 12641.43921 | 12401.3848  | 10085.69859 |             |



|             |          |             |             |             |             |
|-------------|----------|-------------|-------------|-------------|-------------|
| 12715.86898 |          |             |             |             |             |
| QRFP        | QRFP     | 1.171371313 | 0           | 0           | 0.942754225 |
| TEX9        | TEX9     | 15.22782708 | 14.21827756 |             | 22.32139383 |
| 20.74059294 |          |             |             |             |             |
| SYF2        | SYF2     | 2288.859547 | 2530.853405 |             | 3788.38696  |
| 3071.493264 |          |             |             |             |             |
| CES1        | CES1     | 1.171371313 | 17.26505132 |             | 4.464278765 |
| EFTUD1      | EFTUD1   | 2204.520812 | 2966.542053 |             | 2315.174968 |
| 2501.126958 |          |             |             |             | 0           |
| C2orf194    | C2orf194 |             | 119.479874  |             | 86.32525659 |
| 274.1067162 |          | 190.4363534 |             |             |             |
| U2AF2       | U2AF2    | 1154.972115 | 644.9004463 |             | 648.2132767 |
| 642.015627  |          |             |             |             |             |
| HHLA3       | HHLA3    | 405.2944745 | 463.1096118 |             | 729.4631502 |
| 557.1677468 |          |             |             |             |             |
| TROVE2      | TROVE2   | 4864.705065 | 5345.05677  |             | 5214.277598 |
| 5832.820388 |          |             |             |             |             |
| RALGDS      | RALGDS   | 7625.627251 | 7904.34673  |             | 6273.204521 |
| 6159.01335  |          |             |             |             |             |
| ABCE1       | ABCE1    | 9722.381902 | 10136.61631 |             | 9917.841705 |
| 10398.5791  |          |             |             |             |             |
| PRKCSH      | PRKCSH   | 3843.269279 | 2379.530308 |             | 2037.496828 |
| 1914.73383  |          |             |             |             |             |
| LACE1       | LACE1    | 145.2500429 | 179.759652  |             | 147.3211993 |
| 106.5312274 |          |             |             |             |             |
| NUDCD1      | NUDCD1   | 2860.488747 | 3502.774235 |             | 2746.424296 |
| 2835.804708 |          |             |             |             |             |
| RASGEF1A    | RASGEF1A |             | 57.39719436 |             | 25.38978135 |
| 39.28565313 |          | 192.3218618 |             |             |             |
| KCTD4       | KCTD4    | 4.685485254 | 2.031182508 | 0           | 7.542033798 |
| ZNHIT6      | ZNHIT6   | 1690.288805 | 1899.155645 |             | 1797.318631 |
| 1958.100525 |          |             |             |             |             |
| LAS1L       | LAS1L    | 5170.432978 | 7166.011889 |             | 4495.528717 |
| 4783.534936 |          |             |             |             |             |
| SCAPER      | SCAPER   | 993.3228738 | 1094.807372 |             | 2101.782443 |
| 1644.163368 |          |             |             |             |             |
| IL27RA      | IL27RA   | 14439.49418 | 20172.68908 |             | 10806.23318 |
| 13090.14241 |          |             |             |             |             |
| C6orf48     | C6orf48  | 1.171371313 | 0           | 1.785711506 | 0           |
| BCL11A      | BCL11A   | 3.51411394  | 0           | 3.571423012 | 19.79783872 |
| GPR155      | GPR155   | 1017.921671 | 742.3972067 |             | 2815.174189 |
| 2685.906786 |          |             |             |             |             |
| LRRC75A     | LRRC75A  | 231.9315201 | 347.3322089 |             | 503.5706447 |
| 339.3915209 |          |             |             |             |             |
| LRP8        | LRP8     | 2312.286973 | 3065.054405 |             | 2403.567687 |
| 1990.154168 |          |             |             |             |             |
| KCTD18      | KCTD18   | 933.5829368 | 876.4552522 |             | 966.0699248 |
| 961.6093092 |          |             |             |             |             |
| TRMT10B     | TRMT10B  | 516.5747492 | 476.3122981 |             | 572.3205377 |
| 757.9743967 |          |             |             |             |             |

|             |             |             |            |             |             |             |
|-------------|-------------|-------------|------------|-------------|-------------|-------------|
| VN1R10P     | VN1R10P     | 0           | 0          | 0           | 0.942754225 |             |
| RPA30S      | RPA30S      | 1229.939879 |            | 1092.776189 |             | 1669.640258 |
| 1903.42078  |             |             |            |             |             |             |
| LOC400548   | LOC400548   |             |            | 0           | 0           | 2.678567259 |
| LOC728730   | LOC728730   |             |            | 19.91331233 |             | 54.84192772 |
| 80.35701777 | 59.39351616 |             |            |             |             |             |
| LOC400685   | LOC400685   |             |            | 49.19759517 |             | 12.18709505 |
| 55.35705669 | 83.905126   |             |            |             |             |             |
| WFDC21P     | WFDC21P     | 2.342742627 |            | 0           | 2.678567259 | 10.37029647 |
| MIR320A     | MIR320A     | 0           | 5.07795627 |             | 5.357134518 | 2.828262674 |
| USP3-AS1    | USP3-AS1    |             |            | 825.816776  |             | 785.0520394 |
| 1022.319837 | 1119.049265 |             |            |             |             |             |
| LOC643733   | LOC643733   |             |            | 71.45365012 |             | 25.38978135 |
| 478.5706836 | 484.5756715 |             |            |             |             |             |
| LOC440434   | LOC440434   |             |            | 452.149327  |             | 310.7709237 |
| 310.7138021 | 379.9299526 |             |            |             |             |             |
| THAP9-AS1   | THAP9-AS1   |             |            | 981.6091607 |             | 802.3170907 |
| 1759.818689 | 1505.578497 |             |            |             |             |             |
| LOC283038   | LOC283038   |             |            | 50.36896648 |             | 54.84192772 |
| 21.42853807 | 65.99279573 |             |            |             |             |             |
| LOC285484   | LOC285484   |             |            | 37.48388203 |             | 25.38978135 |
| 12.49998054 | 21.68334717 |             |            |             |             |             |
| RNF213      | RNF213      | 42448.15366 |            | 28846.85398 |             | 21387.46671 |
| 23916.73193 |             |             |            |             |             |             |
| TIAM2       | TIAM2       | 525.9457197 |            | 367.644034  |             | 530.3563173 |
| 592.9924073 |             |             |            |             |             |             |
| LHFP        | LHFP        | 119.479874  |            | 150.3075056 |             | 281.2495622 |
| 103.7029647 |             |             |            |             |             |             |
| HRSP12      | HRSP12      | 709.851016  |            | 793.1767694 |             | 521.4277598 |
| 652.3859235 |             |             |            |             |             |             |
| C8orf58     | C8orf58     | 290.5000857 |            | 311.786515  |             | 485.7135296 |
| 510.0300356 |             |             |            |             |             |             |
| SPDYA       | SPDYA       | 253.0162037 |            | 240.6951272 |             | 341.0708977 |
| 297.910335  |             |             |            |             |             |             |
| PIK3R5      | PIK3R5      | 8491.270651 |            | 5775.667462 |             | 2894.638351 |
| 3726.70745  |             |             |            |             |             |             |
| RPGRIP1L    | RPGRIP1L    |             |            | 248.3307185 |             | 302.6461937 |
| 174.9997276 | 282.8262674 |             |            |             |             |             |
| SRRM5       | SRRM5       | 415.8368163 |            | 367.644034  |             | 311.6066578 |
| 288.4827928 |             |             |            |             |             |             |
| C1orf228    | C1orf228    |             |            | 76.13913537 |             | 193.9779295 |
| 608.9276236 | 606.1909665 |             |            |             |             |             |
| ORMDL1      | ORMDL1      | 4525.007384 |            | 4599.61279  |             | 6053.562006 |
| 5710.262339 |             |             |            |             |             |             |
| FAM71F2     | FAM71F2     | 2.342742627 |            | 5.07795627  |             | 18.74997081 |
| 10.37029647 |             |             |            |             |             |             |
| SYCE1       | SYCE1       | 36.31251072 |            | 30.46773762 |             | 12.49998054 |
| 66.93554995 |             |             |            |             |             |             |
| SLC05A1     | SLC05A1     | 45.68348122 |            | 63.98224901 | 0           | 20.74059294 |
| CDK16       | CDK16       | 2143.609504 |            | 2467.886747 |             | 2488.388984 |

|                 |               |  |               |  |               |
|-----------------|---------------|--|---------------|--|---------------|
| 2023.150566     |               |  |               |  |               |
| CALC0C01        | CALC0C01      |  | 2456.365644   |  | 1956.028755   |
| 3670.530001     | 3883.204652   |  |               |  |               |
| GM2A GM2A       | 1720.744459   |  | 2170.31851    |  | 1473.211993   |
| 1251.97761      |               |  |               |  |               |
| FBXL19 FBXL19   | 85.51010588   |  | 45.70160643   |  | 36.60708587   |
| 61.27902461     |               |  |               |  |               |
| SLC25A19        | SLC25A19      |  | 2810.119781   |  | 3999.398358   |
| 2598.210241     | 2696.277083   |  |               |  |               |
| HDAC8 HDAC8     | 1821.482392   |  | 1875.797046   |  | 974.1056266   |
| 1296.287059     |               |  |               |  |               |
| IGF2 IGF2       | 0 0           |  | 14.28569205   |  | 30.16813519   |
| 9-Sep 9-Sep     | 18437.38447   |  | 7184.292531   |  | 5186.599069   |
| 6358.877246     |               |  |               |  |               |
| MTRNR2L3        | MTRNR2L3      |  | 21.08468364   |  | 18.28064257 0 |
| 13.19855915     |               |  |               |  |               |
| TMEM116 TMEM116 | 654.7965642   |  | 648.9628113   |  | 1004.462722   |
| 976.6933768     |               |  |               |  |               |
| NUDT16L1        | NUDT16L1      |  | 3140.446491   |  | 5327.791719   |
| 3574.994435     | 2651.02488    |  |               |  |               |
| FAHD1 FAHD1     | 800.0466071   |  | 1089.729416   |  | 947.319954    |
| 880.5324459     |               |  |               |  |               |
| CABP1 CABP1     | 0 2.031182508 |  | 9.821413283   |  | 0             |
| LINC01355       | LINC01355     |  | 55.05445173   |  | 35.54569389   |
| 27.67852834     | 97.10368515   |  |               |  |               |
| TACR1 TACR1     | 1.171371313   |  | 0 0           |  | 1.885508449   |
| VCPIP1 VCP1P1   | 3104.133981   |  | 2445.54374    |  | 4724.099789   |
| 3782.32995      |               |  |               |  |               |
| PEA15 PEA15     | 1584.865387   |  | 507.795627    |  | 679.4632281   |
| 607.1337207     |               |  |               |  |               |
| FKBP1B FKBP1B   | 67.93953618   |  | 93.43439537   |  | 53.57134518   |
| 75.42033798     |               |  |               |  |               |
| ZDHHC8 ZDHHC8   | 476.7481246   |  | 107.6526729   |  | 219.6425152   |
| 345.0480462     |               |  |               |  |               |
| SFI1 SFI1       | 4124.398395   |  | 3854.168809   |  | 4955.349429   |
| 4922.119807     |               |  |               |  |               |
| GPR68 GPR68     | 3830.384195   |  | 4241.109077   |  | 1240.176641   |
| 1838.370738     |               |  |               |  |               |
| SH3YL1 SH3YL1   | 207.3327225   |  | 242.7263097   |  | 671.4275263   |
| 463.8350786     |               |  |               |  |               |
| ATN1 ATN1       | 255.3589463   |  | 122.8865417   |  | 159.8211798   |
| 161.2109724     |               |  |               |  |               |
| MPP3 MPP3       | 0 0           |  | 5.357134518   |  | 0             |
| PDGFB PDGFB     | 35.1411394    |  | 0 147.3211993 |  | 170.6385147   |
| IL11 IL11       | 0 2.031182508 |  | 0             |  | 0.942754225   |
| ATP5D ATP5D     | 3891.295503   |  | 4836.245552   |  | 2989.281061   |
| 2877.285894     |               |  |               |  |               |
| MYC MYC         | 2436.452332   |  | 3785.108604   |  | 5659.812618   |
| 5794.167465     |               |  |               |  |               |
| F7 F7           | 0 0           |  | 0 1.885508449 |  |               |

|             |             |             |             |               |
|-------------|-------------|-------------|-------------|---------------|
| ERCC8       | ERCC8       | 867.9861433 | 836.8471933 | 584.8205182   |
| 652.3859235 |             |             |             |               |
| FNDC3B      | FNDC3B      | 812.9316915 | 782.0052656 | 1227.67666    |
| 1148.274646 |             |             |             |               |
| ALDH4A1     | ALDH4A1     | 1010.893444 | 1055.199313 | 324.1066384   |
| 581.6793566 |             |             |             |               |
| EPRS        | EPRS        | 9273.746689 | 10958.22963 | 12683.01597   |
| 12894.99229 |             |             |             |               |
| PRSS12      | PRSS12      | 11.71371313 | 5.07795627  | 15.1785478    |
| 6.599279573 |             |             |             |               |
| MAP4K3      | MAP4K3      | 197.961752  | 255.928996  | 449.1064438   |
| 462.8923243 |             |             |             |               |
| SOCS5       | SOCS5       | 238.9597479 | 193.9779295 | 671.4275263   |
| 453.4647821 |             |             |             |               |
| ALKBH6      | ALKBH6      | 1609.464185 | 1943.84166  | 1221.42667    |
| 1430.158159 |             |             |             |               |
| ANKRD20A3   | ANKRD20A3   |             | 5.856856567 | 4.062365016   |
| 11.60712479 | 7.542033798 |             |             |               |
| RUNX2       | RUNX2       | 3179.101745 | 1200.428862 | 884.8200513   |
| 2104.22743  |             |             |             |               |
| C20orf27    | C20orf27    |             | 1616.492413 | 2357.187301   |
| 1592.854663 | 1486.723412 |             |             |               |
| GLB1        | GLB1        | 5318.025763 | 8902.672933 | 5451.777228   |
| 4705.286336 |             |             |             |               |
| AHCYL2      | AHCYL2      | 1734.800915 | 2283.049139 | 1644.640297   |
| 1721.469214 |             |             |             |               |
| APBB2       | APBB2       | 5.856856567 | 36.56128515 | 30.3570956    |
| 51.85148236 |             |             |             |               |
| PRR7        | PRR7        | 125.3367305 | 164.5257832 | 141.9640647   |
| 109.3594901 |             |             |             |               |
| SLIT1       | SLIT1       | 12.88508445 | 5.07795627  | 0 10.37029647 |
| EZH2        | EZH2        | 9422.510845 | 9222.584178 | 5782.133857   |
| 5765.884838 |             |             |             |               |
| AGAP7P      | AGAP7P      | 10.54234182 | 12.18709505 | 33.03566286   |
| 30.16813519 |             |             |             |               |
| PCGF6       | PCGF6       | 1103.431777 | 914.0321286 | 757.1416786   |
| 814.5396502 |             |             |             |               |
| PPP6C       | PPP6C       | 6722.499968 | 6140.264722 | 5598.205572   |
| 6043.05458  |             |             |             |               |
| POLG        | POLG        | 7981.72413  | 7361.005409 | 6581.239756   |
| 6658.673089 |             |             |             |               |
| OVGP1       | OVGP1       | 14.05645576 | 14.21827756 | 86.60700804   |
| 35.82466054 |             |             |             |               |
| AGL         | AGL         | 2012.415917 | 1441.12399  | 1417.854936   |
| 1543.288666 |             |             |             |               |
| SMC3        | SMC3        | 6820.895158 | 6315.962009 | 6335.704424   |
| 7378.937317 |             |             |             |               |
| RERE        | RERE        | 968.7240762 | 550.4504597 | 955.3556557   |
| 901.2730388 |             |             |             |               |
| NRBP1       | NRBP1       | 12629.7255  | 16108.29288 | 11129.44696   |

|             |         |             |             |             |
|-------------|---------|-------------|-------------|-------------|
| 11649.61395 |         |             |             |             |
| TRA2A       | TRA2A   | 3648.821641 | 2263.752905 | 2080.353905 |
| 2369.141367 |         |             |             |             |
| EEF2K       | EEF2K   | 1382.21815  | 1253.239608 | 492.8563757 |
| 887.1317255 |         |             |             |             |
| CCDC106     | CCDC106 | 128.8508445 | 95.46557788 | 74.99988325 |
| 91.4471598  |         |             |             |             |
| RBM15B      | RBM15B  | 6224.66716  | 6662.278627 | 6680.346744 |
| 5726.289161 |         |             |             |             |
| GNL2        | GNL2    | 7143.022269 | 9607.493263 | 5721.419665 |
| 7052.744355 |         |             |             |             |
| COP58       | COP58   | 5408.221354 | 6203.23138  | 4641.064204 |
| 4846.699469 |         |             |             |             |
| CACNB2      | CACNB2  | 78.481878   | 45.70160643 | 45.5356434  |
| 68.8210584  |         |             |             |             |
| ANKFN1      | ANKFN1  | 0           | 1.015591254 | 1.785711506 |
| 0           |         |             |             | 0           |
| CEP120      | CEP120  | 2012.415917 | 1279.64498  | 2576.781703 |
| 3058.294705 |         |             |             |             |
| ODF3B       | ODF3B   | 354.925508  | 238.6639447 | 401.7850889 |
| 398.7850371 |         |             |             |             |
| NFATC4      | NFATC4  | 1.171371313 | 0           | 0           |
| 0           |         |             |             | 0           |
| NR5A1       | NR5A1   | 0           | 1.015591254 | 0           |
| 0           |         |             |             | 0           |
| MTOR        | MTOR    | 4078.714913 | 1552.839027 | 1600.890365 |
| 1647.934385 |         |             |             |             |
| ROR1        | ROR1    | 5.856856567 | 7.109138778 | 38.39279738 |
| 7.542033798 |         |             |             |             |
| ITGB3       | ITGB3   | 17.5705697  | 3.046773762 | 24.99996108 |
| 13.19855915 |         |             |             |             |
| SLC7A5      | SLC7A5  | 30794.18046 | 23352.5053  | 15008.01235 |
| 19143.56729 |         |             |             |             |
| CYFIP1      | CYFIP1  | 1928.077182 | 2150.006685 | 1352.676466 |
| 2080.658574 |         |             |             |             |
| RPS6KC1     | RPS6KC1 | 1049.548697 | 991.217064  | 1553.56901  |
| 1327.397948 |         |             |             |             |
| PITPNA      | PITPNA  | 5664.751672 | 7347.802723 | 6428.561422 |
| 5047.506119 |         |             |             |             |
| PIN4        | PIN4    | 1611.806927 | 988.1702902 | 997.3198761 |
| 1385.84871  |         |             |             |             |
| ZFPL1       | ZFPL1   | 1158.486229 | 1404.562704 | 1385.712129 |
| 1273.660958 |         |             |             |             |
| DDX20       | DDX20   | 2260.746635 | 2916.778082 | 3805.351219 |
| 3436.339149 |         |             |             |             |
| VILL        | VILL    | 568.115087  | 506.7800358 | 1124.105393 |
| 932.3839282 |         |             |             |             |
| GIPC1       | GIPC1   | 1067.119267 | 2126.648086 | 1255.355189 |
| 639.1873644 |         |             |             |             |
| BNIP1       | BNIP1   | 858.6151728 | 985.1235164 | 705.3560449 |
| 842.8222769 |         |             |             |             |
| ANKHD1      | ANKHD1  | 8445.58717  | 7910.440278 | 11017.83999 |
| 11296.08112 |         |             |             |             |

|                 |               |               |               |
|-----------------|---------------|---------------|---------------|
| KIAA0226        | KIAA0226      | 3948.692698   | 3398.168336   |
| 4516.064399     | 3807.784314   |               |               |
| CRYBB2 CRYBB2   | 0 20.31182508 | 5.357134518   | 0             |
| CD44 CD44       | 13881.92144   | 18333.45332   | 27590.13562   |
| 30581.06154     |               |               |               |
| HEXA HEXA       | 3618.365987   | 5237.404097   | 5515.169986   |
| 4483.739093     |               |               |               |
| HIST2H4A        | HIST2H4A      | 0 0           | 1.785711506   |
| 0.942754225     |               |               |               |
| HIST1H4L        | HIST1H4L      | 16.39919839   | 4.062365016   |
| 2.678567259     | 0.942754225   |               |               |
| HIST1H4E        | HIST1H4E      | 169.8488405   | 121.8709505   |
| 43.7499319      | 56.56525348   |               |               |
| PDE6A PDE6A     | 3.51411394    | 1.015591254   | 8.035701777   |
| 0.942754225     |               |               |               |
| LLGL1 LLGL1     | 672.3671339   | 496.6241232   | 392.8565313   |
| 814.5396502     |               |               |               |
| CD248 CD248     | 24.59879758   | 17.26505132   | 318.7495038   |
| 49.96597391     |               |               |               |
| PGLYRP4 PGLYRP4 | 77.31050669   | 109.6838554   | 0 16.96957604 |
| COX16 COX16     | 3304.438475   | 3281.375342   | 2616.960212   |
| 2460.588527     |               |               |               |
| GNA01 GNA01     | 11.71371313   | 6.093547524   | 2.678567259   |
| 14.14131337     |               |               |               |
| AP1M1 AP1M1     | 10318.6099    | 13893.28836   | 8930.343242   |
| 7601.427314     |               |               |               |
| JAGN1 JAGN1     | 2796.063325   | 3297.624802   | 3134.816549   |
| 2684.964032     |               |               |               |
| PARD6A PARD6A   | 714.5365012   | 1077.542321   | 603.570489    |
| 802.2838452     |               |               |               |
| HMMR HMMR       | 5357.852388   | 4787.497172   | 1605.354644   |
| 3767.245882     |               |               |               |
| METTL13 METTL13 | 4435.983164   | 6670.403357   | 4678.564146   |
| 4843.871207     |               |               |               |
| RWDD2B RWDD2B   | 1028.464013   | 857.1590184   | 661.606113    |
| 653.3286777     |               |               |               |
| SVOP SVOP       | 0 0           | 8.92855753    | 0             |
| 6-Sep 6-Sep     | 13210.72567   | 19849.73106   | 12824.98004   |
| 11063.22083     |               |               |               |
| HNRNPA1 HNRNPA1 | 28387.01241   | 34802.28109   | 34572.26761   |
| 35654.02202     |               |               |               |
| HIGD2A HIGD2A   | 3080.706554   | 3744.484954   | 2257.139344   |
| 2221.128953     |               |               |               |
| MTCL1 MTCL1     | 0 0           | 0 0.942754225 |               |
| SMYD4 SMYD4     | 1810.940051   | 1818.923936   | 2380.353438   |
| 1935.474423     |               |               |               |
| PWWP2A PWWP2A   | 1262.738276   | 1187.226176   | 1586.604673   |
| 1591.369131     |               |               |               |
| SSH2 SSH2       | 2333.371656   | 932.3127712   | 2005.354021   |
| 2166.449208     |               |               |               |

|             |           |             |             |             |
|-------------|-----------|-------------|-------------|-------------|
| SCFD2       | SCFD2     | 1571.980303 | 2132.741634 | 1261.605179 |
| 1711.098918 |           |             |             |             |
| ZFH2        | ZFH2      | 10.54234182 | 19.29623383 | 26.78567259 |
| 27.33987252 |           |             |             |             |
| FGD5        | FGD5      | 1.171371313 | 2.031182508 | 4.464278765 |
| 5.656525348 |           |             |             |             |
| TK1         | TK1       | 17548.31365 | 23633.82407 | 5712.491108 |
| 9149.429751 |           |             |             |             |
| DCAF17      | DCAF17    | 1352.933867 | 1104.963284 | 1285.712284 |
| 1392.44799  |           |             |             |             |
| SLC16A7     | SLC16A7   | 872.6716285 | 444.8289693 | 924.9985601 |
| 1083.224604 |           |             |             |             |
| DEDD2       | DEDD2     | 2662.526995 | 4546.802044 | 5723.205377 |
| 4023.675031 |           |             |             |             |
| IQGAP2      | IQGAP2    | 9960.170278 | 6871.490425 | 3624.994357 |
| 6001.573395 |           |             |             |             |
| GAS5        | GAS5      | 1783.99851  | 1824.001892 | 5302.670317 |
| 3414.655802 |           |             |             |             |
| FASTKD3     | FASTKD3   | 1748.857371 | 1364.954645 | 870.5343592 |
| 1345.310279 |           |             |             |             |
| DBI         | DBI       | 9575.960488 | 12228.73429 | 6466.954219 |
| 6685.070207 |           |             |             |             |
| CEP76       | CEP76     | 1180.742284 | 1266.442294 | 1169.641036 |
| 948.4107501 |           |             |             |             |
| LRFN2       | LRFN2     | 0           | 2.031182508 | 24.10710533 |
| 22.62610139 |           |             |             |             |
| VPS18       | VPS18     | 3337.236872 | 4150.721455 | 3480.351725 |
| 3143.142585 |           |             |             |             |
| NRSN2-AS1   | NRSN2-AS1 |             | 29.28428284 | 47.73278894 |
| 73.21417175 |           |             |             |             |
| FCGR3B      | FCGR3B    | 1.171371313 | 0           | 0.942754225 |
| ANKRD18B    | ANKRD18B  |             | 29.28428284 | 7.109138778 |
| 3.571423012 |           |             |             |             |
| ZNF557      | ZNF557    | 1013.236186 | 998.3262027 | 2119.639558 |
| 1289.687779 |           |             |             |             |
| FAM160B1    | FAM160B1  |             | 5843.971483 | 4827.105231 |
| 2599.103097 |           |             |             |             |
| ARHGEF2     | ARHGEF2   | 2769.121785 | 1076.526729 | 904.4628778 |
| 1117.163756 |           |             |             |             |
| VIT         | VIT       | 0           | 0           | 19.64282657 |
|             |           |             |             | 0           |
| FIBP        | FIBP      | 5012.29785  | 6930.394718 | 4023.208023 |
| 3827.582152 |           |             |             |             |
| RAB6A       | RAB6A     | 7862.244256 | 8881.345517 | 10933.0187  |
| 9044.784032 |           |             |             |             |
| POLR2C      | POLR2C    | 4543.749325 | 3715.032807 | 2964.2811   |
| 3393.915209 |           |             |             |             |
| HAGLR       | HAGLR     | 9.370970508 | 3.046773762 | 20.53568232 |
| 5.656525348 |           |             |             |             |
| TRPV1       | TRPV1     | 267.0726595 | 186.8687907 | 173.2140161 |
| 146.1269048 |           |             |             |             |
| STK19       | STK19     | 0           | 32.49892013 | 39.28565313 |
|             |           |             |             | 1.885508449 |

|             |          |             |             |             |
|-------------|----------|-------------|-------------|-------------|
| TIRAP       | TIRAP    | 711.0223873 | 642.8692638 | 633.0347289 |
| 549.625713  |          |             |             |             |
| DIS3L2      | DIS3L2   | 1243.996335 | 1388.313244 | 1136.605374 |
| 1296.287059 |          |             |             |             |
| TMEM107     | TMEM107  | 912.4982532 | 667.2434539 | 655.3561227 |
| 761.7454136 |          |             |             |             |
| NAV2        | NAV2     | 28.11291152 | 14.21827756 | 0.892855753 |
| 43.36669434 |          |             |             |             |
| CD320       | CD320    | 3047.908158 | 4764.138573 | 2354.460621 |
| 2729.273481 |          |             |             |             |
| BCCIP       | BCCIP    | 6135.64294  | 7604.74731  | 5160.706253 |
| 5860.160261 |          |             |             |             |
| WBP11       | WBP11    | 10917.18064 | 12566.92618 | 11682.12467 |
| 11642.07192 |          |             |             |             |
| RSL24D1     | RSL24D1  | 4270.819809 | 3777.999465 | 5684.81258  |
| 5789.453694 |          |             |             |             |
| LRRC42      | LRRC42   | 1601.264586 | 1771.191147 | 1416.96208  |
| 1452.78426  |          |             |             |             |
| COL6A2      | COL6A2   | 1036.663612 | 2088.055618 | 966.0699248 |
| 817.3679128 |          |             |             |             |
| ZNF398      | ZNF398   | 1568.466189 | 1274.567024 | 2281.246449 |
| 2558.634966 |          |             |             |             |
| SLC44A1     | SLC44A1  | 634.8832519 | 998.3262027 | 2226.782248 |
| 1942.073703 |          |             |             |             |
| TSSK3       | TSSK3    | 0           | 3.046773762 | 45.5356434  |
| 12.25580492 |          |             |             | 12.25580492 |
| PANX2       | PANX2    | 71.45365012 | 24.3741901  | 1.785711506 |
| 12.25580492 |          |             |             |             |
| NUDT2       | NUDT2    | 1022.607157 | 1353.783142 | 883.9271955 |
| 750.4323629 |          |             |             |             |
| ATP1A3      | ATP1A3   | 80.82462063 | 18.28064257 | 33.03566286 |
| 44.30944856 |          |             |             |             |
| SERPINC1    | SERPINC1 |             | 3.51411394  | 6.093547524 |
| 17.85711506 | 0        |             |             |             |
| ARSA        | ARSA     | 1427.901631 | 644.9004463 | 614.2847581 |
| 1043.628927 |          |             |             |             |
| LY75        | LY75     | 3386.434467 | 2529.837814 | 4488.38587  |
| 4610.068159 |          |             |             |             |
| RAB9B       | RAB9B    | 39.82662466 | 15.23386881 | 58.03562395 |
| 26.39711829 |          |             |             |             |
| ISYNA1      | ISYNA1   | 1055.405553 | 1275.582615 | 952.6770885 |
| 1264.233415 |          |             |             |             |
| GP6         | GP6      | 19.91331233 | 6.093547524 | 12.49998054 |
| 14.14131337 |          |             |             |             |
| SMURF1      | SMURF1   | 937.0970508 | 822.6289158 | 1154.462489 |
| 813.5968959 |          |             |             |             |
| PEX11A      | PEX11A   | 76.13913537 | 119.839768  | 377.6779835 |
| 317.7081737 |          |             |             |             |
| BASP1       | BASP1    | 94.88107639 | 25.38978135 | 66.07132572 |
| 126.3290661 |          |             |             |             |
| CYB5D1      | CYB5D1   | 398.2662466 | 376.7843553 | 616.9633253 |



|             |          |             |             |             |   |   |
|-------------|----------|-------------|-------------|-------------|---|---|
| 664.6417284 |          |             |             |             |   |   |
| SNX4        | SNX4     | 4023.660462 | 4468.601518 | 2752.674287 |   |   |
| 3204.42161  |          |             |             |             |   |   |
| IFIT2       | IFIT2    | 575.1433149 | 427.563918  | 24506.21185 |   |   |
| 12110.62077 |          |             |             |             |   |   |
| IL7         | IL7      | 90.19559114 | 129.9956805 | 24.99996108 |   |   |
| 80.1341091  |          |             |             |             |   |   |
| HYPK        | HYPK     | 2290.030918 | 2859.904971 | 2689.281528 |   |   |
| 2591.631364 |          |             |             |             |   |   |
| PCYT1B      | PCYT1B   | 1.171371313 | 0           | 0           | 0 |   |
| MINPP1      | MINPP1   | 1567.294817 | 1845.329309 | 1349.105043 |   |   |
| 1639.449597 |          |             |             |             |   |   |
| ALAS2       | ALAS2    | 2.342742627 | 1.015591254 | 13.3928363  |   | 0 |
| RASGRP2     | RASGRP2  | 6386.316401 | 5793.948104 | 885.712907  |   |   |
| 848.4788022 |          |             |             |             |   |   |
| HES6        | HES6     | 245.9879758 | 273.1940473 | 203.5711117 |   |   |
| 197.035633  |          |             |             |             |   |   |
| LONP1       | LONP1    | 6898.205665 | 8265.897217 | 7665.16664  |   |   |
| 7890.852861 |          |             |             |             |   |   |
| TMEM214     | TMEM214  | 4134.940737 | 4471.648292 | 3243.744951 |   |   |
| 3472.16381  |          |             |             |             |   |   |
| TRABD2A     | TRABD2A  | 1656.319037 | 3124.974289 | 3058.030954 |   |   |
| 2333.316706 |          |             |             |             |   |   |
| OCIAD1      | OCIAD1   | 5696.378697 | 5297.323981 | 5325.884567 |   |   |
| 5872.416066 |          |             |             |             |   |   |
| ZMYM1       | ZMYM1    | 384.2097908 | 263.0381348 | 540.1777306 |   |   |
| 737.2338037 |          |             |             |             |   |   |
| MGC16025    | MGC16025 |             | 1.171371313 | 0           | 0 | 0 |
| SREK1       | SREK1    | 3023.30936  | 2864.982928 | 3096.423752 |   |   |
| 3268.528897 |          |             |             |             |   |   |
| TTLL6       | TTLL6    | 0           | 0           | 16.07140355 | 0 |   |
| MFAP5       | MFAP5    | 0           | 1.015591254 | 0           | 0 |   |
| MED18       | MED18    | 1895.278785 | 1080.589094 | 1161.605335 |   |   |
| 842.8222769 |          |             |             |             |   |   |
| NUGGC       | NUGGC    | 90.19559114 | 13.2026863  | 58.03562395 |   |   |
| 98.9891936  |          |             |             |             |   |   |
| FECH        | FECH     | 2976.454508 | 3451.994673 | 1999.104031 |   |   |
| 2448.332722 |          |             |             |             |   |   |
| ZNF763      | ZNF763   | 40.99799597 | 23.35859884 | 575.8919607 |   |   |
| 302.6241061 |          |             |             |             |   |   |
| GPRASP2     | GPRASP2  | 45.68348122 | 63.98224901 | 149.9997665 |   |   |
| 191.3791076 |          |             |             |             |   |   |
| KDM2A       | KDM2A    | 3565.654278 | 1277.613798 | 1770.532958 |   |   |
| 1825.172179 |          |             |             |             |   |   |
| XPC         | XPC      | 5057.981332 | 6365.72598  | 10733.01901 |   |   |
| 6924.529781 |          |             |             |             |   |   |
| TBCC        | TBCC     | 2897.97263  | 3088.413004 | 4467.850188 |   |   |
| 4472.426042 |          |             |             |             |   |   |
| FLT4        | FLT4     | 62.08267961 | 121.8709505 | 64.28561422 |   |   |
| 160.2682182 |          |             |             |             |   |   |

|                 |               |             |             |
|-----------------|---------------|-------------|-------------|
| CACNA1H CACNA1H | 26.94154021   | 36.56128515 | 54.46420093 |
| 40.53843166     |               |             |             |
| HECTD2 HECTD2   | 292.8428284   | 209.2117983 | 352.6780224 |
| 263.0284287     |               |             |             |
| GOLGA6L9        | GOLGA6L9      | 4.685485254 | 3.046773762 |
| 15.1785478      | 6.599279573   |             |             |
| LOC101929378    | LOC101929378  | 4.685485254 | 0 0         |
| 2.828262674     |               |             |             |
| TCEA2 TCEA2     | 549.373146    | 753.5687105 | 623.2133156 |
| 520.400332      |               |             |             |
| ADAM22 ADAM22   | 48.02622385   | 48.74838019 | 88.39271955 |
| 65.05004151     |               |             |             |
| DCAF4L1 DCAF4L1 | 1.171371313   | 2.031182508 | 2.678567259 |
| 23.56885562     |               |             |             |
| CELF2 CELF2     | 13276.32247   | 14068.98564 | 9197.307112 |
| 10917.09392     |               |             |             |
| AMPD3 AMPD3     | 1263.909647   | 1227.849826 | 1178.569594 |
| 1785.576502     |               |             |             |
| WDR31 WDR31     | 45.68348122   | 49.76397145 | 89.2855753  |
| 87.6761429      |               |             |             |
| BROX BROX       | 3730.817633   | 1708.224489 | 1617.854624 |
| 2309.747851     |               |             |             |
| AGAP2 AGAP2     | 1146.772516   | 912.0009461 | 312.4995136 |
| 584.5076193     |               |             |             |
| PSMD2 PSMD2     | 32887.421     | 46261.19721 | 27151.74345 |
| 27049.50422     |               |             |             |
| SNORA19 SNORA19 | 8.199599194   | 12.18709505 | 7.142846024 |
| 2.828262674     |               |             |             |
| LIPA LIPA       | 2404.825307   | 2314.532468 | 4828.563912 |
| 4180.172232     |               |             |             |
| ACSF2 ACSF2     | 240.1311193   | 250.8510398 | 257.1424569 |
| 255.4863949     |               |             |             |
| SNORA71A        | SNORA71A      | 23.42742627 | 8.124730032 |
| 3.571423012     | 11.3130507    |             |             |
| CYCSP52 CYCSP52 | 0 1.015591254 | 0           | 0.942754225 |
| LOC101929524    | LOC101929524  | 84.33873457 | 74.13816155 |
| 164.2854586     | 121.615295    |             |             |
| SCARNA22        | SCARNA22      | 100.737933  | 83.27848283 |
| 21.42853807     | 23.56885562   |             |             |
| SCARNA7 SCARNA7 | 2.342742627   | 1.015591254 | 0.892855753 |
| 4.713771124     |               |             |             |
| SNORD20 SNORD20 | 23.42742627   | 27.42096386 | 30.3570956  |
| 35.82466054     |               |             |             |
| SCARNA4 SCARNA4 | 5.856856567   | 4.062365016 | 6.249990271 |
| 2.828262674     |               |             |             |
| SCARNA8 SCARNA8 | 3.51411394    | 2.031182508 | 0.892855753 |
| 6.599279573     |               |             |             |
| SCARNA15        | SCARNA15      | 9.370970508 | 10.15591254 |
| 25.89281684     | 16.02682182   |             |             |
| SNORA71B        | SNORA71B      | 24.59879758 | 11.17150379 |

|                     |               |             |             |             |
|---------------------|---------------|-------------|-------------|-------------|
| 16.07140355         | 18.85508449   |             |             |             |
| SIRPD SIRPD         | 2.342742627   | 0           | 4.464278765 | 3.771016899 |
| ZNF831 ZNF831       | 1094.060807   | 371.706399  |             | 253.5710339 |
| 571.3090602         |               |             |             |             |
| RPIA RPIA           | 3920.579786   | 3803.389246 |             | 3462.49461  |
| 2938.564918         |               |             |             |             |
| GMCL1 GMCL1         | 3345.436471   | 3907.995146 |             | 3715.172788 |
| 3228.93322          |               |             |             |             |
| RRAGA RRAGA         | 4238.021412   | 5256.700331 |             | 5274.098933 |
| 4900.43646          |               |             |             |             |
| STC2 STC2           | 17.5705697    | 7.109138778 |             | 4.464278765 |
| 15.0840676          |               |             |             |             |
| ALDH1B1 ALDH1B1     | 1741.829143   | 2529.837814 |             | 1614.283201 |
| 1670.560486         |               |             |             |             |
| CYP4F2 CYP4F2       | 0 1.015591254 | 0           | 0           |             |
| SLC6A2 SLC6A2       | 0 0           | 0           | 0.942754225 |             |
| NUP155 NUP155       | 6494.082562   | 5650.749738 |             | 5146.42056  |
| 3617.34796          |               |             |             |             |
| ARHGAP1 ARHGAP1     | 8478.385567   | 8726.975646 |             | 4472.314467 |
| 4857.069766         |               |             |             |             |
| NPIP9 NPIP9         | 2.342742627   | 1.015591254 |             | 11.60712479 |
| 5.656525348         |               |             |             |             |
| DBNDD1 DBNDD1       | 0 0           | 200.8925444 |             | 48.08046546 |
| C16orf13 C16orf13   |               | 2049.899799 |             | 2397.810951 |
| 1769.640103         | 1948.672982   |             |             |             |
| IL1R1 IL1R1         | 670.0243913   | 1250.192834 |             | 825.8915716 |
| 1192.584094         |               |             |             |             |
| CSF1R CSF1R         | 10.54234182   | 5.07795627  |             | 11.60712479 |
| 24.51160984         |               |             |             |             |
| LINC00261 LINC00261 |               | 0 0         |             | 0.892855753 |
| 2.828262674         |               |             |             |             |
| BTBD1 BTBD1         | 8925.849409   | 9625.773906 |             | 5484.812891 |
| 6774.631859         |               |             |             |             |
| ING4 ING4           | 1308.421757   | 1264.411111 |             | 1774.997237 |
| 1803.488832         |               |             |             |             |
| ASTN2 ASTN2         | 371.3247064   | 365.6128515 |             | 353.5708782 |
| 249.8298695         |               |             |             |             |
| ARF6 ARF6           | 23712.0695    | 23160.55855 |             | 17276.75882 |
| 21041.33154         |               |             |             |             |
| DENR DENR           | 8705.631602   | 8773.692844 |             | 5454.455795 |
| 7096.111049         |               |             |             |             |
| ZSWIM8 ZSWIM8       | 3585.567591   | 1412.687434 |             | 1945.532686 |
| 1947.730228         |               |             |             |             |
| CCT2 CCT2           | 14385.6111    | 17091.38521 |             | 11521.41064 |
| 12430.21445         |               |             |             |             |
| ZNF669 ZNF669       | 441.6069852   | 501.7020795 |             | 716.0703139 |
| 643.9011355         |               |             |             |             |
| BBX BBX             | 2008.901803   | 1800.643293 |             | 5352.670239 |
| 4968.314764         |               |             |             |             |
| PRR5 PRR5           | 978.0950467   | 801.3014994 |             | 1368.747869 |

|             |            |             |             |             |             |
|-------------|------------|-------------|-------------|-------------|-------------|
| 1225.580492 |            |             |             |             |             |
| MIR3124     | MIR3124    | 4.685485254 | 0           | 0.892855753 | 0           |
| MIR3122     | MIR3122    | 1.171371313 | 0           | 1.785711506 | 0           |
| MIR3121     | MIR3121    | 0           | 0           | 1.885508449 |             |
| PBX4        | PBX4       | 503.6896648 | 486.4682107 | 590.1776528 |             |
| 639.1873644 |            |             |             |             |             |
| MROH7-TTC4  | MROH7-TTC4 |             | 2765.607671 | 3628.707551 |             |
| 2616.067356 |            | 2864.087335 |             |             |             |
| DPY19L1P1   | DPY19L1P1  |             | 45.68348122 | 11.17150379 |             |
| 44.64278765 |            | 65.05004151 |             |             |             |
| LOC284080   | LOC284080  |             | 0           | 1.015591254 | 1.785711506 |
| 0           |            |             |             |             |             |
| MT1JP       | MT1JP      | 0           | 1.015591254 | 0           | 0           |
| ENOSF1      | ENOSF1     | 16099.32733 | 15984.39075 | 6905.346394 |             |
| 9673.6011   |            |             |             |             |             |
| BCL2L15     | BCL2L15    | 145.2500429 | 233.5859884 | 0           | 19.79783872 |
| EXTL2       | EXTL2      | 240.1311193 | 297.5682374 | 499.9992217 |             |
| 253.6008864 |            |             |             |             |             |
| SIRPA       | SIRPA      | 0           | 0           | 58.9284797  | 2.828262674 |
| ZNF174      | ZNF174     | 680.5667331 | 1033.871897 | 1107.141134 |             |
| 908.8150726 |            |             |             |             |             |
| TMPO        | TMPO       | 21429.06681 | 19487.16498 | 10495.51938 |             |
| 15685.54479 |            |             |             |             |             |
| ZNF492      | ZNF492     | 81.99599194 | 26.40537261 | 33.03566286 |             |
| 50.90872813 |            |             |             |             |             |
| FGF20       | FGF20      | 2.342742627 | 0           | 0           | 0           |
| NGEF        | NGEF       | 0           | 0           | 2.828262674 |             |
| IRS4        | IRS4       | 0           | 6.093547524 | 0           | 1.885508449 |
| CUL1        | CUL1       | 8674.004576 | 9929.435691 | 9908.020291 |             |
| 8779.870095 |            |             |             |             |             |
| ARPC2       | ARPC2      | 69970.69404 | 90971.58658 | 37641.01284 |             |
| 45395.50143 |            |             |             |             |             |
| CLDN10      | CLDN10     | 9.370970508 | 0           | 0           | 1.885508449 |
| DERL1       | DERL1      | 7132.479928 | 7918.565008 | 9691.056343 |             |
| 7958.731165 |            |             |             |             |             |
| SAMD8       | SAMD8      | 898.4417974 | 836.8471933 | 1298.212265 |             |
| 1262.347907 |            |             |             |             |             |
| SYTL1       | SYTL1      | 2045.214313 | 2109.383035 | 1199.105276 |             |
| 1404.703795 |            |             |             |             |             |
| DDIT4L      | DDIT4L     | 31.62702546 | 0           | 0           | 36.76741476 |
| RMND5A      | RMND5A     | 3508.257084 | 2936.074315 | 3756.244153 |             |
| 2886.713436 |            |             |             |             |             |
| EX05        | EX05       | 1046.034583 | 831.7692371 | 866.9629362 |             |
| 987.0636733 |            |             |             |             |             |
| EPS8L2      | EPS8L2     | 262.3871742 | 335.1451138 | 191.9639869 |             |
| 295.0820723 |            |             |             |             |             |
| NDUFB11     | NDUFB11    | 5190.34629  | 5738.090585 | 3733.922759 |             |
| 3782.32995  |            |             |             |             |             |
| UBB         | UBB        | 40600.9011  | 49258.207   | 43691.00342 |             |
| 36523.24142 |            |             |             |             |             |

|             |         |             |             |             |             |
|-------------|---------|-------------|-------------|-------------|-------------|
| EXOC6       | EXOC6   | 1480.61334  | 1133.39984  | 788.3916299 |             |
| 1070.968799 |         |             |             |             |             |
| DICER1      | DICER1  | 4184.138332 | 2304.376555 | 1935.711273 |             |
| 2899.911995 |         |             |             |             |             |
| PLSCR1      | PLSCR1  | 6890.006066 | 6143.311496 | 4703.564107 |             |
| 3939.769905 |         |             |             |             |             |
| FAM117A     | FAM117A | 2577.01689  | 1130.353066 | 1777.675804 |             |
| 1622.480021 |         |             |             |             |             |
| GDPD5       | GDPD5   | 558.7441165 | 714.9762429 | 791.9630529 |             |
| 791.9135488 |         |             |             |             |             |
| ADAM8       | ADAM8   | 11406.81385 | 11842.80961 | 2380.353438 |             |
| 3696.539315 |         |             |             |             |             |
| ZFP1        | ZFP1    | 1361.133466 | 1118.165971 | 1590.176096 |             |
| 1500.864726 |         |             |             |             |             |
| PTPN7       | PTPN7   | 38522.88839 | 63557.73186 | 23563.35618 |             |
| 29551.57393 |         |             |             |             |             |
| CTDSPL2     | CTDSPL2 | 4373.900484 | 3464.181768 | 3428.566092 |             |
| 3830.410415 |         |             |             |             |             |
| TRMT112     | TRMT112 | 7816.560775 | 8590.886418 | 11472.30357 |             |
| 9175.826869 |         |             |             |             |             |
| IFT57       | IFT57   | 1165.514457 | 1301.987988 | 2048.211097 |             |
| 1632.850317 |         |             |             |             |             |
| TTC32       | TTC32   | 723.9074717 | 374.7531727 | 537.4991633 |             |
| 805.1121079 |         |             |             |             |             |
| BTN2A1      | BTN2A1  | 1487.641568 | 1797.59652  | 2350.889198 |             |
| 1802.546078 |         |             |             |             |             |
| COMMD3      | COMMD3  | 6278.55024  | 6501.815208 | 3526.780224 |             |
| 4615.724684 |         |             |             |             |             |
| CD302       | CD302   | 57.39719436 | 44.68601518 | 114.2855364 |             |
| 168.7530062 |         |             |             |             |             |
| ZC3H4       | ZC3H4   | 418.1795589 | 296.5526462 | 252.6781781 |             |
| 322.4219449 |         |             |             |             |             |
| MLC1        | MLC1    | 66.76816487 | 88.3564391  | 8.035701777 | 0           |
| PLEKHM2     | PLEKHM2 | 2697.668135 | 3330.123722 | 2967.852523 |             |
| 2909.339537 |         |             |             |             |             |
| CXorf58     | CXorf58 | 0           | 4.062365016 | 1.785711506 | 6.599279573 |
| IL1RL2      | IL1RL2  | 0           | 5.07795627  | 0           | 0           |
| KDSR        | KDSR    | 3634.765186 | 2609.053932 | 5587.491302 |             |
| 6213.693095 |         |             |             |             |             |
| IKZF1       | IKZF1   | 29741.11765 | 19269.82845 | 20607.11078 |             |
| 24191.07341 |         |             |             |             |             |
| PABPC1      | PABPC1  | 15091.948   | 9924.357735 | 10229.44836 |             |
| 12139.84615 |         |             |             |             |             |
| PEBP1       | PEBP1   | 12696.49367 | 17524.02709 | 13136.58669 |             |
| 12644.21966 |         |             |             |             |             |
| UCKL1       | UCKL1   | 2165.865559 | 2276.955592 | 2134.818105 |             |
| 2323.889164 |         |             |             |             |             |
| PDE6G       | PDE6G   | 172.1915831 | 550.4504597 | 121.4283824 |             |
| 60.33627038 |         |             |             |             |             |
| CYLD        | CYLD    | 23769.46669 | 23437.81496 | 21495.50225 |             |

|                 |               |               |             |  |
|-----------------|---------------|---------------|-------------|--|
| 23304.88443     |               |               |             |  |
| DISC2 DISC2     | 11.71371313   | 4.062365016   | 14.28569205 |  |
| 25.45436407     |               |               |             |  |
| PSMB2 PSMB2     | 18056.6888    | 18644.22424   | 10347.30532 |  |
| 11269.684       |               |               |             |  |
| AIF1 AIF1       | 49.19759517   | 31.48332888   | 24.10710533 |  |
| 30.16813519     |               |               |             |  |
| MSX1 MSX1       | 4.685485254   | 0 0           | 0           |  |
| TRAPPC11        | TRAPPC11      | 3680.448667   | 3408.324249 |  |
| 3483.923148     | 3038.496866   |               |             |  |
| CD99L2 CD99L2   | 1397.445977   | 1502.059465   | 1041.962664 |  |
| 1172.786256     |               |               |             |  |
| SERF1B SERF1B   | 30.45565415   | 32.49892013   | 53.57134518 |  |
| 32.05364364     |               |               |             |  |
| SH3BP4 SH3BP4   | 2.342742627   | 0 17.85711506 | 0           |  |
| MYBBP1A MYBBP1A | 5012.29785    | 5452.709443   | 5159.813397 |  |
| 4979.627815     |               |               |             |  |
| S100A14 S100A14 | 0 1.015591254 | 0             | 0           |  |
| TMEM27 TMEM27   | 10.54234182   | 8.124730032   | 115.1783921 |  |
| 17.91233027     |               |               |             |  |
| MRS2 MRS2       | 1950.333237   | 2565.383508   | 2651.781587 |  |
| 2351.229036     |               |               |             |  |
| ADGB ADGB       | 0 1.015591254 | 8.035701777   | 0           |  |
| CNOT2 CNOT2     | 4028.345947   | 4655.470309   | 5160.706253 |  |
| 4641.179048     |               |               |             |  |
| GOLIM4 GOLIM4   | 372.4960777   | 234.6015797   | 75.89273901 |  |
| 119.7297865     |               |               |             |  |
| RFWD3 RFWD3     | 8288.623414   | 6544.470041   | 4780.349702 |  |
| 5685.750729     |               |               |             |  |
| RPS6KA6 RPS6KA6 | 0 7.109138778 | 27.67852834   | 17.91233027 |  |
| VPS13C VPS13C   | 3160.359804   | 2170.31851    | 3248.20923  |  |
| 4067.041725     |               |               |             |  |
| OGT OGT         | 7611.570795   | 4560.004731   | 5980.347834 |  |
| 7447.758375     |               |               |             |  |
| MRPL49 MRPL49   | 6879.463724   | 9904.045909   | 9809.806159 |  |
| 7082.91249      |               |               |             |  |
| PDGFC PDGFC     | 0 0           | 4.464278765   | 0           |  |
| APOPT1 APOPT1   | 1267.423761   | 1402.531522   | 1172.319604 |  |
| 1293.458796     |               |               |             |  |
| ALG1 ALG1       | 3072.506955   | 4707.265463   | 2996.423907 |  |
| 3292.097753     |               |               |             |  |
| FBXW5 FBXW5     | 10838.69876   | 13814.07224   | 8458.915404 |  |
| 9254.07547      |               |               |             |  |
| DPCR1 DPCR1     | 0 1.015591254 | 3.571423012   | 0           |  |
| IL12RB1 IL12RB1 | 3708.561578   | 3643.94142    | 1910.711311 |  |
| 2331.431198     |               |               |             |  |
| STRC STRC       | 1.171371313   | 0 0           | 0           |  |
| HYAL1 HYAL1     | 14.05645576   | 11.17150379   | 49.99992217 |  |
| 24.51160984     |               |               |             |  |
| UBA1 UBA1       | 21693.79673   | 32715.24107   | 13849.97844 |  |

|              |              |             |             |             |             |
|--------------|--------------|-------------|-------------|-------------|-------------|
| 14260.1004   |              |             |             |             |             |
| TPM3         | TPM3         | 60846.88288 | 78785.50712 | 38405.29736 |             |
| 47655.28331  |              |             |             |             |             |
| PDS5A        | PDS5A        | 15753.77279 | 10624.10011 | 8741.057822 |             |
| 9470.908941  |              |             |             |             |             |
| IP07         | IP07         | 1064.776524 | 596.1520661 | 555.3562784 |             |
| 1213.324687  |              |             |             |             |             |
| TEAD2        | TEAD2        | 12.88508445 | 13.2026863  | 11.60712479 |             |
| 10.37029647  |              |             |             |             |             |
| GBP6         | GBP6         | 32.79839678 | 41.63924142 | 874.1057822 |             |
| 866.3911325  |              |             |             |             |             |
| LPAR2        | LPAR2        | 1256.881419 | 1533.542794 | 1087.498307 |             |
| 1440.528455  |              |             |             |             |             |
| MSN          | MSN          | 83097.08098 | 98609.8484  | 49563.31571 |             |
| 59371.83281  |              |             |             |             |             |
| C2CD5        | C2CD5        | 3614.851873 | 2622.256618 | 2736.602883 |             |
| 3325.094151  |              |             |             |             |             |
| PRDM16       | PRDM16       | 0           | 2.678567259 | 0           |             |
| WDR88        | WDR88        | 38.65525334 | 20.31182508 | 24.10710533 |             |
| 23.56885562  |              |             |             |             |             |
| LOC730668    | LOC730668    | 0           | 0           | 0           | 2.828262674 |
| CACNB1       | CACNB1       | 276.44363   | 258.9757698 | 415.1779252 |             |
| 344.105292   |              |             |             |             |             |
| NF1          | NF1          | 428.7219007 | 242.7263097 | 933.0342619 |             |
| 632.5880848  |              |             |             |             |             |
| LGALS9B      | LGALS9B      | 2.342742627 | 2.031182508 | 0           | 1.885508449 |
| CPS1         | CPS1         | 5.856856567 | 5.07795627  | 2.678567259 |             |
| 58.45076193  |              |             |             |             |             |
| ADAMTSL1     | ADAMTSL1     | 0           | 1.015591254 | 16.96425931 |             |
| 0            |              |             |             |             |             |
| PRKCQ        | PRKCQ        | 8234.740334 | 7348.818314 | 5523.205688 |             |
| 5949.721912  |              |             |             |             |             |
| LTBP3        | LTBP3        | 959.3531057 | 823.644507  | 1349.105043 |             |
| 1302.886339  |              |             |             |             |             |
| KIAA0141     | KIAA0141     | 2040.528828 | 2634.443713 |             |             |
| 1504.461944  | 1777.091714  |             |             |             |             |
| MIR181B1     | MIR181B1     | 0           | 1.015591254 | 0           |             |
| 1.885508449  |              |             |             |             |             |
| MIR34A       | MIR34A       | 4.685485254 | 6.093547524 | 1.785711506 | 0           |
| LOC100506124 | LOC100506124 | 5.856856567 | 6.093547524 |             |             |
| 20.53568232  | 23.56885562  |             |             |             |             |
| LINC00881    | LINC00881    | 21.08468364 | 15.23386881 |             | 0           |
| 41.48118589  |              |             |             |             |             |
| LOC100288069 | LOC100288069 | 120.6512453 | 75.1537528  |             |             |
| 153.5711895  | 146.1269048  |             |             |             |             |
| PAXIP1       | PAXIP1       | 1199.484225 | 893.7203036 | 1422.319215 |             |
| 1174.671764  |              |             |             |             |             |
| RRM2B        | RRM2B        | 3208.386028 | 2923.88722  | 2925.888303 |             |
| 2622.742253  |              |             |             |             |             |
| GLTSCR2      | GLTSCR2      | 3251.726766 | 3575.896806 | 7420.524163 |             |

|             |             |             |             |             |
|-------------|-------------|-------------|-------------|-------------|
| 5148.380821 |             |             |             |             |
| NMT1        | NMT1        | 7092.653303 | 8393.861715 | 6902.667827 |
| 6330.594619 |             |             |             |             |
| ESD         | ESD         | 3972.120124 | 4821.011683 | 4949.099439 |
| 4816.531334 |             |             |             |             |
| KRIT1       | KRIT1       | 1880.050958 | 1311.128309 | 1682.140239 |
| 2195.674589 |             |             |             |             |
| PKP3        | PKP3        | 4.685485254 | 0           | 6.249990271 |
| POLI        | POLI        | 502.5182935 | 343.2698439 | 913.3914353 |
| 937.0976994 |             |             |             |             |
| SORBS3      | SORBS3      | 159.3064986 | 281.3187774 | 959.8199345 |
| 850.3643107 |             |             |             |             |
| DNAJC8      | DNAJC8      | 9974.226734 | 11941.32197 | 9710.69917  |
| 10112.92457 |             |             |             |             |
| LPPR2       | LPPR2       | 45.68348122 | 36.56128515 | 135.7140745 |
| 180.0660569 |             |             |             |             |
| KDM3B       | KDM3B       | 2717.581447 | 1279.64498  | 1997.31832  |
| 1847.79828  |             |             |             |             |
| QPCTL       | QPCTL       | 158.1351273 | 123.902133  | 209.821102  |
| 149.8979217 |             |             |             |             |
| DUT         | DUT         | 14387.95384 | 14815.44521 | 7886.594867 |
| 10874.66998 |             |             |             |             |
| FAM107B     | FAM107B     | 42533.66376 | 42807.17136 | 16828.54523 |
| 22710.00652 |             |             |             |             |
| ATP5G1      | ATP5G1      | 5206.745488 | 7562.092478 | 5150.884839 |
| 4899.493706 |             |             |             |             |
| IL19        | IL19        | 9.370970508 | 41.63924142 | 2.678567259 |
| 7.542033798 |             |             |             |             |
| ANAPC2      | ANAPC2      | 449.8065844 | 173.6661044 | 273.2138604 |
| 286.5972843 |             |             |             |             |
| CDV3        | CDV3        | 11013.23309 | 6800.399037 | 6505.347017 |
| 7081.026982 |             |             |             |             |
| SGSH        | SGSH        | 1485.298825 | 1790.487381 | 2076.782482 |
| 1882.680187 |             |             |             |             |
| BIK         | BIK         | 190.9335241 | 233.5859884 | 384.8208296 |
| 346.9335547 |             |             |             |             |
| TMEM231     | TMEM231     | 72.62502143 | 89.37203036 | 160.7140355 |
| 120.6725408 |             |             |             |             |
| TAGLN2      | TAGLN2      | 31936.26749 | 52610.67373 | 25053.53243 |
| 23803.60142 |             |             |             |             |
| EPC1        | EPC1        | 1255.710048 | 942.4686838 | 1803.568621 |
| 1785.576502 |             |             |             |             |
| SCN4B       | SCN4B       | 1.171371313 | 0           | 0           |
| NIPA1       | NIPA1       | 2298.230517 | 2148.991094 | 1349.997899 |
| 1615.880741 |             |             |             |             |
| COL6A6      | COL6A6      | 0           | 0           | 5.357134518 |
| LOC151174   | LOC151174   |             |             | 1.885508449 |
| 51.78563368 | 197.9783872 |             |             | 71.45365012 |
| MSH5-SAPCD1 | MSH5-SAPCD1 |             |             | 12.18709505 |
| 9.821413283 | 19.79783872 |             |             | 24.59879758 |
|             |             |             |             | 27.42096386 |



|             |             |             |             |             |             |
|-------------|-------------|-------------|-------------|-------------|-------------|
| SFMBT2      | SFMBT2      | 1251.024563 | 529.1230434 | 1239.283785 |             |
| 1279.317483 |             |             |             |             |             |
| ECSIT       | ECSIT       | 1444.30083  | 1681.819117 | 1903.568465 |             |
| 1759.179383 |             |             |             |             |             |
| DCAF8       | DCAF8       | 5367.223358 | 4056.271469 | 4091.957916 |             |
| 4899.493706 |             |             |             |             |             |
| SPARCL1     | SPARCL1     | 1.171371313 | 4.062365016 | 0.892855753 |             |
| 7.542033798 |             |             |             |             |             |
| EFHC1       | EFHC1       | 57.39719436 | 58.90429273 | 247.3210436 |             |
| 247.9443611 |             |             |             |             |             |
| NSUN5P2     | NSUN5P2     | 517.7461205 | 330.0671576 | 494.6420872 |             |
| 451.5792736 |             |             |             |             |             |
| NSUN5P1     | NSUN5P1     | 511.889264  | 353.4257564 | 327.6780614 |             |
| 428.010418  |             |             |             |             |             |
| LOC283683   | LOC283683   |             | 2.342742627 | 0           | 10.71426904 |
| 1.885508449 |             |             |             |             |             |
| IQCH-AS1    | IQCH-AS1    |             | 209.6754651 | 249.8354485 |             |
| 474.1064049 | 528.8851201 |             |             |             |             |
| C16orf96    | C16orf96    |             | 7.028227881 | 3.046773762 | 0           |
| 0.942754225 |             |             |             |             |             |
| GPR133      | GPR133      | 38.65525334 | 23.35859884 | 22.32139383 |             |
| 85.79063445 |             |             |             |             |             |
| RLN2        | RLN2        | 122.9939879 | 105.6214904 | 156.2497568 |             |
| 85.79063445 |             |             |             |             |             |
| MIR664A     | MIR664A     | 1.171371313 | 0           | 0           | 0           |
| RANBP1      | RANBP1      | 10566.94062 | 13902.42868 | 7795.52358  |             |
| 8743.10268  |             |             |             |             |             |
| GPC1        | GPC1        | 153.4496421 | 191.946747  | 135.7140745 |             |
| 106.5312274 |             |             |             |             |             |
| C11orf44    | C11orf44    |             | 22.25605496 | 8.124730032 | 0           |
| 7.542033798 |             |             |             |             |             |
| ZNF322      | ZNF322      | 313.927512  | 374.7531727 | 895.5343203 |             |
| 530.7706285 |             |             |             |             |             |
| KMT2E       | KMT2E       | 6928.661319 | 6836.960322 | 12254.44521 |             |
| 11659.0415  |             |             |             |             |             |
| BRDT        | BRDT        | 0           | 4.062365016 | 0           | 0           |
| DOCK9       | DOCK9       | 2543.047122 | 1218.709505 | 3557.13732  |             |
| 3887.918423 |             |             |             |             |             |
| LRRFIP2     | LRRFIP2     | 1827.339249 | 2184.536787 | 1618.74748  |             |
| 1559.315488 |             |             |             |             |             |
| ZKSCAN5     | ZKSCAN5     | 1489.984311 | 1327.377769 | 1106.248278 |             |
| 1381.134939 |             |             |             |             |             |
| SNRPE       | SNRPE       | 10670.02129 | 9655.226052 | 7249.988715 |             |
| 8252.870483 |             |             |             |             |             |
| TBCB        | TBCB        | 6118.07237  | 9460.232531 | 4393.743161 |             |
| 4304.61579  |             |             |             |             |             |
| CIRBP       | CIRBP       | 4309.475062 | 3420.511344 | 8768.736351 |             |
| 7385.536596 |             |             |             |             |             |
| CHI3L1      | CHI3L1      | 0           | 82.14272928 | 0           |             |
| ZNF630      | ZNF630      | 17.5705697  | 17.26505132 | 257.1424569 |             |

|                |                |             |             |             |             |
|----------------|----------------|-------------|-------------|-------------|-------------|
| 170.6385147    |                |             |             |             |             |
| C12orf74       | C12orf74       |             | 1.171371313 | 0           | 0 0         |
| TAC4           | TAC4           | 16.39919839 | 0           | 4.464278765 | 4.713771124 |
| GATSL3         | GATSL3         | 365.4678498 | 730.2101117 | 424.9993384 |             |
| 300.7385977    |                |             |             |             |             |
| ORC4           | ORC4           | 1792.19811  | 1664.554065 | 2586.603117 |             |
| 2568.062508    |                |             |             |             |             |
| PPP2R3A        | PPP2R3A        | 12.88508445 | 13.2026863  | 46.42849916 |             |
| 33.93915209    |                |             |             |             |             |
| PRIM2          | PRIM2          | 1583.694016 | 1561.979349 | 680.3560838 |             |
| 1140.732612    |                |             |             |             |             |
| SIGLEC10       | SIGLEC10       |             | 16.39919839 | 23.35859884 |             |
| 6.249990271    |                | 22.62610139 |             |             |             |
| HCK            | HCK            | 3.51411394  | 0           | 76.78559476 | 8.484788022 |
| C8G            | C8G            | 5.856856567 | 14.21827756 | 11.60712479 |             |
| 13.19855915    |                |             |             |             |             |
| ZCCHC9         | ZCCHC9         | 1719.573088 | 1588.384721 | 968.748492  |             |
| 1169.957993    |                |             |             |             |             |
| ARF1           | ARF1           | 34207.55647 | 48576.74527 | 36568.69308 |             |
| 33652.55481    |                |             |             |             |             |
| AREG           | AREG           | 5.856856567 | 2.031182508 | 34.82137437 |             |
| 12.25580492    |                |             |             |             |             |
| CGGBP1         | CGGBP1         | 10090.19249 | 7207.65113  | 9133.021498 |             |
| 10443.8313     |                |             |             |             |             |
| APLP2          | APLP2          | 3439.146176 | 4645.314396 | 8061.594594 |             |
| 5892.213904    |                |             |             |             |             |
| PPFIA3         | PPFIA3         | 21.08468364 | 19.29623383 | 59.82133545 |             |
| 39.59567744    |                |             |             |             |             |
| PNRC2          | PNRC2          | 1752.371485 | 2136.803999 | 2341.96064  |             |
| 1781.805485    |                |             |             |             |             |
| TESC           | TESC           | 1275.62336  | 1608.696546 | 575.8919607 |             |
| 604.305458     |                |             |             |             |             |
| ABHD11         | ABHD11         | 797.7038645 | 874.4240697 | 1046.426943 |             |
| 881.4752001    |                |             |             |             |             |
| PDE4B          | PDE4B          | 3668.734954 | 5599.970175 | 3715.172788 |             |
| 3974.651811    |                |             |             |             |             |
| L2HGDH         | L2HGDH         | 953.4962492 | 857.1590184 | 585.713374  |             |
| 759.8599051    |                |             |             |             |             |
| FLI1           | FLI1           | 4987.699053 | 4643.283214 | 2861.602688 |             |
| 3695.596561    |                |             |             |             |             |
| TMSB4X         | TMSB4X         | 427493.1322 | 451065.7152 | 226886.254  |             |
| 277043.413     |                |             |             |             |             |
| HSPB2-C11orf52 | HSPB2-C11orf52 |             | 0           | 3.046773762 | 3.571423012 |
| 4.713771124    |                |             |             |             |             |
| DDX11L9        | DDX11L9        | 2.342742627 | 0           | 4.464278765 | 6.599279573 |
| EXD2           | EXD2           | 506.0324074 | 887.626756  | 978.5699053 |             |
| 959.7238008    |                |             |             |             |             |
| LOC101926889   | LOC101926889   |             | 1.171371313 | 1.015591254 |             |
| 9.821413283    |                | 0.942754225 |             |             |             |
| LSP1           | LSP1           | 32818.31009 | 48582.83882 | 20230.32565 |             |

|                 |               |             |             |  |
|-----------------|---------------|-------------|-------------|--|
| 18941.81788     |               |             |             |  |
| SPDYE2 SPDYE2   | 101.9093043   | 116.7929942 | 141.071209  |  |
| 207.4059294     |               |             |             |  |
| FLOT1 FLOT1     | 0 1.015591254 | 1.785711506 | 0.942754225 |  |
| RGCC RGCC       | 2284.174061   | 2686.238867 | 5841.062336 |  |
| 3687.111773     |               |             |             |  |
| ALYREF ALYREF   | 9612.272998   | 11787.96769 | 5227.670434 |  |
| 5699.892043     |               |             |             |  |
| NT5DC1 NT5DC1   | 2647.299168   | 2309.454512 | 1876.782793 |  |
| 2389.88196      |               |             |             |  |
| FAM156A FAM156A | 108.9375322   | 200.071477  | 140.1783532 |  |
| 122.5580492     |               |             |             |  |
| PM20D1 PM20D1   | 3.51411394    | 25.38978135 | 64.28561422 |  |
| 9.427542247     |               |             |             |  |
| TNK1 TNK1       | 368.9819637   | 432.6418742 | 692.8560644 |  |
| 731.5772784     |               |             |             |  |
| PPDPF PPDPF     | 1550.895619   | 1073.479956 | 1508.033367 |  |
| 505.3162644     |               |             |             |  |
| AVL9 AVL9       | 928.8974516   | 1316.206265 | 993.7484531 |  |
| 1311.371127     |               |             |             |  |
| PROCR PROCR     | 65.59679355   | 79.21611782 | 74.99988325 |  |
| 80.1341091      |               |             |             |  |
| NEBL NEBL       | 28.11291152   | 17.26505132 | 114.2855364 |  |
| 9.427542247     |               |             |             |  |
| PMF1 PMF1       | 4117.370167   | 4819.996092 | 3130.35227  |  |
| 3886.032914     |               |             |             |  |
| CA5B CA5B       | 386.5525334   | 411.3144579 | 829.4629946 |  |
| 487.4039342     |               |             |             |  |
| RNF139 RNF139   | 3714.418435   | 3874.480634 | 4364.278921 |  |
| 3922.800329     |               |             |             |  |
| PDCD10 PDCD10   | 5467.961291   | 6148.389452 | 4870.528133 |  |
| 4851.41324      |               |             |             |  |
| SYNE1 SYNE1     | 5670.608528   | 3358.560277 | 6461.597085 |  |
| 6382.446101     |               |             |             |  |
| PFDN5 PFDN5     | 6278.55024    | 6100.656663 | 8708.022159 |  |
| 7409.105452     |               |             |             |  |
| C1orf43 C1orf43 | 9394.397934   | 11709.76716 | 10894.6259  |  |
| 9172.998606     |               |             |             |  |
| GPR56 GPR56     | 2548.903978   | 165.5413744 | 116.0712479 |  |
| 637.3018559     |               |             |             |  |
| HDLBP HDLBP     | 15292.2525    | 16035.17031 | 13174.08664 |  |
| 13810.40664     |               |             |             |  |
| STK38 STK38     | 9127.325274   | 8542.138038 | 6959.810595 |  |
| 6815.17029      |               |             |             |  |
| CHEK2 CHEK2     | 1368.161694   | 1409.640661 | 518.7491925 |  |
| 883.3607086     |               |             |             |  |
| OSBPL2 OSBPL2   | 1684.431949   | 1786.425016 | 2264.28219  |  |
| 2306.919588     |               |             |             |  |
| RETSAT RETSAT   | 1780.484396   | 1817.908345 | 1213.390968 |  |
| 1229.351509     |               |             |             |  |

|             |             |             |             |             |             |
|-------------|-------------|-------------|-------------|-------------|-------------|
| OBFC1       | OBFC1       | 2369.684167 | 4213.688113 | 4482.13588  |             |
| 3764.417619 |             |             |             |             |             |
| KIAA0226L   | KIAA0226L   |             | 40.99799597 | 1.015591254 | 0           |
|             | 39.59567744 |             |             |             |             |
| FOXP3       | FOXP3       | 3994.376179 | 14890.59897 | 4858.921008 |             |
| 5319.019336 |             |             |             |             |             |
| BAZ1A       | BAZ1A       | 3956.892297 | 4272.592406 | 4792.849682 |             |
| 4734.511717 |             |             |             |             |             |
| EMR2        | EMR2        | 201.4758659 | 5.07795627  | 10.71426904 |             |
| 115.9587696 |             |             |             |             |             |
| IRS2        | IRS2        | 112.4516461 | 68.04461402 | 465.1778473 |             |
| 329.9639787 |             |             |             |             |             |
| SUPT3H      | SUPT3H      | 510.7178927 | 387.955859  | 688.3917856 |             |
| 577.9083398 |             |             |             |             |             |
| KLF11       | KLF11       | 803.560721  | 783.0208569 | 1048.212654 |             |
| 940.8687163 |             |             |             |             |             |
| PKDREJ      | PKDREJ      | 1.171371313 | 1.015591254 | 4.464278765 |             |
| 7.542033798 |             |             |             |             |             |
| BTN3A2      | BTN3A2      | 2579.359632 | 2097.19594  | 8649.986535 |             |
| 7493.953332 |             |             |             |             |             |
| CPAMD8      | CPAMD8      | 19.91331233 | 30.46773762 | 7.142846024 |             |
| 3.771016899 |             |             |             |             |             |
| PIK3R2      | PIK3R2      | 1418.530661 | 1783.378242 | 1583.03325  |             |
| 1689.415571 |             |             |             |             |             |
| WIBG        | WIBG        | 4057.63023  | 5412.085793 | 2372.317736 |             |
| 2619.91399  |             |             |             |             |             |
| LSS         | LSS         | 1957.361465 | 2007.823909 | 1885.71135  |             |
| 2046.719422 |             |             |             |             |             |
| FAM104B     | FAM104B     | 561.0868591 | 633.7289425 | 478.5706836 |             |
| 483.6329173 |             |             |             |             |             |
| PDLIM7      | PDLIM7      | 1085.861208 | 1024.731575 | 554.4634226 |             |
| 796.6273199 |             |             |             |             |             |
| ZBTB16      | ZBTB16      | 490.8045803 | 705.8359216 | 224.106794  |             |
| 606.1909665 |             |             |             |             |             |
| IDH1        | IDH1        | 2212.720411 | 2389.686221 | 1614.283201 |             |
| 1860.99684  |             |             |             |             |             |
| CIDEB       | CIDEB       | 1323.649584 | 1134.415431 | 1073.212615 |             |
| 1508.40676  |             |             |             |             |             |
| CPNE7       | CPNE7       | 424.0364155 | 140.1515931 | 143.7497762 |             |
| 248.8871153 |             |             |             |             |             |
| ZSCAN26     | ZSCAN26     | 605.5989691 | 764.7402143 | 1549.997587 |             |
| 1537.632141 |             |             |             |             |             |
| DPF1        | DPF1        | 12.88508445 | 20.31182508 | 16.07140355 |             |
| 15.0840676  |             |             |             |             |             |
| CTXN1       | CTXN1       | 9.370970508 | 5.07795627  | 0           | 0.942754225 |
| NMRK1       | NMRK1       | 2976.454508 | 1031.840714 | 1691.961652 |             |
| 2585.032084 |             |             |             |             |             |
| P4HA2       | P4HA2       | 557.5727452 | 749.5063455 | 191.0711311 |             |
| 475.1481293 |             |             |             |             |             |
| SMN1        | SMN1        | 986.2946459 | 1317.221857 | 1178.569594 |             |

|             |             |             |             |               |
|-------------|-------------|-------------|-------------|---------------|
| 1169.957993 |             |             |             |               |
| PCBP4       | PCBP4       | 579.8288002 | 408.2676841 | 200.8925444   |
| 434.6096976 |             |             |             |               |
| PIK3CB      | PIK3CB      | 1513.411737 | 922.1568587 | 2111.603856   |
| 1751.63735  |             |             |             |               |
| DMAP1       | DMAP1       | 2390.768851 | 3354.497912 | 2104.46101    |
| 2255.068106 |             |             |             |               |
| WDR6        | WDR6        | 11072.97303 | 10643.39634 | 10749.09041   |
| 10864.29969 |             |             |             |               |
| AHSA1       | AHSA1       | 9021.901856 | 11448.76021 | 9941.055954   |
| 8843.977382 |             |             |             |               |
| ENTPD3      | ENTPD3      | 9.370970508 | 8.124730032 | 0 13.19855915 |
| SEC22B      | SEC22B      | 4990.041795 | 4311.184873 | 4342.850383   |
| 5060.704678 |             |             |             |               |
| HHEX        | HHEX        | 28.11291152 | 25.38978135 | 8.035701777   |
| 2.828262674 |             |             |             |               |
| SRGN        | SRGN        | 22133.06097 | 16515.54497 | 13441.94336   |
| 18204.58408 |             |             |             |               |
| DAG1        | DAG1        | 735.6211849 | 401.1585454 | 437.499319    |
| 541.140925  |             |             |             |               |
| CMTM2       | CMTM2       | 2.342742627 | 8.124730032 | 12.49998054   |
| 6.599279573 |             |             |             |               |
| UIMC1       | UIMC1       | 1422.044775 | 1508.153012 | 1988.389762   |
| 1570.628538 |             |             |             |               |
| GNPAT       | GNPAT       | 5029.86842  | 6051.908283 | 4659.814175   |
| 4564.815956 |             |             |             |               |
| ADK         | ADK         | 4633.944916 | 5073.893905 | 2725.888614   |
| 4038.759099 |             |             |             |               |
| ANGPT1      | ANGPT1      | 1.171371313 | 1.015591254 | 0.892855753   |
| 2.828262674 |             |             |             |               |
| PAFAH2      | PAFAH2      | 1567.294817 | 2023.057778 | 1518.747636   |
| 1289.687779 |             |             |             |               |
| TESK1       | TESK1       | 1138.572917 | 654.0407676 | 1166.962469   |
| 1086.995621 |             |             |             |               |
| TACC1       | TACC1       | 12733.97755 | 10633.24043 | 8120.523074   |
| 10243.96741 |             |             |             |               |
| LRRN2       | LRRN2       | 30.45565415 | 38.59246765 | 0 0           |
| VRK2        | VRK2        | 2376.712395 | 2494.29212  | 1869.639947   |
| 2272.980436 |             |             |             |               |
| RAB3GAP2    | RAB3GAP2    |             | 4581.233207 | 3818.623115   |
| 3055.352387 | 3696.539315 |             |             |               |
| SLC22A18AS  | SLC22A18AS  |             | 77.31050669 | 41.63924142   |
| 24.10710533 | 73.53482953 |             |             |               |
| IL4I1       | IL4I1       | 1795.712224 | 2171.334101 | 2683.031538   |
| 4269.733884 |             |             |             |               |
| FDXR        | FDXR        | 3083.049297 | 5524.816422 | 2884.816938   |
| 1601.739428 |             |             |             |               |
| PPP2R1B     | PPP2R1B     | 7740.421639 | 9257.114281 | 4300.886162   |
| 5911.068989 |             |             |             |               |
| ZNF532      | ZNF532      | 70.28227881 | 23.35859884 | 260.7138799   |

|             |            |             |             |             |
|-------------|------------|-------------|-------------|-------------|
| 293.1965639 |            |             |             |             |
| EIF1AY      | EIF1AY     | 5634.296018 | 0           | 0           |
| SEC24B      | SEC24B     | 3842.097908 | 3398.168336 | 3707.852366 |
| 4819.359597 |            |             |             | 4333.028969 |
| CDRT1       | CDRT1      | 45.68348122 | 3.046773762 | 20.53568232 |
| 2.828262674 |            |             |             |             |
| SYT9        | SYT9       | 3.51411394  | 0           | 0           |
| ZNF48       | ZNF48      | 1925.734439 | 1679.787934 | 1341.069341 |
| 1557.429979 |            |             |             |             |
| NFKBIB      | NFKBIB     | 2404.825307 | 2226.176029 | 1666.068835 |
| 1497.093709 |            |             |             |             |
| ABTB1       | ABTB1      | 1801.56908  | 1276.598206 | 2753.567142 |
| 2111.769463 |            |             |             |             |
| CYB561D1    | CYB561D1   |             | 920.6978524 | 609.3547524 |
| 1446.42632  |            | 1348.138541 |             |             |
| GPR146      | GPR146     | 443.9497278 | 896.7670773 | 262.4995914 |
| 305.4523688 |            |             |             |             |
| GLCCI1      | GLCCI1     | 2185.778871 | 1428.936894 | 2104.46101  |
| 2584.08933  |            |             |             |             |
| CABLES1     | CABLES1    | 1397.445977 | 2454.684061 | 241.9639091 |
| 425.1821553 |            |             |             |             |
| TAS1R1      | TAS1R1     | 1.171371313 | 8.124730032 | 0           |
| KRR1        | KRR1       | 4601.146519 | 4068.458564 | 7.542033798 |
| 4735.454471 |            |             |             | 3426.78038  |
| CACYBP      | CACYBP     | 19461.163   | 27959.22722 | 14632.12008 |
| 16089.98635 |            |             |             |             |
| OS9         | OS9        | 5590.955279 | 4828.120822 | 4221.422    |
| 4065.156217 |            |             |             |             |
| CCDC150     | CCDC150    | 267.0726595 | 182.8064257 | 109.8212576 |
| 77.30584643 |            |             |             |             |
| KREMEN1     | KREMEN1    | 11.71371313 | 11.17150379 | 25.89281684 |
| 6.599279573 |            |             |             |             |
| IGF1        | IGF1       | 32.79839678 | 46.71719769 | 18.74997081 |
| 16.02682182 |            |             |             |             |
| ZFYVE16     | ZFYVE16    | 687.594961  | 477.3278894 | 654.463267  |
| 696.6953721 |            |             |             |             |
| CD6         | CD6        | 23289.20445 | 21434.05342 | 25045.49673 |
| 27507.68277 |            |             |             |             |
| SMARCD1     | SMARCD1    | 1500.526653 | 624.5886212 | 622.3204599 |
| 625.046051  |            |             |             |             |
| VAMP4       | VAMP4      | 1754.714228 | 1486.825596 | 1933.925561 |
| 2110.826709 |            |             |             |             |
| VAMP8       | VAMP8      | 5552.300026 | 8837.675093 | 5379.455912 |
| 4891.008918 |            |             |             |             |
| SLC4A4      | SLC4A4     | 7.028227881 | 0           | 45.5356434  |
| LCP1        | LCP1       | 186987.1741 | 220844.3806 | 9.427542247 |
| 157001.5748 |            |             |             | 120040.8846 |
| FARSA       | FARSA      | 11118.65651 | 16978.65459 | 10019.62726 |
| 9859.323682 |            |             |             |             |
| DLGAP1-AS2  | DLGAP1-AS2 |             | 10.54234182 | 22.34300759 |

|               |             |               |               |  |
|---------------|-------------|---------------|---------------|--|
| 18.74997081   | 26.39711829 |               |               |  |
| SNHG22 SNHG22 | 3.51411394  | 8.124730032   | 69.64274874   |  |
| 58.45076193   |             |               |               |  |
| FAP FAP       | 0 0         | 2.678567259   | 2.828262674   |  |
| GOLGB1 GOLGB1 | 2742.180245 | 2559.28996    | 3199.995019   |  |
| 3771.016899   |             |               |               |  |
| XKR5 XKR5     | 5.856856567 | 3.046773762   | 0 0.942754225 |  |
| MCOLN3 MCOLN3 | 46.85485254 | 34.53010264   | 10.71426904 0 |  |
| OGDH OGDH     | 7967.667674 | 4257.358537   | 2394.63913    |  |
| 3178.967246   |             |               |               |  |
| RNF24 RNF24   | 723.9074717 | 1173.007898   | 1578.568971   |  |
| 1506.521251   |             |               |               |  |
| DPP8 DPP8     | 3614.851873 | 3681.518296   | 3507.137398   |  |
| 3387.315929   |             |               |               |  |
| MAP2K7 MAP2K7 | 230.7601488 | 43.67042392   | 62.49990271   |  |
| 51.85148236   |             |               |               |  |
| IFT122 IFT122 | 1162.000343 | 1707.208898   | 1059.819779   |  |
| 1082.28185    |             |               |               |  |
| CITED4 CITED4 | 29.28428284 | 173.6661044   | 550.8919996   |  |
| 306.395123    |             |               |               |  |
| ZNF418 ZNF418 | 73.79639275 | 61.9510665    | 52.67848943   |  |
| 118.7870323   |             |               |               |  |
| ZBED2 ZBED2   | 13799.92544 | 9016.419153   | 17063.3663    |  |
| 28154.41217   |             |               |               |  |
| ZFP90 ZFP90   | 1290.851187 | 690.6020528   | 1628.568894   |  |
| 2122.13976    |             |               |               |  |
| SLC25A38      | SLC25A38    | 3384.091725   | 4850.463829   |  |
| 4924.099478   | 3987.850371 |               |               |  |
| ASB6 ASB6     | 4410.212995 | 5885.351317   | 5326.777423   |  |
| 4599.697862   |             |               |               |  |
| WNT2B WNT2B   | 1.171371313 | 0 16.07140355 | 8.484788022   |  |
| DHDDS DHDDS   | 2601.615687 | 3338.248452   | 2416.067668   |  |
| 2506.783484   |             |               |               |  |
| FAM72D FAM72D | 1218.226166 | 1133.39984    | 320.5352153   |  |
| 842.8222769   |             |               |               |  |
| PTPRE PTPRE   | 1651.633552 | 1826.033075   | 1437.497762   |  |
| 1716.755443   |             |               |               |  |
| DUSP23 DUSP23 | 781.3046661 | 1122.228336   | 1141.069652   |  |
| 905.0440557   |             |               |               |  |
| LUC7L LUC7L   | 1255.710048 | 1505.106239   | 1666.068835   |  |
| 1386.791465   |             |               |               |  |
| FLAD1 FLAD1   | 4206.394387 | 6781.102803   | 5084.813514   |  |
| 4568.586973   |             |               |               |  |
| GPX1 GPX1     | 6733.04231  | 10825.18718   | 5005.349351   |  |
| 4303.673036   |             |               |               |  |
| MOB3C MOB3C   | 1118.659604 | 1755.957278   | 2608.031655   |  |
| 2608.60094    |             |               |               |  |
| MIR105-1      | MIR105-1    | 1.171371313   | 0 0 0         |  |
| LHX1 LHX1     | 44.51210991 | 12.18709505   | 7.142846024   |  |
| 1.885508449   |             |               |               |  |

|                 |               |               |             |   |
|-----------------|---------------|---------------|-------------|---|
| PHACTR1 PHACTR1 | 7.028227881   | 3.046773762   | 3.571423012 |   |
| 11.3130507      |               |               |             |   |
| PTGER3 PTGER3   | 0 11.17150379 | 0             | 0           |   |
| BDH2 BDH2       | 969.8954475   | 994.2638377   | 843.7486866 |   |
| 871.1049036     |               |               |             |   |
| 8-Sep 8-Sep     | 479.0908672   | 516.9359483   | 333.0351959 |   |
| 488.3466884     |               |               |             |   |
| METAP1 METAP1   | 3464.916345   | 3303.718349   | 3458.030331 |   |
| 3300.582541     |               |               |             |   |
| TMEM74 TMEM74   | 1.171371313   | 1.015591254   | 11.60712479 | 0 |
| TMEM130 TMEM130 | 0 4.062365016 | 0             | 0           |   |
| NIM1K NIM1K     | 21.08468364   | 25.38978135   | 9.821413283 |   |
| 18.85508449     |               |               |             |   |
| RAD23A RAD23A   | 8991.446202   | 10850.57696   | 8919.628973 |   |
| 8778.927341     |               |               |             |   |
| CTCFL CTCFL     | 0 0           | 1.785711506   | 0           |   |
| MARCKSL1        | MARCKSL1      | 3402.833666   | 3218.408684 |   |
| 2149.996653     | 1830.828704   |               |             |   |
| GPR34 GPR34     | 549.373146    | 332.0983401   | 84.82129654 |   |
| 162.1537267     |               |               |             |   |
| MOV10L1 MOV10L1 | 1.171371313   | 0 0           | 0.942754225 |   |
| CDK2AP2 CDK2AP2 | 12190.46126   | 14488.42483   | 9308.914081 |   |
| 9436.027035     |               |               |             |   |
| KIAA0895        | KIAA0895      | 247.1593471   | 303.661785  |   |
| 80.35701777     | 148.0124133   |               |             |   |
| PRSS8 PRSS8     | 2.342742627   | 0 4.464278765 | 3.771016899 |   |
| PRSS2 PRSS2     | 0 0           | 0 3.771016899 |             |   |
| CETN2 CETN2     | 718.0506152   | 825.6756895   | 641.9632864 |   |
| 770.2302016     |               |               |             |   |
| SLBP SLBP       | 13102.95951   | 14772.79038   | 9410.699637 |   |
| 10080.87092     |               |               |             |   |
| BRAF BRAF       | 564.6009731   | 337.1762963   | 638.3918634 |   |
| 642.9583813     |               |               |             |   |
| BPHL BPHL       | 351.411394    | 568.7311023   | 529.4634615 |   |
| 569.4235517     |               |               |             |   |
| DCSTAMP DCSTAMP | 0 0           | 16.07140355   | 30.16813519 |   |
| ZNF670 ZNF670   | 240.1311193   | 269.1316823   | 655.3561227 |   |
| 431.7814349     |               |               |             |   |
| MRPL54 MRPL54   | 1905.821127   | 3048.804945   | 1491.069108 |   |
| 1082.28185      |               |               |             |   |
| CHST14 CHST14   | 182.7339249   | 80.23170907   | 43.7499319  |   |
| 100.874702      |               |               |             |   |
| NOTCH1 NOTCH1   | 2766.779042   | 794.1923607   | 1356.247889 |   |
| 1350.966804     |               |               |             |   |
| GDPD2 GDPD2     | 3.51411394    | 0 0           | 0           |   |
| 1-Sep 1-Sep     | 15415.24649   | 14011.09694   | 6235.704579 |   |
| 8996.703566     |               |               |             |   |
| PARD6B PARD6B   | 80.82462063   | 48.74838019   | 207.1425347 |   |
| 237.5740646     |               |               |             |   |
| EXOSC7 EXOSC7   | 2496.192269   | 3307.780714   | 2428.567648 |   |



|             |             |             |             |             |   |
|-------------|-------------|-------------|-------------|-------------|---|
| 2199.445606 |             |             |             |             |   |
| MIR4292     | MIR4292     | 14.05645576 | 7.109138778 | 9.821413283 |   |
| 2.828262674 |             |             |             |             |   |
| QSOX1       | QSOX1       | 1085.861208 | 1016.606845 | 810.7130238 |   |
| 932.3839282 |             |             |             |             |   |
| ALG11       | ALG11       | 1413.845175 | 1538.62075  | 2019.639713 |   |
| 2030.6926   |             |             |             |             |   |
| MEN1        | MEN1        | 3774.158372 | 4608.753111 | 4116.065021 |   |
| 4257.478079 |             |             |             |             |   |
| STAMBPL1    | STAMBPL1    |             | 1398.617348 | 2526.79104  |   |
| 2057.139655 | 2270.152173 |             |             |             |   |
| USP35       | USP35       | 234.2742627 | 173.6661044 | 195.5354099 |   |
| 165.9247436 |             |             |             |             |   |
| NELFCD      | NELFCD      | 6613.562436 | 9093.604089 | 7199.095937 |   |
| 7473.212739 |             |             |             |             |   |
| CDKN1A      | CDKN1A      | 7943.068877 | 20304.71594 | 9096.414412 |   |
| 6053.424877 |             |             |             |             |   |
| MAP2        | MAP2        | 3.51411394  | 5.07795627  | 15.1785478  | 0 |
| HNRNPU      | HNRNPU      | 52682.42482 | 51696.6416  | 38491.01151 |   |
| 49059.04435 |             |             |             |             |   |
| TSHR        | TSHR        | 513.0606353 | 115.777403  | 48.21421066 |   |
| 122.5580492 |             |             |             |             |   |
| EPGN        | EPGN        | 8.199599194 | 11.17150379 | 13.3928363  | 0 |
| PHF19       | PHF19       | 8707.974344 | 8742.209515 | 2183.925172 |   |
| 2695.334328 |             |             |             |             |   |
| NTMT1       | NTMT1       | 2619.186257 | 3906.979554 | 3437.494649 |   |
| 2785.838734 |             |             |             |             |   |
| UBL7        | UBL7        | 5494.902831 | 6972.033959 | 4480.350169 |   |
| 4113.236682 |             |             |             |             |   |
| BLOC1S5     | BLOC1S5     | 1905.821127 | 2080.94648  | 2266.960757 |   |
| 2464.359543 |             |             |             |             |   |
| SSC5D       | SSC5D       | 3.51411394  | 3.046773762 | 3.571423012 |   |
| 12.25580492 |             |             |             |             |   |
| IFIT5       | IFIT5       | 1741.829143 | 1783.378242 | 7704.452293 |   |
| 5139.896033 |             |             |             |             |   |
| INMT        | INMT        | 1.171371313 | 4.062365016 | 8.035701777 |   |
| 2.828262674 |             |             |             |             |   |
| DDX18       | DDX18       | 4160.710905 | 5252.637966 | 7347.309992 |   |
| 6665.272369 |             |             |             |             |   |
| NCAM2       | NCAM2       | 0           | 1.785711506 | 0           |   |
| NDUFA1      | NDUFA1      | 10400.60589 | 10680.97322 | 7864.273473 |   |
| 7954.017394 |             |             |             |             |   |
| KRT17       | KRT17       | 11.71371313 | 37.5768764  | 64.28561422 |   |
| 7.542033798 |             |             |             |             |   |
| COX6C       | COX6C       | 15209.08513 | 14107.57811 | 9646.413556 |   |
| 10955.74685 |             |             |             |             |   |
| ADAR        | ADAR        | 37843.49302 | 26994.41553 | 42873.14755 |   |
| 37250.10493 |             |             |             |             |   |
| SLC15A2     | SLC15A2     | 63.25405093 | 40.62365016 | 11.60712479 |   |
| 19.79783872 |             |             |             |             |   |

|          |          |             |             |             |             |
|----------|----------|-------------|-------------|-------------|-------------|
| CLDN9    | CLDN9    | 0           | 13.2026863  | 0           | 0           |
| COQ2     | COQ2     | 1098.746292 | 1008.482115 | 972.319915  |             |
|          |          | 1133.190578 |             |             |             |
| SGSM3    | SGSM3    | 3823.355967 | 3869.402678 | 3358.923343 |             |
|          |          | 4596.8696   |             |             |             |
| ADAMTS7  | ADAMTS7  | 0           | 8.124730032 | 0.892855753 | 0           |
| SLC38A4  | SLC38A4  | 1.171371313 | 0           | 0           | 0           |
| H1F0     | H1F0     | 327.9839678 | 152.3386881 | 650.891844  |             |
|          |          | 285.6545301 |             |             |             |
| GZMM     | GZMM     | 999.1797304 | 789.1144044 | 758.9273901 |             |
|          |          | 789.0852861 |             |             |             |
| GRPR     | GRPR     | 0           | 2.031182508 | 0           | 8.484788022 |
| PDIA3    | PDIA3    | 25069.68885 | 27174.17518 | 40862.43639 |             |
|          |          | 34861.16572 |             |             |             |
| CYSLTR2  | CYSLTR2  | 49.19759517 | 32.49892013 | 163.3926028 |             |
|          |          | 131.0428372 |             |             |             |
| ATG13    | ATG13    | 7900.899509 | 9385.078779 | 9351.771157 |             |
|          |          | 8511.185141 |             |             |             |
| SBN02    | SBN02    | 1978.446148 | 289.4435074 | 581.2490952 |             |
|          |          | 849.4215565 |             |             |             |
| SLC8A2   | SLC8A2   | 0           | 0           | 2.678567259 | 0           |
| EBP      | EBP      | 8403.417803 | 16244.38211 | 5142.849137 |             |
|          |          | 5524.539757 |             |             |             |
| GNA13    | GNA13    | 9180.036984 | 5846.75885  | 7542.845402 |             |
|          |          | 7933.276801 |             |             |             |
| FARS2    | FARS2    | 1717.230346 | 1673.694387 | 1067.855481 |             |
|          |          | 1611.16697  |             |             |             |
| SKIL     | SKIL     | 952.3248778 | 580.9181973 | 1634.818884 |             |
|          |          | 1161.473205 |             |             |             |
| PALM3    | PALM3    | 0           | 4.062365016 | 0           | 1.885508449 |
| CLTCL1   | CLTCL1   | 43.3407386  | 35.54569389 | 52.67848943 |             |
|          |          | 83.905126   |             |             |             |
| CD9      | CD9      | 1730.11543  | 1850.407265 | 804.4630335 |             |
|          |          | 1169.957993 |             |             |             |
| ST3GAL2  | ST3GAL2  | 2745.694359 | 2134.772816 | 2141.068096 |             |
|          |          | 1721.469214 |             |             |             |
| USP11    | USP11    | 3750.730946 | 3788.155378 | 11447.30361 |             |
|          |          | 7553.346848 |             |             |             |
| PNPLA4   | PNPLA4   | 333.8408243 | 671.3058189 | 549.9991439 |             |
|          |          | 282.8262674 |             |             |             |
| PRH2     | PRH2     | 1.171371313 | 1.015591254 | 0           | 0           |
| HIST1H3I | HIST1H3I |             | 69.11090749 | 38.59246765 |             |
|          |          | 24.10710533 |             |             |             |
| HIST1H3E | HIST1H3E | 14.14131337 | 29.28428284 | 47.73278894 |             |
|          |          | 40.17850889 |             |             |             |
| JMJD4    | JMJD4    | 2041.700199 | 2423.200732 | 2754.459998 |             |
|          |          | 2230.556496 |             |             |             |
| MCPH1    | MCPH1    | 2026.472372 | 1966.184668 | 2006.246877 |             |
|          |          | 2181.533276 |             |             |             |
| MYD88    | MYD88    | 13084.21757 | 17112.71263 | 12899.08706 |             |

|             |           |             |             |             |             |
|-------------|-----------|-------------|-------------|-------------|-------------|
| 12349.13759 |           |             |             |             |             |
| CASP10      | CASP10    | 1328.335069 | 1928.607791 | 1152.676777 |             |
| 708.0084228 |           |             |             |             |             |
| TEC         | TEC       | 35.1411394  | 37.5768764  | 434.8207517 |             |
| 137.6421168 |           |             |             |             |             |
| SECISBP2    | SECISBP2  |             | 2046.385685 | 1826.033075 |             |
| 3342.851939 |           | 3220.448432 |             |             |             |
| SEPP1       | SEPP1     | 85.51010588 | 30.46773762 | 77.67845051 |             |
| 188.5508449 |           |             |             |             |             |
| EWSR1       | EWSR1     | 43327.85351 | 55850.40983 | 35155.30242 |             |
| 35550.31906 |           |             |             |             |             |
| DNAJC5B     | DNAJC5B   | 5.856856567 | 5.07795627  | 7.142846024 |             |
| 5.656525348 |           |             |             |             |             |
| EYA2        | EYA2      | 1.171371313 | 11.17150379 | 0           | 0           |
| FCGR3A      | FCGR3A    | 7.028227881 | 1.015591254 | 0           | 0           |
| ULK4P2      | ULK4P2    | 0           | 1.015591254 | 0           | 0           |
| TMP0-AS1    | TMP0-AS1  |             | 2718.752819 | 3204.190407 |             |
| 1466.069146 |           | 1617.76625  |             |             |             |
| TUBBP5      | TUBBP5    | 0           | 2.031182508 | 0           | 0           |
| INTS4L2     | INTS4L2   | 2.342742627 | 13.2026863  | 1.785711506 |             |
| 17.91233027 |           |             |             |             |             |
| SMG1P1      | SMG1P1    | 588.0283994 | 457.0160643 | 508.9277792 |             |
| 627.8743137 |           |             |             |             |             |
| RPL21P44    | RPL21P44  |             | 7.028227881 | 1.015591254 |             |
| 18.74997081 |           | 40.53843166 |             |             |             |
| PRR26       | PRR26     | 0           | 0           | 0.892855753 | 0           |
| LINC00469   | LINC00469 |             | 7.028227881 | 0           | 16.07140355 |
|             |           | 6.599279573 |             |             |             |
| SLC7A2      | SLC7A2    | 0           | 0           | 0.892855753 | 1.885508449 |
| ECE1        | ECE1      | 6791.610875 | 6390.10017  | 6782.1323   |             |
| 6598.336819 |           |             |             |             |             |
| SLFN14      | SLFN14    | 9.370970508 | 7.109138778 | 5.357134518 |             |
| 4.713771124 |           |             |             |             |             |
| PTCH1       | PTCH1     | 40.99799597 | 20.31182508 | 249.9996108 |             |
| 190.4363534 |           |             |             |             |             |
| ABLIM2      | ABLIM2    | 11.71371313 | 13.2026863  | 87.4998638  |             |
| 52.79423658 |           |             |             |             |             |
| LTB4R2      | LTB4R2    | 367.8105924 | 297.5682374 | 290.1781197 |             |
| 369.5596561 |           |             |             |             |             |
| PRKACA      | PRKACA    | 256.5303176 | 175.697287  | 130.3569399 |             |
| 170.6385147 |           |             |             |             |             |
| SORT1       | SORT1     | 117.1371313 | 299.5994199 | 67.85703723 |             |
| 36.76741476 |           |             |             |             |             |
| RAB27A      | RAB27A    | 9533.79112  | 4719.452558 | 3259.816354 |             |
| 4947.574171 |           |             |             |             |             |
| FIG4        | FIG4      | 2191.635727 | 2241.409898 | 1834.818572 |             |
| 2006.18099  |           |             |             |             |             |
| SPIN2B      | SPIN2B    | 203.8186085 | 214.2897546 | 151.785478  |             |
| 211.1769463 |           |             |             |             |             |
| LRRC66      | LRRC66    | 1.171371313 | 5.07795627  | 0           | 13.19855915 |

|              |              |             |             |             |
|--------------|--------------|-------------|-------------|-------------|
| C1orf53      | C1orf53      | 28.11291152 | 44.68601518 | 50.89277792 |
| 13.19855915  |              |             |             |             |
| MAGIX        | MAGIX        | 22.25605496 | 73.12257029 | 67.85703723 |
| 42.42394011  |              |             |             |             |
| ZNF285       | ZNF285       | 76.13913537 | 74.13816155 | 123.2140939 |
| 113.130507   |              |             |             |             |
| CPT1C        | CPT1C        | 7.028227881 | 13.2026863  | 24.10710533 |
| 21.68334717  |              |             |             |             |
| AXL          | AXL          | 3.51411394  | 8.124730032 | 239.2853418 |
| 56.56525348  |              |             |             |             |
| OPN1SW       | OPN1SW       | 19.91331233 | 96.48116913 | 182.1425736 |
| 12.25580492  |              |             |             |             |
| EIF4A2       | EIF4A2       | 4481.666645 | 4117.206944 | 15340.15469 |
| 12340.6528   |              |             |             |             |
| ERCC3        | ERCC3        | 5252.42897  | 6555.641545 | 5729.455367 |
| 5409.523741  |              |             |             |             |
| ATP1B2       | ATP1B2       | 5.856856567 | 1.015591254 | 16.07140355 |
| 1.885508449  |              |             |             |             |
| LOC101928784 | LOC101928784 |             | 327.9839678 | 168.5881482 |
| 343.7494649  | 564.7097806  |             |             |             |
| FGF17        | FGF17        | 0           | 16.96425931 | 0           |
| FGF18        | FGF18        | 7.028227881 | 3.046773762 | 0           |
| DPM1         | DPM1         | 3509.428455 | 3297.624802 | 14.14131337 |
| 3673.913214  |              |             |             | 3259.816354 |
| SYTL3        | SYTL3        | 2280.659947 | 2736.002838 | 2341.067784 |
| 3226.104957  |              |             |             |             |
| RPRD1B       | RPRD1B       | 2287.688175 | 2322.657198 | 1826.782871 |
| 2412.508061  |              |             |             |             |
| HPS5         | HPS5         | 3017.452503 | 3892.761277 | 3747.315595 |
| 3194.051313  |              |             |             |             |
| MRPS18A      | MRPS18A      | 3733.160376 | 5385.68042  | 3486.601716 |
| 3608.863172  |              |             |             |             |
| RSPH9        | RSPH9        | 33.96976809 | 47.73278894 | 60.71419121 |
| 33.93915209  |              |             |             |             |
| TMEM254-AS1  | TMEM254-AS1  |             | 113.6230174 | 163.5101919 |
| 387.4993968  | 169.6957604  |             |             |             |
| CEP85L       | CEP85L       | 1158.486229 | 991.217064  | 1754.461555 |
| 1698.843113  |              |             |             |             |
| UBA5         | UBA5         | 4301.275463 | 4884.993932 | 3161.602221 |
| 3811.555331  |              |             |             |             |
| ARID5B       | ARID5B       | 4747.567933 | 3994.320402 | 4188.386337 |
| 5325.618615  |              |             |             |             |
| ITIH1        | ITIH1        | 0           | 2.678567259 | 0           |
| C7orf50      | C7orf50      | 2093.240537 | 3837.919349 | 4413.385987 |
| 2798.094539  |              |             |             |             |
| RCL1         | RCL1         | 2157.665959 | 2329.766337 | 1815.175746 |
| 2228.670987  |              |             |             |             |
| HMGCR        | HMGCR        | 3645.307527 | 3620.582821 | 3869.636834 |
| 3999.163421  |              |             |             |             |
| DPYD         | DPYD         | 2321.657943 | 3390.043606 | 2717.852912 |

|              |              |             |             |             |
|--------------|--------------|-------------|-------------|-------------|
| 2561.463229  |              |             |             |             |
| TPI1         | TPI1         | 65466.77134 | 111434.7348 | 59673.1214  |
| 62805.3437   |              |             |             |             |
| ADAL         | ADAL         | 620.8267961 | 800.2859082 | 783.0344954 |
| 766.4591847  |              |             |             |             |
| CERKL        | CERKL        | 4337.587974 | 2560.305551 | 599.1062103 |
| 1358.508838  |              |             |             |             |
| NR3C1        | NR3C1        | 3289.210648 | 2657.802312 | 7958.916183 |
| 8079.403706  |              |             |             |             |
| ZNF185       | ZNF185       | 176.8770683 | 184.8376082 | 223.2139383 |
| 160.2682182  |              |             |             |             |
| LYRM7        | LYRM7        | 1620.006527 | 1385.266471 | 1827.675726 |
| 2106.112938  |              |             |             |             |
| ATG4B        | ATG4B        | 4708.91268  | 5751.293272 | 4406.243141 |
| 4121.72147   |              |             |             |             |
| MAPK1        | MAPK1        | 9126.153903 | 7585.451077 | 9073.200162 |
| 9330.438562  |              |             |             |             |
| LOC728819    | LOC728819    | 0           | 2.031182508 | 44.64278765 |
| 0            |              |             |             |             |
| LOC101927151 | LOC101927151 | 503.6896648 | 269.1316823 |             |
| 327.6780614  | 558.110501   |             |             |             |
| TCERG1       | TCERG1       | 7683.024445 | 8373.54989  | 6371.418654 |
| 7024.461728  |              |             |             |             |
| NFATC3       | NFATC3       | 17189.87403 | 16810.06644 | 9376.771118 |
| 10785.10833  |              |             |             |             |
| ADCYAP1R1    | ADCYAP1R1    | 0           | 1.015591254 | 0           |
| 0            |              |             |             | 0           |
| SLC28A3      | SLC28A3      | 206.1613512 | 84.29407409 | 104.4641231 |
| 58.45076193  |              |             |             |             |
| WDR87        | WDR87        | 0           | 0           | 0.892855753 |
| 0            |              |             |             | 0           |
| MIER1        | MIER1        | 3324.351788 | 2427.263097 | 4917.849488 |
| 4443.200661  |              |             |             |             |
| COG2         | COG2         | 2561.789063 | 3089.428595 | 2975.888225 |
| 2727.387972  |              |             |             |             |
| VNN2         | VNN2         | 415.8368163 | 277.2564124 | 1203.569555 |
| 905.98681    |              |             |             |             |
| LAMP5        | LAMP5        | 0           | 0           | 9.427542247 |
| 0            |              |             |             |             |
| SLC7A8       | SLC7A8       | 3.51411394  | 26.40537261 | 79.46416202 |
| 32.99639787  |              |             |             |             |
| DCC          | DCC          | 1.171371313 | 0           | 0           |
| 0            |              |             |             |             |
| CTLA4        | CTLA4        | 8661.119492 | 11255.79787 | 3360.709054 |
| 8414.081456  |              |             |             |             |
| CSTA         | CSTA         | 0           | 0           | 3.771016899 |
| 0            |              |             |             |             |
| CTTN         | CTTN         | 131.1935871 | 52.81074521 | 310.7138021 |
| 252.6581322  |              |             |             |             |
| DNAJB5       | DNAJB5       | 349.0686514 | 352.4101652 | 640.1775749 |
| 369.5596561  |              |             |             |             |
| BIRC2        | BIRC2        | 2749.208473 | 1920.483061 | 3208.030721 |
| 3414.655802  |              |             |             |             |
| BIRC3        | BIRC3        | 9855.918231 | 9070.24549  | 9704.44918  |
| 12367.99267  |              |             |             |             |

|             |          |             |             |             |
|-------------|----------|-------------|-------------|-------------|
| DHPS        | DHPS     | 3562.140164 | 4089.78598  | 6088.38338  |
| 4685.488497 |          |             |             |             |
| MX2         | MX2      | 1998.359461 | 1458.389041 | 5220.527588 |
| 3511.759487 |          |             |             |             |
| AGFG1       | AGFG1    | 7314.042481 | 7604.74731  | 7369.631386 |
| 7527.892484 |          |             |             |             |
| C11orf91    | C11orf91 |             | 5.856856567 | 10.15591254 |
| 4.464278765 |          | 1.885508449 |             |             |
| AR          | AR       | 2.342742627 | 1.015591254 | 3.571423012 |
| 0.942754225 |          |             |             |             |
| CDKN1C      | CDKN1C   | 14.05645576 | 5.07795627  | 32.14280711 |
| 20.74059294 |          |             |             |             |
| CD36        | CD36     | 0           | 0           | 11.60712479 |
| ACSL3       | ACSL3    | 3237.67031  | 3607.380134 | 4851.778162 |
| 4409.261509 |          |             |             |             |
| RAPH1       | RAPH1    | 46.85485254 | 38.59246765 | 28.5713841  |
| 162.1537267 |          |             |             |             |
| CTAGE5      | CTAGE5   | 2439.966446 | 2340.937841 | 2806.245632 |
| 2786.781488 |          |             |             |             |
| EEF1D       | EEF1D    | 8264.024616 | 10058.41578 | 11754.44599 |
| 9387.94657  |          |             |             |             |
| NASP        | NASP     | 11188.93879 | 10996.8221  | 7358.024261 |
| 9751.8497   |          |             |             |             |
| TUBD1       | TUBD1    | 814.1030629 | 866.2993397 | 1402.676388 |
| 1055.884732 |          |             |             |             |
| CSRP1       | CSRP1    | 6219.981674 | 7657.558056 | 3322.316257 |
| 4041.587361 |          |             |             |             |
| ENY2        | ENY2     | 4609.346118 | 4777.341259 | 3410.708977 |
| 3949.197447 |          |             |             |             |
| KLRD1       | KLRD1    | 46.85485254 | 266.0849086 | 380.3565508 |
| 64.10728728 |          |             |             |             |
| LGALS1      | LGALS1   | 16843.14812 | 21075.5497  | 3221.423557 |
| 5477.402046 |          |             |             |             |
| RPSA        | RPSA     | 15609.69412 | 18418.76298 | 15180.33351 |
| 15319.75615 |          |             |             |             |
| NPR3        | NPR3     | 0           | 3.046773762 | 0           |
| LY86        | LY86     | 30.45565415 | 29.45214637 | 75.89273901 |
| 19.79783872 |          |             |             |             |
| MED17       | MED17    | 3042.051301 | 3511.914557 | 4360.707498 |
| 4036.87359  |          |             |             |             |
| CHST2       | CHST2    | 1962.04695  | 3357.544686 | 693.7489201 |
| 977.636131  |          |             |             |             |
| FADS2       | FADS2    | 156.963756  | 177.7284695 | 75.89273901 |
| 131.9855915 |          |             |             |             |
| SETMAR      | SETMAR   | 612.6271969 | 823.644507  | 604.4633448 |
| 661.8134658 |          |             |             |             |
| SYNGR3      | SYNGR3   | 878.5284851 | 719.0386079 | 464.2849916 |
| 848.4788022 |          |             |             |             |
| NEURL1      | NEURL1   | 240.1311193 | 40.62365016 | 115.1783921 |
| 236.6313104 |          |             |             |             |

|             |             |             |             |             |
|-------------|-------------|-------------|-------------|-------------|
| RPP38       | RPP38       | 1222.911651 | 1534.558385 | 1816.961457 |
| 1779.919976 |             |             |             |             |
| RPP30       | RPP30       | 2807.777038 | 2928.965177 | 2564.281723 |
| 3072.436018 |             |             |             |             |
| MATN2       | MATN2       | 73.79639275 | 5.07795627  | 8.92855753  |
| 70.70656685 |             |             |             |             |
| SCAMP1      | SCAMP1      | 957.0103631 | 1077.542321 | 1631.247461 |
| 1572.514047 |             |             |             |             |
| CD83        | CD83        | 1179.570913 | 3103.646872 | 4833.921047 |
| 3092.233857 |             |             |             |             |
| HLA-DPB1    | HLA-DPB1    |             | 101.9093043 | 1239.02133  |
| 906.2485893 | 80.1341091  |             |             |             |
| S1PR2       | S1PR2       | 488.4618377 | 257.9601785 | 288.3924082 |
| 390.300249  |             |             |             |             |
| FOXJ3       | FOXJ3       | 3347.779214 | 2339.922249 | 4291.064749 |
| 4705.286336 |             |             |             |             |
| LAMP2       | LAMP2       | 9968.369878 | 11502.58654 | 11226.76824 |
| 9325.724791 |             |             |             |             |
| CTCF        | CTCF        | 4869.39055  | 5350.134726 | 5036.599303 |
| 4507.307948 |             |             |             |             |
| FAM109A     | FAM109A     | 107.7661608 | 110.6994467 | 155.356901  |
| 77.30584643 |             |             |             |             |
| GNE         | GNE         | 1116.316862 | 653.0251764 | 739.2845635 |
| 903.1585473 |             |             |             |             |
| HELQ        | HELQ        | 1097.574921 | 982.0767427 | 1928.568427 |
| 1595.140148 |             |             |             |             |
| GST01       | GST01       | 5955.251758 | 10199.58296 | 5933.026479 |
| 5490.600605 |             |             |             |             |
| LTA         | LTA         | 1.171371313 | 7.109138778 | 1.785711506 |
| 2.828262674 |             |             |             |             |
| FXYD6       | FXYD6       | 0           | 0           | 15.0840676  |
| FANCD20S    | FANCD20S    |             | 183.9052962 | 149.2919143 |
| 84.82129654 | 110.3022443 |             |             |             |
| CD300E      | CD300E      | 0           | 1.785711506 | 0           |
| CCHCR1      | CCHCR1      | 144.0786716 | 79.21611782 | 96.42842133 |
| 77.30584643 |             |             |             |             |
| BZRAP1      | BZRAP1      | 326.8125965 | 159.4478269 | 225.8925055 |
| 136.6993626 |             |             |             |             |
| ATP2A3      | ATP2A3      | 12929.59656 | 7112.185552 | 3241.959239 |
| 4139.633801 |             |             |             |             |
| FAM129C     | FAM129C     | 0           | 4.464278765 | 23.56885562 |
| DSN1        | DSN1        | 3363.007041 | 3744.484954 | 2074.103914 |
| 2437.962425 |             |             |             |             |
| PIGX        | PIGX        | 4968.957112 | 4754.998251 | 2248.210786 |
| 3137.48606  |             |             |             |             |
| PLIN1       | PLIN1       | 0           | 28.5713841  | 12.25580492 |
| PLD3        | PLD3        | 2382.569252 | 2465.855565 | 2853.566987 |
| 2160.792683 |             |             |             |             |
| SHB         | SHB         | 17.5705697  | 28.43655511 | 57.14276819 |
| 42.42394011 |             |             |             |             |

|             |         |             |             |             |
|-------------|---------|-------------|-------------|-------------|
| SRSF3       | SRSF3   | 25354.33208 | 26314.98498 | 22832.10732 |
| 22796.73991 |         |             |             |             |
| RGPD5       | RGPD5   | 214.3609504 | 255.928996  | 320.5352153 |
| 263.0284287 |         |             |             |             |
| CBX3        | CBX3    | 11760.56799 | 13410.88251 | 8857.12907  |
| 12172.84255 |         |             |             |             |
| SEBOX       | SEBOX   | 0           | 2.678567259 | 2.828262674 |
| 0           |         |             |             |             |
| SLC35B3     | SLC35B3 | 974.5809328 | 1127.306292 | 1291.962275 |
| 1127.534053 |         |             |             |             |
| ENTPD4      | ENTPD4  | 3254.069509 | 2323.672789 | 3540.173061 |
| 3624.889994 |         |             |             |             |
| NFASC       | NFASC   | 0           | 0           | 15.0840676  |
| 0           |         |             |             |             |
| ZNF668      | ZNF668  | 1082.347094 | 1536.589567 | 1210.712401 |
| 962.5520634 |         |             |             |             |
| RAB40C      | RAB40C  | 1096.403549 | 1209.569184 | 1217.855247 |
| 1211.439179 |         |             |             |             |
| ZFP62       | ZFP62   | 776.6191808 | 508.8112183 | 1008.034145 |
| 1153.931171 |         |             |             |             |
| PRR29       | PRR29   | 3427.432463 | 5595.90781  | 6051.776294 |
| 4419.631805 |         |             |             |             |
| NE01        | NE01    | 435.7501286 | 233.5859884 | 581.2490952 |
| 452.5220279 |         |             |             |             |
| WDR46       | WDR46   | 387.7239048 | 13.2026863  | 8.92855753  |
| 607.1337207 |         |             |             |             |
| SMOC2       | SMOC2   | 0           | 10.71426904 | 0           |
| 0           |         |             |             |             |
| CMIP        | CMIP    | 52.71170911 | 28.43655511 | 43.7499319  |
| 31.11088942 |         |             |             |             |
| FLNB        | FLNB    | 9641.557281 | 6075.266882 | 2383.924861 |
| 2180.590522 |         |             |             |             |
| KCTD7       | KCTD7   | 1547.381505 | 1211.600366 | 1441.962041 |
| 1303.829093 |         |             |             |             |
| BARX2       | BARX2   | 3.51411394  | 4.062365016 | 0           |
| 0           |         |             |             |             |
| OXA1L       | OXA1L   | 4218.1081   | 4735.702018 | 3910.708198 |
| 3946.369185 |         |             |             |             |
| HDAC9       | HDAC9   | 35.1411394  | 12.18709505 | 232.1424958 |
| 212.1197006 |         |             |             |             |
| FAM213B     | FAM213B | 1988.98849  | 2174.380875 | 1829.461438 |
| 2076.887557 |         |             |             |             |
| CHRN3       | CHRN3   | 2.342742627 | 4.062365016 | 0           |
| 0           |         |             |             |             |
| IFRD2       | IFRD2   | 4985.35631  | 8197.852603 | 0.942754225 |
| 5943.122633 |         |             |             |             |
| DUSP11      | DUSP11  | 3174.416259 | 3943.540839 | 6349.990116 |
| 4167.916427 |         |             |             |             |
| DYRK2       | DYRK2   | 2279.488576 | 1368.001419 | 4088.386493 |
| 3987.850371 |         |             |             |             |
| CDC16       | CDC16   | 2599.272945 | 1938.763704 | 5486.598602 |
| 2184.361539 |         |             |             |             |
| UGT3A2      | UGT3A2  | 9.370970508 | 1.015591254 | 1855.354255 |
| 2.828262674 |         |             |             |             |
| FRS2        | FRS2    | 527.1170911 | 262.0225435 | 16.96425931 |
|             |         |             |             |             |
|             |         |             |             | 739.2845635 |



|                 |               |               |               |   |  |
|-----------------|---------------|---------------|---------------|---|--|
| 1012.518037     |               |               |               |   |  |
| STRN3 STRN3     | 685.2522184   | 437.7198305   | 466.0707031   |   |  |
| 582.6221109     |               |               |               |   |  |
| FOXM1 FOXM1     | 6769.35482    | 5169.359483   | 1441.069185   |   |  |
| 2720.788693     |               |               |               |   |  |
| SLC35E2B        | SLC35E2B      | 3945.178584   | 2176.412057   |   |  |
| 3036.602416     | 3267.586143   |               |               |   |  |
| WDR83 WDR83     | 4384.442826   | 5689.342205   | 5461.598641   |   |  |
| 4836.329173     |               |               |               |   |  |
| SULT1A4 SULT1A4 | 18.74194102   | 6.093547524   | 14.28569205   |   |  |
| 17.91233027     |               |               |               |   |  |
| ANXA2 ANXA2     | 39847.70934   | 61988.64337   | 12816.05148   |   |  |
| 18456.29946     |               |               |               |   |  |
| FCH02 FCH02     | 46.85485254   | 30.46773762   | 129.4640842   |   |  |
| 171.5812689     |               |               |               |   |  |
| NKRF NKRF       | 851.5869449   | 581.9337886   | 760.7131016   |   |  |
| 611.8474918     |               |               |               |   |  |
| GYS1 GYS1       | 5192.689033   | 6620.639385   | 3345.530507   |   |  |
| 3425.968853     |               |               |               |   |  |
| MID1 MID1       | 0 9.140321286 | 0.892855753   | 0             |   |  |
| SYT2 SYT2       | 10.54234182   | 2.031182508   | 0 23.56885562 |   |  |
| POMC POMC       | 119.479874    | 56.87311023   | 187.4997081   |   |  |
| 230.0320308     |               |               |               |   |  |
| SCNN1A SCNN1A   | 11.71371313   | 25.38978135   | 23.21424958   |   |  |
| 4.713771124     |               |               |               |   |  |
| GREB1 GREB1     | 3.51411394    | 17.26505132   | 32.14280711   |   |  |
| 11.3130507      |               |               |               |   |  |
| STRIP1 STRIP1   | 3128.732778   | 3491.602731   | 5174.991945   |   |  |
| 4157.546131     |               |               |               |   |  |
| FARSB FARSB     | 7460.463895   | 10234.11307   | 5975.883555   |   |  |
| 6449.381651     |               |               |               |   |  |
| PIP4K2B PIP4K2B | 2116.667963   | 1261.364338   | 1937.496984   |   |  |
| 2047.662176     |               |               |               |   |  |
| ABCC5 ABCC5     | 1044.863212   | 964.8116913   | 831.2487061   |   |  |
| 850.3643107     |               |               |               |   |  |
| PRSS57 PRSS57   | 0 5.07795627  | 3.571423012   | 0             |   |  |
| KCNMB2 KCNMB2   | 0 0           | 1.785711506   | 0             |   |  |
| MAD1L1 MAD1L1   | 2324.000686   | 3520.039287   | 2765.174267   |   |  |
| 1991.096923     |               |               |               |   |  |
| RPS18 RPS18     | 15.22782708   | 0 3.571423012 | 13.19855915   |   |  |
| LAMB1 LAMB1     | 16.39919839   | 5.07795627    | 24.99996108   |   |  |
| 3.771016899     |               |               |               |   |  |
| CASC11 CASC11   | 3.51411394    | 0 16.96425931 | 1.885508449   |   |  |
| LIPT1 LIPT1     | 195.6190093   | 166.5569657   | 795.5344759   |   |  |
| 565.6525348     |               |               |               |   |  |
| BSCL2 BSCL2     | 2794.891954   | 3496.680688   | 2629.460193   |   |  |
| 2285.236241     |               |               |               |   |  |
| NOL10 NOL10     | 2982.311364   | 3379.887693   | 2675.888692   |   |  |
| 2986.645384     |               |               |               |   |  |
| LINC00511       | LINC00511     | 11.71371313   | 4.062365016   | 0 |  |

|             |         |             |             |             |
|-------------|---------|-------------|-------------|-------------|
| TSN         | TSN     | 8254.653646 | 9986.308801 | 8709.807871 |
| 8094.487773 |         |             |             |             |
| FAM95A      | FAM95A  | 3.51411394  | 0           | 0           |
| SLC43A1     | SLC43A1 | 887.8994556 | 1142.540161 | 685.7132183 |
| 989.891936  |         |             |             |             |
| NFYA        | NFYA    | 2179.922014 | 1857.516404 | 2491.960407 |
| 2294.663783 |         |             |             |             |
| TERT        | TERT    | 160.4778699 | 30.46773762 | 11.60712479 |
| 63.16453306 |         |             |             |             |
| CDCA7       | CDCA7   | 9402.597533 | 7419.909702 | 1374.99786  |
| 3345.834744 |         |             |             |             |
| ZNF655      | ZNF655  | 4986.527681 | 4614.846658 | 5232.134713 |
| 4926.833578 |         |             |             |             |
| IQSEC1      | IQSEC1  | 2865.174233 | 1725.489541 | 1158.926767 |
| 1838.370738 |         |             |             |             |
| JAKMIP1     | JAKMIP1 | 2210.377669 | 1969.231442 | 584.8205182 |
| 1280.260237 |         |             |             |             |
| ISLR2       | ISLR2   | 0           | 10.15591254 | 0           |
| FASTKD2     | FASTKD2 | 3273.982821 | 4544.770862 | 4057.136542 |
| 4415.860789 |         |             |             |             |
| CCDC124     | CCDC124 | 3149.817462 | 4965.225641 | 2758.924277 |
| 2354.057299 |         |             |             |             |
| SUCLG2      | SUCLG2  | 3371.20664  | 3910.026328 | 3302.67343  |
| 4040.644607 |         |             |             |             |
| ZNF549      | ZNF549  | 599.7421125 | 503.733262  | 1320.533659 |
| 1404.703795 |         |             |             |             |
| ALCAM       | ALCAM   | 948.8107639 | 1282.691754 | 1071.426904 |
| 1165.244222 |         |             |             |             |
| PI3         | PI3     | 0           | 1.015591254 | 0           |
| HIVEP3      | HIVEP3  | 2049.899799 | 1458.389041 | 904.4628778 |
| 1341.539262 |         |             |             |             |
| RIC1        | RIC1    | 2503.220497 | 1392.375609 | 978.5699053 |
| 1880.794678 |         |             |             |             |
| WDFY1       | WDFY1   | 5797.11663  | 4578.285373 | 6117.84762  |
| 6841.567409 |         |             |             |             |
| LMBRD2      | LMBRD2  | 1177.22817  | 889.6579385 | 1098.212576 |
| 1052.113715 |         |             |             |             |
| COLQ        | COLQ    | 32.79839678 | 27.42096386 | 99.10698859 |
| 134.8138541 |         |             |             |             |
| RHPN2       | RHPN2   | 29.28428284 | 63.98224901 | 102.6784116 |
| 15.0840676  |         |             |             |             |
| MAGI1       | MAGI1   | 57.39719436 | 41.63924142 | 14.28569205 |
| 16.02682182 |         |             |             |             |
| GBA3        | GBA3    | 1.171371313 | 0           | 6.599279573 |
| MAP3K1      | MAP3K1  | 7686.538559 | 6053.939465 | 8106.237382 |
| 7905.936928 |         |             |             |             |
| SEC11A      | SEC11A  | 6713.128997 | 7183.27694  | 4403.564574 |
| 5018.280738 |         |             |             |             |
| RBM6        | RBM6    | 4077.543542 | 3445.901125 | 4574.992879 |

|             |          |             |             |             |   |
|-------------|----------|-------------|-------------|-------------|---|
| 4901.379214 |          |             |             |             |   |
| ITGB3BP     | ITGB3BP  | 1671.546864 | 1192.304132 | 701.7846219 |   |
| 1214.267441 |          |             |             |             |   |
| CNST        | CNST     | 3601.966789 | 3886.667729 | 5198.206194 |   |
| 3925.628592 |          |             |             |             |   |
| SRA1        | SRA1     | 4649.172743 | 7733.7274   | 4141.957838 |   |
| 3408.999277 |          |             |             |             |   |
| RABGAP1L    | RABGAP1L |             | 4902.188947 | 4008.53868  |   |
| 4710.706953 |          | 5369.928064 |             |             |   |
| RPL14       | RPL14    | 7166.449696 | 6837.975914 | 9809.806159 |   |
| 9387.94657  |          |             |             |             |   |
| ART3        | ART3     | 35.1411394  | 16.24946006 | 13.3928363  |   |
| 46.19495701 |          |             |             |             |   |
| TMEM132C    | TMEM132C |             | 11.71371313 | 0           | 0 |
| ATL2        | ATL2     | 2723.438304 | 2708.581875 | 3215.173567 | 0 |
| 3016.813519 |          |             |             |             |   |
| MLLT10      | MLLT10   | 588.0283994 | 217.3365284 | 634.8204404 |   |
| 510.9727898 |          |             |             |             |   |
| TSEN2       | TSEN2    | 549.373146  | 682.4773227 | 957.1413672 |   |
| 1094.537655 |          |             |             |             |   |
| PACSIN1     | PACSIN1  | 29.28428284 | 26.40537261 | 4.464278765 |   |
| 21.68334717 |          |             |             |             |   |
| TTC8        | TTC8     | 118.3085027 | 132.026863  | 247.3210436 |   |
| 217.7762259 |          |             |             |             |   |
| AFTPH       | AFTPH    | 3234.156196 | 2676.082954 | 2852.674131 |   |
| 3172.367966 |          |             |             |             |   |
| MGST3       | MGST3    | 1659.833151 | 1027.778349 | 2023.211136 |   |
| 2678.364752 |          |             |             |             |   |
| MEOX1       | MEOX1    | 59.73993699 | 301.6306025 | 116.9641036 |   |
| 87.6761429  |          |             |             |             |   |
| TRIM68      | TRIM68   | 1348.248382 | 1573.150853 | 2125.889548 |   |
| 1806.317095 |          |             |             |             |   |
| PTPR0       | PTPR0    | 139.3931863 | 427.563918  | 981.2484726 |   |
| 239.4595731 |          |             |             |             |   |
| SLC39A3     | SLC39A3  | 2386.083366 | 3157.473209 | 2236.603661 |   |
| 1804.431586 |          |             |             |             |   |
| NOP9        | NOP9     | 1561.437961 | 1115.119197 | 1038.391241 |   |
| 1566.857521 |          |             |             |             |   |
| ZBTB7B      | ZBTB7B   | 1917.53484  | 854.1122447 | 433.927896  |   |
| 705.1801601 |          |             |             |             |   |
| DBT         | DBT      | 1180.742284 | 924.1880412 | 1180.355306 |   |
| 1281.202991 |          |             |             |             |   |
| HSPA9       | HSPA9    | 24129.07769 | 29643.07752 | 32881.19882 |   |
| 29739.18202 |          |             |             |             |   |
| CNTN4       | CNTN4    | 0           | 0           | 1.885508449 |   |
| MY05B       | MY05B    | 22.25605496 | 18.28064257 | 13.3928363  |   |
| 15.0840676  |          |             |             |             |   |
| DAXX        | DAXX     | 133.5363297 | 108.6682642 | 91.07128681 |   |
| 159.325464  |          |             |             |             |   |
| MLST8       | MLST8    | 2765.607671 | 3608.395726 | 2378.567726 |   |

|             |             |             |             |             |
|-------------|-------------|-------------|-------------|-------------|
| 2118.368743 |             |             |             |             |
| MGAT5B      | MGAT5B      | 169.8488405 | 132.026863  | 108.0355461 |
| 89.56165135 |             |             |             |             |
| CSAG3       | CSAG3       | 3.51411394  | 4.062365016 | 1.785711506 |
| 1.885508449 |             |             |             |             |
| CCDC42B     | CCDC42B     | 856.2724301 | 1067.386408 | 1011.605568 |
| 1039.85791  |             |             |             |             |
| ZFYVE19     | ZFYVE19     | 1457.185914 | 1918.451879 | 1382.140706 |
| 1549.887945 |             |             |             |             |
| TMPRSS13    | TMPRSS13    |             | 79.65324932 | 39.60805891 |
| 63.39275847 | 81.07686333 |             |             |             |
| INS-IGF2    | INS-IGF2    |             | 0           | 2.031182508 |
|             |             |             |             | 14.28569205 |
| 30.16813519 |             |             |             |             |
| DRP2        | DRP2        | 33.96976809 | 26.40537261 | 30.3570956  |
| 36.76741476 |             |             |             |             |
| CENPL       | CENPL       | 1814.454165 | 1989.543267 | 915.1771469 |
| 1341.539262 |             |             |             |             |
| CX3CR1      | CX3CR1      | 289.3287144 | 539.2789559 | 106.2498346 |
| 37.71016899 |             |             |             |             |
| PDIA6       | PDIA6       | 23411.02707 | 28774.747   | 15822.2968  |
| 20949.88438 |             |             |             |             |
| SPNS1       | SPNS1       | 2675.41208  | 3947.603204 | 3374.994746 |
| 2564.291491 |             |             |             |             |
| CEP63       | CEP63       | 829.3308899 | 775.9117181 | 1214.283824 |
| 1233.122526 |             |             |             |             |
| SNCA        | SNCA        | 73.79639275 | 103.5903079 | 48.21421066 |
| 63.16453306 |             |             |             |             |
| CDHR1       | CDHR1       | 0           | 0           | 0.892855753 |
| GUF1        | GUF1        | 2229.11961  | 2499.370076 | 1725.890171 |
| 1992.039677 |             |             |             |             |
| POLR1A      | POLR1A      | 2055.756655 | 1038.949853 | 1115.176836 |
| 1202.011637 |             |             |             |             |
| DLL3        | DLL3        | 62.08267961 | 67.02902277 | 73.21417175 |
| 30.16813519 |             |             |             |             |
| LGSN        | LGSN        | 0           | 0           | 12.49998054 |
| SETDB1      | SETDB1      | 1732.458173 | 1353.783142 | 1849.99712  |
| 1876.080907 |             |             |             |             |
| MAPRE1      | MAPRE1      | 12598.09848 | 13348.93144 | 8817.843417 |
| 10151.57749 |             |             |             |             |
| COA4        | COA4        | 2496.192269 | 3198.096859 | 2071.425347 |
| 2519.982043 |             |             |             |             |
| PCDHGA4     | PCDHGA4     | 7.028227881 | 14.21827756 | 39.28565313 |
| 12.25580492 |             |             |             |             |
| LSM5        | LSM5        | 5267.656797 | 4659.532674 | 4040.172282 |
| 4211.283122 |             |             |             |             |
| SCAND1      | SCAND1      | 2601.615687 | 3472.306498 | 2832.138449 |
| 2100.456413 |             |             |             |             |
| PSMC3IP     | PSMC3IP     | 1704.345261 | 2173.365284 | 1540.176174 |
| 1552.716208 |             |             |             |             |
| ANKMY1      | ANKMY1      | 230.7601488 | 295.5370549 | 690.1774971 |

|             |          |             |             |             |             |
|-------------|----------|-------------|-------------|-------------|-------------|
| 664.6417284 |          |             |             |             |             |
| KLHL3       | KLHL3    | 108.9375322 | 52.81074521 | 305.3566675 |             |
| 182.8943196 |          |             |             |             |             |
| ZNF227      | ZNF227   | 1557.923847 | 1460.420223 | 1480.354839 |             |
| 1915.676585 |          |             |             |             |             |
| LETM1       | LETM1    | 4547.263439 | 5096.236913 | 2924.995447 |             |
| 3338.29271  |          |             |             |             |             |
| LDOC1       | LDOC1    | 577.4860575 | 375.768764  | 404.4636561 |             |
| 651.4431693 |          |             |             |             |             |
| LPHN2       | LPHN2    | 0           | 0           | 19.79783872 |             |
| KIR2DS4     | KIR2DS4  | 1.171371313 | 0           | 0           | 18.85508449 |
| GPR83       | GPR83    | 8.199599194 | 3.046773762 | 0           | 1.885508449 |
| KIF4A       | KIF4A    | 3737.845861 | 4144.627908 | 1065.176913 |             |
| 1753.522858 |          |             |             |             |             |
| HNRNPC      | HNRNPC   | 48985.57696 | 64927.76446 | 48672.24566 |             |
| 46732.32692 |          |             |             |             |             |
| LAIR1       | LAIR1    | 3749.559574 | 5140.922928 | 1081.248317 |             |
| 1159.587696 |          |             |             |             |             |
| TICAM2      | TICAM2   | 298.6996849 | 353.4257564 | 323.2137826 |             |
| 272.4559709 |          |             |             |             |             |
| C5orf30     | C5orf30  | 1981.960262 | 1675.725569 | 716.0703139 |             |
| 816.4251586 |          |             |             |             |             |
| WDR63       | WDR63    | 46.85485254 | 24.3741901  | 41.07136464 | 0           |
| ZNF383      | ZNF383   | 309.2420268 | 318.8956538 | 899.1057433 |             |
| 668.4127453 |          |             |             |             |             |
| CLDN23      | CLDN23   | 3.51411394  | 0           | 0           | 0           |
| PXDNL       | PXDNL    | 0           | 1.015591254 | 3.571423012 | 5.656525348 |
| TMEM71      | TMEM71   | 1875.365473 | 982.0767427 | 1316.962236 |             |
| 1498.036463 |          |             |             |             |             |
| ZFAND2A     | ZFAND2A  | 986.2946459 | 965.8272826 | 1335.712207 |             |
| 1023.831088 |          |             |             |             |             |
| IFI27L1     | IFI27L1  | 983.9519033 | 545.3725034 | 351.7851667 |             |
| 644.8438897 |          |             |             |             |             |
| GNL3        | GNL3     | 7646.711934 | 8889.470247 | 9388.378243 |             |
| 10166.66156 |          |             |             |             |             |
| RNF168      | RNF168   | 2335.714399 | 1744.785774 | 2539.281762 |             |
| 2283.350732 |          |             |             |             |             |
| CCM2        | CCM2     | 9992.968675 | 13187.45243 | 5331.241701 |             |
| 5481.173062 |          |             |             |             |             |
| C7orf31     | C7orf31  | 188.5907815 | 141.1671843 | 283.9281295 |             |
| 208.3486837 |          |             |             |             |             |
| SLC9B1      | SLC9B1   | 1389.246378 | 1849.391674 | 1161.605335 |             |
| 1045.514435 |          |             |             |             |             |
| FAM160A2    | FAM160A2 |             | 894.9276835 | 526.0762696 |             |
| 943.748531  |          |             |             |             |             |
| MID1IP1     | MID1IP1  | 2345.08537  | 1756.97287  | 2386.603428 |             |
| 1691.301079 |          |             |             |             |             |
| METAP1D     | METAP1D  | 104.2520469 | 137.1048193 | 154.4640453 |             |
| 171.5812689 |          |             |             |             |             |
| RPL13       | RPL13    | 20064.41923 | 28429.44597 | 30649.95229 |             |

|                 |               |       |             |   |             |
|-----------------|---------------|-------|-------------|---|-------------|
| 24033.63345     |               |       |             |   |             |
| LINC01119       | LINC01119     |       | 5.856856567 |   | 8.124730032 |
| 15.1785478      | 2.828262674   |       |             |   |             |
| KIAA0930        | KIAA0930      |       | 347.8972801 |   | 198.0402945 |
| 262.4995914     | 328.0784702   |       |             |   |             |
| PHF21A PHF21A   | 1853.109418   |       | 1460.420223 |   | 1689.283085 |
| 1449.013243     |               |       |             |   |             |
| TDRKH TDRKH     | 1767.599312   |       | 1924.545426 |   | 2460.710455 |
| 2165.506454     |               |       |             |   |             |
| BZRAP1-AS1      | BZRAP1-AS1    |       | 6656.903174 |   | 4848.432647 |
| 3230.352114     | 4257.478079   |       |             |   |             |
| MTA3 MTA3       | 1277.966103   |       | 898.7982598 |   | 1001.784155 |
| 1045.514435     |               |       |             |   |             |
| STMN4 STMN4     | 0 0           |       | 14.28569205 |   | 2.828262674 |
| SS18 SS18       | 8555.696074   |       | 8660.962215 |   | 7861.594905 |
| 8765.728781     |               |       |             |   |             |
| CLEC12A CLEC12A | 1.171371313   |       | 1.015591254 | 0 | 4.713771124 |
| HIST3H2BB       | HIST3H2BB     |       | 19.91331233 |   | 14.21827756 |
| 22.32139383     | 7.542033798   |       |             |   |             |
| HIST4H4 HIST4H4 | 64.42542224   |       | 26.40537261 |   | 88.39271955 |
| 49.96597391     |               |       |             |   |             |
| ADSSL1 ADSSL1   | 17.5705697    |       | 38.59246765 |   | 189.2854196 |
| 110.3022443     |               |       |             |   |             |
| SYS1 SYS1       | 1628.206126   |       | 2099.227122 |   | 2384.817716 |
| 2000.524465     |               |       |             |   |             |
| PTCD2 PTCD2     | 445.1210991   |       | 449.9069255 |   | 408.9279349 |
| 460.0640617     |               |       |             |   |             |
| SCN11A SCN11A   | 9.370970508   |       | 5.07795627  |   | 8.035701777 |
| 2.828262674     |               |       |             |   |             |
| FKRP FKRP       | 778.9619235   |       | 470.2187506 |   | 644.6418537 |
| 446.8655025     |               |       |             |   |             |
| STRN4 STRN4     | 4608.174747   |       | 4587.425695 |   | 3679.458558 |
| 3195.936822     |               |       |             |   |             |
| FAM76A FAM76A   | 504.8610361   |       | 365.6128515 |   | 452.6778668 |
| 527.9423658     |               |       |             |   |             |
| MIR4761 MIR4761 | 825.816776    |       | 1378.157332 |   | 819.6415813 |
| 905.0440557     |               |       |             |   |             |
| MIR4758 MIR4758 | 2.342742627   | 0 0 0 |             |   |             |
| MIR4757 MIR4757 | 0 2.031182508 | 0 0   |             |   |             |
| LINC00332       | LINC00332     | 0     | 5.07795627  |   | 19.64282657 |
|                 | 2.828262674   |       |             |   |             |
| SNX22 SNX22     | 16326.57337   |       | 25409.07759 |   | 15699.97556 |
| 13809.46388     |               |       |             |   |             |
| VPS51 VPS51     | 4983.013567   |       | 6739.463562 |   | 6207.133195 |
| 4960.77273      |               |       |             |   |             |
| PSMA8 PSMA8     | 79.65324932   |       | 57.88870148 |   | 123.2140939 |
| 134.8138541     |               |       |             |   |             |
| SPINK5 SPINK5   | 4.685485254   | 0 0 0 |             |   |             |
| NQ01 NQ01       | 3917.065672   |       | 6101.672254 |   | 1453.569166 |
| 1627.193792     |               |       |             |   |             |

|                                             |             |             |               |
|---------------------------------------------|-------------|-------------|---------------|
| PHACTR4 PHACTR4                             | 2033.5006   | 1939.779295 | 1793.747208   |
| 2032.578108                                 |             |             |               |
| CSK CSK                                     | 9786.807324 | 7541.780653 | 3673.208568   |
| 4521.449262                                 |             |             |               |
| MY07A MY07A                                 | 52.71170911 | 26.40537261 | 41.96422039   |
| 66.93554995                                 |             |             |               |
| TMEM70 TMEM70                               | 3100.619867 | 3320.983401 | 2728.567181   |
| 2517.15378                                  |             |             |               |
| C5orf49 C5orf49                             | 1.171371313 | 2.031182508 | 0 0.942754225 |
| CDC25B CDC25B                               | 7715.822842 | 6283.463089 | 2669.638702   |
| 3046.0389                                   |             |             |               |
| GNA15 GNA15                                 | 2704.696363 | 2906.622169 | 745.5345538   |
| 1318.91316                                  |             |             |               |
| FAM219B FAM219B                             | 1847.252561 | 1543.698706 | 1788.390073   |
| 2088.200608                                 |             |             |               |
| LOC100499489 LOC100499489                   |             | 67.93953618 | 54.84192772   |
| 239.2853418                                 | 217.7762259 |             |               |
| UBAC2-AS1 UBAC2-AS1                         |             | 107.7661608 | 113.7462205   |
| 202.6782559                                 | 188.5508449 |             |               |
| LOC100499484-C90RF174 LOC100499484-C90RF174 |             |             | 118.3085027   |
| 87.34084785                                 | 172.3211603 | 176.29504   |               |
| ZNF226 ZNF226                               | 1014.407557 | 520.9983133 | 1191.96243    |
| 1221.809475                                 |             |             |               |
| G6PD G6PD                                   | 812.9316915 | 224.4456671 | 176.7854391   |
| 177.2377942                                 |             |             |               |
| ABI1 ABI1                                   | 12454.0198  | 10583.47646 | 9222.307073   |
| 11161.26727                                 |             |             |               |
| ZIC4 ZIC4                                   | 0 0         | 1.785711506 | 2.828262674   |
| SMG7 SMG7                                   | 6778.725791 | 5545.128247 | 3683.922837   |
| 4867.440062                                 |             |             |               |
| OSBPL10 OSBPL10                             | 173.3629544 | 138.1204106 | 176.7854391   |
| 65.05004151                                 |             |             |               |
| CENPO CENPO                                 | 3230.642083 | 2874.123249 | 1242.855208   |
| 1523.490827                                 |             |             |               |
| ADORA2A ADORA2A                             | 2654.327396 | 3021.383981 | 2954.459687   |
| 3596.607367                                 |             |             |               |
| ADH5 ADH5                                   | 7162.935582 | 7492.016681 | 5193.741915   |
| 5526.425265                                 |             |             |               |
| MTHFSD MTHFSD                               | 1063.605153 | 1019.653619 | 1056.248356   |
| 983.2926564                                 |             |             |               |
| RNF103 RNF103                               | 1136.230174 | 1121.212744 | 1665.175979   |
| 1466.925574                                 |             |             |               |
| LTBP2 LTBP2                                 | 14.05645576 | 6.093547524 | 39.28565313   |
| 12.25580492                                 |             |             |               |
| CLEC3B CLEC3B                               | 1.171371313 | 6.093547524 | 10.71426904   |
| 8.484788022                                 |             |             |               |
| AURKC AURKC                                 | 9.370970508 | 22.34300759 | 8.92855753    |
| 23.56885562                                 |             |             |               |
| GAB1 GAB1                                   | 9.370970508 | 3.046773762 | 0 15.0840676  |
| ATP6V0E1 ATP6V0E1                           |             | 8006.322927 | 10736.83074   |

|                           |             |             |             |             |  |
|---------------------------|-------------|-------------|-------------|-------------|--|
| 10745.51899               | 9378.519027 |             |             |             |  |
| OPN1MW OPN1MW             | 0           | 3.046773762 | 0           | 0           |  |
| KITLG KITLG               | 4.685485254 | 8.124730032 | 60.71419121 | 0           |  |
| ZNF202 ZNF202             | 844.558717  | 918.0944937 | 1623.211759 |             |  |
| 1265.17617                |             |             |             |             |  |
| MYOT MYOT                 | 43.3407386  | 33.51451138 | 21.42853807 |             |  |
| 29.22538097               |             |             |             |             |  |
| TRAF5 TRAF5               | 4426.612194 | 2791.860357 | 2084.818183 |             |  |
| 3548.526902               |             |             |             |             |  |
| RAPGEF6 RAPGEF6           | 5389.479413 | 3065.054405 | 5794.633837 |             |  |
| 6858.536985               |             |             |             |             |  |
| C6orf47 C6orf47           | 0           | 1.015591254 | 0           | 0           |  |
| MIR4435-1HG MIR4435-1HG   |             | 4997.070023 | 2319.610424 |             |  |
| 442.8564535               | 1607.395953 |             |             |             |  |
| TTC26 TTC26               | 713.3651299 | 682.4773227 | 512.4992022 |             |  |
| 677.8402876               |             |             |             |             |  |
| FBLL1 FBLL1               | 5.856856567 | 1.015591254 | 0           | 0           |  |
| LINC01135 LINC01135       |             | 8.199599194 | 11.17150379 |             |  |
| 33.92851862               | 16.96957604 |             |             |             |  |
| PPP4R1L PPP4R1L           | 377.1815629 | 425.5327354 | 403.5708004 |             |  |
| 219.6617344               |             |             |             |             |  |
| PRRT4 PRRT4               | 4.685485254 | 0           | 2.678567259 | 1.885508449 |  |
| SPTAN1 SPTAN1             | 16587.78917 | 8352.222473 | 8073.201719 |             |  |
| 10993.45701               |             |             |             |             |  |
| C2orf74 C2orf74           | 645.4255937 | 597.1676574 | 672.320382  |             |  |
| 821.1389297               |             |             |             |             |  |
| CAMK2G CAMK2G             | 364.2964785 | 170.6193307 | 341.9637534 |             |  |
| 348.8190631               |             |             |             |             |  |
| CAMK2D CAMK2D             | 3305.609847 | 1879.859411 | 2172.318047 |             |  |
| 3194.051313               |             |             |             |             |  |
| MXD1 MXD1                 | 1671.546864 | 1054.183722 | 867.8557919 |             |  |
| 1121.877527               |             |             |             |             |  |
| M6PR M6PR                 | 9080.470422 | 11678.28383 | 13862.47842 |             |  |
| 12987.3822                |             |             |             |             |  |
| EPCAM EPCAM               | 0           | 8.124730032 | 16.96425931 | 7.542033798 |  |
| SH2D1A SH2D1A             | 11622.34617 | 10247.31575 | 5339.277403 |             |  |
| 6516.317201               |             |             |             |             |  |
| LYN LYN                   | 262.3871742 | 210.2273896 | 133.0355072 |             |  |
| 242.2878358               |             |             |             |             |  |
| GTF2B GTF2B               | 3665.22084  | 4118.222535 | 4505.35013  |             |  |
| 3908.659016               |             |             |             |             |  |
| CDK7 CDK7                 | 2854.631891 | 3841.981714 | 2541.960329 |             |  |
| 2387.053697               |             |             |             |             |  |
| CENPB CENPB               | 243.6452332 | 90.38762161 | 138.3926417 |             |  |
| 123.5008034               |             |             |             |             |  |
| TGM4 TGM4                 | 4.685485254 | 1.015591254 | 0           | 3.771016899 |  |
| GHITM GHITM               | 25827.56609 | 36022.00619 | 30395.4884  |             |  |
| 25366.68792               |             |             |             |             |  |
| GPR64 GPR64               | 1.171371313 | 0           | 6.249990271 | 6.599279573 |  |
| TRIM6-TRIM34 TRIM6-TRIM34 |             | 993.3228738 | 976.9987864 |             |  |



|                 |               |               |               |  |
|-----------------|---------------|---------------|---------------|--|
| 1051.784077     | 1117.163756   |               |               |  |
| DDX11L2 DDX11L2 | 42.16936728   | 153.3542794   | 125.8926612   |  |
| 20.74059294     |               |               |               |  |
| MCRS1 MCRS1     | 5609.69722    | 6657.20067    | 5107.134907   |  |
| 4050.072149     |               |               |               |  |
| CDK5RAP1        | CDK5RAP1      | 2818.31938    | 3828.779028   |  |
| 2927.674014     | 3382.602158   |               |               |  |
| DNAJB14 DNAJB14 | 2408.33942    | 1755.957278   | 2338.389217   |  |
| 2773.582929     |               |               |               |  |
| TXNRD2 TXNRD2   | 1493.498425   | 1494.950326   | 915.1771469   |  |
| 1131.30507      |               |               |               |  |
| NPIPA8 NPIPA8   | 0 0           | 0.892855753   | 2.828262674   |  |
| PLOD1 PLOD1     | 1753.542856   | 1675.725569   | 743.7488423   |  |
| 882.4179543     |               |               |               |  |
| SYNJ2BP-COX16   | SYNJ2BP-COX16 | 3074.849698   | 3084.350639   |  |
| 2727.674326     | 2711.36115    |               |               |  |
| SNORD18B        | SNORD18B      | 8.199599194   | 7.109138778   |  |
| 7.142846024     | 1.885508449   |               |               |  |
| SNORD18A        | SNORD18A      | 2.342742627   | 2.031182508   |  |
| 23.21424958     | 20.74059294   |               |               |  |
| SNORD16 SNORD16 | 24.59879758   | 32.49892013   | 46.42849916   |  |
| 47.13771124     |               |               |               |  |
| ZFAT-AS1        | ZFAT-AS1      | 35.1411394    | 30.46773762   |  |
| 32.14280711     | 53.73699081   |               |               |  |
| ARGFXP2 ARGFXP2 | 10.54234182   | 6.093547524   | 8.035701777   |  |
| 6.599279573     |               |               |               |  |
| DPRXP4 DPRXP4   | 1.171371313   | 0 0           | 2.828262674   |  |
| CYP4V2 CYP4V2   | 1690.288805   | 1090.745007   | 1148.212498   |  |
| 1820.458408     |               |               |               |  |
| MRPL42P5        | MRPL42P5      | 127.6794732   | 66.01343151   |  |
| 81.24987353     | 118.7870323   |               |               |  |
| UBE3B UBE3B     | 3790.55757    | 4010.569862   | 3172.316491   |  |
| 3394.857963     |               |               |               |  |
| SPOCD1 SPOCD1   | 0 0           | 2.678567259   | 0             |  |
| YAP1 YAP1       | 0 1.015591254 | 0.892855753   | 0             |  |
| FTH1P3 FTH1P3   | 15.22782708   | 15.23386881   | 1.785711506   |  |
| 15.0840676      |               |               |               |  |
| HCG26 HCG26     | 19.91331233   | 7.109138778   | 13.3928363    |  |
| 28.28262674     |               |               |               |  |
| FAM83A FAM83A   | 0 0           | 0 1.885508449 |               |  |
| FAM98B FAM98B   | 199.1331233   | 184.8376082   | 146.4283435   |  |
| 215.8907175     |               |               |               |  |
| PIR PIR         | 619.6554248   | 680.4461402   | 158.0354683   |  |
| 154.6116929     |               |               |               |  |
| ERI2 ERI2       | 1253.367305   | 983.0923339   | 593.7490758   |  |
| 823.0244382     |               |               |               |  |
| MSM01 MSM01     | 2595.758831   | 2854.827015   | 3596.422973   |  |
| 4172.630199     |               |               |               |  |
| CCDC3 CCDC3     | 9.370970508   | 8.124730032   | 0 8.484788022 |  |
| ZMIZ2 ZMIZ2     | 3404.005037   | 1687.912664   | 1916.068446   |  |

|              |              |             |             |             |             |
|--------------|--------------|-------------|-------------|-------------|-------------|
| 2278.636961  |              |             |             |             |             |
| WNT16        | WNT16        | 7.028227881 | 3.046773762 | 10.71426904 |             |
| 1.885508449  |              |             |             |             |             |
| EID2         | EID2         | 1180.742284 | 1126.290701 | 1737.497295 |             |
| 985.1781648  |              |             |             |             |             |
| TRIM56       | TRIM56       | 1985.474376 | 1748.848139 | 2679.460115 |             |
| 2450.21823   |              |             |             |             |             |
| DDAH1        | DDAH1        | 1.171371313 | 1.015591254 | 7.142846024 | 0           |
| CD200R1      | CD200R1      | 939.4397934 | 610.3703437 | 1616.068913 |             |
| 1778.977222  |              |             |             |             |             |
| NEK5         | NEK5         | 0           | 0           | 0.892855753 | 0           |
| MARK2        | MARK2        | 4240.364155 | 4477.741839 | 3675.887135 |             |
| 3468.392793  |              |             |             |             |             |
| FBXL17       | FBXL17       | 346.7259088 | 197.0247033 | 338.3923304 |             |
| 307.3378773  |              |             |             |             |             |
| SLAMF9       | SLAMF9       | 0           | 0           | 17.85711506 | 0           |
| POMT1        | POMT1        | 2924.91417  | 3437.776395 | 1885.71135  |             |
| 2022.207812  |              |             |             |             |             |
| UCK1         | UCK1         | 2195.149841 | 2250.550219 | 1683.92595  |             |
| 1825.172179  |              |             |             |             |             |
| SUV39H2      | SUV39H2      | 1767.599312 | 1688.928255 | 812.4987353 |             |
| 1189.755832  |              |             |             |             |             |
| LGALS4       | LGALS4       | 7.028227881 | 1.015591254 | 38.39279738 |             |
| 14.14131337  |              |             |             |             |             |
| RNF170       | RNF170       | 1233.453993 | 1243.083695 | 949.1056655 |             |
| 1214.267441  |              |             |             |             |             |
| PHF8         | PHF8         | 3987.347951 | 3196.065676 | 3649.994318 |             |
| 3530.614572  |              |             |             |             |             |
| FBXL20       | FBXL20       | 831.6736326 | 596.1520661 | 1103.569711 |             |
| 869.2193952  |              |             |             |             |             |
| EYS          | EYS          | 5.856856567 | 2.031182508 | 9.821413283 |             |
| 16.02682182  |              |             |             |             |             |
| NHLRC1       | NHLRC1       | 14.05645576 | 17.26505132 | 16.96425931 |             |
| 84.84788022  |              |             |             |             |             |
| SLC24A1      | SLC24A1      | 199.1331233 | 103.5903079 | 204.4639674 |             |
| 298.8530892  |              |             |             |             |             |
| TLX2         | TLX2         | 51.54033779 | 129.9956805 | 33.03566286 |             |
| 11.3130507   |              |             |             |             |             |
| PCNT         | PCNT         | 4662.057828 | 3620.582821 | 3442.851784 |             |
| 2684.964032  |              |             |             |             |             |
| LOC100505812 | LOC100505812 |             | 1076.490237 | 769.8181706 |             |
| 525.8920385  | 429.8959265  |             |             |             |             |
| HCG25        | HCG25        | 5.856856567 | 0           | 0           | 16.96957604 |
| NRARP        | NRARP        | 25.7701689  | 32.49892013 | 18.74997081 |             |
| 26.39711829  |              |             |             |             |             |
| FGFRL1       | FGFRL1       | 429.893272  | 254.9134048 | 450.8921553 |             |
| 446.8655025  |              |             |             |             |             |
| HGF          | HGF          | 0           | 0           | 0.892855753 | 3.771016899 |
| UMODL1       | UMODL1       | 17.5705697  | 11.17150379 | 16.07140355 |             |
| 3.771016899  |              |             |             |             |             |

|               |               |             |   |             |             |             |
|---------------|---------------|-------------|---|-------------|-------------|-------------|
| TMC5          | TMC5          | 0           | 0 | 4.464278765 | 0           |             |
| PAPD5         | PAPD5         | 1222.911651 |   | 644.9004463 | 955.3556557 |             |
| 1121.877527   |               |             |   |             |             |             |
| ZKSCAN1       | ZKSCAN1       | 4413.727109 |   | 4643.283214 | 5235.706136 |             |
| 5120.098194   |               |             |   |             |             |             |
| GALK2         | GALK2         | 1884.736443 |   | 2301.329782 | 1424.104926 |             |
| 1848.741035   |               |             |   |             |             |             |
| FAM86A        | FAM86A        | 1873.02273  |   | 2946.230228 | 1983.925483 |             |
| 2241.869546   |               |             |   |             |             |             |
| ZIM2          | ZIM2          | 0           | 0 | 2.678567259 | 1.885508449 |             |
| MFSD6         | MFSD6         | 5553.471397 |   | 5685.27984  | 4499.10014  |             |
| 4395.120196   |               |             |   |             |             |             |
| ROPN1L-AS1    | ROPN1L-AS1    | 0           |   | 4.062365016 | 2.678567259 |             |
| 0             |               |             |   |             |             |             |
| LINC01024     | LINC01024     | 40.99799597 |   | 79.21611782 |             |             |
| 324.9994941   | 108.4167358   |             |   |             |             |             |
| LINC00568     | LINC00568     | 0           |   | 5.07795627  | 22.32139383 |             |
| 10.37029647   |               |             |   |             |             |             |
| HLTF-AS1      | HLTF-AS1      | 178.0484396 |   | 138.1204106 |             |             |
| 191.9639869   | 180.0660569   |             |   |             |             |             |
| SNX17         | SNX17         | 12778.48966 |   | 16618.11969 | 11717.8389  |             |
| 11285.71082   |               |             |   |             |             |             |
| AN07          | AN07          | 2.342742627 |   | 22.34300759 | 32.14280711 |             |
| 8.484788022   |               |             |   |             |             |             |
| DHRS3         | DHRS3         | 1293.19393  |   | 2637.490487 | 3113.388011 |             |
| 1613.995233   |               |             |   |             |             |             |
| LOC100134868  | LOC100134868  | 44.51210991 |   | 78.20052656 |             |             |
| 30.3570956    | 48.08046546   |             |   |             |             |             |
| DHRS4L1       | DHRS4L1       | 81.99599194 |   | 129.9956805 | 117.8569594 |             |
| 84.84788022   |               |             |   |             |             |             |
| CCNT1         | CCNT1         | 1213.540681 |   | 628.6509863 | 868.7486477 |             |
| 1272.718203   |               |             |   |             |             |             |
| CKS1B         | CKS1B         | 4440.668649 |   | 4899.21221  | 3069.638079 |             |
| 3816.269102   |               |             |   |             |             |             |
| LINC01420     | LINC01420     | 1605.950071 |   | 1914.389514 |             |             |
| 3188.387894   | 2508.668992   |             |   |             |             |             |
| GGT3P         | GGT3P         | 1.171371313 |   | 3.046773762 | 0.892855753 | 0           |
| LOC389834     | LOC389834     | 339.6976809 |   | 270.1472736 |             |             |
| 238.3924861   | 393.1285117   |             |   |             |             |             |
| ZNF670-ZNF695 | ZNF670-ZNF695 | 65.59679355 |   | 49.76397145 |             |             |
| 74.1070275    | 53.73699081   |             |   |             |             |             |
| ARL17A        | ARL17A        | 289.3287144 |   | 226.4768497 | 319.6423596 |             |
| 399.7277913   |               |             |   |             |             |             |
| FAM195B       | FAM195B       | 2053.413912 |   | 2483.120616 | 1651.783143 |             |
| 1623.422775   |               |             |   |             |             |             |
| DHRS9         | DHRS9         | 1.171371313 | 0 | 14.28569205 | 16.02682182 |             |
| SQSTM1        | SQSTM1        | 18097.68679 |   | 27862.74605 | 65566.86222 |             |
| 36747.61693   |               |             |   |             |             |             |
| FAM198A       | FAM198A       | 10.54234182 |   | 1.015591254 | 0           | 10.37029647 |
| ACPP          | ACPP          | 3.51411394  |   | 2.031182508 | 137.499786  |             |

|             |            |             |             |             |
|-------------|------------|-------------|-------------|-------------|
| 2.828262674 |            |             |             |             |
| RDM1        | RDM1       | 209.6754651 | 125.9333155 | 39.28565313 |
| 91.4471598  |            |             |             |             |
| COL4A3BP    | COL4A3BP   |             | 2046.385685 | 2020.011004 |
| 2315.174968 |            | 2066.517261 |             |             |
| RGL1        | RGL1       | 1347.07701  | 917.0789024 | 633.0347289 |
| 526.9996116 |            |             |             |             |
| MTCH1       | MTCH1      | 8030.921725 | 8627.447703 | 7054.453305 |
| 6543.657074 |            |             |             |             |
| GPI         | GPI        | 28413.95395 | 38252.24458 | 16379.43879 |
| 22083.07496 |            |             |             |             |
| GP1BA       | GP1BA      | 9.370970508 | 2.031182508 | 17.85711506 |
| 8.484788022 |            |             |             |             |
| TRIM69      | TRIM69     | 454.4920696 | 682.4773227 | 463.3921358 |
| 379.9299526 |            |             |             |             |
| ZNRF3       | ZNRF3      | 4.685485254 | 12.18709505 | 63.39275847 |
| 64.10728728 |            |             |             |             |
| ZNF30       | ZNF30      | 292.8428284 | 256.9445873 | 738.3917078 |
| 613.7330003 |            |             |             |             |
| HMG2P46     | HMG2P46    |             | 21.08468364 | 22.34300759 |
| 16.96425931 |            | 19.79783872 |             |             |
| CALHM2      | CALHM2     | 2763.264928 | 3547.46025  | 1010.712712 |
| 1372.650151 |            |             |             |             |
| DMTF1       | DMTF1      | 3057.279128 | 2427.263097 | 5594.634148 |
| 4726.969683 |            |             |             |             |
| MPP2        | MPP2       | 5.856856567 | 54.84192772 | 236.6067746 |
| 258.3146576 |            |             |             |             |
| DNMBP-AS1   | DNMBP-AS1  |             | 42.16936728 | 46.71719769 |
| 66.96418148 |            | 54.67974503 |             |             |
| OSBP2       | OSBP2      | 577.4860575 | 364.5972602 | 188.3925639 |
| 286.5972843 |            |             |             |             |
| ZFX         | ZFX        | 2431.766847 | 3047.789353 | 4155.350675 |
| 2803.751064 |            |             |             |             |
| EXT2        | EXT2       | 3047.908158 | 4550.864409 | 3226.780691 |
| 3025.298307 |            |             |             |             |
| SYCP3       | SYCP3      | 249.5020898 | 107.6526729 | 89.2855753  |
| 210.2341921 |            |             |             |             |
| CKLF-CMTM1  | CKLF-CMTM1 |             | 4970.128483 | 4355.870889 |
| 1977.675493 |            | 3045.096146 |             |             |
| RBBP6       | RBBP6      | 4512.122299 | 2855.842606 | 4319.636133 |
| 3951.082956 |            |             |             |             |
| SNORA62     | SNORA62    | 43.3407386  | 26.40537261 | 53.57134518 |
| 38.65292321 |            |             |             |             |
| KIZ         | KIZ        | 554.0586313 | 592.0897011 | 1116.069691 |
| 967.2658346 |            |             |             |             |
| LAMA1       | LAMA1      | 3.51411394  | 0           | 3.771016899 |
| GNB5        | GNB5       | 1817.968278 | 2000.71477  | 2251.782209 |
| 2480.386365 |            |             |             |             |
| MTUS2       | MTUS2      | 0           | 8.035701777 | 6.599279573 |
| DLGAP1      | DLGAP1     | 21.08468364 | 5.07795627  | 2.678567259 |

|             |             |             |             |             |           |
|-------------|-------------|-------------|-------------|-------------|-----------|
| 31.11088942 |             |             |             |             |           |
| WNT7A       | WNT7A       | 1.171371313 | 0           | 81.24987353 | 83.905126 |
| TTC4        | TTC4        | 2812.462524 | 3669.331201 | 2643.745885 |           |
| 2898.969241 |             |             |             |             |           |
| TAF7        | TAF7        | 5674.122642 | 5526.847605 | 9923.198839 |           |
| 8041.693537 |             |             |             |             |           |
| GADD45G     | GADD45G     | 741.4780414 | 1188.241767 | 644.6418537 |           |
| 494.0032138 |             |             |             |             |           |
| JTB         | JTB         | 10648.93661 | 14207.10605 | 11937.48142 |           |
| 10761.53948 |             |             |             |             |           |
| EIF2D       | EIF2D       | 3100.619867 | 3990.258037 | 2676.781548 |           |
| 2479.443611 |             |             |             |             |           |
| RAB1A       | RAB1A       | 6428.485768 | 7854.582759 | 6266.061675 |           |
| 5912.011743 |             |             |             |             |           |
| C1orf61     | C1orf61     | 16.39919839 | 4.062365016 | 58.03562395 |           |
| 25.45436407 |             |             |             |             |           |
| NUP62CL     | NUP62CL     | 57.39719436 | 71.09138778 | 75.89273901 |           |
| 69.76381263 |             |             |             |             |           |
| TMEM108     | TMEM108     | 10.54234182 | 7.109138778 | 16.07140355 |           |
| 10.37029647 |             |             |             |             |           |
| MTMR8       | MTMR8       | 298.6996849 | 233.5859884 | 387.4993968 |           |
| 349.7618174 |             |             |             |             |           |
| CUEDC2      | CUEDC2      | 3712.075692 | 4745.85793  | 3342.851939 |           |
| 3105.432416 |             |             |             |             |           |
| DDRGK1      | DDRGK1      | 2543.047122 | 3634.801098 | 2771.424257 |           |
| 2203.216623 |             |             |             |             |           |
| C7orf49     | C7orf49     | 2321.657943 | 3177.785034 | 2507.138955 |           |
| 2735.87276  |             |             |             |             |           |
| DLK2        | DLK2        | 67.93953618 | 52.81074521 | 183.9282851 |           |
| 72.5920753  |             |             |             |             |           |
| C17orf53    | C17orf53    |             | 1224.083023 | 1813.84598  |           |
| 690.1774971 | 698.5808805 |             |             |             |           |
| CDHR2       | CDHR2       | 8.199599194 | 9.140321286 | 26.78567259 |           |
| 2.828262674 |             |             |             |             |           |
| YIPF2       | YIPF2       | 591.5425133 | 664.1966801 | 607.1419121 |           |
| 654.271432  |             |             |             |             |           |
| TRPM6       | TRPM6       | 0           | 0           | 3.771016899 |           |
| BMS1P5      | BMS1P5      | 1.171371313 | 4.062365016 | 12.49998054 |           |
| 23.56885562 |             |             |             |             |           |
| SNORD71     | SNORD71     | 5.856856567 | 4.062365016 | 6.249990271 |           |
| 2.828262674 |             |             |             |             |           |
| SNORA20     | SNORA20     | 16.39919839 | 7.109138778 | 24.99996108 |           |
| 27.33987252 |             |             |             |             |           |
| SNORD70     | SNORD70     | 9.370970508 | 9.140321286 | 8.92855753  |           |
| 9.427542247 |             |             |             |             |           |
| SNORD69     | SNORD69     | 12.88508445 | 10.15591254 | 24.10710533 |           |
| 18.85508449 |             |             |             |             |           |
| SLC22A17    | SLC22A17    |             | 63.25405093 | 23.35859884 |           |
| 205.3568232 | 159.325464  |             |             |             |           |
| MRGBP       | MRGBP       | 1205.341082 | 1611.74332  | 1332.140784 |           |

|             |             |             |             |             |
|-------------|-------------|-------------|-------------|-------------|
| 1293.458796 |             |             |             |             |
| ATP8B2      | ATP8B2      | 4502.751329 | 2690.301232 | 2356.246332 |
| 2227.728233 |             |             |             |             |
| HPSE2       | HPSE2       | 1.171371313 | 0           | 0           |
| NCALD       | NCALD       | 3382.920353 | 2568.430281 | 889.28433   |
| 1871.367136 |             |             |             |             |
| UBE4B       | UBE4B       | 2193.97847  | 1368.001419 | 1280.35515  |
| 1361.3371   |             |             |             |             |
| UBAP1       | UBAP1       | 4437.154535 | 4540.708497 | 4347.314662 |
| 3847.379991 |             |             |             |             |
| ENTPD1      | ENTPD1      | 6610.048322 | 9825.845383 | 1844.639986 |
| 2825.434411 |             |             |             |             |
| JSRP1       | JSRP1       | 5.856856567 | 6.093547524 | 7.142846024 |
| 18.85508449 |             |             |             |             |
| ATP6V0B     | ATP6V0B     | 8900.07924  | 12102.80097 | 8326.772753 |
| 6332.480127 |             |             |             |             |
| RTN4RL2     | RTN4RL2     | 3.51411394  | 2.031182508 | 8.92855753  |
| 4.713771124 |             |             |             |             |
| RTN4RL1     | RTN4RL1     | 39.82662466 | 24.3741901  | 111.6069691 |
| 48.08046546 |             |             |             |             |
| ZDHHC21     | ZDHHC21     | 801.2179784 | 633.7289425 | 389.2851083 |
| 697.6381263 |             |             |             |             |
| NRBP2       | NRBP2       | 187.4194102 | 96.48116913 | 188.3925639 |
| 265.8566914 |             |             |             |             |
| PRMT3       | PRMT3       | 2660.184253 | 2743.111977 | 2365.17489  |
| 2782.067717 |             |             |             |             |
| ZNF182      | ZNF182      | 625.5122814 | 566.6999198 | 1637.497451 |
| 1438.642947 |             |             |             |             |
| LOC286190   | LOC286190   |             | 399.4376179 | 422.4859617 |
| 558.0348456 | 538.3126623 |             |             |             |
| PSORS1C1    | PSORS1C1    |             | 0           | 0           |
| CTAGE10P    | CTAGE10P    |             | 0           | 0           |
| C1QTNF1     | C1QTNF1     | 0           | 0           | 0           |
| C11orf74    | C11orf74    | 0           | 9.427542247 | 1.885508449 |
| 46.42849916 | 48.08046546 |             | 60.9113083  | 17.26505132 |
| TP53        | TP53        | 4405.52751  | 3531.21079  | 3765.172711 |
| 4024.617785 |             |             |             |             |
| TPD52       | TPD52       | 1870.679988 | 2016.964231 | 1750.890132 |
| 2308.805096 |             |             |             |             |
| C14orf2     | C14orf2     | 7184.020265 | 7675.838698 | 5758.026751 |
| 5835.648651 |             |             |             |             |
| PGPEP1L     | PGPEP1L     | 0           | 0           | 0           |
| XRCC5       | XRCC5       | 40927.71369 | 52433.96086 | 32862.44885 |
| 37814.81471 |             |             |             |             |
| CA14        | CA14        | 23.42742627 | 12.18709505 | 13.3928363  |
| 32.05364364 |             |             |             |             |
| COLGALT2    | COLGALT2    |             | 98.39519033 | 77.18493531 |
| 67.85703723 | 72.5920753  |             |             |             |
| SYNP02      | SYNP02      | 43.3407386  | 18.28064257 | 120.5355267 |
| 125.3863119 |             |             |             |             |

|               |               |             |             |             |
|---------------|---------------|-------------|-------------|-------------|
| SETD4         | SETD4         | 612.6271969 | 733.2568854 | 1112.498268 |
| 964.4375719   |               |             |             |             |
| ZCCHC17       | ZCCHC17       | 2218.577268 | 2666.942633 | 2213.389412 |
| 2210.758657   |               |             |             |             |
| TMEM178A      | TMEM178A      | 0           | 0           | 0           |
|               |               |             |             | 1.885508449 |
| PQLC3         | PQLC3         | 2518.448324 | 1834.157805 | 2657.138721 |
| 3639.974062   |               |             |             |             |
| AHSA2         | AHSA2         | 916.0123671 | 248.8198572 | 603.570489  |
| 770.2302016   |               |             |             |             |
| PDCL2         | PDCL2         | 0           | 1.015591254 | 0.892855753 |
|               |               |             |             | 0           |
| CCDC86        | CCDC86        | 2428.252733 | 5238.419688 | 2493.746118 |
| 2577.49005    |               |             |             |             |
| TAF1A         | TAF1A         | 417.0081876 | 552.4816422 | 559.8205572 |
| 662.75622     |               |             |             |             |
| TRAPPC6A      | TRAPPC6A      |             | 1051.891439 | 1911.34274  |
| 1753.568699   |               | 1447.127735 |             |             |
| PTGES3        | PTGES3        | 18053.17468 | 20848.05726 | 19872.2905  |
| 20316.35354   |               |             |             |             |
| LDLR          | LDLR          | 3495.371999 | 3215.36191  | 4427.671679 |
| 5330.332387   |               |             |             |             |
| SLC02B1       | SLC02B1       | 53.88308042 | 33.51451138 | 0           |
|               |               |             |             | 10.37029647 |
| STON1         | STON1         | 94.88107639 | 105.6214904 | 0           |
|               |               |             |             | 64.10728728 |
| STON1-GTF2A1L | STON1-GTF2A1L |             | 51.54033779 | 60.93547524 |
|               |               | 18.85508449 |             | 0           |
| FAT2          | FAT2          | 12.88508445 | 4.062365016 | 0           |
|               |               |             |             | 2.828262674 |
| TRAF1         | TRAF1         | 13495.3689  | 19896.44826 | 15107.11934 |
| 15151.9459    |               |             |             |             |
| HERC6         | HERC6         | 4416.069852 | 4596.566016 | 9416.949627 |
| 7377.994563   |               |             |             |             |
| GSTZ1         | GSTZ1         | 618.4840535 | 783.0208569 | 274.9995719 |
| 383.7009695   |               |             |             |             |
| CHD9          | CHD9          | 933.5829368 | 760.6778493 | 1383.033561 |
| 1407.532058   |               |             |             |             |
| ABCC11        | ABCC11        | 1.171371313 | 0           | 4.464278765 |
|               |               |             |             | 30.16813519 |
| KDELR2        | KDELR2        | 6095.816315 | 7999.812308 | 6444.632825 |
| 5542.452087   |               |             |             |             |
| PDE11A        | PDE11A        | 0           | 0           | 0           |
|               |               |             |             | 0.942754225 |
| SERPINE3      | SERPINE3      |             | 5.856856567 | 0           |
| 0.942754225   |               |             |             | 0           |
| SMIM13        | SMIM13        | 841.0446031 | 584.9805623 | 490.1778084 |
| 549.625713    |               |             |             |             |
| SLC5A9        | SLC5A9        | 0           | 0           | 5.357134518 |
|               |               |             |             | 0           |
| ZBTB10        | ZBTB10        | 30.45565415 | 11.17150379 | 376.7851278 |
| 472.3198666   |               |             |             |             |
| CMTM1         | CMTM1         | 155.7923847 | 121.8709505 | 47.32135491 |
| 82.01961755   |               |             |             |             |
| XKR7          | XKR7          | 0           | 1.015591254 | 0           |
|               |               |             |             | 0           |
| HAUS8         | HAUS8         | 1860.137646 | 2278.986774 | 1449.997743 |
| 1524.433581   |               |             |             |             |
| TLE3          | TLE3          | 2578.188261 | 1668.61643  | 1579.461827 |

|                 |                 |             |             |  |
|-----------------|-----------------|-------------|-------------|--|
| 2012.78027      |                 |             |             |  |
| SUPT5H SUPT5H   | 11917.53174     | 10950.1049  | 10808.91175 |  |
| 10562.61833     |                 |             |             |  |
| C4BPB C4BPB     | 97.22381902     | 192.9623383 | 108.9284019 |  |
| 44.30944856     |                 |             |             |  |
| CANX CANX       | 38385.83794     | 39467.90731 | 35132.08817 |  |
| 34055.11086     |                 |             |             |  |
| NOS1AP NOS1AP   | 0 0             | 0.892855753 | 0.942754225 |  |
| MYSM1 MYSM1     | 1043.69184      | 542.3257297 | 833.0344176 |  |
| 1146.389137     |                 |             |             |  |
| RPL36AL RPL36AL | 10125.33363     | 12580.12886 | 10533.01932 |  |
| 9483.164746     |                 |             |             |  |
| TGFBI TGFBI     | 0 0             | 93.74985407 | 38.65292321 |  |
| ZNF711 ZNF711   | 70.28227881     | 1.015591254 | 89.2855753  |  |
| 39.59567744     |                 |             |             |  |
| XPNPEP3 XPNPEP3 | 819.9599194     | 706.8515128 | 1033.926962 |  |
| 845.6505396     |                 |             |             |  |
| DKC1 DKC1       | 7143.022269     | 9134.227739 | 7236.595878 |  |
| 7469.441722     |                 |             |             |  |
| KCNAB3 KCNAB3   | 29.28428284     | 25.38978135 | 108.0355461 |  |
| 35.82466054     |                 |             |             |  |
| AIFM1 AIFM1     | 5149.348294     | 6558.688319 | 3431.244659 |  |
| 3987.850371     |                 |             |             |  |
| ATG12 ATG12     | 2275.974462     | 2039.307238 | 2589.281684 |  |
| 2514.325517     |                 |             |             |  |
| LOC100379224    | LOC100379224    | 780.1332948 | 762.7090318 |  |
| 1991.068329     | 1744.095316     |             |             |  |
| CTBP1-AS2       | CTBP1-AS2       | 747.334898  | 606.3079787 |  |
| 1342.855053     | 1301.00083      |             |             |  |
| HNRNPL HNRNPL   | 8391.70409      | 3482.46241  | 3617.851511 |  |
| 3937.884397     |                 |             |             |  |
| C14orf142       | C14orf142       | 1419.702032 | 1357.845507 |  |
| 1009.819857     | 1314.199389     |             |             |  |
| NKIRAS1 NKIRAS1 | 394.7521326     | 294.5214637 | 627.6775944 |  |
| 537.3699081     |                 |             |             |  |
| CLEC16A CLEC16A | 3420.404235     | 3176.769443 | 2826.781314 |  |
| 2711.36115      |                 |             |             |  |
| PRUNE2 PRUNE2   | 80.82462063     | 24.3741901  | 1.785711506 |  |
| 33.93915209     |                 |             |             |  |
| CLDN19 CLDN19   | 0 4.062365016 0 | 0           | 0           |  |
| RAB3GAP1        | RAB3GAP1        | 2121.353449 | 1785.409425 |  |
| 2748.210008     | 3292.097753     |             |             |  |
| TMEM129 TMEM129 | 1953.847351     | 2350.078162 | 2516.960368 |  |
| 2093.857133     |                 |             |             |  |
| SIRPB1 SIRPB1   | 67.93953618     | 118.8241767 | 42.85707615 |  |
| 42.42394011     |                 |             |             |  |
| PODXL2 PODXL2   | 97.22381902     | 82.26289158 | 128.5712284 |  |
| 210.2341921     |                 |             |             |  |
| FKBP5 FKBP5     | 10376.00709     | 10881.0447  | 14075.87095 |  |
| 15696.85784     |                 |             |             |  |



|                     |             |                 |               |
|---------------------|-------------|-----------------|---------------|
| PIP4K2C PIP4K2C     | 2733.980646 | 3621.598412     | 5026.77789    |
| 4175.458461         |             |                 |               |
| CLEC18A CLEC18A     | 3.51411394  | 1.015591254     | 6.249990271   |
| 7.542033798         |             |                 |               |
| ANKRD30A ANKRD30A   |             | 0 0             | 6.249990271   |
| 0.942754225         |             |                 |               |
| CSMD2 CSMD2         | 0 0         | 0.892855753     | 0.942754225   |
| SCARNA20 SCARNA20   |             | 2.342742627     | 1.015591254 0 |
| 5.656525348         |             |                 |               |
| SCARNA3 SCARNA3     | 1.171371313 | 2.031182508     | 0 0.942754225 |
| LINC01184 LINC01184 |             | 317.4416259     | 305.6929675   |
| 309.8209463         | 411.040842  |                 |               |
| SNORA80A SNORA80A   |             | 1.171371313     | 2.031182508   |
| 3.571423012         | 1.885508449 |                 |               |
| RREB1 RREB1         | 541.1735468 | 301.6306025     | 526.7848943   |
| 461.0068159         |             |                 |               |
| SAP130 SAP130       | 3172.073517 | 3208.252772     | 2636.603039   |
| 2884.827928         |             |                 |               |
| DNAH3 DNAH3         | 4.685485254 | 1.015591254     | 36.60708587   |
| 10.37029647         |             |                 |               |
| SLA2 SLA2           | 2867.516975 | 1536.589567     | 741.9631308   |
| 901.2730388         |             |                 |               |
| ELMOD3 ELMOD3       | 1173.714056 | 1264.411111     | 1420.533503   |
| 1241.607314         |             |                 |               |
| ANTXR1 ANTXR1       | 2.342742627 | 0 16.07140355 0 |               |
| LAPTM4A LAPTM4A     | 3036.194444 | 3360.59146      | 6516.061286   |
| 4870.268325         |             |                 |               |
| ERV3-1 ERV3-1       | 250.6734611 | 165.5413744     | 163.3926028   |
| 253.6008864         |             |                 |               |
| TVP23A TVP23A       | 579.8288002 | 847.0031059     | 601.7847775   |
| 501.5452475         |             |                 |               |
| CD200R1L CD200R1L   |             | 0 0             | 0 0.942754225 |
| TPM4 TPM4           | 43359.48054 | 42058.6806      | 10321.41251   |
| 20203.22304         |             |                 |               |
| SLC27A2 SLC27A2     | 5213.773716 | 2841.624329     | 779.4630724   |
| 2453.046493         |             |                 |               |
| DHX40 DHX40         | 1492.327053 | 1364.954645     | 2202.675143   |
| 1695.072096         |             |                 |               |
| EXOC7 EXOC7         | 6863.064526 | 6411.427587     | 6781.239444   |
| 6566.283175         |             |                 |               |
| TOP1 TOP1           | 3741.359975 | 3334.186087     | 3274.102046   |
| 3470.278301         |             |                 |               |
| GLIS3 GLIS3         | 12.88508445 | 13.2026863      | 11.60712479   |
| 0.942754225         |             |                 |               |
| BBS12 BBS12         | 276.44363   | 300.6150112     | 376.7851278   |
| 383.7009695         |             |                 |               |
| PARP15 PARP15       | 433.407386  | 437.7198305     | 406.2493676   |
| 732.5200326         |             |                 |               |
| TMEM44 TMEM44       | 192.1048954 | 236.6327622     | 63.39275847   |
| 85.79063445         |             |                 |               |

|             |             |             |             |             |             |
|-------------|-------------|-------------|-------------|-------------|-------------|
| SNRPF       | SNRPF       | 5981.021927 | 5148.032067 | 3173.209346 |             |
| 3951.082956 |             |             |             |             |             |
| MARS        | MARS        | 17937.20892 | 26318.03176 | 27280.31468 |             |
| 24274.97853 |             |             |             |             |             |
| RPS14       | RPS14       | 19721.20743 | 24858.62713 | 34236.55385 |             |
| 25144.19793 |             |             |             |             |             |
| DBNL        | DBNL        | 14635.11319 | 25260.80126 | 11345.51805 |             |
| 11561.93781 |             |             |             |             |             |
| SUGT1       | SUGT1       | 2657.84151  | 2514.603945 | 2545.531752 |             |
| 2284.293486 |             |             |             |             |             |
| KNOP1       | KNOP1       | 761.3913537 | 910.9853549 | 837.4986963 |             |
| 760.8026593 |             |             |             |             |             |
| COA6        | COA6        | 2142.438132 | 2295.236234 | 1857.139966 |             |
| 1742.209807 |             |             |             |             |             |
| C16orf86    | C16orf86    |             | 91.36696245 | 54.84192772 |             |
| 106.2498346 | 92.38991402 |             |             |             |             |
| COG8        | COG8        | 2821.833494 | 3966.899438 | 3031.245282 |             |
| 3075.264281 |             |             |             |             |             |
| PPP1R42     | PPP1R42     | 0           | 0           | 0.892855753 | 0           |
| WIPI2       | WIPI2       | 5177.461205 | 4461.492379 | 6385.704346 |             |
| 4010.476472 |             |             |             |             |             |
| GIGYF2      | GIGYF2      | 3914.72293  | 3784.093013 | 3904.458208 |             |
| 3416.54131  |             |             |             |             |             |
| METTL21A    | METTL21A    |             | 787.1615226 | 1006.450933 |             |
| 1024.105549 | 900.3302846 |             |             |             |             |
| BSPRY       | BSPRY       | 452.149327  | 488.4993932 | 194.6425542 |             |
| 238.5168189 |             |             |             |             |             |
| OR10G2      | OR10G2      | 0           | 0           | 1.885508449 |             |
| CCDC73      | CCDC73      | 1382.21815  | 1613.774503 | 1525.890482 |             |
| 1771.435188 |             |             |             |             |             |
| VCPKMT      | VCPKMT      | 730.9356996 | 480.3746632 | 1142.855364 |             |
| 1104.907951 |             |             |             |             |             |
| MY07B       | MY07B       | 33.96976809 | 24.3741901  | 3.571423012 | 0           |
| ZNF331      | ZNF331      | 764.9054677 | 546.3880947 | 2665.174423 |             |
| 1826.114933 |             |             |             |             |             |
| EVPLL       | EVPLL       | 0           | 2.031182508 | 0           | 0           |
| SSX2IP      | SSX2IP      | 967.5527049 | 726.1477466 | 1042.85552  |             |
| 895.6165135 |             |             |             |             |             |
| PTCH2       | PTCH2       | 24.59879758 | 26.40537261 | 40.17850889 |             |
| 15.0840676  |             |             |             |             |             |
| KCNJ11      | KCNJ11      | 3.51411394  | 0           | 13.3928363  | 8.484788022 |
| SDAD1       | SDAD1       | 3876.067676 | 4322.356377 | 4866.063854 |             |
| 4854.241503 |             |             |             |             |             |
| RNASEH1     | RNASEH1     | 3188.472715 | 4133.456404 | 2806.245632 |             |
| 3141.257077 |             |             |             |             |             |
| FCH01       | FCH01       | 3323.180416 | 2949.277002 | 1990.175474 |             |
| 2493.584924 |             |             |             |             |             |
| FAM221B     | FAM221B     | 1.171371313 | 0           | 0           | 0           |
| PAICS       | PAICS       | 14975.98224 | 17471.21634 | 10697.30478 |             |
| 12205.83895 |             |             |             |             |             |

|             |          |             |             |             |
|-------------|----------|-------------|-------------|-------------|
| TRAPPC3L    | TRAPPC3L | 0           | 0           | 0.892855753 |
| 4.713771124 |          |             |             |             |
| FBP1        | FBP1     | 3.51411394  | 11.17150379 | 150.8926223 |
| 101.8174563 |          |             |             |             |
| GALE        | GALE     | 2163.522816 | 2694.363597 | 1541.961885 |
| 1831.771459 |          |             |             |             |
| ALDOA       | ALDOA    | 74741.6894  | 111894.7976 | 70068.64093 |
| 77347.32761 |          |             |             |             |
| PLSCR2      | PLSCR2   | 1.171371313 | 0           | 16.07140355 |
| 9.427542247 |          |             |             |             |
| GAS2        | GAS2     | 44.51210991 | 78.20052656 | 7.142846024 |
| 11.3130507  |          |             |             |             |
| CERS1       | CERS1    | 0           | 3.046773762 | 0           |
| LSMEM1      | LSMEM1   | 9.370970508 | 4.062365016 | 50.89277792 |
| 3.771016899 |          |             |             |             |
| IQCH        | IQCH     | 43.3407386  | 54.84192772 | 58.03562395 |
| 124.4435577 |          |             |             |             |
| TLE4        | TLE4     | 1160.828972 | 1728.536314 | 2857.13841  |
| 1889.279466 |          |             |             |             |
| MON1B       | MON1B    | 6166.098594 | 7161.949524 | 5524.9914   |
| 5702.720305 |          |             |             |             |
| TFB1M       | TFB1M    | 1096.403549 | 1144.571343 | 1018.748414 |
| 1370.764643 |          |             |             |             |
| SLC38A5     | SLC38A5  | 3361.83567  | 3723.157537 | 1884.818495 |
| 1971.299084 |          |             |             |             |
| OIT3        | OIT3     | 4.685485254 | 0           | 0           |
| C19orf35    | C19orf35 | 38.39279738 | 122.9939879 | 5.656525348 |
| 31.11088942 |          |             |             | 268.1160911 |
| PRR14L      | PRR14L   | 3215.414255 | 2481.089434 | 2946.423985 |
| 2531.295093 |          |             |             |             |
| UNC5CL      | UNC5CL   | 37.48388203 | 23.35859884 | 37.49994163 |
| 103.7029647 |          |             |             |             |
| MIR4531     | MIR4531  | 2.342742627 | 0           | 0           |
| MIR4530     | MIR4530  | 2.342742627 | 0           | 0           |
| MIR4526     | MIR4526  | 2.342742627 | 0           | 0           |
| SC5D        | SC5D     | 879.6998564 | 1002.388568 | 2.828262674 |
| 1915.676585 |          |             |             | 1808.0329   |
| TGFBR2      | TGFBR2   | 7444.064697 | 5641.609416 | 14867.834   |
| 13427.64842 |          |             |             |             |
| FUT6        | FUT6     | 2.342742627 | 0           | 0           |
| VASN        | VASN     | 19.91331233 | 24.3741901  | 1.885508449 |
| 22.62610139 |          |             |             | 105.3569789 |
| TMEM139     | TMEM139  | 65.59679355 | 88.3564391  | 197.3211214 |
| 125.3863119 |          |             |             |             |
| TSPYL6      | TSPYL6   | 0           | 1.015591254 | 0           |
| KDM5C       | KDM5C    | 4534.378354 | 3375.825328 | 4115.172166 |
| 2538.837127 |          |             |             |             |
| LAMTOR5     | LAMTOR5  | 7143.022269 | 7536.702696 | 6139.276158 |
| 6039.283564 |          |             |             |             |
| KLF4        | KLF4     | 0           | 3.046773762 | 0           |
| ANP32B      | ANP32B   | 8283.937929 | 8370.503116 | 5684.81258  |

|             |          |             |             |             |
|-------------|----------|-------------|-------------|-------------|
| 6099.619834 |          |             |             |             |
| LAT         | LAT      | 16104.01282 | 21157.8126  | 9490.163799 |
| 12097.42221 |          |             |             |             |
| IPCEF1      | IPCEF1   | 2314.629715 | 2119.538947 | 5924.097921 |
| 5315.248319 |          |             |             |             |
| DLG4        | DLG4     | 668.85302   | 735.2880679 | 400.8922331 |
| 501.5452475 |          |             |             |             |
| COPS7A      | COPS7A   | 3031.508959 | 3732.297859 | 3442.851784 |
| 3801.185034 |          |             |             |             |
| CKAP2       | CKAP2    | 5900.197306 | 6419.552317 | 2942.852562 |
| 4627.037735 |          |             |             |             |
| TMCC1       | TMCC1    | 347.8972801 | 202.1026596 | 324.1066384 |
| 228.1465224 |          |             |             |             |
| MXD4        | MXD4     | 2661.355624 | 3169.660304 | 1607.140355 |
| 1903.42078  |          |             |             |             |
| CHD1L       | CHD1L    | 4124.398395 | 4328.449925 | 1632.140317 |
| 2836.747462 |          |             |             |             |
| RAB3D       | RAB3D    | 156.963756  | 102.5747167 | 161.6068913 |
| 199.8638956 |          |             |             |             |
| BAG2        | BAG2     | 3641.793414 | 3358.560277 | 1503.569088 |
| 2122.13976  |          |             |             |             |
| BAG3        | BAG3     | 2014.758659 | 2115.476582 | 2583.031694 |
| 1849.683789 |          |             |             |             |
| PIGL        | PIGL     | 339.6976809 | 515.9203571 | 534.8205961 |
| 481.7474088 |          |             |             |             |
| CLCA2       | CLCA2    | 0           | 27.67852834 | 0           |
| ZNF518A     | ZNF518A  | 1204.16971  | 761.6934405 | 991.0698859 |
| 1117.163756 |          |             |             |             |
| BMS1        | BMS1     | 6451.913195 | 7930.752103 | 6541.954102 |
| 7053.687109 |          |             |             |             |
| PRCC        | PRCC     | 3888.952761 | 4864.682107 | 3642.851472 |
| 3355.262286 |          |             |             |             |
| LTV1        | LTV1     | 3105.305352 | 3812.529568 | 3621.422934 |
| 3522.129784 |          |             |             |             |
| ZNF716      | ZNF716   | 0           | 0           | 1.885508449 |
| SNORA14B    | SNORA14B | 0           | 3.51411394  | 4.062365016 |
| 10.71426904 |          |             |             |             |
| MSH6        | MSH6     | 11254.53558 | 10995.80651 | 7334.810011 |
| 9527.474195 |          |             |             |             |
| PQLC2       | PQLC2    | 527.1170911 | 750.5219367 | 483.9278181 |
| 503.430756  |          |             |             |             |
| IKZF3       | IKZF3    | 15205.57102 | 6687.668408 | 6586.59689  |
| 7065.00016  |          |             |             |             |
| DTYMK       | DTYMK    | 6205.925219 | 8564.481045 | 3905.351064 |
| 4163.202656 |          |             |             |             |
| MED12       | MED12    | 4578.890464 | 1795.565337 | 2165.175201 |
| 2477.558103 |          |             |             |             |
| SERGEF      | SERGEF   | 935.9256795 | 999.341794  | 1021.426981 |
| 1126.591299 |          |             |             |             |
| YWHAZ       | YWHAZ    | 96583.07891 | 106807.701  | 63120.43746 |

|             |          |             |             |             |             |
|-------------|----------|-------------|-------------|-------------|-------------|
| 71863.32629 |          |             |             |             |             |
| TPM1        | TPM1     | 126.5081019 | 194.9935208 | 393.7493871 |             |
| 312.0516484 |          |             |             |             |             |
| TMEM230     | TMEM230  | 6362.888975 | 7052.265668 | 6780.346589 |             |
| 6665.272369 |          |             |             |             |             |
| LGALS9C     | LGALS9C  | 0           | 9.140321286 | 0           | 0           |
| GSPT2       | GSPT2    | 1010.893444 | 962.7805088 | 688.3917856 |             |
| 976.6933768 |          |             |             |             |             |
| ENOX1       | ENOX1    | 16.39919839 | 36.56128515 | 24.10710533 |             |
| 51.85148236 |          |             |             |             |             |
| TTC14       | TTC14    | 1310.7645   | 994.2638377 | 1461.604868 |             |
| 1772.377942 |          |             |             |             |             |
| MRPS21      | MRPS21   | 3719.10392  | 3463.166176 | 3000.888186 |             |
| 3430.682624 |          |             |             |             |             |
| LARP4       | LARP4    | 6211.782075 | 6166.670095 | 4897.313805 |             |
| 5192.69027  |          |             |             |             |             |
| PLAC8       | PLAC8    | 725.078843  | 308.7397412 | 4280.35048  |             |
| 6229.719917 |          |             |             |             |             |
| NOX5        | NOX5     | 17.5705697  | 4.062365016 | 4.464278765 |             |
| 9.427542247 |          |             |             |             |             |
| E2F5        | E2F5     | 401.7803605 | 267.1004998 | 291.9638312 |             |
| 398.7850371 |          |             |             |             |             |
| FANCA       | FANCA    | 5917.767876 | 4698.125141 | 2849.995564 |             |
| 3665.428426 |          |             |             |             |             |
| PODXL       | PODXL    | 120.6512453 | 48.74838019 | 0           | 114.0732612 |
| CDC42SE2    | CDC42SE2 |             | 12525.47345 | 27061.44456 |             |
| 44824.93023 |          | 15345.21052 |             |             |             |
| C7orf57     | C7orf57  | 0           | 2.031182508 | 57.14276819 | 8.484788022 |
| RAPGEF5     | RAPGEF5  | 12.88508445 | 4.062365016 | 25.89281684 |             |
| 18.85508449 |          |             |             |             |             |
| MCM3        | MCM3     | 23532.84969 | 30188.45003 | 18062.47188 |             |
| 20983.82353 |          |             |             |             |             |
| ADAMTSL3    | ADAMTSL3 |             | 1.171371313 | 1.015591254 | 0           |
| 0           |          |             |             |             |             |
| CCSER1      | CCSER1   | 4.685485254 | 0           | 0.892855753 | 13.19855915 |
| ATP6V0A1    | ATP6V0A1 |             | 1063.605153 | 2090.086801 |             |
| 1866.96138  |          | 906.9295642 |             |             |             |
| EXOC4       | EXOC4    | 2923.742798 | 2677.098546 | 2277.675026 |             |
| 2919.709834 |          |             |             |             |             |
| IRAK4       | IRAK4    | 2155.323217 | 1472.607318 | 1530.354761 |             |
| 2125.910777 |          |             |             |             |             |
| ELK4        | ELK4     | 1144.429773 | 611.3859349 | 1419.640647 |             |
| 1676.217012 |          |             |             |             |             |
| TRPV2       | TRPV2    | 5633.124646 | 9099.697636 | 2291.960718 |             |
| 3361.861565 |          |             |             |             |             |
| PKD2L1      | PKD2L1   | 0           | 0           | 2.828262674 |             |
| C1orf194    | C1orf194 |             | 2.342742627 | 6.093547524 |             |
| 13.3928363  |          | 3.771016899 |             |             |             |
| RPRML       | RPRML    | 0           | 2.031182508 | 0           | 0           |
| RBM12B      | RBM12B   | 1400.960091 | 1217.693914 | 1960.711234 |             |

|             |             |             |             |             |
|-------------|-------------|-------------|-------------|-------------|
| 1828.000442 |             |             |             |             |
| C12orf42    | C12orf42    |             | 17.5705697  | 34.53010264 |
| 62.49990271 | 27.33987252 |             |             |             |
| AUP1        | AUP1        | 8048.492295 | 9853.266347 | 7715.166562 |
| 7298.803208 |             |             |             |             |
| SLC46A3     | SLC46A3     | 1240.482221 | 1089.729416 | 1235.712362 |
| 1434.87193  |             |             |             |             |
| EML2        | EML2        | 3035.023073 | 1819.939527 | 2552.674598 |
| 2266.381156 |             |             |             |             |
| ZSCAN9      | ZSCAN9      | 127.6794732 | 231.5548059 | 95.53556557 |
| 117.8442781 |             |             |             |             |
| DAGLA       | DAGLA       | 17.5705697  | 14.21827756 | 21.42853807 |
| 1.885508449 |             |             |             |             |
| RPGRIP1     | RPGRIP1     | 9.370970508 | 16.24946006 | 8.92855753  |
| 20.74059294 |             |             |             |             |
| BTBD10      | BTBD10      | 2739.837502 | 3247.86083  | 2085.711039 |
| 1986.383151 |             |             |             |             |
| WHSC1       | WHSC1       | 10385.37807 | 6765.868934 | 3135.709405 |
| 4282.932443 |             |             |             |             |
| ZNF7        | ZNF7        | 1185.427769 | 1158.789621 | 2469.639013 |
| 1698.843113 |             |             |             |             |
| 7-Mar       | 7-Mar       | 8630.663838 | 8196.837011 | 10082.12716 |
| 9514.275636 |             |             |             |             |
| TBL1XR1     | TBL1XR1     | 7517.86109  | 5588.798671 | 5350.884528 |
| 6381.503347 |             |             |             |             |
| PCDHB9      | PCDHB9      | 0           | 0           | 7.542033798 |
| NOX1        | NOX1        | 44.51210991 | 39.60805891 | 27.67852834 |
| 49.96597391 |             |             |             |             |
| PRC1        | PRC1        | 5710.435153 | 5168.343892 | 2062.49679  |
| 3368.460845 |             |             |             |             |
| CHMP2B      | CHMP2B      | 1997.188089 | 1901.186828 | 2526.781781 |
| 2371.969629 |             |             |             |             |
| CPNE2       | CPNE2       | 309.2420268 | 350.3789826 | 453.5707225 |
| 281.8835132 |             |             |             |             |
| ETNK2       | ETNK2       | 15.22782708 | 12.18709505 | 380.3565508 |
| 201.7494041 |             |             |             |             |
| SAGE1       | SAGE1       | 21.08468364 | 0           | 0           |
| DDX43       | DDX43       | 76.13913537 | 35.54569389 | 1.785711506 |
| 93.33266825 |             |             |             |             |
| DDX49       | DDX49       | 2960.055309 | 4100.957484 | 2692.852951 |
| 2543.550898 |             |             |             |             |
| LPO         | LPO         | 0           | 1.015591254 | 0           |
| TNFAIP3     | TNFAIP3     | 13538.70964 | 14612.32696 | 15242.83342 |
| 19015.35271 |             |             |             |             |
| TST         | TST         | 425.2077868 | 675.3681839 | 126.7855169 |
| 138.584871  |             |             |             |             |
| PTP4A3      | PTP4A3      | 742.6494127 | 3536.288747 | 1969.639791 |
| 1706.385147 |             |             |             |             |
| GLCE        | GLCE        | 305.7279128 | 443.813378  | 304.4638118 |
| 382.7582152 |             |             |             |             |

|              |              |             |             |               |
|--------------|--------------|-------------|-------------|---------------|
| RNF113A      | RNF113A      | 1656.319037 | 2113.4454   | 2408.031966   |
| 2073.11654   |              |             |             |               |
| SUSD5        | SUSD5        | 2.342742627 | 2.031182508 | 4.464278765   |
| 8.484788022  |              |             |             |               |
| PLEKHG3      | PLEKHG3      | 1188.941883 | 718.0230166 | 195.5354099   |
| 500.6024933  |              |             |             |               |
| DMC1         | DMC1         | 720.3933578 | 475.2967069 | 287.4995525   |
| 430.8386807  |              |             |             |               |
| KAT7         | KAT7         | 5154.033779 | 5490.286319 | 6259.811684   |
| 5828.106617  |              |             |             |               |
| CDC37        | CDC37        | 7449.921554 | 6804.461402 | 4719.635511   |
| 5494.371622  |              |             |             |               |
| INTS5        | INTS5        | 4372.729113 | 5051.550898 | 3615.172944   |
| 3738.020501  |              |             |             |               |
| DAB1         | DAB1         | 36.31251072 | 21.32741634 | 0 19.79783872 |
| CHST11       | CHST11       | 3452.031261 | 5053.58208  | 1624.104615   |
| 2033.520863  |              |             |             |               |
| PAX6         | PAX6         | 35.1411394  | 27.42096386 | 70.53560449   |
| 64.10728728  |              |             |             |               |
| MUC22        | MUC22        | 0 0         | 13.3928363  | 0             |
| BPGM         | BPGM         | 1916.363469 | 3156.457618 | 2009.8183     |
| 1798.775061  |              |             |             |               |
| RNF138       | RNF138       | 4233.335927 | 3475.353271 | 5322.313144   |
| 5670.666662  |              |             |             |               |
| CACNB3       | CACNB3       | 89.02421982 | 41.63924142 | 86.60700804   |
| 56.56525348  |              |             |             |               |
| RAB22A       | RAB22A       | 3940.493098 | 4410.712816 | 4528.564379   |
| 4706.22909   |              |             |             |               |
| DNAJC10      | DNAJC10      | 4257.934724 | 3750.578501 | 4327.671835   |
| 4583.671041  |              |             |             |               |
| MAGEA8-AS1   | MAGEA8-AS1   | 0 0         | 0 0         | 6.249990271   |
| 0.942754225  |              |             |             |               |
| LOC284581    | LOC284581    |             | 79.65324932 | 44.68601518   |
| 83.92844078  | 163.0964809  |             |             |               |
| MIR137HG     | MIR137HG     |             | 1.171371313 | 0 0           |
| 0.942754225  |              |             |             |               |
| LINC01146    | LINC01146    |             | 15.22782708 | 4.062365016   |
| 10.71426904  | 20.74059294  |             |             |               |
| LOC654841    | LOC654841    |             | 17.5705697  | 21.32741634   |
| 54.46420093  | 40.53843166  |             |             |               |
| TRAF3IP2-AS1 | TRAF3IP2-AS1 |             | 324.4698538 | 185.8531995   |
| 518.7491925  | 389.3574948  |             |             |               |
| RNF185       | RNF185       | 2921.400056 | 3934.400518 | 4499.992995   |
| 3991.621387  |              |             |             |               |
| MKKS         | MKKS         | 1905.821127 | 2020.011004 | 2165.175201   |
| 2548.264669  |              |             |             |               |
| GSDMC        | GSDMC        | 0 0         | 3.571423012 | 0             |
| ATG14        | ATG14        | 508.37515   | 338.1918876 | 988.3913186   |
| 818.3106671  |              |             |             |               |
| ZNF767P      | ZNF767P      | 285.8146005 | 137.1048193 | 732.1417175   |

|              |              |             |             |             |             |   |
|--------------|--------------|-------------|-------------|-------------|-------------|---|
| 806.0548621  |              |             |             |             |             |   |
| MUC20        | MUC20        | 53.88308042 | 20.31182508 | 50.89277792 |             |   |
| 83.905126    |              |             |             |             |             |   |
| TMEM14B      | TMEM14B      | 5988.050154 | 6976.096324 | 5273.206077 |             |   |
| 5052.21989   |              |             |             |             |             |   |
| SRRM4        | SRRM4        | 0           | 0           | 1.885508449 |             |   |
| FTL          | FTL          | 101518.0663 | 173409.1599 | 219451.4441 |             |   |
| 112730.7792  |              |             |             |             |             |   |
| LOC101927051 | LOC101927051 |             | 1441.958087 | 695.680009  |             |   |
| 331.2494844  |              | 523.2285947 |             |             |             |   |
| KCNJ1        | KCNJ1        | 1.171371313 | 4.062365016 | 0           | 0           |   |
| CLEC4A       | CLEC4A       | 19.91331233 | 7.109138778 | 29.46423985 |             |   |
| 13.19855915  |              |             |             |             |             |   |
| RNF212       | RNF212       | 25.7701689  | 9.140321286 | 71.42846024 |             |   |
| 64.10728728  |              |             |             |             |             |   |
| SF3A2        | SF3A2        | 1754.714228 | 1650.335788 | 1628.568894 |             |   |
| 1306.657355  |              |             |             |             |             |   |
| SLC16A5      | SLC16A5      | 91.36696245 | 96.48116913 | 261.6067356 |             |   |
| 267.7421998  |              |             |             |             |             |   |
| PRKRIR       | PRKRIR       | 2164.694187 | 2020.011004 | 2221.425114 |             |   |
| 2618.028482  |              |             |             |             |             |   |
| RABEP1       | RABEP1       | 5610.868591 | 4662.579447 | 4414.278843 |             |   |
| 5449.119419  |              |             |             |             |             |   |
| LINC01372    | LINC01372    |             | 1.171371313 | 1.015591254 |             |   |
| 21.42853807  |              | 2.828262674 |             |             |             |   |
| CAPS         | CAPS         | 144.0786716 | 60.93547524 | 141.071209  |             |   |
| 160.2682182  |              |             |             |             |             |   |
| ARHGAP29     | ARHGAP29     |             | 1.171371313 | 0           | 0           | 0 |
| TIMM8B       | TIMM8B       | 3262.269108 | 3568.787667 | 2323.210669 |             |   |
| 2402.137765  |              |             |             |             |             |   |
| TIMM9        | TIMM9        | 1245.167706 | 1140.508978 | 1190.176719 |             |   |
| 1239.721806  |              |             |             |             |             |   |
| TIMM13       | TIMM13       | 3596.109932 | 4888.040706 | 2497.317541 |             |   |
| 2560.520474  |              |             |             |             |             |   |
| TIMM10       | TIMM10       | 3354.807442 | 5684.264249 | 2704.460076 |             |   |
| 2753.78509   |              |             |             |             |             |   |
| SETD1B       | SETD1B       | 540.0021755 | 393.0338153 | 623.2133156 |             |   |
| 494.0032138  |              |             |             |             |             |   |
| LY6K         | LY6K         | 0           | 0           | 3.571423012 | 4.713771124 |   |
| PDE7A        | PDE7A        | 4669.086055 | 4440.164963 | 2677.674403 |             |   |
| 3883.204652  |              |             |             |             |             |   |
| PCOLCE       | PCOLCE       | 35.1411394  | 46.71719769 | 48.21421066 |             |   |
| 30.16813519  |              |             |             |             |             |   |
| PCSK2        | PCSK2        | 0           | 1.015591254 | 0           | 0.942754225 |   |
| PTPRU        | PTPRU        | 12.88508445 | 0           | 0           | 0           |   |
| TMEM208      | TMEM208      | 3358.321556 | 4018.694592 | 3058.92381  |             |   |
| 2453.046493  |              |             |             |             |             |   |
| SLC38A6      | SLC38A6      | 241.3024906 | 267.1004998 | 149.9997665 |             |   |
| 290.3683012  |              |             |             |             |             |   |
| DBX1         | DBX1         | 0           | 0           | 0.892855753 | 8.484788022 |   |



|             |          |             |             |             |             |
|-------------|----------|-------------|-------------|-------------|-------------|
| HNRNPH2     | HNRNPH2  | 8041.464067 | 8516.748256 | 12454.4449  |             |
| 10704.97422 |          |             |             |             |             |
| SUOX        | SUOX     | 747.334898  | 1800.643293 | 577.6776722 |             |
| 458.1785532 |          |             |             |             |             |
| ZNF562      | ZNF562   | 614.9699396 | 463.1096118 | 792.8559087 |             |
| 726.8635073 |          |             |             |             |             |
| VN1R1       | VN1R1    | 7.028227881 | 7.109138778 | 46.42849916 |             |
| 22.62610139 |          |             |             |             |             |
| ATP6V0A4    | ATP6V0A4 |             | 19.91331233 | 2.031182508 | 0           |
| 22.62610139 |          |             |             |             |             |
| FGF23       | FGF23    | 8.199599194 | 9.140321286 | 1.785711506 |             |
| 7.542033798 |          |             |             |             |             |
| ALPK1       | ALPK1    | 220.2178069 | 224.4456671 | 2306.24641  |             |
| 1964.699804 |          |             |             |             |             |
| RTN1        | RTN1     | 1.171371313 | 1.015591254 | 0           | 17.91233027 |
| HECTD1      | HECTD1   | 4481.666645 | 3035.602258 | 3528.565936 |             |
| 4724.14142  |          |             |             |             |             |
| UMPS        | UMPS     | 4653.858228 | 6256.042125 | 4782.135413 |             |
| 4646.835574 |          |             |             |             |             |
| SF1         | SF1      | 12929.59656 | 9255.083098 | 8994.628856 |             |
| 9008.016617 |          |             |             |             |             |
| HEIH        | HEIH     | 946.4680213 | 1058.246087 | 2122.318125 |             |
| 1773.320697 |          |             |             |             |             |
| KIF19       | KIF19    | 32.79839678 | 31.48332888 | 10.71426904 | 0           |
| EBAG9       | EBAG9    | 1151.458001 | 1092.776189 | 1956.246955 |             |
| 1500.864726 |          |             |             |             |             |
| DYNLRB1     | DYNLRB1  | 4971.299854 | 5495.364276 | 3582.137281 |             |
| 4108.522911 |          |             |             |             |             |
| CYP3A43     | CYP3A43  | 0           | 0           | 0.892855753 | 1.885508449 |
| DYDC2       | DYDC2    | 0           | 0           | 0           | 9.427542247 |
| CAPG        | CAPG     | 2284.174061 | 9377.96964  | 1767.854391 |             |
| 1002.147741 |          |             |             |             |             |
| IGSF9B      | IGSF9B   | 194.447638  | 133.0424543 | 118.7498152 |             |
| 106.5312274 |          |             |             |             |             |
| YPEL3       | YPEL3    | 3018.623875 | 2252.581401 | 3832.136892 |             |
| 3439.167412 |          |             |             |             |             |
| SFXN4       | SFXN4    | 1883.565072 | 2144.928729 | 1351.78361  |             |
| 1669.617732 |          |             |             |             |             |
| ABCG2       | ABCG2    | 1341.220154 | 804.3482732 | 207.1425347 |             |
| 434.6096976 |          |             |             |             |             |
| CRLF1       | CRLF1    | 1.171371313 | 0           | 0.892855753 | 2.828262674 |
| IRS1        | IRS1     | 72.62502143 | 4.062365016 | 105.3569789 |             |
| 35.82466054 |          |             |             |             |             |
| GUCY1A3     | GUCY1A3  | 4.685485254 | 18.28064257 | 13.3928363  |             |
| 16.02682182 |          |             |             |             |             |
| GXYLT1      | GXYLT1   | 1008.550701 | 830.7536458 | 729.4631502 |             |
| 967.2658346 |          |             |             |             |             |
| MARVELD3    | MARVELD3 |             | 16.39919839 | 8.124730032 |             |
| 1.785711506 |          | 10.37029647 |             |             |             |
| ALAD        | ALAD     | 1919.877583 | 1853.454039 | 2083.925328 |             |

|             |             |             |             |             |
|-------------|-------------|-------------|-------------|-------------|
| 2225.842725 |             |             |             |             |
| KCNK6       | KCNK6       | 1193.627368 | 1235.974556 | 907.1414451 |
| 1271.775449 |             |             |             |             |
| PLD1        | PLD1        | 195.6190093 | 143.1983668 | 95.53556557 |
| 127.2718203 |             |             |             |             |
| NLRP3       | NLRP3       | 3.51411394  | 15.23386881 | 219.6425152 |
| 94.27542247 |             |             |             |             |
| SH3BP2      | SH3BP2      | 2239.661951 | 1887.984141 | 1062.498346 |
| 1412.245829 |             |             |             |             |
| RGS1        | RGS1        | 9525.591521 | 14134.99907 | 18522.2926  |
| 15671.40348 |             |             |             |             |
| SNAP25      | SNAP25      | 5.856856567 | 2.031182508 | 19.64282657 |
| 78.24860065 |             |             |             |             |
| RFX3        | RFX3        | 454.4920696 | 257.9601785 | 581.2490952 |
| 505.3162644 |             |             |             |             |
| SLC16A1     | SLC16A1     | 6881.806467 | 10172.162   | 4516.064399 |
| 4702.458073 |             |             |             |             |
| MPP1        | MPP1        | 1614.14967  | 1772.206738 | 1248.212343 |
| 1665.846715 |             |             |             |             |
| C12orf56    | C12orf56    |             | 2.342742627 | 3.046773762 |
| 12.49998054 | 12.25580492 |             |             |             |
| EIF4EBP3    | EIF4EBP3    |             | 107.7661608 | 190.9311558 |
| 542.8562978 | 444.0372398 |             |             |             |
| SSNA1       | SSNA1       | 4479.323903 | 5813.244338 | 3352.673353 |
| 3326.979659 |             |             |             |             |
| EVC2        | EVC2        | 235.445634  | 23.35859884 | 36.60708587 |
| 142.3558879 |             |             |             |             |
| AANAT       | AANAT       | 0           | 2.031182508 | 0           |
| 4.713771124 |             |             |             |             |
| NIPAL4      | NIPAL4      | 37.48388203 | 28.43655511 | 25.89281684 |
| 135.7566084 |             |             |             |             |
| SYNJ2       | SYNJ2       | 4048.259259 | 2307.423329 | 1574.997548 |
| 2009.009253 |             |             |             |             |
| CCDC23      | CCDC23      | 630.1977666 | 692.6332353 | 545.5348651 |
| 530.7706285 |             |             |             |             |
| LRRC37A3    | LRRC37A3    |             | 28.11291152 | 18.28064257 |
| 45.5356434  | 39.59567744 |             |             |             |
| P2RY2       | P2RY2       | 0           | 0           | 4.464278765 |
| 0           |             |             |             |             |
| SLC43A3     | SLC43A3     | 10182.73083 | 16257.58479 | 8799.093446 |
| 10014.87813 |             |             |             |             |
| XCL2        | XCL2        | 4.685485254 | 148.2763231 | 2516.960368 |
| 30.16813519 |             |             |             |             |
| SUPV3L1     | SUPV3L1     | 2881.573431 | 3937.447292 | 3608.030098 |
| 3073.378773 |             |             |             |             |
| WDR65       | WDR65       | 2.342742627 | 17.26505132 | 19.64282657 |
| 56.56525348 |             |             |             |             |
| MDM4        | MDM4        | 1080.004351 | 834.8160108 | 2920.531168 |
| 1549.887945 |             |             |             |             |
| SPHK2       | SPHK2       | 1671.546864 | 1581.275583 | 1367.855014 |
| 1338.710999 |             |             |             |             |
| FOXO3       | FOXO3       | 987.4660172 | 709.8982866 | 2362.496323 |

|                 |             |             |             |             |  |
|-----------------|-------------|-------------|-------------|-------------|--|
| 1490.494429     |             |             |             |             |  |
| FOXJ1 FOXJ1     | 3.51411394  | 5.07795627  | 8.92855753  |             |  |
| 10.37029647     |             |             |             |             |  |
| FOXC1 FOXC1     | 4.685485254 | 7.109138778 | 0.892855753 | 0           |  |
| IKBKB IKBKB     | 4189.995188 | 2498.354485 | 2089.282462 |             |  |
| 2759.441616     |             |             |             |             |  |
| GPC4 GPC4       | 2.342742627 | 0           | 33.03566286 | 1.885508449 |  |
| FABP5 FABP5     | 6182.497792 | 5956.442705 | 4565.171465 |             |  |
| 5642.384035     |             |             |             |             |  |
| NFKB2 NFKB2     | 11707.85628 | 12794.41862 | 13527.65751 |             |  |
| 12075.73886     |             |             |             |             |  |
| NFIX NFIX       | 3.51411394  | 5.07795627  | 17.85711506 |             |  |
| 40.53843166     |             |             |             |             |  |
| NDUFB3 NDUFB3   | 8480.728309 | 7899.268774 | 3956.243842 |             |  |
| 5057.876416     |             |             |             |             |  |
| ATP2C1 ATP2C1   | 4840.106267 | 3739.406997 | 2104.46101  |             |  |
| 2257.896368     |             |             |             |             |  |
| SLC1A4 SLC1A4   | 18736.08416 | 22982.83008 | 3294.637729 |             |  |
| 5867.702295     |             |             |             |             |  |
| UBR2 UBR2       | 5121.235382 | 3361.607051 | 4843.74246  |             |  |
| 5196.461287     |             |             |             |             |  |
| CHRNA10 CHRNA10 | 17.5705697  | 9.140321286 | 52.67848943 |             |  |
| 15.0840676      |             |             |             |             |  |
| EBI3 EBI3       | 633.7118806 | 1190.27295  | 2022.318281 |             |  |
| 1334.939982     |             |             |             |             |  |
| KLRG1 KLRG1     | 272.929516  | 137.1048193 | 402.6779446 |             |  |
| 519.4575778     |             |             |             |             |  |
| MPZL2 MPZL2     | 73.79639275 | 129.9956805 | 328.5709171 |             |  |
| 336.5632582     |             |             |             |             |  |
| IER3 IER3       | 66.76816487 | 0           | 0           | 90.50440557 |  |
| NAGLU NAGLU     | 666.5102774 | 785.0520394 | 969.6413478 |             |  |
| 862.6201156     |             |             |             |             |  |
| NAGA NAGA       | 5472.646776 | 5934.099697 | 2323.210669 |             |  |
| 3347.720252     |             |             |             |             |  |
| AGAP2-AS1       | AGAP2-AS1   | 254.187575  | 183.822017  |             |  |
| 60.71419121     | 70.70656685 |             |             |             |  |
| TCAIM TCAIM     | 1205.341082 | 1405.578296 | 846.4272539 |             |  |
| 981.4071479     |             |             |             |             |  |
| GLRA4 GLRA4     | 0           | 0           | 5.357134518 | 0           |  |
| TRIM71 TRIM71   | 2.342742627 | 5.07795627  | 27.67852834 |             |  |
| 23.56885562     |             |             |             |             |  |
| MOSPD3 MOSPD3   | 713.3651299 | 1484.794413 | 518.7491925 |             |  |
| 595.82067       |             |             |             |             |  |
| KALRN KALRN     | 2.342742627 | 0           | 98.21413283 | 50.90872813 |  |
| CCDC180 CCDC180 | 48.02622385 | 41.63924142 | 75.89273901 |             |  |
| 58.45076193     |             |             |             |             |  |
| UBE2J1 UBE2J1   | 7914.955965 | 7005.54847  | 4241.064827 |             |  |
| 5271.881625     |             |             |             |             |  |
| BABAM1 BABAM1   | 6685.016086 | 8786.89553  | 5085.706369 |             |  |
| 4993.769128     |             |             |             |             |  |

|             |             |             |             |             |             |
|-------------|-------------|-------------|-------------|-------------|-------------|
| NACC1       | NACC1       | 429.893272  | 162.4946006 | 91.07128681 |             |
| 123.5008034 |             |             |             |             |             |
| TMTC3       | TMTC3       | 435.7501286 | 323.97361   | 566.0705474 |             |
| 459.1213074 |             |             |             |             |             |
| FAM104A     | FAM104A     | 7823.589003 | 10323.4851  | 5742.848203 |             |
| 6540.828811 |             |             |             |             |             |
| ZNF841      | ZNF841      | 332.669453  | 382.8779028 | 937.4985407 |             |
| 643.9011355 |             |             |             |             |             |
| BTF3L4      | BTF3L4      | 2929.599655 | 2895.450665 | 3531.244503 |             |
| 3243.074533 |             |             |             |             |             |
| HOMER3      | HOMER3      | 12.88508445 | 21.32741634 | 0           | 14.14131337 |
| C16orf45    | C16orf45    |             | 420.5223015 | 522.0139046 |             |
| 320.5352153 | 302.6241061 |             |             |             |             |
| LOXL1-AS1   | LOXL1-AS1   |             | 97.22381902 | 157.4166444 |             |
| 203.5711117 | 375.2161814 |             |             |             |             |
| UAP1        | UAP1        | 1827.339249 | 2459.762017 | 3116.066578 |             |
| 2634.998058 |             |             |             |             |             |
| POC1B       | POC1B       | 2381.39788  | 3370.747372 | 1946.425542 |             |
| 1939.24544  |             |             |             |             |             |
| CDC5L       | CDC5L       | 5403.535869 | 6321.039965 | 4775.885423 |             |
| 5331.275141 |             |             |             |             |             |
| RASGRF1     | RASGRF1     | 4.685485254 | 12.18709505 | 20.53568232 |             |
| 4.713771124 |             |             |             |             |             |
| TSPAN6      | TSPAN6      | 0           | 0           | 134.8212187 | 70.70656685 |
| ALS2CR12    | ALS2CR12    |             | 22.25605496 | 45.70160643 |             |
| 29.46423985 | 44.30944856 |             |             |             |             |
| SZT2        | SZT2        | 903.1272827 | 456.0004731 | 888.3914743 |             |
| 1001.204987 |             |             |             |             |             |
| PLA2G2C     | PLA2G2C     | 2.342742627 | 0           | 0           | 4.713771124 |
| C7orf73     | C7orf73     | 4247.392383 | 3657.144106 | 2391.960562 |             |
| 3322.265888 |             |             |             |             |             |
| ZNF135      | ZNF135      | 16.39919839 | 8.124730032 | 99.10698859 |             |
| 116.9015239 |             |             |             |             |             |
| LRRC75A-AS1 | LRRC75A-AS1 |             | 3931.122128 | 6465.253923 |             |
| 7985.701855 | 5366.157047 |             |             |             |             |
| LY86-AS1    | LY86-AS1    |             | 0           | 2.031182508 | 16.07140355 |
|             |             |             |             |             |             |
|             |             | 4.713771124 |             |             |             |
| EFCAB10     | EFCAB10     | 383.0384195 | 429.5951005 | 312.4995136 |             |
| 490.2321969 |             |             |             |             |             |
| LINC00114   | LINC00114   |             | 1.171371313 | 1.015591254 | 0           |
|             |             | 0.942754225 |             |             |             |
| SOD1        | SOD1        | 20070.27608 | 23573.90419 | 23498.17771 |             |
| 19104.91436 |             |             |             |             |             |
| CSF3R       | CSF3R       | 0           | 1.015591254 | 21.42853807 | 0           |
| MIR765      | MIR765      | 0           | 0           | 3.571423012 | 0           |
| LOC253573   | LOC253573   |             | 2.342742627 | 16.24946006 |             |
| 46.42849916 | 10.37029647 |             |             |             |             |
| LINC00630   | LINC00630   |             | 140.5645576 | 123.902133  |             |
| 138.3926417 | 261.1429202 |             |             |             |             |
| PNPLA8      | PNPLA8      | 2545.389864 | 2182.505605 | 3153.56652  |             |

|             |          |             |             |             |
|-------------|----------|-------------|-------------|-------------|
| 2954.59174  |          |             |             |             |
| RDX         | RDX      | 3979.148352 | 3261.063517 | 1695.533075 |
| 2602.00166  |          |             |             |             |
| ZNF484      | ZNF484   | 563.4296018 | 522.0139046 | 1146.426787 |
| 776.8294812 |          |             |             |             |
| ITCH        | ITCH     | 3050.2509   | 2083.993253 | 1895.532764 |
| 2020.322304 |          |             |             |             |
| ZFR         | ZFR      | 7693.566787 | 7668.729559 | 8374.094108 |
| 8778.927341 |          |             |             |             |
| LDHA        | LDHA     | 130449.7663 | 150585.7776 | 76629.345   |
| 114124.1699 |          |             |             |             |
| HCN3        | HCN3     | 81.99599194 | 40.62365016 | 33.03566286 |
| 108.4167358 |          |             |             |             |
| MPC1        | MPC1     | 1404.474205 | 1655.413744 | 1788.390073 |
| 1639.449597 |          |             |             |             |
| CRIP2       | CRIP2    | 117.1371313 | 177.7284695 | 154.4640453 |
| 66.93554995 |          |             |             |             |
| TSSK4       | TSSK4    | 52.71170911 | 34.53010264 | 67.85703723 |
| 78.24860065 |          |             |             |             |
| WNT9A       | WNT9A    | 1.171371313 | 0           | 2.828262674 |
| MAD2L2      | MAD2L2   | 3243.527167 | 4503.13162  | 2706.245787 |
| 2634.055304 |          |             |             |             |
| PANK2       | PANK2    | 3637.107928 | 3919.166649 | 4120.5293   |
| 3362.80432  |          |             |             |             |
| MLX         | MLX      | 4671.428798 | 6171.748051 | 4646.421339 |
| 4523.33477  |          |             |             |             |
| WDR20       | WDR20    | 1807.425937 | 2038.291647 | 2548.210319 |
| 2002.409973 |          |             |             |             |
| KIAA1804    | KIAA1804 |             | 122.9939879 | 100.5435342 |
| 246.4281878 |          | 222.489997  |             |             |
| MAPT        | MAPT     | 7.028227881 | 2.031182508 | 14.28569205 |
| 4.713771124 |          |             |             |             |
| SBN01       | SBN01    | 6427.314397 | 6672.434539 | 7729.452254 |
| 6684.127453 |          |             |             |             |
| ZNF546      | ZNF546   | 248.3307185 | 284.3655511 | 750.8916883 |
| 606.1909665 |          |             |             |             |
| TAP1        | TAP1     | 24.59879758 | 811.457412  | 808.9273122 |
| 112.1877527 |          |             |             |             |
| EPO         | EPO      | 0           | 3.046773762 | 0           |
| MDK         | MDK      | 67.93953618 | 28.43655511 | 376.7851278 |
| 170.6385147 |          |             |             |             |
| ADAM11      | ADAM11   | 4.685485254 | 4.062365016 | 8.035701777 |
| 0.942754225 |          |             |             |             |
| NOV         | NOV      | 0           | 1.015591254 | 0           |
| NME3        | NME3     | 1194.79874  | 1401.515931 | 907.1414451 |
| 999.3194782 |          |             |             |             |
| GPNMB       | GPNMB    | 131.1935871 | 145.2295493 | 82.14272928 |
| 60.33627038 |          |             |             |             |
| NKX2-2      | NKX2-2   | 26.94154021 | 27.42096386 | 22.32139383 |
| 20.74059294 |          |             |             |             |

|                 |               |               |             |
|-----------------|---------------|---------------|-------------|
| POLR2E POLR2E   | 12683.60858   | 16612.02614   | 9680.342074 |
| 9884.778046     |               |               |             |
| UTS2 UTS2       | 18.74194102   | 5.07795627    | 14.28569205 |
| 35.82466054     |               |               |             |
| MALT1 MALT1     | 5531.215342   | 4226.890799   | 5438.384392 |
| 6192.952502     |               |               |             |
| GPR148 GPR148   | 0 0           | 8.92855753    | 0           |
| ZC3H12D ZC3H12D | 5785.402917   | 4302.044552   | 2699.995797 |
| 4226.367189     |               |               |             |
| SNORA18 SNORA18 | 24.59879758   | 17.26505132   | 29.46423985 |
| 16.02682182     |               |               |             |
| SNORD100        | SNORD100      | 8.199599194   | 5.07795627  |
| 8.035701777     | 34.88190631   |               |             |
| SNORD101        | SNORD101      | 0 2.031182508 | 0           |
| 12.25580492     |               |               |             |
| SNORD12C        | SNORD12C      | 78.481878     | 87.34084785 |
| 95.53556557     | 76.3630922    |               |             |
| AXDND1 AXDND1   | 0 3.046773762 | 40.17850889   | 0           |
| SNORA9 SNORA9   | 64.42542224   | 106.6370817   | 96.42842133 |
| 105.5884732     |               |               |             |
| NEK6 NEK6       | 487.2904664   | 629.6665775   | 917.8557141 |
| 605.2482123     |               |               |             |
| ST20-MTHFS      | ST20-MTHFS    | 1150.28663    | 1552.839027 |
| 1675.890248     | 1609.281462   |               |             |
| MTHFS MTHFS     | 1023.778528   | 1347.689594   | 1588.390385 |
| 1490.494429     |               |               |             |
| PPP2R5A PPP2R5A | 4717.112279   | 3025.446346   | 2632.13876  |
| 3757.81834      |               |               |             |
| SLC26A5 SLC26A5 | 10.54234182   | 1.015591254   | 5.357134518 |
| 8.484788022     |               |               |             |
| MIR6511B1       | MIR6511B1     | 22.25605496   | 11.17150379 |
| 15.1785478      | 18.85508449   |               |             |
| MIR6717 MIR6717 | 12.88508445   | 10.15591254   | 72.321316   |
| 41.48118589     |               |               |             |
| MIR6716 MIR6716 | 0 0           | 4.464278765   | 0           |
| MIR6514 MIR6514 | 16.39919839   | 2.031182508   | 6.249990271 |
| 13.19855915     |               |               |             |
| MIR6515 MIR6515 | 53.88308042   | 31.48332888   | 33.03566286 |
| 29.22538097     |               |               |             |
| MIR6513 MIR6513 | 154.6210134   | 205.1494333   | 137.499786  |
| 154.6116929     |               |               |             |
| GALNT2 GALNT2   | 8405.760545   | 3509.883374   | 2150.889509 |
| 3793.643        |               |               |             |
| HMBS HMBS       | 3063.135985   | 3701.830121   | 1723.211603 |
| 2297.492046     |               |               |             |
| BMP5 BMP5       | 0 0           | 0 2.828262674 |             |
| NDUFA12 NDUFA12 | 11072.97303   | 10652.53666   | 5038.385014 |
| 6588.909277     |               |               |             |
| SULF2 SULF2     | 59.73993699   | 166.5569657   | 133.0355072 |
| 41.48118589     |               |               |             |

|             |             |             |             |             |             |   |
|-------------|-------------|-------------|-------------|-------------|-------------|---|
| FAM155A-IT1 | FAM155A-IT1 | 0           | 0           | 0           | 1.885508449 |   |
| AMICA1      | AMICA1      | 9058.214367 | 7846.458029 | 7125.881765 |             |   |
| 9677.372117 |             |             |             |             |             |   |
| MIR7845     | MIR7845     | 4.685485254 | 0           | 0           |             |   |
| MIR7844     | MIR7844     | 3.51411394  | 2.031182508 | 0           | 2.828262674 |   |
| MIR6516     | MIR6516     | 49.19759517 | 25.38978135 | 29.46423985 |             |   |
| 30.16813519 |             |             |             |             |             |   |
| MIR1273H    | MIR1273H    |             | 19.91331233 | 19.29623383 |             |   |
| 45.5356434  | 33.93915209 |             |             |             |             |   |
| ATP11A-AS1  | ATP11A-AS1  |             | 14.05645576 | 17.26505132 |             |   |
| 4.464278765 | 10.37029647 |             |             |             |             |   |
| DLG3-AS1    | DLG3-AS1    |             | 29.28428284 | 19.29623383 |             |   |
| 14.28569205 | 8.484788022 |             |             |             |             |   |
| MIR7162     | MIR7162     | 0           | 0           | 0.942754225 |             |   |
| ATPAF1      | ATPAF1      | 5148.176923 | 6902.973754 | 5380.348768 |             |   |
| 5187.976499 |             |             |             |             |             |   |
| ATP11C      | ATP11C      | 703.9941594 | 415.3768229 | 732.1417175 |             |   |
| 763.630922  |             |             |             |             |             |   |
| MYBPHL      | MYBPHL      | 0           | 6.093547524 | 1.785711506 | 3.771016899 |   |
| USP6NL      | USP6NL      | 138.221815  | 206.1650246 | 532.1420288 |             |   |
| 494.945968  |             |             |             |             |             |   |
| ATXN2L      | ATXN2L      | 5786.574288 | 1998.683588 | 2593.745963 |             |   |
| 2752.842336 |             |             |             |             |             |   |
| CASP8AP2    | CASP8AP2    |             | 2190.464356 | 1634.086328 |             |   |
| 2748.210008 | 3083.749069 |             |             |             |             |   |
| ANAPC7      | ANAPC7      | 4177.110104 | 4179.15801  | 3430.351803 |             |   |
| 3431.625378 |             |             |             |             |             |   |
| EPHA1       | EPHA1       | 16.39919839 | 55.85751897 | 399.9993774 |             |   |
| 308.2806315 |             |             |             |             |             |   |
| TENM1       | TENM1       | 93.70970508 | 31.48332888 | 32.14280711 |             |   |
| 82.01961755 |             |             |             |             |             |   |
| PRPF40A     | PRPF40A     | 11028.46092 | 11592.97417 | 9952.663079 |             |   |
| 10647.46621 |             |             |             |             |             |   |
| MVK         | MVK         | 272.929516  | 184.8376082 | 119.6426709 |             |   |
| 120.6725408 |             |             |             |             |             |   |
| C1orf159    | C1orf159    |             | 1000.351102 | 1218.709505 |             |   |
| 1072.319759 | 932.3839282 |             |             |             |             |   |
| NCS1        | NCS1        | 128.8508445 | 244.7574922 | 79.46416202 |             |   |
| 202.6921583 |             |             |             |             |             |   |
| CELSR1      | CELSR1      | 11.71371313 | 8.124730032 | 55.35705669 |             |   |
| 29.22538097 |             |             |             |             |             |   |
| EIF2B2      | EIF2B2      | 3496.543371 | 3907.995146 | 2003.56831  |             |   |
| 2526.581322 |             |             |             |             |             |   |
| TMEM176B    | TMEM176B    |             | 0           | 0           | 23.21424958 | 0 |
| TEX101      | TEX101      | 4.685485254 | 0           | 0           | 3.771016899 |   |
| SMARCC2     | SMARCC2     | 9318.258799 | 6903.989345 | 7379.452799 |             |   |
| 8213.274806 |             |             |             |             |             |   |
| CASP9       | CASP9       | 1624.692012 | 1468.544953 | 548.2134324 |             |   |
| 892.7882508 |             |             |             |             |             |   |
| PXYLP1      | PXYLP1      | 400.6089892 | 380.8467203 | 1306.247967 |             |   |

|             |         |             |             |             |             |
|-------------|---------|-------------|-------------|-------------|-------------|
| 792.856303  |         |             |             |             |             |
| OR6K3       | OR6K3   | 0           | 0           | 0.892855753 | 0           |
| NPRL3       | NPRL3   | 1540.353277 |             | 1250.192834 | 759.8202458 |
| 1035.144139 |         |             |             |             |             |
| COMMD5      | COMMD5  | 1943.305009 |             | 2717.722196 | 2164.282345 |
| 1868.538873 |         |             |             |             |             |
| NR2C1       | NR2C1   | 1197.141482 |             | 986.1391077 | 735.7131405 |
| 1172.786256 |         |             |             |             |             |
| CAPN14      | CAPN14  | 30.45565415 |             | 7.109138778 | 0           |
| GAS6        | GAS6    | 85.51010588 |             | 82.26289158 | 34.88190631 |
| 87.6761429  |         |             |             |             | 39.28565313 |
| RASGRP4     | RASGRP4 | 522.4316058 |             | 1020.66921  | 92.85699832 |
| 198.9211414 |         |             |             |             |             |
| CACNA1D     | CACNA1D | 26.94154021 |             | 63.98224901 | 0           |
| SPG11       | SPG11   | 3541.055481 |             | 1956.028755 | 32.05364364 |
| 3136.543306 |         |             |             |             | 3188.387894 |
| TMEM189     | TMEM189 | 3223.613855 |             | 3634.801098 | 1925.889859 |
| 1872.30989  |         |             |             |             |             |
| TPBG        | TPBG    | 0           | 1.015591254 | 81.24987353 | 96.16093092 |
| YIPF4       | YIPF4   | 3385.263096 |             | 3258.016743 | 3450.887485 |
| 2849.946021 |         |             |             |             |             |
| CHCHD5      | CHCHD5  | 1233.453993 |             | 1295.89444  | 847.3201096 |
| 712.7221939 |         |             |             |             |             |
| KLHL4       | KLHL4   | 4.685485254 |             | 0           | 14.28569205 |
| TUBB4A      | TUBB4A  | 78.481878   |             | 125.9333155 | 16.02682182 |
| 124.4435577 |         |             |             |             | 224.106794  |
| KDM4A       | KDM4A   | 2380.226509 |             | 2413.04482  | 1730.354449 |
| 2202.273869 |         |             |             |             |             |
| PICK1       | PICK1   | 463.8630401 |             | 641.8536726 | 632.1418731 |
| 758.9171509 |         |             |             |             |             |
| CDK14       | CDK14   | 74.96776406 |             | 92.41880412 | 24.10710533 |
| 39.59567744 |         |             |             |             |             |
| GIPC2       | GIPC2   | 7.028227881 |             | 3.046773762 | 69.64274874 |
| 23.56885562 |         |             |             |             |             |
| CYR61       | CYR61   | 1.171371313 |             | 1.015591254 | 0           |
| MRPS28      | MRPS28  | 2179.922014 |             | 2821.312504 | 10.37029647 |
| 1937.359932 |         |             |             |             | 1664.283124 |
| POLR3D      | POLR3D  | 1246.339078 |             | 1505.106239 | 1780.354372 |
| 1603.624936 |         |             |             |             |             |
| IGFBP4      | IGFBP4  | 2548.903978 |             | 1900.171236 | 806.248745  |
| 1451.841506 |         |             |             |             |             |
| LETMD1      | LETMD1  | 933.5829368 |             | 913.0165374 | 1260.712323 |
| 1100.19418  |         |             |             |             |             |
| PSPC1       | PSPC1   | 2828.861722 |             | 3557.616163 | 2872.316958 |
| 2374.797892 |         |             |             |             |             |
| THEM6       | THEM6   | 1602.435957 |             | 1511.199786 | 1384.819273 |
| 1449.955998 |         |             |             |             |             |
| ZNF771      | ZNF771  | 200.3044946 |             | 243.741901  | 198.2139772 |
| 225.3182597 |         |             |             |             |             |
| TMEM245     | TMEM245 | 4840.106267 |             | 4926.633173 | 6151.776138 |



|             |             |             |             |               |
|-------------|-------------|-------------|-------------|---------------|
| 5087.101797 |             |             |             |               |
| GORASP1     | GORASP1     | 2874.545203 | 3050.836127 | 2344.639207   |
| 2759.441616 |             |             |             |               |
| C9orf24     | C9orf24     | 17.5705697  | 13.2026863  | 22.32139383   |
| 12.25580492 |             |             |             |               |
| HBP1        | HBP1        | 3669.906325 | 3863.30913  | 13323.19355   |
| 9095.69276  |             |             |             |               |
| STRIP2      | STRIP2      | 2751.551215 | 2588.742107 | 673.2132378   |
| 1141.675366 |             |             |             |               |
| TFDP2       | TFDP2       | 1545.038762 | 1465.49818  | 957.1413672   |
| 1291.573288 |             |             |             |               |
| ERGIC3      | ERGIC3      | 4344.616202 | 5522.78524  | 3522.315946   |
| 3586.237071 |             |             |             |               |
| RDH5        | RDH5        | 243.6452332 | 230.5392147 | 270.5352932   |
| 188.5508449 |             |             |             |               |
| COR01C      | COR01C      | 6956.774231 | 5664.968015 | 1947.318397   |
| 3862.464059 |             |             |             |               |
| AMACR       | AMACR       | 504.8610361 | 723.1009729 | 790.1773414   |
| 776.8294812 |             |             |             |               |
| ALG6        | ALG6        | 2311.115601 | 2250.550219 | 1530.354761   |
| 1833.656967 |             |             |             |               |
| DPP7        | DPP7        | 5332.082219 | 5586.767489 | 5772.312443   |
| 5837.534159 |             |             |             |               |
| ZFP69B      | ZFP69B      | 138.221815  | 101.5591254 | 295.5352543   |
| 119.7297865 |             |             |             |               |
| SIGIRR      | SIGIRR      | 1905.821127 | 1923.529835 | 1749.997276   |
| 1881.737433 |             |             |             |               |
| FMR1-AS1    | FMR1-AS1    |             | 74.96776406 | 77.18493531   |
| 149.9997665 | 54.67974503 |             |             |               |
| NUDT8       | NUDT8       | 195.6190093 | 253.8978135 | 326.7852056   |
| 268.684954  |             |             |             |               |
| WARS        | WARS        | 33436.79414 | 66966.05611 | 60854.36956   |
| 54545.87393 |             |             |             |               |
| C15orf62    | C15orf62    |             | 21.08468364 | 10.15591254   |
| 11.60712479 | 17.91233027 |             |             |               |
| HAUS2       | HAUS2       | 2018.272773 | 1805.72125  | 1660.711701   |
| 1376.421168 |             |             |             |               |
| C10orf131   | C10orf131   |             | 14.05645576 | 14.21827756   |
| 6.249990271 | 5.656525348 |             |             |               |
| TNP01       | TNP01       | 6620.590664 | 4769.216529 | 5036.599303   |
| 5996.859623 |             |             |             |               |
| S1PR4       | S1PR4       | 16100.4987  | 21325.38515 | 5801.776683   |
| 6810.456519 |             |             |             |               |
| SPIB        | SPIB        | 7.028227881 | 8.124730032 | 0 18.85508449 |
| SEMA3C      | SEMA3C      | 0 0         | 50.89277792 | 0             |
| SELPLG      | SELPLG      | 37495.59574 | 46470.40901 | 17373.18724   |
| 19578.17698 |             |             |             |               |
| SLC22A5     | SLC22A5     | 255.3589463 | 268.1160911 | 373.2137048   |
| 409.1553335 |             |             |             |               |
| RECQL       | RECQL       | 12423.56415 | 12753.79497 | 7513.381162   |

|                   |             |             |             |             |  |  |
|-------------------|-------------|-------------|-------------|-------------|--|--|
| 11315.87896       |             |             |             |             |  |  |
| HLA-DMB HLA-DMB   | 36.31251072 | 0           | 0           | 26.39711829 |  |  |
| S100A3 S100A3     | 3.51411394  | 0           | 0           | 0           |  |  |
| ALG13 ALG13       | 1418.530661 | 1486.825596 |             | 1770.532958 |  |  |
| 1449.955998       |             |             |             |             |  |  |
| C9orf153 C9orf153 | 4.685485254 |             |             | 6.093547524 |  |  |
| 14.28569205       | 7.542033798 |             |             |             |  |  |
| DYRK1A DYRK1A     | 277.6150013 | 142.1827756 |             | 293.7495427 |  |  |
| 432.7241891       |             |             |             |             |  |  |
| RHBDF2 RHBDF2     | 1628.206126 | 1743.770183 |             | 1619.640336 |  |  |
| 2044.833913       |             |             |             |             |  |  |
| PCBD2 PCBD2       | 1043.69184  | 1051.136948 |             | 548.2134324 |  |  |
| 651.4431693       |             |             |             |             |  |  |
| ARL6 ARL6         | 179.219811  | 240.6951272 |             | 313.3923693 |  |  |
| 253.6008864       |             |             |             |             |  |  |
| ZRANB3 ZRANB3     | 291.6714571 | 414.3612317 |             | 344.6423207 |  |  |
| 337.5060124       |             |             |             |             |  |  |
| RBL1 RBL1         | 5204.402746 | 3694.720982 |             | 2965.173956 |  |  |
| 3567.381986       |             |             |             |             |  |  |
| EIF5AL1 EIF5AL1   | 40.99799597 | 73.12257029 |             | 53.57134518 |  |  |
| 21.68334717       |             |             |             |             |  |  |
| GAB3 GAB3         | 661.8247921 | 344.2854351 |             | 569.6419704 |  |  |
| 625.9888052       |             |             |             |             |  |  |
| NOXRED1 NOXRED1   | 4.685485254 | 7.109138778 |             | 41.96422039 |  |  |
| 17.91233027       |             |             |             |             |  |  |
| HIGD1A HIGD1A     | 9714.182303 | 10075.68083 |             | 5810.705241 |  |  |
| 7110.252363       |             |             |             |             |  |  |
| MAP3K19 MAP3K19   | 4.685485254 | 2.031182508 | 0           | 15.0840676  |  |  |
| KCNIP4 KCNIP4     | 9.370970508 | 6.093547524 |             | 21.42853807 |  |  |
| 38.65292321       |             |             |             |             |  |  |
| SNORA28 SNORA28   | 23.42742627 | 11.17150379 |             | 26.78567259 |  |  |
| 28.28262674       |             |             |             |             |  |  |
| SNORD102 SNORD102 | 31.62702546 |             |             | 9.140321286 |  |  |
| 24.99996108       | 35.82466054 |             |             |             |  |  |
| SNORD58B SNORD58B | 158.1351273 |             |             | 222.4144846 |  |  |
| 285.713841        | 193.2646161 |             |             |             |  |  |
| NIPAL2 NIPAL2     | 80.82462063 | 63.98224901 |             | 34.82137437 |  |  |
| 72.5920753        |             |             |             |             |  |  |
| HRASLS5 HRASLS5   | 0           | 3.046773762 | 12.49998054 | 0           |  |  |
| ALDH3A1 ALDH3A1   | 2.342742627 | 0           | 0           | 0           |  |  |
| SIGLEC11 SIGLEC11 | 0           | 0           | 1.785711506 | 0           |  |  |
| TPTE2 TPTE2       | 1.171371313 | 2.031182508 |             | 8.92855753  |  |  |
| 3.771016899       |             |             |             |             |  |  |
| UPK3BL UPK3BL     | 712.1937586 | 771.8493531 |             | 933.9271177 |  |  |
| 859.7918529       |             |             |             |             |  |  |
| SRP54 SRP54       | 7014.171425 | 8312.614414 |             | 8363.379839 |  |  |
| 6598.336819       |             |             |             |             |  |  |
| EIF2S3 EIF2S3     | 5927.138846 | 6861.334512 |             | 6071.419121 |  |  |
| 5511.341198       |             |             |             |             |  |  |
| ZNF345 ZNF345     | 270.5867734 | 253.8978135 |             | 692.8560644 |  |  |

|             |          |             |             |             |
|-------------|----------|-------------|-------------|-------------|
| 626.9315594 |          |             |             |             |
| MIB2        | MIB2     | 631.369138  | 646.9316288 | 1268.748025 |
| 1072.854308 |          |             |             |             |
| ADCK4       | ADCK4    | 1118.659604 | 1123.243927 | 761.6059573 |
| 904.1013015 |          |             |             |             |
| DDX3Y       | DDX3Y    | 6748.270137 | 0           | 0.892855753 |
| ADAD2       | ADAD2    | 2.342742627 | 23.35859884 | 7782.436125 |
| 5.656525348 |          |             |             | 28.5713841  |
| PLIN3       | PLIN3    | 4315.331919 | 5588.798671 | 2007.139733 |
| 3133.715043 |          |             |             |             |
| XIAP        | XIAP     | 715.7078725 | 483.4214369 | 773.2130821 |
| 730.6345242 |          |             |             |             |
| SPG20       | SPG20    | 2564.131805 | 2480.073842 | 6122.311899 |
| 5303.935268 |          |             |             |             |
| SEMA7A      | SEMA7A   | 290.5000857 | 77.18493531 | 142.8569205 |
| 282.8262674 |          |             |             |             |
| NFE2L2      | NFE2L2   | 6256.294185 | 7950.048337 | 12780.33725 |
| 9884.778046 |          |             |             |             |
| LSM2        | LSM2     | 1.171371313 | 0           | 0.892855753 |
| ZNF696      | ZNF696   | 333.8408243 | 295.5370549 | 0           |
| 673.1265164 |          |             |             | 649.1061325 |
| SNAPC5      | SNAPC5   | 1772.284797 | 2082.977662 | 2195.532297 |
| 2011.837516 |          |             |             |             |
| SUCLG1      | SUCLG1   | 5251.257598 | 6414.474361 | 3833.029748 |
| 4213.16863  |          |             |             |             |
| MAMLD1      | MAMLD1   | 1364.64758  | 673.3370014 | 351.7851667 |
| 343.1625378 |          |             |             |             |
| POFUT2      | POFUT2   | 475.5767533 | 254.9134048 | 472.3206934 |
| 361.0748681 |          |             |             |             |
| TM2D3       | TM2D3    | 2297.059146 | 2536.946953 | 2978.566792 |
| 2523.75306  |          |             |             |             |
| TSEN34      | TSEN34   | 1287.337073 | 1404.562704 | 2626.781625 |
| 1913.791076 |          |             |             |             |
| PVRIG       | PVRIG    | 3851.468879 | 5643.640599 | 3269.637768 |
| 4510.136211 |          |             |             |             |
| SPATA5L1    | SPATA5L1 |             | 842.2159744 | 1074.495547 |
| 1245.533775 |          |             |             |             |
| SMAD4       | SMAD4    | 4742.882448 | 3892.761277 | 6748.203781 |
| 5846.961702 |          |             |             |             |
| GSC2        | GSC2     | 0           | 1.015591254 | 0           |
| SOX15       | SOX15    | 49.19759517 | 62.96665775 | 0           |
| 28.28262674 |          |             |             | 25.89281684 |
| ATE1        | ATE1     | 3050.2509   | 2878.185614 | 2478.56757  |
| 2475.672594 |          |             |             |             |
| MRPL28      | MRPL28   | 5319.197134 | 8803.14499  | 3698.208529 |
| 3952.02571  |          |             |             |             |
| SIVA1       | SIVA1    | 6567.878955 | 9943.653968 | 6624.989687 |
| 5269.053362 |          |             |             |             |
| FBX09       | FBX09    | 3904.180588 | 4278.685953 | 3589.280127 |
| 4297.073756 |          |             |             |             |

|              |              |               |               |               |
|--------------|--------------|---------------|---------------|---------------|
| SDF2         | SDF2         | 2905.000857   | 4058.302651   | 3018.745301   |
| 2961.19102   |              |               |               |               |
| SIRT5        | SIRT5        | 687.594961    | 774.8961268   | 811.6058795   |
| 929.5556656  |              |               |               |               |
| LOC101927131 | LOC101927131 |               | 1.171371313   | 2.031182508   |
| 5.357134518  | 0            |               |               |               |
| LGALS9       | LGALS9       | 3744.874089   | 2373.436761   | 758.0345343   |
| 1044.571681  |              |               |               |               |
| TR0          | TR0          | 18.74194102   | 24.3741901    | 390.1779641   |
| 120.6725408  |              |               |               |               |
| CLIP2        | CLIP2        | 53.88308042   | 23.35859884   | 59.82133545   |
| 64.10728728  |              |               |               |               |
| MYBPC2       | MYBPC2       | 3.51411394    | 2.031182508   | 0 0.942754225 |
| SSH1         | SSH1         | 2627.385856   | 1396.437974   | 1507.140511   |
| 1717.698197  |              |               |               |               |
| RAB1B        | RAB1B        | 2717.581447   | 946.5310488   | 514.2849137   |
| 820.1961755  |              |               |               |               |
| ACRV1        | ACRV1        | 24.59879758   | 17.26505132   | 7.142846024   |
| 4.713771124  |              |               |               |               |
| MSH3         | MSH3         | 2361.484568   | 2155.084641   | 1092.855442   |
| 1636.621334  |              |               |               |               |
| STX18        | STX18        | 1622.349269   | 1923.529835   | 1461.604868   |
| 1752.580104  |              |               |               |               |
| CCDC132      | CCDC132      | 1629.377497   | 1615.805685   | 2074.103914   |
| 1868.538873  |              |               |               |               |
| ACADVL       | ACADVL       | 17102.02118   | 21376.16472   | 11117.83984   |
| 13681.24931  |              |               |               |               |
| RPL3L        | RPL3L        | 1.171371313   | 1.015591254   | 0 2.828262674 |
| PLCL1        | PLCL1        | 311.5847694   | 336.1607051   | 1254.462333   |
| 1235.950789  |              |               |               |               |
| CLTA         | CLTA         | 6966.145201   | 8656.89985    | 4916.956632   |
| 5255.854803  |              |               |               |               |
| SMTN         | SMTN         | 1218.226166   | 1469.560545   | 459.8207128   |
| 603.3627038  |              |               |               |               |
| CNRIP1       | CNRIP1       | 2.342742627   | 0 1.785711506 | 0             |
| ZNF521       | ZNF521       | 0 1.015591254 | 0 0           |               |
| MTMR9        | MTMR9        | 973.4095615   | 814.5041857   | 1276.783727   |
| 1408.474812  |              |               |               |               |
| CNOT6        | CNOT6        | 3248.212652   | 1957.044347   | 1834.818572   |
| 2001.467219  |              |               |               |               |
| PHF12        | PHF12        | 1268.595132   | 512.8735833   | 922.3199929   |
| 891.8454966  |              |               |               |               |
| PLEKHN1      | PLEKHN1      | 67.93953618   | 84.29407409   | 67.85703723   |
| 88.61889712  |              |               |               |               |
| TMBIM6       | TMBIM6       | 65492.54151   | 91492.58489   | 79614.16179   |
| 70902.65973  |              |               |               |               |
| CEP44        | CEP44        | 1213.540681   | 935.359545    | 998.2127319   |
| 1255.748627  |              |               |               |               |
| ETV3         | ETV3         | 147.5927855   | 113.7462205   | 119.6426709   |
| 106.5312274  |              |               |               |               |

|               |               |             |             |             |             |
|---------------|---------------|-------------|-------------|-------------|-------------|
| PGAM1         | PGAM1         | 26688.52401 | 34299.56342 | 18183.90027 |             |
| 24487.09823   |               |             |             |             |             |
| ADAMTS4       | ADAMTS4       | 62.08267961 | 138.1204106 | 0           | 15.0840676  |
| CPNE9         | CPNE9         | 0           | 1.015591254 | 0           | 1.885508449 |
| MYT1L         | MYT1L         | 2.342742627 | 0           | 0           | 12.25580492 |
| CHSY1         | CHSY1         | 658.3106782 | 555.528416  |             | 361.60658   |
| 623.1605425   |               |             |             |             |             |
| ZNF607        | ZNF607        | 148.7641568 | 222.4144846 |             | 602.6776333 |
| 536.4271539   |               |             |             |             |             |
| TFPT          | TFPT          | 1010.893444 | 1365.970237 |             | 740.1774193 |
| 643.9011355   |               |             |             |             |             |
| LPAR3         | LPAR3         | 0           | 0           | 49.99992217 | 21.68334717 |
| PRDX1         | PRDX1         | 29652.09343 | 35872.71428 |             | 20457.11101 |
| 20595.40879   |               |             |             |             |             |
| VIPR1-AS1     | VIPR1-AS1     |             | 11.71371313 |             | 10.15591254 |
| 97.32127708   |               | 63.16453306 |             |             |             |
| BAGE4         | BAGE4         | 0           | 0           | 0.942754225 |             |
| YIF1B         | YIF1B         | 3264.611851 | 4196.423062 |             | 1955.354099 |
| 1920.390356   |               |             |             |             |             |
| CTD-2201I18.1 | CTD-2201I18.1 |             | 19.91331233 |             | 9.140321286 |
| 34.82137437   |               | 108.4167358 |             |             |             |
| LOC101928796  | LOC101928796  |             | 5.856856567 |             | 2.031182508 |
| 1.885508449   |               |             |             |             | 0           |
| MRPL11        | MRPL11        | 3877.239048 | 5358.259456 |             | 2838.388439 |
| 3115.802713   |               |             |             |             |             |
| KIF27         | KIF27         | 173.3629544 | 137.1048193 |             | 357.1423012 |
| 172.5240231   |               |             |             |             |             |
| MLNR          | MLNR          | 0           | 0           | 3.771016899 |             |
| MDM2          | MDM2          | 11372.84408 | 7979.500483 |             | 6671.418187 |
| 5487.772342   |               |             |             |             |             |
| MEST          | MEST          | 158.1351273 | 232.5703972 |             | 416.9636367 |
| 247.0016069   |               |             |             |             |             |
| KRT1          | KRT1          | 23.42742627 | 3.046773762 |             | 4.464278765 |
| 191.3791076   |               |             |             |             |             |
| HLA-DMA       | HLA-DMA       | 183.9052962 | 249.8354485 |             | 109.8212576 |
| 134.8138541   |               |             |             |             |             |
| KIF26B        | KIF26B        | 4.685485254 | 1.015591254 |             | 0.892855753 |
| 3.771016899   |               |             |             |             |             |
| CLIC5         | CLIC5         | 856.2724301 | 300.6150112 |             | 485.7135296 |
| 773.0584643   |               |             |             |             |             |
| TRDN          | TRDN          | 0           | 0           | 0.942754225 |             |
| DEK           | DEK           | 9708.325446 | 8023.170907 |             | 9708.020603 |
| 10597.50024   |               |             |             |             |             |
| USP7          | USP7          | 2233.805095 | 1825.017484 |             | 1750.890132 |
| 1724.297477   |               |             |             |             |             |
| FZD5          | FZD5          | 9.370970508 | 9.140321286 |             | 58.03562395 |
| 10.37029647   |               |             |             |             |             |
| IL4           | IL4           | 45.68348122 | 119.839768  |             | 10.71426904 |
| 60.33627038   |               |             |             |             |             |
| IL2           | IL2           | 40.99799597 | 116.7929942 |             | 1699.997354 |

|             |          |             |             |   |             |   |
|-------------|----------|-------------|-------------|---|-------------|---|
| 131.9855915 |          |             |             |   |             |   |
| ALPL        | ALPL     | 3.51411394  | 0           | 0 | 0           |   |
| ALB         | ALB      | 0           | 0           | 0 | 0.942754225 |   |
| ZNF81       | ZNF81    | 169.8488405 | 134.0580455 |   | 196.4282657 |   |
| 189.4935992 |          |             |             |   |             |   |
| C4A         | C4A      | 0           | 0           | 0 | 1.885508449 |   |
| PCDHGA3     | PCDHGA3  | 1.171371313 | 14.21827756 |   | 9.821413283 |   |
| 16.96957604 |          |             |             |   |             |   |
| RTFDC1      | RTFDC1   | 8425.673858 | 10294.03295 |   | 7236.595878 |   |
| 7554.289603 |          |             |             |   |             |   |
| PRND        | PRND     | 1.171371313 | 1.015591254 |   | 12.49998054 | 0 |
| CPSF3       | CPSF3    | 7160.592839 | 8617.291791 |   | 5066.063543 |   |
| 5693.292763 |          |             |             |   |             |   |
| MMRN1       | MMRN1    | 14.05645576 | 28.43655511 |   | 24.10710533 |   |
| 16.96957604 |          |             |             |   |             |   |
| DNA2        | DNA2     | 2561.789063 | 2365.312031 |   | 837.4986963 |   |
| 1231.237017 |          |             |             |   |             |   |
| AIF1L       | AIF1L    | 9.370970508 | 25.38978135 |   | 24.99996108 |   |
| 16.02682182 |          |             |             |   |             |   |
| SEC23B      | SEC23B   | 9568.93226  | 12917.30516 |   | 7902.66627  |   |
| 9162.62831  |          |             |             |   |             |   |
| OGG1        | OGG1     | 2174.065158 | 2114.460991 |   | 1330.355072 |   |
| 1960.928787 |          |             |             |   |             |   |
| NFRKB       | NFRKB    | 2627.385856 | 2722.800152 |   | 3864.279699 |   |
| 3078.092544 |          |             |             |   |             |   |
| WDR89       | WDR89    | 1255.710048 | 1303.003579 |   | 2638.38875  |   |
| 2325.774672 |          |             |             |   |             |   |
| DTD2        | DTD2     | 469.7198967 | 376.7843553 |   | 461.6064243 |   |
| 559.0532553 |          |             |             |   |             |   |
| NEU1        | NEU1     | 0           | 2.031182508 | 0 | 0           |   |
| ZBTB14      | ZBTB14   | 1302.564901 | 1247.14606  |   | 1308.033678 |   |
| 1691.301079 |          |             |             |   |             |   |
| RANGRF      | RANGRF   | 3214.242884 | 4469.617109 |   | 2699.995797 |   |
| 2721.731447 |          |             |             |   |             |   |
| SCOC        | SCOC     | 2655.498768 | 2537.962544 |   | 3125.887991 |   |
| 3541.927622 |          |             |             |   |             |   |
| HNRNPD      | HNRNPD   | 22147.11742 | 22209.96513 |   | 14974.97669 |   |
| 18477.04005 |          |             |             |   |             |   |
| PTPRC       | PTPRC    | 67380.79206 | 50480.97887 |   | 52793.66782 |   |
| 82934.08915 |          |             |             |   |             |   |
| PLGRKT      | PLGRKT   | 1673.889607 | 1450.264311 |   | 962.4985018 |   |
| 1300.058076 |          |             |             |   |             |   |
| BATF3       | BATF3    | 497.8328082 | 330.0671576 |   | 799.9987547 |   |
| 872.9904121 |          |             |             |   |             |   |
| KIAA1407    | KIAA1407 |             | 98.39519033 |   | 103.5903079 |   |
| 229.4639285 |          | 181.9515654 |             |   |             |   |
| ADIPOR2     | ADIPOR2  | 609.113083  | 388.9714503 |   | 231.24964   |   |
| 338.4487667 |          |             |             |   |             |   |
| SMPD3       | SMPD3    | 125.3367305 | 309.7553325 |   | 658.03469   |   |
| 298.8530892 |          |             |             |   |             |   |

|             |          |             |             |             |
|-------------|----------|-------------|-------------|-------------|
| FAM13A      | FAM13A   | 53.88308042 | 438.7354217 | 2527.674637 |
| 276.2269878 |          |             |             |             |
| CYTL1       | CYTL1    | 0           | 3.046773762 | 0           |
| ZNF395      | ZNF395   | 473.2340106 | 304.6773762 | 0.942754225 |
| 1103.022443 |          |             |             | 971.4270593 |
| ACP6        | ACP6     | 555.2300026 | 503.733262  | 462.4992801 |
| 639.1873644 |          |             |             |             |
| ABL2        | ABL2     | 245.9879758 | 143.1983668 | 416.0707809 |
| 450.6365194 |          |             |             |             |
| COQ10B      | COQ10B   | 3452.031261 | 3904.948372 | 4387.49317  |
| 4046.301132 |          |             |             |             |
| CD101       | CD101    | 828.1595186 | 1156.758438 | 604.4633448 |
| 389.3574948 |          |             |             |             |
| GBAP1       | GBAP1    | 340.8690522 | 300.6150112 | 216.963948  |
| 289.425547  |          |             |             |             |
| LM02        | LM02     | 0           | 3.046773762 | 7.142846024 |
| ZFAND5      | ZFAND5   | 8474.871453 | 10057.40019 | 1.885508449 |
| 10105.38253 |          |             |             | 9898.198878 |
| TMEM38A     | TMEM38A  | 128.8508445 | 258.9757698 | 102.6784116 |
| 78.24860065 |          |             |             |             |
| ZFYVE21     | ZFYVE21  | 983.9519033 | 1165.89876  | 1563.390424 |
| 1169.957993 |          |             |             |             |
| BAIAP2      | BAIAP2   | 131.1935871 | 157.4166444 | 349.1065994 |
| 168.7530062 |          |             |             |             |
| TTLL2       | TTLL2    | 0           | 0           | 4.713771124 |
| FLRT1       | FLRT1    | 10.54234182 | 9.140321286 | 6.249990271 |
| 5.656525348 |          |             |             |             |
| C7orf25     | C7orf25  | 879.6998564 | 996.2950202 | 880.3557725 |
| 945.5824874 |          |             |             |             |
| KCTD15      | KCTD15   | 55.05445173 | 12.18709505 | 38.39279738 |
| 51.85148236 |          |             |             |             |
| VPS41       | VPS41    | 4570.690865 | 4775.310077 | 3713.387077 |
| 4615.724684 |          |             |             |             |
| RP1L1       | RP1L1    | 0           | 0           | 26.78567259 |
| STARD13     | STARD13  | 101.9093043 | 73.12257029 | 0           |
| 17.91233027 |          |             |             | 5.357134518 |
| RAP2A       | RAP2A    | 1895.278785 | 730.2101117 | 634.8204404 |
| 746.661346  |          |             |             |             |
| SIRT2       | SIRT2    | 3812.813625 | 5105.377234 | 2812.495622 |
| 2821.663395 |          |             |             |             |
| VDAC1       | VDAC1    | 16357.02902 | 20925.2422  | 11274.98245 |
| 14702.25213 |          |             |             |             |
| TMEM184C    | TMEM184C |             | 2773.80727  | 3080.288274 |
| 3115.173722 |          | 3261.929618 |             |             |
| KLHL21      | KLHL21   | 3607.823645 | 4041.0376   | 10970.51864 |
| 6173.154663 |          |             |             |             |
| PRKG2       | PRKG2    | 35.1411394  | 42.65483267 | 233.0353515 |
| 102.7602105 |          |             |             |             |
| DNAJC3      | DNAJC3   | 2815.976638 | 2236.331941 | 2434.817639 |
| 2667.051702 |          |             |             |             |

|             |         |             |             |             |
|-------------|---------|-------------|-------------|-------------|
| TXNDC9      | TXNDC9  | 3905.351959 | 4215.719296 | 2729.460037 |
| 3187.452034 |         |             |             |             |
| XP05        | XP05    | 5797.11663  | 5370.446551 | 3635.708626 |
| 4014.247489 |         |             |             |             |
| TMEM60      | TMEM60  | 1359.962095 | 1713.302446 | 1283.926573 |
| 1283.0885   |         |             |             |             |
| DENND1A     | DENND1A | 600.9134838 | 628.6509863 | 395.5350986 |
| 495.8887222 |         |             |             |             |
| DEPDC7      | DEPDC7  | 69.11090749 | 60.93547524 | 207.1425347 |
| 100.874702  |         |             |             |             |
| C9orf66     | C9orf66 | 350.2400227 | 414.3612317 | 99.10698859 |
| 169.6957604 |         |             |             |             |
| C4orf45     | C4orf45 | 0           | 1.015591254 | 0           |
| CLN8        | CLN8    | 695.7945602 | 710.9138778 | 795.5344759 |
| 818.3106671 |         |             |             |             |
| UNC50       | UNC50   | 2114.325221 | 2666.942633 | 2941.06685  |
| 2641.597338 |         |             |             |             |
| SCN5A       | SCN5A   | 0           | 1.015591254 | 13.3928363  |
| DCAF13      | DCAF13  | 7414.780414 | 8811.26972  | 6003.562083 |
| 7102.710329 |         |             |             |             |
| PDC         | PDC     | 1.171371313 | 0           | 0           |
| GPR135      | GPR135  | 8.199599194 | 10.15591254 | 33.03566286 |
| 4.713771124 |         |             |             |             |
| EAPP        | EAPP    | 2560.617691 | 3105.678055 | 4796.421105 |
| 3938.827151 |         |             |             |             |
| FER         | FER     | 176.8770683 | 249.8354485 | 213.392525  |
| 346.9335547 |         |             |             |             |
| BCAN        | BCAN    | 19.91331233 | 38.59246765 | 9.821413283 |
| 32.05364364 |         |             |             |             |
| TEAD4       | TEAD4   | 16.39919839 | 26.40537261 | 38.39279738 |
| 16.96957604 |         |             |             |             |
| CCDC62      | CCDC62  | 26.94154021 | 19.29623383 | 44.64278765 |
| 26.39711829 |         |             |             |             |
| DENND5A     | DENND5A | 918.3551098 | 1873.765864 | 6441.061402 |
| 4031.217065 |         |             |             |             |
| TIGD6       | TIGD6   | 513.0606353 | 555.528416  | 765.1773803 |
| 726.8635073 |         |             |             |             |
| EFHD1       | EFHD1   | 18.74194102 | 96.48116913 | 241.9639091 |
| 83.905126   |         |             |             |             |
| RAB5C       | RAB5C   | 2025.301001 | 1650.335788 | 1271.426592 |
| 1421.673371 |         |             |             |             |
| GAS7        | GAS7    | 21.08468364 | 8.124730032 | 27.67852834 |
| 33.93915209 |         |             |             |             |
| RASSF6      | RASSF6  | 3.51411394  | 0           | 57.14276819 |
| CADPS       | CADPS   | 0           | 0           | 15.0840676  |
| DNM1L       | DNM1L   | 6497.596676 | 2.678567259 | 0           |
| 4793.905233 |         |             | 6145.342678 | 4333.921825 |
| DGKG        | DGKG    | 28.11291152 | 79.21611782 | 0           |
| ZNF578      | ZNF578  | 15.22782708 | 8.124730032 | 28.28262674 |
| 32.05364364 |         |             |             | 60.71419121 |



|             |           |             |             |             |
|-------------|-----------|-------------|-------------|-------------|
| FNDC3A      | FNDC3A    | 2169.379673 | 1388.313244 | 3435.708938 |
| 3589.065333 |           |             |             |             |
| SON         | SON       | 13856.15127 | 9628.82068  | 14172.29937 |
| 14802.18408 |           |             |             |             |
| IGFL2       | IGFL2     | 0           | 5.07795627  | 0           |
| ATE1-AS1    | ATE1-AS1  |             | 66.76816487 | 46.71719769 |
| 70.53560449 |           | 51.85148236 |             |             |
| PAK6        | PAK6      | 680.5667331 | 704.8203303 | 268.7495817 |
| 436.495206  |           |             |             |             |
| PAK1        | PAK1      | 2160.008702 | 3476.368863 | 1289.283707 |
| 1215.210196 |           |             |             |             |
| CBX5        | CBX5      | 14747.56484 | 9572.963161 | 5764.276742 |
| 6817.998553 |           |             |             |             |
| UBAP2L      | UBAP2L    | 15250.08313 | 14982.00218 | 11222.30396 |
| 12083.2809  |           |             |             |             |
| ZNF566      | ZNF566    | 353.7541367 | 248.8198572 | 946.4270982 |
| 792.856303  |           |             |             |             |
| SMIM8       | SMIM8     | 497.8328082 | 450.9225168 | 462.4992801 |
| 774.9439727 |           |             |             |             |
| KPRP        | KPRP      | 0           | 0           | 6.249990271 |
| ZDHHC19     | ZDHHC19   | 3.51411394  | 0           | 0.892855753 |
| CHST4       | CHST4     | 3.51411394  | 0           | 0           |
| MAGEA8      | MAGEA8    | 5.856856567 | 0           | 12.49998054 |
| ARMC10      | ARMC10    | 1942.133638 | 2329.766337 | 2511.603233 |
| 2667.994456 |           |             |             |             |
| LATS2       | LATS2     | 89.02421982 | 19.29623383 | 13.3928363  |
| 30.16813519 |           |             |             |             |
| BCAR1       | BCAR1     | 15.22782708 | 4.062365016 | 36.60708587 |
| 27.33987252 |           |             |             |             |
| DHX34       | DHX34     | 1579.008531 | 2090.086801 | 2761.602844 |
| 2130.624548 |           |             |             |             |
| OR3A1       | OR3A1     | 39.82662466 | 14.21827756 | 24.10710533 |
| 65.05004151 |           |             |             |             |
| SPOCK3      | SPOCK3    | 2.342742627 | 1.015591254 | 0           |
| AP4S1       | AP4S1     | 358.4396219 | 329.0515663 | 2.828262674 |
| 473.2626208 |           |             |             | 523.2134713 |
| ZNF883      | ZNF883    | 9.370970508 | 7.109138778 | 15.1785478  |
| 30.16813519 |           |             |             |             |
| MATN4       | MATN4     | 37.48388203 | 76.16934405 | 45.5356434  |
| 16.96957604 |           |             |             |             |
| MPDZ        | MPDZ      | 1.171371313 | 0           | 3.571423012 |
| HSD17B10    | HSD17B10  |             | 6075.903003 | 0           |
| 4505.35013  |           | 4237.68024  |             | 10205.67651 |
| SNORD81     | SNORD81   | 31.62702546 | 33.51451138 | 76.78559476 |
| 62.22177883 |           |             |             |             |
| LINC00634   | LINC00634 |             | 7.028227881 | 0           |
| LINC00304   | LINC00304 |             | 0           | 1.015591254 |
| RPL13AP20   | RPL13AP20 |             | 1.171371313 | 0           |
|             |           | 3.771016899 |             | 1.785711506 |
| RBP3        | RBP3      | 0           | 0           | 0           |
|             |           |             | 0           | 0.942754225 |

|             |             |             |             |             |
|-------------|-------------|-------------|-------------|-------------|
| RAF1        | RAF1        | 8863.766729 | 9836.001295 | 10763.3761  |
| 9083.436955 |             |             |             |             |
| PMF1-BGLAP  | PMF1-BGLAP  | 2423.210514 | 2885.087545 | 3642.925828 |
| 3078.092544 |             |             |             |             |
| LETM2       | LETM2       | 496.6614369 | 446.8601518 | 245.5353321 |
| 345.9908005 |             |             |             |             |
| CCER2       | CCER2       | 9.370970508 | 9.140321286 | 9.821413283 |
| 6.599279573 |             |             |             |             |
| LRR63       | LRR63       | 46.85485254 | 19.29623383 | 38.39279738 |
| 103.7029647 |             |             |             |             |
| RANBP6      | RANBP6      | 2034.671971 | 1738.692227 | 1700.89021  |
| 2845.23225  |             |             |             |             |
| MUC6        | MUC6        | 1.171371313 | 0           | 0           |
| LAMC3       | LAMC3       | 4.685485254 | 25.38978135 | 7.142846024 |
| 7.542033798 |             |             |             |             |
| MTHFR       | MTHFR       | 564.6009731 | 512.8735833 | 1103.569711 |
| 952.181767  |             |             |             |             |
| MTHFD1      | MTHFD1      | 18779.4249  | 24516.37287 | 9068.735884 |
| 12696.07114 |             |             |             |             |
| CACNA1C-AS1 | CACNA1C-AS1 | 101.7855558 | 14.05645576 | 12.18709505 |
| 119.7297865 |             |             |             |             |
| NABP1       | NABP1       | 1841.395705 | 666.2278627 | 1238.390929 |
| 2229.613741 |             |             |             |             |
| DIP2A-IT1   | DIP2A-IT1   | 12.49998054 | 14.05645576 | 9.140321286 |
| 16.02682182 |             |             |             |             |
| MTUS2-AS1   | MTUS2-AS1   | 0           | 0           | 8.035701777 |
| 0           |             |             |             | 0           |
| CRB1        | CRB1        | 0           | 12.18709505 | 6.249990271 |
| 18.85508449 |             |             |             |             |
| DHRS4L2     | DHRS4L2     | 823.4740334 | 724.1165641 | 423.2136269 |
| 783.4287607 |             |             |             |             |
| STK35       | STK35       | 2211.54904  | 1311.128309 | 2100.889587 |
| 1830.828704 |             |             |             |             |
| HAUS4       | HAUS4       | 2990.510963 | 3086.381821 | 1766.068679 |
| 2171.16298  |             |             |             |             |
| TPP1        | TPP1        | 9431.881816 | 9585.150256 | 12447.30205 |
| 13566.23329 |             |             |             |             |
| CUX1        | CUX1        | 1009.722072 | 893.7203036 | 863.3915132 |
| 1158.644942 |             |             |             |             |
| COMMD9      | COMMD9      | 1985.474376 | 2572.492647 | 1994.639752 |
| 2001.467219 |             |             |             |             |
| CCDC59      | CCDC59      | 1293.19393  | 1461.435815 | 1817.854313 |
| 1429.215405 |             |             |             |             |
| RAB6C       | RAB6C       | 4.685485254 | 2.031182508 | 0.892855753 |
| 0           |             |             |             | 0           |
| BC02        | BC02        | 10.54234182 | 0           | 20.53568232 |
| 11.3130507  |             |             |             |             |
| DEFB121     | DEFB121     | 0           | 7.142846024 | 0           |
| 0           |             |             |             |             |
| PPIAL4G     | PPIAL4G     | 0           | 1.015591254 | 1.785711506 |
| 1.885508449 |             |             |             |             |
| SMC02       | SMC02       | 4.685485254 | 10.15591254 | 0           |
| 2.828262674 |             |             |             |             |
| AARSD1      | AARSD1      | 1515.75448  | 2325.703972 | 2037.496828 |
| 1740.324299 |             |             |             |             |
| PTGES3L     | PTGES3L     | 16.39919839 | 6.093547524 | 0.892855753 |
| 24.51160984 |             |             |             |             |

|              |              |             |             |             |             |   |
|--------------|--------------|-------------|-------------|-------------|-------------|---|
| ACSS1        | ACSS1        | 5353.166903 | 6523.142625 | 4555.350052 |             |   |
| 4438.48689   |              |             |             |             |             |   |
| EPB41L2      | EPB41L2      | 3277.496935 | 3228.564597 | 1820.53288  |             |   |
| 2079.71582   |              |             |             |             |             |   |
| PLP1         | PLP1         | 0           | 0           | 1.885508449 |             |   |
| PAFAH1B1     | PAFAH1B1     |             | 4694.856224 | 3664.253245 |             |   |
| 3672.315712  |              | 3647.516095 |             |             |             |   |
| KPNA5        | KPNA5        | 233.1028914 | 184.8376082 | 1243.748064 |             |   |
| 796.6273199  |              |             |             |             |             |   |
| PARD3        | PARD3        | 161.6492413 | 16.24946006 | 27.67852834 |             |   |
| 221.5472428  |              |             |             |             |             |   |
| ALDH8A1      | ALDH8A1      | 37.48388203 | 12.18709505 | 27.67852834 |             |   |
| 8.484788022  |              |             |             |             |             |   |
| CDADC1       | CDADC1       | 456.8348122 | 587.0117448 | 610.7133351 |             |   |
| 435.5524518  |              |             |             |             |             |   |
| MICAL1       | MICAL1       | 5260.628569 | 3439.807577 | 1636.604595 |             |   |
| 3182.738263  |              |             |             |             |             |   |
| TEF          | TEF          | 315.0988833 | 233.5859884 | 357.1423012 |             |   |
| 217.7762259  |              |             |             |             |             |   |
| LMLN         | LMLN         | 312.7561407 | 413.3456404 | 695.5346316 |             |   |
| 388.4147406  |              |             |             |             |             |   |
| ARRB1        | ARRB1        | 701.6514168 | 742.3972067 | 671.4275263 |             |   |
| 576.9655855  |              |             |             |             |             |   |
| KRTAP21-3    | KRTAP21-3    |             | 2.342742627 | 0           | 0           | 0 |
| TBC1D8       | TBC1D8       | 38.65525334 | 122.8865417 | 248.2138993 |             |   |
| 141.4131337  |              |             |             |             |             |   |
| EXOC1        | EXOC1        | 2557.103577 | 2712.64424  | 2561.603155 |             |   |
| 3120.516484  |              |             |             |             |             |   |
| SNORD116-23  | SNORD116-23  |             | 0           | 0           | 3.571423012 |   |
| 1.885508449  |              |             |             |             |             |   |
| SNORD116-22  | SNORD116-22  |             | 8.199599194 | 3.046773762 |             | 0 |
| 6.599279573  |              |             |             |             |             |   |
| SNORD116-21  | SNORD116-21  |             | 0           | 4.062365016 | 0           |   |
| 0.942754225  |              |             |             |             |             |   |
| LOC100289092 | LOC100289092 |             | 60.9113083  | 64.99784026 |             |   |
| 31.24995136  |              | 30.16813519 |             |             |             |   |
| EXTL3        | EXTL3        | 1540.353277 | 968.8740564 | 1300.890832 |             |   |
| 1505.578497  |              |             |             |             |             |   |
| TUBB2B       | TUBB2B       | 19.91331233 | 14.21827756 | 29.46423985 |             |   |
| 15.0840676   |              |             |             |             |             |   |
| ARMC8        | ARMC8        | 3785.872085 | 4431.024641 | 4653.564185 |             |   |
| 4541.2471    |              |             |             |             |             |   |
| LRTOMT       | LRTOMT       | 2856.974634 | 3548.475842 | 1638.390307 |             |   |
| 1924.161373  |              |             |             |             |             |   |
| SMYD3        | SMYD3        | 590.371142  | 728.1789292 | 574.999105  |             |   |
| 653.3286777  |              |             |             |             |             |   |
| CDH15        | CDH15        | 1.171371313 | 3.046773762 | 3.571423012 |             |   |
| 1.885508449  |              |             |             |             |             |   |
| AGTPBP1      | AGTPBP1      | 2671.897966 | 1881.890594 | 1859.818534 |             |   |
| 2036.349125  |              |             |             |             |             |   |

|             |             |             |             |             |             |
|-------------|-------------|-------------|-------------|-------------|-------------|
| ATCAY       | ATCAY       | 1.171371313 | 0           | 0           | 0           |
| RBFOX1      | RBFOX1      | 0           | 0           | 1.785711506 | 0           |
| METTL4      | METTL4      | 1645.776695 | 1290.816484 |             | 1851.782832 |
| 1922.275864 |             |             |             |             |             |
| TSSC2       | TSSC2       | 1.171371313 | 0           | 0           | 4.713771124 |
| TMPRSS7     | TMPRSS7     | 1.171371313 | 0           | 2.678567259 | 0.942754225 |
| MTOR-AS1    | MTOR-AS1    |             | 121.8226166 |             | 27.42096386 |
| 31.24995136 | 49.96597391 |             |             |             |             |
| FAM86DP     | FAM86DP     | 199.1331233 | 290.4590987 |             | 470.5349818 |
| 285.6545301 |             |             |             |             |             |
| LMAN2L      | LMAN2L      | 886.7280843 | 1375.110558 |             | 1632.140317 |
| 1204.839899 |             |             |             |             |             |
| FAM154B     | FAM154B     | 8.199599194 | 10.15591254 |             | 8.92855753  |
| 8.484788022 |             |             |             |             |             |
| ESC02       | ESC02       | 3177.930373 | 2903.575395 |             | 1507.140511 |
| 1774.263451 |             |             |             |             |             |
| KY          | KY          | 1.171371313 | 0           | 0           | 0           |
| FGD4        | FGD4        | 9.370970508 | 5.07795627  |             | 35.71423012 |
| 16.96957604 |             |             |             |             |             |
| USP20       | USP20       | 5407.049983 | 3986.195672 |             | 4482.13588  |
| 3779.501687 |             |             |             |             |             |
| MLLT11      | MLLT11      | 385.3811621 | 444.8289693 |             | 308.9280905 |
| 170.6385147 |             |             |             |             |             |
| ERP29       | ERP29       | 6614.733807 | 7604.74731  |             | 7161.595995 |
| 7098.939312 |             |             |             |             |             |
| PSMF1       | PSMF1       | 7675.996217 | 8304.489684 |             | 7596.416747 |
| 7770.18032  |             |             |             |             |             |
| C4B_2       | C4B_2       | 0           | 0           | 1.885508449 |             |
| GNAZ        | GNAZ        | 2.342742627 | 0           | 15.1785478  | 15.0840676  |
| PGGT1B      | PGGT1B      | 1518.097222 | 472.2499331 |             | 383.0351181 |
| 1779.919976 |             |             |             |             |             |
| B3GALT4     | B3GALT4     | 36.31251072 | 0           | 0           | 29.22538097 |
| B3GALNT1    | B3GALNT1    |             | 120.6512453 |             | 1076.526729 |
| 118.7498152 | 85.79063445 |             |             |             |             |
| B4GALT2     | B4GALT2     | 581.0001715 | 470.2187506 |             | 201.7854002 |
| 267.7421998 |             |             |             |             |             |
| MRPL40      | MRPL40      | 2676.583451 | 3263.094699 |             | 2328.567804 |
| 2331.431198 |             |             |             |             |             |
| GNRH2       | GNRH2       | 1.171371313 | 0           | 6.249990271 | 2.828262674 |
| KCNH7       | KCNH7       | 0           | 0           | 0.892855753 | 2.828262674 |
| GPATCH1     | GPATCH1     | 844.558717  | 945.5154575 |             | 1049.998366 |
| 1023.831088 |             |             |             |             |             |
| NIPAL3      | NIPAL3      | 4509.779557 | 4573.207417 |             | 5897.312249 |
| 4863.669045 |             |             |             |             |             |
| PTPN18      | PTPN18      | 6535.080558 | 6877.583972 |             | 2975.888225 |
| 4203.741088 |             |             |             |             |             |
| LPAR4       | LPAR4       | 1.171371313 | 7.109138778 |             | 0           |
| MAFF        | MAFF        | 295.185571  | 337.1762963 |             | 668.748959  |
| 473.2626208 |             |             |             |             |             |
| PCDHGC4     | PCDHGC4     | 4.685485254 | 14.21827756 |             | 9.821413283 |

|             |             |             |             |             |             |
|-------------|-------------|-------------|-------------|-------------|-------------|
| 12.25580492 |             |             |             |             |             |
| CMTR1       | CMTR1       | 7015.342796 | 5405.992245 | 6274.097377 |             |
| 5237.942473 |             |             |             |             |             |
| TPT1        | TPT1        | 18518.20909 | 19278.96878 | 23600.85612 |             |
| 21333.58535 |             |             |             |             |             |
| TUBGCP3     | TUBGCP3     | 4786.223187 | 5591.845445 | 3397.31614  |             |
| 4058.556937 |             |             |             |             |             |
| TCP11L2     | TCP11L2     | 262.3871742 | 178.7440607 | 490.1778084 |             |
| 519.4575778 |             |             |             |             |             |
| LIMD2       | LIMD2       | 25219.62438 | 24885.0325  | 13016.05117 |             |
| 14960.56679 |             |             |             |             |             |
| THAP7       | THAP7       | 1327.163698 | 1814.861571 | 3247.316374 |             |
| 1968.470821 |             |             |             |             |             |
| HIRIP3      | HIRIP3      | 3392.291324 | 4261.420902 | 3274.102046 |             |
| 2928.194622 |             |             |             |             |             |
| ZNF605      | ZNF605      | 189.7621528 | 114.7618117 | 176.7854391 |             |
| 269.6277083 |             |             |             |             |             |
| AMT         | AMT         | 142.9073002 | 95.46557788 | 92.85699832 |             |
| 233.8030477 |             |             |             |             |             |
| PNMA5       | PNMA5       | 4.685485254 | 2.031182508 | 3.571423012 |             |
| 2.828262674 |             |             |             |             |             |
| PCYT2       | PCYT2       | 2701.182249 | 3202.159224 | 2539.281762 |             |
| 2389.88196  |             |             |             |             |             |
| DCHS2       | DCHS2       | 0           | 0           | 6.249990271 | 0           |
| ZNF260      | ZNF260      | 880.8712277 | 682.4773227 | 1257.1409   |             |
| 1264.233415 |             |             |             |             |             |
| EIF2AK2     | EIF2AK2     | 6017.334437 | 5337.947631 | 8433.915443 |             |
| 6997.121856 |             |             |             |             |             |
| RASA4CP     | RASA4CP     | 153.4496421 | 207.1806158 | 177.6782949 |             |
| 217.7762259 |             |             |             |             |             |
| GRAP2       | GRAP2       | 3825.69871  | 5084.049818 | 5140.17057  |             |
| 3870.006092 |             |             |             |             |             |
| NHS         | NHS         | 212.0182077 | 84.29407409 | 64.28561422 |             |
| 268.684954  |             |             |             |             |             |
| C19orf71    | C19orf71    |             | 43.3407386  | 4.062365016 |             |
| 18.74997081 | 31.11088942 |             |             |             |             |
| C12orf73    | C12orf73    |             | 486.1190951 | 426.5483267 |             |
| 330.3566286 | 362.0176223 |             |             |             |             |
| HMGB2       | HMGB2       | 52828.84624 | 66153.58311 | 26565.13722 |             |
| 31028.8698  |             |             |             |             |             |
| UXT         | UXT         | 3674.59181  | 3842.997305 | 3675.887135 |             |
| 3379.773896 |             |             |             |             |             |
| ZNF572      | ZNF572      | 0           | 0           | 251.7853224 | 95.2181767  |
| PACRG       | PACRG       | 0           | 3.046773762 | 0.892855753 | 3.771016899 |
| AFAP1L1     | AFAP1L1     | 15.22782708 | 6.093547524 | 5.357134518 | 0           |
| DPM2        | DPM2        | 2759.750815 | 3579.959171 | 2398.210553 |             |
| 2865.972843 |             |             |             |             |             |
| ADAM17      | ADAM17      | 1890.5933   | 1677.756752 | 1840.175707 |             |
| 1959.986033 |             |             |             |             |             |
| ESR2        | ESR2        | 28.11291152 | 13.2026863  | 42.85707615 |             |

|              |              |             |             |             |             |
|--------------|--------------|-------------|-------------|-------------|-------------|
| 18.85508449  |              |             |             |             |             |
| DLG2         | DLG2         | 7.028227881 | 4.062365016 | 17.85711506 |             |
| 5.656525348  |              |             |             |             |             |
| CD53         | CD53         | 27389.00405 | 29480.58292 | 16516.93858 |             |
| 19738.4452   |              |             |             |             |             |
| MRPS16       | MRPS16       | 7472.177609 | 7735.758582 | 5597.312716 |             |
| 5549.051367  |              |             |             |             |             |
| DNAJC13      | DNAJC13      | 3030.337588 | 1442.139581 | 1327.676505 |             |
| 2014.665778  |              |             |             |             |             |
| SLC9A8       | SLC9A8       | 1143.258402 | 1210.584775 | 1259.819468 |             |
| 1053.999223  |              |             |             |             |             |
| KIR3DL2      | KIR3DL2      | 155.7923847 | 0           | 73.21417175 | 180.0660569 |
| DNAJB2       | DNAJB2       | 347.8972801 | 66.01343151 | 231.24964   |             |
| 125.3863119  |              |             |             |             |             |
| HIVEP2       | HIVEP2       | 3146.303348 | 969.8896476 | 2932.138293 |             |
| 2773.582929  |              |             |             |             |             |
| CENPI        | CENPI        | 998.0083591 | 708.8826953 | 287.4995525 |             |
| 440.2662229  |              |             |             |             |             |
| NCAPD3       | NCAPD3       | 10900.78144 | 10497.1512  | 4774.992567 |             |
| 6698.268767  |              |             |             |             |             |
| PRRC2A       | PRRC2A       | 5.856856567 | 4.062365016 | 2.678567259 |             |
| 3.771016899  |              |             |             |             |             |
| TNP03        | TNP03        | 8780.599366 | 10268.64317 | 7841.059223 |             |
| 8723.304841  |              |             |             |             |             |
| CDRT4        | CDRT4        | 248.3307185 | 293.5058724 | 292.856687  |             |
| 223.4327513  |              |             |             |             |             |
| LYSMD2       | LYSMD2       | 1354.105238 | 1518.308925 | 4488.38587  |             |
| 3304.353558  |              |             |             |             |             |
| SEC14L1      | SEC14L1      | 5977.507813 | 5880.273361 | 2905.35262  |             |
| 2798.094539  |              |             |             |             |             |
| VSIG10L      | VSIG10L      | 48.02622385 | 35.54569389 | 41.96422039 |             |
| 64.10728728  |              |             |             |             |             |
| LOC100128164 | LOC100128164 |             | 1.171371313 | 5.07795627  | 0           |
| 0.942754225  |              |             |             |             |             |
| PLEKHA4      | PLEKHA4      | 51.54033779 | 90.38762161 | 257.1424569 |             |
| 159.325464   |              |             |             |             |             |
| ASAH2        | ASAH2        | 14.05645576 | 11.17150379 | 12.49998054 |             |
| 17.91233027  |              |             |             |             |             |
| FAM136A      | FAM136A      | 4686.656625 | 6009.25345  | 3133.030837 |             |
| 3717.279908  |              |             |             |             |             |
| DCAF4        | DCAF4        | 400.6089892 | 700.7579653 | 990.1770301 |             |
| 479.8619004  |              |             |             |             |             |
| MTHFD2       | MTHFD2       | 8295.651642 | 7631.152683 | 6704.45385  |             |
| 7811.661506  |              |             |             |             |             |
| FAM122A      | FAM122A      | 1252.195934 | 1667.600839 | 1409.819234 |             |
| 1378.306677  |              |             |             |             |             |
| MS4A12       | MS4A12       | 0           | 0           | 1.785711506 | 0           |
| VSIG2        | VSIG2        | 4.685485254 | 1.015591254 | 28.5713841  |             |
| 27.33987252  |              |             |             |             |             |
| RNF125       | RNF125       | 3042.051301 | 1879.859411 | 1826.782871 |             |

|             |         |             |             |             |
|-------------|---------|-------------|-------------|-------------|
| 1858.168577 |         |             |             |             |
| NAP1L4      | NAP1L4  | 27828.26829 | 27505.25793 | 17222.29462 |
| 19402.8247  |         |             |             |             |
| SPACA3      | SPACA3  | 0           | 0           | 1.885508449 |
| URI1        | URI1    | 2585.216489 | 1602.602999 | 2290.175007 |
| 2501.126958 |         |             |             |             |
| ZNF638      | ZNF638  | 5385.965299 | 4945.929407 | 5802.669539 |
| 6122.245935 |         |             |             |             |
| VCAM1       | VCAM1   | 0           | 5.07795627  | 17.85711506 |
| 47.13771124 |         |             |             |             |
| CTDSP1      | CTDSP1  | 1966.732435 | 1145.586935 | 523.2134713 |
| 525.1141032 |         |             |             |             |
| NPHP1       | NPHP1   | 14.05645576 | 12.18709505 | 54.46420093 |
| 32.05364364 |         |             |             |             |
| GABPB1      | GABPB1  | 4877.590149 | 4736.717609 | 3035.70956  |
| 3993.506896 |         |             |             |             |
| POLR3E      | POLR3E  | 2974.111765 | 3377.856511 | 2602.67452  |
| 2540.722636 |         |             |             |             |
| IDH3A       | IDH3A   | 7378.467903 | 10247.31575 | 6679.453888 |
| 6671.871648 |         |             |             |             |
| POLL        | POLL    | 748.5062693 | 895.7514861 | 762.4988131 |
| 793.7990572 |         |             |             |             |
| SLC03A1     | SLC03A1 | 2304.087374 | 3278.328568 | 1676.783104 |
| 1634.735826 |         |             |             |             |
| AHCYL1      | AHCYL1  | 5698.72144  | 5188.655717 | 4623.207089 |
| 4920.234299 |         |             |             |             |
| HOXD3       | HOXD3   | 1.171371313 | 1.015591254 | 0           |
| 0           |         |             |             | 0           |
| CPSF6       | CPSF6   | 10875.01127 | 11220.25217 | 7649.988092 |
| 8745.930943 |         |             |             |             |
| SCRIB       | SCRIB   | 1263.909647 | 373.7375815 | 318.7495038 |
| 383.7009695 |         |             |             |             |
| TMEM35      | TMEM35  | 1.171371313 | 0           | 0           |
| 0           |         |             |             | 0           |
| KLF6        | KLF6    | 8166.800797 | 10965.33877 | 23025.85701 |
| 20750.02049 |         |             |             |             |
| LRRC41      | LRRC41  | 5574.556081 | 7636.230639 | 6830.346511 |
| 5510.398443 |         |             |             |             |
| MB21D1      | MB21D1  | 3213.071513 | 2778.657671 | 1466.069146 |
| 1291.573288 |         |             |             |             |
| FLYWCH2     | FLYWCH2 | 785.9901513 | 1005.435342 | 774.9987936 |
| 808.8831248 |         |             |             |             |
| NIT1        | NIT1    | 2716.410076 | 2905.606578 | 2650.888731 |
| 2700.990854 |         |             |             |             |
| EHD4        | EHD4    | 3947.521326 | 3180.831808 | 2209.817989 |
| 2675.53649  |         |             |             |             |
| RELB        | RELB    | 5879.112622 | 5333.885266 | 8423.201174 |
| 6843.452917 |         |             |             |             |
| PLCH1       | PLCH1   | 44.51210991 | 20.31182508 | 0           |
| 59.39351616 |         |             |             |             |
| RAD54L2     | RAD54L2 | 4558.977152 | 3904.948372 | 3209.816432 |
| 3172.367966 |         |             |             |             |
| MDM1        | MDM1    | 2301.744631 | 1291.832075 | 1128.569672 |
| 1437.700193 |         |             |             |             |

|             |             |             |             |             |             |
|-------------|-------------|-------------|-------------|-------------|-------------|
| RTF1        | RTF1        | 2424.738619 | 2145.94432  | 1793.747208 |             |
| 1657.361927 |             |             |             |             |             |
| TP53I3      | TP53I3      | 304.5565415 | 501.7020795 | 283.0352737 |             |
| 162.1537267 |             |             |             |             |             |
| TDRD5       | TDRD5       | 0           | 0           | 3.771016899 |             |
| FYN         | FYN         | 15426.9602  | 14243.66734 | 20957.11024 |             |
| 25392.14229 |             |             |             |             |             |
| EVA1A       | EVA1A       | 11.71371313 | 11.17150379 | 10.71426904 |             |
| 1.885508449 |             |             |             |             |             |
| DUSP12      | DUSP12      | 1548.552876 | 1808.768023 | 1916.961302 |             |
| 1753.522858 |             |             |             |             |             |
| RAB10       | RAB10       | 12231.45926 | 13298.15188 | 11385.69656 |             |
| 13024.14961 |             |             |             |             |             |
| DCTN3       | DCTN3       | 3976.805609 | 5026.161116 | 2744.638585 |             |
| 2559.57772  |             |             |             |             |             |
| MAP1B       | MAP1B       | 28.11291152 | 34.53010264 | 7.142846024 |             |
| 23.56885562 |             |             |             |             |             |
| SH3BP5-AS1  | SH3BP5-AS1  |             | 5220.801944 | 4790.543945 |             |
| 1743.747286 | 2351.229036 |             |             |             |             |
| VSX1        | VSX1        | 3.51411394  | 1.015591254 | 0           | 0.942754225 |
| BIN2        | BIN2        | 13604.30643 | 16141.80739 | 7133.024611 |             |
| 7647.622271 |             |             |             |             |             |
| ZBP1        | ZBP1        | 510.7178927 | 752.5531193 | 1765.175824 |             |
| 965.3803261 |             |             |             |             |             |
| MINOS1      | MINOS1      | 5670.608528 | 5585.751897 | 4671.4213   |             |
| 4540.304346 |             |             |             |             |             |
| VWDE        | VWDE        | 11.71371313 | 61.9510665  | 106.2498346 |             |
| 27.33987252 |             |             |             |             |             |
| CMTM6       | CMTM6       | 16112.21242 | 22868.06827 | 14874.08399 |             |
| 15224.53797 |             |             |             |             |             |
| MANSC1      | MANSC1      | 17.5705697  | 15.23386881 | 37.49994163 |             |
| 49.96597391 |             |             |             |             |             |
| USP18       | USP18       | 3777.672486 | 4184.235967 | 4995.527938 |             |
| 3335.464447 |             |             |             |             |             |
| NRDE2       | NRDE2       | 739.1352988 | 673.3370014 | 699.1060546 |             |
| 666.5272369 |             |             |             |             |             |
| LINC00371   | LINC00371   |             | 0           | 24.99996108 | 0           |
| DCAF11      | DCAF11      | 8445.58717  | 9928.4201   | 9497.306645 |             |
| 8950.508609 |             |             |             |             |             |
| TK2         | TK2         | 604.4275977 | 499.670897  | 298.2138215 |             |
| 379.9299526 |             |             |             |             |             |
| TRMU        | TRMU        | 2027.643744 | 2180.474422 | 2114.282423 |             |
| 2179.647768 |             |             |             |             |             |
| TSC22D1     | TSC22D1     | 155.7923847 | 67.02902277 | 1293.747986 |             |
| 342.2197836 |             |             |             |             |             |
| PTBP3       | PTBP3       | 10425.20469 | 6583.062509 | 4888.385248 |             |
| 5740.430474 |             |             |             |             |             |
| ZC3H18      | ZC3H18      | 3710.904321 | 2648.661991 | 2119.639558 |             |
| 2398.366748 |             |             |             |             |             |
| GTSF1       | GTSF1       | 285.8146005 | 615.4483    | 616.0704696 |             |



|             |           |             |             |             |             |
|-------------|-----------|-------------|-------------|-------------|-------------|
| 404.4415624 |           |             |             |             |             |
| RHEBL1      | RHEBL1    | 693.4518176 | 730.2101117 | 459.8207128 |             |
| 376.1589357 |           |             |             |             |             |
| ZNF454      | ZNF454    | 0           | 0           | 10.71426904 | 0           |
| PRDX5       | PRDX5     | 5794.773888 | 9014.387971 | 6133.919023 |             |
| 5225.686668 |           |             |             |             |             |
| DTWD1       | DTWD1     | 544.6876608 | 475.2967069 | 884.8200513 |             |
| 667.4699911 |           |             |             |             |             |
| ZNF41       | ZNF41     | 784.81878   | 822.6289158 | 1107.141134 |             |
| 1122.820282 |           |             |             |             |             |
| ZNF733P     | ZNF733P   | 0           | 0           | 0           | 1.885508449 |
| PCDHGA8     | PCDHGA8   | 0           | 14.21827756 | 9.821413283 | 12.25580492 |
| PBXIP1      | PBXIP1    | 10497.82971 | 10470.74583 | 10204.4484  |             |
| 10957.63235 |           |             |             |             |             |
| STAT5A      | STAT5A    | 10069.10781 | 13393.61746 | 19616.04089 |             |
| 16496.31342 |           |             |             |             |             |
| ATG3        | ATG3      | 5202.060003 | 6258.073307 | 5502.670006 |             |
| 4890.066164 |           |             |             |             |             |
| GBP5        | GBP5      | 25882.62054 | 37938.42689 | 130323.9043 |             |
| 89969.86393 |           |             |             |             |             |
| TAOK2       | TAOK2     | 1809.768679 | 953.6401876 | 1174.998171 |             |
| 886.1889712 |           |             |             |             |             |
| LCOR        | LCOR      | 787.1615226 | 650.9939938 | 1123.212537 |             |
| 1106.79346  |           |             |             |             |             |
| ZNF493      | ZNF493    | 261.2158029 | 196.009112  | 834.8201291 |             |
| 457.235799  |           |             |             |             |             |
| TLE2        | TLE2      | 8.199599194 | 33.51451138 | 360.7137242 |             |
| 329.9639787 |           |             |             |             |             |
| GTF2A1L     | GTF2A1L   | 0           | 0           | 0           | 1.885508449 |
| KLHL5       | KLHL5     | 3409.861893 | 3131.067836 | 2476.781859 |             |
| 2277.694207 |           |             |             |             |             |
| DCTN4       | DCTN4     | 1536.839163 | 1473.62291  | 2033.03255  |             |
| 1899.649763 |           |             |             |             |             |
| SNORD18C    | SNORD18C  |             | 19.91331233 | 17.26505132 |             |
| 87.4998638  |           | 56.56525348 |             |             |             |
| TIE1        | TIE1      | 14.05645576 | 12.18709505 | 58.03562395 |             |
| 26.39711829 |           |             |             |             |             |
| CLDN15      | CLDN15    | 115.96576   | 45.70160643 | 224.9996498 |             |
| 139.5276253 |           |             |             |             |             |
| LINC00544   | LINC00544 |             | 38.65525334 | 28.43655511 | 0           |
| 2.828262674 |           |             |             |             |             |
| RICTOR      | RICTOR    | 2615.672143 | 928.2504062 | 2356.246332 |             |
| 3020.584536 |           |             |             |             |             |
| ACOT7       | ACOT7     | 7226.189633 | 9619.680358 | 3763.386999 |             |
| 3988.793125 |           |             |             |             |             |
| PPP5D1      | PPP5D1    | 26.94154021 | 39.60805891 | 38.39279738 |             |
| 16.02682182 |           |             |             |             |             |
| STXBP4      | STXBP4    | 424.0364155 | 386.9402678 | 220.535371  |             |
| 246.0588527 |           |             |             |             |             |
| IRF2BP2     | IRF2BP2   | 1644.605324 | 1904.233601 | 2611.603078 |             |

|             |             |             |             |             |   |
|-------------|-------------|-------------|-------------|-------------|---|
| 2186.247047 |             |             |             |             |   |
| NEDD9       | NEDD9       | 4308.303691 | 5130.767015 | 3656.244309 |   |
| 4417.746297 |             |             |             |             |   |
| RBPJL       | RBPJL       | 28.11291152 | 45.70160643 | 23.21424958 |   |
| 27.33987252 |             |             |             |             |   |
| CRELD1      | CRELD1      | 619.6554248 | 659.1187239 | 1312.497957 |   |
| 1022.888334 |             |             |             |             |   |
| CALN1       | CALN1       | 7.028227881 | 0           | 0           | 0 |
| DDA1        | DDA1        | 1996.016718 | 2217.035708 | 1675.890248 |   |
| 1608.338707 |             |             |             |             |   |
| HSDL1       | HSDL1       | 1499.355281 | 1290.816484 | 1215.17668  |   |
| 1313.256635 |             |             |             |             |   |
| GHRL        | GHRL        | 130.0222158 | 132.026863  | 58.9284797  |   |
| 58.45076193 |             |             |             |             |   |
| DYSF        | DYSF        | 8.199599194 | 1.015591254 | 16.96425931 | 0 |
| RGPD2       | RGPD2       | 21.08468364 | 8.124730032 | 20.53568232 |   |
| 68.8210584  |             |             |             |             |   |
| UBTF        | UBTF        | 8602.550926 | 7387.410782 | 7510.702594 |   |
| 6715.238343 |             |             |             |             |   |
| LACC1       | LACC1       | 450.9779557 | 686.5396877 | 624.1061714 |   |
| 846.5932938 |             |             |             |             |   |
| THAP9       | THAP9       | 203.8186085 | 164.5257832 | 262.4995914 |   |
| 229.0892766 |             |             |             |             |   |
| PRODH2      | PRODH2      | 0           | 0           | 0.892855753 | 0 |
| LRRC25      | LRRC25      | 4.685485254 | 0           | 0           | 0 |
| MRPL10      | MRPL10      | 3750.730946 | 4377.198305 | 3761.601288 |   |
| 2938.564918 |             |             |             |             |   |
| SETSIP      | SETSIP      | 0           | 0           | 0.892855753 | 0 |
| AQP9        | AQP9        | 0           | 2.031182508 | 33.03566286 | 0 |
| GAN         | GAN         | 448.6352131 | 540.2945472 | 445.5350208 |   |
| 395.0140202 |             |             |             |             |   |
| KCNC1       | KCNC1       | 0           | 0           | 24.10710533 | 0 |
| CLECL1      | CLECL1      | 320.9557399 | 116.7929942 | 52.67848943 |   |
| 184.779828  |             |             |             |             |   |
| TNFRSF11A   | TNFRSF11A   |             | 606.7703404 | 2714.675422 |   |
| 303.570956  | 193.2646161 |             |             |             |   |
| NUDT3       | NUDT3       | 2033.5006   | 1840.251352 | 1866.068524 |   |
| 1617.76625  |             |             |             |             |   |
| PNPLA6      | PNPLA6      | 2559.44632  | 1111.056832 | 1266.962314 |   |
| 933.3266825 |             |             |             |             |   |
| TRAFD1      | TRAFD1      | 11037.83189 | 10980.57264 | 21026.75298 |   |
| 16207.83063 |             |             |             |             |   |
| ARPP19      | ARPP19      | 12550.07225 | 9323.127712 | 7533.023988 |   |
| 9958.312876 |             |             |             |             |   |
| ZBTB6       | ZBTB6       | 482.6049811 | 313.8176975 | 899.9985991 |   |
| 802.2838452 |             |             |             |             |   |
| TOR1B       | TOR1B       | 1885.907815 | 281.3187774 | 347.3208879 |   |
| 1835.542476 |             |             |             |             |   |
| BRF1        | BRF1        | 1504.040766 | 1252.224016 | 908.9271566 |   |
| 1026.659351 |             |             |             |             |   |

|                 |             |             |               |
|-----------------|-------------|-------------|---------------|
| GAS6-AS1        | GAS6-AS1    | 18.74194102 | 20.31182508   |
| 15.1785478      | 24.51160984 |             |               |
| HMG3-AS1        | HMG3-AS1    | 634.8832519 | 879.502026    |
| 699.9989104     | 579.7938482 |             |               |
| KCTD12 KCTD12   | 29.28428284 | 15.23386881 | 27.67852834   |
| 54.67974503     |             |             |               |
| IL1RN IL1RN     | 38.65525334 | 175.697287  | 403.5708004   |
| 312.9944026     |             |             |               |
| RBM11 RBM11     | 15.22782708 | 14.21827756 | 210.7139577   |
| 129.1573288     |             |             |               |
| RGS13 RGS13     | 5.856856567 | 2.031182508 | 0 16.02682182 |
| PTPN6 PTPN6     | 12721.09246 | 18589.38231 | 16358.90311   |
| 15325.41268     |             |             |               |
| TBCCD1 TBCCD1   | 2328.686171 | 2777.64208  | 2496.424685   |
| 2276.751453     |             |             |               |
| MSANTD2 MSANTD2 | 325.6412251 | 311.786515  | 549.9991439   |
| 510.0300356     |             |             |               |
| PIK3IP1 PIK3IP1 | 5227.830172 | 5334.900858 | 28007.99212   |
| 17271.2574      |             |             |               |
| IL17F IL17F     | 139.3931863 | 0 0         | 134.8138541   |
| NIPSNAP3B       | NIPSNAP3B   | 16.39919839 | 15.23386881   |
| 68.74989298     | 39.59567744 |             |               |
| OPA1 OPA1       | 8590.837213 | 7829.192977 | 5247.313261   |
| 6132.616232     |             |             |               |
| NME8 NME8       | 0 0         | 5.357134518 | 0             |
| LPXN LPXN       | 16033.73054 | 21084.69003 | 12576.76614   |
| 15665.74695     |             |             |               |
| NDUFB9 NDUFB9   | 7135.994042 | 8390.814941 | 5372.313066   |
| 5180.434465     |             |             |               |
| CPQ CPQ         | 174.5343257 | 207.1806158 | 438.3921747   |
| 468.5488497     |             |             |               |
| INSIG2 INSIG2   | 2133.067162 | 2246.487854 | 1851.782832   |
| 2235.270267     |             |             |               |
| TRAF3 TRAF3     | 5209.088231 | 4962.178867 | 3276.780614   |
| 3949.197447     |             |             |               |
| LRR31 LRR31     | 1.171371313 | 9.140321286 | 0 0           |
| ZBTB9 ZBTB9     | 51.54033779 | 81.24730032 | 109.8212576   |
| 116.9015239     |             |             |               |
| PEX11G PEX11G   | 52.71170911 | 120.8553592 | 117.8569594   |
| 92.38991402     |             |             |               |
| EVC EVC         | 219.0464356 | 39.60805891 | 10.71426904   |
| 158.3827098     |             |             |               |
| ST7-OT3 ST7-OT3 | 322.1271112 | 560.6063722 | 349.1065994   |
| 260.200166      |             |             |               |
| TANK TANK       | 13155.67122 | 13847.58675 | 10278.55543   |
| 12010.68882     |             |             |               |
| MCU MCU         | 1717.230346 | 1831.111031 | 1317.855091   |
| 1278.374729     |             |             |               |
| EPHB6 EPHB6     | 718.0506152 | 379.831129  | 1323.212226   |
| 1292.516042     |             |             |               |

|              |              |             |             |             |             |
|--------------|--------------|-------------|-------------|-------------|-------------|
| ARRDC2       | ARRDC2       | 4177.110104 | 4459.461197 | 6241.061714 |             |
| 4532.762312  |              |             |             |             |             |
| HIST1H2BM    | HIST1H2BM    |             | 49.19759517 | 19.29623383 |             |
| 10.71426904  | 4.713771124  |             |             |             |             |
| YARS         | YARS         | 15332.07912 | 20248.85842 | 15083.90509 |             |
| 14941.71171  |              |             |             |             |             |
| ABCB4        | ABCB4        | 0           | 0           | 0.892855753 | 10.37029647 |
| MAP4         | MAP4         | 6202.411105 | 6124.015262 | 5658.919763 |             |
| 6902.846433  |              |             |             |             |             |
| ZNF692       | ZNF692       | 1103.431777 | 901.8450336 | 1011.605568 |             |
| 1104.907951  |              |             |             |             |             |
| APOBEC3D     | APOBEC3D     |             | 1887.079186 | 2506.479215 |             |
| 929.4628389  | 1017.231808  |             |             |             |             |
| C9orf41      | C9orf41      | 1653.976295 | 1376.126149 | 888.3914743 |             |
| 1169.957993  |              |             |             |             |             |
| C4orf33      | C4orf33      | 695.7945602 | 859.1902009 | 422.3207712 |             |
| 502.4880018  |              |             |             |             |             |
| TSHZ2        | TSHZ2        | 305.7279128 | 122.8865417 | 183.0354294 |             |
| 464.7778328  |              |             |             |             |             |
| PML          | PML          | 5473.818148 | 5393.80515  | 6284.811646 |             |
| 4814.645826  |              |             |             |             |             |
| HLA-C        | HLA-C        | 35359.01447 | 104431.2175 | 165261.3499 |             |
| 60768.99457  |              |             |             |             |             |
| UBXN10       | UBXN10       | 71.45365012 | 72.10697904 | 50.89277792 |             |
| 79.19135488  |              |             |             |             |             |
| L3MBTL4      | L3MBTL4      | 22.25605496 | 4.062365016 | 0           | 14.14131337 |
| MTIF2        | MTIF2        | 2060.44214  | 2581.632968 | 2010.711156 |             |
| 2127.796285  |              |             |             |             |             |
| PTPN20B      | PTPN20B      | 0           | 0           | 6.249990271 | 11.3130507  |
| ELF3         | ELF3         | 0           | 0           | 3.571423012 | 3.771016899 |
| KDM5B        | KDM5B        | 5582.75568  | 8583.777279 | 3437.494649 |             |
| 3930.342363  |              |             |             |             |             |
| CARS2        | CARS2        | 3452.031261 | 3993.304811 | 2208.032277 |             |
| 2803.751064  |              |             |             |             |             |
| PLEKHS1      | PLEKHS1      | 4.685485254 | 1.015591254 | 0           | 0           |
| NFXL1        | NFXL1        | 468.5485254 | 602.2456137 | 1183.033873 |             |
| 1095.480409  |              |             |             |             |             |
| MIR567       | MIR567       | 0           | 1.015591254 | 0           | 0           |
| BDNF-AS      | BDNF-AS      | 22.25605496 | 13.2026863  | 84.82129654 |             |
| 26.39711829  |              |             |             |             |             |
| LOC338963    | LOC338963    |             | 3.51411394  | 2.031182508 | 0           |
| 0            |              |             |             |             |             |
| DYX1C1-CCPG1 | DYX1C1-CCPG1 |             | 1939.790895 | 2037.276056 |             |
| 2621.424491  | 2694.391574  |             |             |             |             |
| UBE2E3       | UBE2E3       | 3119.361808 | 2261.721723 | 2171.425191 |             |
| 2249.41158   |              |             |             |             |             |
| HMGN4        | HMGN4        | 4327.045632 | 4877.884793 | 7272.310108 |             |
| 6928.300797  |              |             |             |             |             |
| ZBTB18       | ZBTB18       | 77.31050669 | 28.43655511 | 103.5712674 |             |
| 82.01961755  |              |             |             |             |             |

|             |          |             |             |             |
|-------------|----------|-------------|-------------|-------------|
| ZNHIT1      | ZNHIT1   | 3139.27512  | 3894.792459 | 1901.782754 |
| 2046.719422 |          |             |             |             |
| CXCL9       | CXCL9    | 5.856856567 | 18.28064257 | 384.8208296 |
| 89.56165135 |          |             |             |             |
| MIF         | MIF      | 22013.58109 | 26246.94037 | 18286.57868 |
| 19732.78868 |          |             |             |             |
| MGMT        | MGMT     | 1382.21815  | 1314.175083 | 932.1414062 |
| 1350.966804 |          |             |             |             |
| CIT         | CIT      | 2627.385856 | 1126.290701 | 299.999533  |
| 688.210584  |          |             |             |             |
| MAL         | MAL      | 7001.286341 | 6471.347471 | 5270.52751  |
| 5735.716703 |          |             |             |             |
| MAGOH       | MAGOH    | 2810.119781 | 2655.771129 | 2437.496206 |
| 2303.148571 |          |             |             |             |
| MAGEB2      | MAGEB2   | 0           | 2.031182508 | 0           |
| MAD2L1      | MAD2L1   | 8203.113308 | 8398.939671 | 4175.886357 |
| 5535.852808 |          |             |             |             |
| LCTL        | LCTL     | 755.5344972 | 785.0520394 | 360.7137242 |
| 569.4235517 |          |             |             |             |
| GRIN2C      | GRIN2C   | 3.51411394  | 10.15591254 | 0           |
| TBCEL       | TBCEL    | 819.9599194 | 711.9294691 | 1.885508449 |
| 655.2141862 |          |             |             | 300.8923888 |
| JDP2        | JDP2     | 26.94154021 | 26.40537261 | 29.46423985 |
| 31.11088942 |          |             |             |             |
| FOX04       | FOX04    | 303.3851702 | 114.7618117 | 183.0354294 |
| 173.4667773 |          |             |             |             |
| STOX1       | STOX1    | 195.6190093 | 118.8241767 | 169.6425931 |
| 197.9783872 |          |             |             |             |
| PCGF3       | PCGF3    | 1313.107242 | 891.6891211 | 1199.105276 |
| 934.2694367 |          |             |             |             |
| NCOR2       | NCOR2    | 1603.607328 | 1460.420223 | 1656.247422 |
| 1511.235022 |          |             |             |             |
| CCDC27      | CCDC27   | 1.171371313 | 1.015591254 | 0.892855753 |
| 15.0840676  |          |             |             |             |
| SAMD11      | SAMD11   | 1009.722072 | 1603.61859  | 1049.10551  |
| 953.1245212 |          |             |             |             |
| SELENBP1    | SELENBP1 | 1.171371313 | 1.015591254 | 0           |
| MSH2        | MSH2     | 6723.671339 | 6885.708702 | 0           |
| 6346.621441 |          |             |             | 4464.278765 |
| NUB1        | NUB1     | 2777.321384 | 2639.521669 | 7716.952273 |
| 6586.081014 |          |             |             |             |
| LIFR-AS1    | LIFR-AS1 | 0           | 0           | 0           |
| MIR6506     | MIR6506  | 92.53833376 | 52.81074521 | 2.828262674 |
| 66.93554995 |          |             |             | 80.35701777 |
| MIR6505     | MIR6505  | 0           | 1.015591254 | 0           |
| MY016       | MY016    | 14.05645576 | 28.43655511 | 0           |
| 58.45076193 |          |             |             | 3.571423012 |
| CPA5        | CPA5     | 9.370970508 | 15.23386881 | 21.42853807 |
| 6.599279573 |          |             |             |             |
| CSNK1D      | CSNK1D   | 7718.165584 | 7743.883312 | 8755.343514 |

|              |              |             |   |             |             |
|--------------|--------------|-------------|---|-------------|-------------|
| 7373.280791  |              |             |   |             |             |
| FAM84A       | FAM84A       | 0           | 0 | 0           | 9.427542247 |
| SFT2D1       | SFT2D1       | 3493.029257 |   | 5892.460456 | 2947.316841 |
| 2681.193015  |              |             |   |             |             |
| GPR152       | GPR152       | 16.39919839 |   | 15.23386881 | 14.28569205 |
| 9.427542247  |              |             |   |             |             |
| FAM214B      | FAM214B      | 1028.464013 |   | 1213.631549 | 574.999105  |
| 656.1569404  |              |             |   |             |             |
| TRIM4        | TRIM4        | 1925.734439 |   | 2071.806158 | 4037.493715 |
| 3187.452034  |              |             |   |             |             |
| SPPL2A       | SPPL2A       | 8999.645801 |   | 9452.107801 | 5152.670551 |
| 7152.676303  |              |             |   |             |             |
| NR1I2        | NR1I2        | 2.342742627 |   | 13.2026863  | 14.28569205 |
| 41.48118589  |              |             |   |             |             |
| TNFSF11      | TNFSF11      | 97.22381902 |   | 222.4144846 | 249.9996108 |
| 69.76381263  |              |             |   |             |             |
| SP100        | SP100        | 13446.17131 |   | 14830.67908 | 19201.75582 |
| 18215.89713  |              |             |   |             |             |
| METTL17      | METTL17      | 3740.188604 |   | 3676.44034  | 3931.243881 |
| 3475.934827  |              |             |   |             |             |
| PRAME        | PRAME        | 0           | 0 | 0           | 17.91233027 |
| CACNA1C      | CACNA1C      | 39.82662466 |   | 29.45214637 | 194.6425542 |
| 157.4399555  |              |             |   |             |             |
| PLGLB1       | PLGLB1       | 55.05445173 |   | 50.7795627  | 74.99988325 |
| 105.5884732  |              |             |   |             |             |
| CADM1        | CADM1        | 46.85485254 |   | 48.74838019 | 30.3570956  |
| 50.90872813  |              |             |   |             |             |
| FERMT2       | FERMT2       | 35.1411394  |   | 19.29623383 | 34.82137437 |
| 63.16453306  |              |             |   |             |             |
| LOC102723769 | LOC102723769 |             |   | 2.342742627 | 8.124730032 |
| 0.892855753  | 6.599279573  |             |   |             |             |
| SEC24C       | SEC24C       | 17441.71886 |   | 17362.54808 | 17223.18748 |
| 14892.68849  |              |             |   |             |             |
| CTSS         | CTSS         | 4118.541538 |   | 4511.25635  | 5288.384625 |
| 5096.529339  |              |             |   |             |             |
| PSTPIP1      | PSTPIP1      | 5060.324074 |   | 4137.518769 | 2458.924744 |
| 4948.516926  |              |             |   |             |             |
| SLC30A8      | SLC30A8      | 65.59679355 |   | 0           | 0           |
| KLF8         | KLF8         | 118.3085027 |   | 149.2919143 | 85.79063445 |
| 76.3630922   |              |             |   |             | 52.67848943 |
| SETD6        | SETD6        | 882.042599  |   | 726.1477466 | 1052.676933 |
| 855.0780818  |              |             |   |             |             |
| STEAP1B      | STEAP1B      | 2.342742627 |   | 7.109138778 | 0           |
| ASL          | ASL          | 2107.296993 |   | 2922.871629 | 10.37029647 |
| 1529.147352  |              |             |   |             | 1194.640998 |
| SRBD1        | SRBD1        | 1538.010535 |   | 1647.289014 | 1313.390813 |
| 1707.327901  |              |             |   |             |             |
| MIR374B      | MIR374B      | 4.685485254 |   | 5.07795627  | 6.249990271 |
| 1.885508449  |              |             |   |             |             |
| MIR199A2     | MIR199A2     |             |   | 0           | 0           |
|              |              |             |   | 0.892855753 | 0           |

|                 |               |               |               |
|-----------------|---------------|---------------|---------------|
| PAQR3 PAQR3     | 1389.246378   | 1195.350906   | 1108.03399    |
| 942.7542247     |               |               |               |
| CLDND1 CLDND1   | 26714.29417   | 31559.49822   | 14885.69111   |
| 20200.39477     |               |               |               |
| WBP1L WBP1L     | 2673.069337   | 2125.632495   | 1908.032744   |
| 1800.660569     |               |               |               |
| RCAN3 RCAN3     | 3567.997021   | 5044.441759   | 4792.849682   |
| 3480.648598     |               |               |               |
| ATF6B ATF6B     | 0 61.9510665  | 113.3926806   | 0             |
| GTF2IRD1        | GTF2IRD1      | 3.51411394    | 17.26505132   |
| 132.1426514     | 48.08046546   |               |               |
| SEMA6C SEMA6C   | 63.25405093   | 51.79515396   | 41.96422039   |
| 59.39351616     |               |               |               |
| ACE ACE         | 117.1371313   | 3.046773762   | 127.6783727   |
| 284.7117759     |               |               |               |
| RELA RELA       | 4638.630401   | 4227.906391   | 6086.597668   |
| 4825.016122     |               |               |               |
| PDE2A PDE2A     | 43.3407386    | 46.71719769   | 108.9284019   |
| 83.905126       |               |               |               |
| BLK BLK         | 31.62702546   | 9.140321286   | 0 65.99279573 |
| BHMT BHMT       | 0 4.062365016 | 18.74997081   | 0.942754225   |
| CEACAM1 CEACAM1 | 620.8267961   | 4045.099965   | 1449.997743   |
| 1013.460792     |               |               |               |
| C9orf117        | C9orf117      | 166.3347265   | 275.2252298   |
| 294.6423985     | 215.8907175   |               |               |
| LRRIQ4 LRRIQ4   | 1.171371313   | 0 0           | 6.599279573   |
| INPP4A INPP4A   | 7363.240076   | 7636.230639   | 5416.062998   |
| 5869.587803     |               |               |               |
| UTS2B UTS2B     | 3.51411394    | 0 0.892855753 | 0.942754225   |
| CHMP2A CHMP2A   | 8335.478267   | 10620.03774   | 5492.848593   |
| 6564.397667     |               |               |               |
| TEX14 TEX14     | 124.1653592   | 82.26289158   | 97.32127708   |
| 47.13771124     |               |               |               |
| SMIM22 SMIM22   | 3.51411394    | 0 0           | 0             |
| ANKRD46 ANKRD46 | 517.7461205   | 477.3278894   | 1156.2482     |
| 811.7113875     |               |               |               |
| COL11A1 COL11A1 | 0 0           | 0.892855753   | 0             |
| CDC42 CDC42     | 15218.4561    | 12308.966     | 7286.5958     |
| 8136.911714     |               |               |               |
| DMD DMD         | 275.2722587   | 356.4725302   | 274.1067162   |
| 306.395123      |               |               |               |
| UCHL3 UCHL3     | 2062.784883   | 3049.820536   | 1505.3548     |
| 1809.145357     |               |               |               |
| BTN2A2 BTN2A2   | 1122.173718   | 940.4375013   | 919.6414256   |
| 1070.968799     |               |               |               |
| VSNL1 VSNL1     | 1.171371313   | 0 0           | 0             |
| SNORD86 SNORD86 | 431.0646434   | 456.0004731   | 681.2489396   |
| 570.366306      |               |               |               |
| SNORD82 SNORD82 | 0 2.031182508 | 13.3928363    | 9.427542247   |
| TRAF3IP1        | TRAF3IP1      | 450.9779557   | 431.626283    |

|                 |               |               |             |  |
|-----------------|---------------|---------------|-------------|--|
| 599.1062103     | 513.8010525   |               |             |  |
| PTGES2 PTGES2   | 3135.761006   | 4470.6327     | 2921.424024 |  |
| 3196.879576     |               |               |             |  |
| FBX038 FBX038   | 4199.366159   | 3659.175288   | 3889.27966  |  |
| 3814.383593     |               |               |             |  |
| LAP3 LAP3       | 11922.21723   | 17113.72822   | 11202.66113 |  |
| 9156.971785     |               |               |             |  |
| RBAK RBAK       | 1215.883423   | 713.9606516   | 1648.21172  |  |
| 1584.769852     |               |               |             |  |
| RFPL2 RFPL2     | 5.856856567   | 0 0           | 0           |  |
| BATF BATF       | 6394.516      | 9378.985231   | 4889.278104 |  |
| 7035.774779     |               |               |             |  |
| UBD UBD         | 0 48.74838019 | 58.03562395   | 2.828262674 |  |
| TBR1 TBR1       | 0 0           | 0 7.542033798 |             |  |
| GUCA1B GUCA1B   | 9.370970508   | 6.093547524   | 4.464278765 |  |
| 49.96597391     |               |               |             |  |
| HAL HAL         | 10.54234182   | 1.015591254   | 1.785711506 |  |
| 3.771016899     |               |               |             |  |
| DAP3 DAP3       | 6085.273973   | 7591.544624   | 5438.384392 |  |
| 5652.754331     |               |               |             |  |
| SPAG6 SPAG6     | 92.53833376   | 68.04461402   | 7.142846024 |  |
| 34.88190631     |               |               |             |  |
| TNFRSF18        | TNFRSF18      | 4161.882277   | 5540.050291 |  |
| 3622.31579      | 6951.869653   |               |             |  |
| USP2 USP2       | 1.171371313   | 7.109138778   | 15.1785478  |  |
| 1.885508449     |               |               |             |  |
| RORC RORC       | 1413.845175   | 329.0515663   | 334.8209074 |  |
| 1806.317095     |               |               |             |  |
| AQR AQR         | 5532.386713   | 4900.227801   | 4373.207478 |  |
| 4631.751506     |               |               |             |  |
| PROK2 PROK2     | 153.4496421   | 79.21611782   | 25.89281684 |  |
| 38.65292321     |               |               |             |  |
| APH1A APH1A     | 3872.553562   | 3512.930148   | 3094.63804  |  |
| 3040.382375     |               |               |             |  |
| GGTA1P GGTA1P   | 0 0           | 0.892855753   | 0.942754225 |  |
| MPPE1 MPPE1     | 1973.760663   | 1762.050826   | 2185.710883 |  |
| 1914.73383      |               |               |             |  |
| TAS2R10 TAS2R10 | 2.342742627   | 0 0           | 0           |  |
| ECHDC2 ECHDC2   | 819.9599194   | 793.1767694   | 602.6776333 |  |
| 692.9243552     |               |               |             |  |
| SERBP1 SERBP1   | 16182.4947    | 17532.15182   | 13721.40721 |  |
| 15403.66128     |               |               |             |  |
| MAPKBP1 MAPKBP1 | 1231.11125    | 833.8004196   | 717.8560254 |  |
| 951.2390127     |               |               |             |  |
| DNAJC7 DNAJC7   | 4286.047636   | 3427.620482   | 3657.137164 |  |
| 3583.408808     |               |               |             |  |
| TSTA3 TSTA3     | 4117.370167   | 7917.549417   | 3434.816082 |  |
| 3450.480462     |               |               |             |  |
| THAP4 THAP4     | 2271.288977   | 2863.967336   | 2203.567998 |  |
| 1912.848322     |               |               |             |  |



|             |           |             |               |               |
|-------------|-----------|-------------|---------------|---------------|
| HDDC2       | HDDC2     | 2591.073345 | 3300.671576   | 3513.387388   |
| 3019.641782 |           |             |               |               |
| VAV1        | VAV1      | 3346.607843 | 2484.136207   | 1694.640219   |
| 2469.073315 |           |             |               |               |
| TRPV3       | TRPV3     | 5.856856567 | 9.140321286   | 0 43.36669434 |
| CSF1        | CSF1      | 3990.862065 | 5030.223481   | 7241.953013   |
| 12260.51869 |           |             |               |               |
| SPRY1       | SPRY1     | 364.2964785 | 423.5015529   | 340.1780419   |
| 370.5024103 |           |             |               |               |
| CBX3P2      | CBX3P2    | 32.79839678 | 22.34300759   | 55.35705669   |
| 37.71016899 |           |             |               |               |
| LRR37A11P   | LRR37A11P | 0           | 2.031182508   | 35.71423012   |
| 0           |           |             |               |               |
| KLF7        | KLF7      | 684.0808471 | 857.1590184   | 746.4274095   |
| 618.4467714 |           |             |               |               |
| FCHSD2      | FCHSD2    | 1904.649756 | 1316.206265   | 2289.282151   |
| 2090.086116 |           |             |               |               |
| ATP10B      | ATP10B    | 3.51411394  | 2.031182508   | 0.892855753   |
| 1.885508449 |           |             |               |               |
| RBPJ        | RBPJ      | 6550.308385 | 7849.504803   | 9754.449102   |
| 10537.16397 |           |             |               |               |
| RSU1        | RSU1      | 6997.772227 | 9769.987864   | 7388.381356   |
| 7188.500963 |           |             |               |               |
| RLF         | RLF       | 1937.448152 | 1706.193307   | 3097.316607   |
| 2492.64217  |           |             |               |               |
| ABI2        | ABI2      | 1628.206126 | 1323.315404   | 1535.711895   |
| 2026.921583 |           |             |               |               |
| H2AFV       | H2AFV     | 15660.06309 | 15463.39243   | 9791.056188   |
| 9251.247207 |           |             |               |               |
| FBX011      | FBX011    | 1916.363469 | 949.5778225   | 1433.033484   |
| 1441.47121  |           |             |               |               |
| KIAA1033    | KIAA1033  | 6680.346744 | 6475.340621   | 6186.98192    |
| 6225.9489   |           |             |               |               |
| VAT1L       | VAT1L     | 2.342742627 | 0 0 0         |               |
| RFPL1       | RFPL1     | 3.51411394  | 0 27.67852834 | 4.713771124   |
| HNRNPM      | HNRNPM    | 31778.13236 | 41403.62425   | 23916.0342    |
| 26934.4882  |           |             |               |               |
| ANP32A      | ANP32A    | 5293.426966 | 3675.424748   | 2085.711039   |
| 2716.074921 |           |             |               |               |
| SAFB        | SAFB      | 9211.664009 | 11761.56231   | 12889.26565   |
| 11596.81972 |           |             |               |               |
| GFRA3       | GFRA3     | 3.51411394  | 2.031182508   | 0 0           |
| UBN1        | UBN1      | 2856.974634 | 2796.938314   | 3042.852406   |
| 2657.624159 |           |             |               |               |
| HP          | HP        | 0 0         | 1.785711506   | 2.828262674   |
| YTHDF2      | YTHDF2    | 11956.187   | 15161.76183   | 14444.62037   |
| 12604.62398 |           |             |               |               |
| CDC20       | CDC20     | 12961.22358 | 19188.58115   | 5235.706136   |
| 7006.549398 |           |             |               |               |
| EIF3C       | EIF3C     | 1240.482221 | 2113.4454     | 1486.604829   |

|                 |              |             |             |             |   |
|-----------------|--------------|-------------|-------------|-------------|---|
| 1597.025657     |              |             |             |             |   |
| AP3S2 AP3S2     | 2500.877754  | 3135.130201 | 2175.88947  |             |   |
| 2029.749846     |              |             |             |             |   |
| STX6 STX6       | 2562.960434  | 3105.678055 | 2598.210241 |             |   |
| 2590.68861      |              |             |             |             |   |
| MTX3 MTX3       | 1423.216146  | 643.8848551 | 765.1773803 |             |   |
| 1088.88113      |              |             |             |             |   |
| RRM1 RRM1       | 26810.34662  | 31555.43585 | 12618.73036 |             |   |
| 14859.69209     |              |             |             |             |   |
| TGIF2 TGIF2     | 3783.529342  | 3859.246765 | 5099.992061 |             |   |
| 4627.037735     |              |             |             |             |   |
| KLHL10 KLHL10   | 4.685485254  | 0           | 16.07140355 | 8.484788022 |   |
| C17orf77        | C17orf77     | 0           | 1.015591254 | 0           | 0 |
| SVIL-AS1        | SVIL-AS1     | 659.4820495 | 831.7692371 |             |   |
| 582.141951      | 675.0120249  |             |             |             |   |
| IN080C IN080C   | 666.5102774  | 882.5487998 | 643.7489979 |             |   |
| 642.015627      |              |             |             |             |   |
| MIR155HG        | MIR155HG     | 811.7603202 | 623.57303   |             |   |
| 1623.211759     | 2109.883955  |             |             |             |   |
| SNORD38B        | SNORD38B     | 2.342742627 | 5.07795627  |             |   |
| 12.49998054     | 8.484788022  |             |             |             |   |
| MAP3K7 MAP3K7   | 5382.451185  | 6781.102803 | 3666.065722 |             |   |
| 5183.262727     |              |             |             |             |   |
| DPY19L4 DPY19L4 | 524.7743484  | 310.7709237 | 570.5348262 |             |   |
| 844.7077853     |              |             |             |             |   |
| KDM6A KDM6A     | 2328.686171  | 3172.707078 | 5458.027218 |             |   |
| 3072.436018     |              |             |             |             |   |
| ASF1B ASF1B     | 10887.89636  | 14010.08135 | 5000.885073 |             |   |
| 5798.881236     |              |             |             |             |   |
| TJP3 TJP3       | 156.963756   | 268.1160911 | 1246.426631 |             |   |
| 814.5396502     |              |             |             |             |   |
| RAB18 RAB18     | 5537.072199  | 6635.873254 | 6980.346277 |             |   |
| 5765.884838     |              |             |             |             |   |
| MAPK14 MAPK14   | 7508.490119  | 8092.231112 | 5461.598641 |             |   |
| 5976.11903      |              |             |             |             |   |
| ILDR1 ILDR1     | 83.16736326  | 104.6058992 | 35.71423012 |             |   |
| 18.85508449     |              |             |             |             |   |
| PGAP2 PGAP2     | 1579.008531  | 1969.231442 | 1199.998132 |             |   |
| 1194.469603     |              |             |             |             |   |
| HDAC7 HDAC7     | 7220.332776  | 4110.097805 | 2168.746624 |             |   |
| 3131.829535     |              |             |             |             |   |
| LOC100506207    | LOC100506207 | 12.88508445 | 46.71719769 |             |   |
| 58.9284797      | 16.02682182  |             |             |             |   |
| PPP1R26-AS1     | PPP1R26-AS1  | 7.028227881 | 9.140321286 | 0           |   |
| 23.56885562     |              |             |             |             |   |
| LOC100506136    | LOC100506136 | 17.5705697  | 24.3741901  |             |   |
| 55.35705669     | 22.62610139  |             |             |             |   |
| LOC100506497    | LOC100506497 | 2.342742627 | 0           | 0           | 0 |
| DNM30S DNM30S   | 0            | 1.015591254 | 8.92855753  | 11.3130507  |   |
| MAGI2-AS3       | MAGI2-AS3    | 0           | 2.031182508 | 52.67848943 |   |

| 1.885508449 |             |             |             |             |             |
|-------------|-------------|-------------|-------------|-------------|-------------|
| LINC00936   | LINC00936   |             | 135.8790724 |             | 113.7462205 |
| 211.6068135 | 171.5812689 |             |             |             |             |
| SLC26A4-AS1 | SLC26A4-AS1 |             | 24.59879758 |             | 79.21611782 |
| 63.39275847 | 9.427542247 |             |             |             |             |
| INS         | INS         | 0           | 2.031182508 | 0           | 0           |
| IGF2BP2     | IGF2BP2     | 0           | 0           | 7.542033798 |             |
| AFF3        | AFF3        | 65.59679355 | 40.62365016 |             | 71.42846024 |
| 301.6813519 |             |             |             |             |             |
| ZNF816      | ZNF816      | 682.9094757 | 887.626756  |             | 1805.354333 |
| 1886.451204 |             |             |             |             |             |
| TTLL9       | TTLL9       | 1.171371313 | 0           | 0           | 0           |
| ATXN7L1     | ATXN7L1     | 602.0848551 | 368.6596252 |             | 415.1779252 |
| 345.9908005 |             |             |             |             |             |
| GPC2        | GPC2        | 33.96976809 | 14.21827756 |             | 67.85703723 |
| 72.5920753  |             |             |             |             |             |
| C15orf57    | C15orf57    |             | 1854.280789 |             | 2580.617377 |
| 2178.568037 | 2051.433193 |             |             |             |             |
| BEND6       | BEND6       | 7.028227881 | 2.031182508 |             | 0.892855753 |
| 0.942754225 |             |             |             |             |             |
| METTL6      | METTL6      | 946.4680213 | 1121.212744 |             | 806.248745  |
| 775.8867269 |             |             |             |             |             |
| GLUL        | GLUL        | 5843.971483 | 7237.103276 |             | 4108.02932  |
| 4699.62981  |             |             |             |             |             |
| REP15       | REP15       | 0           | 1.015591254 | 3.571423012 | 0           |
| SOWAHB      | SOWAHB      | 0           | 0           | 16.07140355 | 0           |
| PRR25       | PRR25       | 7.028227881 | 4.062365016 |             | 2.678567259 |
| LIPM        | LIPM        | 0           | 0           | 3.771016899 | 0           |
| FOXP4       | FOXP4       | 201.4758659 | 112.7306292 |             | 176.7854391 |
| 241.3450815 |             |             |             |             |             |
| PDE9A       | PDE9A       | 77.31050669 | 138.1204106 |             | 196.4282657 |
| 180.0660569 |             |             |             |             |             |
| ENAH        | ENAH        | 12.88508445 | 6.093547524 |             | 2.678567259 |
| 12.25580492 |             |             |             |             |             |
| GPSM3       | GPSM3       | 0           | 1.015591254 | 0           | 0           |
| ANGPT4      | ANGPT4      | 1.171371313 | 5.07795627  |             | 0.892855753 |
| 14.14131337 |             |             |             |             |             |
| ATRAID      | ATRAID      | 5810.001715 | 7397.566695 |             | 7164.274562 |
| 6460.694702 |             |             |             |             |             |
| BRCA1       | BRCA1       | 5197.374518 | 3575.896806 |             | 1816.068602 |
| 2583.146576 |             |             |             |             |             |
| UBE2D4      | UBE2D4      | 655.9679355 | 764.7402143 |             | 860.7129459 |
| 911.6433353 |             |             |             |             |             |
| GCNT2       | GCNT2       | 111.2802748 | 143.1983668 |             | 188.3925639 |
| 131.0428372 |             |             |             |             |             |
| XPNPEP1     | XPNPEP1     | 4466.438818 | 4948.976181 |             | 3311.601988 |
| 4094.381598 |             |             |             |             |             |
| RBM4B       | RBM4B       | 1497.012539 | 1931.654565 |             | 1426.783493 |
| 1309.485618 |             |             |             |             |             |
| GBP4        | GBP4        | 11420.87031 | 14410.2243  |             | 42644.57648 |

|              |              |             |             |             |             |
|--------------|--------------|-------------|-------------|-------------|-------------|
| 30180.391    |              |             |             |             |             |
| RASD2        | RASD2        | 5.856856567 | 0           | 8.035701777 | 31.11088942 |
| QPRT         | QPRT         | 370.1533351 | 547.4036859 | 214.2853807 |             |
| 184.779828   |              |             |             |             |             |
| ETHE1        | ETHE1        | 2450.508788 | 2539.993726 | 1929.461282 |             |
| 2306.919588  |              |             |             |             |             |
| TRAM1        | TRAM1        | 12352.1105  | 12695.90627 | 17814.25798 |             |
| 16908.29702  |              |             |             |             |             |
| CBX6         | CBX6         | 2372.02691  | 1191.288541 | 1166.962469 |             |
| 1322.684177  |              |             |             |             |             |
| APTR         | APTR         | 975.7523041 | 1109.025649 | 1170.533892 |             |
| 1037.972401  |              |             |             |             |             |
| SPTY2D1-AS1  | SPTY2D1-AS1  |             | 973.4095615 | 813.4885945 |             |
| 480.3563951  | 554.3394841  |             |             |             |             |
| ZSWIM8-AS1   | ZSWIM8-AS1   |             | 865.6434006 | 443.813378  |             |
| 468.7492703  | 473.2626208  |             |             |             |             |
| LOC100506314 | LOC100506314 |             | 50.36896648 | 25.38978135 |             |
| 22.32139383  | 64.10728728  |             |             |             |             |
| FAM153C      | FAM153C      | 0           | 0           | 10.71426904 | 11.3130507  |
| ABCC5-AS1    | ABCC5-AS1    |             | 1.171371313 | 0           | 2.678567259 |
| 0            |              |             |             |             |             |
| LOC100507156 | LOC100507156 |             | 5.856856567 | 4.062365016 |             |
| 9.821413283  | 22.62610139  |             |             |             |             |
| LOC100507634 | LOC100507634 |             | 35.1411394  | 15.23386881 |             |
| 33.92851862  | 23.56885562  |             |             |             |             |
| ITGB2-AS1    | ITGB2-AS1    |             | 344.3831662 | 164.5257832 |             |
| 70.53560449  | 182.8943196  |             |             |             |             |
| LINC00649    | LINC00649    |             | 1021.435785 | 851.0654709 |             |
| 1257.1409    | 1045.514435  |             |             |             |             |
| WNT8B        | WNT8B        | 7.028227881 | 6.093547524 | 3.571423012 | 0           |
| CYP1B1       | CYP1B1       | 17243.75711 | 13610.95399 | 3016.959589 |             |
| 4512.964474  |              |             |             |             |             |
| COL7A1       | COL7A1       | 10.54234182 | 0           | 11.60712479 | 18.85508449 |
| PMS2         | PMS2         | 1584.865387 | 1238.005739 | 984.8198956 |             |
| 1476.353116  |              |             |             |             |             |
| HNF1A        | HNF1A        | 16.39919839 | 19.29623383 | 25.89281684 |             |
| 17.91233027  |              |             |             |             |             |
| CEP112       | CEP112       | 162.8206126 | 96.48116913 | 106.2498346 |             |
| 247.9443611  |              |             |             |             |             |
| CDK5RAP2     | CDK5RAP2     |             | 2751.551215 | 1814.861571 |             |
| 1786.604362  | 1951.501245  |             |             |             |             |
| PDSS1        | PDSS1        | 1341.220154 | 1556.901392 | 1050.891221 |             |
| 1028.544859  |              |             |             |             |             |
| HABP4        | HABP4        | 1315.449985 | 1233.943374 | 3131.245126 |             |
| 2504.897975  |              |             |             |             |             |
| ITGB1        | ITGB1        | 7629.141365 | 4524.459037 | 7200.881648 |             |
| 9907.404148  |              |             |             |             |             |
| TYMP         | TYMP         | 8426.845229 | 9426.71802  | 9935.69882  |             |
| 14334.57799  |              |             |             |             |             |
| NECAB3       | NECAB3       | 696.9659315 | 830.7536458 | 320.5352153 |             |

|             |             |             |             |             |             |
|-------------|-------------|-------------|-------------|-------------|-------------|
| 334.6777498 |             |             |             |             |             |
| C12orf57    | C12orf57    |             | 2360.313197 | 2823.343686 |             |
| 2970.53109  | 2350.286282 |             |             |             |             |
| CASC4       | CASC4       | 4663.229199 | 3508.867783 | 3241.066384 |             |
| 3751.21906  |             |             |             |             |             |
| ZNF273      | ZNF273      | 685.2522184 | 366.6284427 | 499.9992217 |             |
| 776.8294812 |             |             |             |             |             |
| TBC1D3F     | TBC1D3F     | 69.11090749 | 30.46773762 | 64.28561422 |             |
| 82.01961755 |             |             |             |             |             |
| THNSL1      | THNSL1      | 424.0364155 | 419.4391879 | 1231.248083 |             |
| 936.1549451 |             |             |             |             |             |
| WDR11       | WDR11       | 4485.180759 | 4123.300491 | 3246.423518 |             |
| 3645.630587 |             |             |             |             |             |
| PLBD1       | PLBD1       | 12.88508445 | 5.07795627  | 83.03558503 |             |
| 4.713771124 |             |             |             |             |             |
| ARFGAP1     | ARFGAP1     | 2302.916002 | 1737.676636 | 1731.247305 |             |
| 1744.095316 |             |             |             |             |             |
| ZNF423      | ZNF423      | 0           | 0           | 1.885508449 |             |
| GTF3C6      | GTF3C6      | 7567.058685 | 9694.834111 | 4448.207362 |             |
| 5276.595396 |             |             |             |             |             |
| KCNK7       | KCNK7       | 12.88508445 | 35.54569389 | 1.785711506 | 0           |
| TRIM47      | TRIM47      | 1144.429773 | 1263.39552  | 733.0345732 |             |
| 684.4395671 |             |             |             |             |             |
| FCHSD1      | FCHSD1      | 1830.853363 | 1202.460045 | 1620.533192 |             |
| 1830.828704 |             |             |             |             |             |
| IN080B      | IN080B      | 483.7763525 | 296.5526462 | 418.7493482 |             |
| 321.4791906 |             |             |             |             |             |
| PCSK9       | PCSK9       | 0           | 9.821413283 | 0           |             |
| FASTK       | FASTK       | 3679.277296 | 4221.812843 | 3655.351453 |             |
| 3327.922413 |             |             |             |             |             |
| OGN         | OGN         | 86.6814772  | 17.26505132 | 16.07140355 |             |
| 25.45436407 |             |             |             |             |             |
| SFMBT1      | SFMBT1      | 2465.736615 | 2792.875949 | 3276.780614 |             |
| 2626.51327  |             |             |             |             |             |
| S100B       | S100B       | 0           | 2.031182508 | 27.67852834 | 2.828262674 |
| RRAS        | RRAS        | 586.857028  | 529.1230434 | 1274.998015 |             |
| 1064.36952  |             |             |             |             |             |
| RANBP2      | RANBP2      | 6241.066358 | 2867.01411  | 4090.172205 |             |
| 4709.057352 |             |             |             |             |             |
| ITFG2       | ITFG2       | 1280.308846 | 1347.689594 | 2326.782092 |             |
| 2122.13976  |             |             |             |             |             |
| KCNN4       | KCNN4       | 4030.68869  | 5739.106177 | 3352.673353 |             |
| 4532.762312 |             |             |             |             |             |
| ARHGEF10    | ARHGEF10    |             | 135.8790724 | 48.74838019 |             |
| 41.96422039 | 119.7297865 |             |             |             |             |
| HMG20A      | HMG20A      | 2741.008873 | 3448.947899 | 3264.280633 |             |
| 3277.956439 |             |             |             |             |             |
| VAV3        | VAV3        | 202.6472372 | 170.6193307 | 362.4994357 |             |
| 563.7670264 |             |             |             |             |             |
| BRK1        | BRK1        | 7264.844886 | 9415.546516 | 5881.240845 |             |

|              |              |             |             |             |             |   |
|--------------|--------------|-------------|-------------|-------------|-------------|---|
| 5895.042167  |              |             |             |             |             |   |
| THBS1        | THBS1        | 401.7803605 | 270.1472736 | 35.71423012 |             |   |
| 117.8442781  |              |             |             |             |             |   |
| SCP2         | SCP2         | 5708.09241  | 5872.148631 | 4136.600704 |             |   |
| 5139.896033  |              |             |             |             |             |   |
| GNB2L1       | GNB2L1       | 26697.89498 | 33230.14583 | 26198.17351 |             |   |
| 26345.26681  |              |             |             |             |             |   |
| RWDD1        | RWDD1        | 2222.091382 | 2154.06905  | 2560.7103   |             |   |
| 2222.071708  |              |             |             |             |             |   |
| RRP15        | RRP15        | 694.6231889 | 762.7090318 | 708.9274679 |             |   |
| 768.3446931  |              |             |             |             |             |   |
| GET4         | GET4         | 4131.426623 | 6074.25129  | 5028.563601 |             |   |
| 3758.761094  |              |             |             |             |             |   |
| CCDC144A     | CCDC144A     |             | 36.31251072 | 8.124730032 |             |   |
| 24.99996108  | 73.53482953  |             |             |             |             |   |
| FAT4         | FAT4         | 0           | 0           | 2.678567259 | 0           |   |
| MUL1         | MUL1         | 2678.926194 | 3595.193039 | 3516.065955 |             |   |
| 2779.239454  |              |             |             |             |             |   |
| NEIL3        | NEIL3        | 2630.89997  | 3273.250612 | 591.0705085 |             |   |
| 1195.412357  |              |             |             |             |             |   |
| TMEM30A      | TMEM30A      | 9069.92808  | 10114.2733  | 10433.91233 |             |   |
| 9157.914539  |              |             |             |             |             |   |
| CCDC25       | CCDC25       | 2893.287144 | 3105.678055 | 2371.42488  |             |   |
| 2922.538097  |              |             |             |             |             |   |
| CLIC4        | CLIC4        | 1347.07701  | 1087.698233 | 1344.640764 |             |   |
| 1352.852312  |              |             |             |             |             |   |
| SPCS1        | SPCS1        | 6995.429484 | 7029.922661 | 6879.453577 |             |   |
| 7001.835627  |              |             |             |             |             |   |
| TNFRSF19     | TNFRSF19     |             | 436.9214999 | 135.0736368 | 0           |   |
| 58.45076193  |              |             |             |             |             |   |
| ZNF732       | ZNF732       | 3.51411394  | 2.031182508 | 0.892855753 |             |   |
| 0.942754225  |              |             |             |             |             |   |
| ANAPC5       | ANAPC5       | 16279.71851 | 22691.35539 | 13384.80059 |             |   |
| 14168.65324  |              |             |             |             |             |   |
| LRRFIP1      | LRRFIP1      | 15435.1598  | 17114.74381 | 10157.12705 |             |   |
| 12449.06954  |              |             |             |             |             |   |
| PPP2R5C      | PPP2R5C      | 14512.1192  | 12822.85517 | 12469.62345 |             |   |
| 13296.60559  |              |             |             |             |             |   |
| SH2B1        | SH2B1        | 238.9597479 | 59.91988399 | 105.3569789 |             |   |
| 109.3594901  |              |             |             |             |             |   |
| UBA7         | UBA7         | 5484.36049  | 4577.269782 | 4747.314039 |             |   |
| 5666.895645  |              |             |             |             |             |   |
| ZNF233       | ZNF233       | 35.1411394  | 29.45214637 | 41.96422039 |             |   |
| 46.19495701  |              |             |             |             |             |   |
| ST7          | ST7          | 1065.947895 | 1701.115351 | 874.1057822 |             |   |
| 795.6845657  |              |             |             |             |             |   |
| FLT1         | FLT1         | 801.2179784 | 249.8354485 | 190.1782754 |             |   |
| 646.7293982  |              |             |             |             |             |   |
| LOC100294145 | LOC100294145 |             | 0           | 0           | 0.892855753 | 0 |
| SLC4A11      | SLC4A11      | 87.85284851 | 106.6370817 | 77.67845051 |             |   |

|             |            |             |             |             |
|-------------|------------|-------------|-------------|-------------|
| 35.82466054 |            |             |             |             |
| SPTB        | SPTB       | 22.25605496 | 5.07795627  | 16.96425931 |
| 25.45436407 |            |             |             |             |
| CSGALNACT2  | CSGALNACT2 |             | 4841.277639 | 3980.102125 |
| 2569.638857 |            | 3650.344358 |             |             |
| BID         | BID        | 1259.224162 | 2681.160911 | 1746.425853 |
| 1498.979217 |            |             |             |             |
| CLEC18C     | CLEC18C    | 0           | 1.015591254 | 0.892855753 |
| 6.599279573 |            |             |             |             |
| IN080E      | IN080E     | 482.6049811 | 279.2875949 | 208.9282462 |
| 185.7225823 |            |             |             |             |
| PPP1R21     | PPP1R21    | 2072.155854 | 1532.527202 | 1576.78326  |
| 1549.887945 |            |             |             |             |
| TSPAN33     | TSPAN33    | 220.2178069 | 185.8531995 | 363.3922915 |
| 243.23059   |            |             |             |             |
| PDF         | PDF        | 1282.651588 | 1817.908345 | 1283.033717 |
| 1470.696591 |            |             |             |             |
| RAB38       | RAB38      | 534.1453189 | 783.0208569 | 217.8568037 |
| 255.4863949 |            |             |             |             |
| TOMM6       | TOMM6      | 5123.578125 | 6068.157743 | 5878.562278 |
| 5232.285947 |            |             |             |             |
| HS2ST1      | HS2ST1     | 1224.083023 | 1005.435342 | 1004.462722 |
| 1133.190578 |            |             |             |             |
| SP3         | SP3        | 7680.681702 | 6300.72814  | 7918.737674 |
| 7584.457738 |            |             |             |             |
| PCBP3       | PCBP3      | 488.4618377 | 123.902133  | 65.17846997 |
| 209.2914379 |            |             |             |             |
| DMTN        | DMTN       | 193.2762667 | 169.6037394 | 208.0353905 |
| 254.5436407 |            |             |             |             |
| PPIAL4D     | PPIAL4D    | 0           | 0           | 0.942754225 |
| ATP13A2     | ATP13A2    | 4813.164727 | 6291.587819 | 4935.706603 |
| 4809.932054 |            |             |             |             |
| KRTAP16-1   | KRTAP16-1  |             | 5.856856567 | 0           |
| 16.96425931 |            |             |             |             |
| 11.3130507  |            |             |             |             |
| ZNF414      | ZNF414     | 673.5385052 | 536.2321821 | 368.749426  |
| 411.9835962 |            |             |             |             |
| CPB2        | CPB2       | 5.856856567 | 7.109138778 | 25.89281684 |
| 0.942754225 |            |             |             |             |
| CARHSP1     | CARHSP1    | 5445.705236 | 4953.038546 | 1791.068641 |
| 1608.338707 |            |             |             |             |
| RASSF7      | RASSF7     | 1864.823131 | 2626.318983 | 2854.459842 |
| 2585.974838 |            |             |             |             |
| TMEM201     | TMEM201    | 1118.659604 | 794.1923607 | 589.284797  |
| 482.6901631 |            |             |             |             |
| LOC401052   | LOC401052  |             | 25.7701689  | 13.2026863  |
| 4.464278765 |            | 5.656525348 |             |             |
| PSMD12      | PSMD12     | 6052.475577 | 6827.820001 | 5592.848437 |
| 5729.117424 |            |             |             |             |
| PDE5A       | PDE5A      | 199.1331233 | 147.2607318 | 366.0708587 |
| 304.5096146 |            |             |             |             |
| PSMD5       | PSMD5      | 4789.737301 | 5207.951951 | 3951.779563 |

|             |           |             |             |             |
|-------------|-----------|-------------|-------------|-------------|
| 4440.372398 |           |             |             |             |
| RFC1        | RFC1      | 3958.063668 | 3537.304338 | 3510.708821 |
| 4256.535325 |           |             |             |             |
| LOC113230   | LOC113230 |             | 48.02622385 | 50.7795627  |
| 57.14276819 |           | 49.96597391 |             |             |
| ZNF718      | ZNF718    | 438.0928712 | 631.69776   | 815.1773025 |
| 604.305458  |           |             |             |             |
| PIGS        | PIGS      | 4780.36633  | 5876.210996 | 3609.81581  |
| 3919.972066 |           |             |             |             |
| GIT1        | GIT1      | 5715.120638 | 8242.538618 | 6583.025467 |
| 6899.075416 |           |             |             |             |
| MBTD1       | MBTD1     | 483.7763525 | 264.0537261 | 575.8919607 |
| 453.4647821 |           |             |             |             |
| MACROD1     | MACROD1   | 93.70970508 | 134.0580455 | 223.2139383 |
| 269.6277083 |           |             |             |             |
| TMEM39B     | TMEM39B   | 387.7239048 | 253.8978135 | 130.3569399 |
| 125.3863119 |           |             |             |             |
| P2RX7       | P2RX7     | 508.37515   | 438.7354217 | 1551.783299 |
| 1053.056469 |           |             |             |             |
| PSRC1       | PSRC1     | 488.4618377 | 507.795627  | 113.3926806 |
| 362.9603765 |           |             |             |             |
| ATRIP       | ATRIP     | 1377.532665 | 1580.259991 | 1670.533114 |
| 1943.959211 |           |             |             |             |
| RPUSD1      | RPUSD1    | 2873.373832 | 3904.948372 | 2325.889237 |
| 2070.288277 |           |             |             |             |
| FAM207A     | FAM207A   | 619.6554248 | 551.4660509 | 305.3566675 |
| 300.7385977 |           |             |             |             |
| ELOVL1      | ELOVL1    | 5164.576121 | 5540.050291 | 3676.779991 |
| 3817.211856 |           |             |             |             |
| WARS2       | WARS2     | 924.2119663 | 936.3751362 | 540.1777306 |
| 939.925962  |           |             |             |             |
| SUN3        | SUN3      | 4.685485254 | 3.046773762 | 0.892855753 |
| 4.713771124 |           |             |             |             |
| SAT2        | SAT2      | 536.4880616 | 599.1988399 | 1155.355344 |
| 741.0048206 |           |             |             |             |
| SLC26A10    | SLC26A10  |             | 3.51411394  | 7.109138778 |
| 14.28569205 |           | 7.542033798 |             |             |
| SLC4A5      | SLC4A5    | 562.2582305 | 473.2655244 | 491.0706642 |
| 479.8619004 |           |             |             |             |
| UBE2W       | UBE2W     | 1464.214142 | 1204.491227 | 1368.747869 |
| 1435.814684 |           |             |             |             |
| GAK         | GAK       | 8985.589346 | 9056.027212 | 6499.989882 |
| 6612.478132 |           |             |             |             |
| RGS20       | RGS20     | 10.54234182 | 1.015591254 | 19.64282657 |
| 12.25580492 |           |             |             |             |
| CMA1        | CMA1      | 4.685485254 | 9.140321286 | 7.142846024 |
| 1.885508449 |           |             |             |             |
| PPP1CB      | PPP1CB    | 15701.06109 | 10705.34741 | 10860.69738 |
| 11561.93781 |           |             |             |             |
| ITGAM       | ITGAM     | 891.4135695 | 2587.726515 | 387.4993968 |



|             |           |             |             |             |             |
|-------------|-----------|-------------|-------------|-------------|-------------|
| 170.6385147 |           |             |             |             |             |
| CRHR2       | CRHR2     | 2.342742627 | 1.015591254 | 0           | 2.828262674 |
| ZNF586      | ZNF586    | 897.2704261 | 706.8515128 | 1066.069769 |             |
| 1015.3463   |           |             |             |             |             |
| ATG2A       | ATG2A     | 640.7401085 | 306.7085587 | 401.7850889 |             |
| 344.105292  |           |             |             |             |             |
| LOXL2       | LOXL2     | 35.1411394  | 58.90429273 | 79.46416202 |             |
| 112.1877527 |           |             |             |             |             |
| GOLGA2      | GOLGA2    | 432.2360147 | 449.9069255 | 908.9271566 |             |
| 687.2678298 |           |             |             |             |             |
| MBIP        | MBIP      | 1056.576925 | 1112.072423 | 941.9628194 |             |
| 1230.294263 |           |             |             |             |             |
| SNAI3-AS1   | SNAI3-AS1 |             | 99.56656164 | 99.5279429  |             |
| 179.4640064 |           | 85.79063445 |             |             |             |
| ODC1        | ODC1      | 13160.35671 | 13267.68414 | 13871.40698 |             |
| 12495.26449 |           |             |             |             |             |
| IL32        | IL32      | 100817.5862 | 96755.37877 | 26004.42381 |             |
| 49532.30697 |           |             |             |             |             |
| CD28        | CD28      | 23128.72658 | 16650.61861 | 9105.342969 |             |
| 15616.72373 |           |             |             |             |             |
| ETNPPL      | ETNPPL    | 0           | 5.07795627  | 0           | 1.885508449 |
| RPRD1A      | RPRD1A    | 958.1817344 | 816.5353683 | 913.3914353 |             |
| 1053.999223 |           |             |             |             |             |
| INTS10      | INTS10    | 5429.306038 | 6085.422794 | 4863.385287 |             |
| 5166.293151 |           |             |             |             |             |
| YBX2        | YBX2      | 3.51411394  | 1.015591254 | 0.892855753 |             |
| 0.942754225 |           |             |             |             |             |
| FBXL4       | FBXL4     | 875.0143712 | 883.564391  | 1010.712712 |             |
| 1384.905956 |           |             |             |             |             |
| CBR1        | CBR1      | 3303.267104 | 5946.286792 | 5788.383847 |             |
| 3618.290714 |           |             |             |             |             |
| RRAD        | RRAD      | 51.54033779 | 126.9489068 | 101.7855558 |             |
| 147.0696591 |           |             |             |             |             |
| GNL1        | GNL1      | 0           | 3.046773762 | 0           | 0           |
| DPF2        | DPF2      | 7061.026278 | 8896.579385 | 8359.808416 |             |
| 7340.284394 |           |             |             |             |             |
| MVP         | MVP       | 25533.55189 | 31916.98634 | 19024.07753 |             |
| 21708.80153 |           |             |             |             |             |
| GOLGA5      | GOLGA5    | 2735.152017 | 2867.01411  | 3291.959161 |             |
| 3300.582541 |           |             |             |             |             |
| MY03B       | MY03B     | 14.05645576 | 1.015591254 | 0           | 1.885508449 |
| LIMS3       | LIMS3     | 0           | 2.031182508 | 0.892855753 | 1.885508449 |
| GLT8D1      | GLT8D1    | 2201.006698 | 2405.935681 | 3074.995213 |             |
| 2905.568521 |           |             |             |             |             |
| RPS20       | RPS20     | 7323.413452 | 6993.361375 | 9823.198995 |             |
| 7805.062226 |           |             |             |             |             |
| POT1        | POT1      | 1996.016718 | 1923.529835 | 2269.639324 |             |
| 2156.078912 |           |             |             |             |             |
| MMP24       | MMP24     | 237.7883766 | 104.6058992 | 158.928324  |             |
| 197.035633  |           |             |             |             |             |

|                 |              |             |             |
|-----------------|--------------|-------------|-------------|
| LOC102724050    | LOC102724050 | 48.02622385 | 68.04461402 |
| 174.9997276     | 150.840676   |             |             |
| ETFDH ETFDH     | 2879.230688  | 3486.524775 | 1907.139888 |
| 2542.608144     |              |             |             |
| CD300C CD300C   | 7.028227881  | 60.93547524 | 31.24995136 |
| 15.0840676      |              |             |             |
| RAB24 RAB24     | 1375.189922  | 1623.930415 | 1079.462605 |
| 1054.941977     |              |             |             |
| LAMA5-AS1       | LAMA5-AS1    | 0           | 0           |
| RBMS3-AS3       | RBMS3-AS3    | 0           | 3.046773762 |
| 1.885508449     |              |             | 0           |
| CLEC17A CLEC17A | 1.171371313  | 0           | 4.464278765 |
| RPL18A RPL18A   | 15013.46612  | 17121.85295 | 18201.75738 |
| 16746.14329     |              |             | 15.0840676  |
| NIPSNAP1        | NIPSNAP1     | 2736.323388 | 2984.822696 |
| 2787.495661     | 3112.97445   |             |             |
| UBE2G2 UBE2G2   | 6038.419121  | 7713.415575 | 6767.846608 |
| 7116.851642     |              |             |             |
| ARF5 ARF5       | 6629.961634  | 7791.616101 | 5283.920346 |
| 5372.756327     |              |             |             |
| SAE1 SAE1       | 16825.57755  | 23914.12726 | 10011.59156 |
| 11317.76447     |              |             |             |
| GGA3 GGA3       | 3455.545375  | 2451.637287 | 3176.780769 |
| 2899.911995     |              |             |             |
| MYL5 MYL5       | 65.59679355  | 101.5591254 | 99.10698859 |
| 113.130507      |              |             |             |
| PLA2G7 PLA2G7   | 0            | 0           | 31.24995136 |
| RABGAP1 RABGAP1 | 3024.480731  | 2334.844293 | 2952.673975 |
| 2750.956828     |              |             |             |
| NUSAP1 NUSAP1   | 14062.31262  | 14586.93718 | 6213.383185 |
| 8049.235571     |              |             |             |
| LIMA1 LIMA1     | 2745.694359  | 3058.960857 | 1865.175668 |
| 2783.010471     |              |             |             |
| SLC04A1 SLC04A1 | 4175.938732  | 7786.538145 | 2338.389217 |
| 2428.534883     |              |             |             |
| TMPRSS5 TMPRSS5 | 12.88508445  | 2.031182508 | 7.142846024 |
| 6.599279573     |              |             |             |
| SMC4 SMC4       | 11342.38843  | 8863.064874 | 3896.422506 |
| 6658.673089     |              |             |             |
| OLFM1 OLFM1     | 5.856856567  | 10.15591254 | 0           |
| ACVR1C ACVR1C   | 25.7701689   | 26.40537261 | 135.7140745 |
| 113.130507      |              |             |             |
| CXorf40A        | CXorf40A     | 1115.14549  | 1923.529835 |
| 1243.748064     | 1002.147741  |             |             |
| UPF2 UPF2       | 1762.913827  | 1702.130942 | 2347.317775 |
| 2136.281073     |              |             |             |
| MIR3155A        | MIR3155A     | 0           | 3.046773762 |
| 0.942754225     |              |             | 5.357134518 |
| MIR3074 MIR3074 | 0            | 2.031182508 | 0           |
| TPO TPO         | 24.59879758  | 29.45214637 | 23.21424958 |

|              |              |             |             |             |
|--------------|--------------|-------------|-------------|-------------|
| 4.713771124  |              |             |             |             |
| AZI2         | AZI2         | 2369.684167 | 2364.296439 | 2692.852951 |
| 2601.058906  |              |             |             |             |
| HS1BP3       | HS1BP3       | 871.5002572 | 813.4885945 | 999.9984434 |
| 751.3751171  |              |             |             |             |
| MIR3158-2    | MIR3158-2    | 0           | 0           | 0.892855753 |
| 3.771016899  |              |             |             |             |
| MIR3158-1    | MIR3158-1    | 0           | 0           | 0.892855753 |
| 3.771016899  |              |             |             |             |
| RFESD        | RFESD        | 187.4194102 | 245.7730835 | 325.8923499 |
| 269.6277083  |              |             |             |             |
| SNURF        | SNURF        | 4444.182763 | 5499.426641 | 12710.6945  |
| 8478.188743  |              |             |             |             |
| UTP3         | UTP3         | 791.8470079 | 456.0004731 | 836.6058406 |
| 762.6881678  |              |             |             |             |
| ADAMTS17     | ADAMTS17     |             | 33.96976809 | 9.140321286 |
| 18.74997081  | 25.45436407  |             |             |             |
| USHBP1       | USHBP1       | 15.22782708 | 35.54569389 | 0           |
| TSNARE1      | TSNARE1      | 180.3911823 | 286.3967336 | 631.2490174 |
| 390.300249   |              |             |             |             |
| NSD1         | NSD1         | 5296.941079 | 3725.18872  | 2917.852601 |
| 3877.548126  |              |             |             |             |
| TPK1         | TPK1         | 1222.911651 | 1699.084168 | 810.7130238 |
| 983.2926564  |              |             |             |             |
| ORC5         | ORC5         | 2103.782879 | 2139.850772 | 1969.639791 |
| 2371.969629  |              |             |             |             |
| TMEM117      | TMEM117      | 76.13913537 | 63.98224901 | 195.5354099 |
| 164.9819893  |              |             |             |             |
| MIR600HG     | MIR600HG     |             | 28.11291152 | 24.3741901  |
| 12.49998054  | 67.87830418  |             |             |             |
| GRM1         | GRM1         | 1.171371313 | 1.015591254 | 3.571423012 |
| 0.942754225  |              |             |             |             |
| POLM         | POLM         | 880.8712277 | 713.9606516 | 2027.675415 |
| 1417.902354  |              |             |             |             |
| NUTM1        | NUTM1        | 1.171371313 | 0           | 0           |
| ANLN         | ANLN         | 4433.640421 | 4188.298332 | 1269.640881 |
| 2366.313104  |              |             |             |             |
| SUSD3        | SUSD3        | 2825.347608 | 3598.239813 | 2661.603    |
| 2377.626155  |              |             |             |             |
| ST6GALNAC6   | ST6GALNAC6   |             | 5052.124475 | 5208.967542 |
| 4003.565197  | 4490.338372  |             |             |             |
| RABGEF1      | RABGEF1      | 2405.996678 | 2699.441553 | 3220.530701 |
| 2629.341533  |              |             |             |             |
| CBLL1        | CBLL1        | 5132.949096 | 4067.442972 | 4491.064438 |
| 5605.61662   |              |             |             |             |
| SNORA45A     | SNORA45A     |             | 17.5705697  | 21.32741634 |
| 46.42849916  | 39.59567744  |             |             |             |
| TTC25        | TTC25        | 11.71371313 | 22.34300759 | 16.96425931 |
| 9.427542247  |              |             |             |             |
| LOC101928269 | LOC101928269 | 0           | 0           | 11.60712479 |

|                 |             |             |             |   |
|-----------------|-------------|-------------|-------------|---|
| 0.942754225     |             |             |             |   |
| MRVI1-AS1       | MRVI1-AS1   | 1.171371313 | 0           | 0 |
| 0.942754225     |             |             |             |   |
| CBR3-AS1        | CBR3-AS1    | 677.0526192 | 1066.370817 |   |
| 668.748959      | 627.8743137 |             |             |   |
| SNHG1 SNHG1     | 700.4800454 | 562.6375547 | 1307.140822 |   |
| 1021.002825     |             |             |             |   |
| LINC00963       | LINC00963   | 986.2946459 | 1056.214904 |   |
| 1324.997938     | 1526.31909  |             |             |   |
| RTN4R RTN4R     | 91.36696245 | 138.1204106 | 117.8569594 |   |
| 101.8174563     |             |             |             |   |
| PAPOLG PAPOLG   | 2564.131805 | 2097.19594  | 3484.816004 |   |
| 2943.27869      |             |             |             |   |
| MRPS36 MRPS36   | 2790.206469 | 2262.737314 | 1790.175785 |   |
| 1893.050483     |             |             |             |   |
| DCLRE1C DCLRE1C | 2846.432292 | 2771.548532 | 2413.3891   |   |
| 2914.996063     |             |             |             |   |
| AJUBA AJUBA     | 72.62502143 | 22.34300759 | 91.07128681 |   |
| 31.11088942     |             |             |             |   |
| THYN1 THYN1     | 4026.003204 | 4606.721928 | 3884.815381 |   |
| 4066.098971     |             |             |             |   |
| NDUF4F4 NDUF4F4 | 1280.308846 | 1365.970237 | 1789.282929 |   |
| 1812.916374     |             |             |             |   |
| UBE2R2 UBE2R2   | 2770.293156 | 2143.913137 | 1782.140083 |   |
| 2057.089718     |             |             |             |   |
| H00K1 H00K1     | 166.3347265 | 161.4790094 | 896.427176  |   |
| 798.5128283     |             |             |             |   |
| CCDC183-AS1     | CCDC183-AS1 | 105.4234182 | 37.5768764  |   |
| 209.821102      | 132.9283457 |             |             |   |
| DCTN5 DCTN5     | 6543.280157 | 6840.007096 | 4358.028931 |   |
| 5367.099801     |             |             |             |   |
| LRSAM1 LRSAM1   | 1379.875407 | 1270.504659 | 1317.855091 |   |
| 1338.710999     |             |             |             |   |
| ARL2-SNX15      | ARL2-SNX15  | 2516.105581 | 2377.499126 |   |
| 2273.210747     | 2218.300691 |             |             |   |
| PLAUR PLAUR     | 245.9879758 | 509.8268095 | 475.8921164 |   |
| 365.7886392     |             |             |             |   |
| TMX2-CTNND1     | TMX2-CTNND1 | 1296.708044 | 1712.286854 |   |
| 2019.639713     | 1446.184981 |             |             |   |
| CCNH CCNH       | 3107.648095 | 3500.743053 | 2783.031382 |   |
| 2750.956828     |             |             |             |   |
| DDX3X DDX3X     | 37331.60376 | 39230.25896 | 45441.00069 |   |
| 32870.0688      |             |             |             |   |
| NDST3 NDST3     | 0 0         | 0.892855753 | 5.656525348 |   |
| 0AZ1 0AZ1       | 34065.82054 | 42115.55371 | 31703.52208 |   |
| 28253.40136     |             |             |             |   |
| NGDN NGDN       | 2634.414084 | 3269.188247 | 4981.242246 |   |
| 4043.47287      |             |             |             |   |
| CCND2 CCND2     | 55678.79264 | 85144.12397 | 27209.77907 |   |
| 25173.42331     |             |             |             |   |

|             |         |             |             |             |
|-------------|---------|-------------|-------------|-------------|
| B4GALT6     | B4GALT6 | 45.68348122 | 16.24946006 | 16.96425931 |
| 36.76741476 |         |             |             |             |
| ARL6IP4     | ARL6IP4 | 6685.016086 | 8703.617047 | 5458.027218 |
| 5626.357213 |         |             |             |             |
| CASC3       | CASC3   | 8080.11932  | 6394.162536 | 8573.200941 |
| 8280.210356 |         |             |             |             |
| RYR3        | RYR3    | 37.48388203 | 27.42096386 | 43.7499319  |
| 39.59567744 |         |             |             |             |
| RFC3        | RFC3    | 4355.158543 | 4090.801571 | 2151.782365 |
| 3192.165805 |         |             |             |             |
| NSF         | NSF     | 4298.93272  | 4685.938046 | 3327.673392 |
| 3634.317536 |         |             |             |             |
| CDH17       | CDH17   | 0           | 1.785711506 | 4.713771124 |
| ATP5A1      | ATP5A1  | 44323.51913 | 59997.06892 | 31349.05834 |
| 33719.49036 |         |             |             |             |
| SAMD4A      | SAMD4A  | 3.51411394  | 14.21827756 | 36.60708587 |
| 29.22538097 |         |             |             |             |
| TEX10       | TEX10   | 2626.214485 | 2644.599626 | 2426.781937 |
| 2819.777886 |         |             |             |             |
| POC1A       | POC1A   | 2599.272945 | 3405.277475 | 1160.712479 |
| 1355.680575 |         |             |             |             |
| SGSM1       | SGSM1   | 7.028227881 | 20.31182508 | 28.5713841  |
| 69.76381263 |         |             |             |             |
| NAT10       | NAT10   | 8186.71411  | 9669.44433  | 7935.701933 |
| 8311.321245 |         |             |             |             |
| STAU2       | STAU2   | 2459.879758 | 2618.194253 | 1301.783688 |
| 1847.79828  |         |             |             |             |
| AGPAT9      | AGPAT9  | 1083.518465 | 2447.574922 | 777.6773609 |
| 1313.256635 |         |             |             |             |
| ARFGAP2     | ARFGAP2 | 7393.695731 | 9528.277145 | 8150.880169 |
| 7599.541805 |         |             |             |             |
| P2RX5       | P2RX5   | 3887.781389 | 5592.861036 | 1008.927001 |
| 1578.170572 |         |             |             |             |
| ARNT        | ARNT    | 4364.529514 | 4551.880001 | 3173.209346 |
| 3283.612965 |         |             |             |             |
| TSPAN15     | TSPAN15 | 101.9093043 | 300.6150112 | 130.3569399 |
| 196.0928787 |         |             |             |             |
| CTDSP2      | CTDSP2  | 5587.441165 | 2683.192093 | 4610.707109 |
| 4100.038123 |         |             |             |             |
| TFEB        | TFEB    | 755.5344972 | 861.2213834 | 1051.784077 |
| 691.0388467 |         |             |             |             |
| AXIN1       | AXIN1   | 501.3469222 | 285.3811424 | 541.9634421 |
| 429.8959265 |         |             |             |             |
| RBBP7       | RBBP7   | 16690.86985 | 20234.64015 | 13154.44381 |
| 13996.12922 |         |             |             |             |
| VIPR2       | VIPR2   | 69.11090749 | 111.7150379 | 0           |
| P2RY4       | P2RY4   | 0           | 1.785711506 | 51.85148236 |
| P2RY1       | P2RY1   | 42.16936728 | 12.18709505 | 1.885508449 |
| LILRA2      | LILRA2  | 1.171371313 | 0           | 0           |
| NFU1        | NFU1    | 1494.669796 | 2101.258305 | 0           |
|             |         |             |             | 15.0840676  |
|             |         |             |             | 2016.961146 |

|             |          |             |             |             |             |
|-------------|----------|-------------|-------------|-------------|-------------|
| 1929.817898 |          |             |             |             |             |
| TMEM138     | TMEM138  | 2206.863555 | 2841.624329 | 2590.17454  |             |
| 2447.389967 |          |             |             |             |             |
| NUP62       | NUP62    | 10200.3014  | 13526.65991 | 9347.306878 |             |
| 10374.06749 |          |             |             |             |             |
| GOLM1       | GOLM1    | 291.6714571 | 279.2875949 | 222.3210825 |             |
| 136.6993626 |          |             |             |             |             |
| KCTD8       | KCTD8    | 0           | 0           | 1.885508449 |             |
| PKN2-AS1    | PKN2-AS1 |             | 10.54234182 | 14.21827756 |             |
| 7.142846024 |          | 16.02682182 |             |             |             |
| RPGR        | RPGR     | 413.4940737 | 438.7354217 | 582.141951  |             |
| 660.8707115 |          |             |             |             |             |
| CUTA        | CUTA     | 1.171371313 | 1.015591254 | 0.892855753 |             |
| 3.771016899 |          |             |             |             |             |
| XAB2        | XAB2     | 1041.349098 | 411.3144579 | 741.9631308 |             |
| 663.6989742 |          |             |             |             |             |
| SORCS2      | SORCS2   | 1.171371313 | 0           | 30.3570956  | 0           |
| IL24        | IL24     | 268.2440308 | 196.009112  | 521.4277598 |             |
| 412.9263504 |          |             |             |             |             |
| PRDX3       | PRDX3    | 26435.5078  | 32107.9175  | 14769.61987 |             |
| 17943.44116 |          |             |             |             |             |
| AP3M2       | AP3M2    | 2338.057142 | 2871.076475 | 2680.352971 |             |
| 2657.624159 |          |             |             |             |             |
| TGOLN2      | TGOLN2   | 11522.77961 | 9910.139457 | 12316.94511 |             |
| 13467.2441  |          |             |             |             |             |
| KIF2C       | KIF2C    | 8909.45021  | 11163.37906 | 3349.994785 |             |
| 4519.563753 |          |             |             |             |             |
| RALBP1      | RALBP1   | 2129.553048 | 3047.789353 | 2485.710416 |             |
| 2334.25946  |          |             |             |             |             |
| MIDN        | MIDN     | 826.9881473 | 427.563918  | 391.9636756 |             |
| 411.040842  |          |             |             |             |             |
| CD151       | CD151    | 1301.393529 | 1246.130469 | 778.5702166 |             |
| 619.3895256 |          |             |             |             |             |
| TAS2R20     | TAS2R20  | 37.48388203 | 19.29623383 | 24.99996108 |             |
| 27.33987252 |          |             |             |             |             |
| TAS2R50     | TAS2R50  | 1.171371313 | 1.015591254 | 0.892855753 | 0           |
| TAS2R19     | TAS2R19  | 8.199599194 | 9.140321286 | 11.60712479 |             |
| 14.14131337 |          |             |             |             |             |
| TAS2R46     | TAS2R46  | 0           | 1.015591254 | 0.892855753 | 0           |
| TAS2R31     | TAS2R31  | 5.856856567 | 0           | 6.249990271 | 5.656525348 |
| TAS2R43     | TAS2R43  | 15.22782708 | 2.031182508 | 8.92855753  |             |
| 4.713771124 |          |             |             |             |             |
| ESYT1       | ESYT1    | 52320.47109 | 61113.20371 | 18057.11475 |             |
| 22628.92966 |          |             |             |             |             |
| ARHGAP40    | ARHGAP40 |             | 0           | 0           | 6.599279573 |
| PPM1M       | PPM1M    | 3904.180588 | 3976.03976  | 2573.21028  |             |
| 3771.016899 |          |             |             |             |             |
| EPS15       | EPS15    | 6326.576464 | 4045.099965 | 4104.457897 |             |
| 5282.251921 |          |             |             |             |             |
| ARHGEF7     | ARHGEF7  | 2892.115773 | 1756.97287  | 1819.640025 |             |

|             |          |             |             |             |
|-------------|----------|-------------|-------------|-------------|
| 1975.070101 |          |             |             |             |
| ATP6V1F     | ATP6V1F  | 4500.408586 | 6684.621634 | 4843.74246  |
| 4252.764308 |          |             |             |             |
| CAPN1       | CAPN1    | 9472.879812 | 12309.98159 | 5340.170259 |
| 7025.404483 |          |             |             |             |
| SERF2       | SERF2    | 25088.43079 | 27767.28048 | 20259.78989 |
| 19008.75343 |          |             |             |             |
| FAM209B     | FAM209B  | 22.25605496 | 41.63924142 | 49.10706642 |
| 16.96957604 |          |             |             |             |
| C1orf100    | C1orf100 |             | 0 0         | 4.464278765 |
| 0.942754225 |          |             |             |             |
| DCUN1D2     | DCUN1D2  | 373.667449  | 239.679536  | 341.9637534 |
| 389.3574948 |          |             |             |             |
| SLC3A2      | SLC3A2   | 14386.78247 | 19602.94239 | 47585.64021 |
| 26658.26121 |          |             |             |             |
| ZNF682      | ZNF682   | 106.5947895 | 127.964498  | 422.3207712 |
| 268.684954  |          |             |             |             |
| PSMB5       | PSMB5    | 6728.356825 | 9368.829319 | 5715.169675 |
| 6672.814403 |          |             |             |             |
| ELOVL6      | ELOVL6   | 231.9315201 | 155.3854619 | 62.49990271 |
| 152.7261844 |          |             |             |             |
| LEF1        | LEF1     | 11778.13856 | 11615.31717 | 19958.00465 |
| 18033.94556 |          |             |             |             |
| TTC13       | TTC13    | 1355.27661  | 1374.094967 | 771.4273706 |
| 1232.179772 |          |             |             |             |
| RPL22L1     | RPL22L1  | 788.332894  | 579.9026061 | 441.9635978 |
| 761.7454136 |          |             |             |             |
| ARHGEF3     | ARHGEF3  | 7493.262292 | 11474.14999 | 20033.89739 |
| 14747.50434 |          |             |             |             |
| MGA         | MGA      | 2783.178241 | 1577.213218 | 2768.74569  |
| 2777.353946 |          |             |             |             |
| LRRN3       | LRRN3    | 16446.05324 | 22267.85384 | 10269.62687 |
| 10378.78126 |          |             |             |             |
| FAM86C1     | FAM86C1  | 200.3044946 | 262.0225435 | 326.7852056 |
| 363.9031307 |          |             |             |             |
| SMARCD2     | SMARCD2  | 10877.35402 | 14143.1238  | 9864.270359 |
| 9268.216783 |          |             |             |             |
| PANK4       | PANK4    | 3454.374003 | 3882.605364 | 3133.030837 |
| 2567.119754 |          |             |             |             |
| NGFRAP1     | NGFRAP1  | 576.3146862 | 563.653146  | 1403.569244 |
| 983.2926564 |          |             |             |             |
| LRR1        | LRR1     | 3292.724762 | 3892.761277 | 2424.996225 |
| 2386.110943 |          |             |             |             |
| TSPAN13     | TSPAN13  | 345.5545375 | 284.3655511 | 129.4640842 |
| 119.7297865 |          |             |             |             |
| VOPP1       | VOPP1    | 4667.914684 | 4315.247238 | 2640.174462 |
| 2718.903184 |          |             |             |             |
| TDRD3       | TDRD3    | 633.7118806 | 456.0004731 | 241.9639091 |
| 397.8422828 |          |             |             |             |
| CARF        | CARF     | 342.0404235 | 226.4768497 | 383.0351181 |

|             |          |             |             |             |             |
|-------------|----------|-------------|-------------|-------------|-------------|
| 491.1749511 |          |             |             |             |             |
| UQCRB       | UQCRB    | 6196.554248 | 5445.600304 | 3616.958656 |             |
| 3870.006092 |          |             |             |             |             |
| RGS5        | RGS5     | 149.9355281 | 230.5392147 | 250.8924666 |             |
| 232.8602935 |          |             |             |             |             |
| H3F3C       | H3F3C    | 9.370970508 | 5.07795627  | 27.67852834 |             |
| 16.02682182 |          |             |             |             |             |
| SMC03       | SMC03    | 1.171371313 | 0           | 0           | 7.542033798 |
| SLC14A2     | SLC14A2  | 28.11291152 | 24.3741901  | 25.89281684 |             |
| 26.39711829 |          |             |             |             |             |
| CD82        | CD82     | 21612.9721  | 27842.43423 | 13241.05082 |             |
| 16900.75499 |          |             |             |             |             |
| DCDC2       | DCDC2    | 0           | 0           | 0           | 3.771016899 |
| FAM149A     | FAM149A  | 22.25605496 | 22.34300759 | 18.74997081 |             |
| 24.51160984 |          |             |             |             |             |
| KIAA1429    | KIAA1429 |             | 3949.864069 | 1435.030442 |             |
| 2008.925444 |          | 4490.338372 |             |             |             |
| NPIPA1      | NPIPA1   | 66.76816487 | 47.73278894 | 81.24987353 |             |
| 55.62249926 |          |             |             |             |             |
| WDR45       | WDR45    | 3394.634066 | 3519.023695 | 2566.067434 |             |
| 2865.972843 |          |             |             |             |             |
| MITF        | MITF     | 4.685485254 | 10.15591254 | 27.67852834 | 0           |
| DIAPH3      | DIAPH3   | 1604.778699 | 1074.495547 | 512.4992022 |             |
| 694.8098636 |          |             |             |             |             |
| CATSPER2    | CATSPER2 |             | 45.68348122 | 16.24946006 |             |
| 72.321316   |          | 85.79063445 |             |             |             |
| ZMYM2       | ZMYM2    | 2565.303176 | 1666.585248 | 2091.961029 |             |
| 2580.318313 |          |             |             |             |             |
| HRH4        | HRH4     | 58.56856567 | 8.124730032 | 47.32135491 |             |
| 56.56525348 |          |             |             |             |             |
| PRR5L       | PRR5L    | 596.2279986 | 1081.604686 | 508.0349235 |             |
| 396.8995286 |          |             |             |             |             |
| RAD1        | RAD1     | 2842.918178 | 2515.619536 | 2185.710883 |             |
| 2293.721029 |          |             |             |             |             |
| MOBP        | MOBP     | 0           | 0           | 3.571423012 | 0           |
| DHFR        | DHFR     | 5473.818148 | 5087.096592 | 1836.604284 |             |
| 3373.174616 |          |             |             |             |             |
| RNF145      | RNF145   | 3624.222844 | 1475.654092 | 1470.533425 |             |
| 1040.800664 |          |             |             |             |             |
| POGLUT1     | POGLUT1  | 1950.333237 | 2445.54374  | 1584.818962 |             |
| 1954.329508 |          |             |             |             |             |
| AMPD2       | AMPD2    | 3106.476723 | 4104.004258 | 3850.886863 |             |
| 3680.512493 |          |             |             |             |             |
| IFT20       | IFT20    | 884.3853417 | 981.0611514 | 1173.212459 |             |
| 1065.312274 |          |             |             |             |             |
| RAB42       | RAB42    | 0           | 5.07795627  | 0           | 0           |
| SLC8A3      | SLC8A3   | 1.171371313 | 0           | 0           | 0           |
| DENND2C     | DENND2C  | 37.48388203 | 26.40537261 | 82.14272928 |             |
| 59.39351616 |          |             |             |             |             |
| KNG1        | KNG1     | 8.199599194 | 6.093547524 | 1.785711506 |             |



|             |          |             |             |             |
|-------------|----------|-------------|-------------|-------------|
| 0.942754225 |          |             |             |             |
| SIKE1       | SIKE1    | 2899.144001 | 2208.910978 | 2505.353243 |
| 3230.818728 |          |             |             |             |
| KCNE1       | KCNE1    | 0           | 0           | 1.785711506 |
| DYNC1I1     | DYNC1I1  | 2.342742627 | 0           | 0           |
| FKTN        | FKTN     | 631.369138  | 434.6730567 | 344.6423207 |
| 665.5844826 |          |             |             |             |
| ITGA2       | ITGA2    | 828.1595186 | 362.5660777 | 44.64278765 |
| 120.6725408 |          |             |             |             |
| SERAC1      | SERAC1   | 1058.919667 | 1359.876689 | 970.5342035 |
| 962.5520634 |          |             |             |             |
| SFXN2       | SFXN2    | 1448.986315 | 1761.035235 | 833.9272733 |
| 1306.657355 |          |             |             |             |
| PKDCC       | PKDCC    | 1.171371313 | 0           | 0           |
| SREK1IP1    | SREK1IP1 | 752.6773998 | 974.5809328 | 825.6756895 |
| 768.3446931 |          |             |             |             |
| RELL2       | RELL2    | 1002.693844 | 695.680009  | 878.570061  |
| 975.7506226 |          |             |             |             |
| AP5B1       | AP5B1    | 2541.87575  | 2588.742107 | 2730.352893 |
| 2503.955221 |          |             |             |             |
| RABL3       | RABL3    | 2668.383852 | 2858.88938  | 2546.424608 |
| 2528.466831 |          |             |             |             |
| FAM126B     | FAM126B  | 2452.85153  | 2049.463151 | 2566.96029  |
| 2512.440009 |          |             |             |             |
| LIMK1       | LIMK1    | 452.149327  | 153.3542794 | 326.7852056 |
| 286.5972843 |          |             |             |             |
| CLDN4       | CLDN4    | 7.028227881 | 0           | 0           |
| CCR1        | CCR1     | 401.7803605 | 676.3837752 | 217.8568037 |
| 556.2249926 |          |             |             |             |
| CPD         | CPD      | 3416.890121 | 1915.405105 | 2021.425425 |
| 2515.268272 |          |             |             |             |
| CDC42BPB    | CDC42BPB |             | 30.45565415 | 36.56128515 |
| 144.642632  |          | 111.2449985 |             |             |
| SRSF11      | SRSF11   | 6867.750011 | 6983.205463 | 5973.204988 |
| 6060.024156 |          |             |             |             |
| THY1        | THY1     | 11.71371313 | 14.21827756 | 11.60712479 |
| 36.76741476 |          |             |             |             |
| PPP1CA      | PPP1CA   | 31225.2451  | 47079.76376 | 19787.4692  |
| 21997.28433 |          |             |             |             |
| SLC22A15    | SLC22A15 |             | 53.88308042 | 19.29623383 |
| 18.74997081 |          | 82.96237177 |             |             |
| TP73        | TP73     | 277.6150013 | 197.0247033 | 106.2498346 |
| 140.4703795 |          |             |             |             |
| KIAA0586    | KIAA0586 |             | 1706.688004 | 1416.749799 |
| 1704.461633 |          | 2090.086116 |             |             |
| NT5C1B      | NT5C1B   | 14.05645576 | 21.32741634 | 48.21421066 |
| 28.28262674 |          |             |             |             |
| TBC1D15     | TBC1D15  | 3920.579786 | 3123.958697 | 4547.31435  |
| 4222.596173 |          |             |             |             |
| ALDH2       | ALDH2    | 9.370970508 | 10.15591254 | 102.6784116 |

|             |             |             |             |             |             |
|-------------|-------------|-------------|-------------|-------------|-------------|
| 75.42033798 |             |             |             |             |             |
| ZNF609      | ZNF609      | 756.7058685 | 417.4080054 | 466.0707031 |             |
| 596.7634242 |             |             |             |             |             |
| DFNA5       | DFNA5       | 138.221815  | 219.3677109 | 150.8926223 |             |
| 190.4363534 |             |             |             |             |             |
| ZNF319      | ZNF319      | 709.851016  | 354.4413477 | 604.4633448 |             |
| 564.7097806 |             |             |             |             |             |
| TNFRSF21    | TNFRSF21    |             | 22.25605496 | 34.53010264 | 0           |
| 101.8174563 |             |             |             |             |             |
| ZFAND2B     | ZFAND2B     | 2127.210305 | 2574.523829 | 2711.602922 |             |
| 2527.524076 |             |             |             |             |             |
| ST3GAL4     | ST3GAL4     | 411.151331  | 406.2365016 | 157.1426125 |             |
| 175.3522858 |             |             |             |             |             |
| FLJ20021    | FLJ20021    |             | 80.82462063 | 47.73278894 |             |
| 74.99988325 | 77.30584643 |             |             |             |             |
| MIR18A      | MIR18A      | 0           | 0           | 0.892855753 | 0           |
| C17orf62    | C17orf62    |             | 11302.5618  | 12504.97511 |             |
| 8181.237265 | 8720.476579 |             |             |             |             |
| MURC        | MURC        | 2.342742627 | 7.109138778 | 0           | 0.942754225 |
| CYP2W1      | CYP2W1      | 0           | 0           | 2.678567259 | 0           |
| CHD7        | CHD7        | 1601.264586 | 1837.204579 | 3899.993929 |             |
| 3462.736267 |             |             |             |             |             |
| CCDC146     | CCDC146     | 89.02421982 | 66.01343151 | 275.8924277 |             |
| 138.584871  |             |             |             |             |             |
| CCT3        | CCT3        | 24092.76518 | 33539.90117 | 22537.46492 |             |
| 23816.79998 |             |             |             |             |             |
| FBXW11      | FBXW11      | 4045.916517 | 2645.615217 | 3057.138098 |             |
| 3093.176611 |             |             |             |             |             |
| BC01        | BC01        | 0           | 0           | 0.892855753 | 0           |
| SPA17       | SPA17       | 217.8750643 | 202.1026596 | 164.2854586 |             |
| 146.1269048 |             |             |             |             |             |
| MYEOV       | MYEOV       | 3.51411394  | 0           | 0           | 8.484788022 |
| CDC42EP3    | CDC42EP3    |             | 1712.54486  | 1261.364338 |             |
| 2452.674754 | 3293.040507 |             |             |             |             |
| DAAM1       | DAAM1       | 1368.161694 | 912.0009461 | 731.2488617 |             |
| 651.4431693 |             |             |             |             |             |
| ADNP2       | ADNP2       | 1794.540852 | 1325.346587 | 1278.569438 |             |
| 1433.929176 |             |             |             |             |             |
| EDRF1       | EDRF1       | 2315.801087 | 2015.948639 | 1930.354138 |             |
| 2253.182597 |             |             |             |             |             |
| JADE2       | JADE2       | 1485.298825 | 1556.901392 | 3716.065644 |             |
| 2675.53649  |             |             |             |             |             |
| GPR150      | GPR150      | 21.08468364 | 11.17150379 | 80.35701777 |             |
| 38.65292321 |             |             |             |             |             |
| KRT79       | KRT79       | 0           | 5.07795627  | 1.785711506 | 4.713771124 |
| SNX25       | SNX25       | 1135.058803 | 780.9896744 | 1122.319682 |             |
| 1456.555277 |             |             |             |             |             |
| ZNF681      | ZNF681      | 231.9315201 | 192.9623383 | 423.2136269 |             |
| 441.2089772 |             |             |             |             |             |
| NUP35       | NUP35       | 1841.395705 | 1850.407265 | 1543.747597 |             |

|             |         |             |             |             |             |
|-------------|---------|-------------|-------------|-------------|-------------|
| 1830.828704 |         |             |             |             |             |
| IL17D       | IL17D   | 5.856856567 | 6.093547524 | 28.5713841  |             |
| 15.0840676  |         |             |             |             |             |
| SYNGR1      | SYNGR1  | 3.51411394  | 25.38978135 | 70.53560449 |             |
| 11.3130507  |         |             |             |             |             |
| TTC7A       | TTC7A   | 13962.74606 | 15988.45311 | 6567.846919 |             |
| 8821.351281 |         |             |             |             |             |
| IFT43       | IFT43   | 303.3851702 | 362.5660777 | 401.7850889 |             |
| 350.7045716 |         |             |             |             |             |
| TRPT1       | TRPT1   | 2019.444144 | 1949.935208 | 1993.746897 |             |
| 2122.13976  |         |             |             |             |             |
| ERBB2       | ERBB2   | 215.5323217 | 181.7908345 | 408.9279349 |             |
| 293.1965639 |         |             |             |             |             |
| PRNP        | PRNP    | 4915.074031 | 4847.417056 | 8792.843456 |             |
| 8863.775221 |         |             |             |             |             |
| COPZ1       | COPZ1   | 8378.819005 | 9442.96748  | 7008.917661 |             |
| 6799.143469 |         |             |             |             |             |
| GDAP2       | GDAP2   | 2034.671971 | 1864.625542 | 1469.640569 |             |
| 1720.52646  |         |             |             |             |             |
| CCDC126     | CCDC126 | 689.9377036 | 483.4214369 | 743.7488423 |             |
| 900.3302846 |         |             |             |             |             |
| DTNB        | DTNB    | 1118.659604 | 1046.058992 | 1065.176913 |             |
| 1000.262232 |         |             |             |             |             |
| CIDEC       | CIDEC   | 0           | 5.07795627  | 0           | 7.542033798 |
| B3GNT7      | B3GNT7  | 4.685485254 | 0           | 0           | 0           |
| DDX50       | DDX50   | 2605.129801 | 2755.299072 | 2677.674403 |             |
| 3154.455636 |         |             |             |             |             |
| METR1       | METR1   | 473.2340106 | 443.813378  | 438.3921747 |             |
| 372.3879188 |         |             |             |             |             |
| SCNM1       | SCNM1   | 2454.022902 | 3481.446819 | 2843.745573 |             |
| 2192.846327 |         |             |             |             |             |
| ZNF311      | ZNF311  | 1.171371313 | 1.015591254 | 8.92855753  |             |
| 1.885508449 |         |             |             |             |             |
| RAB12       | RAB12   | 31.62702546 | 23.35859884 | 67.85703723 |             |
| 36.76741476 |         |             |             |             |             |
| C3orf70     | C3orf70 | 4.685485254 | 0           | 0           | 0           |
| CAB39       | CAB39   | 16635.81539 | 18742.73659 | 12755.33729 |             |
| 12061.59755 |         |             |             |             |             |
| TEAD1       | TEAD1   | 2.342742627 | 3.046773762 | 15.1785478  |             |
| 1.885508449 |         |             |             |             |             |
| C1QL1       | C1QL1   | 9.370970508 | 2.031182508 | 2.678567259 |             |
| 3.771016899 |         |             |             |             |             |
| ETV5        | ETV5    | 24.59879758 | 58.90429273 | 61.60704696 |             |
| 15.0840676  |         |             |             |             |             |
| FXD5        | FXD5    | 9450.623757 | 14173.59154 | 8824.986263 |             |
| 9174.884115 |         |             |             |             |             |
| FAM26F      | FAM26F  | 69.11090749 | 372.7219902 | 450.8921553 |             |
| 177.2377942 |         |             |             |             |             |
| MUC21       | MUC21   | 0           | 1.015591254 | 0           | 0           |
| GRIA4       | GRIA4   | 0           | 0           | 0           | 5.656525348 |

|              |              |             |             |             |             |
|--------------|--------------|-------------|-------------|-------------|-------------|
| KANK2        | KANK2        | 221.3891782 | 206.1650246 | 66.96418148 |             |
| 75.42033798  |              |             |             |             |             |
| ISOC2        | ISOC2        | 1567.294817 | 1745.801366 | 871.427215  |             |
| 988.0064275  |              |             |             |             |             |
| ECSCR        | ECSCR        | 30.45565415 | 39.60805891 | 9.821413283 |             |
| 12.25580492  |              |             |             |             |             |
| PTGER4       | PTGER4       | 7496.776406 | 7235.072094 | 5614.276975 |             |
| 7790.920913  |              |             |             |             |             |
| SULT1A1      | SULT1A1      | 376.0101916 | 342.2542526 | 245.5353321 |             |
| 382.7582152  |              |             |             |             |             |
| SULT1A2      | SULT1A2      | 9.370970508 | 4.062365016 | 18.74997081 |             |
| 12.25580492  |              |             |             |             |             |
| LOC100128770 | LOC100128770 |             | 7.028227881 | 7.109138778 | 0           |
| 2.828262674  |              |             |             |             |             |
| KIAA1217     | KIAA1217     |             | 558.7441165 | 210.2273896 |             |
| 87.4998638   | 310.1661399  |             |             |             |             |
| CAMTA1       | CAMTA1       | 1333.020555 | 1223.787461 | 1350.890754 |             |
| 1346.253033  |              |             |             |             |             |
| MKRN9P       | MKRN9P       | 1.171371313 | 0           | 2.678567259 | 0           |
| FBXW4P1      | FBXW4P1      | 43.3407386  | 54.84192772 | 54.46420093 |             |
| 20.74059294  |              |             |             |             |             |
| TYW3         | TYW3         | 1518.097222 | 1892.046506 | 1730.354449 |             |
| 1407.532058  |              |             |             |             |             |
| PDHB         | PDHB         | 7831.788602 | 8851.89337  | 5241.956126 |             |
| 6596.45131   |              |             |             |             |             |
| CTPS1        | CTPS1        | 7848.1878   | 10675.89526 | 6009.812074 |             |
| 6028.913267  |              |             |             |             |             |
| UHRF1        | UHRF1        | 16619.4162  | 19637.47249 | 7956.237615 |             |
| 12112.50628  |              |             |             |             |             |
| NONO         | NONO         | 23562.13397 | 27508.30471 | 22338.35809 |             |
| 22359.30195  |              |             |             |             |             |
| SFTPD        | SFTPD        | 0           | 1.015591254 | 0           | 0.942754225 |
| APC          | APC          | 1376.361293 | 971.9208301 | 1600.890365 |             |
| 1843.084509  |              |             |             |             |             |
| SHROOM1      | SHROOM1      | 19.91331233 | 44.68601518 | 4.464278765 |             |
| 14.14131337  |              |             |             |             |             |
| FOLH1        | FOLH1        | 0           | 0           | 1.885508449 |             |
| PPM1F        | PPM1F        | 1268.595132 | 1161.836395 | 1058.034067 |             |
| 1367.93638   |              |             |             |             |             |
| DSCR3        | DSCR3        | 4310.646434 | 5726.919082 | 7183.024533 |             |
| 5335.988912  |              |             |             |             |             |
| ITGB6        | ITGB6        | 0           | 0           | 2.678567259 | 0           |
| ADAMTS10     | ADAMTS10     |             | 92.53833376 | 17.26505132 |             |
| 115.1783921  | 112.1877527  |             |             |             |             |
| ARHGAP11A    | ARHGAP11A    |             | 6627.618892 | 6104.719028 |             |
| 2115.175279  | 3503.274699  |             |             |             |             |
| TNFRSF14     | TNFRSF14     |             | 4770.99536  | 4139.549952 |             |
| 3116.066578  | 4397.005704  |             |             |             |             |
| RB1CC1       | RB1CC1       | 3591.424447 | 3182.86299  | 4400.886007 |             |
| 4741.110996  |              |             |             |             |             |

|                |                |             |             |             |             |
|----------------|----------------|-------------|-------------|-------------|-------------|
| CLCN1          | CLCN1          | 11.71371313 | 2.031182508 | 0           | 8.484788022 |
| IL1B           | IL1B           | 0           | 38.39279738 | 0           | 2.828262674 |
| AGA            | AGA            | 1562.609332 | 1766.113191 | 0           | 1149.99821  |
| 1430.158159    |                |             |             |             |             |
| CTSG           | CTSG           | 0           | 0           | 0.942754225 |             |
| ZNF133         | ZNF133         | 434.5787573 | 626.6198037 | 0           | 680.3560838 |
| 666.5272369    |                |             |             |             |             |
| CCL4L1         | CCL4L1         | 1.171371313 | 0           | 10.71426904 | 12.25580492 |
| CHIC2          | CHIC2          | 1265.081019 | 1456.357858 | 0           | 2057.139655 |
| 1646.991631    |                |             |             |             |             |
| HAVCR1         | HAVCR1         | 85.51010588 | 41.63924142 | 0           | 44.64278765 |
| 31.11088942    |                |             |             |             |             |
| RSPRY1         | RSPRY1         | 2697.668135 | 3092.475369 | 0           | 2845.531285 |
| 2862.201826    |                |             |             |             |             |
| MED22          | MED22          | 2558.274949 | 2716.706605 | 0           | 2356.246332 |
| 2508.668992    |                |             |             |             |             |
| ZFYVE27        | ZFYVE27        | 2007.730431 | 1969.231442 | 0           | 2899.995486 |
| 2414.393569    |                |             |             |             |             |
| TMEM190        | TMEM190        | 2.342742627 | 0           | 7.142846024 | 0           |
| TDP2           | TDP2           | 3398.14818  | 3183.878581 | 0           | 2763.388556 |
| 2994.187418    |                |             |             |             |             |
| ACTR6          | ACTR6          | 2163.522816 | 2076.884115 | 0           | 2608.92451  |
| 2548.264669    |                |             |             |             |             |
| ABCG1          | ABCG1          | 288.1573431 | 368.6596252 | 0           | 590.1776528 |
| 429.8959265    |                |             |             |             |             |
| STXBP5L        | STXBP5L        | 5.856856567 | 4.062365016 | 0           | 6.599279573 |
| TICAM1         | TICAM1         | 2297.059146 | 1744.785774 | 0           | 1092.855442 |
| 1424.501634    |                |             |             |             |             |
| MMP24-AS1      | MMP24-AS1      |             | 433.407386  | 0           | 175.697287  |
| 215.1782365    | 280.940759     |             |             |             |             |
| EDA            | EDA            | 0           | 9.140321286 | 136.6069302 | 12.25580492 |
| TCHHL1         | TCHHL1         | 1.171371313 | 0           | 0           | 0           |
| KRT7           | KRT7           | 90.19559114 | 477.3278894 | 0           | 179.4640064 |
| 106.5312274    |                |             |             |             |             |
| TMEM189-UBE2V1 | TMEM189-UBE2V1 |             | 13384.08863 | 0           | 14945.44089 |
| 8257.130004    | 11448.8073     |             |             |             |             |
| THEG           | THEG           | 1.171371313 | 0           | 0           | 0           |
| DNMT3A         | DNMT3A         | 1922.220325 | 1791.502972 | 0           | 2050.889665 |
| 2058.975227    |                |             |             |             |             |
| HSD17B4        | HSD17B4        | 2726.952418 | 2630.381348 | 0           | 1849.104265 |
| 2579.375559    |                |             |             |             |             |
| NLRC4          | NLRC4          | 33.96976809 | 15.23386881 | 0           | 9.821413283 |
| 49.02321969    |                |             |             |             |             |
| NUP153         | NUP153         | 3883.095904 | 1487.841187 | 0           | 1316.06938  |
| 1517.834302    |                |             |             |             |             |
| NR1H4          | NR1H4          | 0           | 0           | 1.885508449 |             |
| KIR3DX1        | KIR3DX1        | 4.685485254 | 0           | 15.1785478  | 7.542033798 |
| SNRNP35        | SNRNP35        | 1747.686    | 1949.935208 | 0           | 1569.640414 |
| 1482.009641    |                |             |             |             |             |
| SYNGAP1        | SYNGAP1        | 5.856856567 | 1.015591254 | 0           | 2.678567259 |

|             |          |             |             |             |             |
|-------------|----------|-------------|-------------|-------------|-------------|
| 6.599279573 |          |             |             |             |             |
| RUNDC1      | RUNDC1   | 1560.26659  | 2034.229282 | 2362.496323 |             |
| 2127.796285 |          |             |             |             |             |
| MYB         | MYB      | 4912.731289 | 6655.169488 | 2198.210864 |             |
| 2493.584924 |          |             |             |             |             |
| LANCL3      | LANCL3   | 15.22782708 | 28.43655511 | 8.035701777 |             |
| 14.14131337 |          |             |             |             |             |
| ALG1L       | ALG1L    | 11.71371313 | 13.2026863  | 79.46416202 |             |
| 41.48118589 |          |             |             |             |             |
| KRBOX4      | KRBOX4   | 734.4498135 | 751.537528  | 1075.891182 |             |
| 1001.204987 |          |             |             |             |             |
| CSPG5       | CSPG5    | 7.028227881 | 8.124730032 | 34.82137437 |             |
| 10.37029647 |          |             |             |             |             |
| RAB35       | RAB35    | 3406.34778  | 1906.264784 | 1249.105198 |             |
| 1220.866721 |          |             |             |             |             |
| CTSA        | CTSA     | 7226.189633 | 8944.312174 | 9611.592181 |             |
| 9460.538645 |          |             |             |             |             |
| AURKA       | AURKA    | 7936.040649 | 10492.07325 | 2782.138526 |             |
| 4803.332775 |          |             |             |             |             |
| CUL3        | CUL3     | 7216.818662 | 6334.242652 | 6517.846997 |             |
| 6558.741141 |          |             |             |             |             |
| CUL4A       | CUL4A    | 11881.21923 | 10999.86887 | 7790.166445 |             |
| 7930.448538 |          |             |             |             |             |
| BRPF1       | BRPF1    | 4733.511478 | 4533.599358 | 4730.34978  |             |
| 4128.32075  |          |             |             |             |             |
| CARM1       | CARM1    | 468.5485254 | 190.9311558 | 195.5354099 |             |
| 173.4667773 |          |             |             |             |             |
| RASGRP3     | RASGRP3  | 2109.639736 | 2025.088961 | 1773.211526 |             |
| 1393.390744 |          |             |             |             |             |
| CXADRP2     | CXADRP2  | 0           | 0           | 5.656525348 |             |
| INIP        | INIP     | 2401.311193 | 2633.428122 | 2590.17454  |             |
| 2626.51327  |          |             |             |             |             |
| ZNF71       | ZNF71    | 730.9356996 | 913.0165374 | 1013.39128  |             |
| 823.9671924 |          |             |             |             |             |
| SLC22A16    | SLC22A16 |             | 1.171371313 | 1.015591254 | 0           |
| 0           |          |             |             |             |             |
| WRNIP1      | WRNIP1   | 4282.533522 | 5368.415369 | 4588.385715 |             |
| 4890.066164 |          |             |             |             |             |
| RPL13A      | RPL13A   | 17975.86418 | 20840.94812 | 32541.91363 |             |
| 26470.65312 |          |             |             |             |             |
| NET1        | NET1     | 3364.178412 | 3246.845239 | 1387.49784  |             |
| 1591.369131 |          |             |             |             |             |
| ADORA3      | ADORA3   | 1.171371313 | 13.2026863  | 0           | 4.713771124 |
| ABAT        | ABAT     | 1596.5791   | 2112.429808 | 658.9275457 |             |
| 724.0352446 |          |             |             |             |             |
| RSRP1       | RSRP1    | 2774.978642 | 2183.521196 | 2996.423907 |             |
| 2948.935215 |          |             |             |             |             |
| HLA-DRA     | HLA-DRA  | 1363.476209 | 701.7735565 | 239.2853418 |             |
| 601.4771954 |          |             |             |             |             |
| RARG        | RARG     | 1746.514628 | 1520.340107 | 1779.461516 |             |

|              |              |             |             |             |             |
|--------------|--------------|-------------|-------------|-------------|-------------|
| 2030.6926    |              |             |             |             |             |
| IL18         | IL18         | 2.342742627 | 5.07795627  | 0           | 3.771016899 |
| BPIFA1       | BPIFA1       | 0           | 0           | 1.885508449 |             |
| CFL2         | CFL2         | 306.8992841 | 173.6661044 | 456.2492898 |             |
| 550.5684672  |              |             |             |             |             |
| ABHD2        | ABHD2        | 4430.126308 | 3415.433387 | 2501.78182  |             |
| 2873.514877  |              |             |             |             |             |
| SLU7         | SLU7         | 4581.233207 | 5194.749264 | 7358.024261 |             |
| 6359.82      |              |             |             |             |             |
| C10orf12     | C10orf12     |             | 740.3066701 | 582.9493798 |             |
| 781.2487839  | 513.8010525  |             |             |             |             |
| PLEKHJ1      | PLEKHJ1      | 3862.01122  | 5247.56001  | 3488.387427 |             |
| 3218.562923  |              |             |             |             |             |
| TLE6         | TLE6         | 4.685485254 | 17.26505132 | 0           | 6.599279573 |
| CAST         | CAST         | 3550.426451 | 3510.898965 | 3892.851083 |             |
| 5172.892431  |              |             |             |             |             |
| ZMIZ1        | ZMIZ1        | 2190.464356 | 1311.128309 | 696.4274874 |             |
| 1140.732612  |              |             |             |             |             |
| TOB1         | TOB1         | 2833.547207 | 939.42191   | 1216.962391 |             |
| 2223.014462  |              |             |             |             |             |
| YAF2         | YAF2         | 652.4538216 | 436.7042392 | 438.3921747 |             |
| 563.7670264  |              |             |             |             |             |
| NAMPT        | NAMPT        | 9250.319262 | 7646.386552 | 8583.91521  |             |
| 10453.25884  |              |             |             |             |             |
| RBM5         | RBM5         | 5537.072199 | 5441.537939 | 6703.560994 |             |
| 6255.174281  |              |             |             |             |             |
| LSM6         | LSM6         | 2163.522816 | 1863.609951 | 1684.818806 |             |
| 2056.146964  |              |             |             |             |             |
| CTDP1        | CTDP1        | 4084.57177  | 3859.246765 | 4131.243569 |             |
| 3490.07614   |              |             |             |             |             |
| DYNC2H1      | DYNC2H1      | 79.65324932 | 41.63924142 | 72.321316   |             |
| 124.4435577  |              |             |             |             |             |
| LYRM4        | LYRM4        | 1500.526653 | 1360.89228  | 1234.819506 |             |
| 1515.948793  |              |             |             |             |             |
| RNF32        | RNF32        | 74.96776406 | 106.6370817 | 68.74989298 |             |
| 96.16093092  |              |             |             |             |             |
| BLCAP        | BLCAP        | 1740.657772 | 2071.806158 | 3291.066306 |             |
| 2282.407978  |              |             |             |             |             |
| HIST1H4A     | HIST1H4A     |             | 25.7701689  | 21.32741634 |             |
| 18.74997081  |              |             |             |             |             |
| 8.484788022  | 6904.062522  |             | 7690.056976 | 7922.309097 |             |
| NAP1L1       | NAP1L1       |             |             |             |             |
| 8290.580652  |              |             |             |             |             |
| MAP3K3       | MAP3K3       | 4310.646434 | 3893.776868 | 6249.097415 |             |
| 5072.960483  |              |             |             |             |             |
| TATDN3       | TATDN3       | 1347.07701  | 1348.705185 | 1049.998366 |             |
| 1051.170961  |              |             |             |             |             |
| NUP50-AS1    | NUP50-AS1    |             | 284.6432292 | 240.6951272 |             |
| 333.0351959  |              |             |             |             |             |
| 193.2646161  | LOC100507564 |             | 36.31251072 | 28.43655511 |             |
| LOC100507564 | LOC100507564 |             |             |             |             |
| 20.53568232  |              |             |             |             |             |
| 41.48118589  |              |             |             |             |             |

|             |             |             |                 |               |
|-------------|-------------|-------------|-----------------|---------------|
| MTA1        | MTA1        | 880.8712277 | 268.1160911     | 258.9281684   |
| 401.6132997 |             |             |                 |               |
| GAREML      | GAREML      | 215.5323217 | 205.1494333     | 218.7496595   |
| 439.3234687 |             |             |                 |               |
| TRIP13      | TRIP13      | 4762.795761 | 6389.084579     | 1928.568427   |
| 2700.990854 |             |             |                 |               |
| MAP3K2      | MAP3K2      | 5214.945088 | 3928.306971     | 4860.706719   |
| 5916.725514 |             |             |                 |               |
| MGC72080    | MGC72080    |             | 1231.11125      | 1204.491227   |
| 861.6058017 | 1155.81668  |             |                 |               |
| LOC400927   | LOC400927   |             | 137.0504437     | 102.5747167   |
| 79.46416202 | 137.6421168 |             |                 |               |
| MRPS31P5    | MRPS31P5    |             | 210.8468364     | 149.2919143   |
| 257.1424569 | 329.9639787 |             |                 |               |
| TPTE2P6     | TPTE2P6     | 10.54234182 | 4.062365016     | 0 1.885508449 |
| AQP7P1      | AQP7P1      | 2.342742627 | 0 0             | 4.713771124   |
| ZC3HC1      | ZC3HC1      | 2388.426108 | 2965.526462     | 2122.318125   |
| 1958.100525 |             |             |                 |               |
| PAPD4       | PAPD4       | 4535.549726 | 4424.931094     | 4596.421417   |
| 4398.891213 |             |             |                 |               |
| DDHD2       | DDHD2       | 2724.609675 | 2704.51951      | 2724.995758   |
| 3084.691823 |             |             |                 |               |
| FKBP11      | FKBP11      | 1393.931863 | 1447.217537     | 2706.245787   |
| 2632.169795 |             |             |                 |               |
| CCDC120     | CCDC120     | 96.0524477  | 41.63924142     | 74.99988325   |
| 71.64932108 |             |             |                 |               |
| SLC2A11     | SLC2A11     | 148.7641568 | 109.6838554     | 153.5711895   |
| 191.3791076 |             |             |                 |               |
| POM121L1P   | POM121L1P   |             | 0 1.015591254 0 |               |
| 0.942754225 |             |             |                 |               |
| MAGED2      | MAGED2      | 3215.414255 | 4542.739679     | 17248.18744   |
| 8623.372893 |             |             |                 |               |
| COPE        | COPE        | 16251.6056  | 20016.28803     | 11433.91077   |
| 11236.6876  |             |             |                 |               |
| ACSL1       | ACSL1       | 2532.50478  | 3238.720509     | 2908.924043   |
| 2244.697809 |             |             |                 |               |
| ZFP64       | ZFP64       | 821.1312907 | 1125.275109     | 1024.998404   |
| 886.1889712 |             |             |                 |               |
| SOCS4       | SOCS4       | 1543.867391 | 1118.165971     | 772.3202264   |
| 1126.591299 |             |             |                 |               |
| POLQ        | POLQ        | 3384.091725 | 2115.476582     | 877.6772052   |
| 1106.79346  |             |             |                 |               |
| SS18L1      | SS18L1      | 294.0141997 | 145.2295493     | 231.24964     |
| 240.4023273 |             |             |                 |               |
| PYHIN1      | PYHIN1      | 3401.662294 | 2280.002365     | 2587.495972   |
| 3870.006092 |             |             |                 |               |
| GINS4       | GINS4       | 1789.855367 | 1605.649773     | 575.8919607   |
| 1037.029647 |             |             |                 |               |
| CAPRIN1     | CAPRIN1     | 25985.70122 | 24530.59115     | 17374.0801    |
| 21295.87518 |             |             |                 |               |



|             |             |             |             |             |
|-------------|-------------|-------------|-------------|-------------|
| DDI2        | DDI2        | 1306.079015 | 1319.253039 | 1160.712479 |
| 930.4984198 |             |             |             |             |
| ZNF438      | ZNF438      | 481.4336098 | 376.7843553 | 591.9633643 |
| 653.3286777 |             |             |             |             |
| MCM10       | MCM10       | 6350.00389  | 6867.42806  | 2201.782287 |
| 3528.729063 |             |             |             |             |
| ZNF845      | ZNF845      | 1165.514457 | 1283.707345 | 2084.818183 |
| 1886.451204 |             |             |             |             |
| PCED1B      | PCED1B      | 3737.845861 | 5018.036386 | 5148.206272 |
| 4189.599775 |             |             |             |             |
| FAM57A      | FAM57A      | 161.6492413 | 188.8999733 | 206.249679  |
| 167.810252  |             |             |             |             |
| RNF39       | RNF39       | 107.7661608 | 157.4166444 | 195.5354099 |
| 118.7870323 |             |             |             |             |
| H2AFB3      | H2AFB3      | 0           | 1.015591254 | 0.892855753 |
|             |             |             |             | 3.771016899 |
| DPEP2       | DPEP2       | 391.2380187 | 414.3612317 | 720.5345927 |
| 574.1373229 |             |             |             |             |
| OSGEPL1     | OSGEPL1     | 636.0546232 | 583.9649711 | 755.3559671 |
| 882.4179543 |             |             |             |             |
| C10orf54    | C10orf54    |             | 5906.054162 | 6619.623794 |
| 6450.882816 | 6933.957323 |             |             |             |
| NECAB1      | NECAB1      | 74.96776406 | 68.04461402 | 158.0354683 |
| 141.4131337 |             |             |             |             |
| CALML4      | CALML4      | 479.0908672 | 391.0026328 | 233.0353515 |
| 304.5096146 |             |             |             |             |
| RAD51D      | RAD51D      | 2032.329229 | 1832.126622 | 1424.997782 |
| 1488.608921 |             |             |             |             |
| BTNL8       | BTNL8       | 26.94154021 | 49.76397145 | 0           |
|             |             |             |             | 28.28262674 |
| CRELD2      | CRELD2      | 4187.652446 | 5318.651397 | 3300.887719 |
| 2973.446825 |             |             |             |             |
| SEMA3B      | SEMA3B      | 11.71371313 | 0           | 23.21424958 |
|             |             |             |             | 8.484788022 |
| FAM183A     | FAM183A     | 0           | 0           | 3.571423012 |
|             |             |             |             | 0           |
| PQBP1       | PQBP1       | 3018.623875 | 3970.961803 | 3699.994241 |
| 3425.026098 |             |             |             |             |
| PTBP2       | PTBP2       | 390.0666474 | 282.3343686 | 706.2489006 |
| 481.7474088 |             |             |             |             |
| CD163L1     | CD163L1     | 0           | 0           | 1.885508449 |
|             |             |             |             |             |
| CD5         | CD5         | 15501.92796 | 19249.51663 | 15767.8326  |
| 20455.88117 |             |             |             |             |
| ZNHIT2      | ZNHIT2      | 614.9699396 | 791.1455869 | 1151.783921 |
| 770.2302016 |             |             |             |             |
| AP2A1       | AP2A1       | 2033.5006   | 986.1391077 | 899.9985991 |
| 1080.396342 |             |             |             |             |
| UBE2Q2P2    | UBE2Q2P2    |             | 1.171371313 | 2.031182508 |
| 3.571423012 | 0           |             |             |             |
| SNORD93     | SNORD93     | 0           | 3.046773762 | 0.892855753 |
|             |             |             |             | 0           |
| LOC644936   | LOC644936   |             | 0           | 2.031182508 |
|             |             |             |             | 0           |
| 1.885508449 |             |             |             |             |
| RDH11       | RDH11       | 3141.617863 | 3896.823642 | 4456.243063 |
| 4458.284729 |             |             |             |             |

|             |            |             |             |             |             |
|-------------|------------|-------------|-------------|-------------|-------------|
| RGS12       | RGS12      | 120.6512453 | 89.37203036 | 147.3211993 |             |
| 152.7261844 |            |             |             |             |             |
| SNORA24     | SNORA24    | 23.42742627 | 19.29623383 | 18.74997081 |             |
| 37.71016899 |            |             |             |             |             |
| DEFB109P1B  | DEFB109P1B |             | 2.342742627 | 0           | 0           |
| SNORD67     | SNORD67    | 4.685485254 | 6.093547524 | 1.785711506 | 0           |
| 3.771016899 |            |             |             |             |             |
| SNORD65     | SNORD65    | 7.028227881 | 7.109138778 | 28.5713841  |             |
| 13.19855915 |            |             |             |             |             |
| SNORA11     | SNORA11    | 8.199599194 | 3.046773762 | 56.24991244 |             |
| 11.3130507  |            |             |             |             |             |
| NISCH       | NISCH      | 3184.958601 | 2836.546373 | 3041.066695 |             |
| 2839.575725 |            |             |             |             |             |
| SNORD59B    | SNORD59B   |             | 65.59679355 | 43.67042392 |             |
| 73.21417175 |            |             |             |             |             |
| PAPD7       | PAPD7      | 365.4678498 | 194.9935208 | 394.6422428 |             |
| 312.9944026 |            |             |             |             |             |
| NXT2        | NXT2       | 1885.907815 | 1741.739001 | 1900.889898 |             |
| 1703.556884 |            |             |             |             |             |
| DHTKD1      | DHTKD1     | 2370.855538 | 2626.318983 | 1398.212109 |             |
| 1380.192185 |            |             |             |             |             |
| FADS6       | FADS6      | 0           | 0           | 0.942754225 |             |
| LSM14B      | LSM14B     | 138.221815  | 70.07579653 | 115.1783921 |             |
| 81.07686333 |            |             |             |             |             |
| ZC4H2       | ZC4H2      | 872.6716285 | 649.9784026 | 1070.534048 |             |
| 996.4912155 |            |             |             |             |             |
| KLF10       | KLF10      | 2355.627711 | 2504.448032 | 5099.992061 |             |
| 3667.313934 |            |             |             |             |             |
| NPIPB5      | NPIPB5     | 343.2117948 | 172.6505132 | 260.7138799 |             |
| 292.2538097 |            |             |             |             |             |
| SMC2        | SMC2       | 8551.010588 | 8090.19993  | 4332.136114 |             |
| 5627.299967 |            |             |             |             |             |
| MIR6895     | MIR6895    | 1.171371313 | 0           | 0           | 0           |
| MIR8087     | MIR8087    | 0           | 0           | 1.885508449 |             |
| MIR6894     | MIR6894    | 18.74194102 | 9.140321286 | 8.92855753  |             |
| 1.885508449 |            |             |             |             |             |
| MIR6893     | MIR6893    | 2.342742627 | 4.062365016 | 0           | 2.828262674 |
| MIR8085     | MIR8085    | 8.199599194 | 9.140321286 | 19.64282657 |             |
| 11.3130507  |            |             |             |             |             |
| MIR6892     | MIR6892    | 42.16936728 | 25.38978135 | 15.1785478  |             |
| 27.33987252 |            |             |             |             |             |
| MIR6891     | MIR6891    | 938.2684221 | 445.8445605 | 838.3915521 |             |
| 1379.249431 |            |             |             |             |             |
| SMAD3       | SMAD3      | 5534.729456 | 1967.200259 | 2324.103525 |             |
| 2922.538097 |            |             |             |             |             |
| FABP7       | FABP7      | 0           | 3.046773762 | 0           | 0           |
| POMGNT1     | POMGNT1    | 3107.648095 | 3921.197832 | 2443.746196 |             |
| 3138.428814 |            |             |             |             |             |
| AMBN        | AMBN       | 1.171371313 | 0           | 0           | 0           |
| ICK         | ICK        | 1231.11125  | 841.9251496 | 630.3561616 |             |

|              |              |             |             |             |             |
|--------------|--------------|-------------|-------------|-------------|-------------|
| 924.8418944  |              |             |             |             |             |
| TMEM216      | TMEM216      | 658.3106782 | 1187.226176 | 2050.889665 |             |
| 1390.562481  |              |             |             |             |             |
| HN1          | HN1          | 13637.10483 | 15487.76662 | 5226.777578 |             |
| 6831.197112  |              |             |             |             |             |
| SLC25A1      | SLC25A1      | 2998.710562 | 3430.667256 | 3647.315751 |             |
| 3291.154998  |              |             |             |             |             |
| ADAMTSL4     | ADAMTSL4     |             | 15.22782708 | 12.18709505 |             |
| 9.821413283  | 2.828262674  |             |             |             |             |
| PMS1         | PMS1         | 1973.760663 | 1768.144373 | 1638.390307 |             |
| 1887.393958  |              |             |             |             |             |
| PCK2         | PCK2         | 3591.424447 | 5123.657877 | 4149.100684 |             |
| 4113.236682  |              |             |             |             |             |
| PSMD9        | PSMD9        | 6130.957455 | 8355.269247 | 4815.171076 |             |
| 4685.488497  |              |             |             |             |             |
| DYNLT1       | DYNLT1       | 3258.754994 | 3188.956538 | 4033.029436 |             |
| 4041.587361  |              |             |             |             |             |
| LINC00933    | LINC00933    |             | 11.71371313 | 23.35859884 |             |
| 16.96425931  | 37.71016899  |             |             |             |             |
| TTN-AS1      | TTN-AS1      | 860.9579154 | 729.1945204 | 1001.784155 |             |
| 968.2085888  |              |             |             |             |             |
| AK2          | AK2          | 15322.70815 | 18581.25758 | 11405.33939 |             |
| 13744.41384  |              |             |             |             |             |
| ZC3HAV1L     | ZC3HAV1L     |             | 429.893272  | 264.0537261 |             |
| 124.9998054  | 195.1501245  |             |             |             |             |
| ACY3         | ACY3         | 36.31251072 | 23.35859884 | 11.60712479 |             |
| 58.45076193  |              |             |             |             |             |
| CDKN2AIPNL   | CDKN2AIPNL   |             | 1689.117434 | 2130.710451 |             |
| 1155.355344  | 1169.015239  |             |             |             |             |
| MSANTD3      | MSANTD3      | 356.0968793 | 466.1563856 | 391.0708198 |             |
| 513.8010525  |              |             |             |             |             |
| CCDC34       | CCDC34       | 565.7723444 | 549.4348684 | 277.6781392 |             |
| 330.9067329  |              |             |             |             |             |
| ATP6V1E2     | ATP6V1E2     |             | 50.36896648 | 34.53010264 |             |
| 103.5712674  | 73.53482953  |             |             |             |             |
| ZNF837       | ZNF837       | 209.6754651 | 280.3031861 | 376.7851278 |             |
| 410.0980878  |              |             |             |             |             |
| EFCAB6-AS1   | EFCAB6-AS1   |             | 0           | 0           | 3.771016899 |
| RNASEH2B-AS1 | RNASEH2B-AS1 |             | 58.56856567 | 47.73278894 |             |
| 49.99992217  | 57.50800771  |             |             |             |             |
| SPATA13-AS1  | SPATA13-AS1  |             | 64.42542224 | 20.31182508 |             |
| 78.57130627  | 101.8174563  |             |             |             |             |
| GPC5-AS1     | GPC5-AS1     |             | 0           | 0           | 4.464278765 |
| PHKG1        | PHKG1        | 851.5869449 | 1300.972396 | 1261.605179 | 0           |
| 811.7113875  |              |             |             |             |             |
| C14orf178    | C14orf178    |             | 250.6734611 | 305.6929675 |             |
| 333.9280516  | 281.8835132  |             |             |             |             |
| MY019        | MY019        | 2791.37784  | 3015.290433 | 2360.710611 |             |
| 2252.239843  |              |             |             |             |             |
| RGPD8        | RGPD8        | 213.1895791 | 253.8978135 | 311.6066578 |             |

|             |          |             |             |             |             |
|-------------|----------|-------------|-------------|-------------|-------------|
| 257.3719033 |          |             |             |             |             |
| AQP1        | AQP1     | 1.171371313 | 0           | 0           | 0           |
| SERPINF2    | SERPINF2 |             | 4.685485254 |             | 3.046773762 |
| 2.678567259 |          | 1.885508449 |             |             |             |
| PSPN        | PSPN     | 9.370970508 | 5.07795627  |             | 3.571423012 |
| 3.771016899 |          |             |             |             |             |
| SERPINB9    | SERPINB9 |             | 2945.998853 |             | 3596.208631 |
| 7028.560488 |          | 6166.555384 |             |             |             |
| OPRL1       | OPRL1    | 16.39919839 | 29.45214637 |             | 15.1785478  |
| 39.59567744 |          |             |             |             |             |
| SGK2        | SGK2     | 2.342742627 | 0           | 0           | 8.484788022 |
| DYNC1I2     | DYNC1I2  | 2155.323217 | 2502.41685  |             | 2364.282034 |
| 2068.402769 |          |             |             |             |             |
| DDX21       | DDX21    | 5355.509645 | 5323.729354 |             | 5519.634265 |
| 5484.001325 |          |             |             |             |             |
| SRD5A1      | SRD5A1   | 814.1030629 | 673.3370014 |             | 256.2496011 |
| 638.2446101 |          |             |             |             |             |
| CMSS1       | CMSS1    | 1246.339078 | 1854.46963  |             | 1443.747753 |
| 1427.329896 |          |             |             |             |             |
| MFSD10      | MFSD10   | 4214.593986 | 4743.826748 |             | 3497.315985 |
| 4462.055746 |          |             |             |             |             |
| ROCK1       | ROCK1    | 6863.064526 | 5938.162062 |             | 6518.739853 |
| 6806.685502 |          |             |             |             |             |
| LY6G6C      | LY6G6C   | 0           | 0           | 1.885508449 |             |
| MDGA1       | MDGA1    | 233.1028914 | 178.7440607 |             | 371.4279933 |
| 263.0284287 |          |             |             |             |             |
| TEX11       | TEX11    | 10.54234182 | 5.07795627  | 0           | 1.885508449 |
| SNRPD3      | SNRPD3   | 7273.044485 | 8045.513915 |             | 6199.990349 |
| 6481.435295 |          |             |             |             |             |
| PRKAR2B     | PRKAR2B  | 38.65525334 | 25.38978135 |             | 135.7140745 |
| 86.73338867 |          |             |             |             |             |
| GPM6A       | GPM6A    | 0           | 0           | 6.249990271 | 0           |
| GPD1        | GPD1     | 4.685485254 | 4.062365016 |             | 19.64282657 |
| 7.542033798 |          |             |             |             |             |
| DNAH6       | DNAH6    | 22.25605496 | 22.34300759 |             | 85.71415229 |
| 25.45436407 |          |             |             |             |             |
| MAX         | MAX      | 6096.987687 | 4543.755271 |             | 7584.809622 |
| 5445.348402 |          |             |             |             |             |
| HOXA9       | HOXA9    | 9.370970508 | 0           | 0           | 9.427542247 |
| REPS1       | REPS1    | 3108.819466 | 3820.654298 |             | 3543.744484 |
| 3488.190631 |          |             |             |             |             |
| WDR43       | WDR43    | 4806.136499 | 5666.999198 |             | 5738.383925 |
| 6417.328008 |          |             |             |             |             |
| CMTM8       | CMTM8    | 192.1048954 | 123.902133  |             | 467.8564146 |
| 503.430756  |          |             |             |             |             |
| ZBTB8A      | ZBTB8A   | 30.45565415 | 24.3741901  | 0           | 12.25580492 |
| LILRB4      | LILRB4   | 1.171371313 | 0           | 18.74997081 | 5.656525348 |
| MRFAP1L1    | MRFAP1L1 |             | 4597.632405 |             | 5585.751897 |
| 7493.738335 |          | 6628.504954 |             |             |             |
| AASDH       | AASDH    | 708.6796446 | 483.4214369 |             | 752.6773998 |

|                 |              |             |             |             |             |
|-----------------|--------------|-------------|-------------|-------------|-------------|
| 838.1085058     |              |             |             |             |             |
| MT1IP MT1IP     | 0            | 2.031182508 | 5.357134518 | 0.942754225 |             |
| LUCAT1 LUCAT1   | 244.8166045  |             | 231.5548059 | 325.8923499 |             |
| 136.6993626     |              |             |             |             |             |
| LOC100129940    | LOC100129940 | 0           | 0           | 0           | 12.25580492 |
| GPATCH2L        | GPATCH2L     |             | 1680.917835 | 1450.264311 |             |
| 1719.64018      |              |             | 1809.145357 |             |             |
| CSPG4 CSPG4     | 0            | 2.031182508 | 0           | 1.885508449 |             |
| HIST1H4F        | HIST1H4F     |             | 49.19759517 | 26.40537261 |             |
| 41.07136464     |              |             | 14.14131337 |             |             |
| HIST1H4D        | HIST1H4D     |             | 39.82662466 | 29.45214637 |             |
| 12.49998054     |              |             | 11.3130507  |             |             |
| POFUT1 POFUT1   | 3152.160205  |             | 3143.254931 | 3111.602299 |             |
| 3123.344746     |              |             |             |             |             |
| MDP1 MDP1       | 912.4982532  |             | 799.2703169 | 808.9273122 |             |
| 832.4519804     |              |             |             |             |             |
| PNP PNP         | 5588.612537  |             | 7193.432852 | 4308.921864 |             |
| 4651.549345     |              |             |             |             |             |
| ENPEP ENPEP     | 5.856856567  |             | 25.38978135 | 43.7499319  |             |
| 39.59567744     |              |             |             |             |             |
| MAP7 MAP7       | 132.3649584  |             | 161.4790094 | 203.5711117 |             |
| 76.3630922      |              |             |             |             |             |
| BCLAF1 BCLAF1   | 10506.02931  |             | 11868.19939 | 11890.16006 |             |
| 11806.11116     |              |             |             |             |             |
| SP140 SP140     | 3419.232864  |             | 3163.566756 | 2706.245787 |             |
| 3157.283899     |              |             |             |             |             |
| MPHOSPH6        | MPHOSPH6     |             | 1937.448152 | 2229.222803 |             |
| 1580.354683     |              |             | 1533.861124 |             |             |
| PSME3 PSME3     | 14633.94182  |             | 17064.97984 | 10804.44747 |             |
| 12017.2881      |              |             |             |             |             |
| KCNJ9 KCNJ9     | 8.199599194  | 0           | 0           | 3.771016899 |             |
| RAD51B RAD51B   | 481.4336098  |             | 601.2300224 | 598.2133545 |             |
| 543.0264334     |              |             |             |             |             |
| HLA-B HLA-B     | 101424.3565  |             | 60330.18286 | 86149.8659  |             |
| 159427.2814     |              |             |             |             |             |
| RANBP9 RANBP9   | 2423.567248  |             | 1509.168604 | 1134.819662 |             |
| 1262.347907     |              |             |             |             |             |
| SMC1A SMC1A     | 14229.81872  |             | 18854.45163 | 11707.12463 |             |
| 11427.12396     |              |             |             |             |             |
| RAPGEF1 RAPGEF1 | 8100.032633  |             | 3372.778555 | 2342.853496 |             |
| 4210.340368     |              |             |             |             |             |
| SCUBE3 SCUBE3   | 7.028227881  |             | 2.031182508 | 1.785711506 |             |
| 9.427542247     |              |             |             |             |             |
| ZPBP2 ZPBP2     | 28.11291152  |             | 16.24946006 | 66.07132572 |             |
| 26.39711829     |              |             |             |             |             |
| SYVN1 SYVN1     | 1260.395533  |             | 775.9117181 | 1046.426943 |             |
| 912.5860895     |              |             |             |             |             |
| ATG9B ATG9B     | 483.7763525  |             | 1031.840714 | 1076.784038 |             |
| 555.2822384     |              |             |             |             |             |
| PNPLA1 PNPLA1   | 0            | 1.015591254 | 4.464278765 | 0           |             |

|              |              |             |             |             |
|--------------|--------------|-------------|-------------|-------------|
| KRBA1        | KRBA1        | 60.9113083  | 21.32741634 | 128.5712284 |
| 86.73338867  |              |             |             |             |
| HPS4         | HPS4         | 2135.409904 | 1858.531995 | 2712.495778 |
| 2332.373952  |              |             |             |             |
| OPTN         | OPTN         | 9559.561289 | 11853.98112 | 8860.700493 |
| 8285.866881  |              |             |             |             |
| ARPC1B       | ARPC1B       | 57455.76293 | 73342.95359 | 24550.85464 |
| 36121.62812  |              |             |             |             |
| MT1H         | MT1H         | 12.88508445 | 24.3741901  | 4.464278765 |
| 9.427542247  |              |             |             |             |
| CDC123       | CDC123       | 11282.64849 | 15972.20365 | 8091.95169  |
| 9207.880513  |              |             |             |             |
| BTG1         | BTG1         | 7419.465899 | 8917.906802 | 30582.09525 |
| 26342.43855  |              |             |             |             |
| SSR4         | SSR4         | 5460.933063 | 5907.694325 | 6045.526304 |
| 5763.99933   |              |             |             |             |
| SAP30L-AS1   | SAP30L-AS1   |             | 141.7359289 | 160.4634181 |
| 254.4638896  | 138.584871   |             |             |             |
| ZNF625       | ZNF625       | 58.56856567 | 79.21611782 | 41.96422039 |
| 90.50440557  |              |             |             |             |
| LOC100506023 | LOC100506023 |             | 133.5363297 | 124.9177242 |
| 153.5711895  | 172.5240231  |             |             |             |
| ZNF124       | ZNF124       | 490.8045803 | 468.1875681 | 622.3204599 |
| 716.4932108  |              |             |             |             |
| CTSH         | CTSH         | 9906.287198 | 9832.954522 | 2296.424997 |
| 8457.44815   |              |             |             |             |
| NCAN         | NCAN         | 5.856856567 | 14.21827756 | 51.78563368 |
| 54.67974503  |              |             |             |             |
| ZFR2         | ZFR2         | 7.028227881 | 7.109138778 | 67.85703723 |
| 34.88190631  |              |             |             |             |
| PPP3CC       | PPP3CC       | 4530.86424  | 5674.108336 | 4828.563912 |
| 4130.206258  |              |             |             |             |
| ATG16L1      | ATG16L1      | 2532.50478  | 2615.147479 | 2687.495817 |
| 2310.690605  |              |             |             |             |
| RALGAPA2     | RALGAPA2     |             | 972.2381902 | 564.6687373 |
| 792.8559087  | 1059.655749  |             |             |             |
| C9orf116     | C9orf116     |             | 4.685485254 | 3.046773762 |
| 16.07140355  | 2.828262674  |             |             |             |
| ALS2CL       | ALS2CL       | 25.7701689  | 9.140321286 | 258.0353126 |
| 233.8030477  |              |             |             |             |
| CYP3A5       | CYP3A5       | 30.45565415 | 12.18709505 | 45.5356434  |
| 46.19495701  |              |             |             |             |
| CLSPN        | CLSPN        | 3612.509131 | 3613.473682 | 1291.962275 |
| 1894.935992  |              |             |             |             |
| OBSL1        | OBSL1        | 2.342742627 | 1.015591254 | 23.21424958 |
| 2.828262674  |              |             |             |             |
| TMEM135      | TMEM135      | 1035.492241 | 971.9208301 | 610.7133351 |
| 928.6129113  |              |             |             |             |
| SRD5A2       | SRD5A2       | 1.171371313 | 0           | 0           |
| HTR1F        | HTR1F        | 0           | 1.015591254 | 0           |

|              |              |             |             |             |
|--------------|--------------|-------------|-------------|-------------|
| CNKS2        | CNKS2        | 330.3267104 | 338.1918876 | 744.641698  |
| 559.9960095  |              |             |             |             |
| ATP5SL       | ATP5SL       | 3455.545375 | 4716.405784 | 3062.495233 |
| 2994.187418  |              |             |             |             |
| SEMA4A       | SEMA4A       | 721.5647291 | 1460.420223 | 1079.462605 |
| 602.4199496  |              |             |             |             |
| RPL37A       | RPL37A       | 9454.137871 | 7200.541991 | 8462.486827 |
| 8743.10268   |              |             |             |             |
| CWC27        | CWC27        | 1864.823131 | 2398.826542 | 1636.604595 |
| 1949.615737  |              |             |             |             |
| CHD8         | CHD8         | 4197.023416 | 2454.684061 | 3008.031032 |
| 2139.109336  |              |             |             |             |
| LOC100129046 | LOC100129046 |             | 5.856856567 | 14.21827756 |
| 10.71426904  | 4.713771124  |             |             |             |
| TOPORS-AS1   | TOPORS-AS1   |             | 638.3973658 | 596.1520661 |
| 751.7845441  | 723.0924904  |             |             |             |
| LINC00535    | LINC00535    |             | 0           | 2.828262674 |
| MIR497HG     | MIR497HG     |             | 7978.210016 | 10394.57649 |
| 5646.419782  | 5244.541752  |             |             |             |
| RAB11B-AS1   | RAB11B-AS1   |             | 686.4235897 | 673.3370014 |
| 585.713374   | 576.0228313  |             |             |             |
| GDAP1L1      | GDAP1L1      | 0           | 0           | 0.942754225 |
| TSC22D3      | TSC22D3      | 1158.486229 | 1543.698706 | 7171.417408 |
| 4308.386807  |              |             |             |             |
| TPTE2P5      | TPTE2P5      | 276.44363   | 370.6908077 | 372.320849  |
| 309.2233857  |              |             |             |             |
| CLCN5        | CLCN5        | 223.7319209 | 221.3988934 | 178.5711506 |
| 230.0320308  |              |             |             |             |
| SLC6A3       | SLC6A3       | 1.171371313 | 0           | 0           |
| TBC1D10B     | TBC1D10B     |             | 3140.446491 | 1686.897073 |
| 1374.105004  | 1449.013243  |             |             |             |
| SARM1        | SARM1        | 1125.687832 | 987.1546989 | 919.6414256 |
| 1054.941977  |              |             |             |             |
| NRG2         | NRG2         | 1.171371313 | 4.062365016 | 17.85711506 |
| 2.828262674  |              |             |             |             |
| RBM38        | RBM38        | 12743.34852 | 21129.37604 | 16013.36793 |
| 12153.04471  |              |             |             |             |
| FBX025       | FBX025       | 1287.337073 | 1516.277742 | 1442.854897 |
| 1475.410362  |              |             |             |             |
| PPP3CB       | PPP3CB       | 1221.74028  | 706.8515128 | 416.0707809 |
| 611.8474918  |              |             |             |             |
| B3GNTL1      | B3GNTL1      | 470.891268  | 440.7666043 | 483.0349624 |
| 547.7402046  |              |             |             |             |
| OXSM         | OXSM         | 1099.917663 | 1255.27079  | 1017.855558 |
| 1044.571681  |              |             |             |             |
| WDR13        | WDR13        | 1801.56908  | 2417.107185 | 1645.533153 |
| 1483.89515   |              |             |             |             |
| NRXN2        | NRXN2        | 2.342742627 | 0           | 0           |
| RBM48        | RBM48        | 1283.82296  | 1447.217537 | 2213.389412 |
| 2025.036075  |              |             |             |             |

|             |        |             |             |             |
|-------------|--------|-------------|-------------|-------------|
| WDR54       | WDR54  | 3189.644087 | 3503.789826 | 2010.711156 |
| 2394.595731 |        |             |             |             |
| WDR74       | WDR74  | 2455.194273 | 3780.030648 | 5420.527277 |
| 3435.396395 |        |             |             |             |
| EPHX2       | EPHX2  | 322.1271112 | 481.3902544 | 1346.426476 |
| 1183.156552 |        |             |             |             |
| KLC4        | KLC4   | 415.8368163 | 389.9870416 | 1166.962469 |
| 609.0192292 |        |             |             |             |
| ABHD3       | ABHD3  | 4362.186771 | 4863.666516 | 3000.888186 |
| 2943.27869  |        |             |             |             |
| POLR3H      | POLR3H | 7207.447692 | 10374.26466 | 7036.59619  |
| 6718.066605 |        |             |             |             |
| JOSD2       | JOSD2  | 849.2442023 | 979.0299689 | 557.1419899 |
| 607.1337207 |        |             |             |             |
| ZNF675      | ZNF675 | 1039.006355 | 904.8918074 | 2124.996692 |
| 1545.174174 |        |             |             |             |
| RHBDL3      | RHBDL3 | 3.51411394  | 4.062365016 | 3.571423012 |
| 15.0840676  |        |             |             |             |
| COX14       | COX14  | 2883.916174 | 3793.233334 | 4288.386182 |
| 2888.598945 |        |             |             |             |
| MFSD5       | MFSD5  | 4119.712909 | 6125.030853 | 4342.850383 |
| 3723.879188 |        |             |             |             |
| RNF25       | RNF25  | 1422.044775 | 1839.235761 | 1691.961652 |
| 1518.777056 |        |             |             |             |
| DEFA5       | DEFA5  | 0           | 1.785711506 | 0           |
| TIGD5       | TIGD5  | 100.737933  | 51.79515396 | 44.64278765 |
| 80.1341091  |        |             |             |             |
| ACOX1       | ACOX1  | 2854.631891 | 2966.542053 | 2516.960368 |
| 2139.109336 |        |             |             |             |
| NMD3        | NMD3   | 3147.474719 | 3917.135467 | 3321.423401 |
| 3726.70745  |        |             |             |             |
| PPP6R3      | PPP6R3 | 6906.405264 | 5558.330933 | 4677.67129  |
| 5706.491322 |        |             |             |             |
| SUSD2       | SUSD2  | 2.342742627 | 0           | 24.10710533 |
| SPRYD7      | SPRYD7 | 432.2360147 | 713.9606516 | 679.4632281 |
| 455.3502905 |        |             |             |             |
| EEF2        | EEF2   | 16405.05525 | 12250.06171 | 10643.73343 |
| 10990.62875 |        |             |             |             |
| INTS8       | INTS8  | 5231.344286 | 5434.4288   | 4540.171504 |
| 4894.779935 |        |             |             |             |
| GNPDA2      | GNPDA2 | 1116.316862 | 999.341794  | 1330.355072 |
| 1317.970406 |        |             |             |             |
| PNOC        | PNOC   | 0           | 3.571423012 | 0           |
| ECHDC3      | ECHDC3 | 15.22782708 | 60.93547524 | 205.3568232 |
| 107.4739816 |        |             |             |             |
| TGS1        | TGS1   | 1837.881591 | 1812.830388 | 1808.925756 |
| 2305.976834 |        |             |             |             |
| CST11       | CST11  | 0           | 1.785711506 | 0           |
| TLCD1       | TLCD1  | 154.6210134 | 262.0225435 | 349.9994552 |
| 318.650928  |        |             |             |             |



|             |             |             |             |             |             |
|-------------|-------------|-------------|-------------|-------------|-------------|
| BEGAIN      | BEGAIN      | 28.11291152 | 19.29623383 | 47.32135491 |             |
| 49.02321969 |             |             |             |             |             |
| PPIP5K1     | PPIP5K1     | 893.7563122 | 851.0654709 | 785.7130627 |             |
| 995.5484613 |             |             |             |             |             |
| WDR27       | WDR27       | 140.5645576 | 118.8241767 | 238.3924861 |             |
| 213.0624548 |             |             |             |             |             |
| ZNF177      | ZNF177      | 26.94154021 | 23.35859884 | 226.7853613 |             |
| 114.0732612 |             |             |             |             |             |
| IQCJ-SCHIP1 | IQCJ-SCHIP1 |             | 11.71371313 | 2.031182508 | 0           |
| 2.828262674 |             |             |             |             |             |
| SCAMP5      | SCAMP5      | 3.51411394  | 4.062365016 | 0           | 0           |
| HCFC1R1     | HCFC1R1     | 1471.24237  | 1607.680955 | 864.2843689 |             |
| 966.3230803 |             |             |             |             |             |
| EHBP1       | EHBP1       | 705.1655307 | 698.7267828 | 619.6418926 |             |
| 813.5968959 |             |             |             |             |             |
| KLKB1       | KLKB1       | 5.856856567 | 0           | 23.21424958 | 9.427542247 |
| NOX01       | NOX01       | 48.02622385 | 26.40537261 | 23.21424958 |             |
| 15.0840676  |             |             |             |             |             |
| ECHS1       | ECHS1       | 5173.947092 | 8058.716601 | 5308.027452 |             |
| 4972.085781 |             |             |             |             |             |
| SOX10       | SOX10       | 1.171371313 | 1.015591254 | 0           | 0.942754225 |
| SUM02       | SUM02       | 13791.72584 | 14290.38454 | 13737.47862 |             |
| 13207.98669 |             |             |             |             |             |
| CORT        | CORT        | 79.65324932 | 97.49676039 | 75.89273901 |             |
| 37.71016899 |             |             |             |             |             |
| FAM210B     | FAM210B     | 370.1533351 | 276.2408211 | 1122.319682 |             |
| 1197.297865 |             |             |             |             |             |
| MYL9        | MYL9        | 29.28428284 | 4.062365016 | 1.785711506 |             |
| 7.542033798 |             |             |             |             |             |
| PLTP        | PLTP        | 1119.830976 | 1431.983668 | 1343.747908 |             |
| 1306.657355 |             |             |             |             |             |
| TRIP12      | TRIP12      | 16565.53311 | 8977.826686 | 7904.451982 |             |
| 9243.705173 |             |             |             |             |             |
| PIGF        | PIGF        | 1422.044775 | 1593.462678 | 866.9629362 |             |
| 1055.884732 |             |             |             |             |             |
| IFNLR1      | IFNLR1      | 178.0484396 | 135.0736368 | 172.3211603 |             |
| 174.4095316 |             |             |             |             |             |
| SHISA4      | SHISA4      | 29.28428284 | 34.53010264 | 20.53568232 |             |
| 16.02682182 |             |             |             |             |             |
| ABHD15      | ABHD15      | 1313.107242 | 672.3214102 | 616.9633253 |             |
| 1010.632529 |             |             |             |             |             |
| CATSPER4    | CATSPER4    |             | 4.685485254 | 0           | 0           |
| PSIP1       | PSIP1       | 5089.608357 | 4981.475101 | 9202.664246 | 0           |
| 8748.759205 |             |             |             |             |             |
| MEGF9       | MEGF9       | 1049.548697 | 573.8090585 | 862.4986574 |             |
| 739.1193122 |             |             |             |             |             |
| TMEM150C    | TMEM150C    |             | 12.88508445 | 2.031182508 | 0           |
| 12.25580492 |             |             |             |             |             |
| HSPE1       | HSPE1       | 10012.88199 | 11127.83337 | 10554.44786 |             |
| 10141.2072  |             |             |             |             |             |

|             |            |             |             |             |             |
|-------------|------------|-------------|-------------|-------------|-------------|
| RNF38       | RNF38      | 3023.30936  | 2091.102392 | 3402.673275 |             |
| 3263.815126 |            |             |             |             |             |
| IL27        | IL27       | 1.171371313 | 4.062365016 | 17.85711506 | 0           |
| CDKN2B-AS1  | CDKN2B-AS1 |             | 80.82462063 | 157.4166444 |             |
| 49.10706642 |            | 20.74059294 |             |             |             |
| SCAF8       | SCAF8      | 2386.083366 | 1458.389041 | 2294.639285 |             |
| 2487.928399 |            |             |             |             |             |
| IDH3G       | IDH3G      | 4788.565929 | 6459.160376 | 3626.780069 |             |
| 4243.336765 |            |             |             |             |             |
| 3-Sep       | 3-Sep      | 89.02421982 | 86.32525659 | 9.821413283 |             |
| 10.37029647 |            |             |             |             |             |
| DNMT3B      | DNMT3B     | 155.7923847 | 134.0580455 | 29.46423985 |             |
| 93.33266825 |            |             |             |             |             |
| MYZAP       | MYZAP      | 4.685485254 | 6.093547524 | 83.03558503 |             |
| 20.74059294 |            |             |             |             |             |
| SPDEF       | SPDEF      | 0           | 3.046773762 | 0           |             |
| MRPL35      | MRPL35     | 4378.58597  | 5006.864882 | 2858.924121 |             |
| 3837.952449 |            |             |             |             |             |
| KANSL3      | KANSL3     | 5369.566101 | 4757.029434 | 3445.530351 |             |
| 3701.253086 |            |             |             |             |             |
| ATP6V1G3    | ATP6V1G3   |             | 2.342742627 | 1.015591254 |             |
| 5.357134518 |            | 2.828262674 |             |             |             |
| PHF10       | PHF10      | 1705.516632 | 1742.754592 | 1983.925483 |             |
| 1943.016457 |            |             |             |             |             |
| COMMD1      | COMMD1     | 1752.371485 | 2196.723883 | 1266.962314 |             |
| 1415.074091 |            |             |             |             |             |
| MEI1        | MEI1       | 1789.855367 | 2973.651192 | 1923.211292 |             |
| 1834.599721 |            |             |             |             |             |
| WDR90       | WDR90      | 1007.37933  | 478.3434807 | 377.6779835 |             |
| 511.915544  |            |             |             |             |             |
| TTY10       | TTY10      | 12.88508445 | 0           | 22.62610139 |             |
| FIZ1        | FIZ1       | 636.0546232 | 517.9515396 | 589.284797  |             |
| 389.3574948 |            |             |             |             |             |
| BOLA2       | BOLA2      | 576.3146862 | 444.8289693 | 258.9281684 |             |
| 455.3502905 |            |             |             |             |             |
| EPSTI1      | EPSTI1     | 3135.761006 | 3710.970442 | 7592.845324 |             |
| 5648.983314 |            |             |             |             |             |
| L1CAM       | L1CAM      | 182.7339249 | 170.6193307 | 58.9284797  |             |
| 43.36669434 |            |             |             |             |             |
| TGM1        | TGM1       | 5.856856567 | 31.48332888 | 46.42849916 |             |
| 47.13771124 |            |             |             |             |             |
| CSTF1       | CSTF1      | 4568.348122 | 5297.323981 | 3484.816004 |             |
| 3629.603765 |            |             |             |             |             |
| PTGER2      | PTGER2     | 3047.908158 | 5954.411522 | 2601.781664 |             |
| 1917.562093 |            |             |             |             |             |
| PTGER1      | PTGER1     | 5.856856567 | 8.124730032 | 0           | 13.19855915 |
| TXN         | TXN        | 21288.50225 | 28448.74221 | 19935.68325 |             |
| 15844.87025 |            |             |             |             |             |
| TNFRSF4     | TNFRSF4    | 10545.85594 | 12778.16916 | 6331.240145 |             |
| 10988.74324 |            |             |             |             |             |

|             |         |             |                     |             |
|-------------|---------|-------------|---------------------|-------------|
| SPN         | SPN     | 11677.40062 | 11151.19197         | 4054.457975 |
| 5549.994121 |         |             |                     |             |
| SESN1       | SESN1   | 1412.673804 | 2275.94 4808.921086 | 3338.29271  |
| SIAE        | SIAE    | 619.6554248 | 483.4214369         | 465.1778473 |
| 603.3627038 |         |             |                     |             |
| HMGCS2      | HMGCS2  | 0           | 7.109138778         | 0           |
| HLA-E       | HLA-E   | 3.51411394  | 4.062365016         | 0.892855753 |
| 14.14131337 |         |             |                     |             |
| GAS8        | GAS8    | 85.51010588 | 118.8241767         | 466.9635588 |
| 497.7742306 |         |             |                     |             |
| KXD1        | KXD1    | 6271.522012 | 7947.001563         | 4585.707148 |
| 4761.851589 |         |             |                     |             |
| OTULIN      | OTULIN  | 3706.218836 | 4307.122508         | 3708.029942 |
| 3178.967246 |         |             |                     |             |
| DIS3L       | DIS3L   | 2742.180245 | 3338.248452         | 2252.675065 |
| 3012.099748 |         |             |                     |             |
| ST6GAL1     | ST6GAL1 | 9058.214367 | 7797.709649         | 11686.58895 |
| 12163.41501 |         |             |                     |             |
| INTS12      | INTS12  | 1417.359289 | 1680.803525         | 1410.71209  |
| 1408.474812 |         |             |                     |             |
| ZNF695      | ZNF695  | 64.42542224 | 23.35859884         | 1.785711506 |
| 16.02682182 |         |             |                     |             |
| CTDSPL      | CTDSPL  | 36.31251072 | 19.29623383         | 2.678567259 |
| 35.82466054 |         |             |                     |             |
| NUTF2       | NUTF2   | 8862.595358 | 10212.78565         | 5827.6695   |
| 6439.011355 |         |             |                     |             |
| TCEB2       | TCEB2   | 8282.766557 | 9531.323919         | 6552.668371 |
| 5916.725514 |         |             |                     |             |
| CLTB        | CLTB    | 4758.110275 | 6640.95121          | 3924.101035 |
| 3345.834744 |         |             |                     |             |
| CDCP1       | CDCP1   | 28.11291152 | 124.9177242         | 212.4996692 |
| 22.62610139 |         |             |                     |             |
| MPZL3       | MPZL3   | 3892.466875 | 3605.348952         | 3069.638079 |
| 3472.16381  |         |             |                     |             |
| CLPX        | CLPX    | 2045.214313 | 2175.396466         | 2233.925094 |
| 2375.740646 |         |             |                     |             |
| FAM216A     | FAM216A | 794.1897505 | 838.8783758         | 792.8559087 |
| 773.0584643 |         |             |                     |             |
| DNAJB6      | DNAJB6  | 8249.968161 | 9803.502375         | 9959.805925 |
| 8991.047041 |         |             |                     |             |
| CCDC71      | CCDC71  | 60.9113083  | 14.21827756         | 52.67848943 |
| 16.02682182 |         |             |                     |             |
| WBSCR22     | WBSCR22 | 4077.543542 | 6143.311496         | 6635.703957 |
| 4961.715485 |         |             |                     |             |
| LRRC19      | LRRC19  | 10.54234182 | 3.046773762         | 0           |
| CASD1       | CASD1   | 1313.107242 | 843.9563321         | 16.02682182 |
| 1399.047269 |         |             |                     | 1119.641114 |
| SIRT3       | SIRT3   | 992.1515025 | 1015.591254         | 1332.140784 |
| 1117.163756 |         |             |                     |             |
| RNF141      | RNF141  | 1160.828972 | 1023.715984         | 1366.069302 |

|              |              |             |             |             |
|--------------|--------------|-------------|-------------|-------------|
| 1500.864726  |              |             |             |             |
| ZNF623       | ZNF623       | 584.5142854 | 527.0918609 | 1124.105393 |
| 1144.503629  |              |             |             |             |
| PRAF2        | PRAF2        | 1301.393529 | 1469.560545 | 1308.033678 |
| 1286.859517  |              |             |             |             |
| RNF2         | RNF2         | 1194.79874  | 1457.37345  | 1909.818456 |
| 1485.780658  |              |             |             |             |
| CLASRP       | CLASRP       | 856.2724301 | 405.2209104 | 653.5704112 |
| 590.1641447  |              |             |             |             |
| ADRA1A       | ADRA1A       | 0           | 0           | 1.785711506 |
| MTMR10       | MTMR10       | 1350.591124 | 856.1434272 | 0           |
| 1342.482016  |              |             |             | 1446.42632  |
| MIA2         | MIA2         | 2.342742627 | 3.046773762 | 0           |
| DBN1         | DBN1         | 347.8972801 | 598.1832486 | 17.91233027 |
| 365.7886392  |              |             |             | 925.8914159 |
| RAB40A       | RAB40A       | 7.028227881 | 2.031182508 | 5.357134518 |
| 6.599279573  |              |             |             |             |
| PSAT1        | PSAT1        | 6487.054334 | 8549.247177 | 8633.022276 |
| 7360.082232  |              |             |             |             |
| ANGPTL7      | ANGPTL7      | 2.342742627 | 0           | 0           |
| CCNYL1       | CCNYL1       | 277.6150013 | 119.839768  | 0           |
| 182.8943196  |              |             |             | 390.1779641 |
| KNSTRN       | KNSTRN       | 2909.686343 | 3365.669416 | 1156.2482   |
| 1872.30989   |              |             |             |             |
| ZNF610       | ZNF610       | 101.9093043 | 88.3564391  | 551.7848554 |
| 290.3683012  |              |             |             |             |
| NDFIP2       | NDFIP2       | 5735.033951 | 8967.670773 | 4169.636367 |
| 6590.794785  |              |             |             |             |
| TOMM34       | TOMM34       | 4908.045803 | 7574.279573 | 4554.457196 |
| 4687.374005  |              |             |             |             |
| LOC101929613 | LOC101929613 |             | 0           | 0           |
| GMPR         | GMPR         | 163.9919839 | 499.670897  | 0           |
| 81.07686333  |              |             |             | 0.942754225 |
| PRKD2        | PRKD2        | 4542.577954 | 5574.580393 | 201.7854002 |
| 3875.662618  |              |             |             |             |
| INPP4B       | INPP4B       | 2954.198453 | 1829.079849 | 5372.313066 |
| 4660.034133  |              |             |             |             |
| ATG9A        | ATG9A        | 5640.152874 | 5994.019581 | 3857.136853 |
| 4618.552947  |              |             |             |             |
| NR3C2        | NR3C2        | 14.05645576 | 15.23386881 | 4400.886007 |
| 274.3414794  |              |             |             |             |
| KCNJ2        | KCNJ2        | 5.856856567 | 3.046773762 | 211.6068135 |
| MGP          | MGP          | 1.171371313 | 3.046773762 | 0           |
| 11.3130507   |              |             |             | 25.45436407 |
| RPL39        | RPL39        | 4090.428627 | 3631.754324 | 28.5713841  |
| 4924.94807   |              |             |             |             |
| NAPG         | NAPG         | 2211.54904  | 2532.884588 | 5788.383847 |
| 2038.234634  |              |             |             |             |
| MED26        | MED26        | 867.9861433 | 482.4058457 | 1884.818495 |
| 477.0336377  |              |             |             |             |
|              |              |             |             | 572.3205377 |

|              |              |             |             |             |
|--------------|--------------|-------------|-------------|-------------|
| PHPT1        | PHPT1        | 4686.656625 | 8345.113335 | 5002.670784 |
| 3310.952837  |              |             |             |             |
| ACTG1        | ACTG1        | 285194.9451 | 377508.4718 | 131812.2948 |
| 198180.1366  |              |             |             |             |
| NPPA-AS1     | NPPA-AS1     | 46.85485254 | 33.51451138 |             |
| 174.9997276  | 119.7297865  |             |             |             |
| ZNF321P      | ZNF321P      | 105.4234182 | 93.43439537 | 200.8925444 |
| 156.4972013  |              |             |             |             |
| PRKCQ-AS1    | PRKCQ-AS1    | 2042.871571 | 1978.371763 |             |
| 2928.56687   | 2569.948017  |             |             |             |
| ZNF625-ZNF20 | ZNF625-ZNF20 | 279.9577439 | 393.0338153 |             |
| 516.963481   | 455.3502905  |             |             |             |
| RNASEK       | RNASEK       | 10510.7148  | 11362.43495 | 9482.128097 |
| 7595.770789  |              |             |             |             |
| RAB4B-EGLN2  | RAB4B-EGLN2  | 8876.651813 | 9907.092683 |             |
| 10008.02014  | 8112.400104  |             |             |             |
| AKAP8        | AKAP8        | 3399.319552 | 3154.426435 | 2559.817444 |
| 2999.843943  |              |             |             |             |
| GJB7         | GJB7         | 3.51411394  | 2.031182508 | 16.07140355 |
| 4.713771124  |              |             |             |             |
| C3orf62      | C3orf62      | 160.4778699 | 106.6370817 | 166.0711701 |
| 143.2986422  |              |             |             |             |
| DOK6         | DOK6         | 607.9417117 | 62.96665775 | 39.28565313 |
| 578.851094   |              |             |             |             |
| WDR5         | WDR5         | 3828.041452 | 4004.476315 | 2658.031577 |
| 3215.734661  |              |             |             |             |
| STAT3        | STAT3        | 17219.15831 | 14423.42699 | 25783.88844 |
| 27384.18197  |              |             |             |             |
| CEPT1        | CEPT1        | 2046.385685 | 1698.068577 | 2546.424608 |
| 2756.613353  |              |             |             |             |
| RUNX1        | RUNX1        | 1424.387517 | 794.1923607 | 1176.783882 |
| 1802.546078  |              |             |             |             |
| RPH3A        | RPH3A        | 0           | 8.035701777 | 0           |
| ARL13B       | ARL13B       | 573.9719436 | 577.8714236 | 608.9276236 |
| 494.0032138  |              |             |             |             |
| HK2          | HK2          | 1923.391697 | 2276.955592 | 1599.997509 |
| 2143.823107  |              |             |             |             |
| GAA          | GAA          | 1300.222158 | 1501.043873 | 1233.033795 |
| 1355.680575  |              |             |             |             |
| ZNF268       | ZNF268       | 1776.970283 | 2105.32067  | 2903.566909 |
| 2555.806703  |              |             |             |             |
| IRF6         | IRF6         | 21.08468364 | 10.15591254 | 29.46423985 |
| 21.68334717  |              |             |             |             |
| ABCA2        | ABCA2        | 800.0466071 | 81.24730032 | 136.6069302 |
| 386.5292321  |              |             |             |             |
| YIPF7        | YIPF7        | 0           | 2.031182508 | 2.678567259 |
| 0            | 0            |             |             |             |
| RASAL3       | RASAL3       | 18174.9973  | 17481.37226 | 9902.663157 |
| 11629.81612  |              |             |             |             |
| UXS1         | UXS1         | 4132.597994 | 5884.335726 | 3511.601677 |
| 3517.416012  |              |             |             |             |

|              |              |             |             |             |   |
|--------------|--------------|-------------|-------------|-------------|---|
| NLRP7        | NLRP7        | 5.856856567 | 5.07795627  | 0           | 0 |
| HPRT1        | HPRT1        | 7712.308728 | 7420.925293 | 3913.386766 |   |
| 5477.402046  |              |             |             |             |   |
| TXLNA        | TXLNA        | 12094.40881 | 11633.59782 | 7640.166679 |   |
| 9380.404536  |              |             |             |             |   |
| RCE1         | RCE1         | 1482.956083 | 1920.483061 | 1773.211526 |   |
| 1875.138153  |              |             |             |             |   |
| DOPEY2       | DOPEY2       | 1036.663612 | 827.7068721 | 945.5342425 |   |
| 605.2482123  |              |             |             |             |   |
| WDR70        | WDR70        | 1658.66178  | 2005.792727 | 1523.211915 |   |
| 1837.427984  |              |             |             |             |   |
| UBAP1L       | UBAP1L       | 7.028227881 | 3.046773762 | 37.49994163 |   |
| 22.62610139  |              |             |             |             |   |
| COX5B        | COX5B        | 9326.458398 | 11242.59518 | 7213.381629 |   |
| 6974.495754  |              |             |             |             |   |
| GALC         | GALC         | 1911.677984 | 1342.611638 | 1135.712518 |   |
| 1811.97362   |              |             |             |             |   |
| TYMS         | TYMS         | 20163.98579 | 20028.47512 | 7875.880597 |   |
| 11057.5643   |              |             |             |             |   |
| TUBG1        | TUBG1        | 7312.87111  | 11616.33276 | 5670.526887 |   |
| 5500.970901  |              |             |             |             |   |
| CCDC68       | CCDC68       | 5.856856567 | 1.015591254 | 5.357134518 |   |
| 5.656525348  |              |             |             |             |   |
| CLDN12       | CLDN12       | 114.7943887 | 112.7306292 | 164.2854586 |   |
| 100.874702   |              |             |             |             |   |
| TGFBR1       | TGFBR1       | 1912.849355 | 2709.597466 | 2600.888809 |   |
| 2079.71582   |              |             |             |             |   |
| CLCF1        | CLCF1        | 31.62702546 | 26.40537261 | 115.1783921 |   |
| 66.93554995  |              |             |             |             |   |
| PRSS55       | PRSS55       | 0           | 0           | 8.484788022 |   |
| RAB29        | RAB29        | 4571.862236 | 5799.026061 | 4070.529378 |   |
| 4391.349179  |              |             |             |             |   |
| CPEB2        | CPEB2        | 467.3771541 | 288.4279162 | 382.1422623 |   |
| 382.7582152  |              |             |             |             |   |
| FIRRE        | FIRRE        | 78.481878   | 76.16934405 | 58.03562395 |   |
| 134.8138541  |              |             |             |             |   |
| ZSCAN32      | ZSCAN32      | 1248.68182  | 1446.201946 | 1979.461204 |   |
| 1736.553282  |              |             |             |             |   |
| HAUS1        | HAUS1        | 2948.341596 | 3427.620482 | 2002.675454 |   |
| 2305.976834  |              |             |             |             |   |
| TMEM161B     | TMEM161B     |             | 921.8692237 | 807.395047  |   |
| 1029.462683  | 1070.968799  |             |             |             |   |
| LOC101928103 | LOC101928103 |             | 33.96976809 | 47.73278894 |   |
| 24.99996108  | 14.14131337  |             |             |             |   |
| UBE2L6       | UBE2L6       | 13370.03217 | 19511.53917 | 25134.7823  |   |
| 18547.74662  |              |             |             |             |   |
| KCTD13       | KCTD13       | 652.4538216 | 783.0208569 | 866.9629362 |   |
| 1007.804266  |              |             |             |             |   |
| C14orf159    | C14orf159    |             | 3908.866073 | 3742.453771 |   |
| 3637.494338  | 3832.295923  |             |             |             |   |

|             |             |             |             |             |             |
|-------------|-------------|-------------|-------------|-------------|-------------|
| TPRG1L      | TPRG1L      | 880.8712277 | 555.528416  | 1666.961691 |             |
| 1063.426765 |             |             |             |             |             |
| NANP        | NANP        | 617.3126822 | 633.7289425 | 648.2132767 |             |
| 608.0764749 |             |             |             |             |             |
| ZNF12       | ZNF12       | 2350.942226 | 1869.703499 | 3285.709171 |             |
| 3416.54131  |             |             |             |             |             |
| IKZF2       | IKZF2       | 576.3146862 | 404.2053191 | 159.8211798 |             |
| 762.6881678 |             |             |             |             |             |
| HPCAL4      | HPCAL4      | 15.22782708 | 108.6682642 | 341.0708977 |             |
| 179.1233027 |             |             |             |             |             |
| MME         | MME         | 18.74194102 | 0           | 33.03566286 | 52.79423658 |
| RPS27L      | RPS27L      | 9792.664181 | 11748.35963 | 9333.914042 |             |
| 6276.857628 |             |             |             |             |             |
| CD93        | CD93        | 49.19759517 | 0           | 15.1785478  | 24.51160984 |
| FEN1        | FEN1        | 15704.5752  | 21806.77541 | 8496.415346 |             |
| 10486.25524 |             |             |             |             |             |
| LSM11       | LSM11       | 312.7561407 | 242.7263097 | 204.4639674 |             |
| 290.3683012 |             |             |             |             |             |
| WTAP        | WTAP        | 6697.90117  | 6257.057716 | 6839.275068 |             |
| 6692.612241 |             |             |             |             |             |
| IGLL1       | IGLL1       | 1.171371313 | 3.046773762 | 7.142846024 |             |
| 13.19855915 |             |             |             |             |             |
| ZDHHC16     | ZDHHC16     | 4778.023588 | 6433.770594 | 3304.459142 |             |
| 4129.263504 |             |             |             |             |             |
| NUDT6       | NUDT6       | 272.929516  | 339.2074789 | 211.6068135 |             |
| 197.9783872 |             |             |             |             |             |
| YEATS2      | YEATS2      | 2758.579443 | 1256.286381 | 1808.0329   |             |
| 1781.805485 |             |             |             |             |             |
| SNORA59A    | SNORA59A    |             | 2.342742627 | 4.062365016 |             |
| 2.678567259 | 8.484788022 |             |             |             |             |
| LOC606724   | LOC606724   |             | 10845.72699 | 13869.92976 |             |
| 4041.065138 | 6254.231527 |             |             |             |             |
| SNORA66     | SNORA66     | 10.54234182 | 19.29623383 | 25.89281684 |             |
| 24.51160984 |             |             |             |             |             |
| SNORA71D    | SNORA71D    |             | 30.45565415 | 40.62365016 |             |
| 59.82133545 | 29.22538097 |             |             |             |             |
| SNORA71C    | SNORA71C    |             | 35.1411394  | 21.32741634 | 0           |
|             | 16.02682182 |             |             |             |             |
| AUH         | AUH         | 1172.542685 | 1486.825596 | 1031.248395 |             |
| 1235.008034 |             |             |             |             |             |
| ATRNL1      | ATRNL1      | 28.11291152 | 140.1515931 | 27.67852834 |             |
| 6.599279573 |             |             |             |             |             |
| AAGAB       | AAGAB       | 5943.538044 | 6410.411996 | 5062.49212  |             |
| 5336.931666 |             |             |             |             |             |
| MYPOP       | MYPOP       | 29.28428284 | 14.21827756 | 11.60712479 |             |
| 12.25580492 |             |             |             |             |             |
| SEMA3A      | SEMA3A      | 8.199599194 | 44.68601518 | 1.785711506 | 0           |
| CAMTA2      | CAMTA2      | 2757.408072 | 1663.538474 | 1465.176291 |             |
| 2129.681794 |             |             |             |             |             |
| CD244       | CD244       | 99.56656164 | 93.43439537 | 125.8926612 |             |

|             |            |             |             |             |             |
|-------------|------------|-------------|-------------|-------------|-------------|
| 160.2682182 |            |             |             |             |             |
| TCF4        | TCF4       | 351.411394  | 102.5747167 | 17.85711506 |             |
| 128.2145746 |            |             |             |             |             |
| SENP7       | SENP7      | 930.0688229 | 635.760125  | 1344.640764 |             |
| 1317.027652 |            |             |             |             |             |
| ASAP1-IT1   | ASAP1-IT1  | 0           | 1.015591254 | 0           | 0           |
| DLEU2       | DLEU2      | 864.4720293 | 715.9918341 | 484.8206739 |             |
| 748.5468544 |            |             |             |             |             |
| LYSMD4      | LYSMD4     | 1064.776524 | 605.2923874 | 1000.891299 |             |
| 992.7201986 |            |             |             |             |             |
| COMMD4      | COMMD4     | 3050.2509   | 3545.429068 | 1553.56901  |             |
| 1862.882348 |            |             |             |             |             |
| GCOM1       | GCOM1      | 3043.222672 | 2734.987247 | 3806.244075 |             |
| 3919.972066 |            |             |             |             |             |
| SNORA15     | SNORA15    | 1.171371313 | 4.062365016 | 8.92855753  |             |
| 4.713771124 |            |             |             |             |             |
| SNORA12     | SNORA12    | 15.22782708 | 9.140321286 | 25.89281684 |             |
| 18.85508449 |            |             |             |             |             |
| NVL         | NVL        | 2369.684167 | 3144.270523 | 2287.496439 |             |
| 2039.177388 |            |             |             |             |             |
| SNORA17     | SNORA17    | 12.88508445 | 7.109138778 | 49.99992217 |             |
| 27.33987252 |            |             |             |             |             |
| SNORD17     | SNORD17    | 114.7943887 | 127.964498  | 49.10706642 |             |
| 48.08046546 |            |             |             |             |             |
| SUM01P3     | SUM01P3    | 30.45565415 | 25.38978135 | 32.14280711 |             |
| 41.48118589 |            |             |             |             |             |
| PIM1        | PIM1       | 18306.19089 | 21152.73464 | 7467.845518 |             |
| 8889.229585 |            |             |             |             |             |
| ATP7B       | ATP7B      | 21.08468364 | 31.48332888 | 103.5712674 |             |
| 37.71016899 |            |             |             |             |             |
| ENTPD8      | ENTPD8     | 0           | 0           | 3.771016899 |             |
| CA13        | CA13       | 22.25605496 | 8.124730032 | 13.3928363  |             |
| 24.51160984 |            |             |             |             |             |
| ARHGDIB     | ARHGDIB    | 117964.1195 | 150827.4883 | 52486.52544 |             |
| 67892.44549 |            |             |             |             |             |
| HSPA13      | HSPA13     | 3190.815458 | 3166.61353  | 3769.636989 |             |
| 2937.622164 |            |             |             |             |             |
| PRB3        | PRB3       | 9.370970508 | 3.046773762 | 9.821413283 |             |
| 12.25580492 |            |             |             |             |             |
| SRP72       | SRP72      | 8180.857253 | 9874.593763 | 7045.524747 |             |
| 8084.117477 |            |             |             |             |             |
| RPUSD4      | RPUSD4     | 1492.327053 | 1974.309398 | 2008.925444 |             |
| 1509.349514 |            |             |             |             |             |
| NUTM2B-AS1  | NUTM2B-AS1 |             | 837.5304891 | 830.7536458 |             |
| 762.4988131 |            | 1092.652146 |             |             |             |
| ASPHD2      | ASPHD2     | 2065.127626 | 3231.61137  | 1519.640492 |             |
| 1370.764643 |            |             |             |             |             |
| SALL4       | SALL4      | 0           | 7.109138778 | 0           | 0           |
| GJC2        | GJC2       | 1.171371313 | 0           | 0           | 2.828262674 |
| GALNT11     | GALNT11    | 1527.468193 | 2005.792727 | 2558.031732 |             |



|              |              |             |             |             |             |             |
|--------------|--------------|-------------|-------------|-------------|-------------|-------------|
| 2091.02887   |              |             |             |             |             |             |
| CAND2        | CAND2        | 10.54234182 |             | 15.23386881 |             | 58.03562395 |
| 148.0124133  |              |             |             |             |             |             |
| CH25H        | CH25H        | 0           | 3.046773762 |             | 15.1785478  | 4.713771124 |
| SEC61B       | SEC61B       | 8279.252444 |             | 9020.481518 |             | 6289.275924 |
| 6208.979324  |              |             |             |             |             |             |
| NEURL3       | NEURL3       | 120.6512453 |             | 77.18493531 |             | 74.1070275  |
| 113.130507   |              |             |             |             |             |             |
| SLC37A4      | SLC37A4      | 1706.688004 |             | 1881.890594 |             | 1089.284019 |
| 1425.444388  |              |             |             |             |             |             |
| STIL         | STIL         | 5732.691208 |             | 5892.460456 |             | 2241.960796 |
| 2685.906786  |              |             |             |             |             |             |
| PLD5         | PLD5         | 0           | 0           | 1.785711506 |             | 0           |
| EPB42        | EPB42        | 0           | 0           | 7.142846024 |             | 0           |
| LOC101928128 | LOC101928128 |             |             | 0           | 0           | 2.678567259 |
| CFLAR        | CFLAR        | 10598.56764 |             | 10082.78997 |             | 9261.592726 |
| 9516.161144  |              |             |             |             |             |             |
| DHFRL1       | DHFRL1       | 1142.087031 |             | 928.2504062 |             | 650.891844  |
| 980.4643937  |              |             |             |             |             |             |
| RAI2         | RAI2         | 25.7701689  |             | 27.42096386 |             | 305.3566675 |
| 107.4739816  |              |             |             |             |             |             |
| CHD1         | CHD1         | 3406.34778  |             | 2517.650719 |             | 3465.173178 |
| 3750.276306  |              |             |             |             |             |             |
| PEX10        | PEX10        | 960.524477  |             | 1217.693914 |             | 994.6413089 |
| 990.8346902  |              |             |             |             |             |             |
| PDGFRB       | PDGFRB       | 44.51210991 |             | 26.40537261 |             | 20.53568232 |
| 5.656525348  |              |             |             |             |             |             |
| GRIA3        | GRIA3        | 0           | 0           | 0           | 1.885508449 |             |
| SRSF5        | SRSF5        | 10472.05954 |             | 7937.861242 |             | 15272.29766 |
| 15117.06399  |              |             |             |             |             |             |
| TMEM115      | TMEM115      | 1830.853363 |             | 2704.51951  |             | 2880.352659 |
| 2535.06611   |              |             |             |             |             |             |
| TMEM99       | TMEM99       | 692.2804463 |             | 843.9563321 |             | 868.7486477 |
| 658.0424489  |              |             |             |             |             |             |
| KCNK4        | KCNK4        | 1.171371313 |             | 0           | 0           | 0           |
| FBX024       | FBX024       | 30.45565415 |             | 53.82633646 |             | 55.35705669 |
| 38.65292321  |              |             |             |             |             |             |
| MPHOSPH10    | MPHOSPH10    |             |             | 2020.615516 |             | 2133.757225 |
| 3410.708977  |              | 2775.468438 |             |             |             |             |
| PRDM4        | PRDM4        | 3343.093729 |             | 3295.593619 |             | 3396.423285 |
| 3240.24627   |              |             |             |             |             |             |
| GATA6        | GATA6        | 0           | 0           | 2.678567259 |             | 0           |
| PGF          | PGF          | 5.856856567 |             | 25.38978135 |             | 31.24995136 |
| YY2          | YY2          | 103.0806756 |             | 120.8553592 |             | 118.7498152 |
| 97.10368515  |              |             |             |             |             |             |
| CDH26        | CDH26        | 8.199599194 |             | 3.046773762 |             | 15.1785478  |
| 26.39711829  |              |             |             |             |             |             |
| SERP2        | SERP2        | 2.342742627 |             | 0           | 0           | 9.427542247 |
| EPS15L1      | EPS15L1      | 1573.151674 |             | 1254.255199 |             | 820.534437  |
| 882.4179543  |              |             |             |             |             |             |

|             |             |             |             |             |
|-------------|-------------|-------------|-------------|-------------|
| RAB28       | RAB28       | 1125.687832 | 1018.638028 | 1210.712401 |
| 1105.850706 |             |             |             |             |
| NECAP2      | NECAP2      | 9298.345486 | 14205.07487 | 10299.98397 |
| 9028.75721  |             |             |             |             |
| RAD54L      | RAD54L      | 3618.365987 | 3162.551165 | 1535.711895 |
| 2042.948405 |             |             |             |             |
| BOD1        | BOD1        | 312.7561407 | 192.9623383 | 424.1064827 |
| 418.5828758 |             |             |             |             |
| FAM217B     | FAM217B     | 2181.093386 | 1664.554065 | 1518.747636 |
| 2063.688998 |             |             |             |             |
| FAM177A1    | FAM177A1    |             | 1858.966274 | 1991.574449 |
| 1828.568582 | 1955.272262 |             |             |             |
| KIT         | KIT         | 111.2802748 | 1980.402945 | 445.5350208 |
| 459.1213074 |             |             |             |             |
| PRL         | PRL         | 0           | 4.062365016 | 0           |
| 2.828262674 |             |             |             |             |
| TRIQK       | TRIQK       | 69.11090749 | 13.2026863  | 79.46416202 |
| 106.5312274 |             |             |             |             |
| SGOL2       | SGOL2       | 2299.401888 | 2057.587881 | 907.1414451 |
| 1383.020448 |             |             |             |             |
| SCN1A       | SCN1A       | 7.028227881 | 3.046773762 | 15.1785478  |
| 3.771016899 |             |             |             |             |
| RAB43       | RAB43       | 1432.587116 | 1000.357385 | 1115.176836 |
| 1010.632529 |             |             |             |             |
| SGCE        | SGCE        | 4.685485254 | 8.124730032 | 13.3928363  |
| 7.542033798 |             |             |             |             |
| TCEB1       | TCEB1       | 5363.709244 | 4926.633173 | 3141.959395 |
| 3176.138983 |             |             |             |             |
| GSTM5       | GSTM5       | 1.171371313 | 0           | 0           |
| 4.713771124 |             |             |             |             |
| CTSL        | CTSL        | 494.3186943 | 4600.628381 | 2855.352698 |
| 2227.728233 |             |             |             |             |
| PSMB4       | PSMB4       | 5000.584137 | 5099.283687 | 2887.495505 |
| 2946.106952 |             |             |             |             |
| STAG2       | STAG2       | 8331.964153 | 6596.265195 | 8158.023015 |
| 9715.082286 |             |             |             |             |
| RMDN1       | RMDN1       | 2677.754823 | 2697.410371 | 2062.49679  |
| 2421.935603 |             |             |             |             |
| SUSD1       | SUSD1       | 1458.357285 | 1542.683115 | 296.42811   |
| 318.650928  |             |             |             |             |
| C22orf39    | C22orf39    |             | 1956.190093 | 1960.09112  |
| 2004.461166 | 2109.883955 |             |             |             |
| CGREF1      | CGREF1      | 309.2420268 | 680.4461402 | 403.5708004 |
| 253.6008864 |             |             |             |             |
| HEATR5B     | HEATR5B     | 2361.484568 | 1639.164284 | 1808.0329   |
| 2124.968023 |             |             |             |             |
| TBC1D16     | TBC1D16     | 103.0806756 | 57.88870148 | 103.5712674 |
| 105.5884732 |             |             |             |             |
| FAM105A     | FAM105A     | 2397.797079 | 4021.741366 | 2797.317074 |
| 2473.787086 |             |             |             |             |
| C6orf62     | C6orf62     | 9224.549093 | 4744.842339 | 7514.274018 |
| 7503.380875 |             |             |             |             |

|              |              |             |             |             |             |
|--------------|--------------|-------------|-------------|-------------|-------------|
| POLR1B       | POLR1B       | 5007.612365 | 5557.315342 | 5075.884956 |             |
| 5931.809582  |              |             |             |             |             |
| PCDHGA10     | PCDHGA10     |             | 0           | 15.23386881 | 40.17850889 |
|              | 14.14131337  |             |             |             |             |
| TOLLIP       | TOLLIP       | 3071.335584 | 3811.513976 | 4422.314545 |             |
| 3326.979659  |              |             |             |             |             |
| LOC101928363 | LOC101928363 |             | 4.685485254 | 4.062365016 |             |
| 8.92855753   | 0            |             |             |             |             |
| MPL          | MPL          | 1.171371313 | 3.046773762 | 1.785711506 | 0           |
| INPP1        | INPP1        | 949.9821352 | 1623.930415 | 843.7486866 |             |
| 935.2121909  |              |             |             |             |             |
| DCST1        | DCST1        | 9.370970508 | 15.23386881 | 33.03566286 |             |
| 24.51160984  |              |             |             |             |             |
| ARID3B       | ARID3B       | 4220.450842 | 4221.812843 | 2464.281878 |             |
| 2315.404376  |              |             |             |             |             |
| TBL3         | TBL3         | 5367.223358 | 8231.367114 | 6023.20491  |             |
| 5206.831583  |              |             |             |             |             |
| VM01         | VM01         | 2.342742627 | 2.031182508 | 0.892855753 |             |
| 13.19855915  |              |             |             |             |             |
| ARMC1        | ARMC1        | 4803.793757 | 5150.063249 | 4256.243375 |             |
| 4335.726679  |              |             |             |             |             |
| CCDC186      | CCDC186      | 986.2946459 | 861.2213834 | 1432.140628 |             |
| 1484.837904  |              |             |             |             |             |
| THAP1        | THAP1        | 1796.883595 | 2063.681428 | 1875.889937 |             |
| 1978.841118  |              |             |             |             |             |
| ANKRD45      | ANKRD45      | 0           | 11.17150379 | 0           | 0           |
| SETD3        | SETD3        | 3942.835841 | 4245.171442 | 3243.744951 |             |
| 3636.203045  |              |             |             |             |             |
| RORA         | RORA         | 3975.634238 | 3094.506551 | 3720.529923 |             |
| 5560.364417  |              |             |             |             |             |
| CYGB         | CYGB         | 3.51411394  | 2.031182508 | 33.03566286 | 0           |
| RAD17        | RAD17        | 3210.72877  | 3304.733941 | 3603.565819 |             |
| 3626.775502  |              |             |             |             |             |
| POGZ         | POGZ         | 946.4680213 | 601.2300224 | 1232.140939 |             |
| 958.7810465  |              |             |             |             |             |
| NADK2        | NADK2        | 859.7865441 | 768.8025793 | 1811.604323 |             |
| 1463.154557  |              |             |             |             |             |
| CCDC77       | CCDC77       | 842.2159744 | 842.9407409 | 606.2490563 |             |
| 689.1533383  |              |             |             |             |             |
| CHCHD4       | CHCHD4       | 1557.923847 | 2115.476582 | 1308.926534 |             |
| 1349.081296  |              |             |             |             |             |
| SLC17A3      | SLC17A3      | 4.685485254 | 2.031182508 | 16.07140355 |             |
| 11.3130507   |              |             |             |             |             |
| AP1B1        | AP1B1        | 10507.20068 | 7376.239278 | 3336.601949 |             |
| 4404.547738  |              |             |             |             |             |
| ATP5L2       | ATP5L2       | 12.88508445 | 1.015591254 | 16.96425931 |             |
| 0.942754225  |              |             |             |             |             |
| C10orf67     | C10orf67     |             | 31.62702546 | 30.46773762 |             |
| 3.571423012  | 7.542033798  |             |             |             |             |
| SLC12A9      | SLC12A9      | 1049.548697 | 374.7531727 | 436.6064632 |             |

|             |             |             |             |             |
|-------------|-------------|-------------|-------------|-------------|
| 412.9263504 |             |             |             |             |
| KCTD10      | KCTD10      | 5154.033779 | 5604.03254  | 3860.708276 |
| 3950.140202 |             |             |             |             |
| MCF2L       | MCF2L       | 14.05645576 | 13.2026863  | 49.10706642 |
| 102.7602105 |             |             |             |             |
| GJC3        | GJC3        | 4.685485254 | 2.031182508 | 10.71426904 |
| 0.942754225 |             |             |             |             |
| VPS13B      | VPS13B      | 2758.579443 | 1876.812637 | 2547.317463 |
| 2824.491657 |             |             |             |             |
| AQP11       | AQP11       | 72.62502143 | 71.09138778 | 64.28561422 |
| 50.90872813 |             |             |             |             |
| ELOVL2      | ELOVL2      | 2.342742627 | 0           | 40.17850889 |
| G2E3        | G2E3        | 2168.208301 | 1983.449719 | 1926.782715 |
| 1932.646161 |             |             |             |             |
| LRRC40      | LRRC40      | 2101.440136 | 2090.086801 | 1627.676038 |
| 1798.775061 |             |             |             |             |
| GSDMD       | GSDMD       | 9238.605549 | 8447.688051 | 5417.848709 |
| 7820.146294 |             |             |             |             |
| DI02        | DI02        | 4.685485254 | 0           | 0           |
| NUPL1       | NUPL1       | 7049.312564 | 6833.913549 | 5266.063231 |
| 5867.702295 |             |             |             |             |
| BRWD1       | BRWD1       | 3439.146176 | 2940.13668  | 3885.708237 |
| 4876.867604 |             |             |             |             |
| ZXDC        | ZXDC        | 2196.321213 | 2201.801839 | 3454.458908 |
| 3031.897587 |             |             |             |             |
| MT2A        | MT2A        | 16118.06927 | 9639.992183 | 8832.129109 |
| 12585.7689  |             |             |             |             |
| TPR         | TPR         | 11123.34199 | 9657.257235 | 10423.19806 |
| 10895.41058 |             |             |             |             |
| ARHGAP22    | ARHGAP22    |             | 1.171371313 | 1.015591254 |
| 4.464278765 | 1.885508449 |             |             |             |
| GABPA       | GABPA       | 3782.357971 | 3137.161384 | 3364.280477 |
| 3162.940424 |             |             |             |             |
| ADCY4       | ADCY4       | 16.39919839 | 4.062365016 | 118.7498152 |
| 42.42394011 |             |             |             |             |
| RIOK2       | RIOK2       | 2302.916002 | 3209.268363 | 3278.566325 |
| 2999.843943 |             |             |             |             |
| CKB         | CKB         | 98.39519033 | 62.96665775 | 89.2855753  |
| 402.556054  |             |             |             |             |
| CRYBA4      | CRYBA4      | 0           | 9.140321286 | 0           |
| CHGB        | CHGB        | 16.39919839 | 5.07795627  | 87.4998638  |
| 55.62249926 |             |             |             |             |
| RHOH        | RHOH        | 4985.35631  | 6593.218421 | 8200.880092 |
| 7303.516979 |             |             |             |             |
| SUPT7L      | SUPT7L      | 3385.263096 | 3559.647345 | 3155.352231 |
| 3234.589745 |             |             |             |             |
| LINC00589   | LINC00589   |             | 3.51411394  | 3.046773762 |
| 41.96422039 | 1.885508449 |             |             |             |
| BMS1P4      | BMS1P4      | 285.8146005 | 192.9623383 | 368.749426  |
| 324.3074533 |             |             |             |             |

|             |             |             |   |             |             |
|-------------|-------------|-------------|---|-------------|-------------|
| PCDHA10     | PCDHA10     | 0           | 0 | 8.035701777 | 0           |
| GALNTL6     | GALNTL6     | 0           | 0 | 0           | 1.885508449 |
| HAR1A       | HAR1A       | 31.62702546 |   | 7.109138778 | 59.82133545 |
| 209.2914379 |             |             |   |             |             |
| SNHG11      | SNHG11      | 434.5787573 |   | 462.0940206 | 521.4277598 |
| 461.0068159 |             |             |   |             |             |
| TROAP       | TROAP       | 2830.033093 |   | 2989.900652 | 805.3558892 |
| 1496.150955 |             |             |   |             |             |
| HSF4        | HSF4        | 209.6754651 |   | 233.5859884 | 97.32127708 |
| 157.4399555 |             |             |   |             |             |
| DFNB31      | DFNB31      | 168.6774691 |   | 226.4768497 | 208.0353905 |
| 103.7029647 |             |             |   |             |             |
| BEND4       | BEND4       | 42.16936728 |   | 61.9510665  | 0           |
| SLFN12L     | SLFN12L     | 540.0021755 |   | 220.3833021 | 399.9993774 |
| 503.430756  |             |             |   |             | 1.885508449 |
| KCNAB1      | KCNAB1      | 36.31251072 |   | 13.2026863  | 32.14280711 |
| 58.45076193 |             |             |   |             |             |
| RPL38       | RPL38       | 9780.950467 |   | 10482.93292 | 9818.734716 |
| 9032.528227 |             |             |   |             |             |
| SLC9A7      | SLC9A7      | 1504.040766 |   | 1951.96639  | 989.2841744 |
| 926.7274029 |             |             |   |             |             |
| SPX         | SPX         | 40.99799597 |   | 61.9510665  | 8.035701777 |
| 22.62610139 |             |             |   |             |             |
| C1orf86     | C1orf86     | 1460.700028 |   | 1744.785774 | 1404.4621   |
| 1413.188583 |             |             |   |             |             |
| RASL11A     | RASL11A     | 24.59879758 |   | 13.2026863  | 28.5713841  |
| 40.53843166 |             |             |   |             |             |
| C14orf166   | C14orf166   |             |   | 7672.482103 | 9662.335191 |
| 6917.846374 | 6702.039783 |             |   |             |             |
| SBDS        | SBDS        | 2569.988662 |   | 3359.575868 | 6339.275847 |
| 4272.562146 |             |             |   |             |             |
| ZNF107      | ZNF107      | 2677.754823 |   | 1811.814797 | 2699.995797 |
| 2964.962037 |             |             |   |             |             |
| SLC26A7     | SLC26A7     | 2.342742627 |   | 3.046773762 | 4.464278765 |
| 0.942754225 |             |             |   |             |             |
| SLC13A4     | SLC13A4     | 22.25605496 |   | 14.21827756 | 57.14276819 |
| 29.22538097 |             |             |   |             |             |
| PPHLN1      | PPHLN1      | 5351.995531 |   | 5367.399778 | 4489.278726 |
| 4484.681847 |             |             |   |             |             |
| ACAP2       | ACAP2       | 3560.968793 |   | 2942.167863 | 2732.138604 |
| 2741.529285 |             |             |   |             |             |
| ATXN10      | ATXN10      | 5735.033951 |   | 6588.140465 | 5449.991516 |
| 6232.54818  |             |             |   |             |             |
| FAM65B      | FAM65B      | 12307.59839 |   | 11585.86503 | 13011.58689 |
| 10257.16596 |             |             |   |             |             |
| GLB1L       | GLB1L       | 227.2460348 |   | 209.2117983 | 324.1066384 |
| 236.6313104 |             |             |   |             |             |
| GUSBP9      | GUSBP9      | 76.13913537 |   | 58.90429273 | 82.14272928 |
| 79.19135488 |             |             |   |             |             |
| ATG5        | ATG5        | 3611.337759 |   | 4350.792932 | 3657.137164 |

|             |             |             |             |             |
|-------------|-------------|-------------|-------------|-------------|
| 3441.995674 |             |             |             |             |
| POLN        | POLN        | 108.9375322 | 73.12257029 | 64.28561422 |
| 65.05004151 |             |             |             |             |
| TMEM217     | TMEM217     | 414.665445  | 553.4972335 | 122.3212382 |
| 164.0392351 |             |             |             |             |
| GBGT1       | GBGT1       | 11.71371313 | 17.26505132 | 57.14276819 |
| 19.79783872 |             |             |             |             |
| C10orf128   | C10orf128   |             | 2045.214313 | 1114.103606 |
| 702.6774776 | 2729.273481 |             |             |             |
| DUSP22      | DUSP22      | 987.4660172 | 1023.715984 | 1568.747558 |
| 1415.074091 |             |             |             |             |
| USP49       | USP49       | 459.1775549 | 285.3811424 | 365.178003  |
| 474.205375  |             |             |             |             |
| CAPS2       | CAPS2       | 32.79839678 | 24.3741901  | 57.14276819 |
| 55.62249926 |             |             |             |             |
| SAMSN1      | SAMSN1      | 8014.522527 | 11929.13487 | 7669.630919 |
| 8818.523018 |             |             |             |             |
| FUS         | FUS         | 13647.64717 | 6831.882366 | 9174.985718 |
| 8274.55383  |             |             |             |             |
| CHRM4       | CHRM4       | 2.342742627 | 2.031182508 | 11.60712479 |
| 8.484788022 |             |             |             |             |
| CHRM2       | CHRM2       | 0           | 0           | 3.571423012 |
| GBAS        | GBAS        | 4461.753333 | 4556.957957 | 2441.067629 |
| 3484.419615 |             |             |             |             |
| NPTN        | NPTN        | 2573.502776 | 2232.269576 | 1831.247149 |
| 2618.028482 |             |             |             |             |
| LARP6       | LARP6       | 3.51411394  | 0           | 3.571423012 |
| BCS1L       | BCS1L       | 1564.952075 | 2544.056091 | 1633.033172 |
| 1603.624936 |             |             |             |             |
| PROB1       | PROB1       | 737.9639275 | 1043.012218 | 218.7496595 |
| 287.5400385 |             |             |             |             |
| RPAIN       | RPAIN       | 5772.517833 | 7530.609149 | 6070.526265 |
| 6678.470928 |             |             |             |             |
| LILRA3      | LILRA3      | 0           | 0           | 103.5712674 |
| SCHIP1      | SCHIP1      | 11.71371313 | 2.031182508 | 0           |
| CANT1       | CANT1       | 1734.800915 | 567.715511  | 460.7135686 |
| 678.7830418 |             |             |             |             |
| CHFR        | CHFR        | 4738.196963 | 4868.744472 | 2332.139227 |
| 3241.189025 |             |             |             |             |
| FMR1        | FMR1        | 1142.087031 | 1281.676163 | 1834.818572 |
| 1269.889941 |             |             |             |             |
| PACSIN2     | PACSIN2     | 2657.84151  | 2578.586194 | 2707.138643 |
| 2201.331115 |             |             |             |             |
| TRIM6       | TRIM6       | 7.028227881 | 4.062365016 | 1.785711506 |
| 4.713771124 |             |             |             |             |
| SMIM18      | SMIM18      | 9.370970508 | 5.07795627  | 4.464278765 |
| 5.656525348 |             |             |             |             |
| STUB1       | STUB1       | 6642.846719 | 9363.751362 | 8170.522996 |
| 7786.207142 |             |             |             |             |
| NFKBIZ      | NFKBIZ      | 2888.601659 | 2748.189933 | 3837.494027 |

|             |           |             |             |             |             |
|-------------|-----------|-------------|-------------|-------------|-------------|
| 4454.513712 |           |             |             |             |             |
| CPM         | CPM       | 899.6131687 | 590.0585186 | 248.2138993 |             |
| 1178.442781 |           |             |             |             |             |
| RBF0X3      | RBF0X3    | 4.685485254 | 2.031182508 | 17.85711506 |             |
| 3.771016899 |           |             |             |             |             |
| SYT3        | SYT3      | 0           | 0           | 25.89281684 | 0.942754225 |
| YARS2       | YARS2     | 1676.23235  | 1934.701339 | 1393.74783  |             |
| 1520.662564 |           |             |             |             |             |
| C3orf56     | C3orf56   | 0           | 0           | 0.892855753 | 0           |
| ANAPC15     | ANAPC15   | 2746.86573  | 3595.193039 | 1437.497762 |             |
| 1717.698197 |           |             |             |             |             |
| SPIDR       | SPIDR     | 2090.897795 | 1866.656725 | 1464.283435 |             |
| 1924.161373 |           |             |             |             |             |
| RALGAPB     | RALGAPB   | 4171.253247 | 3791.202151 | 4518.742966 |             |
| 4039.701853 |           |             |             |             |             |
| UBE3C       | UBE3C     | 6683.844715 | 5254.669148 | 4345.52895  |             |
| 4894.779935 |           |             |             |             |             |
| CD14        | CD14      | 5.856856567 | 0           | 47.32135491 | 23.56885562 |
| BCL2L14     | BCL2L14   | 167.5060978 | 420.4547792 | 926.7842716 |             |
| 777.7722354 |           |             |             |             |             |
| HMG5        | HMG5      | 192.1048954 | 135.0736368 | 142.8569205 |             |
| 157.4399555 |           |             |             |             |             |
| TANC2       | TANC2     | 130.0222158 | 14.21827756 | 307.142379  |             |
| 324.3074533 |           |             |             |             |             |
| WNT4        | WNT4      | 0           | 0           | 4.713771124 |             |
| NRBF2       | NRBF2     | 2232.633723 | 2551.16523  | 2427.674792 |             |
| 2149.479632 |           |             |             |             |             |
| DISP1       | DISP1     | 144.0786716 | 191.946747  | 291.0709755 |             |
| 324.3074533 |           |             |             |             |             |
| KPNA7       | KPNA7     | 0           | 2.031182508 | 0           | 1.885508449 |
| SRP9        | SRP9      | 20078.47568 | 17643.86686 | 13568.72888 |             |
| 17117.58846 |           |             |             |             |             |
| STYX        | STYX      | 4097.456854 | 2942.167863 | 2471.424724 |             |
| 3405.22826  |           |             |             |             |             |
| CEACAM19    | CEACAM19  |             | 7.028227881 | 0           | 1.785711506 |
| 0           |           |             |             |             |             |
| PDZK1       | PDZK1     | 4.685485254 | 14.21827756 | 33.92851862 |             |
| 14.14131337 |           |             |             |             |             |
| PRKAA1      | PRKAA1    | 3864.353963 | 2762.408211 | 3283.030604 |             |
| 3694.653807 |           |             |             |             |             |
| SLC12A4     | SLC12A4   | 1965.561064 | 2021.026596 | 1124.105393 |             |
| 1268.004432 |           |             |             |             |             |
| PRKCB       | PRKCB     | 14589.42971 | 13001.59923 | 10014.27013 |             |
| 13650.13842 |           |             |             |             |             |
| MIR3153     | MIR3153   | 18.74194102 | 6.093547524 | 5.357134518 |             |
| 6.599279573 |           |             |             |             |             |
| MIR3143     | MIR3143   | 2.342742627 | 1.015591254 | 0           | 5.656525348 |
| MIR3199-2   | MIR3199-2 |             | 0           | 0           | 3.571423012 |
| 0           |           |             |             |             | 0           |
| SPATA33     | SPATA33   | 320.9557399 | 234.6015797 | 189.2854196 |             |
| 211.1769463 |           |             |             |             |             |

|              |              |             |             |             |             |
|--------------|--------------|-------------|-------------|-------------|-------------|
| MIR3200      | MIR3200      | 1.171371313 | 0           | 0           | 0           |
| PRDM11       | PRDM11       | 52.71170911 | 36.56128515 | 142.8569205 |             |
| 129.1573288  |              |             |             |             |             |
| MELK         | MELK         | 6252.780071 | 6107.765802 | 2598.210241 |             |
| 3780.444441  |              |             |             |             |             |
| FAM193A      | FAM193A      | 836.3591178 | 587.0117448 | 1102.676855 |             |
| 635.4163475  |              |             |             |             |             |
| MIR4315-2    | MIR4315-2    |             | 228.4174061 | 262.0225435 |             |
| 290.1781197  | 234.745802   |             |             |             |             |
| BRSK2        | BRSK2        | 1.171371313 | 1.015591254 | 15.1785478  |             |
| 7.542033798  |              |             |             |             |             |
| TUBGCP2      | TUBGCP2      | 4890.475234 | 6547.516815 | 4343.743238 |             |
| 4346.096976  |              |             |             |             |             |
| MIR941-4     | MIR941-4     |             | 0           | 1.015591254 | 0           |
| 2.828262674  |              |             |             |             |             |
| CHRNA7       | CHRNA7       | 0           | 1.015591254 | 0           | 0           |
| HCP5         | HCP5         | 24.59879758 | 3.046773762 | 11.60712479 |             |
| 36.76741476  |              |             |             |             |             |
| ZNF74        | ZNF74        | 493.147323  | 608.3391612 | 1090.176874 |             |
| 623.1605425  |              |             |             |             |             |
| SSBP1        | SSBP1        | 8684.546918 | 9579.056708 | 7085.703256 |             |
| 7777.722354  |              |             |             |             |             |
| TBC1D10C     | TBC1D10C     |             | 13972.11703 | 18376.10815 |             |
| 7458.024105  | 7880.482564  |             |             |             |             |
| TSP0         | TSP0         | 6197.72562  | 9110.86914  | 4852.671018 |             |
| 4980.570569  |              |             |             |             |             |
| BLOC1S1      | BLOC1S1      | 2817.148009 | 2993.963017 | 2010.711156 |             |
| 2173.991242  |              |             |             |             |             |
| CYP21A1P     | CYP21A1P     |             | 1.171371313 | 0           | 0           |
| LOC100130476 | LOC100130476 |             | 189.7621528 | 239.679536  | 0           |
| 233.0353515  | 263.9711829  |             |             |             |             |
| ZNF663P      | ZNF663P      | 0           | 1.015591254 | 5.357134518 | 1.885508449 |
| LOC283693    | LOC283693    |             | 24.59879758 | 16.24946006 |             |
| 13.3928363   | 59.39351616  |             |             |             |             |
| HERC2P9      | HERC2P9      | 154.6210134 | 105.6214904 | 142.8569205 |             |
| 105.5884732  |              |             |             |             |             |
| ZSCAN18      | ZSCAN18      | 185.0766675 | 278.2720036 | 1787.497218 |             |
| 1246.321085  |              |             |             |             |             |
| C3           | C3           | 0           | 0           | 20.53568232 | 16.02682182 |
| SLC26A1      | SLC26A1      | 161.6492413 | 74.13816155 | 211.6068135 |             |
| 247.9443611  |              |             |             |             |             |
| OLAH         | OLAH         | 14.05645576 | 54.84192772 | 22.32139383 |             |
| 7.542033798  |              |             |             |             |             |
| DOHH         | DOHH         | 2945.998853 | 3389.028015 | 2062.49679  |             |
| 1828.000442  |              |             |             |             |             |
| KATNAL2      | KATNAL2      | 22.25605496 | 14.21827756 | 17.85711506 |             |
| 35.82466054  |              |             |             |             |             |
| TIGD4        | TIGD4        | 18.74194102 | 4.062365016 | 26.78567259 |             |
| 42.42394011  |              |             |             |             |             |
| GLT8D2       | GLT8D2       | 18.74194102 | 13.2026863  | 60.71419121 |             |



|                |                |             |   |             |             |
|----------------|----------------|-------------|---|-------------|-------------|
| 28.28262674    |                |             |   |             |             |
| PRR3           | PRR3           | 0           | 0 | 0           | 2.828262674 |
| FGGY           | FGGY           | 333.8408243 |   | 569.7466935 | 371.4279933 |
| 222.489997     |                |             |   |             |             |
| TMEM209        | TMEM209        | 5691.693212 |   | 5213.029907 | 4341.957527 |
| 5288.851201    |                |             |   |             |             |
| ARSG           | ARSG           | 392.40939   |   | 168.5881482 | 310.7138021 |
| 364.845885     |                |             |   |             |             |
| RASSF4         | RASSF4         | 216.703693  |   | 235.6171709 | 105.3569789 |
| 156.4972013    |                |             |   |             |             |
| IP6K3          | IP6K3          | 3.51411394  |   | 0           | 0           |
| UNC119         | UNC119         | 2480.964442 |   | 3383.950058 | 2319.639246 |
| 2373.855138    |                |             |   |             |             |
| BACE1          | BACE1          | 33.96976809 |   | 30.46773762 | 25.89281684 |
| 70.70656685    |                |             |   |             |             |
| FAM120A        | FAM120A        | 3679.277296 |   | 2927.949585 | 1884.818495 |
| 2162.678191    |                |             |   |             |             |
| C20orf203      | C20orf203      |             |   | 3.51411394  | 1.015591254 |
| 8.035701777    | 1.885508449    |             |   |             |             |
| IL12RB2        | IL12RB2        | 6854.864926 |   | 7424.987658 | 4105.350752 |
| 7540.148289    |                |             |   |             |             |
| RTN4           | RTN4           | 4357.501286 |   | 2707.566283 | 2915.174034 |
| 3049.809917    |                |             |   |             |             |
| RCAN2          | RCAN2          | 614.9699396 |   | 242.7263097 | 131.2497957 |
| 645.7866439    |                |             |   |             |             |
| DUSP28         | DUSP28         | 366.6392211 |   | 441.7821955 | 583.0348067 |
| 413.8691047    |                |             |   |             |             |
| RGPD1          | RGPD1          | 69.11090749 |   | 67.02902277 | 82.14272928 |
| 161.2109724    |                |             |   |             |             |
| DNMBP          | DNMBP          | 169.8488405 |   | 179.759652  | 308.0352348 |
| 309.2233857    |                |             |   |             |             |
| SLC39A10       | SLC39A10       |             |   | 1718.401717 | 1182.14822  |
| 666.9632475    | 1103.965197    |             |   |             |             |
| C12orf65       | C12orf65       |             |   | 1338.877411 | 1409.640661 |
| 3011.602455    | 2222.071708    |             |   |             |             |
| FAM178B        | FAM178B        | 0           | 0 | 8.92855753  | 6.599279573 |
| ACAP1          | ACAP1          | 12961.22358 |   | 14507.72106 | 7085.703256 |
| 9427.542247    |                |             |   |             |             |
| MCUR1          | MCUR1          | 2820.662123 |   | 2928.965177 | 1882.139927 |
| 2120.254251    |                |             |   |             |             |
| DROSHA         | DROSHA         | 3343.093729 |   | 2743.111977 | 2093.746741 |
| 2382.339926    |                |             |   |             |             |
| SYCE1L         | SYCE1L         | 346.7259088 |   | 470.2187506 | 373.2137048 |
| 435.5524518    |                |             |   |             |             |
| RPL17-C18orf32 | RPL17-C18orf32 |             |   | 12450.50569 | 13368.22768 |
| 13266.94363    | 12397.21806    |             |   |             |             |
| CSTF3          | CSTF3          | 2984.654107 |   | 3585.037127 | 2299.103564 |
| 3009.271485    |                |             |   |             |             |
| DPCD           | DPCD           | 254.187575  |   | 395.0649978 | 186.6068524 |
| 269.6277083    |                |             |   |             |             |

|             |           |             |             |             |   |
|-------------|-----------|-------------|-------------|-------------|---|
| IGLL5       | IGLL5     | 3.51411394  | 76.16934405 | 0           | 0 |
| OCLN        | OCLN      | 1.171371313 | 3.046773762 | 20.53568232 |   |
| 12.25580492 |           |             |             |             |   |
| ATP6AP1     | ATP6AP1   | 5852.171082 | 7025.860296 | 7133.917467 |   |
| 6134.50174  |           |             |             |             |   |
| SUPT6H      | SUPT6H    | 5881.455365 | 3716.048399 | 4117.850733 |   |
| 4818.416843 |           |             |             |             |   |
| ZC2HC1C     | ZC2HC1C   | 107.7661608 | 125.9333155 | 117.8569594 |   |
| 94.27542247 |           |             |             |             |   |
| GALNT12     | GALNT12   | 118.3085027 | 73.12257029 | 600.8919218 |   |
| 644.8438897 |           |             |             |             |   |
| GNB1L       | GNB1L     | 778.9619235 | 1413.703026 | 1039.284097 |   |
| 701.4091432 |           |             |             |             |   |
| LEPRE1      | LEPRE1    | 1782.827139 | 3225.517823 | 2974.102513 |   |
| 2048.60493  |           |             |             |             |   |
| CMTR2       | CMTR2     | 2997.539191 | 2584.679742 | 2413.3891   |   |
| 2814.121361 |           |             |             |             |   |
| SLC29A3     | SLC29A3   | 426.3791581 | 776.9273093 | 524.106327  |   |
| 512.8582982 |           |             |             |             |   |
| ERMARD      | ERMARD    | 1152.629372 | 1223.787461 | 1208.92669  |   |
| 1182.213798 |           |             |             |             |   |
| UBFD1       | UBFD1     | 4029.517318 | 4140.565543 | 2579.460271 |   |
| 3025.298307 |           |             |             |             |   |
| ZFHX4       | ZFHX4     | 0           | 1.785711506 | 0.942754225 |   |
| PCBP2-OT1   | PCBP2-OT1 | 443.0944856 | 366.6392211 | 411.3144579 |   |
| 488.3920969 |           |             |             |             |   |
| GPR125      | GPR125    | 768.4195816 | 842.9407409 | 203.5711117 |   |
| 470.4343581 |           |             |             |             |   |
| CERS3       | CERS3     | 1.171371313 | 1.015591254 | 5.357134518 |   |
| 3.771016899 |           |             |             |             |   |
| SLC45A1     | SLC45A1   | 9.370970508 | 11.17150379 | 24.10710533 |   |
| 57.50800771 |           |             |             |             |   |
| CLN3        | CLN3      | 2431.766847 | 3258.016743 | 2348.21063  |   |
| 2519.039288 |           |             |             |             |   |
| VAMP5       | VAMP5     | 2093.240537 | 3226.533414 | 1554.461866 |   |
| 1415.074091 |           |             |             |             |   |
| PTX3        | PTX3      | 0           | 1.015591254 | 0           |   |
| CDK2        | CDK2      | 5339.110447 | 5579.65835  | 2891.959784 |   |
| 3574.92402  |           |             |             |             |   |
| CPT1B       | CPT1B     | 1371.675808 | 251.866631  | 725.8917272 |   |
| 1022.888334 |           |             |             |             |   |
| BRD9        | BRD9      | 1930.419925 | 2257.659358 | 2312.4964   |   |
| 2064.631752 |           |             |             |             |   |
| AG03        | AG03      | 1304.907643 | 1164.883168 | 1368.747869 |   |
| 1377.363922 |           |             |             |             |   |
| ZNF485      | ZNF485    | 63.25405093 | 35.54569389 | 577.6776722 |   |
| 461.0068159 |           |             |             |             |   |
| PACS2       | PACS2     | 685.2522184 | 656.0719501 | 920.5342814 |   |
| 1046.457189 |           |             |             |             |   |
| APOL3       | APOL3     | 7360.897334 | 7786.538145 | 11817.83875 |   |

|                 |             |             |             |  |
|-----------------|-------------|-------------|-------------|--|
| 8837.378102     |             |             |             |  |
| MRPL33 MRPL33   | 3049.079529 | 3373.794146 | 2993.74534  |  |
| 2810.350344     |             |             |             |  |
| IRAK3 IRAK3     | 115.96576   | 125.9333155 | 5.357134518 |  |
| 31.11088942     |             |             |             |  |
| UTP18 UTP18     | 4905.703061 | 6098.625481 | 5200.884761 |  |
| 5549.051367     |             |             |             |  |
| GEMIN5 GEMIN5   | 3471.944573 | 3800.342473 | 3775.88698  |  |
| 3782.32995      |             |             |             |  |
| FANCF FANCF     | 1391.58912  | 1525.418064 | 1610.711778 |  |
| 1791.233027     |             |             |             |  |
| CLEC7A CLEC7A   | 5.856856567 | 4.062365016 | 19.64282657 |  |
| 42.42394011     |             |             |             |  |
| DIRC2 DIRC2     | 279.9577439 | 252.8822223 | 338.3923304 |  |
| 309.2233857     |             |             |             |  |
| PSMB8 PSMB8     | 71.45365012 | 474.2811156 | 408.9279349 |  |
| 89.56165135     |             |             |             |  |
| MARK1 MARK1     | 2.342742627 | 3.046773762 | 0 0         |  |
| PECR PECR       | 1068.290638 | 1336.51809  | 518.7491925 |  |
| 777.7722354     |             |             |             |  |
| NPPA NPPA       | 2.342742627 | 4.062365016 | 38.39279738 |  |
| 20.74059294     |             |             |             |  |
| DENND4C DENND4C | 3659.363983 | 3067.085587 | 4105.350752 |  |
| 3971.823549     |             |             |             |  |
| CXCL11 CXCL11   | 16.39919839 | 3.046773762 | 58.9284797  |  |
| 32.99639787     |             |             |             |  |
| CCL13 CCL13     | 1.171371313 | 1.015591254 | 65.17846997 |  |
| 13.19855915     |             |             |             |  |
| GPRC5A GPRC5A   | 11.71371313 | 2.031182508 | 0 0         |  |
| CALCB CALCB     | 4.685485254 | 4.062365016 | 5.357134518 |  |
| 6.599279573     |             |             |             |  |
| TMC7 TMC7       | 3.51411394  | 5.07795627  | 2.678567259 |  |
| 6.599279573     |             |             |             |  |
| PRF1 PRF1       | 8562.724301 | 12350.60524 | 3894.636795 |  |
| 4940.974892     |             |             |             |  |
| DHX8 DHX8       | 4111.51331  | 4622.971388 | 3642.851472 |  |
| 3584.351562     |             |             |             |  |
| CHP1 CHP1       | 3011.595647 | 1524.402472 | 858.9272344 |  |
| 1210.496425     |             |             |             |  |
| UTP11L UTP11L   | 3569.168392 | 4430.00905  | 3216.959278 |  |
| 3391.086946     |             |             |             |  |
| SLC6A8 SLC6A8   | 7.028227881 | 4.062365016 | 23.21424958 |  |
| 14.14131337     |             |             |             |  |
| H6PD H6PD       | 1034.32087  | 734.2724767 | 754.4631113 |  |
| 932.3839282     |             |             |             |  |
| PRRX2 PRRX2     | 18.74194102 | 42.65483267 | 33.92851862 |  |
| 18.85508449     |             |             |             |  |
| TCF19 TCF19     | 29.28428284 | 26.40537261 | 13.3928363  |  |
| 29.22538097     |             |             |             |  |
| U2AF1L4 U2AF1L4 | 1364.64758  | 1564.010531 | 1820.53288  |  |

|              |              |             |             |             |             |
|--------------|--------------|-------------|-------------|-------------|-------------|
| 1503.692988  |              |             |             |             |             |
| AP1S1        | AP1S1        | 551.7158886 | 202.1026596 | 112.4998249 |             |
| 140.4703795  |              |             |             |             |             |
| CTSD         | CTSD         | 9522.077407 | 13175.26534 | 8942.843222 |             |
| 8214.21756   |              |             |             |             |             |
| POU3F1       | POU3F1       | 65.59679355 | 24.3741901  | 24.99996108 |             |
| 6.599279573  |              |             |             |             |             |
| PC           | PC           | 773.1050669 | 1086.682642 | 538.3920191 |             |
| 541.140925   |              |             |             |             |             |
| IMPAD1       | IMPAD1       | 4037.716917 | 3503.789826 | 2400.88912  |             |
| 3030.954832  |              |             |             |             |             |
| OSGEP        | OSGEP        | 3159.188432 | 3485.509184 | 2734.817172 |             |
| 3293.983261  |              |             |             |             |             |
| LIME1        | LIME1        | 7713.480099 | 8979.857868 | 1244.64092  |             |
| 1955.272262  |              |             |             |             |             |
| HEATR2       | HEATR2       | 1290.851187 | 1167.929942 | 762.4988131 |             |
| 807.9403706  |              |             |             |             |             |
| FLVCR2       | FLVCR2       | 620.8267961 | 561.6219635 | 724.9988715 |             |
| 978.5788853  |              |             |             |             |             |
| RGS3         | RGS3         | 1902.307013 | 1241.052512 | 1194.640998 |             |
| 1460.326294  |              |             |             |             |             |
| 00EP         | 00EP         | 2.342742627 | 2.031182508 | 0           | 0.942754225 |
| RELN         | RELN         | 0           | 0           | 0           |             |
| GAS1         | GAS1         | 28.11291152 | 6.093547524 | 42.85707615 |             |
| 35.82466054  |              |             |             |             |             |
| TRIM23       | TRIM23       | 672.3671339 | 640.8380813 | 2145.532375 |             |
| 981.4071479  |              |             |             |             |             |
| LRRC43       | LRRC43       | 0           | 0           | 1.885508449 |             |
| MICAL3       | MICAL3       | 347.8972801 | 313.8176975 | 169.6425931 |             |
| 323.3646991  |              |             |             |             |             |
| JPH4         | JPH4         | 7.028227881 | 15.23386881 | 62.49990271 |             |
| 4.713771124  |              |             |             |             |             |
| KLHDC3       | KLHDC3       | 6792.782247 | 6891.80225  | 4992.849371 |             |
| 4765.622606  |              |             |             |             |             |
| APOBR        | APOBR        | 141.7359289 | 148.2763231 | 74.99988325 |             |
| 76.3630922   |              |             |             |             |             |
| TAF9B        | TAF9B        | 5963.451357 | 4736.717609 | 3836.601171 |             |
| 5711.205093  |              |             |             |             |             |
| POLR1D       | POLR1D       | 2861.660119 | 3009.196886 | 2976.781081 |             |
| 2710.418396  |              |             |             |             |             |
| PAM16        | PAM16        | 698.1373028 | 707.8671041 | 808.9273122 |             |
| 601.4771954  |              |             |             |             |             |
| MRPS23       | MRPS23       | 2837.061321 | 3996.351585 | 3065.1738   |             |
| 2925.366359  |              |             |             |             |             |
| LIG1         | LIG1         | 8948.105464 | 12817.77722 | 5676.776878 |             |
| 7029.175499  |              |             |             |             |             |
| LOC101928378 | LOC101928378 |             | 1231.11125  | 1596.509451 |             |
| 1894.639908  | 1561.200996  |             |             |             |             |
| DDX59        | DDX59        | 1642.262581 | 1699.084168 | 1559.819001 |             |
| 1663.961207  |              |             |             |             |             |

|             |          |               |               |               |
|-------------|----------|---------------|---------------|---------------|
| FAM63B      | FAM63B   | 1050.720068   | 1396.437974   | 1070.534048   |
| 1236.893543 |          |               |               |               |
| NDUFA2      | NDUFA2   | 4512.122299   | 4176.111237   | 2809.817055   |
| 3073.378773 |          |               |               |               |
| PDZD9       | PDZD9    | 4.685485254   | 10.15591254   | 0 1.885508449 |
| CEACAM4     | CEACAM4  | 1.171371313   | 0 20.53568232 | 3.771016899   |
| CD4         | CD4      | 22326.33723   | 23011.26663   | 9731.234852   |
| 16353.95754 |          |               |               |               |
| DGKH        | DGKH     | 951.1535065   | 845.9875146   | 478.5706836   |
| 520.400332  |          |               |               |               |
| OLFM4       | OLFM4    | 5.856856567   | 0 0           | 0             |
| SLC35A1     | SLC35A1  | 1308.421757   | 1732.598679   | 2114.282423   |
| 1787.46201  |          |               |               |               |
| ERICH2      | ERICH2   | 0 2.031182508 | 0             | 0             |
| TMPRSS3     | TMPRSS3  | 933.5829368   | 957.7025526   | 678.5703723   |
| 656.1569404 |          |               |               |               |
| ANKRD28     | ANKRD28  | 3551.597822   | 2707.566283   | 1978.568349   |
| 2361.599333 |          |               |               |               |
| SIRT6       | SIRT6    | 182.7339249   | 81.24730032   | 99.99984434   |
| 79.19135488 |          |               |               |               |
| DOC2A       | DOC2A    | 152.2782708   | 75.1537528    | 26.78567259   |
| 43.36669434 |          |               |               |               |
| ACTN4       | ACTN4    | 3200.186428   | 2048.447559   | 726.784583    |
| 1098.308672 |          |               |               |               |
| PDCD1       | PDCD1    | 3672.249068   | 2040.322829   | 1152.676777   |
| 3024.355553 |          |               |               |               |
| CCT6A       | CCT6A    | 20360.77617   | 24864.72067   | 17929.43638   |
| 21355.2687  |          |               |               |               |
| NDUFA4      | NDUFA4   | 16735.38196   | 16971.54545   | 11551.76773   |
| 12719.64    |          |               |               |               |
| RPL31       | RPL31    | 10727.41849   | 10263.56521   | 19394.61267   |
| 15102.92268 |          |               |               |               |
| ACTN1       | ACTN1    | 3987.347951   | 13015.81751   | 13547.30034   |
| 8675.224376 |          |               |               |               |
| PRPF4       | PRPF4    | 4184.138332   | 5373.493325   | 5139.277714   |
| 4212.225876 |          |               |               |               |
| NDUFA8      | NDUFA8   | 2731.637903   | 3714.017216   | 1748.211564   |
| 1936.417178 |          |               |               |               |
| ITPK1       | ITPK1    | 3694.505123   | 3408.324249   | 1841.961419   |
| 1945.84472  |          |               |               |               |
| FZD3        | FZD3     | 796.5324932   | 813.4885945   | 478.5706836   |
| 609.0192292 |          |               |               |               |
| RCBTB1      | RCBTB1   | 2976.454508   | 2569.445873   | 1689.283085   |
| 2162.678191 |          |               |               |               |
| DDX31       | DDX31    | 1006.207958   | 1184.179402   | 1458.9263     |
| 1238.779051 |          |               |               |               |
| PMFBP1      | PMFBP1   | 2.342742627   | 1.015591254   | 0 15.0840676  |
| CALCOC02    | CALCOC02 | 11452.66074   | 6533.909186   | 8369.487525   |
| 9140.944963 |          |               |               |               |
| C5orf45     | C5orf45  | 912.4982532   | 924.1880412   | 2110.711      |

|             |             |             |             |             |
|-------------|-------------|-------------|-------------|-------------|
| 1831.771459 |             |             |             |             |
| GOLGA8B     | GOLGA8B     | 816.4458055 | 306.7085587 | 360.7137242 |
| 683.4968129 |             |             |             |             |
| EIF2AK1     | EIF2AK1     | 14384.43973 | 18248.14365 | 10473.19798 |
| 11391.2993  |             |             |             |             |
| ATF7        | ATF7        | 1593.064986 | 1057.230495 | 965.177069  |
| 1481.066887 |             |             |             |             |
| PABPC1L     | PABPC1L     | 291.6714571 | 91.40321286 | 131.2497957 |
| 312.9944026 |             |             |             |             |
| HM13        | HM13        | 8019.208012 | 12333.34019 | 10340.16248 |
| 9315.354494 |             |             |             |             |
| MKRN3       | MKRN3       | 77.31050669 | 47.73278894 | 50.89277792 |
| 112.1877527 |             |             |             |             |
| NELFA       | NELFA       | 1951.504608 | 2069.774976 | 2362.496323 |
| 2373.855138 |             |             |             |             |
| UPF1        | UPF1        | 7972.353159 | 7735.758582 | 8181.237265 |
| 6749.177495 |             |             |             |             |
| CARD9       | CARD9       | 63.25405093 | 111.7150379 | 47.32135491 |
| 87.6761429  |             |             |             |             |
| CEP164      | CEP164      | 684.0808471 | 592.0897011 | 527.67775   |
| 562.8242722 |             |             |             |             |
| KIF3C       | KIF3C       | 270.5867734 | 100.5435342 | 187.4997081 |
| 173.4667773 |             |             |             |             |
| CIB1        | CIB1        | 6460.112794 | 8389.79935  | 8910.700415 |
| 7530.720747 |             |             |             |             |
| COX10       | COX10       | 4573.033608 | 5677.15511  | 1944.63983  |
| 2596.345135 |             |             |             |             |
| CLIC2       | CLIC2       | 11.71371313 | 69.06020528 | 102.6784116 |
| 45.25220279 |             |             |             |             |
| PSMB9       | PSMB9       | 125.3367305 | 20.31182508 | 29.46423985 |
| 223.4327513 |             |             |             |             |
| PMCH        | PMCH        | 728.592957  | 1091.760598 | 298.2138215 |
| 398.7850371 |             |             |             |             |
| GMFB        | GMFB        | 4279.019408 | 3623.629594 | 3162.495077 |
| 4124.549733 |             |             |             |             |
| TJP2        | TJP2        | 5088.436986 | 3905.963963 | 836.6058406 |
| 1686.587308 |             |             |             |             |
| TMEM136     | TMEM136     | 18.74194102 | 17.26505132 | 14.28569205 |
| 21.68334717 |             |             |             |             |
| PPAN-P2RY11 | PPAN-P2RY11 |             | 5116.549897 | 5931.052924 |
| 5198.206194 | 5207.774337 |             |             |             |
| LOH12CR2    | LOH12CR2    |             | 32.79839678 | 25.38978135 |
| 24.99996108 | 26.39711829 |             |             |             |
| LTB4R       | LTB4R       | 347.8972801 | 186.8687907 | 309.8209463 |
| 329.0212244 |             |             |             |             |
| SEC24A      | SEC24A      | 4720.626393 | 3669.331201 | 2572.317424 |
| 2932.908393 |             |             |             |             |
| NR4A1       | NR4A1       | 1855.452161 | 3009.196886 | 4508.921553 |
| 4469.597779 |             |             |             |             |
| IMPA1       | IMPA1       | 3196.672314 | 2858.88938  | 2429.460504 |

|             |          |             |             |             |             |
|-------------|----------|-------------|-------------|-------------|-------------|
| 2533.180602 |          |             |             |             |             |
| NCKAP1      | NCKAP1   | 182.7339249 | 42.65483267 | 249.1067551 |             |
| 358.2466054 |          |             |             |             |             |
| CCDC113     | CCDC113  | 30.45565415 | 46.71719769 | 34.82137437 |             |
| 24.51160984 |          |             |             |             |             |
| TNP02       | TNP02    | 1169.028571 | 537.2477734 | 498.2135102 |             |
| 613.7330003 |          |             |             |             |             |
| KLRC4       | KLRC4    | 0           | 15.23386881 | 83.92844078 | 0           |
| EFHD2       | EFHD2    | 9262.032976 | 9702.958841 | 4774.099711 |             |
| 6044.940089 |          |             |             |             |             |
| EMC3        | EMC3     | 3637.107928 | 5215.06109  | 3497.315985 |             |
| 3092.233857 |          |             |             |             |             |
| ZNF239      | ZNF239   | 24.59879758 | 5.07795627  | 249.9996108 |             |
| 279.0552505 |          |             |             |             |             |
| MAPK6       | MAPK6    | 4814.336098 | 4748.904704 | 2004.461166 |             |
| 2640.654583 |          |             |             |             |             |
| ZNHIT3      | ZNHIT3   | 2865.174233 | 3487.540366 | 3307.137709 |             |
| 2685.906786 |          |             |             |             |             |
| NR0B2       | NR0B2    | 3.51411394  | 4.062365016 | 7.142846024 | 0           |
| SNORD51     | SNORD51  | 3.51411394  | 5.07795627  | 8.035701777 |             |
| 0.942754225 |          |             |             |             |             |
| MIR6764     | MIR6764  | 10.54234182 | 6.093547524 | 31.24995136 |             |
| 15.0840676  |          |             |             |             |             |
| MIR6763     | MIR6763  | 4.685485254 | 0           | 0           | 0           |
| MIR6762     | MIR6762  | 0           | 2.678567259 | 4.713771124 |             |
| MIR6761     | MIR6761  | 0           | 0.892855753 | 0           |             |
| EHF         | EHF      | 0           | 8.035701777 | 0           |             |
| MGST2       | MGST2    | 986.2946459 | 1142.540161 | 259.8210241 |             |
| 515.6865609 |          |             |             |             |             |
| ADAT1       | ADAT1    | 1493.498425 | 1879.859411 | 2183.032316 |             |
| 1762.007646 |          |             |             |             |             |
| DNPEP       | DNPEP    | 3635.936557 | 4348.76175  | 5999.99066  |             |
| 4954.173451 |          |             |             |             |             |
| CABYR       | CABYR    | 10.54234182 | 12.18709505 | 111.6069691 |             |
| 170.6385147 |          |             |             |             |             |
| B3GAT3      | B3GAT3   | 2793.720583 | 2706.550692 | 2326.782092 |             |
| 2574.661788 |          |             |             |             |             |
| C4orf26     | C4orf26  | 203.8186085 | 178.7440607 | 26.78567259 |             |
| 351.6473258 |          |             |             |             |             |
| SNX24       | SNX24    | 175.705697  | 258.9757698 | 97.32127708 |             |
| 183.8370738 |          |             |             |             |             |
| DESI1       | DESI1    | 4212.251243 | 5363.337413 | 2233.032238 |             |
| 3292.097753 |          |             |             |             |             |
| ARHGEF17    | ARHGEF17 |             | 0           | 0           | 9.821413283 |
| 11.3130507  |          |             |             |             |             |
| ORAI3       | ORAI3    | 1249.853191 | 1826.033075 | 891.9628973 |             |
| 871.1049036 |          |             |             |             |             |
| ARRDC1      | ARRDC1   | 2694.154021 | 2743.111977 | 2841.959862 |             |
| 2902.740258 |          |             |             |             |             |
| RPS29       | RPS29    | 8944.59135  | 7376.239278 | 11661.58899 |             |

|              |              |             |             |             |   |
|--------------|--------------|-------------|-------------|-------------|---|
| 9803.701183  |              |             |             |             |   |
| GAGE10       | GAGE10       | 0           | 1.015591254 | 8.035701777 | 0 |
| AMOT         | AMOT         | 16.39919839 | 19.29623383 | 46.42849916 |   |
| 108.4167358  |              |             |             |             |   |
| SAMD13       | SAMD13       | 8.199599194 | 5.07795627  | 8.92855753  |   |
| 6.599279573  |              |             |             |             |   |
| ZNF213       | ZNF213       | 841.0446031 | 692.6332353 | 653.5704112 |   |
| 511.915544   |              |             |             |             |   |
| CTNNB1       | CTNNB1       | 7497.947777 | 10470.74583 | 8734.807832 |   |
| 7344.055411  |              |             |             |             |   |
| MBOAT4       | MBOAT4       | 30.45565415 | 26.40537261 | 68.74989298 |   |
| 74.47758375  |              |             |             |             |   |
| MEX3A        | MEX3A        | 1.171371313 | 3.046773762 | 0.892855753 |   |
| 2.828262674  |              |             |             |             |   |
| KIFC3        | KIFC3        | 3.51411394  | 3.046773762 | 25.89281684 |   |
| 34.88190631  |              |             |             |             |   |
| PSMA4        | PSMA4        | 18678.68696 | 20812.51157 | 12286.58802 |   |
| 14106.43146  |              |             |             |             |   |
| KRT37        | KRT37        | 0           | 0           | 2.828262674 |   |
| SARS         | SARS         | 9360.428166 | 15102.85754 | 22753.53601 |   |
| 14844.60802  |              |             |             |             |   |
| ZBTB38       | ZBTB38       | 2397.797079 | 3446.916716 | 4344.636094 |   |
| 4694.916039  |              |             |             |             |   |
| SSBP3-AS1    | SSBP3-AS1    |             | 49.19759517 | 18.28064257 |   |
| 39.28565313  | 41.48118589  |             |             |             |   |
| IBA57-AS1    | IBA57-AS1    |             | 5.856856567 | 1.015591254 |   |
| 19.64282657  | 0.942754225  |             |             |             |   |
| SLC26A11     | SLC26A11     |             | 544.6876608 | 366.6284427 |   |
| 868.7486477  | 638.2446101  |             |             |             |   |
| SLC41A3      | SLC41A3      | 1053.062811 | 1126.290701 | 1407.140667 |   |
| 1250.092102  |              |             |             |             |   |
| ZDHHC15      | ZDHHC15      | 22.25605496 | 17.26505132 | 57.14276819 |   |
| 40.53843166  |              |             |             |             |   |
| FOXO6        | FOXO6        | 1.171371313 | 0           | 2.678567259 | 0 |
| LOC101929057 | LOC101929057 |             | 206.1613512 | 190.9311558 |   |
| 199.1068329  | 181.9515654  |             |             |             |   |
| BCAP31       | BCAP31       | 8089.490291 | 11950.46229 | 10040.16294 |   |
| 8036.979766  |              |             |             |             |   |
| PRSS21       | PRSS21       | 67.93953618 | 534.2009996 | 260.7138799 |   |
| 88.61889712  |              |             |             |             |   |
| F2RL2        | F2RL2        | 81.99599194 | 36.56128515 | 30.3570956  |   |
| 37.71016899  |              |             |             |             |   |
| E2F2         | E2F2         | 7319.899338 | 4592.503651 | 738.3917078 |   |
| 1077.568079  |              |             |             |             |   |
| WDR4         | WDR4         | 1377.532665 | 2050.478742 | 1137.498229 |   |
| 1174.671764  |              |             |             |             |   |
| ARHGEF40     | ARHGEF40     |             | 5.856856567 | 6.093547524 |   |
| 16.96425931  | 20.74059294  |             |             |             |   |
| BCKDHB       | BCKDHB       | 1138.572917 | 1266.442294 | 843.7486866 |   |
| 884.3034628  |              |             |             |             |   |



|             |             |             |             |             |             |   |
|-------------|-------------|-------------|-------------|-------------|-------------|---|
| NRP2        | NRP2        | 78.481878   | 229.5236234 | 75.89273901 |             |   |
| 60.33627038 |             |             |             |             |             |   |
| RNF6        | RNF6        | 6344.147034 | 6757.744204 | 6894.632125 |             |   |
| 7175.302404 |             |             |             |             |             |   |
| DNAJC12     | DNAJC12     | 48.02622385 | 219.3677109 | 110.7141134 |             |   |
| 44.30944856 |             |             |             |             |             |   |
| DEPDC4      | DEPDC4      | 72.62502143 | 34.53010264 | 29.46423985 |             |   |
| 83.905126   |             |             |             |             |             |   |
| NXPE1       | NXPE1       | 0           | 0           | 1.785711506 | 6.599279573 |   |
| TCTEX1D2    | TCTEX1D2    |             |             | 762.5627251 | 746.4595717 |   |
| 377.6779835 | 472.3198666 |             |             |             |             |   |
| C19orf26    | C19orf26    |             | 1.171371313 | 0           | 2.678567259 |   |
| 0           |             |             |             |             |             |   |
| FAM69A      | FAM69A      | 3045.565415 | 4300.01337  | 3180.352192 |             |   |
| 2716.074921 |             |             |             |             |             |   |
| ENTPD5      | ENTPD5      | 514.2320066 | 524.0450871 | 454.4635783 |             |   |
| 411.9835962 |             |             |             |             |             |   |
| SPATA25     | SPATA25     | 0           | 4.062365016 | 6.249990271 | 13.19855915 |   |
| CRTC1       | CRTC1       | 32.79839678 | 32.49892013 | 63.39275847 |             |   |
| 65.99279573 |             |             |             |             |             |   |
| ZNF717      | ZNF717      | 60.9113083  | 70.07579653 | 99.10698859 |             |   |
| 173.4667773 |             |             |             |             |             |   |
| CAMKK2      | CAMKK2      | 3361.83567  | 3091.459777 | 2085.711039 |             |   |
| 2277.694207 |             |             |             |             |             |   |
| STAM2       | STAM2       | 1345.905639 | 1450.264311 | 1833.032861 |             |   |
| 1390.562481 |             |             |             |             |             |   |
| BAGE3       | BAGE3       | 0           | 0           | 0.942754225 |             |   |
| SERPINI2    | SERPINI2    |             |             | 1.015591254 | 0           | 0 |
| ADCY3       | ADCY3       | 3512.942569 | 3508.867783 | 1624.997471 |             |   |
| 2252.239843 |             |             |             |             |             |   |
| TOP3B       | TOP3B       | 2045.214313 | 1915.405105 | 1948.211253 |             |   |
| 2213.58692  |             |             |             |             |             |   |
| FUBP3       | FUBP3       | 3646.478899 | 3736.360224 | 3642.851472 |             |   |
| 3389.201438 |             |             |             |             |             |   |
| FBXW2       | FBXW2       | 4625.745317 | 3895.808051 | 3352.673353 |             |   |
| 3199.707839 |             |             |             |             |             |   |
| RBMS2       | RBMS2       | 125.3367305 | 86.32525659 | 91.07128681 |             |   |
| 134.8138541 |             |             |             |             |             |   |
| TRAM2       | TRAM2       | 462.6916688 | 639.8224901 | 1043.748375 |             |   |
| 742.8903291 |             |             |             |             |             |   |
| TFF1        | TFF1        | 0           | 1.015591254 | 0           | 0           |   |
| TDG         | TDG         | 3576.19662  | 3454.025855 | 1958.925522 |             |   |
| 2382.339926 |             |             |             |             |             |   |
| NEK4        | NEK4        | 1575.494417 | 1694.006212 | 1983.925483 |             |   |
| 1764.835909 |             |             |             |             |             |   |
| COCH        | COCH        | 65.59679355 | 82.26289158 | 6.249990271 |             |   |
| 38.65292321 |             |             |             |             |             |   |
| TIMM8A      | TIMM8A      | 741.4780414 | 895.7514861 | 712.4988909 |             |   |
| 703.2946516 |             |             |             |             |             |   |
| CEP68       | CEP68       | 1607.121442 | 2104.305078 | 4061.600821 |             |   |

|             |             |             |             |             |             |
|-------------|-------------|-------------|-------------|-------------|-------------|
| 2498.298695 |             |             |             |             |             |
| KIF18A      | KIF18A      | 2026.472372 | 1719.395993 | 562.4991244 |             |
| 1452.78426  |             |             |             |             |             |
| CABLES2     | CABLES2     | 2029.986486 | 2590.773289 | 1166.069613 |             |
| 1216.15295  |             |             |             |             |             |
| ABHD17A     | ABHD17A     | 5527.701228 | 6171.748051 | 3651.78003  |             |
| 4152.83236  |             |             |             |             |             |
| GALNT14     | GALNT14     | 19.91331233 | 6.093547524 | 0           | 26.39711829 |
| ANKRD36BP1  | ANKRD36BP1  |             | 242.4738619 | 44.68601518 |             |
| 58.03562395 | 81.07686333 |             |             |             |             |
| SERINC4     | SERINC4     | 576.3146862 | 774.8961268 | 1269.640881 |             |
| 1207.668162 |             |             |             |             |             |
| HIST1H2BB   | HIST1H2BB   |             | 117.1371313 | 51.79515396 |             |
| 17.85711506 | 39.59567744 |             |             |             |             |
| CCNC        | CCNC        | 4715.940908 | 4701.171915 | 3313.387699 |             |
| 3868.120584 |             |             |             |             |             |
| ZNF507      | ZNF507      | 1166.685828 | 795.2079519 | 1359.819312 |             |
| 1702.61413  |             |             |             |             |             |
| ZFP30       | ZFP30       | 233.1028914 | 200.071477  | 485.7135296 |             |
| 358.2466054 |             |             |             |             |             |
| UBE2S       | UBE2S       | 12079.18098 | 19378.49672 | 6656.239639 |             |
| 7019.747957 |             |             |             |             |             |
| MDH2        | MDH2        | 14779.19186 | 23813.58373 | 12486.58771 |             |
| 12740.38059 |             |             |             |             |             |
| RAB30       | RAB30       | 376.0101916 | 327.0203838 | 597.3204988 |             |
| 651.4431693 |             |             |             |             |             |
| RBMS3       | RBMS3       | 37.48388203 | 41.63924142 | 30.3570956  |             |
| 39.59567744 |             |             |             |             |             |
| TIMM22      | TIMM22      | 2111.982478 | 3215.36191  | 2880.352659 |             |
| 2355.942808 |             |             |             |             |             |
| FGF13       | FGF13       | 0           | 4.464278765 | 0           |             |
| CTC-360P9.3 | CTC-360P9.3 |             | 0           | 0           | 0.942754225 |
| PYGL        | PYGL        | 5.856856567 | 10.15591254 | 0           | 8.484788022 |
| FUT3        | FUT3        | 0           | 0.892855753 | 0           |             |
| RABEPK      | RABEPK      | 1810.940051 | 2426.247506 | 2062.49679  |             |
| 1794.06129  |             |             |             |             |             |
| CBWD1       | CBWD1       | 1300.222158 | 1591.431495 | 1296.426553 |             |
| 1531.975615 |             |             |             |             |             |
| MKLN1       | MKLN1       | 3696.847865 | 3183.878581 | 4035.708004 |             |
| 4611.953667 |             |             |             |             |             |
| KDM8        | KDM8        | 631.369138  | 588.0273361 | 358.035157  |             |
| 461.0068159 |             |             |             |             |             |
| HSPA4L      | HSPA4L      | 28.11291152 | 77.18493531 | 133.928363  |             |
| 19.79783872 |             |             |             |             |             |
| ACP1        | ACP1        | 7251.959802 | 8252.69453  | 8196.415813 |             |
| 7447.758375 |             |             |             |             |             |
| TUFT1       | TUFT1       | 308.0706554 | 375.768764  | 841.0701194 |             |
| 514.7438067 |             |             |             |             |             |
| ZNF77       | ZNF77       | 261.2158029 | 135.0736368 | 376.7851278 |             |
| 606.1909665 |             |             |             |             |             |

|              |              |             |             |             |             |
|--------------|--------------|-------------|-------------|-------------|-------------|
| PHF20L1      | PHF20L1      | 3761.273288 | 3754.640866 | 4072.31509  |             |
| 3838.895203  |              |             |             |             |             |
| LOC101929231 | LOC101929231 | 514.2849137 | 692.2804463 | 935.359545  |             |
| 485.5184257  |              |             |             |             |             |
| LOC101928371 | LOC101928371 | 805.3558892 | 713.3651299 | 711.9294691 |             |
| 736.2910495  |              |             |             |             |             |
| LOC101928222 | LOC101928222 | 4.713771124 | 5.856856567 | 0           | 2.678567259 |
|              |              |             |             |             |             |
| LOC101927492 | LOC101927492 | 779.4630724 | 687.594961  | 1040.981035 |             |
| 735.3482953  |              |             |             |             |             |
| LOC101927482 | LOC101927482 | 832.1415618 | 640.7401085 | 1057.230495 |             |
| 694.8098636  |              |             |             |             |             |
| LOC101927431 | LOC101927431 |             | 0           | 3.571423012 | 0           |
| ELMOD2       | ELMOD2       | 1213.540681 | 1027.778349 | 1205.355267 |             |
| 1392.44799   |              |             |             |             |             |
| TMEM219      | TMEM219      | 2742.180245 | 3163.566756 | 3168.745068 |             |
| 3122.401992  |              |             |             |             |             |
| CEP162       | CEP162       | 548.2017747 | 353.4257564 | 1016.069847 |             |
| 694.8098636  |              |             |             |             |             |
| NPLOC4       | NPLOC4       | 13334.89103 | 18223.76946 | 11463.37501 |             |
| 10954.80409  |              |             |             |             |             |
| CCNJL        | CCNJL        | 0           | 4.062365016 | 0           | 0           |
| MS4A7        | MS4A7        | 0           | 0           | 4.713771124 |             |
| PRDM15       | PRDM15       | 852.7583162 | 608.3391612 | 577.6776722 |             |
| 710.8366854  |              |             |             |             |             |
| GNG3         | GNG3         | 171.0202118 | 187.884382  | 235.7139188 |             |
| 197.9783872  |              |             |             |             |             |
| NAT6         | NAT6         | 515.4033779 | 539.2789559 | 591.9633643 |             |
| 559.9960095  |              |             |             |             |             |
| JAKMIP2      | JAKMIP2      | 127.6794732 | 101.5591254 | 21.42853807 |             |
| 131.0428372  |              |             |             |             |             |
| COPZ2        | COPZ2        | 121.8226166 | 121.8709505 | 111.6069691 |             |
| 75.42033798  |              |             |             |             |             |
| SENP6        | SENP6        | 3945.178584 | 3531.21079  | 4557.135763 |             |
| 5008.853196  |              |             |             |             |             |
| ISCU         | ISCU         | 5997.421125 | 6635.873254 | 13199.0866  |             |
| 8827.95056   |              |             |             |             |             |
| STX17        | STX17        | 1553.238362 | 1487.841187 | 2384.817716 |             |
| 2717.96043   |              |             |             |             |             |
| RNF34        | RNF34        | 8088.318919 | 10604.80387 | 7670.523774 |             |
| 7930.448538  |              |             |             |             |             |
| FAM169A      | FAM169A      | 809.4175776 | 670.2902277 | 1034.819818 |             |
| 1323.626932  |              |             |             |             |             |
| LTN1         | LTN1         | 3611.337759 | 2687.254458 | 2539.281762 |             |
| 2610.486448  |              |             |             |             |             |
| LOC283856    | LOC283856    |             | 0           | 9.821413283 |             |
| 2.828262674  |              |             |             |             |             |
| RCOR3        | RCOR3        | 1928.077182 | 1699.084168 | 2124.103836 |             |
| 2128.739039  |              |             |             |             |             |
| P4HA1        | P4HA1        | 1741.829143 | 1684.86589  | 2226.782248 |             |

|              |              |             |             |             |
|--------------|--------------|-------------|-------------|-------------|
| 2235.270267  |              |             |             |             |
| KIAA0430     | KIAA0430     | 2578.188261 | 1445.186355 |             |
| 2445.531908  | 2246.583317  |             |             |             |
| SLC52A2      | SLC52A2      | 3742.531347 | 6397.209309 | 3666.958578 |
| 3053.580934  |              |             |             |             |
| STXBP2       | STXBP2       | 6109.872771 | 6093.547524 | 4197.314895 |
| 4825.958876  |              |             |             |             |
| MYRF         | MYRF         | 57.39719436 | 50.7795627  | 33.92851862 |
| 103.7029647  |              |             |             |             |
| YIF1A        | YIF1A        | 3060.793242 | 4105.019849 | 3497.315985 |
| 2841.461233  |              |             |             |             |
| ZCWPW2       | ZCWPW2       | 5.856856567 | 13.2026863  | 66.07132572 |
| 31.11088942  |              |             |             |             |
| PRKAR1A      | PRKAR1A      | 23141.61167 | 23127.04404 | 19639.25514 |
| 23846.02536  |              |             |             |             |
| LOC101929441 | LOC101929441 | 0           | 3.046773762 | 74.1070275  |
| 40.53843166  |              |             |             |             |
| NSL1         | NSL1         | 3473.115944 | 3120.911924 | 2971.423946 |
| 3458.022496  |              |             |             |             |
| GSK3A        | GSK3A        | 2338.057142 | 1195.350906 | 1005.355578 |
| 919.1853691  |              |             |             |             |
| GMNN         | GMNN         | 5583.927051 | 6125.030853 | 2360.710611 |
| 3056.409197  |              |             |             |             |
| TRIM24       | TRIM24       | 1917.53484  | 1794.549746 | 2078.568193 |
| 1914.73383   |              |             |             |             |
| MCM5         | MCM5         | 26428.47957 | 35765.0616  | 11892.83863 |
| 15046.35743  |              |             |             |             |
| C11orf52     | C11orf52     | 0           | 3.046773762 | 3.571423012 |
| 4.713771124  |              |             |             |             |
| ZNF689       | ZNF689       | 1712.54486  | 2022.042187 | 2576.781703 |
| 1857.225823  |              |             |             |             |
| FPGT-TNNI3K  | FPGT-TNNI3K  | 156.963756  | 160.4634181 |             |
| 140.1783532  | 192.3218618  |             |             |             |
| MOCOS        | MOCOS        | 0           | 7.109138778 | 4.464278765 |
| KIF1C        | KIF1C        | 1786.341253 | 1411.671843 | 13.19855915 |
| 1762.9504    |              |             |             |             |
| SND1         | SND1         | 12831.20137 | 18412.66944 | 14119.62088 |
| 13803.80736  |              |             |             |             |
| PELP1        | PELP1        | 1372.847179 | 519.9827221 | 501.7849332 |
| 631.6453306  |              |             |             |             |
| CCSAP        | CCSAP        | 838.7018604 | 477.3278894 | 771.4273706 |
| 964.4375719  |              |             |             |             |
| LRR3C        | LRR3C        | 1.171371313 | 0           | 4.464278765 |
| CHMP5        | CHMP5        | 5315.68302  | 5615.204044 | 0           |
| 5702.720305  |              |             |             | 6690.168157 |
| SLC35B1      | SLC35B1      | 3854.982993 | 4945.929407 | 2564.281723 |
| 2838.632971  |              |             |             |             |
| CENPH        | CENPH        | 1460.700028 | 1470.576136 | 1037.498385 |
| 1375.478414  |              |             |             |             |
| CCDC14       | CCDC14       | 1142.087031 | 657.0875414 | 800.8916105 |

|             |             |             |             |             |   |
|-------------|-------------|-------------|-------------|-------------|---|
| 892.7882508 |             |             |             |             |   |
| CAPNS1      | CAPNS1      | 4737.025592 | 1464.482588 | 862.4986574 |   |
| 1172.786256 |             |             |             |             |   |
| CAPN2       | CAPN2       | 21246.33288 | 23791.24072 | 8712.486438 |   |
| 10686.11914 |             |             |             |             |   |
| RAPGEF4     | RAPGEF4     | 4.685485254 | 3.046773762 | 24.99996108 |   |
| 9.427542247 |             |             |             |             |   |
| EPHX3       | EPHX3       | 0           | 1.015591254 | 0           |   |
| COMMD7      | COMMD7      | 3979.148352 | 5678.170701 | 3120.530857 |   |
| 3075.264281 |             |             |             |             |   |
| NT5C3B      | NT5C3B      | 1289.679816 | 3382.934467 | 2575.888847 |   |
| 1680.930783 |             |             |             |             |   |
| AKTIP       | AKTIP       | 2972.940394 | 2957.401732 | 2822.317035 |   |
| 2804.693819 |             |             |             |             |   |
| MINOS1-NBL1 | MINOS1-NBL1 |             | 1887.079186 | 2048.447559 |   |
| 2092.853885 |             | 1721.469214 |             |             |   |
| AK4         | AK4         | 682.9094757 | 663.1810889 | 963.3913575 |   |
| 1169.015239 |             |             |             |             |   |
| MAFB        | MAFB        | 33.96976809 | 37.5768764  | 13.3928363  |   |
| 8.484788022 |             |             |             |             |   |
| ZNF263      | ZNF263      | 2452.85153  | 2905.606578 | 5465.170064 |   |
| 3636.203045 |             |             |             |             |   |
| DNAL4       | DNAL4       | 380.6956769 | 467.1719769 | 494.6420872 |   |
| 358.2466054 |             |             |             |             |   |
| SPRY4       | SPRY4       | 0           | 5.07795627  | 1.785711506 | 0 |
| PTPN3       | PTPN3       | 673.5385052 | 344.2854351 | 20.53568232 |   |
| 402.556054  |             |             |             |             |   |
| SMTNL1      | SMTNL1      | 44.51210991 | 51.79515396 | 336.6066189 |   |
| 218.7189801 |             |             |             |             |   |
| MAP3K9      | MAP3K9      | 297.5283136 | 375.768764  | 375.892272  |   |
| 204.5776668 |             |             |             |             |   |
| MIR503HG    | MIR503HG    |             | 8.199599194 | 1.015591254 | 0 |
| 2.828262674 |             |             |             |             |   |
| ZCCHC18     | ZCCHC18     | 40.99799597 | 33.51451138 | 192.8568427 |   |
| 144.2413964 |             |             |             |             |   |
| CD24        | CD24        | 5.856856567 | 9.140321286 | 0           | 0 |
| CDKN2A      | CDKN2A      | 1101.089035 | 5192.718082 | 532.1420288 |   |
| 334.6777498 |             |             |             |             |   |
| CDK4        | CDK4        | 9340.514854 | 10847.53018 | 9115.164383 |   |
| 9827.270038 |             |             |             |             |   |
| CD40LG      | CD40LG      | 5540.586313 | 10448.40282 | 5374.098777 |   |
| 5724.403652 |             |             |             |             |   |
| SLC30A7     | SLC30A7     | 3350.121956 | 2553.196413 | 3482.137437 |   |
| 3103.546908 |             |             |             |             |   |
| PRICKLE1    | PRICKLE1    |             | 36.31251072 | 88.3564391  | 0 |
| 0           |             |             |             |             |   |
| MGRN1       | MGRN1       | 1485.298825 | 619.510665  | 472.3206934 |   |
| 613.7330003 |             |             |             |             |   |
| C21orf58    | C21orf58    |             | 715.7078725 | 500.6864882 |   |
| 292.856687  |             | 279.9980047 |             |             |   |

|             |             |             |             |             |
|-------------|-------------|-------------|-------------|-------------|
| ZBTB21      | ZBTB21      | 931.2401942 | 598.1832486 | 1967.85408  |
| 1614.937987 |             |             |             |             |
| TFAP2D      | TFAP2D      | 1.171371313 | 0           | 0.942754225 |
| KREMEN2     | KREMEN2     | 96.0524477  | 49.76397145 | 21.42853807 |
| 45.25220279 |             |             |             |             |
| ACAN        | ACAN        | 2.342742627 | 12.18709505 | 8.92855753  |
| 25.45436407 |             |             |             |             |
| TTC24       | TTC24       | 189.7621528 | 43.67042392 | 65.17846997 |
| 134.8138541 |             |             |             |             |
| VDAC3       | VDAC3       | 18549.83612 | 28371.55727 | 12525.87336 |
| 12038.0287  |             |             |             |             |
| HHIPL1      | HHIPL1      | 0           | 10.71426904 | 1.885508449 |
| ELK1        | ELK1        | 2916.714571 | 1895.09328  | 1473.211993 |
| 1746.923578 |             |             |             |             |
| HGC6.3      | HGC6.3      | 0           | 2.678567259 | 0           |
| FAM196B     | FAM196B     | 14.05645576 | 11.17150379 | 8.035701777 |
| 13.19855915 |             |             |             |             |
| LRRC69      | LRRC69      | 36.31251072 | 19.29623383 | 41.96422039 |
| 63.16453306 |             |             |             |             |
| DCT         | DCT         | 5.856856567 | 1.015591254 | 16.96425931 |
| 13.19855915 |             |             |             |             |
| CYHR1       | CYHR1       | 800.0466071 | 1167.929942 | 1490.176252 |
| 1171.843501 |             |             |             |             |
| DHRS2       | DHRS2       | 9.370970508 | 136.089228  | 826.7844273 |
| 0.942754225 |             |             |             |             |
| INPPL1      | INPPL1      | 2479.793071 | 753.5687105 | 815.1773025 |
| 984.2354106 |             |             |             |             |
| PPP5C       | PPP5C       | 5428.134667 | 6499.784026 | 3776.779835 |
| 4015.190243 |             |             |             |             |
| LRRC37A     | LRRC37A     | 48.02622385 | 24.3741901  | 67.85703723 |
| 97.10368515 |             |             |             |             |
| CCDC96      | CCDC96      | 57.39719436 | 74.13816155 | 68.74989298 |
| 65.05004151 |             |             |             |             |
| LNx2        | LNx2        | 1010.893444 | 1015.591254 | 949.9985212 |
| 935.2121909 |             |             |             |             |
| OSBPL5      | OSBPL5      | 139.3931863 | 10.15591254 | 200.8925444 |
| 138.584871  |             |             |             |             |
| PRPSAP2     | PRPSAP2     | 1643.433953 | 1943.84166  | 1748.211564 |
| 1557.429979 |             |             |             |             |
| UBXN8       | UBXN8       | 305.7279128 | 430.6106917 | 188.3925639 |
| 204.5776668 |             |             |             |             |
| SLC25A14    | SLC25A14    |             | 621.9981674 | 629.6665775 |
| 507.1420677 | 431.7814349 |             |             |             |
| N4BP2L2     | N4BP2L2     | 4751.082047 | 3475.353271 | 7766.05934  |
| 8445.192345 |             |             |             |             |
| KCNMB4      | KCNMB4      | 49.19759517 | 25.38978135 | 140.1783532 |
| 48.08046546 |             |             |             |             |
| PRPF38A     | PRPF38A     | 7407.752186 | 8439.563321 | 7066.953285 |
| 6693.554995 |             |             |             |             |
| CADM4       | CADM4       | 4.685485254 | 0           | 4.464278765 |
|             |             |             |             | 6.599279573 |

|             |             |             |             |
|-------------|-------------|-------------|-------------|
| C10orf35    | C10orf35    | 158.1351273 | 287.4123249 |
| 983.9270398 | 627.8743137 |             |             |
| HIST2H4B    | HIST2H4B    | 0           | 0           |
| 0.942754225 |             |             | 1.785711506 |
| MICALL2     | MICALL2     | 12.88508445 | 17.26505132 |
| 93.33266825 |             |             | 61.60704696 |
| MBP         | MBP         | 8825.111476 | 4908.352531 |
| 9619.864109 |             |             | 7316.952896 |
| PLEKHH3     | PLEKHH3     | 30.45565415 | 86.32525659 |
| 12.25580492 |             |             | 34.82137437 |
| PPP1R14B    | PPP1R14B    |             | 3817.499111 |
| 5014.277909 | 3731.421221 |             | 6757.744204 |
| ZNF606      | ZNF606      | 392.40939   | 290.4590987 |
| 701.4091432 |             |             | 746.4274095 |
| PLCXD3      | PLCXD3      | 0           | 0           |
| ANKRD34A    | ANKRD34A    |             | 3.571423012 |
| 84.82129654 | 98.04643937 |             | 62.08267961 |
| MECP2       | MECP2       | 1480.61334  | 1117.150379 |
| 1263.290661 |             |             | 1643.747441 |
| HIF1A       | HIF1A       | 15182.14359 | 11200.95594 |
| 25101.77399 |             |             | 16709.79542 |
| TSPAN4      | TSPAN4      | 427.5505294 | 490.5305757 |
| 224.3755055 |             |             | 162.4997471 |
| CLLU10S     | CLLU10S     | 0           | 0           |
| CHI3L2      | CHI3L2      | 219.0464356 | 198.0402945 |
| 435.5524518 |             |             | 4.713771124 |
| VMAC        | VMAC        | 241.3024906 | 176.7128782 |
| 252.6581322 |             |             | 251.7853224 |
| RASSF5      | RASSF5      | 29695.43417 | 39133.77779 |
| 27679.26404 |             |             | 23567.82046 |
| CREM        | CREM        | 4909.217175 | 8893.532612 |
| 6831.197112 |             |             | 6376.775788 |
| FILIP1L     | FILIP1L     | 119.479874  | 321.9424275 |
| 74.47758375 |             |             | 8.035701777 |
| TMEM191B    | TMEM191B    |             | 3.51411394  |
| 19.64282657 | 4.713771124 |             | 9.140321286 |
| FAM131C     | FAM131C     | 19.91331233 | 18.28064257 |
| 14.14131337 |             |             | 142.8569205 |
| WASH1       | WASH1       | 248.3307185 | 115.777403  |
| 152.7261844 |             |             | 141.9640647 |
| STRA8       | STRA8       | 2.342742627 | 0           |
| ZFP2        | ZFP2        | 0           | 0           |
| PPFIBP2     | PPFIBP2     | 131.1935871 | 358.5037127 |
| 516.6293151 |             |             | 1908.9256   |
| TMEM204     | TMEM204     | 2783.178241 | 3054.898492 |
| 2309.747851 |             |             | 2533.031771 |
| APOL4       | APOL4       | 50.36896648 | 359.5193039 |
| 11.3130507  |             |             | 56.24991244 |
| MIR4678     | MIR4678     | 0           | 0           |
| MIR4677     | MIR4677     | 1.171371313 | 2.031182508 |
|             |             |             | 1.885508449 |
|             |             |             | 2.678567259 |

|             |          |             |   |             |
|-------------|----------|-------------|---|-------------|
| 0.942754225 |          |             |   |             |
| MIR4676     | MIR4676  | 0           | 0 | 0.892855753 |
| 0           |          |             |   | 0           |
| WNK2        | WNK2     | 4.685485254 |   | 1.015591254 |
| 0           |          |             |   | 0           |
| HIST1H1E    | HIST1H1E |             |   | 2293.545032 |
| 1576.78326  |          | 781.5432523 |   | 1580.259991 |
| ZNF232      | ZNF232   | 554.0586313 |   | 601.2300224 |
| 1114.335494 |          |             |   | 1215.17668  |
| CNOT3       | CNOT3    | 1576.665788 |   | 858.1746097 |
| 855.0780818 |          |             |   | 818.7487255 |
| DECR1       | DECR1    | 6376.94543  |   | 6214.402884 |
| 4117.950454 |          |             |   | 2453.567609 |
| DHX15       | DHX15    | 16412.08347 |   | 16476.95251 |
| 14153.56918 |          |             |   | 12438.3735  |
| TNFSF14     | TNFSF14  | 1197.141482 |   | 1327.377769 |
| 2491.699416 |          |             |   | 2124.996692 |
| MRPL36      | MRPL36   | 2435.280961 |   | 2714.675422 |
| 1999.581711 |          |             |   | 1987.496906 |
| MRPL38      | MRPL38   | 4484.009388 |   | 6317.993191 |
| 3814.383593 |          |             |   | 4683.92128  |
| CEP192      | CEP192   | 2306.430116 |   | 1287.76971  |
| 1405.646549 |          |             |   | 1299.997976 |
| TRIM13      | TRIM13   | 1219.397537 |   | 889.6579385 |
| 1597.025657 |          |             |   | 1552.676155 |
| ZNF773      | ZNF773   | 502.5182935 |   | 599.1988399 |
| 1021.94558  |          |             |   | 817.8558698 |
| TMEM205     | TMEM205  | 1126.859204 |   | 1612.758911 |
| 1395.276253 |          |             |   | 1639.283163 |
| HSD11B1L    | HSD11B1L |             |   | 63.25405093 |
| 129.4640842 |          | 78.24860065 |   | 72.10697904 |
| ATP9B       | ATP9B    | 1199.484225 |   | 1176.054672 |
| 1470.696591 |          |             |   | 1813.390034 |
| ARID3A      | ARID3A   | 261.2158029 |   | 238.6639447 |
| 99.93194782 |          |             |   | 59.82133545 |
| LRP2BP      | LRP2BP   | 49.19759517 |   | 25.38978135 |
| 59.39351616 |          |             |   | 78.57130627 |
| TMEM184B    | TMEM184B |             |   | 3407.519151 |
| 2502.674676 |          | 3167.654195 |   | 3662.222062 |
| TTL1        | TTL1     | 365.4678498 |   | 461.0784293 |
| 367.6741476 |          |             |   | 348.2137437 |
| PMPCB       | PMPCB    | 5740.890807 |   | 5780.745418 |
| 5437.806368 |          |             |   | 4724.992645 |
| PAXBP1      | PAXBP1   | 2324.000686 |   | 1796.580928 |
| 2545.436407 |          |             |   | 2809.817055 |
| TMEM171     | TMEM171  | 0           | 0 | 11.60712479 |
| 0           |          |             |   | 13.19855915 |
| CDC45       | CDC45    | 6435.513996 |   | 7406.707016 |
| 4068.927234 |          |             |   | 3166.0665   |
| CPT2        | CPT2     | 2538.361636 |   | 3545.429068 |
| 2715.132167 |          |             |   | 2360.710611 |
| DDB2        | DDB2     | 6481.197477 |   | 9166.726659 |
| 5213.430863 |          |             |   | 7516.952585 |



|             |             |             |             |             |
|-------------|-------------|-------------|-------------|-------------|
| ADCY1       | ADCY1       | 105.4234182 | 23.35859884 | 61.60704696 |
| 68.8210584  |             |             |             |             |
| ATG4D       | ATG4D       | 1488.812939 | 1783.378242 | 2283.032161 |
| 1513.120531 |             |             |             |             |
| EPHA5       | EPHA5       | 0           | 5.357134518 | 1.885508449 |
| PHB         | PHB         | 9523.248778 | 16354.06596 | 9677.663507 |
| 9529.359703 |             |             |             |             |
| PDE6B       | PDE6B       | 174.5343257 | 132.026863  | 407.1422234 |
| 498.7169849 |             |             |             |             |
| PIK3CD      | PIK3CD      | 28705.62541 | 25827.50118 | 18456.22127 |
| 18638.25102 |             |             |             |             |
| PAPSS2      | PAPSS2      | 66.76816487 | 60.93547524 | 21.42853807 |
| 228.1465224 |             |             |             |             |
| DDX19B      | DDX19B      | 2704.696363 | 3821.669889 | 2448.210475 |
| 2278.636961 |             |             |             |             |
| SUGP2       | SUGP2       | 3683.962781 | 2049.463151 | 2595.531674 |
| 2335.202215 |             |             |             |             |
| EIF6        | EIF6        | 7538.945773 | 12138.34667 | 8663.379372 |
| 7456.243163 |             |             |             |             |
| RSBN1L      | RSBN1L      | 1472.413741 | 1564.010531 | 1485.711973 |
| 1513.120531 |             |             |             |             |
| MIR21       | MIR21       | 32.79839678 | 8.124730032 | 26.78567259 |
| 31.11088942 |             |             |             |             |
| BACH1-IT2   | BACH1-IT2   | 0           | 0           | 0           |
| SPATC1      | SPATC1      | 4.685485254 | 4.062365016 | 21.42853807 |
| 14.14131337 |             |             |             |             |
| PIGA        | PIGA        | 1087.032579 | 854.1122447 | 1050.891221 |
| 1212.381933 |             |             |             |             |
| MYRIP       | MYRIP       | 1.171371313 | 2.031182508 | 5.357134518 |
| 9.427542247 |             |             |             |             |
| C16orf93    | C16orf93    |             | 65.59679355 | 68.04461402 |
| 43.7499319  | 53.73699081 |             |             |             |
| DNAJA4      | DNAJA4      | 2254.889778 | 1490.887961 | 1316.962236 |
| 1856.283068 |             |             |             |             |
| SPNS2       | SPNS2       | 805.9034637 | 831.7692371 | 776.7845051 |
| 774.0012185 |             |             |             |             |
| LEMD3       | LEMD3       | 3162.702546 | 2853.811424 | 3781.244114 |
| 3551.355165 |             |             |             |             |
| NDRG2       | NDRG2       | 62.08267961 | 120.8553592 | 1054.462644 |
| 710.8366854 |             |             |             |             |
| TMBIM4      | TMBIM4      | 7630.312736 | 5886.366908 | 5249.098972 |
| 7409.105452 |             |             |             |             |
| IFT80       | IFT80       | 1082.347094 | 609.3547524 | 679.4632281 |
| 613.7330003 |             |             |             |             |
| ENDOU       | ENDOU       | 10.54234182 | 14.21827756 | 29.46423985 |
| 0.942754225 |             |             |             |             |
| TRAPPC9     | TRAPPC9     | 1276.794732 | 1054.183722 | 1279.462294 |
| 910.7005811 |             |             |             |             |
| LILRB1      | LILRB1      | 0           | 43.7499319  | 11.3130507  |
| ZSWIM7      | ZSWIM7      | 494.3186943 | 516.9359483 | 1077.676894 |

|             |             |             |             |             |             |
|-------------|-------------|-------------|-------------|-------------|-------------|
| 715.5504566 |             |             |             |             |             |
| TCN2        | TCN2        | 125.3367305 | 156.4010531 | 158.928324  |             |
| 29.22538097 |             |             |             |             |             |
| GOLT1A      | GOLT1A      | 0           | 0           | 1.785711506 | 9.427542247 |
| NRN1L       | NRN1L       | 19.91331233 | 2.031182508 | 28.5713841  |             |
| 25.45436407 |             |             |             |             |             |
| DERL3       | DERL3       | 265.9012882 | 371.706399  | 284.8209852 |             |
| 181.9515654 |             |             |             |             |             |
| KBTBD3      | KBTBD3      | 590.371142  | 665.2122714 | 866.9629362 |             |
| 743.8330833 |             |             |             |             |             |
| TFAM        | TFAM        | 3379.406239 | 3336.21727  | 2630.353048 |             |
| 3887.918423 |             |             |             |             |             |
| PITPNM1     | PITPNM1     | 9226.891836 | 7380.301643 | 3452.673197 |             |
| 5416.123021 |             |             |             |             |             |
| SP4         | SP4         | 2147.123618 | 1618.852459 | 1449.104887 |             |
| 1489.551675 |             |             |             |             |             |
| GAPVD1      | GAPVD1      | 6598.334609 | 6584.0781   | 6231.2403   |             |
| 6042.111826 |             |             |             |             |             |
| F2RL3       | F2RL3       | 208.5040938 | 294.5214637 | 26.78567259 |             |
| 12.25580492 |             |             |             |             |             |
| BCL2L2      | BCL2L2      | 11.71371313 | 8.124730032 | 9.821413283 |             |
| 9.427542247 |             |             |             |             |             |
| B2M         | B2M         | 462073.1848 | 445770.4224 | 787339.8458 |             |
| 659240.6895 |             |             |             |             |             |
| MTMR7       | MTMR7       | 84.33873457 | 47.73278894 | 157.1426125 |             |
| 108.4167358 |             |             |             |             |             |
| HNRNPA2B1   | HNRNPA2B1   |             | 85747.89426 | 79032.2958  |             |
| 54696.34343 | 65511.04832 |             |             |             |             |
| SLC38A9     | SLC38A9     | 1397.445977 | 1391.360018 | 990.1770301 |             |
| 1296.287059 |             |             |             |             |             |
| AGAP1       | AGAP1       | 4.685485254 | 2.031182508 | 33.03566286 |             |
| 26.39711829 |             |             |             |             |             |
| ZNF501      | ZNF501      | 72.62502143 | 124.9177242 | 308.9280905 |             |
| 240.4023273 |             |             |             |             |             |
| ACTN2       | ACTN2       | 4.685485254 | 3.046773762 | 3.571423012 |             |
| 4.713771124 |             |             |             |             |             |
| RYR2        | RYR2        | 0           | 7.109138778 | 26.78567259 | 26.39711829 |
| MCTP1       | MCTP1       | 23.42742627 | 8.124730032 | 4.464278765 |             |
| 39.59567744 |             |             |             |             |             |
| CCDC159     | CCDC159     | 231.9315201 | 273.1940473 | 411.6065021 |             |
| 532.656137  |             |             |             |             |             |
| C11orf57    | C11orf57    |             | 954.6676205 | 941.4530925 |             |
| 937.4985407 | 909.7578268 |             |             |             |             |
| TMEM8B      | TMEM8B      | 72.62502143 | 62.96665775 | 213.392525  |             |
| 155.5544471 |             |             |             |             |             |
| WDR33       | WDR33       | 7349.183621 | 5818.322294 | 6051.776294 |             |
| 6585.13826  |             |             |             |             |             |
| RBM12       | RBM12       | 8320.25044  | 7303.116708 | 6281.240223 |             |
| 7449.643884 |             |             |             |             |             |
| SELP        | SELP        | 63.25405093 | 179.759652  | 115.1783921 |             |

|             |          |             |             |             |             |
|-------------|----------|-------------|-------------|-------------|-------------|
| 240.4023273 |          |             |             |             |             |
| SASH1       | SASH1    | 126.5081019 | 173.6661044 | 61.60704696 |             |
| 60.33627038 |          |             |             |             |             |
| CTC1        | CTC1     | 2844.089549 | 2730.924882 | 5316.956009 |             |
| 4427.173839 |          |             |             |             |             |
| SPTBN4      | SPTBN4   | 7.028227881 | 10.15591254 | 11.60712479 |             |
| 14.14131337 |          |             |             |             |             |
| DTX1        | DTX1     | 0           | 3.046773762 | 103.5712674 | 131.0428372 |
| ARHGAP35    | ARHGAP35 |             | 2025.301001 | 869.3461135 |             |
| 830.3558503 |          | 971.9796057 |             |             |             |
| UTP14A      | UTP14A   | 1782.827139 | 2257.659358 | 1768.747247 |             |
| 2165.506454 |          |             |             |             |             |
| RCAN1       | RCAN1    | 1653.976295 | 1793.534155 | 1654.46171  |             |
| 1639.449597 |          |             |             |             |             |
| DMPK        | DMPK     | 49.19759517 | 64.99784026 | 43.7499319  |             |
| 44.30944856 |          |             |             |             |             |
| STARD10     | STARD10  | 644.2542224 | 801.3014994 | 1011.605568 |             |
| 856.9635903 |          |             |             |             |             |
| UBN2        | UBN2     | 274.1008873 | 196.009112  | 283.0352737 |             |
| 344.105292  |          |             |             |             |             |
| ZDHHC23     | ZDHHC23  | 51.54033779 | 76.16934405 | 316.0709366 |             |
| 239.4595731 |          |             |             |             |             |
| KLHL2       | KLHL2    | 2697.668135 | 4416.806364 | 2813.388478 |             |
| 2859.373564 |          |             |             |             |             |
| IL18R1      | IL18R1   | 2164.694187 | 2193.677109 | 2095.532452 |             |
| 2122.13976  |          |             |             |             |             |
| CLCN4       | CLCN4    | 7.028227881 | 30.46773762 | 0           | 0           |
| FAM189B     | FAM189B  | 235.445634  | 77.18493531 | 123.2140939 |             |
| 107.4739816 |          |             |             |             |             |
| P2RX1       | P2RX1    | 0           | 5.07795627  | 35.71423012 | 2.828262674 |
| OSBP        | OSBP     | 5631.953275 | 5933.084106 | 8924.986107 |             |
| 7354.425707 |          |             |             |             |             |
| CPNE4       | CPNE4    | 7.028227881 | 1.015591254 | 0           | 0.942754225 |
| PRKAG1      | PRKAG1   | 3903.009216 | 4619.924615 | 3074.995213 |             |
| 2869.74386  |          |             |             |             |             |
| ME3         | ME3      | 66.76816487 | 105.6214904 | 44.64278765 |             |
| 128.2145746 |          |             |             |             |             |
| HCG18       | HCG18    | 23.42742627 | 136.089228  | 166.0711701 |             |
| 35.82466054 |          |             |             |             |             |
| CHRD2       | CHRD2    | 0           | 0           | 0.942754225 |             |
| PCIF1       | PCIF1    | 4166.567762 | 5460.834173 | 6319.63302  |             |
| 5377.470098 |          |             |             |             |             |
| NSFP1       | NSFP1    | 135.8790724 | 198.0402945 | 198.2139772 |             |
| 186.6653365 |          |             |             |             |             |
| TAF6        | TAF6     | 4878.761521 | 4658.517082 | 3605.351531 |             |
| 4287.646214 |          |             |             |             |             |
| PLXNB2      | PLXNB2   | 547.0304034 | 560.6063722 | 561.6062687 |             |
| 419.52563   |          |             |             |             |             |
| HTR4        | HTR4     | 0           | 0           | 7.142846024 | 0           |
| PPTC7       | PPTC7    | 2454.022902 | 1711.271263 | 2030.353982 |             |

|              |              |             |             |             |             |             |
|--------------|--------------|-------------|-------------|-------------|-------------|-------------|
| 2205.102132  |              |             |             |             |             |             |
| RHOXF1       | RHOXF1       | 0           | 3.046773762 | 9.821413283 | 0           |             |
| DCUN1D5      | DCUN1D5      | 2937.799254 | 3415.433387 | 2115.175279 |             |             |
| 2423.821112  |              |             |             |             |             |             |
| C9orf64      | C9orf64      | 1786.341253 | 2092.117983 | 1471.426281 |             |             |
| 1531.975615  |              |             |             |             |             |             |
| GARNL3       | GARNL3       | 10.54234182 | 9.140321286 | 27.67852834 |             |             |
| 8.484788022  |              |             |             |             |             |             |
| AKAP13       | AKAP13       | 13970.94566 | 8270.975173 | 11415.1608  |             |             |
| 14630.60281  |              |             |             |             |             |             |
| MAGI3        | MAGI3        | 435.7501286 | 411.3144579 | 429.4636172 |             |             |
| 450.6365194  |              |             |             |             |             |             |
| CHST13       | CHST13       | 3.51411394  | 4.062365016 | 0           | 0           |             |
| COL22A1      | COL22A1      | 2.342742627 | 0           | 7.142846024 | 0           |             |
| OXER1        | OXER1        | 0           | 3.046773762 | 13.3928363  | 3.771016899 |             |
| TCTN1        | TCTN1        | 448.6352131 | 343.2698439 | 353.5708782 |             |             |
| 363.9031307  |              |             |             |             |             |             |
| ANTXRLP1     | ANTXRLP1     |             | 148.7641568 | 147.2607318 |             |             |
| 136.6069302  |              |             |             |             |             |             |
| LOC101928790 | LOC101928790 |             | 0           | 0           | 0           | 0.942754225 |
| ADAMTS8      | ADAMTS8      | 5.856856567 | 2.031182508 | 16.96425931 | 0           |             |
| SNX1         | SNX1         | 7030.570623 | 8700.570273 | 6683.918167 |             |             |
| 7284.661894  |              |             |             |             |             |             |
| LEMD1-AS1    | LEMD1-AS1    |             | 0           | 0           | 0           | 0.942754225 |
| LINC01220    | LINC01220    |             | 1.171371313 | 1.015591254 | 0           |             |
| 0            |              |             |             |             |             |             |
| LOC100507346 | LOC100507346 |             | 9.370970508 | 6.093547524 |             |             |
| 73.21417175  |              |             |             |             |             |             |
| LINC01281    | LINC01281    |             | 296.3569423 | 462.0940206 |             |             |
| 645.5347094  |              |             |             |             |             |             |
| COA1         | COA1         | 2059.270769 | 2148.991094 | 1899.997042 |             |             |
| 1890.222221  |              |             |             |             |             |             |
| ATP12A       | ATP12A       | 8.199599194 | 39.60805891 | 48.21421066 | 0           |             |
| BCAS1        | BCAS1        | 15.22782708 | 16.24946006 | 53.57134518 |             |             |
| 42.42394011  |              |             |             |             |             |             |
| CST7         | CST7         | 2300.57326  | 1716.349219 | 770.5345149 |             |             |
| 1173.72901   |              |             |             |             |             |             |
| C2orf40      | C2orf40      | 1.171371313 | 0           | 13.3928363  | 4.713771124 |             |
| BAZ1B        | BAZ1B        | 7448.750182 | 6380.959849 | 6059.811996 |             |             |
| 6680.356436  |              |             |             |             |             |             |
| KIAA1683     | KIAA1683     |             | 3.51411394  | 0           | 27.67852834 |             |
| 11.3130507   |              |             |             |             |             |             |
| TTYH3        | TTYH3        | 1106.945891 | 460.0628381 | 251.7853224 |             |             |
| 411.9835962  |              |             |             |             |             |             |
| TMPRSS11B    | TMPRSS11B    |             | 2.342742627 | 0           | 0           | 0           |
| WDR61        | WDR61        | 3828.041452 | 4903.274575 | 3632.137203 |             |             |
| 3672.970459  |              |             |             |             |             |             |
| LRRC8A       | LRRC8A       | 9557.218547 | 14425.45817 | 4499.10014  |             |             |
| 4200.912825  |              |             |             |             |             |             |
| GGT5         | GGT5         | 0           | 0           | 11.60712479 | 0           |             |

|                |                |             |             |             |
|----------------|----------------|-------------|-------------|-------------|
| CWF19L2        | CWF19L2        | 488.4618377 | 346.3166176 | 883.0343397 |
| 915.4143522    |                |             |             |             |
| TNS1           | TNS1           | 3.51411394  | 56.87311023 | 86.60700804 |
| 44.30944856    |                |             |             |             |
| VPS16          | VPS16          | 3976.805609 | 4898.196618 | 3023.20958  |
| 3235.532499    |                |             |             |             |
| GIGYF1         | GIGYF1         | 438.0928712 | 109.6838554 | 399.9993774 |
| 326.1929618    |                |             |             |             |
| RAP1A          | RAP1A          | 4997.070023 | 3726.204311 | 3116.066578 |
| 4803.332775    |                |             |             |             |
| H00K2          | H00K2          | 151.1068994 | 63.98224901 | 233.9282073 |
| 196.0928787    |                |             |             |             |
| LEPREL1        | LEPREL1        | 0           | 0           | 2.828262674 |
| FCER2          | FCER2          | 0           | 88.3564391  | 8.035701777 |
| PRKDC          | PRKDC          | 12928.42519 | 8415.189131 | 4542.850071 |
| 6056.25314     |                |             |             |             |
| MAD2L1BP       | MAD2L1BP       |             | 2862.83149  | 3933.384927 |
| 3550.88733     | 2851.83153     |             |             |             |
| PEG3           | PEG3           | 0           | 0           | 2.678567259 |
| SLC26A4        | SLC26A4        | 92.53833376 | 241.7107185 | 0.942754225 |
| 35.82466054    |                |             |             | 63.39275847 |
| ITGA6          | ITGA6          | 1233.453993 | 639.8224901 | 2193.746585 |
| 1907.191797    |                |             |             |             |
| CCDC169-SOHLH2 | CCDC169-SOHLH2 |             | 12.88508445 | 0           |
| 4.713771124    |                |             |             | 0           |
| TIMP1          | TIMP1          | 1670.375493 | 2379.530308 | 808.0344565 |
| 1995.810694    |                |             |             |             |
| TIAM1          | TIAM1          | 3723.789405 | 3340.279635 | 4798.206817 |
| 5422.722301    |                |             |             |             |
| HLTF           | HLTF           | 1656.319037 | 1419.796573 | 1533.926184 |
| 1751.63735     |                |             |             |             |
| RPL22          | RPL22          | 2601.615687 | 2418.122776 | 2660.710144 |
| 2457.760264    |                |             |             |             |
| EIF2S2         | EIF2S2         | 3961.577782 | 4717.421375 | 3678.565702 |
| 4097.209861    |                |             |             |             |
| FZD2           | FZD2           | 0           | 1.015591254 | 0           |
| CHURC1-FNTB    | CHURC1-FNTB    |             | 4209.908501 | 4382.276261 |
| 5059.813552    | 5273.767133    |             |             |             |
| PSMA6          | PSMA6          | 19106.23749 | 24334.58204 | 19141.93449 |
| 17738.86349    |                |             |             |             |
| PSMA1          | PSMA1          | 20291.66526 | 22935.09729 | 14016.94247 |
| 15773.22093    |                |             |             |             |
| MAP7D2         | MAP7D2         | 58.56856567 | 42.65483267 | 35.71423012 |
| 28.28262674    |                |             |             |             |
| RASIP1         | RASIP1         | 37.48388203 | 3.046773762 | 10.71426904 |
| 24.51160984    |                |             |             |             |
| LAT2           | LAT2           | 621.9981674 | 917.0789024 | 345.5351764 |
| 370.5024103    |                |             |             |             |
| GEMIN6         | GEMIN6         | 1314.278614 | 1509.168604 | 1144.641075 |
| 1066.255028    |                |             |             |             |

|             |         |             |             |             |
|-------------|---------|-------------|-------------|-------------|
| TBP         | TBP     | 2217.405896 | 2390.701812 | 2540.174617 |
| 2407.79429  |         |             |             |             |
| NPL         | NPL     | 395.9235039 | 687.555279  | 544.6420093 |
| 579.7938482 |         |             |             |             |
| GRAMD1A     | GRAMD1A | 2298.230517 | 2328.750746 | 3261.602066 |
| 2326.717427 |         |             |             |             |
| NEK11       | NEK11   | 33.96976809 | 53.82633646 | 80.35701777 |
| 82.01961755 |         |             |             |             |
| GPN1        | GPN1    | 5336.767704 | 6440.879733 | 4537.492937 |
| 4397.005704 |         |             |             |             |
| IFI44L      | IFI44L  | 1033.149498 | 519.9827221 | 10316.94823 |
| 7233.753166 |         |             |             |             |
| ROM1        | ROM1    | 112.4516461 | 81.24730032 | 185.7139966 |
| 121.615295  |         |             |             |             |
| FBXL13      | FBXL13  | 11.71371313 | 8.124730032 | 49.99992217 |
| 25.45436407 |         |             |             |             |
| NDC1        | NDC1    | 5075.551901 | 5335.916449 | 3210.709288 |
| 3877.548126 |         |             |             |             |
| CDKN2C      | CDKN2C  | 2581.702375 | 3663.237653 | 1295.533698 |
| 1251.97761  |         |             |             |             |
| KAT6A       | KAT6A   | 3241.184424 | 2010.870683 | 3951.779563 |
| 3475.934827 |         |             |             |             |
| NFIB        | NFIB    | 0           | 1.785711506 | 0           |
|             |         | 0           |             |             |
| RND1        | RND1    | 185.0766675 | 259.991361  | 356.2494455 |
| 141.4131337 |         |             |             |             |
| SUPT20H     | SUPT20H | 6014.991695 | 5048.504124 | 4916.063776 |
| 5286.965692 |         |             |             |             |
| ZFAND4      | ZFAND4  | 928.8974516 | 941.4530925 | 1528.569049 |
| 1157.702188 |         |             |             |             |
| LRP10       | LRP10   | 9331.143883 | 7183.27694  | 8357.129848 |
| 7919.135488 |         |             |             |             |
| FAM172A     | FAM172A | 1024.949899 | 892.7047123 | 862.4986574 |
| 1518.777056 |         |             |             |             |
| BARD1       | BARD1   | 2977.625879 | 2512.572763 | 1175.891027 |
| 1845.912772 |         |             |             |             |
| HOXA7       | HOXA7   | 3.51411394  | 0           | 0           |
|             |         |             | 0           |             |
| FAM134A     | FAM134A | 3731.989005 | 2910.684534 | 4171.422078 |
| 3216.677415 |         |             |             |             |
| TMEM248     | TMEM248 | 9401.426162 | 10430.12218 | 10486.59082 |
| 9658.517032 |         |             |             |             |
| SNORA2B     | SNORA2B | 23.42742627 | 9.140321286 | 14.28569205 |
| 18.85508449 |         |             |             |             |
| SNORA6      | SNORA6  | 42.16936728 | 13.2026863  | 25.89281684 |
| 32.05364364 |         |             |             |             |
| SHF         | SHF     | 383.0384195 | 344.2854351 | 642.8561422 |
| 589.2213904 |         |             |             |             |
| TPCN1       | TPCN1   | 1167.8572   | 927.2348149 | 1766.068679 |
| 2074.059294 |         |             |             |             |
| GPR87       | GPR87   | 8.199599194 | 1.015591254 | 20.53568232 |
| 13.19855915 |         |             |             |             |

|              |              |             |             |             |             |
|--------------|--------------|-------------|-------------|-------------|-------------|
| GRHL3        | GRHL3        | 1.171371313 | 7.109138778 | 0.892855753 |             |
| 1.885508449  |              |             |             |             |             |
| IL37         | IL37         | 0           | 1.015591254 | 0           | 0           |
| HRASLS       | HRASLS       | 0           | 1.015591254 | 0           | 0           |
| PFKL         | PFKL         | 17704.10603 | 18218.69151 | 7782.130743 |             |
| 10663.49304  |              |             |             |             |             |
| SPPL2B       | SPPL2B       | 1167.8572   | 772.8649443 | 732.1417175 |             |
| 967.2658346  |              |             |             |             |             |
| LZIC         | LZIC         | 1044.863212 | 1304.01917  | 1065.176913 |             |
| 1137.904349  |              |             |             |             |             |
| KTI12        | KTI12        | 1673.889607 | 2401.873316 | 2797.317074 |             |
| 1957.157771  |              |             |             |             |             |
| PHF21B       | PHF21B       | 1.171371313 | 1.015591254 | 0           | 0           |
| CNBD2        | CNBD2        | 3.51411394  | 1.015591254 | 1.785711506 | 0           |
| SMEK2        | SMEK2        | 10069.10781 | 9125.087418 | 10599.9835  |             |
| 10665.37854  |              |             |             |             |             |
| GLIPR1L1     | GLIPR1L1     |             | 5.856856567 | 2.031182508 |             |
| 6.249990271  | 9.427542247  |             |             |             |             |
| HERC1        | HERC1        | 2722.266932 | 1753.926096 | 5406.241585 |             |
| 4510.136211  |              |             |             |             |             |
| C1R          | C1R          | 357.2682506 | 263.0381348 | 104.4641231 |             |
| 71.64932108  |              |             |             |             |             |
| TEX21P       | TEX21P       | 10.54234182 | 8.124730032 | 8.92855753  |             |
| 2.828262674  |              |             |             |             |             |
| MIR3960      | MIR3960      | 7.028227881 | 2.031182508 | 0           | 4.713771124 |
| GADD45A      | GADD45A      | 1338.877411 | 2319.610424 | 2593.745963 |             |
| 1171.843501  |              |             |             |             |             |
| CHTOP        | CHTOP        | 5211.430974 | 6408.380813 | 6293.740203 |             |
| 5566.020943  |              |             |             |             |             |
| LARP1B       | LARP1B       | 597.3993699 | 506.7800358 | 801.7844662 |             |
| 680.6685502  |              |             |             |             |             |
| RFK          | RFK          | 2348.599483 | 2909.668943 | 2108.032433 |             |
| 2185.304293  |              |             |             |             |             |
| SYN1         | SYN1         | 67.93953618 | 73.12257029 | 81.24987353 |             |
| 52.79423658  |              |             |             |             |             |
| TRAF2        | TRAF2        | 5450.390722 | 6973.04955  | 5823.205221 |             |
| 5154.037347  |              |             |             |             |             |
| PDK3         | PDK3         | 4117.370167 | 3248.876422 | 3712.494221 |             |
| 4736.397225  |              |             |             |             |             |
| SCOC-AS1     | SCOC-AS1     |             | 39.82662466 | 78.20052656 |             |
| 105.3569789  | 88.61889712  |             |             |             |             |
| LOC100132077 | LOC100132077 |             | 26.94154021 | 18.28064257 | 0           |
|              | 8.484788022  |             |             |             |             |
| PIGY         | PIGY         | 5466.78992  | 8025.20209  | 10278.55543 |             |
| 7464.727951  |              |             |             |             |             |
| LOC101927055 | LOC101927055 |             | 7.028227881 | 3.046773762 | 0           |
|              | 3.771016899  |             |             |             |             |
| ZNF79        | ZNF79        | 865.6434006 | 1021.684802 | 1767.854391 |             |
| 1030.430368  |              |             |             |             |             |
| PPP3CA       | PPP3CA       | 743.820784  | 312.8021062 | 253.5710339 |             |

|                 |               |              |             |  |
|-----------------|---------------|--------------|-------------|--|
| 463.8350786     |               |              |             |  |
| AFMID AFMID     | 204.9899799   | 287.4123249  | 114.2855364 |  |
| 175.3522858     |               |              |             |  |
| SUV420H2        | SUV420H2      | 345.5545375  | 236.6327622 |  |
| 144.642632      | 165.9247436   |              |             |  |
| EMID1 EMID1     | 0 5.07795627  | 0            | 0           |  |
| TRIM65 TRIM65   | 1993.673976   | 1677.756752  | 1899.997042 |  |
| 1590.426377     |               |              |             |  |
| S100PBP S100PBP | 2285.345433   | 1839.235761  | 951.7842327 |  |
| 1326.455194     |               |              |             |  |
| HIST1H2AH       | HIST1H2AH     | 237.7883766  | 308.7397412 |  |
| 66.07132572     | 107.4739816   |              |             |  |
| B3GALT6 B3GALT6 | 1504.040766   | 2229.222803  | 2803.567065 |  |
| 2393.652977     |               |              |             |  |
| ZSWIM1 ZSWIM1   | 662.9961634   | 552.4816422  | 1023.212693 |  |
| 1184.099306     |               |              |             |  |
| C1orf174        | C1orf174      | 2024.12963   | 2256.643767 |  |
| 2474.103292     | 2612.371957   |              |             |  |
| HIST2H2AB       | HIST2H2AB     | 8.199599194  | 6.093547524 |  |
| 3.571423012     | 12.25580492   |              |             |  |
| SLC51A SLC51A   | 14.05645576   | 17.26505132  | 7.142846024 |  |
| 11.3130507      |               |              |             |  |
| STARD4 STARD4   | 1430.244374   | 1754.941687  | 1057.141212 |  |
| 1388.676973     |               |              |             |  |
| SNX29 SNX29     | 2138.924018   | 603.2612049  | 554.4634226 |  |
| 604.305458      |               |              |             |  |
| PLXNA4 PLXNA4   | 0 6.093547524 | 122.3212382  | 33.93915209 |  |
| LTC4S LTC4S     | 1.171371313   | 0 8.92855753 | 5.656525348 |  |
| NFKBID NFKBID   | 2067.470368   | 1366.985828  | 1968.746935 |  |
| 1949.615737     |               |              |             |  |
| HOPX HOPX       | 2858.146005   | 532.1698171  | 702.6774776 |  |
| 1596.082902     |               |              |             |  |
| HFE HFE         | 63.25405093   | 72.10697904  | 174.1068718 |  |
| 143.2986422     |               |              |             |  |
| EFNA1 EFNA1     | 11.71371313   | 4.062365016  | 250.8924666 |  |
| 176.29504       |               |              |             |  |
| UBE2D3 UBE2D3   | 36061.83726   | 38731.60366  | 37253.51344 |  |
| 38693.46165     |               |              |             |  |
| UBE2E1 UBE2E1   | 484.9477238   | 153.3542794  | 202.6782559 |  |
| 247.0016069     |               |              |             |  |
| C2orf44 C2orf44 | 1301.393529   | 1483.778822  | 1333.926495 |  |
| 1195.412357     |               |              |             |  |
| APIP APIP       | 1395.103234   | 1284.722936  | 1062.498346 |  |
| 1476.353116     |               |              |             |  |
| ADAMTS13        | ADAMTS13      | 8.199599194  | 22.34300759 |  |
| 92.85699832     | 63.16453306   |              |             |  |
| GAS2L2 GAS2L2   | 7.028227881   | 0 0          | 0           |  |
| RASSF2 RASSF2   | 13263.43738   | 8719.866507  | 2689.281528 |  |
| 5131.411245     |               |              |             |  |
| FAM45A FAM45A   | 3370.035269   | 4221.812843  | 1551.783299 |  |



|                           |             |               |               |  |
|---------------------------|-------------|---------------|---------------|--|
| 1983.554889               |             |               |               |  |
| NKD2 NKD2                 | 313.927512  | 829.7380546   | 20.53568232   |  |
| 52.79423658               |             |               |               |  |
| NKD1 NKD1                 | 15.22782708 | 27.42096386   | 52.67848943   |  |
| 21.68334717               |             |               |               |  |
| RHOU RHOU                 | 243.6452332 | 74.13816155   | 13.3928363    |  |
| 47.13771124               |             |               |               |  |
| SLC30A1 SLC30A1           | 867.9861433 | 991.217064    | 691.0703528   |  |
| 658.9852031               |             |               |               |  |
| TRPM4 TRPM4               | 1.171371313 | 0 1.785711506 | 2.828262674   |  |
| MXD3 MXD3                 | 13320.83458 | 19632.39453   | 10291.94827   |  |
| 10522.0799                |             |               |               |  |
| HPR HPR                   | 4.685485254 | 1.015591254   | 5.357134518   |  |
| 9.427542247               |             |               |               |  |
| MTMR3 MTMR3               | 3043.222672 | 1985.480902   | 3161.602221   |  |
| 3500.446436               |             |               |               |  |
| CACTIN CACTIN             | 1959.704207 | 1951.96639    | 2089.282462   |  |
| 1637.564088               |             |               |               |  |
| POMP POMP                 | 12439.96335 | 13786.65127   | 8292.844234   |  |
| 8910.912932               |             |               |               |  |
| LOC100129924 LOC100129924 |             | 2.342742627   | 1.015591254   |  |
| 11.60712479               | 3.771016899 |               |               |  |
| ABCF2 ABCF2               | 7632.655479 | 10055.36901   | 8952.664636   |  |
| 8618.659122               |             |               |               |  |
| RNA5-8S5 RNA5-8S5         |             | 0 1.015591254 | 0             |  |
| 1.885508449               |             |               |               |  |
| PA2G4P4 PA2G4P4           | 200.3044946 | 70.07579653   | 127.6783727   |  |
| 139.5276253               |             |               |               |  |
| FAM129A FAM129A           | 12130.72132 | 7637.24623    | 2776.781392   |  |
| 5148.380821               |             |               |               |  |
| GNG2 GNG2                 | 7526.060689 | 8961.577226   | 4469.6359     |  |
| 4665.690658               |             |               |               |  |
| PLB1 PLB1                 | 39.82662466 | 75.1537528    | 8.92855753    |  |
| 14.14131337               |             |               |               |  |
| B4GALT1 B4GALT1           | 3250.555395 | 740.3660242   | 727.6774387   |  |
| 2770.754666               |             |               |               |  |
| LRRTM2 LRRTM2             | 4.685485254 | 2.031182508   | 0 2.828262674 |  |
| NCOA2 NCOA2               | 3025.652103 | 2533.900179   | 2077.675337   |  |
| 2986.645384               |             |               |               |  |
| TRPC3 TRPC3               | 5.856856567 | 15.23386881   | 66.96418148   |  |
| 5.656525348               |             |               |               |  |
| NUP188 NUP188             | 20644.24803 | 20072.14555   | 12691.05167   |  |
| 14105.48871               |             |               |               |  |
| CHMP3 CHMP3               | 1889.421929 | 2463.824382   | 3212.494999   |  |
| 2557.692212               |             |               |               |  |
| RPLP2 RPLP2               | 10048.02313 | 10155.91254   | 12336.58794   |  |
| 10725.71481               |             |               |               |  |
| LHB LHB                   | 5.856856567 | 0 1.785711506 | 2.828262674   |  |
| NQ02 NQ02                 | 803.560721  | 2733.971656   | 2449.996186   |  |
| 931.441174                |             |               |               |  |

|             |            |             |             |             |             |
|-------------|------------|-------------|-------------|-------------|-------------|
| FNDC7       | FNDC7      | 0           | 1.015591254 | 0           | 0           |
| LINC00161   | LINC00161  |             | 3.51411394  |             | 2.031182508 |
| 17.85711506 |            | 0.942754225 |             |             |             |
| CA5BP1      | CA5BP1     | 284.6432292 | 634.7445338 |             | 876.7843495 |
| 509.0872813 |            |             |             |             |             |
| LOC645166   | LOC645166  |             | 98.39519033 |             | 76.16934405 |
| 8.035701777 |            | 20.74059294 |             |             |             |
| PCED1B-AS1  | PCED1B-AS1 |             | 3494.200628 |             | 3982.133307 |
| 6936.596345 |            | 4992.826374 |             |             |             |
| IDI2-AS1    | IDI2-AS1   |             | 809.4175776 |             | 1118.165971 |
| 1056.248356 |            | 1069.083291 |             |             |             |
| NENF        | NENF       | 1912.849355 | 2682.176502 |             | 2308.032122 |
| 2108.941201 |            |             |             |             |             |
| PCGF5       | PCGF5      | 4516.807785 | 3750.578501 |             | 7627.666698 |
| 7883.310827 |            |             |             |             |             |
| GMPR2       | GMPR2      | 4111.51331  | 5032.254664 |             | 3458.923187 |
| 3455.194234 |            |             |             |             |             |
| FAM151B     | FAM151B    | 10.54234182 | 26.40537261 |             | 8.92855753  |
| 8.484788022 |            |             |             |             |             |
| ZNF251      | ZNF251     | 354.925508  | 394.0494066 |             | 905.3557336 |
| 886.1889712 |            |             |             |             |             |
| F13A1       | F13A1      | 0           | 0           | 0.942754225 |             |
| ATP6V1C1    | ATP6V1C1   |             | 4738.196963 |             | 4891.08748  |
| 4279.457624 |            | 4085.89681  |             |             |             |
| PLCB2       | PLCB2      | 3011.595647 | 1451.279902 |             | 633.0347289 |
| 1890.222221 |            |             |             |             |             |
| NOL6        | NOL6       | 3495.371999 | 3895.808051 |             | 3950.886707 |
| 4029.331556 |            |             |             |             |             |
| IRGQ        | IRGQ       | 1382.21815  | 899.8138511 |             | 716.0703139 |
| 980.4643937 |            |             |             |             |             |
| PLXDC2      | PLXDC2     | 0           | 0           | 15.1785478  | 0           |
| CAMK2N1     | CAMK2N1    | 4.685485254 | 1.015591254 |             | 35.71423012 |
| 37.71016899 |            |             |             |             |             |
| PCDHGB7     | PCDHGB7    | 2.342742627 | 14.21827756 |             | 37.49994163 |
| 17.91233027 |            |             |             |             |             |
| CXCR2       | CXCR2      | 26.94154021 | 63.98224901 |             | 23.21424958 |
| 6.599279573 |            |             |             |             |             |
| WWTR1       | WWTR1      | 83.16736326 | 26.40537261 |             | 10.71426904 |
| 97.10368515 |            |             |             |             |             |
| SAP25       | SAP25      | 66.76816487 | 22.34300759 |             | 58.9284797  |
| 72.5920753  |            |             |             |             |             |
| CYB561A3    | CYB561A3   |             | 5587.441165 |             | 6549.547997 |
| 4406.243141 |            | 4132.091767 |             |             |             |
| ARMC6       | ARMC6      | 3408.690522 | 4631.096118 |             | 2249.996498 |
| 2706.647379 |            |             |             |             |             |
| PLA2G4E     | PLA2G4E    | 0           | 7.109138778 | 0           | 0           |
| TMEM31      | TMEM31     | 0           | 0           | 8.035701777 | 1.885508449 |
| PPIL3       | PPIL3      | 1424.387517 | 2274.924409 |             | 1886.604206 |
| 1386.791465 |            |             |             |             |             |
| STX1B       | STX1B      | 5.856856567 | 0           | 5.357134518 | 3.771016899 |

|             |             |             |             |             |
|-------------|-------------|-------------|-------------|-------------|
| C9orf171    | C9orf171    | 0           | 0           | 3.571423012 |
| 1.885508449 |             |             |             |             |
| LOC642846   | LOC642846   | 531.8025763 |             | 281.3187774 |
| 195.5354099 | 357.3038512 |             |             |             |
| ZNF37A      | ZNF37A      | 2263.089378 | 1942.826069 | 2720.531479 |
| 3038.496866 |             |             |             |             |
| CSE1L       | CSE1L       | 14986.52458 | 15558.85801 | 9566.949394 |
| 12117.22005 |             |             |             |             |
| DLAT        | DLAT        | 4854.162723 | 5906.678734 | 4220.529145 |
| 3767.245882 |             |             |             |             |
| COL9A3      | COL9A3      | 9.370970508 | 26.40537261 | 9.821413283 |
| 18.85508449 |             |             |             |             |
| NEK3        | NEK3        | 372.4960777 | 427.563918  | 225.8925055 |
| 421.4111384 |             |             |             |             |
| ANAPC16     | ANAPC16     | 5423.449181 | 5175.453031 | 7610.702439 |
| 7047.08783  |             |             |             |             |
| QRSL1       | QRSL1       | 2290.030918 | 2999.040973 | 2142.853807 |
| 2416.279078 |             |             |             |             |
| APITD1      | APITD1      | 1154.972115 | 1157.77403  | 732.1417175 |
| 703.2946516 |             |             |             |             |
| TBC1D17     | TBC1D17     | 1055.405553 | 829.7380546 | 1282.140861 |
| 1279.317483 |             |             |             |             |
| GIPR        | GIPR        | 18.74194102 | 15.23386881 | 83.03558503 |
| 7.542033798 |             |             |             |             |
| HLA-DRB1    | HLA-DRB1    |             | 8073.091092 | 7863.72308  |
| 2379.460582 | 3781.387195 |             |             |             |
| GBP1        | GBP1        | 13373.54629 | 17788.08081 | 58232.05221 |
| 39933.18345 |             |             |             |             |
| ZNF189      | ZNF189      | 268.2440308 | 79.21611782 | 183.9282851 |
| 210.2341921 |             |             |             |             |
| ZNF654      | ZNF654      | 1269.766504 | 1140.508978 | 1768.747247 |
| 1891.164975 |             |             |             |             |
| FBXW7       | FBXW7       | 1618.835155 | 1738.692227 | 1676.783104 |
| 1630.964809 |             |             |             |             |
| SCNN1D      | SCNN1D      | 8.199599194 | 16.24946006 | 27.67852834 |
| 25.45436407 |             |             |             |             |
| TOPORS      | TOPORS      | 2553.589463 | 3007.165703 | 5183.920502 |
| 3525.9008   |             |             |             |             |
| SLC9A5      | SLC9A5      | 58.56856567 | 71.09138778 | 88.39271955 |
| 76.3630922  |             |             |             |             |
| NEK2        | NEK2        | 3337.236872 | 3104.662464 | 923.2128486 |
| 1686.587308 |             |             |             |             |
| YY1         | YY1         | 1918.706211 | 1566.041714 | 2028.568271 |
| 2063.688998 |             |             |             |             |
| PDE6C       | PDE6C       | 2.342742627 | 2.031182508 | 5.357134518 |
| 7.542033798 |             |             |             |             |
| TBRG1       | TBRG1       | 2621.529    | 3193.018903 | 3977.67238  |
| 3129.944026 |             |             |             |             |
| ATAD1       | ATAD1       | 4338.759345 | 4715.390193 | 4241.064827 |
| 4395.120196 |             |             |             |             |

|              |              |             |             |             |             |
|--------------|--------------|-------------|-------------|-------------|-------------|
| MAP4K1       | MAP4K1       | 16503.45044 | 15128.24732 | 6241.061714 |             |
| 9538.787246  |              |             |             |             |             |
| TOM1         | TOM1         | 2258.403892 | 3433.71403  | 4136.600704 |             |
| 3220.448432  |              |             |             |             |             |
| LINC01481    | LINC01481    |             | 228.4174061 | 243.741901  |             |
| 299.1066773  | 202.6921583  |             |             |             |             |
| CD72         | CD72         | 311.5847694 | 253.8978135 | 297.3209658 |             |
| 276.2269878  |              |             |             |             |             |
| MADD         | MADD         | 5619.068191 | 5384.664829 | 5751.776761 |             |
| 5550.936875  |              |             |             |             |             |
| PLEKHG4      | PLEKHG4      | 380.6956769 | 387.955859  | 485.7135296 |             |
| 409.1553335  |              |             |             |             |             |
| CFAP46       | CFAP46       | 3.51411394  | 3.046773762 | 14.28569205 | 0           |
| IL6ST        | IL6ST        | 4153.682678 | 1856.500812 | 9210.699948 |             |
| 7465.670706  |              |             |             |             |             |
| NDOR1        | NDOR1        | 2766.779042 | 1857.516404 | 1357.140745 |             |
| 1725.240231  |              |             |             |             |             |
| GALNT16      | GALNT16      | 3.51411394  | 0           | 0           | 0           |
| ALDH16A1     | ALDH16A1     |             | 3585.567591 | 3382.934467 |             |
| 2016.06829   | 2151.365141  |             |             |             |             |
| ADAM32       | ADAM32       | 1.171371313 | 0           | 0           | 0           |
| FGF14-AS2    | FGF14-AS2    |             | 50.36896648 | 64.99784026 |             |
| 109.8212576  | 48.08046546  |             |             |             |             |
| LOC101929584 | LOC101929584 |             | 0           | 0           | 0.892855753 |
| FBX046       | FBX046       | 1580.179902 | 1108.010058 | 723.21316   | 0           |
| 919.1853691  |              |             |             |             |             |
| E2F3         | E2F3         | 2579.359632 | 2011.886274 | 1193.748142 |             |
| 1555.544471  |              |             |             |             |             |
| UFM1         | UFM1         | 3502.400227 | 3472.306498 | 6537.489824 |             |
| 5901.641447  |              |             |             |             |             |
| LOC100128288 | LOC100128288 |             | 12.88508445 | 7.109138778 |             |
| 34.82137437  | 5.656525348  |             |             |             |             |
| SAMD15       | SAMD15       | 15.22782708 | 14.21827756 | 31.24995136 |             |
| 10.37029647  |              |             |             |             |             |
| SNORD29      | SNORD29      | 18.74194102 | 13.2026863  | 33.92851862 |             |
| 33.93915209  |              |             |             |             |             |
| ABCD4        | ABCD4        | 1623.52064  | 1783.378242 | 2012.496867 |             |
| 2243.755055  |              |             |             |             |             |
| GPR98        | GPR98        | 0           | 4.464278765 | 2.828262674 |             |
| AP3B2        | AP3B2        | 1.171371313 | 1.015591254 | 7.142846024 |             |
| 1.885508449  |              |             |             |             |             |
| AFAP1L2      | AFAP1L2      | 196.7903807 | 412.3300491 | 231.24964   |             |
| 248.8871153  |              |             |             |             |             |
| ZNF740       | ZNF740       | 267.0726595 | 245.7730835 | 374.9994163 |             |
| 366.7313934  |              |             |             |             |             |
| SNHG20       | SNHG20       | 412.3227023 | 516.9359483 | 483.0349624 |             |
| 465.720587   |              |             |             |             |             |
| PDCL3P4      | PDCL3P4      | 11.71371313 | 6.093547524 | 20.53568232 |             |
| 1.885508449  |              |             |             |             |             |
| SPECC1       | SPECC1       | 509.5465214 | 645.9160376 | 320.5352153 |             |

|             |          |             |             |             |             |
|-------------|----------|-------------|-------------|-------------|-------------|
| 576.0228313 |          |             |             |             |             |
| GK3P        | GK3P     | 7.028227881 | 2.031182508 | 0           | 0.942754225 |
| PIP5K1A     | PIP5K1A  | 5232.515657 | 2810.141    | 3016.066734 |             |
| 2302.205817 |          |             |             |             |             |
| C11orf68    | C11orf68 |             | 1734.800915 | 1959.075529 |             |
| 2952.673975 |          | 2249.41158  |             |             |             |
| VCAN        | VCAN     | 4.685485254 | 14.21827756 | 0           | 4.713771124 |
| UBE2C       | UBE2C    | 10132.36186 | 12188.11064 | 4371.421767 |             |
| 7128.164693 |          |             |             |             |             |
| CLMN        | CLMN     | 11.71371313 | 4.062365016 | 11.60712479 |             |
| 4.713771124 |          |             |             |             |             |
| TRIM58      | TRIM58   | 131.1935871 | 27.42096386 | 33.92851862 |             |
| 32.99639787 |          |             |             |             |             |
| TOM1L2      | TOM1L2   | 748.5062693 | 614.4327087 | 821.4272928 |             |
| 514.7438067 |          |             |             |             |             |
| KLLN        | KLLN     | 50.36896648 | 9.140321286 | 43.7499319  |             |
| 12.25580492 |          |             |             |             |             |
| SEC61A2     | SEC61A2  | 2841.746806 | 3325.045766 | 1867.854235 |             |
| 2060.860735 |          |             |             |             |             |
| C1orf27     | C1orf27  | 858.6151728 | 1046.058992 | 977.6770496 |             |
| 1122.820282 |          |             |             |             |             |
| KCNRG       | KCNRG    | 55.05445173 | 35.54569389 | 64.28561422 |             |
| 78.24860065 |          |             |             |             |             |
| SLC4A1AP    | SLC4A1AP |             | 3071.335584 | 4698.125141 |             |
| 3882.136814 |          | 3109.203433 |             |             |             |
| ADSL        | ADSL     | 8699.774745 | 10861.74846 | 5358.92023  |             |
| 6740.692707 |          |             |             |             |             |
| NDUFS4      | NDUFS4   | 2108.468364 | 2169.302919 | 1341.962197 |             |
| 1604.56769  |          |             |             |             |             |
| VPS4B       | VPS4B    | 5422.27781  | 6129.093218 | 5816.062375 |             |
| 5553.765138 |          |             |             |             |             |
| CLCN6       | CLCN6    | 342.0404235 | 212.2585721 | 914.2842911 |             |
| 590.1641447 |          |             |             |             |             |
| MRE11A      | MRE11A   | 2976.454508 | 2533.900179 | 1447.319176 |             |
| 2538.837127 |          |             |             |             |             |
| 5-Sep       | 5-Sep    | 3.51411394  | 1.015591254 | 25.89281684 |             |
| 40.53843166 |          |             |             |             |             |
| PNN         | PNN      | 3802.271283 | 3438.791986 | 4427.671679 |             |
| 4154.717868 |          |             |             |             |             |
| GPAA1       | GPAA1    | 6522.195473 | 8228.32034  | 5539.277092 |             |
| 5497.199884 |          |             |             |             |             |
| SEC62       | SEC62    | 2682.440308 | 2382.577082 | 3731.244192 |             |
| 3278.899194 |          |             |             |             |             |
| NEK7        | NEK7     | 7476.863094 | 7673.807516 | 8142.844468 |             |
| 8394.283617 |          |             |             |             |             |
| CLDN14      | CLDN14   | 3.51411394  | 0           | 0           | 0           |
| PSEN1       | PSEN1    | 5460.933063 | 6046.830327 | 4216.957722 |             |
| 4581.785532 |          |             |             |             |             |
| GOLGA7      | GOLGA7   | 6003.277981 | 5934.099697 | 5788.383847 |             |
| 5940.29437  |          |             |             |             |             |

|             |             |             |               |               |
|-------------|-------------|-------------|---------------|---------------|
| SCFD1       | SCFD1       | 3995.54755  | 4490.944525   | 3392.851862   |
| 3878.49088  |             |             |               |               |
| STIP1       | STIP1       | 22929.59346 | 36671.98459   | 23978.5341    |
| 23507.57659 |             |             |               |               |
| P2RY14      | P2RY14      | 69.11090749 | 30.46773762   | 98.21413283   |
| 56.56525348 |             |             |               |               |
| TMEM14E     | TMEM14E     | 5.856856567 | 5.07795627    | 14.28569205   |
| 10.37029647 |             |             |               |               |
| KIAA2022    | KIAA2022    |             | 5.856856567   | 6.093547524   |
| 58.9284797  | 24.51160984 |             |               |               |
| RTKN        | RTKN        | 42.16936728 | 109.6838554   | 36.60708587   |
| 40.53843166 |             |             |               |               |
| GRN         | GRN         | 4677.285655 | 6810.55495    | 4683.028425   |
| 4102.866386 |             |             |               |               |
| COX8A       | COX8A       | 10011.71062 | 11750.39081   | 5345.527393   |
| 5565.078188 |             |             |               |               |
| C3orf80     | C3orf80     | 19.91331233 | 23.35859884   | 0 0           |
| VTN         | VTN         | 5.856856567 | 4.062365016   | 0 14.14131337 |
| NEB         | NEB         | 24.59879758 | 11.17150379   | 41.07136464   |
| 71.64932108 |             |             |               |               |
| MTRNR2L2    | MTRNR2L2    |             | 4.685485254   | 1.015591254   |
| 4.464278765 | 0           |             |               |               |
| FLJ22184    | FLJ22184    |             | 0 1.015591254 | 1.785711506   |
|             | 6.599279573 |             |               |               |
| AZIN1       | AZIN1       | 9379.170107 | 8548.231585   | 5902.669383   |
| 7138.53499  |             |             |               |               |
| NIN         | NIN         | 6059.503805 | 3678.471522   | 5608.919841   |
| 5084.273534 |             |             |               |               |
| ZNF85       | ZNF85       | 562.2582305 | 527.0918609   | 574.999105    |
| 652.3859235 |             |             |               |               |
| C21orf140   | C21orf140   |             | 1.171371313   | 0 0.892855753 |
| 0           |             |             |               |               |
| C17orf107   | C17orf107   |             | 29.28428284   | 9.140321286   |
| 190.1782754 | 48.08046546 |             |               |               |
| SCRN1       | SCRN1       | 78.481878   | 31.48332888   | 381.2494065   |
| 416.6973673 |             |             |               |               |
| TCP11L1     | TCP11L1     | 795.3611218 | 936.3751362   | 733.927429    |
| 845.6505396 |             |             |               |               |
| OTUD5       | OTUD5       | 7056.340792 | 8052.623053   | 5600.884139   |
| 7211.127065 |             |             |               |               |
| SCARNA5     | SCARNA5     | 8.199599194 | 1.015591254   | 18.74997081   |
| 17.91233027 |             |             |               |               |
| LINC00470   | LINC00470   |             | 0 1.015591254 | 0             |
| 8.484788022 |             |             |               |               |
| ZNF304      | ZNF304      | 742.6494127 | 667.2434539   | 1101.783999   |
| 903.1585473 |             |             |               |               |
| NUMBL       | NUMBL       | 256.5303176 | 160.4634181   | 303.570956    |
| 251.715378  |             |             |               |               |
| PPP1R1B     | PPP1R1B     | 0 0         | 0.892855753   | 0             |
| PNKD        | PNKD        | 1960.875579 | 2411.013637   | 1420.533503   |

|             |           |             |             |             |             |
|-------------|-----------|-------------|-------------|-------------|-------------|
| 1387.734219 |           |             |             |             |             |
| MCCC2       | MCCC2     | 7873.957969 | 8676.196083 | 3684.815693 |             |
| 5182.319973 |           |             |             |             |             |
| TECPR2      | TECPR2    | 646.596965  | 475.2967069 | 419.6422039 |             |
| 395.9567744 |           |             |             |             |             |
| EFR3B       | EFR3B     | 4.685485254 | 4.062365016 | 36.60708587 |             |
| 39.59567744 |           |             |             |             |             |
| ARHGAP26    | ARHGAP26  |             | 925.3833376 | 602.2456137 |             |
| 1335.712207 |           | 1313.256635 |             |             |             |
| RIPPLY3     | RIPPLY3   | 0           | 0           | 6.249990271 | 2.828262674 |
| SH3BP1      | SH3BP1    | 2375.541024 | 1140.508978 | 539.2848748 |             |
| 827.7382093 |           |             |             |             |             |
| PKN1        | PKN1      | 6627.618892 | 4307.122508 | 3217.852134 |             |
| 3525.9008   |           |             |             |             |             |
| ETAA1       | ETAA1     | 980.4377894 | 757.6310755 | 831.2487061 |             |
| 966.3230803 |           |             |             |             |             |
| EGFLAM      | EGFLAM    | 0           | 0           | 1.785711506 | 2.828262674 |
| RAB11FIP1   | RAB11FIP1 |             | 10875.01127 | 12627.86165 |             |
| 4466.064477 |           | 5661.239119 |             |             |             |
| MFSD1       | MFSD1     | 3035.023073 | 2817.250139 | 3025.888147 |             |
| 3919.972066 |           |             |             |             |             |
| B3GNT2      | B3GNT2    | 3840.926537 | 3755.656457 | 3984.815226 |             |
| 4228.252698 |           |             |             |             |             |
| ODF2L       | ODF2L     | 954.6676205 | 643.8848551 | 1389.283552 |             |
| 1441.47121  |           |             |             |             |             |
| EPAS1       | EPAS1     | 159.3064986 | 140.1515931 | 192.8568427 |             |
| 355.4183427 |           |             |             |             |             |
| RPL17       | RPL17     | 10296.35385 | 11611.25481 | 10594.62637 |             |
| 9885.7208   |           |             |             |             |             |
| UNC5B-AS1   | UNC5B-AS1 |             | 0           | 0           | 8.92855753  |
| MIR4722     | MIR4722   | 9.370970508 | 12.18709505 | 8.92855753  | 0           |
| 14.14131337 |           |             |             |             |             |
| MIR4721     | MIR4721   | 2475.107585 | 4614.846658 | 3018.745301 |             |
| 3014.928011 |           |             |             |             |             |
| MIR4720     | MIR4720   | 0           | 2.031182508 | 2.678567259 | 0.942754225 |
| MIR4717     | MIR4717   | 0           | 1.015591254 | 0           | 0           |
| MIR4715     | MIR4715   | 2.342742627 | 1.015591254 | 0           | 0           |
| MIR4712     | MIR4712   | 21.08468364 | 9.140321286 | 24.99996108 |             |
| 13.19855915 |           |             |             |             |             |
| MIR4709     | MIR4709   | 639.5687371 | 655.0563589 | 1508.033367 |             |
| 1112.449985 |           |             |             |             |             |
| MIR4707     | MIR4707   | 264.7299168 | 266.0849086 | 157.1426125 |             |
| 180.0660569 |           |             |             |             |             |
| MIR3198-2   | MIR3198-2 |             | 1023.778528 | 776.9273093 |             |
| 373.2137048 |           | 482.6901631 |             |             |             |
| MIR4698     | MIR4698   | 0           | 1.015591254 | 3.571423012 | 3.771016899 |
| MIR4695     | MIR4695   | 0           | 0           | 3.771016899 |             |
| MIR4691     | MIR4691   | 50.36896648 | 33.51451138 | 107.1426904 |             |
| 86.73338867 |           |             |             |             |             |
| MIR4690     | MIR4690   | 7.028227881 | 0           | 0           | 1.885508449 |

|             |             |             |             |             |
|-------------|-------------|-------------|-------------|-------------|
| LOC284023   | LOC284023   |             | 163.9919839 | 129.9956805 |
| 455.356434  | 350.7045716 |             |             |             |
| LINC00238   | LINC00238   |             | 0           | 1.015591254 |
|             | 9.427542247 |             |             | 0.892855753 |
| PWWP2B      | PWWP2B      | 10.54234182 | 23.35859884 | 163.3926028 |
| 155.5544471 |             |             |             |             |
| MY01H       | MY01H       | 14.05645576 | 11.17150379 | 24.10710533 |
| 9.427542247 |             |             |             |             |
| TFAP2E      | TFAP2E      | 19.91331233 | 18.28064257 | 41.07136464 |
| 63.16453306 |             |             |             |             |
| CDH20       | CDH20       | 1.171371313 | 0           | 6.249990271 |
| MRVI1       | MRVI1       | 2.342742627 | 0           | 0           |
| PPP4R1-AS1  | PPP4R1-AS1  |             | 2.342742627 | 0           |
|             | 4.713771124 |             |             | 3.571423012 |
| BET1L       | BET1L       | 2715.238705 | 3499.727461 | 9451.771002 |
| 5868.645049 |             |             |             |             |
| TCL1A       | TCL1A       | 0           | 0           | 0.942754225 |
| GNG4        | GNG4        | 2647.299168 | 888.6423473 | 528.5706058 |
| 720.2642277 |             |             |             |             |
| SCN8A       | SCN8A       | 4.685485254 | 1.015591254 | 7.142846024 |
| 29.22538097 |             |             |             |             |
| TARSL2      | TARSL2      | 709.851016  | 703.8047391 | 1201.783844 |
| 965.3803261 |             |             |             |             |
| HMOX2       | HMOX2       | 7275.387228 | 10926.7463  | 5132.134868 |
| 5918.611023 |             |             |             |             |
| SLC6A12     | SLC6A12     | 2.342742627 | 0           | 23.21424958 |
| PHOSPH02    | PHOSPH02    |             | 147.5927855 | 110.6994467 |
| 181.2497179 | 155.5544471 |             |             |             |
| B3GNT1      | B3GNT1      | 516.5747492 | 720.0541991 | 656.2489785 |
| 658.0424489 |             |             |             |             |
| AADAT       | AADAT       | 0           | 0.892855753 | 15.0840676  |
| GAPDH       | GAPDH       | 257343.2493 | 397868.0297 | 175414.0127 |
| 199476.4237 |             |             |             |             |
| P2RX4       | P2RX4       | 2298.230517 | 3037.633441 | 2155.353788 |
| 2375.740646 |             |             |             |             |
| ARMC4       | ARMC4       | 0           | 2.031182508 | 4.464278765 |
| MIOX        | MIOX        | 11.71371313 | 1.015591254 | 16.07140355 |
| 10.37029647 |             |             |             |             |
| CWF19L1     | CWF19L1     | 3610.166388 | 4025.803731 | 2818.745612 |
| 2724.559709 |             |             |             |             |
| HLA-DQA2    | HLA-DQA2    |             | 0           | 1.015591254 |
|             | 0           |             |             | 0.892855753 |
| SENP2       | SENP2       | 1629.377497 | 2070.790567 | 2419.639091 |
| 1987.325906 |             |             |             |             |
| SREBF1      | SREBF1      | 2163.522816 | 1708.224489 | 3371.423323 |
| 2871.629368 |             |             |             |             |
| ZNF211      | ZNF211      | 871.5002572 | 879.502026  | 2449.996186 |
| 2064.631752 |             |             |             |             |
| VKORC1      | VKORC1      | 2237.319209 | 3219.424275 | 2399.103408 |
| 2189.07531  |             |             |             |             |



|           |           |             |             |             |             |
|-----------|-----------|-------------|-------------|-------------|-------------|
| DSC2      | DSC2      | 0           | 0           | 3.571423012 | 3.771016899 |
| TBC1D1    | TBC1D1    | 2205.692183 |             | 1182.14822  | 1466.069146 |
|           |           | 1800.660569 |             |             |             |
| CUEDC1    | CUEDC1    | 0           | 7.109138778 | 3.571423012 | 0           |
| WDR44     | WDR44     | 1668.03275  |             | 1928.607791 | 1781.247227 |
|           |           | 2183.418784 |             |             |             |
| FAM86B2   | FAM86B2   | 0           | 0           | 7.142846024 | 3.771016899 |
| C18orf32  | C18orf32  |             |             | 2436.452332 | 2045.400786 |
|           |           | 2980.352504 | 2776.411192 |             |             |
| PAGE5     | PAGE5     | 5.856856567 |             | 19.29623383 | 15.1785478  |
|           |           | 14.14131337 |             |             |             |
| ZNF780B   | ZNF780B   | 284.6432292 |             | 129.9956805 | 315.1780808 |
|           |           | 376.1589357 |             |             |             |
| MEAF6     | MEAF6     | 4137.283479 |             | 4434.071415 | 6837.489357 |
|           |           | 6506.889659 |             |             |             |
| MYH7B     | MYH7B     | 242.4738619 |             | 170.6193307 | 192.8568427 |
|           |           | 210.2341921 |             |             |             |
| LRCH2     | LRCH2     | 0           | 0           | 0.892855753 | 3.771016899 |
| VSTM2L    | VSTM2L    | 2.342742627 |             | 1.015591254 | 0           |
|           |           |             |             |             | 0.942754225 |
| CAPN10    | CAPN10    | 1632.891611 |             | 1220.740687 | 1000.891299 |
|           |           | 1066.255028 |             |             |             |
| ADD3      | ADD3      | 15935.33535 |             | 14123.82757 | 11552.66059 |
|           |           | 12519.7761  |             |             |             |
| 6-Mar     | 6-Mar     | 4208.737129 |             | 2840.608738 | 3671.422856 |
|           |           | 3928.456854 |             |             |             |
| IFNAR2    | IFNAR2    | 6193.040134 |             | 5060.691219 | 3180.352192 |
|           |           | 4100.038123 |             |             |             |
| SSFA2     | SSFA2     | 1236.968107 |             | 713.9606516 | 656.2489785 |
|           |           | 525.1141032 |             |             |             |
| DHRS4-AS1 | DHRS4-AS1 |             |             | 707.5082733 | 1286.754119 |
|           |           | 1379.462138 | 1276.48922  |             |             |
| MESTIT1   | MESTIT1   | 0           | 0           | 0.892855753 | 0           |
| ZNF33A    | ZNF33A    | 1615.321041 |             | 1353.783142 | 2678.567259 |
|           |           | 2437.019671 |             |             |             |
| GPR180    | GPR180    | 2261.918006 |             | 1760.019643 | 1409.819234 |
|           |           | 1883.622941 |             |             |             |
| FKBP4     | FKBP4     | 6824.409272 |             | 6987.267828 | 9416.949627 |
|           |           | 7690.988965 |             |             |             |
| ZNF554    | ZNF554    | 117.1371313 |             | 263.0381348 | 808.0344565 |
|           |           | 334.6777498 |             |             |             |
| RPL28     | RPL28     | 3742.531347 |             | 3395.121562 | 4588.385715 |
|           |           | 3988.793125 |             |             |             |
| SEZ6L2    | SEZ6L2    | 0           | 0           | 21.42853807 | 0           |
| ALG1L2    | ALG1L2    | 19.91331233 |             | 21.32741634 | 8.92855753  |
|           |           | 7.542033798 |             |             |             |
| GPD2      | GPD2      | 1659.833151 |             | 1276.598206 | 1384.819273 |
|           |           | 1509.349514 |             |             |             |
| JAG2      | JAG2      | 14.05645576 |             | 8.124730032 | 25.89281684 |
|           |           | 32.99639787 |             |             |             |
| RUFY2     | RUFY2     | 2224.434124 |             | 2875.13884  | 3293.744873 |

|                 |               |   |             |              |
|-----------------|---------------|---|-------------|--------------|
| 2770.754666     |               |   |             |              |
| TMEM184A        | TMEM184A      |   | 71.45365012 | 32.49892013  |
| 44.64278765     | 66.93554995   |   |             |              |
| TXNIP TXNIP     | 11799.22324   |   | 11655.94082 | 35949.05118  |
| 29223.49546     |               |   |             |              |
| BFSP2 BFSP2     | 83.16736326   |   | 144.2139581 | 38.39279738  |
| 9.427542247     |               |   |             |              |
| CKMT2 CKMT2     | 26.94154021   |   | 14.21827756 | 11.60712479  |
| 3.771016899     |               |   |             |              |
| AP3B1 AP3B1     | 5309.826164   |   | 5201.858403 | 3370.530468  |
| 5031.479297     |               |   |             |              |
| ZNF80 ZNF80     | 74.96776406   |   | 49.76397145 | 74.99988325  |
| 134.8138541     |               |   |             |              |
| FBLN1 FBLN1     | 0 0           |   | 21.42853807 | 0            |
| ANKRD6 ANKRD6   | 142.9073002   |   | 112.7306292 | 291.9638312  |
| 192.3218618     |               |   |             |              |
| EXOSC4 EXOSC4   | 1584.865387   |   | 2752.252298 | 1586.604673  |
| 1541.403157     |               |   |             |              |
| PCDHB15 PCDHB15 | 0 3.046773762 | 0 | 0           | 0            |
| HIST1H3G        | HIST1H3G      |   | 133.5363297 | 90.38762161  |
| 16.96425931     | 23.56885562   |   |             |              |
| IVL IVL         | 0 0           | 0 | 7.542033798 |              |
| ITK ITK         | 13913.54846   |   | 13826.25933 | 24190.14092  |
| 22239.57216     |               |   |             |              |
| CDCA8 CDCA8     | 7034.084737   |   | 9136.258921 | 2984.816782  |
| 4527.105787     |               |   |             |              |
| RBFA RBFA       | 686.4235897   |   | 837.8627846 | 801.7844662  |
| 772.11571       |               |   |             |              |
| ADHFE1 ADHFE1   | 113.6230174   |   | 50.7795627  | 149.9997665  |
| 203.6349125     |               |   |             |              |
| BLNK BLNK       | 2.342742627   |   | 1.015591254 | 0 15.0840676 |
| FAM173B FAM173B | 825.816776    |   | 711.9294691 | 420.5350597  |
| 684.4395671     |               |   |             |              |
| FCAR FCAR       | 0 0           |   | 18.74997081 | 0            |
| THTPA THTPA     | 578.6574288   |   | 633.7289425 | 1377.676427  |
| 971.9796057     |               |   |             |              |
| LILRA6 LILRA6   | 39.82662466   |   | 28.43655511 | 11.60712479  |
| 46.19495701     |               |   |             |              |
| LENG1 LENG1     | 462.6916688   |   | 538.2633646 | 672.320382   |
| 580.7366024     |               |   |             |              |
| GNPTAB GNPTAB   | 7746.278496   |   | 14563.57858 | 5000.885073  |
| 4165.088165     |               |   |             |              |
| KDM4E KDM4E     | 0 0           | 0 | 10.37029647 |              |
| NXNL2 NXNL2     | 0 0           | 0 | 0.942754225 |              |
| NLGN3 NLGN3     | 25.7701689    |   | 21.32741634 | 38.39279738  |
| 42.42394011     |               |   |             |              |
| ALDH3A2 ALDH3A2 | 2589.901974   |   | 3828.779028 | 1526.783338  |
| 1725.240231     |               |   |             |              |
| PTEN PTEN       | 5426.963295   |   | 3749.56291  | 2600.888809  |
| 2970.618562     |               |   |             |              |

|             |         |             |             |             |
|-------------|---------|-------------|-------------|-------------|
| PROS1       | PROS1   | 64.42542224 | 61.9510665  | 50.89277792 |
| 108.4167358 |         |             |             |             |
| PLAGL2      | PLAGL2  | 4546.092068 | 3508.867783 | 3471.423168 |
| 4620.438455 |         |             |             |             |
| CACNG1      | CACNG1  | 0           | 2.031182508 | 0           |
| NCAM1       | NCAM1   | 2.342742627 | 15.23386881 | 12.49998054 |
| 23.56885562 |         |             |             |             |
| IL31RA      | IL31RA  | 0           | 0           | 1.785711506 |
| HEPACAM     | HEPACAM | 1.171371313 | 1.015591254 | 0.892855753 |
| 1.885508449 |         |             |             |             |
| PLCB1       | PLCB1   | 25.7701689  | 15.23386881 | 62.49990271 |
| 196.0928787 |         |             |             |             |
| PCDHGB1     | PCDHGB1 | 1.171371313 | 14.21827756 | 9.821413283 |
| 23.56885562 |         |             |             |             |
| PCDHGA9     | PCDHGA9 | 0           | 14.21827756 | 9.821413283 |
| ERP44       | ERP44   | 5743.23355  | 7054.296851 | 12.25580492 |
| 5664.067382 |         |             |             |             |
| MOSPD1      | MOSPD1  | 1369.333065 | 1976.34058  | 1474.997704 |
| 1296.287059 |         |             |             |             |
| COMMD10     | COMMD10 | 1622.349269 | 1676.74116  | 1160.712479 |
| 1433.929176 |         |             |             |             |
| COQ7        | COQ7    | 782.4760374 | 841.9251496 | 968.748492  |
| 805.1121079 |         |             |             |             |
| LMAN1L      | LMAN1L  | 5.856856567 | 0           | 0           |
| ZWILCH      | ZWILCH  | 5457.418949 | 5156.156797 | 2544.638896 |
| 3599.43563  |         |             |             |             |
| DHRS12      | DHRS12  | 268.2440308 | 289.4435074 | 716.9631697 |
| 718.3787192 |         |             |             |             |
| TMLHE       | TMLHE   | 333.8408243 | 424.5171442 | 435.7136075 |
| 393.1285117 |         |             |             |             |
| MICAL2      | MICAL2  | 7652.568791 | 6766.884526 | 2006.246877 |
| 3067.722247 |         |             |             |             |
| PRSS35      | PRSS35  | 0           | 0           | 33.92851862 |
| RPRD2       | RPRD2   | 3449.688518 | 3240.751692 | 25.45436407 |
| 3920.914821 |         |             |             | 4070.529378 |
| LRRC34      | LRRC34  | 107.7661608 | 112.7306292 | 39.28565313 |
| 38.65292321 |         |             |             |             |
| FBXW8       | FBXW8   | 590.371142  | 477.3278894 | 549.9991439 |
| 567.5380433 |         |             |             |             |
| PSTK        | PSTK    | 167.5060978 | 186.8687907 | 214.2853807 |
| 145.1841506 |         |             |             |             |
| GRPEL1      | GRPEL1  | 4197.023416 | 5754.340045 | 5529.455679 |
| 4905.150231 |         |             |             |             |
| TRIB1       | TRIB1   | 6748.270137 | 5836.602937 | 1120.53397  |
| 1580.998835 |         |             |             |             |
| MED28       | MED28   | 2386.083366 | 2400.857725 | 2823.209891 |
| 2862.201826 |         |             |             |             |
| ITPKC       | ITPKC   | 787.1615226 | 847.0031059 | 1503.569088 |
| 1029.487613 |         |             |             |             |
| HSD3B7      | HSD3B7  | 107.7661608 | 345.3010264 | 174.1068718 |

|             |             |             |             |             |             |
|-------------|-------------|-------------|-------------|-------------|-------------|
| 67.87830418 |             |             |             |             |             |
| MED29       | MED29       | 4335.245231 | 4961.163276 | 5410.705863 |             |
| 4307.444053 |             |             |             |             |             |
| KIF16B      | KIF16B      | 217.8750643 | 350.3789826 | 475.8921164 |             |
| 543.9691877 |             |             |             |             |             |
| GZMK        | GZMK        | 286.9859718 | 68.04461402 | 455.356434  |             |
| 482.6901631 |             |             |             |             |             |
| RBMXL1      | RBMXL1      | 1290.851187 | 1118.165971 | 2028.568271 |             |
| 1753.522858 |             |             |             |             |             |
| RPS10-NUDT3 | RPS10-NUDT3 |             | 12145.94915 | 15407.53492 |             |
| 14660.69146 |             | 11973.92141 |             |             |             |
| TAF7L       | TAF7L       | 12.88508445 | 4.062365016 | 0           | 3.771016899 |
| FAM49B      | FAM49B      | 11173.71096 | 13754.15235 | 7938.3805   |             |
| 10160.06228 |             |             |             |             |             |
| HTR2C       | HTR2C       | 0           | 0           | 0.892855753 | 0           |
| TAMM41      | TAMM41      | 1020.264414 | 1200.428862 | 1460.712012 |             |
| 1214.267441 |             |             |             |             |             |
| NOLC1       | NOLC1       | 11273.27752 | 14893.64574 | 16042.83217 |             |
| 16205.94512 |             |             |             |             |             |
| FASTKD5     | FASTKD5     | 4721.797765 | 5153.110023 | 3641.958617 |             |
| 3793.643    |             |             |             |             |             |
| NIF3L1      | NIF3L1      | 2338.057142 | 2634.443713 | 2393.746274 |             |
| 2034.463617 |             |             |             |             |             |
| MRPS35      | MRPS35      | 4826.049811 | 5346.072361 | 4358.028931 |             |
| 4672.289938 |             |             |             |             |             |
| HAPLN2      | HAPLN2      | 0           | 4.062365016 | 0.892855753 | 3.771016899 |
| NUBPL       | NUBPL       | 523.6029771 | 535.2165909 | 412.4993579 |             |
| 563.7670264 |             |             |             |             |             |
| HNRNPLL     | HNRNPLL     | 7896.214024 | 8380.659028 | 5208.027607 |             |
| 7260.150285 |             |             |             |             |             |
| REEP6       | REEP6       | 56.22582305 | 107.6526729 | 264.2853029 |             |
| 181.0088111 |             |             |             |             |             |
| PABPC3      | PABPC3      | 9.370970508 | 7.109138778 | 5.357134518 | 0           |
| TRIM66      | TRIM66      | 188.5907815 | 52.81074521 | 74.1070275  |             |
| 112.1877527 |             |             |             |             |             |
| PSMD6       | PSMD6       | 8842.682045 | 10646.44312 | 8349.094147 |             |
| 8154.824044 |             |             |             |             |             |
| LRIG2       | LRIG2       | 858.6151728 | 870.3617047 | 1223.212382 |             |
| 1270.832695 |             |             |             |             |             |
| ECHDC1      | ECHDC1      | 4729.997364 | 5487.239546 | 4097.315051 |             |
| 4185.828758 |             |             |             |             |             |
| PPP1R26     | PPP1R26     | 39.82662466 | 43.67042392 | 49.10706642 |             |
| 82.01961755 |             |             |             |             |             |
| HEPH        | HEPH        | 10.54234182 | 3.046773762 | 0.892855753 |             |
| 15.0840676  |             |             |             |             |             |
| FAM25C      | FAM25C      | 0           | 0           | 1.785711506 | 0           |
| HES7        | HES7        | 0           | 1.015591254 | 0           | 0           |
| MYPN        | MYPN        | 0           | 0           | 69.64274874 | 0           |
| DPY30       | DPY30       | 3077.19244  | 3159.504391 | 2399.103408 |             |
| 2722.674201 |             |             |             |             |             |

|             |             |             |             |             |
|-------------|-------------|-------------|-------------|-------------|
| RAB11A      | RAB11A      | 7930.183792 | 9214.459448 | 6737.489512 |
| 8077.518197 |             |             |             |             |
| AMPH        | AMPH        | 23.42742627 | 13.2026863  | 11.60712479 |
| 38.65292321 |             |             |             |             |
| TRADD       | TRADD       | 4282.533522 | 5606.063722 | 3368.744756 |
| 3017.756273 |             |             |             |             |
| CTS0        | CTS0        | 957.0103631 | 755.599893  | 1833.925717 |
| 2015.608532 |             |             |             |             |
| RBBP8       | RBBP8       | 4515.636413 | 4909.368122 | 2098.21102  |
| 2659.509668 |             |             |             |             |
| CCT7        | CCT7        | 23992.02724 | 32730.47494 | 21987.46577 |
| 21304.35997 |             |             |             |             |
| KIAA0907    | KIAA0907    |             | 1014.407557 | 435.688648  |
| 844.6415424 | 824.9099466 |             |             |             |
| MLXIPL      | MLXIPL      | 0           | 2.678567259 | 0           |
|             |             | 0           |             |             |
| CASP2       | CASP2       | 5087.265614 | 3041.695806 | 1933.032705 |
| 3112.031696 |             |             |             |             |
| WDR66       | WDR66       | 11.71371313 | 6.093547524 | 1.785711506 |
| 0.942754225 |             |             |             |             |
| UHRF1BP1L   | UHRF1BP1L   |             | 4074.029428 | 4710.312236 |
| 3484.816004 | 3333.578939 |             |             |             |
| ZNF431      | ZNF431      | 837.5304891 | 528.1074521 | 1116.069691 |
| 1063.426765 |             |             |             |             |
| TMEM185B    | TMEM185B    |             | 1304.907643 | 1280.660571 |
| 1730.354449 | 1596.082902 |             |             |             |
| CCDC74B     | CCDC74B     | 1.171371313 | 14.21827756 | 8.035701777 |
| 12.25580492 |             |             |             |             |
| C17orf49    | C17orf49    |             | 10969.89235 | 13488.06745 |
| 7463.38124  | 6849.109443 |             |             |             |
| BTG3        | BTG3        | 2452.85153  | 2663.895859 | 1816.961457 |
| 1832.714213 |             |             |             |             |
| ZNF720      | ZNF720      | 1071.804752 | 896.7670773 | 733.0345732 |
| 860.7346072 |             |             |             |             |
| C5orf24     | C5orf24     | 1315.449985 | 1151.680482 | 1402.676388 |
| 1597.968411 |             |             |             |             |
| RBBP4       | RBBP4       | 24568.34193 | 25993.04256 | 19987.46889 |
| 22224.48809 |             |             |             |             |
| NRCAM       | NRCAM       | 2.342742627 | 2.031182508 | 1.785711506 |
| 71.64932108 |             |             |             |             |
| KCNE3       | KCNE3       | 38.65525334 | 11.17150379 | 3.571423012 |
| 5.656525348 |             |             |             |             |
| ELP5        | ELP5        | 3739.017233 | 5067.800358 | 4039.279427 |
| 3541.927622 |             |             |             |             |
| MTRNR2L8    | MTRNR2L8    |             | 7.028227881 | 1.015591254 |
| 1.785711506 | 7.542033798 |             |             |             |
| CUL4B       | CUL4B       | 3570.339763 | 2232.269576 | 3134.816549 |
| 3167.654195 |             |             |             |             |
| VEGFB       | VEGFB       | 370.1533351 | 279.2875949 | 690.1774971 |
| 683.4968129 |             |             |             |             |
| TCEA1       | TCEA1       | 7059.854906 | 7125.388238 | 6639.27538  |

|             |             |             |             |             |
|-------------|-------------|-------------|-------------|-------------|
| 7615.568627 |             |             |             |             |
| PPP1R12A    | PPP1R12A    |             | 9195.264811 | 9221.568587 |
| 7505.34546  | 8579.063445 |             |             |             |
| SNORD107    | SNORD107    |             | 9.370970508 | 5.07795627  |
| 75.89273901 | 23.56885562 |             |             |             |
| TNFRSF9     | TNFRSF9     |             | 2189.292985 | 6397.209309 |
| 5621.643442 |             |             |             | 7524.095431 |
| RAE1        | RAE1        | 4870.561921 | 6717.120554 | 4756.242596 |
| 4380.978882 |             |             |             |             |
| C5orf51     | C5orf51     | 2072.155854 | 1353.783142 | 1592.854663 |
| 2214.529674 |             |             |             |             |
| SNX20       | SNX20       | 5731.519837 | 5240.450871 | 3634.815771 |
| 4569.529727 |             |             |             |             |
| SHMT1       | SHMT1       | 5810.001715 | 7291.945204 | 2973.209658 |
| 3405.22826  |             |             |             |             |
| SLC35E2     | SLC35E2     | 1029.635385 | 1300.972396 | 1469.640569 |
| 833.3947346 |             |             |             |             |
| LILRA1      | LILRA1      | 1.171371313 | 1.015591254 | 0           |
| TCP11       | TCP11       | 0           | 11.17150379 | 0           |
| MIR22HG     | MIR22HG     | 240.1311193 | 389.9870416 | 491.9635199 |
| 323.3646991 |             |             |             |             |
| MAEL        | MAEL        | 28.11291152 | 0           | 0           |
| GK5         | GK5         | 639.5687371 | 474.2811156 | 74.47758375 |
| 564.7097806 |             |             |             | 193.7496984 |
| BMS1P20     | BMS1P20     | 1041.349098 | 1345.658412 | 723.21316   |
| 990.8346902 |             |             |             |             |
| LCK         | LCK         | 62612.13945 | 85753.47872 | 43491.89659 |
| 45226.74842 |             |             |             |             |
| FIGNL1      | FIGNL1      | 3367.692526 | 3003.103338 | 1769.640103 |
| 2616.142974 |             |             |             |             |
| C17orf89    | C17orf89    |             | 2551.246721 | 3997.367176 |
| 2510.710378 | 1921.33311  |             |             |             |
| FAM224A     | FAM224A     | 1.171371313 | 0           | 0           |
| PCBP1-AS1   | PCBP1-AS1   |             | 263.5585455 | 4.713771124 |
| 372.320849  | 367.6741476 |             |             | 204.1338421 |
| CCDC94      | CCDC94      | 1641.09121  | 1975.324989 | 1458.9263   |
| 1535.746632 |             |             |             |             |
| MRPL20      | MRPL20      | 3898.323731 | 5347.087953 | 4688.385559 |
| 3769.13139  |             |             |             |             |
| MLH3        | MLH3        | 727.4215857 | 391.0026328 | 518.7491925 |
| 1129.419561 |             |             |             |             |
| ISPD        | ISPD        | 31.62702546 | 51.79515396 | 49.10706642 |
| 72.5920753  |             |             |             |             |
| KBTBD13     | KBTBD13     | 0           | 1.015591254 | 0           |
| FAM111B     | FAM111B     | 5381.279814 | 3095.522142 | 0           |
| 3260.044109 |             |             |             | 1635.71174  |
| ZADH2       | ZADH2       | 822.302662  | 1061.29286  | 1565.176135 |
| 835.2802431 |             |             |             |             |
| ZNF800      | ZNF800      | 2176.4079   | 1560.963757 | 3563.38731  |
| 2828.262674 |             |             |             |             |

|             |         |             |   |             |             |
|-------------|---------|-------------|---|-------------|-------------|
| AGR3        | AGR3    | 0           | 0 | 1.785711506 | 1.885508449 |
| SP8         | SP8     | 1.171371313 |   | 0           | 3.571423012 |
| SNORA35     | SNORA35 | 0           | 0 | 2.678567259 | 0           |
| CKLF        | CKLF    | 5367.223358 |   | 4630.080527 | 2082.139616 |
| 3237.418008 |         |             |   |             |             |
| PLEKH02     | PLEKH02 | 4205.223015 |   | 5142.954111 | 3337.494805 |
| 3057.351951 |         |             |   |             |             |
| KCNJ18      | KCNJ18  | 4.685485254 |   | 14.21827756 | 0           |
| TMEM87A     | TMEM87A | 4290.733121 |   | 5964.567435 | 6095.526226 |
| 5461.375224 |         |             |   |             |             |
| GTF2A1      | GTF2A1  | 829.3308899 |   | 467.1719769 | 793.7487644 |
| 735.3482953 |         |             |   |             |             |
| OTUD4       | OTUD4   | 3381.748982 |   | 2122.585721 | 2769.638546 |
| 3123.344746 |         |             |   |             |             |
| FAF2        | FAF2    | 6818.552416 |   | 6905.004936 | 4868.742421 |
| 5426.493317 |         |             |   |             |             |
| PNISR       | PNISR   | 3093.591639 |   | 2418.122776 | 5024.099322 |
| 5053.162644 |         |             |   |             |             |
| GPR162      | GPR162  | 1.171371313 |   | 0           | 2.678567259 |
| C2CD2       | C2CD2   | 324.4698538 |   | 188.8999733 | 506.249212  |
| 396.8995286 |         |             |   |             |             |
| RIC8A       | RIC8A   | 8228.883477 |   | 10471.76142 | 11258.91105 |
| 8888.286831 |         |             |   |             |             |
| ODF3        | ODF3    | 0           | 0 | 3.571423012 | 0           |
| EXD1        | EXD1    | 0           | 0 | 11.60712479 | 0           |
| EARS2       | EARS2   | 1771.113426 |   | 1882.906185 | 1641.068874 |
| 1760.122138 |         |             |   |             |             |
| ALG2        | ALG2    | 2690.639907 |   | 3478.400045 | 3727.672769 |
| 3109.203433 |         |             |   |             |             |
| ANKLE1      | ANKLE1  | 158.1351273 |   | 414.3612317 | 299.999533  |
| 73.53482953 |         |             |   |             |             |
| U2AF1       | U2AF1   | 7608.056681 |   | 6380.959849 | 5755.348184 |
| 5208.717092 |         |             |   |             |             |
| GGCX        | GGCX    | 3078.363812 |   | 2730.924882 | 2878.566948 |
| 3357.147794 |         |             |   |             |             |
| GPR183      | GPR183  | 4213.422615 |   | 4032.91287  | 7938.3805   |
| 11840.05031 |         |             |   |             |             |
| EPYC        | EPYC    | 3.51411394  |   | 0           | 0           |
| HUS1        | HUS1    | 1696.145662 |   | 2208.910978 | 2020.532569 |
| 2078.773066 |         |             |   |             |             |
| NPPB        | NPPB    | 0           | 0 | 0           | 1.885508449 |
| HMGA2       | HMGA2   | 1.171371313 |   | 0           | 0.942754225 |
| TXNRD1      | TXNRD1  | 14274.33083 |   | 17731.2077  | 16561.58136 |
| 12552.7725  |         |             |   |             |             |
| VAMP1       | VAMP1   | 1905.821127 |   | 1385.266471 | 1757.140122 |
| 1996.753448 |         |             |   |             |             |
| HIRA        | HIRA    | 3570.339763 |   | 2679.129728 | 2311.603545 |
| 1132.247824 |         |             |   |             |             |
| ZCCHC2      | ZCCHC2  | 584.5142854 |   | 420.4547792 | 717.8560254 |
| 671.241008  |         |             |   |             |             |

|             |         |             |             |             |
|-------------|---------|-------------|-------------|-------------|
| L3MBTL1     | L3MBTL1 | 134.707701  | 46.71719769 | 160.7140355 |
| 112.1877527 |         |             |             |             |
| KBTBD2      | KBTBD2  | 3227.127969 | 3018.337207 | 3730.351336 |
| 3958.62499  |         |             |             |             |
| UBIAD1      | UBIAD1  | 2409.510792 | 3325.045766 | 4265.171932 |
| 3777.616178 |         |             |             |             |
| PRRC2B      | PRRC2B  | 4930.301858 | 1283.707345 | 2050.889665 |
| 2820.72064  |         |             |             |             |
| MIER2       | MIER2   | 479.0908672 | 359.5193039 | 344.6423207 |
| 415.7546131 |         |             |             |             |
| ANKDD1A     | ANKDD1A | 602.0848551 | 479.3590719 | 389.2851083 |
| 376.1589357 |         |             |             |             |
| EIF4G1      | EIF4G1  | 16897.0312  | 13734.85612 | 11671.4104  |
| 11981.46344 |         |             |             |             |
| ZNF641      | ZNF641  | 783.6474087 | 830.7536458 | 1252.676622 |
| 1261.405153 |         |             |             |             |
| ZNF764      | ZNF764  | 573.9719436 | 530.1386346 | 936.6056849 |
| 765.5164305 |         |             |             |             |
| BAAT        | BAAT    | 5.856856567 | 0           | 0           |
| TPRN        | TPRN    | 39.82662466 | 35.54569389 | 37.49994163 |
| 35.82466054 |         |             |             |             |
| TMTC4       | TMTC4   | 866.814772  | 1121.212744 | 974.9984823 |
| 807.9403706 |         |             |             |             |
| C4orf48     | C4orf48 | 801.2179784 | 842.9407409 | 308.9280905 |
| 367.6741476 |         |             |             |             |
| TNRC6C      | TNRC6C  | 894.9276835 | 421.4703704 | 1478.569127 |
| 1336.825491 |         |             |             |             |
| SUGCT       | SUGCT   | 8.199599194 | 2.031182508 | 7.142846024 |
| 25.45436407 |         |             |             |             |
| CBR4        | CBR4    | 1129.201946 | 914.0321286 | 732.1417175 |
| 1024.773842 |         |             |             |             |
| F8          | F8      | 629.0263953 | 568.7311023 | 759.8202458 |
| 768.3446931 |         |             |             |             |
| HTR7        | HTR7    | 1.171371313 | 19.29623383 | 0           |
| CARD8       | CARD8   | 4602.317891 | 4185.251558 | 5011.599342 |
| 4541.2471   |         |             |             |             |
| XPNPEP2     | XPNPEP2 | 92.53833376 | 165.5413744 | 9.821413283 |
| 12.25580492 |         |             |             |             |
| ZFP36       | ZFP36   | 4117.370167 | 3474.33768  | 6956.239172 |
| 5652.754331 |         |             |             |             |
| OFD1        | OFD1    | 1002.693844 | 929.2659975 | 2912.495466 |
| 2541.66539  |         |             |             |             |
| YWHAB       | YWHAB   | 27784.92756 | 31783.94389 | 20169.61146 |
| 24236.32561 |         |             |             |             |
| CAPZA1      | CAPZA1  | 35913.0731  | 42399.91927 | 24294.60504 |
| 27659.4662  |         |             |             |             |
| CLDN7       | CLDN7   | 76.13913537 | 63.98224901 | 105.3569789 |
| 94.27542247 |         |             |             |             |
| DPH2        | DPH2    | 4103.313711 | 5833.556163 | 4887.492392 |
| 4302.730282 |         |             |             |             |



|                 |              |             |               |   |  |
|-----------------|--------------|-------------|---------------|---|--|
| DPAGT1 DPAGT1   | 4655.0296    | 6306.821688 | 4224.100568   |   |  |
| 4603.468879     |              |             |               |   |  |
| ZNF132 ZNF132   | 181.5625536  | 173.6661044 | 222.3210825   |   |  |
| 218.7189801     |              |             |               |   |  |
| CCDC88A CCDC88A | 188.5907815  | 169.6037394 | 389.2851083   |   |  |
| 195.1501245     |              |             |               |   |  |
| EIF4EBP2        | EIF4EBP2     | 9780.950467 | 8203.94615    |   |  |
| 7409.809894     | 7866.341251  |             |               |   |  |
| CDCA4 CDCA4     | 5108.350298  | 5506.535779 | 4237.493404   |   |  |
| 4218.825156     |              |             |               |   |  |
| MTCH2 MTCH2     | 8377.647634  | 10811.98449 | 4667.849877   |   |  |
| 6018.542971     |              |             |               |   |  |
| SEC24B-AS1      | SEC24B-AS1   | 56.22582305 | 50.7795627    |   |  |
| 65.17846997     | 57.50800771  |             |               |   |  |
| PPP1R8 PPP1R8   | 3206.043285  | 853.0966534 | 1518.747636   |   |  |
| 1098.308672     |              |             |               |   |  |
| KIF23 KIF23     | 6215.296189  | 6111.828167 | 1814.28289    |   |  |
| 3257.215846     |              |             |               |   |  |
| SUN1 SUN1       | 2388.426108  | 1959.075529 | 3815.172633   |   |  |
| 3774.787916     |              |             |               |   |  |
| SUM01 SUM01     | 10780.1302   | 11809.2951  | 7849.094925   |   |  |
| 8507.414124     |              |             |               |   |  |
| UBE2I UBE2I     | 7960.639446  | 5842.696485 | 5039.27787    |   |  |
| 5561.307172     |              |             |               |   |  |
| UBE2H UBE2H     | 3332.551387  | 2896.466257 | 4325.886123   |   |  |
| 3105.432416     |              |             |               |   |  |
| ADAMTS15        | ADAMTS15     | 1.171371313 | 0 0 0         |   |  |
| LINC00152       | LINC00152    | 3778.843857 | 3209.268363   |   |  |
| 1533.926184     | 2027.864337  |             |               |   |  |
| LINC00974       | LINC00974    | 0 0         | 0.892855753   | 0 |  |
| LINC00965       | LINC00965    | 1.171371313 | 0 0           | 0 |  |
| LOC100270804    | LOC100270804 | 92.53833376 | 35.54569389   |   |  |
| 183.0354294     | 210.2341921  |             |               |   |  |
| MGC12916        | MGC12916     | 1819.13965  | 1784.393833   |   |  |
| 240.1781976     | 555.2822384  |             |               |   |  |
| DNASE1L1        | DNASE1L1     | 1027.292642 | 811.457412    |   |  |
| 809.820168      | 979.5216395  |             |               |   |  |
| MYH2 MYH2       | 0 0          | 4.464278765 | 4.713771124   |   |  |
| MSS51 MSS51     | 17.5705697   | 24.3741901  | 43.7499319    |   |  |
| 13.19855915     |              |             |               |   |  |
| ACTR3B ACTR3B   | 235.445634   | 246.7886747 | 619.6418926   |   |  |
| 537.3699081     |              |             |               |   |  |
| ELF1 ELF1       | 10887.89636  | 8408.079992 | 16037.47504   |   |  |
| 13162.73449     |              |             |               |   |  |
| ARNTL ARNTL     | 2722.266932  | 2417.107185 | 3775.88698    |   |  |
| 4558.216676     |              |             |               |   |  |
| PODNL1 PODNL1   | 1.171371313  | 12.18709505 | 0 2.828262674 |   |  |
| CCDC134 CCDC134 | 506.0324074  | 443.813378  | 372.320849    |   |  |
| 487.4039342     |              |             |               |   |  |
| ATP1B3 ATP1B3   | 11938.61643  | 13537.83142 | 9230.342775   |   |  |

|                 |                 |             |             |             |             |
|-----------------|-----------------|-------------|-------------|-------------|-------------|
| 10351.44139     |                 |             |             |             |             |
| ZEB1            | ZEB1            | 3549.25508  | 2922.871629 | 3974.993812 |             |
| 3997.277913     |                 |             |             |             |             |
| TNFAIP8L2-SCNM1 | TNFAIP8L2-SCNM1 | 2567.645919 | 3660.19088  |             |             |
| 2885.709794     |                 | 2277.694207 |             |             |             |
| LHPP            | LHPP            | 286.9859718 | 360.5348952 | 269.6424374 |             |
| 328.0784702     |                 |             |             |             |             |
| PAIP1           | PAIP1           | 2920.228684 | 3080.288274 | 3228.566403 |             |
| 3148.799111     |                 |             |             |             |             |
| CPSF4           | CPSF4           | 2416.53902  | 2392.732995 | 2080.353905 |             |
| 1720.52646      |                 |             |             |             |             |
| MS4A13          | MS4A13          | 0           | 0           | 1.785711506 | 2.828262674 |
| MVD             | MVD             | 3024.480731 | 4386.338626 | 2232.139383 |             |
| 2551.092932     |                 |             |             |             |             |
| COX4I1          | COX4I1          | 16342.97257 | 20465.17936 | 14947.29816 |             |
| 12989.26771     |                 |             |             |             |             |
| SLC31A1         | SLC31A1         | 1453.6718   | 1736.661044 | 1216.069536 |             |
| 1087.938375     |                 |             |             |             |             |
| GRIK4           | GRIK4           | 10.54234182 | 11.17150379 | 31.24995136 |             |
| 47.13771124     |                 |             |             |             |             |
| ZNF714          | ZNF714          | 1914.020726 | 1220.740687 | 733.0345732 |             |
| 828.6809635     |                 |             |             |             |             |
| CFAP99          | CFAP99          | 0           | 0           | 7.142846024 | 0           |
| TYW1B           | TYW1B           | 387.7239048 | 117.8085855 | 388.3922526 |             |
| 494.945968      |                 |             |             |             |             |
| RFX4            | RFX4            | 3.51411394  | 15.23386881 | 5.357134518 |             |
| 7.542033798     |                 |             |             |             |             |
| CDKN2D          | CDKN2D          | 1951.504608 | 2507.494806 | 3277.673469 |             |
| 2444.561705     |                 |             |             |             |             |
| TRMT2B          | TRMT2B          | 2191.635727 | 1745.801366 | 2374.103447 |             |
| 2006.18099      |                 |             |             |             |             |
| ZBTB48          | ZBTB48          | 975.7523041 | 1009.497707 | 1395.533542 |             |
| 1086.052867     |                 |             |             |             |             |
| MSRB2           | MSRB2           | 392.40939   | 418.4235967 | 416.0707809 |             |
| 346.9335547     |                 |             |             |             |             |
| NUBP2           | NUBP2           | 4564.834009 | 6830.866775 | 4218.743433 |             |
| 3834.181432     |                 |             |             |             |             |
| DDX27           | DDX27           | 4712.426794 | 5845.743258 | 5879.455134 |             |
| 5672.55217      |                 |             |             |             |             |
| NEFH            | NEFH            | 503.6896648 | 423.5015529 | 433.0350402 |             |
| 426.1249096     |                 |             |             |             |             |
| RDH14           | RDH14           | 992.1515025 | 1055.199313 | 1971.425503 |             |
| 1659.247436     |                 |             |             |             |             |
| INPP5E          | INPP5E          | 930.0688229 | 834.8160108 | 1004.462722 |             |
| 926.7274029     |                 |             |             |             |             |
| CAMSAP2         | CAMSAP2         | 101.9093043 | 51.79515396 | 207.1425347 |             |
| 122.5580492     |                 |             |             |             |             |
| TEPP            | TEPP            | 0           | 6.093547524 | 61.60704696 | 19.79783872 |
| SCARA5          | SCARA5          | 0           | 0           | 3.571423012 | 0           |
| PPARD           | PPARD           | 1176.056799 | 832.7848283 | 969.6413478 |             |

|              |              |             |             |             |             |
|--------------|--------------|-------------|-------------|-------------|-------------|
| 865.4483783  |              |             |             |             |             |
| GPHN         | GPHN         | 811.7603202 | 706.8515128 | 558.0348456 |             |
| 810.7686333  |              |             |             |             |             |
| SYCP2        | SYCP2        | 224.9032922 | 53.82633646 | 82.14272928 |             |
| 202.6921583  |              |             |             |             |             |
| CNPY2        | CNPY2        | 5237.201142 | 7141.637698 | 4558.921475 |             |
| 4541.2471    |              |             |             |             |             |
| MY01A        | MY01A        | 12.88508445 | 11.17150379 | 74.99988325 |             |
| 44.30944856  |              |             |             |             |             |
| ARMCX3       | ARMCX3       | 2244.347437 | 2148.991094 | 4209.814876 |             |
| 3619.233469  |              |             |             |             |             |
| SLC25A10     | SLC25A10     |             | 2157.665959 | 3183.878581 |             |
| 1131.248239  | 1494.265446  |             |             |             |             |
| GDPD1        | GDPD1        | 76.13913537 | 35.54569389 | 65.17846997 |             |
| 90.50440557  |              |             |             |             |             |
| TBX20        | TBX20        | 8.199599194 | 1.015591254 | 0           | 0           |
| S1PR5        | S1PR5        | 0           | 0           | 125.8926612 | 83.905126   |
| TLCD2        | TLCD2        | 8.199599194 | 2.031182508 | 0           | 3.771016899 |
| BHLHA9       | BHLHA9       | 0           | 1.015591254 | 0           | 0           |
| PGR          | PGR          | 1.171371313 | 0           | 0           | 0           |
| TSEN54       | TSEN54       | 2712.895962 | 3732.297859 | 2989.281061 |             |
| 3095.06212   |              |             |             |             |             |
| C3orf35      | C3orf35      | 2.342742627 | 1.015591254 | 0           | 4.713771124 |
| GPAT2        | GPAT2        | 550.5445173 | 1325.346587 | 938.3913964 |             |
| 775.8867269  |              |             |             |             |             |
| IFF02        | IFF02        | 390.0666474 | 165.5413744 | 309.8209463 |             |
| 354.4755885  |              |             |             |             |             |
| AKIRIN1      | AKIRIN1      | 6655.731803 | 6877.583972 | 7730.34511  |             |
| 7566.545408  |              |             |             |             |             |
| PMS2CL       | PMS2CL       | 261.2158029 | 274.2096386 | 555.3562784 |             |
| 355.4183427  |              |             |             |             |             |
| NUDT4P1      | NUDT4P1      | 4063.487086 | 4798.668675 | 4063.386532 |             |
| 3902.059736  |              |             |             |             |             |
| GTF2IP1      | GTF2IP1      | 258.8730603 | 234.6015797 | 201.7854002 |             |
| 236.6313104  |              |             |             |             |             |
| LOC100288162 | LOC100288162 |             | 333.8408243 | 68.04461402 |             |
| 227.678217   | 239.4595731  |             |             |             |             |
| CAND1.11     | CAND1.11     |             | 0           | 0           | 0           |
| GIMAP6       | GIMAP6       | 8067.234236 | 6261.120081 | 8665.165083 | 0.942754225 |
| 7590.114263  |              |             |             |             |             |
| STPG2        | STPG2        | 1.171371313 | 3.046773762 | 3.571423012 |             |
| 18.85508449  |              |             |             |             |             |
| FAM49A       | FAM49A       | 73.79639275 | 28.43655511 | 58.03562395 |             |
| 327.135716   |              |             |             |             |             |
| C19orf52     | C19orf52     |             | 1265.081019 | 1726.505132 |             |
| 1516.961924  | 1168.072484  |             |             |             |             |
| TP53I13      | TP53I13      | 1765.256569 | 1733.614271 | 1424.997782 |             |
| 1425.444388  |              |             |             |             |             |
| NCOR1        | NCOR1        | 9197.607553 | 9550.620153 | 8579.450931 |             |
| 9378.519027  |              |             |             |             |             |

|                           |               |             |             |
|---------------------------|---------------|-------------|-------------|
| PDXDC1 PDXDC1             | 6201.239733   | 7240.15005  | 8163.38015  |
| 6456.923685               |               |             |             |
| TTPAL TTPAL               | 2700.010878   | 1671.663204 | 1441.962041 |
| 2441.733442               |               |             |             |
| SLC27A3 SLC27A3           | 349.0686514   | 451.9381081 | 441.070742  |
| 303.5668604               |               |             |             |
| UBE2F UBE2F               | 7517.86109    | 8192.774646 | 3436.601793 |
| 4096.267106               |               |             |             |
| ZC3H13 ZC3H13             | 3578.539363   | 2894.435074 | 3825.886902 |
| 3641.85957                |               |             |             |
| SPTLC1 SPTLC1             | 4677.285655   | 5793.948104 | 4534.81437  |
| 4372.494094               |               |             |             |
| LOC100505984 LOC100505984 | 0 0           | 0 0         | 1.785711506 |
| 1.885508449               |               |             |             |
| MIF4GD MIF4GD             | 4120.884281   | 4410.712816 | 3762.494143 |
| 3489.133386               |               |             |             |
| FBX044 FBX044             | 390.0666474   | 383.893494  | 653.5704112 |
| 714.6077023               |               |             |             |
| ASB7 ASB7                 | 1906.992498   | 1797.59652  | 2366.960601 |
| 2225.842725               |               |             |             |
| CFAP43 CFAP43             | 4.685485254   | 3.046773762 | 20.53568232 |
| 8.484788022               |               |             |             |
| ARL14 ARL14               | 0 2.031182508 | 0 0         | 0           |
| SEMA4C SEMA4C             | 99.56656164   | 108.6682642 | 265.1781587 |
| 195.1501245               |               |             |             |
| LARP1 LARP1               | 4849.477238   | 2696.39478  | 3220.530701 |
| 3181.795508               |               |             |             |
| FANCE FANCE               | 1296.708044   | 1149.6493   | 1078.56975  |
| 1047.399944               |               |             |             |
| HECW2 HECW2               | 73.79639275   | 67.02902277 | 24.10710533 |
| 84.84788022               |               |             |             |
| ARMC5 ARMC5               | 1044.863212   | 908.9541724 | 673.2132378 |
| 692.9243552               |               |             |             |
| NCAPG2 NCAPG2             | 11013.23309   | 9963.965793 | 4094.636483 |
| 5894.099413               |               |             |             |
| IN080D IN080D             | 1211.197938   | 927.2348149 | 1221.42667  |
| 1173.72901                |               |             |             |
| ZNF667 ZNF667             | 4.685485254   | 13.2026863  | 127.6783727 |
| 31.11088942               |               |             |             |
| CHTF18 CHTF18             | 2328.686171   | 2400.857725 | 1670.533114 |
| 1765.778663               |               |             |             |
| TMSB15A TMSB15A           | 26.94154021   | 10.15591254 | 1.785711506 |
| 16.96957604               |               |             |             |
| GPR27 GPR27               | 99.56656164   | 55.85751897 | 12.49998054 |
| 59.39351616               |               |             |             |
| WDR5B WDR5B               | 178.0484396   | 109.6838554 | 696.4274874 |
| 689.1533383               |               |             |             |
| BRWD3 BRWD3               | 372.4960777   | 112.7306292 | 319.6423596 |
| 198.9211414               |               |             |             |
| CENPM CENPM               | 5426.963295   | 7040.078573 | 2511.603233 |

|             |             |             |             |             |             |
|-------------|-------------|-------------|-------------|-------------|-------------|
| 2825.434411 |             |             |             |             |             |
| TAC3        | TAC3        | 7.028227881 | 0           | 2.678567259 | 1.885508449 |
| PUSL1       | PUSL1       | 1642.262581 | 2048.447559 | 1180.355306 |             |
| 1263.290661 |             |             |             |             |             |
| GGT6        | GGT6        | 1.171371313 | 2.031182508 | 0           | 0           |
| MYOF        | MYOF        | 1947.990494 | 1235.974556 | 565.1776917 |             |
| 459.1213074 |             |             |             |             |             |
| DNAJB12     | DNAJB12     | 3541.055481 | 3992.28922  | 3111.602299 |             |
| 3078.092544 |             |             |             |             |             |
| ZDHHC13     | ZDHHC13     | 3359.492927 | 3593.161857 | 2009.8183   |             |
| 2503.955221 |             |             |             |             |             |
| AHCTF1      | AHCTF1      | 5247.743484 | 3787.139786 | 5758.026751 |             |
| 4781.649428 |             |             |             |             |             |
| NR1D2       | NR1D2       | 837.5304891 | 467.1719769 | 4209.814876 |             |
| 2931.022885 |             |             |             |             |             |
| VPS52       | VPS52       | 70.28227881 | 0           | 0           | 81.07686333 |
| GIMAP7      | GIMAP7      | 15210.25651 | 13553.06529 | 23283.89233 |             |
| 20058.03889 |             |             |             |             |             |
| NRN1        | NRN1        | 55.05445173 | 42.65483267 | 26.78567259 |             |
| 31.11088942 |             |             |             |             |             |
| ANO2        | ANO2        | 2.342742627 | 0           | 0           | 0.942754225 |
| CCDC36      | CCDC36      | 2.342742627 | 1.015591254 | 0           | 0           |
| NCR1        | NCR1        | 4.685485254 | 0           | 0.892855753 | 0           |
| TOR1AIP2    | TOR1AIP2    |             | 1882.393701 | 1103.947693 |             |
| 1270.533737 |             | 1268.004432 |             |             |             |
| DNAL1       | DNAL1       | 230.7601488 | 191.946747  | 158.0354683 |             |
| 181.9515654 |             |             |             |             |             |
| SCARNA23    | SCARNA23    |             | 12.88508445 | 4.062365016 | 0           |
| 1.885508449 |             |             |             |             |             |
| GUSBP2      | GUSBP2      | 36.31251072 | 18.28064257 | 58.03562395 |             |
| 28.28262674 |             |             |             |             |             |
| SLC35C2     | SLC35C2     | 3169.730774 | 3972.992986 | 3708.922798 |             |
| 2819.777886 |             |             |             |             |             |
| BCL7B       | BCL7B       | 5869.741652 | 7507.25055  | 5308.027452 |             |
| 4494.109389 |             |             |             |             |             |
| DNAJA1      | DNAJA1      | 21518.09103 | 29174.88996 | 34515.12484 |             |
| 26757.25041 |             |             |             |             |             |
| UHMK1       | UHMK1       | 10905.46693 | 7234.056503 | 5854.455173 |             |
| 8460.276413 |             |             |             |             |             |
| FZD6        | FZD6        | 1493.498425 | 1464.482588 | 527.67775   |             |
| 634.4735932 |             |             |             |             |             |
| SNORD116-20 | SNORD116-20 |             | 0           | 1.015591254 | 0.892855753 |
| 0           |             |             |             |             |             |
| SNORD116-18 | SNORD116-18 |             | 0           | 3.046773762 | 1.785711506 |
| 2.828262674 |             |             |             |             |             |
| SNORD116-17 | SNORD116-17 |             | 2.342742627 | 1.015591254 |             |
| 5.357134518 |             | 7.542033798 |             |             |             |
| SNORD116-24 | SNORD116-24 |             | 0           | 0           | 0.942754225 |
| SNORD116-25 | SNORD116-25 |             | 1.171371313 | 0           | 0.892855753 |
| 3.771016899 |             |             |             |             |             |

|             |             |             |             |             |
|-------------|-------------|-------------|-------------|-------------|
| SNORD116-26 | SNORD116-26 | 1.171371313 | 0           | 2.678567259 |
| 9.427542247 |             |             |             |             |
| SNORD116-27 | SNORD116-27 | 0           | 0           | 0.942754225 |
| SNORD116-11 | SNORD116-11 | 0           | 0           | 0.892855753 |
| POMK        | POMK        | 331.4980817 | 255.928996  | 117.8569594 |
| 161.2109724 |             |             |             |             |
| NR1H2       | NR1H2       | 4235.678669 | 6593.218421 | 8865.164772 |
| 6124.131444 |             |             |             |             |
| LTA4H       | LTA4H       | 3514.11394  | 4046.115556 | 3251.780653 |
| 4091.553335 |             |             |             |             |
| NCOA5       | NCOA5       | 4357.501286 | 4765.154164 | 4349.100373 |
| 3981.251091 |             |             |             |             |
| KIAA1524    | KIAA1524    | 1508.033367 | 3673.420439 | 3136.145793 |
| 1688.472816 |             |             |             |             |
| DIABLO      | DIABLO      | 3637.107928 | 4609.768702 | 5413.384431 |
| 4318.757103 |             |             |             |             |
| AATF        | AATF        | 6142.671168 | 8358.316021 | 6809.810828 |
| 6339.079407 |             |             |             |             |
| TOR3A       | TOR3A       | 5589.783908 | 7158.90275  | 4717.849799 |
| 5102.185864 |             |             |             |             |
| OCLM        | OCLM        | 12.88508445 | 10.15591254 | 3.571423012 |
| 14.14131337 |             |             |             |             |
| SLC6A20     | SLC6A20     | 3.51411394  | 12.18709505 | 34.82137437 |
| 15.0840676  |             |             |             |             |
| MST4        | MST4        | 4346.958944 | 3762.765596 | 4022.315167 |
| 4348.925239 |             |             |             |             |
| SDF4        | SDF4        | 7291.786426 | 9266.254602 | 7772.30933  |
| 7103.653083 |             |             |             |             |
| DNAJC27     | DNAJC27     | 161.6492413 | 77.18493531 | 541.9634421 |
| 262.0856745 |             |             |             |             |
| FAM21C      | FAM21C      | 2420.053134 | 1920.483061 | 3283.030604 |
| 3436.339149 |             |             |             |             |
| COX15       | COX15       | 3870.21082  | 4716.405784 | 3384.81616  |
| 3579.637791 |             |             |             |             |
| MED9        | MED9        | 1021.435785 | 1127.306292 | 1456.247733 |
| 1108.678968 |             |             |             |             |
| FAM57B      | FAM57B      | 5.856856567 | 3.046773762 | 3.571423012 |
| 2.828262674 |             |             |             |             |
| COPB2       | COPB2       | 13699.18751 | 15911.26818 | 11408.91081 |
| 12607.45225 |             |             |             |             |
| CCDC135     | CCDC135     | 2.342742627 | 0           | 0           |
| AP1S2       | AP1S2       | 1905.821127 | 2354.140527 | 2407.13911  |
| 2075.944803 |             |             |             |             |
| ACSS2       | ACSS2       | 985.1232746 | 1523.386881 | 1640.176018 |
| 1412.245829 |             |             |             |             |
| SF3B5       | SF3B5       | 5457.418949 | 7585.451077 | 5617.848398 |
| 4771.279131 |             |             |             |             |
| ENOX2       | ENOX2       | 1453.6718   | 1169.961125 | 1441.962041 |
| 1697.900359 |             |             |             |             |
| DDX58       | DDX58       | 2934.28514  | 3172.707078 | 7544.631113 |

|             |          |             |             |             |             |
|-------------|----------|-------------|-------------|-------------|-------------|
| 5898.813184 |          |             |             |             |             |
| SLC16A3     | SLC16A3  | 248.3307185 | 105.6214904 | 42.85707615 |             |
| 115.0160154 |          |             |             |             |             |
| ZNF596      | ZNF596   | 193.2762667 | 176.7128782 | 224.106794  |             |
| 219.6617344 |          |             |             |             |             |
| CEP170      | CEP170   | 1338.877411 | 1044.027809 | 1399.997821 |             |
| 1469.753836 |          |             |             |             |             |
| KCTD19      | KCTD19   | 2.342742627 | 8.124730032 | 19.64282657 |             |
| 15.0840676  |          |             |             |             |             |
| NRAS        | NRAS     | 10953.49315 | 8954.468087 | 4231.243414 |             |
| 6154.299579 |          |             |             |             |             |
| ZNF142      | ZNF142   | 1789.855367 | 1530.49602  | 1809.818611 |             |
| 1742.209807 |          |             |             |             |             |
| SLC52A1     | SLC52A1  | 19.91331233 | 45.70160643 | 91.96414256 |             |
| 49.96597391 |          |             |             |             |             |
| NRXN3       | NRXN3    | 0           | 2.678567259 | 1.885508449 |             |
| TSPAN14     | TSPAN14  | 14810.81889 | 12289.66977 | 10016.05584 |             |
| 10576.75965 |          |             |             |             |             |
| MEFV        | MEFV     | 8.199599194 | 0           | 28.5713841  | 5.656525348 |
| DNMT1       | DNMT1    | 12477.44723 | 12322.16869 | 7594.631035 |             |
| 10646.52346 |          |             |             |             |             |
| ACAD10      | ACAD10   | 1327.163698 | 1329.408952 | 1634.818884 |             |
| 1774.263451 |          |             |             |             |             |
| TMEM151B    | TMEM151B |             | 1.171371313 | 2.031182508 | 0           |
| 0           |          |             |             |             |             |
| ZNF727P     | ZNF727P  | 0           | 3.571423012 | 2.828262674 |             |
| TCF3        | TCF3     | 2882.744802 | 2801.000679 | 1598.211798 |             |
| 2037.29188  |          |             |             |             |             |
| CMPK1       | CMPK1    | 10964.03549 | 10316.37596 | 9025.878807 |             |
| 10593.72922 |          |             |             |             |             |
| CYP4F12     | CYP4F12  | 0           | 18.74997081 | 16.02682182 |             |
| C12orf10    | C12orf10 |             | 2080.355453 | 2660.849086 |             |
| 1808.925756 |          | 2016.551287 |             |             |             |
| LRRC61      | LRRC61   | 2368.512796 | 3901.901598 | 1633.926028 |             |
| 1383.963202 |          |             |             |             |             |
| MIS12       | MIS12    | 2300.57326  | 2211.957751 | 3729.45848  |             |
| 3442.938429 |          |             |             |             |             |
| LCE3A       | LCE3A    | 0           | 0           | 1.885508449 |             |
| CAPRIN2     | CAPRIN2  | 283.4718579 | 235.6171709 | 770.5345149 |             |
| 793.7990572 |          |             |             |             |             |
| MAN1A1      | MAN1A1   | 9178.865612 | 7663.651603 | 3579.458714 |             |
| 4587.442057 |          |             |             |             |             |
| ZYG11B      | ZYG11B   | 1071.804752 | 979.0299689 | 1458.9263   |             |
| 1511.235022 |          |             |             |             |             |
| THNSL2      | THNSL2   | 8.199599194 | 0           | 15.1785478  | 21.68334717 |
| SLC50A1     | SLC50A1  | 1745.343257 | 2034.229282 | 2696.424374 |             |
| 2413.450815 |          |             |             |             |             |
| POLD1       | POLD1    | 9397.912048 | 10513.40066 | 5358.92023  |             |
| 7026.347237 |          |             |             |             |             |
| HYKK        | HYKK     | 33.96976809 | 39.60805891 | 104.4641231 |             |

|             |             |             |             |             |
|-------------|-------------|-------------|-------------|-------------|
| 62.22177883 |             |             |             |             |
| MIR7152     | MIR7152     | 0           | 0           | 0           |
|             |             |             |             | 1.885508449 |
| MIR6511A2   | MIR6511A2   |             | 0           | 0           |
|             |             |             |             | 1.785711506 |
| 0.942754225 |             |             |             |             |
| FAM90A1     | FAM90A1     | 4.685485254 | 17.26505132 | 3.571423012 |
|             |             |             |             | 1.885508449 |
| ENPP1       | ENPP1       | 9.370970508 | 11.17150379 | 24.99996108 |
|             |             |             |             | 4.713771124 |
| ARHGEF11    | ARHGEF11    |             | 586.857028  | 695.680009  |
|             |             |             |             | 749.9988325 |
|             |             |             |             | 604.305458  |
| PYROXD1     | PYROXD1     | 6440.199481 | 5443.569122 | 3666.065722 |
|             |             |             |             | 6223.120637 |
| IMP3        | IMP3        | 5002.92688  | 7735.758582 | 7241.060157 |
|             |             |             |             | 6058.138648 |
| N4BP3       | N4BP3       | 132.3649584 | 213.2741634 | 202.6782559 |
|             |             |             |             | 167.810252  |
| LDHC        | LDHC        | 0           | 8.124730032 | 0           |
|             |             |             |             | 0           |
| CELSR2      | CELSR2      | 56.22582305 | 25.38978135 | 10.71426904 |
|             |             |             |             | 49.02321969 |
| BAIAP3      | BAIAP3      | 1017.921671 | 1655.413744 | 1153.569633 |
|             |             |             |             | 1255.748627 |
| ANKS1A      | ANKS1A      | 612.6271969 | 567.715511  | 659.8204015 |
|             |             |             |             | 663.6989742 |
| C12orf4     | C12orf4     | 2176.4079   | 1950.950799 | 1343.747908 |
|             |             |             |             | 1602.682182 |
| AVEN        | AVEN        | 842.2159744 | 1173.007898 | 651.7846997 |
|             |             |             |             | 639.1873644 |
| EPHA6       | EPHA6       | 0           | 0           | 2.678567259 |
|             |             |             |             | 0           |
| SLC9A9      | SLC9A9      | 2376.712395 | 1047.074583 | 701.7846219 |
|             |             |             |             | 949.3535043 |
| ENGASE      | ENGASE      | 809.4175776 | 559.590781  | 740.1774193 |
|             |             |             |             | 818.3106671 |
| COR07-PAM16 | COR07-PAM16 |             | 11151.4549  | 13099.09599 |
|             |             |             |             | 5838.383769 |
|             |             |             |             | 6167.498138 |
| CTSZ        | CTSZ        | 120.6512453 | 108.6682642 | 120.5355267 |
|             |             |             |             | 109.3594901 |
| GPR137      | GPR137      | 1878.879587 | 1742.754592 | 1525.890482 |
|             |             |             |             | 1606.453199 |
| RPH3AL      | RPH3AL      | 72.62502143 | 88.3564391  | 93.74985407 |
|             |             |             |             | 98.04643937 |
| SLC16A4     | SLC16A4     | 48.02622385 | 19.29623383 | 41.96422039 |
|             |             |             |             | 17.91233027 |
| ARHGEF33    | ARHGEF33    |             | 33.96976809 | 46.71719769 |
|             |             |             |             | 8.92855753  |
|             |             |             |             | 7.542033798 |
| PPP2R4      | PPP2R4      | 2191.635727 | 900.8294423 | 577.6776722 |
|             |             |             |             | 656.1569404 |
| B4GALNT1    | B4GALNT1    |             | 55.05445173 | 60.93547524 |
|             |             |             |             | 103.5712674 |
|             |             |             |             | 59.39351616 |
| HSDL2       | HSDL2       | 2398.96845  | 2073.837341 | 1699.104498 |
|             |             |             |             | 1970.35633  |



|               |              |             |             |             |             |
|---------------|--------------|-------------|-------------|-------------|-------------|
| SEPT5-GP1BB   | SEPT5-GP1BB  | 3.51411394  | 1.015591254 |             |             |
| 34.82137437   | 40.53843166  |             |             |             |             |
| AG02 AG02     | 2963.569423  | 2955.370549 | 2391.067707 |             |             |
| 1947.730228   |              |             |             |             |             |
| IFIT3 IFIT3   | 1805.083194  | 3685.580661 | 67660.60896 |             |             |
| 30516.95425   |              |             |             |             |             |
| SSBP4 SSBP4   | 4368.043628  | 4034.944052 | 1760.711545 |             |             |
| 2212.644165   |              |             |             |             |             |
| GSTM3 GSTM3   | 418.1795589  | 896.7670773 | 2797.317074 |             |             |
| 969.151343    |              |             |             |             |             |
| MORC4 MORC4   | 384.2097908  | 564.6687373 | 769.6416591 |             |             |
| 806.0548621   |              |             |             |             |             |
| RAPGEF4-AS1   | RAPGEF4-AS1  | 0           | 2.031182508 | 0           | 0           |
| MAML2 MAML2   | 345.5545375  | 256.9445873 | 1074.998327 |             |             |
| 1268.004432   |              |             |             |             |             |
| CARD11 CARD11 | 4896.33209   | 3417.46457  | 2859.816977 |             |             |
| 4399.833967   |              |             |             |             |             |
| LOC100130880  | LOC100130880 | 0           | 0           | 0           | 5.656525348 |
| EDN3 EDN3     | 3.51411394   | 12.18709505 | 0           | 10.37029647 |             |
| CARD16 CARD16 | 2156.494588  | 2564.367916 | 2364.282034 |             |             |
| 2127.796285   |              |             |             |             |             |
| NTPCR NTPCR   | 1171.371313  | 1175.039081 | 865.1772247 |             |             |
| 989.891936    |              |             |             |             |             |
| KLRC3 KLRC3   | 0            | 19.29623383 | 57.14276819 | 0           |             |
| ACAA2 ACAA2   | 10126.505    | 15188.1672  | 6518.739853 |             |             |
| 6642.646267   |              |             |             |             |             |
| TSNAX TSNAX   | 3168.559403  | 3119.896332 | 4266.957644 |             |             |
| 3768.188636   |              |             |             |             |             |
| XBP1 XBP1     | 8201.941937  | 9927.404508 | 17233.00889 |             |             |
| 13915.99511   |              |             |             |             |             |
| KCND3 KCND3   | 0            | 2.031182508 | 0           | 0           |             |
| KIF11 KIF11   | 13430.94348  | 10766.28288 | 3185.709327 |             |             |
| 5701.777551   |              |             |             |             |             |
| TMCC1-AS1     | TMCC1-AS1    | 35.1411394  | 44.68601518 |             |             |
| 8.92855753    | 41.48118589  |             |             |             |             |
| BBS9 BBS9     | 449.8065844  | 530.1386346 | 707.1417564 |             |             |
| 450.6365194   |              |             |             |             |             |
| ARL5A ARL5A   | 6182.497792  | 5669.03038  | 4137.49356  |             |             |
| 5014.509721   |              |             |             |             |             |
| KIAA1191      | KIAA1191     | 2855.803262 | 3109.74042  |             |             |
| 3625.887213   | 3423.14059   |             |             |             |             |
| CCDC24 CCDC24 | 25.7701689   | 23.35859884 | 47.32135491 |             |             |
| 32.99639787   |              |             |             |             |             |
| SEL1L SEL1L   | 8854.395758  | 6128.077627 | 6041.062025 |             |             |
| 6703.925292   |              |             |             |             |             |
| MIR141 MIR141 | 0            | 0           | 7.142846024 | 0           |             |
| RPS7P5 RPS7P5 | 1.171371313  | 0           | 0           | 0           |             |
| LOC440700     | LOC440700    | 2.342742627 | 2.031182508 |             |             |
| 15.1785478    | 14.14131337  |             |             |             |             |
| FLJ44511      | FLJ44511     | 0           | 0           | 12.49998054 | 0           |

|              |              |             |             |             |             |
|--------------|--------------|-------------|-------------|-------------|-------------|
| EGLN2        | EGLN2        | 7068.054505 | 7777.397824 | 8242.844312 |             |
| 6453.152668  |              |             |             |             |             |
| WDR78        | WDR78        | 35.1411394  | 62.96665775 | 91.07128681 |             |
| 70.70656685  |              |             |             |             |             |
| RNASE7       | RNASE7       | 0           | 0           | 11.60712479 | 0           |
| KIAA0319L    | KIAA0319L    |             |             | 3269.297336 | 3135.130201 |
| 2736.602883  |              | 3771.016899 |             |             |             |
| TNIP3        | TNIP3        | 1702.002518 | 875.439661  | 968.748492  |             |
| 1218.038458  |              |             |             |             |             |
| PREX2        | PREX2        | 0           | 0           | 3.571423012 | 0           |
| MRM1         | MRM1         | 720.3933578 | 1117.150379 | 855.3558114 |             |
| 835.2802431  |              |             |             |             |             |
| C6orf1       | C6orf1       | 1240.482221 | 1473.62291  | 2039.28254  |             |
| 1624.365529  |              |             |             |             |             |
| LPHN1        | LPHN1        | 73.79639275 | 53.82633646 | 110.7141134 |             |
| 83.905126    |              |             |             |             |             |
| EAF1         | EAF1         | 1664.518636 | 1760.019643 | 1450.890599 |             |
| 1263.290661  |              |             |             |             |             |
| LINC00673    | LINC00673    |             | 71.45365012 | 47.73278894 |             |
| 47.32135491  |              | 86.73338867 |             |             |             |
| SNORD109B    | SNORD109B    |             | 0           | 1.015591254 | 1.785711506 |
|              |              | 1.885508449 |             |             |             |
| TFAMP1       | TFAMP1       | 0           | 1.015591254 | 0           | 0           |
| MYBPC1       | MYBPC1       | 0           | 0           | 0.892855753 | 0           |
| APOLD1       | APOLD1       | 554.0586313 | 420.4547792 | 252.6781781 |             |
| 350.7045716  |              |             |             |             |             |
| ER01L        | ER01L        | 8328.450039 | 9213.443857 | 4646.421339 |             |
| 5711.205093  |              |             |             |             |             |
| ANXA10       | ANXA10       | 0           | 1.015591254 | 11.60712479 | 3.771016899 |
| HIP1R        | HIP1R        | 2268.946234 | 2253.596993 | 3666.958578 |             |
| 2644.4256    |              |             |             |             |             |
| SAA2-SAA4    | SAA2-SAA4    |             | 0           | 1.015591254 | 0           |
| SMC5         | SMC5         | 4044.745145 | 3554.569389 | 3484.816004 | 0           |
| 4168.859182  |              |             |             |             |             |
| PDK2         | PDK2         | 2238.49058  | 3175.753851 | 2965.173956 |             |
| 2239.041284  |              |             |             |             |             |
| TRIOBP       | TRIOBP       | 3641.793414 | 3952.681161 | 2337.496361 |             |
| 2393.652977  |              |             |             |             |             |
| SERPINB5     | SERPINB5     |             | 0           | 0           | 17.85711506 |
| PHKA1        | PHKA1        | 1043.69184  | 477.3278894 | 274.9995719 | 0           |
| 302.6241061  |              |             |             |             |             |
| SLC25A3      | SLC25A3      | 21070.62719 | 25138.93031 | 16016.93935 |             |
| 17300.48278  |              |             |             |             |             |
| APOBEC3B-AS1 | APOBEC3B-AS1 |             | 823.4740334 | 1109.025649 |             |
| 488.3920969  |              | 355.4183427 |             |             |             |
| LINC01030    | LINC01030    |             | 0           | 0           | 0           |
| FLJ38122     | FLJ38122     |             | 0           | 0           | 2.828262674 |
| 92.38991402  |              |             |             |             | 316.0709366 |
| AOC3         | AOC3         | 9.370970508 | 6.093547524 | 8.92855753  | 0           |
| TMSB4Y       | TMSB4Y       | 93.70970508 | 0           | 0           | 60.33627038 |

|             |         |             |               |               |
|-------------|---------|-------------|---------------|---------------|
| ITGA3       | ITGA3   | 201.4758659 | 114.7618117   | 396.4279543   |
| 404.4415624 |         |             |               |               |
| HDC         | HDC     | 87.85284851 | 19.29623383   | 0 49.02321969 |
| HTT         | HTT     | 2020.615516 | 1471.591727   | 911.6057238   |
| 1376.421168 |         |             |               |               |
| MED14       | MED14   | 2621.529    | 2340.937841   | 1888.389918   |
| 2041.062897 |         |             |               |               |
| STX3        | STX3    | 358.4396219 | 943.484275    | 1266.069458   |
| 795.6845657 |         |             |               |               |
| OASL        | OASL    | 3099.448495 | 3067.085587   | 7961.59475    |
| 5143.66705  |         |             |               |               |
| SLC7A14     | SLC7A14 | 0 0         | 1.785711506   | 0             |
| MYH15       | MYH15   | 7.028227881 | 2.031182508   | 0 13.19855915 |
| SLC37A3     | SLC37A3 | 2005.387689 | 2627.334574   | 3020.531013   |
| 3524.015292 |         |             |               |               |
| CNOT1       | CNOT1   | 24567.17056 | 12360.76115   | 11999.08847   |
| 13493.64122 |         |             |               |               |
| MBD4        | MBD4    | 2854.631891 | 2947.245819   | 3441.958928   |
| 3174.253475 |         |             |               |               |
| TSG101      | TSG101  | 7039.941594 | 6697.82432    | 5094.634927   |
| 5943.122633 |         |             |               |               |
| PTK6        | PTK6    | 36.31251072 | 12.18709505   | 40.17850889   |
| 50.90872813 |         |             |               |               |
| WISP1       | WISP1   | 0 0         | 14.28569205   | 7.542033798   |
| WISP3       | WISP3   | 0 0         | 0 0.942754225 |               |
| GGH         | GGH     | 3392.291324 | 4413.75959    | 1327.676505   |
| 1472.582099 |         |             |               |               |
| TPP2        | TPP2    | 10930.06573 | 8471.04665    | 5481.241468   |
| 7084.797999 |         |             |               |               |
| HTR3A       | HTR3A   | 0 0         | 0 1.885508449 |               |
| DSC1        | DSC1    | 4.685485254 | 0 0           | 16.96957604   |
| SMC6        | SMC6    | 3486.001029 | 3625.660777   | 1957.139811   |
| 2540.722636 |         |             |               |               |
| SMPD4       | SMPD4   | 11489.98121 | 14275.15067   | 9506.235203   |
| 9331.381316 |         |             |               |               |
| CHST15      | CHST15  | 37.48388203 | 45.70160643   | 5.357134518   |
| 131.0428372 |         |             |               |               |
| SEMA4B      | SEMA4B  | 898.4417974 | 849.0342884   | 976.7841938   |
| 977.636131  |         |             |               |               |
| ANXA2P2     | ANXA2P2 | 119.479874  | 154.3698706   | 27.67852834   |
| 44.30944856 |         |             |               |               |
| DLEU7       | DLEU7   | 9.370970508 | 2.031182508   | 10.71426904   |
| 11.3130507  |         |             |               |               |
| NAPEPLD     | NAPEPLD | 729.7643283 | 617.4794825   | 611.6061908   |
| 866.3911325 |         |             |               |               |
| PPP1R32     | PPP1R32 | 120.6512453 | 69.06020528   | 77.67845051   |
| 116.9015239 |         |             |               |               |
| ITM2B       | ITM2B   | 12901.48365 | 13641.42172   | 33945.48287   |
| 26716.71197 |         |             |               |               |
| SLC17A9     | SLC17A9 | 78.481878   | 103.5903079   | 142.8569205   |

|                 |             |   |             |             |
|-----------------|-------------|---|-------------|-------------|
| 68.8210584      |             |   |             |             |
| TMEM132A        | TMEM132A    |   | 7.028227881 | 7.109138778 |
| 14.28569205     | 2.828262674 |   |             |             |
| HOMER2 HOMER2   | 564.6009731 |   | 1034.887488 | 244.6424763 |
| 191.3791076     |             |   |             |             |
| SERPINE2        | SERPINE2    |   | 1187.770512 | 1721.427176 |
| 1052.676933     | 937.0976994 |   |             |             |
| SERPINB1        | SERPINB1    |   | 2689.468536 | 2142.897546 |
| 5098.20635      | 5937.466107 |   |             |             |
| NHLRC3 NHLRC3   | 1402.131462 |   | 979.0299689 | 1109.819701 |
| 1083.224604     |             |   |             |             |
| LINC00928       | LINC00928   | 0 | 1.015591254 | 0 0         |
| WDR86 WDR86     | 18.74194102 | 0 | 16.07140355 | 26.39711829 |
| SIPA1L1 SIPA1L1 | 3189.644087 |   | 2859.904971 | 2644.63874  |
| 3310.010083     |             |   |             |             |
| MORN4 MORN4     | 163.9919839 |   | 91.40321286 | 249.1067551 |
| 223.4327513     |             |   |             |             |
| ELF2 ELF2       | 1580.179902 |   | 1008.482115 | 2146.42523  |
| 2052.375947     |             |   |             |             |
| PER3 PER3       | 1554.409733 |   | 939.42191   | 922.3199929 |
| 1263.290661     |             |   |             |             |
| HMGCS1 HMGCS1   | 1322.478213 |   | 364.5972602 | 758.0345343 |
| 856.9635903     |             |   |             |             |
| TFR2 TFR2       | 151.1068994 |   | 262.0225435 | 313.3923693 |
| 145.1841506     |             |   |             |             |
| C17orf85        | C17orf85    |   | 2837.061321 | 2530.853405 |
| 2145.532375     | 2569.005262 |   |             |             |
| CHPF CHPF       | 1436.10123  |   | 1492.919143 | 1460.712012 |
| 1504.635743     |             |   |             |             |
| C5orf22 C5orf22 | 2954.198453 |   | 3105.678055 | 2769.638546 |
| 3506.102962     |             |   |             |             |
| TMA16 TMA16     | 1103.431777 |   | 1269.489068 | 858.9272344 |
| 1007.804266     |             |   |             |             |
| SECTM1 SECTM1   | 318.6129973 |   | 431.626283  | 504.4635005 |
| 456.2930448     |             |   |             |             |
| RALA RALA       | 3842.097908 |   | 3664.253245 | 3674.101424 |
| 3267.586143     |             |   |             |             |
| PTPN14 PTPN14   | 53.88308042 |   | 36.56128515 | 68.74989298 |
| 74.47758375     |             |   |             |             |
| CST6 CST6       | 15.22782708 |   | 12.18709505 | 25.89281684 |
| 77.30584643     |             |   |             |             |
| CNTNAP1 CNTNAP1 | 36.31251072 |   | 11.17150379 | 17.85711506 |
| 32.99639787     |             |   |             |             |
| NME4 NME4       | 235.445634  |   | 298.5838287 | 612.4990466 |
| 698.5808805     |             |   |             |             |
| TMEM9 TMEM9     | 873.8429998 |   | 1040.981035 | 1755.35441  |
| 1156.759434     |             |   |             |             |
| CIITA CIITA     | 1704.345261 |   | 1967.200259 | 526.7848943 |
| 546.7974503     |             |   |             |             |
| TMEM179 TMEM179 | 3.51411394  | 0 | 0           | 0           |

|             |             |             |             |             |
|-------------|-------------|-------------|-------------|-------------|
| FAM120B     | FAM120B     | 3081.877926 | 3833.856984 | 4541.06436  |
| 4193.370792 |             |             |             |             |
| MCFD2       | MCFD2       | 3632.422443 | 4052.209104 | 3545.530195 |
| 3947.311939 |             |             |             |             |
| NELL2       | NELL2       | 2031.157858 | 2384.608265 | 7793.737868 |
| 4215.996893 |             |             |             |             |
| SAA2        | SAA2        | 0           | 1.015591254 | 0           |
| EGR2        | EGR2        | 1803.911823 | 1382.219697 | 4426.778824 |
| 3677.684231 |             |             |             |             |
| PIGR        | PIGR        | 3.51411394  | 1.015591254 | 0           |
| SLC30A3     | SLC30A3     | 22.25605496 | 2.031182508 | 41.07136464 |
| 20.74059294 |             |             |             |             |
| ATAD2       | ATAD2       | 13108.81637 | 10911.51243 | 5237.491847 |
| 8639.399715 |             |             |             |             |
| TRPM7       | TRPM7       | 5074.38053  | 2870.060884 | 4626.778512 |
| 4875.92485  |             |             |             |             |
| CCDC22      | CCDC22      | 2424.738619 | 3469.259724 | 2141.068096 |
| 2433.248654 |             |             |             |             |
| C16orf58    | C16orf58    |             | 1616.492413 | 1772.206738 |
| 2547.317463 | 2526.581322 |             |             |             |
| GALNT8      | GALNT8      | 15.22782708 | 7.109138778 | 0           |
| SEC61A1     | SEC61A1     | 21507.54869 | 27306.20205 | 24.51160984 |
| 19701.67779 |             |             |             | 20108.89727 |
| TRIM54      | TRIM54      | 12.88508445 | 19.29623383 | 4.464278765 |
| 16.02682182 |             |             |             |             |
| UBC         | UBC         | 64010.7568  | 81254.40946 | 93950.74661 |
| 81453.96502 |             |             |             |             |
| MFSD11      | MFSD11      | 7563.544571 | 9827.876565 | 7453.559826 |
| 6473.893261 |             |             |             |             |
| NCR2        | NCR2        | 3.51411394  | 13.2026863  | 6.249990271 |
| 2.828262674 |             |             |             |             |
| PLEK        | PLEK        | 255.3589463 | 423.5015529 | 1065.176913 |
| 557.1677468 |             |             |             |             |
| SLC2A1      | SLC2A1      | 5638.981503 | 7138.590925 | 3518.744523 |
| 4216.939647 |             |             |             |             |
| OR2C1       | OR2C1       | 3.51411394  | 0           | 0           |
| OR2B6       | OR2B6       | 0           | 9.140321286 | 0           |
| SLC38A2     | SLC38A2     | 12818.31628 | 9107.822366 | 15233.012   |
| 13967.84659 |             |             |             |             |
| SORCS3      | SORCS3      | 0           | 0.892855753 | 5.656525348 |
| IL5         | IL5         | 4.685485254 | 224.4456671 | 135.7140745 |
| 10.37029647 |             |             |             |             |
| SLC7A4      | SLC7A4      | 0           | 14.28569205 | 0           |
| FCGRT       | FCGRT       | 330.3267104 | 250.8510398 | 928.5699832 |
| 629.7598221 |             |             |             |             |
| FOXH1       | FOXH1       | 38.65525334 | 7.109138778 | 14.28569205 |
| 41.48118589 |             |             |             |             |
| DDX39A      | DDX39A      | 18003.97709 | 28869.19699 | 21874.07309 |
| 16411.46554 |             |             |             |             |
| KLHDC2      | KLHDC2      | 3346.607843 | 3878.542999 | 5278.563212 |

|                 |             |             |             |             |
|-----------------|-------------|-------------|-------------|-------------|
| 4099.095369     |             |             |             |             |
| FEM1A FEM1A     | 4707.741309 | 5404.976654 | 6153.56185  |             |
| 4708.114598     |             |             |             |             |
| VASH1 VASH1     | 124.1653592 | 114.7618117 | 181.2497179 |             |
| 356.3610969     |             |             |             |             |
| EP400 EP400     | 569.2864583 | 243.741901  | 580.3562395 |             |
| 471.3771124     |             |             |             |             |
| KRT73 KRT73     | 2.342742627 | 0           | 17.85711506 | 29.22538097 |
| IFNL1 IFNL1     | 2.342742627 | 11.17150379 | 20.53568232 |             |
| 8.484788022     |             |             |             |             |
| MKRN1 MKRN1     | 7923.155564 | 7906.377913 | 16779.43817 |             |
| 15830.72894     |             |             |             |             |
| CCL28 CCL28     | 290.5000857 | 205.1494333 | 176.7854391 |             |
| 213.0624548     |             |             |             |             |
| SCYL3 SCYL3     | 1403.302834 | 1600.571816 | 2381.246293 |             |
| 1688.472816     |             |             |             |             |
| PHYKPL PHYKPL   | 2319.315201 | 2569.445873 | 2473.210436 |             |
| 2265.438402     |             |             |             |             |
| ZNF709 ZNF709   | 139.3931863 | 160.4634181 | 533.0348846 |             |
| 392.1857575     |             |             |             |             |
| MON1A MON1A     | 1064.776524 | 1606.665364 | 1297.319409 |             |
| 1230.294263     |             |             |             |             |
| TBRG4 TBRG4     | 6890.006066 | 9926.388917 | 8357.129848 |             |
| 7534.491764     |             |             |             |             |
| MCM3AP-AS1      | MCM3AP-AS1  | 1247.510449 | 910.9853549 |             |
| 1101.783999     | 1275.546466 |             |             |             |
| PL0D2 PL0D2     | 12.88508445 | 11.17150379 | 20.53568232 |             |
| 14.14131337     |             |             |             |             |
| ZBED6CL ZBED6CL | 1871.851359 | 1083.635868 | 781.2487839 |             |
| 879.5896917     |             |             |             |             |
| KLHDC7B KLHDC7B | 433.407386  | 298.5838287 | 684.8203626 |             |
| 810.7686333     |             |             |             |             |
| KANSL1L KANSL1L | 685.2522184 | 434.6730567 | 362.4994357 |             |
| 697.6381263     |             |             |             |             |
| TFCP2L1 TFCP2L1 | 21.08468364 | 1.015591254 | 12.49998054 |             |
| 3.771016899     |             |             |             |             |
| FAM19A2 FAM19A2 | 1.171371313 | 7.109138778 | 49.10706642 |             |
| 7.542033798     |             |             |             |             |
| LCN12 LCN12     | 1.171371313 | 1.015591254 | 0           | 1.885508449 |
| RNF180 RNF180   | 0           | 0           | 1.785711506 | 0           |
| MBLAC1 MBLAC1   | 147.5927855 | 193.9779295 | 231.24964   |             |
| 172.5240231     |             |             |             |             |
| MGAT2 MGAT2     | 5398.850384 | 5891.444865 | 5186.599069 |             |
| 4764.679852     |             |             |             |             |
| CUL7 CUL7       | 1634.062982 | 1095.822963 | 1500.890521 |             |
| 1602.682182     |             |             |             |             |
| CLCN7 CLCN7     | 3400.490923 | 3739.406997 | 5585.705591 |             |
| 3800.24228      |             |             |             |             |
| SEC31A SEC31A   | 9649.75688  | 12002.25744 | 13782.1214  |             |
| 12236.00708     |             |             |             |             |

|             |             |             |             |             |
|-------------|-------------|-------------|-------------|-------------|
| JUP         | JUP         | 156.963756  | 184.8376082 | 26.78567259 |
| 57.50800771 |             |             |             |             |
| PPCS        | PPCS        | 2446.994674 | 2937.089907 | 3718.744211 |
| 3296.811524 |             |             |             |             |
| IQCE        | IQCE        | 651.2824503 | 795.2079519 | 274.1067162 |
| 495.8887222 |             |             |             |             |
| SAP30L      | SAP30L      | 1283.82296  | 1239.02133  | 1297.319409 |
| 1277.431974 |             |             |             |             |
| STS         | STS         | 230.7601488 | 491.546167  | 173.2140161 |
| 286.5972843 |             |             |             |             |
| WASF1       | WASF1       | 85.51010588 | 20.31182508 | 166.9640258 |
| 91.4471598  |             |             |             |             |
| ATP50       | ATP50       | 12895.62679 | 15880.80044 | 8475.879664 |
| 8777.984586 |             |             |             |             |
| TTC1        | TTC1        | 4831.906668 | 5914.803464 | 4927.670901 |
| 4742.05375  |             |             |             |             |
| AGAP9       | AGAP9       | 14.05645576 | 5.07795627  | 33.92851862 |
| 37.71016899 |             |             |             |             |
| RAB9A       | RAB9A       | 726.2502143 | 954.6557788 | 1144.641075 |
| 1197.297865 |             |             |             |             |
| S0X6        | S0X6        | 1.171371313 | 1.015591254 | 4.464278765 |
| 3.771016899 |             |             |             |             |
| VTRNA1-1    | VTRNA1-1    |             | 5.856856567 | 7.109138778 |
| 11.60712479 | 16.02682182 |             |             |             |
| PLEKHG4B    | PLEKHG4B    |             | 2.342742627 | 7.109138778 |
| 2.678567259 | 0           |             |             |             |
| EFCAB11     | EFCAB11     | 306.8992841 | 413.3456404 | 295.5352543 |
| 241.3450815 |             |             |             |             |
| CCDC117     | CCDC117     | 4558.977152 | 3335.201678 | 3229.459259 |
| 3251.559321 |             |             |             |             |
| ASCC3       | ASCC3       | 5631.953275 | 4126.347265 | 4045.529417 |
| 4545.018117 |             |             |             |             |
| MRAP        | MRAP        | 108.9375322 | 109.6838554 | 107.1426904 |
| 79.19135488 |             |             |             |             |
| LIPH        | LIPH        | 0           | 5.07795627  | 0           |
| ZNF513      | ZNF513      | 685.2522184 | 566.6999198 | 544.6420093 |
| 636.3591017 |             |             |             |             |
| TBC1D20     | TBC1D20     | 2786.692355 | 2549.134048 | 3197.316452 |
| 2893.312716 |             |             |             |             |
| GNB3        | GNB3        | 104.2520469 | 59.91988399 | 35.71423012 |
| 62.22177883 |             |             |             |             |
| ANKS6       | ANKS6       | 189.7621528 | 160.4634181 | 585.713374  |
| 716.4932108 |             |             |             |             |
| OSCAR       | OSCAR       | 10.54234182 | 1.015591254 | 17.85711506 |
| 8.484788022 |             |             |             |             |
| KIRREL2     | KIRREL2     | 21.08468364 | 18.28064257 | 58.9284797  |
| 6.599279573 |             |             |             |             |
| CEMP1       | CEMP1       | 261.2158029 | 239.679536  | 554.4634226 |
| 430.8386807 |             |             |             |             |
| FGFBP3      | FGFBP3      | 80.82462063 | 43.67042392 | 165.1783143 |

|              |              |             |             |             |             |
|--------------|--------------|-------------|-------------|-------------|-------------|
| 105.5884732  |              |             |             |             |             |
| AMER1        | AMER1        | 4.685485254 | 10.15591254 | 12.49998054 |             |
| 3.771016899  |              |             |             |             |             |
| APOBEC3A     | APOBEC3A     | 0           | 1.015591254 | 0           | 0           |
| SKP2         | SKP2         | 2054.585284 | 2176.412057 | 1589.28324  |             |
| 1670.560486  |              |             |             |             |             |
| PLD2         | PLD2         | 557.5727452 | 398.1117716 | 566.9634032 |             |
| 657.0996946  |              |             |             |             |             |
| ZNF160       | ZNF160       | 1262.738276 | 1261.364338 | 3937.493871 |             |
| 3070.55051   |              |             |             |             |             |
| NXT1         | NXT1         | 2260.746635 | 3324.030175 | 3611.601521 |             |
| 2861.259072  |              |             |             |             |             |
| COTL1        | COTL1        | 65907.20695 | 60865.39945 | 22158.00122 |             |
| 36833.40756  |              |             |             |             |             |
| IL22RA1      | IL22RA1      | 5.856856567 | 0           | 11.60712479 | 0           |
| GPBP1L1      | GPBP1L1      | 6334.776063 | 4659.532674 | 7556.238238 |             |
| 7241.2952    |              |             |             |             |             |
| LGR6         | LGR6         | 0           | 4.062365016 | 23.21424958 | 14.14131337 |
| PTPN9        | PTPN9        | 3989.690694 | 5210.998725 | 1870.532803 |             |
| 3298.697032  |              |             |             |             |             |
| IRF7         | IRF7         | 5947.052158 | 6007.222268 | 8498.201057 |             |
| 6863.250756  |              |             |             |             |             |
| SEMA4F       | SEMA4F       | 504.8610361 | 609.3547524 | 1014.284135 |             |
| 984.2354106  |              |             |             |             |             |
| DSTYK        | DSTYK        | 1635.234354 | 1469.560545 | 2382.139149 |             |
| 2334.25946   |              |             |             |             |             |
| GGPS1        | GGPS1        | 1679.746464 | 1691.975029 | 3006.24532  |             |
| 2769.811912  |              |             |             |             |             |
| ZNF28        | ZNF28        | 1747.686    | 1626.977189 | 2341.067784 |             |
| 1923.218618  |              |             |             |             |             |
| C12orf29     | C12orf29     |             | 1287.337073 | 1387.297653 |             |
| 1528.569049  |              | 1693.186588 |             |             |             |
| AIDA         | AIDA         | 2110.811107 | 1020.66921  | 1240.176641 |             |
| 1126.591299  |              |             |             |             |             |
| LOC100862671 | LOC100862671 |             | 46.85485254 | 32.49892013 |             |
| 73.21417175  |              | 35.82466054 |             |             |             |
| TPSB2        | TPSB2        | 0           | 0           | 8.035701777 | 0           |
| TADA3        | TADA3        | 9170.666013 | 9921.310961 | 3882.136814 |             |
| 5225.686668  |              |             |             |             |             |
| ANAPC11      | ANAPC11      | 6913.433492 | 9387.109961 | 5161.599108 |             |
| 5061.647432  |              |             |             |             |             |
| SNORD116-9   | SNORD116-9   |             | 0           | 2.031182508 | 0           |
| 0.942754225  |              |             |             |             |             |
| UBE2K        | UBE2K        | 3392.291324 | 2852.795833 | 2018.746858 |             |
| 2529.409585  |              |             |             |             |             |
| ZDBF2        | ZDBF2        | 326.8125965 | 312.8021062 | 456.2492898 |             |
| 656.1569404  |              |             |             |             |             |
| PPP1R15A     | PPP1R15A     |             | 2295.887774 | 3981.117716 |             |
| 8834.807676  |              | 3670.142197 |             |             |             |
| MRPL23       | MRPL23       | 2889.77303  | 3915.104284 | 1815.175746 |             |



|             |             |             |             |             |
|-------------|-------------|-------------|-------------|-------------|
| 1829.88595  |             |             |             |             |
| PMAIP1      | PMAIP1      | 4069.343943 | 6465.253923 | 7226.774465 |
| 5720.632636 |             |             |             |             |
| SMIM20      | SMIM20      | 691.1090749 | 795.2079519 | 1211.605257 |
| 732.5200326 |             |             |             |             |
| DFFA        | DFFA        | 3286.867906 | 4251.264989 | 2990.173917 |
| 3274.185422 |             |             |             |             |
| CTNNA2      | CTNNA2      | 0           | 0           | 0.892855753 |
| 0           |             |             |             | 0           |
| PPP3R1      | PPP3R1      | 769.5909529 | 313.8176975 | 266.0710144 |
| 386.5292321 |             |             |             |             |
| RNF8        | RNF8        | 1409.15969  | 1926.576609 | 1189.283863 |
| 1670.560486 |             |             |             |             |
| KIF22       | KIF22       | 12798.40297 | 16659.75893 | 9474.092395 |
| 9651.917753 |             |             |             |             |
| OST4        | OST4        | 9810.23475  | 11003.93124 | 8612.486594 |
| 8109.571841 |             |             |             |             |
| NCOA4       | NCOA4       | 17897.3823  | 20953.67875 | 18430.32845 |
| 18184.78624 |             |             |             |             |
| HMGB3       | HMGB3       | 3323.180416 | 3406.293066 | 744.641698  |
| 1075.68257  |             |             |             |             |
| UQCC1       | UQCC1       | 2715.238705 | 3822.68548  | 2832.138449 |
| 2515.268272 |             |             |             |             |
| CCDC101     | CCDC101     | 1096.403549 | 1239.02133  | 1565.176135 |
| 1378.306677 |             |             |             |             |
| PPM1K       | PPM1K       | 2561.789063 | 2582.648559 | 4984.813669 |
| 4176.401215 |             |             |             |             |
| IGSF11      | IGSF11      | 0           | 4.062365016 | 27.67852834 |
| 1.885508449 |             |             |             |             |
| DUSP18      | DUSP18      | 1080.004351 | 962.7805088 | 733.0345732 |
| 881.4752001 |             |             |             |             |
| APBB1       | APBB1       | 2008.901803 | 2130.710451 | 5487.491458 |
| 4058.556937 |             |             |             |             |
| APAF1       | APAF1       | 2615.672143 | 1625.961598 | 970.5342035 |
| 1401.875532 |             |             |             |             |
| PPP1R12B    | PPP1R12B    |             | 614.9699396 | 462.0940206 |
| 573.2133934 | 513.8010525 |             |             |             |
| GCLC        | GCLC        | 1803.911823 | 2144.928729 | 3018.745301 |
| 1498.036463 |             |             |             |             |
| FJX1        | FJX1        | 5.856856567 | 2.031182508 | 17.85711506 |
| 27.33987252 |             |             |             |             |
| FKBP3       | FKBP3       | 5547.614541 | 5543.097065 | 3054.459531 |
| 3896.403211 |             |             |             |             |
| CHML        | CHML        | 949.9821352 | 547.4036859 | 830.3558503 |
| 565.6525348 |             |             |             |             |
| NT5E        | NT5E        | 145.2500429 | 313.8176975 | 623.2133156 |
| 433.6669434 |             |             |             |             |
| LIMK2       | LIMK2       | 5354.338274 | 4881.947158 | 3052.67382  |
| 4019.904014 |             |             |             |             |
| UCP2        | UCP2        | 29027.75252 | 38877.8488  | 18091.93612 |
| 23290.74312 |             |             |             |             |
| SERINC5     | SERINC5     | 2340.399884 | 971.9208301 | 2134.818105 |

|             |            |             |             |             |             |
|-------------|------------|-------------|-------------|-------------|-------------|
| 1629.0793   |            |             |             |             |             |
| PTPN13      | PTPN13     | 1602.435957 | 210.2273896 | 224.106794  |             |
| 1063.426765 |            |             |             |             |             |
| NSUN4       | NSUN4      | 1324.820956 | 1526.433655 | 1748.211564 |             |
| 1743.152562 |            |             |             |             |             |
| ELOVL3      | ELOVL3     | 7.028227881 | 8.124730032 | 41.96422039 |             |
| 18.85508449 |            |             |             |             |             |
| LPAR6       | LPAR6      | 865.6434006 | 1029.809532 | 1163.391046 |             |
| 1331.168965 |            |             |             |             |             |
| TNK2        | TNK2       | 388.8952761 | 205.1494333 | 225.8925055 |             |
| 265.8566914 |            |             |             |             |             |
| WFS1        | WFS1       | 292.8428284 | 561.6219635 | 393.7493871 |             |
| 560.9387637 |            |             |             |             |             |
| SNORA70     | SNORA70    | 173.3629544 | 218.3521196 | 327.6780614 |             |
| 326.1929618 |            |             |             |             |             |
| TET2        | TET2       | 2818.31938  | 2489.214164 | 2009.8183   |             |
| 2113.654972 |            |             |             |             |             |
| SOWAHC      | SOWAHC     | 32.79839678 | 3.046773762 | 46.42849916 |             |
| 124.4435577 |            |             |             |             |             |
| PIK3C2G     | PIK3C2G    | 0           | 0           | 1.885508449 |             |
| AGAP11      | AGAP11     | 0           | 3.046773762 | 0           | 0.942754225 |
| FAM228A     | FAM228A    | 1.171371313 | 0           | 11.60712479 | 1.885508449 |
| BAG5        | BAG5       | 3381.748982 | 3298.640393 | 4620.528522 |             |
| 4200.912825 |            |             |             |             |             |
| DOK1        | DOK1       | 3601.966789 | 5354.197091 | 2362.496323 |             |
| 2082.544082 |            |             |             |             |             |
| ASPDH       | ASPDH      | 0           | 0           | 1.785711506 | 0           |
| XRCC1       | XRCC1      | 2940.141997 | 2176.412057 | 1956.246955 |             |
| 3021.52729  |            |             |             |             |             |
| KCP         | KCP        | 5.856856567 | 0           | 20.53568232 | 5.656525348 |
| CXorf22     | CXorf22    | 0           | 0           | 0.942754225 |             |
| GABPB1-AS1  | GABPB1-AS1 | 1349.105043 | 1470.070998 | 1290.816484 |             |
| 1308.542864 |            |             |             |             |             |
| LRRC59      | LRRC59     | 7748.621239 | 5744.184133 | 3131.245126 |             |
| 3298.697032 |            |             |             |             |             |
| PAN3        | PAN3       | 968.7240762 | 375.768764  | 616.9633253 |             |
| 870.1621494 |            |             |             |             |             |
| TAF9        | TAF9       | 6412.08657  | 7943.954789 | 6090.169091 |             |
| 6170.326401 |            |             |             |             |             |
| AK6         | AK6        | 4161.882277 | 4900.227801 | 4209.814876 |             |
| 4187.714266 |            |             |             |             |             |
| ZNF585A     | ZNF585A    | 483.7763525 | 478.3434807 | 1629.461749 |             |
| 1189.755832 |            |             |             |             |             |
| ARSE        | ARSE       | 0           | 1.015591254 | 0           | 0           |
| ATP5J       | ATP5J      | 9520.906036 | 10070.60288 | 6497.311315 |             |
| 6857.594231 |            |             |             |             |             |
| KIF2A       | KIF2A      | 8306.193984 | 9130.165374 | 8550.879547 |             |
| 9604.780041 |            |             |             |             |             |
| PPP1R14A    | PPP1R14A   |             | 0           | 2.031182508 | 0.892855753 |
| 0.942754225 |            |             |             |             |             |

|                 |               |               |             |
|-----------------|---------------|---------------|-------------|
| FXYD6-FXYD2     | FXYD6-FXYD2   | 9.370970508   | 18.28064257 |
| 20.53568232     | 86.73338867   |               |             |
| ETV7 ETV7       | 260.0444316   | 761.6934405   | 1568.747558 |
| 499.6597391     |               |               |             |
| SLC25A26        | SLC25A26      | 1040.177726   | 1512.215377 |
| 2196.425152     | 1781.805485   |               |             |
| RAB40AL RAB40AL | 2.342742627   | 0 0           | 0           |
| GPER1 GPER1     | 25.7701689    | 5.07795627    | 0 0         |
| SYNE4 SYNE4     | 18.74194102   | 23.35859884   | 47.32135491 |
| 38.65292321     |               |               |             |
| ARL2 ARL2       | 1625.863383   | 2132.741634   | 2458.031888 |
| 2430.420391     |               |               |             |
| TDGF1 TDGF1     | 0 2.031182508 | 0             | 2.828262674 |
| LUC7L2 LUC7L2   | 9831.319434   | 9886.780858   | 9135.700065 |
| 9002.360092     |               |               |             |
| HRC HRC         | 0 0           | 0 4.713771124 |             |
| HOXB2 HOXB2     | 828.1595186   | 724.1165641   | 931.2485504 |
| 1115.278248     |               |               |             |
| CDC25A CDC25A   | 2607.472544   | 2008.839501   | 1012.498424 |
| 1148.274646     |               |               |             |
| BRI3 BRI3       | 227.2460348   | 113.7462205   | 346.4280322 |
| 206.4631752     |               |               |             |
| SETD1A SETD1A   | 320.9557399   | 237.6483534   | 315.1780808 |
| 249.8298695     |               |               |             |
| DCTD DCTD       | 3760.101916   | 4069.474155   | 3506.244542 |
| 4740.168242     |               |               |             |
| ARHGAP11B       | ARHGAP11B     | 691.1090749   | 658.1031326 |
| 261.6067356     | 411.040842    |               |             |
| TPM2 TPM2       | 23.42742627   | 8.124730032   | 19.64282657 |
| 13.19855915     |               |               |             |
| ACOT8 ACOT8     | 2183.436128   | 2610.069523   | 1524.997626 |
| 1459.38354      |               |               |             |
| MED6 MED6       | 2942.484739   | 3719.095172   | 3108.030876 |
| 3003.61496      |               |               |             |
| HTATIP2 HTATIP2 | 3895.980989   | 5300.370755   | 5365.17022  |
| 4817.474088     |               |               |             |
| SHISA9 SHISA9   | 4.685485254   | 18.28064257   | 74.99988325 |
| 58.45076193     |               |               |             |
| 7-Sep 7-Sep     | 17931.35207   | 17755.58189   | 16749.97393 |
| 20207.93681     |               |               |             |
| SPATA45 SPATA45 | 2.342742627   | 14.21827756   | 19.64282657 |
| 5.656525348     |               |               |             |
| CYB5RL CYB5RL   | 744.9921554   | 752.5531193   | 506.249212  |
| 737.2338037     |               |               |             |
| RFX5 RFX5       | 8034.435839   | 8782.833165   | 5393.741604 |
| 6679.413682     |               |               |             |
| KIAA0825        | KIAA0825      | 128.8508445   | 134.0580455 |
| 71.42846024     | 46.19495701   |               |             |
| C2CD4D C2CD4D   | 162.8206126   | 259.991361    | 283.0352737 |
| 318.650928      |               |               |             |

|              |              |             |             |             |             |
|--------------|--------------|-------------|-------------|-------------|-------------|
| MEF2A        | MEF2A        | 1735.972287 | 1830.09544  | 2299.99642  |             |
| 1589.483623  |              |             |             |             |             |
| LIMS2        | LIMS2        | 543.5162894 | 944.4998663 | 276.7852834 |             |
| 428.9531722  |              |             |             |             |             |
| SLC1A5       | SLC1A5       | 11664.51554 | 15746.74239 | 9180.342853 |             |
| 9250.304453  |              |             |             |             |             |
| PDHX         | PDHX         | 2680.097565 | 3180.831808 | 2115.175279 |             |
| 2129.681794  |              |             |             |             |             |
| LOC102723859 | LOC102723859 |             | 69.11090749 | 30.46773762 |             |
| 64.28561422  | 82.01961755  |             |             |             |             |
| ATP6V1E1     | ATP6V1E1     |             | 5254.771712 | 7001.486105 |             |
| 6683.918167  | 5840.362422  |             |             |             |             |
| ATP6V1B1     | ATP6V1B1     |             | 1.171371313 | 0           | 5.357134518 |
|              | 1.885508449  |             |             |             |             |
| FKBP14       | FKBP14       | 147.5927855 | 118.8241767 | 178.5711506 |             |
| 221.5472428  |              |             |             |             |             |
| LAX1         | LAX1         | 2886.258916 | 3040.680215 | 2562.496011 |             |
| 2801.865556  |              |             |             |             |             |
| C17orf80     | C17orf80     |             | 2049.899799 | 2401.873316 |             |
| 1862.497101  | 1677.159766  |             |             |             |             |
| PSTPIP2      | PSTPIP2      | 491.9759517 | 1489.87237  | 1764.282968 |             |
| 1539.517649  |              |             |             |             |             |
| TRNAU1AP     | TRNAU1AP     |             | 2223.262753 | 2628.350165 |             |
| 1772.31867   | 1893.993237  |             |             |             |             |
| SPATS2L      | SPATS2L      | 3374.720754 | 2742.096386 | 2496.424685 |             |
| 3330.750676  |              |             |             |             |             |
| RAB20        | RAB20        | 19.91331233 | 70.07579653 | 349.1065994 |             |
| 178.1805485  |              |             |             |             |             |
| RBM15        | RBM15        | 1984.303005 | 1881.890594 | 2103.568154 |             |
| 1840.256247  |              |             |             |             |             |
| LOC101928471 | LOC101928471 |             | 0           | 0           | 3.571423012 |
| LOC101927583 | LOC101927583 |             | 0           | 0           | 1.885508449 |
| EIF4G2       | EIF4G2       | 99974.19886 | 92380.21165 | 69597.21309 |             |
| 72607.15937  |              |             |             |             |             |
| CCBL1        | CCBL1        | 826.9881473 | 822.6289158 | 412.4993579 |             |
| 554.3394841  |              |             |             |             |             |
| LOC101929718 | LOC101929718 |             | 1335.363297 | 1332.455725 |             |
| 1466.962002  | 1282.145746  |             |             |             |             |
| SP110        | SP110        | 4323.531518 | 4601.643972 | 8004.451826 |             |
| 6904.731942  |              |             |             |             |             |
| SNORA34      | SNORA34      | 9.370970508 | 18.28064257 | 10.71426904 |             |
| 12.25580492  |              |             |             |             |             |
| SNORA31      | SNORA31      | 63.25405093 | 56.87311023 | 122.3212382 |             |
| 74.47758375  |              |             |             |             |             |
| SNORA29      | SNORA29      | 35.1411394  | 8.124730032 | 45.5356434  |             |
| 39.59567744  |              |             |             |             |             |
| SNORA69      | SNORA69      | 3.51411394  | 0           | 1.785711506 | 0           |
| ZNF639       | ZNF639       | 1466.556884 | 1321.284222 | 2133.92525  |             |
| 1787.46201   |              |             |             |             |             |
| ATL1         | ATL1         | 171.0202118 | 66.01343151 | 23.21424958 |             |

|             |          |             |             |             |
|-------------|----------|-------------|-------------|-------------|
| 178.1805485 |          |             |             |             |
| KCTD21      | KCTD21   | 434.5787573 | 811.457412  | 531.2491731 |
| 529.8278743 |          |             |             |             |
| ECD         | ECD      | 3610.166388 | 3906.979554 | 4061.600821 |
| 3571.153003 |          |             |             |             |
| ITIH4       | ITIH4    | 86.6814772  | 62.96665775 | 114.2855364 |
| 158.3827098 |          |             |             |             |
| BUD13       | BUD13    | 2405.996678 | 2547.102865 | 2343.746352 |
| 2618.971236 |          |             |             |             |
| HPCA        | HPCA     | 3.51411394  | 0           | 0.892855753 |
|             |          |             |             | 4.713771124 |
| HOXA4       | HOXA4    | 0           | 0           | 5.357134518 |
|             |          |             |             | 9.427542247 |
| VDAC2       | VDAC2    | 8826.282847 | 12183.03268 | 8080.344565 |
| 8059.605867 |          |             |             |             |
| ASCL4       | ASCL4    | 0           | 9.140321286 | 0           |
| BACE2       | BACE2    | 19.91331233 | 23.35859884 | 5.357134518 |
| 19.79783872 |          |             |             |             |
| LRRC14      | LRRC14   | 2944.827482 | 3440.823169 | 3685.708549 |
| 3283.612965 |          |             |             |             |
| LRWD1       | LRWD1    | 2564.131805 | 3357.544686 | 2022.318281 |
| 1933.588915 |          |             |             |             |
| CEP41       | CEP41    | 1774.62754  | 1457.37345  | 1393.74783  |
| 1066.255028 |          |             |             |             |
| TGM5        | TGM5     | 0           | 9.140321286 | 38.39279738 |
|             |          |             |             | 11.3130507  |
| HSPB11      | HSPB11   | 3249.384024 | 3288.484481 | 2315.174968 |
| 2479.443611 |          |             |             |             |
| PLAC8L1     | PLAC8L1  | 2.342742627 | 4.062365016 | 2.678567259 |
| 8.484788022 |          |             |             |             |
| PTPN4       | PTPN4    | 3102.962609 | 3116.849559 | 2798.20993  |
| 2586.917593 |          |             |             |             |
| GCC1        | GCC1     | 2532.50478  | 2500.385667 | 4220.529145 |
| 3961.453252 |          |             |             |             |
| C1orf123    | C1orf123 |             | 1953.847351 | 2234.300759 |
| 2074.103914 |          | 2121.197006 |             |             |
| ULK4        | ULK4     | 340.8690522 | 575.840241  | 601.7847775 |
| 352.59008   |          |             |             |             |
| MICB        | MICB     | 172.1915831 | 155.3854619 | 74.99988325 |
| 94.27542247 |          |             |             |             |
| RPS4Y2      | RPS4Y2   | 32.79839678 | 0           | 0           |
|             |          |             |             | 14.14131337 |
| FBF1        | FBF1     | 701.6514168 | 457.0160643 | 744.641698  |
| 644.8438897 |          |             |             |             |
| CATSPER1    | CATSPER1 |             | 3.51411394  | 4.062365016 |
| 15.1785478  |          | 28.28262674 |             |             |
| PCGF1       | PCGF1    | 761.3913537 | 965.8272826 | 969.6413478 |
| 875.8186748 |          |             |             |             |
| KNTC1       | KNTC1    | 5429.306038 | 2635.459304 | 1341.962197 |
| 1982.612135 |          |             |             |             |
| WDR48       | WDR48    | 5564.013739 | 6211.35611  | 6033.919179 |
| 6887.762366 |          |             |             |             |
| CBX2        | CBX2     | 312.7561407 | 258.9757698 | 64.28561422 |
| 181.9515654 |          |             |             |             |

|                 |             |             |             |
|-----------------|-------------|-------------|-------------|
| LINC00176       | LINC00176   | 78.481878   | 166.5569657 |
| 58.9284797      | 56.56525348 |             |             |
| CNNM4 CNNM4     | 1399.78872  | 910.9853549 | 744.641698  |
| 1152.045663     |             |             |             |
| TAC1 TAC1       | 3.51411394  | 1.015591254 | 76.78559476 |
| 57.50800771     |             |             |             |
| MYCBP MYCBP     | 5371.908844 | 5972.692165 | 3210.709288 |
| 4442.257907     |             |             |             |
| PCYOX1 PCYOX1   | 1213.540681 | 1638.148693 | 2755.352854 |
| 2872.572123     |             |             |             |
| MMD MMD         | 1133.887431 | 1396.437974 | 992.8555974 |
| 657.0996946     |             |             |             |
| PIGN PIGN       | 2880.40206  | 2543.0405   | 2158.032355 |
| 2153.250649     |             |             |             |
| B4GALT3 B4GALT3 | 4787.394558 | 5749.262089 | 6207.133195 |
| 5095.586585     |             |             |             |
| AK3 AK3         | 3409.861893 | 3151.379661 | 2252.675065 |
| 2851.83153      |             |             |             |
| RPL21 RPL21     | 23163.86772 | 24781.44219 | 41508.86396 |
| 36569.43638     |             |             |             |
| ARHGEF39        | ARHGEF39    | 2601.615687 | 2896.466257 |
| 1882.139927     | 2386.110943 |             |             |
| BTBD7 BTBD7     | 756.7058685 | 517.9515396 | 712.4988909 |
| 987.0636733     |             |             |             |
| AMBRA1 AMBRA1   | 2195.149841 | 1977.356172 | 1891.961341 |
| 1987.325906     |             |             |             |
| TRIM61 TRIM61   | 112.4516461 | 80.23170907 | 54.46420093 |
| 129.1573288     |             |             |             |
| FOXK1 FOXK1     | 928.8974516 | 635.760125  | 1325.890793 |
| 1268.947186     |             |             |             |
| ZNF611 ZNF611   | 1754.714228 | 1450.264311 | 2040.175396 |
| 2341.801494     |             |             |             |
| SPDYE4 SPDYE4   | 1.171371313 | 1.015591254 | 0 0         |
| FAM229B FAM229B | 134.707701  | 197.0247033 | 345.5351764 |
| 211.1769463     |             |             |             |
| RCHY1 RCHY1     | 1512.240366 | 1564.010531 | 1491.961963 |
| 1665.846715     |             |             |             |
| EIF1AX EIF1AX   | 2605.129801 | 4821.011683 | 5392.848748 |
| 3612.634189     |             |             |             |
| PLS1 PLS1       | 439.2642425 | 504.7488533 | 440.1778862 |
| 447.8082567     |             |             |             |
| EXT1 EXT1       | 946.4680213 | 1150.664891 | 610.7133351 |
| 999.3194782     |             |             |             |
| MXRA8 MXRA8     | 15.22782708 | 10.15591254 | 8.035701777 |
| 7.542033798     |             |             |             |
| RIBC1 RIBC1     | 38.65525334 | 52.81074521 | 95.53556557 |
| 45.25220279     |             |             |             |
| UNC45B UNC45B   | 50.36896648 | 15.23386881 | 3.571423012 |
| 5.656525348     |             |             |             |
| PRIMA1 PRIMA1   | 1.171371313 | 0 0         | 0           |

|                 |              |             |   |             |             |
|-----------------|--------------|-------------|---|-------------|-------------|
| LOC101927697    | LOC101927697 | 0           | 0 | 0           | 0.942754225 |
| SLC9A6 SLC9A6   | 1974.932034  | 1440.108398 |   | 1816.961457 |             |
| 1497.093709     |              |             |   |             |             |
| C19orf54        | C19orf54     | 917.1837384 |   | 1019.653619 |             |
| 597.3204988     | 528.8851201  |             |   |             |             |
| ARHGAP12        | ARHGAP12     | 706.336902  |   | 559.590781  |             |
| 1416.96208      | 1199.183374  |             |   |             |             |
| GPR157 GPR157   | 62.08267961  | 158.4322356 |   | 69.64274874 |             |
| 82.01961755     |              |             |   |             |             |
| TYW1 TYW1       | 1611.806927  | 1918.451879 |   | 2049.103953 |             |
| 1877.023661     |              |             |   |             |             |
| TOE1 TOE1       | 2222.091382  | 2978.729148 |   | 2995.531051 |             |
| 2764.155387     |              |             |   |             |             |
| HSD11B1 HSD11B1 | 89.02421982  | 139.1360018 |   | 106.2498346 |             |
| 49.96597391     |              |             |   |             |             |
| AKT3 AKT3       | 256.5303176  | 847.0031059 |   | 519.6420483 |             |
| 366.7313934     |              |             |   |             |             |
| LOC101928861    | LOC101928861 | 17.5705697  |   | 4.062365016 |             |
| 12.49998054     | 12.25580492  |             |   |             |             |
| FAIM FAIM       | 400.6089892  | 435.688648  |   | 336.6066189 |             |
| 430.8386807     |              |             |   |             |             |
| URGCP URGCP     | 2457.537016  | 2857.873789 |   | 3319.63769  |             |
| 3311.895591     |              |             |   |             |             |
| PPT1 PPT1       | 14657.36925  | 19543.0225  |   | 16005.33223 |             |
| 15515.84903     |              |             |   |             |             |
| SUFU SUFU       | 1506.383509  | 950.5934138 |   | 661.606113  |             |
| 890.9027424     |              |             |   |             |             |
| NUP210 NUP210   | 26152.03594  | 15003.3296  |   | 11701.7675  |             |
| 14880.43268     |              |             |   |             |             |
| LSR LSR         | 364.2964785  | 741.3816155 |   | 4066.065099 |             |
| 3387.315929     |              |             |   |             |             |
| TCF7L1 TCF7L1   | 3.51411394   | 1.015591254 |   | 25.89281684 |             |
| 5.656525348     |              |             |   |             |             |
| PSME1 PSME1     | 26129.77989  | 33045.30822 |   | 40366.00859 |             |
| 35682.30465     |              |             |   |             |             |
| FAM213A FAM213A | 310.4133981  | 317.8800625 |   | 790.1773414 |             |
| 726.8635073     |              |             |   |             |             |
| SLC22A1 SLC22A1 | 3.51411394   | 10.15591254 |   | 15.1785478  | 0           |
| ANKRD7 ANKRD7   | 0            | 3.571423012 |   | 1.885508449 |             |
| GTPBP8 GTPBP8   | 1049.548697  | 860.2057922 |   | 881.2486282 |             |
| 991.7774444     |              |             |   |             |             |
| TLR10 TLR10     | 4.685485254  | 0           | 0 | 14.14131337 |             |
| STAT1 STAT1     | 93386.40659  | 118616.9961 |   | 197674.6923 |             |
| 166115.1799     |              |             |   |             |             |
| TTC39B TTC39B   | 886.7280843  | 1017.622437 |   | 1641.068874 |             |
| 1174.671764     |              |             |   |             |             |
| ACTA2 ACTA2     | 1061.26241   | 1209.569184 |   | 1830.354294 |             |
| 1330.226211     |              |             |   |             |             |
| ACP2 ACP2       | 2265.43212   | 2395.779768 |   | 1367.855014 |             |
| 1740.324299     |              |             |   |             |             |

|             |             |             |             |             |             |
|-------------|-------------|-------------|-------------|-------------|-------------|
| ACADSB      | ACADSB      | 2001.873575 | 2186.56797  | 2002.675454 |             |
| 2592.574118 |             |             |             |             |             |
| ACAA1       | ACAA1       | 5689.350469 | 7647.402143 | 4732.135491 |             |
| 4848.584978 |             |             |             |             |             |
| CBFB        | CBFB        | 17087.96472 | 21122.2669  | 11565.16057 |             |
| 12152.10196 |             |             |             |             |             |
| KIF5C       | KIF5C       | 335.0121956 | 145.2295493 | 404.4636561 |             |
| 421.4111384 |             |             |             |             |             |
| OCRL        | OCRL        | 62.08267961 | 86.32525659 | 74.99988325 |             |
| 70.70656685 |             |             |             |             |             |
| CHAD        | CHAD        | 5.856856567 | 6.093547524 | 13.3928363  |             |
| 6.599279573 |             |             |             |             |             |
| THBS3       | THBS3       | 182.7339249 | 239.679536  | 43.7499319  |             |
| 252.6581322 |             |             |             |             |             |
| LRAT        | LRAT        | 4.685485254 | 0           | 0           | 0           |
| HAND1       | HAND1       | 0           | 1.015591254 | 0           | 0           |
| CYP7B1      | CYP7B1      | 22.25605496 | 11.17150379 | 6.249990271 |             |
| 2.828262674 |             |             |             |             |             |
| MTA2        | MTA2        | 4157.196791 | 3887.683321 | 2624.995914 |             |
| 2838.632971 |             |             |             |             |             |
| LINC00847   | LINC00847   |             | 987.4660172 | 961.7649176 |             |
| 1874.104226 | 1632.850317 |             |             |             |             |
| FAM27E2     | FAM27E2     | 0           | 1.015591254 | 0           | 0           |
| CISD3       | CISD3       | 2022.958258 | 3293.562437 | 1274.998015 |             |
| 1416.9596   |             |             |             |             |             |
| ARL5C       | ARL5C       | 3.51411394  | 0           | 8.92855753  | 0           |
| NAF1        | NAF1        | 249.5020898 | 174.6816957 | 179.4640064 |             |
| 148.0124133 |             |             |             |             |             |
| MTSS1L      | MTSS1L      | 4.685485254 | 2.031182508 | 9.821413283 |             |
| 16.96957604 |             |             |             |             |             |
| MYOM3       | MYOM3       | 2.342742627 | 4.062365016 | 0           | 0           |
| TXNDC5      | TXNDC5      | 7917.298708 | 9671.475512 | 5520.527121 |             |
| 6011.943691 |             |             |             |             |             |
| ELMSAN1     | ELMSAN1     | 2646.127797 | 1383.235288 | 2216.067979 |             |
| 2383.28268  |             |             |             |             |             |
| MT01        | MT01        | 3749.559574 | 4763.122981 | 4352.671796 |             |
| 3798.356771 |             |             |             |             |             |
| LAMA3       | LAMA3       | 10.54234182 | 0           | 0           | 13.19855915 |
| FBXL5       | FBXL5       | 2272.460348 | 2512.572763 | 7364.274251 |             |
| 5570.734714 |             |             |             |             |             |
| USP34       | USP34       | 3065.478727 | 1572.135261 | 2199.10372  |             |
| 2363.484841 |             |             |             |             |             |
| CAPN10-AS1  | CAPN10-AS1  |             | 83.16736326 | 107.6526729 |             |
| 422.3207712 | 211.1769463 |             |             |             |             |
| SIX3-AS1    | SIX3-AS1    |             | 0           | 13.2026863  | 0           |
| EPN2        | EPN2        | 77.31050669 | 104.6058992 | 38.39279738 | 0           |
| 118.7870323 |             |             |             |             |             |
| RPL7L1      | RPL7L1      | 4201.708901 | 5879.25777  | 4907.135219 |             |
| 4858.955274 |             |             |             |             |             |
| THADA       | THADA       | 4471.124303 | 2932.01195  | 3017.852445 |             |



|             |             |             |             |             |             |
|-------------|-------------|-------------|-------------|-------------|-------------|
| 4255.59257  |             |             |             |             |             |
| ZC3HAV1     | ZC3HAV1     | 12585.21339 | 12676.61003 | 15496.40445 |             |
| 12117.22005 |             |             |             |             |             |
| NLRX1       | NLRX1       | 2060.44214  | 2103.289487 | 1125.891105 |             |
| 1138.847103 |             |             |             |             |             |
| SNIP1       | SNIP1       | 1097.574921 | 964.8116913 | 829.4629946 |             |
| 1086.995621 |             |             |             |             |             |
| TTLL7       | TTLL7       | 120.6512453 | 62.96665775 | 34.82137437 |             |
| 67.87830418 |             |             |             |             |             |
| XP04        | XP04        | 2674.240709 | 1852.438447 | 1855.354255 |             |
| 2446.447213 |             |             |             |             |             |
| DOLPP1      | DOLPP1      | 1498.18391  | 1911.34274  | 1080.355461 |             |
| 1202.954391 |             |             |             |             |             |
| POLR2J3     | POLR2J3     | 409.9799597 | 422.4859617 | 490.1778084 |             |
| 380.8727068 |             |             |             |             |             |
| HIST1H3C    | HIST1H3C    |             | 306.8992841 | 122.8865417 |             |
| 26.78567259 | 41.48118589 |             |             |             |             |
| HIST1H3A    | HIST1H3A    |             | 67.93953618 | 70.07579653 |             |
| 55.35705669 | 42.42394011 |             |             |             |             |
| HIST1H3D    | HIST1H3D    |             | 2172.893786 | 652.0095851 |             |
| 274.1067162 | 379.9299526 |             |             |             |             |
| HIST1H2BC   | HIST1H2BC   |             | 144.0786716 | 236.6327622 |             |
| 135.7140745 | 93.33266825 |             |             |             |             |
| CD52        | CD52        | 39954.30413 | 35852.40245 | 15244.61913 |             |
| 19564.03567 |             |             |             |             |             |
| CPNE6       | CPNE6       | 1.171371313 | 13.2026863  | 0.892855753 | 0           |
| ZBTB47      | ZBTB47      | 0           | 1.015591254 | 18.74997081 | 0           |
| MAP2K5      | MAP2K5      | 766.076839  | 628.6509863 | 716.9631697 |             |
| 953.1245212 |             |             |             |             |             |
| ADCY7       | ADCY7       | 7435.865098 | 6665.3254   | 3815.172633 |             |
| 4490.338372 |             |             |             |             |             |
| HLA-DRB6    | HLA-DRB6    |             | 48.02622385 | 44.68601518 |             |
| 18.74997081 | 16.02682182 |             |             |             |             |
| PRSS3P2     | PRSS3P2     | 0           | 0           | 1.785711506 | 3.771016899 |
| SNORD108    | SNORD108    |             | 1.171371313 | 1.015591254 |             |
| 0.892855753 | 1.885508449 |             |             |             |             |
| TNXA        | TNXA        | 3.51411394  | 0           | 0           | 0           |
| KIAA1958    | KIAA1958    |             | 216.703693  | 274.2096386 |             |
| 296.42811   | 267.7421998 |             |             |             |             |
| GLG1        | GLG1        | 15095.46212 | 13766.33945 | 13695.5144  |             |
| 12526.37538 |             |             |             |             |             |
| SNAP91      | SNAP91      | 0           | 0           | 1.785711506 | 0           |
| ANXA8       | ANXA8       | 0           | 0           | 2.678567259 | 0           |
| ANKRD13D    | ANKRD13D    |             | 2168.208301 | 1834.157805 |             |
| 1750.890132 | 1662.075698 |             |             |             |             |
| SLC30A5     | SLC30A5     | 4824.87844  | 4616.877841 | 5041.063582 |             |
| 4553.502905 |             |             |             |             |             |
| TRAPPC2     | TRAPPC2     | 1151.458001 | 1376.126149 | 1582.140394 |             |
| 1758.236629 |             |             |             |             |             |
| NR2E3       | NR2E3       | 0           | 0           | 1.885508449 |             |

|              |              |             |             |             |
|--------------|--------------|-------------|-------------|-------------|
| SNX16        | SNX16        | 237.7883766 | 248.8198572 | 561.6062687 |
| 332.7922413  |              |             |             |             |
| PDIK1L       | PDIK1L       | 1427.901631 | 1352.76755  | 1581.247539 |
| 1906.249042  |              |             |             |             |
| ST3GAL6      | ST3GAL6      | 4.685485254 | 0           | 3.771016899 |
| RAD51C       | RAD51C       | 4407.870253 | 4723.514923 | 2953.566831 |
| 3020.584536  |              |             |             |             |
| UBE2Q2       | UBE2Q2       | 3099.448495 | 3063.023222 | 2867.852679 |
| 3182.738263  |              |             |             |             |
| LINC00652    | LINC00652    |             | 21.08468364 | 14.21827756 |
| 53.57134518  | 58.45076193  |             |             |             |
| LOC100507144 | LOC100507144 |             | 8.199599194 | 0           |
| 10.37029647  |              |             |             | 12.49998054 |
| GALNT18      | GALNT18      | 62.08267961 | 50.7795627  | 0           |
| TIPARP       | TIPARP       | 2348.599483 | 1119.181562 | 81.07686333 |
| 1352.852312  |              |             |             | 1761.604401 |
| CDK10        | CDK10        | 2376.712395 | 2174.380875 | 2138.389529 |
| 2223.014462  |              |             |             |             |
| HAUS3        | HAUS3        | 2443.48056  | 2225.160438 | 3187.495038 |
| 3392.972455  |              |             |             |             |
| TRIM9        | TRIM9        | 17.5705697  | 8.124730032 | 31.24995136 |
| 14.14131337  |              |             |             |             |
| HSPA12B      | HSPA12B      | 7.028227881 | 3.046773762 | 4.464278765 |
| 3.771016899  |              |             |             |             |
| KDM1B        | KDM1B        | 643.0828511 | 118.8241767 | 115.1783921 |
| 479.8619004  |              |             |             |             |
| ANP32E       | ANP32E       | 21091.71187 | 16437.34445 | 8858.021926 |
| 13557.74851  |              |             |             |             |
| ZNF235       | ZNF235       | 412.3227023 | 385.9246765 | 587.4990855 |
| 558.110501   |              |             |             |             |
| SOCS6        | SOCS6        | 278.7863726 | 215.3053459 | 91.07128681 |
| 223.4327513  |              |             |             |             |
| CD68         | CD68         | 289.3287144 | 1134.415431 | 534.8205961 |
| 234.745802   |              |             |             |             |
| CD40         | CD40         | 53.88308042 | 103.5903079 | 546.4277209 |
| 399.7277913  |              |             |             |             |
| MSX2         | MSX2         | 0           | 1.015591254 | 8.035701777 |
| 0            |              |             |             | 0           |
| STK17B       | STK17B       | 13512.93947 | 8243.554209 | 8082.130276 |
| 12389.67602  |              |             |             |             |
| MFHAS1       | MFHAS1       | 1354.105238 | 702.7891478 | 518.7491925 |
| 602.4199496  |              |             |             |             |
| ACTL8        | ACTL8        | 9.370970508 | 0           | 0           |
| 0            |              |             |             | 0           |
| DZIP1L       | DZIP1L       | 14.05645576 | 3.046773762 | 0           |
| 0            |              |             |             | 0           |
| SMAP2        | SMAP2        | 32784.34032 | 42068.83652 | 24086.56965 |
| 28268.48543  |              |             |             |             |
| NBPF15       | NBPF15       | 599.7421125 | 502.7176708 | 863.3915132 |
| 648.6149066  |              |             |             |             |
| C9orf91      | C9orf91      | 2524.305181 | 1641.195467 | 1624.104615 |
| 1714.869935  |              |             |             |             |
| EEF1B2       | EEF1B2       | 8141.030629 | 9518.121233 | 8274.094263 |

|             |          |             |             |             |             |
|-------------|----------|-------------|-------------|-------------|-------------|
| 8664.854079 |          |             |             |             |             |
| ANKRD55     | ANKRD55  | 188.5907815 | 159.4478269 | 376.7851278 |             |
| 173.4667773 |          |             |             |             |             |
| RBCK1       | RBCK1    | 5156.376522 | 5781.761009 | 6608.025428 |             |
| 6375.846822 |          |             |             |             |             |
| GRID1       | GRID1    | 0           | 0           | 2.828262674 |             |
| EPDR1       | EPDR1    | 46.85485254 | 0           | 22.32139383 | 44.30944856 |
| FOXRED1     | FOXRED1  | 2673.069337 | 3584.021536 | 1616.961769 |             |
| 1977.898363 |          |             |             |             |             |
| NME6        | NME6     | 1515.75448  | 2137.81959  | 2047.318242 |             |
| 1947.730228 |          |             |             |             |             |
| HES1        | HES1     | 203.8186085 | 186.8687907 | 8.92855753  |             |
| 23.56885562 |          |             |             |             |             |
| CYTH4       | CYTH4    | 2846.432292 | 2029.151326 | 1463.390579 |             |
| 1716.755443 |          |             |             |             |             |
| TOMM40      | TOMM40   | 5889.654964 | 8323.785918 | 5015.170765 |             |
| 5399.153445 |          |             |             |             |             |
| COPS5       | COPS5    | 5523.015743 | 5917.850237 | 4895.528094 |             |
| 5436.863614 |          |             |             |             |             |
| CTRC        | CTRC     | 1.171371313 | 0           | 1.785711506 | 3.771016899 |
| PTPDC1      | PTPDC1   | 352.5827654 | 426.5483267 | 456.2492898 |             |
| 432.7241891 |          |             |             |             |             |
| NGLY1       | NGLY1    | 3160.359804 | 3658.159697 | 3811.60121  |             |
| 4211.283122 |          |             |             |             |             |
| DESI2       | DESI2    | 2595.758831 | 2321.641607 | 1678.568816 |             |
| 2345.572511 |          |             |             |             |             |
| FBX042      | FBX042   | 2955.369824 | 3536.288747 | 3798.208373 |             |
| 3139.371568 |          |             |             |             |             |
| PSMA5       | PSMA5    | 16954.42839 | 20607.36214 | 13916.04977 |             |
| 12938.35898 |          |             |             |             |             |
| WSB2        | WSB2     | 6557.336613 | 6114.874941 | 2401.781976 |             |
| 3701.253086 |          |             |             |             |             |
| ZMPSTE24    | ZMPSTE24 |             | 7269.530371 | 7771.304276 |             |
| 4617.849955 |          |             |             |             |             |
| RAMP3       | RAMP3    | 0           | 11.17150379 | 1.785711506 | 0           |
| GDPD3       | GDPD3    | 18.74194102 | 4.062365016 | 22.32139383 |             |
| 23.56885562 |          |             |             |             |             |
| UHRF1BP1    | UHRF1BP1 |             | 937.0970508 | 682.4773227 |             |
| 449.9992995 |          |             |             |             |             |
| CBX4        | CBX4     | 675.8812479 | 497.6397145 | 1114.28398  |             |
| 765.5164305 |          |             |             |             |             |
| CHST1       | CHST1    | 4.685485254 | 0           | 0           | 6.599279573 |
| DGKD        | DGKD     | 1863.65176  | 1183.163811 | 2047.318242 |             |
| 1935.474423 |          |             |             |             |             |
| TRIB2       | TRIB2    | 2593.416088 | 1303.003579 | 1208.033834 |             |
| 1153.931171 |          |             |             |             |             |
| SENP5       | SENP5    | 2120.182077 | 1892.046506 | 1764.282968 |             |
| 1616.823495 |          |             |             |             |             |
| PPARA       | PPARA    | 285.8146005 | 173.6661044 | 421.4279154 |             |
| 349.7618174 |          |             |             |             |             |

|             |           |             |             |             |             |
|-------------|-----------|-------------|-------------|-------------|-------------|
| PCP4L1      | PCP4L1    | 14.05645576 | 4.062365016 | 0           | 3.771016899 |
| PGRMC1      | PGRMC1    | 2721.095561 | 3288.484481 | 2151.782365 |             |
| 2457.760264 |           |             |             |             |             |
| NFE2        | NFE2      | 7.028227881 | 2.031182508 | 2.678567259 |             |
| 4.713771124 |           |             |             |             |             |
| ZNF254      | ZNF254    | 921.8692237 | 570.7622848 | 1907.139888 |             |
| 1557.429979 |           |             |             |             |             |
| ZNF341      | ZNF341    | 694.6231889 | 692.6332353 | 483.9278181 |             |
| 511.915544  |           |             |             |             |             |
| METTL9      | METTL9    | 5383.622557 | 6821.726453 | 6602.668294 |             |
| 5644.269543 |           |             |             |             |             |
| MTL5        | MTL5      | 106.5947895 | 119.839768  | 108.9284019 |             |
| 169.6957604 |           |             |             |             |             |
| CD3D        | CD3D      | 20401.77417 | 20529.16161 | 13179.44377 |             |
| 15138.74734 |           |             |             |             |             |
| SAPCD1      | SAPCD1    | 4.685485254 | 1.015591254 | 0           | 0.942754225 |
| SH3RF3      | SH3RF3    | 2.342742627 | 3.046773762 | 2.678567259 |             |
| 23.56885562 |           |             |             |             |             |
| KLC2        | KLC2      | 1980.788891 | 1680.803525 | 1552.676155 |             |
| 1700.728621 |           |             |             |             |             |
| PYY2        | PYY2      | 2.342742627 | 0           | 0           | 0           |
| NOL3        | NOL3      | 126.5081019 | 87.34084785 | 36.60708587 |             |
| 62.22177883 |           |             |             |             |             |
| CDC14C      | CDC14C    | 1.171371313 | 0           | 0           | 0           |
| MY015B      | MY015B    | 42.16936728 | 5.07795627  | 27.67852834 |             |
| 104.6457189 |           |             |             |             |             |
| YOD1        | YOD1      | 522.4316058 | 380.8467203 | 548.2134324 |             |
| 704.2374059 |           |             |             |             |             |
| PPP1R3E     | PPP1R3E   | 90.19559114 | 61.9510665  | 334.8209074 |             |
| 301.6813519 |           |             |             |             |             |
| CDKL1       | CDKL1     | 149.9355281 | 113.7462205 | 240.1781976 |             |
| 215.8907175 |           |             |             |             |             |
| COL4A3      | COL4A3    | 11.71371313 | 1.015591254 | 15.1785478  |             |
| 17.91233027 |           |             |             |             |             |
| PDE4DIP     | PDE4DIP   | 9727.067387 | 15357.77094 | 7533.023988 |             |
| 6665.272369 |           |             |             |             |             |
| IPP         | IPP       | 1924.563068 | 1625.961598 | 1517.85478  |             |
| 1946.787474 |           |             |             |             |             |
| CA6         | CA6       | 283.4718579 | 997.3106115 | 155.356901  |             |
| 62.22177883 |           |             |             |             |             |
| GDF1        | GDF1      | 0           | 3.046773762 | 0           | 0           |
| LINC00901   | LINC00901 | 0           | 0           | 0           | 6.599279573 |
| KIF20B      | KIF20B    | 3791.728942 | 3706.908077 | 1814.28289  |             |
| 2621.799499 |           |             |             |             |             |
| ZNF460      | ZNF460    | 309.2420268 | 283.3499599 | 731.2488617 |             |
| 703.2946516 |           |             |             |             |             |
| 2-Sep       | 2-Sep     | 20655.96174 | 28849.90075 | 29333.88291 |             |
| 21947.31835 |           |             |             |             |             |
| LYSMD1      | LYSMD1    | 91.36696245 | 46.71719769 | 84.82129654 |             |
| 61.27902461 |           |             |             |             |             |

|             |         |             |             |             |
|-------------|---------|-------------|-------------|-------------|
| RNF175      | RNF175  | 1.171371313 | 3.046773762 | 26.78567259 |
| 16.96957604 |         |             |             |             |
| VANGL1      | VANGL1  | 2531.333408 | 2681.160911 | 406.2493676 |
| 764.5736762 |         |             |             |             |
| KPNA3       | KPNA3   | 5757.290006 | 3818.623115 | 3667.851433 |
| 4645.892819 |         |             |             |             |
| TIGD3       | TIGD3   | 24.59879758 | 39.60805891 | 81.24987353 |
| 79.19135488 |         |             |             |             |
| GADL1       | GADL1   | 0           | 1.015591254 | 4.464278765 |
| 0           |         |             |             | 0           |
| ZNF483      | ZNF483  | 21.08468364 | 49.76397145 | 55.35705669 |
| 62.22177883 |         |             |             |             |
| GSC         | GSC     | 3.51411394  | 0           | 8.035701777 |
| 0           |         |             |             | 4.713771124 |
| ZFP41       | ZFP41   | 346.7259088 | 230.5392147 | 604.4633448 |
| 592.9924073 |         |             |             |             |
| CEP57L1     | CEP57L1 | 845.7300883 | 970.9052389 | 523.2134713 |
| 703.2946516 |         |             |             |             |
| RARB        | RARB    | 16.39919839 | 3.046773762 | 0.892855753 |
| 6.599279573 |         |             |             |             |
| MAPK11      | MAPK11  | 108.9375322 | 14.21827756 | 23.21424958 |
| 46.19495701 |         |             |             |             |
| VSTM4       | VSTM4   | 30.45565415 | 13.2026863  | 1.785711506 |
| 79.19135488 |         |             |             |             |
| ZFC3H1      | ZFC3H1  | 2104.95425  | 1546.74548  | 1970.532647 |
| 2414.393569 |         |             |             |             |
| AP1S3       | AP1S3   | 234.2742627 | 332.0983401 | 286.6066967 |
| 317.7081737 |         |             |             |             |
| ZNF276      | ZNF276  | 2718.752819 | 2079.930888 | 2741.067162 |
| 2469.073315 |         |             |             |             |
| ZNF214      | ZNF214  | 1.171371313 | 6.093547524 | 0           |
| 0           |         |             |             | 16.02682182 |
| RPS6KA3     | RPS6KA3 | 9130.839388 | 5470.990086 | 4963.385131 |
| 6425.812796 |         |             |             |             |
| RC3H2       | RC3H2   | 3789.386199 | 2417.107185 | 2245.532219 |
| 2755.670599 |         |             |             |             |
| FL0T2       | FL0T2   | 11595.40463 | 16138.76062 | 8408.022626 |
| 9960.198384 |         |             |             |             |
| FUT7        | FUT7    | 1713.716232 | 385.9246765 | 529.4634615 |
| 856.020836  |         |             |             |             |
| FRG1        | FRG1    | 2127.210305 | 2327.735154 | 1989.282618 |
| 2021.265058 |         |             |             |             |
| PDZD7       | PDZD7   | 65.59679355 | 64.99784026 | 161.6068913 |
| 110.3022443 |         |             |             |             |
| FAM170B     | FAM170B | 3.51411394  | 0           | 0           |
| 0           |         |             | 0           | 0           |
| INCA1       | INCA1   | 83.16736326 | 99.5279429  | 133.0355072 |
| 150.840676  |         |             |             |             |
| ZBTB24      | ZBTB24  | 2562.960434 | 2887.325935 | 2952.673975 |
| 2688.735049 |         |             |             |             |
| RPS13       | RPS13   | 12459.87666 | 11940.30637 | 15032.11946 |
| 13683.13482 |         |             |             |             |
| NUDT14      | NUDT14  | 206.1613512 | 432.6418742 | 406.2493676 |
| 379.9299526 |         |             |             |             |

|                 |                   |                 |             |   |
|-----------------|-------------------|-----------------|-------------|---|
| SETDB2 SETDB2   | 1661.004522       | 1283.707345     | 2376.782015 |   |
| 2185.304293     |                   |                 |             |   |
| ZNF540 ZNF540   | 33.96976809       | 57.88870148     | 466.9635588 |   |
| 464.7778328     |                   |                 |             |   |
| GNAL GNAL       | 988.6373886       | 850.0498796     | 1019.64127  |   |
| 960.666555      |                   |                 |             |   |
| CCND3 CCND3     | 34075.19151       | 49276.48765     | 23376.74933 |   |
| 23382.19028     |                   |                 |             |   |
| DLGAP2 DLGAP2   | 4.685485254       | 1.015591254     | 8.92855753  | 0 |
| RPL41 RPL41     | 5935.338445       | 7715.446757     | 8399.094069 |   |
| 7533.54901      |                   |                 |             |   |
| TMSB10 TMSB10   | 104264.932        | 107113.394      | 47857.06836 |   |
| 50990.74775     |                   |                 |             |   |
| UBASH3A UBASH3A | 3695.676494       | 4718.436966     | 3028.566714 |   |
| 3401.457243     |                   |                 |             |   |
| OPN1LW OPN1LW   | 4.685485254       | 0 0 0           |             |   |
| COBLL1 COBLL1   | 3.51411394        | 0 16.07140355 0 |             |   |
| WDR16 WDR16     | 0 2.031182508 0 0 |                 |             |   |
| SNORD49B        | SNORD49B          | 131.1935871     | 146.2451406 |   |
| 234.821063      | 213.0624548       |                 |             |   |
| SNORD45C        | SNORD45C          | 8.199599194     | 12.18709505 |   |
| 8.035701777     | 18.85508449       |                 |             |   |
| ZNF70 ZNF70     | 37.48388203       | 28.43655511     | 134.8212187 |   |
| 95.2181767      |                   |                 |             |   |
| ZNF69 ZNF69     | 26.94154021       | 22.34300759     | 143.7497762 |   |
| 110.3022443     |                   |                 |             |   |
| MPP7 MPP7       | 70.28227881       | 81.24730032     | 1899.104187 |   |
| 1604.56769      |                   |                 |             |   |
| MTIF3 MTIF3     | 2524.305181       | 2897.481848     | 2613.388789 |   |
| 2347.45802      |                   |                 |             |   |
| TNFRSF25        | TNFRSF25          | 6877.120981     | 8296.364954 |   |
| 6787.489435     | 7907.822437       |                 |             |   |
| FGFR1 FGFR1     | 3524.656282       | 2767.486167     | 730.356006  |   |
| 978.5788853     |                   |                 |             |   |
| PLEKHD1 PLEKHD1 | 0 0               | 11.60712479     | 5.656525348 |   |
| TCOF1 TCOF1     | 7433.522355       | 8922.984758     | 7544.631113 |   |
| 6795.372452     |                   |                 |             |   |
| RPS3A RPS3A     | 16142.66807       | 16691.24226     | 20803.53905 |   |
| 19496.15737     |                   |                 |             |   |
| ADH6 ADH6       | 1.171371313       | 0 0             | 1.885508449 |   |
| CCNA1 CCNA1     | 161.6492413       | 282.3343686     | 24.10710533 |   |
| 14.14131337     |                   |                 |             |   |
| IL15RA IL15RA   | 1396.274606       | 2175.396466     | 2180.353749 |   |
| 1980.726626     |                   |                 |             |   |
| ADRM1 ADRM1     | 9628.672197       | 14731.15114     | 9783.020486 |   |
| 8636.571453     |                   |                 |             |   |
| RNU12 RNU12     | 3.51411394        | 14.21827756     | 2.678567259 | 0 |
| LINC01140       | LINC01140         | 3.51411394      | 1.015591254 | 0 |
| 3.771016899     |                   |                 |             |   |
| LOC145837       | LOC145837         | 0 0 0           | 3.771016899 |   |

|             |             |             |             |             |
|-------------|-------------|-------------|-------------|-------------|
| VPS9D1      | VPS9D1      | 217.8750643 | 139.1360018 | 188.3925639 |
| 151.7834302 |             |             |             |             |
| CDK17       | CDK17       | 3878.410419 | 3882.605364 | 6947.310614 |
| 5776.255135 |             |             |             |             |
| SLC44A3     | SLC44A3     | 16.39919839 | 0           | 4.713771124 |
| RNU5E-1     | RNU5E-1     | 0           | 0           | 0.942754225 |
| ATRX        | ATRX        | 4068.172572 | 3676.44034  | 4629.457079 |
| 5886.557379 |             |             |             |             |
| ATP1A4      | ATP1A4      | 3.51411394  | 12.18709505 | 6.249990271 |
| 0.942754225 |             |             |             |             |
| SPINK7      | SPINK7      | 0           | 4.062365016 | 0           |
| DGAT2       | DGAT2       | 236.6170053 | 360.5348952 | 328.5709171 |
| 274.3414794 |             |             |             |             |
| POLB        | POLB        | 1830.853363 | 1660.4917   | 1584.818962 |
| 1519.71981  |             |             |             |             |
| CTRL        | CTRL        | 467.3771541 | 238.6639447 | 564.2848359 |
| 353.5328343 |             |             |             |             |
| CSNK2A2     | CSNK2A2     | 176.8770683 | 136.089228  | 141.071209  |
| 143.2986422 |             |             |             |             |
| MUT         | MUT         | 3856.154364 | 3180.831808 | 2495.53183  |
| 3194.994068 |             |             |             |             |
| SERPIND1    | SERPIND1    |             | 22.25605496 | 7.109138778 |
| 33.03566286 | 68.8210584  |             |             |             |
| HADHB       | HADHB       | 7262.502143 | 9189.069667 | 4795.52825  |
| 6135.444494 |             |             |             |             |
| STOM        | STOM        | 3236.498939 | 1582.291174 | 8424.986886 |
| 7784.321633 |             |             |             |             |
| THEMIS2     | THEMIS2     | 3122.875922 | 5560.362116 | 2495.53183  |
| 2216.415182 |             |             |             |             |
| BOLA2B      | BOLA2B      | 576.3146862 | 444.8289693 | 258.9281684 |
| 455.3502905 |             |             |             |             |
| FCGR2B      | FCGR2B      | 0           | 16.07140355 | 0           |
| TSHZ3       | TSHZ3       | 55.05445173 | 13.2026863  | 38.39279738 |
| 14.14131337 |             |             |             |             |
| MYOM1       | MYOM1       | 28.11291152 | 27.42096386 | 85.71415229 |
| 181.9515654 |             |             |             |             |
| RWDD3       | RWDD3       | 688.7663323 | 780.9896744 | 738.3917078 |
| 846.5932938 |             |             |             |             |
| KIAA1468    | KIAA1468    |             | 1482.956083 | 1255.27079  |
| 1960.711234 | 1567.800276 |             |             |             |
| KIAA1467    | KIAA1467    |             | 332.669453  | 246.7886747 |
| 168.7497373 | 298.8530892 |             |             |             |
| METTL3      | METTL3      | 3849.126136 | 4041.0376   | 2255.353632 |
| 3530.614572 |             |             |             |             |
| IQCF6       | IQCF6       | 1.171371313 | 0           | 0           |
| DAW1        | DAW1        | 3.51411394  | 0           | 0           |
| AGPAT6      | AGPAT6      | 5462.104435 | 5589.814262 | 4443.743083 |
| 5363.328784 |             |             |             |             |
| CMTM4       | CMTM4       | 17.5705697  | 6.093547524 | 30.3570956  |
| 41.48118589 |             |             |             |             |

|             |         |             |             |             |
|-------------|---------|-------------|-------------|-------------|
| ARL5B       | ARL5B   | 1170.199942 | 742.3972067 | 785.7130627 |
| 738.176558  |         |             |             |             |
| TSACC       | TSACC   | 56.22582305 | 42.65483267 | 112.4998249 |
| 98.04643937 |         |             |             |             |
| WDR64       | WDR64   | 5.856856567 | 4.062365016 | 128.5712284 |
| 51.85148236 |         |             |             |             |
| FAM91A1     | FAM91A1 | 6925.147205 | 6759.775387 | 4890.170959 |
| 5109.727898 |         |             |             |             |
| MED25       | MED25   | 1509.897623 | 1068.401999 | 702.6774776 |
| 723.0924904 |         |             |             |             |
| TUBA4B      | TUBA4B  | 8.199599194 | 9.140321286 | 3.571423012 |
| 5.656525348 |         |             |             |             |
| SCARNA9     | SCARNA9 | 114.7943887 | 61.9510665  | 57.14276819 |
| 48.08046546 |         |             |             |             |
| LRIG1       | LRIG1   | 6618.247921 | 7711.384392 | 6621.418264 |
| 7892.738369 |         |             |             |             |
| PYG01       | PYG01   | 0           | 4.464278765 | 0           |
| UBXN7       | UBXN7   | 3976.805609 | 3648.003785 | 3612.494377 |
| 3392.029701 |         |             |             |             |
| WDHD1       | WDHD1   | 5353.166903 | 4505.162803 | 2214.282268 |
| 3338.29271  |         |             |             |             |
| APRT        | APRT    | 8165.629426 | 11122.75541 | 9334.806898 |
| 9255.018224 |         |             |             |             |
| ANGPTL4     | ANGPTL4 | 23.42742627 | 17.26505132 | 30.3570956  |
| 16.02682182 |         |             |             |             |
| SDCBP2      | SDCBP2  | 86.6814772  | 280.3031861 | 255.3567454 |
| 140.4703795 |         |             |             |             |
| TPMT        | TPMT    | 1317.792728 | 1675.725569 | 1122.319682 |
| 1310.428372 |         |             |             |             |
| MDFIC       | MDFIC   | 6335.947435 | 8689.39877  | 6704.45385  |
| 7663.649093 |         |             |             |             |
| SCD5        | SCD5    | 8.199599194 | 0           | 21.42853807 |
| NCKAP5L     | NCKAP5L | 59.73993699 | 72.10697904 | 14.14131337 |
| 273.3987252 |         |             |             | 324.9994941 |
| H2AFB2      | H2AFB2  | 0           | 1.015591254 | 0.892855753 |
| OPA3        | OPA3    | 1659.833151 | 1659.476109 | 3.771016899 |
| 1295.533698 |         |             |             |             |
| 1537.632141 |         |             |             |             |
| HILPDA      | HILPDA  | 459.1775549 | 559.590781  | 421.4279154 |
| 544.9119419 |         |             |             |             |
| FAM89B      | FAM89B  | 4156.02542  | 3970.961803 | 2823.209891 |
| 3863.406813 |         |             |             |             |
| RPP14       | RPP14   | 1656.319037 | 2098.211531 | 2283.925016 |
| 1822.343916 |         |             |             |             |
| FANCL       | FANCL   | 1685.60332  | 1751.894913 | 1244.64092  |
| 1700.728621 |         |             |             |             |
| EIF4E1B     | EIF4E1B | 0           | 0.892855753 | 0           |
| LRCH1       | LRCH1   | 1382.21815  | 1092.776189 | 1257.1409   |
| 1210.496425 |         |             |             |             |
| GDA         | GDA     | 0           | 3.571423012 | 0           |
| C8orf76     | C8orf76 | 1658.66178  | 2024.073369 | 1256.248045 |



|             |             |             |             |             |             |
|-------------|-------------|-------------|-------------|-------------|-------------|
| 1332.11172  |             |             |             |             |             |
| TRAF6       | TRAF6       | 816.4458055 | 1075.511138 | 1654.46171  |             |
| 1697.900359 |             |             |             |             |             |
| BPNT1       | BPNT1       | 1341.220154 | 1235.974556 | 989.2841744 |             |
| 894.6737593 |             |             |             |             |             |
| FDX1        | FDX1        | 2774.978642 | 3097.553325 | 2287.496439 |             |
| 2310.690605 |             |             |             |             |             |
| GPX3        | GPX3        | 22.25605496 | 12.18709505 | 30.3570956  |             |
| 20.74059294 |             |             |             |             |             |
| ERCC1       | ERCC1       | 3029.166217 | 4536.646132 | 3302.67343  |             |
| 3444.823937 |             |             |             |             |             |
| IKBKAP      | IKBKAP      | 5135.291838 | 4067.442972 | 3944.636717 |             |
| 4803.332775 |             |             |             |             |             |
| KMT2D       | KMT2D       | 1199.484225 | 510.8424008 | 935.7128292 |             |
| 1058.712994 |             |             |             |             |             |
| SLC39A11    | SLC39A11    |             | 500.1755508 | 722.0853816 |             |
| 497.3206544 | 540.1981708 |             |             |             |             |
| ERI1        | ERI1        | 5333.25359  | 7123.357056 | 2947.316841 |             |
| 3763.474865 |             |             |             |             |             |
| KCTD6       | KCTD6       | 723.9074717 | 539.2789559 | 619.6418926 |             |
| 681.6113045 |             |             |             |             |             |
| FAM3B       | FAM3B       | 2.342742627 | 3.046773762 | 4.464278765 |             |
| 1.885508449 |             |             |             |             |             |
| TLR7        | TLR7        | 3.51411394  | 11.17150379 | 0           | 22.62610139 |
| LINC00341   | LINC00341   |             | 83.16736326 | 43.67042392 |             |
| 8.92855753  | 68.8210584  |             |             |             |             |
| SAMD14      | SAMD14      | 29.28428284 | 12.18709505 | 41.07136464 |             |
| 26.39711829 |             |             |             |             |             |
| LINC00239   | LINC00239   |             | 297.5283136 | 170.6193307 |             |
| 78.57130627 | 186.6653365 |             |             |             |             |
| TBXAS1      | TBXAS1      | 695.7945602 | 573.8090585 | 283.9281295 |             |
| 568.4807975 |             |             |             |             |             |
| ISL2        | ISL2        | 111.2802748 | 53.82633646 | 11.60712479 |             |
| 21.68334717 |             |             |             |             |             |
| PCDH8       | PCDH8       | 103.0806756 | 55.85751897 | 45.5356434  | 0           |
| ERN1        | ERN1        | 1144.429773 | 918.0944937 | 1713.39019  |             |
| 2084.429591 |             |             |             |             |             |
| AGTRAP      | AGTRAP      | 1131.544689 | 1872.750272 | 816.0701583 |             |
| 741.9475749 |             |             |             |             |             |
| ZMAT5       | ZMAT5       | 1467.728256 | 1933.685748 | 1432.140628 |             |
| 1154.873925 |             |             |             |             |             |
| KIAA0556    | KIAA0556    |             | 719.2219865 | 478.3434807 |             |
| 391.9636756 | 454.4075363 |             |             |             |             |
| HAS3        | HAS3        | 2338.057142 | 2747.174342 | 2465.174734 |             |
| 1986.383151 |             |             |             |             |             |
| UCHL5       | UCHL5       | 6125.100598 | 6887.739885 | 5415.170142 |             |
| 6390.930889 |             |             |             |             |             |
| KIF21B      | KIF21B      | 2327.5148   | 1196.366497 | 1589.28324  |             |
| 1669.617732 |             |             |             |             |             |
| WWC1        | WWC1        | 4.685485254 | 15.23386881 | 12.49998054 |             |

|             |           |             |             |             |             |
|-------------|-----------|-------------|-------------|-------------|-------------|
| 7.542033798 |           |             |             |             |             |
| LPHN3       | LPHN3     | 2.342742627 | 0           | 0.892855753 | 0           |
| PLSCR3      | PLSCR3    | 5260.628569 | 6909.067301 | 3240.173528 |             |
| 3629.603765 |           |             |             |             |             |
| ZNF684      | ZNF684    | 298.6996849 | 254.9134048 | 212.4996692 |             |
| 294.1393181 |           |             |             |             |             |
| UBAC2       | UBAC2     | 2773.80727  | 2555.227595 | 5660.705474 |             |
| 4275.390409 |           |             |             |             |             |
| HMG1        | HMG1      | 14499.23412 | 16230.16383 | 13455.3362  |             |
| 15250.93509 |           |             |             |             |             |
| GID8        | GID8      | 2297.059146 | 2121.57013  | 2533.924627 |             |
| 2439.847934 |           |             |             |             |             |
| B3GNT3      | B3GNT3    | 0           | 0           | 1.885508449 |             |
| COR02A      | COR02A    | 1259.224162 | 832.7848283 | 1434.819195 |             |
| 1604.56769  |           |             |             |             |             |
| WIPF1       | WIPF1     | 18971.52979 | 10514.41625 | 9559.806548 |             |
| 10652.17999 |           |             |             |             |             |
| ALPK3       | ALPK3     | 0           | 3.046773762 | 0           | 16.96957604 |
| MSL3        | MSL3      | 3625.394215 | 3155.442026 | 5917.847931 |             |
| 5995.916869 |           |             |             |             |             |
| DCAF6       | DCAF6     | 2059.270769 | 1801.658885 | 1727.675882 |             |
| 2029.749846 |           |             |             |             |             |
| RPA3        | RPA3      | 5911.911019 | 5207.951951 | 4167.850655 |             |
| 4379.093374 |           |             |             |             |             |
| KLK2        | KLK2      | 1.171371313 | 2.031182508 | 0           | 0           |
| SMPDL3B     | SMPDL3B   | 21.08468364 | 58.90429273 | 0           | 10.37029647 |
| SH2D4B      | SH2D4B    | 2.342742627 | 8.124730032 | 9.821413283 | 0           |
| DYNC1H1     | DYNC1H1   | 6864.235897 | 4217.750478 | 5893.740826 |             |
| 5042.792348 |           |             |             |             |             |
| GTF2E1      | GTF2E1    | 2063.956254 | 2191.645926 | 1933.032705 |             |
| 1686.587308 |           |             |             |             |             |
| TBC1D31     | TBC1D31   | 1787.512624 | 1322.299813 | 1005.355578 |             |
| 1375.478414 |           |             |             |             |             |
| SLC1A2      | SLC1A2    | 0           | 4.062365016 | 21.42853807 | 0.942754225 |
| TGFBR3      | TGFBR3    | 1970.246549 | 1624.946006 | 1199.105276 |             |
| 1828.000442 |           |             |             |             |             |
| ACTB        | ACTB      | 1612350.444 | 2060037.487 | 658009.69   |             |
| 980398.4009 |           |             |             |             |             |
| ACTA1       | ACTA1     | 0           | 4.062365016 | 0           | 1.885508449 |
| B3GAT1      | B3GAT1    | 2.342742627 | 0           | 0           | 1.885508449 |
| NADK        | NADK      | 3789.386199 | 3252.938787 | 1793.747208 |             |
| 1831.771459 |           |             |             |             |             |
| UPF3A       | UPF3A     | 940.6111647 | 1451.279902 | 1451.783454 |             |
| 1193.526848 |           |             |             |             |             |
| ABCA6       | ABCA6     | 0           | 2.031182508 | 0           | 0           |
| LINC00491   | LINC00491 | 0           | 0           | 2.031182508 | 8.035701777 |
| 0           |           |             |             |             |             |
| KMT2A       | KMT2A     | 6312.520008 | 3482.46241  | 5380.348768 |             |
| 6136.387249 |           |             |             |             |             |
| CNGA1       | CNGA1     | 0           | 3.046773762 | 32.14280711 | 4.713771124 |

|               |              |               |             |   |
|---------------|--------------|---------------|-------------|---|
| LOC100132352  | LOC100132352 | 181.5625536   | 204.1338421 |   |
| 349.1065994   | 328.0784702  |               |             |   |
| SYT12 SYT12   | 0 0          | 19.64282657   | 0           |   |
| EFNA4 EFNA4   | 147.5927855  | 251.866631    | 170.5354488 |   |
| 102.7602105   |              |               |             |   |
| E2F1 E2F1     | 7271.873114  | 7771.304276   | 2530.353204 |   |
| 3503.274699   |              |               |             |   |
| BTLA BTLA     | 1022.607157  | 1033.871897   | 844.6415424 |   |
| 1433.929176   |              |               |             |   |
| NAA16 NAA16   | 1431.415745  | 1023.715984   | 1497.319098 |   |
| 1466.925574   |              |               |             |   |
| PAXBP1-AS1    | PAXBP1-AS1   | 210.8468364   | 152.3386881 |   |
| 195.5354099   | 254.5436407  |               |             |   |
| LOC151475     | LOC151475    | 0 4.062365016 | 0           | 0 |
| PMM2 PMM2     | 1423.216146  | 1457.37345    | 1423.21207  |   |
| 1435.814684   |              |               |             |   |
| DOT1L DOT1L   | 1520.439965  | 1298.941214   | 1083.926884 |   |
| 1060.598503   |              |               |             |   |
| FAM76B FAM76B | 1625.863383  | 1139.493387   | 1666.068835 |   |
| 1745.980824   |              |               |             |   |
| DOCK11 DOCK11 | 5442.191122  | 3040.680215   | 1833.032861 |   |
| 2637.826321   |              |               |             |   |
| TRAP1 TRAP1   | 9450.623757  | 13669.85828   | 8330.344176 |   |
| 9753.735209   |              |               |             |   |
| CRBN CRBN     | 3542.226852  | 3311.843079   | 4871.420989 |   |
| 4745.824767   |              |               |             |   |
| HP1BP3 HP1BP3 | 13214.23979  | 10584.49205   | 10437.48375 |   |
| 11142.41218   |              |               |             |   |
| CSTF2 CSTF2   | 5694.035955  | 7958.173067   | 4432.135958 |   |
| 4237.68024    |              |               |             |   |
| TAF5 TAF5     | 1758.228342  | 1727.520723   | 1456.247733 |   |
| 1756.351121   |              |               |             |   |
| IFNA21 IFNA21 | 3.51411394   | 0 0           | 0           |   |
| OPRM1 OPRM1   | 219.0464356  | 215.3053459   | 601.7847775 |   |
| 459.1213074   |              |               |             |   |
| SPATA31C2     | SPATA31C2    | 9.370970508   | 17.26505132 | 0 |
| 11.3130507    |              |               |             |   |
| GRIK5 GRIK5   | 7.028227881  | 1.015591254   | 4.464278765 |   |
| 1.885508449   |              |               |             |   |
| DRD3 DRD3     | 0 0          | 3.571423012   | 0           |   |
| ARHGAP17      | ARHGAP17     | 2722.266932   | 2438.434601 |   |
| 3180.352192   | 2785.838734  |               |             |   |
| INPP5B INPP5B | 2551.246721  | 2867.01411    | 3431.244659 |   |
| 2379.511663   |              |               |             |   |
| FXR2 FXR2     | 3044.394044  | 3535.273155   | 3208.923576 |   |
| 2964.962037   |              |               |             |   |
| RHD RHD       | 38.65525334  | 57.88870148   | 106.2498346 |   |
| 134.8138541   |              |               |             |   |
| CD79A CD79A   | 144.0786716  | 156.4010531   | 163.3926028 |   |
| 100.874702    |              |               |             |   |

|             |             |             |             |             |
|-------------|-------------|-------------|-------------|-------------|
| CD69        | CD69        | 4159.539534 | 3946.587613 | 10389.26954 |
| 11500.65879 |             |             |             |             |
| CD63        | CD63        | 3669.906325 | 5322.713762 | 4680.349857 |
| 4644.007311 |             |             |             |             |
| SLA         | SLA         | 16851.34772 | 12447.08641 | 9595.520778 |
| 11898.50107 |             |             |             |             |
| CNNM2       | CNNM2       | 286.9859718 | 323.97361   | 598.2133545 |
| 249.8298695 |             |             |             |             |
| PLCG2       | PLCG2       | 1190.113254 | 1207.538001 | 258.9281684 |
| 396.8995286 |             |             |             |             |
| MCM4        | MCM4        | 28040.2865  | 33931.91939 | 11683.91038 |
| 15017.13205 |             |             |             |             |
| C11orf95    | C11orf95    |             | 25.7701689  | 24.3741901  |
| 74.1070275  | 20.74059294 |             |             |             |
| C5orf55     | C5orf55     | 140.5645576 | 162.4946006 | 284.8209852 |
| 201.7494041 |             |             |             |             |
| NFKB1       | NFKB1       | 14459.40749 | 22548.15702 | 20361.57545 |
| 19263.29707 |             |             |             |             |
| RNF17       | RNF17       | 0           | 2.678567259 | 0           |
| MORN2       | MORN2       | 338.5263096 | 381.8623115 | 358.9280127 |
| 292.2538097 |             |             |             |             |
| GREM2       | GREM2       | 31.62702546 | 29.45214637 | 57.14276819 |
| 168.7530062 |             |             |             |             |
| DAPK2       | DAPK2       | 154.6210134 | 73.12257029 | 30.3570956  |
| 167.810252  |             |             |             |             |
| METTL5      | METTL5      | 3564.482907 | 3650.034967 | 3130.35227  |
| 3520.244275 |             |             |             |             |
| IGSF8       | IGSF8       | 2210.377669 | 2431.325462 | 3587.494416 |
| 2488.871153 |             |             |             |             |
| IQSEC2      | IQSEC2      | 3.51411394  | 6.093547524 | 0           |
| C11orf84    | C11orf84    |             | 292.8428284 | 6.599279573 |
| 81.24987353 | 59.39351616 |             |             |             |
| AES         | AES         | 20632.53432 | 24150.76002 | 12463.37346 |
| 9828.212793 |             |             |             |             |
| GSDMB       | GSDMB       | 204.9899799 | 110.6994467 | 318.7495038 |
| 317.7081737 |             |             |             |             |
| VSIG10      | VSIG10      | 131.1935871 | 109.6838554 | 65.17846997 |
| 156.4972013 |             |             |             |             |
| TAC01       | TAC01       | 2045.214313 | 1986.496493 | 1318.747947 |
| 1432.043667 |             |             |             |             |
| PPOX        | PPOX        | 872.6716285 | 1569.088488 | 829.4629946 |
| 845.6505396 |             |             |             |             |
| KIAA1598    | KIAA1598    |             | 0           | 15.23386881 |
|             | 12.25580492 |             |             | 5.357134518 |
| AP0D        | AP0D        | 588.0283994 | 2685.223276 | 217.8568037 |
| 451.5792736 |             |             |             |             |
| KMT2B       | KMT2B       | 458.0061836 | 400.1429541 | 441.9635978 |
| 388.4147406 |             |             |             |             |
| FETUB       | FETUB       | 1.171371313 | 0           | 0           |
| MAP2K1      | MAP2K1      | 5115.378526 | 4037.990826 | 3680.351414 |

|             |             |             |             |             |             |
|-------------|-------------|-------------|-------------|-------------|-------------|
| 3527.786309 |             |             |             |             |             |
| TMEM106C    | TMEM106C    |             | 9277.260803 | 12148.50258 |             |
| 7069.631852 | 7509.980154 |             |             |             |             |
| SLC5A5      | SLC5A5      | 16.39919839 | 66.01343151 | 65.17846997 |             |
| 76.3630922  |             |             |             |             |             |
| ABLIM1      | ABLIM1      | 8747.800969 | 8815.332085 | 18698.18518 |             |
| 14175.25252 |             |             |             |             |             |
| RBX1        | RBX1        | 11855.44906 | 11631.56663 | 8527.665297 |             |
| 8692.193952 |             |             |             |             |             |
| VIPAS39     | VIPAS39     | 1468.899627 | 1554.87021  | 1254.462333 |             |
| 1493.322692 |             |             |             |             |             |
| STXBP1      | STXBP1      | 415.8368163 | 373.7375815 | 953.5699442 |             |
| 605.2482123 |             |             |             |             |             |
| PKM         | PKM         | 126248.0574 | 116776.7448 | 63485.61546 |             |
| 85933.93309 |             |             |             |             |             |
| FGFR10P     | FGFR10P     | 1591.893615 | 1705.177716 | 728.5702945 |             |
| 1243.492822 |             |             |             |             |             |
| RNF41       | RNF41       | 2708.210477 | 3013.259251 | 3275.887758 |             |
| 2868.801106 |             |             |             |             |             |
| CNNM3       | CNNM3       | 2554.760835 | 3065.054405 | 2855.352698 |             |
| 3018.699028 |             |             |             |             |             |
| ZNF75A      | ZNF75A      | 832.8450039 | 703.8047391 | 1403.569244 |             |
| 1293.458796 |             |             |             |             |             |
| FAM218A     | FAM218A     | 16.39919839 | 29.45214637 | 90.17843106 |             |
| 36.76741476 |             |             |             |             |             |
| LYG2        | LYG2        | 11.71371313 | 8.124730032 | 8.92855753  |             |
| 9.427542247 |             |             |             |             |             |
| HTRA4       | HTRA4       | 1.171371313 | 0           | 5.656525348 |             |
| CACNA2D2    | CACNA2D2    |             | 45.68348122 | 18.28064257 |             |
| 180.3568621 | 173.4667773 |             |             |             |             |
| CRCP        | CRCP        | 1263.909647 | 1458.389041 | 1715.175902 |             |
| 1352.852312 |             |             |             |             |             |
| TMEM11      | TMEM11      | 2819.490752 | 3597.224222 | 2858.924121 |             |
| 2493.584924 |             |             |             |             |             |
| EBF1        | EBF1        | 2.342742627 | 1.015591254 | 41.96422039 | 0           |
| TARBP2      | TARBP2      | 2131.895791 | 2661.864677 | 1817.854313 |             |
| 1987.325906 |             |             |             |             |             |
| LIMS3L      | LIMS3L      | 0           | 2.031182508 | 0.892855753 | 1.885508449 |
| E2F8        | E2F8        | 3216.585627 | 2512.572763 | 548.2134324 |             |
| 1057.77024  |             |             |             |             |             |
| EIF1AD      | EIF1AD      | 1748.857371 | 1644.24224  | 2590.17454  |             |
| 1482.009641 |             |             |             |             |             |
| ETS1        | ETS1        | 34595.28037 | 21598.5792  | 15374.97607 |             |
| 17572.93875 |             |             |             |             |             |
| AQP8        | AQP8        | 0           | 13.3928363  | 0.942754225 |             |
| TIMM23      | TIMM23      | 4657.372342 | 6417.521134 | 3647.315751 |             |
| 3927.5141   |             |             |             |             |             |
| TULP1       | TULP1       | 0           | 9.821413283 | 0           |             |
| TUFM        | TUFM        | 14934.98425 | 22880.25536 | 14803.54839 |             |
| 15060.49874 |             |             |             |             |             |

|               |               |             |             |             |
|---------------|---------------|-------------|-------------|-------------|
| SGTA          | SGTA          | 6212.953447 | 8560.41868  | 6149.990427 |
| 4760.908835   |               |             |             |             |
| RPL35A        | RPL35A        | 10025.76707 | 9302.815887 | 10553.555   |
| 10562.61833   |               |             |             |             |
| ACVR1         | ACVR1         | 1426.73026  | 1533.542794 | 1488.39054  |
| 1237.836297   |               |             |             |             |
| CDK9          | CDK9          | 5422.27781  | 6705.94905  | 5716.955387 |
| 5404.80997    |               |             |             |             |
| COL6A1        | COL6A1        | 248.3307185 | 620.5262562 | 235.7139188 |
| 356.3610969   |               |             |             |             |
| ANKFY1        | ANKFY1        | 5477.332262 | 4297.982187 | 4376.778901 |
| 4658.148624   |               |             |             |             |
| TBC1D7        | TBC1D7        | 2364.998682 | 2203.833021 | 825.8915716 |
| 1210.496425   |               |             |             |             |
| ERAP2         | ERAP2         | 10598.56764 | 21698.10714 | 29935.66769 |
| 18358.25302   |               |             |             |             |
| TRIM14        | TRIM14        | 7807.189804 | 9598.352942 | 9535.699442 |
| 8216.103068   |               |             |             |             |
| BDP1          | BDP1          | 2060.44214  | 1782.362651 | 2165.175201 |
| 2628.398779   |               |             |             |             |
| TMEM126B      | TMEM126B      |             | 2627.385856 | 2260.706132 |
| 2626.781625   | 2919.709834   |             |             |             |
| LRRD1         | LRRD1         | 0           | 2.031182508 | 0           |
| ZNF559-ZNF177 | ZNF559-ZNF177 |             | 119.479874  | 108.6682642 |
| 641.9632864   | 330.9067329   |             |             |             |
| PTPRF         | PTPRF         | 55.05445173 | 4.062365016 | 17.85711506 |
| 5.656525348   |               |             |             |             |
| GNRH1         | GNRH1         | 18.74194102 | 4.062365016 | 42.85707615 |
| 36.76741476   |               |             |             |             |
| EIF4G3        | EIF4G3        | 3391.119952 | 3072.163544 | 1199.105276 |
| 2347.45802    |               |             |             |             |
| PEX13         | PEX13         | 1347.07701  | 1491.903552 | 1362.497879 |
| 1297.229813   |               |             |             |             |
| SLC22A18      | SLC22A18      |             | 301.0424276 | 224.4456671 |
| 164.2854586   | 302.6241061   |             |             |             |
| NEMF          | NEMF          | 3076.021069 | 3011.228068 | 3249.994941 |
| 3497.618174   |               |             |             |             |
| MTAP          | MTAP          | 2133.067162 | 3422.542526 | 1949.104109 |
| 2316.34713    |               |             |             |             |
| MIR6889       | MIR6889       | 5.856856567 | 1.015591254 | 3.571423012 |
| 7.542033798   |               |             |             |             |
| TMEM57        | TMEM57        | 776.6191808 | 587.0117448 | 974.9984823 |
| 642.9583813   |               |             |             |             |
| CSTL1         | CSTL1         | 0           | 0           | 7.142846024 |
| LOC283194     | LOC283194     |             | 0           | 0           |
| LOC729970     | LOC729970     |             | 9.370970508 | 3.046773762 |
| 31.24995136   | 3.771016899   |             |             |             |
| OR2L13        | OR2L13        | 0           | 0           | 16.96957604 |
| REPIN1        | REPIN1        | 2726.952418 | 2743.111977 | 3317.851978 |
| 2869.74386    |               |             |             |             |

|             |             |             |             |               |
|-------------|-------------|-------------|-------------|---------------|
| AKAP8L      | AKAP8L      | 3997.890293 | 4956.08532  | 6568.739775   |
| 5599.017341 |             |             |             |               |
| QTRTD1      | QTRTD1      | 1598.921843 | 2153.053459 | 2125.889548   |
| 1941.130949 |             |             |             |               |
| LSM3        | LSM3        | 6881.806467 | 6436.817368 | 4485.707303   |
| 5319.019336 |             |             |             |               |
| MUS81       | MUS81       | 3832.726938 | 3769.874735 | 2508.03181    |
| 3185.566525 |             |             |             |               |
| HSPB6       | HSPB6       | 3.51411394  | 1.015591254 | 0 4.713771124 |
| ACPT        | ACPT        | 17.5705697  | 20.31182508 | 29.46423985   |
| 19.79783872 |             |             |             |               |
| CLPP        | CLPP        | 6519.852731 | 8584.79287  | 4911.599497   |
| 5111.613406 |             |             |             |               |
| MAT2A       | MAT2A       | 16762.3235  | 14962.70595 | 14009.79962   |
| 17737.92074 |             |             |             |               |
| ZDHC11      | ZDHC11      | 25.7701689  | 9.140321286 | 23.21424958   |
| 17.91233027 |             |             |             |               |
| GSTK1       | GSTK1       | 10420.5192  | 9005.24765  | 9279.449841   |
| 10625.78287 |             |             |             |               |
| C22orf46    | C22orf46    |             | 419.3509302 | 305.6929675   |
| 507.1420677 | 546.7974503 |             |             |               |
| FBX015      | FBX015      | 35.1411394  | 28.43655511 | 149.9997665   |
| 143.2986422 |             |             |             |               |
| TBC1D5      | TBC1D5      | 3039.708558 | 1985.480902 | 1424.997782   |
| 2491.699416 |             |             |             |               |
| BACH1       | BACH1       | 1290.851187 | 1060.277269 | 2544.638896   |
| 2098.570904 |             |             |             |               |
| IL2RA       | IL2RA       | 39239.76763 | 79592.90217 | 28268.706     |
| 38146.66419 |             |             |             |               |
| GSPT1       | GSPT1       | 14221.61912 | 18329.39095 | 13336.58638   |
| 13691.61961 |             |             |             |               |
| EPHX4       | EPHX4       | 24.59879758 | 12.18709505 | 8.035701777   |
| 11.3130507  |             |             |             |               |
| CHPF2       | CHPF2       | 4116.198796 | 3609.411317 | 3490.173139   |
| 3072.436018 |             |             |             |               |
| C3orf58     | C3orf58     | 1142.087031 | 809.4262295 | 1155.355344   |
| 1047.399944 |             |             |             |               |
| PALM2-AKAP2 | PALM2-AKAP2 |             | 6625.276149 | 5006.864882   |
| 4267.850499 | 5035.250314 |             |             |               |
| METTL14     | METTL14     | 1740.657772 | 1797.59652  | 2870.531246   |
| 2710.418396 |             |             |             |               |
| AN08        | AN08        | 144.0786716 | 6.093547524 | 10.71426904   |
| 115.0160154 |             |             |             |               |
| ZNF704      | ZNF704      | 15.22782708 | 8.124730032 | 25.89281684   |
| 40.53843166 |             |             |             |               |
| ZNF404      | ZNF404      | 12.88508445 | 14.21827756 | 56.24991244   |
| 48.08046546 |             |             |             |               |
| NOP2        | NOP2        | 6923.975834 | 9597.337351 | 10017.84155   |
| 9137.173946 |             |             |             |               |
| ZMAT3       | ZMAT3       | 1019.093043 | 788.0988131 | 2651.781587   |

|             |          |             |             |             |             |
|-------------|----------|-------------|-------------|-------------|-------------|
| 973.8651141 |          |             |             |             |             |
| TMX1        | TMX1     | 8508.841221 | 8735.100376 | 5946.419315 |             |
| 6609.649869 |          |             |             |             |             |
| WNT3        | WNT3     | 1.171371313 | 0           | 8.92855753  | 3.771016899 |
| WWOX        | WWOX     | 493.147323  | 692.6332353 | 481.2492509 |             |
| 637.3018559 |          |             |             |             |             |
| PTP4A1      | PTP4A1   | 12368.5097  | 15681.74455 | 15076.76225 |             |
| 11234.8021  |          |             |             |             |             |
| DNALI1      | DNALI1   | 124.1653592 | 175.697287  | 97.32127708 |             |
| 135.7566084 |          |             |             |             |             |
| CDK11B      | CDK11B   | 1450.157686 | 1193.319724 | 1762.497256 |             |
| 1318.91316  |          |             |             |             |             |
| DPYSL3      | DPYSL3   | 8.199599194 | 3.046773762 | 1.785711506 | 0           |
| DPYSL2      | DPYSL2   | 3880.753161 | 3844.012897 | 1249.998054 |             |
| 1891.164975 |          |             |             |             |             |
| NEDD1       | NEDD1    | 5444.533865 | 5165.297118 | 4839.278181 |             |
| 5968.576997 |          |             |             |             |             |
| PHOSPH01    | PHOSPH01 |             | 44.51210991 | 28.43655511 |             |
| 16.96425931 |          |             |             |             |             |
| CEACAM21    | CEACAM21 |             | 1310.7645   | 1565.026122 |             |
| 2078.568193 |          |             |             |             |             |
| DDX17       | DDX17    | 2352.113597 | 1089.729416 | 2333.032083 |             |
| 3074.321527 |          |             |             |             |             |
| YPEL5       | YPEL5    | 3125.218664 | 3056.929675 | 8673.200785 |             |
| 5912.011743 |          |             |             |             |             |
| LANCL1      | LANCL1   | 4594.118291 | 3549.491433 | 2540.174617 |             |
| 4191.485283 |          |             |             |             |             |
| ZNF397      | ZNF397   | 304.5565415 | 237.6483534 | 840.1772636 |             |
| 838.1085058 |          |             |             |             |             |
| RBM28       | RBM28    | 1746.514628 | 2255.628175 | 1749.10442  |             |
| 1739.381545 |          |             |             |             |             |
| HIGD2B      | HIGD2B   | 0           | 4.062365016 | 5.357134518 | 9.427542247 |
| NPIPA7      | NPIPA7   | 0           | 0           | 0.892855753 | 2.828262674 |
| TMEM163     | TMEM163  | 12.88508445 | 10.15591254 | 4.464278765 |             |
| 5.656525348 |          |             |             |             |             |
| BTBD11      | BTBD11   | 2072.155854 | 1559.948166 | 2177.675182 |             |
| 2315.404376 |          |             |             |             |             |
| LTBP1       | LTBP1    | 50.36896648 | 14.21827756 | 0           | 8.484788022 |
| DID01       | DID01    | 4760.453018 | 3711.986034 | 4882.135258 |             |
| 4716.599386 |          |             |             |             |             |
| NDUFA11     | NDUFA11  | 6134.471569 | 6811.570541 | 4345.52895  |             |
| 4364.009306 |          |             |             |             |             |
| CEBPG       | CEBPG    | 3126.390036 | 3541.366703 | 4900.885228 |             |
| 4119.835962 |          |             |             |             |             |
| E2F6        | E2F6     | 1023.778528 | 1067.386408 | 1066.069769 |             |
| 981.4071479 |          |             |             |             |             |
| NXPE4       | NXPE4    | 1.171371313 | 2.031182508 | 0           | 0           |
| PHYHD1      | PHYHD1   | 7.028227881 | 7.109138778 | 16.07140355 |             |
| 8.484788022 |          |             |             |             |             |
| METTL15     | METTL15  | 988.6373886 | 1029.809532 | 856.2486672 |             |



|                 |              |               |             |  |
|-----------------|--------------|---------------|-------------|--|
| 917.2998606     |              |               |             |  |
| IKBKG IKBKG     | 1643.433953  | 1770.175556   | 1411.604946 |  |
| 1316.084898     |              |               |             |  |
| LARS2 LARS2     | 3145.131977  | 2921.856038   | 1721.425892 |  |
| 2251.297089     |              |               |             |  |
| ESYT2 ESYT2     | 12506.73151  | 10762.22052   | 8523.201018 |  |
| 10726.65757     |              |               |             |  |
| ZNF490 ZNF490   | 1026.121271  | 1135.431022   | 887.4986185 |  |
| 943.6969789     |              |               |             |  |
| MAU2 MAU2       | 4345.787573  | 5352.165909   | 5724.991088 |  |
| 4755.252309     |              |               |             |  |
| NCSTN NCSTN     | 6949.746003  | 7420.925293   | 6441.061402 |  |
| 6810.456519     |              |               |             |  |
| EPT1 EPT1       | 2390.768851  | 1478.700866   | 1202.676699 |  |
| 1522.548073     |              |               |             |  |
| EDAR EDAR       | 10.54234182  | 0 408.0350791 | 390.300249  |  |
| STRA13 STRA13   | 2497.36364   | 3726.204311   | 2312.4964   |  |
| 2051.433193     |              |               |             |  |
| WEE2 WEE2       | 1.171371313  | 5.07795627    | 7.142846024 |  |
| 5.656525348     |              |               |             |  |
| C1orf177        | C1orf177     | 30.45565415   | 21.32741634 |  |
| 13.3928363      | 0            |               |             |  |
| MEF2BNB MEF2BNB | 928.8974516  | 885.5955735   | 671.4275263 |  |
| 710.8366854     |              |               |             |  |
| TPGS2 TPGS2     | 7966.496303  | 8103.402616   | 3175.887914 |  |
| 4392.291933     |              |               |             |  |
| VIPR1 VIPR1     | 104.2520469  | 69.06020528   | 622.3204599 |  |
| 496.8314764     |              |               |             |  |
| TRIM22 TRIM22   | 7859.901513  | 8905.719707   | 54479.37948 |  |
| 34075.85145     |              |               |             |  |
| ARHGAP8 ARHGAP8 | 7.028227881  | 2.031182508   | 84.82129654 |  |
| 15.0840676      |              |               |             |  |
| TNFRSF10D       | TNFRSF10D    | 131.1935871   | 183.822017  |  |
| 1644.640297     | 322.4219449  |               |             |  |
| TP53INP2        | TP53INP2     | 541.1735468   | 231.5548059 |  |
| 124.1069497     | 240.4023273  |               |             |  |
| CCL22 CCL22     | 69.11090749  | 563.653146    | 8890.164733 |  |
| 1791.233027     |              |               |             |  |
| GPANK1 GPANK1   | 1.171371313  | 1.015591254   | 0.892855753 |  |
| 0.942754225     |              |               |             |  |
| ST3GAL5 ST3GAL5 | 752.0203832  | 587.0117448   | 788.3916299 |  |
| 1084.167358     |              |               |             |  |
| MAFG-AS1        | MAFG-AS1     | 37.48388203   | 39.60805891 |  |
| 35.71423012     | 53.73699081  |               |             |  |
| NOP14-AS1       | NOP14-AS1    | 1629.377497   | 1756.97287  |  |
| 2207.139421     | 2169.277471  |               |             |  |
| RNF216P1        | RNF216P1     | 1041.349098   | 1211.600366 |  |
| 1420.533503     | 1664.903961  |               |             |  |
| LOC100129534    | LOC100129534 | 2.342742627   | 5.07795627  |  |
| 31.24995136     | 17.91233027  |               |             |  |

|                 |             |             |             |             |   |
|-----------------|-------------|-------------|-------------|-------------|---|
| LINC00461       | LINC00461   | 0           | 0           | 3.571423012 | 0 |
| LOC148413       | LOC148413   | 2442.309189 |             | 2667.958224 |   |
| 2770.531402     | 2412.508061 |             |             |             |   |
| LINC-PINT       | LINC-PINT   | 897.2704261 |             | 955.6713701 |   |
| 2894.638351     | 1697.900359 |             |             |             |   |
| ZMIZ1-AS1       | ZMIZ1-AS1   | 9.370970508 |             | 4.062365016 |   |
| 28.5713841      | 12.25580492 |             |             |             |   |
| LINC00094       | LINC00094   | 1343.562897 |             | 1129.337475 |   |
| 1749.997276     | 1437.700193 |             |             |             |   |
| ANKRD36BP2      | ANKRD36BP2  | 12.88508445 |             | 23.35859884 |   |
| 97.32127708     | 73.53482953 |             |             |             |   |
| LINC00426       | LINC00426   | 493.147323  |             | 420.4547792 |   |
| 287.4995525     | 235.6885562 |             |             |             |   |
| LINC00908       | LINC00908   | 0           | 0           | 0.892855753 |   |
| 3.771016899     |             |             |             |             |   |
| HSD17B14        | HSD17B14    | 10.54234182 |             | 19.29623383 |   |
| 64.28561422     | 21.68334717 |             |             |             |   |
| YTHDF1 YTHDF1   | 5218.459201 | 5776.683053 |             | 6337.490135 |   |
| 5642.384035     |             |             |             |             |   |
| BTBD2 BTBD2     | 463.8630401 | 334.1295226 |             | 334.8209074 |   |
| 425.1821553     |             |             |             |             |   |
| PAK4 PAK4       | 263.5585455 | 108.6682642 |             | 124.9998054 |   |
| 108.4167358     |             |             |             |             |   |
| MTERF2 MTERF2   | 325.6412251 | 328.0359751 |             | 303.570956  |   |
| 401.6132997     |             |             |             |             |   |
| CCDC66 CCDC66   | 892.5849409 | 978.0143777 |             | 1928.568427 |   |
| 1449.955998     |             |             |             |             |   |
| C10TNF9B        | C10TNF9B    | 23.42742627 |             | 27.42096386 |   |
| 13.3928363      | 29.22538097 |             |             |             |   |
| ESR1 ESR1       | 60.9113083  | 25.38978135 |             | 58.9284797  |   |
| 82.96237177     |             |             |             |             |   |
| DEPDC1B DEPDC1B | 3936.978985 | 3528.164017 |             | 907.1414451 |   |
| 1645.106122     |             |             |             |             |   |
| TNIK TNIK       | 1963.218321 | 1081.604686 |             | 1263.390891 |   |
| 1058.712994     |             |             |             |             |   |
| LSM7 LSM7       | 3095.934381 | 3810.498385 |             | 2169.63948  |   |
| 2008.066499     |             |             |             |             |   |
| ENPP4 ENPP4     | 1266.25239  | 1065.355226 |             | 1207.140978 |   |
| 1479.181379     |             |             |             |             |   |
| APOBEC1 APOBEC1 | 0           | 0           | 3.571423012 | 0           |   |
| GPALPP1 GPALPP1 | 1014.407557 | 1027.778349 |             | 881.2486282 |   |
| 933.3266825     |             |             |             |             |   |
| EVI2B EVI2B     | 2197.492584 | 1655.413744 |             | 2378.567726 |   |
| 2422.878358     |             |             |             |             |   |
| STRADB STRADB   | 1731.286801 | 3206.221589 |             | 2338.389217 |   |
| 2074.059294     |             |             |             |             |   |
| NARS NARS       | 9068.756709 | 11330.95162 |             | 11386.58942 |   |
| 12740.38059     |             |             |             |             |   |
| MAST3 MAST3     | 1439.615344 | 551.4660509 |             | 1372.319292 |   |
| 1871.367136     |             |             |             |             |   |

|             |           |             |             |             |             |
|-------------|-----------|-------------|-------------|-------------|-------------|
| ATP2A1      | ATP2A1    | 56.22582305 | 69.06020528 | 66.96418148 |             |
| 37.71016899 |           |             |             |             |             |
| ASCL1       | ASCL1     | 3.51411394  | 0           | 0           | 17.91233027 |
| ARRB2       | ARRB2     | 3797.585798 | 2166.256145 | 887.4986185 |             |
| 1131.30507  |           |             |             |             |             |
| FBX032      | FBX032    | 869.1575146 | 519.9827221 | 1528.569049 |             |
| 1558.372733 |           |             |             |             |             |
| IL1RL1      | IL1RL1    | 0           | 77.18493531 | 0           | 16.96957604 |
| DEFB113     | DEFB113   | 0           | 0           | 0.942754225 |             |
| ATXN7       | ATXN7     | 1636.405725 | 921.1412674 | 2131.246682 |             |
| 2226.785479 |           |             |             |             |             |
| APOH        | APOH      | 0           | 0           | 5.357134518 | 1.885508449 |
| SLAMF6      | SLAMF6    | 5554.642768 | 3940.494066 | 4709.814097 |             |
| 5868.645049 |           |             |             |             |             |
| SCARF1      | SCARF1    | 10.54234182 | 22.34300759 | 73.21417175 |             |
| 16.96957604 |           |             |             |             |             |
| HHLA2       | HHLA2     | 12.88508445 | 24.3741901  | 28.5713841  |             |
| 16.96957604 |           |             |             |             |             |
| HPS3        | HPS3      | 2998.710562 | 3697.767756 | 3149.995097 |             |
| 3404.285505 |           |             |             |             |             |
| FPGS        | FPGS      | 5251.257598 | 6518.064668 | 4113.386454 |             |
| 4001.04893  |           |             |             |             |             |
| DPRX        | DPRX      | 0           | 0           | 7.142846024 | 0           |
| HRH1        | HRH1      | 10.54234182 | 11.17150379 | 0           | 88.61889712 |
| RUFY1       | RUFY1     | 2443.48056  | 2596.866837 | 2322.317814 |             |
| 2360.656579 |           |             |             |             |             |
| ARTN        | ARTN      | 0           | 3.046773762 | 0           | 0           |
| CTSC        | CTSC      | 19014.87053 | 23545.46763 | 7116.060352 |             |
| 10821.87575 |           |             |             |             |             |
| SLC25A25    | SLC25A25  |             | 1436.10123  | 1199.413271 |             |
| 1431.247772 | 839.05126 |             |             |             |             |
| MLH1        | MLH1      | 6556.165241 | 7283.820474 | 4397.314584 |             |
| 5393.49692  |           |             |             |             |             |
| SLC39A9     | SLC39A9   | 4085.743141 | 3446.916716 | 3900.886785 |             |
| 3886.975669 |           |             |             |             |             |
| INAFM2      | INAFM2    | 286.9859718 | 387.955859  | 563.3919802 |             |
| 391.2430033 |           |             |             |             |             |
| LOC283710   | LOC283710 |             | 1.171371313 | 0           | 0           |
| SLC29A2     | SLC29A2   | 69.11090749 | 86.32525659 | 507.1420677 | 0           |
| 336.5632582 |           |             |             |             |             |
| SLC27A1     | SLC27A1   | 161.6492413 | 132.026863  | 448.213588  |             |
| 328.0784702 |           |             |             |             |             |
| LRRK2       | LRRK2     | 7.028227881 | 0           | 6.249990271 | 6.599279573 |
| ALAS1       | ALAS1     | 6266.836527 | 10137.6319  | 5525.884256 |             |
| 5681.036958 |           |             |             |             |             |
| PSMC2       | PSMC2     | 14872.90157 | 20623.6116  | 11782.12452 |             |
| 12297.28611 |           |             |             |             |             |
| GTF3C1      | GTF3C1    | 6455.427308 | 4523.443446 | 3140.173683 |             |
| 4097.209861 |           |             |             |             |             |
| ETFA        | ETFA      | 7558.859086 | 9466.326079 | 5934.81219  |             |

|                 |              |  |             |             |
|-----------------|--------------|--|-------------|-------------|
| 6466.351227     |              |  |             |             |
| BIVM-ERCC5      | BIVM-ERCC5   |  | 4595.289663 | 4616.877841 |
| 5397.313027     | 5305.820777  |  |             |             |
| GUK1 GUK1       | 12119.00761  |  | 18263.37752 | 14400.87044 |
| 11172.58032     |              |  |             |             |
| FFAR3 FFAR3     | 0 0          |  | 24.10710533 | 42.42394011 |
| THRAP3 THRAP3   | 12506.73151  |  | 14802.24253 | 13222.30085 |
| 13686.90583     |              |  |             |             |
| HOXC4 HOXC4     | 0 0          |  | 0.892855753 | 1.885508449 |
| ARFGAP3 ARFGAP3 | 2324.000686  |  | 2640.537261 | 3050.888108 |
| 2903.683012     |              |  |             |             |
| PDPR PDPR       | 2578.188261  |  | 1100.900919 | 1698.211642 |
| 2039.177388     |              |  |             |             |
| SNX10 SNX10     | 3132.246892  |  | 5296.30839  | 2247.31793  |
| 2355.000053     |              |  |             |             |
| TTC18 TTC18     | 60.9113083   |  | 77.18493531 | 122.3212382 |
| 162.1537267     |              |  |             |             |
| SPAG5-AS1       | SPAG5-AS1    |  | 1164.343086 | 684.5085052 |
| 781.2487839     | 855.0780818  |  |             |             |
| CHST7 CHST7     | 823.4740334  |  | 1074.495547 | 415.1779252 |
| 596.7634242     |              |  |             |             |
| WSB1 WSB1       | 5177.461205  |  | 5352.165909 | 7472.309797 |
| 6829.311604     |              |  |             |             |
| BHLHB9 BHLHB9   | 192.1048954  |  | 124.9177242 | 182.1425736 |
| 209.2914379     |              |  |             |             |
| GGACT GGACT     | 227.2460348  |  | 255.928996  | 194.6425542 |
| 253.6008864     |              |  |             |             |
| PNPT1 PNPT1     | 5177.461205  |  | 6134.171174 | 4844.635316 |
| 5815.850812     |              |  |             |             |
| DAZAP2 DAZAP2   | 28280.41762  |  | 32432.9067  | 37007.97811 |
| 31249.47429     |              |  |             |             |
| ATXN7L3B        | ATXN7L3B     |  | 4267.305695 | 3678.471522 |
| 5404.455873     | 5965.748734  |  |             |             |
| JHDM1D-AS1      | JHDM1D-AS1   |  | 521.2602345 | 257.9601785 |
| 324.9994941     | 290.3683012  |  |             |             |
| SNX30 SNX30     | 140.5645576  |  | 122.8865417 | 505.3563562 |
| 437.4379603     |              |  |             |             |
| ZKSCAN2 ZKSCAN2 | 226.0746635  |  | 201.0870683 | 110.7141134 |
| 199.8638956     |              |  |             |             |
| GGA1 GGA1       | 2492.678155  |  | 2363.280848 | 2351.782053 |
| 2252.239843     |              |  |             |             |
| FBX048 FBX048   | 295.185571   |  | 250.8510398 | 273.2138604 |
| 224.3755055     |              |  |             |             |
| LIN52 LIN52     | 1861.309017  |  | 2389.686221 | 1580.354683 |
| 1799.717815     |              |  |             |             |
| PLVAP PLVAP     | 0 0          |  | 2.678567259 | 0           |
| LOC101928489    | LOC101928489 |  | 89.02421982 | 64.99784026 |
| 7.142846024     | 48.08046546  |  |             |             |
| NOM02 NOM02     | 2165.865559  |  | 3417.46457  | 1949.996965 |
| 2072.173786     |              |  |             |             |

|              |              |             |             |             |             |
|--------------|--------------|-------------|-------------|-------------|-------------|
| KSR2         | KSR2         | 4.685485254 | 2.031182508 | 13.3928363  |             |
| 10.37029647  |              |             |             |             |             |
| ANKRD52      | ANKRD52      | 4519.150527 | 4004.476315 | 2172.318047 |             |
| 3029.069324  |              |             |             |             |             |
| B4GALNT3     | B4GALNT3     |             | 338.5263096 | 660.1343151 |             |
| 408.9279349  | 290.3683012  |             |             |             |             |
| LOC102724862 | LOC102724862 |             | 69.11090749 | 30.46773762 |             |
| 64.28561422  | 82.01961755  |             |             |             |             |
| BTBD17       | BTBD17       | 1.171371313 | 0           | 0           |             |
| C17orf98     | C17orf98     |             | 3.51411394  | 1.015591254 | 0           |
|              | 6.599279573  |             |             |             |             |
| NTRK2        | NTRK2        | 288.1573431 | 657.0875414 | 455.356434  |             |
| 303.5668604  |              |             |             |             |             |
| C1orf192     | C1orf192     |             | 9.370970508 | 10.15591254 |             |
| 29.46423985  | 16.02682182  |             |             |             |             |
| BCL2A1       | BCL2A1       | 591.5425133 | 479.3590719 | 1466.069146 |             |
| 1793.118535  |              |             |             |             |             |
| ADAMTS18     | ADAMTS18     |             | 1.171371313 | 0           | 0           |
| 2.828262674  |              |             |             |             |             |
| TNFRSF1B     | TNFRSF1B     |             | 77876.27903 | 133730.0096 |             |
| 26254.42342  | 35096.85428  |             |             |             |             |
| ISOC1        | ISOC1        | 2912.029085 | 3557.616163 | 2959.816821 |             |
| 3169.539703  |              |             |             |             |             |
| FAHD2A       | FAHD2A       | 1049.548697 | 1395.422383 | 721.4274484 |             |
| 983.2926564  |              |             |             |             |             |
| KCNN1        | KCNN1        | 3.51411394  | 0           | 0           | 0.942754225 |
| DRAP1        | DRAP1        | 4236.850041 | 5365.368595 | 5414.277286 |             |
| 4253.707062  |              |             |             |             |             |
| TNFRSF1A     | TNFRSF1A     |             | 1812.111422 | 1742.754592 |             |
| 1520.533347  | 1845.912772  |             |             |             |             |
| KIF21A       | KIF21A       | 679.3953618 | 507.795627  | 1053.569789 |             |
| 1005.918758  |              |             |             |             |             |
| ZNF358       | ZNF358       | 18.74194102 | 14.21827756 | 49.99992217 |             |
| 27.33987252  |              |             |             |             |             |
| NBPF14       | NBPF14       | 50.36896648 | 60.93547524 | 189.2854196 |             |
| 95.2181767   |              |             |             |             |             |
| ZSCAN30      | ZSCAN30      | 559.9154878 | 351.3945739 | 471.4278376 |             |
| 553.3967299  |              |             |             |             |             |
| TMED1        | TMED1        | 2047.557056 | 2544.056091 | 1824.104303 |             |
| 1439.585701  |              |             |             |             |             |
| TYR03P       | TYR03P       | 0           | 2.031182508 | 0           |             |
| OSTCP1       | OSTCP1       | 2.342742627 | 3.046773762 | 0           | 3.771016899 |
| RNF123       | RNF123       | 3619.537359 | 3640.894646 | 3250.887797 |             |
| 3348.663006  |              |             |             |             |             |
| HIST1H4J     | HIST1H4J     |             | 76.13913537 | 56.87311023 |             |
| 33.03566286  | 28.28262674  |             |             |             |             |
| RGS9         | RGS9         | 407.6372171 | 116.7929942 | 17.85711506 |             |
| 168.7530062  |              |             |             |             |             |
| ISG20        | ISG20        | 7121.937586 | 6328.149104 | 12622.30178 |             |
| 10101.61152  |              |             |             |             |             |

|             |          |             |             |             |
|-------------|----------|-------------|-------------|-------------|
| MAOA        | MAOA     | 2.342742627 | 7.109138778 | 92.85699832 |
| 18.85508449 |          |             |             |             |
| IL34        | IL34     | 0           | 0           | 1.885508449 |
| ILF2        | ILF2     | 22562.95424 | 29381.05498 | 21276.75259 |
| 21977.48649 |          |             |             |             |
| MEF2BNB     | MEF2B    | MEF2BNB     | MEF2B       | 540.0021755 |
| 516.0706253 |          | 492.1177053 |             | 570.7622848 |
| MED13       | MED13    | 1525.12545  | 603.2612049 | 1090.176874 |
| 1008.74702  |          |             |             |             |
| MCHR1       | MCHR1    | 0           | 2.031182508 | 0           |
| UQCRQ       | UQCRQ    | 9597.045171 | 9602.415307 | 5908.919374 |
| 6213.693095 |          |             |             |             |
| FNBP1       | FNBP1    | 7623.284508 | 6506.893165 | 7008.024806 |
| 7557.117865 |          |             |             |             |
| DHX9        | DHX9     | 21206.50626 | 22916.81665 | 18680.32806 |
| 19480.13055 |          |             |             |             |
| DLGAP5      | DLGAP5   | 8159.77257  | 8776.739618 | 1994.639752 |
| 4172.630199 |          |             |             |             |
| NEDD8       | NEDD8    | 8870.794957 | 11777.81177 | 8162.487294 |
| 7542.033798 |          |             |             |             |
| ACIN1       | ACIN1    | 4409.041624 | 2288.127095 | 2299.103564 |
| 2248.468826 |          |             |             |             |
| SMCHD1      | SMCHD1   | 14045.91342 | 8686.351996 | 15602.65428 |
| 14883.26095 |          |             |             |             |
| COPS6       | COPS6    | 7849.359171 | 10655.58344 | 6281.240223 |
| 7201.699523 |          |             |             |             |
| FRYL        | FRYL     | 4746.396562 | 1678.772343 | 1842.854274 |
| 2318.232639 |          |             |             |             |
| RRAGB       | RRAGB    | 371.3247064 | 350.3789826 | 623.2133156 |
| 470.4343581 |          |             |             |             |
| MIR25       | MIR25    | 31.62702546 | 20.31182508 | 41.96422039 |
| 39.59567744 |          |             |             |             |
| MIR24-2     | MIR24-2  | 1.171371313 | 2.031182508 | 3.571423012 |
| 3.771016899 |          |             |             |             |
| PAX2        | PAX2     | 0           | 0           | 0.942754225 |
| GTPBP2      | GTPBP2   | 913.6696245 | 532.1698171 | 409.8207906 |
| 556.2249926 |          |             |             |             |
| PEX2        | PEX2     | 3179.101745 | 4164.939733 | 3043.745262 |
| 3150.684619 |          |             |             |             |
| GPATCH11    | GPATCH11 |             | 1105.77452  | 1087.698233 |
| 1440.17633  |          | 1209.55367  |             |             |
| SIMC1       | SIMC1    | 1124.516461 | 1446.201946 | 894.6414645 |
| 1182.213798 |          |             |             |             |
| KANK1       | KANK1    | 209.6754651 | 1166.914351 | 2102.675298 |
| 326.1929618 |          |             |             |             |
| ADCK1       | ADCK1    | 363.1251072 | 403.1897279 | 401.7850889 |
| 465.720587  |          |             |             |             |
| EIF2S1      | EIF2S1   | 10163.98889 | 12431.85254 | 9916.055993 |
| 10297.7044  |          |             |             |             |
| MEX3D       | MEX3D    | 45.68348122 | 4.062365016 | 3.571423012 |

|                           |             |               |             |  |
|---------------------------|-------------|---------------|-------------|--|
| 2.828262674               |             |               |             |  |
| SH2D4A SH2D4A             | 159.3064986 | 290.4590987   | 169.6425931 |  |
| 92.38991402               |             |               |             |  |
| ACKR2 ACKR2               | 10.54234182 | 6.093547524   | 7.142846024 |  |
| 13.19855915               |             |               |             |  |
| CLDN3 CLDN3               | 1.171371313 | 0 0 0         |             |  |
| ALOX15B ALOX15B           | 0 0         | 0 5.656525348 |             |  |
| ALOX12B ALOX12B           | 28.11291152 | 18.28064257   | 133.928363  |  |
| 44.30944856               |             |               |             |  |
| ALOX5AP ALOX5AP           | 2951.85571  | 1778.300286   | 3204.459298 |  |
| 3925.628592               |             |               |             |  |
| NR4A3 NR4A3               | 330.3267104 | 242.7263097   | 294.6423985 |  |
| 243.23059                 |             |               |             |  |
| WDPCP WDPCP               | 173.3629544 | 170.6193307   | 371.4279933 |  |
| 205.520421                |             |               |             |  |
| FAM43A FAM43A             | 2510.248725 | 2248.519036   | 1152.676777 |  |
| 898.4447762               |             |               |             |  |
| TCTEX1D1 TCTEX1D1         |             | 0 0 0         | 2.828262674 |  |
| RALGPS2 RALGPS2           | 44.51210991 | 36.56128515   | 184.8211409 |  |
| 226.2610139               |             |               |             |  |
| SDHAF1 SDHAF1             | 1095.232178 | 1271.52025    | 1599.997509 |  |
| 1301.00083                |             |               |             |  |
| ZNF408 ZNF408             | 1103.431777 | 1264.411111   | 1620.533192 |  |
| 1308.542864               |             |               |             |  |
| C12orf49 C12orf49         |             | 2154.151845   | 2662.880268 |  |
| 2016.06829                | 1715.812689 |               |             |  |
| FBX031 FBX031             | 2170.551044 | 2766.470576   | 3919.636756 |  |
| 2998.901189               |             |               |             |  |
| KLHL36 KLHL36             | 1409.15969  | 877.4708435   | 2089.282462 |  |
| 1837.427984               |             |               |             |  |
| SNORD116-19 SNORD116-19   |             | 2.342742627   | 1.015591254 |  |
| 5.357134518               | 7.542033798 |               |             |  |
| LRRC28 LRRC28             | 1037.834984 | 1075.511138   | 521.4277598 |  |
| 803.2265995               |             |               |             |  |
| FAM215A FAM215A           | 7.028227881 | 27.42096386   | 54.46420093 |  |
| 47.13771124               |             |               |             |  |
| TRA2B TRA2B               | 13853.80852 | 12076.3956    | 9444.628156 |  |
| 11119.78608               |             |               |             |  |
| NDUFA5 NDUFA5             | 3445.003033 | 2903.575395   | 3622.31579  |  |
| 3803.070543               |             |               |             |  |
| BOLL BOLL                 | 2.342742627 | 5.07795627    | 4.464278765 |  |
| 3.771016899               |             |               |             |  |
| ID2-AS1 ID2-AS1           | 44.51210991 | 26.40537261   | 45.5356434  |  |
| 30.16813519               |             |               |             |  |
| PRKAR2A-AS1 PRKAR2A-AS1   |             | 38.65525334   | 16.24946006 |  |
| 44.64278765               | 94.27542247 |               |             |  |
| LOC100506476 LOC100506476 |             | 23.42742627   | 126.9489068 |  |
| 183.9282851               | 57.50800771 |               |             |  |
| LOC101928075 LOC101928075 |             | 0 2.031182508 | 8.92855753  |  |
| 0                         |             |               |             |  |

|                 |                 |               |               |
|-----------------|-----------------|---------------|---------------|
| LOC101927124    | LOC101927124    | 32.79839678   | 11.17150379   |
| 63.39275847     | 31.11088942     |               |               |
| SLC25A30        | SLC25A30        | 448.6352131   | 204.1338421   |
| 254.4638896     | 197.035633      |               |               |
| GOPC GOPC       | 2157.665959     | 2232.269576   | 2587.495972   |
| 3068.665001     |                 |               |               |
| DTNBP1 DTNBP1   | 1767.599312     | 1710.255672   | 1674.104537   |
| 1890.222221     |                 |               |               |
| FAM188B FAM188B | 72.62502143     | 69.06020528   | 39.28565313   |
| 93.33266825     |                 |               |               |
| SLC19A2 SLC19A2 | 489.633209      | 487.4838019   | 243.7496206   |
| 503.430756      |                 |               |               |
| CACNA1A CACNA1A | 23.42742627     | 52.81074521   | 43.7499319    |
| 44.30944856     |                 |               |               |
| TMEM109 TMEM109 | 9269.061203     | 11159.3167    | 9140.164344   |
| 8496.101073     |                 |               |               |
| RETNLB RETNLB   | 0 1.015591254 0 | 0             | 0             |
| KIAA1324        | KIAA1324        | 3070.164213   | 2885.294753   |
| 974.9984823     | 1514.063285     |               |               |
| AHNAK AHNAK     | 7280.072713     | 5209.983133   | 2932.138293   |
| 5765.884838     |                 |               |               |
| NUP37 NUP37     | 3799.928541     | 4837.261143   | 2167.853768   |
| 2430.420391     |                 |               |               |
| SMOX SMOX       | 354.925508      | 850.0498796   | 347.3208879   |
| 335.620504      |                 |               |               |
| SYTL5 SYTL5     | 2.342742627     | 3.046773762   | 16.96425931   |
| 13.19855915     |                 |               |               |
| FAM60A FAM60A   | 5518.330258     | 5955.427114   | 6195.52607    |
| 6857.594231     |                 |               |               |
| GLI1 GLI1       | 23.42742627     | 17.26505132   | 38.39279738   |
| 23.56885562     |                 |               |               |
| FGF22 FGF22     | 0 0             | 0 0.942754225 |               |
| RET RET         | 55.05445173     | 24.3741901    | 0 7.542033798 |
| HIST2H2AA4      | HIST2H2AA4      | 1.171371313   | 1.015591254   |
| 5.357134518     | 2.828262674     |               |               |
| GLB1L3 GLB1L3   | 148.7641568     | 86.32525659   | 72.321316     |
| 73.53482953     |                 |               |               |
| EIF3H EIF3H     | 6187.183278     | 7036.016208   | 6179.454667   |
| 5842.247931     |                 |               |               |
| CSGALNACT1      | CSGALNACT1      | 1938.619524   | 3832.841393   |
| 1483.033406     | 1265.17617      |               |               |
| TMEM255A        | TMEM255A        | 2.342742627   | 0 8.92855753  |
| 13.19855915     |                 |               |               |
| COR01B COR01B   | 1868.337245     | 3134.11461    | 1716.068757   |
| 1653.59091      |                 |               |               |
| LSM10 LSM10     | 2757.408072     | 4176.111237   | 3511.601677   |
| 2775.468438     |                 |               |               |
| CLUAP1 CLUAP1   | 891.4135695     | 929.2659975   | 2497.317541   |
| 1542.345912     |                 |               |               |
| MRPL55 MRPL55   | 2196.321213     | 3556.600572   | 3444.637495   |



|                 |              |             |             |             |             |
|-----------------|--------------|-------------|-------------|-------------|-------------|
| 2487.928399     |              |             |             |             |             |
| ASB14 ASB14     | 175.705697   | 163.5101919 | 198.2139772 |             |             |
| 223.4327513     |              |             |             |             |             |
| HIST1H3F        | HIST1H3F     | 94.88107639 | 67.02902277 |             |             |
| 12.49998054     | 15.0840676   |             |             |             |             |
| FAAH2 FAAH2     | 671.1957626  | 411.3144579 | 1607.140355 |             |             |
| 1868.538873     |              |             |             |             |             |
| FAM9C FAM9C     | 8.199599194  | 5.07795627  | 0           | 5.656525348 |             |
| NDUFAF2 NDUFAF2 | 565.7723444  | 698.7267828 | 651.7846997 |             |             |
| 633.530839      |              |             |             |             |             |
| PSORS1C2        | PSORS1C2     | 0           | 0           | 0           | 1.885508449 |
| MCTS2P MCTS2P   | 306.8992841  | 365.6128515 | 326.7852056 |             |             |
| 338.4487667     |              |             |             |             |             |
| LINC01480       | LINC01480    | 241.3024906 | 168.5881482 |             |             |
| 437.499319      | 251.715378   |             |             |             |             |
| LOC101927661    | LOC101927661 | 0           | 0           | 3.571423012 | 0           |
| LOC101929698    | LOC101929698 | 26.94154021 | 58.90429273 |             |             |
| 104.4641231     | 20.74059294  |             |             |             |             |
| EME1 EME1       | 2017.101402  | 1759.004052 | 1065.176913 |             |             |
| 1302.886339     |              |             |             |             |             |
| ABHD14A-ACY1    | ABHD14A-ACY1 | 1757.05697  | 2351.093753 |             |             |
| 1930.354138     | 2122.13976   |             |             |             |             |
| HERC2P2 HERC2P2 | 1078.83298   | 169.6037394 | 224.106794  |             |             |
| 768.3446931     |              |             |             |             |             |
| MIR29B1 MIR29B1 | 0            | 0           | 3.571423012 | 0.942754225 |             |
| MIR101-1        | MIR101-1     | 2.342742627 | 1.015591254 |             |             |
| 16.07140355     | 6.599279573  |             |             |             |             |
| ZNF667-AS1      | ZNF667-AS1   | 25.7701689  | 52.81074521 |             |             |
| 308.9280905     | 81.07686333  |             |             |             |             |
| G3BP1 G3BP1     | 23373.54319  | 25994.05815 | 22120.50128 |             |             |
| 23043.74151     |              |             |             |             |             |
| SSBP3 SSBP3     | 828.1595186  | 602.2456137 | 435.7136075 |             |             |
| 484.5756715     |              |             |             |             |             |
| ZMAT2 ZMAT2     | 2774.978642  | 2217.035708 | 2580.353126 |             |             |
| 2078.773066     |              |             |             |             |             |
| DCXR DCXR       | 3617.194616  | 4184.235967 | 3008.031032 |             |             |
| 2887.65619      |              |             |             |             |             |
| BPIFA3 BPIFA3   | 0            | 0           | 3.571423012 | 0           |             |
| LCORL LCORL     | 766.076839   | 873.4084785 | 872.3200707 |             |             |
| 823.9671924     |              |             |             |             |             |
| TMEM147 TMEM147 | 2711.724591  | 3110.756011 | 3675.887135 |             |             |
| 2976.275087     |              |             |             |             |             |
| RBM39 RBM39     | 11939.7878   | 11712.81393 | 15364.2618  |             |             |
| 15347.09602     |              |             |             |             |             |
| C4orf32 C4orf32 | 1314.278614  | 1435.030442 | 1699.104498 |             |             |
| 1661.132944     |              |             |             |             |             |
| DCLRE1A DCLRE1A | 3115.847694  | 2591.78888  | 1553.56901  |             |             |
| 2206.044886     |              |             |             |             |             |
| DNTT DNTT       | 0            | 0           | 33.03566286 | 0           |             |
| CELF1 CELF1     | 8911.792953  | 8969.701956 | 9790.163332 |             |             |

|                 |              |  |               |             |
|-----------------|--------------|--|---------------|-------------|
| 9310.640723     |              |  |               |             |
| ZRANB2-AS1      | ZRANB2-AS1   |  | 726.2502143   | 792.1611782 |
| 767.8559476     | 853.1925734  |  |               |             |
| CLN5 CLN5       | 1151.458001  |  | 1290.816484   | 2366.067746 |
| 2080.658574     |              |  |               |             |
| LOC440896       | LOC440896    |  | 0 0           | 5.357134518 |
| 25.45436407     |              |  |               |             |
| RPL32P3 RPL32P3 | 217.8750643  |  | 121.8709505   | 353.5708782 |
| 293.1965639     |              |  |               |             |
| CCT6P1 CCT6P1   | 210.8468364  |  | 160.4634181   | 549.9991439 |
| 477.0336377     |              |  |               |             |
| LOC100289361    | LOC100289361 |  | 26.94154021   | 43.67042392 |
| 66.07132572     | 15.0840676   |  |               |             |
| SDC4 SDC4       | 3952.206812  |  | 2176.412057   | 1317.855091 |
| 2522.810305     |              |  |               |             |
| COL8A1 COL8A1   | 1.171371313  |  | 0 0           | 0           |
| ATR ATR         | 2581.702375  |  | 1573.150853   | 1821.425736 |
| 2149.479632     |              |  |               |             |
| GNB4 GNB4       | 889.0708269  |  | 534.2009996   | 213.392525  |
| 207.4059294     |              |  |               |             |
| US01 US01       | 6724.842711  |  | 5376.540099   | 5191.063348 |
| 6329.651865     |              |  |               |             |
| NR1H3 NR1H3     | 643.0828511  |  | 585.9961536   | 533.0348846 |
| 490.2321969     |              |  |               |             |
| FANCM FANCM     | 1404.474205  |  | 1004.41975    | 827.6772831 |
| 909.7578268     |              |  |               |             |
| ABR ABR         | 3852.64025   |  | 2729.909291   | 1550.890443 |
| 2765.098141     |              |  |               |             |
| LOC101927599    | LOC101927599 |  | 100.737933    | 101.5591254 |
| 85.71415229     | 104.6457189  |  |               |             |
| KRT81 KRT81     | 0 13.2026863 |  | 0             | 0           |
| TRDMT1 TRDMT1   | 528.2884624  |  | 591.0741099   | 484.8206739 |
| 436.495206      |              |  |               |             |
| C5AR1 C5AR1     | 0 0          |  | 1.785711506   | 3.771016899 |
| STARD7 STARD7   | 27794.29853  |  | 33305.29959   | 23306.21372 |
| 25848.43533     |              |  |               |             |
| ETS2 ETS2       | 3247.041281  |  | 4112.128988   | 2934.81686  |
| 3289.26949      |              |  |               |             |
| POLR3C POLR3C   | 2978.79725   |  | 3724.173129   | 4473.207323 |
| 3552.297919     |              |  |               |             |
| ZNF181 ZNF181   | 291.6714571  |  | 279.2875949   | 1384.819273 |
| 1366.993626     |              |  |               |             |
| WDR62 WDR62     | 2628.557227  |  | 2093.133575   | 868.7486477 |
| 1056.827486     |              |  |               |             |
| FERMT3 FERMT3   | 20588.02221  |  | 30356.02258   | 13841.04988 |
| 16857.38829     |              |  |               |             |
| SNX29P1 SNX29P1 | 0 0          |  | 2.678567259   | 1.885508449 |
| TRIM16L TRIM16L | 26.94154021  |  | 55.85751897   | 18.74997081 |
| 13.19855915     |              |  |               |             |
| ABCA9 ABCA9     | 0 0          |  | 0 2.828262674 |             |

|             |         |             |             |             |             |
|-------------|---------|-------------|-------------|-------------|-------------|
| FEZ1        | FEZ1    | 35.1411394  | 59.91988399 | 48.21421066 |             |
| 128.2145746 |         |             |             |             |             |
| ABCA10      | ABCA10  | 0           | 1.015591254 | 4.464278765 | 6.599279573 |
| LY9         | LY9     | 353.7541367 | 86.32525659 | 4682.135569 |             |
| 3688.997281 |         |             |             |             |             |
| TFPI        | TFPI    | 62.08267961 | 39.60805891 | 0           | 0           |
| SCARA3      | SCARA3  | 0           | 5.07795627  | 0           | 0           |
| GSDMA       | GSDMA   | 70.28227881 | 108.6682642 | 46.42849916 |             |
| 79.19135488 |         |             |             |             |             |
| MAPK7       | MAPK7   | 722.7361004 | 652.0095851 | 683.0346511 |             |
| 526.0568574 |         |             |             |             |             |
| ATRN        | ATRN    | 987.4660172 | 655.0563589 | 519.6420483 |             |
| 577.9083398 |         |             |             |             |             |
| FUT8        | FUT8    | 7134.82267  | 8088.168747 | 2095.532452 |             |
| 3395.800717 |         |             |             |             |             |
| KLHL8       | KLHL8   | 1467.728256 | 1405.578296 | 1749.10442  |             |
| 1350.966804 |         |             |             |             |             |
| NOG         | NOG     | 8.199599194 | 5.07795627  | 109.8212576 |             |
| 38.65292321 |         |             |             |             |             |
| ATAD3A      | ATAD3A  | 3946.349955 | 5265.840652 | 2641.960173 |             |
| 2763.212633 |         |             |             |             |             |
| HORMAD1     | HORMAD1 | 0           | 0           | 20.53568232 | 0           |
| KCNQ2       | KCNQ2   | 0           | 0           | 5.357134518 | 1.885508449 |
| F5          | F5      | 5835.771884 | 4101.973075 | 1342.855053 |             |
| 4256.535325 |         |             |             |             |             |
| TMEM50B     | TMEM50B | 2315.801087 | 2370.389987 | 4789.278259 |             |
| 3590.950842 |         |             |             |             |             |
| BIN3        | BIN3    | 2510.248725 | 3425.5893   | 2256.246488 |             |
| 2188.132556 |         |             |             |             |             |
| CMAS        | CMAS    | 3992.033436 | 5144.985293 | 3502.673119 |             |
| 3698.424824 |         |             |             |             |             |
| METTL18     | METTL18 | 910.1555106 | 656.0719501 | 1235.712362 |             |
| 1564.972013 |         |             |             |             |             |
| ZNF622      | ZNF622  | 3252.898137 | 5032.254664 | 4538.385793 |             |
| 3670.142197 |         |             |             |             |             |
| EPHB1       | EPHB1   | 113.6230174 | 96.48116913 | 0           | 32.05364364 |
| MPRIP       | MPRIP   | 3134.589635 | 3009.196886 | 1937.496984 |             |
| 2193.789081 |         |             |             |             |             |
| ITGB5       | ITGB5   | 25.7701689  | 12.18709505 | 106.2498346 |             |
| 63.16453306 |         |             |             |             |             |
| GGT1        | GGT1    | 4147.825821 | 6821.726453 | 1298.212265 |             |
| 2252.239843 |         |             |             |             |             |
| NUP43       | NUP43   | 2080.355453 | 1058.246087 | 1008.927001 |             |
| 1346.253033 |         |             |             |             |             |
| SETD9       | SETD9   | 467.3771541 | 440.7666043 | 571.4276819 |             |
| 456.2930448 |         |             |             |             |             |
| WDR36       | WDR36   | 5518.330258 | 4909.368122 | 5116.063465 |             |
| 5930.866828 |         |             |             |             |             |
| CELA2A      | CELA2A  | 3.51411394  | 2.031182508 | 0           | 2.828262674 |
| SLC47A2     | SLC47A2 | 4.685485254 | 0           | 1.785711506 | 0           |

|             |          |             |             |             |
|-------------|----------|-------------|-------------|-------------|
| SNX21       | SNX21    | 630.1977666 | 705.8359216 | 475.8921164 |
| 483.6329173 |          |             |             |             |
| UHRF2       | UHRF2    | 2812.462524 | 2289.142687 | 2091.068174 |
| 2856.545301 |          |             |             |             |
| FNIP2       | FNIP2    | 1067.119267 | 1270.504659 | 1562.497568 |
| 1224.637738 |          |             |             |             |
| PERM1       | PERM1    | 9.370970508 | 9.140321286 | 6.249990271 |
| 4.713771124 |          |             |             |             |
| CCDC173     | CCDC173  | 1.171371313 | 2.031182508 | 12.49998054 |
| 6.599279573 |          |             |             |             |
| NXPE3       | NXPE3    | 3039.708558 | 3247.86083  | 5346.420249 |
| 3701.253086 |          |             |             |             |
| MIR4461     | MIR4461  | 1.171371313 | 0           | 0           |
| MIR4458     | MIR4458  | 2.342742627 | 5.07795627  | 4.464278765 |
| 0.942754225 |          |             |             |             |
| EBLN2       | EBLN2    | 171.0202118 | 78.20052656 | 108.9284019 |
| 91.4471598  |          |             |             |             |
| SAMD4B      | SAMD4B   | 1444.30083  | 943.484275  | 1303.569399 |
| 1409.417566 |          |             |             |             |
| GOLGA3      | GOLGA3   | 2127.210305 | 1779.315877 | 1811.604323 |
| 1517.834302 |          |             |             |             |
| TAF5L       | TAF5L    | 988.6373886 | 300.6150112 | 251.7853224 |
| 271.5132167 |          |             |             |             |
| GPD1L       | GPD1L    | 1536.839163 | 1513.230969 | 1230.355228 |
| 1155.81668  |          |             |             |             |
| LGALS14     | LGALS14  | 0           | 2.031182508 | 13.3928363  |
| CEP135      | CEP135   | 1415.016547 | 1159.805212 | 3.771016899 |
| 1591.369131 |          |             |             |             |
| CCDC28A     | CCDC28A  | 1857.794903 | 1942.826069 | 1281.248006 |
| 2146.65137  |          |             |             |             |
| GRB7        | GRB7     | 3.51411394  | 19.29623383 | 2935.709716 |
| 5.656525348 |          |             |             |             |
| PIP5KL1     | PIP5KL1  | 5.856856567 | 12.18709505 | 19.64282657 |
| 27.33987252 |          |             |             |             |
| AP5Z1       | AP5Z1    | 3275.154192 | 4316.26283  | 26.78567259 |
| 3181.795508 |          |             |             |             |
| SV2A        | SV2A     | 144.0786716 | 108.6682642 | 4411.600276 |
| 303.5668604 |          |             |             |             |
| CACNA2D3    | CACNA2D3 |             | 0           | 341.0708977 |
| 1.885508449 |          |             |             |             |
| RQCD1       | RQCD1    | 5781.888803 | 7715.446757 | 0.892855753 |
| 3693.711052 |          |             |             |             |
| SNORA43     | SNORA43  | 12.88508445 | 9.140321286 | 4434.814525 |
| 16.02682182 |          |             |             |             |
| SNORA80E    | SNORA80E |             | 7.028227881 | 44.64278765 |
| 3.571423012 |          |             |             |             |
| RFPL1S      | RFPL1S   | 7.028227881 | 0           | 6.093547524 |
| SNORA40     | SNORA40  | 39.82662466 | 0           | 32.14280711 |
| 46.19495701 |          |             |             | 9.427542247 |
| ALOX12P2    | ALOX12P2 |             | 23.35859884 | 32.14280711 |
|             |          |             |             |             |
|             |          |             | 86.6814772  | 96.48116913 |

|              |              |             |             |             |
|--------------|--------------|-------------|-------------|-------------|
| 110.7141134  | 30.16813519  |             |             |             |
| TMEM127      | TMEM127      | 5658.894815 | 6287.525454 | 5698.205416 |
| 5631.070984  |              |             |             |             |
| SNORD72      | SNORD72      | 5.856856567 | 6.093547524 | 1.785711506 |
| 2.828262674  |              |             |             |             |
| SNORD74      | SNORD74      | 12.88508445 | 11.17150379 | 8.035701777 |
| 17.91233027  |              |             |             |             |
| HINFP        | HINFP        | 1618.835155 | 2165.240554 | 2906.245476 |
| 2168.334717  |              |             |             |             |
| FKBP7        | FKBP7        | 133.5363297 | 155.3854619 | 91.96414256 |
| 111.2449985  |              |             |             |             |
| HIST1H1B     | HIST1H1B     |             | 1138.572917 | 1261.364338 |
| 326.7852056  | 241.3450815  |             |             |             |
| TTC33        | TTC33        | 1482.956083 | 1388.313244 | 1450.890599 |
| 1784.633747  |              |             |             |             |
| HIST1H1D     | HIST1H1D     |             | 2915.543199 | 2115.476582 |
| 2064.282501  | 975.7506226  |             |             |             |
| HIST1H1C     | HIST1H1C     |             | 2307.601488 | 2067.743793 |
| 1608.926067  | 1007.804266  |             |             |             |
| PPP2R5B      | PPP2R5B      | 750.8490119 | 627.635395  | 808.0344565 |
| 630.7025763  |              |             |             |             |
| PSMG3-AS1    | PSMG3-AS1    |             | 455.6634409 | 632.7133513 |
| 407.1422234  | 526.9996116  |             |             |             |
| CSNK1A1P1    | CSNK1A1P1    |             | 0           | 0           |
| LINC01126    | LINC01126    |             | 11.71371313 | 9.140321286 |
| 8.92855753   | 0            |             |             |             |
| TJAP1        | TJAP1        | 969.8954475 | 943.484275  | 1177.676738 |
| 1182.213798  |              |             |             |             |
| ZNF524       | ZNF524       | 1069.462009 | 1304.01917  | 922.3199929 |
| 997.4339697  |              |             |             |             |
| FBLN7        | FBLN7        | 523.6029771 | 1603.61859  | 2164.282345 |
| 1844.027264  |              |             |             |             |
| ARHGEF19     | ARHGEF19     |             | 387.7239048 | 649.9784026 |
| 638.3918634  | 416.6973673  |             |             |             |
| GJB4         | GJB4         | 0           | 0           | 1.885508449 |
| KIF5B        | KIF5B        | 9735.266986 | 9296.72234  | 8746.414957 |
| 9072.123904  |              |             |             |             |
| NEURL4       | NEURL4       | 484.9477238 | 172.6505132 | 331.2494844 |
| 366.7313934  |              |             |             |             |
| TCFL5        | TCFL5        | 169.8488405 | 73.12257029 | 131.2497957 |
| 247.0016069  |              |             |             |             |
| TCAP         | TCAP         | 1.171371313 | 11.17150379 | 26.78567259 |
| 0.942754225  |              |             |             |             |
| SRSF2        | SRSF2        | 21933.92784 | 22772.60269 | 17467.82995 |
| 19301.00724  |              |             |             |             |
| RFC4         | RFC4         | 4968.957112 | 5090.143365 | 2430.35336  |
| 3671.084951  |              |             |             |             |
| SMARCC1      | SMARCC1      | 10897.26733 | 8876.26756  | 5909.812229 |
| 8350.916923  |              |             |             |             |
| LOC100093631 | LOC100093631 |             | 217.8750643 | 217.3365284 |

|                   |                   |             |             |   |
|-------------------|-------------------|-------------|-------------|---|
| 189.2854196       | 224.3755055       |             |             |   |
| ACTN3 ACTN3       | 23.42742627       | 14.21827756 | 16.07140355 |   |
| 7.542033798       |                   |             |             |   |
| GCH1 GCH1         | 7126.623071       | 7007.579653 | 5380.348768 |   |
| 4305.558544       |                   |             |             |   |
| CHAC1 CHAC1       | 92.53833376       | 122.8865417 | 581.2490952 |   |
| 398.7850371       |                   |             |             |   |
| METTL22 METTL22   | 637.2259945       | 728.1789292 | 672.320382  |   |
| 721.2069819       |                   |             |             |   |
| FBXW12 FBXW12     | 0 0               | 16.96425931 | 0           |   |
| LRP3 LRP3         | 4.685485254       | 8.124730032 | 15.1785478  |   |
| 8.484788022       |                   |             |             |   |
| LRRC29 LRRC29     | 130.0222158       | 115.777403  | 135.7140745 |   |
| 92.38991402       |                   |             |             |   |
| PTPRK PTPRK       | 652.4538216       | 1010.513298 | 677.6775165 |   |
| 398.7850371       |                   |             |             |   |
| MAPK8 MAPK8       | 921.8692237       | 565.6843285 | 707.1417564 |   |
| 596.7634242       |                   |             |             |   |
| IRF1 IRF1         | 16120.41202       | 20006.13211 | 48704.38847 |   |
| 33355.58722       |                   |             |             |   |
| ITGA9 ITGA9       | 51.54033779       | 42.65483267 | 0.892855753 |   |
| 9.427542247       |                   |             |             |   |
| TNRC18 TNRC18     | 409.9799597       | 145.2295493 | 172.3211603 |   |
| 326.1929618       |                   |             |             |   |
| ARID4B ARID4B     | 3959.235039       | 3593.161857 | 6878.560721 |   |
| 6512.546184       |                   |             |             |   |
| GINS2 GINS2       | 5137.634581       | 6628.764115 | 2741.960018 |   |
| 3471.221055       |                   |             |             |   |
| MIR3648-1         | MIR3648-1         | 22.25605496 | 7.109138778 |   |
| 36.60708587       | 18.85508449       |             |             |   |
| LINC01094         | LINC01094         | 10.54234182 | 7.109138778 | 0 |
| 0                 |                   |             |             |   |
| TRAPPC5 TRAPPC5   | 2585.216489       | 3242.782874 | 2363.389178 |   |
| 2122.13976        |                   |             |             |   |
| ANKRD62P1-PARP4P3 | ANKRD62P1-PARP4P3 | 0           | 0           |   |
| 1.785711506       | 0                 |             |             |   |
| ARPC5 ARPC5       | 38092.99511       | 37692.6538  | 18708.89945 |   |
| 25206.41971       |                   |             |             |   |
| UBL4A UBL4A       | 4909.217175       | 6851.1786   | 4166.064944 |   |
| 4494.109389       |                   |             |             |   |
| CBY1 CBY1         | 353.7541367       | 410.2988666 | 533.9277403 |   |
| 549.625713        |                   |             |             |   |
| AIMP1 AIMP1       | 2787.863726       | 3310.827488 | 2858.924121 |   |
| 3044.153392       |                   |             |             |   |
| TMF1 TMF1         | 4062.315715       | 4715.390193 | 4442.850227 |   |
| 4220.710664       |                   |             |             |   |
| JAK1 JAK1         | 30151.09761       | 27609.86383 | 32728.52048 |   |
| 32663.60562       |                   |             |             |   |
| C10orf32          | C10orf32          | 1040.177726 | 1031.840714 |   |
| 933.0342619       | 1165.244222       |             |             |   |

|             |           |             |             |             |
|-------------|-----------|-------------|-------------|-------------|
| RBM4        | RBM4      | 6633.475748 | 7817.005882 | 9003.557414 |
| 8120.884892 |           |             |             |             |
| FAM24B      | FAM24B    | 174.5343257 | 118.8241767 | 191.9639869 |
| 229.0892766 |           |             |             |             |
| HAUS7       | HAUS7     | 1731.286801 | 2504.448032 | 1804.461477 |
| 1910.020059 |           |             |             |             |
| HSP90AB4P   | HSP90AB4P |             | 18.74194102 | 4.062365016 |
| 28.5713841  |           | 11.3130507  |             |             |
| UGDH        | UGDH      | 2493.849526 | 2768.501759 | 3167.852212 |
| 3369.403599 |           |             |             |             |
| MTF2        | MTF2      | 6087.616716 | 6728.292058 | 4136.600704 |
| 4693.030531 |           |             |             |             |
| CCNL2       | CCNL2     | 3818.670482 | 3445.901125 | 5216.063309 |
| 5397.267936 |           |             |             |             |
| GST02       | GST02     | 35.1411394  | 24.3741901  | 110.7141134 |
| 77.30584643 |           |             |             |             |
| PDYN        | PDYN      | 0           | 10.71426904 | 0           |
|             |           | 0           |             |             |
| CCNI2       | CCNI2     | 302.2137989 | 717.0074254 | 321.4280711 |
| 341.2770293 |           |             |             |             |
| ARHGAP9     | ARHGAP9   | 7884.500311 | 7994.734352 | 3530.351647 |
| 5750.800771 |           |             |             |             |
| TMED6       | TMED6     | 28.11291152 | 14.21827756 | 24.99996108 |
| 16.96957604 |           |             |             |             |
| CEP152      | CEP152    | 2415.367648 | 2362.265257 | 1267.855169 |
| 2133.452811 |           |             |             |             |
| SCYL2       | SCYL2     | 3863.182592 | 3624.645186 | 2842.852718 |
| 3367.518091 |           |             |             |             |
| SEC23IP     | SEC23IP   | 7722.85107  | 7968.328979 | 5364.277364 |
| 6209.922078 |           |             |             |             |
| ARR3        | ARR3      | 12.88508445 | 9.140321286 | 3.571423012 |
| 8.484788022 |           |             |             |             |
| MRPL57      | MRPL57    | 4748.739305 | 5194.749264 | 4528.564379 |
| 4373.436848 |           |             |             |             |
| ACAT1       | ACAT1     | 6786.92539  | 9599.368533 | 4158.029242 |
| 5138.010525 |           |             |             |             |
| PPFIBP1     | PPFIBP1   | 466.2057828 | 675.3681839 | 386.6065411 |
| 168.7530062 |           |             |             |             |
| TIAF1       | TIAF1     | 1013.236186 | 566.6999198 | 433.927896  |
| 527.9423658 |           |             |             |             |
| FNBP4       | FNBP4     | 3640.622042 | 2634.443713 | 5356.241662 |
| 4577.071761 |           |             |             |             |
| MTG1        | MTG1      | 3043.222672 | 3014.274842 | 2946.423985 |
| 3163.883178 |           |             |             |             |
| TMEM79      | TMEM79    | 657.1393069 | 516.9359483 | 1080.355461 |
| 817.3679128 |           |             |             |             |
| PRPF19      | PRPF19    | 1573.151674 | 545.3725034 | 578.570528  |
| 452.5220279 |           |             |             |             |
| LINC00521   | LINC00521 |             | 2.342742627 | 4.062365016 |
| 9.821413283 |           | 0           |             |             |
| SPACA6P     | SPACA6P   | 11.71371313 | 5.07795627  | 64.28561422 |

|                         |               |               |               |   |   |
|-------------------------|---------------|---------------|---------------|---|---|
| 19.79783872             |               |               |               |   |   |
| HINT1 HINT1             | 18658.77365   | 20112.7692    | 12268.7309    |   |   |
| 13176.8758              |               |               |               |   |   |
| GHRL05 GHRL05           | 253.0162037   | 183.822017    | 171.4283046   |   |   |
| 181.0088111             |               |               |               |   |   |
| KBTBD4 KBTBD4           | 4018.974976   | 4793.590719   | 4062.493676   |   |   |
| 3682.398002             |               |               |               |   |   |
| RNF135 RNF135           | 810.5889489   | 982.0767427   | 517.8563368   |   |   |
| 782.4860065             |               |               |               |   |   |
| NUDT9 NUDT9             | 754.3631259   | 940.4375013   | 1428.569205   |   |   |
| 1206.725408             |               |               |               |   |   |
| FAM217A FAM217A         | 0 0           | 0.892855753   | 12.25580492   |   |   |
| TMEM132D TMEM132D       |               | 0 4.062365016 | 0             | 0 | 0 |
| GRIN3A GRIN3A           | 11.71371313   | 3.046773762   | 7.142846024   |   |   |
| 8.484788022             |               |               |               |   |   |
| AMOTL1 AMOTL1           | 154.6210134   | 166.5569657   | 8.92855753    |   |   |
| 18.85508449             |               |               |               |   |   |
| RNF152 RNF152           | 0 0           | 0.892855753   | 6.599279573   |   |   |
| CCDC83 CCDC83           | 0 3.046773762 | 0             | 0             |   |   |
| TYSND1 TYSND1           | 1208.855195   | 1228.865417   | 1230.355228   |   |   |
| 1811.97362              |               |               |               |   |   |
| CCDC171 CCDC171         | 94.88107639   | 93.43439537   | 74.99988325   |   |   |
| 88.61889712             |               |               |               |   |   |
| LBH LBH                 | 13936.97589   | 9948.731925   | 16857.11662   |   |   |
| 17757.71858             |               |               |               |   |   |
| TRIM8 TRIM8             | 3245.86991    | 2840.608738   | 2116.068135   |   |   |
| 2493.584924             |               |               |               |   |   |
| EXOSC6 EXOSC6           | 2854.631891   | 4328.449925   | 3019.638157   |   |   |
| 2585.974838             |               |               |               |   |   |
| YTHDC2 YTHDC2           | 2295.887774   | 1649.320197   | 1888.389918   |   |   |
| 2503.012467             |               |               |               |   |   |
| TES TES                 | 9921.515025   | 12079.44238   | 9176.77143    |   |   |
| 8243.442941             |               |               |               |   |   |
| ZNF441 ZNF441           | 442.7783565   | 292.4902812   | 2015.175435   |   |   |
| 2104.22743              |               |               |               |   |   |
| DHDH DHDH               | 22.25605496   | 37.5768764    | 58.9284797    |   |   |
| 50.90872813             |               |               |               |   |   |
| LRRC8D LRRC8D           | 3421.575607   | 2918.809264   | 4353.564652   |   |   |
| 4378.15062              |               |               |               |   |   |
| HNRNPD L HNRNPD L       | 9572.446374   | 8173.478413   | 11945.51712   |   |   |
| 12103.07874             |               |               |               |   |   |
| ELM02 ELM02             | 7038.770223   | 8557.371907   | 7513.381162   |   |   |
| 6470.122244             |               |               |               |   |   |
| RBAK-RBAKDN RBAK-RBAKDN |               | 163.9919839   | 129.9956805   |   |   |
| 276.7852834 247.9443611 |               |               |               |   |   |
| TACR2 TACR2             | 2.342742627   | 3.046773762   | 0 9.427542247 |   |   |
| LOC644656 LOC644656     |               | 77.31050669   | 90.38762161   |   |   |
| 54.46420093 52.79423658 |               |               |               |   |   |
| ZFP37 ZFP37             | 30.45565415   | 82.26289158   | 333.0351959   |   |   |
| 155.5544471             |               |               |               |   |   |



|             |             |             |             |             |             |
|-------------|-------------|-------------|-------------|-------------|-------------|
| KCNJ2-AS1   | KCNJ2-AS1   | 2.342742627 | 0           | 0           | 0           |
| PTPN22      | PTPN22      | 10463.85994 | 9352.579859 | 3627.672925 |             |
| 6653.016564 |             |             |             |             |             |
| CES3        | CES3        | 31.62702546 | 40.62365016 | 33.92851862 |             |
| 29.22538097 |             |             |             |             |             |
| CFI         | CFI         | 10.54234182 | 4.062365016 | 0           | 11.3130507  |
| THOC7-AS1   | THOC7-AS1   | 1.171371313 | 1.171371313 | 1.015591254 | 0           |
| 1.885508449 |             |             |             |             |             |
| CTBP1-AS    | CTBP1-AS    | 3682.79141  | 3682.79141  | 3086.381821 |             |
| 2450.889042 | 2576.547296 |             |             |             |             |
| ZNF471      | ZNF471      | 3.51411394  | 5.07795627  | 5.357134518 |             |
| 32.05364364 |             |             |             |             |             |
| ARHGAP20    | ARHGAP20    | 3.51411394  | 3.51411394  | 2.031182508 | 0           |
| 0           |             |             |             |             |             |
| RAD52       | RAD52       | 538.8308042 | 437.7198305 | 700.8917661 |             |
| 756.0888882 |             |             |             |             |             |
| STAMPB      | STAMPB      | 3514.11394  | 3665.268836 | 3038.388128 |             |
| 3655.058129 |             |             |             |             |             |
| TM4SF19     | TM4SF19     | 4.685485254 | 2.031182508 | 36.60708587 |             |
| 12.25580492 |             |             |             |             |             |
| GLI4        | GLI4        | 347.8972801 | 253.8978135 | 275.8924277 |             |
| 268.684954  |             |             |             |             |             |
| ISCA1       | ISCA1       | 2293.545032 | 2285.080322 | 2903.566909 |             |
| 2929.137376 |             |             |             |             |             |
| KIF9        | KIF9        | 178.0484396 | 193.9779295 | 124.1069497 |             |
| 160.2682182 |             |             |             |             |             |
| EIF3CL      | EIF3CL      | 1240.482221 | 2113.4454   | 1486.604829 |             |
| 1597.025657 |             |             |             |             |             |
| ANKRD16     | ANKRD16     | 297.5283136 | 370.6908077 | 591.9633643 |             |
| 432.7241891 |             |             |             |             |             |
| RAP1B       | RAP1B       | 15560.49653 | 16068.68482 | 14702.65569 |             |
| 16043.7914  |             |             |             |             |             |
| IL12B       | IL12B       | 29.28428284 | 17.26505132 | 0           | 8.484788022 |
| ABHD14A     | ABHD14A     | 841.0446031 | 1114.103606 | 1681.247383 |             |
| 1273.660958 |             |             |             |             |             |
| SYNJ2BP     | SYNJ2BP     | 456.8348122 | 471.2343419 | 915.1771469 |             |
| 1039.85791  |             |             |             |             |             |
| STARD8      | STARD8      | 14.05645576 | 42.65483267 | 2.678567259 |             |
| 3.771016899 |             |             |             |             |             |
| RAB5B       | RAB5B       | 4171.253247 | 3234.658144 | 4283.921903 |             |
| 4291.417231 |             |             |             |             |             |
| PKMYT1      | PKMYT1      | 7124.280328 | 8817.363268 | 3045.530974 |             |
| 3940.712659 |             |             |             |             |             |
| TARS        | TARS        | 10258.86996 | 12652.23584 | 13545.51463 |             |
| 11594.93421 |             |             |             |             |             |
| ZNF547      | ZNF547      | 276.44363   | 294.5214637 | 686.6060741 |             |
| 524.1713489 |             |             |             |             |             |
| DNAH17      | DNAH17      | 368.9819637 | 370.6908077 | 377.6779835 |             |
| 384.6437237 |             |             |             |             |             |
| USP39       | USP39       | 7527.23206  | 8819.39445  | 6989.274835 |             |

|             |         |             |             |             |             |
|-------------|---------|-------------|-------------|-------------|-------------|
| 5943.122633 |         |             |             |             |             |
| FAM132B     | FAM132B | 1.171371313 | 15.23386881 | 0           | 4.713771124 |
| DPH5        | DPH5    | 1304.907643 | 1895.09328  | 1343.747908 |             |
| 1504.635743 |         |             |             |             |             |
| PPA2        | PPA2    | 3928.779385 | 4331.496699 | 3319.63769  |             |
| 3770.074145 |         |             |             |             |             |
| ARMS2       | ARMS2   | 0           | 7.142846024 | 0           |             |
| POMT2       | POMT2   | 313.927512  | 240.6951272 | 416.9636367 |             |
| 328.0784702 |         |             |             |             |             |
| NSUN7       | NSUN7   | 3.51411394  | 0           | 11.60712479 | 0           |
| TTI2        | TTI2    | 3733.160376 | 4482.819795 | 3572.315868 |             |
| 3624.889994 |         |             |             |             |             |
| SFXN3       | SFXN3   | 1760.571084 | 1415.734208 | 1384.819273 |             |
| 1841.199001 |         |             |             |             |             |
| CDHR5       | CDHR5   | 4.685485254 | 0           | 3.571423012 | 1.885508449 |
| SAC3D1      | SAC3D1  | 1668.03275  | 2137.81959  | 1159.819623 |             |
| 1070.968799 |         |             |             |             |             |
| RBP5        | RBP5    | 1.171371313 | 8.124730032 | 16.96425931 |             |
| 20.74059294 |         |             |             |             |             |
| L3MBTL2     | L3MBTL2 | 4399.670653 | 5727.934673 | 3986.600937 |             |
| 4004.819947 |         |             |             |             |             |
| OR10A5      | OR10A5  | 2.342742627 | 0           | 0           | 0           |
| MTRF1L      | MTRF1L  | 890.2421982 | 1320.26863  | 891.0700415 |             |
| 782.4860065 |         |             |             |             |             |
| HES2        | HES2    | 58.56856567 | 35.54569389 | 29.46423985 | 0           |
| YME1L1      | YME1L1  | 14770.99226 | 17063.96425 | 13463.3719  |             |
| 13141.99389 |         |             |             |             |             |
| LRRC73      | LRRC73  | 4.685485254 | 0           | 0           | 0           |
| PLAC9       | PLAC9   | 4.685485254 | 7.109138778 | 7.142846024 | 0           |
| FAM209A     | FAM209A | 17.5705697  | 15.23386881 | 27.67852834 |             |
| 7.542033798 |         |             |             |             |             |
| SPIN4       | SPIN4   | 436.9214999 | 315.84888   | 217.8568037 |             |
| 180.0660569 |         |             |             |             |             |
| OCIAD2      | OCIAD2  | 4855.334094 | 6945.628586 | 6716.95383  |             |
| 5006.967687 |         |             |             |             |             |
| CDR1        | CDR1    | 3.51411394  | 1.015591254 | 0           | 0           |
| SURF6       | SURF6   | 1306.079015 | 1812.830388 | 2328.567804 |             |
| 2091.971625 |         |             |             |             |             |
| C1orf52     | C1orf52 | 1320.13547  | 1282.691754 | 1547.31902  |             |
| 1576.285064 |         |             |             |             |             |
| TTBK1       | TTBK1   | 26.94154021 | 2.031182508 | 0           | 14.14131337 |
| HEATR9      | HEATR9  | 10.54234182 | 12.18709505 | 0           | 13.19855915 |
| SWT1        | SWT1    | 324.4698538 | 318.8956538 | 933.9271177 |             |
| 609.0192292 |         |             |             |             |             |
| OR7E14P     | OR7E14P | 2.342742627 | 6.093547524 | 3.571423012 |             |
| 10.37029647 |         |             |             |             |             |
| UGT2A2      | UGT2A2  | 0           | 4.062365016 | 0           | 0           |
| WDR38       | WDR38   | 462.6916688 | 503.733262  | 495.5349429 |             |
| 481.7474088 |         |             |             |             |             |
| MIR4741     | MIR4741 | 80.82462063 | 134.0580455 | 59.82133545 |             |

|                 |             |             |             |             |
|-----------------|-------------|-------------|-------------|-------------|
| 69.76381263     |             |             |             |             |
| POTEE POTEE     | 70.28227881 | 69.06020528 | 17.85711506 |             |
| 25.45436407     |             |             |             |             |
| GABRR3 GABRR3   | 3.51411394  | 1.015591254 | 0           | 0           |
| ICA1 ICA1       | 189.7621528 | 123.902133  | 190.1782754 |             |
| 250.7726238     |             |             |             |             |
| ZNF236 ZNF236   | 1041.349098 | 807.395047  | 854.4629556 |             |
| 1153.931171     |             |             |             |             |
| TCF25 TCF25     | 5013.469222 | 5936.13088  | 8099.987391 |             |
| 6439.954109     |             |             |             |             |
| ELP3 ELP3       | 3443.831662 | 4430.00905  | 3910.708198 |             |
| 3648.45885      |             |             |             |             |
| SGMS2 SGMS2     | 43.3407386  | 35.54569389 | 48.21421066 |             |
| 26.39711829     |             |             |             |             |
| GPCPD1 GPCPD1   | 1882.393701 | 1884.937368 | 3171.423635 |             |
| 3126.173009     |             |             |             |             |
| OAT OAT         | 4154.854049 | 5896.522821 | 4874.992412 |             |
| 4831.615402     |             |             |             |             |
| CCR2 CCR2       | 5325.053991 | 9930.451282 | 1200.890988 |             |
| 3178.967246     |             |             |             |             |
| TBC1D3 TBC1D3   | 69.11090749 | 30.46773762 | 64.28561422 |             |
| 82.01961755     |             |             |             |             |
| DDHD1 DDHD1     | 4320.017404 | 4498.053664 | 4694.635549 |             |
| 5153.094592     |             |             |             |             |
| CPOX CPOX       | 6111.044142 | 7348.818314 | 2851.781275 |             |
| 3967.109778     |             |             |             |             |
| CDR2 CDR2       | 5702.235554 | 6112.843758 | 4790.171115 |             |
| 4929.661841     |             |             |             |             |
| GLRA1 GLRA1     | 1.171371313 | 0           | 6.249990271 | 1.885508449 |
| NLRP2 NLRP2     | 836.3591178 | 343.2698439 | 94.64270982 |             |
| 312.9944026     |             |             |             |             |
| C2orf83 C2orf83 | 0           | 1.015591254 | 0           | 0           |
| ENPP3 ENPP3     | 25.7701689  | 63.98224901 | 51.78563368 |             |
| 9.427542247     |             |             |             |             |
| UBQLNL UBQLNL   | 3.51411394  | 1.015591254 | 0           | 0.942754225 |
| KCTD3 KCTD3     | 480.2622385 | 656.0719501 | 154.4640453 |             |
| 261.1429202     |             |             |             |             |
| FSTL5 FSTL5     | 0           | 0           | 0           | 0.942754225 |
| BAGE2 BAGE2     | 0           | 0           | 0           | 0.942754225 |
| KPNA2 KPNA2     | 27968.83285 | 40324.05074 | 16309.79604 |             |
| 22773.17105     |             |             |             |             |
| KPNB1 KPNB1     | 9041.815169 | 5315.604624 | 5361.598797 |             |
| 6008.172674     |             |             |             |             |
| SLC35A3 SLC35A3 | 1123.34509  | 888.6423473 | 1052.676933 |             |
| 1228.408755     |             |             |             |             |
| SP2 SP2         | 1668.03275  | 864.2681572 | 1047.319798 |             |
| 836.2229973     |             |             |             |             |
| RNASEH2B        | RNASEH2B    | 4496.894472 | 4077.598885 |             |
| 2296.424997     | 2910.282292 |             |             |             |
| MIIP MIIP       | 2253.718407 | 3389.028015 | 2928.56687  |             |

|              |              |             |             |             |
|--------------|--------------|-------------|-------------|-------------|
| 2483.214628  |              |             |             |             |
| DYX1C1       | DYX1C1       | 16.39919839 | 24.3741901  | 10.71426904 |
| 23.56885562  |              |             |             |             |
| TMEM180      | TMEM180      | 1037.834984 | 321.9424275 | 374.1065605 |
| 759.8599051  |              |             |             |             |
| CSPP1        | CSPP1        | 586.857028  | 542.3257297 | 974.9984823 |
| 754.2033798  |              |             |             |             |
| RNU6-72P     | RNU6-72P     | 0           | 0           | 5.357134518 |
| 5.656525348  |              |             |             |             |
| RNU6-78P     | RNU6-78P     | 1.171371313 |             | 2.031182508 |
| 8.035701777  | 6.599279573  |             |             |             |
| RNU6-83P     | RNU6-83P     | 1.171371313 | 0           | 0.892855753 |
| 0            |              |             |             |             |
| RAB36        | RAB36        | 5.856856567 | 5.07795627  | 89.2855753  |
| 70.70656685  |              |             |             |             |
| NDRG1        | NDRG1        | 2587.559231 | 2557.258778 | 2139.282384 |
| 2160.792683  |              |             |             |             |
| LRRC71       | LRRC71       | 0           | 0           | 0.892855753 |
| LZTR1        | LZTR1        | 2405.996678 | 1821.97071  | 1858.032822 |
| 2218.300691  |              |             |             |             |
| LYZ          | LYZ          | 183.9052962 | 3906.979554 | 708.9274679 |
| 22.62610139  |              |             |             |             |
| RNPEPL1      | RNPEPL1      | 7625.627251 | 8534.013308 | 4414.278843 |
| 5568.849205  |              |             |             |             |
| KLHL34       | KLHL34       | 15.22782708 | 31.48332888 | 133.928363  |
| 117.8442781  |              |             |             |             |
| LIN7A        | LIN7A        | 7.028227881 | 16.24946006 | 1.785711506 |
| 2.828262674  |              |             |             |             |
| DCUN1D1      | DCUN1D1      | 3714.418435 | 3305.749532 | 2507.138955 |
| 3011.156994  |              |             |             |             |
| RAVER1       | RAVER1       | 5232.515657 | 3040.680215 | 2353.567765 |
| 2363.484841  |              |             |             |             |
| LDHD         | LDHD         | 18.74194102 | 13.2026863  | 21.42853807 |
| 16.96957604  |              |             |             |             |
| COPS3        | COPS3        | 9025.41597  | 10210.75447 | 6516.954141 |
| 7007.492152  |              |             |             |             |
| TRIM39-RPP21 | TRIM39-RPP21 | 432.1421845 | 38.65525334 | 191.946747  |
| 66.93554995  |              |             |             |             |
| UBE2L3       | UBE2L3       | 11787.50953 | 15135.35646 | 8693.736467 |
| 9515.21839   |              |             |             |             |
| LINC00597    | LINC00597    | 5.856856567 | 0           | 12.49998054 |
| 0            |              |             |             |             |
| RUNX1-IT1    | RUNX1-IT1    | 221.4282268 | 159.3064986 | 88.3564391  |
| 186.6653365  |              |             |             |             |
| LINC00887    | LINC00887    | 9.821413283 | 120.6512453 | 43.67042392 |
| 27.33987252  |              |             |             |             |
| LINC00638    | LINC00638    | 247.3210436 | 15.22782708 | 23.35859884 |
| 88.61889712  |              |             |             |             |
| RNF165       | RNF165       | 4.685485254 | 6.093547524 | 0.892855753 |
| 6.599279573  |              |             |             |             |

|              |              |             |             |             |             |
|--------------|--------------|-------------|-------------|-------------|-------------|
| LINC00689    | LINC00689    |             | 15.22782708 | 10.15591254 | 0           |
|              | 31.11088942  |             |             |             |             |
| PHKB         | PHKB         | 3929.950757 | 3680.502705 | 2089.282462 |             |
| 2920.652588  |              |             |             |             |             |
| NNT-AS1      | NNT-AS1      | 523.6029771 | 477.3278894 | 435.7136075 |             |
| 425.1821553  |              |             |             |             |             |
| EPN2-IT1     | EPN2-IT1     |             | 5.856856567 | 3.046773762 | 0           |
|              | 2.828262674  |             |             |             |             |
| FER1L6-AS2   | FER1L6-AS2   |             | 0           | 0           | 0.942754225 |
| FDPS         | FDPS         | 9657.956479 | 11235.48604 | 5675.884022 |             |
| 7335.570623  |              |             |             |             |             |
| XRN1         | XRN1         | 5942.366673 | 4388.369809 | 8805.343436 |             |
| 9006.131109  |              |             |             |             |             |
| ZFP82        | ZFP82        | 347.8972801 | 349.3633914 | 1214.283824 |             |
| 1326.455194  |              |             |             |             |             |
| NOL4L        | NOL4L        | 661.8247921 | 399.1273628 | 1166.069613 |             |
| 1741.267053  |              |             |             |             |             |
| GLRX2        | GLRX2        | 821.1312907 | 865.2837485 | 568.7491147 |             |
| 731.5772784  |              |             |             |             |             |
| FGD5-AS1     | FGD5-AS1     |             | 4712.426794 | 2959.432914 |             |
| 4831.24248   | 4512.964474  |             |             |             |             |
| CHEK1        | CHEK1        | 4486.352131 | 4388.369809 | 1864.282812 |             |
| 2504.897975  |              |             |             |             |             |
| LOC100507600 | LOC100507600 |             | 117.1371313 | 134.0580455 |             |
| 69.64274874  | 49.96597391  |             |             |             |             |
| LOC646626    | LOC646626    |             | 263.5585455 | 354.4413477 |             |
| 314.2852251  | 293.1965639  |             |             |             |             |
| CCDC148      | CCDC148      | 0           | 5.07795627  | 0.892855753 | 0           |
| MAMSTR       | MAMSTR       | 57.39719436 | 66.01343151 | 113.3926806 |             |
| 94.27542247  |              |             |             |             |             |
| RBM45        | RBM45        | 1169.028571 | 1393.391201 | 727.6774387 |             |
| 789.0852861  |              |             |             |             |             |
| KCNQ5        | KCNQ5        | 193.2762667 | 243.741901  | 140.1783532 |             |
| 129.1573288  |              |             |             |             |             |
| PLCD4        | PLCD4        | 37.48388203 | 24.3741901  | 84.82129654 |             |
| 101.8174563  |              |             |             |             |             |
| PTPLAD1      | PTPLAD1      | 6515.167245 | 7650.448917 | 4927.670901 |             |
| 5172.892431  |              |             |             |             |             |
| SLC39A13     | SLC39A13     |             | 1507.55488  | 1754.941687 |             |
| 2132.139538  | 2169.277471  |             |             |             |             |
| FAM66A       | FAM66A       | 11.71371313 | 6.093547524 | 12.49998054 |             |
| 26.39711829  |              |             |             |             |             |
| VPS45        | VPS45        | 2687.125793 | 2882.247979 | 2191.960874 |             |
| 2393.652977  |              |             |             |             |             |
| HARS2        | HARS2        | 2547.732607 | 3011.228068 | 3549.994474 |             |
| 2775.468438  |              |             |             |             |             |
| BRE-AS1      | BRE-AS1      | 268.2440308 | 378.8155378 | 240.1781976 |             |
| 296.9675808  |              |             |             |             |             |
| LPAR1        | LPAR1        | 0           | 0           | 6.599279573 |             |
| CSRNP3       | CSRNP3       | 0           | 0           | 0.892855753 | 0           |

|                |                |             |             |             |             |
|----------------|----------------|-------------|-------------|-------------|-------------|
| DUSP4          | DUSP4          | 16437.85364 | 16272.81866 | 5858.919451 |             |
| 8036.037011    |                |             |             |             |             |
| EEF1A1         | EEF1A1         | 87813.02188 | 115643.3449 | 154512.2595 |             |
| 143358.9784    |                |             |             |             |             |
| ZNF816-ZNF321P | ZNF816-ZNF321P | 474.9992606 | 203.8186085 | 244.7574922 |             |
| 449.6937652    |                |             |             |             |             |
| METTL2B        | METTL2B        | 1307.250386 | 1682.834708 | 1442.854897 |             |
| 1277.431974    |                |             |             |             |             |
| KIAA1211       | KIAA1211       |             | 10.54234182 | 16.24946006 | 0           |
| 0              |                |             |             |             |             |
| HELZ           | HELZ           | 7210.961806 | 5448.647078 | 5306.24174  |             |
| 6495.576608    |                |             |             |             |             |
| ZKSCAN7        | ZKSCAN7        | 52.71170911 | 37.5768764  | 197.3211214 |             |
| 234.745802     |                |             |             |             |             |
| GPRC5C         | GPRC5C         | 1.171371313 | 2.031182508 | 13.3928363  | 0           |
| SLC35E3        | SLC35E3        | 687.594961  | 845.9875146 | 487.4992412 |             |
| 721.2069819    |                |             |             |             |             |
| LENEP          | LENEP          | 2.342742627 | 2.031182508 | 7.142846024 | 0           |
| BTN3A3         | BTN3A3         | 2046.385685 | 1860.563177 | 9058.021614 |             |
| 5959.149454    |                |             |             |             |             |
| ZNF10          | ZNF10          | 241.3024906 | 225.4612584 | 975.8913381 |             |
| 526.0568574    |                |             |             |             |             |
| RNF5           | RNF5           | 0           | 1.015591254 | 2.678567259 | 0.942754225 |
| RIT1           | RIT1           | 1361.133466 | 1468.544953 | 1188.391007 |             |
| 1527.261844    |                |             |             |             |             |
| RLN1           | RLN1           | 49.19759517 | 39.60805891 | 99.99984434 |             |
| 26.39711829    |                |             |             |             |             |
| DDX52          | DDX52          | 3857.325735 | 4365.01121  | 2562.496011 |             |
| 3168.596949    |                |             |             |             |             |
| FAM114A1       | FAM114A1       |             | 32.79839678 | 43.67042392 |             |
| 44.64278765    |                | 16.02682182 |             |             |             |
| KRTCAP2        | KRTCAP2        | 4337.587974 | 4191.345105 | 4409.814564 |             |
| 4401.719475    |                |             |             |             |             |
| APOA1          | APOA1          | 0           | 4.062365016 | 3.571423012 | 1.885508449 |
| ABCD1          | ABCD1          | 282.3004865 | 107.6526729 | 144.642632  |             |
| 137.6421168    |                |             |             |             |             |
| CEACAM3        | CEACAM3        | 1.171371313 | 1.015591254 | 1.785711506 | 0           |
| ENTPD2         | ENTPD2         | 24.59879758 | 23.35859884 | 9.821413283 |             |
| 20.74059294    |                |             |             |             |             |
| EPS8           | EPS8           | 22.25605496 | 57.88870148 | 225.8925055 |             |
| 198.9211414    |                |             |             |             |             |
| LAMC1          | LAMC1          | 4.685485254 | 7.109138778 | 23.21424958 |             |
| 1.885508449    |                |             |             |             |             |
| C10orf120      | C10orf120      |             | 0           | 0           | 0.942754225 |
| BVES           | BVES           | 86.6814772  | 4.062365016 | 0           | 16.02682182 |
| CALY           | CALY           | 0           | 61.60704696 | 12.25580492 |             |
| ADCY6          | ADCY6          | 5.856856567 | 11.17150379 | 0           | 0           |
| LRIF1          | LRIF1          | 1946.819123 | 1951.96639  | 3190.173606 |             |
| 2390.824714    |                |             |             |             |             |
| CENPJ          | CENPJ          | 1473.585112 | 1607.680955 | 699.9989104 |             |

|                 |             |             |   |             |             |
|-----------------|-------------|-------------|---|-------------|-------------|
| 853.1925734     |             |             |   |             |             |
| CCDC162P        | CCDC162P    | 0           | 0 | 0           | 2.828262674 |
| MRPL23-AS1      | MRPL23-AS1  | 2.342742627 |   | 0           | 16.07140355 |
|                 | 2.828262674 |             |   |             |             |
| LINC00704       | LINC00704   | 1.171371313 |   | 0           | 0 0         |
| MIR623 MIR623   | 1.171371313 | 0           | 0 | 0           |             |
| ALKBH3-AS1      | ALKBH3-AS1  | 12.88508445 |   | 11.17150379 |             |
| 13.3928363      | 7.542033798 |             |   |             |             |
| TMEM126A        | TMEM126A    | 2280.659947 |   | 1797.59652  |             |
| 1252.676622     | 1781.805485 |             |   |             |             |
| CTU1 CTU1       | 480.2622385 | 660.1343151 |   | 474.1064049 |             |
| 378.9871983     |             |             |   |             |             |
| BTRC BTRC       | 1676.23235  | 1919.46747  |   | 2139.282384 |             |
| 2206.98764      |             |             |   |             |             |
| TVP23C TVP23C   | 202.6472372 | 257.9601785 |   | 288.3924082 |             |
| 229.0892766     |             |             |   |             |             |
| ZBTB49 ZBTB49   | 399.4376179 | 352.4101652 |   | 1032.141251 |             |
| 658.9852031     |             |             |   |             |             |
| UBR1 UBR1       | 4564.834009 | 3474.33768  |   | 3100.88803  |             |
| 3550.41241      |             |             |   |             |             |
| KHDRBS1 KHDRBS1 | 14043.57068 | 14094.37542 |   | 11678.55325 |             |
| 12582.94064     |             |             |   |             |             |
| POLR2L POLR2L   | 4965.442998 | 5178.499804 |   | 3299.102007 |             |
| 3125.230255     |             |             |   |             |             |
| ZWINT ZWINT     | 14878.75842 | 17539.26096 |   | 6041.954881 |             |
| 8212.332051     |             |             |   |             |             |
| APOBEC2 APOBEC2 | 55.05445173 | 24.3741901  |   | 66.07132572 |             |
| 63.16453306     |             |             |   |             |             |
| STAT5B STAT5B   | 13204.86882 | 9130.165374 |   | 9839.270398 |             |
| 10600.3285      |             |             |   |             |             |
| SF3B3 SF3B3     | 22786.68616 | 24816.98788 |   | 18149.97175 |             |
| 19200.13254     |             |             |   |             |             |
| FHL3 FHL3       | 746.1635267 | 1005.435342 |   | 624.1061714 |             |
| 533.5988912     |             |             |   |             |             |
| SRM SRM         | 12020.61242 | 18189.23936 |   | 11475.87499 |             |
| 10556.96181     |             |             |   |             |             |
| GOLGA6L5P       | GOLGA6L5P   | 5.856856567 |   | 9.140321286 |             |
| 32.14280711     | 25.45436407 |             |   |             |             |
| C6orf163        | C6orf163    | 16.39919839 |   | 10.15591254 |             |
| 19.64282657     | 17.91233027 |             |   |             |             |
| TGDS TGDS       | 1702.002518 | 1757.988461 |   | 2025.889704 |             |
| 1742.209807     |             |             |   |             |             |
| QRICH1 QRICH1   | 5367.223358 | 5581.689532 |   | 6153.56185  |             |
| 5022.994509     |             |             |   |             |             |
| TMEM104 TMEM104 | 1543.867391 | 1900.171236 |   | 958.034223  |             |
| 832.4519804     |             |             |   |             |             |
| ZSCAN10 ZSCAN10 | 3.51411394  | 5.07795627  |   | 0 0         |             |
| ADO ADO         | 458.0061836 | 172.6505132 |   | 216.0710922 |             |
| 502.4880018     |             |             |   |             |             |
| ZBTB45 ZBTB45   | 543.5162894 | 298.5838287 |   | 311.6066578 |             |

|             |          |             |             |             |             |
|-------------|----------|-------------|-------------|-------------|-------------|
| 321.4791906 |          |             |             |             |             |
| ZNF514      | ZNF514   | 58.56856567 | 60.93547524 | 92.85699832 |             |
| 126.3290661 |          |             |             |             |             |
| ZC3H10      | ZC3H10   | 561.0868591 | 536.2321821 | 1216.069536 |             |
| 1046.457189 |          |             |             |             |             |
| CCDC142     | CCDC142  | 890.2421982 | 881.5332085 | 1731.247305 |             |
| 1140.732612 |          |             |             |             |             |
| STK39       | STK39    | 2758.579443 | 1247.14606  | 698.2131989 |             |
| 1804.431586 |          |             |             |             |             |
| SCARF2      | SCARF2   | 30.45565415 | 16.24946006 | 42.85707615 |             |
| 32.99639787 |          |             |             |             |             |
| TCEAL8      | TCEAL8   | 2005.387689 | 1879.859411 | 1827.675726 |             |
| 2215.472428 |          |             |             |             |             |
| MBLAC2      | MBLAC2   | 215.5323217 | 200.071477  | 437.499319  |             |
| 505.3162644 |          |             |             |             |             |
| EMR4P       | EMR4P    | 0           | 0           | 30.3570956  | 37.71016899 |
| MIR3140     | MIR3140  | 0           | 1.015591254 | 0           | 0           |
| PDXDC2P     | PDXDC2P  | 222.5605496 | 158.4322356 | 691.0703528 |             |
| 505.3162644 |          |             |             |             |             |
| TUBA3FP     | TUBA3FP  | 11.71371313 | 14.21827756 | 47.32135491 |             |
| 26.39711829 |          |             |             |             |             |
| MIR3138     | MIR3138  | 0           | 0           | 1.785711506 | 0           |
| ZFAS1       | ZFAS1    | 1342.391525 | 943.484275  | 2439.281917 |             |
| 1788.404764 |          |             |             |             |             |
| DOCK3       | DOCK3    | 133.5363297 | 166.5569657 | 245.5353321 |             |
| 220.6044886 |          |             |             |             |             |
| CDC42EP4    | CDC42EP4 |             | 45.68348122 | 29.45214637 |             |
| 77.67845051 |          | 42.42394011 |             |             |             |
| LIG4        | LIG4     | 1101.089035 | 989.1858814 | 737.498852  |             |
| 1429.215405 |          |             |             |             |             |
| NCOA6       | NCOA6    | 2334.543028 | 1556.901392 | 1896.425619 |             |
| 2311.633359 |          |             |             |             |             |
| PSD3        | PSD3     | 32.79839678 | 18.28064257 | 0           | 19.79783872 |
| HIBCH       | HIBCH    | 1985.474376 | 3415.433387 | 1663.390268 |             |
| 2046.719422 |          |             |             |             |             |
| BAI3        | BAI3     | 0           | 0           | 2.678567259 | 1.885508449 |
| TBC1D25     | TBC1D25  | 1488.812939 | 1749.863731 | 1871.425658 |             |
| 1715.812689 |          |             |             |             |             |
| OAS2        | OAS2     | 14672.59707 | 18571.10167 | 18866.93492 |             |
| 15600.69691 |          |             |             |             |             |
| NIPA2       | NIPA2    | 7693.566787 | 8257.772487 | 7472.309797 |             |
| 7475.098248 |          |             |             |             |             |
| KCNIP2      | KCNIP2   | 14.05645576 | 15.23386881 | 33.03566286 |             |
| 8.484788022 |          |             |             |             |             |
| SLC46A1     | SLC46A1  | 846.9014596 | 756.6154843 | 667.8561033 |             |
| 794.7418114 |          |             |             |             |             |
| MAL2        | MAL2     | 0           | 0           | 16.07140355 | 0           |
| CSMD1       | CSMD1    | 0           | 0           | 8.035701777 | 0           |
| LDHAL6A     | LDHAL6A  | 24.59879758 | 9.140321286 | 75.89273901 |             |
| 34.88190631 |          |             |             |             |             |



|             |             |             |             |             |   |
|-------------|-------------|-------------|-------------|-------------|---|
| ZAP70       | ZAP70       | 13845.60893 | 10772.37643 | 6962.489162 |   |
| 8497.986582 |             |             |             |             |   |
| HTR6        | HTR6        | 9.370970508 | 1.015591254 | 20.53568232 |   |
| 4.713771124 |             |             |             |             |   |
| PSMB10      | PSMB10      | 14380.92562 | 18089.71142 | 13883.0141  |   |
| 14734.30578 |             |             |             |             |   |
| ANP32C      | ANP32C      | 3.51411394  | 1.015591254 | 0.892855753 |   |
| 0.942754225 |             |             |             |             |   |
| PARL        | PARL        | 4168.910505 | 5782.776601 | 3975.886668 |   |
| 3883.204652 |             |             |             |             |   |
| BTF3        | BTF3        | 14769.82089 | 16496.24874 | 13037.47971 |   |
| 14779.55798 |             |             |             |             |   |
| SIL1        | SIL1        | 1138.572917 | 1424.874529 | 902.6771663 |   |
| 907.8723184 |             |             |             |             |   |
| ZBED5       | ZBED5       | 1874.194102 | 1344.64282  | 1945.532686 |   |
| 2540.722636 |             |             |             |             |   |
| GREB1L      | GREB1L      | 5.856856567 | 8.124730032 | 13.3928363  |   |
| 2.828262674 |             |             |             |             |   |
| HTATSF1     | HTATSF1     | 5889.654964 | 9082.432585 | 6048.204871 |   |
| 5826.221109 |             |             |             |             |   |
| C11orf21    | C11orf21    |             | 589.1997707 | 558.5751897 |   |
| 274.9995719 | 323.3646991 |             |             |             |   |
| PDE7B       | PDE7B       | 1036.663612 | 722.0853816 | 124.9998054 |   |
| 418.5828758 |             |             |             |             |   |
| POMGNT2     | POMGNT2     | 776.6191808 | 1397.453566 | 1228.569516 |   |
| 1019.117317 |             |             |             |             |   |
| KDM2B       | KDM2B       | 2687.125793 | 1038.949853 | 1030.355539 |   |
| 1070.968799 |             |             |             |             |   |
| JAM3        | JAM3        | 281.1291152 | 227.4924409 | 762.4988131 |   |
| 588.2786362 |             |             |             |             |   |
| PRAM1       | PRAM1       | 9.370970508 | 9.140321286 | 3.571423012 | 0 |
| SLC41A2     | SLC41A2     | 473.2340106 | 291.4746899 | 152.6783338 |   |
| 341.2770293 |             |             |             |             |   |
| SLC24A2     | SLC24A2     | 0           | 0.892855753 | 0.942754225 |   |
| ZXDA        | ZXDA        | 147.5927855 | 132.026863  | 368.749426  |   |
| 364.845885  |             |             |             |             |   |
| ZP3         | ZP3         | 154.6210134 | 47.73278894 | 103.5712674 |   |
| 159.325464  |             |             |             |             |   |
| TMEM251     | TMEM251     | 639.5687371 | 880.5176173 | 1215.17668  |   |
| 1037.029647 |             |             |             |             |   |
| C21orf49    | C21orf49    |             | 35.1411394  | 41.63924142 |   |
| 108.9284019 | 102.7602105 |             |             |             |   |
| PART1       | PART1       | 1.171371313 | 0           | 2.678567259 | 0 |
| CTNNA3      | CTNNA3      | 0           | 0.892855753 | 0.942754225 |   |
| KPNA1       | KPNA1       | 6293.778067 | 8746.27188  | 7353.559982 |   |
| 6729.379656 |             |             |             |             |   |
| CENPT       | CENPT       | 2517.276953 | 2282.033548 | 2041.068251 |   |
| 2390.824714 |             |             |             |             |   |
| PPIP5K2     | PPIP5K2     | 4714.769537 | 3624.645186 | 3870.529689 |   |
| 4207.512105 |             |             |             |             |   |

|             |             |             |               |               |
|-------------|-------------|-------------|---------------|---------------|
| KLF12       | KLF12       | 654.7965642 | 437.7198305   | 976.7841938   |
| 1420.730617 |             |             |               |               |
| MEPCE       | MEPCE       | 900.7845401 | 506.7800358   | 553.5705669   |
| 609.9619834 |             |             |               |               |
| COL9A2      | COL9A2      | 980.4377894 | 1346.674003   | 670.5346705   |
| 1005.918758 |             |             |               |               |
| CA5A        | CA5A        | 3.51411394  | 1.015591254   | 0 0           |
| PSMC1       | PSMC1       | 9563.075403 | 14585.92159   | 7565.166795   |
| 7992.670317 |             |             |               |               |
| OLA1        | OLA1        | 3675.763182 | 4144.627908   | 2854.459842   |
| 3086.577332 |             |             |               |               |
| RSBN1       | RSBN1       | 1615.321041 | 1423.858938   | 2687.495817   |
| 2159.849929 |             |             |               |               |
| SERF1A      | SERF1A      | 30.45565415 | 32.49892013   | 53.57134518   |
| 32.05364364 |             |             |               |               |
| PGM5        | PGM5        | 0 0         | 0 0.942754225 |               |
| ZNF148      | ZNF148      | 3139.27512  | 3006.150112   | 4288.386182   |
| 4224.481681 |             |             |               |               |
| NAGPA       | NAGPA       | 1002.693844 | 1713.302446   | 1736.60444    |
| 1181.271044 |             |             |               |               |
| BIRC6       | BIRC6       | 7014.171425 | 3916.119876   | 4011.600898   |
| 4919.291545 |             |             |               |               |
| MAN1C1      | MAN1C1      | 696.9659315 | 3360.59146    | 3694.637106   |
| 2646.311109 |             |             |               |               |
| GJA9        | GJA9        | 11.71371313 | 12.18709505   | 16.96425931   |
| 5.656525348 |             |             |               |               |
| ILKAP       | ILKAP       | 3487.1724   | 4267.51445    | 3249.994941   |
| 3212.906398 |             |             |               |               |
| ZNF23       | ZNF23       | 424.0364155 | 473.2655244   | 812.4987353   |
| 717.435965  |             |             |               |               |
| SMG1        | SMG1        | 3723.789405 | 1892.046506   | 3227.673547   |
| 2914.053309 |             |             |               |               |
| MAN1B1      | MAN1B1      | 1686.774691 | 2148.991094   | 2766.067123   |
| 2272.980436 |             |             |               |               |
| HDHD2       | HDHD2       | 2407.168049 | 2484.136207   | 1447.319176   |
| 2026.921583 |             |             |               |               |
| PNMAL2      | PNMAL2      | 0 0         | 69.64274874   | 42.42394011   |
| SLC12A5     | SLC12A5     | 3.51411394  | 2.031182508   | 1.785711506   |
| 1.885508449 |             |             |               |               |
| FOXRED2     | FOXRED2     | 1536.839163 | 1789.47179    | 1179.46245    |
| 998.376724  |             |             |               |               |
| AGK         | AGK         | 6675.645115 | 8438.54773    | 3775.88698    |
| 4552.560151 |             |             |               |               |
| LOC554223   | LOC554223   |             | 0 0           | 0 1.885508449 |
| PLEKHA5     | PLEKHA5     | 132.3649584 | 223.4300759   | 352.6780224   |
| 211.1769463 |             |             |               |               |
| GSS         | GSS         | 4920.930888 | 6567.82864    | 3745.529884   |
| 4777.878411 |             |             |               |               |
| ARHGAP19    | ARHGAP19    |             | 5254.771712   | 4582.347738   |
| 2317.853535 | 3283.612965 |             |               |               |

|             |             |             |             |             |             |
|-------------|-------------|-------------|-------------|-------------|-------------|
| ACTR3C      | ACTR3C      | 371.3247064 | 456.0004731 | 241.9639091 |             |
| 316.7654195 |             |             |             |             |             |
| RP9P        | RP9P        | 32.79839678 | 43.67042392 | 58.9284797  |             |
| 49.96597391 |             |             |             |             |             |
| IL10RA      | IL10RA      | 21161.99415 | 29742.60547 | 19185.68442 |             |
| 19931.70982 |             |             |             |             |             |
| LOC146880   | LOC146880   |             | 209.6754651 | 105.6214904 |             |
| 120.5355267 | 81.07686333 |             |             |             |             |
| LINC00924   | LINC00924   |             | 0           | 1.785711506 | 0           |
| THUMPD3-AS1 | THUMPD3-AS1 |             | 495.4900656 | 471.2343419 |             |
| 749.1059768 | 580.7366024 |             |             |             |             |
| GFOD2       | GFOD2       | 965.2099623 | 1395.422383 | 1498.211954 |             |
| 1081.339096 |             |             |             |             |             |
| SOX30       | SOX30       | 17.5705697  | 32.49892013 | 18.74997081 |             |
| 48.08046546 |             |             |             |             |             |
| CLCC1       | CLCC1       | 2113.153849 | 2399.842133 | 1993.746897 |             |
| 1831.771459 |             |             |             |             |             |
| ADRBK2      | ADRBK2      | 2564.131805 | 2476.011477 | 529.4634615 |             |
| 806.9976164 |             |             |             |             |             |
| IRF2BP1     | IRF2BP1     | 309.2420268 | 176.7128782 | 389.2851083 |             |
| 226.2610139 |             |             |             |             |             |
| UTRN        | UTRN        | 2712.895962 | 2276.955592 | 2771.424257 |             |
| 2983.817121 |             |             |             |             |             |
| EPHX1       | EPHX1       | 96.0524477  | 48.74838019 | 104.4641231 |             |
| 81.07686333 |             |             |             |             |             |
| KBTBD8      | KBTBD8      | 1276.794732 | 1536.589567 | 1220.533814 |             |
| 929.5556656 |             |             |             |             |             |
| RBM23       | RBM23       | 6991.91537  | 9437.889524 | 9564.270826 |             |
| 7625.938924 |             |             |             |             |             |
| UBE2G1      | UBE2G1      | 11160.82587 | 7997.781126 | 5644.634071 |             |
| 8048.292816 |             |             |             |             |             |
| MAP1LC3B    | MAP1LC3B    |             | 10264.72682 | 13035.11375 |             |
| 15347.29754 | 11925.84094 |             |             |             |             |
| PER2        | PER2        | 360.7823645 | 339.2074789 | 431.2493287 |             |
| 315.8226653 |             |             |             |             |             |
| CDK5RAP3    | CDK5RAP3    |             | 4180.624218 | 4665.626221 |             |
| 4029.458013 | 4300.844773 |             |             |             |             |
| IMPDH2      | IMPDH2      | 6258.636928 | 7736.774173 | 6874.989298 |             |
| 7718.328838 |             |             |             |             |             |
| PSME2       | PSME2       | 26667.43932 | 37046.73777 | 29915.13201 |             |
| 26817.58668 |             |             |             |             |             |
| RORB        | RORB        | 2.342742627 | 3.046773762 | 0           | 2.828262674 |
| CCNI        | CCNI        | 7672.482103 | 5600.985766 | 6206.240339 |             |
| 6950.926899 |             |             |             |             |             |
| IFT88       | IFT88       | 431.0646434 | 491.546167  | 600.8919218 |             |
| 487.4039342 |             |             |             |             |             |
| SLC25A51    | SLC25A51    |             | 548.2017747 | 712.9450603 |             |
| 619.6418926 | 629.7598221 |             |             |             |             |
| SLC52A3     | SLC52A3     | 0           | 2.031182508 | 0           |             |
| PVRL4       | PVRL4       | 5.856856567 | 1.015591254 | 10.71426904 |             |

|             |             |             |             |             |
|-------------|-------------|-------------|-------------|-------------|
| 18.85508449 |             |             |             |             |
| CEP83       | CEP83       | 476.7481246 | 500.6864882 | 408.9279349 |
| 492.1177053 |             |             |             |             |
| ACSL4       | ACSL4       | 4193.509302 | 4152.752638 | 3245.530662 |
| 3627.718257 |             |             |             |             |
| NPAP1       | NPAP1       | 0           | 1.785711506 | 0           |
| SLC16A6     | SLC16A6     | 230.7601488 | 72.10697904 | 103.5712674 |
| 70.70656685 |             |             |             |             |
| ZNF33B      | ZNF33B      | 576.3146862 | 450.9225168 | 817.8558698 |
| 954.0672754 |             |             |             |             |
| ZNF274      | ZNF274      | 1671.546864 | 2004.777135 | 4583.921436 |
| 3284.555719 |             |             |             |             |
| SLMAP       | SLMAP       | 2736.323388 | 2508.510398 | 2765.174267 |
| 2588.803101 |             |             |             |             |
| ARIH1       | ARIH1       | 2381.39788  | 1120.197153 | 1687.497373 |
| 2080.658574 |             |             |             |             |
| KCNQ4       | KCNQ4       | 8.199599194 | 22.34300759 | 2.678567259 |
| 6.599279573 |             |             |             |             |
| LATS1       | LATS1       | 1816.796907 | 1584.322356 | 2499.103253 |
| 2276.751453 |             |             |             |             |
| PBK         | PBK         | 3053.765014 | 3305.749532 | 832.1415618 |
| 1609.281462 |             |             |             |             |
| TOMM70A     | TOMM70A     | 3278.668306 | 3768.859144 | 3707.137087 |
| 4462.9985   |             |             |             |             |
| GLIPR1      | GLIPR1      | 5373.080215 | 4322.356377 | 2796.424218 |
| 4672.289938 |             |             |             |             |
| KATNA1      | KATNA1      | 2242.004694 | 2741.080795 | 1862.497101 |
| 2117.425989 |             |             |             |             |
| TSFM        | TSFM        | 2511.420096 | 4039.006417 | 2721.424335 |
| 2289.007258 |             |             |             |             |
| SOS2        | SOS2        | 1651.633552 | 1196.366497 | 3394.637573 |
| 2941.393181 |             |             |             |             |
| TMEM222     | TMEM222     | 2621.529    | 3391.059197 | 3765.172711 |
| 2999.843943 |             |             |             |             |
| IQUB        | IQUB        | 1.171371313 | 1.015591254 | 6.249990271 |
| 2.828262674 |             |             |             |             |
| SPSB3       | SPSB3       | 2338.057142 | 2078.915297 | 3655.351453 |
| 3048.867163 |             |             |             |             |
| EID3        | EID3        | 363.1251072 | 347.3322089 | 302.6781003 |
| 286.5972843 |             |             |             |             |
| LIPJ        | LIPJ        | 0           | 12.49998054 | 0           |
| AWAT1       | AWAT1       | 0           | 0           | 0.942754225 |
| MPST        | MPST        | 1538.010535 | 2425.231915 | 441.9635978 |
| 673.1265164 |             |             |             |             |
| MIR548AZ    | MIR548AZ    |             | 1.171371313 | 4.062365016 |
| 4.464278765 | 1.885508449 |             |             |             |
| FAM53A      | FAM53A      | 40.99799597 | 45.70160643 | 29.46423985 |
| 76.3630922  |             |             |             |             |
| CCDC50      | CCDC50      | 3271.640078 | 1179.101446 | 684.8203626 |
| 1465.982819 |             |             |             |             |

|             |             |             |             |             |             |
|-------------|-------------|-------------|-------------|-------------|-------------|
| KRTCAP3     | KRTCAP3     | 86.6814772  | 46.71719769 | 204.4639674 |             |
| 166.8674978 |             |             |             |             |             |
| AKR1A1      | AKR1A1      | 4836.592153 | 7453.424213 | 5301.777461 |             |
| 5224.743913 |             |             |             |             |             |
| LURAP1L     | LURAP1L     | 1.171371313 | 0           | 0           |             |
| FITM1       | FITM1       | 9.370970508 | 2.031182508 | 17.85711506 |             |
| 7.542033798 |             |             |             |             |             |
| PMP22       | PMP22       | 2.342742627 | 26.40537261 | 24.99996108 | 0           |
| NAGS        | NAGS        | 42.16936728 | 56.87311023 | 233.9282073 |             |
| 94.27542247 |             |             |             |             |             |
| SP7         | SP7         | 8.199599194 | 0           | 8.035701777 | 12.25580492 |
| PPIH        | PPIH        | 2127.210305 | 2282.033548 | 1841.961419 |             |
| 1777.091714 |             |             |             |             |             |
| SLC30A9     | SLC30A9     | 5320.368506 | 5004.8337   | 3807.136931 |             |
| 4539.361592 |             |             |             |             |             |
| HMG20B      | HMG20B      | 3317.32356  | 3722.141946 | 2861.602688 |             |
| 2944.221444 |             |             |             |             |             |
| TIMM17A     | TIMM17A     | 6036.076378 | 7557.014521 | 4788.385404 |             |
| 4650.606591 |             |             |             |             |             |
| RALB        | RALB        | 5911.911019 | 11162.36347 | 5679.455445 |             |
| 5017.337984 |             |             |             |             |             |
| KCNJ4       | KCNJ4       | 0           | 0           | 0.942754225 |             |
| PTPRN       | PTPRN       | 0           | 0           | 7.542033798 |             |
| ACTR3       | ACTR3       | 75653.01628 | 81978.52603 | 35052.62401 |             |
| 49170.28934 |             |             |             |             |             |
| TESK2       | TESK2       | 357.2682506 | 374.7531727 | 1264.283746 |             |
| 863.5628698 |             |             |             |             |             |
| APTX        | APTX        | 2659.012882 | 3747.531727 | 2483.924705 |             |
| 2422.878358 |             |             |             |             |             |
| CYP2R1      | CYP2R1      | 429.893272  | 362.5660777 | 637.4990077 |             |
| 554.3394841 |             |             |             |             |             |
| HNRNPK      | HNRNPK      | 74679.60672 | 60589.15863 | 57647.23169 |             |
| 57552.31716 |             |             |             |             |             |
| GPR132      | GPR132      | 2776.150013 | 3749.56291  | 2864.281256 |             |
| 2398.366748 |             |             |             |             |             |
| MTRNR2L9    | MTRNR2L9    |             | 2.342742627 | 2.031182508 |             |
| 1.785711506 | 1.885508449 |             |             |             |             |
| LYPLA1      | LYPLA1      | 8679.861433 | 8785.879939 | 4751.778318 |             |
| 6238.204705 |             |             |             |             |             |
| TMEM145     | TMEM145     | 0           | 3.046773762 | 8.92855753  | 3.771016899 |
| CSNK2B      | CSNK2B      | 735.6211849 | 913.0165374 | 758.0345343 |             |
| 858.8490987 |             |             |             |             |             |
| C7orf76     | C7orf76     | 7.028227881 | 0           | 1.785711506 | 0           |
| ZMYM6NB     | ZMYM6NB     | 2732.809274 | 2408.982455 | 3211.602144 |             |
| 3935.998888 |             |             |             |             |             |
| CHAMP1      | CHAMP1      | 1197.141482 | 500.6864882 | 516.963481  |             |
| 470.4343581 |             |             |             |             |             |
| ZBED6       | ZBED6       | 134.707701  | 68.04461402 | 55.35705669 |             |
| 84.84788022 |             |             |             |             |             |
| NARS2       | NARS2       | 1520.439965 | 1946.888434 | 1684.818806 |             |

|             |         |             |             |             |
|-------------|---------|-------------|-------------|-------------|
| 1709.213409 |         |             |             |             |
| BEST2       | BEST2   | 1.171371313 | 0           | 0           |
| MFAP3L      | MFAP3L  | 17.5705697  | 14.21827756 | 63.39275847 |
| 58.45076193 |         |             |             |             |
| ZNF500      | ZNF500  | 662.9961634 | 599.1988399 | 887.4986185 |
| 864.5056241 |         |             |             |             |
| LANCL2      | LANCL2  | 1340.048783 | 1741.739001 | 853.5700999 |
| 1179.385535 |         |             |             |             |
| TEFM        | TEFM    | 1165.514457 | 1121.212744 | 955.3556557 |
| 1206.725408 |         |             |             |             |
| CUZD1       | CUZD1   | 90.19559114 | 57.88870148 | 90.17843106 |
| 81.07686333 |         |             |             |             |
| ATG101      | ATG101  | 2080.355453 | 2691.316823 | 2683.924394 |
| 2305.034079 |         |             |             |             |
| VPS28       | VPS28   | 3305.609847 | 4107.051031 | 4232.136269 |
| 4136.805538 |         |             |             |             |
| RINT1       | RINT1   | 2820.662123 | 3014.274842 | 1924.997004 |
| 2722.674201 |         |             |             |             |
| FDPSP2      | FDPSP2  | 53.88308042 | 33.51451138 | 54.46420093 |
| 36.76741476 |         |             |             |             |
| ZNF37BP     | ZNF37BP | 493.147323  | 200.071477  | 914.2842911 |
| 838.1085058 |         |             |             |             |
| EME2        | EME2    | 87.85284851 | 20.31182508 | 16.96425931 |
| 48.08046546 |         |             |             |             |
| SNORA78     | SNORA78 | 28.11291152 | 9.140321286 | 46.42849916 |
| 28.28262674 |         |             |             |             |
| SNORA77     | SNORA77 | 8.199599194 | 7.109138778 | 2.678567259 |
| 3.771016899 |         |             |             |             |
| ZDHHC2      | ZDHHC2  | 875.0143712 | 472.2499331 | 658.9275457 |
| 849.4215565 |         |             |             |             |
| TCP10L      | TCP10L  | 50.36896648 | 80.23170907 | 17.85711506 |
| 65.99279573 |         |             |             |             |
| C18orf8     | C18orf8 | 4609.346118 | 5185.608943 | 6066.061986 |
| 4710.000107 |         |             |             |             |
| C2CD2L      | C2CD2L  | 1430.244374 | 1647.289014 | 1495.533386 |
| 1415.074091 |         |             |             |             |
| COLCA2      | COLCA2  | 0           | 0           | 12.25580492 |
| MIR3134     | MIR3134 | 18.74194102 | 12.18709505 | 11.60712479 |
| 14.14131337 |         |             |             |             |
| CCDC112     | CCDC112 | 35.1411394  | 43.67042392 | 149.9997665 |
| 167.810252  |         |             |             |             |
| TRPM5       | TRPM5   | 5.856856567 | 0           | 0           |
| MORC2       | MORC2   | 2466.907986 | 2361.249666 | 1741.961574 |
| 1761.064892 |         |             |             |             |
| NUDT22      | NUDT22  | 2384.911994 | 2792.875949 | 1636.604595 |
| 2088.200608 |         |             |             |             |
| PPIL1       | PPIL1   | 3668.734954 | 3823.701072 | 2410.710533 |
| 3356.20504  |         |             |             |             |
| ELK3        | ELK3    | 3288.039277 | 2206.879795 | 1858.925678 |
| 2506.783484 |         |             |             |             |

|             |             |             |             |             |             |
|-------------|-------------|-------------|-------------|-------------|-------------|
| COL24A1     | COL24A1     | 0           | 11.17150379 | 4.464278765 | 1.885508449 |
| HEMK1       | HEMK1       | 876.1857425 | 1345.658412 | 1387.49784  |             |
| 1301.943584 |             |             |             |             |             |
| TTF1        | TTF1        | 1270.937875 | 1330.424543 | 1073.212615 |             |
| 1208.610916 |             |             |             |             |             |
| RASSF3      | RASSF3      | 297.5283136 | 122.8865417 | 107.1426904 |             |
| 104.6457189 |             |             |             |             |             |
| TMPRSS11F   | TMPRSS11F   | 0           | 0           | 9.821413283 | 0           |
| C9orf78     | C9orf78     | 7761.506323 | 9916.233005 | 9807.127591 |             |
| 9123.975387 |             |             |             |             |             |
| IL23A       | IL23A       | 839.8732318 | 1311.128309 | 417.8564924 |             |
| 460.0640617 |             |             |             |             |             |
| CERCAM      | CERCAM      | 18.74194102 | 55.85751897 | 106.2498346 |             |
| 86.73338867 |             |             |             |             |             |
| FAM133B     | FAM133B     | 790.6756366 | 817.5509595 | 1020.534126 |             |
| 898.4447762 |             |             |             |             |             |
| SLC2A8      | SLC2A8      | 872.6716285 | 1122.228336 | 345.5351764 |             |
| 336.5632582 |             |             |             |             |             |
| SLC39A2     | SLC39A2     | 1.171371313 | 0           | 0           | 0           |
| BRD1        | BRD1        | 783.6474087 | 591.0741099 | 566.9634032 |             |
| 714.6077023 |             |             |             |             |             |
| LEPREL4     | LEPREL4     | 36.31251072 | 59.91988399 | 203.5711117 |             |
| 150.840676  |             |             |             |             |             |
| RNU11       | RNU11       | 3.51411394  | 9.140321286 | 9.821413283 |             |
| 8.484788022 |             |             |             |             |             |
| SNORD1C     | SNORD1C     | 0           | 3.046773762 | 4.464278765 | 10.37029647 |
| SNORD1B     | SNORD1B     | 2.342742627 | 0           | 12.49998054 | 6.599279573 |
| NUTM2G      | NUTM2G      | 35.1411394  | 9.140321286 | 66.96418148 |             |
| 18.85508449 |             |             |             |             |             |
| AGBL5-AS1   | AGBL5-AS1   |             | 1.171371313 | 4.062365016 |             |
| 3.571423012 | 4.713771124 |             |             |             |             |
| PRNCR1      | PRNCR1      | 1.171371313 | 2.031182508 | 2.678567259 |             |
| 2.828262674 |             |             |             |             |             |
| PVRL1       | PVRL1       | 5.856856567 | 18.28064257 | 18.74997081 |             |
| 9.427542247 |             |             |             |             |             |
| PPP1R37     | PPP1R37     | 137.0504437 | 46.71719769 | 56.24991244 |             |
| 61.27902461 |             |             |             |             |             |
| USP3        | USP3        | 3929.950757 | 3378.872102 | 4397.314584 |             |
| 4513.907228 |             |             |             |             |             |
| SNAR-G2     | SNAR-G2     | 1.171371313 | 1.015591254 | 0           | 0           |
| STOML1      | STOML1      | 556.4013739 | 850.0498796 | 839.2844078 |             |
| 506.2590187 |             |             |             |             |             |
| ST14        | ST14        | 0           | 6.093547524 | 130.3569399 | 0           |
| LOC441242   | LOC441242   |             | 226.0746635 | 241.7107185 |             |
| 262.4995914 | 310.1661399 |             |             |             |             |
| TGFB1I1     | TGFB1I1     | 45.68348122 | 12.18709505 | 15.1785478  |             |
| 77.30584643 |             |             |             |             |             |
| ZNF286B     | ZNF286B     | 66.76816487 | 70.07579653 | 132.1426514 |             |
| 109.3594901 |             |             |             |             |             |
| PTCHD2      | PTCHD2      | 12.88508445 | 7.109138778 | 22.32139383 |             |

|              |              |             |             |             |  |             |
|--------------|--------------|-------------|-------------|-------------|--|-------------|
| 9.427542247  |              |             |             |             |  |             |
| TM2D1        | TM2D1        | 1413.845175 | 1273.551433 | 1312.497957 |  |             |
| 1364.165363  |              |             |             |             |  |             |
| ESF1         | ESF1         | 878.5284851 | 1053.16813  | 1366.962158 |  |             |
| 1341.539262  |              |             |             |             |  |             |
| FAM206A      | FAM206A      | 1359.962095 | 1576.197626 | 1955.354099 |  |             |
| 1761.064892  |              |             |             |             |  |             |
| ZAK          | ZAK          | 2777.321384 | 2535.931361 | 596.427643  |  |             |
| 1175.614518  |              |             |             |             |  |             |
| MIR7113      | MIR7113      | 59.73993699 | 58.90429273 | 137.499786  |  |             |
| 110.3022443  |              |             |             |             |  |             |
| MARVELD2     | MARVELD2     |             | 4.685485254 | 19.29623383 |  |             |
| 121.4283824  |              | 22.62610139 |             |             |  |             |
| REV1         | REV1         | 2127.210305 | 1805.72125  | 2849.102708 |  |             |
| 2702.876362  |              |             |             |             |  |             |
| SEC31B       | SEC31B       | 1487.641568 | 854.1122447 | 684.8203626 |  |             |
| 1043.628927  |              |             |             |             |  |             |
| ZBTB2        | ZBTB2        | 2643.785054 | 2689.285641 | 3458.923187 |  |             |
| 3016.813519  |              |             |             |             |  |             |
| TMOD3        | TMOD3        | 8381.161748 | 7497.094637 | 4589.278571 |  |             |
| 6588.909277  |              |             |             |             |  |             |
| LRRC17       | LRRC17       | 5.856856567 | 3.046773762 | 17.85711506 |  | 0           |
| NT5DC3       | NT5DC3       | 290.5000857 | 192.9623383 | 310.7138021 |  |             |
| 315.8226653  |              |             |             |             |  |             |
| HCG2040054   | HCG2040054   |             | 0           | 4.464278765 |  | 0           |
| VPS33B       | VPS33B       | 1441.958087 | 1568.072896 | 1916.068446 |  |             |
| 1599.853919  |              |             |             |             |  |             |
| ECEL1        | ECEL1        | 3.51411394  | 4.062365016 | 56.24991244 |  |             |
| 86.73338867  |              |             |             |             |  |             |
| KIR2DS2      | KIR2DS2      | 0           | 0           | 9.427542247 |  |             |
| ADRB1        | ADRB1        | 0           | 0           | 2.678567259 |  |             |
| FLCN         | FLCN         | 753.1917546 | 762.7090318 | 788.3916299 |  |             |
| 800.3983368  |              |             |             |             |  |             |
| CCRN4L       | CCRN4L       | 92.53833376 | 77.18493531 | 59.82133545 |  |             |
| 70.70656685  |              |             |             |             |  |             |
| ZNF197       | ZNF197       | 550.5445173 | 592.0897011 | 690.1774971 |  |             |
| 823.0244382  |              |             |             |             |  |             |
| DGKE         | DGKE         | 1302.564901 | 1040.981035 | 1165.176758 |  |             |
| 1477.29587   |              |             |             |             |  |             |
| LOC102724084 | LOC102724084 |             | 2.342742627 | 0           |  | 0           |
| 0.942754225  |              |             |             |             |  |             |
| PPIAL4B      | PPIAL4B      | 0           | 0           | 0.892855753 |  | 0.942754225 |
| SH3PXD2B     | SH3PXD2B     |             | 1.171371313 | 0           |  | 0           |
| DPH1         | DPH1         | 5138.805952 | 7238.118868 | 4831.24248  |  |             |
| 4643.064557  |              |             |             |             |  |             |
| ZHX1-C8orf76 | ZHX1-C8orf76 |             | 1648.119438 | 2003.761544 |  |             |
| 1291.069419  |              | 1402.818286 |             |             |  |             |
| ETV4         | ETV4         | 69.11090749 | 129.9956805 | 92.85699832 |  |             |
| 77.30584643  |              |             |             |             |  |             |
| SRD5A3-AS1   | SRD5A3-AS1   |             | 8.199599194 | 16.24946006 |  |             |



|               |               |             |             |             |
|---------------|---------------|-------------|-------------|-------------|
| 24.10710533   | 2.828262674   |             |             |             |
| C1QTNF3-AMACR | C1QTNF3-AMACR | 474.405382  | 696.6956003 |             |
| 777.6773609   | 773.0584643   |             |             |             |
| MIR941-2      | MIR941-2      | 0           | 1.015591254 | 0           |
| 0.942754225   |               |             |             |             |
| PPP1R3C       | PPP1R3C       | 1.171371313 | 0           | 0           |
| ASPA          | ASPA          | 0           | 0           | 6.249990271 |
| TMED5         | TMED5         | 4568.348122 | 4321.340786 | 4289.279038 |
| 4044.415624   |               |             |             |             |
| MIR9-1        | MIR9-1        | 0           | 0           | 1.785711506 |
| ROCK1P1       | ROCK1P1       | 4.685485254 | 2.031182508 | 0.942754225 |
| 27.33987252   |               |             |             | 4.464278765 |
| LOC100506747  | LOC100506747  |             | 17.5705697  | 35.54569389 |
| 41.96422039   | 12.25580492   |             |             |             |
| MIR146A       | MIR146A       | 29.28428284 | 17.26505132 | 6.249990271 |
| 7.542033798   |               |             |             |             |
| MIR152        | MIR152        | 1.171371313 | 0           | 0           |
| MIR142        | MIR142        | 115.96576   | 25.38978135 | 37.49994163 |
| 69.76381263   |               |             |             |             |
| MIR133A1      | MIR133A1      | 0           | 0           | 0           |
| DUSP6         | DUSP6         | 2348.599483 | 8670.102536 | 941.9628194 |
| 1898.707009   |               |             |             | 2.828262674 |
| GAP43         | GAP43         | 0           | 2.031182508 | 0           |
| GABRR2        | GABRR2        | 1.171371313 | 0           | 1.885508449 |
| CDKL2         | CDKL2         | 108.9375322 | 56.87311023 | 50.89277792 |
| 73.53482953   |               |             |             | 7.542033798 |
| RAG1          | RAG1          | 0           | 9.140321286 | 73.21417175 |
| IL6R          | IL6R          | 431.0646434 | 359.5193039 | 29.22538097 |
| 2365.37035    |               |             |             | 2427.674792 |
| GSTM1         | GSTM1         | 3101.791238 | 5.07795627  | 1.785711506 |
| 2885.770682   |               |             |             |             |
| VPS53         | VPS53         | 1210.026567 | 711.9294691 | 978.5699053 |
| 1172.786256   |               |             |             |             |
| PLAU          | PLAU          | 115.96576   | 357.4881214 | 272.3210047 |
| 102.7602105   |               |             |             |             |
| PLAG1         | PLAG1         | 93.70970508 | 79.21611782 | 378.5708393 |
| 322.4219449   |               |             |             |             |
| RASSF1        | RASSF1        | 4255.591982 | 5086.081    | 4115.172166 |
| 3776.673424   |               |             |             |             |
| PPP1R14C      | PPP1R14C      |             | 1.171371313 | 3.046773762 |
| 45.5356434    | 17.91233027   |             |             |             |
| SMKR1         | SMKR1         | 53.88308042 | 118.8241767 | 81.24987353 |
| 86.73338867   |               |             |             |             |
| C1QTNF9       | C1QTNF9       | 0           | 0           | 2.678567259 |
| SP6           | SP6           | 0           | 0           | 1.885508449 |
| DHH           | DHH           | 0           | 0           | 0           |
| CPNE5         | CPNE5         | 100.737933  | 158.4322356 | 13.19855915 |
| 81.07686333   |               |             |             | 0           |
| CETN3         | CETN3         | 1021.435785 | 1121.212744 | 11.60712479 |
| 1215.210196   |               |             |             | 1047.319798 |

|                 |              |             |             |             |             |
|-----------------|--------------|-------------|-------------|-------------|-------------|
| LOC101928943    | LOC101928943 | 0           | 1.015591254 | 0           |             |
| 2.828262674     |              |             |             |             |             |
| LOC101928812    | LOC101928812 | 23.42742627 |             | 21.32741634 |             |
| 49.10706642     | 23.56885562  |             |             |             |             |
| LOC101928894    | LOC101928894 | 0           | 0           | 0           | 0.942754225 |
| RFWD2 RFWD2     | 3934.636242  | 4663.595039 |             | 3927.672458 |             |
| 3942.598168     |              |             |             |             |             |
| ERCC6-PGBD3     | ERCC6-PGBD3  | 675.8812479 |             | 921.1412674 |             |
| 621.4276041     | 780.6004981  |             |             |             |             |
| MIR4489 MIR4489 | 2.342742627  | 1.015591254 |             | 5.357134518 |             |
| 6.599279573     |              |             |             |             |             |
| MIR4479 MIR4479 | 0 0          | 0           | 0.942754225 |             |             |
| MIR3689F        | MIR3689F     | 0           | 0           | 0.892855753 | 0           |
| MIR4485 MIR4485 | 1.171371313  | 0           | 0           | 0.942754225 |             |
| MIR4484 MIR4484 | 2.342742627  | 0           | 3.571423012 | 0           |             |
| MIR219B MIR219B | 0 0          | 0           | 1.885508449 |             |             |
| MIR4480 MIR4480 | 0 0          | 0           | 2.828262674 |             |             |
| MIR4473 MIR4473 | 3.51411394   | 4.062365016 |             | 2.678567259 |             |
| 0.942754225     |              |             |             |             |             |
| NELL1 NELL1     | 1.171371313  | 0           | 0           | 0           |             |
| TAX1BP3 TAX1BP3 | 2152.980474  | 2209.926569 |             | 1231.248083 |             |
| 1152.988417     |              |             |             |             |             |
| CXXC1 CXXC1     | 5861.542053  | 6850.163009 |             | 7217.845907 |             |
| 6097.734325     |              |             |             |             |             |
| MAPK9 MAPK9     | 3688.648266  | 3368.71619  |             | 2646.424452 |             |
| 3283.612965     |              |             |             |             |             |
| PLA2G4C PLA2G4C | 64.42542224  | 233.5859884 |             | 274.1067162 |             |
| 65.99279573     |              |             |             |             |             |
| SDHC SDHC       | 5443.362494  | 7362.021001 |             | 4382.136036 |             |
| 5946.89365      |              |             |             |             |             |
| MYE0V2 MYE0V2   | 3183.78723   | 3602.302178 |             | 2525.888925 |             |
| 2183.418784     |              |             |             |             |             |
| MCTP2 MCTP2     | 1194.79874   | 1109.025649 |             | 536.6063076 |             |
| 756.0888882     |              |             |             |             |             |
| LOC100131347    | LOC100131347 | 7.028227881 |             | 17.26505132 |             |
| 22.32139383     | 22.62610139  |             |             |             |             |
| PTPRG-AS1       | PTPRG-AS1    | 78.481878   |             | 66.01343151 |             |
| 47.32135491     | 19.79783872  |             |             |             |             |
| ARHGEF34P       | ARHGEF34P    | 51.54033779 |             | 51.79515396 |             |
| 44.64278765     | 41.48118589  |             |             |             |             |
| BMF BMF         | 323.2984825  | 140.1515931 |             | 401.7850889 |             |
| 247.9443611     |              |             |             |             |             |
| UNC13A UNC13A   | 1.171371313  | 2.031182508 |             | 0.892855753 | 0           |
| PUS7L PUS7L     | 1279.137474  | 1140.508978 |             | 1249.998054 |             |
| 1298.172567     |              |             |             |             |             |
| CCDC88C CCDC88C | 2941.313368  | 1517.293334 |             | 1716.068757 |             |
| 1967.528067     |              |             |             |             |             |
| SLC4A8 SLC4A8   | 127.6794732  | 272.1784561 |             | 64.28561422 |             |
| 98.04643937     |              |             |             |             |             |
| TAF11 TAF11     | 1874.194102  | 1655.413744 |             | 1132.141095 |             |

|             |            |             |             |             |             |  |
|-------------|------------|-------------|-------------|-------------|-------------|--|
| 1548.945191 |            |             |             |             |             |  |
| FAM157A     | FAM157A    | 5.856856567 | 0           | 3.571423012 | 18.85508449 |  |
| KIF3B       | KIF3B      | 1292.022559 | 990.2014727 | 1074.105471 |             |  |
| 1456.555277 |            |             |             |             |             |  |
| MIR1281     | MIR1281    | 16.39919839 | 4.062365016 | 8.035701777 |             |  |
| 7.542033798 |            |             |             |             |             |  |
| SPOCK2      | SPOCK2     | 23542.22066 | 24275.67775 | 17242.8303  |             |  |
| 21930.34878 |            |             |             |             |             |  |
| FOXJ2       | FOXJ2      | 2527.819294 | 1597.525043 | 3445.530351 |             |  |
| 2723.616955 |            |             |             |             |             |  |
| ST6GALNAC1  | ST6GALNAC1 |             | 158.1351273 | 144.2139581 |             |  |
| 231.24964   |            | 165.9247436 |             |             |             |  |
| MRPL19      | MRPL19     | 3571.511135 | 3852.137627 | 2425.889081 |             |  |
| 2650.082126 |            |             |             |             |             |  |
| DHCR24      | DHCR24     | 10291.66836 | 11832.6537  | 6921.417797 |             |  |
| 7262.978547 |            |             |             |             |             |  |
| TATDN2      | TATDN2     | 3271.640078 | 2576.555012 | 1908.032744 |             |  |
| 2517.15378  |            |             |             |             |             |  |
| FAM184A     | FAM184A    | 304.5565415 | 208.1962071 | 267.8567259 |             |  |
| 274.3414794 |            |             |             |             |             |  |
| KDM5A       | KDM5A      | 6754.126993 | 6543.45445  | 7273.202964 |             |  |
| 7444.930113 |            |             |             |             |             |  |
| HCCS        | HCCS       | 2103.782879 | 2864.982928 | 2295.532141 |             |  |
| 2077.830311 |            |             |             |             |             |  |
| TAS2R30     | TAS2R30    | 1.171371313 | 2.031182508 | 2.678567259 |             |  |
| 2.828262674 |            |             |             |             |             |  |
| CC2D2B      | CC2D2B     | 5.856856567 | 3.046773762 | 15.1785478  |             |  |
| 4.713771124 |            |             |             |             |             |  |
| CRMP1       | CRMP1      | 12.88508445 | 1.015591254 | 0           | 19.79783872 |  |
| IDI2        | IDI2       | 44.51210991 | 35.54569389 | 32.14280711 |             |  |
| 72.5920753  |            |             |             |             |             |  |
| GATM        | GATM       | 31.62702546 | 30.46773762 | 13.3928363  |             |  |
| 29.22538097 |            |             |             |             |             |  |
| DIMT1       | DIMT1      | 3009.252904 | 3340.279635 | 3302.67343  |             |  |
| 3330.750676 |            |             |             |             |             |  |
| PTGR2       | PTGR2      | 247.1593471 | 118.8241767 | 263.3924471 |             |  |
| 333.7349955 |            |             |             |             |             |  |
| PRKAR1B     | PRKAR1B    | 787.1615226 | 1267.457885 | 702.6774776 |             |  |
| 625.046051  |            |             |             |             |             |  |
| HSPA6       | HSPA6      | 4.685485254 | 10.15591254 | 615.1776138 | 0           |  |
| HSPA4       | HSPA4      | 12595.75573 | 14577.79686 | 11376.76801 |             |  |
| 11168.8093  |            |             |             |             |             |  |
| COX18       | COX18      | 625.5122814 | 585.9961536 | 469.6421261 |             |  |
| 642.9583813 |            |             |             |             |             |  |
| CCDC107     | CCDC107    | 2022.958258 | 2269.846453 | 1710.711623 |             |  |
| 1850.626543 |            |             |             |             |             |  |
| ARSK        | ARSK       | 312.7561407 | 238.6639447 | 451.785011  |             |  |
| 437.4379603 |            |             |             |             |             |  |
| CPXM2       | CPXM2      | 1.171371313 | 0           | 0           | 0           |  |
| CCDC43      | CCDC43     | 2253.718407 | 2562.336734 | 1779.461516 |             |  |

|             |             |             |             |             |             |
|-------------|-------------|-------------|-------------|-------------|-------------|
| 1804.431586 |             |             |             |             |             |
| APOBEC4     | APOBEC4     | 1.171371313 | 2.031182508 | 0           | 2.828262674 |
| PPAPDC2     | PPAPDC2     | 517.7461205 | 542.3257297 | 904.4628778 |             |
| 941.8114705 |             |             |             |             |             |
| CATIP       | CATIP       | 2.342742627 | 1.015591254 | 51.78563368 |             |
| 9.427542247 |             |             |             |             |             |
| ZNF700      | ZNF700      | 695.7945602 | 600.2144311 | 1192.855286 |             |
| 1330.226211 |             |             |             |             |             |
| FRMD6-AS1   | FRMD6-AS1   |             | 23.42742627 | 16.24946006 |             |
| 47.32135491 | 18.85508449 |             |             |             |             |
| MGAT4B      | MGAT4B      | 2519.619695 | 3274.266203 | 2916.959745 |             |
| 1981.66938  |             |             |             |             |             |
| PRRT2       | PRRT2       | 5.856856567 | 17.26505132 | 31.24995136 |             |
| 47.13771124 |             |             |             |             |             |
| WFIKKN1     | WFIKKN1     | 2.342742627 | 3.046773762 | 0           | 0           |
| FAM167A     | FAM167A     | 247.1593471 | 100.5435342 | 81.24987353 |             |
| 120.6725408 |             |             |             |             |             |
| DHX29       | DHX29       | 1594.236358 | 1599.556225 | 1607.140355 |             |
| 1915.676585 |             |             |             |             |             |
| DPPA4       | DPPA4       | 1.171371313 | 1.015591254 | 0           | 0           |
| GGNBP2      | GGNBP2      | 4184.138332 | 4538.677314 | 5810.705241 |             |
| 4869.325571 |             |             |             |             |             |
| ATP8B4      | ATP8B4      | 540.0021755 | 437.7198305 | 216.0710922 |             |
| 326.1929618 |             |             |             |             |             |
| ZNF672      | ZNF672      | 3956.892297 | 4309.153691 | 4075.886513 |             |
| 3631.489274 |             |             |             |             |             |
| ADD1        | ADD1        | 15716.28891 | 11188.76885 | 7922.309097 |             |
| 9594.409745 |             |             |             |             |             |
| GEMIN8      | GEMIN8      | 583.3429141 | 926.2192237 | 644.6418537 |             |
| 778.7149896 |             |             |             |             |             |
| ALKBH5      | ALKBH5      | 8225.369363 | 9082.432585 | 10734.80472 |             |
| 9089.09348  |             |             |             |             |             |
| PPFIA4      | PPFIA4      | 5.856856567 | 1.015591254 | 15.1785478  |             |
| 34.88190631 |             |             |             |             |             |
| CD226       | CD226       | 3997.890293 | 3065.054405 | 2033.03255  |             |
| 3470.278301 |             |             |             |             |             |
| CNN2        | CNN2        | 37466.31146 | 40636.85285 | 10836.59027 |             |
| 16455.77499 |             |             |             |             |             |
| CCR6        | CCR6        | 630.1977666 | 975.9831951 | 1172.319604 |             |
| 2305.034079 |             |             |             |             |             |
| GP5         | GP5         | 67.93953618 | 77.18493531 | 125.8926612 |             |
| 94.27542247 |             |             |             |             |             |
| AKT1        | AKT1        | 7885.671682 | 13725.7158  | 7044.631891 |             |
| 8717.648316 |             |             |             |             |             |
| TUBB4B      | TUBB4B      | 25036.89045 | 36976.66197 | 14029.44245 |             |
| 18107.48039 |             |             |             |             |             |
| CYB5A       | CYB5A       | 1117.488233 | 1529.480429 | 1668.747402 |             |
| 1716.755443 |             |             |             |             |             |
| ATOX1       | ATOX1       | 2709.381848 | 2469.91793  | 1690.17594  |             |
| 1812.916374 |             |             |             |             |             |

|             |             |             |             |             |
|-------------|-------------|-------------|-------------|-------------|
| FEZ2        | FEZ2        | 242.4738619 | 83.27848283 | 77.67845051 |
| 101.8174563 |             |             |             |             |
| AURKB       | AURKB       | 7377.296532 | 8628.463294 | 3054.459531 |
| 4312.157824 |             |             |             |             |
| THOC7       | THOC7       | 3387.605839 | 2951.308184 | 1979.461204 |
| 2528.466831 |             |             |             |             |
| PAQR4       | PAQR4       | 5325.053991 | 5467.943312 | 1922.318436 |
| 2670.822719 |             |             |             |             |
| SLC43A2     | SLC43A2     | 220.2178069 | 191.946747  | 677.6775165 |
| 184.779828  |             |             |             |             |
| DDX24       | DDX24       | 10501.34383 | 14237.57379 | 18556.22112 |
| 14768.24493 |             |             |             |             |
| PPAPDC3     | PPAPDC3     | 1.171371313 | 0           | 16.02682182 |
| CDH24       | CDH24       | 128.8508445 | 37.5768764  | 124.9998054 |
| 96.16093092 |             |             |             |             |
| GNG10       | GNG10       | 1870.679988 | 2267.81527  | 977.6770496 |
| 1346.253033 |             |             |             |             |
| CNTN6       | CNTN6       | 0           | 0           | 2.828262674 |
| SPATA6L     | SPATA6L     | 17.5705697  | 16.24946006 | 69.64274874 |
| 18.85508449 |             |             |             |             |
| CCDC183     | CCDC183     | 70.28227881 | 21.32741634 | 190.1782754 |
| 111.2449985 |             |             |             |             |
| GJB6        | GJB6        | 263.5585455 | 208.1962071 | 224.9996498 |
| 249.8298695 |             |             |             |             |
| LEMD2       | LEMD2       | 3167.388032 | 2820.296913 | 3303.566286 |
| 3142.199831 |             |             |             |             |
| C15orf61    | C15orf61    |             | 276.44363   | 334.1295226 |
| 483.0349624 | 506.2590187 |             |             |             |
| USP48       | USP48       | 4862.362322 | 6006.206676 | 2935.709716 |
| 3904.887999 |             |             |             |             |
| RHOC        | RHOC        | 2254.889778 | 3235.673735 | 1270.533737 |
| 1556.487225 |             |             |             |             |
| CDIP1       | CDIP1       | 3262.269108 | 2490.229755 | 1484.819117 |
| 1577.227818 |             |             |             |             |
| LY6E        | LY6E        | 15799.45628 | 17449.88893 | 13367.83633 |
| 10118.58109 |             |             |             |             |
| SH3KBP1     | SH3KBP1     | 9018.387742 | 9650.148096 | 6984.810556 |
| 9115.490599 |             |             |             |             |
| C3orf20     | C3orf20     | 2.342742627 | 4.062365016 | 11.60712479 |
| 6.599279573 |             |             |             |             |
| ABTB2       | ABTB2       | 193.2762667 | 366.6284427 | 188.3925639 |
| 106.5312274 |             |             |             |             |
| MBTPS2      | MBTPS2      | 1279.137474 | 1394.406792 | 1194.640998 |
| 1170.900747 |             |             |             |             |
| ASB3        | ASB3        | 1560.26659  | 1811.814797 | 1639.283163 |
| 1417.902354 |             |             |             |             |
| ZNF618      | ZNF618      | 5.856856567 | 1.015591254 | 0           |
| LCNL1       | LCNL1       | 0           | 1.015591254 | 0           |
| COPB1       | COPB1       | 17483.88822 | 17025.37178 | 13752.65716 |
| 16479.34385 |             |             |             |             |

|             |             |             |               |             |
|-------------|-------------|-------------|---------------|-------------|
| SLM01       | SLM01       | 19.91331233 | 9.140321286   | 0.892855753 |
| 1.885508449 |             |             |               |             |
| CD164       | CD164       | 28979.7263  | 24020.76434   | 30957.98752 |
| 30127.59676 |             |             |               |             |
| TLL2        | TLL2        | 9.370970508 | 16.24946006   | 0 0         |
| RBMS1       | RBMS1       | 2636.756827 | 3062.007631   | 5707.133973 |
| 4512.021719 |             |             |               |             |
| CCR3        | CCR3        | 141.7359289 | 524.0450871   | 11.60712479 |
| 42.42394011 |             |             |               |             |
| PILRB       | PILRB       | 823.4740334 | 359.5193039   | 1205.355267 |
| 1306.657355 |             |             |               |             |
| GTF3C4      | GTF3C4      | 1746.514628 | 1429.952486   | 833.0344176 |
| 968.2085888 |             |             |               |             |
| STYXL1      | STYXL1      | 1658.66178  | 2825.374869   | 1843.74713  |
| 1627.193792 |             |             |               |             |
| SHISA6      | SHISA6      | 0 0         | 0 1.885508449 |             |
| C20orf197   | C20orf197   | 26.94154021 | 24.3741901    |             |
| 5.357134518 | 13.19855915 |             |               |             |
| ZNF143      | ZNF143      | 2218.577268 | 2455.699652   | 2571.424569 |
| 2679.307507 |             |             |               |             |
| NEK9        | NEK9        | 2363.827311 | 897.7826686   | 1341.069341 |
| 1508.40676  |             |             |               |             |
| ZAN         | ZAN         | 0 0         | 0 1.885508449 |             |
| TLR1        | TLR1        | 483.7763525 | 794.1923607   | 678.5703723 |
| 376.1589357 |             |             |               |             |
| PDCL        | PDCL        | 2224.434124 | 1947.904025   | 1566.068991 |
| 1524.433581 |             |             |               |             |
| NUP98       | NUP98       | 13899.49201 | 12091.62947   | 10752.66183 |
| 12164.35776 |             |             |               |             |
| NFIL3       | NFIL3       | 1534.496421 | 1874.781455   | 1619.640336 |
| 2450.21823  |             |             |               |             |
| TARBP1      | TARBP1      | 1694.974291 | 1096.838554   | 3188.387894 |
| 2071.231032 |             |             |               |             |
| SNX11       | SNX11       | 2097.926022 | 3507.852191   | 3654.458597 |
| 2934.793902 |             |             |               |             |
| CSRP3       | CSRP3       | 3.51411394  | 0 1.785711506 | 0           |
| TMX3        | TMX3        | 4457.067848 | 3082.319456   | 2118.746702 |
| 3179.91     |             |             |               |             |
| ERLEC1      | ERLEC1      | 3004.567419 | 4066.427381   | 3786.601249 |
| 3678.626985 |             |             |               |             |
| ERMAP       | ERMAP       | 494.3186943 | 403.1897279   | 276.7852834 |
| 290.3683012 |             |             |               |             |
| CXorf57     | CXorf57     | 432.2360147 | 309.7553325   | 779.4630724 |
| 518.5148236 |             |             |               |             |
| CSF2        | CSF2        | 2680.097565 | 3084.350639   | 2347.317775 |
| 5228.51493  |             |             |               |             |
| FKBP1A      | FKBP1A      | 6215.296189 | 3309.811897   | 1663.390268 |
| 2191.903572 |             |             |               |             |
| EOMES       | EOMES       | 86.6814772  | 151.3230969   | 822.3201485 |
| 444.9799941 |             |             |               |             |

|              |              |             |             |   |             |             |
|--------------|--------------|-------------|-------------|---|-------------|-------------|
| EFNB3        | EFNB3        | 4.685485254 | 0           | 0 | 0           |             |
| MIPOL1       | MIPOL1       | 1.171371313 | 0           | 0 | 0           |             |
| BRMS1L       | BRMS1L       | 361.9537359 | 396.0805891 |   | 583.9276625 |             |
| 516.6293151  |              |             |             |   |             |             |
| SLC10A7      | SLC10A7      | 978.0950467 | 965.8272826 |   | 613.3919023 |             |
| 1051.170961  |              |             |             |   |             |             |
| TCHP         | TCHP         | 1187.770512 | 1336.51809  |   | 1066.962625 |             |
| 1010.632529  |              |             |             |   |             |             |
| ZDHC18       | ZDHC18       | 2994.025077 | 2444.528149 |   | 1676.783104 |             |
| 2443.61895   |              |             |             |   |             |             |
| RHBDD1       | RHBDD1       | 2028.815115 | 2069.774976 |   | 2166.960913 |             |
| 2726.445218  |              |             |             |   |             |             |
| GJA9-MYCBP   | GJA9-MYCBP   |             | 5369.566101 |   | 5974.723348 |             |
| 3217.852134  | 4442.257907  |             |             |   |             |             |
| SLC25A53     | SLC25A53     |             | 255.3589463 |   | 318.8956538 |             |
| 286.6066967  | 233.8030477  |             |             |   |             |             |
| TUBGCP6      | TUBGCP6      | 3551.597822 | 2089.07121  |   | 3316.959123 |             |
| 3177.081737  |              |             |             |   |             |             |
| VPS11        | VPS11        | 2757.408072 | 3754.640866 |   | 3940.172438 |             |
| 3445.766691  |              |             |             |   |             |             |
| POLDIP2      | POLDIP2      | 10035.13804 | 14238.58938 |   | 8343.737012 |             |
| 8423.508998  |              |             |             |   |             |             |
| EIF5B        | EIF5B        | 2989.339592 | 3124.974289 |   | 3430.351803 |             |
| 3548.526902  |              |             |             |   |             |             |
| CEBPD        | CEBPD        | 317.4416259 | 191.946747  |   | 34.82137437 |             |
| 306.395123   |              |             |             |   |             |             |
| MAP3K8       | MAP3K8       | 1217.054795 | 994.2638377 |   | 796.4273317 |             |
| 1155.81668   |              |             |             |   |             |             |
| ICAM5        | ICAM5        | 16.39919839 | 5.07795627  |   | 1.785711506 | 0           |
| SPINT2       | SPINT2       | 203.8186085 | 1424.874529 |   | 5337.491692 |             |
| 3475.934827  |              |             |             |   |             |             |
| CLDN1        | CLDN1        | 10.54234182 | 8.124730032 |   | 7.142846024 |             |
| 47.13771124  |              |             |             |   |             |             |
| CKMT1B       | CKMT1B       | 1.171371313 | 0           | 0 | 0           |             |
| ERMN         | ERMN         | 37.48388203 | 29.45214637 |   | 0           | 16.96957604 |
| TMEM167B     | TMEM167B     |             | 1807.425937 |   | 1345.658412 |             |
| 3064.280944  | 2143.823107  |             |             |   |             |             |
| LINC01424    | LINC01424    |             | 19.91331233 |   | 7.109138778 |             |
| 9.821413283  | 7.542033798  |             |             |   |             |             |
| LOC101928791 | LOC101928791 |             | 5.856856567 |   | 0           | 0           |
| 16.96957604  |              |             |             |   |             |             |
| LOC101927769 | LOC101927769 |             | 0           | 0 | 0           | 0.942754225 |
| PPIL6        | PPIL6        | 124.1653592 | 250.8510398 |   | 162.4997471 |             |
| 118.7870323  |              |             |             |   |             |             |
| ARMCX2       | ARMCX2       | 50.36896648 | 11.17150379 |   | 198.2139772 |             |
| 114.0732612  |              |             |             |   |             |             |
| SIGMAR1      | SIGMAR1      | 6576.078554 | 9546.557788 |   | 8460.701116 |             |
| 8091.659511  |              |             |             |   |             |             |
| RNASE4       | RNASE4       | 92.53833376 | 170.6193307 |   | 171.4283046 |             |
| 84.84788022  |              |             |             |   |             |             |

|           |           |             |             |             |             |
|-----------|-----------|-------------|-------------|-------------|-------------|
| MAP2K4    | MAP2K4    | 3337.236872 | 4257.358537 | 4373.207478 |             |
|           |           | 3778.558933 |             |             |             |
| TLR4      | TLR4      | 0           | 1.015591254 | 0           | 0           |
| SMARCA1   | SMARCA1   | 0           | 0           | 132.1426514 | 58.45076193 |
| NCDN      | NCDN      | 2849.946406 | 2030.166917 | 1827.675726 |             |
|           |           | 2184.361539 |             |             |             |
| C1QTNF3   | C1QTNF3   | 42.16936728 | 14.21827756 | 49.10706642 |             |
|           |           | 39.59567744 |             |             |             |
| AMN       | AMN       | 0           | 3.046773762 | 116.0712479 | 42.42394011 |
| CDA       | CDA       | 3.51411394  | 4.062365016 | 10.71426904 | 0           |
| CD97      | CD97      | 8543.98236  | 9420.624473 | 10924.98299 |             |
|           |           | 12150.21645 |             |             |             |
| SLC19A1   | SLC19A1   | 3885.438647 | 4240.093486 | 1207.140978 |             |
|           |           | 2091.971625 |             |             |             |
| DND1      | DND1      | 805.9034637 | 824.6600983 | 756.2488228 |             |
|           |           | 972.9223599 |             |             |             |
| ITGAV     | ITGAV     | 659.4820495 | 291.4746899 | 565.1776917 |             |
|           |           | 601.4771954 |             |             |             |
| MMGT1     | MMGT1     | 940.6111647 | 433.6574655 | 574.1062492 |             |
|           |           | 724.9779988 |             |             |             |
| 10-Sep    | 10-Sep    | 44.51210991 | 18.28064257 | 91.96414256 |             |
|           |           | 142.3558879 |             |             |             |
| COL23A1   | COL23A1   | 9.370970508 | 9.140321286 | 0           | 6.599279573 |
| SYT15     | SYT15     | 2.342742627 | 1.015591254 | 7.142846024 |             |
|           |           | 3.771016899 |             |             |             |
| SHPRH     | SHPRH     | 1331.849183 | 991.217064  | 1241.962352 |             |
|           |           | 1618.709004 |             |             |             |
| NCBP2     | NCBP2     | 5865.056166 | 7050.234486 | 8022.308941 |             |
|           |           | 8117.113875 |             |             |             |
| SNAPC3    | SNAPC3    | 2450.508788 | 2818.26573  | 1414.283513 |             |
|           |           | 1699.785867 |             |             |             |
| SMAD2     | SMAD2     | 6472.997878 | 6161.592138 | 5308.920308 |             |
|           |           | 7432.674308 |             |             |             |
| DIP2A     | DIP2A     | 4129.08388  | 2899.51303  | 2744.638585 |             |
|           |           | 2697.219837 |             |             |             |
| QARS      | QARS      | 6638.161233 | 7958.173067 | 4373.207478 |             |
|           |           | 5824.3356   |             |             |             |
| TEL02     | TEL02     | 2909.686343 | 4261.420902 | 3012.495311 |             |
|           |           | 2720.788693 |             |             |             |
| SNRK-AS1  | SNRK-AS1  |             | 2137.752647 | 1916.420696 |             |
|           |           | 2373.210592 | 2693.44882  |             |             |
| MIR147B   | MIR147B   | 0           | 0           | 49.10706642 | 16.02682182 |
| LINC00623 | LINC00623 |             |             | 60.9113083  | 96.48116913 |
|           |           | 441.070742  | 253.6008864 |             |             |
| GATA3-AS1 | GATA3-AS1 |             | 5.856856567 | 36.56128515 |             |
|           |           | 16.96425931 | 11.3130507  |             |             |
| ARL6IP6   | ARL6IP6   | 4220.450842 | 4368.057984 | 3216.066422 |             |
|           |           | 3226.104957 |             |             |             |
| FAM96B    | FAM96B    | 4754.596161 | 4161.892959 | 2867.852679 |             |
|           |           | 2732.101743 |             |             |             |



|             |             |             |             |   |             |
|-------------|-------------|-------------|-------------|---|-------------|
| CLCNKA      | CLCNKA      | 0           | 3.046773762 | 0 | 0           |
| LOC731157   | LOC731157   |             | 21.08468364 |   | 20.31182508 |
| 33.03566286 | 16.96957604 |             |             |   |             |
| GOLGA6L4    | GOLGA6L4    |             | 3.51411394  |   | 4.062365016 |
| 7.142846024 | 9.427542247 |             |             |   |             |
| CCDC74A     | CCDC74A     | 117.1371313 | 166.5569657 |   | 126.7855169 |
| 81.07686333 |             |             |             |   |             |
| NFIC        | NFIC        | 221.3891782 | 165.5413744 |   | 491.9635199 |
| 635.4163475 |             |             |             |   |             |
| HIST1H4B    | HIST1H4B    |             | 29.28428284 |   | 25.38978135 |
| 38.39279738 | 6.599279573 |             |             |   |             |
| HIST1H4H    | HIST1H4H    |             | 30.45565415 |   | 30.46773762 |
| 40.17850889 | 19.79783872 |             |             |   |             |
| HIST1H4C    | HIST1H4C    |             | 41600.08083 |   | 44305.16846 |
| 20152.6472  | 22416.80996 |             |             |   |             |
| HIST1H4K    | HIST1H4K    |             | 26.94154021 |   | 28.43655511 |
| 19.64282657 | 22.62610139 |             |             |   |             |
| PTPRM       | PTPRM       | 900.7845401 | 258.9757698 |   | 599.999066  |
| 1105.850706 |             |             |             |   |             |
| FHOD1       | FHOD1       | 1014.407557 | 387.955859  |   | 320.5352153 |
| 457.235799  |             |             |             |   |             |
| DNAJC15     | DNAJC15     | 4719.455022 | 4832.183187 |   | 2866.066967 |
| 3381.659404 |             |             |             |   |             |
| PRELID1     | PRELID1     | 17624.45278 | 25646.72594 |   | 13445.51478 |
| 13512.4963  |             |             |             |   |             |
| NOS2        | NOS2        | 0           | 38.39279738 |   | 22.62610139 |
| FHIT        | FHIT        | 97.22381902 | 141.1671843 |   | 273.2138604 |
| 207.4059294 |             |             |             |   |             |
| C8orf88     | C8orf88     | 72.62502143 | 64.99784026 |   | 97.32127708 |
| 92.38991402 |             |             |             |   |             |
| PYCR1       | PYCR1       | 2480.964442 | 3257.001152 |   | 3092.852328 |
| 2615.200219 |             |             |             |   |             |
| STOML2      | STOML2      | 9119.125675 | 12479.58533 |   | 7446.41698  |
| 7381.76558  |             |             |             |   |             |
| ITGAL       | ITGAL       | 46680.31821 | 39438.45517 |   | 15688.36844 |
| 26595.09668 |             |             |             |   |             |
| HPD         | HPD         | 22.25605496 | 21.32741634 |   | 60.71419121 |
| 46.19495701 |             |             |             |   |             |
| PTBP1       | PTBP1       | 25204.39655 | 22980.7989  |   | 18341.04288 |
| 18774.95039 |             |             |             |   |             |
| TRAT1       | TRAT1       | 8748.97234  | 8486.280519 |   | 9652.663546 |
| 8213.274806 |             |             |             |   |             |
| ZNF2        | ZNF2        | 297.5283136 | 310.7709237 |   | 476.7849721 |
| 521.3430863 |             |             |             |   |             |
| ETFB        | ETFB        | 3334.894129 | 4789.528354 |   | 2725.888614 |
| 2870.686614 |             |             |             |   |             |
| BAMBI       | BAMBI       | 8.199599194 | 29.45214637 |   | 58.9284797  |
| 13.19855915 |             |             |             |   |             |
| MAPK10      | MAPK10      | 0           | 1.015591254 | 0 | 0           |
| PMPCA       | PMPCA       | 5056.80996  | 8769.630479 |   | 5675.884022 |

|             |           |             |             |             |             |
|-------------|-----------|-------------|-------------|-------------|-------------|
| 6107.161868 |           |             |             |             |             |
| COL6A4P2    | COL6A4P2  | 0           | 0           | 24.99996108 |             |
| 2.828262674 |           |             |             |             |             |
| LINC00173   | LINC00173 | 0           | 0           | 3.571423012 |             |
| 13.19855915 |           |             |             |             |             |
| CLUL1       | CLUL1     | 64.42542224 | 52.81074521 | 28.5713841  |             |
| 36.76741476 |           |             |             |             |             |
| LRFN3       | LRFN3     | 66.76816487 | 16.24946006 | 27.67852834 |             |
| 34.88190631 |           |             |             |             |             |
| MFAP1       | MFAP1     | 4284.876265 | 5005.849291 | 4257.13623  |             |
| 4384.749899 |           |             |             |             |             |
| CRADD       | CRADD     | 380.6956769 | 592.0897011 | 425.8921942 |             |
| 451.5792736 |           |             |             |             |             |
| PGA5        | PGA5      | 1.171371313 | 0           | 0           | 0.942754225 |
| SLC35F6     | SLC35F6   | 1154.972115 | 815.519777  | 458.9278571 |             |
| 922.956386  |           |             |             |             |             |
| DPT         | DPT       | 0           | 0           | 0.892855753 | 0           |
| WASL        | WASL      | 251.8448324 | 231.5548059 | 452.6778668 |             |
| 452.5220279 |           |             |             |             |             |
| GDF10       | GDF10     | 51.54033779 | 63.98224901 | 0           | 98.9891936  |
| RING1       | RING1     | 1.171371313 | 5.07795627  | 12.49998054 |             |
| 0.942754225 |           |             |             |             |             |
| AP3D1       | AP3D1     | 7958.296704 | 6296.665775 | 5039.27787  |             |
| 6144.872037 |           |             |             |             |             |
| DLST        | DLST      | 1296.708044 | 476.3122981 | 457.1421456 |             |
| 515.6865609 |           |             |             |             |             |
| EN02        | EN02      | 2454.022902 | 2968.573236 | 5366.063076 |             |
| 3996.335159 |           |             |             |             |             |
| FRK         | FRK       | 0           | 2.031182508 | 0           | 5.656525348 |
| GNS         | GNS       | 4031.860061 | 4121.269309 | 6819.632242 |             |
| 5409.523741 |           |             |             |             |             |
| ESM1        | ESM1      | 5.856856567 | 0           | 9.821413283 | 17.91233027 |
| RAB34       | RAB34     | 443.9497278 | 1154.727256 | 1029.462683 |             |
| 393.1285117 |           |             |             |             |             |
| EVA1B       | EVA1B     | 402.9517318 | 519.9827221 | 147.3211993 |             |
| 231.9175393 |           |             |             |             |             |
| NUCB2       | NUCB2     | 3702.704722 | 2156.100232 | 3834.815459 |             |
| 3252.502075 |           |             |             |             |             |
| QKI         | QKI       | 2669.555223 | 2998.025382 | 3716.9585   |             |
| 3642.802324 |           |             |             |             |             |
| SRSF7       | SRSF7     | 17049.30947 | 18982.41613 | 17208.00893 |             |
| 17677.58447 |           |             |             |             |             |
| BAG1        | BAG1      | 2637.928198 | 3598.239813 | 4216.957722 |             |
| 2911.225046 |           |             |             |             |             |
| PTTG2       | PTTG2     | 1.171371313 | 3.046773762 | 10.71426904 |             |
| 4.713771124 |           |             |             |             |             |
| E4F1        | E4F1      | 1890.5933   | 1879.859411 | 2212.496556 |             |
| 1877.966416 |           |             |             |             |             |
| FUT4        | FUT4      | 462.6916688 | 509.8268095 | 425.8921942 |             |
| 619.3895256 |           |             |             |             |             |

|             |         |             |   |             |             |
|-------------|---------|-------------|---|-------------|-------------|
| HBB         | HBB     | 0           | 0 | 1.785711506 | 0           |
| FUT2        | FUT2    | 4.685485254 |   | 22.34300759 | 15.1785478  |
| 10.37029647 |         |             |   |             |             |
| CYP1A1      | CYP1A1  | 42.16936728 |   | 254.9134048 | 1105.355422 |
| 84.84788022 |         |             |   |             |             |
| GPATCH4     | GPATCH4 | 2547.732607 |   | 3858.231174 | 3659.815732 |
| 3458.022496 |         |             |   |             |             |
| MT1M        | MT1M    | 0           | 0 | 0           | 1.885508449 |
| IL5RA       | IL5RA   | 0           | 0 | 0           | 16.96957604 |
| SNRNP27     | SNRNP27 | 2811.291152 |   | 2842.63992  | 2329.46066  |
| 2624.627762 |         |             |   |             |             |
| OSBPL3      | OSBPL3  | 5381.279814 |   | 5843.712076 | 2497.317541 |
| 3343.949235 |         |             |   |             |             |
| SNORD11     | SNORD11 | 23.42742627 |   | 14.21827756 | 32.14280711 |
| 23.56885562 |         |             |   |             |             |
| SOAT1       | SOAT1   | 8301.508498 |   | 10165.05286 | 9304.449802 |
| 8200.076247 |         |             |   |             |             |
| RHN01       | RHN01   | 4247.392383 |   | 5652.78092  | 3404.458986 |
| 3876.605372 |         |             |   |             |             |
| NARF        | NARF    | 7540.117145 |   | 8195.82142  | 4706.242674 |
| 5390.668657 |         |             |   |             |             |
| PEX5        | PEX5    | 942.9539073 |   | 583.9649711 | 988.3913186 |
| 1108.678968 |         |             |   |             |             |
| ZNF8        | ZNF8    | 409.9799597 |   | 337.1762963 | 598.2133545 |
| 585.4503735 |         |             |   |             |             |
| HIC1        | HIC1    | 1041.349098 |   | 939.42191   | 234.821063  |
| 328.0784702 |         |             |   |             |             |
| GNAI3       | GNAI3   | 11778.13856 |   | 13905.47545 | 8580.343787 |
| 10830.36053 |         |             |   |             |             |
| KCNH6       | KCNH6   | 0           | 0 | 2.678567259 | 1.885508449 |
| CCDC167     | CCDC167 | 4207.565758 |   | 4302.044552 | 1470.533425 |
| 2055.20421  |         |             |   |             |             |
| ZNF229      | ZNF229  | 44.51210991 |   | 49.76397145 | 41.96422039 |
| 52.79423658 |         |             |   |             |             |
| PRR18       | PRR18   | 1.171371313 |   | 0           | 0           |
| HRH2        | HRH2    | 641.9114798 |   | 335.1451138 | 323.2137826 |
| 531.7133827 |         |             |   |             |             |
| TIA1        | TIA1    | 5538.24357  |   | 4384.307444 | 4316.957566 |
| 4745.824767 |         |             |   |             |             |
| ACSBG2      | ACSBG2  | 5.856856567 |   | 23.35859884 | 43.7499319  |
| 7.542033798 |         |             |   |             |             |
| IPPK        | IPPK    | 2208.034926 |   | 2420.153958 | 1688.390229 |
| 2017.494041 |         |             |   |             |             |
| PDDC1       | PDDC1   | 1017.921671 |   | 857.1590184 | 748.213121  |
| 1056.827486 |         |             |   |             |             |
| DNHD1       | DNHD1   | 227.2460348 |   | 125.9333155 | 395.5350986 |
| 487.4039342 |         |             |   |             |             |
| DZANK1      | DZANK1  | 89.02421982 |   | 71.09138778 | 98.21413283 |
| 95.2181767  |         |             |   |             |             |
| 12-Sep      | 12-Sep  | 0           | 0 | 6.249990271 | 1.885508449 |

|              |              |             |             |             |             |
|--------------|--------------|-------------|-------------|-------------|-------------|
| C5orf63      | C5orf63      | 327.9839678 | 316.8644713 | 558.0348456 |             |
| 405.3843166  |              |             |             |             |             |
| ZNF879       | ZNF879       | 203.8186085 | 225.4612584 | 1407.140667 |             |
| 712.7221939  |              |             |             |             |             |
| RBM14        | RBM14        | 11787.50953 | 13476.89594 | 9955.341646 |             |
| 8313.206754  |              |             |             |             |             |
| TEAD3        | TEAD3        | 35.1411394  | 4.062365016 | 65.17846997 |             |
| 64.10728728  |              |             |             |             |             |
| PFKFB3       | PFKFB3       | 3956.892297 | 3326.061357 | 3967.850966 |             |
| 3450.480462  |              |             |             |             |             |
| ZNF541       | ZNF541       | 33.96976809 | 26.40537261 | 28.5713841  |             |
| 27.33987252  |              |             |             |             |             |
| OAS1         | OAS1         | 10900.78144 | 14144.1394  | 15426.7617  |             |
| 10976.48744  |              |             |             |             |             |
| SNRPD2       | SNRPD2       | 16867.74691 | 20947.58521 | 12682.12312 |             |
| 12505.63479  |              |             |             |             |             |
| CLYBL-AS1    | CLYBL-AS1    |             | 3.51411394  | 0           | 0           |
|              |              |             |             |             | 0           |
| FBXW10       | FBXW10       | 2.342742627 | 0           | 2.678567259 | 0           |
| MIR6079      | MIR6079      | 1.171371313 | 7.109138778 | 0.892855753 |             |
| 12.25580492  |              |             |             |             |             |
| CHCHD7       | CHCHD7       | 2167.03693  | 2448.590514 | 3011.602455 |             |
| 2988.530892  |              |             |             |             |             |
| ARHGEF37     | ARHGEF37     |             | 8.199599194 | 17.26505132 |             |
| 20.53568232  |              |             |             |             |             |
| CAPSL        | CAPSL        | 7.028227881 | 0           | 0           | 2.828262674 |
| GOLGA7B      | GOLGA7B      | 72.62502143 | 18.28064257 | 44.64278765 |             |
| 30.16813519  |              |             |             |             |             |
| ZBTB1        | ZBTB1        | 4676.114283 | 3563.70971  | 5270.52751  |             |
| 5688.578992  |              |             |             |             |             |
| NUTM2A       | NUTM2A       | 1.171371313 | 2.031182508 | 2.678567259 | 0           |
| SMARCAL1     | SMARCAL1     |             | 2630.89997  | 3297.624802 |             |
| 2233.032238  |              |             |             |             |             |
| REG4         | REG4         | 585.6856567 | 312.8021062 | 64.28561422 |             |
| 171.5812689  |              |             |             |             |             |
| CUL9         | CUL9         | 1580.179902 | 791.1455869 | 1680.354527 |             |
| 1346.253033  |              |             |             |             |             |
| LOC101928696 | LOC101928696 |             | 7.028227881 | 0           | 0           |
| 1.885508449  |              |             |             |             |             |
| KIAA0513     | KIAA0513     |             | 467.3771541 | 335.1451138 |             |
| 896.427176   |              |             |             |             |             |
| CYTH1        | CYTH1        | 28492.43583 | 27998.83528 | 20008.89743 |             |
| 23982.72472  |              |             |             |             |             |
| PCDH11X      | PCDH11X      | 0           | 0           | 1.785711506 | 0           |
| SLC30A6      | SLC30A6      | 4050.602002 | 3577.927988 | 2447.317619 |             |
| 3030.012078  |              |             |             |             |             |
| GRIK1        | GRIK1        | 4.685485254 | 7.109138778 | 9.821413283 | 0           |
| HAP1         | HAP1         | 4.685485254 | 18.28064257 | 38.39279738 |             |
| 14.14131337  |              |             |             |             |             |
| SULT2B1      | SULT2B1      | 22.25605496 | 13.2026863  | 12.49998054 |             |
| 29.22538097  |              |             |             |             |             |

|              |              |             |             |             |             |
|--------------|--------------|-------------|-------------|-------------|-------------|
| FAM46A       | FAM46A       | 112.4516461 | 152.3386881 | 1146.426787 |             |
| 348.8190631  |              |             |             |             |             |
| AG04         | AG04         | 1604.778699 | 675.3681839 | 821.4272928 |             |
| 1539.517649  |              |             |             |             |             |
| ZNF281       | ZNF281       | 3758.930545 | 3231.61137  | 3326.780536 |             |
| 4127.377996  |              |             |             |             |             |
| WBP2         | WBP2         | 4539.06384  | 4509.225168 | 6919.632086 |             |
| 5656.525348  |              |             |             |             |             |
| IFT46        | IFT46        | 720.3933578 | 782.0052656 | 913.3914353 |             |
| 951.2390127  |              |             |             |             |             |
| ZNF267       | ZNF267       | 4460.581962 | 3390.043606 | 6774.096598 |             |
| 8415.02421   |              |             |             |             |             |
| MAPK3        | MAPK3        | 648.9397077 | 184.8376082 | 168.7497373 |             |
| 184.779828   |              |             |             |             |             |
| MKL1         | MKL1         | 2316.972458 | 1277.613798 | 833.0344176 |             |
| 1061.541257  |              |             |             |             |             |
| LOC101929089 | LOC101929089 |             | 99.56656164 | 74.13816155 |             |
| 108.9284019  | 115.0160154  |             |             |             |             |
| CDCA2        | CDCA2        | 4228.650442 | 4629.064936 | 1595.533231 |             |
| 2347.45802   |              |             |             |             |             |
| SLC39A4      | SLC39A4      | 484.9477238 | 694.6644178 | 510.7134907 |             |
| 521.3430863  |              |             |             |             |             |
| CEP72        | CEP72        | 707.5082733 | 975.9831951 | 773.2130821 |             |
| 617.5040172  |              |             |             |             |             |
| STK10        | STK10        | 20771.9275  | 23781.0848  | 12827.6586  |             |
| 12604.62398  |              |             |             |             |             |
| DDX47        | DDX47        | 5981.021927 | 7387.410782 | 7093.738958 |             |
| 6350.392458  |              |             |             |             |             |
| USP16        | USP16        | 2944.827482 | 3075.210317 | 2924.995447 |             |
| 3153.512882  |              |             |             |             |             |
| OGDHL        | OGDHL        | 8.199599194 | 2.031182508 | 0           | 0           |
| ZNF175       | ZNF175       | 199.1331233 | 178.7440607 | 296.42811   |             |
| 299.7958435  |              |             |             |             |             |
| VEZF1        | VEZF1        | 2581.702375 | 2026.104552 | 3641.065761 |             |
| 3268.528897  |              |             |             |             |             |
| SNAP29       | SNAP29       | 4259.106096 | 5266.856244 | 2941.06685  |             |
| 3611.691435  |              |             |             |             |             |
| VAMP3        | VAMP3        | 1458.357285 | 1345.658412 | 2026.782559 |             |
| 2059.917981  |              |             |             |             |             |
| ZNF850       | ZNF850       | 118.3085027 | 69.06020528 | 65.17846997 |             |
| 134.8138541  |              |             |             |             |             |
| SLC4A7       | SLC4A7       | 3242.355796 | 1699.084168 | 1599.104654 |             |
| 2389.88196   |              |             |             |             |             |
| CATIP-AS1    | CATIP-AS1    |             | 3.51411394  | 1.015591254 |             |
| 49.99992217  | 13.19855915  |             |             |             |             |
| NFIA-AS2     | NFIA-AS2     |             | 0           | 0           | 0.892855753 |
| ZNF302       | ZNF302       | 947.6393926 | 882.5487998 | 2551.781742 | 0           |
| 2378.568909  |              |             |             |             |             |
| HDAC10       | HDAC10       | 1144.429773 | 603.2612049 | 394.6422428 |             |
| 491.1749511  |              |             |             |             |             |

|             |         |             |             |             |
|-------------|---------|-------------|-------------|-------------|
| AGPAT2      | AGPAT2  | 593.8852559 | 1062.308452 | 1333.033639 |
| 1032.315876 |         |             |             |             |
| SATL1       | SATL1   | 26.94154021 | 15.23386881 | 17.85711506 |
| 10.37029647 |         |             |             |             |
| AP1G1       | AP1G1   | 7996.951957 | 5791.916922 | 5032.135024 |
| 5158.751118 |         |             |             |             |
| FAM86B1     | FAM86B1 | 18.74194102 | 3.046773762 | 30.3570956  |
| 52.79423658 |         |             |             |             |
| MEF2C       | MEF2C   | 38.65525334 | 5.07795627  | 22.32139383 |
| 55.62249926 |         |             |             |             |
| LEPROT      | LEPROT  | 1823.825135 | 2300.31419  | 2764.281411 |
| 2733.044497 |         |             |             |             |
| DOCK10      | DOCK10  | 11084.68674 | 7596.62258  | 8099.094536 |
| 9286.129113 |         |             |             |             |
| C1orf21     | C1orf21 | 228.4174061 | 79.21611782 | 27.67852834 |
| 35.82466054 |         |             |             |             |
| PGM2        | PGM2    | 3569.168392 | 4341.652611 | 2665.174423 |
| 3231.761482 |         |             |             |             |
| SGPP1       | SGPP1   | 3395.805438 | 3746.516136 | 3546.423051 |
| 3548.526902 |         |             |             |             |
| C4orf46     | C4orf46 | 2796.063325 | 2636.474896 | 1894.639908 |
| 1993.925185 |         |             |             |             |
| ELP4        | ELP4    | 1366.990323 | 1434.014851 | 1085.712596 |
| 1200.126128 |         |             |             |             |
| VPS54       | VPS54   | 3238.841682 | 2927.949585 | 2591.067395 |
| 2997.958435 |         |             |             |             |
| RNF10       | RNF10   | 16648.70048 | 21423.8975  | 14218.72787 |
| 13762.32617 |         |             |             |             |
| PLCL2       | PLCL2   | 3620.70873  | 2814.203365 | 5094.634927 |
| 3926.571346 |         |             |             |             |
| NANOS3      | NANOS3  | 5.856856567 | 3.046773762 | 4.464278765 |
| 1.885508449 |         |             |             |             |
| LRRC8B      | LRRC8B  | 3846.783393 | 3016.306025 | 2599.103097 |
| 3619.233469 |         |             |             |             |
| NOTO        | NOTO    | 0           | 7.142846024 | 0           |
| CNTD2       | CNTD2   | 0           | 0           | 1.885508449 |
| MED23       | MED23   | 3958.063668 | 3292.546846 | 3634.815771 |
| 3616.405206 |         |             |             |             |
| CDH4        | CDH4    | 23.42742627 | 15.23386881 | 29.46423985 |
| 37.71016899 |         |             |             |             |
| ZNF334      | ZNF334  | 7.028227881 | 23.35859884 | 43.7499319  |
| 25.45436407 |         |             |             |             |
| FAM73A      | FAM73A  | 449.8065844 | 356.4725302 | 801.7844662 |
| 760.8026593 |         |             |             |             |
| HSPBP1      | HSPBP1  | 3495.371999 | 4208.610157 | 2469.639013 |
| 2759.441616 |         |             |             |             |
| NDUFB8      | NDUFB8  | 15854.51073 | 21745.83993 | 11703.55321 |
| 11144.29769 |         |             |             |             |
| EXOG        | EXOG    | 1229.939879 | 1141.52457  | 729.4631502 |
| 963.4948177 |         |             |             |             |

|                |                |             |             |             |
|----------------|----------------|-------------|-------------|-------------|
| SDE2           | SDE2           | 2945.998853 | 3114.818376 | 3241.959239 |
| 3046.981654    |                |             |             |             |
| POLR3F         | POLR3F         | 782.4760374 | 960.7493263 | 697.3203431 |
| 736.2910495    |                |             |             |             |
| PCGF2          | PCGF2          | 163.9919839 | 246.7886747 | 97.32127708 |
| 191.3791076    |                |             |             |             |
| PIEZ02         | PIEZ02         | 0           | 1.785711506 | 0           |
| KIAA1257       | KIAA1257       | 0           | 0           | 9.821413283 |
| 2.828262674    |                |             |             |             |
| HNRNPUL2-BSCL2 | HNRNPUL2-BSCL2 | 3632.422443 | 4152.752638 |             |
| 3216.959278    | 2634.055304    |             |             |             |
| STX16-NPEPL1   | STX16-NPEPL1   | 2962.398052 | 3010.212477 |             |
| 2771.424257    | 3244.017287    |             |             |             |
| GNAI1          | GNAI1          | 175.705697  | 66.01343151 | 232.1424958 |
| 181.9515654    |                |             |             |             |
| DPH6           | DPH6           | 652.4538216 | 563.653146  | 430.356473  |
| 569.4235517    |                |             |             |             |
| TUBB3          | TUBB3          | 187.4194102 | 62.96665775 | 18.74997081 |
| 27.33987252    |                |             |             |             |
| HSP90B1        | HSP90B1        | 36638.15194 | 38633.0913  | 29739.23942 |
| 31407.857      |                |             |             |             |
| SGPP2          | SGPP2          | 323.2984825 | 190.9311558 | 230.3567843 |
| 371.4451645    |                |             |             |             |
| ZNF326         | ZNF326         | 1880.050958 | 2035.244873 | 1279.462294 |
| 1341.539262    |                |             |             |             |
| CDK3           | CDK3           | 222.5605496 | 75.1537528  | 137.499786  |
| 192.3218618    |                |             |             |             |
| RAMP1          | RAMP1          | 640.7401085 | 770.8337618 | 53.57134518 |
| 191.3791076    |                |             |             |             |
| HDGFRP2        | HDGFRP2        | 3118.190436 | 3389.028015 | 1797.318631 |
| 2161.735437    |                |             |             |             |
| ZCCHC3         | ZCCHC3         | 1026.121271 | 533.1854084 | 744.641698  |
| 625.9888052    |                |             |             |             |
| EPG5           | EPG5           | 1584.865387 | 554.5128247 | 827.6772831 |
| 1191.64134     |                |             |             |             |
| SOGA1          | SOGA1          | 45.68348122 | 20.31182508 | 28.5713841  |
| 44.30944856    |                |             |             |             |
| H2AFY2         | H2AFY2         | 145.2500429 | 112.7306292 | 186.6068524 |
| 264.9139371    |                |             |             |             |
| CCDC122        | CCDC122        | 49.19759517 | 57.88870148 | 77.67845051 |
| 100.874702     |                |             |             |             |
| CSAD           | CSAD           | 173.3629544 | 186.8687907 | 315.1780808 |
| 264.9139371    |                |             |             |             |
| ZFP36L1        | ZFP36L1        | 4317.674661 | 2479.058251 | 5330.348846 |
| 5905.412464    |                |             |             |             |
| RSRC2          | RSRC2          | 2719.92419  | 2778.657671 | 3642.851472 |
| 3557.01169     |                |             |             |             |
| ZRANB2-AS2     | ZRANB2-AS2     | 16.39919839 | 13.2026863  |             |
| 12.49998054    | 8.484788022    |             |             |             |
| MAGEA10        | MAGEA10        | 0           | 0           | 4.713771124 |
|                |                | 0           |             |             |

|             |             |             |             |             |
|-------------|-------------|-------------|-------------|-------------|
| RARA        | RARA        | 790.6756366 | 536.2321821 | 614.2847581 |
| 573.1945686 |             |             |             |             |
| FGFR4       | FGFR4       | 16.39919839 | 13.2026863  | 55.35705669 |
| 12.25580492 |             |             |             |             |
| NSUN2       | NSUN2       | 8945.762721 | 10760.18934 | 9824.984706 |
| 10189.28766 |             |             |             |             |
| RPL11       | RPL11       | 6652.217689 | 6886.724294 | 8618.736584 |
| 6801.028977 |             |             |             |             |
| FPGT        | FPGT        | 925.3833376 | 837.8627846 | 617.8561811 |
| 1023.831088 |             |             |             |             |
| HS3ST3A1    | HS3ST3A1    |             | 53.88308042 | 63.98224901 |
| 7.142846024 | 17.91233027 |             |             |             |
| SCEL        | SCEL        | 0           | 0           | 0           |
| UQCR11      | UQCR11      | 9776.264982 | 11086.19413 | 7988.380422 |
| 7460.956934 |             |             |             |             |
| ADIRF       | ADIRF       | 4.685485254 | 3.046773762 | 6.249990271 |
| 9.427542247 |             |             |             |             |
| MRPL47      | MRPL47      | 3870.21082  | 4721.48374  | 2641.067317 |
| 3031.897587 |             |             |             |             |
| MIR4738     | MIR4738     | 1.171371313 | 2.031182508 | 4.464278765 |
| 0.942754225 |             |             |             |             |
| MIR4746     | MIR4746     | 1.171371313 | 0           | 5.656525348 |
| MIR3064     | MIR3064     | 1010.893444 | 643.8848551 | 1712.497334 |
| 1868.538873 |             |             |             |             |
| MIR4745     | MIR4745     | 4.685485254 | 3.046773762 | 1.785711506 |
| 4.713771124 |             |             |             |             |
| DIAPH3-AS1  | DIAPH3-AS1  |             | 240.1311193 | 144.2139581 |
| 71.42846024 | 98.04643937 |             |             |             |
| PRC1-AS1    | PRC1-AS1    |             | 1491.155682 | 1486.825596 |
| 543.7491536 | 971.9796057 |             |             |             |
| TM7SF2      | TM7SF2      | 1119.830976 | 913.0165374 | 688.3917856 |
| 765.5164305 |             |             |             |             |
| PKN2        | PKN2        | 1021.435785 | 894.7358948 | 2275.889314 |
| 1594.197394 |             |             |             |             |
| PPARGC1B    | PPARGC1B    |             | 167.5060978 | 246.7886747 |
| 300.8923888 | 313.9371568 |             |             |             |
| UBE2D1      | UBE2D1      | 2288.859547 | 2283.049139 | 2319.639246 |
| 2496.413187 |             |             |             |             |
| DNAH8       | DNAH8       | 2.342742627 | 9.140321286 | 7.142846024 |
| 40.53843166 |             |             |             |             |
| MASTL       | MASTL       | 3008.081533 | 2742.096386 | 1989.282618 |
| 1942.073703 |             |             |             |             |
| DPY19L3     | DPY19L3     | 499.0041795 | 233.5859884 | 315.1780808 |
| 356.3610969 |             |             |             |             |
| UBAC1       | UBAC1       | 1883.565072 | 2285.080322 | 1587.497529 |
| 1722.411969 |             |             |             |             |
| MAP7D3      | MAP7D3      | 1484.127454 | 1397.453566 | 1049.998366 |
| 1192.584094 |             |             |             |             |
| PLEKHF2     | PLEKHF2     | 1320.13547  | 1307.065944 | 2722.317191 |
| 2432.3059   |             |             |             |             |



|              |              |             |             |
|--------------|--------------|-------------|-------------|
| PRR5-ARHGAP8 | PRR5-ARHGAP8 | 251.8448324 | 221.3988934 |
| 564.2848359  | 415.7546131  |             |             |
| TRAPPC4      | TRAPPC4      | 4099.799597 | 5765.511549 |
| 4735.454471  |              |             | 5122.313455 |
| PAAF1        | PAAF1        | 1987.817119 | 2893.419483 |
| 1926.046881  |              |             | 1756.247266 |
| USP14        | USP14        | 9729.41013  | 11016.11833 |
| 8861.889712  |              |             | 7741.059379 |
| SYNP0        | SYNP0        | 0           | 0           |
| RBM19        | RBM19        | 3428.603834 | 3711.986034 |
| 3600.378384  |              |             | 3179.459337 |
| ZYX          | ZYX          | 12539.52991 | 10182.31791 |
| 7197.928506  |              |             | 4626.778512 |
| TRIM39       | TRIM39       | 48.02622385 | 76.16934405 |
| 77.30584643  |              |             | 231.24964   |
| LOC285627    | LOC285627    | 0           | 2.031182508 |
| LINC00174    | LINC00174    | 81.99599194 | 49.76397145 |
| 111.6069691  | 77.30584643  |             | 0           |
| HPGD         | HPGD         | 4521.49327  | 1885.952959 |
| 801.341091   |              |             | 331.2494844 |
| ZNF468       | ZNF468       | 1956.190093 | 2497.338894 |
| 2699.105345  |              |             | 3325.88768  |
| C17orf96     | C17orf96     | 210.8468364 | 98.51235164 |
| 41.07136464  | 86.73338867  |             |             |
| MIR6165      | MIR6165      | 2.342742627 | 0           |
| PINK1-AS     | PINK1-AS     | 2838.232693 | 0.892855753 |
| 4334.814681  | 3342.063727  |             | 6.599279573 |
| INSR         | INSR         | 74.96776406 | 18.28064257 |
| 186.6653365  |              |             | 50.89277792 |
| ZNF829       | ZNF829       | 488.4618377 | 247.804266  |
| 472.3198666  |              |             | 596.427643  |
| PSAP         | PSAP         | 23576.19043 | 31831.67668 |
| 25458.13508  |              |             | 32762.449   |
| PSD4         | PSD4         | 7227.361004 | 2880.216796 |
| 3481.591352  |              |             | 2219.639402 |
| C11orf49     | C11orf49     | 1154.462489 | 1239.31085  |
| 1154.462489  | 1160.530451  |             | 1544.714297 |
| C9orf16      | C9orf16      | 2138.924018 | 2336.875476 |
| 1537.632141  |              |             | 1346.426476 |
| VPS4A        | VPS4A        | 7303.500139 | 9801.471193 |
| 8535.696751  |              |             | 9030.343086 |
| C10orf95     | C10orf95     | 200.8925444 | 132.3649584 |
| 200.8925444  | 287.5400385  |             | 151.3230969 |
| PRPF18       | PRPF18       | 1724.258573 | 2109.383035 |
| 1984.497643  |              |             | 2321.424958 |
| RGS10        | RGS10        | 3775.329743 | 4417.821955 |
| 3607.920418  |              |             | 4125.886435 |
| OBSCN        | OBSCN        | 77.31050669 | 112.7306292 |
| 349.7618174  |              |             | 291.9638312 |
| TMC01        | TMC01        | 7085.625075 | 8667.055762 |
|              |              |             | 7629.45241  |

|             |          |             |             |             |             |
|-------------|----------|-------------|-------------|-------------|-------------|
| 7094.225541 |          |             |             |             |             |
| CISH        | CISH     | 7906.756366 | 22134.81138 | 13249.08652 |             |
| 12016.34535 |          |             |             |             |             |
| SNX33       | SNX33    | 103.0806756 | 119.839768  | 172.3211603 |             |
| 159.325464  |          |             |             |             |             |
| TM4SF20     | TM4SF20  | 1.171371313 | 0           | 0           | 0           |
| IMP4        | IMP4     | 4207.565758 | 6445.957689 | 6257.133117 |             |
| 4965.486502 |          |             |             |             |             |
| HPCAL1      | HPCAL1   | 3241.184424 | 3026.461937 | 5050.884995 |             |
| 4055.728675 |          |             |             |             |             |
| PRELID2     | PRELID2  | 38.65525334 | 32.49892013 | 16.07140355 |             |
| 82.01961755 |          |             |             |             |             |
| TECR        | TECR     | 8670.490462 | 10214.81683 | 7662.488073 |             |
| 7990.784809 |          |             |             |             |             |
| GZF1        | GZF1     | 722.7361004 | 697.7111915 | 732.1417175 |             |
| 953.1245212 |          |             |             |             |             |
| PPARG       | PPARG    | 91.36696245 | 106.6370817 | 34.82137437 |             |
| 170.6385147 |          |             |             |             |             |
| HCAR1       | HCAR1    | 22.25605496 | 17.26505132 | 0           | 7.542033798 |
| RSPH6A      | RSPH6A   | 1.171371313 | 0           | 0           | 3.771016899 |
| GPR63       | GPR63    | 112.4516461 | 178.7440607 | 112.4998249 |             |
| 129.1573288 |          |             |             |             |             |
| KIAA0040    | KIAA0040 |             | 7003.629083 | 11101.428   |             |
| 10727.66187 |          | 7949.303623 |             |             |             |
| COL9A1      | COL9A1   | 0           | 0           | 5.357134518 | 0           |
| CHST10      | CHST10   | 376.0101916 | 387.955859  | 434.8207517 |             |
| 312.9944026 |          |             |             |             |             |
| SAG         | SAG      | 0           | 4.062365016 | 10.71426904 | 0           |
| CCZ1        | CCZ1     | 1432.587116 | 1917.436288 | 1122.319682 |             |
| 1237.836297 |          |             |             |             |             |
| CCDC9       | CCDC9    | 1091.718064 | 1464.482588 | 1235.712362 |             |
| 1127.534053 |          |             |             |             |             |
| UGT1A4      | UGT1A4   | 0           | 0           | 2.678567259 | 0           |
| SARAF       | SARAF    | 31150.27734 | 27765.24929 | 75614.16801 |             |
| 57811.57457 |          |             |             |             |             |
| ACVR2A      | ACVR2A   | 162.8206126 | 66.01343151 | 251.7853224 |             |
| 326.1929618 |          |             |             |             |             |
| CCDC71L     | CCDC71L  | 370.1533351 | 225.4612584 | 192.8568427 |             |
| 266.7994456 |          |             |             |             |             |
| S100A1      | S100A1   | 15.22782708 | 23.35859884 | 21.42853807 |             |
| 21.68334717 |          |             |             |             |             |
| MRPS11      | MRPS11   | 3426.261092 | 4458.445605 | 2753.567142 |             |
| 2678.364752 |          |             |             |             |             |
| ADAM9       | ADAM9    | 1067.119267 | 1098.869737 | 491.0706642 |             |
| 577.9083398 |          |             |             |             |             |
| AAR2        | AAR2     | 4081.057656 | 5377.55569  | 5078.563523 |             |
| 4447.914432 |          |             |             |             |             |
| RADIL       | RADIL    | 8.199599194 | 2.031182508 | 24.10710533 |             |
| 10.37029647 |          |             |             |             |             |
| SACS        | SACS     | 1438.443973 | 944.4998663 | 931.2485504 |             |

|             |             |             |             |             |             |             |
|-------------|-------------|-------------|-------------|-------------|-------------|-------------|
| 1257.634136 |             |             |             |             |             |             |
| CNTN5       | CNTN5       | 2.342742627 | 0           | 0.892855753 | 0           |             |
| ZNF808      | ZNF808      | 591.5425133 | 591.0741099 | 1458.9263   |             |             |
| 852.2498191 |             |             |             |             |             |             |
| FGD3        | FGD3        | 10263.55545 | 12433.88372 | 12526.76622 |             |             |
| 11448.8073  |             |             |             |             |             |             |
| SLC39A14    | SLC39A14    |             | 3200.186428 | 3945.572022 |             |             |
| 2987.49535  |             | 3369.403599 |             |             |             |             |
| DTX2        | DTX2        | 1371.675808 | 1607.680955 | 1164.283902 |             |             |
| 1177.500027 |             |             |             |             |             |             |
| C3orf79     | C3orf79     | 0           | 0           | 6.249990271 | 0           |             |
| LOC344887   | LOC344887   |             | 30.45565415 | 48.74838019 |             |             |
| 696.4274874 |             | 169.6957604 |             |             |             |             |
| SNED1       | SNED1       | 413.4940737 | 196.009112  | 240.1781976 |             |             |
| 282.8262674 |             |             |             |             |             |             |
| LRIG3       | LRIG3       | 35.1411394  | 23.35859884 | 0.892855753 | 0           |             |
| NPIPA3      | NPIPA3      | 3.51411394  | 0           | 0           | 8.484788022 |             |
| FANCC       | FANCC       | 1296.708044 | 1174.02349  | 422.3207712 |             |             |
| 983.2926564 |             |             |             |             |             |             |
| FAM212B     | FAM212B     | 89.02421982 | 68.04461402 | 228.5710728 |             |             |
| 122.5580492 |             |             |             |             |             |             |
| FBN1        | FBN1        | 85.51010588 | 124.9177242 | 0           | 17.91233027 |             |
| ZNF683      | ZNF683      | 0           | 10.15591254 | 15.1785478  | 0           |             |
| TNNI2       | TNNI2       | 4.685485254 | 4.062365016 | 0           | 0           |             |
| CHM         | CHM         | 1128.030575 | 984.1079252 | 1148.212498 |             |             |
| 1176.557272 |             |             |             |             |             |             |
| IL6         | IL6         | 0           | 5.07795627  | 8.92855753  | 3.771016899 |             |
| PKD2L2      | PKD2L2      | 142.9073002 | 67.02902277 | 200.8925444 |             |             |
| 226.2610139 |             |             |             |             |             |             |
| RNF144A-AS1 | RNF144A-AS1 |             | 92.53833376 | 89.37203036 |             |             |
| 220.535371  |             | 222.489997  |             |             |             |             |
| MIR101-2    | MIR101-2    |             | 0           | 0           | 0           | 0.942754225 |
| MIR302A     | MIR302A     | 1.171371313 | 2.031182508 | 5.357134518 |             |             |
| 2.828262674 |             |             |             |             |             |             |
| MIR30C1     | MIR30C1     | 0           | 0           | 0.892855753 | 0.942754225 |             |
| MIR29C      | MIR29C      | 1.171371313 | 2.031182508 | 4.464278765 |             |             |
| 8.484788022 |             |             |             |             |             |             |
| MIR106B     | MIR106B     | 35.1411394  | 21.32741634 | 30.3570956  |             |             |
| 18.85508449 |             |             |             |             |             |             |
| KLC3        | KLC3        | 23.42742627 | 21.32741634 | 9.821413283 |             |             |
| 10.37029647 |             |             |             |             |             |             |
| ZNF815P     | ZNF815P     | 320.9557399 | 298.5838287 | 491.9635199 |             |             |
| 548.6829588 |             |             |             |             |             |             |
| PAIP2       | PAIP2       | 9915.658168 | 11494.46181 | 12649.08745 |             |             |
| 11676.01107 |             |             |             |             |             |             |
| PMM1        | PMM1        | 1597.750472 | 1938.763704 | 1052.676933 |             |             |
| 1518.777056 |             |             |             |             |             |             |
| FBX04       | FBX04       | 1132.71606  | 1041.996627 | 893.7486088 |             |             |
| 958.7810465 |             |             |             |             |             |             |
| ARL8B       | ARL8B       | 4908.045803 | 4584.378921 | 5479.455756 |             |             |

|             |          |             |             |             |
|-------------|----------|-------------|-------------|-------------|
| 5215.316371 |          |             |             |             |
| PLCD1       | PLCD1    | 865.6434006 | 1089.729416 | 1928.568427 |
| 1010.632529 |          |             |             |             |
| MOB3A       | MOB3A    | 9684.89802  | 11834.68488 | 6719.632397 |
| 7126.279185 |          |             |             |             |
| BCDIN3D     | BCDIN3D  | 584.5142854 | 630.6821688 | 1010.712712 |
| 887.1317255 |          |             |             |             |
| C17orf64    | C17orf64 | 0           | 2.031182508 | 9.821413283 |
| 0           |          |             |             |             |
| DNAJC24     | DNAJC24  | 878.5284851 | 723.1009729 | 893.7486088 |
| 741.0048206 |          |             |             |             |
| BZW2        | BZW2     | 4631.602173 | 6671.418948 | 4313.386143 |
| 4319.699858 |          |             |             |             |
| EIF5A       | EIF5A    | 10408.80549 | 34413.30964 | 22938.35715 |
| 8696.907723 |          |             |             |             |
| SGK1        | SGK1     | 2509.077353 | 4321.340786 | 2025.889704 |
| 1570.628538 |          |             |             |             |
| ZNF530      | ZNF530   | 514.2320066 | 449.9069255 | 588.3919412 |
| 522.2858405 |          |             |             |             |
| XRCC4       | XRCC4    | 1138.572917 | 900.8294423 | 572.3205377 |
| 834.3374889 |          |             |             |             |
| MRPS25      | MRPS25   | 2567.645919 | 3150.36407  | 2324.996381 |
| 2472.844331 |          |             |             |             |
| POLR1E      | POLR1E   | 1015.578929 | 1542.683115 | 1729.461594 |
| 1632.850317 |          |             |             |             |
| PI4KB       | PI4KB    | 7227.361004 | 8390.814941 | 7835.702089 |
| 7253.551005 |          |             |             |             |
| CUL2        | CUL2     | 5391.822156 | 5680.201884 | 4555.350052 |
| 5037.135823 |          |             |             |             |
| EGR4        | EGR4     | 107.7661608 | 100.5435342 | 18.74997081 |
| 95.2181767  |          |             |             |             |
| SNORA21     | SNORA21  | 12.88508445 | 5.07795627  | 5.357134518 |
| 19.79783872 |          |             |             |             |
| SNORA27     | SNORA27  | 56.22582305 | 42.65483267 | 36.60708587 |
| 79.19135488 |          |             |             |             |
| C4orf27     | C4orf27  | 1002.693844 | 782.0052656 | 683.0346511 |
| 1000.262232 |          |             |             |             |
| ZNF664      | ZNF664   | 679.3953618 | 348.3478001 | 492.8563757 |
| 679.725796  |          |             |             |             |
| HYI         | HYI      | 84.33873457 | 102.5747167 | 142.8569205 |
| 186.6653365 |          |             |             |             |
| EPX         | EPX      | 3.51411394  | 0           | 2.678567259 |
| 236.6313104 |          |             |             | 0.942754225 |
| TNFAIP2     | TNFAIP2  | 25.7701689  | 4.062365016 | 26.78567259 |
| 236.6313104 |          |             |             |             |
| CENPE       | CENPE    | 4124.398395 | 2930.996359 | 933.9271177 |
| 1962.814296 |          |             |             |             |
| MYL4        | MYL4     | 3.51411394  | 6.093547524 | 0           |
| 5755.514542 |          |             |             | 1.885508449 |
| CCNG1       | CCNG1    | 6724.842711 | 9338.361581 | 7126.774621 |
| 5755.514542 |          |             |             |             |
| GFPT2       | GFPT2    | 22.25605496 | 2.031182508 | 4.464278765 |

|             |           |             |             |             |             |             |
|-------------|-----------|-------------|-------------|-------------|-------------|-------------|
| 131.9855915 |           |             |             |             |             |             |
| SENP3       | SENP3     | 1419.702032 |             | 693.6488265 |             | 803.5701777 |
| 595.82067   |           |             |             |             |             |             |
| ENOX1-AS2   | ENOX1-AS2 |             | 0           | 0           | 0.892855753 | 0           |
| SYCP1       | SYCP1     | 0           | 0           | 0           | 0.942754225 |             |
| BMP2        | BMP2      | 0           | 0           | 14.28569205 |             | 0           |
| BCAT2       | BCAT2     | 2530.162037 |             | 3410.355431 |             | 1566.961847 |
| 1860.054085 |           |             |             |             |             |             |
| BAK1        | BAK1      | 14344.6131  |             | 14722.01082 |             | 5071.420677 |
| 6462.58021  |           |             |             |             |             |             |
| SUPT4H1     | SUPT4H1   | 6166.098594 |             | 5468.958903 |             | 4349.100373 |
| 4149.061343 |           |             |             |             |             |             |
| ALDH7A1     | ALDH7A1   | 63.25405093 |             | 31.48332888 |             | 57.14276819 |
| 40.53843166 |           |             |             |             |             |             |
| CUL5        | CUL5      | 2503.220497 |             | 2199.770656 |             | 2451.781898 |
| 2601.058906 |           |             |             |             |             |             |
| PKP2        | PKP2      | 2.342742627 |             | 10.15591254 |             | 38.39279738 |
| 0.942754225 |           |             |             |             |             |             |
| STRN        | STRN      | 2883.916174 |             | 2115.476582 |             | 1841.068563 |
| 2138.166582 |           |             |             |             |             |             |
| ACY1        | ACY1      | 1292.022559 |             | 1754.941687 |             | 967.8556363 |
| 1418.845108 |           |             |             |             |             |             |
| LYST        | LYST      | 4270.819809 |             | 2651.708764 |             | 3033.030993 |
| 3940.712659 |           |             |             |             |             |             |
| CHRNE       | CHRNE     | 91.36696245 |             | 45.70160643 |             | 177.6782949 |
| 89.56165135 |           |             |             |             |             |             |
| CHRNA1      | CHRNA1    | 1.171371313 |             | 1.015591254 |             | 8.92855753  |
| RAB11B      | RAB11B    | 3460.23086  |             | 2844.671103 |             | 2526.781781 |
| 2323.889164 |           |             |             |             |             |             |
| UGT2B4      | UGT2B4    | 0           | 0           | 6.249990271 |             | 0           |
| ELOVL7      | ELOVL7    | 15.22782708 |             | 9.140321286 |             | 5.357134518 |
| 18.85508449 |           |             |             |             |             |             |
| MEM01       | MEM01     | 2362.655939 |             | 3006.150112 |             | 1574.104693 |
| 2143.823107 |           |             |             |             |             |             |
| PTRH1       | PTRH1     | 685.2522184 |             | 1083.635868 |             | 851.7843884 |
| 682.5540587 |           |             |             |             |             |             |
| RGS19       | RGS19     | 4047.087888 |             | 5347.087953 |             | 1198.212421 |
| 1426.387142 |           |             |             |             |             |             |
| ELM01       | ELM01     | 12271.28588 |             | 11260.87582 |             | 8333.915599 |
| 9172.055852 |           |             |             |             |             |             |
| HECTD4      | HECTD4    | 1512.240366 |             | 706.8515128 |             | 1201.783844 |
| 1067.197782 |           |             |             |             |             |             |
| FAM222B     | FAM222B   | 1662.175894 |             | 1966.184668 |             | 1407.140667 |
| 1726.182985 |           |             |             |             |             |             |
| NHP2L1      | NHP2L1    | 10257.69859 |             | 11849.91875 |             | 11122.30412 |
| 10196.82969 |           |             |             |             |             |             |
| USP33       | USP33     | 5293.426966 |             | 4961.163276 |             | 6798.203704 |
| 6976.381263 |           |             |             |             |             |             |
| MYCN        | MYCN      | 0           | 1.015591254 | 0           |             | 0           |
| WAC         | WAC       | 7834.131344 |             | 7678.885472 |             | 8531.23672  |

|             |          |             |             |             |             |
|-------------|----------|-------------|-------------|-------------|-------------|
| 9147.544242 |          |             |             |             |             |
| HIC2        | HIC2     | 160.4778699 | 46.71719769 | 108.0355461 |             |
| 179.1233027 |          |             |             |             |             |
| DSE         | DSE      | 219.0464356 | 737.3192504 | 641.9632864 |             |
| 483.6329173 |          |             |             |             |             |
| TBX21       | TBX21    | 2912.029085 | 1487.841187 | 2020.532569 |             |
| 2678.364752 |          |             |             |             |             |
| KCNJ14      | KCNJ14   | 29.28428284 | 22.34300759 | 64.28561422 |             |
| 49.96597391 |          |             |             |             |             |
| RPA4        | RPA4     | 11.71371313 | 12.18709505 | 6.249990271 |             |
| 6.599279573 |          |             |             |             |             |
| RBM34       | RBM34    | 2491.506784 | 3058.960857 | 3049.995252 |             |
| 3018.699028 |          |             |             |             |             |
| SETX        | SETX     | 10371.32161 | 7381.317234 | 11631.23189 |             |
| 13032.6344  |          |             |             |             |             |
| SEC23A      | SEC23A   | 5870.913023 | 6645.013575 | 5662.491186 |             |
| 6208.979324 |          |             |             |             |             |
| ATP5H       | ATP5H    | 5096.636585 | 4838.276734 | 3670.530001 |             |
| 4357.410027 |          |             |             |             |             |
| TP53RK      | TP53RK   | 2079.184081 | 2478.04266  | 2762.4957   |             |
| 2696.277083 |          |             |             |             |             |
| USP38       | USP38    | 4525.007384 | 3879.55859  | 2898.209774 |             |
| 3430.682624 |          |             |             |             |             |
| RNF181      | RNF181   | 3266.954593 | 3738.391406 | 3024.102436 |             |
| 2927.251868 |          |             |             |             |             |
| HELB        | HELB     | 2865.174233 | 1655.413744 | 2298.210708 |             |
| 2430.420391 |          |             |             |             |             |
| RNF114      | RNF114   | 6870.092753 | 8324.801509 | 10444.6266  |             |
| 8706.335265 |          |             |             |             |             |
| FKBP2       | FKBP2    | 2095.58328  | 2510.54158  | 2688.388672 |             |
| 1943.016457 |          |             |             |             |             |
| TTYH1       | TTYH1    | 24.59879758 | 7.109138778 | 5.357134518 | 0           |
| GSTCD       | GSTCD    | 679.3953618 | 730.2101117 | 490.1778084 |             |
| 390.300249  |          |             |             |             |             |
| SDK2        | SDK2     | 11.71371313 | 4.062365016 | 0           | 6.599279573 |
| STXBP3      | STXBP3   | 3901.837845 | 3762.765596 | 4686.599848 |             |
| 4662.862395 |          |             |             |             |             |
| PPP4C       | PPP4C    | 13836.23795 | 18243.0657  | 9581.235086 |             |
| 10202.48622 |          |             |             |             |             |
| PPP2CA      | PPP2CA   | 20209.66927 | 24176.1498  | 18643.72098 |             |
| 18053.7434  |          |             |             |             |             |
| PATL2       | PATL2    | 436.9214999 | 362.5660777 | 1176.783882 |             |
| 985.1781648 |          |             |             |             |             |
| C9orf47     | C9orf47  | 1.171371313 | 0           | 0           | 3.771016899 |
| TSSC4       | TSSC4    | 2929.599655 | 4656.4859   | 4577.671446 |             |
| 3227.990465 |          |             |             |             |             |
| B4GALNT4    | B4GALNT4 |             | 0           | 0           | 0           |
| ZNF688      | ZNF688   | 1201.826968 | 1431.983668 | 1468.747714 | 29.22538097 |
| 1099.251426 |          |             |             |             |             |
| C17orf50    | C17orf50 |             | 2.342742627 | 1.015591254 |             |

|                 |             |             |             |             |
|-----------------|-------------|-------------|-------------|-------------|
| 7.142846024     | 0           |             |             |             |
| PEX1 PEX1       | 1321.306842 | 1186.210585 | 1633.033172 |             |
| 1844.027264     |             |             |             |             |
| PORCN PORCN     | 507.2037787 | 778.9584919 | 458.0350013 |             |
| 308.2806315     |             |             |             |             |
| LRRC8C LRRC8C   | 10409.97686 | 7178.198984 | 5949.097882 |             |
| 6650.188301     |             |             |             |             |
| C2orf16 C2orf16 | 18.74194102 | 20.31182508 | 0           | 73.53482953 |
| UBQLN1 UBQLN1   | 7700.595015 | 11408.13656 | 9384.80682  |             |
| 8316.97777      |             |             |             |             |
| PDGFD PDGFD     | 2.342742627 | 0           | 0           | 11.3130507  |
| MRPL43 MRPL43   | 2602.787059 | 3108.724829 | 2917.852601 |             |
| 2471.901577     |             |             |             |             |
| CCDC28B CCDC28B | 648.9397077 | 1319.253039 | 420.5350597 |             |
| 365.7886392     |             |             |             |             |
| SLC35F5 SLC35F5 | 1359.962095 | 1082.620277 | 1176.783882 |             |
| 1140.732612     |             |             |             |             |
| CXXC4 CXXC4     | 0           | 9.140321286 | 0           | 0           |
| PGLYRP3 PGLYRP3 | 9.370970508 | 4.062365016 | 0           | 2.828262674 |
| RPL9 RPL9       | 8942.248607 | 10451.4496  | 13792.83567 |             |
| 11209.34773     |             |             |             |             |
| IARS IARS       | 20740.30048 | 23697.80632 | 20191.04    |             |
| 21672.97687     |             |             |             |             |
| ATP8A1 ATP8A1   | 1080.004351 | 424.5171442 | 633.0347289 |             |
| 1081.339096     |             |             |             |             |
| NBR1 NBR1       | 10230.75705 | 9596.32176  | 12623.19464 |             |
| 11313.0507      |             |             |             |             |
| RPS15AP10       | RPS15AP10   | 19.91331233 | 18.28064257 |             |
| 20.53568232     | 8.484788022 |             |             |             |
| LINC00263       | LINC00263   | 40.99799597 | 19.29623383 |             |
| 142.8569205     | 71.64932108 |             |             |             |
| FAM95B1 FAM95B1 | 1.171371313 | 0           | 0           | 0           |
| OIP5-AS1        | OIP5-AS1    | 5230.172915 | 5163.265936 |             |
| 3138.387972     | 2631.227041 |             |             |             |
| CYP4F35P        | CYP4F35P    | 4.685485254 | 0           | 0           |
| 15.0840676      |             |             |             |             |
| ZNRD1-AS1       | ZNRD1-AS1   | 35.1411394  | 8.124730032 |             |
| 5.357134518     | 49.96597391 |             |             |             |
| KIAA1841        | KIAA1841    | 677.0526192 | 501.7020795 |             |
| 157.1426125     | 257.3719033 |             |             |             |
| SC02 SC02       | 4036.545546 | 5616.219635 | 4262.493365 |             |
| 4994.711883     |             |             |             |             |
| ZNF680 ZNF680   | 515.4033779 | 470.2187506 | 756.2488228 |             |
| 746.661346      |             |             |             |             |
| TRIM3 TRIM3     | 92.53833376 | 37.5768764  | 273.2138604 |             |
| 246.0588527     |             |             |             |             |
| SET SET         | 17943.06578 | 13214.8734  | 12342.83793 |             |
| 12266.17522     |             |             |             |             |
| LARGE LARGE     | 1.171371313 | 10.15591254 | 60.71419121 |             |
| 24.51160984     |             |             |             |             |

|              |              |             |             |             |             |
|--------------|--------------|-------------|-------------|-------------|-------------|
| RHOV         | RHOV         | 3.51411394  | 17.26505132 | 5.357134518 |             |
| 5.656525348  |              |             |             |             |             |
| NOP14        | NOP14        | 4759.281647 | 5877.226587 | 5938.383613 |             |
| 6095.848817  |              |             |             |             |             |
| ADCY10       | ADCY10       | 0           | 4.062365016 | 0.892855753 | 0           |
| CNTFR        | CNTFR        | 2.342742627 | 0           | 0           | 0           |
| WAS          | WAS          | 2004.216317 | 725.1321554 | 400.8922331 |             |
| 623.1605425  |              |             |             |             |             |
| IQSEC3       | IQSEC3       | 2.342742627 | 10.15591254 | 113.3926806 | 0           |
| CYP51A1      | CYP51A1      | 1987.817119 | 2515.619536 | 3513.387388 |             |
| 4046.301132  |              |             |             |             |             |
| AVPR2        | AVPR2        | 3.51411394  | 0           | 0           | 0           |
| NEFM         | NEFM         | 4.685485254 | 1.015591254 | 34.82137437 |             |
| 54.67974503  |              |             |             |             |             |
| ZNF595       | ZNF595       | 215.5323217 | 277.2564124 | 537.4991633 |             |
| 438.3807145  |              |             |             |             |             |
| RAD21-AS1    | RAD21-AS1    |             | 251.8448324 | 215.3053459 |             |
| 104.4641231  | 139.5276253  |             |             |             |             |
| GTPBP3       | GTPBP3       | 1521.611336 | 1171.992307 | 1163.391046 |             |
| 1790.290273  |              |             |             |             |             |
| CCNG2        | CCNG2        | 1741.829143 | 877.4708435 | 991.0698859 |             |
| 1145.446383  |              |             |             |             |             |
| RRP1         | RRP1         | 3237.67031  | 5327.791719 | 3950.886707 |             |
| 4039.701853  |              |             |             |             |             |
| PCDHGA11     | PCDHGA11     |             | 8.199599194 | 22.34300759 |             |
| 9.821413283  | 22.62610139  |             |             |             |             |
| TFAP4        | TFAP4        | 99.56656164 | 16.24946006 | 12.49998054 |             |
| 49.96597391  |              |             |             |             |             |
| C16orf89     | C16orf89     |             | 0           | 0           | 2.678567259 |
| 0.942754225  |              |             |             |             |             |
| SCCPDH       | SCCPDH       | 2083.869567 | 1811.814797 | 1037.498385 |             |
| 1681.873537  |              |             |             |             |             |
| NUDT13       | NUDT13       | 73.79639275 | 91.40321286 | 166.0711701 |             |
| 44.30944856  |              |             |             |             |             |
| LOC101927164 | LOC101927164 |             | 134.707701  | 194.9935208 |             |
| 156.2497568  | 150.840676   |             |             |             |             |
| BAG4         | BAG4         | 2224.434124 | 1863.609951 | 1508.926223 |             |
| 1852.512052  |              |             |             |             |             |
| HSD17B7      | HSD17B7      | 848.0728309 | 1469.560545 | 1574.997548 |             |
| 1186.927569  |              |             |             |             |             |
| CILP         | CILP         | 0           | 5.07795627  | 0.892855753 | 31.11088942 |
| THEMIS       | THEMIS       | 5436.334266 | 4146.65909  | 4770.528288 |             |
| 3832.295923  |              |             |             |             |             |
| LOC100507053 | LOC100507053 |             | 19.91331233 | 19.29623383 |             |
| 28.5713841   | 37.71016899  |             |             |             |             |
| LOC257396    | LOC257396    |             | 156.963756  | 140.1515931 |             |
| 265.1781587  | 206.4631752  |             |             |             |             |
| LOC100630923 | LOC100630923 |             | 1299.050787 | 1550.807845 |             |
| 2272.317891  | 1911.905568  |             |             |             |             |
| LINC00880    | LINC00880    |             | 256.5303176 | 137.1048193 |             |



|                 |              |             |             |   |
|-----------------|--------------|-------------|-------------|---|
| 132.1426514     | 78.24860065  |             |             |   |
| LOC642236       | LOC642236    | 21.08468364 | 9.140321286 |   |
| 28.5713841      | 21.68334717  |             |             |   |
| LOC648987       | LOC648987    | 303.3851702 | 275.2252298 |   |
| 966.0699248     | 642.9583813  |             |             |   |
| SPG200S SPG200S | 25.7701689   | 22.34300759 | 24.99996108 |   |
| 33.93915209     |              |             |             |   |
| LOC100507501    | LOC100507501 | 87.85284851 | 49.76397145 |   |
| 206.249679      | 154.6116929  |             |             |   |
| MCF2L-AS1       | MCF2L-AS1    | 2.342742627 | 6.093547524 |   |
| 49.10706642     | 93.33266825  |             |             |   |
| GOLGA8T GOLGA8T | 0 0          | 1.785711506 | 0.942754225 |   |
| LINC00996       | LINC00996    | 43.3407386  | 37.5768764  |   |
| 43.7499319      | 41.48118589  |             |             |   |
| ASAP1-IT2       | ASAP1-IT2    | 4.685485254 | 1.015591254 |   |
| 6.249990271     | 12.25580492  |             |             |   |
| SENP1 SENP1     | 4179.452846  | 3572.850032 | 2529.460348 |   |
| 3548.526902     |              |             |             |   |
| GATAD1 GATAD1   | 482.6049811  | 383.893494  | 680.3560838 |   |
| 730.6345242     |              |             |             |   |
| ST8SIA6-AS1     | ST8SIA6-AS1  | 3.51411394  | 19.29623383 |   |
| 4.464278765     | 2.828262674  |             |             |   |
| LINC00944       | LINC00944    | 32.79839678 | 13.2026863  |   |
| 161.6068913     | 236.6313104  |             |             |   |
| PRRC1 PRRC1     | 3712.075692  | 4011.585454 | 3532.137359 |   |
| 3765.360374     |              |             |             |   |
| MIR1292 MIR1292 | 458.0061836  | 575.840241  | 606.2490563 |   |
| 570.366306      |              |             |             |   |
| SMAD9 SMAD9     | 49.19759517  | 12.18709505 | 21.42853807 |   |
| 69.76381263     |              |             |             |   |
| TMEM179B        | TMEM179B     | 4277.848037 | 4720.468149 |   |
| 4533.921514     | 4306.501299  |             |             |   |
| PIP5K1C PIP5K1C | 1526.296821  | 1109.025649 | 1207.140978 |   |
| 1383.020448     |              |             |             |   |
| AP5S1 AP5S1     | 1420.873403  | 1854.46963  | 817.8558698 |   |
| 1018.174563     |              |             |             |   |
| TEX29 TEX29     | 16.39919839  | 4.062365016 | 8.92855753  |   |
| 16.02682182     |              |             |             |   |
| C12orf54        | C12orf54     | 7.028227881 | 5.07795627  | 0 |
| 0               |              |             |             |   |
| ZNF746 ZNF746   | 1888.250557  | 1941.810478 | 1676.783104 |   |
| 1631.907563     |              |             |             |   |
| C7orf60 C7orf60 | 440.4356139  | 385.9246765 | 809.820168  |   |
| 675.9547791     |              |             |             |   |
| DYNLRB2 DYNLRB2 | 44.51210991  | 14.21827756 | 37.49994163 |   |
| 16.96957604     |              |             |             |   |
| FRMD5 FRMD5     | 325.6412251  | 152.3386881 | 48.21421066 |   |
| 125.3863119     |              |             |             |   |
| NTN5 NTN5       | 3.51411394   | 1.015591254 | 5.357134518 |   |
| 9.427542247     |              |             |             |   |

|             |             |             |             |             |             |
|-------------|-------------|-------------|-------------|-------------|-------------|
| ZNF446      | ZNF446      | 340.8690522 | 368.6596252 | 467.8564146 |             |
| 508.1445271 |             |             |             |             |             |
| RNASEH2C    | RNASEH2C    |             | 4766.309874 | 5688.326614 |             |
| 5567.848476 | 4973.028535 |             |             |             |             |
| PLA2G12A    | PLA2G12A    |             | 640.7401085 | 982.0767427 |             |
| 874.998638  | 924.8418944 |             |             |             |             |
| ZFYVE9      | ZFYVE9      | 16.39919839 | 41.63924142 | 232.1424958 |             |
| 231.9175393 |             |             |             |             |             |
| PFN2        | PFN2        | 17.5705697  | 20.31182508 | 244.6424763 |             |
| 89.56165135 |             |             |             |             |             |
| CHD5        | CHD5        | 3.51411394  | 9.140321286 | 0           | 0           |
| DNAH1       | DNAH1       | 249.5020898 | 134.0580455 | 199.9996887 |             |
| 227.2037682 |             |             |             |             |             |
| PPP1R10     | PPP1R10     | 2.342742627 | 0           | 1.785711506 | 3.771016899 |
| TAL2        | TAL2        | 1.171371313 | 4.062365016 | 6.249990271 |             |
| 8.484788022 |             |             |             |             |             |
| PITX1       | PITX1       | 1.171371313 | 21.32741634 | 14.28569205 | 0           |
| TFCP2       | TFCP2       | 1668.03275  | 1199.413271 | 1067.855481 |             |
| 1219.923967 |             |             |             |             |             |
| NPAS1       | NPAS1       | 17.5705697  | 20.31182508 | 3.571423012 |             |
| 2.828262674 |             |             |             |             |             |
| RPL5        | RPL5        | 21453.66561 | 23331.17788 | 22912.46433 |             |
| 24285.34883 |             |             |             |             |             |
| ST8SIA1     | ST8SIA1     | 62.08267961 | 57.88870148 | 121.4283824 |             |
| 143.2986422 |             |             |             |             |             |
| FLG         | FLG         | 0           | 0           | 0.892855753 | 11.3130507  |
| CYC1        | CYC1        | 12418.87867 | 21096.87712 | 11015.16143 |             |
| 10117.63834 |             |             |             |             |             |
| FOXO1       | FOXO1       | 4817.850212 | 5941.208836 | 7066.060429 |             |
| 6831.197112 |             |             |             |             |             |
| SF3B4       | SF3B4       | 8338.992381 | 9141.336878 | 5960.705007 |             |
| 6192.009748 |             |             |             |             |             |
| CYP2E1      | CYP2E1      | 4.685485254 | 11.17150379 | 0           | 0.942754225 |
| HDAC3       | HDAC3       | 7503.804634 | 9325.158895 | 5771.419588 |             |
| 6602.107836 |             |             |             |             |             |
| PCDHGB4     | PCDHGB4     | 5.856856567 | 14.21827756 | 9.821413283 |             |
| 12.25580492 |             |             |             |             |             |
| PCDHGA12    | PCDHGA12    |             | 0           | 15.23386881 | 9.821413283 |
| 12.25580492 |             |             |             |             |             |
| EFNB1       | EFNB1       | 460.3489262 | 625.6042125 | 791.0701972 |             |
| 388.4147406 |             |             |             |             |             |
| PHC1        | PHC1        | 2236.147837 | 2558.274369 | 3667.851433 |             |
| 4218.825156 |             |             |             |             |             |
| ATP5E       | ATP5E       | 15671.7768  | 13560.17442 | 10260.69831 |             |
| 11064.16358 |             |             |             |             |             |
| GLTSCR1L    | GLTSCR1L    |             | 923.040595  | 417.4080054 |             |
| 758.0345343 | 657.0996946 |             |             |             |             |
| TMEM131     | TMEM131     | 3078.363812 | 1867.672316 | 2136.603817 |             |
| 2117.425989 |             |             |             |             |             |
| ADSS        | ADSS        | 3630.0797   | 3218.408684 | 3298.209152 |             |

|              |              |             |             |             |
|--------------|--------------|-------------|-------------|-------------|
| 3948.254693  |              |             |             |             |
| CCZ1B        | CCZ1B        | 1050.720068 | 1633.070737 | 1097.31972  |
| 819.2534213  |              |             |             |             |
| CCT5         | CCT5         | 26952.08255 | 37260.01193 | 22009.78717 |
| 25075.37687  |              |             |             |             |
| LOC101928035 | LOC101928035 | 0           | 0           | 0           |
| LOC101928248 | LOC101928248 | 9.370970508 | 5.07795627  | 0           |
|              |              | 2.828262674 |             |             |
| MAST2        | MAST2        | 2780.835498 | 2403.904498 | 1698.211642 |
| 1584.769852  |              |             |             |             |
| PUS1         | PUS1         | 1458.357285 | 1652.36697  | 949.1056655 |
| 986.1209191  |              |             |             |             |
| TRPS1        | TRPS1        | 894.9276835 | 226.4768497 | 288.3924082 |
| 669.3554995  |              |             |             |             |
| CCDC51       | CCDC51       | 1706.688004 | 2900.528622 | 1776.782949 |
| 1449.955998  |              |             |             |             |
| LOC730183    | LOC730183    |             | 114.7943887 | 72.10697904 |
| 97.32127708  |              | 98.04643937 |             |             |
| SLC35G6      | SLC35G6      | 9.370970508 | 9.140321286 | 0           |
| GRAMD3       | GRAMD3       | 1259.224162 | 1092.776189 | 8.484788022 |
| 1044.571681  |              |             |             | 804.4630335 |
| RAD23B       | RAD23B       | 1087.032579 | 485.4526194 | 600.8919218 |
| 807.9403706  |              |             |             |             |
| TAF13        | TAF13        | 66.76816487 | 49.76397145 | 45.5356434  |
| 82.01961755  |              |             |             |             |
| TAF12        | TAF12        | 2634.414084 | 3211.299545 | 2873.209813 |
| 2447.389967  |              |             |             |             |
| THG1L        | THG1L        | 561.0868591 | 834.8160108 | 791.9630529 |
| 675.0120249  |              |             |             |             |
| ANKRD10      | ANKRD10      | 5883.798108 | 3596.208631 | 2829.459881 |
| 4045.358378  |              |             |             |             |
| GABARAPL2    | GABARAPL2    |             | 6113.386885 | 4786.48158  |
| 5563.384197  |              | 5962.920471 |             |             |
| MRPL27       | MRPL27       | 4317.674661 | 6655.169488 | 2512.496089 |
| 2760.38437   |              |             |             |             |
| VAMP2        | VAMP2        | 1700.831147 | 1375.110558 | 3849.994007 |
| 3160.112161  |              |             |             |             |
| NXF1         | NXF1         | 6101.673172 | 6406.349631 | 9946.413089 |
| 8782.698357  |              |             |             |             |
| MRPS2        | MRPS2        | 2897.97263  | 4733.670835 | 3058.92381  |
| 2874.457631  |              |             |             |             |
| SMG6         | SMG6         | 2931.942398 | 2604.991567 | 2866.066967 |
| 2224.89997   |              |             |             |             |
| THOC1        | THOC1        | 2719.92419  | 2717.722196 | 2324.103525 |
| 2865.972843  |              |             |             |             |
| SPTBN1       | SPTBN1       | 20107.75997 | 9738.504535 | 4268.743355 |
| 5144.609804  |              |             |             |             |
| VSIG1        | VSIG1        | 50.36896648 | 70.07579653 | 245.5353321 |
| 157.4399555  |              |             |             |             |
| ARL9         | ARL9         | 1.171371313 | 7.109138778 | 5.357134518 |

|             |           |             |             |             |             |
|-------------|-----------|-------------|-------------|-------------|-------------|
| 10.37029647 |           |             |             |             |             |
| CRIP3       | CRIP3     | 4.685485254 | 7.109138778 | 7.142846024 |             |
| 7.542033798 |           |             |             |             |             |
| PBLD        | PBLD      | 64.42542224 | 106.6370817 | 108.9284019 |             |
| 53.73699081 |           |             |             |             |             |
| NKIRAS2     | NKIRAS2   | 2082.698195 | 2609.053932 | 2108.032433 |             |
| 2314.461622 |           |             |             |             |             |
| ATAD3C      | ATAD3C    | 18.74194102 | 18.28064257 | 16.96425931 |             |
| 25.45436407 |           |             |             |             |             |
| AMIG02      | AMIG02    | 832.8450039 | 582.9493798 | 2218.746546 |             |
| 1662.075698 |           |             |             |             |             |
| MIR4435-1   | MIR4435-1 |             | 7.028227881 | 3.046773762 | 0           |
| 10.37029647 |           |             |             |             |             |
| MIR4434     | MIR4434   | 17.5705697  | 9.140321286 | 11.60712479 |             |
| 19.79783872 |           |             |             |             |             |
| MIR4420     | MIR4420   | 2.342742627 | 2.031182508 | 3.571423012 |             |
| 5.656525348 |           |             |             |             |             |
| MIR378E     | MIR378E   | 3.51411394  | 0           | 5.656525348 |             |
| MIR54802    | MIR54802  |             | 1.171371313 | 0           | 0           |
| 0.942754225 |           |             |             |             |             |
| AFF1        | AFF1      | 1564.952075 | 690.6020528 | 1397.319253 |             |
| 1314.199389 |           |             |             |             |             |
| UPP2        | UPP2      | 2.342742627 | 0           | 4.464278765 | 0           |
| SIK1        | SIK1      | 28.11291152 | 30.46773762 | 74.1070275  |             |
| 49.02321969 |           |             |             |             |             |
| FAM149B1    | FAM149B1  |             | 413.4940737 | 269.1316823 |             |
| 304.4638118 |           | 425.1821553 |             |             |             |
| FGFR3       | FGFR3     | 19.91331233 | 2.031182508 | 3.571423012 |             |
| 16.02682182 |           |             |             |             |             |
| COX11       | COX11     | 2610.986658 | 3690.658617 | 2540.174617 |             |
| 2404.966027 |           |             |             |             |             |
| CALR        | CALR      | 18664.63051 | 15900.09667 | 10150.87706 |             |
| 11628.87336 |           |             |             |             |             |
| CALD1       | CALD1     | 3.51411394  | 15.23386881 | 72.321316   |             |
| 51.85148236 |           |             |             |             |             |
| CAD         | CAD       | 7517.86109  | 5124.673468 | 4724.099789 |             |
| 5729.117424 |           |             |             |             |             |
| SHARPIN     | SHARPIN   | 2068.64174  | 3283.406524 | 3040.173839 |             |
| 2638.769075 |           |             |             |             |             |
| NDUFB4      | NDUFB4    | 6764.669335 | 5967.614209 | 4449.100217 |             |
| 5423.665055 |           |             |             |             |             |
| ERMP1       | ERMP1     | 4260.277467 | 3261.063517 | 1136.605374 |             |
| 1983.554889 |           |             |             |             |             |
| MY03A       | MY03A     | 0           | 1.785711506 | 0           |             |
| PHKG2       | PHKG2     | 2152.980474 | 3020.36839  | 2977.673936 |             |
| 2233.384758 |           |             |             |             |             |
| SH2D5       | SH2D5     | 3.51411394  | 0           | 0.892855753 | 12.25580492 |
| SCGB2B3P    | SCGB2B3P  |             | 1.171371313 | 0           | 4.464278765 |
| 3.771016899 |           |             |             |             |             |
| SPEG        | SPEG      | 2.342742627 | 7.109138778 | 17.85711506 |             |

|             |             |             |             |             |
|-------------|-------------|-------------|-------------|-------------|
| 14.14131337 |             |             |             |             |
| PSMG1       | PSMG1       | 3394.634066 | 4833.198778 | 2498.210397 |
| 3017.756273 |             |             |             |             |
| SNORD56B    | SNORD56B    | 0           | 5.07795627  | 1.785711506 |
| 3.771016899 |             |             |             |             |
| SNORD83B    | SNORD83B    | 28.11291152 |             | 29.45214637 |
| 63.39275847 | 64.10728728 |             |             |             |
| SNORD83A    | SNORD83A    | 21.08468364 |             | 13.2026863  |
| 53.57134518 | 44.30944856 |             |             |             |
| RNU86       | RNU86       | 121.8226166 | 218.3521196 | 266.0710144 |
| 186.6653365 |             |             |             |             |
| TSPY26P     | TSPY26P     | 19.91331233 | 16.24946006 | 79.46416202 |
| 31.11088942 |             |             |             |             |
| SNORD32A    | SNORD32A    | 18.74194102 |             | 18.28064257 |
| 72.321316   | 39.59567744 |             |             |             |
| SNORD33     | SNORD33     | 2.342742627 | 4.062365016 | 11.60712479 |
| 10.37029647 |             |             |             |             |
| SNORD34     | SNORD34     | 19.91331233 | 10.15591254 | 40.17850889 |
| 37.71016899 |             |             |             |             |
| SNORD35A    | SNORD35A    | 8.199599194 |             | 16.24946006 |
| 25.89281684 | 21.68334717 |             |             |             |
| SNORD36B    | SNORD36B    | 15.22782708 |             | 15.23386881 |
| 7.142846024 | 16.02682182 |             |             |             |
| SNORD36C    | SNORD36C    | 22.25605496 |             | 10.15591254 |
| 17.85711506 | 26.39711829 |             |             |             |
| ISY1-RAB43  | ISY1-RAB43  | 4482.838017 |             | 5119.595512 |
| 4635.70707  | 4262.19185  |             |             |             |
| SLC4A2      | SLC4A2      | 3307.952589 | 2288.127095 | 1350.890754 |
| 1745.980824 |             |             |             |             |
| HDX         | HDX         | 165.1633552 | 197.0247033 | 100.8927001 |
| 118.7870323 |             |             |             |             |
| PIGH        | PIGH        | 1167.8572   | 1716.349219 | 2899.10263  |
| 1791.233027 |             |             |             |             |
| RAP2B       | RAP2B       | 3913.551558 | 2646.630808 | 2031.246838 |
| 2167.391963 |             |             |             |             |
| RDH8        | RDH8        | 0           | 0           | 10.37029647 |
| KDELC1      | KDELC1      | 821.1312907 | 969.8896476 | 239.2853418 |
| 329.0212244 |             |             |             |             |
| DGUOK       | DGUOK       | 4563.662637 | 5675.123928 | 5613.384119 |
| 5177.606202 |             |             |             |             |
| SP1         | SP1         | 2504.391868 | 989.1858814 | 1480.354839 |
| 2200.38836  |             |             |             |             |
| THOC2       | THOC2       | 5854.513825 | 4869.760063 | 5366.063076 |
| 6479.549786 |             |             |             |             |
| KLHL18      | KLHL18      | 2014.758659 | 2547.102865 | 1894.639908 |
| 1957.157771 |             |             |             |             |
| MRAS        | MRAS        | 0           | 0           | 6.249990271 |
| POLR2A      | POLR2A      | 19368.62467 | 13083.86213 | 15708.90412 |
| 15437.60043 |             |             |             |             |
| COL1A1      | COL1A1      | 19.91331233 | 16.24946006 | 46.42849916 |

|              |              |             |             |             |             |             |
|--------------|--------------|-------------|-------------|-------------|-------------|-------------|
| 6.599279573  |              |             |             |             |             |             |
| SPRED3       | SPRED3       | 12.88508445 | 0           | 8.92855753  | 0.942754225 |             |
| CNIH2        | CNIH2        | 11.71371313 | 3.046773762 | 11.60712479 |             |             |
| 6.599279573  |              |             |             |             |             |             |
| DIRAS3       | DIRAS3       | 5.856856567 | 6.093547524 | 0           | 22.62610139 |             |
| ASH2L        | ASH2L        | 5284.055995 | 6182.919555 | 4962.492275 |             |             |
| 5158.751118  |              |             |             |             |             |             |
| PIAS2        | PIAS2        | 1885.907815 | 1816.892753 | 1635.71174  |             |             |
| 1946.787474  |              |             |             |             |             |             |
| UPP1         | UPP1         | 1279.137474 | 2859.904971 | 2807.138488 |             |             |
| 1802.546078  |              |             |             |             |             |             |
| CCNF         | CCNF         | 12372.02381 | 14339.13292 | 3844.636873 |             |             |
| 5814.908058  |              |             |             |             |             |             |
| HNRNPA0      | HNRNPA0      | 2971.769022 | 1866.656725 | 2242.853652 |             |             |
| 2713.246659  |              |             |             |             |             |             |
| IGFBP3       | IGFBP3       | 53.88308042 | 95.46557788 | 276.7852834 |             |             |
| 238.5168189  |              |             |             |             |             |             |
| IGFBP2       | IGFBP2       | 1.171371313 | 0           | 44.64278765 | 22.62610139 |             |
| NPAT         | NPAT         | 4233.335927 | 3524.101652 | 6641.953947 |             |             |
| 6443.725126  |              |             |             |             |             |             |
| MPV17        | MPV17        | 4772.166731 | 5756.371228 | 4061.600821 |             |             |
| 4555.388414  |              |             |             |             |             |             |
| PABPN1       | PABPN1       | 7918.470079 | 5355.212683 | 5607.134129 |             |             |
| 5489.657851  |              |             |             |             |             |             |
| SLC1A6       | SLC1A6       | 0           | 0           | 0.942754225 |             |             |
| SURF4        | SURF4        | 30283.46257 | 42568.50741 | 19970.50463 |             |             |
| 25675.91131  |              |             |             |             |             |             |
| TMEM249      | TMEM249      | 178.0484396 | 191.946747  | 149.9997665 |             |             |
| 164.0392351  |              |             |             |             |             |             |
| SQRDL        | SQRDL        | 14088.08279 | 20225.49982 | 14796.40554 |             |             |
| 13554.92024  |              |             |             |             |             |             |
| SNORD98      | SNORD98      | 3.51411394  | 4.062365016 | 27.67852834 |             |             |
| 11.3130507   |              |             |             |             |             |             |
| SNORD99      | SNORD99      | 16.39919839 | 4.062365016 | 24.99996108 |             |             |
| 12.25580492  |              |             |             |             |             |             |
| SNORD110     | SNORD110     |             | 92.53833376 | 58.90429273 |             |             |
| 167.8568816  |              | 151.7834302 |             |             |             |             |
| SNORD111     | SNORD111     |             | 2.342742627 | 0           | 0           |             |
| 0.942754225  |              |             |             |             |             |             |
| HULC         | HULC         | 0           | 0           | 0.942754225 |             |             |
| FLG-AS1      | FLG-AS1      | 0           | 0           | 2.828262674 |             |             |
| LOC101929412 | LOC101929412 |             | 0           | 2.031182508 | 0           | 0           |
| CHRM3-AS2    | CHRM3-AS2    |             | 294.0141997 | 319.911245  |             |             |
| 312.4995136  |              | 303.5668604 |             |             |             |             |
| XXYLT1-AS1   | XXYLT1-AS1   |             | 0           | 0           | 0           | 0.942754225 |
| LOC440416    | LOC440416    |             | 1.171371313 | 0           | 0           | 0           |
| PDK1         | PDK1         | 1140.915659 | 1164.883168 | 1889.282773 |             |             |
| 2059.917981  |              |             |             |             |             |             |
| CCS          | CCS          | 1173.714056 | 1082.620277 | 1446.42632  |             |             |
| 1369.821889  |              |             |             |             |             |             |

|              |              |             |   |             |             |             |
|--------------|--------------|-------------|---|-------------|-------------|-------------|
| MRGPRF       | MRGPRF       | 0           | 0 | 0           | 4.713771124 |             |
| TINAGL1      | TINAGL1      | 2.342742627 |   | 5.07795627  | 0           | 0           |
| TRIM45       | TRIM45       | 52.71170911 |   | 29.45214637 | 39.28565313 |             |
|              |              |             |   | 4.713771124 |             |             |
| ZDHHC7       | ZDHHC7       | 3299.75299  |   | 3257.001152 | 3322.316257 |             |
|              |              |             |   | 3460.850759 |             |             |
| LRRC15       | LRRC15       | 0           | 0 | 0           | 0.942754225 |             |
| TKT          | TKT          | 7848.1878   |   | 8369.487525 | 3946.422428 |             |
|              |              |             |   | 5156.865609 |             |             |
| POLD2        | POLD2        | 7788.447863 |   | 11176.58175 | 7835.702089 |             |
|              |              |             |   | 7691.931719 |             |             |
| ZNF619       | ZNF619       | 340.8690522 |   | 369.6752165 | 584.8205182 |             |
|              |              |             |   | 483.6329173 |             |             |
| CD84         | CD84         | 3640.622042 |   | 3205.205998 | 4466.064477 |             |
|              |              |             |   | 4792.019724 |             |             |
| LIM2         | LIM2         | 0           | 0 | 0           | 0.942754225 |             |
| IL11RA       | IL11RA       | 187.4194102 |   | 227.4924409 | 239.2853418 |             |
|              |              |             |   | 201.7494041 |             |             |
| MOGS         | MOGS         | 3958.063668 |   | 2755.299072 | 3077.673781 |             |
|              |              |             |   | 3932.227871 |             |             |
| ZNF473       | ZNF473       | 579.8288002 |   | 619.510665  | 2200.889431 |             |
|              |              |             |   | 1160.530451 |             |             |
| RLIM         | RLIM         | 1819.13965  |   | 1322.299813 | 2245.532219 |             |
|              |              |             |   | 2269.209419 |             |             |
| LOC100134391 | LOC100134391 |             |   | 0           | 0           | 8.92855753  |
| TUBA1A       | TUBA1A       | 9631.014939 |   | 11432.51075 | 8212.487216 | 0           |
|              |              |             |   | 7427.017782 |             |             |
| C3orf52      | C3orf52      | 127.6794732 |   | 208.1962071 | 212.4996692 |             |
|              |              |             |   | 106.5312274 |             |             |
| EFCAB9       | EFCAB9       | 1.171371313 |   | 2.031182508 | 2.678567259 | 0           |
| WWC3         | WWC3         | 1341.220154 |   | 1218.709505 | 1746.425853 |             |
|              |              |             |   | 1834.599721 |             |             |
| KAT5         | KAT5         | 3419.232864 |   | 4511.25635  | 5879.455134 |             |
|              |              |             |   | 4332.898417 |             |             |
| VTI1A        | VTI1A        | 1794.540852 |   | 2020.011004 | 1616.961769 |             |
|              |              |             |   | 1777.091714 |             |             |
| ELMOD1       | ELMOD1       | 4.685485254 |   | 5.07795627  | 0           | 4.713771124 |
| LE01         | LE01         | 3286.867906 |   | 4128.378448 | 2878.566948 |             |
|              |              |             |   | 3304.353558 |             |             |
| WRB          | WRB          | 1793.369481 |   | 1717.364811 | 1132.141095 |             |
|              |              |             |   | 1319.855915 |             |             |
| PKP4         | PKP4         | 441.6069852 |   | 136.089228  | 79.46416202 |             |
|              |              |             |   | 214.005209  |             |             |
| RPE65        | RPE65        | 0           | 0 | 0           | 2.828262674 |             |
| TTC28        | TTC28        | 55.05445173 |   | 10.15591254 | 69.64274874 |             |
|              |              |             |   | 49.96597391 |             |             |
| ASCC1        | ASCC1        | 2648.47054  |   | 3184.894173 | 3315.173411 |             |
|              |              |             |   | 2676.479244 |             |             |
| XG           | XG           | 0           | 0 | 1.785711506 | 0           |             |
| ZNF835       | ZNF835       | 1.171371313 |   | 7.109138778 | 100.8927001 |             |

|                 |               |               |               |  |
|-----------------|---------------|---------------|---------------|--|
| 144.2413964     |               |               |               |  |
| MEF2B MEF2B     | 111.2802748   | 105.6214904   | 175.8925833   |  |
| 126.3290661     |               |               |               |  |
| RBM14-RBM4      | RBM14-RBM4    | 6532.737815   | 8334.957422   |  |
| 7693.738024     | 6784.059401   |               |               |  |
| POU5F1B POU5F1B | 0 0           | 0.892855753   | 0             |  |
| FYTTD1 FYTTD1   | 4532.035612   | 5170.375074   | 7543.738257   |  |
| 5886.557379     |               |               |               |  |
| TMIE TMIE       | 0 1.015591254 | 15.1785478    | 11.3130507    |  |
| LOC100132057    | LOC100132057  | 14.05645576   | 13.2026863    |  |
| 54.46420093     | 28.28262674   |               |               |  |
| PIGC PIGC       | 1864.823131   | 2135.788407   | 3423.208957   |  |
| 2629.341533     |               |               |               |  |
| FNDC5 FNDC5     | 9.370970508   | 3.046773762   | 16.07140355   |  |
| 2.828262674     |               |               |               |  |
| DPYD-AS1        | DPYD-AS1      | 168.6774691   | 295.5370549   |  |
| 227.678217      | 211.1769463   |               |               |  |
| LAMTOR4 LAMTOR4 | 4482.838017   | 5427.319662   | 4693.742694   |  |
| 4306.501299     |               |               |               |  |
| FSD1 FSD1       | 882.042599    | 924.1880412   | 267.8567259   |  |
| 554.3394841     |               |               |               |  |
| CD300A CD300A   | 134.707701    | 126.9489068   | 261.6067356   |  |
| 205.520421      |               |               |               |  |
| SPCS3 SPCS3     | 7677.167588   | 6956.80009    | 5079.456379   |  |
| 7027.289991     |               |               |               |  |
| FILIP1 FILIP1   | 3.51411394    | 0 7.142846024 | 5.656525348   |  |
| ATP6V0E2        | ATP6V0E2      | 5038.068019   | 8649.790711   |  |
| 5522.312832     | 3688.997281   |               |               |  |
| IFRD1 IFRD1     | 2308.772859   | 2163.209371   | 3261.602066   |  |
| 2970.618562     |               |               |               |  |
| PTH2R PTH2R     | 15.22782708   | 12.18709505   | 0 3.771016899 |  |
| MRPL39 MRPL39   | 4070.515314   | 4850.463829   | 3375.887602   |  |
| 3533.442834     |               |               |               |  |
| NSRP1 NSRP1     | 1103.431777   | 1300.972396   | 1518.747636   |  |
| 1346.253033     |               |               |               |  |
| RNF121 RNF121   | 834.0163752   | 694.6644178   | 583.0348067   |  |
| 727.8062615     |               |               |               |  |
| PLCB4 PLCB4     | 0 0           | 1.785711506   | 0             |  |
| 2-Mar 2-Mar     | 954.6676205   | 1505.106239   | 1112.498268   |  |
| 922.956386      |               |               |               |  |
| IBA57 IBA57     | 648.9397077   | 902.8606249   | 632.1418731   |  |
| 515.6865609     |               |               |               |  |
| CRTAM CRTAM     | 152.2782708   | 640.8380813   | 4249.993384   |  |
| 1383.020448     |               |               |               |  |
| SDCCAG3 SDCCAG3 | 598.5707412   | 546.3880947   | 672.320382    |  |
| 822.081684      |               |               |               |  |
| TP53BP2 TP53BP2 | 2876.887946   | 2083.993253   | 3882.136814   |  |
| 3453.308725     |               |               |               |  |
| NCAPH NCAPH     | 8005.151556   | 6973.04955    | 2662.495856   |  |
| 4446.971678     |               |               |               |  |



|              |              |             |             |             |
|--------------|--------------|-------------|-------------|-------------|
| RCCD1        | RCCD1        | 1117.488233 | 1122.228336 | 695.5346316 |
| 956.8955381  |              |             |             |             |
| CDK11A       | CDK11A       | 1365.818951 | 1111.056832 | 1716.961613 |
| 1274.603712  |              |             |             |             |
| RASA4        | RASA4        | 108.9375322 | 183.822017  | 287.4995525 |
| 209.2914379  |              |             |             |             |
| JAKMIP3      | JAKMIP3      | 0           | 9.140321286 | 0           |
| 9.427542247  |              |             |             |             |
| GPR107       | GPR107       | 1795.712224 | 1041.996627 | 931.2485504 |
| 893.731005   |              |             |             |             |
| SLC35G2      | SLC35G2      | 59.73993699 | 190.9311558 | 291.0709755 |
| 131.0428372  |              |             |             |             |
| SLC26A6      | SLC26A6      | 1755.885599 | 1636.11751  | 635.7132962 |
| 1183.156552  |              |             |             |             |
| RAB37        | RAB37        | 3941.66447  | 3681.518296 | 433.927896  |
| 620.3322799  |              |             |             |             |
| RCN2         | RCN2         | 3612.509131 | 3404.261884 | 3704.458519 |
| 3741.791518  |              |             |             |             |
| FGD1         | FGD1         | 202.6472372 | 169.6037394 | 456.2492898 |
| 325.2502075  |              |             |             |             |
| ANKRD26      | ANKRD26      | 596.2279986 | 628.6509863 | 634.8204404 |
| 543.9691877  |              |             |             |             |
| SLC4A9       | SLC4A9       | 8.199599194 | 2.031182508 | 0           |
| 4.713771124  |              |             |             |             |
| APPL2        | APPL2        | 1753.542856 | 1297.925623 | 1178.569594 |
| 1521.605319  |              |             |             |             |
| NAALADL1     | NAALADL1     |             | 397.0948753 | 335.1451138 |
| 372.320849   |              |             |             |             |
| ANKRD18A     | ANKRD18A     |             | 5.856856567 | 2.031182508 |
| 58.03562395  |              |             |             |             |
| CDPF1        | CDPF1        | 671.1957626 | 821.6133245 | 911.6057238 |
| 692.9243552  |              |             |             |             |
| ZNF474       | ZNF474       | 2.342742627 | 2.031182508 | 0           |
| 0            |              |             |             |             |
| TUBA3E       | TUBA3E       | 3.51411394  | 5.07795627  | 2.678567259 |
| 6.599279573  |              |             |             |             |
| DMRT2        | DMRT2        | 2.342742627 | 29.45214637 | 0           |
| 0            |              |             |             |             |
| TARDBP       | TARDBP       | 13108.81637 | 13586.5798  | 11486.58926 |
| 13179.70406  |              |             |             |             |
| SHOC2        | SHOC2        | 4539.06384  | 4115.175761 | 5831.240923 |
| 4967.37201   |              |             |             |             |
| SKA3         | SKA3         | 4111.51331  | 5004.8337   | 2135.710961 |
| 2618.028482  |              |             |             |             |
| RNF103-CHMP3 | RNF103-CHMP3 |             | 1991.331233 | 2613.116297 |
| 3450.887485  |              |             |             |             |
| ZNF652       | ZNF652       | 879.6998564 | 485.4526194 | 1502.676232 |
| 1120.934773  |              |             |             |             |
| CLP1         | CLP1         | 2360.313197 | 2706.550692 | 2252.675065 |
| 2148.536878  |              |             |             |             |
| ALKBH2       | ALKBH2       | 429.893272  | 708.8826953 | 823.2130043 |
| 822.081684   |              |             |             |             |
| GRM5         | GRM5         | 0           | 0           | 2.828262674 |
| 0            |              |             |             |             |
| HSD17B13     | HSD17B13     |             | 7.028227881 | 3.046773762 |

|             |         |             |             |             |             |
|-------------|---------|-------------|-------------|-------------|-------------|
| 31.24995136 |         | 3.771016899 |             |             |             |
| CD46        | CD46    | 5355.509645 | 5653.796511 | 9876.77034  |             |
| 9516.161144 |         |             |             |             |             |
| NACAD       | NACAD   | 0           | 3.046773762 | 0           | 8.484788022 |
| MROH9       | MROH9   | 9.370970508 | 0           | 0           | 0           |
| ALDH3B1     | ALDH3B1 | 1.171371313 | 2.031182508 | 2.678567259 |             |
| 6.599279573 |         |             |             |             |             |
| ATP1A1      | ATP1A1  | 4184.138332 | 2794.907131 | 3118.745145 |             |
| 2991.359155 |         |             |             |             |             |
| KCNE2       | KCNE2   | 4.685485254 | 3.046773762 | 2.678567259 |             |
| 9.427542247 |         |             |             |             |             |
| EHHADH      | EHHADH  | 370.1533351 | 268.1160911 | 100.8927001 |             |
| 288.4827928 |         |             |             |             |             |
| MICU1       | MICU1   | 2279.488576 | 2557.258778 | 1920.532725 |             |
| 2157.021666 |         |             |             |             |             |
| TRIM32      | TRIM32  | 1618.835155 | 1905.249193 | 1410.71209  |             |
| 1547.059683 |         |             |             |             |             |
| SOWAHD      | SOWAHD  | 39.82662466 | 53.82633646 | 95.53556557 |             |
| 24.51160984 |         |             |             |             |             |
| FBX045      | FBX045  | 2853.46052  | 3097.553325 | 1874.997081 |             |
| 1953.386754 |         |             |             |             |             |
| RIMBP3C     | RIMBP3C | 10.54234182 | 21.32741634 | 49.99992217 |             |
| 33.93915209 |         |             |             |             |             |
| SFTPA2      | SFTPA2  | 5.856856567 | 0           | 0           | 0           |
| PRR23A      | PRR23A  | 0           | 1.785711506 | 0           | 0           |
| ZNF846      | ZNF846  | 119.479874  | 90.38762161 | 424.1064827 |             |
| 240.4023273 |         |             |             |             |             |
| PCDH17      | PCDH17  | 0           | 4.464278765 | 0           |             |
| GRAPL       | GRAPL   | 8.199599194 | 2.031182508 | 1.785711506 |             |
| 1.885508449 |         |             |             |             |             |
| DPEP3       | DPEP3   | 10.54234182 | 6.093547524 | 0           | 41.48118589 |
| ST3GAL1     | ST3GAL1 | 6485.882963 | 5724.887899 | 5593.741293 |             |
| 6166.555384 |         |             |             |             |             |
| UNCX        | UNCX    | 0           | 1.015591254 | 0           | 0           |
| KATNAL1     | KATNAL1 | 990.9801312 | 754.5843018 | 283.9281295 |             |
| 434.6096976 |         |             |             |             |             |
| PEAR1       | PEAR1   | 0           | 0           | 0.892855753 | 3.771016899 |
| UQCC3       | UQCC3   | 791.8470079 | 1034.887488 | 610.7133351 |             |
| 663.6989742 |         |             |             |             |             |
| GNAT3       | GNAT3   | 0           | 0           | 0.892855753 | 0           |
| MAZ         | MAZ     | 4434.811793 | 3765.81237  | 3049.995252 |             |
| 3027.183816 |         |             |             |             |             |
| ICT1        | ICT1    | 1842.567076 | 2657.802312 | 1508.926223 |             |
| 1742.209807 |         |             |             |             |             |
| CYP2B6      | CYP2B6  | 1.171371313 | 10.15591254 | 11.60712479 | 0           |
| PNMT        | PNMT    | 0           | 0           | 4.713771124 |             |
| EXOSC10     | EXOSC10 | 8014.522527 | 9991.386757 | 6044.633448 |             |
| 7711.729558 |         |             |             |             |             |
| ZNF266      | ZNF266  | 1738.315029 | 1346.674003 | 2446.424763 |             |
| 2497.355941 |         |             |             |             |             |

|                 |              |             |             |             |   |
|-----------------|--------------|-------------|-------------|-------------|---|
| NPIPB3 NPIPB3   | 291.6714571  | 149.2919143 | 270.5352932 |             |   |
| 232.8602935     |              |             |             |             |   |
| MRPL13 MRPL13   | 6833.780243  | 7476.782812 | 3796.422662 |             |   |
| 5053.162644     |              |             |             |             |   |
| MRC2 MRC2       | 885.556713   | 626.6198037 | 303.570956  |             |   |
| 370.5024103     |              |             |             |             |   |
| NR2F6 NR2F6     | 600.9134838  | 695.680009  | 813.391591  |             |   |
| 933.3266825     |              |             |             |             |   |
| ALG12 ALG12     | 2414.196277  | 2202.81743  | 2533.031771 |             |   |
| 2310.690605     |              |             |             |             |   |
| RWDD2A RWDD2A   | 187.4194102  | 217.3365284 | 289.285264  |             |   |
| 463.8350786     |              |             |             |             |   |
| CTPS2 CTPS2     | 455.6634409  | 507.795627  | 308.0352348 |             |   |
| 384.6437237     |              |             |             |             |   |
| RPP40 RPP40     | 509.5465214  | 761.6934405 | 562.4991244 |             |   |
| 576.0228313     |              |             |             |             |   |
| PRKRIP1 PRKRIP1 | 1000.351102  | 1340.580455 | 1833.032861 |             |   |
| 1549.887945     |              |             |             |             |   |
| LRRK1 LRRK1     | 21.08468364  | 22.34300759 | 0.892855753 |             |   |
| 7.542033798     |              |             |             |             |   |
| FTSJ3 FTSJ3     | 7623.284508  | 8226.289158 | 5711.598252 |             |   |
| 7773.951337     |              |             |             |             |   |
| TRIT1 TRIT1     | 945.29665    | 1263.39552  | 1060.712635 |             |   |
| 1258.57689      |              |             |             |             |   |
| FRMD3 FRMD3     | 1.171371313  | 0           | 272.3210047 | 235.6885562 |   |
| HMHA1 HMHA1     | 37660.7591   | 39053.54608 | 27024.95793 |             |   |
| 26914.69036     |              |             |             |             |   |
| LINC00028       | LINC00028    | 0           | 0           | 2.678567259 | 0 |
| LOC100132356    | LOC100132356 | 101.9093043 | 86.32525659 |             |   |
| 382.1422623     | 219.6617344  |             |             |             |   |
| LRIT3 LRIT3     | 2.342742627  | 0           | 0           | 0           |   |
| ZFP69 ZFP69     | 217.8750643  | 181.7908345 | 364.2851472 |             |   |
| 420.4683842     |              |             |             |             |   |
| MED27 MED27     | 2971.769022  | 3938.462883 | 2471.424724 |             |   |
| 2382.339926     |              |             |             |             |   |
| DLD DLD         | 10554.05553  | 12876.68151 | 7068.738997 |             |   |
| 8160.480569     |              |             |             |             |   |
| NDUFAF3 NDUFAF3 | 5211.430974  | 6580.015735 | 4434.814525 |             |   |
| 4147.175835     |              |             |             |             |   |
| MKNK1 MKNK1     | 2120.182077  | 2909.668943 | 1978.568349 |             |   |
| 1967.528067     |              |             |             |             |   |
| PTHLH PTHLH     | 36.31251072  | 17.26505132 | 12.49998054 | 0           |   |
| MKNK2 MKNK2     | 4377.414598  | 2312.501285 | 1429.462061 |             |   |
| 1694.129342     |              |             |             |             |   |
| MYH10 MYH10     | 2008.901803  | 2106.336261 | 745.5345538 |             |   |
| 1133.190578     |              |             |             |             |   |
| LNPEP LNPEP     | 3337.236872  | 3001.072156 | 3950.886707 |             |   |
| 4346.096976     |              |             |             |             |   |
| ABRACL ABRACL   | 10149.93243  | 10212.78565 | 5286.598914 |             |   |
| 7516.579434     |              |             |             |             |   |

|              |              |             |             |             |
|--------------|--------------|-------------|-------------|-------------|
| RBM25        | RBM25        | 4870.561921 | 4802.73104  | 5549.098505 |
| 5845.076193  |              |             |             |             |
| OTOF         | OTOF         | 254.187575  | 217.3365284 | 88.39271955 |
| 150.840676   |              |             |             |             |
| AKNA         | AKNA         | 5430.477409 | 2562.336734 | 2187.496595 |
| 2725.502464  |              |             |             |             |
| SMOC1        | SMOC1        | 3.51411394  | 0           | 0           |
| C9orf163     | C9orf163     | 1.885508449 | 12.88508445 | 7.109138778 |
| 3.571423012  |              |             |             |             |
| MCOLN1       | MCOLN1       | 795.3611218 | 802.3170907 | 913.3914353 |
| 688.210584   |              |             |             |             |
| SRPR         | SRPR         | 14626.91359 | 16263.67834 | 15516.04728 |
| 14856.86383  |              |             |             |             |
| B3GNT4       | B3GNT4       | 0           | 1.015591254 | 9.821413283 |
| PET117       | PET117       | 973.4095615 | 1250.192834 | 28.28262674 |
| 1189.755832  |              |             |             | 1060.712635 |
| NEK1         | NEK1         | 1065.947895 | 1407.609478 | 1249.105198 |
| 1244.435577  |              |             |             |             |
| PTAFR        | PTAFR        | 31.62702546 | 29.45214637 | 107.1426904 |
| 92.38991402  |              |             |             |             |
| MPPED2       | MPPED2       | 8.199599194 | 0           | 4.464278765 |
| DCDC1        | DCDC1        | 0           | 0           | 10.37029647 |
| LOC101928295 | LOC101928295 | 22.32139383 | 13.3928363  | 3.771016899 |
| 22.32139383  |              | 11.3130507  | 1.171371313 | 2.031182508 |
| SLC9A3R2     | SLC9A3R2     | 24.10710533 | 12.88508445 | 22.34300759 |
| 24.10710533  |              | 21.68334717 |             |             |
| DLL1         | DLL1         | 4.685485254 | 14.21827756 | 268.7495817 |
| 75.42033798  |              |             |             |             |
| PPIL4        | PPIL4        | 1385.732264 | 1524.402472 | 2859.816977 |
| 2090.086116  |              |             |             |             |
| TEX37        | TEX37        | 0           | 1.015591254 | 0           |
| ARL4D        | ARL4D        | 131.1935871 | 411.3144579 | 208.9282462 |
| 132.9283457  |              |             |             |             |
| HNF1B        | HNF1B        | 146.4214142 | 241.7107185 | 5.357134518 |
| 52.79423658  |              |             |             |             |
| SMTNL2       | SMTNL2       | 1.171371313 | 2.031182508 | 0           |
| NNT          | NNT          | 10995.66252 | 9533.355102 | 0           |
| 6370.190296  |              |             |             | 4344.636094 |
| WDR60        | WDR60        | 291.6714571 | 350.3789826 | 462.4992801 |
| 320.5364364  |              |             |             |             |
| PSPH         | PSPH         | 918.3551098 | 1239.02133  | 733.927429  |
| 752.3178713  |              |             |             |             |
| FAM9A        | FAM9A        | 0           | 0           | 0.942754225 |
| CRYGS        | CRYGS        | 25.7701689  | 16.24946006 | 48.21421066 |
| 14.14131337  |              |             |             |             |
| XAF1         | XAF1         | 6936.860918 | 6990.314602 | 9813.377582 |
| 9874.40775   |              |             |             |             |
| BEX1         | BEX1         | 11.71371313 | 8.124730032 | 29.46423985 |
| 22.62610139  |              |             |             |             |
| DBNDD2       | DBNDD2       | 127.6794732 | 213.2741634 | 1006.248434 |

|                 |             |  |             |  |               |
|-----------------|-------------|--|-------------|--|---------------|
| 464.7778328     |             |  |             |  |               |
| C14orf182       | C14orf182   |  | 89.02421982 |  | 116.7929942   |
| 283.0352737     | 320.5364364 |  |             |  |               |
| NAA30 NAA30     | 2910.857714 |  | 3227.549005 |  | 2004.461166   |
| 2432.3059       |             |  |             |  |               |
| ITGA7 ITGA7     | 57.39719436 |  | 51.79515396 |  | 35.71423012   |
| 57.50800771     |             |  |             |  |               |
| C15orf65        | C15orf65    |  | 4.685485254 |  | 6.093547524   |
| 4.464278765     | 1.885508449 |  |             |  |               |
| DEXI DEXI       | 1265.081019 |  | 1391.360018 |  | 1716.961613   |
| 1390.562481     |             |  |             |  |               |
| PYGM PYGM       | 31.62702546 |  | 26.40537261 |  | 60.71419121   |
| 16.02682182     |             |  |             |  |               |
| WDR75 WDR75     | 4617.545718 |  | 4768.200938 |  | 5087.492081   |
| 5917.668269     |             |  |             |  |               |
| EID2B EID2B     | 203.8186085 |  | 151.3230969 |  | 220.535371    |
| 181.9515654     |             |  |             |  |               |
| SALL2 SALL2     | 14.05645576 |  | 14.21827756 |  | 120.5355267   |
| 101.8174563     |             |  |             |  |               |
| SERPINA2        | SERPINA2    |  | 0 0         |  | 8.035701777 0 |
| ZNF761 ZNF761   | 1238.139478 |  | 1456.357858 |  | 2259.817911   |
| 1771.435188     |             |  |             |  |               |
| SNORD21 SNORD21 | 2.342742627 |  | 10.15591254 |  | 8.035701777   |
| 3.771016899     |             |  |             |  |               |
| CEP290 CEP290   | 422.8650442 |  | 338.1918876 |  | 483.9278181   |
| 591.1068989     |             |  |             |  |               |
| C11orf48        | C11orf48    |  | 4916.245403 |  | 6146.35827    |
| 3867.851122     | 3785.158212 |  |             |  |               |
| ST7L ST7L       | 414.665445  |  | 426.5483267 |  | 585.713374    |
| 562.8242722     |             |  |             |  |               |
| DSCC1 DSCC1     | 1911.677984 |  | 1822.986301 |  | 576.7848165   |
| 984.2354106     |             |  |             |  |               |
| GSK3B GSK3B     | 1902.307013 |  | 1298.941214 |  | 1096.426865   |
| 1169.957993     |             |  |             |  |               |
| NPY2R NPY2R     | 0 0         |  | 0.892855753 |  | 0             |
| RPS5 RPS5       | 11172.53959 |  | 14037.50231 |  | 13407.12199   |
| 11018.91138     |             |  |             |  |               |
| TMEM67 TMEM67   | 224.9032922 |  | 238.6639447 |  | 296.42811     |
| 249.8298695     |             |  |             |  |               |
| DYM DYM         | 2190.464356 |  | 2300.31419  |  | 2115.175279   |
| 2600.116152     |             |  |             |  |               |
| CIPC CIPC       | 1003.865216 |  | 1254.255199 |  | 1449.104887   |
| 1123.763036     |             |  |             |  |               |
| MPV17L2 MPV17L2 | 1309.593128 |  | 2364.296439 |  | 1726.783026   |
| 1270.832695     |             |  |             |  |               |
| FUT10 FUT10     | 292.8428284 |  | 417.4080054 |  | 450.8921553   |
| 378.9871983     |             |  |             |  |               |
| ZNF687 ZNF687   | 171.0202118 |  | 150.3075056 |  | 144.642632    |
| 185.7225823     |             |  |             |  |               |
| FAM167B FAM167B | 3.51411394  |  | 3.046773762 |  | 0.892855753   |

|                 |                 |             |             |             |             |
|-----------------|-----------------|-------------|-------------|-------------|-------------|
| 2.828262674     |                 |             |             |             |             |
| ANKHD1-EIF4EBP3 | ANKHD1-EIF4EBP3 | 8417.474259 |             | 8033.32682  |             |
| 11360.6966      | 11563.82332     |             |             |             |             |
| METTL20         | METTL20         | 52.71170911 | 46.71719769 | 113.3926806 |             |
| 153.6689386     |                 |             |             |             |             |
| DLX3            | DLX3            | 0           | 3.046773762 | 2.678567259 | 2.828262674 |
| DDOST           | DDOST           | 18281.59209 | 24971.35775 | 18115.15037 |             |
| 16619.81423     |                 |             |             |             |             |
| PPME1           | PPME1           | 2958.883938 | 3795.264516 | 3739.279894 |             |
| 3880.376389     |                 |             |             |             |             |
| ZNF736          | ZNF736          | 470.891268  | 212.2585721 | 496.4277987 |             |
| 622.2177883     |                 |             |             |             |             |
| ZNF407          | ZNF407          | 1157.314858 | 721.0697904 | 1069.641192 |             |
| 957.8382923     |                 |             |             |             |             |
| IFITM10         | IFITM10         | 21.08468364 | 5.07795627  | 21.42853807 |             |
| 25.45436407     |                 |             |             |             |             |
| ZFAND1          | ZFAND1          | 982.780532  | 1105.978876 | 1610.711778 |             |
| 1454.669769     |                 |             |             |             |             |
| ERICH5          | ERICH5          | 1.171371313 | 11.17150379 | 18.74997081 |             |
| 35.82466054     |                 |             |             |             |             |
| IQCG            | IQCG            | 548.2017747 | 617.4794825 | 716.0703139 |             |
| 1522.548073     |                 |             |             |             |             |
| SDSL            | SDSL            | 8.199599194 | 16.24946006 | 24.10710533 |             |
| 10.37029647     |                 |             |             |             |             |
| TAS2R60         | TAS2R60         | 0           | 0           | 17.85711506 | 0           |
| SLC36A1         | SLC36A1         | 532.9739476 | 303.661785  | 159.8211798 |             |
| 442.1517314     |                 |             |             |             |             |
| ARID4A          | ARID4A          | 1644.605324 | 1642.211058 | 3342.851939 |             |
| 2934.793902     |                 |             |             |             |             |
| CALR3           | CALR3           | 9.370970508 | 15.23386881 | 4.464278765 |             |
| 10.37029647     |                 |             |             |             |             |
| NEIL2           | NEIL2           | 679.3953618 | 907.9385811 | 1194.640998 |             |
| 1145.446383     |                 |             |             |             |             |
| MOGAT1          | MOGAT1          | 0           | 1.015591254 | 0           | 0           |
| OLFM2           | OLFM2           | 175.705697  | 192.9623383 | 197.3211214 |             |
| 98.04643937     |                 |             |             |             |             |
| SNRPN           | SNRPN           | 4443.011392 | 5499.426641 | 12707.12308 |             |
| 8476.303234     |                 |             |             |             |             |
| NMNAT1          | NMNAT1          | 735.6211849 | 786.0676306 | 678.5703723 |             |
| 622.2177883     |                 |             |             |             |             |
| ARV1            | ARV1            | 1344.734268 | 1229.881009 | 1242.855208 |             |
| 1570.628538     |                 |             |             |             |             |
| VPS29           | VPS29           | 6970.830686 | 7709.353209 | 4827.671057 |             |
| 5497.199884     |                 |             |             |             |             |
| PARD3B          | PARD3B          | 3.51411394  | 34.53010264 | 0.892855753 |             |
| 5.656525348     |                 |             |             |             |             |
| DLG3            | DLG3            | 1855.452161 | 1114.103606 | 1049.998366 |             |
| 1427.329896     |                 |             |             |             |             |
| FBX041          | FBX041          | 668.85302   | 212.2585721 | 217.8568037 |             |
| 336.5632582     |                 |             |             |             |             |

|                 |              |               |               |
|-----------------|--------------|---------------|---------------|
| KIAA0368        | KIAA0368     | 5689.350469   | 5132.798198   |
| 4150.886396     | 4917.406036  |               |               |
| TOPAZ1 TOPAZ1   | 0 0          | 1.785711506   | 0             |
| CBX1 CBX1       | 1837.881591  | 1565.026122   | 1333.033639   |
| 1384.905956     |              |               |               |
| SLC35F2 SLC35F2 | 3508.257084  | 4506.178394   | 1969.639791   |
| 2510.5545       |              |               |               |
| SLC37A1 SLC37A1 | 309.2420268  | 154.3698706   | 1436.604907   |
| 1053.056469     |              |               |               |
| FAM170A FAM170A | 0 0          | 0 5.656525348 |               |
| AGAP5 AGAP5     | 90.19559114  | 39.60805891   | 112.4998249   |
| 86.73338867     |              |               |               |
| LIPN LIPN       | 1.171371313  | 22.34300759   | 5.357134518   |
| 8.484788022     |              |               |               |
| RAD21 RAD21     | 21484.12126  | 16963.42072   | 9786.591909   |
| 12219.03751     |              |               |               |
| ZBED4 ZBED4     | 2921.400056  | 1744.785774   | 1757.140122   |
| 1527.261844     |              |               |               |
| LMNA LMNA       | 3118.190436  | 7543.811835   | 8834.807676   |
| 4765.622606     |              |               |               |
| ZNF155 ZNF155   | 347.8972801  | 213.2741634   | 467.8564146   |
| 563.7670264     |              |               |               |
| NPHP3-ACAD11    | NPHP3-ACAD11 | 1121.002347   | 666.2278627   |
| 1518.747636     | 1479.181379  |               |               |
| LOC653160       | LOC653160    | 55.05445173   | 31.48332888   |
| 75.89273901     | 61.27902461  |               |               |
| MEF2C-AS1       | MEF2C-AS1    | 0 0           | 0 0.942754225 |
| STX16 STX16     | 4837.763525  | 3617.536047   | 4188.386337   |
| 5220.030142     |              |               |               |
| CREB3L3 CREB3L3 | 132.3649584  | 249.8354485   | 68.74989298   |
| 21.68334717     |              |               |               |
| SKA1 SKA1       | 3867.868077  | 3688.627435   | 1220.533814   |
| 1768.606926     |              |               |               |
| FUK FUK         | 1027.292642  | 877.4708435   | 788.3916299   |
| 709.8939312     |              |               |               |
| RASA2 RASA2     | 2505.563239  | 2352.109344   | 3209.816432   |
| 3681.455248     |              |               |               |
| SPINK13 SPINK13 | 0 0          | 0 8.484788022 |               |
| PMEL PMEL       | 53.88308042  | 18.28064257   | 36.60708587   |
| 76.3630922      |              |               |               |
| PVR PVR         | 518.9174919  | 520.9983133   | 295.5352543   |
| 340.3342751     |              |               |               |
| HEPACAM2        | HEPACAM2     | 0 1.015591254 | 51.78563368   |
| 1.885508449     |              |               |               |
| C1orf101        | C1orf101     | 22.25605496   | 7.109138778   |
| 51.78563368     | 44.30944856  |               |               |
| FRG2B FRG2B     | 0 0          | 0 6.599279573 |               |
| UNKL UNKL       | 1083.518465  | 820.5977333   | 1190.176719   |
| 1123.763036     |              |               |               |
| GTF3C2 GTF3C2   | 7424.151385  | 9341.408355   | 6873.203587   |

|             |             |             |             |             |
|-------------|-------------|-------------|-------------|-------------|
| 6853.823214 |             |             |             |             |
| CYBRD1      | CYBRD1      | 148.7641568 | 47.73278894 | 99.10698859 |
| 107.4739816 |             |             |             |             |
| PRMT7       | PRMT7       | 2796.063325 | 3821.669889 | 2848.209852 |
| 2810.350344 |             |             |             |             |
| PAPSS1      | PAPSS1      | 3634.765186 | 5500.442232 | 3216.959278 |
| 3505.160207 |             |             |             |             |
| MMACHC      | MMACHC      | 809.4175776 | 814.5041857 | 510.7134907 |
| 552.4539757 |             |             |             |             |
| MON2        | MON2        | 3263.440479 | 2398.826542 | 2809.817055 |
| 2952.706232 |             |             |             |             |
| PIK3R1      | PIK3R1      | 3455.545375 | 3099.584507 | 4733.921203 |
| 5849.789964 |             |             |             |             |
| RBMX        | RBMX        | 15890.82324 | 16808.03525 | 15442.8331  |
| 18333.74141 |             |             |             |             |
| FKBP9       | FKBP9       | 32.79839678 | 12.18709505 | 42.85707615 |
| 35.82466054 |             |             |             |             |
| LINC00526   | LINC00526   |             | 149.9355281 | 121.8709505 |
| 240.1781976 | 263.9711829 |             |             |             |
| RAB33B      | RAB33B      | 530.631205  | 299.5994199 | 1002.677011 |
| 915.4143522 |             |             |             |             |
| BCL11B      | BCL11B      | 1088.20395  | 454.9848818 | 674.9989493 |
| 1066.255028 |             |             |             |             |
| ATP13A1     | ATP13A1     | 9240.948292 | 10434.18454 | 7599.98817  |
| 7834.287607 |             |             |             |             |
| BCL2L10     | BCL2L10     | 0           | 3.046773762 | 0           |
| 4.713771124 |             |             |             |             |
| ZBTB34      | ZBTB34      | 272.929516  | 123.902133  | 211.6068135 |
| 277.1697421 |             |             |             |             |
| N4BP2L1     | N4BP2L1     | 859.7865441 | 899.8138511 | 2419.639091 |
| 1581.941589 |             |             |             |             |
| SLC22A23    | SLC22A23    |             | 49.19759517 | 27.42096386 |
| 245.5353321 | 181.0088111 |             |             |             |
| PSMG3       | PSMG3       | 1529.810935 | 1872.750272 | 1190.176719 |
| 1268.947186 |             |             |             |             |
| ALS2        | ALS2        | 1092.889435 | 693.6488265 | 906.2485893 |
| 1122.820282 |             |             |             |             |
| CCNJ        | CCNJ        | 415.8368163 | 355.4569389 | 422.3207712 |
| 291.3110554 |             |             |             |             |
| FAM204A     | FAM204A     | 1962.04695  | 2258.674949 | 2773.209969 |
| 2316.34713  |             |             |             |             |
| SCRN2       | SCRN2       | 1173.714056 | 1104.963284 | 1002.677011 |
| 1458.440786 |             |             |             |             |
| MND1        | MND1        | 671.1957626 | 656.0719501 | 320.5352153 |
| 430.8386807 |             |             |             |             |
| ATP8B1      | ATP8B1      | 48.02622385 | 42.65483267 | 82.14272928 |
| 74.47758375 |             |             |             |             |
| ZDHHC9      | ZDHHC9      | 343.2117948 | 515.9203571 | 603.570489  |
| 713.6649481 |             |             |             |             |
| C9orf43     | C9orf43     | 23.42742627 | 44.68601518 | 189.2854196 |
| 34.88190631 |             |             |             |             |



|             |         |             |             |             |
|-------------|---------|-------------|-------------|-------------|
| GCSAM       | GCSAM   | 333.8408243 | 371.706399  | 1275.890871 |
| 723.0924904 |         |             |             |             |
| HFM1        | HFM1    | 0           | 0           | 1.785711506 |
| TRIM41      | TRIM41  | 196.7903807 | 99.5279429  | 71.42846024 |
| 65.05004151 |         |             |             |             |
| ZNF564      | ZNF564  | 917.1837384 | 863.2525659 | 2327.674948 |
| 1894.935992 |         |             |             |             |
| DENND5B     | DENND5B | 21.08468364 | 32.49892013 | 28.5713841  |
| 11.3130507  |         |             |             |             |
| ZNF470      | ZNF470  | 188.5907815 | 224.4456671 | 693.7489201 |
| 369.5596561 |         |             |             |             |
| CD79B       | CD79B   | 1896.450156 | 2961.464097 | 822.3201485 |
| 1294.401551 |         |             |             |             |
| SMIM1       | SMIM1   | 10.54234182 | 2.031182508 | 8.035701777 |
| 22.62610139 |         |             |             |             |
| CCDC85B     | CCDC85B | 2558.274949 | 3649.019376 | 2340.174929 |
| 2228.670987 |         |             |             |             |
| DTX4        | DTX4    | 0           | 0           | 20.53568232 |
| NR2C2       | NR2C2   | 2158.837331 | 1165.89876  | 1829.461438 |
| 1879.851924 |         |             |             |             |
| UROD        | UROD    | 3829.212824 | 5387.711603 | 4999.992217 |
| 3889.803931 |         |             |             |             |
| EPB41       | EPB41   | 6899.377036 | 2565.383508 | 6334.811568 |
| 5602.788357 |         |             |             |             |
| LBX2        | LBX2    | 22.25605496 | 22.34300759 | 3.571423012 |
| 2.828262674 |         |             |             |             |
| STIM1       | STIM1   | 4503.9227   | 2267.81527  | 2123.210981 |
| 1996.753448 |         |             |             |             |
| ROR2        | ROR2    | 168.6774691 | 21.32741634 | 0           |
| NRTN        | NRTN    | 2.342742627 | 13.2026863  | 52.79423658 |
| 14.14131337 |         |             |             | 33.92851862 |
| GANAB       | GANAB   | 20172.18539 | 18178.06786 | 14082.12094 |
| 13768.92545 |         |             |             |             |
| NBPF20      | NBPF20  | 86.6814772  | 66.01343151 | 243.7496206 |
| 115.0160154 |         |             |             |             |
| ZNF890P     | ZNF890P | 18.74194102 | 7.109138778 | 21.42853807 |
| 64.10728728 |         |             |             |             |
| APOL1       | APOL1   | 3672.249068 | 4334.543472 | 6810.703684 |
| 5242.656244 |         |             |             |             |
| ZAR1L       | ZAR1L   | 3.51411394  | 0           | 0           |
| RAD21L1     | RAD21L1 | 1.171371313 | 0           | 9.821413283 |
| ACOXL       | ACOXL   | 26.94154021 | 26.40537261 | 43.7499319  |
| 18.85508449 |         |             |             |             |
| SARS2       | SARS2   | 2144.780875 | 2301.329782 | 1228.569516 |
| 1288.745025 |         |             |             |             |
| KAT6B       | KAT6B   | 1580.179902 | 1339.564864 | 2850.888419 |
| 2404.023273 |         |             |             |             |
| CRKL        | CRKL    | 9054.700253 | 8562.449863 | 10633.01916 |
| 8590.376496 |         |             |             |             |
| CRK         | CRK     | 1890.5933   | 1840.251352 | 2960.709677 |

|             |           |             |             |             |             |
|-------------|-----------|-------------|-------------|-------------|-------------|
| 2481.329119 |           |             |             |             |             |
| HSPA1A      | HSPA1A    | 264.7299168 | 1.015591254 | 0.892855753 |             |
| 260.200166  |           |             |             |             |             |
| SYNJ1       | SYNJ1     | 1284.994331 | 770.8337618 | 948.2128097 |             |
| 1196.355111 |           |             |             |             |             |
| CXADR       | CXADR     | 39.82662466 | 120.8553592 | 60.71419121 |             |
| 90.50440557 |           |             |             |             |             |
| TMEM191C    | TMEM191C  |             | 18.74194102 | 5.07795627  |             |
| 27.67852834 |           | 16.96957604 |             |             |             |
| CLASP1      | CLASP1    | 5039.239391 | 2833.499599 | 2824.995603 |             |
| 3050.752671 |           |             |             |             |             |
| CRABP2      | CRABP2    | 1.171371313 | 8.124730032 | 34.82137437 |             |
| 3.771016899 |           |             |             |             |             |
| FGFBP2      | FGFBP2    | 172.1915831 | 37.5768764  | 20.53568232 |             |
| 124.4435577 |           |             |             |             |             |
| HINT3       | HINT3     | 1010.893444 | 1091.760598 | 1539.283318 |             |
| 1293.458796 |           |             |             |             |             |
| VWA3A       | VWA3A     | 4.685485254 | 0           | 0           | 8.484788022 |
| DIP2B       | DIP2B     | 4290.733121 | 1689.943847 | 1705.354488 |             |
| 2773.582929 |           |             |             |             |             |
| ABHD8       | ABHD8     | 1037.834984 | 678.4149577 | 605.3562006 |             |
| 671.241008  |           |             |             |             |             |
| ATP13A3     | ATP13A3   | 7904.413623 | 4264.467676 | 2344.639207 |             |
| 3634.317536 |           |             |             |             |             |
| WFDC12      | WFDC12    | 0           | 4.062365016 | 6.249990271 | 0.942754225 |
| SPSB4       | SPSB4     | 0           | 2.031182508 | 3.571423012 | 0           |
| CCNO        | CCNO      | 3.51411394  | 6.093547524 | 12.49998054 |             |
| 3.771016899 |           |             |             |             |             |
| MST1        | MST1      | 37.48388203 | 28.43655511 | 94.64270982 |             |
| 77.30584643 |           |             |             |             |             |
| UBR5        | UBR5      | 4835.420782 | 1508.153012 | 2594.638818 |             |
| 2522.810305 |           |             |             |             |             |
| SNORA26     | SNORA26   | 12.88508445 | 7.109138778 | 41.96422039 |             |
| 37.71016899 |           |             |             |             |             |
| KCNH2       | KCNH2     | 30.45565415 | 22.34300759 | 47.32135491 |             |
| 9.427542247 |           |             |             |             |             |
| HYAL2       | HYAL2     | 849.2442023 | 1191.288541 | 630.3561616 |             |
| 723.0924904 |           |             |             |             |             |
| LIN54       | LIN54     | 2215.063154 | 1647.289014 | 1981.246916 |             |
| 2130.624548 |           |             |             |             |             |
| PRSS37      | PRSS37    | 0           | 0           | 1.785711506 | 7.542033798 |
| ESRRA       | ESRRA     | 3311.466703 | 3450.979081 | 3680.351414 |             |
| 3485.362369 |           |             |             |             |             |
| PARP6       | PARP6     | 1400.960091 | 1174.02349  | 3930.351025 |             |
| 2951.763478 |           |             |             |             |             |
| CSNK2A1     | CSNK2A1   | 6745.927394 | 6589.156056 | 4858.921008 |             |
| 5659.353611 |           |             |             |             |             |
| MIPEPP3     | MIPEPP3   | 344.3831662 | 292.4902812 | 200.8925444 |             |
| 332.7922413 |           |             |             |             |             |
| HTATSF1P2   | HTATSF1P2 |             | 245.9879758 | 513.8891745 |             |

|                 |             |             |             |   |
|-----------------|-------------|-------------|-------------|---|
| 335.7137631     | 214.9479632 |             |             |   |
| BBS4 BBS4       | 1088.20395  | 1501.043873 | 1632.140317 |   |
| 1313.256635     |             |             |             |   |
| RHPN1-AS1       | RHPN1-AS1   | 11.71371313 | 21.32741634 |   |
| 91.07128681     | 32.05364364 |             |             |   |
| HEBP2 HEBP2     | 2730.466532 | 3684.56507  | 2036.603973 |   |
| 1681.873537     |             |             |             |   |
| SLC18A2 SLC18A2 | 66.76816487 | 47.73278894 | 28.5713841  |   |
| 107.4739816     |             |             |             |   |
| RCN1 RCN1       | 1362.304838 | 1611.74332  | 1378.569283 |   |
| 1663.018452     |             |             |             |   |
| SDHB SDHB       | 8264.024616 | 10782.53234 | 7395.524202 |   |
| 7014.091432     |             |             |             |   |
| PIAS3 PIAS3     | 1884.736443 | 2016.964231 | 2865.174111 |   |
| 2689.677803     |             |             |             |   |
| RASA1 RASA1     | 2782.006869 | 1935.71693  | 1367.855014 |   |
| 1978.841118     |             |             |             |   |
| ZNF491 ZNF491   | 10.54234182 | 19.29623383 | 0.892855753 |   |
| 34.88190631     |             |             |             |   |
| HERC4 HERC4     | 2450.508788 | 2418.122776 | 2548.210319 |   |
| 2747.185811     |             |             |             |   |
| NCF4 NCF4       | 4015.460863 | 5981.832486 | 1267.855169 |   |
| 2127.796285     |             |             |             |   |
| ISY1 ISY1       | 4530.86424  | 5575.595985 | 4845.528172 |   |
| 4526.163033     |             |             |             |   |
| PIPOX PIPOX     | 11.71371313 | 12.18709505 | 39.28565313 |   |
| 37.71016899     |             |             |             |   |
| TTC9 TTC9       | 327.9839678 | 1041.996627 | 1541.961885 |   |
| 611.8474918     |             |             |             |   |
| NANS NANS       | 3250.555395 | 5550.206203 | 2322.317814 |   |
| 2312.576113     |             |             |             |   |
| CDAN1 CDAN1     | 1677.403721 | 1522.37129  | 1543.747597 |   |
| 1443.356718     |             |             |             |   |
| GIMAP8 GIMAP8   | 3619.537359 | 2525.775449 | 4265.171932 |   |
| 3810.612576     |             |             |             |   |
| SIGLEC12        | SIGLEC12    | 0           | 4.062365016 | 0 |
| ZCWPW1 ZCWPW1   | 114.7943887 | 125.9333155 | 494.6420872 | 0 |
| 404.4415624     |             |             |             |   |
| PRUNE PRUNE     | 2185.778871 | 2610.069523 | 4462.493054 |   |
| 3599.43563      |             |             |             |   |
| C10TNF6 C10TNF6 | 62.08267961 | 40.62365016 | 48.21421066 |   |
| 74.47758375     |             |             |             |   |
| C19orf12        | C19orf12    | 3281.011049 | 3108.724829 |   |
| 2254.460776     | 2293.721029 |             |             |   |
| C18orf21        | C18orf21    | 718.0506152 | 611.3859349 |   |
| 699.9989104     | 778.7149896 |             |             |   |
| DDX55 DDX55     | 1835.538848 | 2217.035708 | 2477.674715 |   |
| 2154.193403     |             |             |             |   |
| ZNFX1 ZNFX1     | 12876.88485 | 12486.69447 | 20019.61169 |   |
| 15368.77937     |             |             |             |   |

|             |             |             |             |             |
|-------------|-------------|-------------|-------------|-------------|
| CCDC69      | CCDC69      | 9447.109643 | 7974.422527 | 7616.952429 |
| 7357.25397  |             |             |             |             |
| PRPF31      | PRPF31      | 7444.064697 | 11147.1296  | 6799.096559 |
| 6553.084616 |             |             |             |             |
| LDLRAP1     | LDLRAP1     | 2142.438132 | 2826.39046  | 5762.49103  |
| 4597.812354 |             |             |             |             |
| LRMP        | LRMP        | 2168.208301 | 844.9719234 | 2376.782015 |
| 3029.069324 |             |             |             |             |
| PRDM10      | PRDM10      | 816.4458055 | 609.3547524 | 858.9272344 |
| 825.8527009 |             |             |             |             |
| TMEM206     | TMEM206     | 986.2946459 | 1210.584775 | 1210.712401 |
| 804.1693537 |             |             |             |             |
| SPATA17     | SPATA17     | 3.51411394  | 6.093547524 | 6.249990271 |
| 2.828262674 |             |             |             |             |
| ZNF701      | ZNF701      | 916.0123671 | 763.724623  | 1621.426048 |
| 1831.771459 |             |             |             |             |
| WDR12       | WDR12       | 2804.262924 | 3962.837073 | 2342.853496 |
| 2779.239454 |             |             |             |             |
| GINM1       | GINM1       | 1315.449985 | 1174.02349  | 1418.747792 |
| 1474.467607 |             |             |             |             |
| NHLRC2      | NHLRC2      | 1253.367305 | 997.3106115 | 677.6775165 |
| 898.4447762 |             |             |             |             |
| ACSF3       | ACSF3       | 2698.839506 | 2524.759858 | 2214.282268 |
| 2590.68861  |             |             |             |             |
| SETBP1      | SETBP1      | 76.13913537 | 28.43655511 | 3.571423012 |
| 41.48118589 |             |             |             |             |
| KLC1        | KLC1        | 5833.429141 | 6290.572228 | 5241.06327  |
| 5851.675473 |             |             |             |             |
| ATP5S       | ATP5S       | 372.4960777 | 210.2273896 | 196.4282657 |
| 247.9443611 |             |             |             |             |
| GBA         | GBA         | 3837.412423 | 4785.465989 | 2796.424218 |
| 3389.201438 |             |             |             |             |
| H00K3       | H00K3       | 2356.799083 | 1919.46747  | 1707.1402   |
| 1674.331503 |             |             |             |             |
| CHMP4B      | CHMP4B      | 402.9517318 | 216.3209371 | 300.8923888 |
| 190.4363534 |             |             |             |             |
| MOCS2       | MOCS2       | 2056.928026 | 1940.794886 | 2324.996381 |
| 1858.168577 |             |             |             |             |
| LOXL3       | LOXL3       | 1296.708044 | 1615.805685 | 1017.855558 |
| 1119.049265 |             |             |             |             |
| MBNL1-AS1   | MBNL1-AS1   |             | 781.3046661 | 683.492914  |
| 888.3914743 | 1018.174563 |             |             |             |
| TMX2        | TMX2        | 6004.449353 | 8132.854762 | 8438.379722 |
| 7211.127065 |             |             |             |             |
| BCL7A       | BCL7A       | 374.8388203 | 144.2139581 | 207.1425347 |
| 242.2878358 |             |             |             |             |
| SIRT1       | SIRT1       | 1940.962266 | 1908.295966 | 2872.316958 |
| 2640.654583 |             |             |             |             |
| TTK         | TTK         | 3879.58179  | 3785.108604 | 1142.855364 |
| 2419.107341 |             |             |             |             |

|             |             |             |             |             |
|-------------|-------------|-------------|-------------|-------------|
| KCNJ13      | KCNJ13      | 43.3407386  | 18.28064257 | 28.5713841  |
| 16.96957604 |             |             |             |             |
| PXMP4       | PXMP4       | 1149.115259 | 1398.469157 | 644.6418537 |
| 915.4143522 |             |             |             |             |
| RRH         | RRH         | 1.171371313 | 0           | 0.892855753 |
| FUT9        | FUT9        | 0           | 0           | 0           |
| WFDC2       | WFDC2       | 17.5705697  | 0           | 14.28569205 |
| LASP1       | LASP1       | 13705.04437 | 8892.51702  | 5426.777267 |
| 7642.9085   |             |             |             |             |
| CRHR1-IT1   | CRHR1-IT1   |             | 22.25605496 | 27.42096386 |
| 55.35705669 | 35.82466054 |             |             |             |
| SMC5-AS1    | SMC5-AS1    |             | 19.91331233 | 13.2026863  |
| 30.3570956  | 10.37029647 |             |             |             |
| TNFRSF8     | TNFRSF8     | 1046.034583 | 1407.609478 | 893.7486088 |
| 1680.930783 |             |             |             |             |
| MIR210      | MIR210      | 1.171371313 | 0           | 0           |
| C1QTNF8     | C1QTNF8     | 8.199599194 | 6.093547524 | 4.464278765 |
| 5.656525348 |             |             |             |             |
| JMJD1C      | JMJD1C      | 2731.637903 | 1952.981982 | 4083.922214 |
| 4443.200661 |             |             |             |             |
| RPL23AP82   | RPL23AP82   |             | 316.2702546 | 453.9692906 |
| 566.9634032 | 522.2858405 |             |             |             |
| FBX05       | FBX05       | 4098.628226 | 3827.763437 | 1853.568543 |
| 2068.402769 |             |             |             |             |
| THAP5       | THAP5       | 1277.966103 | 357.4881214 | 742.8559865 |
| 1499.921972 |             |             |             |             |
| C16orf95    | C16orf95    |             | 329.1553391 | 310.7709237 |
| 150.8926223 | 207.4059294 |             |             |             |
| REV3L       | REV3L       | 2109.639736 | 1606.665364 | 1754.461555 |
| 2306.919588 |             |             |             |             |
| MANBAL      | MANBAL      | 870.3288859 | 980.0455602 | 864.2843689 |
| 880.5324459 |             |             |             |             |
| NDP         | NDP         | 1.171371313 | 0           | 0           |
| MYOC        | MYOC        | 0           | 1.785711506 | 0           |
| GLYAT       | GLYAT       | 0           | 0           | 1.885508449 |
| CUBN        | CUBN        | 5.856856567 | 12.18709505 | 62.49990271 |
| 28.28262674 |             |             |             |             |
| RPS11       | RPS11       | 11459.52556 | 11287.2812  | 12476.76629 |
| 12539.57394 |             |             |             |             |
| ANKH        | ANKH        | 3723.789405 | 3460.119403 | 3166.959356 |
| 3844.551728 |             |             |             |             |
| FOXD4L1     | FOXD4L1     | 3.51411394  | 2.031182508 | 0           |
| FOXB1       | FOXB1       | 49.19759517 | 12.18709505 | 0           |
| RNF115      | RNF115      | 2259.575264 | 2223.129255 | 2301.782131 |
| 1952.443999 |             |             |             |             |
| CDC42BPA    | CDC42BPA    |             | 51.54033779 | 64.99784026 |
| 8.035701777 | 51.85148236 |             |             |             |
| SOCS2-AS1   | SOCS2-AS1   |             | 9.370970508 | 59.91988399 |
| 45.5356434  | 18.85508449 |             |             |             |
| MIR210HG    | MIR210HG    |             | 24.59879758 | 18.28064257 |

|                 |               |             |               |  |
|-----------------|---------------|-------------|---------------|--|
| 31.24995136     | 67.87830418   |             |               |  |
| NSFL1C NSFL1C   | 3577.367991   | 5199.827221 | 5555.348495   |  |
| 4391.349179     |               |             |               |  |
| MRPL42 MRPL42   | 6019.67718    | 6089.485159 | 3742.851317   |  |
| 4519.563753     |               |             |               |  |
| ZNF343 ZNF343   | 611.4558256   | 678.4149577 | 1018.748414   |  |
| 893.731005      |               |             |               |  |
| AKR1C3 AKR1C3   | 545.8590321   | 592.0897011 | 189.2854196   |  |
| 167.810252      |               |             |               |  |
| TMEM89 TMEM89   | 0 1.015591254 | 5.357134518 | 1.885508449   |  |
| ANKZF1 ANKZF1   | 3025.652103   | 3049.820536 | 4558.028619   |  |
| 4775.992902     |               |             |               |  |
| TMEM120B        | TMEM120B      | 8249.968161 | 8662.993397   |  |
| 5585.705591     | 7873.883285   |             |               |  |
| LAMA2 LAMA2     | 44.51210991   | 44.68601518 | 60.71419121   |  |
| 36.76741476     |               |             |               |  |
| SPATA2 SPATA2   | 1577.837159   | 1585.337948 | 1682.140239   |  |
| 1447.127735     |               |             |               |  |
| GATB GATB       | 1791.026738   | 2423.200732 | 1344.640764   |  |
| 1674.331503     |               |             |               |  |
| SLC38A10        | SLC38A10      | 7712.308728 | 9069.229899   |  |
| 6224.097454     | 6969.781983   |             |               |  |
| GPR89A GPR89A   | 429.893272    | 581.9337886 | 680.3560838   |  |
| 504.3735102     |               |             |               |  |
| NFKBIE NFKBIE   | 2887.430288   | 4640.23644  | 2844.638429   |  |
| 2528.466831     |               |             |               |  |
| TP53BP1 TP53BP1 | 4206.394387   | 3247.86083  | 2628.567337   |  |
| 3113.917204     |               |             |               |  |
| NOC2L NOC2L     | 8710.317087   | 13856.72707 | 8758.022081   |  |
| 8138.797222     |               |             |               |  |
| MLLT6 MLLT6     | 1534.496421   | 628.6509863 | 1061.60549    |  |
| 1057.77024      |               |             |               |  |
| DHRS11 DHRS11   | 446.2924704   | 607.3235699 | 334.8209074   |  |
| 349.7618174     |               |             |               |  |
| TNFRSF6B        | TNFRSF6B      | 44.51210991 | 13.2026863    |  |
| 16.07140355     | 36.76741476   |             |               |  |
| NR5A2 NR5A2     | 135.8790724   | 45.70160643 | 0 58.45076193 |  |
| RIPK2 RIPK2     | 345.5545375   | 510.8424008 | 1975.889781   |  |
| 1573.456801     |               |             |               |  |
| CDS2 CDS2       | 5056.80996    | 5711.685213 | 4801.77824    |  |
| 4438.48689      |               |             |               |  |
| TMEM238 TMEM238 | 73.79639275   | 74.13816155 | 42.85707615   |  |
| 65.05004151     |               |             |               |  |
| PCID2 PCID2     | 5955.251758   | 5380.602464 | 3769.636989   |  |
| 4511.078965     |               |             |               |  |
| BNIP3L BNIP3L   | 2690.639907   | 2293.205052 | 5043.742149   |  |
| 4594.041337     |               |             |               |  |
| PIK3C3 PIK3C3   | 2342.742627   | 2256.643767 | 2978.566792   |  |
| 2708.532888     |               |             |               |  |
| RAB31 RAB31     | 110.1089035   | 256.9445873 | 60.71419121   |  |

|              |              |             |             |             |             |
|--------------|--------------|-------------|-------------|-------------|-------------|
| 40.53843166  |              |             |             |             |             |
| FAN1         | FAN1         | 1366.990323 | 1100.900919 | 2183.032316 |             |
| 1724.297477  |              |             |             |             |             |
| SRP19        | SRP19        | 4562.491266 | 4990.615422 | 3387.494727 |             |
| 3769.13139   |              |             |             |             |             |
| CHRDL1       | CHRDL1       | 0           | 0           | 1.785711506 | 0.942754225 |
| MIR6865      | MIR6865      | 5.856856567 | 0           | 0.892855753 | 4.713771124 |
| PAOX         | PAOX         | 242.4738619 | 275.2252298 | 336.6066189 |             |
| 381.815461   |              |             |             |             |             |
| PLEKHA3      | PLEKHA3      | 1405.645576 | 1204.491227 | 1983.925483 |             |
| 1426.387142  |              |             |             |             |             |
| NDUFC2       | NDUFC2       | 6975.516172 | 8459.875146 | 4427.671679 |             |
| 4864.6118    |              |             |             |             |             |
| HEY2         | HEY2         | 1.171371313 | 1.015591254 | 34.82137437 |             |
| 33.93915209  |              |             |             |             |             |
| HEY1         | HEY1         | 3.51411394  | 80.23170907 | 22.32139383 | 0           |
| ANKRD39      | ANKRD39      | 2037.014714 | 3693.705391 | 1016.962703 |             |
| 1119.049265  |              |             |             |             |             |
| OVOL3        | OVOL3        | 5.856856567 | 11.17150379 | 17.85711506 |             |
| 8.484788022  |              |             |             |             |             |
| DRICH1       | DRICH1       | 8.199599194 | 3.046773762 | 15.1785478  |             |
| 13.19855915  |              |             |             |             |             |
| EVA1C        | EVA1C        | 64.42542224 | 55.85751897 | 317.8566481 |             |
| 269.6277083  |              |             |             |             |             |
| RDH13        | RDH13        | 838.7018604 | 1458.389041 | 1002.677011 |             |
| 1068.140537  |              |             |             |             |             |
| TMEM38B      | TMEM38B      | 776.6191808 | 1026.762758 | 2292.853574 |             |
| 1284.974008  |              |             |             |             |             |
| SHKBP1       | SHKBP1       | 12431.76375 | 13930.86523 | 7058.024728 |             |
| 8404.653913  |              |             |             |             |             |
| DCBLD2       | DCBLD2       | 213.1895791 | 252.8822223 | 80.35701777 |             |
| 147.0696591  |              |             |             |             |             |
| MRPL52       | MRPL52       | 3456.716746 | 4107.051031 | 2325.889237 |             |
| 2411.565307  |              |             |             |             |             |
| GPR62        | GPR62        | 10.54234182 | 2.031182508 | 27.67852834 |             |
| 7.542033798  |              |             |             |             |             |
| RLN3         | RLN3         | 3.51411394  | 2.031182508 | 33.03566286 |             |
| 3.771016899  |              |             |             |             |             |
| ASB16        | ASB16        | 393.5807613 | 310.7709237 | 360.7137242 |             |
| 466.6633412  |              |             |             |             |             |
| FAF1         | FAF1         | 3776.501115 | 4777.341259 | 3448.208918 |             |
| 3849.2655    |              |             |             |             |             |
| SNORD116-28  | SNORD116-28  |             | 0           | 0           | 1.785711506 |
| SNORD116-29  | SNORD116-29  |             | 0           | 0           | 0.892855753 |
| 4.713771124  |              |             |             |             |             |
| ADAP1        | ADAP1        | 899.6131687 | 1173.007898 | 1179.46245  |             |
| 991.7774444  |              |             |             |             |             |
| LOC100240735 | LOC100240735 |             | 28.11291152 | 26.40537261 |             |
| 58.03562395  | 65.05004151  |             |             |             |             |
| AP4B1-AS1    | AP4B1-AS1    |             | 1321.306842 | 1359.876689 |             |

|                     |             |               |               |  |
|---------------------|-------------|---------------|---------------|--|
| 1198.212421         | 1421.673371 |               |               |  |
| KDM3A KDM3A         | 3355.978813 | 3025.446346   | 7390.167068   |  |
| 5105.014127         |             |               |               |  |
| TRIM17 TRIM17       | 10.54234182 | 2.031182508   | 17.85711506   |  |
| 19.79783872         |             |               |               |  |
| NCOA3 NCOA3         | 17038.76713 | 12434.89931   | 8799.986302   |  |
| 11558.1668          |             |               |               |  |
| SNAPIN SNAPIN       | 3276.325564 | 4036.975235   | 3785.708393   |  |
| 3365.632582         |             |               |               |  |
| ZC3H3 ZC3H3         | 2362.655939 | 2245.472263   | 1881.247072   |  |
| 1599.853919         |             |               |               |  |
| DCTN6 DCTN6         | 2111.982478 | 1859.547586   | 1748.211564   |  |
| 1834.599721         |             |               |               |  |
| DCUN1D4 DCUN1D4     | 1261.566905 | 1319.253039   | 1533.033328   |  |
| 1614.937987         |             |               |               |  |
| CFHR3 CFHR3         | 0 0         | 0 1.885508449 |               |  |
| RITA1 RITA1         | 2203.349441 | 3019.352798   | 1869.639947   |  |
| 2188.132556         |             |               |               |  |
| PTPN11 PTPN11       | 9481.079411 | 7072.577493   | 4576.77859    |  |
| 6011.000937         |             |               |               |  |
| TSLP TSLP           | 10.54234182 | 0 0           | 0.942754225   |  |
| GOLGA2P10 GOLGA2P10 |             | 2.342742627   | 0 2.678567259 |  |
| 0.942754225         |             |               |               |  |
| ACCS ACCS           | 383.0384195 | 309.7553325   | 220.535371    |  |
| 306.395123          |             |               |               |  |
| ACP5 ACP5           | 707.5082733 | 425.5327354   | 537.4991633   |  |
| 413.8691047         |             |               |               |  |
| KARS KARS           | 18125.7997  | 24247.24119   | 21064.25293   |  |
| 19891.17139         |             |               |               |  |
| POLR2D POLR2D       | 4601.146519 | 5587.78308    | 4235.707692   |  |
| 3657.886392         |             |               |               |  |
| SOCS3 SOCS3         | 3775.329743 | 1452.295493   | 3939.279582   |  |
| 4779.763919         |             |               |               |  |
| CAPN5 CAPN5         | 87.85284851 | 59.91988399   | 268.7495817   |  |
| 104.6457189         |             |               |               |  |
| ANXA3 ANXA3         | 18.74194102 | 205.1494333   | 20.53568232   |  |
| 11.3130507          |             |               |               |  |
| SLAMF1 SLAMF1       | 6256.294185 | 7167.02748    | 3791.958383   |  |
| 5908.240726         |             |               |               |  |
| CDKN1B CDKN1B       | 611.4558256 | 307.72415     | 436.6064632   |  |
| 425.1821553         |             |               |               |  |
| BEST1 BEST1         | 115.96576   | 199.0558858   | 164.2854586   |  |
| 119.7297865         |             |               |               |  |
| CA8 CA8             | 16.39919839 | 4.062365016   | 0 0           |  |
| XRCC6BP1 XRCC6BP1   |             | 781.3046661   | 923.1724499   |  |
| 623.2133156         | 613.7330003 |               |               |  |
| XP06 XP06           | 5486.703232 | 2682.176502   | 4663.385598   |  |
| 4433.773119         |             |               |               |  |
| PDLIM2 PDLIM2       | 1535.667792 | 2754.283481   | 1774.104381   |  |
| 1977.898363         |             |               |               |  |



|              |              |             |             |             |
|--------------|--------------|-------------|-------------|-------------|
| SS18L2       | SS18L2       | 3490.686514 | 3419.495752 | 3103.566598 |
| 3298.697032  |              |             |             |             |
| GPR15        | GPR15        | 4496.894472 | 4928.664356 | 696.4274874 |
| 1316.084898  |              |             |             |             |
| GPR3         | GPR3         | 35.1411394  | 46.71719769 | 36.60708587 |
| 49.02321969  |              |             |             |             |
| SLC39A6      | SLC39A6      | 4855.334094 | 4733.670835 | 4116.065021 |
| 4757.137818  |              |             |             |             |
| GLUD1        | GLUD1        | 10216.7006  | 12578.09768 | 8249.987158 |
| 9824.441776  |              |             |             |             |
| INSRR        | INSRR        | 5.856856567 | 5.07795627  | 0.892855753 |
| 5.656525348  |              |             |             |             |
| ZBTB40       | ZBTB40       | 2041.700199 | 1204.491227 | 2929.459726 |
| 2568.062508  |              |             |             |             |
| SH3BP5       | SH3BP5       | 6393.344629 | 5976.75453  | 2080.353905 |
| 2726.445218  |              |             |             |             |
| MCM2         | MCM2         | 27179.32859 | 34273.15805 | 12558.01617 |
| 17788.82947  |              |             |             |             |
| LOC100507250 | LOC100507250 |             | 35.1411394  | 44.68601518 |
| 98.21413283  | 84.84788022  |             |             |             |
| LOC642361    | LOC642361    |             | 235.445634  | 175.697287  |
| 238.3924861  | 332.7922413  |             |             |             |
| LOC493754    | LOC493754    |             | 911.3268819 | 823.644507  |
| 1541.961885  | 1126.591299  |             |             |             |
| HYAL3        | HYAL3        | 660.6534208 | 1333.471317 | 700.8917661 |
| 503.430756   |              |             |             |             |
| C6orf203     | C6orf203     |             | 586.857028  | 715.9918341 |
| 966.9627805  | 838.1085058  |             |             |             |
| IGFALS       | IGFALS       | 8.199599194 | 0           | 45.5356434  |
| 0            | 0            |             |             |             |
| ABC10        | ABC10        | 3833.898309 | 5298.339572 | 2617.853068 |
| 2584.08933   |              |             |             |             |
| IQCC         | IQCC         | 376.0101916 | 388.9714503 | 346.4280322 |
| 419.52563    |              |             |             |             |
| SNORD88A     | SNORD88A     |             | 0           | 1.015591254 |
| 2.828262674  |              |             |             | 0           |
| CTIF         | CTIF         | 5.856856567 | 5.07795627  | 40.17850889 |
| 16.96957604  |              |             |             |             |
| LY75-CD302   | LY75-CD302   |             | 2908.514971 | 2380.545899 |
| 4060.707965  | 4140.576555  |             |             |             |
| HBS1L        | HBS1L        | 12265.42902 | 10576.36732 | 6274.990232 |
| 8718.59107   |              |             |             |             |
| ZNF697       | ZNF697       | 0           | 6.093547524 | 14.28569205 |
| 0            | 0            |             |             | 7.542033798 |
| NDUFS3       | NDUFS3       | 3512.942569 | 4279.701545 | 2649.103019 |
| 2436.076917  |              |             |             |             |
| NDUFS2       | NDUFS2       | 12637.9251  | 20199.09445 | 11160.69691 |
| 10255.28046  |              |             |             |             |
| CDC42EP2     | CDC42EP2     |             | 46.85485254 | 61.9510665  |
| 175.8925833  | 48.08046546  |             |             |             |
| WNT11        | WNT11        | 0           | 0           | 2.678567259 |
| 0            | 0            |             |             | 1.885508449 |
| SKI          | SKI          | 179.219811  | 35.54569389 | 74.99988325 |

|              |              |             |             |             |
|--------------|--------------|-------------|-------------|-------------|
| 49.02321969  |              |             |             |             |
| RBL2         | RBL2         | 14932.6415  | 12806.60571 | 14608.01298 |
| 16638.66931  |              |             |             |             |
| GUCY1A2      | GUCY1A2      | 2.342742627 | 0           | 2.678567259 |
| GSTP1        | GSTP1        | 15723.31714 | 31166.4644  | 14958.01243 |
| 10893.52507  |              |             |             |             |
| BCKDK        | BCKDK        | 3414.547379 | 4511.25635  | 3153.56652  |
| 3095.06212   |              |             |             |             |
| L3MBTL3      | L3MBTL3      | 447.4638417 | 225.4612584 | 630.3561616 |
| 661.8134658  |              |             |             |             |
| MAPK1IP1L    | MAPK1IP1L    |             | 12607.46945 | 10964.32318 |
| 9528.556596  | 10679.51986  |             |             |             |
| RHOG         | RHOG         | 10535.31359 | 13470.80239 | 6825.882232 |
| 7853.142692  |              |             |             |             |
| VWA5A        | VWA5A        | 1516.925851 | 1462.451406 | 1392.854975 |
| 1286.859517  |              |             |             |             |
| PTK2B        | PTK2B        | 8856.738501 | 9337.34599  | 6891.953558 |
| 7348.769182  |              |             |             |             |
| ING3         | ING3         | 2513.762839 | 2331.797519 | 1604.461788 |
| 2042.005651  |              |             |             |             |
| HOXB6        | HOXB6        | 21.08468364 | 9.140321286 | 15.1785478  |
| 24.51160984  |              |             |             |             |
| UFSP2        | UFSP2        | 1567.294817 | 1764.082008 | 2024.996848 |
| 2573.719033  |              |             |             |             |
| TMEM74B      | TMEM74B      | 14.05645576 | 7.109138778 | 17.85711506 |
| 0.942754225  |              |             |             |             |
| MIS18BP1     | MIS18BP1     |             | 3797.585798 | 2711.628648 |
| 2217.853691  | 2954.59174   |             |             |             |
| CCDC92       | CCDC92       | 1322.478213 | 1585.337948 | 2229.460815 |
| 2360.656579  |              |             |             |             |
| PROSER1      | PROSER1      | 7315.213853 | 6696.808729 | 4558.921475 |
| 5314.305565  |              |             |             |             |
| MED21        | MED21        | 1933.934039 | 1719.395993 | 2039.28254  |
| 2062.746244  |              |             |             |             |
| FAM8A1       | FAM8A1       | 766.076839  | 460.0628381 | 1056.248356 |
| 773.0584643  |              |             |             |             |
| ATP5L        | ATP5L        | 15038.06492 | 12956.91322 | 8797.307735 |
| 8955.222381  |              |             |             |             |
| CDH1         | CDH1         | 201.4758659 | 222.4144846 | 70.53560449 |
| 284.7117759  |              |             |             |             |
| RFXANK       | RFXANK       | 2926.085541 | 3462.150585 | 2199.10372  |
| 2154.193403  |              |             |             |             |
| CD7          | CD7          | 3184.958601 | 2013.917457 | 1286.60514  |
| 2372.912384  |              |             |             |             |
| WIF1         | WIF1         | 10.54234182 | 0           | 11.60712479 |
| VPS26B       | VPS26B       | 5065.009559 | 5241.466462 | 3624.994357 |
| 3356.20504   |              |             |             |             |
| LOC100129361 | LOC100129361 |             | 1697.317033 | 2056.572289 |
| 2157.139499  | 1616.823495  |             |             |             |
| TARS2        | TARS2        | 3730.817633 | 5820.353477 | 4699.099828 |

|             |           |             |             |             |             |
|-------------|-----------|-------------|-------------|-------------|-------------|
| 4154.717868 |           |             |             |             |             |
| MST01       | MST01     | 1569.63756  | 2314.532468 | 2855.352698 |             |
| 2625.570516 |           |             |             |             |             |
| C11orf71    | C11orf71  |             | 475.5767533 | 493.5773495 |             |
| 813.391591  |           | 545.8546961 |             |             |             |
| BEAN1       | BEAN1     | 3.51411394  | 1.015591254 | 0           | 0           |
| PLEKHG5     | PLEKHG5   | 413.4940737 | 628.6509863 | 539.2848748 |             |
| 502.4880018 |           |             |             |             |             |
| KCNA6       | KCNA6     | 165.1633552 | 68.04461402 | 29.46423985 |             |
| 42.42394011 |           |             |             |             |             |
| ITPR1       | ITPR1     | 2714.067333 | 1926.576609 | 1727.675882 |             |
| 2379.511663 |           |             |             |             |             |
| LINC01337   | LINC01337 |             | 3.51411394  | 11.17150379 | 0           |
| 11.3130507  |           |             |             |             |             |
| MPZL1       | MPZL1     | 1642.262581 | 2114.460991 | 1648.21172  |             |
| 1506.521251 |           |             |             |             |             |
| VAPB        | VAPB      | 2601.615687 | 2063.681428 | 2381.246293 |             |
| 2256.953614 |           |             |             |             |             |
| CEP85       | CEP85     | 3036.194444 | 3495.665096 | 3158.030798 |             |
| 2436.076917 |           |             |             |             |             |
| PLCG1-AS1   | PLCG1-AS1 |             | 602.0848551 | 384.9090853 |             |
| 439.2850305 |           | 439.3234687 |             |             |             |
| RPN2        | RPN2      | 20245.98178 | 28506.63091 | 20026.75454 |             |
| 18830.57288 |           |             |             |             |             |
| RPL32       | RPL32     | 9340.514854 | 9805.533558 | 14590.15586 |             |
| 12637.62038 |           |             |             |             |             |
| ZNF814      | ZNF814    | 336.183567  | 264.0537261 | 425.8921942 |             |
| 530.7706285 |           |             |             |             |             |
| UBE2E4P     | UBE2E4P   | 2.342742627 | 3.046773762 | 0           | 0.942754225 |
| GALNT9      | GALNT9    | 1.171371313 | 2.031182508 | 23.21424958 |             |
| 1.885508449 |           |             |             |             |             |
| MAST4       | MAST4     | 4165.396391 | 2969.588827 | 1486.604829 |             |
| 1525.376336 |           |             |             |             |             |
| RALY-AS1    | RALY-AS1  |             | 74.96776406 | 54.84192772 |             |
| 65.17846997 |           | 36.76741476 |             |             |             |
| LINC01251   | LINC01251 |             | 0           | 0           | 2.828262674 |
| CRNKL1      | CRNKL1    | 3467.259088 | 3250.907604 | 2893.745496 |             |
| 3703.138595 |           |             |             |             |             |
| SF3B1       | SF3B1     | 37131.29927 | 37456.02104 | 31426.7368  |             |
| 34128.64569 |           |             |             |             |             |
| SEMA3E      | SEMA3E    | 0           | 0.892855753 | 0.942754225 |             |
| SNORD103A   | SNORD103A |             | 10.54234182 | 0           | 9.821413283 |
| 5.656525348 |           |             |             |             |             |
| KATNBL1P6   | KATNBL1P6 |             | 3.51411394  | 4.062365016 |             |
| 5.357134518 |           | 1.885508449 |             |             |             |
| ABCA1       | ABCA1     | 2.342742627 | 54.84192772 | 23.21424958 |             |
| 5.656525348 |           |             |             |             |             |
| SYNGR4      | SYNGR4    | 2.342742627 | 0           | 18.74997081 | 6.599279573 |
| MAGEH1      | MAGEH1    | 971.0668189 | 1214.64714  | 1276.783727 |             |
| 1469.753836 |           |             |             |             |             |

|                |                |             |             |             |             |   |
|----------------|----------------|-------------|-------------|-------------|-------------|---|
| PCDHGB2        | PCDHGB2        | 0           | 16.24946006 | 9.821413283 | 12.25580492 |   |
| TOX            | TOX            | 785.9901513 | 1331.440134 | 830.3558503 |             |   |
| 1250.092102    |                |             |             |             |             |   |
| NAGK           | NAGK           | 2502.049126 | 3597.224222 | 4152.672107 |             |   |
| 3221.391186    |                |             |             |             |             |   |
| KRI1           | KRI1           | 3270.468707 | 2706.550692 | 4223.207712 |             |   |
| 4705.286336    |                |             |             |             |             |   |
| PARP14         | PARP14         | 11509.89453 | 9615.617993 | 12736.58732 |             |   |
| 11341.33332    |                |             |             |             |             |   |
| ZNF551         | ZNF551         | 774.2764382 | 727.1633379 | 1066.069769 |             |   |
| 1339.653753    |                |             |             |             |             |   |
| ZNF721         | ZNF721         | 1533.325049 | 1227.849826 | 2567.853146 |             |   |
| 2382.339926    |                |             |             |             |             |   |
| CHRM5          | CHRM5          | 1.171371313 | 3.046773762 | 10.71426904 |             | 0 |
| DNTTIP2        | DNTTIP2        | 6529.223701 | 8626.432112 | 9184.807131 |             |   |
| 8650.712766    |                |             |             |             |             |   |
| ST7-AS2        | ST7-AS2        | 166.3347265 | 314.8332888 | 128.5712284 |             |   |
| 142.3558879    |                |             |             |             |             |   |
| LOC101927446   | LOC101927446   | 0           | 0           | 0.892855753 |             | 0 |
| MRPS26         | MRPS26         | 2636.756827 | 3649.019376 | 2984.816782 |             |   |
| 2929.137376    |                |             |             |             |             |   |
| SNAI1          | SNAI1          | 2.342742627 | 3.046773762 | 33.03566286 |             |   |
| 8.484788022    |                |             |             |             |             |   |
| SIX1           | SIX1           | 3.51411394  | 0           | 0           | 18.85508449 |   |
| CYB5R3         | CYB5R3         | 5361.366502 | 8496.436431 | 5829.455212 |             |   |
| 5207.774337    |                |             |             |             |             |   |
| FAM65A         | FAM65A         | 605.5989691 | 421.4703704 | 845.5343981 |             |   |
| 828.6809635    |                |             |             |             |             |   |
| RAP1GAP        | RAP1GAP        | 1.171371313 | 2.031182508 | 4.464278765 |             |   |
| 1.885508449    |                |             |             |             |             |   |
| SLC35F4        | SLC35F4        | 1.171371313 | 3.046773762 | 0           | 0           |   |
| CLNK           | CLNK           | 28.11291152 | 41.63924142 | 37.49994163 |             |   |
| 62.22177883    |                |             |             |             |             |   |
| MCTS1          | MCTS1          | 4419.583966 | 4075.567703 | 2458.031888 |             |   |
| 3355.262286    |                |             |             |             |             |   |
| MBOAT1         | MBOAT1         | 925.3833376 | 594.1208836 | 524.9991828 |             |   |
| 366.7313934    |                |             |             |             |             |   |
| VWA5B1         | VWA5B1         | 0           | 0           | 25.89281684 | 5.656525348 |   |
| SERPINI1       | SERPINI1       | 641.9632864 | 669.3554995 | 265.9012882 | 361.5504864 |   |
| NOSTRIN        | NOSTRIN        | 70.28227881 | 38.59246765 | 0           | 40.53843166 |   |
| TMUB1          | TMUB1          | 2123.696191 | 2774.595306 | 1825.890015 |             |   |
| 1549.887945    |                |             |             |             |             |   |
| PTGES3L-AARSD1 | PTGES3L-AARSD1 | 2033.925405 | 1760.122138 | 1518.097222 | 2330.781928 |   |
| HDAC11         | HDAC11         | 120.6512453 | 180.7752432 | 590.1776528 |             |   |
| 329.0212244    |                |             |             |             |             |   |
| USP44          | USP44          | 236.6170053 | 41.63924142 | 285.713841  |             |   |
| 317.7081737    |                |             |             |             |             |   |
| ASIC1          | ASIC1          | 36.31251072 | 58.90429273 | 38.39279738 |             |   |

|                 |             |             |             |             |  |
|-----------------|-------------|-------------|-------------|-------------|--|
| 29.22538097     |             |             |             |             |  |
| DOCK1 DOCK1     | 26.94154021 | 6.093547524 | 17.85711506 |             |  |
| 49.02321969     |             |             |             |             |  |
| NAA60 NAA60     | 4792.080043 | 4968.272415 | 4609.814253 |             |  |
| 3804.956051     |             |             |             |             |  |
| COL4A6 COL4A6   | 1.171371313 | 1.015591254 | 0           | 0.942754225 |  |
| GOT1 GOT1       | 2937.799254 | 4172.048872 | 2691.960095 |             |  |
| 2252.239843     |             |             |             |             |  |
| ARPC4-TTLL3     | ARPC4-TTLL3 | 7064.540391 | 7705.290844 |             |  |
| 4039.279427     | 4525.220279 |             |             |             |  |
| PCCB PCCB       | 3475.458687 | 4604.690746 | 2050.889665 |             |  |
| 2616.142974     |             |             |             |             |  |
| SNORD1A SNORD1A | 7.028227881 | 9.140321286 | 21.42853807 |             |  |
| 13.19855915     |             |             |             |             |  |
| AOAH AOAH       | 884.3853417 | 828.7224633 | 597.3204988 |             |  |
| 583.5648651     |             |             |             |             |  |
| YWHAQ YWHAQ     | 39958.98962 | 29513.08184 | 20554.43229 |             |  |
| 33534.71053     |             |             |             |             |  |
| CKAP4 CKAP4     | 294.0141997 | 599.1988399 | 1046.426943 |             |  |
| 506.2590187     |             |             |             |             |  |
| PKIA PKIA       | 4291.904493 | 5736.059403 | 2743.745729 |             |  |
| 2813.178607     |             |             |             |             |  |
| SUN2 SUN2       | 36212.94416 | 33299.20604 | 24714.24724 |             |  |
| 23634.84841     |             |             |             |             |  |
| SPAG4 SPAG4     | 52.71170911 | 50.7795627  | 32.14280711 |             |  |
| 68.8210584      |             |             |             |             |  |
| CBFA2T2 CBFA2T2 | 1656.319037 | 1418.780982 | 3043.745262 |             |  |
| 2007.123744     |             |             |             |             |  |
| S100A9 S100A9   | 5.856856567 | 8.124730032 | 1.785711506 |             |  |
| 2.828262674     |             |             |             |             |  |
| PITPNB PITPNB   | 3525.827654 | 4236.031121 | 3983.029514 |             |  |
| 3975.594566     |             |             |             |             |  |
| ZNF45 ZNF45     | 1281.480217 | 1097.854146 | 1666.068835 |             |  |
| 1792.175781     |             |             |             |             |  |
| TRAPPC10        | TRAPPC10    | 5452.733464 | 3482.46241  |             |  |
| 3771.422701     | 3744.619781 |             |             |             |  |
| GALR3 GALR3     | 17.5705697  | 11.17150379 | 0           | 3.771016899 |  |
| PBRM1 PBRM1     | 8176.171768 | 7033.985026 | 7109.810361 |             |  |
| 6145.814791     |             |             |             |             |  |
| PAPPA2 PAPPA2   | 0           | 0           | 2.678567259 | 0           |  |
| NFE2L1 NFE2L1   | 2069.813111 | 1203.475636 | 1834.818572 |             |  |
| 1430.158159     |             |             |             |             |  |
| CACFD1 CACFD1   | 71.45365012 | 81.24730032 | 100.8927001 |             |  |
| 109.3594901     |             |             |             |             |  |
| ZRANB1 ZRANB1   | 1304.907643 | 1080.589094 | 1961.604089 |             |  |
| 1526.31909      |             |             |             |             |  |
| RNF40 RNF40     | 5944.709416 | 4945.929407 | 4256.243375 |             |  |
| 4122.664225     |             |             |             |             |  |
| MMP14 MMP14     | 0           | 1.015591254 | 0           | 0           |  |
| FXN FXN         | 1787.512624 | 2901.544213 | 1394.640686 |             |  |

|             |           |             |             |   |             |
|-------------|-----------|-------------|-------------|---|-------------|
| 1089.823884 |           |             |             |   |             |
| CD1B        | CD1B      | 1.171371313 | 0           | 0 | 0           |
| LOC286367   | LOC286367 |             | 2.342742627 |   | 7.109138778 |
| 22.32139383 |           | 30.16813519 |             |   |             |
| MIR4754     | MIR4754   | 3.51411394  | 6.093547524 |   | 5.357134518 |
| SPRED2      | SPRED2    | 186.2480388 | 308.7397412 |   | 241.9639091 |
| 187.6080907 |           |             |             |   | 0           |
| FBL         | FBL       | 3858.497107 | 3801.358064 |   | 3354.459064 |
| 3182.738263 |           |             |             |   |             |
| TMEM56      | TMEM56    | 4.685485254 | 0           | 0 | 9.427542247 |
| TOP1MT      | TOP1MT    | 357.2682506 | 319.911245  |   | 893.7486088 |
| 787.1997776 |           |             |             |   |             |
| TRIM37      | TRIM37    | 2411.853534 | 2724.831335 |   | 2011.604012 |
| 2240.926792 |           |             |             |   |             |
| CLK1        | CLK1      | 2216.234525 | 1659.476109 |   | 5876.776566 |
| 5031.479297 |           |             |             |   |             |
| CXCR3       | CXCR3     | 8712.65983  | 10913.54362 |   | 3652.672886 |
| 3787.986475 |           |             |             |   |             |
| SLC4A10     | SLC4A10   | 449.8065844 | 61.9510665  |   | 89.2855753  |
| 466.6633412 |           |             |             |   |             |
| PDCD6       | PDCD6     | 6796.296361 | 8200.899376 |   | 7000.88196  |
| 7234.69592  |           |             |             |   |             |
| PEMT        | PEMT      | 735.6211849 | 1032.856305 |   | 801.7844662 |
| 723.0924904 |           |             |             |   |             |
| BAX         | BAX       | 7182.848894 | 6763.837752 |   | 5193.741915 |
| 3527.786309 |           |             |             |   |             |
| FBLN5       | FBLN5     | 262.3871742 | 115.777403  |   | 783.9273512 |
| 545.8546961 |           |             |             |   |             |
| SLC38A1     | SLC38A1   | 23829.20663 | 20259.01434 |   | 19523.1839  |
| 24587.97293 |           |             |             |   |             |
| PCNP        | PCNP      | 8184.371367 | 7719.509122 |   | 10941.94725 |
| 9729.223599 |           |             |             |   |             |
| MECR        | MECR      | 1301.393529 | 1667.600839 |   | 1097.31972  |
| 1306.657355 |           |             |             |   |             |
| PRSS36      | PRSS36    | 51.54033779 | 76.16934405 |   | 54.46420093 |
| 39.59567744 |           |             |             |   |             |
| PKIG        | PKIG      | 76.13913537 | 106.6370817 |   | 109.8212576 |
| 128.2145746 |           |             |             |   |             |
| DNM2        | DNM2      | 19420.16501 | 19954.33696 |   | 12593.7304  |
| 12333.11077 |           |             |             |   |             |
| PPM1B       | PPM1B     | 5662.408929 | 5906.678734 |   | 6293.740203 |
| 6231.605425 |           |             |             |   |             |
| PLXDC1      | PLXDC1    | 14.05645576 | 8.124730032 |   | 63.39275847 |
| 96.16093092 |           |             |             |   |             |
| GYS2        | GYS2      | 14.05645576 | 4.062365016 |   | 32.14280711 |
| 27.33987252 |           |             |             |   |             |
| CCDC87      | CCDC87    | 4.685485254 | 0           | 0 | 15.0840676  |
| RNF31       | RNF31     | 3914.72293  | 3855.1844   |   | 5314.277442 |
| 4036.87359  |           |             |             |   |             |
| TAF6L       | TAF6L     | 1379.875407 | 1559.948166 |   | 1533.033328 |

|             |           |             |             |             |
|-------------|-----------|-------------|-------------|-------------|
| 1318.91316  |           |             |             |             |
| CES4A       | CES4A     | 275.2722587 | 439.751013  | 138.3926417 |
| 271.5132167 |           |             |             |             |
| GNAI2       | GNAI2     | 50520.07338 | 60306.82426 | 24596.39028 |
| 28847.33652 |           |             |             |             |
| TRNT1       | TRNT1     | 2148.294989 | 2100.242713 | 2069.639636 |
| 2259.781877 |           |             |             |             |
| ZNF574      | ZNF574    | 2017.101402 | 3006.150112 | 4816.956788 |
| 3326.979659 |           |             |             |             |
| EXOSC9      | EXOSC9    | 4473.467046 | 4654.454717 | 3274.994902 |
| 3716.337154 |           |             |             |             |
| LRRC2       | LRRC2     | 40.99799597 | 23.35859884 | 39.28565313 |
| 24.51160984 |           |             |             |             |
| IRF2BPL     | IRF2BPL   | 336.183567  | 192.9623383 | 457.1421456 |
| 417.6401215 |           |             |             |             |
| NPEPPS      | NPEPPS    | 5992.73564  | 5290.214842 | 4299.993307 |
| 5615.986917 |           |             |             |             |
| CD70        | CD70      | 3303.267104 | 8200.899376 | 1384.819273 |
| 1122.820282 |           |             |             |             |
| SPATA5      | SPATA5    | 787.1615226 | 776.9273093 | 527.67775   |
| 626.9315594 |           |             |             |             |
| GPR124      | GPR124    | 114.7943887 | 111.7150379 | 127.6783727 |
| 113.130507  |           |             |             |             |
| FAM126A     | FAM126A   | 7598.68571  | 8395.892897 | 2133.92525  |
| 2903.683012 |           |             |             |             |
| ZSCAN21     | ZSCAN21   | 545.8590321 | 689.5864615 | 911.6057238 |
| 763.630922  |           |             |             |             |
| TXNDC11     | TXNDC11   | 9806.720636 | 9809.595923 | 5185.706214 |
| 5573.562977 |           |             |             |             |
| CLDN6       | CLDN6     | 0           | 2.031182508 | 0           |
| PCMTD1      | PCMTD1    | 1286.165702 | 867.314931  | 2172.318047 |
| 2013.723024 |           |             |             |             |
| TPI1P2      | TPI1P2    | 67.93953618 | 27.42096386 | 43.7499319  |
| 36.76741476 |           |             |             |             |
| POLE4       | POLE4     | 1769.942055 | 3333.170496 | 2185.710883 |
| 1341.539262 |           |             |             |             |
| PREX1       | PREX1     | 13149.81436 | 9200.24117  | 3841.958305 |
| 6369.247542 |           |             |             |             |
| DHRS4       | DHRS4     | 961.6958484 | 1102.932102 | 824.10586   |
| 1100.19418  |           |             |             |             |
| CDK5R1      | CDK5R1    | 79.65324932 | 116.7929942 | 729.4631502 |
| 574.1373229 |           |             |             |             |
| LCMT1-AS2   | LCMT1-AS2 |             | 7.028227881 | 0           |
| 14.14131337 |           |             |             | 0           |
| FANCI       | FANCI     | 16319.54514 | 14792.08662 | 6468.739931 |
| 9958.312876 |           |             |             |             |
| POLR3B      | POLR3B    | 1062.433781 | 1273.551433 | 1059.819779 |
| 1247.263839 |           |             |             |             |
| SPRY2       | SPRY2     | 21.08468364 | 1.015591254 | 33.92851862 |
| 20.74059294 |           |             |             |             |

|             |          |             |             |             |
|-------------|----------|-------------|-------------|-------------|
| FAM174B     | FAM174B  | 811.7603202 | 681.4617315 | 308.0352348 |
| 357.3038512 |          |             |             |             |
| RBPMS2      | RBPMS2   | 1.171371313 | 0           | 0           |
| PCNXL4      | PCNXL4   | 2231.462352 | 1965.169077 | 2132.139538 |
| 2475.672594 |          |             |             |             |
| ZDHHC6      | ZDHHC6   | 5170.432978 | 4342.668202 | 4254.457663 |
| 4983.398832 |          |             |             |             |
| CDK18       | CDK18    | 2.342742627 | 0           | 88.39271955 |
| PARP12      | PARP12   | 6396.858743 | 5597.938992 | 20.74059294 |
| 9055.154328 |          |             | 7516.952585 |             |
| EML3        | EML3     | 3020.966617 | 1706.193307 | 1682.140239 |
| 1993.925185 |          |             |             |             |
| SLC29A4     | SLC29A4  | 1.171371313 | 0           | 0           |
| NPHP3       | NPHP3    | 445.1210991 | 188.8999733 | 8.484788022 |
| 670.2982538 |          |             |             | 710.7131794 |
| SIK2        | SIK2     | 153.4496421 | 41.63924142 | 41.07136464 |
| 41.48118589 |          |             |             |             |
| TMEM259     | TMEM259  | 8945.762721 | 7724.587078 | 7785.702166 |
| 7832.402099 |          |             |             |             |
| ZNF436      | ZNF436   | 746.1635267 | 632.7133513 | 1319.640803 |
| 1070.968799 |          |             |             |             |
| COX7C       | COX7C    | 10883.21087 | 10581.44528 | 9533.913731 |
| 9502.019831 |          |             |             |             |
| FBN2        | FBN2     | 0           | 0           | 2.828262674 |
| CLDN2       | CLDN2    | 3.51411394  | 0           | 0           |
| FAM131A     | FAM131A  | 161.6492413 | 45.70160643 | 133.928363  |
| 102.7602105 |          |             |             |             |
| TCTN2       | TCTN2    | 134.707701  | 108.6682642 | 104.4641231 |
| 115.9587696 |          |             |             |             |
| DNM3        | DNM3     | 58.56856567 | 66.01343151 | 33.03566286 |
| 107.4739816 |          |             |             |             |
| MIR2110     | MIR2110  | 114.7943887 | 141.1671843 | 254.4638896 |
| 200.8066499 |          |             |             |             |
| MIR2052     | MIR2052  | 1.171371313 | 0           | 0           |
| MIR1914     | MIR1914  | 2.342742627 | 12.18709505 | 2.678567259 |
| 1.885508449 |          |             |             |             |
| MIR1909     | MIR1909  | 22.25605496 | 10.15591254 | 9.821413283 |
| 9.427542247 |          |             |             |             |
| MIR320D1    | MIR320D1 | 0.942754225 | 1.171371313 | 0           |
|             |          |             |             | 0.892855753 |
| MIR103B2    | MIR103B2 | 36.60708587 | 15.22782708 | 9.140321286 |
| 43.36669434 |          |             |             |             |
| FBLIM1      | FBLIM1   | 2.342742627 | 0           | 1.785711506 |
| C21orf91    | C21orf91 | 3340.173372 | 3713.247064 | 1.885508449 |
| 4040.644607 |          |             | 3446.916716 |             |
| GTF2IRD2    | GTF2IRD2 | 888.3914743 | 159.3064986 | 267.1004998 |
| 490.2321969 |          |             |             |             |
| SBK1        | SBK1     | 548.2017747 | 277.2564124 | 562.4991244 |
| 513.8010525 |          |             |             |             |
| INTS1       | INTS1    | 6908.748007 | 4091.817163 | 3541.065917 |



|             |             |             |             |             |
|-------------|-------------|-------------|-------------|-------------|
| 3666.37118  |             |             |             |             |
| S100A11     | S100A11     | 13757.75608 | 17074.12016 | 10212.4841  |
| 9979.053469 |             |             |             |             |
| HDAC1       | HDAC1       | 22790.20027 | 23921.2364  | 12859.80141 |
| 15503.59323 |             |             |             |             |
| SNAPC4      | SNAPC4      | 803.560721  | 465.1407944 | 349.1065994 |
| 520.400332  |             |             |             |             |
| EIF5        | EIF5        | 11176.0537  | 13291.04274 | 18518.72117 |
| 15142.51836 |             |             |             |             |
| SNAPC2      | SNAPC2      | 1171.371313 | 1439.092807 | 1286.60514  |
| 1089.823884 |             |             |             |             |
| CALM3       | CALM3       | 23202.52298 | 24057.32563 | 11554.4463  |
| 10016.76364 |             |             |             |             |
| FCF1        | FCF1        | 2143.609504 | 1246.130469 | 2070.532491 |
| 1560.258242 |             |             |             |             |
| CCP110      | CCP110      | 4949.043799 | 4132.440813 | 2465.174734 |
| 3209.135381 |             |             |             |             |
| NEU3        | NEU3        | 313.927512  | 283.3499599 | 225.8925055 |
| 277.1697421 |             |             |             |             |
| CPLX2       | CPLX2       | 4.685485254 | 0           | 0           |
| AAAS        | AAAS        | 3721.446663 | 5657.858876 | 3520.530234 |
| 3514.58775  |             |             |             |             |
| PNMA2       | PNMA2       | 7.028227881 | 3.046773762 | 30.3570956  |
| 18.85508449 |             |             |             |             |
| PTGES       | PTGES       | 2.342742627 | 2.031182508 | 0           |
| GOSR1       | GOSR1       | 3134.589635 | 3068.101178 | 0.942754225 |
| 3287.383982 |             |             |             | 3570.530156 |
| ITM2A       | ITM2A       | 27263.66732 | 21892.08507 | 15074.08368 |
| 19143.56729 |             |             |             |             |
| SNF8        | SNF8        | 4693.684853 | 6310.884053 | 3488.387427 |
| 3612.634189 |             |             |             |             |
| COL2A1      | COL2A1      | 0           | 5.357134518 | 1.885508449 |
| CD48        | CD48        | 5308.654793 | 6973.04955  | 6928.560644 |
| 6049.65386  |             |             |             |             |
| TBC1D2      | TBC1D2      | 681.7381044 | 791.1455869 | 864.2843689 |
| 733.4627868 |             |             |             |             |
| AGPAT4      | AGPAT4      | 126.5081019 | 95.46557788 | 66.07132572 |
| 60.33627038 |             |             |             |             |
| LZTFL1      | LZTFL1      | 206.1613512 | 313.8176975 | 624.1061714 |
| 426.1249096 |             |             |             |             |
| ST7-AS1     | ST7-AS1     | 158.1351273 | 244.7574922 | 106.2498346 |
| 84.84788022 |             |             |             |             |
| CENPBD1P1   | CENPBD1P1   |             | 1054.234182 | 1049.105765 |
| 1178.569594 | 927.6701571 |             |             |             |
| PKD1        | PKD1        | 611.4558256 | 243.741901  | 599.999066  |
| 656.1569404 |             |             |             |             |
| ARAF        | ARAF        | 6318.376865 | 8127.776806 | 6789.275146 |
| 5536.795562 |             |             |             |             |
| SHROOM2     | SHROOM2     | 9.370970508 | 0           | 0           |
| PPFIA1      | PPFIA1      | 2160.008702 | 2032.198099 | 2226.782248 |

|             |             |             |             |             |             |
|-------------|-------------|-------------|-------------|-------------|-------------|
| 2140.05209  |             |             |             |             |             |
| CYP26A1     | CYP26A1     | 0           | 7.109138778 | 21.42853807 | 0           |
| TMC4        | TMC4        | 50.36896648 | 16.24946006 | 12.49998054 |             |
| 28.28262674 |             |             |             |             |             |
| DAP         | DAP         | 4944.358314 | 7484.907542 | 5017.849332 |             |
| 4605.354388 |             |             |             |             |             |
| CREBBP      | CREBBP      | 1898.792899 | 863.2525659 | 1736.60444  |             |
| 1560.258242 |             |             |             |             |             |
| SLC25A36    | SLC25A36    |             | 1481.784712 | 1428.936894 |             |
| 2375.889159 | 2341.801494 |             |             |             |             |
| OR8H1       | OR8H1       | 0           | 0           | 0.942754225 |             |
| GPM6B       | GPM6B       | 32.79839678 | 25.38978135 | 108.0355461 |             |
| 96.16093092 |             |             |             |             |             |
| PGM2L1      | PGM2L1      | 1035.492241 | 1414.718617 | 1567.854702 |             |
| 1091.709392 |             |             |             |             |             |
| CDCP2       | CDCP2       | 1.171371313 | 1.015591254 | 0           | 5.656525348 |
| PDCL3       | PDCL3       | 2796.063325 | 3924.244606 | 2465.174734 |             |
| 2252.239843 |             |             |             |             |             |
| GPR19       | GPR19       | 1154.972115 | 684.5085052 | 166.0711701 |             |
| 811.7113875 |             |             |             |             |             |
| DYNC1LI2    | DYNC1LI2    |             | 2304.087374 | 2105.32067  |             |
| 2420.531946 | 2478.500857 |             |             |             |             |
| LARP7       | LARP7       | 2156.494588 | 2070.790567 | 2280.353593 |             |
| 2325.774672 |             |             |             |             |             |
| HLA-DRB3    | HLA-DRB3    |             | 5.856856567 | 10.15591254 |             |
| 2.678567259 | 1.885508449 |             |             |             |             |
| ACKR4       | ACKR4       | 4.685485254 | 1.015591254 | 0           | 12.25580492 |
| RNF169      | RNF169      | 783.6474087 | 645.9160376 | 1167.855325 |             |
| 979.5216395 |             |             |             |             |             |
| KDM6B       | KDM6B       | 172.1915831 | 97.49676039 | 399.1065216 |             |
| 395.0140202 |             |             |             |             |             |
| SEZ6        | SEZ6        | 22.25605496 | 12.18709505 | 56.24991244 |             |
| 25.45436407 |             |             |             |             |             |
| HTR1E       | HTR1E       | 0           | 0           | 0.892855753 | 0.942754225 |
| GALNT4      | GALNT4      | 1218.226166 | 1598.540634 | 978.5699053 |             |
| 1089.823884 |             |             |             |             |             |
| IK          | IK          | 8460.814997 | 10299.11091 | 11464.26787 |             |
| 9744.307667 |             |             |             |             |             |
| TMEM97      | TMEM97      | 2197.492584 | 2826.39046  | 1944.63983  |             |
| 2207.930394 |             |             |             |             |             |
| TM9SF4      | TM9SF4      | 4184.138332 | 4255.327354 | 4591.957138 |             |
| 4375.322357 |             |             |             |             |             |
| MLEC        | MLEC        | 9934.400109 | 8928.062714 | 6816.953674 |             |
| 7325.200326 |             |             |             |             |             |
| PHYHIP      | PHYHIP      | 0           | 2.031182508 | 71.42846024 | 0           |
| SNX19       | SNX19       | 4643.315887 | 3599.255404 | 4668.742733 |             |
| 5539.623824 |             |             |             |             |             |
| PHACTR2     | PHACTR2     | 3201.3578   | 3058.960857 | 1940.175551 |             |
| 3138.428814 |             |             |             |             |             |
| PRKRA       | PRKRA       | 2439.966446 | 2505.463624 | 3399.994708 |             |

|                 |              |             |             |             |
|-----------------|--------------|-------------|-------------|-------------|
| 3140.314323     |              |             |             |             |
| AKR7A2 AKR7A2   | 3518.799426  | 4784.450398 | 2840.17415  |             |
| 3060.180213     |              |             |             |             |
| TNFRSF10C       | TNFRSF10C    | 0           | 0           | 25.89281684 |
| 2.828262674     |              |             |             |             |
| FADD FADD       | 3200.186428  | 3568.787667 | 2999.102474 |             |
| 2581.261067     |              |             |             |             |
| FAM168A FAM168A | 475.5767533  | 191.946747  | 257.1424569 |             |
| 278.1124963     |              |             |             |             |
| FOXD2 FOXD2     | 44.51210991  | 42.65483267 | 59.82133545 |             |
| 57.50800771     |              |             |             |             |
| GOSR2 GOSR2     | 4614.031604  | 6227.60557  | 4841.063893 |             |
| 4673.232692     |              |             |             |             |
| ARID1A ARID1A   | 3327.865902  | 1922.514244 | 2621.424491 |             |
| 2436.076917     |              |             |             |             |
| C11orf24        | C11orf24     | 1253.367305 | 1753.926096 |             |
| 2182.13946      | 1220.866721  |             |             |             |
| ITGB1BP1        | ITGB1BP1     | 6852.522184 | 8251.678939 |             |
| 4064.279388     | 4924.005316  |             |             |             |
| MY01E MY01E     | 3092.420268  | 4366.026801 | 399.1065216 |             |
| 435.5524518     |              |             |             |             |
| NUP133 NUP133   | 4057.63023   | 4598.597198 | 3303.566286 |             |
| 3975.594566     |              |             |             |             |
| CISD1 CISD1     | 2444.651931  | 2467.886747 | 1574.104693 |             |
| 1855.340314     |              |             |             |             |
| LOC101060351    | LOC101060351 | 69.11090749 | 30.46773762 |             |
| 64.28561422     | 82.01961755  |             |             |             |
| ARMCX4 ARMCX4   | 31.62702546  | 16.24946006 | 58.03562395 |             |
| 56.56525348     |              |             |             |             |
| C11orf45        | C11orf45     | 8.199599194 | 0           | 30.3570956  |
| 2.828262674     |              |             |             |             |
| ISG20L2 ISG20L2 | 2400.139821  | 3240.751692 | 2501.78182  |             |
| 2405.908781     |              |             |             |             |
| ARPC5L ARPC5L   | 5157.547893  | 6035.658823 | 3965.172399 |             |
| 4489.395618     |              |             |             |             |
| FAM47E-STBD1    | FAM47E-STBD1 | 215.5323217 | 273.1940473 |             |
| 152.6783338     | 183.8370738  |             |             |             |
| DNAI1 DNAI1     | 0            | 0           | 1.785711506 | 0           |
| TFIP11 TFIP11   | 6591.306381  | 8069.888105 | 6887.489279 |             |
| 7042.374059     |              |             |             |             |
| CCNDBP1 CCNDBP1 | 7923.155564  | 9798.424419 | 8224.094341 |             |
| 8217.045823     |              |             |             |             |
| INTS6 INTS6     | 4539.06384   | 3473.322089 | 3886.601093 |             |
| 3988.793125     |              |             |             |             |
| DDX41 DDX41     | 4130.255251  | 5578.642758 | 4182.136347 |             |
| 4332.898417     |              |             |             |             |
| POLK POLK       | 2211.54904   | 2036.260464 | 2129.460971 |             |
| 2292.778275     |              |             |             |             |
| KLRK1 KLRK1     | 7.028227881  | 847.0031059 | 2495.53183  |             |
| 84.84788022     |              |             |             |             |

|             |         |             |             |             |
|-------------|---------|-------------|-------------|-------------|
| TSPYL5      | TSPYL5  | 275.2722587 | 177.7284695 | 279.4638507 |
| 130.100083  |         |             |             |             |
| CARKD       | CARKD   | 2472.764843 | 2618.194253 | 2827.67417  |
| 2506.783484 |         |             |             |             |
| FAM86EP     | FAM86EP | 97.22381902 | 172.6505132 | 332.1423401 |
| 230.9747851 |         |             |             |             |
| FAM86JP     | FAM86JP | 45.68348122 | 46.71719769 | 115.1783921 |
| 94.27542247 |         |             |             |             |
| LRRC10B     | LRRC10B | 0           | 2.678567259 | 0           |
| ITIH3       | ITIH3   | 0           | 8.035701777 | 0           |
| PIGV        | PIGV    | 605.5989691 | 1280.660571 | 1202.676699 |
| 1037.972401 |         |             |             |             |
| ACADS       | ACADS   | 1834.367477 | 2240.394306 | 2001.782598 |
| 1929.817898 |         |             |             |             |
| MFAP4       | MFAP4   | 38.65525334 | 23.35859884 | 32.14280711 |
| 34.88190631 |         |             |             |             |
| DMXL1       | DMXL1   | 1268.595132 | 570.7622848 | 989.2841744 |
| 1019.117317 |         |             |             |             |
| GPR113      | GPR113  | 234.2742627 | 159.4478269 | 152.6783338 |
| 98.04643937 |         |             |             |             |
| CMKLR1      | CMKLR1  | 14.05645576 | 0           | 1.785711506 |
| APCDD1L     | APCDD1L | 0           | 10.71426904 | 0           |
| PARP2       | PARP2   | 2108.468364 | 2376.483534 | 2253.567921 |
| 2208.873149 |         |             |             |             |
| IL18RAP     | IL18RAP | 743.820784  | 556.5440072 | 752.6773998 |
| 1122.820282 |         |             |             |             |
| CAV2        | CAV2    | 0           | 2.031182508 | 14.28569205 |
| TUBB2A      | TUBB2A  | 201.4758659 | 270.1472736 | 0.942754225 |
| 477.9763919 |         |             |             |             |
| KCNK15      | KCNK15  | 3.51411394  | 4.062365016 | 25.89281684 |
| 73.53482953 |         |             |             |             |
| APPL1       | APPL1   | 2975.283136 | 2056.572289 | 2001.782598 |
| 2470.958823 |         |             |             |             |
| CD8A        | CD8A    | 121.8226166 | 1583.306765 | 2866.959823 |
| 124.4435577 |         |             |             |             |
| HSPA14      | HSPA14  | 4995.898652 | 5354.197091 | 4259.814798 |
| 4423.402822 |         |             |             |             |
| ZNF292      | ZNF292  | 5250.086227 | 2886.310344 | 4491.957293 |
| 4838.214681 |         |             |             |             |
| 15-Sep      | 15-Sep  | 8628.321095 | 8575.652549 | 10030.34153 |
| 9317.240003 |         |             |             |             |
| TOX4        | TOX4    | 6054.818319 | 5456.771808 | 5430.34869  |
| 4594.041337 |         |             |             |             |
| S100A16     | S100A16 | 3.51411394  | 0           | 0           |
| CLEC4D      | CLEC4D  | 2.342742627 | 6.093547524 | 3.771016899 |
| GPKOW       | GPKOW   | 2450.508788 | 3585.037127 | 0           |
| 2206.98764  |         |             |             | 0           |
| FRMD8       | FRMD8   | 6669.788259 | 6897.895798 | 2216.067979 |
| 4987.169849 |         |             |             |             |
| AGGF1       | AGGF1   | 2955.369824 | 2816.234547 | 5060.706408 |
|             |         |             |             | 3078.566636 |

|             |           |             |             |               |               |
|-------------|-----------|-------------|-------------|---------------|---------------|
| 3399.571734 |           |             |             |               |               |
| PPIAL4E     | PPIAL4E   | 0           | 0           | 0             | 0.942754225   |
| MIR6501     | MIR6501   | 263.5585455 |             | 207.1806158   | 265.1781587   |
| 285.6545301 |           |             |             |               |               |
| MIR6133     | MIR6133   | 0           | 1.015591254 | 0             | 0             |
| MIR6132     | MIR6132   | 0           | 0           | 3.571423012   | 0             |
| MIR378J     | MIR378J   | 3.51411394  |             | 1.015591254   | 0 1.885508449 |
| MIR6126     | MIR6126   | 309.2420268 |             | 331.0827488   | 291.9638312   |
| 265.8566914 |           |             |             |               |               |
| MIR6125     | MIR6125   | 222.5605496 |             | 311.786515    | 446.4278765   |
| 312.9944026 |           |             |             |               |               |
| MIR6124     | MIR6124   | 3.51411394  |             | 4.062365016   | 0 5.656525348 |
| MIR6090     | MIR6090   | 35.1411394  |             | 26.40537261   | 8.035701777   |
| 16.02682182 |           |             |             |               |               |
| C2orf71     | C2orf71   | 1.171371313 |             | 0 3.571423012 | 0             |
| ATP6V1C2    | ATP6V1C2  |             |             | 8511.183964   | 10266.61199   |
| 5805.348106 |           | 8125.598663 |             |               |               |
| HNRNPUL2    | HNRNPUL2  |             |             | 1142.087031   | 849.0342884   |
| 882.141484  |           | 601.4771954 |             |               |               |
| DPYSL5      | DPYSL5    | 4.685485254 |             | 2.031182508   | 0 12.25580492 |
| LINC00852   | LINC00852 |             |             | 125.3367305   | 88.3564391    |
| 58.9284797  |           | 67.87830418 |             |               |               |
| ERBB2IP     | ERBB2IP   | 5696.378697 |             | 3218.408684   | 5466.955776   |
| 5369.928064 |           |             |             |               |               |
| MIR93       | MIR93     | 28.11291152 |             | 31.48332888   | 33.03566286   |
| 29.22538097 |           |             |             |               |               |
| SERHL       | SERHL     | 1769.942055 |             | 1179.101446   | 1037.498385   |
| 2605.772677 |           |             |             |               |               |
| MT1DP       | MT1DP     | 7.028227881 |             | 1.015591254   | 13.3928363    |
| 12.25580492 |           |             |             |               |               |
| C3orf17     | C3orf17   | 1682.089206 |             | 1673.694387   | 2941.959706   |
| 2706.647379 |           |             |             |               |               |
| RUVBL2      | RUVBL2    | 7903.242252 |             | 11976.86766   | 5799.990972   |
| 6053.424877 |           |             |             |               |               |
| UCA1        | UCA1      | 2.342742627 |             | 6.093547524   | 8.035701777   |
| 25.45436407 |           |             |             |               |               |
| PPWD1       | PPWD1     | 3949.864069 |             | 3865.340313   | 3741.958461   |
| 4051.014904 |           |             |             |               |               |
| ERLIN2      | ERLIN2    | 350.2400227 |             | 405.2209104   | 518.7491925   |
| 427.0676638 |           |             |             |               |               |
| TARP        | TARP      | 179.219811  |             | 309.7553325   | 192.8568427   |
| 133.8710999 |           |             |             |               |               |
| SEMA6B      | SEMA6B    | 0           | 0           | 0.892855753   | 0.942754225   |
| ABCC9       | ABCC9     | 0           | 1.015591254 | 4.464278765   | 2.828262674   |
| GTSF1L      | GTSF1L    | 12.88508445 |             | 21.32741634   | 17.85711506   |
| 15.0840676  |           |             |             |               |               |
| PKHD1       | PKHD1     | 0           | 0           | 8.92855753    | 2.828262674   |
| FAM151A     | FAM151A   | 31.62702546 |             | 34.53010264   | 0 44.30944856 |
| MTFR2       | MTFR2     | 1864.823131 |             | 2024.073369   | 635.7132962   |
| 971.0368515 |           |             |             |               |               |

|                 |               |               |               |
|-----------------|---------------|---------------|---------------|
| C14orf93        | C14orf93      | 379.5243056   | 499.670897    |
| 418.7493482     | 412.9263504   |               |               |
| FHDC1 FHDC1     | 1.171371313   | 0 0           | 0             |
| C17orf58        | C17orf58      | 700.4800454   | 705.8359216   |
| 442.8564535     | 530.7706285   |               |               |
| BCL2 BCL2       | 1417.359289   | 1388.313244   | 2397.317697   |
| 1871.367136     |               |               |               |
| FAAH FAAH       | 60.9113083    | 55.85751897   | 210.7139577   |
| 158.3827098     |               |               |               |
| IGHMBP2 IGHMBP2 | 1397.445977   | 1594.478269   | 1172.319604   |
| 973.8651141     |               |               |               |
| IFNB1 IFNB1     | 1.171371313   | 0 7.142846024 | 4.713771124   |
| IDH2 IDH2       | 16797.46464   | 20015.27243   | 12666.94457   |
| 13950.87702     |               |               |               |
| MAP2K6 MAP2K6   | 270.5867734   | 159.4478269   | 51.78563368   |
| 148.9551675     |               |               |               |
| DCTN2 DCTN2     | 8029.750354   | 10625.1157    | 6286.597357   |
| 6620.96292      |               |               |               |
| VMP1 VMP1       | 5575.727452   | 5815.275521   | 4483.921592   |
| 4783.534936     |               |               |               |
| CLSTN1 CLSTN1   | 4584.747321   | 2594.835654   | 2768.74569    |
| 2904.625766     |               |               |               |
| ENDOD1 ENDOD1   | 1621.177898   | 1078.557912   | 1080.355461   |
| 1970.35633      |               |               |               |
| PLEKHA6 PLEKHA6 | 0 4.062365016 | 33.03566286   | 38.65292321   |
| PPP6R1 PPP6R1   | 20354.91931   | 19318.57683   | 13577.65744   |
| 13756.66965     |               |               |               |
| GOLPH3L GOLPH3L | 1858.966274   | 2091.102392   | 1756.247266   |
| 1987.325906     |               |               |               |
| YLPM1 YLPM1     | 4211.079872   | 2977.713557   | 3192.852173   |
| 3367.518091     |               |               |               |
| MRPS10 MRPS10   | 5076.723273   | 5410.05461    | 4000.886629   |
| 4469.597779     |               |               |               |
| EMC9 EMC9       | 1376.361293   | 1358.861098   | 1506.247655   |
| 1319.855915     |               |               |               |
| RAB26 RAB26     | 90.19559114   | 13.2026863    | 74.1070275    |
| 66.93554995     |               |               |               |
| CCDC109B        | CCDC109B      | 9005.502658   | 8644.712754   |
| 8551.772403     | 8232.12989    |               |               |
| C1orf198        | C1orf198      | 967.5527049   | 758.6466668   |
| 1391.962119     | 1237.836297   |               |               |
| GPR128 GPR128   | 0 0           | 0 0.942754225 |               |
| CC2D1B CC2D1B   | 1999.530832   | 1552.839027   | 1837.49714    |
| 2009.952007     |               |               |               |
| ST8SIA5 ST8SIA5 | 9.370970508   | 35.54569389   | 0 7.542033798 |
| FLJ41278        | FLJ41278      | 36.31251072   | 3.046773762   |
| 1.785711506     | 9.427542247   |               |               |
| PPM1D PPM1D     | 2019.444144   | 2380.545899   | 2811.602766   |
| 1687.530062     |               |               |               |
| NUDT15 NUDT15   | 2033.5006     | 2328.750746   | 1887.497062   |

|                 |             |  |             |             |   |
|-----------------|-------------|--|-------------|-------------|---|
| 1517.834302     |             |  |             |             |   |
| KIAA1549L       | KIAA1549L   |  | 10.54234182 | 25.38978135 |   |
| 11.60712479     | 0           |  |             |             |   |
| VPS13D VPS13D   | 2513.762839 |  | 1392.375609 | 2757.138565 |   |
| 2603.887169     |             |  |             |             |   |
| AKIRIN2 AKIRIN2 | 3039.708558 |  | 3434.729621 | 2674.10298  |   |
| 2832.976445     |             |  |             |             |   |
| ZEB1-AS1        | ZEB1-AS1    |  | 167.5060978 | 170.6193307 |   |
| 182.1425736     | 198.9211414 |  |             |             |   |
| LINC00599       | LINC00599   |  | 30.45565415 | 41.63924142 |   |
| 42.85707615     | 0           |  |             |             |   |
| FLJ37453        | FLJ37453    |  | 408.8085884 | 463.1096118 |   |
| 741.070275      | 577.9083398 |  |             |             |   |
| SEPT7P2 SEPT7P2 | 481.4336098 |  | 355.4569389 | 836.6058406 |   |
| 716.4932108     |             |  |             |             |   |
| ARL3 ARL3       | 1300.222158 |  | 1259.333155 | 856.2486672 |   |
| 844.7077853     |             |  |             |             |   |
| ABCB7 ABCB7     | 1328.335069 |  | 1163.867577 | 1107.141134 |   |
| 1121.877527     |             |  |             |             |   |
| RASL10A RASL10A | 1.171371313 |  | 3.046773762 | 0 0         |   |
| FLII FLII       | 19020.72739 |  | 22265.82265 | 13739.26433 |   |
| 15594.09763     |             |  |             |             |   |
| ASAP3 ASAP3     | 10.54234182 |  | 4.062365016 | 78.57130627 |   |
| 33.93915209     |             |  |             |             |   |
| FHOD3 FHOD3     | 84.33873457 |  | 89.37203036 | 104.4641231 |   |
| 65.99279573     |             |  |             |             |   |
| SH2D7 SH2D7     | 3.51411394  |  | 2.031182508 | 0.892855753 |   |
| 4.713771124     |             |  |             |             |   |
| PNMA3 PNMA3     | 38.65525334 |  | 35.54569389 | 10.71426904 |   |
| 16.02682182     |             |  |             |             |   |
| PGAM5 PGAM5     | 5335.596333 |  | 7058.359216 | 3999.100918 |   |
| 3846.437237     |             |  |             |             |   |
| TKTL1 TKTL1     | 106.5947895 |  | 100.5435342 | 9.821413283 |   |
| 31.11088942     |             |  |             |             |   |
| ANKRD37 ANKRD37 | 265.9012882 |  | 298.5838287 | 352.6780224 |   |
| 442.1517314     |             |  |             |             |   |
| METTL2A METTL2A | 1082.347094 |  | 1473.62291  | 1084.81974  |   |
| 1129.419561     |             |  |             |             |   |
| TMC03 TMC03     | 2029.986486 |  | 2212.973343 | 1212.498113 |   |
| 1906.249042     |             |  |             |             |   |
| CPPED1 CPPED1   | 2113.153849 |  | 2101.258305 | 1124.998249 |   |
| 1271.775449     |             |  |             |             |   |
| CFAP44 CFAP44   | 85.51010588 |  | 11.17150379 | 130.3569399 |   |
| 102.7602105     |             |  |             |             |   |
| CHDH CHDH       | 277.6150013 |  | 1368.001419 | 76.78559476 |   |
| 163.0964809     |             |  |             |             |   |
| LAPTM4B LAPTM4B | 2457.537016 |  | 5759.418002 | 1928.568427 |   |
| 1910.020059     |             |  |             |             |   |
| MUC4 MUC4       | 2.342742627 |  | 7.109138778 | 0 0         |   |
| KIAA1024        | KIAA1024    |  | 33.96976809 | 4.062365016 | 0 |

|              |              |             |             |             |             |
|--------------|--------------|-------------|-------------|-------------|-------------|
|              |              | 2.828262674 |             |             |             |
| THSD7A       | THSD7A       | 1.171371313 | 0           | 8.92855753  | 0           |
| CEP128       | CEP128       | 1820.311021 | 1292.847666 | 337.4994746 |             |
| 780.6004981  |              |             |             |             |             |
| SLTM         | SLTM         | 4837.763525 | 4320.325195 | 4783.921125 |             |
| 4824.073368  |              |             |             |             |             |
| PPP1R16A     | PPP1R16A     |             | 586.857028  | 542.3257297 |             |
| 624.1061714  | 553.3967299  |             |             |             |             |
| KIAA0100     | KIAA0100     |             | 13578.53627 | 7240.15005  |             |
| 7096.417525  | 8454.619887  |             |             |             |             |
| PARP8        | PARP8        | 2018.272773 | 1239.02133  | 4013.38661  |             |
| 4066.098971  |              |             |             |             |             |
| PGAM4        | PGAM4        | 4.685485254 | 15.23386881 | 9.821413283 |             |
| 7.542033798  |              |             |             |             |             |
| C19orf73     | C19orf73     |             | 55.05445173 | 26.40537261 |             |
| 116.0712479  | 95.2181767   |             |             |             |             |
| IKZF4        | IKZF4        | 924.2119663 | 1967.200259 | 1218.748103 |             |
| 937.0976994  |              |             |             |             |             |
| GSG2         | GSG2         | 1202.998339 | 1651.351379 | 398.2136659 |             |
| 528.8851201  |              |             |             |             |             |
| PN01         | PN01         | 2574.674147 | 3295.593619 | 3416.066111 |             |
| 3117.688221  |              |             |             |             |             |
| NXN          | NXN          | 15.22782708 | 19.29623383 | 13.3928363  |             |
| 21.68334717  |              |             |             |             |             |
| NEDD4        | NEDD4        | 941.782536  | 858.1746097 | 516.0706253 |             |
| 704.2374059  |              |             |             |             |             |
| RHBDF1       | RHBDF1       | 8.199599194 | 0           | 0           | 11.3130507  |
| CDHR3        | CDHR3        | 11.71371313 | 11.17150379 | 0           | 3.771016899 |
| TBC1D32      | TBC1D32      | 290.5000857 | 223.4300759 | 573.2133934 |             |
| 404.4415624  |              |             |             |             |             |
| ST6GALNAC3   | ST6GALNAC3   |             | 3.51411394  | 19.29623383 |             |
| 11.60712479  | 22.62610139  |             |             |             |             |
| LOC101928445 | LOC101928445 |             | 185.0766675 | 212.2585721 |             |
| 250.8924666  | 204.5776668  |             |             |             |             |
| LOC102724814 | LOC102724814 |             | 4596.461034 | 5117.564329 |             |
| 3570.530156  | 4857.069766  |             |             |             |             |
| LOC283575    | LOC283575    |             | 0           | 1.015591254 | 49.10706642 |
| 0.942754225  |              |             |             |             |             |
| MIR135B      | MIR135B      | 3.51411394  | 0           | 0           | 0           |
| MIR548H2     | MIR548H2     |             | 0           | 0           | 1.785711506 |
| PATZ1        | PATZ1        | 872.6716285 | 619.510665  | 1058.034067 | 0           |
| 911.6433353  |              |             |             |             |             |
| KIAA0020     | KIAA0020     |             | 3070.164213 | 4389.3854   |             |
| 4103.565041  | 4267.848375  |             |             |             |             |
| PRG4         | PRG4         | 379.5243056 | 347.3322089 | 708.0346122 |             |
| 587.335882   |              |             |             |             |             |
| PDE6D        | PDE6D        | 2342.742627 | 2907.63776  | 1922.318436 |             |
| 2209.815903  |              |             |             |             |             |
| PAWR         | PAWR         | 87.85284851 | 47.73278894 | 110.7141134 |             |
| 95.2181767   |              |             |             |             |             |



|             |           |             |             |             |
|-------------|-----------|-------------|-------------|-------------|
| PAPPA       | PAPPA     | 11.71371313 | 1.015591254 | 0.892855753 |
| 6.599279573 |           |             |             |             |
| NDEL1       | NDEL1     | 3023.30936  | 3336.21727  | 4225.886279 |
| 3312.838346 |           |             |             |             |
| TMEM40      | TMEM40    | 1.171371313 | 0           | 0           |
| TMEM140     | TMEM140   | 2832.375836 | 2887.325935 | 6152.668994 |
| 5735.716703 |           |             |             |             |
| CEP104      | CEP104    | 2429.424104 | 3020.36839  | 2922.31688  |
| 2931.965639 |           |             |             |             |
| ECE2        | ECE2      | 575.1433149 | 1025.747167 | 688.3917856 |
| 652.3859235 |           |             |             |             |
| KIAA0408    | KIAA0408  |             | 133.5363297 | 169.6037394 |
| 126.7855169 |           | 133.8710999 |             |             |
| ANKRD33B    | ANKRD33B  |             | 303.3851702 | 273.1940473 |
| 386.6065411 |           | 221.5472428 |             |             |
| CDK5        | CDK5      | 1584.865387 | 2316.56365  | 883.0343397 |
| 905.98681   |           |             |             |             |
| NPEPL1      | NPEPL1    | 892.5849409 | 1289.800893 | 760.7131016 |
| 897.5020219 |           |             |             |             |
| NPC1        | NPC1      | 3746.04546  | 2431.325462 | 2515.174656 |
| 2545.436407 |           |             |             |             |
| TXNL1       | TXNL1     | 3667.563582 | 4325.403151 | 3970.529534 |
| 3586.237071 |           |             |             |             |
| LINC00092   | LINC00092 |             | 17.5705697  | 31.48332888 |
| 25.89281684 |           | 29.22538097 |             |             |
| SNHG12      | SNHG12    | 185.0766675 | 104.6058992 | 359.8208685 |
| 326.1929618 |           |             |             |             |
| DBIL5P      | DBIL5P    | 56.22582305 | 24.3741901  | 24.99996108 |
| 38.65292321 |           |             |             |             |
| EFTUD2      | EFTUD2    | 15860.36758 | 21513.26953 | 13109.80102 |
| 13259.83817 |           |             |             |             |
| RNASEH2A    | RNASEH2A  |             | 3825.69871  | 4830.152004 |
| 2639.281606 |           | 3004.557714 |             |             |
| CYTH2       | CYTH2     | 1905.821127 | 2342.969023 | 3015.173878 |
| 2284.293486 |           |             |             |             |
| HLA-D0A     | HLA-D0A   | 15.22782708 | 9.140321286 | 12.49998054 |
| 6.599279573 |           |             |             |             |
| KLHL11      | KLHL11    | 338.5263096 | 238.6639447 | 246.4281878 |
| 354.4755885 |           |             |             |             |
| IHH         | IHH       | 0           | 4.062365016 | 0           |
| TRIP11      | TRIP11    | 2137.752647 | 2208.910978 | 2800.888497 |
| 3333.578939 |           |             |             |             |
| DPYSL4      | DPYSL4    | 12.88508445 | 14.21827756 | 80.35701777 |
| 34.88190631 |           |             |             |             |
| HSPB1       | HSPB1     | 1072.976123 | 1087.698233 | 2123.210981 |
| 1604.56769  |           |             |             |             |
| FGF11       | FGF11     | 11.71371313 | 14.21827756 | 7.142846024 |
| 2.828262674 |           |             |             |             |
| NLRP1       | NLRP1     | 5715.120638 | 3611.442499 | 4683.028425 |
| 5252.083786 |           |             |             |             |

|             |             |             |             |             |             |
|-------------|-------------|-------------|-------------|-------------|-------------|
| MAML3       | MAML3       | 14.05645576 | 30.46773762 | 36.60708587 |             |
| 115.9587696 |             |             |             |             |             |
| CTAGE6      | CTAGE6      | 0           | 1.015591254 | 0           | 4.713771124 |
| GBE1        | GBE1        | 1505.212138 | 1749.863731 | 1228.569516 |             |
| 1487.666167 |             |             |             |             |             |
| IL23R       | IL23R       | 624.3409101 | 74.13816155 | 158.0354683 |             |
| 859.7918529 |             |             |             |             |             |
| MRPL30      | MRPL30      | 1761.742455 | 2022.042187 | 1322.31937  |             |
| 1463.154557 |             |             |             |             |             |
| ERGIC1      | ERGIC1      | 563.4296018 | 381.8623115 | 425.8921942 |             |
| 526.9996116 |             |             |             |             |             |
| ZNF442      | ZNF442      | 24.59879758 | 21.32741634 | 602.6776333 |             |
| 241.3450815 |             |             |             |             |             |
| PGAP1       | PGAP1       | 501.3469222 | 362.5660777 | 804.4630335 |             |
| 438.3807145 |             |             |             |             |             |
| CCDC130     | CCDC130     | 1550.895619 | 1761.035235 | 3032.138137 |             |
| 2430.420391 |             |             |             |             |             |
| NOL9        | NOL9        | 2527.819294 | 3030.524302 | 2216.067979 |             |
| 2340.85874  |             |             |             |             |             |
| SDCBP2-AS1  | SDCBP2-AS1  |             | 323.2984825 | 179.759652  |             |
| 289.285264  | 420.4683842 |             |             |             |             |
| PCOLCE-AS1  | PCOLCE-AS1  |             | 25.7701689  | 34.53010264 |             |
| 36.60708587 | 31.11088942 |             |             |             |             |
| LRP4-AS1    | LRP4-AS1    |             | 3.51411394  | 12.18709505 |             |
| 3.571423012 | 3.771016899 |             |             |             |             |
| SORD        | SORD        | 719.2219865 | 625.6042125 | 416.0707809 |             |
| 646.7293982 |             |             |             |             |             |
| XIST        | XIST        | 0           | 636.7757163 | 1530.354761 | 0           |
| NSMCE4A     | NSMCE4A     | 3312.638074 | 4218.766069 | 3549.101618 |             |
| 3257.215846 |             |             |             |             |             |
| METTL1      | METTL1      | 907.8127679 | 1487.841187 | 1319.640803 |             |
| 1297.229813 |             |             |             |             |             |
| BHMT2       | BHMT2       | 0           | 0           | 1.785711506 | 0           |
| VEZT        | VEZT        | 2439.966446 | 2122.585721 | 2226.782248 |             |
| 2802.80831  |             |             |             |             |             |
| RNF111      | RNF111      | 3088.906154 | 2324.688381 | 3134.816549 |             |
| 2650.082126 |             |             |             |             |             |
| AMN1        | AMN1        | 292.8428284 | 301.6306025 | 408.0350791 |             |
| 488.3466884 |             |             |             |             |             |
| TMEM169     | TMEM169     | 149.9355281 | 264.0537261 | 124.1069497 |             |
| 148.0124133 |             |             |             |             |             |
| PROSER2     | PROSER2     | 30.45565415 | 46.71719769 | 188.3925639 |             |
| 98.04643937 |             |             |             |             |             |
| MCM9        | MCM9        | 2620.357628 | 1892.046506 | 1479.461983 |             |
| 2036.349125 |             |             |             |             |             |
| RGPD3       | RGPD3       | 25.7701689  | 18.28064257 | 25.89281684 |             |
| 32.99639787 |             |             |             |             |             |
| AKAP6       | AKAP6       | 21.08468364 | 4.062365016 | 26.78567259 | 0           |
| C6orf120    | C6orf120    |             | 1853.109418 | 1866.656725 |             |
| 1968.746935 | 1842.141755 |             |             |             |             |

|               |               |             |             |             |
|---------------|---------------|-------------|-------------|-------------|
| CDC20B        | CDC20B        | 2.342742627 | 3.046773762 | 11.60712479 |
| 1.885508449   |               |             |             |             |
| ZSCAN12       | ZSCAN12       | 322.1271112 | 234.6015797 | 818.7487255 |
| 580.7366024   |               |             |             |             |
| DCP1A         | DCP1A         | 3440.317548 | 4811.871362 | 6607.132572 |
| 5239.827981   |               |             |             |             |
| IL26          | IL26          | 297.5283136 | 58.90429273 | 25.89281684 |
| 198.9211414   |               |             |             |             |
| RPS27A        | RPS27A        | 22258.3977  | 22379.56887 | 26837.45822 |
| 24240.09663   |               |             |             |             |
| ZMYM5         | ZMYM5         | 1027.292642 | 1069.417591 | 1730.354449 |
| 1179.385535   |               |             |             |             |
| TRIM38        | TRIM38        | 3849.126136 | 4636.174075 | 5907.133662 |
| 5197.404041   |               |             |             |             |
| FST           | FST           | 7.028227881 | 2.031182508 | 56.24991244 |
| 28.28262674   |               |             |             |             |
| RABGGTA       | RABGGTA       | 2498.535012 | 3340.279635 | 2354.460621 |
| 2373.855138   |               |             |             |             |
| MDGA2         | MDGA2         | 0           | 0           | 0.942754225 |
| LRR58         | LRR58         | 5002.92688  | 3120.911924 | 2894.638351 |
| 3801.185034   |               |             |             |             |
| C1QBP         | C1QBP         | 13564.47981 | 19539.97573 | 13318.72927 |
| 14314.78015   |               |             |             |             |
| TAF4          | TAF4          | 217.8750643 | 110.6994467 | 151.785478  |
| 174.4095316   |               |             |             |             |
| BUB1B         | BUB1B         | 5825.229542 | 6193.075467 | 2228.56796  |
| 3453.308725   |               |             |             |             |
| BCL2L2-PABPN1 | BCL2L2-PABPN1 | 5549.991361 | 7795.476091 | 5299.355164 |
| 5457.604207   |               |             |             |             |
| IP6K1         | IP6K1         | 3925.265271 | 3099.584507 | 4410.70742  |
| 3648.45885    |               |             |             |             |
| OR2A20P       | OR2A20P       | 0           | 4.062365016 | 3.571423012 |
| PAX5          | PAX5          | 1.171371313 | 10.15591254 | 0.892855753 |
| 9.427542247   |               |             |             |             |
| RSF1          | RSF1          | 958.1817344 | 871.377296  | 2207.139421 |
| 1668.674978   |               |             |             |             |
| ZSWIM3        | ZSWIM3        | 439.2642425 | 471.2343419 | 720.5345927 |
| 591.1068989   |               |             |             |             |
| TMC2          | TMC2          | 0           | 2.031182508 | 0           |
| ZNF280D       | ZNF280D       | 604.4275977 | 360.5348952 | 680.3560838 |
| 613.7330003   |               |             |             |             |
| ST8SIA6       | ST8SIA6       | 56.22582305 | 160.4634181 | 8.92855753  |
| 12.25580492   |               |             |             |             |
| SAR1B         | SAR1B         | 4699.54171  | 5071.862723 | 4374.99319  |
| 3899.231473   |               |             |             |             |
| TEN1          | TEN1          | 579.8288002 | 1072.464364 | 577.6776722 |
| 304.5096146   |               |             |             |             |
| REC8          | REC8          | 461.5202975 | 358.5037127 | 467.8564146 |
| 341.2770293   |               |             |             |             |
| FXVD4         | FXVD4         | 1.171371313 | 0           | 0           |
|               |               |             |             | 7.542033798 |

|                           |             |             |             |  |
|---------------------------|-------------|-------------|-------------|--|
| TLDC2 TLDC2               | 2789.035097 | 3767.843553 | 2135.710961 |  |
| 2126.853531               |             |             |             |  |
| CDC6 CDC6                 | 4768.652617 | 6339.320608 | 2575.888847 |  |
| 3220.448432               |             |             |             |  |
| MPHOSPH8 MPHOSPH8         | 3070.530935 | 1795.712224 | 1830.09544  |  |
| 3006.443223               |             |             |             |  |
| MARK4 MARK4               | 94.88107639 | 57.88870148 | 40.17850889 |  |
| 30.16813519               |             |             |             |  |
| STK31 STK31               | 0 0         | 6.249990271 | 13.19855915 |  |
| SEPSECS SEPSECS           | 1113.974119 | 802.3170907 | 615.1776138 |  |
| 930.4984198               |             |             |             |  |
| RAB8B RAB8B               | 8904.764725 | 6697.82432  | 8518.73674  |  |
| 9698.11271                |             |             |             |  |
| CNPY4 CNPY4               | 828.1595186 | 703.8047391 | 470.5349818 |  |
| 907.8723184               |             |             |             |  |
| EGLN3 EGLN3               | 288.1573431 | 123.902133  | 172.3211603 |  |
| 300.7385977               |             |             |             |  |
| DIAPH2 DIAPH2             | 616.1413109 | 581.9337886 | 397.3208101 |  |
| 631.6453306               |             |             |             |  |
| CGB2 CGB2                 | 1.171371313 | 0 0         | 0           |  |
| PARP16 PARP16             | 1095.232178 | 1226.834235 | 1940.175551 |  |
| 1523.490827               |             |             |             |  |
| FNDC4 FNDC4               | 5.856856567 | 4.062365016 | 0 0         |  |
| WHSC1L1 WHSC1L1           | 7581.115141 | 8738.14715  | 7760.702205 |  |
| 6948.098636               |             |             |             |  |
| STPG1 STPG1               | 475.5767533 | 570.7622848 | 437.499319  |  |
| 427.0676638               |             |             |             |  |
| USH2A USH2A               | 0 0         | 4.464278765 | 0.942754225 |  |
| MT1L MT1L                 | 332.669453  | 211.2429808 | 114.2855364 |  |
| 185.7225823               |             |             |             |  |
| SLC04A1-AS1 SLC04A1-AS1   | 553.5705669 | 811.7603202 | 1687.912664 |  |
| 532.656137                |             |             |             |  |
| DDX6 DDX6                 | 6225.838531 | 5670.045971 | 7176.774543 |  |
| 6628.504954               |             |             |             |  |
| TDRP TDRP                 | 0 0         | 13.3928363  | 0           |  |
| NMB NMB                   | 213.1895791 | 166.5569657 | 226.7853613 |  |
| 186.6653365               |             |             |             |  |
| TMEM43 TMEM43             | 4263.791581 | 6144.327087 | 6521.41842  |  |
| 5406.695479               |             |             |             |  |
| RPS6KA2 RPS6KA2           | 209.6754651 | 233.5859884 | 1294.640842 |  |
| 677.8402876               |             |             |             |  |
| ERLIN1 ERLIN1             | 1776.970283 | 2128.679268 | 2338.389217 |  |
| 2510.5545                 |             |             |             |  |
| LOC101929380 LOC101929380 | 0 0         | 5.357134518 | 0           |  |
| RASSF8-AS1 RASSF8-AS1     | 3.51411394  | 1.015591254 | 0           |  |
| 0                         |             |             |             |  |
| TVP23C-CDRT4 TVP23C-CDRT4 | 459.8207128 | 363.1251072 | 453.9692906 |  |
| 346.9335547               |             |             |             |  |
| PET100 PET100             | 2882.744802 | 2880.216796 | 2669.638702 |  |
| 2096.685396               |             |             |             |  |

|             |         |             |             |             |
|-------------|---------|-------------|-------------|-------------|
| CCNB3       | CCNB3   | 35.1411394  | 47.73278894 | 107.1426904 |
| 41.48118589 |         |             |             |             |
| C8orf33     | C8orf33 | 2593.416088 | 3820.654298 | 3799.101229 |
| 2988.530892 |         |             |             |             |
| ANKRD36     | ANKRD36 | 1919.877583 | 1505.106239 | 1774.997237 |
| 2358.77107  |         |             |             |             |
| MY01B       | MY01B   | 63.25405093 | 107.6526729 | 520.534904  |
| 268.684954  |         |             |             |             |
| BCAR3       | BCAR3   | 18.74194102 | 85.30966534 | 52.67848943 |
| 56.56525348 |         |             |             |             |
| UNC13D      | UNC13D  | 10011.71062 | 10630.19366 | 3700.887096 |
| 5862.045769 |         |             |             |             |
| MOB3B       | MOB3B   | 16.39919839 | 18.28064257 | 72.321316   |
| 16.96957604 |         |             |             |             |
| MY018B      | MY018B  | 121.8226166 | 56.87311023 | 6.249990271 |
| 20.74059294 |         |             |             |             |
| PAQR6       | PAQR6   | 58.56856567 | 30.46773762 | 38.39279738 |
| 26.39711829 |         |             |             |             |
| ITGBL1      | ITGBL1  | 0           | 1.015591254 | 0           |
| ZNF416      | ZNF416  | 427.5505294 | 543.3413209 | 742.8559865 |
| 817.3679128 |         |             |             |             |
| C2orf42     | C2orf42 | 1521.611336 | 1659.476109 | 1808.0329   |
| 1922.275864 |         |             |             |             |
| HRASLS2     | HRASLS2 | 15.22782708 | 11.17150379 | 8.035701777 |
| 6.599279573 |         |             |             |             |
| IMPA2       | IMPA2   | 598.5707412 | 824.6600983 | 511.6063465 |
| 486.46118   |         |             |             |             |
| SLC5A4      | SLC5A4  | 0           | 0           | 2.678567259 |
| IQGAP3      | IQGAP3  | 373.667449  | 171.6349219 | 87.4998638  |
| 165.9247436 |         |             |             |             |
| GFRA1       | GFRA1   | 4.685485254 | 0           | 2.678567259 |
| SOX13       | SOX13   | 1.171371313 | 0           | 27.67852834 |
| ITPKB       | ITPKB   | 2115.496592 | 1858.531995 | 3603.565819 |
| 4469.597779 |         |             |             |             |
| CDC34       | CDC34   | 2976.454508 | 4219.781661 | 2790.174228 |
| 2434.191408 |         |             |             |             |
| GNPNAT1     | GNPNAT1 | 2190.464356 | 2133.757225 | 1177.676738 |
| 1663.961207 |         |             |             |             |
| KCNG3       | KCNG3   | 4.685485254 | 3.046773762 | 0           |
| TRIM44      | TRIM44  | 2047.557056 | 2339.922249 | 0.942754225 |
| 6389.045381 |         |             |             |             |
| CBLN3       | CBLN3   | 90.19559114 | 8.124730032 | 35.71423012 |
| 62.22177883 |         |             |             |             |
| POLR2I      | POLR2I  | 2376.712395 | 3128.021062 | 3008.923888 |
| 2239.041284 |         |             |             |             |
| HAPLN3      | HAPLN3  | 4330.559746 | 5093.190139 | 7008.917661 |
| 5352.015734 |         |             |             |             |
| HOXA3       | HOXA3   | 1.171371313 | 0           | 0.892855753 |
| BBS5        | BBS5    | 106.5947895 | 134.0580455 | 180.3568621 |
| 151.7834302 |         |             |             |             |

|               |               |             |             |             |
|---------------|---------------|-------------|-------------|-------------|
| B3GNT8        | B3GNT8        | 132.3649584 | 70.07579653 | 47.32135491 |
| 103.7029647   |               |             |             |             |
| DRAXIN        | DRAXIN        | 3.51411394  | 2.031182508 | 27.67852834 |
| 7.542033798   |               |             |             |             |
| RCOR2         | RCOR2         | 0           | 3.571423012 | 0           |
| AP2M1         | AP2M1         | 18952.78785 | 25740.16033 | 16761.58105 |
| 16134.2958    |               |             |             |             |
| C12orf43      | C12orf43      |             | 1466.556884 | 1943.84166  |
| 1581.247539   | 1402.818286   |             |             |             |
| SRRM2-AS1     | SRRM2-AS1     |             | 48.02622385 | 51.79515396 |
| 33.92851862   | 38.65292321   |             |             |             |
| LINC00310     | LINC00310     |             | 8.199599194 | 7.109138778 |
| 6.249990271   | 7.542033798   |             |             |             |
| NPIP6         | NPIP6         | 0           | 6.093547524 | 15.1785478  |
| PTK2          | PTK2          | 69.11090749 | 73.12257029 | 0.942754225 |
| 724.0352446   |               |             |             |             |
| ULK2          | ULK2          | 1116.316862 | 1032.856305 | 1050.891221 |
| 1021.002825   |               |             |             |             |
| CCT6B         | CCT6B         | 57.39719436 | 40.62365016 | 98.21413283 |
| 76.3630922    |               |             |             |             |
| GIMAP1-GIMAP5 | GIMAP1-GIMAP5 |             | 9758.694412 | 11092.28768 |
| 15224.9763    | 14377.00193   |             |             |             |
| PDXK          | PDXK          | 5856.856567 | 6952.737725 | 4220.529145 |
| 3917.143804   |               |             |             |             |
| ARF4          | ARF4          | 7817.732146 | 9186.022893 | 9817.84186  |
| 8572.464165   |               |             |             |             |
| MAPKAPK5      | MAPKAPK5      |             | 2582.873746 | 3373.794146 |
| 2923.209735   | 2799.980047   |             |             |             |
| BLZF1         | BLZF1         | 1844.909819 | 2168.287327 | 1234.819506 |
| 1397.161761   |               |             |             |             |
| PARP3         | PARP3         | 613.7985683 | 529.1230434 | 835.7129848 |
| 917.2998606   |               |             |             |             |
| SMYD2         | SMYD2         | 1153.800744 | 1921.498653 | 1380.354994 |
| 1453.727015   |               |             |             |             |
| ROS1          | ROS1          | 0           | 0           | 0.942754225 |
| CRYAB         | CRYAB         | 0           | 7.142846024 | 0           |
| RUNDC3B       | RUNDC3B       | 7.028227881 | 7.109138778 | 71.42846024 |
| 10.37029647   |               |             |             |             |
| GATS          | GATS          | 624.3409101 | 420.4547792 | 630.3561616 |
| 686.3250756   |               |             |             |             |
| PRSS54        | PRSS54        | 5.856856567 | 20.31182508 | 11.60712479 |
| 0.942754225   |               |             |             |             |
| SOCS2         | SOCS2         | 495.4900656 | 2159.147006 | 1252.676622 |
| 548.6829588   |               |             |             |             |
| RACGAP1       | RACGAP1       | 12388.42301 | 6743.525927 | 4544.635783 |
| 4392.291933   |               |             |             |             |
| GTF2H1        | GTF2H1        | 4423.09808  | 5550.206203 | 5412.491575 |
| 4792.019724   |               |             |             |             |
| NRXN1         | NRXN1         | 1.171371313 | 0           | 0.892855753 |
| CHORDC1       | CHORDC1       | 5199.71726  | 5287.168069 | 0           |
|               |               |             |             | 5349.991672 |

|             |            |             |             |             |             |
|-------------|------------|-------------|-------------|-------------|-------------|
| 5803.595007 |            |             |             |             |             |
| TBL1X       | TBL1X      | 3186.129973 | 2385.623856 | 2973.209658 |             |
| 3124.287501 |            |             |             |             |             |
| ELP2        | ELP2       | 3683.962781 | 4271.576815 | 4725.885501 |             |
| 4742.05375  |            |             |             |             |             |
| DPP3        | DPP3       | 9657.956479 | 10519.49421 | 4022.315167 |             |
| 5051.277136 |            |             |             |             |             |
| ESPMP       | ESPMP      | 0           | 0           | 10.71426904 | 7.542033798 |
| FBXL19-AS1  | FBXL19-AS1 |             |             | 173.3629544 | 160.4634181 |
| 243.7496206 |            | 273.3987252 |             |             |             |
| HNF1A-AS1   | HNF1A-AS1  |             | 0           | 0           | 0.892855753 |
| MIR4697HG   | MIR4697HG  |             | 37.48388203 | 8.124730032 | 0           |
| 31.11088942 |            |             |             |             |             |
| LRR37BP1    | LRR37BP1   |             | 134.707701  | 48.74838019 |             |
| 149.9997665 |            | 161.2109724 |             |             |             |
| MIR4650-1   | MIR4650-1  |             | 1.171371313 | 3.046773762 | 0           |
| 1.885508449 |            |             |             |             |             |
| MIR4658     | MIR4658    | 80.82462063 | 38.59246765 | 30.3570956  |             |
| 46.19495701 |            |             |             |             |             |
| MIR4649     | MIR4649    | 0           | 0           | 0.892855753 | 0           |
| ADRBK1      | ADRBK1     | 20140.55836 | 26713.09676 | 13317.83641 |             |
| 17572.93875 |            |             |             |             |             |
| C15orf53    | C15orf53   |             | 619.6554248 | 610.3703437 |             |
| 125.8926612 |            | 117.8442781 |             |             |             |
| KLRC1       | KLRC1      | 0           | 17.26505132 | 41.96422039 | 0           |
| SPG7        | SPG7       | 3678.105924 | 4075.567703 | 2782.138526 |             |
| 3022.470044 |            |             |             |             |             |
| SPI1        | SPI1       | 2.342742627 | 0           | 17.85711506 | 6.599279573 |
| SPARC       | SPARC      | 5.856856567 | 16.24946006 | 50.89277792 |             |
| 7.542033798 |            |             |             |             |             |
| OSBPL6      | OSBPL6     | 56.22582305 | 40.62365016 | 116.9641036 |             |
| 20.74059294 |            |             |             |             |             |
| OMG         | OMG        | 8.199599194 | 5.07795627  | 0           | 16.02682182 |
| REST        | REST       | 6142.671168 | 5361.30623  | 6396.418615 |             |
| 6933.957323 |            |             |             |             |             |
| IGFBP5      | IGFBP5     | 0           | 1.015591254 | 0           | 0           |
| ASB5        | ASB5       | 0           | 0           | 0.892855753 | 0           |
| KLHDC1      | KLHDC1     | 42.16936728 | 41.63924142 | 134.8212187 |             |
| 133.8710999 |            |             |             |             |             |
| FDFT1       | FDFT1      | 9708.325446 | 14271.0883  | 13177.65806 |             |
| 13549.26372 |            |             |             |             |             |
| ZNF726      | ZNF726     | 190.9335241 | 98.51235164 | 151.785478  |             |
| 175.3522858 |            |             |             |             |             |
| CRISPLD2    | CRISPLD2   |             | 4.685485254 | 2.031182508 |             |
| 33.03566286 |            | 1.885508449 |             |             |             |
| C10orf113   | C10orf113  |             | 2.342742627 | 0           | 0           |
| LTF         | LTF        | 0           | 10.15591254 | 8.92855753  | 1.885508449 |
| SIT1        | SIT1       | 7964.15356  | 10007.63622 | 2706.245787 |             |
| 3637.145799 |            |             |             |             |             |
| ATL3        | ATL3       | 3265.783222 | 2827.406051 | 3023.20958  |             |

|             |            |             |             |             |               |
|-------------|------------|-------------|-------------|-------------|---------------|
| 3554.183427 |            |             |             |             |               |
| AJAP1       | AJAP1      | 0           | 0           | 0           | 3.771016899   |
| ZNF534      | ZNF534     | 1.171371313 |             | 2.031182508 | 0 0           |
| BRD4        | BRD4       | 3507.085713 |             | 2702.488327 | 3366.066189   |
| 2905.568521 |            |             |             |             |               |
| C19orf24    | C19orf24   |             |             | 1602.435957 | 2384.608265   |
| 1823.211448 |            |             |             |             | 1366.993626   |
| ADAM28      | ADAM28     | 3.51411394  |             | 0           | 8.035701777 0 |
| PLK4        | PLK4       | 4614.031604 |             | 3903.932781 | 1215.17668    |
| 2313.518867 |            |             |             |             |               |
| TINF2       | TINF2      | 6812.695559 |             | 7997.781126 | 9022.307384   |
| 8173.679128 |            |             |             |             |               |
| HIST1H2BD   | HIST1H2BD  |             |             | 117.1371313 | 208.1962071   |
| 187.4997081 |            |             |             |             | 193.2646161   |
| IGDCC4      | IGDCC4     | 3.51411394  |             | 1.015591254 | 0.892855753 0 |
| PPT2-EGFL8  | PPT2-EGFL8 |             |             | 0 0         | 0 1.885508449 |
| NFAM1       | NFAM1      | 5.856856567 |             | 16.24946006 | 0 2.828262674 |
| GJC1        | GJC1       | 60.9113083  |             | 15.23386881 | 70.53560449   |
| 21.68334717 |            |             |             |             |               |
| TUB         | TUB        | 1.171371313 |             | 6.093547524 | 46.42849916   |
| 19.79783872 |            |             |             |             |               |
| PHF14       | PHF14      | 777.7905521 |             | 538.2633646 | 479.4635394   |
| 656.1569404 |            |             |             |             |               |
| SAMD9       | SAMD9      | 5694.035955 |             | 4852.495012 | 6899.989259   |
| 7367.624266 |            |             |             |             |               |
| TAS2R5      | TAS2R5     | 11.71371313 |             | 6.093547524 | 8.92855753    |
| 23.56885562 |            |             |             |             |               |
| FREM3       | FREM3      | 0           | 0           | 43.7499319  | 0             |
| KLRF2       | KLRF2      | 0           | 3.046773762 | 0           | 0             |
| ORC3        | ORC3       | 3088.906154 |             | 3555.58498  | 4319.636133   |
| 4477.139813 |            |             |             |             |               |
| ARHGAP33    | ARHGAP33   |             |             | 124.1653592 | 37.5768764    |
| 40.17850889 |            |             |             |             | 31.11088942   |
| TTLL12      | TTLL12     | 5752.60452  |             | 7836.302116 | 5498.205727   |
| 4706.22909  |            |             |             |             |               |
| CYP19A1     | CYP19A1    | 0           | 10.15591254 | 0           | 0             |
| EFR3A       | EFR3A      | 6919.290349 |             | 5895.50723  | 5483.027179   |
| 6914.159484 |            |             |             |             |               |
| LSM8        | LSM8       | 2837.061321 |             | 2322.657198 | 2002.675454   |
| 2499.24145  |            |             |             |             |               |
| COR02B      | COR02B     | 0           | 5.07795627  | 7.142846024 | 0             |
| EGR3        | EGR3       | 204.9899799 |             | 100.5435342 | 116.9641036   |
| 490.2321969 |            |             |             |             |               |
| LOC285847   | LOC285847  |             |             | 1.171371313 | 2.031182508   |
| 10.71426904 |            |             |             |             | 9.427542247   |
| ARPC3       | ARPC3      | 26123.92303 |             | 30088.92208 | 13929.4426    |
| 16414.29381 |            |             |             |             |               |
| SMARCD3     | SMARCD3    | 63.25405093 |             | 33.51451138 | 281.2495622   |
| 231.9175393 |            |             |             |             |               |
| COX19       | COX19      | 1302.564901 |             | 1656.429335 | 2471.424724   |



|             |             |             |             |             |             |
|-------------|-------------|-------------|-------------|-------------|-------------|
| 1824.229425 |             |             |             |             |             |
| MKI67       | MKI67       | 27340.97783 | 13031.05138 | 4064.279388 |             |
| 11297.02387 |             |             |             |             |             |
| PTPLA       | PTPLA       | 168.6774691 | 276.2408211 | 96.42842133 |             |
| 159.325464  |             |             |             |             |             |
| SSU72       | SSU72       | 7577.601027 | 10267.62758 | 9178.557141 |             |
| 7747.554219 |             |             |             |             |             |
| DNAJC28     | DNAJC28     | 25.7701689  | 26.40537261 | 69.64274874 |             |
| 57.50800771 |             |             |             |             |             |
| SDCBP       | SDCBP       | 12414.19318 | 12503.95952 | 12193.73102 |             |
| 13193.84537 |             |             |             |             |             |
| URM1        | URM1        | 4228.650442 | 4620.940206 | 2452.674754 |             |
| 2865.972843 |             |             |             |             |             |
| WDR26       | WDR26       | 1172.542685 | 519.9827221 | 614.2847581 |             |
| 867.3338867 |             |             |             |             |             |
| NRGN        | NRGN        | 44.51210991 | 40.62365016 | 21.42853807 |             |
| 48.08046546 |             |             |             |             |             |
| ZDHC3       | ZDHC3       | 4339.930716 | 4878.900384 | 2658.924433 |             |
| 2785.838734 |             |             |             |             |             |
| ANP32A-IT1  | ANP32A-IT1  |             | 38.65525334 | 29.45214637 |             |
| 23.21424958 | 21.68334717 |             |             |             |             |
| LINC00520   | LINC00520   |             | 0           | 1.015591254 | 0           |
| LINC00271   | LINC00271   |             | 79.65324932 | 62.96665775 |             |
| 18.74997081 | 40.53843166 |             |             |             |             |
| LINC00202-1 | LINC00202-1 |             | 0           | 1.015591254 | 2.678567259 |
| 0           |             |             |             |             |             |
| KLF3-AS1    | KLF3-AS1    |             | 417.0081876 | 376.7843553 |             |
| 395.5350986 | 271.5132167 |             |             |             |             |
| LINC00264   | LINC00264   |             | 1.171371313 | 2.031182508 | 0           |
| 1.885508449 |             |             |             |             |             |
| LOC284798   | LOC284798   |             | 0           | 0           | 8.035701777 |
| 11.3130507  |             |             |             |             |             |
| H1FX-AS1    | H1FX-AS1    |             | 310.4133981 | 152.3386881 |             |
| 174.9997276 | 182.8943196 |             |             |             |             |
| LINC00486   | LINC00486   |             | 0           | 0           | 0.892855753 |
| 4.713771124 |             |             |             |             |             |
| KLF14       | KLF14       | 0           | 0           | 0           | 3.771016899 |
| TMC1        | TMC1        | 2.342742627 | 2.031182508 | 0           | 1.885508449 |
| SEPN1       | SEPN1       | 301.0424276 | 224.4456671 | 502.677789  |             |
| 631.6453306 |             |             |             |             |             |
| CNOT7       | CNOT7       | 8548.667846 | 9042.824526 | 8301.772792 |             |
| 8955.222381 |             |             |             |             |             |
| MPI         | MPI         | 2275.974462 | 3144.270523 | 2399.103408 |             |
| 2663.280685 |             |             |             |             |             |
| EFNA3       | EFNA3       | 49.19759517 | 23.35859884 | 70.53560449 |             |
| 59.39351616 |             |             |             |             |             |
| ITPR3       | ITPR3       | 3282.18242  | 909.9697636 | 1617.854624 |             |
| 1940.188194 |             |             |             |             |             |
| COX6A1      | COX6A1      | 16681.49888 | 22743.15054 | 15257.11911 |             |
| 14140.37062 |             |             |             |             |             |

|             |             |             |             |             |
|-------------|-------------|-------------|-------------|-------------|
| TMPPE       | TMPPE       | 367.8105924 | 296.5526462 | 224.9996498 |
| 232.8602935 |             |             |             |             |
| CASR        | CASR        | 15.22782708 | 31.48332888 | 23.21424958 |
| 55.62249926 |             |             |             |             |
| ANKRD50     | ANKRD50     | 14.05645576 | 33.51451138 | 20.53568232 |
| 40.53843166 |             |             |             |             |
| PCDHGA1     | PCDHGA1     | 0           | 15.23386881 | 9.821413283 |
| 16.96957604 |             |             |             |             |
| EIF4H       | EIF4H       | 21321.30065 | 27046.21069 | 19786.57634 |
| 19187.87674 |             |             |             |             |
| ZFP91       | ZFP91       | 3115.847694 | 2534.91577  | 1772.31867  |
| 1884.565695 |             |             |             |             |
| ROB03       | ROB03       | 44.51210991 | 25.38978135 | 238.3924861 |
| 127.2718203 |             |             |             |             |
| RNF157      | RNF157      | 2855.803262 | 3133.099019 | 2140.17524  |
| 1976.012855 |             |             |             |             |
| MRPS30      | MRPS30      | 2561.789063 | 3115.833967 | 2905.35262  |
| 2700.0481   |             |             |             |             |
| TNFRSF12A   | TNFRSF12A   |             | 154.6210134 | 239.679536  |
| 224.106794  | 143.2986422 |             |             |             |
| FLT3LG      | FLT3LG      | 1847.252561 | 4166.970915 | 2511.603233 |
| 1473.524853 |             |             |             |             |
| NDUFAB1     | NDUFAB1     | 8153.915713 | 9243.911594 | 5094.634927 |
| 5815.850812 |             |             |             |             |
| NDUFA9      | NDUFA9      | 9963.684392 | 14690.52749 | 7991.951845 |
| 7620.282398 |             |             |             |             |
| FYB         | FYB         | 10264.72682 | 6600.32756  | 10316.05537 |
| 12633.84937 |             |             |             |             |
| BMP8B       | BMP8B       | 86.6814772  | 104.6058992 | 163.3926028 |
| 119.7297865 |             |             |             |             |
| BICD1       | BICD1       | 364.2964785 | 469.2031594 | 464.2849916 |
| 367.6741476 |             |             |             |             |
| PVALB       | PVALB       | 0           | 2.031182508 | 0           |
| 2.828262674 |             |             |             |             |
| MAPK13      | MAPK13      | 1304.907643 | 2637.490487 | 2493.746118 |
| 1978.841118 |             |             |             |             |
| ATG4C       | ATG4C       | 890.2421982 | 1041.996627 | 1464.283435 |
| 1057.77024  |             |             |             |             |
| MCEE        | MCEE        | 544.6876608 | 503.733262  | 507.1420677 |
| 457.235799  |             |             |             |             |
| JPH3        | JPH3        | 4.685485254 | 1.015591254 | 0           |
| 10.37029647 |             |             |             |             |
| SOSTDC1     | SOSTDC1     | 2.342742627 | 0           | 0           |
| 3.771016899 |             |             |             |             |
| WWC2        | WWC2        | 1.171371313 | 0           | 291.9638312 |
| 224.3755055 |             |             |             |             |
| TMTC2       | TMTC2       | 7.028227881 | 1.015591254 | 20.53568232 |
| 0           |             |             |             |             |
| USP54       | USP54       | 297.5283136 | 327.0203838 | 372.320849  |
| 455.3502905 |             |             |             |             |
| TNFAIP8L1   | TNFAIP8L1   |             | 1350.591124 | 2140.866364 |
| 1449.997743 | 1293.458796 |             |             |             |
| WDR76       | WDR76       | 4493.380358 | 3331.139313 | 2176.782326 |
| 2501.126958 |             |             |             |             |
| GALM        | GALM        | 14016.62914 | 17771.83135 | 5510.705708 |
| 9760.334488 |             |             |             |             |

|                           |                         |             |             |
|---------------------------|-------------------------|-------------|-------------|
| LRR37B LRR37B             | 431.0646434             | 363.581669  | 367.8565702 |
| 498.7169849               |                         |             |             |
| SLC2A13 SLC2A13           | 158.1351273             | 88.3564391  | 381.2494065 |
| 362.0176223               |                         |             |             |
| MSC MSC                   | 1486.470197             | 384.9090853 | 405.3565119 |
| 1160.530451               |                         |             |             |
| POLR3G POLR3G             | 559.9154878             | 458.0316556 | 180.3568621 |
| 406.3270709               |                         |             |             |
| IGF2BP1 IGF2BP1           | 0 0                     | 1.785711506 | 0           |
| CCBL2 CCBL2               | 1844.909819             | 1990.558858 | 1527.676193 |
| 2085.372345               |                         |             |             |
| SLC44A2 SLC44A2           | 14351.64133             | 15706.11874 | 13749.08574 |
| 11554.39578               |                         |             |             |
| ECT2L ECT2L               | 8.199599194             | 6.093547524 | 25.89281684 |
| 9.427542247               |                         |             |             |
| ZNF384 ZNF384             | 4055.287487             | 3251.923195 | 3915.172477 |
| 3396.743472               |                         |             |             |
| GS1-259H13.2 GS1-259H13.2 | 74.99988325 42.42394011 | 40.99799597 | 42.65483267 |
| CCDC149 CCDC149           | 2.342742627             | 0 0         | 3.771016899 |
| ABHD14B ABHD14B           | 2660.184253             | 2629.365757 | 2351.782053 |
| 2888.598945               |                         |             |             |
| CEP170B CEP170B           | 46.85485254             | 5.07795627  | 8.92855753  |
| 16.96957604               |                         |             |             |
| MCC MCC                   | 424.0364155             | 387.955859  | 340.1780419 |
| 279.9980047               |                         |             |             |
| MC1R MC1R                 | 18.74194102             | 18.28064257 | 17.85711506 |
| 5.656525348               |                         |             |             |
| NRP1 NRP1                 | 32.79839678             | 100.5435342 | 26.78567259 |
| 9.427542247               |                         |             |             |
| COX20 COX20               | 2532.50478              | 2494.29212  | 2076.782482 |
| 2307.862342               |                         |             |             |
| SLC25A32 SLC25A32         | 4085.707926 4599.697862 | 4499.237215 | 4605.706337 |
| TCEAL1 TCEAL1             | 146.4214142             | 205.1494333 | 469.6421261 |
| 422.3538927               |                         |             |             |
| ACOX3 ACOX3               | 1454.843171             | 1837.204579 | 1224.105237 |
| 1410.36032                |                         |             |             |
| SLC8B1 SLC8B1             | 1794.540852             | 2256.643767 | 3241.959239 |
| 2923.480851               |                         |             |             |
| NRSN2 NRSN2               | 347.8972801             | 477.3278894 | 311.6066578 |
| 233.8030477               |                         |             |             |
| MRPL37 MRPL37             | 9359.256795             | 14803.25812 | 6917.846374 |
| 6653.016564               |                         |             |             |
| RBM3 RBM3                 | 13039.70546             | 15265.35214 | 9747.306256 |
| 10391.03706               |                         |             |             |
| PLD6 PLD6                 | 1062.433781             | 1391.360018 | 1255.355189 |
| 1136.018841               |                         |             |             |
| FTSJ2 FTSJ2               | 3188.472715             | 4374.151531 | 2916.959745 |
| 2869.74386                |                         |             |             |

|                |                |             |             |             |             |
|----------------|----------------|-------------|-------------|-------------|-------------|
| PSMC5          | PSMC5          | 14512.1192  | 18496.96351 | 10603.55492 |             |
| 12031.42942    |                |             |             |             |             |
| CR1            | CR1            | 8.199599194 | 0           | 0           | 37.71016899 |
| MIR601         | MIR601         | 1.171371313 | 1.015591254 | 0           | 1.885508449 |
| MIR600         | MIR600         | 2.342742627 | 0           | 0           | 4.713771124 |
| MIR593         | MIR593         | 2.342742627 | 3.046773762 | 0.892855753 |             |
| 0.942754225    |                |             |             |             |             |
| MIR550A1       | MIR550A1       |             | 0           | 0           | 2.678567259 |
| YDJC           | YDJC           | 2243.176065 | 3223.48664  | 3072.31664  | 0           |
| 2390.824714    |                |             |             |             |             |
| GPATCH8        | GPATCH8        | 3654.678498 | 3222.471049 | 3891.958227 |             |
| 3960.510498    |                |             |             |             |             |
| LOC100129518   | LOC100129518   |             | 644.2542224 | 941.4530925 |             |
| 522.3206155    | 613.7330003    |             |             |             |             |
| KCNC4          | KCNC4          | 77.31050669 | 49.76397145 | 149.9997665 |             |
| 239.4595731    |                |             |             |             |             |
| RAB6C-AS1      | RAB6C-AS1      |             | 4.685485254 | 1.015591254 |             |
| 0.892855753    | 0              |             |             |             |             |
| SNHG4          | SNHG4          | 110.1089035 | 76.16934405 | 105.3569789 |             |
| 55.62249926    |                |             |             |             |             |
| ANGPT2         | ANGPT2         | 121.8226166 | 168.5881482 | 152.6783338 |             |
| 164.0392351    |                |             |             |             |             |
| LCN15          | LCN15          | 0           | 0           | 6.249990271 | 0           |
| SPACA5         | SPACA5         | 2.342742627 | 0           | 0           | 0           |
| C7orf55-LUC7L2 | C7orf55-LUC7L2 |             | 10029.28119 | 10503.24475 |             |
| 9497.306645    | 9344.579875    |             |             |             |             |
| HYLS1          | HYLS1          | 1015.578929 | 1481.74764  | 764.2845246 |             |
| 676.8975333    |                |             |             |             |             |
| CCNY           | CCNY           | 1456.014543 | 2506.479215 | 2546.424608 |             |
| 2748.128565    |                |             |             |             |             |
| OSBPL7         | OSBPL7         | 905.4700253 | 839.8939671 | 431.2493287 |             |
| 719.3214735    |                |             |             |             |             |
| THEM5          | THEM5          | 165.1633552 | 204.1338421 | 259.8210241 |             |
| 431.7814349    |                |             |             |             |             |
| PRSS27         | PRSS27         | 16.39919839 | 15.23386881 | 9.821413283 |             |
| 24.51160984    |                |             |             |             |             |
| MAGT1          | MAGT1          | 5774.860575 | 5526.847605 | 4925.885189 |             |
| 5281.309167    |                |             |             |             |             |
| POM121C        | POM121C        | 2226.776867 | 1909.311558 | 1841.961419 |             |
| 1924.161373    |                |             |             |             |             |
| LOC101927830   | LOC101927830   |             | 8.199599194 | 4.062365016 |             |
| 10.71426904    | 7.542033798    |             |             |             |             |
| KLHL32         | KLHL32         | 12.88508445 | 15.23386881 | 133.0355072 |             |
| 113.130507     |                |             |             |             |             |
| PHEX           | PHEX           | 178.0484396 | 96.48116913 | 111.6069691 |             |
| 180.0660569    |                |             |             |             |             |
| ATP6V0C        | ATP6V0C        | 2517.276953 | 1420.812164 | 1705.354488 |             |
| 1372.650151    |                |             |             |             |             |
| EEA1           | EEA1           | 472.0626393 | 478.3434807 | 1366.069302 |             |
| 1136.961595    |                |             |             |             |             |

|          |          |             |             |             |             |
|----------|----------|-------------|-------------|-------------|-------------|
| KYNU     | KYNU     | 0           | 0           | 75.89273901 | 63.16453306 |
| RTDR1    | RTDR1    | 0           | 1.015591254 | 6.249990271 | 0           |
| ANKIB1   | ANKIB1   | 1036.663612 |             | 662.1654976 | 552.6777111 |
|          |          | 623.1605425 |             |             |             |
| DKK2     | DKK2     | 0           | 0           | 0           | 0.942754225 |
| CLPTM1   | CLPTM1   | 3251.726766 |             | 1590.415904 | 1517.85478  |
|          |          | 1545.174174 |             |             |             |
| MIS18A   | MIS18A   | 1297.879415 |             | 1477.685275 | 778.5702166 |
|          |          | 907.8723184 |             |             |             |
| CCDC93   | CCDC93   | 2004.216317 |             | 1642.211058 | 2496.424685 |
|          |          | 2048.60493  |             |             |             |
| SIN3A    | SIN3A    | 4696.027596 |             | 2802.01627  | 4227.671991 |
|          |          | 4070.812742 |             |             |             |
| KLRF1    | KLRF1    | 12.88508445 |             | 8.124730032 | 20.53568232 |
|          |          | 6.599279573 |             |             |             |
| DGKA     | DGKA     | 22574.66795 |             | 22484.17477 | 16266.04611 |
|          |          | 19140.73902 |             |             |             |
| STT3A    | STT3A    | 12484.47546 |             | 16715.61645 | 9616.949316 |
|          |          | 11217.83252 |             |             |             |
| SCIN     | SCIN     | 39.82662466 |             | 12.18709505 | 53.57134518 |
|          |          | 52.79423658 |             |             |             |
| SEC16B   | SEC16B   | 2.342742627 |             | 0           | 0           |
| PI16     | PI16     | 97.22381902 |             | 124.9177242 | 48.21421066 |
|          |          | 61.27902461 |             |             |             |
| KIAA1919 | KIAA1919 |             |             | 301.0424276 | 278.2720036 |
|          |          | 357.1423012 |             | 208.3486837 |             |
| CD01     | CD01     | 0           | 9.140321286 | 9.821413283 | 0           |
| AHRR     | AHRR     | 3659.363983 |             | 3639.879055 | 2211.6037   |
|          |          | 2365.37035  |             |             |             |
| MRPL46   | MRPL46   | 2183.436128 |             | 3018.337207 | 2015.175435 |
|          |          | 2317.289884 |             |             |             |
| ZNF165   | ZNF165   | 65.59679355 |             | 33.51451138 | 155.356901  |
|          |          | 129.1573288 |             |             |             |
| KRT8     | KRT8     | 25.7701689  |             | 30.46773762 | 166.0711701 |
|          |          | 119.7297865 |             |             |             |
| ZSCAN20  | ZSCAN20  | 58.56856567 |             | 71.09138778 | 149.1069108 |
|          |          | 184.779828  |             |             |             |
| SYAP1    | SYAP1    | 2093.240537 |             | 2985.838287 | 2573.21028  |
|          |          | 1809.145357 |             |             |             |
| FANK1    | FANK1    | 22.25605496 |             | 124.9177242 | 75.89273901 |
|          |          | 77.30584643 |             |             |             |
| ENTHD2   | ENTHD2   | 626.6836527 |             | 250.8510398 | 372.320849  |
|          |          | 329.0212244 |             |             |             |
| LIG3     | LIG3     | 2551.246721 |             | 2330.781928 | 1876.782793 |
|          |          | 2445.504459 |             |             |             |
| CD300LF  | CD300LF  | 1.171371313 |             | 0           | 17.85711506 |
| ADD2     | ADD2     | 142.9073002 |             | 117.8085855 | 113.3926806 |
|          |          | 159.325464  |             |             |             |
| KCNJ15   | KCNJ15   | 57.39719436 |             | 52.81074521 | 242.8567648 |
|          |          | 37.71016899 |             |             |             |

|                 |              |               |               |
|-----------------|--------------|---------------|---------------|
| CYB561D2        | CYB561D2     | 2923.742798   | 3840.966123   |
| 2638.38875      | 2455.874755  |               |               |
| PNRC1 PNRC1     | 3543.398223  | 2216.020116   | 13547.30034   |
| 12467.92462     |              |               |               |
| DNASE1L2        | DNASE1L2     | 11.71371313   | 7.109138778   |
| 8.035701777     | 5.656525348  |               |               |
| DNAH9 DNAH9     | 0 0          | 0.892855753   | 0             |
| TXK TXK         | 1409.15969   | 1109.025649   | 2158.925211   |
| 2258.839122     |              |               |               |
| KHNYN KHNYN     | 7256.645287  | 6549.547997   | 9720.520583   |
| 8865.660729     |              |               |               |
| EHMT1-IT1       | EHMT1-IT1    | 2.342742627   | 2.031182508   |
| 2.678567259     | 15.0840676   |               |               |
| LINC00115       | LINC00115    | 40.99799597   | 50.7795627    |
| 16.96425931     | 47.13771124  |               |               |
| RRN3P3 RRN3P3   | 882.042599   | 868.3305222   | 558.0348456   |
| 601.4771954     |              |               |               |
| MX1 MX1         | 27206.27013  | 29676.59203   | 25417.81758   |
| 21753.11098     |              |               |               |
| C6orf223        | C6orf223     | 0 0           | 0 5.656525348 |
| DAGLB DAGLB     | 1176.056799  | 1575.182035   | 1375.890715   |
| 1406.589303     |              |               |               |
| PAQR7 PAQR7     | 16.39919839  | 5.07795627    | 22.32139383   |
| 47.13771124     |              |               |               |
| LCE1F LCE1F     | 0 0          | 12.49998054   | 0             |
| LCE1C LCE1C     | 0 0          | 39.28565313   | 0             |
| IGLL3P IGLL3P   | 0 0          | 0.892855753   | 0             |
| MIR658 MIR658   | 69.11090749  | 84.29407409   | 67.85703723   |
| 63.16453306     |              |               |               |
| UNQ6494 UNQ6494 | 1882.393701  | 2607.022749   | 389.2851083   |
| 916.3571064     |              |               |               |
| AGPAT4-IT1      | AGPAT4-IT1   | 10.54234182   | 21.32741634   |
| 6.249990271     | 18.85508449  |               |               |
| VAT1 VAT1       | 1191.284626  | 1457.37345    | 3053.566675   |
| 1987.325906     |              |               |               |
| BAI2 BAI2       | 2.342742627  | 4.062365016   | 10.71426904   |
| 25.45436407     |              |               |               |
| RBP2 RBP2       | 0 0          | 8.035701777   | 1.885508449   |
| RAB27B RAB27B   | 19.91331233  | 6.093547524   | 95.53556557   |
| 145.1841506     |              |               |               |
| LTBR LTBR       | 4.685485254  | 9.140321286   | 0 1.885508449 |
| IRF2 IRF2       | 8061.377379  | 7884.034905   | 9002.664558   |
| 9218.250809     |              |               |               |
| ANKRD29 ANKRD29 | 9.370970508  | 31.48332888   | 0 4.713771124 |
| CYP17A1 CYP17A1 | 0 0          | 0 2.828262674 |               |
| COL4A4 COL4A4   | 15.22782708  | 2.031182508   | 26.78567259 0 |
| PCYT1A PCYT1A   | 1980.788891  | 2736.002838   | 1216.962391   |
| 1406.589303     |              |               |               |
| LOC103611081    | LOC103611081 | 33.96976809   | 20.31182508   |
| 25.89281684     | 67.87830418  |               |               |

|              |              |             |             |             |             |
|--------------|--------------|-------------|-------------|-------------|-------------|
| SYNP02L      | SYNP02L      | 0           | 3.046773762 | 0           | 3.771016899 |
| MAP6D1       | MAP6D1       | 140.5645576 | 196.009112  |             | 177.6782949 |
| 161.2109724  |              |             |             |             |             |
| CAV1         | CAV1         | 244.8166045 | 145.2295493 |             | 61.60704696 |
| 191.3791076  |              |             |             |             |             |
| PRPS1        | PRPS1        | 4000.233035 | 2350.078162 |             | 2478.56757  |
| 2194.731835  |              |             |             |             |             |
| SPSB2        | SPSB2        | 654.7965642 | 343.2698439 |             | 647.3204209 |
| 803.2265995  |              |             |             |             |             |
| ARC          | ARC          | 11.71371313 | 16.24946006 |             | 41.07136464 |
| 13.19855915  |              |             |             |             |             |
| TRAPPC1      | TRAPPC1      | 6697.90117  | 5834.571755 |             | 3079.459492 |
| 3482.534106  |              |             |             |             |             |
| WFDC1        | WFDC1        | 0           | 36.56128515 | 0           | 0           |
| SNRPB2       | SNRPB2       | 3981.491094 | 3730.266676 |             | 2718.745768 |
| 3044.153392  |              |             |             |             |             |
| CDCA5        | CDCA5        | 8370.619406 | 9298.753522 |             | 3199.102163 |
| 4999.425654  |              |             |             |             |             |
| MED31        | MED31        | 1124.516461 | 983.0923339 |             | 1203.569555 |
| 1104.907951  |              |             |             |             |             |
| LOC100507547 | LOC100507547 | 0           | 3.046773762 |             | 2.678567259 |
| 2.828262674  |              |             |             |             |             |
| ATMIN        | ATMIN        | 6059.503805 | 6773.993665 |             | 6566.061208 |
| 6225.006146  |              |             |             |             |             |
| FAM118A      | FAM118A      | 2968.254908 | 2119.538947 |             | 5183.920502 |
| 4276.333163  |              |             |             |             |             |
| NKX3-1       | NKX3-1       | 37.48388203 | 0           | 74.99988325 | 39.59567744 |
| CLUH         | CLUH         | 3646.478899 | 2780.688854 |             | 2255.353632 |
| 2347.45802   |              |             |             |             |             |
| SCN9A        | SCN9A        | 71.45365012 | 10.15591254 | 0           | 16.96957604 |
| LOC339059    | LOC339059    | 0           | 0           | 0.892855753 | 0           |
| HDDC3        | HDDC3        | 1024.949899 | 1880.875003 |             | 1608.033211 |
| 1168.072484  |              |             |             |             |             |
| SIGLEC5      | SIGLEC5      | 0           | 1.015591254 | 0           | 0           |
| RTN2         | RTN2         | 37.48388203 | 43.67042392 |             | 11.60712479 |
| 47.13771124  |              |             |             |             |             |
| CNTN3        | CNTN3        | 0           | 0           | 0.942754225 |             |
| ANK3         | ANK3         | 691.1090749 | 440.7666043 |             | 2686.602961 |
| 2865.030089  |              |             |             |             |             |
| IFNG         | IFNG         | 2497.36364  | 1651.351379 |             | 3226.780691 |
| 2884.827928  |              |             |             |             |             |
| MAN2B1       | MAN2B1       | 7474.520351 | 11231.42368 |             | 4519.635822 |
| 5382.183869  |              |             |             |             |             |
| PPP6R2       | PPP6R2       | 4165.396391 | 4793.590719 |             | 3529.458792 |
| 3849.2655    |              |             |             |             |             |
| KCTD14       | KCTD14       | 15.22782708 | 37.5768764  |             | 49.99992217 |
| 2.828262674  |              |             |             |             |             |
| AACS         | AACS         | 803.560721  | 1255.27079  |             | 1468.747714 |
| 1147.331891  |              |             |             |             |             |
| MIR1287      | MIR1287      | 11.71371313 | 4.062365016 | 0           | 10.37029647 |

|             |           |             |             |             |             |
|-------------|-----------|-------------|-------------|-------------|-------------|
| PIEZ01      | PIEZ01    | 9727.067387 | 5635.515869 | 2490.174695 |             |
| 3388.258684 |           |             |             |             |             |
| DZIP3       | DZIP3     | 1385.732264 | 1038.949853 | 849.1058211 |             |
| 917.2998606 |           |             |             |             |             |
| PGD         | PGD       | 7039.941594 | 11006.97801 | 5637.491225 |             |
| 5044.677856 |           |             |             |             |             |
| JUNB        | JUNB      | 19320.59844 | 20538.30193 | 15980.33227 |             |
| 19119.05568 |           |             |             |             |             |
| JUN         | JUN       | 1488.812939 | 2236.331941 | 2674.995836 |             |
| 1929.817898 |           |             |             |             |             |
| ITPR2       | ITPR2     | 1389.246378 | 741.3816155 | 1066.962625 |             |
| 1195.412357 |           |             |             |             |             |
| CDCA7L      | CDCA7L    | 3747.216832 | 6084.407203 | 2744.638585 |             |
| 2275.808698 |           |             |             |             |             |
| CCL1        | CCL1      | 219.0464356 | 83.27848283 | 8114.273084 |             |
| 1986.383151 |           |             |             |             |             |
| CPSF1       | CPSF1     | 7591.657483 | 7257.415101 | 3401.780419 |             |
| 5520.76874  |           |             |             |             |             |
| ARFGEF1     | ARFGEF1   | 4402.013396 | 2742.096386 | 3656.244309 |             |
| 3808.727068 |           |             |             |             |             |
| SLC6A13     | SLC6A13   | 3.51411394  | 0           | 2.678567259 | 1.885508449 |
| UCMA        | UCMA      | 0           | 1.015591254 | 0           | 0           |
| RANBP17     | RANBP17   | 0           | 1.015591254 | 0           | 0           |
| LYNX1       | LYNX1     | 1.171371313 | 2.031182508 | 16.07140355 |             |
| 5.656525348 |           |             |             |             |             |
| CAMKV       | CAMKV     | 4.685485254 | 0           | 11.60712479 | 0           |
| ZNF317      | ZNF317    | 3423.918349 | 4090.801571 | 4743.742616 |             |
| 4255.59257  |           |             |             |             |             |
| ANAPC13     | ANAPC13   | 1827.339249 | 1490.887961 | 2739.28145  |             |
| 2874.457631 |           |             |             |             |             |
| YIPF3       | YIPF3     | 5155.205151 | 5515.676101 | 4466.064477 |             |
| 4128.32075  |           |             |             |             |             |
| TECPR1      | TECPR1    | 1687.946063 | 1340.580455 | 1424.997782 |             |
| 848.4788022 |           |             |             |             |             |
| ICOS        | ICOS      | 14208.73403 | 16863.89277 | 7684.809466 |             |
| 9601.951779 |           |             |             |             |             |
| SCUBE1      | SCUBE1    | 39.82662466 | 19.29623383 | 0           | 1.885508449 |
| AUNIP       | AUNIP     | 1192.455997 | 1640.179875 | 932.1414062 |             |
| 1197.297865 |           |             |             |             |             |
| GIT2        | GIT2      | 10364.29338 | 11378.68441 | 7971.416163 |             |
| 9777.304065 |           |             |             |             |             |
| COL16A1     | COL16A1   | 0           | 0           | 8.92855753  | 0           |
| IGSF9       | IGSF9     | 4.685485254 | 1.015591254 | 5.357134518 |             |
| 24.51160984 |           |             |             |             |             |
| LOC728637   | LOC728637 |             | 2.342742627 | 0           | 7.142846024 |
| 1.885508449 |           |             |             |             |             |
| NET01       | NET01     | 0           | 0           | 5.357134518 | 1.885508449 |
| APLP1       | APLP1     | 53.88308042 | 35.54569389 | 117.8569594 |             |
| 8.484788022 |           |             |             |             |             |
| TBC1D10A    | TBC1D10A  |             | 2275.974462 | 2620.225435 |             |



|                 |               |               |               |  |
|-----------------|---------------|---------------|---------------|--|
| 2638.38875      | 1888.336712   |               |               |  |
| ZNF512B ZNF512B | 454.4920696   | 235.6171709   | 167.8568816   |  |
| 312.0516484     |               |               |               |  |
| ANG ANG         | 28.11291152   | 81.24730032   | 90.17843106   |  |
| 41.48118589     |               |               |               |  |
| LRRIQ3 LRRIQ3   | 100.737933    | 90.38762161   | 123.2140939   |  |
| 117.8442781     |               |               |               |  |
| LM07 LM07       | 283.4718579   | 158.4322356   | 1272.319448   |  |
| 1665.846715     |               |               |               |  |
| C12orf77        | C12orf77      | 0 0           | 0 5.656525348 |  |
| CLASP2 CLASP2   | 4517.979156   | 2922.871629   | 2456.246177   |  |
| 3137.48606      |               |               |               |  |
| POU2F2 POU2F2   | 1506.383509   | 1546.74548    | 703.5703334   |  |
| 963.4948177     |               |               |               |  |
| EDF1 EDF1       | 8353.048836   | 10768.31407   | 8019.630374   |  |
| 7569.37367      |               |               |               |  |
| SELO SEL0       | 1491.155682   | 1541.667524   | 1142.855364   |  |
| 1189.755832     |               |               |               |  |
| AMMECR1L        | AMMECR1L      | 1375.189922   | 1242.068104   |  |
| 1865.175668     | 1668.674978   |               |               |  |
| SDC1 SDC1       | 12.88508445   | 5.07795627    | 41.07136464   |  |
| 9.427542247     |               |               |               |  |
| SH3GL1 SH3GL1   | 2123.696191   | 1569.088488   | 1138.391085   |  |
| 1146.389137     |               |               |               |  |
| ITSN1 ITSN1     | 101.9093043   | 157.4166444   | 255.3567454   |  |
| 173.4667773     |               |               |               |  |
| GNB1 GNB1       | 23339.57342   | 26227.64414   | 13924.97832   |  |
| 15079.35382     |               |               |               |  |
| CASP3 CASP3     | 14961.92579   | 20825.71426   | 7305.345771   |  |
| 8717.648316     |               |               |               |  |
| BAD BAD         | 2113.153849   | 2752.252298   | 1155.355344   |  |
| 1290.630534     |               |               |               |  |
| TAPBP TAPBP     | 634.8832519   | 482.4058457   | 592.85622     |  |
| 902.2157931     |               |               |               |  |
| HIST1H2AJ       | HIST1H2AJ     | 213.1895791   | 157.4166444   |  |
| 54.46420093     | 75.42033798   |               |               |  |
| HIST1H2BJ       | HIST1H2BJ     | 59.73993699   | 116.7929942   |  |
| 36.60708587     | 25.45436407   |               |               |  |
| LMTK2 LMTK2     | 1051.891439   | 529.1230434   | 1283.033717   |  |
| 774.0012185     |               |               |               |  |
| KDM1A KDM1A     | 7308.185625   | 8038.404776   | 6037.490602   |  |
| 7411.933715     |               |               |               |  |
| TIMP3 TIMP3     | 0 2.031182508 | 0             | 7.542033798   |  |
| KLRC2 KLRC2     | 0 14.21827756 | 12.49998054   | 0             |  |
| KLK1 KLK1       | 21.08468364   | 5.07795627    | 4.464278765   |  |
| 2.828262674     |               |               |               |  |
| SLC33A1 SLC33A1 | 2171.722415   | 2373.436761   | 2141.068096   |  |
| 1965.642559     |               |               |               |  |
| GRHL2 GRHL2     | 0 0           | 0 0.942754225 |               |  |
| PCMT1 PCMT1     | 9903.944455   | 12967.06913   | 9279.449841   |  |

|                 |             |               |             |   |  |
|-----------------|-------------|---------------|-------------|---|--|
| 8690.308443     |             |               |             |   |  |
| PRKCE PRKCE     | 55.05445173 | 21.32741634   | 130.3569399 |   |  |
| 153.6689386     |             |               |             |   |  |
| PIGK PIGK       | 2828.861722 | 2574.523829   | 2199.996575 |   |  |
| 2486.985645     |             |               |             |   |  |
| MED16 MED16     | 7837.645458 | 8720.882099   | 5791.062414 |   |  |
| 6768.032579     |             |               |             |   |  |
| CNPY3 CNPY3     | 2777.321384 | 3380.903285   | 5233.027569 |   |  |
| 3916.201049     |             |               |             |   |  |
| DNAJC4 DNAJC4   | 767.2482103 | 557.5595985   | 635.7132962 |   |  |
| 713.6649481     |             |               |             |   |  |
| LGALS8 LGALS8   | 6359.374861 | 5756.371228   | 7152.667438 |   |  |
| 8226.473365     |             |               |             |   |  |
| RPS21 RPS21     | 5752.60452  | 5103.346052   | 5585.705591 |   |  |
| 5249.255523     |             |               |             |   |  |
| DSP DSP         | 7.028227881 | 12.18709505   | 18.74997081 | 0 |  |
| RBBP9 RBBP9     | 1419.702032 | 1183.163811   | 1091.06973  |   |  |
| 1134.133332     |             |               |             |   |  |
| C19orf53        | C19orf53    | 4040.05966    | 5025.145525 |   |  |
| 3755.351297     | 3397.686226 |               |             |   |  |
| MGAT3 MGAT3     | 50.36896648 | 12.18709505   | 7.142846024 |   |  |
| 15.0840676      |             |               |             |   |  |
| ERH ERH         | 4957.243399 | 3401.21511    | 2645.531596 |   |  |
| 3332.636184     |             |               |             |   |  |
| EPHB4 EPHB4     | 5.856856567 | 0 3.571423012 | 2.828262674 |   |  |
| NME1 NME1       | 11210.02347 | 16251.49125   | 7606.23816  |   |  |
| 9357.778435     |             |               |             |   |  |
| ZNF565 ZNF565   | 158.1351273 | 194.9935208   | 470.5349818 |   |  |
| 312.0516484     |             |               |             |   |  |
| CENPN CENPN     | 6779.897162 | 6086.438386   | 3148.209385 |   |  |
| 3357.147794     |             |               |             |   |  |
| ZNF576 ZNF576   | 657.1393069 | 643.8848551   | 904.4628778 |   |  |
| 724.0352446     |             |               |             |   |  |
| C19orf57        | C19orf57    | 146.4214142   | 224.4456671 |   |  |
| 242.8567648     | 268.684954  |               |             |   |  |
| NUDT16 NUDT16   | 732.1070709 | 705.8359216   | 588.3919412 |   |  |
| 606.1909665     |             |               |             |   |  |
| RNMTL1 RNMTL1   | 2123.696191 | 2843.655511   | 2434.817639 |   |  |
| 2124.968023     |             |               |             |   |  |
| SRD5A3 SRD5A3   | 1150.28663  | 1170.976716   | 574.1062492 |   |  |
| 855.0780818     |             |               |             |   |  |
| HECTD3 HECTD3   | 4918.588145 | 5682.233066   | 4207.136308 |   |  |
| 4710.942861     |             |               |             |   |  |
| KIAA1551        | KIAA1551    | 13238.83858   | 8601.042331 |   |  |
| 20075.86161     | 23037.14224 |               |             |   |  |
| NADSYN1 NADSYN1 | 4140.797593 | 4637.189666   | 2919.638312 |   |  |
| 3140.314323     |             |               |             |   |  |
| TFAP2A TFAP2A   | 4.685485254 | 6.093547524   | 5.357134518 |   |  |
| 3.771016899     |             |               |             |   |  |
| LONRF3 LONRF3   | 29.28428284 | 93.43439537   | 427.6779057 |   |  |

|                 |              |             |               |  |
|-----------------|--------------|-------------|---------------|--|
| 357.3038512     |              |             |               |  |
| LOC101929829    | LOC101929829 | 30.45565415 | 18.28064257   |  |
| 25.89281684     | 27.33987252  |             |               |  |
| CELSR3-AS1      | CELSR3-AS1   | 8.199599194 | 5.07795627    |  |
| 8.92855753      | 0.942754225  |             |               |  |
| TBX1 TBX1       | 3.51411394   | 12.18709505 | 12.49998054   |  |
| 2.828262674     |              |             |               |  |
| ZKSCAN4 ZKSCAN4 | 335.0121956  | 368.6596252 | 608.9276236   |  |
| 477.0336377     |              |             |               |  |
| UBOX5 UBOX5     | 1434.929859  | 1463.466997 | 1660.711701   |  |
| 1217.095704     |              |             |               |  |
| LGALS3 LGALS3   | 6219.981674  | 9128.134191 | 3644.637184   |  |
| 5289.793955     |              |             |               |  |
| RGPD4 RGPD4     | 5.856856567  | 4.062365016 | 16.96425931   |  |
| 4.713771124     |              |             |               |  |
| ACTR8 ACTR8     | 2867.516975  | 3951.66557  | 2860.709833   |  |
| 1767.664171     |              |             |               |  |
| UBE2F-SCLY      | UBE2F-SCLY   | 8676.347319 | 10164.03727   |  |
| 5231.241857     | 5012.624213  |             |               |  |
| TFRC TFRC       | 130797.6636  | 94296.63235 | 27867.81376   |  |
| 56767.00289     |              |             |               |  |
| TDRD10 TDRD10   | 2.342742627  | 0 0         | 0             |  |
| C8orf37-AS1     | C8orf37-AS1  | 1.171371313 | 5.07795627    |  |
| 10.71426904     | 2.828262674  |             |               |  |
| SAMD3 SAMD3     | 1527.468193  | 1762.050826 | 766.9630919   |  |
| 484.5756715     |              |             |               |  |
| OSGIN1 OSGIN1   | 14.05645576  | 180.7752432 | 224.9996498   |  |
| 104.6457189     |              |             |               |  |
| LOC100505716    | LOC100505716 | 26.94154021 | 24.3741901    |  |
| 80.35701777     | 61.27902461  |             |               |  |
| SSR4P1 SSR4P1   | 45.68348122  | 16.24946006 | 15.1785478    |  |
| 30.16813519     |              |             |               |  |
| UCKL1-AS1       | UCKL1-AS1    | 296.3569423 | 196.009112    |  |
| 264.2853029     | 241.3450815  |             |               |  |
| LOC399815       | LOC399815    | 101.9093043 | 99.5279429    |  |
| 149.9997665     | 137.6421168  |             |               |  |
| MGC45800        | MGC45800     | 0 0         | 0.892855753 0 |  |
| C1orf220        | C1orf220     | 2.342742627 | 0 14.28569205 |  |
| 0               |              |             |               |  |
| CCT4 CCT4       | 18656.43091  | 18498.99469 | 15981.22512   |  |
| 19373.59932     |              |             |               |  |
| SNORA57 SNORA57 | 29.28428284  | 16.24946006 | 47.32135491   |  |
| 31.11088942     |              |             |               |  |
| SNORA16B        | SNORA16B     | 4.685485254 | 4.062365016   |  |
| 2.678567259     | 0            |             |               |  |
| SCARNA14        | SCARNA14     | 3.51411394  | 2.031182508   |  |
| 0.892855753     | 4.713771124  |             |               |  |
| SNORD105        | SNORD105     | 1.171371313 | 3.046773762   |  |
| 5.357134518     | 3.771016899  |             |               |  |
| SNORD104        | SNORD104     | 21.08468364 | 8.124730032   |  |

|             |             |             |             |             |             |
|-------------|-------------|-------------|-------------|-------------|-------------|
| 29.46423985 | 28.28262674 |             |             |             |             |
| SNORD94     | SNORD94     | 19.91331233 | 5.07795627  | 24.99996108 |             |
| 14.14131337 |             |             |             |             |             |
| STAP2       | STAP2       | 323.2984825 | 601.2300224 | 325.8923499 |             |
| 153.6689386 |             |             |             |             |             |
| CADM2       | CADM2       | 24.59879758 | 10.15591254 | 28.5713841  |             |
| 28.28262674 |             |             |             |             |             |
| MINA        | MINA        | 4156.02542  | 11536.10105 | 2917.852601 |             |
| 2845.23225  |             |             |             |             |             |
| TSC22D2     | TSC22D2     | 1075.318866 | 777.9429006 | 1850.889976 |             |
| 1297.229813 |             |             |             |             |             |
| URB2        | URB2        | 2562.960434 | 2182.505605 | 1588.390385 |             |
| 2420.992849 |             |             |             |             |             |
| PDGFRA      | PDGFRA      | 15.22782708 | 27.42096386 | 24.10710533 | 0           |
| PDE6H       | PDE6H       | 0           | 0           | 0.892855753 | 0           |
| PAX9        | PAX9        | 5.856856567 | 0           | 0           | 0           |
| CRABP1      | CRABP1      | 1.171371313 | 0           | 0           | 0.942754225 |
| ZNF295-AS1  | ZNF295-AS1  | 19.91331233 | 6.093547524 |             |             |
| 12.49998054 | 83.905126   |             |             |             |             |
| NMT2        | NMT2        | 1117.488233 | 2369.374396 | 1933.925561 |             |
| 1613.995233 |             |             |             |             |             |
| MLXIP       | MLXIP       | 2748.037101 | 2047.431968 | 3349.994785 |             |
| 2698.162591 |             |             |             |             |             |
| C20orf173   | C20orf173   | 2.342742627 | 0           | 13.3928363  |             |
| 4.713771124 |             |             |             |             |             |
| XDH         | XDH         | 0           | 3.046773762 | 0           | 0           |
| PTMA        | PTMA        | 63525.80907 | 63817.72322 | 48923.13813 |             |
| 49019.44867 |             |             |             |             |             |
| MROH1       | MROH1       | 1659.833151 | 1582.291174 | 1181.248161 |             |
| 1817.630145 |             |             |             |             |             |
| CCDC17      | CCDC17      | 31.62702546 | 11.17150379 | 49.99992217 |             |
| 13.19855915 |             |             |             |             |             |
| EFCAB13     | EFCAB13     | 32.79839678 | 30.46773762 | 326.7852056 |             |
| 162.1537267 |             |             |             |             |             |
| ECI2        | ECI2        | 2708.210477 | 3436.760804 | 4465.171621 |             |
| 3863.406813 |             |             |             |             |             |
| EOGT        | EOGT        | 1910.506612 | 1528.464837 | 890.1771858 |             |
| 1340.596508 |             |             |             |             |             |
| ADTRP       | ADTRP       | 910.1555106 | 1583.306765 | 1781.247227 |             |
| 1349.081296 |             |             |             |             |             |
| PLEKHA8     | PLEKHA8     | 514.2320066 | 470.2187506 | 423.2136269 |             |
| 436.495206  |             |             |             |             |             |
| TMEM5       | TMEM5       | 1212.369309 | 1434.014851 | 1418.747792 |             |
| 1452.78426  |             |             |             |             |             |
| HSPA1B      | HSPA1B      | 31.62702546 | 44.68601518 | 87.4998638  |             |
| 69.76381263 |             |             |             |             |             |
| EGFL7       | EGFL7       | 40.99799597 | 80.23170907 | 0           | 21.68334717 |
| ZNF134      | ZNF134      | 1198.312854 | 952.6245963 | 1905.354177 |             |
| 1566.857521 |             |             |             |             |             |
| ECI1        | ECI1        | 2485.649927 | 2656.786721 | 2000.889743 |             |

|                 |               |               |             |  |
|-----------------|---------------|---------------|-------------|--|
| 2081.601328     |               |               |             |  |
| PHC2 PHC2       | 3450.859889   | 3776.983874   | 4305.350441 |  |
| 3721.050925     |               |               |             |  |
| SEC24D SEC24D   | 4728.825992   | 5837.618528   | 3717.851356 |  |
| 2936.67941      |               |               |             |  |
| POLE POLE       | 5764.318234   | 2434.372236   | 1749.997276 |  |
| 2237.155775     |               |               |             |  |
| ALDH18A1        | ALDH18A1      | 9086.327279   | 10079.7432  |  |
| 5021.420755     | 7064.057406   |               |             |  |
| ZNF585B ZNF585B | 323.2984825   | 254.9134048   | 1316.06938  |  |
| 1059.655749     |               |               |             |  |
| FAM58A FAM58A   | 1392.760492   | 2061.650246   | 1708.033056 |  |
| 1511.235022     |               |               |             |  |
| PARS2 PARS2     | 484.9477238   | 486.4682107   | 826.7844273 |  |
| 673.1265164     |               |               |             |  |
| OLFML2B OLFML2B | 7.028227881   | 0 0           | 0.942754225 |  |
| GORAB GORAB     | 698.1373028   | 677.3993665   | 979.4627611 |  |
| 774.9439727     |               |               |             |  |
| LOC643072       | LOC643072     | 55.05445173   | 56.87311023 |  |
| 50.89277792     | 49.96597391   |               |             |  |
| RAET1G RAET1G   | 2.342742627   | 0 0           | 3.771016899 |  |
| FRRS1 FRRS1     | 7.028227881   | 0 6.249990271 | 35.82466054 |  |
| VSIG8 VSIG8     | 5.856856567   | 4.062365016   | 14.28569205 |  |
| 4.713771124     |               |               |             |  |
| SLC2A4RG        | SLC2A4RG      | 564.6009731   | 146.2451406 |  |
| 138.3926417     | 148.9551675   |               |             |  |
| ASB8 ASB8       | 2774.978642   | 2856.858198   | 3697.315673 |  |
| 3246.84555      |               |               |             |  |
| TUBA4A TUBA4A   | 21405.63938   | 28112.5815    | 13267.83649 |  |
| 16342.64449     |               |               |             |  |
| FRS3 FRS3       | 134.707701    | 53.82633646   | 183.9282851 |  |
| 157.4399555     |               |               |             |  |
| MIR3610 MIR3610 | 35.1411394    | 8.124730032   | 6.249990271 |  |
| 14.14131337     |               |               |             |  |
| MIR3607 MIR3607 | 0 2.031182508 | 10.71426904   | 2.828262674 |  |
| MIR3605 MIR3605 | 283.4718579   | 385.9246765   | 432.1421845 |  |
| 378.9871983     |               |               |             |  |
| PRH1-PRR4       | PRH1-PRR4     | 898.4417974   | 992.2326552 |  |
| 1147.319643     | 869.2193952   |               |             |  |
| LOC731424       | LOC731424     | 0 1.015591254 | 17.85711506 |  |
| 0               |               |               |             |  |
| PPP2R1A PPP2R1A | 18710.31399   | 24396.5331    | 17623.18685 |  |
| 17876.50561     |               |               |             |  |
| EVI2A EVI2A     | 2352.113597   | 1640.179875   | 2597.317386 |  |
| 2803.751064     |               |               |             |  |
| SCAMP3 SCAMP3   | 7078.596847   | 11213.14304   | 9182.128564 |  |
| 8307.550228     |               |               |             |  |
| TMEM121 TMEM121 | 134.707701    | 212.2585721   | 151.785478  |  |
| 133.8710999     |               |               |             |  |
| SLC30A2 SLC30A2 | 0 0           | 0 0.942754225 |             |  |

|             |             |             |             |             |             |
|-------------|-------------|-------------|-------------|-------------|-------------|
| TIMM21      | TIMM21      | 2238.49058  | 2159.147006 | 2279.460737 |             |
| 2337.087723 |             |             |             |             |             |
| MED13L      | MED13L      | 634.8832519 | 315.84888   | 549.1062881 |             |
| 682.5540587 |             |             |             |             |             |
| TNFSF15     | TNFSF15     | 2.342742627 | 13.2026863  | 27.67852834 |             |
| 31.11088942 |             |             |             |             |             |
| CCDC42      | CCDC42      | 5.856856567 | 1.015591254 | 18.74997081 | 0           |
| TAPBPL      | TAPBPL      | 2591.073345 | 3587.068309 | 2713.388633 |             |
| 3015.870765 |             |             |             |             |             |
| SPSB1       | SPSB1       | 3358.321556 | 2062.665837 | 691.9632086 |             |
| 977.636131  |             |             |             |             |             |
| CTNNBIP1    | CTNNBIP1    |             | 304.5565415 | 244.7574922 |             |
| 250.8924666 | 281.8835132 |             |             |             |             |
| ADCK3       | ADCK3       | 3406.34778  | 5735.043812 | 6989.274835 |             |
| 4627.980489 |             |             |             |             |             |
| BMP2K       | BMP2K       | 1095.232178 | 771.8493531 | 269.6424374 |             |
| 433.6669434 |             |             |             |             |             |
| SPOCK1      | SPOCK1      | 15.22782708 | 19.29623383 | 0           | 2.828262674 |
| PCNXL2      | PCNXL2      | 897.2704261 | 410.2988666 | 567.8562589 |             |
| 620.3322799 |             |             |             |             |             |
| RAB2B       | RAB2B       | 952.3248778 | 852.0810621 | 1166.069613 |             |
| 1080.396342 |             |             |             |             |             |
| FIBCD1      | FIBCD1      | 0           | 0           | 0.942754225 |             |
| CCDC136     | CCDC136     | 110.1089035 | 86.32525659 | 69.64274874 |             |
| 223.4327513 |             |             |             |             |             |
| SPDYC       | SPDYC       | 0           | 0           | 0.942754225 |             |
| RUSC1-AS1   | RUSC1-AS1   |             | 2147.123618 | 2699.441553 |             |
| 1290.176563 | 1692.243833 |             |             |             |             |
| MED20       | MED20       | 2322.829315 | 2522.728675 | 1307.140822 |             |
| 1474.467607 |             |             |             |             |             |
| CHST3       | CHST3       | 85.51010588 | 0           | 17.85711506 | 11.3130507  |
| MIA-RAB4B   | MIA-RAB4B   |             | 2347.428112 | 2543.0405   |             |
| 2070.532491 | 2012.78027  |             |             |             |             |
| UGP2        | UGP2        | 10851.58385 | 18029.79153 | 8563.379527 |             |
| 8968.42094  |             |             |             |             |             |
| MLLT3       | MLLT3       | 1999.530832 | 3503.789826 | 3096.423752 |             |
| 2505.840729 |             |             |             |             |             |
| DHRS7       | DHRS7       | 3638.2793   | 5100.299278 | 6699.989571 |             |
| 5427.436072 |             |             |             |             |             |
| TMEM19      | TMEM19      | 1801.56908  | 1648.304605 | 1312.497957 |             |
| 1529.147352 |             |             |             |             |             |
| PRIM1       | PRIM1       | 3289.210648 | 2956.386141 | 2324.103525 |             |
| 2872.572123 |             |             |             |             |             |
| SVIL        | SVIL        | 377.1815629 | 201.0870683 | 394.6422428 |             |
| 590.1641447 |             |             |             |             |             |
| SUV39H1     | SUV39H1     | 4659.715085 | 5380.602464 | 2363.389178 |             |
| 2782.067717 |             |             |             |             |             |
| SURF1       | SURF1       | 1857.794903 | 2671.004998 | 2811.602766 |             |
| 1855.340314 |             |             |             |             |             |
| RGS16       | RGS16       | 510.7178927 | 1941.810478 | 4705.349818 |             |

|                           |             |             |             |             |
|---------------------------|-------------|-------------|-------------|-------------|
| 1926.989635               |             |             |             |             |
| C21orf2 C21orf2           | 880.8712277 | 947.54664   | 1290.176563 |             |
| 938.9832078               |             |             |             |             |
| ABCA13 ABCA13             | 0 0         | 0           | 0.942754225 |             |
| DNAJC18 DNAJC18           | 960.524477  | 1065.355226 | 602.6776333 |             |
| 786.2570234               |             |             |             |             |
| SLC23A1 SLC23A1           | 19.91331233 | 13.2026863  | 4.464278765 |             |
| 8.484788022               |             |             |             |             |
| CMBL CMBL                 | 31.62702546 | 37.5768764  | 36.60708587 |             |
| 19.79783872               |             |             |             |             |
| ACMSD ACMSD               | 11.71371313 | 26.40537261 | 26.78567259 |             |
| 16.96957604               |             |             |             |             |
| PPP1CC PPP1CC             | 16150.86767 | 11853.98112 | 10608.91206 |             |
| 13750.07037               |             |             |             |             |
| TPI1P3 TPI1P3             | 0 0         | 0           | 2.828262674 |             |
| SLIRP SLIRP               | 5394.164898 | 5138.891745 | 3333.030526 |             |
| 3577.752283               |             |             |             |             |
| OSTC OSTC                 | 5854.513825 | 6260.10449  | 4952.670862 |             |
| 4941.917646               |             |             |             |             |
| LAYN LAYN                 | 319.7843686 | 1208.553592 | 718.7488812 |             |
| 544.9119419               |             |             |             |             |
| LOC100506804 LOC100506804 |             | 21.08468364 | 42.65483267 |             |
| 116.0712479               | 47.13771124 |             |             |             |
| LOC441454 LOC441454       |             | 10.54234182 | 2.031182508 |             |
| 0.892855753               | 9.427542247 |             |             |             |
| FAM183B FAM183B           | 1.171371313 | 0           | 3.571423012 | 0           |
| ACOT11 ACOT11             | 110.1089035 | 102.5747167 | 0           | 135.7566084 |
| TMEM98 TMEM98             | 9.370970508 | 9.140321286 | 0           | 8.484788022 |
| TERF2IP TERF2IP           | 8726.716285 | 10684.01999 | 12932.12273 |             |
| 11000.99905               |             |             |             |             |
| TMX4 TMX4                 | 4947.872428 | 4095.879528 | 3640.172905 |             |
| 4103.80914                |             |             |             |             |
| TRIM33 TRIM33             | 3249.384024 | 3140.208158 | 3107.138021 |             |
| 3488.190631               |             |             |             |             |
| CRTAP CRTAP               | 2022.958258 | 2453.66847  | 2889.281217 |             |
| 2466.245052               |             |             |             |             |
| HTR1D HTR1D               | 0 0         | 1.785711506 | 0           |             |
| BORA BORA                 | 3694.505123 | 3774.952691 | 1566.068991 |             |
| 2214.529674               |             |             |             |             |
| C17orf59 C17orf59         |             | 1437.272602 | 1829.079849 |             |
| 2183.925172               | 1294.401551 |             |             |             |
| CROT CROT                 | 853.9296875 | 764.7402143 | 802.677322  |             |
| 1101.136934               |             |             |             |             |
| BCKDHA BCKDHA             | 3678.105924 | 5687.311023 | 4477.671601 |             |
| 4257.478079               |             |             |             |             |
| CREG1 CREG1               | 1885.907815 | 2318.594833 | 1989.282618 |             |
| 1585.712606               |             |             |             |             |
| TNC TNC                   | 8.199599194 | 21.32741634 | 16.96425931 |             |
| 21.68334717               |             |             |             |             |
| F10 F10                   | 3.51411394  | 0           | 0           | 0.942754225 |

|              |              |             |             |             |
|--------------|--------------|-------------|-------------|-------------|
| RPS7         | RPS7         | 7790.790606 | 7987.625213 | 6897.310692 |
| 7449.643884  |              |             |             |             |
| IGSF10       | IGSF10       | 1.171371313 | 0           | 0.892855753 |
| PES1         | PES1         | 5637.810132 | 8006.921447 | 6363.382952 |
| 5706.491322  |              |             |             |             |
| PPP2R5D      | PPP2R5D      | 8551.010588 | 8931.109488 | 4863.385287 |
| 5922.38204   |              |             |             |             |
| SYCE3        | SYCE3        | 3.51411394  | 6.093547524 | 11.60712479 |
| 8.484788022  |              |             |             |             |
| ENTPD6       | ENTPD6       | 1765.256569 | 2500.385667 | 2752.674287 |
| 2582.203821  |              |             |             |             |
| LAMA4        | LAMA4        | 0           | 0           | 6.599279573 |
| GNG12        | GNG12        | 18.74194102 | 43.67042392 | 8.035701777 |
| 18.85508449  |              |             |             |             |
| TRMT61A      | TRMT61A      | 1388.075006 | 1998.683588 | 2051.78252  |
| 1955.272262  |              |             |             |             |
| ZNF354B      | ZNF354B      | 149.9355281 | 91.40321286 | 312.4995136 |
| 416.6973673  |              |             |             |             |
| PKHD1L1      | PKHD1L1      | 1.171371313 | 2.031182508 | 7.142846024 |
| 1.885508449  |              |             |             |             |
| TATDN1       | TATDN1       | 1068.290638 | 984.1079252 | 1407.140667 |
| 1450.898752  |              |             |             |             |
| DEFB131      | DEFB131      | 0           | 0           | 0.942754225 |
| ELAVL4       | ELAVL4       | 0           | 0.892855753 | 0           |
| PGPEP1       | PGPEP1       | 531.8025763 | 536.2321821 | 471.4278376 |
| 510.9727898  |              |             |             |             |
| LPIN3        | LPIN3        | 10.54234182 | 5.07795627  | 6.249990271 |
| 25.45436407  |              |             |             |             |
| ADAMTS6      | ADAMTS6      | 11.71371313 | 12.18709505 | 21.42853807 |
| 10.37029647  |              |             |             |             |
| TMED7        | TMED7        | 3531.68451  | 2995.994199 | 4498.207284 |
| 4075.526513  |              |             |             |             |
| ESAM         | ESAM         | 12.88508445 | 5.07795627  | 115.1783921 |
| 26.39711829  |              |             |             |             |
| STK40        | STK40        | 6791.610875 | 7980.516074 | 4977.670823 |
| 5731.002932  |              |             |             |             |
| RNF26        | RNF26        | 5268.828168 | 5787.854557 | 3468.744601 |
| 4165.088165  |              |             |             |             |
| TSPAN7       | TSPAN7       | 7.028227881 | 12.18709505 | 24.99996108 |
| 21.68334717  |              |             |             |             |
| CEP95        | CEP95        | 1337.70604  | 1003.404159 | 2306.24641  |
| 1751.63735   |              |             |             |             |
| LRRC16B      | LRRC16B      | 44.51210991 | 22.34300759 | 26.78567259 |
| 2.828262674  |              |             |             |             |
| UBE2E2       | UBE2E2       | 162.8206126 | 265.0693173 | 425.8921942 |
| 349.7618174  |              |             |             |             |
| INSIG1       | INSIG1       | 12373.19518 | 8981.889051 | 6387.490057 |
| 8151.995781  |              |             |             |             |
| LOC101927314 | LOC101927314 |             | 3.51411394  | 2.031182508 |
| 6.249990271  | 0            |             |             |             |



|             |             |             |             |             |             |
|-------------|-------------|-------------|-------------|-------------|-------------|
| IGFBP7      | IGFBP7      | 320.9557399 | 229.5236234 | 205.3568232 |             |
| 330.9067329 |             |             |             |             |             |
| DNAJC9      | DNAJC9      | 10364.29338 | 12700.98422 | 7418.738452 |             |
| 7808.833243 |             |             |             |             |             |
| ARHGAP30    | ARHGAP30    |             | 24615.19678 | 23122.98167 |             |
| 11707.12463 | 16483.11486 |             |             |             |             |
| TMC04       | TMC04       | 1179.570913 | 1274.567024 | 1063.391202 |             |
| 1357.566084 |             |             |             |             |             |
| ITGB8       | ITGB8       | 32.79839678 | 36.56128515 | 6.249990271 |             |
| 80.1341091  |             |             |             |             |             |
| KAZN        | KAZN        | 22.25605496 | 10.15591254 | 0           | 14.14131337 |
| MOV10       | MOV10       | 6352.346633 | 5959.489479 | 7863.380617 |             |
| 8469.703955 |             |             |             |             |             |
| SMIM3       | SMIM3       | 824.6454047 | 1697.052986 | 957.1413672 |             |
| 1107.736214 |             |             |             |             |             |
| ZNF833P     | ZNF833P     | 3.51411394  | 4.062365016 | 0           | 10.37029647 |
| LINC00861   | LINC00861   |             | 846.9014596 | 363.581669  |             |
| 1732.140161 | 1629.0793   |             |             |             |             |
| THRSP       | THRSP       | 9.370970508 | 9.140321286 | 12.49998054 |             |
| 34.88190631 |             |             |             |             |             |
| EIF2B1      | EIF2B1      | 6743.584652 | 9878.656128 | 5493.741448 |             |
| 6041.169072 |             |             |             |             |             |
| CHUK        | CHUK        | 4937.330086 | 4534.614949 | 3902.672496 |             |
| 4066.098971 |             |             |             |             |             |
| THOP1       | THOP1       | 5087.265614 | 6595.249604 | 3573.208724 |             |
| 3336.407201 |             |             |             |             |             |
| MBOAT7      | MBOAT7      | 2171.722415 | 2232.269576 | 1702.675921 |             |
| 1645.106122 |             |             |             |             |             |
| FBX027      | FBX027      | 0           | 198.0402945 | 74.1070275  | 12.25580492 |
| PGK1        | PGK1        | 52216.21904 | 71024.35876 | 44569.57348 |             |
| 51003.94631 |             |             |             |             |             |
| SAP30       | SAP30       | 959.3531057 | 1336.51809  | 664.2846803 |             |
| 645.7866439 |             |             |             |             |             |
| MITD1       | MITD1       | 2483.307185 | 2324.688381 | 3292.852017 |             |
| 3361.861565 |             |             |             |             |             |
| ZNF708      | ZNF708      | 725.078843  | 638.8068988 | 1309.81939  |             |
| 1090.766638 |             |             |             |             |             |
| EXOSC1      | EXOSC1      | 2943.656111 | 3389.028015 | 3041.066695 |             |
| 2916.881571 |             |             |             |             |             |
| ATP1A1-AS1  | ATP1A1-AS1  |             | 1475.927855 | 1221.756279 |             |
| 1361.605023 | 1518.777056 |             |             |             |             |
| RNU5D-1     | RNU5D-1     | 0           | 0           | 0.942754225 |             |
| RNU5F-1     | RNU5F-1     | 2.342742627 | 1.015591254 | 0           | 0           |
| SNORD44     | SNORD44     | 25.7701689  | 23.35859884 | 60.71419121 |             |
| 74.47758375 |             |             |             |             |             |
| DUSP27      | DUSP27      | 9.370970508 | 0           | 0           | 0           |
| UBE2QL1     | UBE2QL1     | 4.685485254 | 3.046773762 | 0.892855753 | 0           |
| PLA1A       | PLA1A       | 2.342742627 | 1.015591254 | 16.96425931 |             |
| 10.37029647 |             |             |             |             |             |
| C7orf61     | C7orf61     | 15.22782708 | 23.35859884 | 28.5713841  |             |

|             |          |             |             |             |
|-------------|----------|-------------|-------------|-------------|
| 16.96957604 |          |             |             |             |
| RIOK1       | RIOK1    | 2803.091553 | 3493.633914 | 3415.173255 |
| 3082.806315 |          |             |             |             |
| MARVELD1    | MARVELD1 |             | 79.65324932 | 89.37203036 |
| 138.3926417 |          | 78.24860065 |             |             |
| IL17C       | IL17C    | 0           | 1.015591254 | 1.785711506 |
| CHRAC1      | CHRAC1   | 2869.859718 | 2487.182981 | 2539.281762 |
| 2657.624159 |          |             |             |             |
| POLE3       | POLE3    | 9137.867616 | 12732.46755 | 8743.736389 |
| 8397.11188  |          |             |             |             |
| GSAP        | GSAP     | 224.9032922 | 248.8198572 | 245.5353321 |
| 364.845885  |          |             |             |             |
| DNAJC2      | DNAJC2   | 1616.492413 | 1862.59436  | 1878.568504 |
| 2163.620946 |          |             |             |             |
| LYRM1       | LYRM1    | 1436.10123  | 1584.322356 | 1918.747013 |
| 1845.912772 |          |             |             |             |
| MED15       | MED15    | 6394.516    | 5540.050291 | 5948.205027 |
| 5606.559374 |          |             |             |             |
| SMAD1       | SMAD1    | 442.7783565 | 294.5214637 | 118.7498152 |
| 195.1501245 |          |             |             |             |
| FOXN3       | FOXN3    | 3302.095733 | 4022.756957 | 2684.817249 |
| 3590.008088 |          |             |             |             |
| SPINT1      | SPINT1   | 112.4516461 | 223.4300759 | 416.9636367 |
| 367.6741476 |          |             |             |             |
| CA9         | CA9      | 1.171371313 | 2.031182508 | 15.1785478  |
| 2.828262674 |          |             |             |             |
| GPR158      | GPR158   | 0           | 0           | 8.035701777 |
| 12.25580492 |          |             |             |             |
| CCDC89      | CCDC89   | 5.856856567 | 0           | 0           |
| 0           |          |             |             |             |
| PARD6G      | PARD6G   | 172.1915831 | 81.24730032 | 48.21421066 |
| 99.93194782 |          |             |             |             |
| PGBD1       | PGBD1    | 98.39519033 | 234.6015797 | 232.1424958 |
| 155.5544471 |          |             |             |             |
| GPN3        | GPN3     | 2692.98265  | 3188.956538 | 2788.388517 |
| 2801.865556 |          |             |             |             |
| KCNK5       | KCNK5    | 1245.167706 | 1303.003579 | 820.534437  |
| 872.9904121 |          |             |             |             |
| DCHS1       | DCHS1    | 24.59879758 | 5.07795627  | 211.6068135 |
| 99.93194782 |          |             |             |             |
| APOE        | APOE     | 2.342742627 | 2.031182508 | 20.53568232 |
| 0.942754225 |          |             |             |             |
| ANKRD53     | ANKRD53  | 0           | 0           | 29.46423985 |
| 9.427542247 |          |             |             |             |
| TMEM81      | TMEM81   | 12.88508445 | 2.031182508 | 49.99992217 |
| 11.3130507  |          |             |             |             |
| DCP1B       | DCP1B    | 1430.244374 | 1914.389514 | 2784.817094 |
| 1896.8215   |          |             |             |             |
| AP2A2       | AP2A2    | 1307.250386 | 434.6730567 | 499.9992217 |
| 590.1641447 |          |             |             |             |
| UGDH-AS1    | UGDH-AS1 |             | 10.54234182 | 15.23386881 |
| 60.71419121 |          | 38.65292321 |             |             |
| PCCA-AS1    | PCCA-AS1 |             | 8.199599194 | 3.046773762 |

|                 |              |             |             |             |             |
|-----------------|--------------|-------------|-------------|-------------|-------------|
| 8.035701777     | 0.942754225  |             |             |             |             |
| MIR4522 MIR4522 | 0            | 1.015591254 | 0           | 0           |             |
| LOC100129617    | LOC100129617 | 0           | 0           | 0           | 4.713771124 |
| MGST1 MGST1     | 7.028227881  | 1.015591254 | 16.96425931 | 0           |             |
| EBPL EBPL       | 1293.19393   | 1547.761071 | 880.3557725 |             |             |
| 625.9888052     |              |             |             |             |             |
| MIR6780B        | MIR6780B     | 10.54234182 | 9.140321286 |             |             |
| 5.357134518     | 7.542033798  |             |             |             |             |
| MIR6845 MIR6845 | 0            | 0           | 0.892855753 | 6.599279573 |             |
| MIR6844 MIR6844 | 0            | 0           | 11.60712479 | 2.828262674 |             |
| MIR6835 MIR6835 | 8.199599194  | 19.29623383 | 12.49998054 |             |             |
| 16.02682182     |              |             |             |             |             |
| LOC101929625    | LOC101929625 | 19.91331233 | 47.73278894 |             |             |
| 139.2854975     | 90.50440557  |             |             |             |             |
| MIR6831 MIR6831 | 5.856856567  | 8.124730032 | 18.74997081 |             |             |
| 8.484788022     |              |             |             |             |             |
| LIN9 LIN9       | 1395.103234  | 1226.834235 | 874.1057822 |             |             |
| 968.2085888     |              |             |             |             |             |
| DHX57 DHX57     | 1541.524649  | 939.42191   | 696.4274874 |             |             |
| 752.3178713     |              |             |             |             |             |
| UBA6 UBA6       | 5911.911019  | 4483.835387 | 3481.244581 |             |             |
| 4624.209472     |              |             |             |             |             |
| MAGI2 MAGI2     | 0            | 0           | 5.357134518 | 0.942754225 |             |
| ASB2 ASB2       | 17185.18854  | 24306.14548 | 3438.387505 |             |             |
| 7029.175499     |              |             |             |             |             |
| STK17A STK17A   | 11099.91457  | 10277.78349 | 12164.26678 |             |             |
| 11407.32612     |              |             |             |             |             |
| HEPHL1 HEPHL1   | 2.342742627  | 1.015591254 | 0           | 0           |             |
| SKA2 SKA2       | 3382.920353  | 2578.586194 | 1427.676349 |             |             |
| 2083.486837     |              |             |             |             |             |
| MLF1 MLF1       | 22.25605496  | 44.68601518 | 127.6783727 |             |             |
| 58.45076193     |              |             |             |             |             |
| LIMD1 LIMD1     | 2432.938218  | 1178.085855 | 1174.998171 |             |             |
| 1283.0885       |              |             |             |             |             |
| TTYH2 TTYH2     | 1054.234182  | 1373.079375 | 232.1424958 |             |             |
| 191.3791076     |              |             |             |             |             |
| PCNA PCNA       | 23229.46452  | 27480.88374 | 18634.79242 |             |             |
| 16349.24377     |              |             |             |             |             |
| CASC1 CASC1     | 29.28428284  | 6.093547524 | 38.39279738 |             |             |
| 57.50800771     |              |             |             |             |             |
| FURIN FURIN     | 47362.05632  | 35423.82294 | 7958.023327 |             |             |
| 24229.72633     |              |             |             |             |             |
| PRDX6 PRDX6     | 5312.168907  | 6584.0781   | 6032.133467 |             |             |
| 5418.008529     |              |             |             |             |             |
| PVRL2 PVRL2     | 1.171371313  | 1.015591254 | 67.85703723 |             |             |
| 82.01961755     |              |             |             |             |             |
| SEMA5A SEMA5A   | 0            | 2.031182508 | 49.10706642 | 10.37029647 |             |
| NDUFA7 NDUFA7   | 4047.087888  | 3753.625275 | 2138.389529 |             |             |
| 2570.890771     |              |             |             |             |             |
| APOBEC3B        | APOBEC3B     | 2272.460348 | 3050.836127 |             |             |

|               |               |             |             |             |             |
|---------------|---------------|-------------|-------------|-------------|-------------|
| 1274.10516    |               | 948.4107501 |             |             |             |
| GNG7          | GNG7          | 17.5705697  | 8.124730032 | 103.5712674 |             |
| 110.3022443   |               |             |             |             |             |
| FHAD1         | FHAD1         | 0           | 4.062365016 | 0           | 5.656525348 |
| SLK           | SLK           | 4109.170568 | 4148.690273 | 3942.851005 |             |
| 4480.91083    |               |             |             |             |             |
| PCDHGA2       | PCDHGA2       | 0           | 14.21827756 | 9.821413283 | 12.25580492 |
| C1QTNF2       | C1QTNF2       | 0           | 0           | 0.942754225 |             |
| ARHGAP25      | ARHGAP25      |             | 8665.804977 | 9630.851862 |             |
| 10582.12638   |               | 10630.49664 |             |             |             |
| RTN3          | RTN3          | 4687.827996 | 5898.554004 | 3986.600937 |             |
| 3750.276306   |               |             |             |             |             |
| LOC101927239  | LOC101927239  | 0           | 0           | 1.785711506 |             |
| 3.771016899   |               |             |             |             |             |
| BTBD19        | BTBD19        | 62.08267961 | 69.06020528 | 82.14272928 |             |
| 53.73699081   |               |             |             |             |             |
| CDC7          | CDC7          | 2649.641911 | 1680.803525 | 891.0700415 |             |
| 1647.934385   |               |             |             |             |             |
| RIPK4         | RIPK4         | 5.856856567 | 17.26505132 | 46.42849916 |             |
| 50.90872813   |               |             |             |             |             |
| KIF1B         | KIF1B         | 1806.254565 | 1941.810478 | 1591.961808 |             |
| 1198.24062    |               |             |             |             |             |
| SLC16A13      | SLC16A13      |             | 233.1028914 | 955.6713701 |             |
| 363.3922915   |               | 162.1537267 |             |             |             |
| FCGR2C        | FCGR2C        | 0           | 0           | 0.942754225 |             |
| TSPAN9        | TSPAN9        | 0           | 1.015591254 | 6.249990271 | 7.542033798 |
| GALK1         | GALK1         | 1680.917835 | 2143.913137 | 1033.034106 |             |
| 1434.87193    |               |             |             |             |             |
| COX7A2        | COX7A2        | 14957.2403  | 14308.66518 | 10265.16259 |             |
| 9979.053469   |               |             |             |             |             |
| AHCY          | AHCY          | 4773.338102 | 6281.431906 | 3373.209035 |             |
| 3788.929229   |               |             |             |             |             |
| CCNT2         | CCNT2         | 2099.097394 | 1524.402472 | 2966.066812 |             |
| 2876.34314    |               |             |             |             |             |
| SFRP4         | SFRP4         | 1.171371313 | 0           | 0           | 0           |
| CILP2         | CILP2         | 4.685485254 | 17.26505132 | 86.60700804 |             |
| 60.33627038   |               |             |             |             |             |
| EZH1          | EZH1          | 1317.792728 | 949.5778225 | 2641.067317 |             |
| 2369.141367   |               |             |             |             |             |
| NDUFC2-KCTD14 | NDUFC2-KCTD14 |             | 6070.046146 | 7669.745151 |             |
| 3855.351142   |               | 4203.741088 |             |             |             |
| ARHGEF9       | ARHGEF9       | 561.0868591 | 468.1875681 | 410.7136464 |             |
| 494.945968    |               |             |             |             |             |
| TLE1          | TLE1          | 131.1935871 | 5.07795627  | 25.89281684 |             |
| 32.99639787   |               |             |             |             |             |
| MMP9          | MMP9          | 0           | 9.140321286 | 178.5711506 | 4.713771124 |
| KCNA2         | KCNA2         | 85.51010588 | 41.63924142 | 6.249990271 |             |
| 10.37029647   |               |             |             |             |             |
| JARID2        | JARID2        | 2986.996849 | 2123.601312 | 1132.141095 |             |
| 2093.857133   |               |             |             |             |             |

|          |          |             |             |             |             |
|----------|----------|-------------|-------------|-------------|-------------|
| TLL1     | TLL1     | 0           | 1.015591254 | 2.678567259 | 0           |
| SMDT1    | SMDT1    | 2246.690179 | 2915.76249  | 2011.604012 |             |
|          |          | 1727.12574  |             |             |             |
| PDZD8    | PDZD8    | 803.560721  | 811.457412  | 946.4270982 |             |
|          |          | 734.4055411 |             |             |             |
| TTC23    | TTC23    | 147.5927855 | 70.07579653 | 47.32135491 |             |
|          |          | 115.9587696 |             |             |             |
| PUS10    | PUS10    | 633.7118806 | 570.7622848 | 344.6423207 |             |
|          |          | 510.9727898 |             |             |             |
| BET1     | BET1     | 1434.929859 | 1347.689594 | 1423.21207  |             |
|          |          | 1493.322692 |             |             |             |
| PRSS16   | PRSS16   | 9.370970508 | 2.031182508 | 29.46423985 |             |
|          |          | 65.99279573 |             |             |             |
| CYB5D2   | CYB5D2   | 507.2037787 | 702.7891478 | 837.4986963 |             |
|          |          | 683.4968129 |             |             |             |
| COL25A1  | COL25A1  | 0           | 2.031182508 | 26.78567259 | 3.771016899 |
| NOXA1    | NOXA1    | 12.88508445 | 5.07795627  | 11.60712479 |             |
|          |          | 83.905126   |             |             |             |
| ENG      | ENG      | 1245.167706 | 1347.689594 | 1243.748064 |             |
|          |          | 1263.290661 |             |             |             |
| IL17RE   | IL17RE   | 9.370970508 | 4.062365016 | 40.17850889 |             |
|          |          | 38.65292321 |             |             |             |
| GTF2H2   | GTF2H2   | 343.2117948 | 679.430549  | 523.2134713 |             |
|          |          | 474.205375  |             |             |             |
| TBPL1    | TBPL1    | 1104.603149 | 1195.350906 | 1633.033172 |             |
|          |          | 1482.009641 |             |             |             |
| SYP      | SYP      | 91.36696245 | 52.81074521 | 116.9641036 |             |
|          |          | 54.67974503 |             |             |             |
| PFN1     | PFN1     | 170276.391  | 238968.6221 | 80917.73119 |             |
|          |          | 96301.4013  |             |             |             |
| LIPE     | LIPE     | 459.1775549 | 248.8198572 | 209.821102  |             |
|          |          | 279.9980047 |             |             |             |
| RAD51AP1 | RAD51AP1 |             | 1781.655768 | 1555.885801 |             |
|          |          | 715.1774582 | 1345.310279 |             |             |
| DTHD1    | DTHD1    | 8.199599194 | 1.015591254 | 1.785711506 |             |
|          |          | 34.88190631 |             |             |             |
| CD86     | CD86     | 1103.431777 | 854.1122447 | 146.4283435 |             |
|          |          | 308.2806315 |             |             |             |
| PPP1R3F  | PPP1R3F  | 347.8972801 | 371.706399  | 486.6063854 |             |
|          |          | 421.4111384 |             |             |             |
| PNLIP    | PNLIP    | 0           | 4.062365016 | 1.785711506 | 0           |
| SEPW1    | SEPW1    | 3218.928369 | 3995.335993 | 2169.63948  |             |
|          |          | 2425.70662  |             |             |             |
| GPATCH2  | GPATCH2  | 524.7743484 | 484.4370282 | 564.2848359 |             |
|          |          | 516.6293151 |             |             |             |
| PDP2     | PDP2     | 843.3873457 | 624.5886212 | 662.4989687 |             |
|          |          | 907.8723184 |             |             |             |
| USP32    | USP32    | 1450.157686 | 746.4595717 | 842.8558309 |             |
|          |          | 1041.743418 |             |             |             |
| FAM124A  | FAM124A  | 2.342742627 | 14.21827756 | 16.07140355 |             |

|             |             |             |             |             |   |
|-------------|-------------|-------------|-------------|-------------|---|
| 13.19855915 |             |             |             |             |   |
| EDA2R       | EDA2R       | 148.7641568 | 337.1762963 | 310.7138021 |   |
| 90.50440557 |             |             |             |             |   |
| PITRM1      | PITRM1      | 6815.038302 | 8378.627846 | 5677.669734 |   |
| 7635.366466 |             |             |             |             |   |
| DHX33       | DHX33       | 465.0344114 | 272.1784561 | 269.6424374 |   |
| 353.5328343 |             |             |             |             |   |
| LINC01137   | LINC01137   |             | 169.8488405 | 242.7263097 |   |
| 292.856687  | 307.3378773 |             |             |             |   |
| PHLDA2      | PHLDA2      | 46.85485254 | 56.87311023 | 121.4283824 |   |
| 180.0660569 |             |             |             |             |   |
| KLHL33      | KLHL33      | 0           | 2.678567259 | 0           |   |
| SMPD2       | SMPD2       | 703.9941594 | 1151.680482 | 905.3557336 |   |
| 630.7025763 |             |             |             |             |   |
| DNAAF2      | DNAAF2      | 1658.66178  | 2023.057778 | 2021.425425 |   |
| 1992.982431 |             |             |             |             |   |
| VPS37B      | VPS37B      | 1382.21815  | 1427.921303 | 1574.997548 |   |
| 1316.084898 |             |             |             |             |   |
| MAN1A2      | MAN1A2      | 2122.52482  | 1631.039554 | 1751.782987 |   |
| 2499.24145  |             |             |             |             |   |
| GL01        | GL01        | 12844.08645 | 14219.29315 | 7677.66662  |   |
| 11632.64438 |             |             |             |             |   |
| GAL3ST1     | GAL3ST1     | 0           | 48.21421066 | 37.71016899 |   |
| TM6SF1      | TM6SF1      | 529.4598337 | 446.8601518 | 108.0355461 |   |
| 128.2145746 |             |             |             |             |   |
| COR01A      | COR01A      | 110315.0648 | 130224.1886 | 38137.44063 |   |
| 57862.4833  |             |             |             |             |   |
| RPL36       | RPL36       | 10818.78545 | 12210.45365 | 12208.01671 |   |
| 10841.67358 |             |             |             |             |   |
| HEXIM2      | HEXIM2      | 261.2158029 | 302.6461937 | 256.2496011 |   |
| 259.2574118 |             |             |             |             |   |
| ZNF782      | ZNF782      | 194.447638  | 167.5725569 | 361.60658   |   |
| 233.8030477 |             |             |             |             |   |
| ZNF425      | ZNF425      | 94.88107639 | 120.8553592 | 172.3211603 |   |
| 112.1877527 |             |             |             |             |   |
| GLE1        | GLE1        | 6994.258113 | 8767.599296 | 6876.77501  |   |
| 6539.886057 |             |             |             |             |   |
| PPP1R16B    | PPP1R16B    |             | 24899.84001 | 12139.36226 |   |
| 9916.948849 | 15476.25335 |             |             |             |   |
| C9orf172    | C9orf172    |             | 45.68348122 | 16.24946006 |   |
| 32.14280711 | 19.79783872 |             |             |             |   |
| TTLL5       | TTLL5       | 1754.714228 | 1949.935208 | 1385.712129 |   |
| 1285.916763 |             |             |             |             |   |
| TDRD7       | TDRD7       | 1337.70604  | 2420.153958 | 3443.744639 |   |
| 2717.017676 |             |             |             |             |   |
| CSNK1G1     | CSNK1G1     | 2840.575435 | 2328.750746 | 2283.925016 |   |
| 2705.704625 |             |             |             |             |   |
| ITPA        | ITPA        | 3238.841682 | 3128.021062 | 1997.31832  |   |
| 2538.837127 |             |             |             |             |   |
| NEUROD2     | NEUROD2     | 1.171371313 | 1.015591254 | 1.785711506 | 0 |

|             |             |             |             |             |
|-------------|-------------|-------------|-------------|-------------|
| C11orf94    | C11orf94    | 8.199599194 | 2.031182508 | 0           |
|             | 0.942754225 |             |             |             |
| TBCE        | TBCE        | 1533.325049 | 2204.848613 | 1666.961691 |
| 1120.934773 |             |             |             |             |
| INPP5K      | INPP5K      | 4158.368163 | 6284.47868  | 6311.597318 |
| 4797.67625  |             |             |             |             |
| BANP        | BANP        | 995.6656164 | 1681.819117 | 1508.033367 |
| 1393.390744 |             |             |             |             |
| PTPRA       | PTPRA       | 6111.044142 | 6196.122241 | 5528.562823 |
| 4834.443664 |             |             |             |             |
| PRKCD       | PRKCD       | 2151.809103 | 3562.694119 | 4471.421611 |
| 3318.494871 |             |             |             |             |
| RFTN2       | RFTN2       | 3.51411394  | 5.07795627  | 22.32139383 |
| 7.542033798 |             |             |             |             |
| TMEM125     | TMEM125     | 0           | 2.031182508 | 16.96425931 |
|             |             |             |             | 0           |
| ZNF333      | ZNF333      | 514.2320066 | 562.6375547 | 1920.532725 |
| 1359.451592 |             |             |             |             |
| ALOX5       | ALOX5       | 16.39919839 | 26.40537261 | 307.142379  |
| 95.2181767  |             |             |             |             |
| LINCR-0002  | LINCR-0002  | 0           | 0           | 2.678567259 |
|             |             |             |             | 0           |
| DDX54       | DDX54       | 4082.229027 | 5255.68474  | 5328.563134 |
| 4988.112603 |             |             |             |             |
| BCAS4       | BCAS4       | 361.9537359 | 477.3278894 | 1038.391241 |
| 635.4163475 |             |             |             |             |
| ABT1        | ABT1        | 5422.27781  | 7628.105909 | 6447.311393 |
| 5893.156659 |             |             |             |             |
| RGL4        | RGL4        | 1277.966103 | 1150.664891 | 707.1417564 |
| 790.9707945 |             |             |             |             |
| SDR16C5     | SDR16C5     | 0           | 1.015591254 | 0           |
|             |             |             |             | 0           |
| FAM171B     | FAM171B     | 38.65525334 | 7.109138778 | 0           |
|             |             |             |             | 9.427542247 |
| CFAP58      | CFAP58      | 26.94154021 | 15.23386881 | 4.464278765 |
| 1.885508449 |             |             |             |             |
| C8orf37     | C8orf37     | 84.33873457 | 78.20052656 | 150.8926223 |
| 156.4972013 |             |             |             |             |
| MPP4        | MPP4        | 1.171371313 | 0           | 0           |
|             |             |             | 0           | 0           |
| RNF13       | RNF13       | 2732.809274 | 3258.016743 | 4033.029436 |
| 3779.501687 |             |             |             |             |
| CYP26C1     | CYP26C1     | 0           | 0           | 4.464278765 |
|             |             |             |             | 0           |
| SNX12       | SNX12       | 98.39519033 | 141.1671843 | 76.78559476 |
| 88.61889712 |             |             |             |             |
| MGC70870    | MGC70870    |             | 679.3953618 | 611.3859349 |
| 890.1771858 | 597.7061785 |             |             |             |
| GDAP1       | GDAP1       | 1440.786716 | 1759.004052 | 896.427176  |
| 790.9707945 |             |             |             |             |
| NUF2        | NUF2        | 2756.236701 | 2599.91361  | 934.8199734 |
| 1383.020448 |             |             |             |             |
| MECOM       | MECOM       | 4.685485254 | 5.07795627  | 0           |
|             |             |             |             | 0           |
| TMEM236     | TMEM236     | 1.171371313 | 0           | 0.892855753 |
|             |             |             |             | 0.942754225 |
| LRRC16A     | LRRC16A     | 260.0444316 | 451.9381081 | 524.9991828 |
| 318.650928  |             |             |             |             |

|              |              |             |             |             |             |
|--------------|--------------|-------------|-------------|-------------|-------------|
| IFI44        | IFI44        | 2722.266932 | 1910.327149 | 7818.737829 |             |
| 5439.691877  |              |             |             |             |             |
| ZNF563       | ZNF563       | 247.1593471 | 277.2564124 | 873.2129265 |             |
| 878.6469374  |              |             |             |             |             |
| UBXN2A       | UBXN2A       | 945.29665   | 1186.210585 | 986.6056071 |             |
| 993.6629528  |              |             |             |             |             |
| MIR3909      | MIR3909      | 0           | 2.031182508 | 0           | 1.885508449 |
| LINC00565    | LINC00565    |             | 7.028227881 | 0           | 8.92855753  |
| 5.656525348  |              |             |             |             |             |
| RAB4A        | RAB4A        | 1723.087202 | 1454.326676 | 1069.641192 |             |
| 1233.122526  |              |             |             |             |             |
| MIR5193      | MIR5193      | 420.5223015 | 387.955859  | 368.749426  |             |
| 477.0336377  |              |             |             |             |             |
| P4HA2-AS1    | P4HA2-AS1    |             | 78.481878   | 95.46557788 |             |
| 29.46423985  | 64.10728728  |             |             |             |             |
| PAF1         | PAF1         | 3722.618034 | 4926.633173 | 4616.064243 |             |
| 3924.685837  |              |             |             |             |             |
| LINC00433    | LINC00433    |             | 0           | 0           | 0.892855753 |
| LINC00423    | LINC00423    |             | 0           | 2.031182508 | 0           |
| 2.828262674  |              |             |             |             |             |
| NDFIP2-AS1   | NDFIP2-AS1   |             | 7.028227881 | 12.18709505 |             |
| 6.249990271  | 6.599279573  |             |             |             |             |
| LOC100506325 | LOC100506325 |             | 91.36696245 | 48.74838019 |             |
| 94.64270982  | 89.56165135  |             |             |             |             |
| C18orf61     | C18orf61     |             | 1.171371313 | 1.015591254 |             |
| 1.785711506  | 0            |             |             |             |             |
| CPE          | CPE          | 55.05445173 | 70.07579653 | 0           | 0           |
| DNAH2        | DNAH2        | 1.171371313 | 4.062365016 | 4.464278765 |             |
| 16.96957604  |              |             |             |             |             |
| ZBTB22       | ZBTB22       | 9.370970508 | 0           | 0           | 12.25580492 |
| CNBP         | CNBP         | 26134.46537 | 34808.37464 | 46674.92735 |             |
| 41255.86763  |              |             |             |             |             |
| C14orf28     | C14orf28     |             | 131.1935871 | 139.1360018 |             |
| 474.9992606  | 364.845885   |             |             |             |             |
| PUS3         | PUS3         | 1075.318866 | 1091.760598 | 1163.391046 |             |
| 1366.050872  |              |             |             |             |             |
| SLC39A1      | SLC39A1      | 6850.179441 | 7515.37528  | 5253.563251 |             |
| 5421.779546  |              |             |             |             |             |
| RMND1        | RMND1        | 1063.605153 | 1556.901392 | 1264.283746 |             |
| 1029.487613  |              |             |             |             |             |
| GTPBP10      | GTPBP10      | 1037.834984 | 891.6891211 | 1566.068991 |             |
| 1270.832695  |              |             |             |             |             |
| MIR4723      | MIR4723      | 14.05645576 | 26.40537261 | 44.64278765 |             |
| 23.56885562  |              |             |             |             |             |
| C1orf226     | C1orf226     |             | 0           | 2.031182508 | 63.39275847 |
| 6.599279573  |              |             |             |             |             |
| CCDC168      | CCDC168      | 22.25605496 | 24.3741901  | 106.2498346 |             |
| 1.885508449  |              |             |             |             |             |
| MNAT1        | MNAT1        | 1121.002347 | 1305.034761 | 714.2846024 |             |
| 941.8114705  |              |             |             |             |             |



|             |             |             |             |             |             |
|-------------|-------------|-------------|-------------|-------------|-------------|
| CASQ1       | CASQ1       | 0           | 1.015591254 | 16.07140355 | 13.19855915 |
| AP1AR       | AP1AR       | 1740.657772 | 1957.044347 | 3366.066189 |             |
| 2857.488055 |             |             |             |             |             |
| QTRT1       | QTRT1       | 1895.278785 | 1802.674476 | 1622.318903 |             |
| 1992.039677 |             |             |             |             |             |
| ANKRD13C    | ANKRD13C    |             | 3045.565415 | 3441.83876  |             |
| 3430.351803 | 2942.335935 |             |             |             |             |
| DLEU7-AS1   | DLEU7-AS1   |             | 1.171371313 | 0           | 4.464278765 |
| 8.484788022 |             |             |             |             |             |
| DENND5B-AS1 | DENND5B-AS1 | 0           | 1.015591254 | 0.892855753 |             |
| 0           |             |             |             |             |             |
| TMEM68      | TMEM68      | 1325.992327 | 1170.976716 | 963.3913575 |             |
| 1168.072484 |             |             |             |             |             |
| RNGTT       | RNGTT       | 3126.390036 | 2708.581875 | 1948.211253 |             |
| 2892.369961 |             |             |             |             |             |
| ZDHHC20     | ZDHHC20     | 5334.424961 | 2976.697966 | 2370.532024 |             |
| 3277.956439 |             |             |             |             |             |
| HUS1B       | HUS1B       | 19.91331233 | 37.5768764  | 21.42853807 |             |
| 13.19855915 |             |             |             |             |             |
| CCDC110     | CCDC110     | 0           | 0           | 51.78563368 | 10.37029647 |
| KIF25       | KIF25       | 0           | 1.015591254 | 0.892855753 | 6.599279573 |
| RRNAD1      | RRNAD1      | 795.3611218 | 587.0117448 | 566.0705474 |             |
| 496.8314764 |             |             |             |             |             |
| EIF1AX-AS1  | EIF1AX-AS1  |             | 7.028227881 | 27.42096386 |             |
| 31.24995136 | 7.542033798 |             |             |             |             |
| CENPA       | CENPA       | 3058.450499 | 3181.847399 | 866.0700804 |             |
| 1626.251038 |             |             |             |             |             |
| PTPRS       | PTPRS       | 3.51411394  | 6.093547524 | 24.99996108 |             |
| 13.19855915 |             |             |             |             |             |
| SMIM24      | SMIM24      | 2.342742627 | 15.23386881 | 0           | 5.656525348 |
| C19orf38    | C19orf38    |             | 83.16736326 | 125.9333155 |             |
| 44.64278765 | 47.13771124 |             |             |             |             |
| APBA1       | APBA1       | 1265.081019 | 921.1412674 | 64.28561422 |             |
| 76.3630922  |             |             |             |             |             |
| CENPC       | CENPC       | 1841.395705 | 1622.914824 | 2932.138293 |             |
| 2326.717427 |             |             |             |             |             |
| FAM78A      | FAM78A      | 2701.182249 | 1445.186355 | 1358.926456 |             |
| 1333.997228 |             |             |             |             |             |
| SEC14L2     | SEC14L2     | 672.3671339 | 451.9381081 | 842.8558309 |             |
| 645.7866439 |             |             |             |             |             |
| KLHL7       | KLHL7       | 1409.15969  | 1686.897073 | 1901.782754 |             |
| 1768.606926 |             |             |             |             |             |
| LOC341056   | LOC341056   |             | 1.171371313 | 1.015591254 | 0           |
| 0.942754225 |             |             |             |             |             |
| JPX         | JPX         | 291.6714571 | 466.1563856 | 560.7134129 |             |
| 330.9067329 |             |             |             |             |             |
| MTRF1       | MTRF1       | 1075.318866 | 816.5353683 | 834.8201291 |             |
| 1070.968799 |             |             |             |             |             |
| ATP6V1H     | ATP6V1H     | 2167.03693  | 2600.929202 | 3303.566286 |             |
| 2498.298695 |             |             |             |             |             |

|              |              |             |             |             |
|--------------|--------------|-------------|-------------|-------------|
| PSENE        | PSENE        | 1843.738447 | 2261.721723 | 1708.033056 |
| 1442.413964  |              |             |             |             |
| BCL7C        | BCL7C        | 1801.56908  | 2666.942633 | 1646.426009 |
| 1481.066887  |              |             |             |             |
| HYAL4        | HYAL4        | 0           | 0           | 13.19855915 |
| ZNF836       | ZNF836       | 260.0444316 | 298.5838287 | 804.4630335 |
| 603.3627038  |              |             |             |             |
| ADH1A        | ADH1A        | 1.171371313 | 0           | 0           |
| TMEM164      | TMEM164      | 202.6472372 | 159.4478269 | 63.39275847 |
| 155.5544471  |              |             |             |             |
| ATP6V1A      | ATP6V1A      | 5932.995703 | 6230.652344 | 3985.708082 |
| 4973.028535  |              |             |             |             |
| RNF146       | RNF146       | 1404.474205 | 994.2638377 | 1816.068602 |
| 1552.716208  |              |             |             |             |
| DSG3         | DSG3         | 0           | 0           | 10.71426904 |
| ZNF318       | ZNF318       | 720.3933578 | 694.6644178 | 808.9273122 |
| 1082.28185   |              |             |             |             |
| PIBF1        | PIBF1        | 705.1655307 | 813.4885945 | 1420.533503 |
| 1492.379938  |              |             |             |             |
| TRAPPC8      | TRAPPC8      | 4045.916517 | 2169.302919 | 2789.281372 |
| 3126.173009  |              |             |             |             |
| AXIN2        | AXIN2        | 57.39719436 | 68.04461402 | 552.6777111 |
| 382.7582152  |              |             |             |             |
| COIL         | COIL         | 1492.327053 | 1602.602999 | 1373.212148 |
| 1780.86273   |              |             |             |             |
| OVOL1        | OVOL1        | 0           | 8.124730032 | 0           |
| DENND2D      | DENND2D      | 4386.785569 | 6031.596458 | 9.427542247 |
| 9367.205977  |              |             |             | 8946.414645 |
| DPY19L1      | DPY19L1      | 1027.292642 | 1142.540161 | 892.855753  |
| 1061.541257  |              |             |             |             |
| LOC100422556 | LOC100422556 |             | 8.199599194 | 3.046773762 |
| 5.357134518  | 10.37029647  |             |             |             |
| HIAT1        | HIAT1        | 7037.598851 | 7483.891951 | 8533.915287 |
| 7660.82083   |              |             |             |             |
| ZMYM3        | ZMYM3        | 331.4980817 | 274.2096386 | 281.2495622 |
| 233.8030477  |              |             |             |             |
| TSHZ1        | TSHZ1        | 217.8750643 | 215.3053459 | 513.392058  |
| 450.6365194  |              |             |             |             |
| CITED2       | CITED2       | 675.8812479 | 479.3590719 | 758.9273901 |
| 469.4916039  |              |             |             |             |
| MT1X         | MT1X         | 2249.032922 | 2164.224962 | 1466.069146 |
| 1726.182985  |              |             |             |             |
| H1FX         | H1FX         | 5346.138675 | 3219.424275 | 4124.993579 |
| 3487.247877  |              |             |             |             |
| DNAAF3       | DNAAF3       | 0           | 2.031182508 | 0           |
| RAB11FIP3    | RAB11FIP3    |             | 832.8450039 | 6.599279573 |
| 591.9633643  | 812.6541417  |             |             | 466.1563856 |
| TNFSF13      | TNFSF13      | 176.8770683 | 428.5795092 | 204.4639674 |
| 228.1465224  |              |             |             |             |
| GFOD1        | GFOD1        | 664.1675347 | 494.5929407 | 528.5706058 |

|                 |                |             |             |             |             |
|-----------------|----------------|-------------|-------------|-------------|-------------|
| 480.8046546     |                |             |             |             |             |
| HOXA10-AS       | HOXA10-AS      | 0           | 0           | 0           | 5.656525348 |
| LINC00854       | LINC00854      | 17.5705697  |             | 10.15591254 |             |
| 49.99992217     | 17.91233027    |             |             |             |             |
| LINC00907       | LINC00907      | 0           | 0           | 3.571423012 |             |
| 0.942754225     |                |             |             |             |             |
| DHX32 DHX32     | 1940.962266    | 1921.498653 |             | 2202.675143 |             |
| 2120.254251     |                |             |             |             |             |
| EP300 EP300     | 5192.689033    | 3248.876422 |             | 3419.637534 |             |
| 3751.21906      |                |             |             |             |             |
| NTN1 NTN1       | 1.171371313    | 1.015591254 |             | 1.785711506 |             |
| 4.713771124     |                |             |             |             |             |
| GDF15 GDF15     | 4.685485254    | 1.015591254 |             | 4.464278765 | 0           |
| NAT14 NAT14     | 257.701689     | 167.5725569 |             | 91.96414256 |             |
| 122.5580492     |                |             |             |             |             |
| BLACAT1 BLACAT1 | 0 0            | 0           | 9.427542247 |             |             |
| ARHGAP19-SLIT1  | ARHGAP19-SLIT1 | 1959.704207 |             | 1740.723409 |             |
| 921.4271371     | 1287.802271    |             |             |             |             |
| LOC100506469    | LOC100506469   | 768.4195816 |             | 979.0299689 |             |
| 1207.140978     | 1011.575283    |             |             |             |             |
| LING04 LING04   | 29.28428284    | 5.07795627  |             | 0           | 17.91233027 |
| ETNK1 ETNK1     | 4566.00538     | 3406.293066 |             | 3402.673275 |             |
| 4298.01651      |                |             |             |             |             |
| LOC101927132    | LOC101927132   | 1.171371313 |             | 1.015591254 |             |
| 0.892855753     | 0              |             |             |             |             |
| LOC101926892    | LOC101926892   | 16.39919839 |             | 0           | 0           |
| 11.3130507      |                |             |             |             |             |
| TP63 TP63       | 206.1613512    | 33.51451138 |             | 1.785711506 |             |
| 124.4435577     |                |             |             |             |             |
| CLCN3 CLCN3     | 2912.029085    | 2439.450192 |             | 2941.06685  |             |
| 2630.284287     |                |             |             |             |             |
| RAB14 RAB14     | 8348.363351    | 7641.308595 |             | 6763.382329 |             |
| 8112.400104     |                |             |             |             |             |
| FCGR2A FCGR2A   | 0 0            | 0           | 1.885508449 |             |             |
| PILRA PILRA     | 9.370970508    | 0           | 45.5356434  | 32.99639787 |             |
| RNF207 RNF207   | 379.5243056    | 226.4768497 |             | 132.1426514 |             |
| 265.8566914     |                |             |             |             |             |
| MOK MOK         | 59.73993699    | 133.0424543 |             | 86.60700804 |             |
| 32.99639787     |                |             |             |             |             |
| C15orf48        | C15orf48       | 0           | 3.046773762 | 77.67845051 |             |
| 31.11088942     |                |             |             |             |             |
| ANKEF1 ANKEF1   | 552.88726      | 587.0117448 |             | 533.0348846 |             |
| 619.3895256     |                |             |             |             |             |
| RPP25 RPP25     | 753.1917546    | 1100.900919 |             | 931.2485504 |             |
| 671.241008      |                |             |             |             |             |
| DUS2 DUS2       | 2421.224505    | 3251.923195 |             | 1757.140122 |             |
| 1726.182985     |                |             |             |             |             |
| ADAT3 ADAT3     | 570.4578297    | 599.1988399 |             | 212.4996692 |             |
| 329.0212244     |                |             |             |             |             |
| SAAL1 SAAL1     | 2196.321213    | 3071.147952 |             | 1532.140472 |             |

|              |              |             |             |             |             |
|--------------|--------------|-------------|-------------|-------------|-------------|
| 1661.132944  |              |             |             |             |             |
| IP05         | IP05         | 10632.53741 | 10153.88136 | 7631.238121 |             |
| 8022.838452  |              |             |             |             |             |
| SPRYD3       | SPRYD3       | 3120.533179 | 3645.972602 | 4318.743277 |             |
| 4205.626596  |              |             |             |             |             |
| GALP         | GALP         | 0           | 1.015591254 | 0           | 0           |
| LOC101928069 | LOC101928069 |             | 130.0222158 | 203.1182508 |             |
| 205.3568232  |              | 145.1841506 |             |             |             |
| LOC102723895 | LOC102723895 | 0           | 2.031182508 | 0           |             |
| 3.771016899  |              |             |             |             |             |
| YPEL1        | YPEL1        | 1199.484225 | 1152.696073 | 892.855753  |             |
| 828.6809635  |              |             |             |             |             |
| SPTSSA       | SPTSSA       | 2545.389864 | 1578.228809 | 1112.498268 |             |
| 1008.74702   |              |             |             |             |             |
| MCM7         | MCM7         | 39634.51976 | 52997.614   | 22389.25086 |             |
| 27440.74722  |              |             |             |             |             |
| PCY0X1L      | PCY0X1L      | 1832.024734 | 2945.214637 | 1555.354722 |             |
| 1440.528455  |              |             |             |             |             |
| SMIM7        | SMIM7        | 2797.234697 | 3183.878581 | 2534.817483 |             |
| 2346.515265  |              |             |             |             |             |
| MRPS34       | MRPS34       | 5266.485425 | 8511.6703   | 4491.064438 |             |
| 4342.325959  |              |             |             |             |             |
| CHST5        | CHST5        | 0           | 3.046773762 | 0           | 2.828262674 |
| FAM46C       | FAM46C       | 4789.737301 | 2639.521669 | 1508.033367 |             |
| 2100.456413  |              |             |             |             |             |
| WDR55        | WDR55        | 3182.615859 | 4110.097805 | 3339.280516 |             |
| 3391.086946  |              |             |             |             |             |
| TMPRSS11E    | TMPRSS11E    |             | 0           | 2.031182508 | 0           |
| FAM84B       | FAM84B       | 405.2944745 | 245.7730835 | 1677.67596  |             |
| 1165.244222  |              |             |             |             |             |
| TCTE3        | TCTE3        | 8.199599194 | 13.2026863  | 9.821413283 |             |
| 11.3130507   |              |             |             |             |             |
| LRCH3        | LRCH3        | 1970.246549 | 1838.22017  | 1985.711195 |             |
| 2009.952007  |              |             |             |             |             |
| TRIM52       | TRIM52       | 778.9619235 | 668.2590452 | 1599.997509 |             |
| 1364.165363  |              |             |             |             |             |
| STIM2        | STIM2        | 2674.240709 | 2665.927042 | 2768.74569  |             |
| 3277.013685  |              |             |             |             |             |
| ZNF496       | ZNF496       | 260.0444316 | 448.8913343 | 855.3558114 |             |
| 577.9083398  |              |             |             |             |             |
| PYROXD2      | PYROXD2      | 62.08267961 | 85.30966534 | 49.99992217 |             |
| 98.9891936   |              |             |             |             |             |
| ACTA2-AS1    | ACTA2-AS1    |             | 524.7743484 | 608.3391612 |             |
| 933.9271177  | 700.466389   |             |             |             |             |
| MRPS31       | MRPS31       | 1976.103406 | 2049.463151 | 1716.068757 |             |
| 2142.880353  |              |             |             |             |             |
| SNORD116-6   | SNORD116-6   |             | 1.171371313 | 0           | 1.785711506 |
| 0.942754225  |              |             |             |             |             |
| SNORD116-5   | SNORD116-5   |             | 0           | 1.015591254 | 0.892855753 |
| 0            |              |             |             |             |             |

|             |             |             |             |             |             |
|-------------|-------------|-------------|-------------|-------------|-------------|
| FAM81A      | FAM81A      | 28.11291152 | 90.38762161 | 0           | 20.74059294 |
| ZNF417      | ZNF417      | 339.6976809 | 289.4435074 | 646.4275652 |             |
| 651.4431693 |             |             |             |             |             |
| C12orf66    | C12orf66    |             | 408.8085884 | 532.1698171 |             |
| 780.3559281 | 650.5004151 |             |             |             |             |
| RPLP1       | RPLP1       | 27222.66932 | 26134.20974 | 32258.87836 |             |
| 28474.00585 |             |             |             |             |             |
| B3GALNT2    | B3GALNT2    |             | 1727.772687 | 1842.282535 |             |
| 1649.997432 | 1363.222609 |             |             |             |             |
| CACTIN-AS1  | CACTIN-AS1  |             | 821.1312907 | 922.1568587 |             |
| 927.6771274 | 708.951177  |             |             |             |             |
| LINC00648   | LINC00648   |             | 0           | 0.892855753 | 0           |
| DYNLL1-AS1  | DYNLL1-AS1  |             | 324.4698538 | 414.3612317 |             |
| 269.6424374 | 209.2914379 |             |             |             |             |
| LOC643441   | LOC643441   |             | 0           | 0.892855753 | 0           |
| LUC7L3      | LUC7L3      | 2654.327396 | 1923.529835 | 2936.602572 |             |
| 3241.189025 |             |             |             |             |             |
| GTSE1       | GTSE1       | 3812.813625 | 3981.117716 | 1116.069691 |             |
| 1877.023661 |             |             |             |             |             |
| EEDP1       | EEDP1       | 367.8105924 | 272.1784561 | 233.9282073 |             |
| 109.3594901 |             |             |             |             |             |
| SERTAD2     | SERTAD2     | 1082.347094 | 797.2391344 | 1657.140278 |             |
| 1386.791465 |             |             |             |             |             |
| PIP5K1B     | PIP5K1B     | 543.5162894 | 742.3972067 | 16.96425931 |             |
| 174.4095316 |             |             |             |             |             |
| VBP1        | VBP1        | 6597.163237 | 6283.463089 | 4538.385793 |             |
| 5667.838399 |             |             |             |             |             |
| SRCAP       | SRCAP       | 5278.199138 | 2761.39262  | 3637.494338 |             |
| 4187.714266 |             |             |             |             |             |
| PPP2R2D     | PPP2R2D     | 1656.319037 | 1846.3449   | 2289.282151 |             |
| 1874.195399 |             |             |             |             |             |
| SERPINB6    | SERPINB6    |             | 350.2400227 | 376.7843553 |             |
| 2891.959784 | 2626.51327  |             |             |             |             |
| TMCC2       | TMCC2       | 200.3044946 | 115.777403  | 164.2854586 |             |
| 181.9515654 |             |             |             |             |             |
| ACAD9       | ACAD9       | 3353.63607  | 3938.462883 | 1941.961263 |             |
| 3058.294705 |             |             |             |             |             |
| ZNF286A     | ZNF286A     | 619.6554248 | 668.2590452 | 681.2489396 |             |
| 705.1801601 |             |             |             |             |             |
| ALKBH1      | ALKBH1      | 1405.645576 | 1812.830388 | 1297.319409 |             |
| 1330.226211 |             |             |             |             |             |
| CFD         | CFD         | 78.481878   | 75.1537528  | 30.3570956  |             |
| 32.05364364 |             |             |             |             |             |
| FNTB        | FNTB        | 1197.141482 | 1403.547113 | 1074.998327 |             |
| 1260.462398 |             |             |             |             |             |
| PSCA        | PSCA        | 2.342742627 | 0           | 0           | 0           |
| EPM2A       | EPM2A       | 394.7521326 | 366.6284427 | 628.5704501 |             |
| 356.3610969 |             |             |             |             |             |
| FGD6        | FGD6        | 166.3347265 | 85.30966534 | 102.6784116 |             |
| 42.42394011 |             |             |             |             |             |

|             |         |             |               |             |
|-------------|---------|-------------|---------------|-------------|
| RSAD1       | RSAD1   | 1361.133466 | 2190.630335   | 3289.280594 |
| 2906.511275 |         |             |               |             |
| MEP1B       | MEP1B   | 2.342742627 | 1.015591254   | 0 0         |
| GATA3       | GATA3   | 4267.305695 | 7189.370487   | 3718.744211 |
| 3293.040507 |         |             |               |             |
| PPIB        | PPIB    | 20633.70569 | 30522.57955   | 19211.57724 |
| 16942.23617 |         |             |               |             |
| SLC2A4      | SLC2A4  | 0 0         | 0 9.427542247 |             |
| SI          | SI      | 0 0         | 1.785711506   | 0           |
| ECT2        | ECT2    | 6087.616716 | 4799.684267   | 1433.926339 |
| 2517.15378  |         |             |               |             |
| PCDHGA7     | PCDHGA7 | 1.171371313 | 15.23386881   | 26.78567259 |
| 13.19855915 |         |             |               |             |
| AN06        | AN06    | 3184.958601 | 2218.051299   | 2282.139305 |
| 2824.491657 |         |             |               |             |
| TNFSF8      | TNFSF8  | 4726.48325  | 6591.187239   | 8491.058211 |
| 5249.255523 |         |             |               |             |
| DI01        | DI01    | 2.342742627 | 11.17150379   | 7.142846024 |
| 2.828262674 |         |             |               |             |
| PLA2G4F     | PLA2G4F | 0 0         | 0.892855753   | 0           |
| PIN1        | PIN1    | 4362.186771 | 5779.729827   | 3351.780497 |
| 3232.704237 |         |             |               |             |
| KCTD17      | KCTD17  | 1068.290638 | 957.7025526   | 630.3561616 |
| 832.4519804 |         |             |               |             |
| ACVR2B      | ACVR2B  | 134.707701  | 45.70160643   | 149.1069108 |
| 175.3522858 |         |             |               |             |
| ATM         | ATM     | 2662.526995 | 929.2659975   | 2615.174501 |
| 2757.556107 |         |             |               |             |
| UROS        | UROS    | 3001.053305 | 3864.324722   | 2567.853146 |
| 2773.582929 |         |             |               |             |
| TRIM64B     | TRIM64B | 0 0         | 2.678567259   | 0           |
| KAL1        | KAL1    | 0 0         | 2.678567259   | 0           |
| TIMD4       | TIMD4   | 194.447638  | 82.26289158   | 30.3570956  |
| 176.29504   |         |             |               |             |
| ZNF200      | ZNF200  | 1574.323045 | 1639.164284   | 2402.674831 |
| 1810.088111 |         |             |               |             |
| SENP8       | SENP8   | 124.1653592 | 186.8687907   | 172.3211603 |
| 230.9747851 |         |             |               |             |
| RETN        | RETN    | 1.171371313 | 0 0           | 0           |
| SLC31A2     | SLC31A2 | 399.4376179 | 725.1321554   | 830.3558503 |
| 643.9011355 |         |             |               |             |
| ADCY5       | ADCY5   | 5.856856567 | 5.07795627    | 21.42853807 |
| 10.37029647 |         |             |               |             |
| BTBD9       | BTBD9   | 502.5182935 | 603.2612049   | 1130.355383 |
| 741.0048206 |         |             |               |             |
| EZR         | EZR     | 35979.84126 | 51554.45883   | 26060.67372 |
| 25622.17432 |         |             |               |             |
| DMXL2       | DMXL2   | 214.3609504 | 102.5747167   | 294.6423985 |
| 116.9015239 |         |             |               |             |
| TNFSF12     | TNFSF12 | 694.6231889 | 1378.157332   | 652.6775555 |

|                 |               |  |             |             |
|-----------------|---------------|--|-------------|-------------|
| 736.2910495     |               |  |             |             |
| LHX4-AS1        | LHX4-AS1      |  | 26.94154021 | 17.26505132 |
| 109.8212576     | 22.62610139   |  |             |             |
| SLX1B-SULT1A4   | SLX1B-SULT1A4 |  | 130.0222158 | 102.5747167 |
| 159.8211798     | 119.7297865   |  |             |             |
| GMPS GMPS       | 7781.419635   |  | 8925.015941 | 5653.562628 |
| 6858.536985     |               |  |             |             |
| CAMKK1 CAMKK1   | 117.1371313   |  | 96.48116913 | 131.2497957 |
| 161.2109724     |               |  |             |             |
| NTAN1 NTAN1     | 2869.859718   |  | 3277.312977 | 1966.961224 |
| 2000.524465     |               |  |             |             |
| PLXND1 PLXND1   | 97.22381902   |  | 25.38978135 | 79.46416202 |
| 217.7762259     |               |  |             |             |
| ZNF644 ZNF644   | 3251.726766   |  | 2775.610897 | 3916.958189 |
| 3986.907616     |               |  |             |             |
| PELI3 PELI3     | 281.1291152   |  | 399.1273628 | 550.8919996 |
| 582.6221109     |               |  |             |             |
| HSF2 HSF2       | 1480.61334    |  | 1418.780982 | 2030.353982 |
| 2130.624548     |               |  |             |             |
| PARN PARN       | 6177.812307   |  | 6570.875414 | 4781.242557 |
| 6245.746739     |               |  |             |             |
| SULT1A3 SULT1A3 | 18.74194102   |  | 6.093547524 | 14.28569205 |
| 17.91233027     |               |  |             |             |
| TSSK2 TSSK2     | 30.45565415   |  | 25.38978135 | 86.60700804 |
| 44.30944856     |               |  |             |             |
| KIAA1377        | KIAA1377      |  | 66.76816487 | 73.12257029 |
| 85.71415229     | 65.05004151   |  |             |             |
| ORAI1 ORAI1     | 5062.666817   |  | 7526.546784 | 5387.491614 |
| 5092.758322     |               |  |             |             |
| PPP1R9B PPP1R9B | 284.6432292   |  | 73.12257029 | 55.35705669 |
| 84.84788022     |               |  |             |             |
| LBR LBR         | 33921.74187   |  | 32561.88679 | 17704.43673 |
| 19334.00364     |               |  |             |             |
| INHBE INHBE     | 3.51411394    |  | 4.062365016 | 7.142846024 |
| 1.885508449     |               |  |             |             |
| AGAP3 AGAP3     | 445.1210991   |  | 643.8848551 | 491.0706642 |
| 838.1085058     |               |  |             |             |
| LOC100996351    | LOC100996351  |  | 534.1453189 | 647.9472201 |
| 173.2140161     | 329.9639787   |  |             |             |
| ART4 ART4       | 1.171371313   |  | 0 0         | 0           |
| DNAJC25 DNAJC25 | 234.2742627   |  | 289.4435074 | 395.5350986 |
| 342.2197836     |               |  |             |             |
| ASTE1 ASTE1     | 1383.389521   |  | 1293.863258 | 1929.461282 |
| 1916.619339     |               |  |             |             |
| NOB1 NOB1       | 2790.206469   |  | 3683.549478 | 3243.744951 |
| 2927.251868     |               |  |             |             |
| MAP3K5 MAP3K5   | 4779.194959   |  | 4124.316083 | 2567.853146 |
| 3128.058518     |               |  |             |             |
| APOBEC3C        | APOBEC3C      |  | 16214.12172 | 23416.48754 |
| 8005.344682     | 9763.162751   |  |             |             |

|             |             |             |             |             |
|-------------|-------------|-------------|-------------|-------------|
| PCM1        | PCM1        | 6366.403089 | 4638.205257 | 6330.347289 |
| 6808.571011 |             |             |             |             |
| GRAMD1C     | GRAMD1C     | 30.45565415 | 7.109138778 | 24.10710533 |
| 110.3022443 |             |             |             |             |
| STARD9      | STARD9      | 113.6230174 | 85.30966534 | 116.9641036 |
| 129.1573288 |             |             |             |             |
| GPA33       | GPA33       | 367.8105924 | 473.2655244 | 741.9631308 |
| 273.3987252 |             |             |             |             |
| GINS1       | GINS1       | 3693.333751 | 2373.436761 | 983.0341841 |
| 1455.612523 |             |             |             |             |
| HIST1H2AD   | HIST1H2AD   |             | 2065.127626 | 585.9961536 |
| 248.2138993 | 332.7922413 |             |             |             |
| HIST1H2AG   | HIST1H2AG   |             | 163.9919839 | 207.1806158 |
| 83.03558503 | 66.93554995 |             |             |             |
| NSUN6       | NSUN6       | 919.5264811 | 839.8939671 | 611.6061908 |
| 904.1013015 |             |             |             |             |
| MR1         | MR1         | 2798.406068 | 3701.830121 | 4103.565041 |
| 3562.668215 |             |             |             |             |
| CHRNA6      | CHRNA6      | 831.6736326 | 1763.066417 | 1006.248434 |
| 683.4968129 |             |             |             |             |
| PRMT2       | PRMT2       | 6502.282161 | 8060.747783 | 10463.37657 |
| 8455.562641 |             |             |             |             |
| AAMP        | AAMP        | 6364.060346 | 7919.580599 | 7524.095431 |
| 6534.229532 |             |             |             |             |
| AADAC       | AADAC       | 0           | 1.785711506 | 0           |
| MEGF10      | MEGF10      | 12.88508445 | 0           | 4.464278765 |
| STX10       | STX10       | 2491.506784 | 2656.786721 | 1926.782715 |
| 1996.753448 |             |             |             |             |
| HERC3       | HERC3       | 2052.242541 | 2406.951272 | 3384.81616  |
| 3443.881183 |             |             |             |             |
| RECQL5      | RECQL5      | 1566.123446 | 1708.224489 | 1941.068407 |
| 1923.218618 |             |             |             |             |
| C9orf135    | C9orf135    |             | 2.342742627 | 9.140321286 |
| 0.892855753 | 13.19855915 |             |             |             |
| ANK2        | ANK2        | 1.171371313 | 17.26505132 | 8.92855753  |
| 18.85508449 |             |             |             |             |
| ZNF16       | ZNF16       | 366.6392211 | 531.1542259 | 1053.569789 |
| 749.4896086 |             |             |             |             |
| PRSS3       | PRSS3       | 0           | 3.571423012 | 0           |
| SOX5        | SOX5        | 8.199599194 | 0           | 10.37029647 |
| EMILIN1     | EMILIN1     | 137.0504437 | 142.1827756 | 207.1425347 |
| 132.9283457 |             |             |             |             |
| SOX12       | SOX12       | 49.19759517 | 12.18709505 | 90.17843106 |
| 61.27902461 |             |             |             |             |
| LIN37       | LIN37       | 647.7683363 | 785.0520394 | 1274.998015 |
| 912.5860895 |             |             |             |             |
| TULP4       | TULP4       | 2581.702375 | 2031.182508 | 1882.139927 |
| 1756.351121 |             |             |             |             |
| SNRPA       | SNRPA       | 5904.882791 | 6606.421108 | 3166.0665   |
| 3982.193845 |             |             |             |             |



|             |          |             |             |             |
|-------------|----------|-------------|-------------|-------------|
| SMS         | SMS      | 5672.951271 | 9632.883045 | 6366.061519 |
| 6001.573395 |          |             |             |             |
| FSTL1       | FSTL1    | 0           | 6.093547524 | 0           |
| 11.3130507  |          |             |             |             |
| TRIO        | TRIO     | 65.59679355 | 51.79515396 | 24.99996108 |
| 0.942754225 |          |             |             |             |
| DSG2        | DSG2     | 234.2742627 | 67.02902277 | 15.1785478  |
| 74.47758375 |          |             |             |             |
| PPP1R3D     | PPP1R3D  | 373.667449  | 308.7397412 | 483.9278181 |
| 510.9727898 |          |             |             |             |
| PPEF2       | PPEF2    | 0           | 0           | 6.249990271 |
| 0.942754225 |          |             |             |             |
| RAC1        | RAC1     | 10130.01912 | 11791.01446 | 7923.201952 |
| 9043.841278 |          |             |             |             |
| CCDC176     | CCDC176  | 398.2662466 | 470.2187506 | 368.749426  |
| 515.6865609 |          |             |             |             |
| PRR11       | PRR11    | 3719.10392  | 2655.771129 | 745.5345538 |
| 1341.539262 |          |             |             |             |
| RPS23       | RPS23    | 12991.67924 | 13631.26581 | 14327.65627 |
| 14271.41345 |          |             |             |             |
| NOSIP       | NOSIP    | 7947.754362 | 8880.329925 | 5952.669305 |
| 4898.550952 |          |             |             |             |
| TULP3       | TULP3    | 586.857028  | 592.0897011 | 1093.748297 |
| 688.210584  |          |             |             |             |
| ZNF646      | ZNF646   | 1137.401545 | 444.8289693 | 690.1774971 |
| 813.5968959 |          |             |             |             |
| H2AFZ       | H2AFZ    | 38314.38429 | 47464.67285 | 25333.88914 |
| 26580.95537 |          |             |             |             |
| MCM8        | MCM8     | 420.5223015 | 270.1472736 | 161.6068913 |
| 241.3450815 |          |             |             |             |
| FMNL3       | FMNL3    | 1786.341253 | 1561.979349 | 1692.854508 |
| 1914.73383  |          |             |             |             |
| SDC3        | SDC3     | 7.028227881 | 0           | 0           |
| 16.02682182 |          |             |             |             |
| FAM157B     | FAM157B  | 0           | 0           | 1.785711506 |
| 0           |          |             |             |             |
| ARPC4       | ARPC4    | 18491.26755 | 19260.68813 | 8960.700337 |
| 10662.55028 |          |             |             |             |
| BRMS1       | BRMS1    | 4167.739133 | 6168.701277 | 4755.349741 |
| 4547.84638  |          |             |             |             |
| MB21D2      | MB21D2   | 462.6916688 | 734.2724767 | 571.4276819 |
| 563.7670264 |          |             |             |             |
| GPR108      | GPR108   | 5041.582133 | 6710.011416 | 6197.311782 |
| 5717.804373 |          |             |             |             |
| COL21A1     | COL21A1  | 0           | 0           | 0.892855753 |
| 0           |          |             |             |             |
| TTC5        | TTC5     | 2148.294989 | 2930.996359 | 1720.533036 |
| 1971.299084 |          |             |             |             |
| ZG16        | ZG16     | 0           | 4.062365016 | 0           |
| 0           |          |             |             |             |
| C19orf25    | C19orf25 | 1689.415571 | 1618.835155 | 1991.574449 |
| 2101.782443 |          |             |             |             |
| C16orf54    | C16orf54 | 878.6469374 | 1049.548697 | 2637.490487 |
| 3487.494571 |          |             |             |             |
| TBC1D8B     | TBC1D8B  | 29.28428284 | 17.26505132 | 93.74985407 |
| 30.16813519 |          |             |             |             |

|             |           |             |             |             |   |
|-------------|-----------|-------------|-------------|-------------|---|
| LRR57       | LRR57     | 1338.877411 | 1346.674003 | 1301.783688 |   |
| 1379.249431 |           |             |             |             |   |
| GTF2E2      | GTF2E2    | 3238.841682 | 4525.474628 | 3055.352387 |   |
| 3143.142585 |           |             |             |             |   |
| SSSCA1      | SSSCA1    | 2184.6075   | 2922.871629 | 1955.354099 |   |
| 1858.168577 |           |             |             |             |   |
| PSMD10      | PSMD10    | 3025.652103 | 3469.259724 | 4163.386376 |   |
| 3848.322745 |           |             |             |             |   |
| PSMD3       | PSMD3     | 10542.34182 | 8730.02242  | 5949.097882 |   |
| 5102.185864 |           |             |             |             |   |
| DMWD        | DMWD      | 875.0143712 | 732.2412942 | 822.3201485 |   |
| 642.015627  |           |             |             |             |   |
| LOC644762   | LOC644762 |             | 1.171371313 | 0           | 0 |
| ZNF84       | ZNF84     | 14.05645576 | 10.15591254 | 33.03566286 | 0 |
| 19.79783872 |           |             |             |             |   |
| ABCA7       | ABCA7     | 1409.15969  | 612.4015262 | 925.8914159 |   |
| 1064.36952  |           |             |             |             |   |
| ASCC2       | ASCC2     | 6156.727624 | 8887.439064 | 6185.704657 |   |
| 5665.952891 |           |             |             |             |   |
| RSAD2       | RSAD2     | 2058.099398 | 3595.193039 | 19494.61251 |   |
| 8480.074251 |           |             |             |             |   |
| ABI3BP      | ABI3BP    | 10.54234182 | 10.15591254 | 3.571423012 |   |
| 24.51160984 |           |             |             |             |   |
| ZNF324B     | ZNF324B   | 180.3911823 | 103.5903079 | 156.2497568 |   |
| 98.9891936  |           |             |             |             |   |
| ZNF662      | ZNF662    | 4.685485254 | 3.046773762 | 48.21421066 |   |
| 15.0840676  |           |             |             |             |   |
| CPSF4L      | CPSF4L    | 122.9939879 | 137.1048193 | 111.6069691 |   |
| 103.7029647 |           |             |             |             |   |
| WDR47       | WDR47     | 1325.992327 | 1735.645453 | 2304.460699 |   |
| 1885.508449 |           |             |             |             |   |
| NME2        | NME2      | 11181.91056 | 14691.54308 | 7942.844779 |   |
| 8998.589075 |           |             |             |             |   |
| FAM205A     | FAM205A   | 0           | 0.892855753 | 0           |   |
| CCDC58      | CCDC58    | 322.1271112 | 906.9229899 | 792.8559087 |   |
| 251.715378  |           |             |             |             |   |
| IGBP1       | IGBP1     | 1697.317033 | 2123.601312 | 1803.568621 |   |
| 1949.615737 |           |             |             |             |   |
| OTP         | OTP       | 0           | 0.942754225 |             |   |
| TRMT13      | TRMT13    | 980.4377894 | 878.4864348 | 1270.533737 |   |
| 1211.439179 |           |             |             |             |   |
| PLL2        | PLL2      | 2.342742627 | 13.2026863  | 113.3926806 |   |
| 40.53843166 |           |             |             |             |   |
| ZNF589      | ZNF589    | 1133.887431 | 999.341794  | 1352.676466 |   |
| 1425.444388 |           |             |             |             |   |
| EHMT1       | EHMT1     | 4200.53753  | 4412.743999 | 3252.673508 |   |
| 3798.356771 |           |             |             |             |   |
| UTP20       | UTP20     | 2883.916174 | 1712.286854 | 1698.211642 |   |
| 2037.29188  |           |             |             |             |   |
| AMER2       | AMER2     | 0           | 5.357134518 | 0           |   |

|              |              |             |             |             |             |
|--------------|--------------|-------------|-------------|-------------|-------------|
| CTHRC1       | CTHRC1       | 216.703693  | 243.741901  | 27.67852834 |             |
| 31.11088942  |              |             |             |             |             |
| C11orf63     | C11orf63     |             | 72.62502143 | 191.946747  |             |
| 431.2493287  | 269.6277083  |             |             |             |             |
| LIPI         | LIPI         | 2.342742627 | 1.015591254 | 0           | 0           |
| MUSTN1       | MUSTN1       | 59.73993699 | 50.7795627  | 32.14280711 |             |
| 63.16453306  |              |             |             |             |             |
| SYT6         | SYT6         | 0           | 0           | 9.821413283 | 0           |
| GMPPA        | GMPPA        | 2965.912166 | 3970.961803 | 3136.60226  |             |
| 2553.921195  |              |             |             |             |             |
| PHLPP1       | PHLPP1       | 336.183567  | 342.2542526 | 228.5710728 |             |
| 163.0964809  |              |             |             |             |             |
| COQ10A       | COQ10A       | 286.9859718 | 385.9246765 | 413.3922137 |             |
| 466.6633412  |              |             |             |             |             |
| CTRB2        | CTRB2        | 0           | 1.015591254 | 0           | 0           |
| HLA-DQB2     | HLA-DQB2     | 0           | 0           | 5.07795627  | 0.892855753 |
| 0.942754225  |              |             |             |             |             |
| GTF2H2C_2    | GTF2H2C_2    |             | 732.1070709 | 887.626756  |             |
| 674.1060935  | 955.9527839  |             |             |             |             |
| PI4KAP2      | PI4KAP2      | 281.1291152 | 183.822017  | 410.7136464 |             |
| 406.3270709  |              |             |             |             |             |
| SRRD         | SRRD         | 1898.792899 | 2588.742107 | 1835.711428 |             |
| 1876.080907  |              |             |             |             |             |
| SAA1         | SAA1         | 1.171371313 | 0           | 0           | 6.599279573 |
| EIF3D        | EIF3D        | 10548.19868 | 15565.96715 | 12153.55251 |             |
| 12217.152    |              |             |             |             |             |
| CAT          | CAT          | 4013.11812  | 7091.873727 | 3729.45848  |             |
| 2649.139371  |              |             |             |             |             |
| CHCHD10      | CHCHD10      | 441.6069852 | 182.8064257 | 149.9997665 |             |
| 210.2341921  |              |             |             |             |             |
| DHX35        | DHX35        | 1144.429773 | 1142.540161 | 1318.747947 |             |
| 1204.839899  |              |             |             |             |             |
| MIR4435-2    | MIR4435-2    |             | 5.856856567 | 3.046773762 | 0           |
| 10.37029647  |              |             |             |             |             |
| MIR4436A     | MIR4436A     |             | 0           | 0           | 0.892855753 |
| LOC100128233 | LOC100128233 |             | 0           | 1.015591254 | 0           |
| EMBP1        | EMBP1        | 166.3347265 | 208.1962071 | 270.5352932 |             |
| 189.4935992  |              |             |             |             |             |
| GIPC3        | GIPC3        | 65.59679355 | 29.45214637 | 30.3570956  |             |
| 12.25580492  |              |             |             |             |             |
| SNORA30      | SNORA30      | 1.171371313 | 0           | 0.892855753 | 1.885508449 |
| SNHG7        | SNHG7        | 208.5040938 | 240.6951272 | 469.6421261 |             |
| 297.910335   |              |             |             |             |             |
| CCL27        | CCL27        | 1.171371313 | 4.062365016 | 0.892855753 |             |
| 1.885508449  |              |             |             |             |             |
| CFAP20       | CFAP20       | 3389.948581 | 4665.626221 | 4127.672146 |             |
| 3721.993679  |              |             |             |             |             |
| WDTC1        | WDTC1        | 700.4800454 | 259.991361  | 405.3565119 |             |
| 404.4415624  |              |             |             |             |             |
| PCDHB1       | PCDHB1       | 1.171371313 | 0           | 0.892855753 | 0           |

|             |            |             |             |             |
|-------------|------------|-------------|-------------|-------------|
| TBC1D13     | TBC1D13    | 2655.498768 | 3205.205998 | 3838.386882 |
| 2877.285894 |            |             |             |             |
| PRPF39      | PRPF39     | 2026.472372 | 1437.061624 | 2466.06759  |
| 2272.980436 |            |             |             |             |
| RHEB        | RHEB       | 3589.081704 | 4212.672522 | 4993.742227 |
| 4401.719475 |            |             |             |             |
| UBE20       | UBE20      | 3044.394044 | 3069.11677  | 3234.816393 |
| 2730.216235 |            |             |             |             |
| NUCKS1      | NUCKS1     | 2673.069337 | 957.7025526 | 1029.462683 |
| 1461.269048 |            |             |             |             |
| INF2        | INF2       | 937.0970508 | 1382.219697 | 408.0350791 |
| 550.5684672 |            |             |             |             |
| ETV3L       | ETV3L      | 1.171371313 | 0           | 0           |
| RBP1        | RBP1       | 0           | 13.2026863  | 0.892855753 |
| CARNS1      | CARNS1     | 17.5705697  | 23.35859884 | 65.17846997 |
| 99.93194782 |            |             |             |             |
| SNX3        | SNX3       | 6184.840535 | 7674.823107 | 7713.38085  |
| 7013.148678 |            |             |             |             |
| CACNA1B     | CACNA1B    | 3.51411394  | 0           | 0           |
| GMPPB       | GMPPB      | 4288.390379 | 5675.123928 | 3313.387699 |
| 3246.84555  |            |             |             |             |
| HEATR6      | HEATR6     | 1484.127454 | 1479.716457 | 1177.676738 |
| 1663.018452 |            |             |             |             |
| CDC26       | CDC26      | 1416.187918 | 1504.090647 | 1743.747286 |
| 1660.19019  |            |             |             |             |
| FAM161B     | FAM161B    | 304.5565415 | 360.5348952 | 591.0705085 |
| 595.82067   |            |             |             |             |
| HCG27       | HCG27      | 4.685485254 | 16.24946006 | 48.21421066 |
| 2.828262674 |            |             |             |             |
| PUM2        | PUM2       | 4487.523502 | 2877.170023 | 2801.781353 |
| 3710.680628 |            |             |             |             |
| SPRED1      | SPRED1     | 4.685485254 | 6.093547524 | 20.53568232 |
| 8.484788022 |            |             |             |             |
| SYNE3       | SYNE3      | 889.0708269 | 935.359545  | 264.2853029 |
| 378.9871983 |            |             |             |             |
| PPID        | PPID       | 4131.426623 | 4533.599358 | 4333.028969 |
| 4761.851589 |            |             |             |             |
| TBX19       | TBX19      | 38.65525334 | 63.98224901 | 207.1425347 |
| 131.9855915 |            |             |             |             |
| C22orf24    | C22orf24   |             | 25.7701689  | 60.93547524 |
| 55.35705669 | 15.0840676 |             |             |             |
| CYP2S1      | CYP2S1     | 2.342742627 | 64.99784026 | 22.32139383 |
| 50.90872813 |            |             |             |             |
| HVCN1       | HVCN1      | 520.0888632 | 704.8203303 | 458.9278571 |
| 461.0068159 |            |             |             |             |
| GOLGA6A     | GOLGA6A    | 0           | 1.015591254 | 0           |
| HACE1       | HACE1      | 1238.139478 | 1289.800893 | 1.885508449 |
| 933.3266825 |            |             |             | 819.6415813 |
| SDR39U1     | SDR39U1    | 2722.266932 | 2275.94     | 3595.530117 |
| MFF         | MFF        | 4402.013396 | 4738.748791 | 3502.331945 |
|             |            |             |             | 4558.028619 |

|             |             |             |             |             |   |
|-------------|-------------|-------------|-------------|-------------|---|
| 4978.685061 |             |             |             |             |   |
| GAPDHS      | GAPDHS      | 128.8508445 | 60.93547524 | 160.7140355 |   |
| 149.8979217 |             |             |             |             |   |
| FAM117B     | FAM117B     | 402.9517318 | 345.3010264 | 1769.640103 |   |
| 1380.192185 |             |             |             |             |   |
| UBL3        | UBL3        | 1836.71022  | 1238.005739 | 1722.318748 |   |
| 1696.957604 |             |             |             |             |   |
| DUOX1       | DUOX1       | 59.73993699 | 32.49892013 | 90.17843106 |   |
| 92.38991402 |             |             |             |             |   |
| ZNF440      | ZNF440      | 344.3831662 | 361.5504864 | 319.6423596 |   |
| 620.3322799 |             |             |             |             |   |
| CEP89       | CEP89       | 626.6836527 | 659.1187239 | 437.499319  |   |
| 559.9960095 |             |             |             |             |   |
| RRP9        | RRP9        | 2553.589463 | 4000.41395  | 3086.602338 |   |
| 3096.947628 |             |             |             |             |   |
| CAMK1       | CAMK1       | 2554.760835 | 1695.021803 | 877.6772052 |   |
| 2004.295482 |             |             |             |             |   |
| APOL2       | APOL2       | 5321.539877 | 6292.60341  | 8115.165939 |   |
| 8773.270815 |             |             |             |             |   |
| FAM156B     | FAM156B     | 89.02421982 | 152.3386881 | 81.24987353 |   |
| 97.10368515 |             |             |             |             |   |
| ANKRD12     | ANKRD12     | 3464.916345 | 2739.049612 | 8838.379099 |   |
| 9587.810465 |             |             |             |             |   |
| SPATA13     | SPATA13     | 7296.471912 | 6268.22922  | 11673.19612 |   |
| 10873.72723 |             |             |             |             |   |
| GRIP1       | GRIP1       | 26.94154021 | 11.17150379 | 91.96414256 |   |
| 131.0428372 |             |             |             |             |   |
| VAPA        | VAPA        | 10937.09395 | 14999.26723 | 11198.19685 |   |
| 10050.70279 |             |             |             |             |   |
| GSKIP       | GSKIP       | 3249.384024 | 3639.879055 | 3331.244815 |   |
| 3230.818728 |             |             |             |             |   |
| CACNA1I     | CACNA1I     | 58.56856567 | 9.140321286 | 180.3568621 |   |
| 174.4095316 |             |             |             |             |   |
| NTRK1       | NTRK1       | 128.8508445 | 253.8978135 | 227.678217  |   |
| 499.6597391 |             |             |             |             |   |
| ZNF600      | ZNF600      | 759.0486111 | 725.1321554 | 2008.925444 |   |
| 1573.456801 |             |             |             |             |   |
| ADAM20P1    | ADAM20P1    |             | 3.51411394  | 3.046773762 | 0 |
| 0           |             |             |             |             |   |
| LOC440040   | LOC440040   |             | 0           | 0.892855753 | 0 |
| LOC642852   | LOC642852   |             | 148.7641568 | 91.40321286 |   |
| 75.89273901 | 123.5008034 |             |             |             |   |
| CASC2       | CASC2       | 9.370970508 | 17.26505132 | 14.28569205 |   |
| 23.56885562 |             |             |             |             |   |
| SPESP1      | SPESP1      | 63.25405093 | 12.18709505 | 24.99996108 |   |
| 32.99639787 |             |             |             |             |   |
| RBM17       | RBM17       | 8568.581158 | 11227.36131 | 7158.917428 |   |
| 7074.427702 |             |             |             |             |   |
| PSMG4       | PSMG4       | 691.1090749 | 905.9073986 | 815.1773025 |   |
| 682.5540587 |             |             |             |             |   |

|              |              |             |             |             |             |
|--------------|--------------|-------------|-------------|-------------|-------------|
| HIGD1C       | HIGD1C       | 2.342742627 | 0           | 0           | 0           |
| SPINK9       | SPINK9       | 0           | 0           | 3.571423012 | 0           |
| LINC00641    | LINC00641    |             | 46.85485254 |             | 45.70160643 |
| 41.96422039  | 49.96597391  |             |             |             |             |
| KCNQ10T1     | KCNQ10T1     |             | 140.5645576 |             | 142.1827756 |
| 224.106794   | 343.1625378  |             |             |             |             |
| C4orf29      | C4orf29      | 1008.550701 | 1070.433182 |             | 912.4985796 |
| 760.8026593  |              |             |             |             |             |
| S100A13      | S100A13      | 297.5283136 | 317.8800625 |             | 337.4994746 |
| 272.4559709  |              |             |             |             |             |
| C7orf55      | C7orf55      | 773.1050669 | 1126.290701 |             | 900.8914548 |
| 716.4932108  |              |             |             |             |             |
| PTPN12       | PTPN12       | 174.5343257 | 99.5279429  |             | 117.8569594 |
| 123.5008034  |              |             |             |             |             |
| ARL17B       | ARL17B       | 81.99599194 | 98.51235164 |             | 89.2855753  |
| 105.5884732  |              |             |             |             |             |
| ZNF843       | ZNF843       | 0           | 2.031182508 | 3.571423012 | 0           |
| POR          | POR          | 3264.611851 | 4463.523562 |             | 4536.600081 |
| 3935.056134  |              |             |             |             |             |
| LMTK3        | LMTK3        | 0           | 1.015591254 | 16.07140355 | 9.427542247 |
| FAM21EP      | FAM21EP      | 17.5705697  | 18.28064257 |             | 33.92851862 |
| 18.85508449  |              |             |             |             |             |
| LOC100505736 | LOC100505736 |             | 30.45565415 |             | 4.062365016 |
| 5.357134518  | 23.56885562  |             |             |             |             |
| CAGE1        | CAGE1        | 28.11291152 | 19.29623383 |             | 20.53568232 |
| 6.599279573  |              |             |             |             |             |
| NAA35        | NAA35        | 2186.950242 | 2406.951272 |             | 2017.854002 |
| 1786.519256  |              |             |             |             |             |
| ACSM2A       | ACSM2A       | 1.171371313 | 0           | 3.571423012 | 0           |
| USP22        | USP22        | 5788.917031 | 4117.206944 |             | 4868.742421 |
| 3060.180213  |              |             |             |             |             |
| SERP1        | SERP1        | 10828.15642 | 12378.0262  |             | 13517.8361  |
| 12528.26089  |              |             |             |             |             |
| TXNDC2       | TXNDC2       | 4.685485254 | 0           | 0           | 0           |
| LEAP2        | LEAP2        | 89.02421982 | 49.76397145 |             | 137.499786  |
| 90.50440557  |              |             |             |             |             |
| SH3RF2       | SH3RF2       | 44.51210991 | 34.53010264 |             | 0           |
| AHI1         | AHI1         | 1508.726252 | 1190.27295  |             | 19.79783872 |
| 855.0780818  |              |             |             |             | 834.8201291 |
| GHDC         | GHDC         | 880.8712277 | 700.7579653 |             | 750.8916883 |
| 741.0048206  |              |             |             |             |             |
| SQLE         | SQLE         | 1950.333237 | 2685.223276 |             | 2592.853107 |
| 2424.763866  |              |             |             |             |             |
| C20orf96     | C20orf96     |             | 118.3085027 |             | 80.23170907 |
| 30.3570956   | 64.10728728  |             |             |             |             |
| PCBP1        | PCBP1        | 10795.35802 | 7021.797931 |             | 6699.096715 |
| 6687.89847   |              |             |             |             |             |
| TOMM20       | TOMM20       | 3076.021069 | 3053.882901 |             | 3808.029787 |
| 2934.793902  |              |             |             |             |             |
| LPPR1        | LPPR1        | 0           | 0           | 4.464278765 | 0           |

|             |             |             |             |             |
|-------------|-------------|-------------|-------------|-------------|
| CHRNA1      | CHRNA1      | 556.4013739 | 744.4283892 | 836.6058406 |
| 675.0120249 |             |             |             |             |
| SNAP23      | SNAP23      | 7794.30472  | 7470.689265 | 5439.277247 |
| 6603.993344 |             |             |             |             |
| ZP1         | ZP1         | 3.51411394  | 4.062365016 | 8.92855753  |
| 0.942754225 |             |             |             |             |
| TMEM150B    | TMEM150B    |             | 15.22782708 | 5.07795627  |
| 3.571423012 | 0           |             |             |             |
| JAKMIP2-AS1 | JAKMIP2-AS1 |             | 39.82662466 | 42.65483267 |
| 2.678567259 | 44.30944856 |             |             |             |
| RFPL3S      | RFPL3S      | 1.171371313 | 4.062365016 | 22.32139383 |
| 13.19855915 |             |             |             |             |
| C21orf67    | C21orf67    |             | 212.0182077 | 287.4123249 |
| 270.5352932 | 247.0016069 |             |             |             |
| DUXAP10     | DUXAP10     | 1.171371313 | 42.65483267 | 22.32139383 |
| 0.942754225 |             |             |             |             |
| SNORA11B    | SNORA11B    |             | 4.685485254 | 3.046773762 |
| 2.678567259 | 3.771016899 |             |             |             |
| SNORD11B    | SNORD11B    |             | 11.71371313 | 0           |
|             | 3.771016899 |             |             | 0.892855753 |
| SUSD4       | SUSD4       | 25.7701689  | 107.6526729 | 105.3569789 |
| 98.9891936  |             |             |             |             |
| KLF16       | KLF16       | 209.6754651 | 56.87311023 | 81.24987353 |
| 75.42033798 |             |             |             |             |
| NFAT5       | NFAT5       | 1903.478384 | 1687.912664 | 2546.424608 |
| 2194.731835 |             |             |             |             |
| REEP1       | REEP1       | 0           | 10.15591254 | 0           |
|             |             |             |             | 19.79783872 |
| EPB41L5     | EPB41L5     | 446.2924704 | 497.6397145 | 672.320382  |
| 429.8959265 |             |             |             |             |
| STX1A       | STX1A       | 105.4234182 | 151.3230969 | 198.2139772 |
| 153.6689386 |             |             |             |             |
| WASF2       | WASF2       | 4803.793757 | 2395.779768 | 2826.781314 |
| 2946.106952 |             |             |             |             |
| PYCARD      | PYCARD      | 2025.301001 | 3203.174815 | 539.2848748 |
| 778.7149896 |             |             |             |             |
| SLC2A12     | SLC2A12     | 49.19759517 | 43.67042392 | 115.1783921 |
| 120.6725408 |             |             |             |             |
| PIGM        | PIGM        | 741.4780414 | 810.4418207 | 1422.319215 |
| 1152.988417 |             |             |             |             |
| DGCR10      | DGCR10      | 3.51411394  | 0           | 0.892855753 |
|             |             |             |             | 0           |
| SNORD111B   | SNORD111B   |             | 1.171371313 | 0           |
|             |             |             |             | 2.678567259 |
|             |             |             |             | 0           |
| POU6F1      | POU6F1      | 33.96976809 | 11.17150379 | 268.7495817 |
| 286.5972843 |             |             |             |             |
| MIR99AHG    | MIR99AHG    |             | 1.171371313 | 0           |
|             |             |             |             | 9.821413283 |
|             | 8.484788022 |             |             |             |
| MIR3613     | MIR3613     | 1.171371313 | 0           | 0           |
|             |             |             |             | 0           |
| MIR3609     | MIR3609     | 1.171371313 | 0           | 4.464278765 |
|             |             |             |             | 0           |
| SDHAP1      | SDHAP1      | 1419.702032 | 733.2568854 | 1499.104809 |
| 1558.372733 |             |             |             |             |

|                 |              |               |               |
|-----------------|--------------|---------------|---------------|
| FAM86B3P        | FAM86B3P     | 94.88107639   | 17.26505132   |
| 71.42846024     | 119.7297865  |               |               |
| LINC01000       | LINC01000    | 380.6956769   | 145.2295493   |
| 441.070742      | 501.5452475  |               |               |
| LOC100288842    | LOC100288842 | 94.88107639   | 75.1537528    |
| 55.35705669     | 60.33627038  |               |               |
| RNF19A RNF19A   | 4967.78574   | 3694.720982   | 4472.314467   |
| 6626.619446     |              |               |               |
| MGC57346        | MGC57346     | 339.6976809   | 457.0160643   |
| 485.7135296     | 431.7814349  |               |               |
| CISD2 CISD2     | 3307.952589  | 3723.157537   | 2361.603467   |
| 2552.978441     |              |               |               |
| MRI1 MRI1       | 1643.433953  | 1514.24656    | 823.2130043   |
| 1356.623329     |              |               |               |
| SLC9A2 SLC9A2   | 0 0          | 1.785711506   | 2.828262674   |
| LOC100507462    | LOC100507462 | 30.45565415   | 34.53010264   |
| 45.5356434      | 56.56525348  |               |               |
| DOPEY1 DOPEY1   | 678.2239905  | 432.6418742   | 876.7843495   |
| 687.2678298     |              |               |               |
| DLEU1 DLEU1     | 719.2219865  | 823.644507    | 533.0348846   |
| 568.4807975     |              |               |               |
| LOC101927722    | LOC101927722 | 28.11291152   | 5.07795627    |
| 1.785711506     | 36.76741476  |               |               |
| TBC1D23 TBC1D23 | 2648.47054   | 2654.755538   | 3137.495116   |
| 2905.568521     |              |               |               |
| OTUB1 OTUB1     | 9399.083419  | 11916.94778   | 7569.631074   |
| 7626.881678     |              |               |               |
| LINC00998       | LINC00998    | 1350.591124   | 1231.912191   |
| 1269.640881     | 1594.197394  |               |               |
| ATG7 ATG7       | 2899.144001  | 3044.74258    | 2195.532297   |
| 2423.821112     |              |               |               |
| LOC407835       | LOC407835    | 4.685485254   | 4.062365016   |
| 1.785711506     | 2.828262674  |               |               |
| SPAG17 SPAG17   | 241.3024906  | 343.2698439   | 368.749426    |
| 393.1285117     |              |               |               |
| LITAF LITAF     | 14547.26034  | 13212.84222   | 11174.08975   |
| 12689.47186     |              |               |               |
| RRBP1 RRBP1     | 1990.159862  | 1596.509451   | 1154.462489   |
| 1089.823884     |              |               |               |
| PIGU PIGU       | 1891.764671  | 2325.703972   | 1620.533192   |
| 1616.823495     |              |               |               |
| WFDC3 WFDC3     | 1.171371313  | 2.031182508   | 0 1.885508449 |
| COLCA1 COLCA1   | 0 0          | 0 5.656525348 |               |
| PSMD1 PSMD1     | 18883.67694  | 24401.61106   | 13254.44365   |
| 15460.22653     |              |               |               |
| GS1-24F4.2      | GS1-24F4.2   | 1.171371313   | 0 0           |
| 3.771016899     |              |               |               |
| LOC100652768    | LOC100652768 | 107.7661608   | 74.13816155   |
| 206.249679      | 207.4059294  |               |               |
| NAPRT NAPRT     | 2470.4221    | 1843.298126   | 1304.462255   |



|             |           |             |             |             |             |
|-------------|-----------|-------------|-------------|-------------|-------------|
| 2411.565307 |           |             |             |             |             |
| PLS3        | PLS3      | 730.9356996 | 119.839768  | 0           | 115.0160154 |
| HSF5        | HSF5      | 338.5263096 | 382.8779028 |             | 421.4279154 |
| 540.1981708 |           |             |             |             |             |
| LOC202181   | LOC202181 |             | 343.2117948 |             | 257.9601785 |
| 480.3563951 |           | 569.4235517 |             |             |             |
| GFPT1       | GFPT1     | 3389.948581 | 4275.63918  |             | 4828.563912 |
| 4216.939647 |           |             |             |             |             |
| P2RY11      | P2RY11    | 1761.742455 | 1815.877162 |             | 1514.283357 |
| 1416.016846 |           |             |             |             |             |
| BTG2        | BTG2      | 6391.001886 | 4823.042865 |             | 11492.83925 |
| 13583.20287 |           |             |             |             |             |
| YWHAE       | YWHAE     | 14993.55281 | 15478.6263  |             | 7858.023482 |
| 9976.225206 |           |             |             |             |             |
| SCAI        | SCAI      | 479.0908672 | 296.5526462 |             | 404.4636561 |
| 421.4111384 |           |             |             |             |             |
| CRB2        | CRB2      | 25.7701689  | 11.17150379 |             | 24.99996108 |
| 25.45436407 |           |             |             |             |             |
| TNKS1BP1    | TNKS1BP1  |             | 330.3267104 |             | 202.1026596 |
| 477.6778279 |           | 374.2734272 |             |             |             |
| DTWD2       | DTWD2     | 176.8770683 | 90.38762161 |             | 159.8211798 |
| 119.7297865 |           |             |             |             |             |
| DOK7        | DOK7      | 0           | 23.21424958 |             | 0.942754225 |
| INA         | INA       | 76.13913537 | 83.27848283 |             | 89.2855753  |
| 104.6457189 |           |             |             |             |             |
| FTCDNL1     | FTCDNL1   | 28.11291152 | 35.54569389 |             | 46.42849916 |
| 54.67974503 |           |             |             |             |             |
| CRNDE       | CRNDE     | 57.39719436 | 30.46773762 |             | 8.035701777 |
| 75.42033798 |           |             |             |             |             |
| RIC3        | RIC3      | 96.0524477  | 67.02902277 |             | 249.1067551 |
| 217.7762259 |           |             |             |             |             |
| ZNF724P     | ZNF724P   | 76.13913537 | 88.3564391  |             | 91.96414256 |
| 86.73338867 |           |             |             |             |             |
| FCGR1B      | FCGR1B    | 0           | 0           | 4.713771124 |             |
| DFNB59      | DFNB59    | 24.59879758 | 9.140321286 |             | 83.92844078 |
| 16.02682182 |           |             |             |             |             |
| ABHD16B     | ABHD16B   | 202.6472372 | 107.6526729 |             | 133.928363  |
| 129.1573288 |           |             |             |             |             |
| ORC2        | ORC2      | 1878.879587 | 1838.22017  |             | 1689.283085 |
| 2095.742642 |           |             |             |             |             |
| PIAS1       | PIAS1     | 4669.086055 | 5400.914289 |             | 6275.883088 |
| 6250.46051  |           |             |             |             |             |
| MRT04       | MRT04     | 3920.579786 | 5583.720715 |             | 4366.957488 |
| 4124.549733 |           |             |             |             |             |
| HAS2        | HAS2      | 0           | 2.031182508 | 0           | 0           |
| H3F3B       | H3F3B     | 66885.302   | 79730.00699 |             | 76771.30907 |
| 60962.25919 |           |             |             |             |             |
| TRAPPC12    | TRAPPC12  |             | 1618.835155 |             | 1632.055145 |
| 1237.498074 |           | 1162.415959 |             |             |             |
| BNIPL       | BNIPL     | 11.71371313 | 10.15591254 |             | 49.10706642 |

|                                   |             |             |             |             |  |   |
|-----------------------------------|-------------|-------------|-------------|-------------|--|---|
| 45.25220279                       |             |             |             |             |  |   |
| ATXN1L ATXN1L                     | 573.9719436 | 217.3365284 | 407.1422234 |             |  |   |
| 364.845885                        |             |             |             |             |  |   |
| ZNF860 ZNF860                     | 19.91331233 | 2.031182508 | 0.892855753 |             |  | 0 |
| GRWD1 GRWD1                       | 5957.5945   | 9818.736244 | 7932.13051  |             |  |   |
| 6409.785974                       |             |             |             |             |  |   |
| BEX5 BEX5                         | 52.71170911 | 155.3854619 | 337.4994746 |             |  |   |
| 133.8710999                       |             |             |             |             |  |   |
| IVD IVD                           | 3182.615859 | 3837.919349 | 2653.567298 |             |  |   |
| 2799.037293                       |             |             |             |             |  |   |
| NUP210L NUP210L                   | 21.08468364 | 11.17150379 | 40.17850889 |             |  |   |
| 18.85508449                       |             |             |             |             |  |   |
| ALPK2 ALPK2                       | 80.82462063 | 23.35859884 | 21.42853807 |             |  |   |
| 75.42033798                       |             |             |             |             |  |   |
| PPP1R36 PPP1R36                   | 9.370970508 | 13.2026863  | 1.785711506 |             |  |   |
| 0.942754225                       |             |             |             |             |  |   |
| CACNA2D4 CACNA2D4                 |             | 201.4758659 | 145.2295493 |             |  |   |
| 116.9641036                       | 221.5472428 |             |             |             |  |   |
| TNFSF12-TNFSF13 TNFSF12-TNFSF13   | 576.3146862 | 1315.190674 |             |             |  |   |
| 583.9276625                       | 681.6113045 |             |             |             |  |   |
| C6orf226 C6orf226                 |             | 352.5827654 | 254.9134048 |             |  |   |
| 222.3210825                       | 328.0784702 |             |             |             |  |   |
| LOC102724224 LOC102724224         |             | 2.342742627 | 0           | 0           |  | 0 |
| PCMTD2 PCMTD2                     | 1746.514628 | 1598.540634 | 2678.567259 |             |  |   |
| 2843.346742                       |             |             |             |             |  |   |
| SLC35B4 SLC35B4                   | 2075.669967 | 2389.686221 | 1680.354527 |             |  |   |
| 1603.624936                       |             |             |             |             |  |   |
| ZNF382 ZNF382                     | 370.1533351 | 278.2720036 | 459.8207128 |             |  |   |
| 537.3699081                       |             |             |             |             |  |   |
| PDGFRL PDGFRL                     | 0           | 2.031182508 | 31.24995136 | 0           |  |   |
| MIR4655 MIR4655                   | 2.342742627 | 0           | 0           | 2.828262674 |  |   |
| MIR4663 MIR4663                   | 4.685485254 | 0           | 2.678567259 | 0.942754225 |  |   |
| MIR4653 MIR4653                   | 1.171371313 | 0           | 0.892855753 | 0           |  |   |
| MIR4651 MIR4651                   | 0           | 0           | 3.571423012 | 0           |  |   |
| MIR4650-2 MIR4650-2               |             | 1.171371313 | 3.046773762 |             |  | 0 |
| 1.885508449                       |             |             |             |             |  |   |
| NEBL-AS1 NEBL-AS1                 |             | 0           | 0           | 0.892855753 |  | 0 |
| LOC100287042 LOC100287042         |             | 1562.609332 | 2262.737314 |             |  |   |
| 1517.85478                        | 1518.777056 |             |             |             |  |   |
| FAR2P2 FAR2P2                     | 1.171371313 | 0           | 0           | 1.885508449 |  |   |
| NDUFAF4P1 NDUFAF4P1               |             | 24.59879758 | 2.031182508 |             |  |   |
| 35.71423012                       | 32.05364364 |             |             |             |  |   |
| LOC339803 LOC339803               |             | 289.3287144 | 494.5929407 |             |  |   |
| 344.6423207                       | 171.5812689 |             |             |             |  |   |
| SLC9A9-AS1 SLC9A9-AS1             |             | 1.171371313 | 0           | 0           |  | 0 |
| TM4SF19-TCTEX1D2 TM4SF19-TCTEX1D2 |             |             | 427.5505294 |             |  |   |
| 420.4547792                       | 252.6781781 | 280.940759  |             |             |  |   |
| LINC00920 LINC00920               |             | 178.0484396 | 66.01343151 |             |  |   |
| 86.60700804                       | 302.6241061 |             |             |             |  |   |
| LOC100506100 LOC100506100         |             | 848.0728309 | 832.7848283 |             |  |   |

|             |          |             |             |             |             |
|-------------|----------|-------------|-------------|-------------|-------------|
| 261.6067356 |          | 386.5292321 |             |             |             |
| RBBP5       | RBBP5    | 3331.380015 | 2421.16955  |             | 3764.279855 |
| 3725.764696 |          |             |             |             |             |
| YBX3        | YBX3     | 2709.381848 | 2979.744739 |             | 1436.604907 |
| 1514.063285 |          |             |             |             |             |
| DDO         | DDO      | 7.028227881 | 0           | 0           | 0           |
| SMUG1       | SMUG1    | 1418.530661 | 1915.405105 |             | 1420.533503 |
| 1068.140537 |          |             |             |             |             |
| C5orf56     | C5orf56  | 667.6816487 | 760.6778493 |             | 2328.567804 |
| 1571.571293 |          |             |             |             |             |
| CNOT10      | CNOT10   | 3242.355796 | 4191.345105 |             | 3805.351219 |
| 4063.270709 |          |             |             |             |             |
| KIAA1549    | KIAA1549 |             | 33.96976809 |             | 16.24946006 |
| 55.35705669 |          | 40.53843166 |             |             |             |
| TPCN2       | TPCN2    | 1143.258402 | 1103.947693 |             | 607.1419121 |
| 772.11571   |          |             |             |             |             |
| CAMK1G      | CAMK1G   | 0           | 0           | 1.785711506 | 0           |
| NRIP3       | NRIP3    | 44.51210991 | 86.32525659 |             | 229.4639285 |
| 98.04643937 |          |             |             |             |             |
| ZNF527      | ZNF527   | 278.7863726 | 235.6171709 |             | 516.963481  |
| 417.6401215 |          |             |             |             |             |
| SPIRE2      | SPIRE2   | 46.85485254 | 37.5768764  |             | 11.60712479 |
| 3.771016899 |          |             |             |             |             |
| VIMP        | VIMP     | 2245.518808 | 3406.293066 |             | 3003.566753 |
| 2568.062508 |          |             |             |             |             |
| YRDC        | YRDC     | 3222.442483 | 4448.289693 |             | 3200.887875 |
| 3242.131779 |          |             |             |             |             |
| GJD4        | GJD4     | 0           | 0           | 0           | 0.942754225 |
| ZCCHC24     | ZCCHC24  | 87.85284851 | 50.7795627  |             | 146.4283435 |
| 89.56165135 |          |             |             |             |             |
| FLT3        | FLT3     | 0           | 1.015591254 | 0           | 25.45436407 |
| CLIC6       | CLIC6    | 17.5705697  | 13.2026863  |             | 2.678567259 |
| 50.90872813 |          |             |             |             |             |
| GLMN        | GLMN     | 1829.681992 | 1871.734681 |             | 1299.105121 |
| 1297.229813 |          |             |             |             |             |
| HEXDC       | HEXDC    | 1104.603149 | 988.1702902 |             | 1234.819506 |
| 1263.290661 |          |             |             |             |             |
| FAM196A     | FAM196A  | 0           | 1.015591254 | 0.892855753 | 0           |
| EML6        | EML6     | 9.370970508 | 18.28064257 |             | 14.28569205 |
| 21.68334717 |          |             |             |             |             |
| EML1        | EML1     | 2.342742627 | 4.062365016 |             | 41.07136464 |
| 48.08046546 |          |             |             |             |             |
| FAM224B     | FAM224B  | 1.171371313 | 0           | 0           | 3.771016899 |
| SNHG5       | SNHG5    | 3768.301515 | 434.6730567 |             | 1317.855091 |
| 3981.251091 |          |             |             |             |             |
| RRS1        | RRS1     | 1167.8572   | 1342.611638 |             | 1032.141251 |
| 1267.061678 |          |             |             |             |             |
| PHGDH       | PHGDH    | 3235.327568 | 2343.984614 |             | 1991.961185 |
| 1789.347519 |          |             |             |             |             |
| PLK2        | PLK2     | 261.2158029 | 115.777403  |             | 377.6779835 |

|             |             |             |             |             |             |
|-------------|-------------|-------------|-------------|-------------|-------------|
| 267.7421998 |             |             |             |             |             |
| JMJD6       | JMJD6       | 3774.158372 | 4967.256824 | 4525.885812 |             |
| 3848.322745 |             |             |             |             |             |
| ADPRM       | ADPRM       | 672.3671339 | 705.8359216 | 1323.212226 |             |
| 971.0368515 |             |             |             |             |             |
| EIF5A2      | EIF5A2      | 1170.199942 | 855.1278359 | 945.5342425 |             |
| 833.3947346 |             |             |             |             |             |
| MEGF11      | MEGF11      | 10.54234182 | 13.2026863  | 0           | 16.96957604 |
| ARIH20S     | ARIH20S     | 614.9699396 | 752.5531193 | 883.0343397 |             |
| 681.6113045 |             |             |             |             |             |
| C16orf92    | C16orf92    |             | 3.51411394  | 1.015591254 |             |
| 0.892855753 | 0.942754225 |             |             |             |             |
| ZNF862      | ZNF862      | 643.0828511 | 366.6284427 | 723.21316   |             |
| 727.8062615 |             |             |             |             |             |
| GEN1        | GEN1        | 1761.742455 | 1061.29286  | 760.7131016 |             |
| 978.5788853 |             |             |             |             |             |
| NANOS1      | NANOS1      | 126.5081019 | 94.44998663 | 91.07128681 |             |
| 76.3630922  |             |             |             |             |             |
| DRD2        | DRD2        | 9.370970508 | 10.15591254 | 0           | 0.942754225 |
| GMIP        | GMIP        | 8843.853417 | 9502.887364 | 4626.778512 |             |
| 6071.337207 |             |             |             |             |             |
| EXOC2       | EXOC2       | 6663.931402 | 6428.692638 | 7403.559904 |             |
| 7903.108666 |             |             |             |             |             |
| AK8         | AK8         | 14.05645576 | 43.67042392 | 6.249990271 |             |
| 21.68334717 |             |             |             |             |             |
| THUMPD3     | THUMPD3     | 2504.391868 | 2770.532941 | 1736.60444  |             |
| 2687.792295 |             |             |             |             |             |
| ITGB4       | ITGB4       | 23.42742627 | 40.62365016 | 29.46423985 |             |
| 6.599279573 |             |             |             |             |             |
| TTC21A      | TTC21A      | 180.3911823 | 128.9800893 | 74.1070275  |             |
| 106.5312274 |             |             |             |             |             |
| ANKRD44     | ANKRD44     | 10144.07557 | 7788.569327 | 5761.598174 |             |
| 7434.559816 |             |             |             |             |             |
| KDELC2      | KDELC2      | 2121.353449 | 1378.157332 | 1515.176213 |             |
| 2059.917981 |             |             |             |             |             |
| SLC6A4      | SLC6A4      | 5.856856567 | 0           | 0           | 1.885508449 |
| SEPT7-AS1   | SEPT7-AS1   |             | 10.54234182 | 19.29623383 |             |
| 30.3570956  | 18.85508449 |             |             |             |             |
| LINC01187   | LINC01187   |             | 0           | 3.046773762 | 4.464278765 |
| 0           |             |             |             |             |             |
| MMP23B      | MMP23B      | 2.342742627 | 0           | 0.892855753 | 2.828262674 |
| PCSK7       | PCSK7       | 7172.306552 | 7484.907542 | 5825.883789 |             |
| 7608.969348 |             |             |             |             |             |
| GPX6        | GPX6        | 0           | 1.015591254 | 0           | 0           |
| GJA5        | GJA5        | 0           | 0           | 15.1785478  | 1.885508449 |
| GFI1        | GFI1        | 4476.98116  | 4233.999938 | 4458.028775 |             |
| 6337.193899 |             |             |             |             |             |
| MIR6771     | MIR6771     | 2.342742627 | 1.015591254 | 2.678567259 |             |
| 4.713771124 |             |             |             |             |             |
| ANPEP       | ANPEP       | 84.33873457 | 310.7709237 | 18.74997081 |             |

|             |             |             |             |             |
|-------------|-------------|-------------|-------------|-------------|
| 15.0840676  |             |             |             |             |
| GART        | GART        | 14209.9054  | 16637.41592 | 12154.44537 |
| 14984.13565 |             |             |             |             |
| ANXA7       | ANXA7       | 17248.44259 | 21753.96466 | 16785.68816 |
| 16970.5188  |             |             |             |             |
| DHX30       | DHX30       | 11857.79181 | 14161.40445 | 9635.699287 |
| 10777.5663  |             |             |             |             |
| PNPLA2      | PNPLA2      | 1972.589292 | 1380.188514 | 2057.139655 |
| 1655.476419 |             |             |             |             |
| C12orf5     | C12orf5     | 2546.561235 | 3970.961803 | 2822.317035 |
| 2289.950012 |             |             |             |             |
| GPR84       | GPR84       | 3.51411394  | 3.046773762 | 42.85707615 |
| 4.713771124 |             |             |             |             |
| PARP11      | PARP11      | 588.0283994 | 348.3478001 | 1325.890793 |
| 1186.927569 |             |             |             |             |
| B9D2        | B9D2        | 658.3106782 | 832.7848283 | 575.8919607 |
| 449.6937652 |             |             |             |             |
| ARHGAP39    | ARHGAP39    |             | 1.171371313 | 7.109138778 |
| 1.785711506 | 6.599279573 |             |             |             |
| XPR1        | XPR1        | 1862.480388 | 930.2815887 | 1263.390891 |
| 877.7041832 |             |             |             |             |
| TMEM63C     | TMEM63C     | 0           | 1.015591254 | 0           |
| ATP10D      | ATP10D      | 549.373146  | 456.0004731 | 446.4278765 |
| 272.4559709 |             |             |             |             |
| TMEM160     | TMEM160     | 2537.190265 | 3300.671576 | 1801.78291  |
| 1463.154557 |             |             |             |             |
| C1orf109    | C1orf109    |             | 911.3268819 | 1222.77187  |
| 1749.997276 | 1517.834302 |             |             |             |
| MLLT1       | MLLT1       | 360.7823645 | 184.8376082 | 211.6068135 |
| 197.9783872 |             |             |             |             |
| MTMR1       | MTMR1       | 3340.750986 | 2176.412057 | 1950.88982  |
| 2229.613741 |             |             |             |             |
| NAPA        | NAPA        | 7720.508327 | 10080.75879 | 14328.54912 |
| 8910.912932 |             |             |             |             |
| DNAJC16     | DNAJC16     | 1267.423761 | 1083.635868 | 1504.461944 |
| 1350.966804 |             |             |             |             |
| ZNF880      | ZNF880      | 351.411394  | 760.6778493 | 1488.39054  |
| 954.0672754 |             |             |             |             |
| PRDM2       | PRDM2       | 3242.355796 | 2525.775449 | 3512.494532 |
| 3625.832748 |             |             |             |             |
| PDLIM4      | PDLIM4      | 91.36696245 | 86.32525659 | 158.0354683 |
| 252.6581322 |             |             |             |             |
| C3orf18     | C3orf18     | 654.7965642 | 1206.52241  | 1215.17668  |
| 1000.262232 |             |             |             |             |
| CALCR       | CALCR       | 0           | 0.892855753 | 0           |
| ANKRD65     | ANKRD65     | 1.171371313 | 0           | 6.599279573 |
| C12orf75    | C12orf75    |             | 15412.90374 | 16148.91653 |
| 1878.568504 | 3816.269102 |             |             |             |
| CLU         | CLU         | 557.5727452 | 71.09138778 | 73.21417175 |
| 242.2878358 |             |             |             |             |

|              |              |             |             |             |             |
|--------------|--------------|-------------|-------------|-------------|-------------|
| LSM1         | LSM1         | 3030.337588 | 3925.260197 | 2729.460037 |             |
| 2609.543694  |              |             |             |             |             |
| LOC100507472 | LOC100507472 |             | 1.171371313 | 25.38978135 |             |
| 5.357134518  | 0            |             |             |             |             |
| IDH1-AS1     | IDH1-AS1     |             | 30.45565415 | 33.51451138 |             |
| 13.3928363   | 28.28262674  |             |             |             |             |
| LOC374443    | LOC374443    |             | 1726.601316 | 1468.544953 |             |
| 2420.531946  | 1944.901966  |             |             |             |             |
| MATK         | MATK         | 147.5927855 | 232.5703972 | 364.2851472 |             |
| 581.6793566  |              |             |             |             |             |
| ACHE         | ACHE         | 3.51411394  | 0           | 0           | 7.542033798 |
| GNA12        | GNA12        | 3802.271283 | 4716.405784 | 3186.602183 |             |
| 3387.315929  |              |             |             |             |             |
| ARL4C        | ARL4C        | 21740.65158 | 30525.62632 | 10771.4118  |             |
| 12079.50988  |              |             |             |             |             |
| BLOC1S2      | BLOC1S2      | 3979.148352 | 4949.991772 | 4682.135569 |             |
| 3868.120584  |              |             |             |             |             |
| CSNK1A1L     | CSNK1A1L     |             | 0           | 0           | 1.785711506 |
| 0.942754225  |              |             |             |             |             |
| MIR4767      | MIR4767      | 2.342742627 | 21.32741634 | 11.60712479 |             |
| 5.656525348  |              |             |             |             |             |
| MIR4766      | MIR4766      | 0           | 1.015591254 | 0           | 2.828262674 |
| FAM45B       | FAM45B       | 3409.861893 | 4252.280581 | 1571.426125 |             |
| 2009.009253  |              |             |             |             |             |
| LINC00159    | LINC00159    |             | 0           | 1.015591254 | 0           |
| ACTR2        | ACTR2        | 38293.29961 | 25053.62065 | 15724.08267 | 0           |
| 18876.76784  |              |             |             |             |             |
| MIR6804      | MIR6804      | 64.42542224 | 62.96665775 | 28.5713841  |             |
| 29.22538097  |              |             |             |             |             |
| MIR6803      | MIR6803      | 9.370970508 | 12.18709505 | 17.85711506 |             |
| 6.599279573  |              |             |             |             |             |
| MIR6801      | MIR6801      | 10.54234182 | 7.109138778 | 8.92855753  |             |
| 4.713771124  |              |             |             |             |             |
| MIR6802      | MIR6802      | 74.96776406 | 69.06020528 | 64.28561422 |             |
| 48.08046546  |              |             |             |             |             |
| MIR6800      | MIR6800      | 158.1351273 | 161.4790094 | 83.92844078 |             |
| 98.9891936   |              |             |             |             |             |
| MIR6799      | MIR6799      | 2.342742627 | 0           | 4.464278765 | 0.942754225 |
| MIR6798      | MIR6798      | 19.91331233 | 54.84192772 | 28.5713841  |             |
| 23.56885562  |              |             |             |             |             |
| MIR6797      | MIR6797      | 19.91331233 | 23.35859884 | 57.14276819 |             |
| 18.85508449  |              |             |             |             |             |
| MIR6796      | MIR6796      | 22.25605496 | 18.28064257 | 13.3928363  |             |
| 13.19855915  |              |             |             |             |             |
| MIR6793      | MIR6793      | 0           | 7.109138778 | 1.785711506 | 0           |
| MIR6791      | MIR6791      | 12.88508445 | 24.3741901  | 30.3570956  |             |
| 16.96957604  |              |             |             |             |             |
| MIR6792      | MIR6792      | 0           | 0           | 0           | 0.942754225 |
| MIR6790      | MIR6790      | 12.88508445 | 16.24946006 | 21.42853807 |             |
| 15.0840676   |              |             |             |             |             |

|             |         |             |             |             |
|-------------|---------|-------------|-------------|-------------|
| MIR6789     | MIR6789 | 499.0041795 | 721.0697904 | 460.7135686 |
| 430.8386807 |         |             |             |             |
| MIR6787     | MIR6787 | 1.171371313 | 0           | 0           |
| MIR6786     | MIR6786 | 7.028227881 | 4.062365016 | 1.785711506 |
| 0.942754225 |         |             |             |             |
| MIR6785     | MIR6785 | 14.05645576 | 2.031182508 | 11.60712479 |
| 6.599279573 |         |             |             |             |
| UQCC2       | UQCC2   | 3319.666302 | 3649.019376 | 1752.675843 |
| 2105.170184 |         |             |             |             |
| CAMK2N2     | CAMK2N2 | 1.171371313 | 13.2026863  | 8.035701777 |
| 3.771016899 |         |             |             |             |
| DGCR6L      | DGCR6L  | 2887.430288 | 3866.355904 | 4063.386532 |
| 3076.207035 |         |             |             |             |
| JMY         | JMY     | 616.1413109 | 504.7488533 | 1091.962586 |
| 960.666555  |         |             |             |             |
| TMEM237     | TMEM237 | 1390.417749 | 1987.512084 | 615.1776138 |
| 822.081684  |         |             |             |             |
| UBR3        | UBR3    | 2028.815115 | 1341.596047 | 1200.890988 |
| 1541.403157 |         |             |             |             |
| FAM192A     | FAM192A | 5368.39473  | 6467.285106 | 3490.173139 |
| 4304.61579  |         |             |             |             |
| TMEM156     | TMEM156 | 1311.935871 | 1505.106239 | 650.891844  |
| 1049.285452 |         |             |             |             |
| GBA2        | GBA2    | 4132.597994 | 4363.995619 | 4577.671446 |
| 3960.510498 |         |             |             |             |
| MBOAT2      | MBOAT2  | 360.7823645 | 147.2607318 | 258.0353126 |
| 240.4023273 |         |             |             |             |
| ZNF215      | ZNF215  | 140.5645576 | 273.1940473 | 46.42849916 |
| 104.6457189 |         |             |             |             |
| WNT1        | WNT1    | 4.685485254 | 12.18709505 | 42.85707615 |
| 15.0840676  |         |             |             |             |
| PSD         | PSD     | 98.39519033 | 59.91988399 | 194.6425542 |
| 120.6725408 |         |             |             |             |
| FLNA        | FLNA    | 137530.7059 | 50553.08585 | 32296.3783  |
| 32997.34062 |         |             |             |             |
| AGPAT3      | AGPAT3  | 5514.816144 | 4599.61279  | 2874.995525 |
| 3293.983261 |         |             |             |             |
| SCAF11      | SCAF11  | 7387.838874 | 6548.532406 | 8430.34402  |
| 9578.382923 |         |             |             |             |
| PRCP        | PRCP    | 2810.119781 | 2870.060884 | 2707.138643 |
| 2139.109336 |         |             |             |             |
| DDX1        | DDX1    | 8963.333291 | 11226.34572 | 7364.274251 |
| 8315.092262 |         |             |             |             |
| DAPK1       | DAPK1   | 933.5829368 | 242.7263097 | 120.5355267 |
| 138.584871  |         |             |             |             |
| CTNS        | CTNS    | 1249.853191 | 2065.712611 | 1697.318787 |
| 1218.981213 |         |             |             |             |
| CDKN2B      | CDKN2B  | 303.3851702 | 1794.549746 | 208.0353905 |
| 130.100083  |         |             |             |             |
| ACSL5       | ACSL5   | 9201.121667 | 10181.30232 | 6129.454745 |

|              |              |             |             |             |             |
|--------------|--------------|-------------|-------------|-------------|-------------|
| 7174.35965   |              |             |             |             |             |
| GATA1        | GATA1        | 1.171371313 | 0           | 1.785711506 | 2.828262674 |
| DERL2        | DERL2        | 3035.023073 | 3725.18872  | 3102.673742 |             |
| 2746.243057  |              |             |             |             |             |
| MIB1         | MIB1         | 3289.210648 | 2755.299072 | 1541.06903  |             |
| 2741.529285  |              |             |             |             |             |
| GLYR1        | GLYR1        | 6419.114798 | 4747.889113 | 4533.921514 |             |
| 5029.593789  |              |             |             |             |             |
| ADAMTS16     | ADAMTS16     |             | 4.685485254 | 0           | 0.892855753 |
|              | 13.19855915  |             |             |             |             |
| ALG8         | ALG8         | 4452.382362 | 4694.062776 | 2569.638857 |             |
| 3453.308725  |              |             |             |             |             |
| NOP56        | NOP56        | 10610.28136 | 13964.37974 | 14073.19238 |             |
| 13115.59677  |              |             |             |             |             |
| LOC100506076 | LOC100506076 |             | 7.028227881 | 12.18709505 |             |
| 3.571423012  | 3.771016899  |             |             |             |             |
| LOC100128568 | LOC100128568 |             | 30.45565415 | 22.34300759 |             |
| 24.99996108  | 10.37029647  |             |             |             |             |
| WDR1         | WDR1         | 54678.44154 | 68937.31873 | 30366.91702 |             |
| 35676.64813  |              |             |             |             |             |
| HRK          | HRK          | 0           | 0           | 2.828262674 |             |
| HTR2B        | HTR2B        | 39.82662466 | 75.1537528  | 16.96425931 |             |
| 13.19855915  |              |             |             |             |             |
| TSPYL1       | TSPYL1       | 1176.056799 | 612.4015262 | 1217.855247 |             |
| 2034.463617  |              |             |             |             |             |
| TRPM2        | TRPM2        | 100.737933  | 632.7133513 | 234.821063  |             |
| 48.08046546  |              |             |             |             |             |
| USMG5        | USMG5        | 6319.548236 | 5835.587346 | 4264.279076 |             |
| 4756.195064  |              |             |             |             |             |
| NMBR         | NMBR         | 0           | 0           | 1.885508449 |             |
| FAU          | FAU          | 9443.595529 | 11715.86071 | 10615.16205 |             |
| 9205.05225   |              |             |             |             |             |
| ADCY9        | ADCY9        | 189.7621528 | 119.839768  | 214.2853807 |             |
| 235.6885562  |              |             |             |             |             |
| TRIM25       | TRIM25       | 4296.589978 | 1716.349219 | 1801.78291  |             |
| 1951.501245  |              |             |             |             |             |
| ERBB3        | ERBB3        | 19.91331233 | 32.49892013 | 206.249679  |             |
| 25.45436407  |              |             |             |             |             |
| C17orf104    | C17orf104    |             | 15.22782708 | 18.28064257 |             |
| 23.21424958  | 11.3130507   |             |             |             |             |
| COG6         | COG6         | 1591.893615 | 1493.934735 | 1408.033523 |             |
| 1860.054085  |              |             |             |             |             |
| FLJ45513     | FLJ45513     |             | 29.28428284 | 16.24946006 |             |
| 2.678567259  | 25.45436407  |             |             |             |             |
| CRLF3        | CRLF3        | 9197.607553 | 9038.762161 | 9423.199617 |             |
| 9391.717587  |              |             |             |             |             |
| RASD1        | RASD1        | 10.54234182 | 10.15591254 | 55.35705669 |             |
| 5.656525348  |              |             |             |             |             |
| PLXNC1       | PLXNC1       | 1526.296821 | 738.3348417 | 1046.426943 |             |
| 1308.542864  |              |             |             |             |             |



|             |             |             |             |             |
|-------------|-------------|-------------|-------------|-------------|
| CDK6        | CDK6        | 8508.841221 | 4916.477261 | 2749.102864 |
| 4013.304735 |             |             |             |             |
| GCA         | GCA         | 775.4478095 | 739.3504329 | 1171.426748 |
| 1199.183374 |             |             |             |             |
| MIRLET7I    | MIRLET7I    |             | 7.028227881 | 8.124730032 |
| 5.357134518 | 2.828262674 |             |             |             |
| MIR1225     | MIR1225     | 0           | 0           | 1.785711506 |
| MIR943      | MIR943      | 200.3044946 | 282.3343686 | 281.2495622 |
| 268.684954  |             |             |             |             |
| MIR942      | MIR942      | 2.342742627 | 0           | 0.892855753 |
| TMEM120A    | TMEM120A    |             | 2290.030918 | 1996.652405 |
| 1379.462138 | 1747.866333 |             |             |             |
| LOC115110   | LOC115110   |             | 1056.576925 | 884.5799823 |
| 652.6775555 | 905.0440557 |             |             |             |
| TMEM213     | TMEM213     | 2.342742627 | 7.109138778 | 0           |
| C17orf67    | C17orf67    |             | 185.0766675 | 186.8687907 |
| 517.8563368 | 348.8190631 |             |             |             |
| ERCC2       | ERCC2       | 470.891268  | 691.617644  | 339.2851862 |
| 390.300249  |             |             |             |             |
| FAM193B     | FAM193B     | 998.0083591 | 399.1273628 | 799.9987547 |
| 1143.560875 |             |             |             |             |
| AKR1C4      | AKR1C4      | 4.685485254 | 1.015591254 | 0           |
| COL1A2      | COL1A2      | 16.39919839 | 7.109138778 | 8.484788022 |
| 32.99639787 |             |             |             | 0.892855753 |
| PXT1        | PXT1        | 5.856856567 | 23.35859884 | 58.9284797  |
| 8.484788022 |             |             |             |             |
| TAF2        | TAF2        | 5814.6872   | 7191.40167  | 3965.172399 |
| 4395.120196 |             |             |             |             |
| DRD5        | DRD5        | 3.51411394  | 0           | 0           |
| RHBDD3      | RHBDD3      | 1548.552876 | 1886.96855  | 1187.498152 |
| 1114.335494 |             |             |             |             |
| KRT9        | KRT9        | 0           | 0           | 3.771016899 |
| MTM1        | MTM1        | 3124.047293 | 2958.417323 | 2593.745963 |
| 2673.650981 |             |             |             |             |
| KIFC2       | KIFC2       | 158.1351273 | 50.7795627  | 105.3569789 |
| 133.8710999 |             |             |             |             |
| UGT8        | UGT8        | 2.342742627 | 8.124730032 | 26.78567259 |
| 2.828262674 |             |             |             |             |
| ARHGEF18    | ARHGEF18    |             | 3218.928369 | 1950.950799 |
| 2415.174812 | 1998.638956 |             |             |             |
| RIMBP3B     | RIMBP3B     | 10.54234182 | 21.32741634 | 49.99992217 |
| 33.93915209 |             |             |             |             |
| ARSJ        | ARSJ        | 7.028227881 | 0           | 0           |
| POLR2J      | POLR2J      | 2909.686343 | 3556.600572 | 2467.853301 |
| 2168.334717 |             |             |             |             |
| SNHG16      | SNHG16      | 2410.682163 | 3193.018903 | 3670.530001 |
| 3915.258295 |             |             |             |             |
| C11orf80    | C11orf80    |             | 565.7723444 | 499.670897  |
| 650.891844  | 434.6096976 |             |             |             |
| AIM2        | AIM2        | 761.3913537 | 323.97361   | 732.1417175 |

|                |                |             |             |             |
|----------------|----------------|-------------|-------------|-------------|
| 1494.265446    |                |             |             |             |
| MAFG           | MAFG           | 1813.282793 | 2487.182981 | 2565.174578 |
| 1923.218618    |                |             |             |             |
| MAFK           | MAFK           | 226.0746635 | 68.04461402 | 79.46416202 |
| 125.3863119    |                |             |             |             |
| PDCD4          | PDCD4          | 7147.707755 | 8088.168747 | 31116.02299 |
| 27655.69518    |                |             |             |             |
| TMEFF1         | TMEFF1         | 70.28227881 | 97.49676039 | 58.9284797  |
| 94.27542247    |                |             |             |             |
| PHF2           | PHF2           | 549.373146  | 215.3053459 | 297.3209658 |
| 306.395123     |                |             |             |             |
| KIF15          | KIF15          | 4838.934896 | 3797.295699 | 1399.104965 |
| 2457.760264    |                |             |             |             |
| GNAT1          | GNAT1          | 0           | 0           | 0.942754225 |
| TMEM225        | TMEM225        | 0           | 0           | 3.571423012 |
| FAT1           | FAT1           | 9.370970508 | 0           | 0           |
| PSME4          | PSME4          | 1174.885427 | 990.2014727 | 1128.569672 |
| 850.3643107    |                |             |             |             |
| PSMC4          | PSMC4          | 10309.23893 | 13755.16794 | 7902.66627  |
| 8300.008194    |                |             |             |             |
| ALX3           | ALX3           | 8.199599194 | 2.031182508 | 0           |
| MCAM           | MCAM           | 247.1593471 | 76.16934405 | 7.542033798 |
| 167.810252     |                |             |             | 83.03558503 |
| FAM179B        | FAM179B        | 785.9901513 | 722.0853816 | 1244.64092  |
| 952.181767     |                |             |             |             |
| RSPH10B        | RSPH10B        | 4.685485254 | 3.046773762 | 11.60712479 |
| 5.656525348    |                |             |             |             |
| MAATS1         | MAATS1         | 3.51411394  | 1.015591254 | 50.89277792 |
| 68.8210584     |                |             |             |             |
| UGGT2          | UGGT2          | 16.39919839 | 3.046773762 | 0           |
| ZRANB2         | ZRANB2         | 5588.612537 | 4780.388033 | 11.3130507  |
| 7089.51177     |                |             |             | 5716.062531 |
| HIPK1-AS1      | HIPK1-AS1      |             | 59.73993699 | 50.7795627  |
| 108.9284019    |                | 37.71016899 |             |             |
| CHD3           | CHD3           | 2745.694359 | 1452.295493 | 2236.603661 |
| 2692.506066    |                |             |             |             |
| CDKL5          | CDKL5          | 21.08468364 | 29.45214637 | 114.2855364 |
| 86.73338867    |                |             |             |             |
| RPL36A-HNRNPH2 | RPL36A-HNRNPH2 |             | 12577.01379 | 12656.29821 |
| 18783.89933    |                | 16833.81944 |             |             |
| LOC158960      | LOC158960      |             | 69.11090749 | 78.20052656 |
| 107.1426904    |                | 96.16093092 |             |             |
| LINC01311      | LINC01311      |             | 51.54033779 | 23.35859884 |
| 47.32135491    |                | 81.07686333 |             |             |
| DDX11L5        | DDX11L5        | 3.51411394  | 2.031182508 | 3.571423012 |
| 12.25580492    |                |             |             |             |
| LINC00571      | LINC00571      |             | 1.171371313 | 1.015591254 |
| 0.892855753    |                | 0           |             |             |
| LIPE-AS1       | LIPE-AS1       |             | 32.79839678 | 31.48332888 |
| 84.82129654    |                | 46.19495701 |             |             |

|              |              |             |             |             |
|--------------|--------------|-------------|-------------|-------------|
| C1orf145     | C1orf145     | 0           | 6.093547524 | 41.07136464 |
| 21.68334717  |              |             |             |             |
| AKAP2        | AKAP2        | 6640.503976 | 5021.08316  | 4278.564769 |
| 5050.334382  |              |             |             |             |
| ADNP         | ADNP         | 1528.639564 | 1288.785301 | 1073.212615 |
| 1630.022055  |              |             |             |             |
| SH3GLB2      | SH3GLB2      | 2749.208473 | 2727.878108 | 1975.889781 |
| 2043.891159  |              |             |             |             |
| IGFL4        | IGFL4        | 0           | 0           | 1.885508449 |
| LOC101927667 | LOC101927667 |             | 3.51411394  | 3.046773762 |
| 2.678567259  | 7.542033798  |             |             |             |
| RUNX3        | RUNX3        | 9273.746689 | 10924.71512 | 9356.235436 |
| 9474.679958  |              |             |             |             |
| TRIM36       | TRIM36       | 2.342742627 | 14.21827756 | 39.28565313 |
| 7.542033798  |              |             |             |             |
| ZNF121       | ZNF121       | 194.447638  | 213.2741634 | 252.6781781 |
| 355.4183427  |              |             |             |             |
| SMC01        | SMC01        | 2.342742627 | 8.124730032 | 0           |
| C9orf84      | C9orf84      | 8.199599194 | 4.062365016 | 7.142846024 |
| 3.771016899  |              |             |             |             |
| PLEKHM3      | PLEKHM3      | 359.6109932 | 259.991361  | 655.3561227 |
| 424.2394011  |              |             |             |             |
| C5orf60      | C5orf60      | 0           | 0           | 3.771016899 |
| IL10RB       | IL10RB       | 4050.602002 | 4835.229961 | 3762.494143 |
| 4031.217065  |              |             |             |             |
| RP2          | RP2          | 1193.627368 | 1557.916984 | 1289.283707 |
| 1168.072484  |              |             |             |             |
| WWP1         | WWP1         | 1816.796907 | 1614.790094 | 2316.960679 |
| 1728.068494  |              |             |             |             |
| DCAF12       | DCAF12       | 5234.8584   | 5592.861036 | 3387.494727 |
| 3580.580545  |              |             |             |             |
| ICA1L        | ICA1L        | 269.4154021 | 243.741901  | 280.3567065 |
| 309.2233857  |              |             |             |             |
| DNM1         | DNM1         | 2.342742627 | 3.046773762 | 51.78563368 |
| 18.85508449  |              |             |             |             |
| C6orf99      | C6orf99      | 15.22782708 | 22.34300759 | 28.5713841  |
| 4.713771124  |              |             |             |             |
| IP011-LRRC70 | IP011-LRRC70 |             | 988.6373886 | 1047.074583 |
| 659.8204015  | 906.9295642  |             |             |             |
| NCLN         | NCLN         | 5746.747664 | 6012.300224 | 3436.601793 |
| 4375.322357  |              |             |             |             |
| PRMT6        | PRMT6        | 1950.333237 | 1990.558858 | 1893.747052 |
| 1955.272262  |              |             |             |             |
| NCL          | NCL          | 43161.51879 | 43992.36635 | 41120.47171 |
| 49744.42667  |              |             |             |             |
| UVSSA        | UVSSA        | 935.9256795 | 1398.469157 | 1366.962158 |
| 823.9671924  |              |             |             |             |
| TTC39A       | TTC39A       | 0           | 4.062365016 | 29.46423985 |
| MTFP1        | MTFP1        | 2509.077353 | 4450.320875 | 6.599279573 |
| 2044.833913  |              |             |             | 2501.78182  |

|             |             |             |             |             |             |
|-------------|-------------|-------------|-------------|-------------|-------------|
| CDKL3       | CDKL3       | 86.6814772  | 77.18493531 | 136.6069302 |             |
| 82.01961755 |             |             |             |             |             |
| MRPL51      | MRPL51      | 9199.950296 | 11376.65323 | 5986.597824 |             |
| 6340.022161 |             |             |             |             |             |
| MIR26B      | MIR26B      | 1.171371313 | 1.015591254 | 3.571423012 | 0           |
| JMJD1C-AS1  | JMJD1C-AS1  | 133.0355072 | 65.59679355 | 52.81074521 |             |
| 113.130507  |             |             |             |             |             |
| HEMGN       | HEMGN       | 39.82662466 | 24.3741901  | 170.5354488 |             |
| 116.9015239 |             |             |             |             |             |
| LRRC56      | LRRC56      | 32.79839678 | 35.54569389 | 52.67848943 |             |
| 80.1341091  |             |             |             |             |             |
| ALK         | ALK         | 4.685485254 | 1.015591254 | 4.464278765 |             |
| 7.542033798 |             |             |             |             |             |
| CHTF8       | CHTF8       | 10224.9002  | 11369.54409 | 10099.09142 |             |
| 8090.716757 |             |             |             |             |             |
| PIG0        | PIG0        | 3539.884109 | 4021.741366 | 2337.496361 |             |
| 2900.854749 |             |             |             |             |             |
| C17orf100   | C17orf100   |             | 114.7943887 | 101.5591254 |             |
| 180.3568621 | 196.0928787 |             |             |             |             |
| WDYHV1      | WDYHV1      | 804.7320923 | 674.3525927 | 407.1422234 |             |
| 583.5648651 |             |             |             |             |             |
| RMND5B      | RMND5B      | 1390.417749 | 2117.507765 | 1906.247033 |             |
| 2014.665778 |             |             |             |             |             |
| AMD1        | AMD1        | 8504.155736 | 7328.506489 | 5245.527549 |             |
| 7457.185917 |             |             |             |             |             |
| AMDHD2      | AMDHD2      | 1530.982307 | 1850.407265 | 1644.640297 |             |
| 1575.34231  |             |             |             |             |             |
| TANC1       | TANC1       | 32.79839678 | 29.45214637 | 24.99996108 |             |
| 66.93554995 |             |             |             |             |             |
| CERS5       | CERS5       | 3524.656282 | 4236.031121 | 3411.601832 |             |
| 3533.442834 |             |             |             |             |             |
| CYP4F3      | CYP4F3      | 0           | 4.062365016 | 184.8211409 | 0           |
| SLC17A1     | SLC17A1     | 0           | 0           | 16.07140355 | 0.942754225 |
| KCTD5       | KCTD5       | 3922.922529 | 5545.128247 | 3373.209035 |             |
| 2977.217842 |             |             |             |             |             |
| PKNOX1      | PKNOX1      | 1350.591124 | 1836.188987 | 2112.496712 |             |
| 1760.122138 |             |             |             |             |             |
| SSB         | SSB         | 3959.235039 | 3900.886007 | 5071.420677 |             |
| 5445.348402 |             |             |             |             |             |
| HIST1H1A    | HIST1H1A    |             | 715.7078725 | 383.893494  |             |
| 275.8924277 | 474.205375  |             |             |             |             |
| SRPK1       | SRPK1       | 8117.603202 | 7871.84781  | 5466.955776 |             |
| 7339.341639 |             |             |             |             |             |
| HIST1H1T    | HIST1H1T    |             | 2.342742627 | 0           | 0           |
| 0.942754225 |             |             |             |             |             |
| CXCL13      | CXCL13      | 518.9174919 | 64.99784026 | 209.821102  |             |
| 507.2017729 |             |             |             |             |             |
| ARFGEF2     | ARFGEF2     | 3652.335755 | 2127.663677 | 2916.959745 |             |
| 2531.295093 |             |             |             |             |             |
| PFKFB4      | PFKFB4      | 96.0524477  | 76.16934405 | 296.42811   |             |

|             |            |             |             |             |             |
|-------------|------------|-------------|-------------|-------------|-------------|
| 392.1857575 |            |             |             |             |             |
| PLA2G15     | PLA2G15    | 942.9539073 |             | 1698.068577 | 1566.961847 |
| 1164.301468 |            |             |             |             |             |
| KIAA1731NL  | KIAA1731NL |             |             | 1.171371313 | 6.093547524 |
| 7.142846024 |            | 0.942754225 |             |             |             |
| DIRAS2      | DIRAS2     | 0           | 0           | 0.892855753 | 0           |
| SNAI2       | SNAI2      | 0           | 2.031182508 | 0           | 0           |
| S100A4      | S100A4     | 23934.63005 |             | 15099.81077 | 4473.207323 |
| 10925.57871 |            |             |             |             |             |
| CLIP1       | CLIP1      | 4527.350127 |             | 4721.48374  | 5858.919451 |
| 7117.794397 |            |             |             |             |             |
| ST8SIA4     | ST8SIA4    | 6376.94543  |             | 7440.221527 | 2416.067668 |
| 3432.568132 |            |             |             |             |             |
| RHCE        | RHCE       | 241.3024906 |             | 259.991361  | 317.8566481 |
| 303.5668604 |            |             |             |             |             |
| CEP70       | CEP70      | 571.629201  |             | 582.9493798 | 388.3922526 |
| 363.9031307 |            |             |             |             |             |
| THUMPD1     | THUMPD1    | 3974.462867 |             | 4058.302651 | 5417.848709 |
| 5756.457296 |            |             |             |             |             |
| TTC27       | TTC27      | 2710.553219 |             | 3159.504391 | 2856.245554 |
| 3121.459238 |            |             |             |             |             |
| IP011       | IP011      | 3125.218664 |             | 3142.23934  | 2232.139383 |
| 2855.602547 |            |             |             |             |             |
| KERA        | KERA       | 0           | 0           | 0           | 2.828262674 |
| NOX3        | NOX3       | 0           | 0           | 4.464278765 | 0.942754225 |
| FAM98A      | FAM98A     | 3811.642254 |             | 4276.654771 | 3241.959239 |
| 3272.299914 |            |             |             |             |             |
| DNAJB4      | DNAJB4     | 288.1573431 |             | 280.3031861 | 1568.747558 |
| 785.3142692 |            |             |             |             |             |
| RER1        | RER1       | 8709.145716 |             | 10947.05813 | 7232.1316   |
| 7314.83003  |            |             |             |             |             |
| ME2         | ME2        | 7712.308728 |             | 8173.478413 | 6046.41916  |
| 7844.657904 |            |             |             |             |             |
| GIMAP5      | GIMAP5     | 8713.831201 |             | 9738.504535 | 13760.69287 |
| 13191.01711 |            |             |             |             |             |
| GIMAP4      | GIMAP4     | 11049.5456  |             | 9433.827159 | 15784.79686 |
| 13714.24571 |            |             |             |             |             |
| ANXA4       | ANXA4      | 2860.488747 |             | 4138.53436  | 1580.354683 |
| 2107.055692 |            |             |             |             |             |
| GMEB2       | GMEB2      | 2450.508788 |             | 2231.253985 | 2458.924744 |
| 2173.048488 |            |             |             |             |             |
| NHLH1       | NHLH1      | 24.59879758 |             | 5.07795627  | 0           |
| TM9SF1      | TM9SF1     | 3935.807613 |             | 5281.074521 | 2.828262674 |
| 3235.532499 |            |             |             |             | 3588.387271 |
| GPSM2       | GPSM2      | 2442.309189 |             | 2289.142687 | 671.4275263 |
| 1108.678968 |            |             |             |             |             |
| PI4K2B      | PI4K2B     | 4423.09808  |             | 3995.335993 | 2989.281061 |
| 2842.403988 |            |             |             |             |             |
| URB1        | URB1       | 1639.919839 |             | 1334.486908 | 945.5342425 |
| 1084.167358 |            |             |             |             |             |

|             |             |             |             |             |
|-------------|-------------|-------------|-------------|-------------|
| USP53       | USP53       | 468.5485254 | 234.6015797 | 1130.355383 |
| 1651.705402 |             |             |             |             |
| NUDT5       | NUDT5       | 7520.203832 | 9187.038484 | 4343.743238 |
| 5175.720694 |             |             |             |             |
| C16orf72    | C16orf72    |             | 2487.99267  | 1687.912664 |
| 2356.246332 | 2028.807092 |             |             |             |
| UGT2A1      | UGT2A1      | 0           | 4.062365016 | 0           |
| SYNM        | SYNM        | 197.961752  | 32.49892013 | 396.4279543 |
| 317.7081737 |             |             |             |             |
| TPTE        | TPTE        | 28.11291152 | 0           | 0.892855753 |
| CHMP4C      | CHMP4C      | 5.856856567 | 22.34300759 | 7.142846024 |
| 1.885508449 |             |             |             |             |
| USP51       | USP51       | 14.05645576 | 14.21827756 | 38.39279738 |
| 21.68334717 |             |             |             |             |
| GJD3        | GJD3        | 203.8186085 | 149.2919143 | 70.53560449 |
| 95.2181767  |             |             |             |             |
| PPIAL4C     | PPIAL4C     | 0           | 0           | 0.892855753 |
| NID1        | NID1        | 11.71371313 | 9.140321286 | 0           |
| ZNF35       | ZNF35       | 213.1895791 | 275.2252298 | 310.7138021 |
| 241.3450815 |             |             |             |             |
| LENG9       | LENG9       | 21.08468364 | 32.49892013 | 28.5713841  |
| 45.25220279 |             |             |             |             |
| TMEM133     | TMEM133     | 2.342742627 | 0           | 0           |
| NMUR2       | NMUR2       | 0           | 0           | 1.785711506 |
| FAM35A      | FAM35A      | 3213.071513 | 3486.524775 | 2391.960562 |
| 2644.4256   |             |             |             |             |
| TLN2        | TLN2        | 19.91331233 | 6.093547524 | 16.96425931 |
| 3.771016899 |             |             |             |             |
| DONSON      | DONSON      | 3717.932549 | 4177.126828 | 2199.10372  |
| 2734.930006 |             |             |             |             |
| HECW1       | HECW1       | 14.05645576 | 14.21827756 | 26.78567259 |
| 3.771016899 |             |             |             |             |
| DIS3        | DIS3        | 4905.703061 | 4916.477261 | 4989.277948 |
| 5224.743913 |             |             |             |             |
| VWA8        | VWA8        | 644.2542224 | 613.4171174 | 867.8557919 |
| 755.146134  |             |             |             |             |
| EMC4        | EMC4        | 6841.979842 | 8790.957895 | 7591.952468 |
| 6367.362034 |             |             |             |             |
| LOC729732   | LOC729732   |             | 3.51411394  | 5.07795627  |
| 23.21424958 | 13.19855915 |             |             |             |
| SCML2       | SCML2       | 286.9859718 | 229.5236234 | 287.4995525 |
| 220.6044886 |             |             |             |             |
| LEFTY2      | LEFTY2      | 0           | 6.093547524 | 8.035701777 |
| ZEB2        | ZEB2        | 938.2684221 | 363.581669  | 325.8923499 |
| 559.0532553 |             |             |             |             |
| MFAP2       | MFAP2       | 0           | 0           | 5.656525348 |
| DR1         | DR1         | 6000.935239 | 5816.291112 | 4849.99245  |
| 5440.634631 |             |             |             |             |
| EPHB3       | EPHB3       | 2.342742627 | 0           | 0           |
| MAN2A1      | MAN2A1      | 3255.24088  | 1994.621223 | 6.599279573 |
|             |             |             |             | 2124.103836 |

|                 |               |               |               |  |  |
|-----------------|---------------|---------------|---------------|--|--|
| 2022.207812     |               |               |               |  |  |
| HARBI1 HARBI1   | 488.4618377   | 528.1074521   | 634.8204404   |  |  |
| 444.9799941     |               |               |               |  |  |
| TTC9C TTC9C     | 1308.421757   | 1580.259991   | 1387.49784    |  |  |
| 1338.710999     |               |               |               |  |  |
| C2orf49 C2orf49 | 1176.056799   | 1114.103606   | 1233.926651   |  |  |
| 1278.374729     |               |               |               |  |  |
| SLC25A23        | SLC25A23      | 1110.460005   | 686.5396877   |  |  |
| 1315.176524     | 1504.635743   |               |               |  |  |
| WDR77 WDR77     | 4700.713081   | 6588.140465   | 5147.313416   |  |  |
| 5448.176665     |               |               |               |  |  |
| ABCA12 ABCA12   | 0 1.015591254 | 4.464278765   | 1.885508449   |  |  |
| POLR1C POLR1C   | 2012.415917   | 2789.829175   | 3396.423285   |  |  |
| 3069.607756     |               |               |               |  |  |
| BRI3BP BRI3BP   | 2054.585284   | 2665.927042   | 1199.105276   |  |  |
| 1152.045663     |               |               |               |  |  |
| CCM2L CCM2L     | 0 0           | 0 0.942754225 |               |  |  |
| SAMD10 SAMD10   | 1481.784712   | 1631.039554   | 669.6418148   |  |  |
| 1124.70579      |               |               |               |  |  |
| KIF20A KIF20A   | 5351.995531   | 6284.47868    | 1920.532725   |  |  |
| 3826.639398     |               |               |               |  |  |
| RIOK3 RIOK3     | 3823.355967   | 4177.126828   | 4835.706758   |  |  |
| 4375.322357     |               |               |               |  |  |
| HSBP1 HSBP1     | 4516.807785   | 4610.784293   | 3509.815965   |  |  |
| 3952.02571      |               |               |               |  |  |
| ZNF137P ZNF137P | 62.08267961   | 20.31182508   | 106.2498346   |  |  |
| 104.6457189     |               |               |               |  |  |
| DRAM1 DRAM1     | 558.7441165   | 793.1767694   | 750.8916883   |  |  |
| 578.851094      |               |               |               |  |  |
| MRPL18 MRPL18   | 4542.577954   | 6077.298064   | 5146.42056    |  |  |
| 4465.826762     |               |               |               |  |  |
| CROCC CROCC     | 289.3287144   | 250.8510398   | 856.2486672   |  |  |
| 839.9940142     |               |               |               |  |  |
| IFT172 IFT172   | 495.4900656   | 314.8332888   | 523.2134713   |  |  |
| 781.5432523     |               |               |               |  |  |
| SRP68 SRP68     | 10210.84374   | 14228.43347   | 9575.877951   |  |  |
| 9894.205588     |               |               |               |  |  |
| C6orf100        | C6orf100      | 0 1.015591254 | 1.785711506   |  |  |
| 0               |               |               |               |  |  |
| TLN1 TLN1       | 34345.77828   | 35904.1976    | 18678.54235   |  |  |
| 32722.05639     |               |               |               |  |  |
| KRT2 KRT2       | 5.856856567   | 5.07795627    | 0 0.942754225 |  |  |
| KRT10 KRT10     | 2492.678155   | 2784.751219   | 2520.531791   |  |  |
| 1988.26866      |               |               |               |  |  |
| ARRDC5 ARRDC5   | 12.88508445   | 15.23386881   | 178.5711506   |  |  |
| 85.79063445     |               |               |               |  |  |
| NTRK3 NTRK3     | 28.11291152   | 0 2.678567259 | 32.05364364   |  |  |
| RFC2 RFC2       | 5587.441165   | 7726.618261   | 4030.350869   |  |  |
| 3985.964862     |               |               |               |  |  |
| DEGS1 DEGS1     | 6775.211677   | 8390.814941   | 7241.953013   |  |  |

|              |              |             |             |             |             |
|--------------|--------------|-------------|-------------|-------------|-------------|
| 6422.041779  |              |             |             |             |             |
| LOC101928448 | LOC101928448 | 0           | 4.062365016 | 0           |             |
| 0.942754225  |              |             |             |             |             |
| SLC15A3      | SLC15A3      | 3.51411394  | 0           | 66.07132572 | 74.47758375 |
| PCDH12       | PCDH12       | 180.3911823 | 153.3542794 | 36.60708587 |             |
| 95.2181767   |              |             |             |             |             |
| MY010        | MY010        | 1.171371313 | 1.015591254 | 5.357134518 |             |
| 16.02682182  |              |             |             |             |             |
| AFF4         | AFF4         | 1615.321041 | 1587.36913  | 2886.60265  |             |
| 2042.005651  |              |             |             |             |             |
| SLC15A4      | SLC15A4      | 1366.990323 | 1911.34274  | 991.9627416 |             |
| 1716.755443  |              |             |             |             |             |
| RPS19BP1     | RPS19BP1     |             | 4018.974976 | 5971.676574 |             |
| 4333.921825  | 3689.940036  |             |             |             |             |
| EPN3         | EPN3         | 0           | 1.015591254 | 23.21424958 | 6.599279573 |
| DACH1        | DACH1        | 19.91331233 | 17.26505132 | 8.92855753  |             |
| 62.22177883  |              |             |             |             |             |
| IWS1         | IWS1         | 3447.345776 | 3820.654298 | 3700.887096 |             |
| 3883.204652  |              |             |             |             |             |
| PINX1        | PINX1        | 987.4660172 | 1715.333628 | 1612.49749  |             |
| 1334.939982  |              |             |             |             |             |
| CLN6         | CLN6         | 659.4820495 | 270.1472736 | 219.6425152 |             |
| 197.035633   |              |             |             |             |             |
| MAP7D1       | MAP7D1       | 7699.423643 | 4976.397145 | 3439.280361 |             |
| 3723.879188  |              |             |             |             |             |
| VPS37C       | VPS37C       | 158.1351273 | 83.27848283 | 131.2497957 |             |
| 77.30584643  |              |             |             |             |             |
| GPN2         | GPN2         | 1794.540852 | 2520.697493 | 1674.104537 |             |
| 1577.227818  |              |             |             |             |             |
| MAP3K12      | MAP3K12      | 809.4175776 | 440.7666043 | 404.4636561 |             |
| 497.7742306  |              |             |             |             |             |
| HEATR1       | HEATR1       | 7841.159572 | 5381.618055 | 6259.811684 |             |
| 7074.427702  |              |             |             |             |             |
| ANKRD24      | ANKRD24      | 65.59679355 | 48.74838019 | 86.60700804 |             |
| 43.36669434  |              |             |             |             |             |
| SLC17A5      | SLC17A5      | 741.4780414 | 961.7649176 | 1799.104342 |             |
| 1218.981213  |              |             |             |             |             |
| UBE2MP1      | UBE2MP1      | 3.51411394  | 5.07795627  | 2.678567259 |             |
| 1.885508449  |              |             |             |             |             |
| PGM5P2       | PGM5P2       | 22.25605496 | 19.29623383 | 40.17850889 |             |
| 45.25220279  |              |             |             |             |             |
| LOC100506548 | LOC100506548 |             | 249.5020898 | 270.1472736 |             |
| 516.963481   | 261.1429202  |             |             |             |             |
| PTPRZ1       | PTPRZ1       | 0           | 0           | 1.885508449 |             |
| SLC4A3       | SLC4A3       | 0           | 11.17150379 | 18.74997081 | 0.942754225 |
| PIGB         | PIGB         | 1720.744459 | 1636.11751  | 1320.533659 |             |
| 1543.288666  |              |             |             |             |             |
| ATP9A        | ATP9A        | 339.6976809 | 99.5279429  | 115.1783921 |             |
| 317.7081737  |              |             |             |             |             |
| LOC100652824 | LOC100652824 | 1.171371313 | 0           | 0           | 0           |



|                 |               |              |               |   |
|-----------------|---------------|--------------|---------------|---|
| TNFRSF10A       | TNFRSF10A     | 904.298654   | 1033.871897   |   |
| 3082.138059     | 2014.665778   |              |               |   |
| C9orf53 C9orf53 | 0 4.062365016 | 1.785711506  | 0             |   |
| NAPB NAPB       | 875.0143712   | 635.760125   | 1030.355539   |   |
| 993.6629528     |               |              |               |   |
| HLA-J HLA-J     | 10.54234182   | 9.140321286  | 24.10710533   |   |
| 36.76741476     |               |              |               |   |
| SEC14L1P1       | SEC14L1P1     | 51.54033779  | 34.53010264   |   |
| 123.2140939     | 81.07686333   |              |               |   |
| SLC45A3 SLC45A3 | 2.342742627   | 5.07795627   | 0.892855753   | 0 |
| SHISA2 SHISA2   | 60.9113083    | 36.56128515  | 63.39275847   |   |
| 0.942754225     |               |              |               |   |
| ZYG11A ZYG11A   | 17.5705697    | 3.046773762  | 1.785711506   |   |
| 1.885508449     |               |              |               |   |
| SMIM4 SMIM4     | 390.0666474   | 473.2655244  | 498.2135102   |   |
| 344.105292      |               |              |               |   |
| MPV17L MPV17L   | 11.71371313   | 1.015591254  | 0 6.599279573 |   |
| TTC36 TTC36     | 14.05645576   | 15.23386881  | 24.99996108   |   |
| 13.19855915     |               |              |               |   |
| RFPL3 RFPL3     | 1.171371313   | 3.046773762  | 17.85711506   |   |
| 10.37029647     |               |              |               |   |
| SCRN3 SCRN3     | 679.3953618   | 705.8359216  | 444.642165    |   |
| 486.46118       |               |              |               |   |
| ELAC2 ELAC2     | 8265.195988   | 12845.19818  | 7814.273551   |   |
| 7515.636679     |               |              |               |   |
| SLC37A2 SLC37A2 | 31.62702546   | 31.48332888  | 47.32135491   |   |
| 74.47758375     |               |              |               |   |
| ARHGEF12        | ARHGEF12      | 1292.022559  | 773.8805356   |   |
| 566.9634032     | 935.2121909   |              |               |   |
| IL16 IL16       | 6544.451528   | 16111.33965  | 15036.58374   |   |
| 14472.2201      |               |              |               |   |
| RNFT1 RNFT1     | 2243.176065   | 1869.703499  | 1748.211564   |   |
| 2153.250649     |               |              |               |   |
| ATP2B2 ATP2B2   | 0 0           | 0.892855753  | 8.484788022   |   |
| HMMR-AS1        | HMMR-AS1      | 692.2804463  | 724.1165641   |   |
| 251.7853224     | 543.0264334   |              |               |   |
| LOC101926933    | LOC101926933  | 8.199599194  | 11.17150379   |   |
| 17.85711506     | 38.65292321   |              |               |   |
| LOC729218       | LOC729218     | 433.407386   | 339.2074789   |   |
| 591.0705085     | 631.6453306   |              |               |   |
| OR10AD1 OR10AD1 | 0 0           | 1.785711506  | 0             |   |
| OR56B1 OR56B1   | 0 0           | 0 15.0840676 |               |   |
| OR52N4 OR52N4   | 4.685485254   | 11.17150379  | 138.3926417   |   |
| 160.2682182     |               |              |               |   |
| RPS24 RPS24     | 6696.729799   | 6845.085052  | 5591.062725   |   |
| 5810.194287     |               |              |               |   |
| HDAC5 HDAC5     | 1424.387517   | 1444.170763  | 6248.20456    |   |
| 3692.768298     |               |              |               |   |
| TMEM178B        | TMEM178B      | 48.02622385  | 28.43655511   |   |
| 28.5713841      | 41.48118589   |              |               |   |

|             |           |             |             |             |             |
|-------------|-----------|-------------|-------------|-------------|-------------|
| KCNA1       | KCNA1     | 1.171371313 | 0           | 0           | 0           |
| MVB12A      | MVB12A    | 1205.341082 | 1470.576136 |             | 924.9985601 |
| 768.3446931 |           |             |             |             |             |
| SYNDIG1L    | SYNDIG1L  |             | 0           | 0           | 21.42853807 |
| 16.02682182 |           |             |             |             |             |
| CWC22       | CWC22     | 2967.083537 | 3556.600572 |             | 3962.493832 |
| 4089.667827 |           |             |             |             |             |
| TGM2        | TGM2      | 0           | 45.70160643 | 224.106794  | 103.7029647 |
| SLC35D2     | SLC35D2   | 604.4275977 | 817.5509595 |             | 804.4630335 |
| 753.2606255 |           |             |             |             |             |
| NEK10       | NEK10     | 7.028227881 | 12.18709505 | 0           | 6.599279573 |
| GCC2        | GCC2      | 1985.474376 | 1579.2444   |             | 4874.992412 |
| 3802.127788 |           |             |             |             |             |
| CHCHD6      | CHCHD6    | 304.5565415 | 454.9848818 |             | 447.3207323 |
| 450.6365194 |           |             |             |             |             |
| MIEN1       | MIEN1     | 3614.851873 | 4075.567703 |             | 2468.746157 |
| 2482.271874 |           |             |             |             |             |
| LLPH        | LLPH      | 2823.004865 | 3687.611843 |             | 2646.424452 |
| 2607.658186 |           |             |             |             |             |
| ABO         | ABO       | 0           | 7.109138778 | 0           | 0           |
| MAP4K5      | MAP4K5    | 1044.863212 | 819.582142  |             | 1621.426048 |
| 1609.281462 |           |             |             |             |             |
| C2CD4A      | C2CD4A    | 32.79839678 | 12.18709505 |             | 17.85711506 |
| 76.3630922  |           |             |             |             |             |
| FAM199X     | FAM199X   | 1575.494417 | 1475.654092 |             | 1524.997626 |
| 1512.177776 |           |             |             |             |             |
| TMEM132E    | TMEM132E  |             | 2.342742627 | 0           | 12.49998054 |
| 5.656525348 |           |             |             |             |             |
| RECK        | RECK      | 503.6896648 | 621.5418475 |             | 1504.461944 |
| 1206.725408 |           |             |             |             |             |
| HAUS6       | HAUS6     | 2599.272945 | 2508.510398 |             | 2278.567882 |
| 2426.649374 |           |             |             |             |             |
| SPATA3      | SPATA3    | 45.68348122 | 19.29623383 | 0           | 14.14131337 |
| DNER        | DNER      | 2.342742627 | 0           | 25.89281684 | 0           |
| LRFN1       | LRFN1     | 289.3287144 | 276.2408211 |             | 593.7490758 |
| 344.105292  |           |             |             |             |             |
| PWP2        | PWP2      | 5202.060003 | 6723.214102 |             | 4513.385832 |
| 4813.703071 |           |             |             |             |             |
| SMIM11      | SMIM11    | 637.2259945 | 757.6310755 |             | 741.9631308 |
| 771.1729558 |           |             |             |             |             |
| YBEY        | YBEY      | 347.8972801 | 346.3166176 |             | 340.1780419 |
| 374.2734272 |           |             |             |             |             |
| PGLYRP2     | PGLYRP2   | 4.685485254 | 21.32741634 |             | 108.9284019 |
| 36.76741476 |           |             |             |             |             |
| ENKD1       | ENKD1     | 149.9355281 | 126.9489068 |             | 103.5712674 |
| 117.8442781 |           |             |             |             |             |
| PLA2G6      | PLA2G6    | 770.7623243 | 326.0047926 |             | 569.6419704 |
| 539.2554165 |           |             |             |             |             |
| CLCA3P      | CLCA3P    | 0           | 0           | 3.771016899 |             |
| POM121L8P   | POM121L8P | 0           | 0           | 0           | 3.771016899 |

|             |             |             |             |             |
|-------------|-------------|-------------|-------------|-------------|
| HLA-L       | HLA-L       | 10.54234182 | 5.07795627  | 18.74997081 |
| 3.771016899 |             |             |             |             |
| METTL12     | METTL12     | 201.4758659 | 104.6058992 | 216.963948  |
| 165.9247436 |             |             |             |             |
| LPCAT2      | LPCAT2      | 241.3024906 | 236.6327622 | 108.0355461 |
| 141.4131337 |             |             |             |             |
| AP2S1       | AP2S1       | 2886.258916 | 2099.227122 | 1083.034028 |
| 1109.621722 |             |             |             |             |
| TTC21B      | TTC21B      | 1757.05697  | 1386.282062 | 1462.497723 |
| 1552.716208 |             |             |             |             |
| EIF3J       | EIF3J       | 2428.252733 | 2422.185141 | 1856.247111 |
| 2410.622553 |             |             |             |             |
| WDR91       | WDR91       | 1235.796736 | 1027.778349 | 1433.033484 |
| 1491.437184 |             |             |             |             |
| TGFA        | TGFA        | 0           | 3.046773762 | 120.5355267 |
| 14.14131337 |             |             |             |             |
| DHX58       | DHX58       | 1945.647752 | 1810.799206 | 2271.425036 |
| 1877.023661 |             |             |             |             |
| AFAP1       | AFAP1       | 347.8972801 | 417.4080054 | 824.9987158 |
| 1143.560875 |             |             |             |             |
| MYLK4       | MYLK4       | 4.685485254 | 0           | 33.92851862 |
| 1.885508449 |             |             |             |             |
| SLC34A1     | SLC34A1     | 0           | 6.093547524 | 0           |
| 2.828262674 |             |             |             |             |
| TRMT1L      | TRMT1L      | 3029.166217 | 3332.154905 | 3001.781042 |
| 3316.609363 |             |             |             |             |
| LUZP6       | LUZP6       | 5817.029943 | 4175.095645 | 3399.101852 |
| 3825.696644 |             |             |             |             |
| DENND4A     | DENND4A     | 2297.059146 | 2075.868523 | 2531.24606  |
| 2479.443611 |             |             |             |             |
| NDUFA3      | NDUFA3      | 2473.936214 | 2799.985087 | 2386.603428 |
| 1874.195399 |             |             |             |             |
| ZACN        | ZACN        | 1533.325049 | 1365.970237 | 1086.605451 |
| 1266.118924 |             |             |             |             |
| MTURN       | MTURN       | 112.4516461 | 123.902133  | 366.9637145 |
| 294.1393181 |             |             |             |             |
| ZNF555      | ZNF555      | 121.8226166 | 114.7618117 | 603.570489  |
| 506.2590187 |             |             |             |             |
| TAB3        | TAB3        | 2849.946406 | 1443.155172 | 1405.354955 |
| 1656.419173 |             |             |             |             |
| RABEP2      | RABEP2      | 749.6776406 | 620.5262562 | 435.7136075 |
| 414.8118589 |             |             |             |             |
| LRP5L       | LRP5L       | 122.9939879 | 104.6058992 | 254.4638896 |
| 175.3522858 |             |             |             |             |
| CPT1A       | CPT1A       | 1774.62754  | 1129.337475 | 1070.534048 |
| 892.7882508 |             |             |             |             |
| CCDC154     | CCDC154     | 17.5705697  | 3.046773762 | 33.92851862 |
| 17.91233027 |             |             |             |             |
| NPM2        | NPM2        | 5.856856567 | 4.062365016 | 22.32139383 |
| 2.828262674 |             |             |             |             |
| HIST2H3D    | HIST2H3D    |             | 21.08468364 | 23.35859884 |
| 34.82137437 | 7.542033798 |             |             |             |
| HMSD        | HMSD        | 76.13913537 | 75.1537528  | 97.32127708 |

|                 |                |             |             |             |             |
|-----------------|----------------|-------------|-------------|-------------|-------------|
| 111.2449985     |                |             |             |             |             |
| ARHGAP10        | ARHGAP10       |             | 1205.341082 |             | 1263.39552  |
| 443.7493093     | 584.5076193    |             |             |             |             |
| PANK3 PANK3     | 1234.625364    |             | 952.6245963 |             | 967.8556363 |
| 862.6201156     |                |             |             |             |             |
| MCL1 MCL1       | 25607.34828    |             | 12382.08857 |             | 16099.08208 |
| 20289.95642     |                |             |             |             |             |
| MSANTD3-TMEFF1  | MSANTD3-TMEFF1 |             | 196.7903807 |             | 294.5214637 |
| 236.6067746     | 286.5972843    |             |             |             |             |
| LRFN4 LRFN4     | 521.2602345    |             | 381.8623115 |             | 170.5354488 |
| 293.1965639     |                |             |             |             |             |
| FUNDC2 FUNDC2   | 3172.073517    |             | 4085.723615 |             | 4096.422195 |
| 3594.721859     |                |             |             |             |             |
| MRPL24 MRPL24   | 2381.39788     |             | 2788.813584 |             | 2355.353476 |
| 2753.78509      |                |             |             |             |             |
| TIGD2 TIGD2     | 130.0222158    |             | 205.1494333 |             | 299.999533  |
| 330.9067329     |                |             |             |             |             |
| GAMT GAMT       | 788.332894     |             | 802.3170907 |             | 416.0707809 |
| 760.8026593     |                |             |             |             |             |
| TMEM151A        | TMEM151A       | 0           | 0           | 5.357134518 | 0           |
| EIF3F EIF3F     | 5684.664984    |             | 7248.27478  |             | 6465.168508 |
| 6003.458903     |                |             |             |             |             |
| EIF3B EIF3B     | 20465.02822    |             | 28078.0514  |             | 18840.14924 |
| 19719.59012     |                |             |             |             |             |
| YES1 YES1       | 361.9537359    |             | 272.1784561 |             | 745.5345538 |
| 546.7974503     |                |             |             |             |             |
| ZNF787 ZNF787   | 188.5907815    |             | 72.10697904 |             | 81.24987353 |
| 79.19135488     |                |             |             |             |             |
| TIAL1 TIAL1     | 1439.615344    |             | 590.0585186 |             | 700.8917661 |
| 775.8867269     |                |             |             |             |             |
| THRA THRA       | 110.1089035    |             | 96.48116913 |             | 398.2136659 |
| 296.9675808     |                |             |             |             |             |
| THBS2 THBS2     | 0              | 4.062365016 | 0           | 3.771016899 |             |
| PANX3 PANX3     | 1.171371313    | 0           | 0           | 0           |             |
| RBP7 RBP7       | 0              | 4.062365016 | 0           | 0           |             |
| ACRC ACRC       | 74.96776406    |             | 72.10697904 |             | 118.7498152 |
| 46.19495701     |                |             |             |             |             |
| SFTPFB SFTPFB   | 1.171371313    |             | 3.046773762 | 0           | 2.828262674 |
| PLEKHA1 PLEKHA1 | 249.5020898    |             | 442.7977868 |             | 3131.245126 |
| 1539.517649     |                |             |             |             |             |
| SUMF1 SUMF1     | 632.5405093    |             | 762.7090318 |             | 1058.034067 |
| 1002.147741     |                |             |             |             |             |
| SNORD38A        | SNORD38A       |             | 28.11291152 |             | 26.40537261 |
| 53.57134518     | 47.13771124    |             |             |             |             |
| ANXA2P3 ANXA2P3 | 2.342742627    |             | 2.031182508 | 0           | 0           |
| TSPAN31 TSPAN31 | 1336.534669    |             | 1710.255672 |             | 1886.604206 |
| 1813.859128     |                |             |             |             |             |
| SLC25A34        | SLC25A34       |             | 25.7701689  |             | 12.18709505 |
| 26.78567259     | 33.93915209    |             |             |             |             |
| SMARCA5 SMARCA5 | 14781.5346     |             | 14477.25333 |             | 14159.79939 |

|                 |               |   |               |   |             |
|-----------------|---------------|---|---------------|---|-------------|
| 14444.88023     |               |   |               |   |             |
| EIF4ENIF1       | EIF4ENIF1     |   | 2340.399884   |   | 2902.559804 |
| 1727.675882     | 2023.150566   |   |               |   |             |
| BRD8 BRD8       | 4855.334094   |   | 4432.040233   |   | 3997.315206 |
| 4281.046934     |               |   |               |   |             |
| KIAA1586        | KIAA1586      |   | 1061.26241    |   | 807.395047  |
| 791.0701972     | 788.1425319   |   |               |   |             |
| SLC2A14 SLC2A14 | 167.5060978   |   | 3.046773762   |   | 13.3928363  |
| 103.7029647     |               |   |               |   |             |
| SAT1 SAT1       | 7307.014253   |   | 8092.231112   |   | 8574.986652 |
| 7824.860065     |               |   |               |   |             |
| LOC154761       | LOC154761     |   | 448.6352131   |   | 830.7536458 |
| 969.6413478     | 609.0192292   |   |               |   |             |
| CABP7 CABP7     | 852.7583162   |   | 1248.161651   |   | 861.6058017 |
| 679.725796      |               |   |               |   |             |
| RARRES1 RARRES1 | 7.028227881   | 0 | 36.60708587   |   | 1.885508449 |
| NUDT9P1 NUDT9P1 | 7.028227881   |   | 10.15591254   |   | 35.71423012 |
| 27.33987252     |               |   |               |   |             |
| SNORD42A        | SNORD42A      |   | 1.171371313   |   | 2.031182508 |
| 1.785711506     | 0.942754225   |   |               |   |             |
| SNORD42B        | SNORD42B      |   | 16.39919839   |   | 26.40537261 |
| 25.89281684     | 21.68334717   |   |               |   |             |
| PSMB6 PSMB6     | 16038.41602   |   | 23199.15102   |   | 11279.44673 |
| 10669.14956     |               |   |               |   |             |
| RPL23A RPL23A   | 20376.004     |   | 23545.46763   |   | 27894.59944 |
| 26095.43694     |               |   |               |   |             |
| FGF5 FGF5       | 0 0           |   | 0.892855753   |   | 0           |
| R3HCC1 R3HCC1   | 1850.766675   |   | 2893.419483   |   | 1748.211564 |
| 1794.06129      |               |   |               |   |             |
| CPA4 CPA4       | 1.171371313   | 0 | 0             |   | 0           |
| LSAMP LSAMP     | 0 1.015591254 |   | 0             |   | 0.942754225 |
| SPATA20 SPATA20 | 843.3873457   |   | 484.4370282   |   | 753.5702556 |
| 1033.25863      |               |   |               |   |             |
| COL3A1 COL3A1   | 14.05645576   |   | 14.21827756   | 0 | 0.942754225 |
| COL4A1 COL4A1   | 0 0           |   | 0 0.942754225 |   |             |
| SNORD5 SNORD5   | 2.342742627   |   | 6.093547524   |   | 24.99996108 |
| 16.02682182     |               |   |               |   |             |
| SNORA32 SNORA32 | 12.88508445   |   | 4.062365016   |   | 20.53568232 |
| 29.22538097     |               |   |               |   |             |
| PTPRVP PTPRVP   | 10.54234182   |   | 5.07795627    |   | 18.74997081 |
| 22.62610139     |               |   |               |   |             |
| LINC00636       | LINC00636     | 0 | 2.031182508   | 0 | 0           |
| C1D C1D         | 2251.375664   |   | 897.7826686   |   | 762.4988131 |
| 1817.630145     |               |   |               |   |             |
| B3GAT2 B3GAT2   | 92.53833376   |   | 161.4790094   |   | 179.4640064 |
| 98.04643937     |               |   |               |   |             |
| TREX2 TREX2     | 37.48388203   |   | 32.49892013   |   | 65.17846997 |
| 56.56525348     |               |   |               |   |             |
| ZNF469 ZNF469   | 29.28428284   |   | 9.140321286   |   | 24.99996108 |
| 16.02682182     |               |   |               |   |             |

|              |              |             |             |             |   |
|--------------|--------------|-------------|-------------|-------------|---|
| PARK7        | PARK7        | 20072.61883 | 28336.01158 | 14526.7631  |   |
| 15628.03678  |              |             |             |             |   |
| FAM201A      | FAM201A      | 9.370970508 | 6.093547524 | 38.39279738 |   |
| 28.28262674  |              |             |             |             |   |
| SLC40A1      | SLC40A1      | 147.5927855 | 423.5015529 | 4095.529339 |   |
| 2347.45802   |              |             |             |             |   |
| ZBTB46       | ZBTB46       | 70.28227881 | 27.42096386 | 44.64278765 |   |
| 19.79783872  |              |             |             |             |   |
| CFP          | CFP          | 140.5645576 | 145.2295493 | 101.7855558 |   |
| 107.4739816  |              |             |             |             |   |
| ZNF44        | ZNF44        | 713.3651299 | 742.3972067 | 2749.102864 |   |
| 2066.517261  |              |             |             |             |   |
| NHSL1        | NHSL1        | 9.370970508 | 2.031182508 | 4.464278765 |   |
| 8.484788022  |              |             |             |             |   |
| NINJ1        | NINJ1        | 8108.232232 | 9862.406668 | 6386.597201 |   |
| 6274.97212   |              |             |             |             |   |
| HTT-AS       | HTT-AS       | 1.171371313 | 0           | 28.5713841  | 0 |
| LOC100289495 | LOC100289495 | 7.142846024 | 2.342742627 | 10.15591254 |   |
| 13.19855915  |              |             |             |             |   |
| MIR3654      | MIR3654      | 3733.160376 | 5763.480367 | 5709.812541 |   |
| 5063.532941  |              |             |             |             |   |
| KLRC4-KLRK1  | KLRC4-KLRK1  | 2556.246021 | 7.028227881 | 854.1122447 |   |
| 84.84788022  |              |             |             |             |   |
| EPPIN-WFDC6  | EPPIN-WFDC6  | 507.2037787 | 1.171371313 | 0           | 0 |
| 1670.560486  |              |             | 259.991361  | 2179.460893 | 0 |
| LRP11        | LRP11        | 229.5887774 | 147.2607318 | 596.427643  |   |
| 481.7474088  |              |             |             |             |   |
| ORAI2        | ORAI2        | 7725.193812 | 10260.51844 | 5974.990699 |   |
| 5808.308778  |              |             |             |             |   |
| IL9          | IL9          | 0           | 13.2026863  | 343.7494649 | 0 |
| MCM6         | MCM6         | 17738.0758  | 21413.74159 | 10187.48414 |   |
| 15018.0748   |              |             |             |             |   |
| CSDC2        | CSDC2        | 0           | 5.07795627  | 0           | 0 |
| RPL7         | RPL7         | 21207.67763 | 30656.63759 | 30543.70246 |   |
| 26998.59549  |              |             |             |             |   |
| LIFR         | LIFR         | 5.856856567 | 0           | 29.46423985 | 0 |
| PRDM1        | PRDM1        | 11486.4671  | 13043.23848 | 3366.959045 |   |
| 6496.519363  |              |             |             |             |   |
| SLC25A35     | SLC25A35     | 2702.674364 | 3231.813454 | 4505.162803 |   |
| 2710.418396  |              |             |             |             |   |
| LOC102724927 | LOC102724927 | 5691.693212 | 2.342742627 | 0           | 0 |
| 2737.758269  |              |             | 3728.235494 | 2977.673936 | 0 |
| SSRP1        | SSRP1        | 8278.081072 | 10864.79524 | 7105.346083 |   |
| 5986.489327  |              |             |             |             |   |
| LOC101927211 | LOC101927211 | 0.892855753 | 5.856856567 | 3.046773762 |   |
| 0            | 0            |             |             |             |   |
| TRIM59       | TRIM59       | 2572.331404 | 1478.700866 | 1059.819779 |   |
| 1317.027652  |              |             |             |             |   |

|                 |              |               |               |
|-----------------|--------------|---------------|---------------|
| LOC100129917    | LOC100129917 | 338.5263096   | 307.72415     |
| 1161.605335     | 578.851094   |               |               |
| TXNDC8 TXNDC8   | 2.342742627  | 0 0           | 0             |
| MIR1282 MIR1282 | 10291.66836  | 13638.37495   | 9726.770574   |
| 8977.848482     |              |               |               |
| IRF5 IRF5       | 1491.155682  | 2239.378715   | 1412.497801   |
| 1756.351121     |              |               |               |
| ZFP28 ZFP28     | 26.94154021  | 84.29407409   | 609.8204793   |
| 283.7690216     |              |               |               |
| LOC101927905    | LOC101927905 | 18.74194102   | 12.18709505   |
| 49.99992217     | 21.68334717  |               |               |
| EN03 EN03       | 162.8206126  | 89.37203036   | 154.4640453   |
| 111.2449985     |              |               |               |
| ZCCHC4 ZCCHC4   | 1202.998339  | 1149.6493     | 933.9271177   |
| 1257.634136     |              |               |               |
| PITPNM3 PITPNM3 | 9.370970508  | 0 3.571423012 | 9.427542247   |
| MZT2B MZT2B     | 4519.150527  | 5762.464775   | 2917.852601   |
| 3032.840341     |              |               |               |
| ERICH6 ERICH6   | 17.5705697   | 21.32741634   | 25.89281684   |
| 15.0840676      |              |               |               |
| UBE2NL UBE2NL   | 1.171371313  | 3.046773762   | 0 3.771016899 |
| PRMT5-AS1       | PRMT5-AS1    | 3118.190436   | 4604.690746   |
| 3360.709054     | 3359.033303  |               |               |
| SNORD109A       | SNORD109A    | 0 1.015591254 | 1.785711506   |
| 1.885508449     |              |               |               |
| SNORD64 SNORD64 | 5.856856567  | 1.015591254   | 5.357134518   |
| 4.713771124     |              |               |               |
| APOC2 APOC2     | 0 0          | 4.464278765   | 1.885508449   |
| OPN3 OPN3       | 1391.58912   | 1423.858938   | 1052.676933   |
| 1026.659351     |              |               |               |
| WDR37 WDR37     | 1958.532836  | 2237.347533   | 2455.353321   |
| 2099.513658     |              |               |               |
| MMP25 MMP25     | 746.1635267  | 588.0273361   | 313.3923693   |
| 420.4683842     |              |               |               |
| KIAA1328        | KIAA1328     | 165.1633552   | 205.1494333   |
| 163.3926028     | 168.7530062  |               |               |
| ACTL9 ACTL9     | 0 0          | 12.49998054   | 0             |
| KCTD16 KCTD16   | 7.028227881  | 5.07795627    | 15.1785478    |
| 0.942754225     |              |               |               |
| NTN3 NTN3       | 1.171371313  | 0 0           | 0             |
| NRL NRL         | 115.96576    | 118.8241767   | 174.9997276   |
| 88.61889712     |              |               |               |
| VTI1B VTI1B     | 3938.150356  | 4715.390193   | 3736.601326   |
| 4203.741088     |              |               |               |
| DPH7 DPH7       | 1903.478384  | 2395.779768   | 2382.139149   |
| 2338.973232     |              |               |               |
| ALKBH8 ALKBH8   | 988.6373886  | 973.9520126   | 1374.99786    |
| 1390.562481     |              |               |               |
| PPAP2C PPAP2C   | 4.685485254  | 2.031182508   | 18.74997081   |
| 27.33987252     |              |               |               |

|          |          |             |             |             |             |
|----------|----------|-------------|-------------|-------------|-------------|
| OTX1     | OTX1     | 3.51411394  | 11.17150379 | 0           | 0           |
| PROKR1   | PROKR1   | 0           | 2.031182508 | 0           | 0           |
| CREBRF   | CREBRF   | 1146.772516 | 1070.433182 | 9915.163137 |             |
|          |          | 6266.487332 |             |             |             |
| MYOCD    | MYOCD    | 0           | 0           | 1.785711506 | 0           |
| COG7     | COG7     | 1627.034754 | 2005.792727 | 1335.712207 |             |
|          |          | 1541.403157 |             |             |             |
| AKAP7    | AKAP7    | 240.1311193 | 188.8999733 | 187.4997081 |             |
|          |          | 313.9371568 |             |             |             |
| MTMR4    | MTMR4    | 5814.6872   | 5720.825534 | 4920.528055 |             |
|          |          | 5134.239508 |             |             |             |
| MTMR6    | MTMR6    | 6146.185282 | 6273.307176 | 3967.850966 |             |
|          |          | 4809.932054 |             |             |             |
| CEL      | CEL      | 10.54234182 | 6.093547524 | 17.85711506 |             |
|          |          | 6.599279573 |             |             |             |
| ONECUT2  | ONECUT2  | 11.71371313 | 0           | 0           | 0           |
| POU2F1   | POU2F1   | 770.7623243 | 821.6133245 | 1210.712401 |             |
|          |          | 1055.884732 |             |             |             |
| NFYB     | NFYB     | 2606.301172 | 2365.312031 | 2297.317853 |             |
|          |          | 2761.327124 |             |             |             |
| PPL      | PPL      | 19.91331233 | 3.046773762 | 12.49998054 |             |
|          |          | 5.656525348 |             |             |             |
| CGN      | CGN      | 46.85485254 | 66.01343151 | 174.9997276 |             |
|          |          | 67.87830418 |             |             |             |
| BLOC1S4  | BLOC1S4  | 1921.048954 | 2834.51519  | 3127.673703 |             |
|          |          | 2585.032084 |             |             |             |
| IGLON5   | IGLON5   | 1.171371313 | 0           | 0           | 0           |
| C17orf51 | C17orf51 | 581.6793566 | 531.8025763 | 643.8848551 |             |
|          |          | 988.3913186 |             |             |             |
| XKRX     | XKRX     | 16.39919839 | 7.109138778 | 0           | 12.25580492 |
| BOLA3    | BOLA3    | 1869.508616 | 2369.374396 | 1171.426748 |             |
|          |          | 1283.0885   |             |             |             |
| BLOC1S3  | BLOC1S3  | 597.3993699 | 627.635395  | 1246.426631 |             |
|          |          | 696.6953721 |             |             |             |
| SLC36A4  | SLC36A4  | 1057.748296 | 979.0299689 | 883.0343397 |             |
|          |          | 1142.61812  |             |             |             |
| CPA6     | CPA6     | 8.199599194 | 2.031182508 | 0           | 0           |
| SYNE2    | SYNE2    | 6029.04815  | 6285.494271 | 13973.19253 |             |
|          |          | 13008.12279 |             |             |             |
| GPRIN3   | GPRIN3   | 8964.504662 | 4660.548265 | 1602.676077 |             |
|          |          | 3977.480074 |             |             |             |
| TMEM17   | TMEM17   | 18.74194102 | 7.109138778 | 0           | 23.56885562 |
| PON3     | PON3     | 5.856856567 | 4.062365016 | 14.28569205 |             |
|          |          | 7.542033798 |             |             |             |
| TMEM143  | TMEM143  | 795.3611218 | 982.0767427 | 773.2130821 |             |
|          |          | 870.1621494 |             |             |             |
| RSC1A1   | RSC1A1   | 930.0688229 | 978.0143777 | 825.8915716 |             |
|          |          | 731.5772784 |             |             |             |
| METTL16  | METTL16  | 1967.903807 | 1875.797046 | 3266.066345 |             |
|          |          | 2234.327513 |             |             |             |



|                   |             |             |               |
|-------------------|-------------|-------------|---------------|
| ASPSCR1 ASPSCR1   | 1377.532665 | 1880.875003 | 1679.461671   |
| 1316.084898       |             |             |               |
| NCAPD2 NCAPD2     | 20220.21161 | 21194.37388 | 8334.808455   |
| 11964.49387       |             |             |               |
| PKD2 PKD2         | 1048.377326 | 1714.318037 | 857.1415229   |
| 877.7041832       |             |             |               |
| MIR423 MIR423     | 2.342742627 | 4.062365016 | 3.571423012   |
| 17.91233027       |             |             |               |
| MIR132 MIR132     | 0 0         | 0.892855753 | 0             |
| MIR128-1 MIR128-1 |             | 0 0         | 0.892855753   |
| 2.828262674       |             |             |               |
| HCST HCST         | 3411.033265 | 3818.623115 | 1858.032822   |
| 2350.286282       |             |             |               |
| PHTF1 PHTF1       | 2192.807099 | 2608.03834  | 1375.890715   |
| 1715.812689       |             |             |               |
| KLF1 KLF1         | 19.91331233 | 27.42096386 | 0 8.484788022 |
| ADORA2B ADORA2B   | 60.9113083  | 49.76397145 | 95.53556557   |
| 111.2449985       |             |             |               |
| CA12 CA12         | 2.342742627 | 0 0         | 16.96957604   |
| NBPF3 NBPF3       | 327.9839678 | 413.3456404 | 618.7490368   |
| 420.4683842       |             |             |               |
| GPBP1 GPBP1       | 7444.064697 | 8120.667667 | 15484.79732   |
| 11277.22604       |             |             |               |
| NDUFB10 NDUFB10   | 4862.362322 | 6593.218421 | 4023.208023   |
| 3988.793125       |             |             |               |
| NDUFB2 NDUFB2     | 5191.517661 | 6533.298537 | 4051.779407   |
| 3568.324741       |             |             |               |
| TMEM167A TMEM167A |             | 7681.853074 | 5830.50939    |
| 4130.350714       | 5668.781153 |             |               |
| LYG1 LYG1         | 23.42742627 | 15.23386881 | 70.53560449   |
| 16.02682182       |             |             |               |
| PCP2 PCP2         | 151.1068994 | 166.5569657 | 163.3926028   |
| 121.615295        |             |             |               |
| SLC16A10 SLC16A10 |             | 315.0988833 | 590.0585186   |
| 480.3563951       | 408.2125793 |             |               |
| ACBD7 ACBD7       | 43.3407386  | 50.7795627  | 38.39279738   |
| 19.79783872       |             |             |               |
| PLA2G4B PLA2G4B   | 325.6412251 | 102.5747167 | 530.3563173   |
| 375.2161814       |             |             |               |
| ARID5A ARID5A     | 15783.05708 | 19455.68165 | 14074.97809   |
| 17922.70057       |             |             |               |
| ZNF765 ZNF765     | 1423.216146 | 1163.867577 | 2021.425425   |
| 1826.114933       |             |             |               |
| ZFP92 ZFP92       | 4.685485254 | 1.015591254 | 7.142846024   |
| 2.828262674       |             |             |               |
| VMA21 VMA21       | 5237.201142 | 4220.797252 | 4332.136114   |
| 5023.937264       |             |             |               |
| CDNF CDNF         | 12.88508445 | 18.28064257 | 65.17846997   |
| 27.33987252       |             |             |               |
| HLA-H HLA-H       | 216.703693  | 53.82633646 | 294.6423985   |

|              |              |             |             |             |             |
|--------------|--------------|-------------|-------------|-------------|-------------|
| 430.8386807  |              |             |             |             |             |
| SUM03        | SUM03        | 6412.08657  | 5718.794352 | 4967.84941  |             |
| 4197.141808  |              |             |             |             |             |
| NIP7         | NIP7         | 3174.416259 | 3485.509184 | 3126.780847 |             |
| 3064.893985  |              |             |             |             |             |
| SHISA3       | SHISA3       | 16.39919839 | 26.40537261 | 11.60712479 |             |
| 13.19855915  |              |             |             |             |             |
| RBM44        | RBM44        | 10.54234182 | 12.18709505 | 0           | 14.14131337 |
| C16orf90     | C16orf90     |             | 1.171371313 | 0           | 0           |
| TMEM223      | TMEM223      | 1292.022559 | 1502.059465 | 1065.176913 |             |
| 1214.267441  |              |             |             |             |             |
| SMIM15       | SMIM15       | 4184.138332 | 4138.53436  | 3269.637768 |             |
| 4103.80914   |              |             |             |             |             |
| RELL1        | RELL1        | 1199.484225 | 789.1144044 | 526.7848943 |             |
| 757.9743967  |              |             |             |             |             |
| SLC8A1       | SLC8A1       | 73.79639275 | 13.2026863  | 15.1785478  |             |
| 25.45436407  |              |             |             |             |             |
| NUDT7        | NUDT7        | 311.5847694 | 255.928996  | 373.2137048 |             |
| 401.6132997  |              |             |             |             |             |
| NSDHL        | NSDHL        | 1352.933867 | 2231.253985 | 1370.533581 |             |
| 1326.455194  |              |             |             |             |             |
| PACRGL       | PACRGL       | 234.2742627 | 184.8376082 | 166.9640258 |             |
| 313.9371568  |              |             |             |             |             |
| DLC1         | DLC1         | 23.42742627 | 49.76397145 | 89.2855753  |             |
| 67.87830418  |              |             |             |             |             |
| FRAT1        | FRAT1        | 277.6150013 | 259.991361  | 433.927896  |             |
| 472.3198666  |              |             |             |             |             |
| LOC101927559 | LOC101927559 |             | 426.3791581 | 314.8332888 |             |
| 992.8555974  | 742.8903291  |             |             |             |             |
| WIPF2        | WIPF2        | 1458.357285 | 984.1079252 | 1026.784116 |             |
| 1004.976004  |              |             |             |             |             |
| ELL3         | ELL3         | 98.39519033 | 90.38762161 | 221.4282268 |             |
| 254.5436407  |              |             |             |             |             |
| MYH8         | MYH8         | 3.51411394  | 0           | 23.56885562 |             |
| NAPSA        | NAPSA        | 277.6150013 | 466.1563856 | 678.5703723 |             |
| 594.8779158  |              |             |             |             |             |
| TRABD2B      | TRABD2B      | 0           | 0.892855753 | 0           |             |
| YAE1D1       | YAE1D1       | 326.8125965 | 269.1316823 | 608.0347678 |             |
| 439.3234687  |              |             |             |             |             |
| NIT2         | NIT2         | 2833.547207 | 3792.217743 | 2951.78112  |             |
| 2769.811912  |              |             |             |             |             |
| LHX9         | LHX9         | 2.342742627 | 5.07795627  | 0           | 0           |
| PRKX         | PRKX         | 3557.454679 | 6418.536726 | 4450.885929 |             |
| 3168.596949  |              |             |             |             |             |
| KIF24        | KIF24        | 1397.445977 | 916.0633112 | 471.4278376 |             |
| 848.4788022  |              |             |             |             |             |
| ESPNL        | ESPNL        | 2.342742627 | 8.124730032 | 6.249990271 |             |
| 8.484788022  |              |             |             |             |             |
| RRP36        | RRP36        | 3849.126136 | 4573.207417 | 2787.495661 |             |
| 2735.87276   |              |             |             |             |             |

|             |             |             |             |             |
|-------------|-------------|-------------|-------------|-------------|
| C21orf59    | C21orf59    | 2916.714571 | 4070.489746 |             |
| 3348.209074 | 2734.930006 |             |             |             |
| CNP         | CNP         | 11109.28554 | 11092.28768 | 6808.025117 |
| 7564.659899 |             |             |             |             |
| ZNF462      | ZNF462      | 1.171371313 | 0           | 14.28569205 |
|             |             |             |             | 9.427542247 |
| ANXA2P1     | ANXA2P1     | 0           | 1.015591254 | 0           |
| CYP4F22     | CYP4F22     | 12.88508445 | 36.56128515 | 46.42849916 |
| 27.33987252 |             |             |             |             |
| LPCAT3      | LPCAT3      | 3142.789234 | 3108.724829 | 2688.388672 |
| 3218.562923 |             |             |             |             |
| FLJ42393    | FLJ42393    |             | 19.91331233 | 15.23386881 |
| 10.71426904 | 16.02682182 |             |             |             |
| FLJ37201    | FLJ37201    |             | 10.54234182 | 3.046773762 |
| 1.785711506 | 15.0840676  |             |             |             |
| ZBTB11-AS1  | ZBTB11-AS1  |             | 376.0101916 | 528.1074521 |
| 783.9273512 | 508.1445271 |             |             |             |
| TUBGCP4     | TUBGCP4     | 2559.44632  | 2919.824855 | 1421.426359 |
| 2409.679798 |             |             |             |             |
| RPPH1       | RPPH1       | 48.02622385 | 35.54569389 | 26.78567259 |
| 23.56885562 |             |             |             |             |
| SNORD12     | SNORD12     | 7.028227881 | 3.046773762 | 6.249990271 |
|             |             |             |             | 0           |
| MSX2P1      | MSX2P1      | 63.25405093 | 62.96665775 | 194.6425542 |
| 82.01961755 |             |             |             |             |
| SLC7A5P2    | SLC7A5P2    |             | 709.851016  | 551.4660509 |
| 1151.783921 | 823.0244382 |             |             |             |
| RPL23AP32   | RPL23AP32   |             | 0           | 0           |
|             |             |             |             | 3.771016899 |
| SIRPG       | SIRPG       | 7986.409615 | 15066.29625 | 5062.49212  |
| 6295.712713 |             |             |             |             |
| TEX40       | TEX40       | 1.171371313 | 2.031182508 | 4.464278765 |
| 2.828262674 |             |             |             |             |
| CABP4       | CABP4       | 3.51411394  | 9.140321286 | 33.03566286 |
| 3.771016899 |             |             |             |             |
| ZNRF2P2     | ZNRF2P2     | 4.685485254 | 0           | 0.892855753 |
|             |             |             |             | 18.85508449 |
| IL17RD      | IL17RD      | 0           | 4.062365016 | 0           |
| HYDIN       | HYDIN       | 1.171371313 | 1.015591254 | 0           |
|             |             |             |             | 0           |
| IN080       | IN080       | 1610.635556 | 790.1299957 | 1183.926729 |
| 1235.008034 |             |             |             |             |
| NUP54       | NUP54       | 3712.075692 | 3704.876895 | 3383.030448 |
| 3657.886392 |             |             |             |             |
| TBK1        | TBK1        | 5696.378697 | 5611.141679 | 4157.136386 |
| 5036.193068 |             |             |             |             |
| IMMP2L      | IMMP2L      | 144.0786716 | 129.9956805 | 435.7136075 |
| 224.3755055 |             |             |             |             |
| SIDT1       | SIDT1       | 1692.631548 | 1358.861098 | 1633.926028 |
| 2098.570904 |             |             |             |             |
| MAF         | MAF         | 784.81878   | 376.7843553 | 235.7139188 |
| 714.6077023 |             |             |             |             |
| TBL2        | TBL2        | 2446.994674 | 3151.379661 | 2236.603661 |
| 2545.436407 |             |             |             |             |
| TMEM181     | TMEM181     | 1594.236358 | 876.4552522 | 700.8917661 |

|             |             |             |             |             |             |
|-------------|-------------|-------------|-------------|-------------|-------------|
| 1201.068882 |             |             |             |             |             |
| CARD10      | CARD10      | 0           | 0           | 29.46423985 | 0           |
| CENPQ       | CENPQ       | 946.4680213 |             | 1059.261678 | 868.7486477 |
| 732.5200326 |             |             |             |             |             |
| CEP55       | CEP55       | 7770.877293 |             | 7996.765534 | 2066.068213 |
| 3350.548515 |             |             |             |             |             |
| SHQ1        | SHQ1        | 2789.035097 |             | 2858.88938  | 3066.066656 |
| 3100.718645 |             |             |             |             |             |
| TSR1        | TSR1        | 8178.514511 |             | 10146.77222 | 9141.950055 |
| 9900.804868 |             |             |             |             |             |
| PIH1D3      | PIH1D3      | 0           | 0           | 0           | 0.942754225 |
| C1orf122    | C1orf122    |             |             | 2210.377669 | 2905.606578 |
| 1711.604479 | 1710.156164 |             |             |             |             |
| RNF138P1    | RNF138P1    |             |             | 42.16936728 | 29.45214637 |
| 41.07136464 | 7.542033798 |             |             |             |             |
| AK7         | AK7         | 8.199599194 |             | 4.062365016 | 24.10710533 |
| 19.79783872 |             |             |             |             |             |
| LYPD5       | LYPD5       | 14.05645576 |             | 15.23386881 | 110.7141134 |
| 86.73338867 |             |             |             |             |             |
| MTFR1       | MTFR1       | 347.8972801 |             | 217.3365284 | 197.3211214 |
| 164.0392351 |             |             |             |             |             |
| ZNF577      | ZNF577      | 126.5081019 |             | 74.13816155 | 410.7136464 |
| 482.6901631 |             |             |             |             |             |
| VPS72       | VPS72       | 3184.958601 |             | 4254.311763 | 3138.387972 |
| 3047.924409 |             |             |             |             |             |
| OPN4        | OPN4        | 0           | 1.015591254 | 0           | 0           |
| HELZ2       | HELZ2       | 789.5042653 |             | 408.2676841 | 1236.605218 |
| 568.4807975 |             |             |             |             |             |
| C22orf34    | C22orf34    |             |             | 354.925508  | 349.3633914 |
| 291.9638312 | 185.7225823 |             |             |             |             |
| ELFN2       | ELFN2       | 1.171371313 |             | 0           | 1.785711506 |
| LOC646214   | LOC646214   |             |             | 2.342742627 | 4.062365016 |
| 17.85711506 | 10.37029647 |             |             |             |             |
| THAP7-AS1   | THAP7-AS1   |             |             | 158.1351273 | 233.5859884 |
| 451.785011  | 316.7654195 |             |             |             |             |
| LINC00324   | LINC00324   |             |             | 619.6554248 | 596.1520661 |
| 627.6775944 | 659.9279573 |             |             |             |             |
| IQCB1       | IQCB1       | 1741.829143 |             | 1796.580928 | 2511.603233 |
| 2571.833525 |             |             |             |             |             |
| TMPRSS11A   | TMPRSS11A   |             |             | 0           | 1.015591254 |
| GRK6        | GRK6        | 13721.44357 |             | 17690.58405 | 7206.238783 |
| 8172.736374 |             |             |             |             |             |
| AEBP2       | AEBP2       | 1500.526653 |             | 1007.466524 | 1270.533737 |
| 1181.271044 |             |             |             |             |             |
| MAOB        | MAOB        | 4.685485254 |             | 2.031182508 | 0           |
| RNASE6      | RNASE6      | 63.25405093 |             | 24.3741901  | 67.85703723 |
| 20.74059294 |             |             |             |             |             |
| GFRA2       | GFRA2       | 1.171371313 |             | 13.2026863  | 0           |
| OR8S1       | OR8S1       | 0           | 3.046773762 | 0           | 18.85508449 |
| AHDC1       | AHDC1       | 126.5081019 |             | 39.60805891 | 28.5713841  |

|                 |                 |             |             |             |             |
|-----------------|-----------------|-------------|-------------|-------------|-------------|
| 69.76381263     |                 |             |             |             |             |
| SNAI3           | SNAI3           | 551.7158886 | 408.2676841 | 105.3569789 |             |
| 353.5328343     |                 |             |             |             |             |
| FGF8            | FGF8            | 0           | 0           | 5.357134518 | 0           |
| THAP8           | THAP8           | 336.183567  | 472.2499331 | 508.0349235 |             |
| 325.2502075     |                 |             |             |             |             |
| GGN             | GGN             | 5.856856567 | 3.046773762 | 1.785711506 |             |
| 1.885508449     |                 |             |             |             |             |
| HLA-DPA1        | HLA-DPA1        |             | 73.79639275 | 207.1806158 |             |
| 166.9640258     | 68.8210584      |             |             |             |             |
| H3F3AP4         | H3F3AP4         | 19814.91714 | 19613.0983  | 11744.62458 |             |
| 12952.50029     |                 |             |             |             |             |
| KLKP1           | KLKP1           | 0           | 0           | 0.942754225 |             |
| AFG3L1P         | AFG3L1P         | 1124.516461 | 1089.729416 | 1463.390579 |             |
| 1491.437184     |                 |             |             |             |             |
| DUSP5P1         | DUSP5P1         | 11.71371313 | 0           | 0           | 0           |
| ERCC4           | ERCC4           | 715.7078725 | 562.6375547 | 577.6776722 |             |
| 606.1909665     |                 |             |             |             |             |
| MAN2C1          | MAN2C1          | 1841.395705 | 1788.456198 | 1305.355111 |             |
| 1881.737433     |                 |             |             |             |             |
| NPR1            | NPR1            | 0           | 0           | 16.96957604 |             |
| LOC101927273    | LOC101927273    |             | 0           | 0           | 0.942754225 |
| CPA2            | CPA2            | 5.856856567 | 4.062365016 | 0           | 0.942754225 |
| LPL             | LPL             | 4.685485254 | 11.17150379 | 0           | 0           |
| GALT            | GALT            | 2158.837331 | 3154.426435 | 3641.065761 |             |
| 2890.484453     |                 |             |             |             |             |
| RRP12           | RRP12           | 3415.71875  | 5019.051978 | 4309.81472  |             |
| 3656.943638     |                 |             |             |             |             |
| FKBP8           | FKBP8           | 7615.084909 | 4597.581607 | 3938.386727 |             |
| 3369.403599     |                 |             |             |             |             |
| PDE4A           | PDE4A           | 1530.982307 | 1402.531522 | 484.8206739 |             |
| 572.2518144     |                 |             |             |             |             |
| SPECC1L-ADORA2A | SPECC1L-ADORA2A |             | 3753.073688 | 3931.353744 |             |
| 4216.957722     | 4733.568962     |             |             |             |             |
| LINC01138       | LINC01138       |             | 45.68348122 | 46.71719769 |             |
| 230.3567843     | 169.6957604     |             |             |             |             |
| SOD2            | SOD2            | 2958.883938 | 3100.600099 | 4712.492664 |             |
| 2216.415182     |                 |             |             |             |             |
| RGAG4           | RGAG4           | 3.51411394  | 0           | 51.78563368 | 37.71016899 |
| ORM2            | ORM2            | 3.51411394  | 8.124730032 | 1.785711506 |             |
| 10.37029647     |                 |             |             |             |             |
| TGIF2-C20orf24  | TGIF2-C20orf24  |             | 9909.801312 | 14211.16842 |             |
| 9790.163332     | 8121.827646     |             |             |             |             |
| SVOPL           | SVOPL           | 2.342742627 | 7.109138778 | 8.035701777 |             |
| 4.713771124     |                 |             |             |             |             |
| SNORD97         | SNORD97         | 8.199599194 | 3.046773762 | 4.464278765 |             |
| 8.484788022     |                 |             |             |             |             |
| PTP4A2          | PTP4A2          | 34780.35704 | 31165.44881 | 20755.32483 |             |
| 26497.05024     |                 |             |             |             |             |
| CCDC155         | CCDC155         | 0           | 3.046773762 | 0           | 0           |

|              |              |             |   |             |             |
|--------------|--------------|-------------|---|-------------|-------------|
| TCEAL2       | TCEAL2       | 0           | 0 | 34.82137437 | 12.25580492 |
| TUBA3D       | TUBA3D       | 16.39919839 |   | 16.24946006 | 25.89281684 |
| 16.96957604  |              |             |   |             |             |
| DHRS13       | DHRS13       | 1171.371313 |   | 1850.407265 | 1566.068991 |
| 1613.052478  |              |             |   |             |             |
| SLFN13       | SLFN13       | 1263.909647 |   | 615.4483    | 552.6777111 |
| 1027.602105  |              |             |   |             |             |
| SFXN5        | SFXN5        | 577.4860575 |   | 562.6375547 | 509.820635  |
| 311.1088942  |              |             |   |             |             |
| ZNF579       | ZNF579       | 23.42742627 |   | 8.124730032 | 9.821413283 |
| 20.74059294  |              |             |   |             |             |
| LOC100289561 | LOC100289561 |             |   | 372.4960777 | 275.2252298 |
| 544.6420093  | 470.4343581  |             |   |             |             |
| MIR6841      | MIR6841      | 0           | 0 | 1.785711506 | 3.771016899 |
| UBE4A        | UBE4A        | 7815.389403 |   | 6001.12872  | 5874.097999 |
| 6864.19351   |              |             |   |             |             |
| TNFSF10      | TNFSF10      | 4694.856224 |   | 8248.632165 | 8416.951184 |
| 4759.966081  |              |             |   |             |             |
| SEPHS1       | SEPHS1       | 5731.519837 |   | 7002.501697 | 3601.780108 |
| 4020.846768  |              |             |   |             |             |
| RFX1         | RFX1         | 131.1935871 |   | 34.53010264 | 62.49990271 |
| 79.19135488  |              |             |   |             |             |
| ZMYM6        | ZMYM6        | 1269.766504 |   | 1509.168604 | 1808.0329   |
| 2008.066499  |              |             |   |             |             |
| SLC16A2      | SLC16A2      | 0           | 0 | 12.49998054 | 17.91233027 |
| IGFBP6       | IGFBP6       | 1.171371313 |   | 16.24946006 | 37.49994163 |
| 18.85508449  |              |             |   |             |             |
| IFNW1        | IFNW1        | 4.685485254 |   | 1.015591254 | 8.035701777 |
| 0.942754225  |              |             |   |             |             |
| TMEM159      | TMEM159      | 520.0888632 |   | 604.2767962 | 608.0347678 |
| 620.3322799  |              |             |   |             |             |
| CHMP1B       | CHMP1B       | 2513.762839 |   | 2623.272209 | 4082.136503 |
| 3469.335547  |              |             |   |             |             |
| SPATC1L      | SPATC1L      | 80.82462063 |   | 227.4924409 | 209.821102  |
| 97.10368515  |              |             |   |             |             |
| ARL8A        | ARL8A        | 849.2442023 |   | 413.3456404 | 409.8207906 |
| 454.4075363  |              |             |   |             |             |
| FAM174A      | FAM174A      | 331.4980817 |   | 418.4235967 | 287.4995525 |
| 350.7045716  |              |             |   |             |             |
| ARID2        | ARID2        | 3586.738962 |   | 2345.000206 | 2735.710027 |
| 2876.34314   |              |             |   |             |             |
| TSPAN32      | TSPAN32      | 240.1311193 |   | 359.5193039 | 133.0355072 |
| 171.5812689  |              |             |   |             |             |
| PHLDA3       | PHLDA3       | 1318.964099 |   | 3304.733941 | 1304.462255 |
| 463.8350786  |              |             |   |             |             |
| PEF1         | PEF1         | 5694.035955 |   | 7872.863401 | 6710.70384  |
| 6140.158266  |              |             |   |             |             |
| TMEM41B      | TMEM41B      | 1932.762667 |   | 1181.132628 | 1543.747597 |
| 2033.520863  |              |             |   |             |             |
| SELL         | SELL         | 66161.39453 |   | 57773.93967 | 67924.89427 |

|             |          |             |             |             |   |
|-------------|----------|-------------|-------------|-------------|---|
| 59907.31721 |          |             |             |             |   |
| NPFF        | NPFF     | 21.08468364 | 18.28064257 | 32.14280711 |   |
| 27.33987252 |          |             |             |             |   |
| RDH16       | RDH16    | 9.370970508 | 22.34300759 | 2.678567259 |   |
| 36.76741476 |          |             |             |             |   |
| LOC90246    | LOC90246 |             | 1.171371313 | 1.015591254 | 0 |
| 0           |          |             |             |             |   |
| CENPK       | CENPK    | 3475.458687 | 2148.991094 | 978.5699053 |   |
| 2305.976834 |          |             |             |             |   |
| LYRM2       | LYRM2    | 1949.161866 | 2103.289487 | 2641.067317 |   |
| 2350.286282 |          |             |             |             |   |
| MIR937      | MIR937   | 50.36896648 | 19.29623383 | 9.821413283 |   |
| 11.3130507  |          |             |             |             |   |
| C11orf54    | C11orf54 |             | 1345.905639 | 1370.032602 |   |
| 1151.783921 |          | 1301.943584 |             |             |   |
| SCML4       | SCML4    | 189.7621528 | 105.6214904 | 1868.747091 |   |
| 1755.408366 |          |             |             |             |   |
| MIR324      | MIR324   | 38.65525334 | 12.18709505 | 43.7499319  |   |
| 44.30944856 |          |             |             |             |   |
| MIR345      | MIR345   | 0           | 0           | 3.571423012 | 0 |
| MIR331      | MIR331   | 1.171371313 | 0           | 0           | 0 |
| SH3D21      | SH3D21   | 33.96976809 | 76.16934405 | 17.85711506 |   |
| 30.16813519 |          |             |             |             |   |
| UBXN2B      | UBXN2B   | 2083.869567 | 1284.722936 | 2114.282423 |   |
| 1922.275864 |          |             |             |             |   |
| EIF4A1      | EIF4A1   | 21809.76249 | 28475.14758 | 20907.11031 |   |
| 21987.85678 |          |             |             |             |   |
| PDP1        | PDP1     | 1969.075178 | 1931.654565 | 2881.245515 |   |
| 2210.758657 |          |             |             |             |   |
| GAD1        | GAD1     | 16.39919839 | 16.24946006 | 48.21421066 |   |
| 2.828262674 |          |             |             |             |   |
| ZNF592      | ZNF592   | 3002.224676 | 2486.16739  | 2012.496867 |   |
| 2120.254251 |          |             |             |             |   |
| RNASEL      | RNASEL   | 1289.679816 | 956.6869613 | 1438.390618 |   |
| 1429.215405 |          |             |             |             |   |
| DLX6        | DLX6     | 0           | 0           | 1.885508449 |   |
| MDN1        | MDN1     | 1761.742455 | 1359.876689 | 1737.497295 |   |
| 1765.778663 |          |             |             |             |   |
| AGBL4       | AGBL4    | 0           | 0           | 0.892855753 | 0 |
| BOLA1       | BOLA1    | 949.9821352 | 929.2659975 | 880.3557725 |   |
| 876.761429  |          |             |             |             |   |
| CRYL1       | CRYL1    | 746.1635267 | 974.9676039 | 816.963014  |   |
| 869.2193952 |          |             |             |             |   |
| GAL         | GAL      | 14.05645576 | 5.07795627  | 7.142846024 |   |
| 1.885508449 |          |             |             |             |   |
| HDGFRP3     | HDGFRP3  | 1538.010535 | 1459.404632 | 529.4634615 |   |
| 547.7402046 |          |             |             |             |   |
| ABHD13      | ABHD13   | 1760.571084 | 1475.654092 | 2937.495427 |   |
| 2777.353946 |          |             |             |             |   |
| RMDN3       | RMDN3    | 2389.597479 | 3295.593619 | 3061.602377 |   |

|                 |              |               |               |   |  |
|-----------------|--------------|---------------|---------------|---|--|
| 2949.877969     |              |               |               |   |  |
| PHF6 PHF6       | 4970.128483  | 3480.431228   | 2616.960212   |   |  |
| 4123.606979     |              |               |               |   |  |
| PRDX2 PRDX2     | 16046.61562  | 21837.24314   | 8774.986341   |   |  |
| 10762.48223     |              |               |               |   |  |
| LCMT2 LCMT2     | 839.8732318  | 949.5778225   | 1020.534126   |   |  |
| 1043.628927     |              |               |               |   |  |
| ADORA2A-AS1     | ADORA2A-AS1  | 365.4678498   | 413.3456404   |   |  |
| 445.5350208     | 582.6221109  |               |               |   |  |
| SLC36A3 SLC36A3 | 3.51411394   | 3.046773762   | 25.89281684   | 0 |  |
| CACNG3 CACNG3   | 0 0          | 0 3.771016899 |               |   |  |
| FAM71B FAM71B   | 1.171371313  | 11.17150379   | 20.53568232   |   |  |
| 5.656525348     |              |               |               |   |  |
| DZIP1 DZIP1     | 4.685485254  | 0 0           | 0             |   |  |
| NME1-NME2       | NME1-NME2    | 18663.45914   | 26342.40595   |   |  |
| 13514.26468     | 15804.33182  |               |               |   |  |
| SLC9A1 SLC9A1   | 1731.286801  | 1248.161651   | 799.105899    |   |  |
| 1180.328289     |              |               |               |   |  |
| CDC73 CDC73     | 5820.544057  | 5696.451344   | 5499.991439   |   |  |
| 5384.069377     |              |               |               |   |  |
| NKAP NKAP       | 1231.11125   | 1516.277742   | 1787.497218   |   |  |
| 1404.703795     |              |               |               |   |  |
| PGLS PGLS       | 1210.026567  | 1839.235761   | 1260.712323   |   |  |
| 1265.17617      |              |               |               |   |  |
| MIR1182 MIR1182 | 251.8448324  | 200.071477    | 353.5708782   |   |  |
| 369.5596561     |              |               |               |   |  |
| MIR1237 MIR1237 | 11.71371313  | 6.093547524   | 0.892855753   |   |  |
| 2.828262674     |              |               |               |   |  |
| MIR1181 MIR1181 | 571.629201   | 610.3703437   | 424.1064827   |   |  |
| 497.7742306     |              |               |               |   |  |
| LOC101929076    | LOC101929076 | 0 0           | 0 0.942754225 |   |  |
| LINC00632       | LINC00632    | 18.74194102   | 3.046773762   |   |  |
| 3.571423012     | 0            |               |               |   |  |
| TRAF4 TRAF4     | 1153.800744  | 647.9472201   | 603.570489    |   |  |
| 507.2017729     |              |               |               |   |  |
| LINC00939       | LINC00939    | 0 0           | 0 2.828262674 |   |  |
| C6orf211        | C6orf211     | 3528.170396   | 3839.950532   |   |  |
| 2377.67487      | 2414.393569  |               |               |   |  |
| MIR3188 MIR3188 | 1.171371313  | 2.031182508   | 0.892855753   | 0 |  |
| MIR3184 MIR3184 | 1.171371313  | 4.062365016   | 3.571423012   |   |  |
| 17.91233027     |              |               |               |   |  |
| MIR3183 MIR3183 | 0 0          | 0 3.771016899 |               |   |  |
| ARPC1A ARPC1A   | 3958.063668  | 4327.434334   | 3574.101579   |   |  |
| 3520.244275     |              |               |               |   |  |
| MASP2 MASP2     | 12.88508445  | 11.17150379   | 34.82137437   |   |  |
| 30.16813519     |              |               |               |   |  |
| SNORD50B        | SNORD50B     | 23.42742627   | 22.34300759   |   |  |
| 66.96418148     | 83.905126    |               |               |   |  |
| HNRNPA1P10      | HNRNPA1P10   | 27449.91536   | 33995.90164   |   |  |
| 33573.16203     | 34563.25539  |               |               |   |  |



|             |             |             |             |             |
|-------------|-------------|-------------|-------------|-------------|
| SNORD19     | SNORD19     | 17.5705697  | 9.140321286 | 16.07140355 |
| 42.42394011 |             |             |             |             |
| SNORD62B    | SNORD62B    |             | 10.54234182 | 4.062365016 |
| 6.249990271 | 5.656525348 |             |             |             |
| PP2D1       | PP2D1       | 514.2320066 | 543.3413209 | 523.2134713 |
| 600.5344411 |             |             |             |             |
| SNORD23     | SNORD23     | 24.59879758 | 25.38978135 | 21.42853807 |
| 5.656525348 |             |             |             |             |
| SNORD9      | SNORD9      | 0           | 0           | 0.942754225 |
| RAB19       | RAB19       | 159.3064986 | 562.6375547 | 395.5350986 |
| 277.1697421 |             |             |             |             |
| TLL10       | TLL10       | 4.685485254 | 8.124730032 | 0           |
| ITGB2       | ITGB2       | 29076.95011 | 25796.01785 | 0.942754225 |
| 18082.96878 |             |             |             | 9474.985251 |
| CD276       | CD276       | 181.5625536 | 302.6461937 | 119.6426709 |
| 211.1769463 |             |             |             |             |
| PRPSAP1     | PRPSAP1     | 3101.791238 | 3935.416109 | 3024.995291 |
| 2877.285894 |             |             |             |             |
| DAK         | DAK         | 2553.589463 | 2357.187301 | 1865.175668 |
| 2426.649374 |             |             |             |             |
| ZDHHC14     | ZDHHC14     | 1080.004351 | 1116.134788 | 283.0352737 |
| 518.5148236 |             |             |             |             |
| EMB         | EMB         | 6551.479756 | 7163.980706 | 8536.593855 |
| 8370.714761 |             |             |             |             |
| C1orf87     | C1orf87     | 0           | 4.464278765 | 1.885508449 |
| MY018A      | MY018A      | 4002.575778 | 2488.198572 | 1829.461438 |
| 2118.368743 |             |             |             |             |
| TLDC1       | TLDC1       | 1080.004351 | 1001.372976 | 782.1416397 |
| 988.0064275 |             |             |             |             |
| LRRC37A2    | LRRC37A2    |             | 76.13913537 | 23.35859884 |
| 40.17850889 | 117.8442781 |             |             |             |
| CTBP1       | CTBP1       | 9086.327279 | 6443.926507 | 5366.063076 |
| 5629.185476 |             |             |             |             |
| AUTS2       | AUTS2       | 469.7198967 | 44.68601518 | 67.85703723 |
| 568.4807975 |             |             |             |             |
| CSTF3-AS1   | CSTF3-AS1   |             | 46.85485254 | 38.59246765 |
| 24.10710533 | 48.08046546 |             |             |             |
| LINC00347   | LINC00347   |             | 0           | 0           |
| MIR181A1    | MIR181A1    |             | 0           | 0           |
| MKRN20S     | MKRN20S     | 0           | 4.062365016 | 0           |
| KNDC1       | KNDC1       | 3.51411394  | 8.124730032 | 0           |
| CDYL2       | CDYL2       | 1163.171714 | 793.1767694 | 0           |
| 776.8294812 |             |             |             | 443.7493093 |
| KCNIP1      | KCNIP1      | 1.171371313 | 0           | 0           |
| RPL15       | RPL15       | 31738.30574 | 36653.70395 | 34516.0177  |
| 36673.13934 |             |             |             |             |
| BAI1        | BAI1        | 4.685485254 | 0           | 31.24995136 |
| TP53TG5     | TP53TG5     | 28.11291152 | 15.23386881 | 10.37029647 |
| 22.62610139 |             |             |             | 40.17850889 |
| RPS6KA4     | RPS6KA4     | 1458.357285 | 633.7289425 | 456.2492898 |

|             |          |             |             |             |             |
|-------------|----------|-------------|-------------|-------------|-------------|
| 672.1837622 |          |             |             |             |             |
| ZNF830      | ZNF830   | 1363.476209 | 1291.832075 | 2389.281995 |             |
| 1815.744637 |          |             |             |             |             |
| ADCK2       | ADCK2    | 912.4982532 | 1206.52241  | 1429.462061 |             |
| 1242.550068 |          |             |             |             |             |
| INHBC       | INHBC    | 4.685485254 | 0           | 0           | 0           |
| HEATR5A     | HEATR5A  | 1282.651588 | 1079.573503 | 1122.319682 |             |
| 985.1781648 |          |             |             |             |             |
| FAM115D     | FAM115D  | 388.8952761 | 680.4461402 | 883.0343397 |             |
| 564.7097806 |          |             |             |             |             |
| CEP78       | CEP78    | 3244.698538 | 3283.406524 | 2108.032433 |             |
| 2114.597726 |          |             |             |             |             |
| C11orf96    | C11orf96 |             | 0           | 0           | 1.885508449 |
| PTPRQ       | PTPRQ    | 0           | 0           | 8.92855753  | 0           |
| PRICKLE3    | PRICKLE3 |             | 379.5243056 | 436.7042392 |             |
| 516.963481  |          | 356.3610969 |             |             |             |
| JADE3       | JADE3    | 73.79639275 | 81.24730032 | 18.74997081 |             |
| 27.33987252 |          |             |             |             |             |
| ZNF699      | ZNF699   | 204.9899799 | 160.4634181 | 758.9273901 |             |
| 560.9387637 |          |             |             |             |             |
| TMEM232     | TMEM232  | 7.028227881 | 11.17150379 | 18.74997081 |             |
| 9.427542247 |          |             |             |             |             |
| FBX047      | FBX047   | 0           | 5.07795627  | 0           | 2.828262674 |
| SGK223      | SGK223   | 132.3649584 | 31.48332888 | 261.6067356 |             |
| 159.325464  |          |             |             |             |             |
| WIPF3       | WIPF3    | 0           | 0           | 0.942754225 |             |
| PIWIL2      | PIWIL2   | 1.171371313 | 14.21827756 | 9.821413283 |             |
| 24.51160984 |          |             |             |             |             |
| LEUTX       | LEUTX    | 14.05645576 | 11.17150379 | 0           | 1.885508449 |
| SLC7A6      | SLC7A6   | 4323.531518 | 3065.054405 | 5806.240962 |             |
| 4384.749899 |          |             |             |             |             |
| FAM107A     | FAM107A  | 0           | 0           | 0.942754225 |             |
| UBA52       | UBA52    | 8056.691894 | 8175.509595 | 8299.094224 |             |
| 7807.890489 |          |             |             |             |             |
| HLF         | HLF      | 254.187575  | 762.7090318 | 158.0354683 |             |
| 836.2229973 |          |             |             |             |             |
| JRKL        | JRKL     | 291.6714571 | 311.786515  | 901.7843106 |             |
| 777.7722354 |          |             |             |             |             |
| EMD         | EMD      | 1862.480388 | 614.4327087 | 940.1771079 |             |
| 540.1981708 |          |             |             |             |             |
| PARK2       | PARK2    | 0           | 2.031182508 | 32.14280711 | 6.599279573 |
| PSMA3       | PSMA3    | 15344.96421 | 16897.40728 | 13632.12164 |             |
| 13741.58558 |          |             |             |             |             |
| ATF5        | ATF5     | 762.5627251 | 813.4885945 | 677.6775165 |             |
| 802.2838452 |          |             |             |             |             |
| MIP         | MIP      | 10.54234182 | 6.093547524 | 3.571423012 |             |
| 13.19855915 |          |             |             |             |             |
| PDX1        | PDX1     | 0           | 0           | 1.785711506 | 0           |
| MDH1        | MDH1     | 17381.97892 | 22447.61349 | 12207.12386 |             |
| 13636.93986 |          |             |             |             |             |

|             |             |             |             |             |             |
|-------------|-------------|-------------|-------------|-------------|-------------|
| MIR3614     | MIR3614     | 130.0222158 | 57.88870148 | 62.49990271 |             |
| 70.70656685 |             |             |             |             |             |
| NR1D1       | NR1D1       | 173.3629544 | 168.5881482 | 234.821063  |             |
| 186.6653365 |             |             |             |             |             |
| TMEM88      | TMEM88      | 7.028227881 | 5.07795627  | 3.571423012 |             |
| 2.828262674 |             |             |             |             |             |
| GALNT7      | GALNT7      | 1622.349269 | 1620.883641 | 1156.2482   |             |
| 1560.258242 |             |             |             |             |             |
| CDON        | CDON        | 11.71371313 | 21.32741634 | 9.821413283 |             |
| 16.02682182 |             |             |             |             |             |
| RFX7        | RFX7        | 1409.15969  | 827.7068721 | 722.3203042 |             |
| 836.2229973 |             |             |             |             |             |
| NUDT10      | NUDT10      | 11.71371313 | 16.24946006 | 28.5713841  |             |
| 16.96957604 |             |             |             |             |             |
| THOC5       | THOC5       | 3549.25508  | 4059.318242 | 2432.139071 |             |
| 2869.74386  |             |             |             |             |             |
| CCDC40      | CCDC40      | 1.171371313 | 3.046773762 | 32.14280711 |             |
| 13.19855915 |             |             |             |             |             |
| WDR17       | WDR17       | 17.5705697  | 23.35859884 | 17.85711506 |             |
| 1.885508449 |             |             |             |             |             |
| ZEB2-AS1    | ZEB2-AS1    |             | 9.370970508 | 1.015591254 |             |
| 5.357134518 | 10.37029647 |             |             |             |             |
| RAET1E-AS1  | RAET1E-AS1  |             | 46.85485254 | 33.51451138 |             |
| 123.2140939 | 90.50440557 |             |             |             |             |
| PTCHD1-AS   | PTCHD1-AS   |             | 0           | 0.892855753 | 0           |
| TPTE2P3     | TPTE2P3     | 0           | 4.062365016 | 0           |             |
| SBDSP1      | SBDSP1      | 994.4942451 | 1274.567024 | 3303.566286 |             |
| 1813.859128 |             |             |             |             |             |
| AURKAPS1    | AURKAPS1    |             | 44.51210991 | 32.49892013 |             |
| 67.85703723 | 63.16453306 |             |             |             |             |
| FIS1        | FIS1        | 2764.4363   | 3232.626962 | 2610.710222 |             |
| 2338.973232 |             |             |             |             |             |
| HSFY1P1     | HSFY1P1     | 0           | 0           | 0.892855753 | 0           |
| SNORA14A    | SNORA14A    |             | 0           | 0           | 2.678567259 |
| 0.942754225 |             |             |             |             |             |
| GUSBP5      | GUSBP5      | 53.88308042 | 52.81074521 | 117.8569594 |             |
| 123.5008034 |             |             |             |             |             |
| SNORA5C     | SNORA5C     | 53.88308042 | 56.87311023 | 95.53556557 |             |
| 83.905126   |             |             |             |             |             |
| SNORA5B     | SNORA5B     | 7.028227881 | 7.109138778 | 3.571423012 |             |
| 4.713771124 |             |             |             |             |             |
| LGALS8-AS1  | LGALS8-AS1  |             | 262.3871742 | 252.8822223 |             |
| 248.2138993 | 295.0820723 |             |             |             |             |
| METTL11B    | METTL11B    |             | 0           | 0           | 0.892855753 |
| FAM200B     | FAM200B     | 490.8045803 | 458.0316556 | 858.0343787 | 0           |
| 584.5076193 |             |             |             |             |             |
| ARSI        | ARSI        | 0           | 0           | 0.942754225 |             |
| FAM178A     | FAM178A     | 3710.904321 | 2998.025382 | 4175.886357 |             |
| 3785.158212 |             |             |             |             |             |
| ASB13       | ASB13       | 554.0586313 | 632.7133513 | 692.8560644 |             |

|                 |               |             |             |               |
|-----------------|---------------|-------------|-------------|---------------|
| 971.9796057     |               |             |             |               |
| LOC101927621    | LOC101927621  |             | 80.82462063 | 75.1537528    |
| 135.7140745     | 88.61889712   |             |             |               |
| IP08 IP08       | 2265.43212    |             | 1470.576136 | 1433.033484   |
| 2248.468826     |               |             |             |               |
| SPIRE1 SPIRE1   | 268.2440308   |             | 338.1918876 | 366.9637145   |
| 207.4059294     |               |             |             |               |
| KIAA0922        | KIAA0922      |             | 5452.733464 | 6008.237859   |
| 8411.594049     | 8278.324847   |             |             |               |
| KIR3DL1 KIR3DL1 | 0 0           | 0           | 3.771016899 |               |
| OR5B12 OR5B12   | 0 0           | 0           | 9.427542247 |               |
| SLC16A11        | SLC16A11      |             | 3.51411394  | 6.093547524   |
| 48.21421066     | 7.542033798   |             |             |               |
| COX6B2 COX6B2   | 3.51411394    | 0 0         |             | 1.885508449   |
| MESP1 MESP1     | 42.16936728   |             | 73.12257029 | 31.24995136   |
| 27.33987252     |               |             |             |               |
| ANGPTL3 ANGPTL3 | 0 0           | 1.785711506 |             | 0             |
| REX02 REX02     | 3776.501115   |             | 5938.162062 | 2649.103019   |
| 2627.456024     |               |             |             |               |
| APPBP2 APPBP2   | 2471.593471   |             | 1769.159965 | 1881.247072   |
| 1918.504847     |               |             |             |               |
| SLC9A3 SLC9A3   | 2.342742627   |             | 14.21827756 | 11.60712479   |
| 4.713771124     |               |             |             |               |
| SLC1A1 SLC1A1   | 56.22582305   | 140.1515931 |             | 0 34.88190631 |
| ZNF20 ZNF20     | 230.7601488   | 331.0827488 |             | 489.2849527   |
| 407.2698251     |               |             |             |               |
| DX0 DX0         | 72.62502143   |             | 3.046773762 | 6.249990271   |
| 91.4471598      |               |             |             |               |
| MIEF1 MIEF1     | 4696.027596   |             | 5204.905177 | 4933.920891   |
| 5029.593789     |               |             |             |               |
| PDE8A PDE8A     | 640.7401085   |             | 574.8246498 | 888.3914743   |
| 1217.095704     |               |             |             |               |
| RMI1 RMI1       | 2509.077353   |             | 2375.467943 | 1622.318903   |
| 2113.654972     |               |             |             |               |
| BAIAP2L2        | BAIAP2L2      |             | 5.856856567 | 3.046773762   |
| 17.85711506     | 18.85508449   |             |             |               |
| CHODL CHODL     | 30.45565415   |             | 4.062365016 | 4.464278765   |
| 45.25220279     |               |             |             |               |
| POF1B POF1B     | 2.342742627   |             | 3.046773762 | 0 20.74059294 |
| CDC42BPG        | CDC42BPG      |             | 2.342742627 | 0 0.892855753 |
|                 | 3.771016899   |             |             |               |
| C12orf76        | C12orf76      |             | 234.2742627 | 174.6816957   |
| 399.1065216     | 576.9655855   |             |             |               |
| FLJ44635        | FLJ44635      |             | 1.171371313 | 0 0.892855753 |
|                 | 1.885508449   |             |             |               |
| SLC2A7 SLC2A7   | 0 1.015591254 | 0           |             | 0             |
| PLCXD2 PLCXD2   | 201.4758659   | 205.1494333 |             | 204.4639674   |
| 83.905126       |               |             |             |               |
| AK1 AK1         | 303.3851702   |             | 148.2763231 | 274.9995719   |
| 436.495206      |               |             |             |               |

|                 |              |                 |             |   |
|-----------------|--------------|-----------------|-------------|---|
| TWIST1 TWIST1   | 3.51411394   | 9.140321286     | 8.92855753  |   |
| 5.656525348     |              |                 |             |   |
| IL1A IL1A       | 16.39919839  | 44.68601518     | 63.39275847 |   |
| 82.01961755     |              |                 |             |   |
| MRRF MRRF       | 1529.810935  | 2055.556698     | 1434.819195 |   |
| 1631.907563     |              |                 |             |   |
| COL8A2 COL8A2   | 0 0          | 6.249990271     | 0.942754225 |   |
| FGR FGR         | 5.856856567  | 15.23386881     | 177.6782949 |   |
| 13.19855915     |              |                 |             |   |
| FBXL18 FBXL18   | 564.6009731  | 389.9870416     | 325.8923499 |   |
| 354.4755885     |              |                 |             |   |
| PHC3 PHC3       | 2692.98265   | 2329.766337     | 3134.816549 |   |
| 2688.735049     |              |                 |             |   |
| CPEB4 CPEB4     | 894.9276835  | 419.4391879     | 464.2849916 |   |
| 724.9779988     |              |                 |             |   |
| ARMC2 ARMC2     | 222.5605496  | 166.5569657     | 124.9998054 |   |
| 157.4399555     |              |                 |             |   |
| DOK2 DOK2       | 9041.815169  | 16487.10842     | 4251.779096 |   |
| 4449.799941     |              |                 |             |   |
| PLK3 PLK3       | 2551.246721  | 4777.341259     | 6600.882582 |   |
| 4614.78193      |              |                 |             |   |
| BTAF1 BTAF1     | 4498.065844  | 2690.301232     | 3730.351336 |   |
| 4463.941254     |              |                 |             |   |
| METTL21B        | METTL21B     | 158.1351273     | 122.8865417 |   |
| 164.2854586     | 202.6921583  |                 |             |   |
| LOC100289230    | LOC100289230 | 48.02622385     | 27.42096386 |   |
| 143.7497762     | 110.3022443  |                 |             |   |
| KRTAP5-6        | KRTAP5-6     | 0 1.015591254 0 | 0 0         | 0 |
| MAPKAP1 MAPKAP1 | 5207.91686   | 5889.413682     | 5029.456457 |   |
| 5790.396448     |              |                 |             |   |
| MIR6853 MIR6853 | 7.028227881  | 14.21827756     | 16.07140355 |   |
| 16.02682182     |              |                 |             |   |
| MIR6852 MIR6852 | 1481.784712  | 1997.667997     | 1013.39128  |   |
| 1700.728621     |              |                 |             |   |
| MIR6840 MIR6840 | 18.74194102  | 4.062365016     | 88.39271955 |   |
| 55.62249926     |              |                 |             |   |
| MVB12B MVB12B   | 159.3064986  | 143.1983668     | 516.0706253 |   |
| 460.0640617     |              |                 |             |   |
| HIST3H2A        | HIST3H2A     | 73.79639275     | 156.4010531 |   |
| 205.3568232     | 115.9587696  |                 |             |   |
| IL33 IL33       | 0 0          | 0 1.885508449   |             |   |
| FAM69B FAM69B   | 30.45565415  | 33.51451138     | 41.96422039 |   |
| 46.19495701     |              |                 |             |   |
| DDTL DDTL       | 1515.75448   | 1875.797046     | 1399.104965 |   |
| 1066.255028     |              |                 |             |   |
| EIF2A EIF2A     | 3143.960605  | 3502.774235     | 3997.315206 |   |
| 3970.880795     |              |                 |             |   |
| USP24 USP24     | 2832.375836  | 960.7493263     | 1956.246955 |   |
| 2276.751453     |              |                 |             |   |
| FBXL2 FBXL2     | 2.342742627  | 10.15591254     | 2.678567259 |   |

|              |              |             |             |             |
|--------------|--------------|-------------|-------------|-------------|
| 12.25580492  |              |             |             |             |
| GCAT         | GCAT         | 1185.427769 | 1599.556225 | 596.427643  |
| 772.11571    |              |             |             |             |
| AMMECR1      | AMMECR1      | 1502.869395 | 1347.689594 | 950.891377  |
| 1023.831088  |              |             |             |             |
| REM2         | REM2         | 5.856856567 | 8.124730032 | 45.5356434  |
| 20.74059294  |              |             |             |             |
| PRMT9        | PRMT9        | 1069.462009 | 1351.751959 | 1550.890443 |
| 1228.408755  |              |             |             |             |
| TTLL3        | TTLL3        | 653.6251929 | 240.6951272 | 660.7132572 |
| 488.3466884  |              |             |             |             |
| ANAPC1P1     | ANAPC1P1     |             | 16.39919839 | 85.30966534 |
| 204.4639674  | 12.25580492  |             |             |             |
| GNGT2        | GNGT2        | 750.8490119 | 1051.136948 | 340.1780419 |
| 502.4880018  |              |             |             |             |
| HSBP1L1      | HSBP1L1      | 253.0162037 | 166.5569657 | 489.2849527 |
| 420.4683842  |              |             |             |             |
| FLJ32255     | FLJ32255     |             | 1083.518465 | 1147.618117 |
| 5407.13444   | 2709.475642  |             |             |             |
| ZNF30-AS1    | ZNF30-AS1    |             | 0           | 0.942754225 |
| LOC101927190 | LOC101927190 |             | 0           | 5.357134518 |
| 1.885508449  |              |             |             |             |
| UBAP2        | UBAP2        | 2976.454508 | 3098.568916 | 2330.353515 |
| 2394.595731  |              |             |             |             |
| MAT2B        | MAT2B        | 18356.55985 | 19399.82413 | 28985.66917 |
| 24761.43971  |              |             |             |             |
| SIGLEC9      | SIGLEC9      | 19.91331233 | 4.062365016 | 8.92855753  |
| 5.656525348  |              |             |             |             |
| MANF         | MANF         | 2722.266932 | 2940.13668  | 2486.603272 |
| 2342.744248  |              |             |             |             |
| MANBA        | MANBA        | 456.8348122 | 658.1031326 | 1102.676855 |
| 816.4251586  |              |             |             |             |
| NAAA         | NAAA         | 2384.911994 | 2208.910978 | 2559.817444 |
| 2456.81751   |              |             |             |             |
| SPTLC3       | SPTLC3       | 9.370970508 | 0           | 21.68334717 |
| RAB7A        | RAB7A        | 14793.24832 | 18199.39527 | 17912.47212 |
| 16353.95754  |              |             |             |             |
| FANCG        | FANCG        | 5480.846376 | 6620.639385 | 2840.17415  |
| 3293.040507  |              |             |             |             |
| ESPL1        | ESPL1        | 5574.556081 | 3348.404365 | 1510.711934 |
| 2362.542087  |              |             |             |             |
| MICU3        | MICU3        | 21.08468364 | 21.32741634 | 99.99984434 |
| 84.84788022  |              |             |             |             |
| MIOS         | MIOS         | 2108.468364 | 1997.667997 | 1760.711545 |
| 2746.243057  |              |             |             |             |
| PYGB         | PYGB         | 3946.349955 | 4586.410103 | 3794.63695  |
| 4354.581764  |              |             |             |             |
| EX01         | EX01         | 4284.876265 | 5062.722401 | 2287.496439 |
| 3041.325129  |              |             |             |             |
| FXYD2        | FXYD2        | 9.370970508 | 18.28064257 | 25.89281684 |

|             |           |             |             |             |             |
|-------------|-----------|-------------|-------------|-------------|-------------|
| 82.96237177 |           |             |             |             |             |
| ATP1B1      | ATP1B1    | 518.9174919 | 599.1988399 | 330.3566286 |             |
| 317.7081737 |           |             |             |             |             |
| ATF4        | ATF4      | 7841.159572 | 8436.516547 | 12370.51646 |             |
| 10885.04028 |           |             |             |             |             |
| MSR1        | MSR1      | 0           | 0           | 1.785711506 | 3.771016899 |
| DDT         | DDT       | 1533.325049 | 1861.578769 | 1400.890677 |             |
| 1090.766638 |           |             |             |             |             |
| AKR1C2      | AKR1C2    | 0           | 1.015591254 | 0           | 3.771016899 |
| DBP         | DBP       | 440.4356139 | 537.2477734 | 1270.533737 |             |
| 953.1245212 |           |             |             |             |             |
| LINC00950   | LINC00950 |             | 3.51411394  | 0           | 7.142846024 |
| 12.25580492 |           |             |             |             |             |
| AOX1        | AOX1      | 1.171371313 | 0           | 0           | 0           |
| USP13       | USP13     | 923.040595  | 896.7670773 | 555.3562784 |             |
| 490.2321969 |           |             |             |             |             |
| JMJD7       | JMJD7     | 694.6231889 | 662.1654976 | 1008.034145 |             |
| 939.925962  |           |             |             |             |             |
| NDUFS7      | NDUFS7    | 5743.23355  | 7739.820947 | 4208.92202  |             |
| 4018.96126  |           |             |             |             |             |
| DCAF10      | DCAF10    | 2074.498596 | 2082.977662 | 2699.995797 |             |
| 2634.055304 |           |             |             |             |             |
| NPM1        | NPM1      | 29266.71227 | 35308.04554 | 31805.30763 |             |
| 31732.16445 |           |             |             |             |             |
| ZNF257      | ZNF257    | 248.3307185 | 271.1628648 | 277.6781392 |             |
| 357.3038512 |           |             |             |             |             |
| ACTL6A      | ACTL6A    | 9257.34749  | 10501.21357 | 6355.34725  |             |
| 7020.690711 |           |             |             |             |             |
| ZBTB7A      | ZBTB7A    | 1892.936043 | 1989.543267 | 2160.710922 |             |
| 1816.687391 |           |             |             |             |             |
| UACA        | UACA      | 37.48388203 | 24.3741901  | 108.9284019 |             |
| 96.16093092 |           |             |             |             |             |
| STMN3       | STMN3     | 335.0121956 | 165.5413744 | 550.8919996 |             |
| 619.3895256 |           |             |             |             |             |
| CYP3A7      | CYP3A7    | 12.88508445 | 7.109138778 | 11.60712479 |             |
| 18.85508449 |           |             |             |             |             |
| CYP1A2      | CYP1A2    | 3.51411394  | 0           | 3.571423012 | 0           |
| ATP2A2      | ATP2A2    | 4399.670653 | 1293.863258 | 949.1056655 |             |
| 1288.745025 |           |             |             |             |             |
| ATP2B4      | ATP2B4    | 7842.330944 | 2201.801839 | 1565.176135 |             |
| 3290.212244 |           |             |             |             |             |
| PIK3CG      | PIK3CG    | 5448.047979 | 4022.756957 | 2139.282384 |             |
| 2898.026487 |           |             |             |             |             |
| KIAA2013    | KIAA2013  |             | 5908.396905 | 7619.981179 |             |
| 5125.884878 |           | 4456.39922  |             |             |             |
| CD3EAP      | CD3EAP    | 1254.538677 | 1785.409425 | 1443.747753 |             |
| 1434.87193  |           |             |             |             |             |
| DGAT1       | DGAT1     | 1509.897623 | 1510.184195 | 1549.104732 |             |
| 1582.884343 |           |             |             |             |             |
| RGS17       | RGS17     | 0           | 1.015591254 | 0           | 0.942754225 |

|                 |               |             |             |             |
|-----------------|---------------|-------------|-------------|-------------|
| PRR34-AS1       | PRR34-AS1     | 94.88107639 | 71.09138778 |             |
| 217.8568037     | 120.6725408   |             |             |             |
| COPSA4 COPSA4   | 3715.589806   | 4099.941893 | 3753.565586 |             |
| 3766.303128     |               |             |             |             |
| TRMT11 TRMT11   | 865.6434006   | 1008.482115 | 1224.105237 |             |
| 1159.587696     |               |             |             |             |
| MET MET         | 38.65525334   | 16.24946006 | 0           | 7.542033798 |
| IL3 IL3         | 16.39919839   | 77.18493531 | 1548.211876 |             |
| 69.76381263     |               |             |             |             |
| CYP7A1 CYP7A1   | 0 0           | 0.892855753 | 0           |             |
| CYP2J2 CYP2J2   | 67.93953618   | 50.7795627  | 95.53556557 |             |
| 70.70656685     |               |             |             |             |
| APBA3 APBA3     | 3623.051473   | 4063.380607 | 3251.780653 |             |
| 2964.019283     |               |             |             |             |
| MIR27B MIR27B   | 1.171371313   | 0 0         | 0           |             |
| C16orf62        | C16orf62      | 4500.408586 | 5096.236913 |             |
| 2615.174501     | 3424.083344   |             |             |             |
| ZNRF1 ZNRF1     | 3616.023245   | 1135.431022 | 660.7132572 |             |
| 2442.676196     |               |             |             |             |
| ZNF747 ZNF747   | 780.1332948   | 656.0719501 | 914.2842911 |             |
| 716.4932108     |               |             |             |             |
| CYP24A1 CYP24A1 | 4.685485254   | 1.015591254 | 0.892855753 | 0           |
| SPHKAP SPHKAP   | 0 0           | 0           | 1.885508449 |             |
| DAD1 DAD1       | 9668.498821   | 10332.62542 | 9405.342502 |             |
| 8381.085058     |               |             |             |             |
| TMEM161B-AS1    | TMEM161B-AS1  | 199.1331233 | 257.9601785 |             |
| 360.7137242     | 254.5436407   |             |             |             |
| LINC00339       | LINC00339     | 155.7923847 | 277.2564124 |             |
| 588.3919412     | 248.8871153   |             |             |             |
| RASGRF2-AS1     | RASGRF2-AS1   | 44.51210991 | 75.1537528  |             |
| 124.1069497     | 115.0160154   |             |             |             |
| XKR9 XKR9       | 62.08267961   | 24.3741901  | 71.42846024 |             |
| 169.6957604     |               |             |             |             |
| UNC119B UNC119B | 1017.921671   | 430.6106917 | 731.2488617 |             |
| 749.4896086     |               |             |             |             |
| SV2B SV2B       | 0 0           | 77.67845051 | 0           |             |
| POPDC2 POPDC2   | 105.4234182   | 88.3564391  | 125.8926612 |             |
| 153.6689386     |               |             |             |             |
| NSMCE2 NSMCE2   | 2418.881762   | 2647.646399 | 1454.462022 |             |
| 1735.610528     |               |             |             |             |
| ISLR ISLR       | 0 31.48332888 | 0           | 1.885508449 |             |
| MICU2 MICU2     | 2844.089549   | 2302.345373 | 3053.566675 |             |
| 3179.91         |               |             |             |             |
| WLS WLS         | 1.171371313   | 0 0         | 0           |             |
| PLAC4 PLAC4     | 0 2.031182508 | 0           | 0           |             |
| GDF7 GDF7       | 0 0           | 0           | 7.542033798 |             |
| COX10-AS1       | COX10-AS1     | 932.4115655 | 698.7267828 |             |
| 346.4280322     | 463.8350786   |             |             |             |
| TBC1D14 TBC1D14 | 7964.15356    | 6990.314602 | 4335.707537 |             |
| 5796.052974     |               |             |             |             |



|              |              |             |             |             |
|--------------|--------------|-------------|-------------|-------------|
| SLC6A6       | SLC6A6       | 2495.020898 | 1883.921776 | 1441.962041 |
| 1565.914767  |              |             |             |             |
| C9orf3       | C9orf3       | 265.9012882 | 319.911245  | 300.8923888 |
| 303.5668604  |              |             |             |             |
| ALS2CR11     | ALS2CR11     |             | 0           | 2.031182508 |
| 5.656525348  |              |             |             | 16.07140355 |
| NACA         | NACA         | 17987.57789 | 22123.63988 | 17149.08045 |
| 17682.29824  |              |             |             |             |
| IDE          | IDE          | 5747.919035 | 5761.449184 | 3972.315245 |
| 4147.175835  |              |             |             |             |
| CDC25C       | CDC25C       | 1185.427769 | 1223.787461 | 383.9279738 |
| 609.0192292  |              |             |             |             |
| CCR8         | CCR8         | 853.9296875 | 3484.493593 | 891.0700415 |
| 362.0176223  |              |             |             |             |
| CBL          | CBL          | 2830.033093 | 1717.364811 | 1618.74748  |
| 2449.275476  |              |             |             |             |
| MFNG         | MFNG         | 13352.4616  | 21587.4077  | 10883.01877 |
| 10341.07109  |              |             |             |             |
| SERPINE1     | SERPINE1     |             | 28.11291152 | 61.9510665  |
| 43.7499319   | 25.45436407  |             |             |             |
| NOC3L        | NOC3L        | 1901.135642 | 2048.447559 | 2199.996575 |
| 2249.41158   |              |             |             |             |
| SNRPB        | SNRPB        | 23201.35161 | 29180.9835  | 14264.26351 |
| 14867.23412  |              |             |             |             |
| IFIT1        | IFIT1        | 1181.913655 | 1747.832548 | 10823.19744 |
| 4182.057741  |              |             |             |             |
| ATP6AP2      | ATP6AP2      | 9225.720465 | 9946.700742 | 11735.69602 |
| 10880.32651  |              |             |             |             |
| TMOD1        | TMOD1        | 887.8994556 | 909.9697636 | 1198.212421 |
| 1180.328289  |              |             |             |             |
| FBXL6        | FBXL6        | 2060.44214  | 1861.578769 | 1739.283007 |
| 1977.898363  |              |             |             |             |
| LOC100506713 | LOC100506713 |             | 160.4778699 | 120.8553592 |
| 147.3211993  | 148.9551675  |             |             |             |
| TRG-AS1      | TRG-AS1      | 452.149327  | 242.7263097 | 166.9640258 |
| 247.9443611  |              |             |             |             |
| POLD4        | POLD4        | 2944.827482 | 3110.756011 | 2513.388945 |
| 2686.84954   |              |             |             |             |
| FDXACB1      | FDXACB1      | 1152.629372 | 1488.856778 | 1308.033678 |
| 1548.945191  |              |             |             |             |
| TNRC6C-AS1   | TNRC6C-AS1   |             | 491.9759517 | 158.4322356 |
| 573.2133934  | 516.6293151  |             |             |             |
| RRM2         | RRM2         | 53756.57232 | 62285.19602 | 21499.96653 |
| 27410.57908  |              |             |             |             |
| D2HGDH       | D2HGDH       | 947.6393926 | 694.6644178 | 613.3919023 |
| 642.9583813  |              |             |             |             |
| GLUD2        | GLUD2        | 18.74194102 | 26.40537261 | 10.71426904 |
| 19.79783872  |              |             |             |             |
| TXNRD3       | TXNRD3       | 94.88107639 | 72.10697904 | 117.8569594 |
| 166.8674978  |              |             |             |             |

|             |             |             |             |             |             |
|-------------|-------------|-------------|-------------|-------------|-------------|
| SNAP47      | SNAP47      | 3538.712738 | 4478.75743  | 2868.745534 |             |
| 2647.253863 |             |             |             |             |             |
| FCRL3       | FCRL3       | 113.6230174 | 615.4483    | 902.6771663 |             |
| 663.6989742 |             |             |             |             |             |
| C20orf144   | C20orf144   |             | 3.51411394  | 1.015591254 |             |
| 3.571423012 | 2.828262674 |             |             |             |             |
| OVCA2       | OVCA2       | 4131.426623 | 5760.433593 | 3161.602221 |             |
| 3130.88678  |             |             |             |             |             |
| ZNF558      | ZNF558      | 550.5445173 | 470.2187506 | 1469.640569 |             |
| 969.151343  |             |             |             |             |             |
| CAPN12      | CAPN12      | 440.4356139 | 344.2854351 | 176.7854391 |             |
| 280.940759  |             |             |             |             |             |
| ZNF420      | ZNF420      | 672.3671339 | 629.6665775 | 2091.068174 |             |
| 1335.882736 |             |             |             |             |             |
| ZNF582      | ZNF582      | 155.7923847 | 105.6214904 | 477.6778279 |             |
| 438.3807145 |             |             |             |             |             |
| TRIM67      | TRIM67      | 0           | 1.015591254 | 0           | 0           |
| TERF2       | TERF2       | 2140.09539  | 2257.659358 | 2474.996147 |             |
| 2107.055692 |             |             |             |             |             |
| TD02        | TD02        | 0           | 1.015591254 | 0           | 0           |
| MIR6843     | MIR6843     | 0           | 0           | 0           | 0.942754225 |
| MIR7848     | MIR7848     | 17.5705697  | 14.21827756 | 27.67852834 |             |
| 16.96957604 |             |             |             |             |             |
| SPINK2      | SPINK2      | 0           | 1.015591254 | 227.678217  | 45.25220279 |
| KRTAP12-4   | KRTAP12-4   | 0           | 0           | 3.571423012 | 0           |
| DNAJC14     | DNAJC14     | 4191.16656  | 5465.912129 | 5420.527277 |             |
| 4507.307948 |             |             |             |             |             |
| ACBD6       | ACBD6       | 1743.000514 | 2547.102865 | 1925.889859 |             |
| 1867.596119 |             |             |             |             |             |
| SNRNP48     | SNRNP48     | 884.3853417 | 547.4036859 | 683.0346511 |             |
| 719.3214735 |             |             |             |             |             |
| FAM81B      | FAM81B      | 1.171371313 | 0           | 0.892855753 | 0           |
| ING5        | ING5        | 1593.064986 | 1505.106239 | 1849.104265 |             |
| 1582.884343 |             |             |             |             |             |
| ACOT4       | ACOT4       | 151.1068994 | 212.2585721 | 456.2492898 |             |
| 269.6277083 |             |             |             |             |             |
| FRMD6       | FRMD6       | 186.2480388 | 271.1628648 | 286.6066967 |             |
| 131.9855915 |             |             |             |             |             |
| PRADC1      | PRADC1      | 982.780532  | 1724.473949 | 1290.176563 |             |
| 898.4447762 |             |             |             |             |             |
| NOA1        | NOA1        | 1617.663784 | 1952.981982 | 1933.032705 |             |
| 1630.022055 |             |             |             |             |             |
| POLDIP3     | POLDIP3     | 9228.063207 | 9868.500216 | 10162.48418 |             |
| 8732.732384 |             |             |             |             |             |
| FAM228B     | FAM228B     | 99.56656164 | 159.4478269 | 152.6783338 |             |
| 128.2145746 |             |             |             |             |             |
| LURAP1      | LURAP1      | 0           | 15.23386881 | 22.32139383 | 5.656525348 |
| POU4F1      | POU4F1      | 3.51411394  | 0           | 0           | 0           |
| POU2AF1     | POU2AF1     | 748.5062693 | 263.0381348 | 179.4640064 |             |
| 329.9639787 |             |             |             |             |             |

|             |             |             |             |             |             |
|-------------|-------------|-------------|-------------|-------------|-------------|
| CCNE1       | CCNE1       | 5435.162894 | 4892.103071 | 2081.24676  |             |
| 2966.847545 |             |             |             |             |             |
| S100A10     | S100A10     | 8453.786769 | 11954.52465 | 6127.669033 |             |
| 5413.294758 |             |             |             |             |             |
| LGALS7B     | LGALS7B     | 0           | 1.015591254 | 0.892855753 | 0           |
| PURG        | PURG        | 0           | 0           | 0.892855753 | 0           |
| MDC1        | MDC1        | 16.39919839 | 0           | 0           | 23.56885562 |
| SKP1        | SKP1        | 18849.70718 | 23987.24983 | 23599.07041 |             |
| 22514.85639 |             |             |             |             |             |
| SRSF6       | SRSF6       | 4129.08388  | 3770.890326 | 3654.458597 |             |
| 3141.257077 |             |             |             |             |             |
| C1orf200    | C1orf200    |             | 261.2158029 | 113.7462205 |             |
| 152.6783338 | 167.810252  |             |             |             |             |
| C22orf23    | C22orf23    |             | 17.5705697  | 30.46773762 |             |
| 24.10710533 | 27.33987252 |             |             |             |             |
| HIATL1      | HIATL1      | 7813.046661 | 9996.464714 | 7984.808999 |             |
| 6796.315206 |             |             |             |             |             |
| ZHX3        | ZHX3        | 405.2944745 | 445.8445605 | 287.4995525 |             |
| 515.6865609 |             |             |             |             |             |
| RIMKLB      | RIMKLB      | 16.39919839 | 15.23386881 | 326.7852056 |             |
| 377.1016899 |             |             |             |             |             |
| ZNF583      | ZNF583      | 342.0404235 | 372.7219902 | 877.6772052 |             |
| 625.9888052 |             |             |             |             |             |
| ZDHHC4      | ZDHHC4      | 1335.363297 | 1492.919143 | 1675.890248 |             |
| 1422.616125 |             |             |             |             |             |
| SLC22A20    | SLC22A20    |             | 7.028227881 | 1.015591254 | 0           |
|             | 7.542033798 |             |             |             |             |
| APLF        | APLF        | 406.4658458 | 628.6509863 | 466.9635588 |             |
| 473.2626208 |             |             |             |             |             |
| PHLDB2      | PHLDB2      | 363.1251072 | 366.6284427 | 142.8569205 |             |
| 125.3863119 |             |             |             |             |             |
| YIPF6       | YIPF6       | 1443.129458 | 1803.690067 | 1573.211837 |             |
| 1482.009641 |             |             |             |             |             |
| RPS8        | RPS8        | 11805.0801  | 11700.62684 | 10008.02014 |             |
| 11028.33892 |             |             |             |             |             |
| PELI2       | PELI2       | 199.1331233 | 66.01343151 | 563.3919802 |             |
| 372.3879188 |             |             |             |             |             |
| UBE2Q1      | UBE2Q1      | 2370.855538 | 798.2547257 | 799.9987547 |             |
| 874.8759205 |             |             |             |             |             |
| SERPINF1    | SERPINF1    |             | 45.68348122 | 38.59246765 |             |
| 48.21421066 | 47.13771124 |             |             |             |             |
| KATNB1      | KATNB1      | 3166.21666  | 3918.151058 | 2734.817172 |             |
| 2159.849929 |             |             |             |             |             |
| USP15       | USP15       | 8228.883477 | 9118.99387  | 9925.877406 |             |
| 9800.87292  |             |             |             |             |             |
| TMPRSS11D   | TMPRSS11D   |             | 2.342742627 | 1.015591254 | 0           |
| 0           |             |             |             |             |             |
| ARHGEF6     | ARHGEF6     | 14710.08095 | 17101.54113 | 6125.883322 |             |
| 9527.474195 |             |             |             |             |             |
| GALNT6      | GALNT6      | 291.6714571 | 638.8068988 | 254.4638896 |             |

|             |             |             |             |             |
|-------------|-------------|-------------|-------------|-------------|
| 445.9227483 |             |             |             |             |
| RPL35       | RPL35       | 11372.84408 | 13435.2567  | 11145.51837 |
| 9935.686774 |             |             |             |             |
| CPNE3       | CPNE3       | 4350.473058 | 4260.405311 | 5084.813514 |
| 5769.655855 |             |             |             |             |
| BCL2L13     | BCL2L13     | 2953.027081 | 3900.886007 | 4168.743511 |
| 3273.242668 |             |             |             |             |
| SRI         | SRI         | 10696.96283 | 11452.82257 | 6617.846841 |
| 8433.879294 |             |             |             |             |
| HIST1H2BI   | HIST1H2BI   |             | 19.91331233 | 12.18709505 |
| 9.821413283 | 5.656525348 |             |             |             |
| HIST1H2BH   | HIST1H2BH   |             | 236.6170053 | 167.5725569 |
| 111.6069691 | 197.9783872 |             |             |             |
| TET1        | TET1        | 241.3024906 | 143.1983668 | 71.42846024 |
| 169.6957604 |             |             |             |             |
| PLXNA2      | PLXNA2      | 11.71371313 | 12.18709505 | 2.678567259 |
| 1.885508449 |             |             |             |             |
| SAMM50      | SAMM50      | 4781.537702 | 6333.22706  | 3858.029709 |
| 3573.981266 |             |             |             |             |
| NUFIP2      | NUFIP2      | 2599.272945 | 1087.698233 | 2611.603078 |
| 1927.93239  |             |             |             |             |
| VAC14       | VAC14       | 2956.541195 | 4138.53436  | 4372.314623 |
| 3807.784314 |             |             |             |             |
| TREML2      | TREML2      | 753.1917546 | 1182.14822  | 1076.784038 |
| 843.7650311 |             |             |             |             |
| EHD3        | EHD3        | 554.0586313 | 240.6951272 | 286.6066967 |
| 428.010418  |             |             |             |             |
| ESPN        | ESPN        | 11.71371313 | 9.140321286 | 33.92851862 |
| 17.91233027 |             |             |             |             |
| TMEM63B     | TMEM63B     | 292.8428284 | 204.1338421 | 232.1424958 |
| 278.1124963 |             |             |             |             |
| PI4K2A      | PI4K2A      | 1864.823131 | 2781.704445 | 2234.81795  |
| 1555.544471 |             |             |             |             |
| MARCKS      | MARCKS      | 38.65525334 | 19.29623383 | 2.678567259 |
| 21.68334717 |             |             |             |             |
| LRPAP1      | LRPAP1      | 4467.61019  | 7325.459715 | 6094.63337  |
| 4596.8696   |             |             |             |             |
| HSD11B2     | HSD11B2     | 11.71371313 | 12.18709505 | 0.892855753 |
| 5.656525348 |             |             |             |             |
| IL2RG       | IL2RG       | 65296.9225  | 81112.22669 | 46112.42822 |
| 51629.93512 |             |             |             |             |
| HPS1        | HPS1        | 7263.673515 | 7475.767221 | 5240.170415 |
| 7024.461728 |             |             |             |             |
| FM04        | FM04        | 146.4214142 | 160.4634181 | 116.9641036 |
| 182.8943196 |             |             |             |             |
| XRCC6       | XRCC6       | 43023.29697 | 58632.11428 | 39132.9748  |
| 40650.61942 |             |             |             |             |
| PLRG1       | PLRG1       | 5540.586313 | 6983.205463 | 6613.382563 |
| 5568.849205 |             |             |             |             |
| PLP2        | PLP2        | 2903.829486 | 3037.633441 | 4320.528989 |

|             |             |             |             |             |             |
|-------------|-------------|-------------|-------------|-------------|-------------|
| 4233.909223 |             |             |             |             |             |
| ATP6V1B2    | ATP6V1B2    |             | 10974.57784 |             | 13471.81799 |
| 8631.236565 | 9620.806863 |             |             |             |             |
| CCDC64B     | CCDC64B     | 0           | 1.015591254 | 0.892855753 | 4.713771124 |
| ZNF674      | ZNF674      | 94.88107639 | 50.7795627  |             | 87.4998638  |
| 103.7029647 |             |             |             |             |             |
| STXBP5      | STXBP5      | 1347.07701  | 1573.150853 |             | 1627.676038 |
| 1564.029259 |             |             |             |             |             |
| DCAF12L2    | DCAF12L2    | 0           | 7.109138778 | 0           | 0           |
| TMC3        | TMC3        | 15.22782708 | 6.093547524 |             | 29.46423985 |
| 35.82466054 |             |             |             |             |             |
| TMEM64      | TMEM64      | 2663.698367 | 2543.0405   |             | 2171.425191 |
| 2334.25946  |             |             |             |             |             |
| GPR85       | GPR85       | 0           | 0           | 0.892855753 | 0           |
| EPHB2       | EPHB2       | 3.51411394  | 4.062365016 | 0           | 0           |
| ZNF207      | ZNF207      | 18358.9026  | 19954.33696 |             | 12502.65911 |
| 15154.77416 |             |             |             |             |             |
| MFSD2A      | MFSD2A      | 359.6109932 | 644.9004463 |             | 489.2849527 |
| 406.3270709 |             |             |             |             |             |
| CBFA2T3     | CBFA2T3     | 39.82662466 | 2.031182508 |             | 22.32139383 |
| 11.3130507  |             |             |             |             |             |
| DQX1        | DQX1        | 15.22782708 | 20.31182508 |             | 11.60712479 |
| 7.542033798 |             |             |             |             |             |
| AKT2        | AKT2        | 1582.522644 | 629.6665775 |             | 514.2849137 |
| 651.4431693 |             |             |             |             |             |
| EEF1E1      | EEF1E1      | 3966.263267 | 4371.104757 |             | 3124.995136 |
| 3682.398002 |             |             |             |             |             |
| RFX8        | RFX8        | 16.39919839 | 10.15591254 |             | 9.821413283 |
| 3.771016899 |             |             |             |             |             |
| GATA2       | GATA2       | 0           | 1.015591254 | 0           | 0           |
| TMOD2       | TMOD2       | 114.7943887 | 126.9489068 |             | 264.2853029 |
| 395.0140202 |             |             |             |             |             |
| FAM13B      | FAM13B      | 1669.204122 | 1201.444454 |             | 1955.354099 |
| 2109.883955 |             |             |             |             |             |
| ARL2BP      | ARL2BP      | 4123.227023 | 5863.00831  |             | 7574.988209 |
| 5583.933273 |             |             |             |             |             |
| AP3M1       | AP3M1       | 7217.990034 | 7321.39735  |             | 5669.634032 |
| 7042.374059 |             |             |             |             |             |
| FZD8        | FZD8        | 3.51411394  | 0           | 0           | 0           |
| HORMAD2     | HORMAD2     | 8.199599194 | 3.046773762 | 0           | 0           |
| LCA5L       | LCA5L       | 29.28428284 | 26.40537261 |             | 29.46423985 |
| 37.71016899 |             |             |             |             |             |
| CHD4        | CHD4        | 8297.994385 | 5440.522348 |             | 5824.098077 |
| 6145.814791 |             |             |             |             |             |
| UST         | UST         | 77.31050669 | 243.741901  |             | 438.3921747 |
| 448.751011  |             |             |             |             |             |
| PRPH        | PRPH        | 0           | 3.046773762 | 0           | 0           |
| MBD3        | MBD3        | 3739.017233 | 4231.968756 |             | 3071.42379  |
| 3210.078135 |             |             |             |             |             |
| LECT1       | LECT1       | 0           | 0           | 93.74985407 | 0           |

|             |             |             |             |             |             |
|-------------|-------------|-------------|-------------|-------------|-------------|
| UXT-AS1     | UXT-AS1     | 1147.943887 | 1426.905712 | 1298.212265 |             |
| 1202.954391 |             |             |             |             |             |
| THAP11      | THAP11      | 5011.126479 | 6501.815208 | 7250.88157  |             |
| 5533.967299 |             |             |             |             |             |
| MRPL14      | MRPL14      | 4180.624218 | 6322.055556 | 3284.816315 |             |
| 3672.027705 |             |             |             |             |             |
| LINC01461   | LINC01461   |             | 3.51411394  | 1.015591254 | 0           |
| 0           |             |             |             |             |             |
| LINC01050   | LINC01050   |             | 0           | 1.015591254 | 0           |
| PRPF40B     | PRPF40B     | 507.2037787 | 453.9692906 | 641.9632864 | 0           |
| 615.6185087 |             |             |             |             |             |
| ORMDL2      | ORMDL2      | 3717.932549 | 4096.895119 | 2903.566909 |             |
| 3283.612965 |             |             |             |             |             |
| TAPT1-AS1   | TAPT1-AS1   |             | 26.94154021 | 23.35859884 |             |
| 74.99988325 | 58.45076193 |             |             |             |             |
| RNF122      | RNF122      | 25.7701689  | 9.140321286 | 6.249990271 |             |
| 18.85508449 |             |             |             |             |             |
| MLLT4-AS1   | MLLT4-AS1   |             | 7.028227881 | 1.015591254 |             |
| 4.464278765 | 0           |             |             |             |             |
| CDH2        | CDH2        | 31.62702546 | 0           | 96.16093092 |             |
| CD47        | CD47        | 11911.67489 | 9742.5669   | 9738.377698 |             |
| 12598.96746 |             |             |             |             |             |
| SGPL1       | SGPL1       | 2787.863726 | 1547.761071 | 1991.961185 |             |
| 2136.281073 |             |             |             |             |             |
| WBP4        | WBP4        | 955.8389918 | 1030.825123 | 979.4627611 |             |
| 998.376724  |             |             |             |             |             |
| CEP250      | CEP250      | 4930.301858 | 4687.969229 | 3015.173878 |             |
| 3455.194234 |             |             |             |             |             |
| DAB2        | DAB2        | 1.171371313 | 0           | 23.21424958 | 0           |
| ANXA5       | ANXA5       | 20262.38098 | 21066.40938 | 9691.949199 |             |
| 10933.12074 |             |             |             |             |             |
| RHCG        | RHCG        | 0           | 0           | 8.484788022 |             |
| FAM200A     | FAM200A     | 481.4336098 | 398.1117716 | 1033.926962 |             |
| 780.6004981 |             |             |             |             |             |
| FAM72A      | FAM72A      | 652.4538216 | 894.7358948 | 195.5354099 |             |
| 507.2017729 |             |             |             |             |             |
| DPH3        | DPH3        | 2728.123789 | 2562.336734 | 3125.887991 |             |
| 2684.021278 |             |             |             |             |             |
| EDC3        | EDC3        | 3907.694702 | 5059.675628 | 3540.173061 |             |
| 3282.67021  |             |             |             |             |             |
| SEMA4D      | SEMA4D      | 11432.58402 | 7682.947837 | 10399.09096 |             |
| 12083.2809  |             |             |             |             |             |
| LINC00999   | LINC00999   |             | 101.9093043 | 60.93547524 |             |
| 105.3569789 | 129.1573288 |             |             |             |             |
| ZNF252P     | ZNF252P     | 247.1593471 | 201.0870683 | 766.9630919 |             |
| 779.6577438 |             |             |             |             |             |
| CEP83-AS1   | CEP83-AS1   |             | 42.16936728 | 58.90429273 |             |
| 56.24991244 | 19.79783872 |             |             |             |             |
| C6orf164    | C6orf164    |             | 0           | 10.15591254 | 14.28569205 |
| 0           |             |             |             |             |             |

|                 |             |               |               |
|-----------------|-------------|---------------|---------------|
| HNRNPU-AS1      | HNRNPU-AS1  | 2613.3294     | 2512.572763   |
| 2208.925133     | 2447.389967 |               |               |
| ZNF252P-AS1     | ZNF252P-AS1 | 22.25605496   | 20.31182508   |
| 135.7140745     | 92.38991402 |               |               |
| DYRK4 DYRK4     | 631.369138  | 769.8181706   | 458.9278571   |
| 575.0800771     |             |               |               |
| LOC339807       | LOC339807   | 0 0           | 33.92851862   |
| 5.656525348     |             |               |               |
| LOC440704       | LOC440704   | 0 0           | 0 1.885508449 |
| PROC PROC       | 0 0         | 15.1785478    | 15.0840676    |
| AKAP12 AKAP12   | 35.1411394  | 22.34300759   | 42.85707615   |
| 35.82466054     |             |               |               |
| LRBA LRBA       | 7264.844886 | 2078.915297   | 1884.818495   |
| 2808.464835     |             |               |               |
| WBSCR27 WBSCR27 | 74.96776406 | 4.062365016   | 15.1785478    |
| 75.42033798     |             |               |               |
| PROZ PROZ       | 24.59879758 | 11.17150379   | 11.60712479   |
| 8.484788022     |             |               |               |
| NKX2-4 NKX2-4   | 3.51411394  | 0 1.785711506 | 0             |
| CCND1 CCND1     | 24.59879758 | 16.24946006   | 103.5712674   |
| 62.22177883     |             |               |               |
| THEM4 THEM4     | 1669.204122 | 2617.178662   | 2983.923927   |
| 2261.667385     |             |               |               |
| NEXN NEXN       | 16.39919839 | 9.140321286   | 300.8923888   |
| 128.2145746     |             |               |               |
| FAM64A FAM64A   | 718.0506152 | 1113.088014   | 333.9280516   |
| 532.656137      |             |               |               |
| SLC7A1 SLC7A1   | 3775.329743 | 1919.46747    | 1964.282657   |
| 2534.123356     |             |               |               |
| LRP4 LRP4       | 2.342742627 | 5.07795627    | 24.10710533   |
| 4.713771124     |             |               |               |
| RAB3B RAB3B     | 8.199599194 | 2.031182508   | 1.785711506   |
| 34.88190631     |             |               |               |
| ADM ADM         | 0 0         | 25.89281684   | 2.828262674   |
| RPS17 RPS17     | 3.51411394  | 5.07795627    | 7.142846024   |
| 3.771016899     |             |               |               |
| PZP PZP         | 2.342742627 | 1.015591254   | 0 0.942754225 |
| LRRC24 LRRC24   | 685.2522184 | 639.8224901   | 1112.498268   |
| 1072.854308     |             |               |               |
| RPL6 RPL6       | 7185.191637 | 8489.327293   | 7069.631852   |
| 7558.06062      |             |               |               |
| CLPB CLPB       | 1595.407729 | 2030.166917   | 1229.462372   |
| 1093.594901     |             |               |               |
| ZNF320 ZNF320   | 130.0222158 | 108.6682642   | 561.6062687   |
| 477.9763919     |             |               |               |
| NIPAL1 NIPAL1   | 10.54234182 | 12.18709505   | 42.85707615   |
| 16.96957604     |             |               |               |
| PPIG PPIG       | 3167.388032 | 2964.510871   | 3736.601326   |
| 3845.494483     |             |               |               |
| RPL19 RPL19     | 17945.40852 | 23400.23808   | 25428.53185   |

|                 |              |               |               |   |  |
|-----------------|--------------|---------------|---------------|---|--|
| 23226.63583     |              |               |               |   |  |
| COL15A1 COL15A1 | 14.05645576  | 6.093547524   | 32.14280711   | 0 |  |
| IFT81 IFT81     | 94.88107639  | 120.8553592   | 153.5711895   |   |  |
| 169.6957604     |              |               |               |   |  |
| SYNC SYNC       | 6771.697563  | 6327.133513   | 5606.241273   |   |  |
| 6581.367243     |              |               |               |   |  |
| CRYZ CRYZ       | 1661.004522  | 4901.243392   | 3050.888108   |   |  |
| 1391.505236     |              |               |               |   |  |
| UBE2A UBE2A     | 7193.391236  | 7631.152683   | 4683.92128    |   |  |
| 5236.056964     |              |               |               |   |  |
| MIR580 MIR580   | 0 0          | 2.678567259   | 2.828262674   |   |  |
| ANKRD2 ANKRD2   | 9.370970508  | 28.43655511   | 0 9.427542247 |   |  |
| LINC00896       | LINC00896    | 8.199599194   | 1.015591254   |   |  |
| 26.78567259     | 10.37029647  |               |               |   |  |
| FRMPD3 FRMPD3   | 0 0          | 1.785711506   | 0             |   |  |
| MIRLET7A3       | MIRLET7A3    | 2.342742627   | 0 3.571423012 |   |  |
| 1.885508449     |              |               |               |   |  |
| ZNF451 ZNF451   | 4535.549726  | 3285.437707   | 4014.279466   |   |  |
| 4232.023715     |              |               |               |   |  |
| RD3L RD3L       | 1.171371313  | 0 2.678567259 | 0             |   |  |
| SHANK3 SHANK3   | 2.342742627  | 0 0           | 0             |   |  |
| GTSCR1 GTSCR1   | 0 0          | 41.07136464   | 6.599279573   |   |  |
| BOLA3-AS1       | BOLA3-AS1    | 62.08267961   | 99.5279429    |   |  |
| 189.2854196     | 115.9587696  |               |               |   |  |
| PJA2 PJA2       | 8376.476263  | 7057.343624   | 9222.307073   |   |  |
| 9928.14474      |              |               |               |   |  |
| SRRM1 SRRM1     | 7653.740162  | 8848.846597   | 8697.30789    |   |  |
| 8669.56785      |              |               |               |   |  |
| ZBTB32 ZBTB32   | 3553.940565  | 7003.517288   | 1339.28363    |   |  |
| 1413.188583     |              |               |               |   |  |
| IRX5 IRX5       | 3.51411394   | 0 1.785711506 | 0             |   |  |
| MMADHC MMADHC   | 9823.119835  | 10423.01304   | 6627.668255   |   |  |
| 7032.946516     |              |               |               |   |  |
| SNTB1 SNTB1     | 735.6211849  | 819.582142    | 2067.853924   |   |  |
| 1795.946798     |              |               |               |   |  |
| IFT52 IFT52     | 1071.804752  | 1189.257358   | 1392.854975   |   |  |
| 843.7650311     |              |               |               |   |  |
| STK36 STK36     | 1020.264414  | 839.8939671   | 1119.641114   |   |  |
| 916.3571064     |              |               |               |   |  |
| HMX2 HMX2       | 2.342742627  | 6.093547524   | 4.464278765   |   |  |
| 4.713771124     |              |               |               |   |  |
| LOC101928043    | LOC101928043 | 10.54234182   | 9.140321286   |   |  |
| 10.71426904     | 9.427542247  |               |               |   |  |
| CCSER2 CCSER2   | 2883.916174  | 4066.427381   | 7971.416163   |   |  |
| 6607.764361     |              |               |               |   |  |
| BCORP1 BCORP1   | 142.9073002  | 0 0           | 160.2682182   |   |  |
| DDR2 DDR2       | 4.685485254  | 1.015591254   | 0 8.484788022 |   |  |
| FAM166A FAM166A | 4300.104092  | 6096.594298   | 2565.174578   |   |  |
| 3250.616567     |              |               |               |   |  |
| C5orf58 C5orf58 | 7.028227881  | 3.046773762   | 7.142846024   |   |  |



|             |          |             |   |             |             |
|-------------|----------|-------------|---|-------------|-------------|
| 17.91233027 |          |             |   |             |             |
| FAM25G      | FAM25G   | 0           | 0 | 1.785711506 | 0           |
| ABHD12      | ABHD12   | 2826.518979 |   | 3455.041446 | 1949.996965 |
| 2360.656579 |          |             |   |             |             |
| FOSB        | FOSB     | 29.28428284 |   | 34.53010264 | 54.46420093 |
| 35.82466054 |          |             |   |             |             |
| GABRA2      | GABRA2   | 0           | 0 | 0.892855753 | 0           |
| WASF3       | WASF3    | 4.685485254 |   | 0           | 0           |
| MESDC2      | MESDC2   | 5186.832176 |   | 6790.243125 | 4154.457819 |
| 4236.737486 |          |             |   |             |             |
| KIAA1045    | KIAA1045 |             |   | 3.51411394  | 11.17150379 |
|             |          |             |   |             | 0           |
| 36.76741476 |          |             |   |             |             |
| OTC         | OTC      | 1.171371313 |   | 2.031182508 | 2.678567259 |
| 3.771016899 |          |             |   |             |             |
| G3BP2       | G3BP2    | 17731.04757 |   | 19063.66343 | 16683.00975 |
| 16773.48317 |          |             |   |             |             |
| OSBPL11     | OSBPL11  | 1683.260577 |   | 1402.531522 | 1158.033912 |
| 1016.289054 |          |             |   |             |             |
| TRIM73      | TRIM73   | 15.22782708 |   | 11.17150379 | 34.82137437 |
| 25.45436407 |          |             |   |             |             |
| LRP1B       | LRP1B    | 0           | 0 | 0.892855753 | 13.19855915 |
| SLC39A5     | SLC39A5  | 15.22782708 |   | 5.07795627  | 0.892855753 |
| 10.37029647 |          |             |   |             |             |
| LAPTM5      | LAPTM5   | 32889.76374 |   | 29431.83454 | 16506.22431 |
| 21328.87158 |          |             |   |             |             |
| CMYA5       | CMYA5    | 9.370970508 |   | 5.07795627  | 0           |
| TSPAN17     | TSPAN17  | 3877.239048 |   | 3827.763437 | 23.56885562 |
| 3721.993679 |          |             |   |             |             |
| ASB15       | ASB15    | 0           | 0 | 0.892855753 | 0           |
| SLC16A14    | SLC16A14 |             |   | 146.4214142 | 72.10697904 |
| 17.85711506 |          |             |   |             |             |
| KIAA0232    | KIAA0232 | 86.73338867 |   | 1910.506612 | 1841.266944 |
| 1843.74713  |          |             |   |             |             |
| TIMM17B     | TIMM17B  | 3175.587631 |   | 3639.879055 | 3157.137943 |
| 3001.729451 |          |             |   |             |             |
| FRMD4A      | FRMD4A   | 21.08468364 |   | 27.42096386 | 34.82137437 |
| 39.59567744 |          |             |   |             |             |
| ATG4A       | ATG4A    | 1173.714056 |   | 1481.74764  | 1414.283513 |
| 1548.002437 |          |             |   |             |             |
| MRPS33      | MRPS33   | 2502.049126 |   | 3052.86731  | 2374.996303 |
| 2116.483234 |          |             |   |             |             |
| TSGA13      | TSGA13   | 10.54234182 |   | 10.15591254 | 3.571423012 |
| 6.599279573 |          |             |   |             |             |
| BMI1        | BMI1     | 4100.970968 |   | 3372.778555 | 5024.992178 |
| 4933.432858 |          |             |   |             |             |
| ATP5G2      | ATP5G2   | 10372.49298 |   | 8280.115494 | 6441.954258 |
| 8107.686333 |          |             |   |             |             |
| ATP5C1      | ATP5C1   | 13707.38711 |   | 17262.00455 | 9320.521206 |
| 10951.03307 |          |             |   |             |             |
| FAM229A     | FAM229A  | 3.51411394  |   | 0           | 8.92855753  |
| 5.656525348 |          |             |   |             |             |

|             |             |             |             |               |
|-------------|-------------|-------------|-------------|---------------|
| COX7B       | COX7B       | 9136.696245 | 8668.071353 | 6526.775555   |
| 6680.356436 |             |             |             |               |
| COX6B1      | COX6B1      | 8547.496474 | 8143.010675 | 5475.884333   |
| 5441.577385 |             |             |             |               |
| CSNK1A1     | CSNK1A1     | 11424.38442 | 12139.36226 | 11582.12483   |
| 11649.61395 |             |             |             |               |
| ARMC12      | ARMC12      | 11.71371313 | 5.07795627  | 8.92855753    |
| 9.427542247 |             |             |             |               |
| PRRT3       | PRRT3       | 626.6836527 | 1109.025649 | 841.0701194   |
| 675.9547791 |             |             |             |               |
| SIPA1       | SIPA1       | 11062.43068 | 12308.966   | 4774.099711   |
| 7916.307225 |             |             |             |               |
| IVNS1ABP    | IVNS1ABP    |             | 11521.60824 | 16159.07244   |
| 19278.54142 | 14927.57039 |             |             |               |
| WIPI1       | WIPI1       | 1307.250386 | 1432.999259 | 917.8557141   |
| 1096.423163 |             |             |             |               |
| C9orf89     | C9orf89     | 1663.347265 | 2346.015797 | 1678.568816   |
| 1555.544471 |             |             |             |               |
| NFIA        | NFIA        | 25.7701689  | 21.32741634 | 113.3926806   |
| 115.0160154 |             |             |             |               |
| ABCA3       | ABCA3       | 189.7621528 | 230.5392147 | 151.785478    |
| 246.0588527 |             |             |             |               |
| ENDOV       | ENDOV       | 434.5787573 | 519.9827221 | 503.5706447   |
| 411.9835962 |             |             |             |               |
| IFITM3      | IFITM3      | 10.54234182 | 733.2568854 | 5025.885034   |
| 79.19135488 |             |             |             |               |
| MAGEE1      | MAGEE1      | 148.7641568 | 39.60805891 | 135.7140745   |
| 165.9247436 |             |             |             |               |
| ABHD17B     | ABHD17B     | 2670.726595 | 2760.377029 | 1780.354372   |
| 1800.660569 |             |             |             |               |
| MAP3K10     | MAP3K10     | 87.85284851 | 14.21827756 | 43.7499319    |
| 32.05364364 |             |             |             |               |
| BSG         | BSG         | 18766.53981 | 22591.82745 | 14498.19172   |
| 14843.66527 |             |             |             |               |
| CALHM3      | CALHM3      | 1.171371313 | 15.23386881 | 0 5.656525348 |
| CBLB        | CBLB        | 6655.731803 | 3612.458091 | 4680.349857   |
| 6341.90767  |             |             |             |               |
| KMT2E-AS1   | KMT2E-AS1   |             | 360.7823645 | 253.8978135   |
| 464.2849916 | 352.59008   |             |             |               |
| TAOK3       | TAOK3       | 4180.624218 | 5079.987453 | 3795.529806   |
| 3988.793125 |             |             |             |               |
| MMS19       | MMS19       | 4803.793757 | 4613.831067 | 5493.741448   |
| 5767.770347 |             |             |             |               |
| POLRMT      | POLRMT      | 4455.896476 | 5937.146471 | 5132.134868   |
| 4422.460068 |             |             |             |               |
| LPA         | LPA         | 0           | 2.031182508 | 3.571423012 0 |
| ARL6IP1     | ARL6IP1     | 36601.83943 | 36349.02657 | 19245.50576   |
| 26219.8805  |             |             |             |               |
| BAGE5       | BAGE5       | 0           | 0           | 0.942754225   |
| EED         | EED         | 6832.608871 | 6658.216262 | 6619.632553   |

|              |              |             |             |             |   |
|--------------|--------------|-------------|-------------|-------------|---|
| 7417.59024   |              |             |             |             |   |
| CHRND        | CHRND        | 2.342742627 | 1.015591254 | 7.142846024 | 0 |
| MAMDC4       | MAMDC4       | 78.481878   | 27.42096386 | 64.28561422 |   |
| 48.08046546  |              |             |             |             |   |
| HDHD3        | HDHD3        | 872.6716285 | 1163.867577 | 1662.497412 |   |
| 1240.66456   |              |             |             |             |   |
| LOC101927814 | LOC101927814 |             | 5.856856567 | 8.124730032 |   |
| 8.035701777  | 0            |             |             |             |   |
| ANKRD20A1    | ANKRD20A1    |             | 2.342742627 | 1.015591254 | 0 |
|              | 2.828262674  |             |             |             |   |
| EMC7         | EMC7         | 5538.24357  | 7204.604356 | 4376.778901 |   |
| 3744.619781  |              |             |             |             |   |
| ZNF713       | ZNF713       | 66.76816487 | 51.79515396 | 119.6426709 |   |
| 98.04643937  |              |             |             |             |   |
| PHF1         | PHF1         | 59.73993699 | 66.01343151 | 647.3204209 |   |
| 400.6705455  |              |             |             |             |   |
| SNRNP25      | SNRNP25      | 5158.719264 | 4769.216529 | 1610.711778 |   |
| 3102.604154  |              |             |             |             |   |
| SH3BGRL3     | SH3BGRL3     |             | 62239.64337 | 66476.54113 |   |
| 30499.05967  | 41275.66547  |             |             |             |   |
| EIF2B3       | EIF2B3       | 2338.057142 | 3544.413477 | 2077.675337 |   |
| 2441.733442  |              |             |             |             |   |
| C8orf44      | C8orf44      | 112.4516461 | 147.2607318 | 247.3210436 |   |
| 188.5508449  |              |             |             |             |   |
| HSPA2        | HSPA2        | 372.4960777 | 485.4526194 | 448.213588  |   |
| 345.9908005  |              |             |             |             |   |
| AK5          | AK5          | 14.05645576 | 16.24946006 | 314.2852251 |   |
| 279.0552505  |              |             |             |             |   |
| HSH2D        | HSH2D        | 4372.729113 | 4636.174075 | 3017.852445 |   |
| 2446.447213  |              |             |             |             |   |
| ZNF335       | ZNF335       | 3596.109932 | 2565.383508 | 2880.352659 |   |
| 2413.450815  |              |             |             |             |   |
| LOC101927478 | LOC101927478 |             | 1.171371313 | 4.062365016 |   |
| 2.678567259  | 7.542033798  |             |             |             |   |
| LOC102724058 | LOC102724058 |             | 2.342742627 | 4.062365016 |   |
| 16.07140355  | 1.885508449  |             |             |             |   |
| HNRNPA1L2    | HNRNPA1L2    |             | 578.6574288 | 611.3859349 |   |
| 1460.712012  | 960.666555   |             |             |             |   |
| ANXA2R       | ANXA2R       | 299.8710562 | 340.2230701 | 1024.998404 |   |
| 567.5380433  |              |             |             |             |   |
| ZNF544       | ZNF544       | 1555.581104 | 1636.11751  | 1627.676038 |   |
| 1459.38354   |              |             |             |             |   |
| CSTF2T       | CSTF2T       | 2767.950414 | 1716.349219 | 2195.532297 |   |
| 2402.137765  |              |             |             |             |   |
| TINAG        | TINAG        | 0           | 0           | 8.035701777 | 0 |
| XKR8         | XKR8         | 927.7260803 | 1397.453566 | 1095.534009 |   |
| 901.2730388  |              |             |             |             |   |
| RPL10        | RPL10        | 19059.38264 | 24225.91377 | 26053.53087 |   |
| 24090.1987   |              |             |             |             |   |
| ACTR5        | ACTR5        | 1110.460005 | 1496.981508 | 1781.247227 |   |

|                           |             |             |             |  |  |   |
|---------------------------|-------------|-------------|-------------|--|--|---|
| 1351.909558               |             |             |             |  |  |   |
| ITGA1 ITGA1               | 630.1977666 | 870.3617047 | 598.2133545 |  |  |   |
| 702.3518974               |             |             |             |  |  |   |
| LZTS1 LZTS1               | 285.8146005 | 216.3209371 | 171.4283046 |  |  |   |
| 194.2073703               |             |             |             |  |  |   |
| FAM92A1 FAM92A1           | 64.42542224 | 99.5279429  | 80.35701777 |  |  |   |
| 60.33627038               |             |             |             |  |  |   |
| SHE SHE                   | 1.171371313 | 1.015591254 | 4.464278765 |  |  | 0 |
| SERPINH1 SERPINH1         | 609.0192292 | 381.8670482 | 471.2343419 |  |  |   |
| 741.9631308               |             |             |             |  |  |   |
| LCMT1 LCMT1               | 1965.561064 | 2706.550692 | 2068.74678  |  |  |   |
| 2114.597726               |             |             |             |  |  |   |
| MAMDC2-AS1 MAMDC2-AS1     |             | 0 0         | 1.785711506 |  |  | 0 |
| LOC100505622 LOC100505622 |             | 83.16736326 | 99.5279429  |  |  |   |
| 96.42842133               | 70.70656685 |             |             |  |  |   |
| LOC339666 LOC339666       |             | 4.685485254 | 2.031182508 |  |  |   |
| 2.678567259               | 22.62610139 |             |             |  |  |   |
| SH2D3A SH2D3A             | 671.1957626 | 1018.638028 | 1403.569244 |  |  |   |
| 1204.839899               |             |             |             |  |  |   |
| TOM1L1 TOM1L1             | 163.9919839 | 172.6505132 | 157.1426125 |  |  |   |
| 181.9515654               |             |             |             |  |  |   |
| DIAPH1 DIAPH1             | 20276.43744 | 11083.14736 | 6895.524981 |  |  |   |
| 9757.506226               |             |             |             |  |  |   |
| MFSD9 MFSD9               | 912.4982532 | 1002.388568 | 919.6414256 |  |  |   |
| 914.471598                |             |             |             |  |  |   |
| NSMCE1 NSMCE1             | 4410.212995 | 4933.742312 | 4667.849877 |  |  |   |
| 4391.349179               |             |             |             |  |  |   |
| CCDC138 CCDC138           | 1133.887431 | 832.7848283 | 454.4635783 |  |  |   |
| 774.9439727               |             |             |             |  |  |   |
| NBPF1 NBPF1               | 51.54033779 | 78.20052656 | 589.284797  |  |  |   |
| 478.9191462               |             |             |             |  |  |   |
| KCNS2 KCNS2               | 1.171371313 | 0 0         | 0           |  |  |   |
| SCAF4 SCAF4               | 6781.068534 | 7443.268301 | 6876.77501  |  |  |   |
| 7130.050202               |             |             |             |  |  |   |
| SNX13 SNX13               | 1880.050958 | 1580.259991 | 1867.854235 |  |  |   |
| 2053.318701               |             |             |             |  |  |   |
| CERS6 CERS6               | 6065.360661 | 3802.373655 | 3489.280283 |  |  |   |
| 3329.807922               |             |             |             |  |  |   |
| RGP1 RGP1                 | 777.7905521 | 662.1654976 | 582.141951  |  |  |   |
| 654.271432                |             |             |             |  |  |   |
| PAFAH1B3 PAFAH1B3         |             | 1636.405725 | 2192.661517 |  |  |   |
| 1465.176291               | 1602.682182 |             |             |  |  |   |
| CAAP1 CAAP1               | 1676.23235  | 1314.175083 | 1359.819312 |  |  |   |
| 1436.757438               |             |             |             |  |  |   |
| SLC25A29 SLC25A29         |             | 282.3004865 | 378.8155378 |  |  |   |
| 243.7496206               | 164.0392351 |             |             |  |  |   |
| KCNIP2-AS1 KCNIP2-AS1     |             | 14.05645576 | 12.18709505 |  |  |   |
| 28.5713841                | 10.37029647 |             |             |  |  |   |
| LINC00536 LINC00536       |             | 2.342742627 | 0 0         |  |  | 0 |
| LINC00260 LINC00260       |             | 32.79839678 | 18.28064257 |  |  |   |

|                 |                 |             |             |
|-----------------|-----------------|-------------|-------------|
| 28.5713841      | 30.16813519     |             |             |
| SLC25A46        | SLC25A46        | 6651.046318 | 6751.650657 |
| 2724.102902     | 3841.723466     |             |             |
| HSF2BP HSF2BP   | 24.59879758     | 18.28064257 | 82.14272928 |
| 29.22538097     |                 |             |             |
| CCDC47 CCDC47   | 8321.421811     | 8394.877306 | 5982.133545 |
| 6784.059401     |                 |             |             |
| RAB25 RAB25     | 0 0             | 15.1785478  | 30.16813519 |
| TXNDC16 TXNDC16 | 1068.290638     | 822.6289158 | 580.3562395 |
| 630.7025763     |                 |             |             |
| GCNT3 GCNT3     | 0 2.031182508 0 | 0           | 0           |
| RNVU1-20        | RNVU1-20        | 90.19559114 | 42.65483267 |
| 9.821413283     | 40.53843166     |             |             |
| MORC1 MORC1     | 0 0             | 0.892855753 | 2.828262674 |
| C6orf201        | C6orf201        | 1292.022559 | 1890.015324 |
| 2523.210358     | 2226.785479     |             |             |
| ZNF154 ZNF154   | 158.1351273     | 43.67042392 | 183.9282851 |
| 263.9711829     |                 |             |             |
| GJA3 GJA3       | 22.25605496     | 16.24946006 | 9.821413283 |
| 12.25580492     |                 |             |             |
| SLC18B1 SLC18B1 | 590.371142      | 528.1074521 | 1024.998404 |
| 930.4984198     |                 |             |             |
| ZNF813 ZNF813   | 412.3227023     | 293.5058724 | 616.9633253 |
| 860.7346072     |                 |             |             |
| IFNGR2 IFNGR2   | 156.963756      | 259.991361  | 2328.567804 |
| 1792.175781     |                 |             |             |
| CXorf40B        | CXorf40B        | 1774.62754  | 3252.938787 |
| 2447.317619     | 1923.218618     |             |             |
| EVX2 EVX2       | 0 1.015591254 0 | 0           | 0           |
| ZNF799 ZNF799   | 336.183567      | 362.5660777 | 622.3204599 |
| 577.9083398     |                 |             |             |
| SMG9 SMG9       | 1580.179902     | 1126.290701 | 867.8557919 |
| 963.4948177     |                 |             |             |
| OGFOD2 OGFOD2   | 1390.417749     | 1609.712138 | 1405.354955 |
| 1424.501634     |                 |             |             |
| FASTKD1 FASTKD1 | 2134.238533     | 2169.302919 | 1188.391007 |
| 1278.374729     |                 |             |             |
| PDPK1 PDPK1     | 2914.371828     | 2502.41685  | 3165.173644 |
| 3253.444829     |                 |             |             |
| GCFC2 GCFC2     | 1225.254394     | 1221.756279 | 1321.426514 |
| 1490.494429     |                 |             |             |
| ZNF768 ZNF768   | 79.65324932     | 72.10697904 | 248.2138993 |
| 172.5240231     |                 |             |             |
| DNAJC6 DNAJC6   | 311.5847694     | 885.5955735 | 399.1065216 |
| 373.330673      |                 |             |             |
| SOBP SOBP       | 11.71371313     | 11.17150379 | 16.07140355 |
| 3.771016899     |                 |             |             |
| ARGLU1 ARGLU1   | 4591.775549     | 3845.028488 | 3800.886941 |
| 4183.943249     |                 |             |             |
| TCEA3 TCEA3     | 3.51411394      | 41.63924142 | 571.4276819 |

|             |          |             |             |             |
|-------------|----------|-------------|-------------|-------------|
| 366.7313934 |          |             |             |             |
| CASP7       | CASP7    | 2543.047122 | 3304.733941 | 3492.851706 |
| 2811.293098 |          |             |             |             |
| MCAT        | MCAT     | 818.7885481 | 1086.682642 | 687.4989298 |
| 727.8062615 |          |             |             |             |
| ATP11AUN    | ATP11AUN |             | 2.342742627 | 2.031182508 |
| 8.035701777 | 0        |             |             |             |
| KCNMB3      | KCNMB3   | 44.51210991 | 31.48332888 | 43.7499319  |
| 55.62249926 |          |             |             |             |
| ZNF737      | ZNF737   | 411.151331  | 406.2365016 | 983.0341841 |
| 782.4860065 |          |             |             |             |
| DISP2       | DISP2    | 36.31251072 | 89.37203036 | 106.2498346 |
| 1.885508449 |          |             |             |             |
| CLDN8       | CLDN8    | 0           | 0           | 0.942754225 |
| CNTD1       | CNTD1    | 2613.3294   | 2915.76249  | 2673.210125 |
| 3018.699028 |          |             |             |             |
| SNW1        | SNW1     | 6887.663323 | 8218.164428 | 6926.774932 |
| 7322.372063 |          |             |             |             |
| PLEK2       | PLEK2    | 8.199599194 | 7.109138778 | 248.2138993 |
| 265.8566914 |          |             |             |             |
| KHDC1L      | KHDC1L   | 2.342742627 | 2.031182508 | 0           |
| EHBP1L1     | EHBP1L1  | 2875.716575 | 1634.086328 | 762.4988131 |
| 1510.292268 |          |             |             |             |
| ANKRD33     | ANKRD33  | 0           | 0.892855753 | 0           |
| LPCAT1      | LPCAT1   | 4594.118291 | 4220.797252 | 2690.174384 |
| 3849.2655   |          |             |             |             |
| C5orf28     | C5orf28  | 866.814772  | 932.3127712 | 1136.605374 |
| 1145.446383 |          |             |             |             |
| ARAP3       | ARAP3    | 126.5081019 | 49.76397145 | 42.85707615 |
| 28.28262674 |          |             |             |             |
| TRMT44      | TRMT44   | 641.9114798 | 796.2235432 | 824.9987158 |
| 732.5200326 |          |             |             |             |
| BUD31       | BUD31    | 5797.11663  | 7371.161322 | 6316.954453 |
| 5789.453694 |          |             |             |             |
| MNT         | MNT      | 73.79639275 | 26.40537261 | 47.32135491 |
| 47.13771124 |          |             |             |             |
| DDX4        | DDX4     | 0           | 1.015591254 | 0           |
| BRD7        | BRD7     | 3371.20664  | 4239.077894 | 3719.637067 |
| 4090.610581 |          |             |             |             |
| VGf         | VGf      | 0           | 1.015591254 | 0           |
| CEBPZ       | CEBPZ    | 3386.434467 | 4732.655244 | 6501.775594 |
| 5946.89365  |          |             |             |             |
| VPS37D      | VPS37D   | 0           | 0           | 5.357134518 |
| COL6A5      | COL6A5   | 0           | 0           | 0.942754225 |
| LPIN1       | LPIN1    | 3155.674318 | 2707.566283 | 5600.884139 |
| 5418.008529 |          |             |             |             |
| ATPAF2      | ATPAF2   | 1259.224162 | 1901.186828 | 1333.926495 |
| 906.9295642 |          |             |             |             |
| GP1BB       | GP1BB    | 0           | 0           | 8.92855753  |
| ZNF774      | ZNF774   | 29.28428284 | 67.02902277 | 27.67852834 |

|             |             |             |             |             |             |
|-------------|-------------|-------------|-------------|-------------|-------------|
| 27.33987252 |             |             |             |             |             |
| CHIC1       | CHIC1       | 182.7339249 | 139.1360018 | 178.5711506 |             |
| 212.1197006 |             |             |             |             |             |
| COA3        | COA3        | 3273.982821 | 4151.737047 | 2432.139071 |             |
| 2482.271874 |             |             |             |             |             |
| SPATA7      | SPATA7      | 153.4496421 | 127.964498  | 118.7498152 |             |
| 169.6957604 |             |             |             |             |             |
| ZC2HC1A     | ZC2HC1A     | 736.7925562 | 1322.299813 | 653.5704112 |             |
| 759.8599051 |             |             |             |             |             |
| ACBD3       | ACBD3       | 3019.795246 | 3431.682847 | 3409.816121 |             |
| 3258.158601 |             |             |             |             |             |
| FN3KRP      | FN3KRP      | 2936.627883 | 4523.443446 | 3413.387544 |             |
| 2936.67941  |             |             |             |             |             |
| ZNF329      | ZNF329      | 165.1633552 | 80.23170907 | 455.356434  |             |
| 395.9567744 |             |             |             |             |             |
| ZC3H14      | ZC3H14      | 4033.031432 | 4736.717609 | 3910.708198 |             |
| 4262.19185  |             |             |             |             |             |
| EIF1        | EIF1        | 28806.36334 | 33117.4152  | 46931.17695 |             |
| 33181.17769 |             |             |             |             |             |
| STK3        | STK3        | 456.8348122 | 365.6128515 | 456.2492898 |             |
| 629.7598221 |             |             |             |             |             |
| RXRG        | RXRG        | 0           | 2.031182508 | 0           | 2.828262674 |
| POC5        | POC5        | 1520.439965 | 1601.587408 | 1357.140745 |             |
| 1665.846715 |             |             |             |             |             |
| KIAA1324L   | KIAA1324L   |             | 153.4496421 | 255.928996  |             |
| 424.1064827 | 451.5792736 |             |             |             |             |
| RIN3        | RIN3        | 3152.160205 | 3884.636547 | 1643.747441 |             |
| 1580.056081 |             |             |             |             |             |
| FUT11       | FUT11       | 839.8732318 | 815.519777  | 920.5342814 |             |
| 1000.262232 |             |             |             |             |             |
| DMBX1       | DMBX1       | 2.342742627 | 9.140321286 | 0           | 0           |
| SPAG1       | SPAG1       | 898.4417974 | 611.3859349 | 481.2492509 |             |
| 467.6060955 |             |             |             |             |             |
| LEPREL2     | LEPREL2     | 12.88508445 | 8.124730032 | 321.4280711 |             |
| 172.5240231 |             |             |             |             |             |
| MTMR14      | MTMR14      | 5108.350298 | 7206.635539 | 5169.63481  |             |
| 4319.699858 |             |             |             |             |             |
| BCL3        | BCL3        | 7062.197649 | 5551.221795 | 2678.567259 |             |
| 4792.019724 |             |             |             |             |             |
| ARHGAP42    | ARHGAP42    |             | 18.74194102 | 27.42096386 | 0           |
|             | 6.599279573 |             |             |             |             |
| R3HDM2      | R3HDM2      | 1170.199942 | 771.8493531 | 1206.248122 |             |
| 1491.437184 |             |             |             |             |             |
| SCN1B       | SCN1B       | 1.171371313 | 3.046773762 | 31.24995136 |             |
| 17.91233027 |             |             |             |             |             |
| CLDN11      | CLDN11      | 0           | 0           | 14.28569205 | 0           |
| BDKRB2      | BDKRB2      | 0           | 0           | 0           | 0.942754225 |
| MTHFD2L     | MTHFD2L     | 208.5040938 | 194.9935208 | 195.5354099 |             |
| 158.3827098 |             |             |             |             |             |
| KLF15       | KLF15       | 0           | 0           | 3.571423012 | 7.542033798 |

|             |         |             |             |             |
|-------------|---------|-------------|-------------|-------------|
| WDR7        | WDR7    | 4061.144344 | 3338.248452 | 2439.281917 |
| 3148.799111 |         |             |             |             |
| HAUS5       | HAUS5   | 2971.769022 | 3048.804945 | 1780.354372 |
| 1978.841118 |         |             |             |             |
| PRR14       | PRR14   | 1943.305009 | 1220.740687 | 1283.033717 |
| 1142.61812  |         |             |             |             |
| ZFYVE26     | ZFYVE26 | 1157.314858 | 409.2832754 | 931.2485504 |
| 881.4752001 |         |             |             |             |
| WBSCR16     | WBSCR16 | 3630.0797   | 4762.10739  | 2873.209813 |
| 3070.55051  |         |             |             |             |
| RAB41       | RAB41   | 19.91331233 | 32.49892013 | 12.49998054 |
| 7.542033798 |         |             |             |             |
| TANG06      | TANG06  | 2308.772859 | 2993.963017 | 2341.96064  |
| 2592.574118 |         |             |             |             |
| TEX28       | TEX28   | 0           | 3.046773762 | 0           |
| 0R52I1      | OR52I1  | 7.028227881 | 0           | 0           |
| LING03      | LING03  | 407.6372171 | 375.768764  | 216.0710922 |
| 200.8066499 |         |             |             |             |
| SLITRK1     | SLITRK1 | 2.342742627 | 0           | 0           |
| CENPP       | CENPP   | 1316.621356 | 1542.683115 | 853.5700999 |
| 1034.201385 |         |             |             |             |
| PEX3        | PEX3    | 2049.899799 | 2823.343686 | 2092.853885 |
| 2228.670987 |         |             |             |             |
| CERS2       | CERS2   | 7673.653474 | 9070.24549  | 7044.631891 |
| 7641.022991 |         |             |             |             |
| ZNF90       | ZNF90   | 107.7661608 | 150.3075056 | 213.392525  |
| 107.4739816 |         |             |             |             |
| CEP131      | CEP131  | 953.4962492 | 983.0923339 | 568.7491147 |
| 557.1677468 |         |             |             |             |
| TCP1        | TCP1    | 24696.0214  | 28768.65345 | 22263.3582  |
| 23848.85362 |         |             |             |             |
| CCDC64      | CCDC64  | 1167.8572   | 483.4214369 | 741.070275  |
| 1220.866721 |         |             |             |             |
| GPR174      | GPR174  | 878.5284851 | 597.1676574 | 1044.641231 |
| 1349.081296 |         |             |             |             |
| ZNF385C     | ZNF385C | 51.54033779 | 62.96665775 | 93.74985407 |
| 90.50440557 |         |             |             |             |
| FAM134B     | FAM134B | 658.3106782 | 813.4885945 | 1932.13985  |
| 1751.63735  |         |             |             |             |
| SBF1        | SBF1    | 10501.34383 | 4123.300491 | 4237.493404 |
| 4155.660623 |         |             |             |             |
| MIR7705     | MIR7705 | 551.7158886 | 186.8687907 | 344.6423207 |
| 547.7402046 |         |             |             |             |
| CCDC15      | CCDC15  | 746.1635267 | 491.546167  | 311.6066578 |
| 331.8494871 |         |             |             |             |
| ATAD5       | ATAD5   | 2831.204465 | 2047.431968 | 1194.640998 |
| 1629.0793   |         |             |             |             |
| ZKSCAN3     | ZKSCAN3 | 336.183567  | 413.3456404 | 486.6063854 |
| 390.300249  |         |             |             |             |
| ATP10A      | ATP10A  | 1614.14967  | 1903.21801  | 2262.496478 |



|             |            |             |             |             |             |
|-------------|------------|-------------|-------------|-------------|-------------|
| 1972.241838 |            |             |             |             |             |
| GMEB1       | GMEB1      | 1645.776695 | 1717.364811 | 1697.318787 |             |
| 1434.87193  |            |             |             |             |             |
| VPREB3      | VPREB3     | 3.51411394  | 3.046773762 | 0           | 0           |
| GZMB        | GZMB       | 19284.28593 | 18211.58237 | 37291.90624 |             |
| 52931.8787  |            |             |             |             |             |
| GNG11       | GNG11      | 3.51411394  | 6.093547524 | 0           | 13.19855915 |
| GIP         | GIP        | 0           | 0           | 1.885508449 |             |
| GBP2        | GBP2       | 21499.34909 | 19197.72148 | 33099.94848 |             |
| 30630.08476 |            |             |             |             |             |
| LILRA4      | LILRA4     | 4.685485254 | 0           | 0           | 0.942754225 |
| FXYD7       | FXYD7      | 28.11291152 | 33.51451138 | 47.32135491 |             |
| 54.67974503 |            |             |             |             |             |
| TIGIT       | TIGIT      | 1901.135642 | 5308.495485 | 4647.314195 |             |
| 4700.572564 |            |             |             |             |             |
| TMEM101     | TMEM101    | 1692.631548 | 2176.412057 | 1649.104576 |             |
| 1313.256635 |            |             |             |             |             |
| ARL15       | ARL15      | 619.6554248 | 420.4547792 | 369.6422818 |             |
| 653.3286777 |            |             |             |             |             |
| ZFYVE20     | ZFYVE20    | 1740.657772 | 1446.201946 | 2245.532219 |             |
| 1679.988028 |            |             |             |             |             |
| PHF7        | PHF7       | 612.6271969 | 678.4149577 | 594.6419315 |             |
| 476.0908835 |            |             |             |             |             |
| EFCAB5      | EFCAB5     | 176.8770683 | 167.5725569 | 106.2498346 |             |
| 82.01961755 |            |             |             |             |             |
| ATP11B      | ATP11B     | 7978.210016 | 5911.75669  | 4878.563835 |             |
| 5865.816786 |            |             |             |             |             |
| GSE1        | GSE1       | 409.9799597 | 291.4746899 | 155.356901  |             |
| 358.2466054 |            |             |             |             |             |
| FBXW9       | FBXW9      | 566.9437157 | 738.3348417 | 505.3563562 |             |
| 407.2698251 |            |             |             |             |             |
| FAM83A-AS1  | FAM83A-AS1 |             | 0           | 0           | 0           |
| LZTS3       | LZTS3      | 37.48388203 | 27.42096386 | 258.9281684 | 3.771016899 |
| 163.0964809 |            |             |             |             |             |
| NDUFAF1     | NDUFAF1    | 2246.690179 | 2533.900179 | 1913.389879 |             |
| 1842.141755 |            |             |             |             |             |
| FUCA1       | FUCA1      | 590.371142  | 1177.070263 | 1238.390929 |             |
| 1408.474812 |            |             |             |             |             |
| AC01        | AC01       | 1225.254394 | 1284.722936 | 1933.032705 |             |
| 1577.227818 |            |             |             |             |             |
| EEF1A2      | EEF1A2     | 0           | 3.046773762 | 16.07140355 | 3.771016899 |
| DUSP3       | DUSP3      | 326.8125965 | 364.5972602 | 949.1056655 |             |
| 982.3499022 |            |             |             |             |             |
| PLCB3       | PLCB3      | 297.5283136 | 110.6994467 | 202.6782559 |             |
| 115.0160154 |            |             |             |             |             |
| RARRES2     | RARRES2    | 1.171371313 | 16.24946006 | 49.99992217 |             |
| 0.942754225 |            |             |             |             |             |
| RANGAP1     | RANGAP1    | 8404.589174 | 11229.3925  | 8053.558892 |             |
| 8484.788022 |            |             |             |             |             |
| PDE1B       | PDE1B      | 187.4194102 | 186.8687907 | 155.356901  |             |

|              |              |             |             |             |             |             |
|--------------|--------------|-------------|-------------|-------------|-------------|-------------|
| 259.2574118  |              |             |             |             |             |             |
| PDE4C        | PDE4C        | 0           | 0           | 0           | 1.885508449 |             |
| PDE3B        | PDE3B        | 8786.456222 |             | 7926.689738 | 10597.30493 |             |
| 11720.32052  |              |             |             |             |             |             |
| RPS19        | RPS19        | 27042.27814 |             | 34721.03379 | 49374.92314 |             |
| 32375.12283  |              |             |             |             |             |             |
| KRTAP19-8    | KRTAP19-8    |             | 0           | 0           | 2.678567259 | 0           |
| UBE2B        | UBE2B        | 2109.639736 |             | 1338.549273 | 2974.102513 |             |
| 2272.980436  |              |             |             |             |             |             |
| LOC285593    | LOC285593    |             | 0           | 0           | 8.92855753  |             |
| 8.484788022  |              |             |             |             |             |             |
| TFEC         | TFEC         | 0           | 7.109138778 | 44.64278765 | 2.828262674 |             |
| TRRAP        | TRRAP        | 2011.244545 |             | 901.8450336 | 925.8914159 |             |
| 1226.523246  |              |             |             |             |             |             |
| ZNF197-AS1   | ZNF197-AS1   |             |             | 5.856856567 | 13.2026863  |             |
| 11.60712479  |              | 12.25580492 |             |             |             |             |
| LOC100131655 | LOC100131655 |             |             | 36.31251072 | 40.62365016 |             |
| 60.71419121  |              | 32.99639787 |             |             |             |             |
| ERVK13-1     | ERVK13-1     |             |             | 308.0706554 | 178.7440607 |             |
| 717.8560254  |              | 516.6293151 |             |             |             |             |
| ROPN1L       | ROPN1L       | 78.481878   |             | 196.009112  | 0           | 1.885508449 |
| INSM1        | INSM1        | 0           | 2.031182508 | 13.3928363  | 16.02682182 |             |
| EIF4A3       | EIF4A3       | 14492.20589 |             | 22636.51346 | 12774.08726 |             |
| 12711.15521  |              |             |             |             |             |             |
| KIAA0195     | KIAA0195     |             |             | 2230.290981 | 1331.440134 |             |
| 1259.819468  |              | 1342.482016 |             |             |             |             |
| SOX8         | SOX8         | 10.54234182 |             | 1.015591254 | 314.2852251 |             |
| 176.29504    |              |             |             |             |             |             |
| CLSTN3       | CLSTN3       | 691.1090749 |             | 383.893494  | 431.2493287 |             |
| 367.6741476  |              |             |             |             |             |             |
| C15orf56     | C15orf56     |             |             | 2.342742627 | 0           | 0           |
| IL21R        | IL21R        | 11240.47912 |             | 7593.575807 | 7976.773298 | 0           |
| 10920.86494  |              |             |             |             |             |             |
| GOLGA8A      | GOLGA8A      | 1060.091039 |             | 201.0870683 | 232.1424958 |             |
| 887.1317255  |              |             |             |             |             |             |
| HSPBAP1      | HSPBAP1      | 559.9154878 |             | 567.715511  | 877.6772052 |             |
| 792.856303   |              |             |             |             |             |             |
| ALKBH7       | ALKBH7       | 797.7038645 |             | 1012.54448  | 1416.069224 |             |
| 849.4215565  |              |             |             |             |             |             |
| KIAA0247     | KIAA0247     |             |             | 4404.356139 | 3357.544686 |             |
| 3296.42344   |              | 3935.056134 |             |             |             |             |
| PMEPA1       | PMEPA1       | 35.1411394  |             | 46.71719769 | 441.9635978 |             |
| 247.0016069  |              |             |             |             |             |             |
| HLX          | HLX          | 4.685485254 |             | 5.07795627  | 4.464278765 |             |
| 5.656525348  |              |             |             |             |             |             |
| ZNF665       | ZNF665       | 24.59879758 |             | 16.24946006 | 278.5709949 |             |
| 163.0964809  |              |             |             |             |             |             |
| ATP6V1B1-AS1 | ATP6V1B1-AS1 |             | 0           | 3.046773762 | 11.60712479 |             |
| 0.942754225  |              |             |             |             |             |             |
| FARP1        | FARP1        | 55.05445173 |             | 39.60805891 | 68.74989298 |             |

|             |           |             |             |             |             |
|-------------|-----------|-------------|-------------|-------------|-------------|
| 11.3130507  |           |             |             |             |             |
| MAP3K15     | MAP3K15   | 466.2057828 | 510.8424008 | 615.1776138 |             |
| 694.8098636 |           |             |             |             |             |
| FIGNL2      | FIGNL2    | 1.171371313 | 1.015591254 | 8.035701777 |             |
| 6.599279573 |           |             |             |             |             |
| MTX2        | MTX2      | 1445.472201 | 1899.155645 | 1541.06903  |             |
| 1483.89515  |           |             |             |             |             |
| TRHDE       | TRHDE     | 0           | 0           | 0.892855753 | 1.885508449 |
| EDEM1       | EDEM1     | 17954.77949 | 11255.79787 | 11608.9105  |             |
| 12195.46865 |           |             |             |             |             |
| DGCR11      | DGCR11    | 202.6472372 | 165.5413744 | 119.6426709 |             |
| 143.2986422 |           |             |             |             |             |
| LINC01004   | LINC01004 |             | 278.7863726 | 88.3564391  |             |
| 185.7139966 |           | 289.425547  |             |             |             |
| CAMKMT      | CAMKMT    | 353.7541367 | 451.9381081 | 362.4994357 |             |
| 381.815461  |           |             |             |             |             |
| PXDC1       | PXDC1     | 17.5705697  | 21.32741634 | 52.67848943 |             |
| 85.79063445 |           |             |             |             |             |
| SPRR4       | SPRR4     | 0           | 0           | 3.571423012 | 0           |
| RTP4        | RTP4      | 1083.518465 | 866.2993397 | 2059.818222 |             |
| 1724.297477 |           |             |             |             |             |
| PARVG       | PARVG     | 3218.928369 | 4634.142892 | 2299.103564 |             |
| 2405.908781 |           |             |             |             |             |
| EPB41L4A    | EPB41L4A  |             | 100.737933  | 77.18493531 |             |
| 164.2854586 |           | 134.8138541 |             |             |             |
| ERRFI1      | ERRFI1    | 21.08468364 | 31.48332888 | 353.5708782 |             |
| 211.1769463 |           |             |             |             |             |
| YIPF5       | YIPF5     | 3829.212824 | 4496.022482 | 4728.564068 |             |
| 4206.569351 |           |             |             |             |             |
| CSRNP2      | CSRNP2    | 1391.58912  | 843.9563321 | 1199.105276 |             |
| 1087.938375 |           |             |             |             |             |
| ALKBH3      | ALKBH3    | 1625.863383 | 2050.478742 | 1558.926145 |             |
| 1690.358325 |           |             |             |             |             |
| PRKAB1      | PRKAB1    | 2462.222501 | 4046.115556 | 3024.102436 |             |
| 2573.719033 |           |             |             |             |             |
| HAA0        | HAA0      | 4.685485254 | 12.18709505 | 0.892855753 |             |
| 15.0840676  |           |             |             |             |             |
| MSRB1       | MSRB1     | 2517.276953 | 4459.461197 | 1805.354333 |             |
| 1577.227818 |           |             |             |             |             |
| GPATCH3     | GPATCH3   | 1048.377326 | 1355.814324 | 1426.783493 |             |
| 1260.462398 |           |             |             |             |             |
| C17orf75    | C17orf75  |             | 1335.363297 | 1442.139581 |             |
| 1519.640492 |           | 1444.299472 |             |             |             |
| SPATA31D1   | SPATA31D1 |             | 0           | 0           | 0.942754225 |
| H2AFB1      | H2AFB1    | 0           | 1.015591254 | 0.892855753 | 3.771016899 |
| ZNF793      | ZNF793    | 21.08468364 | 45.70160643 | 144.642632  |             |
| 194.2073703 |           |             |             |             |             |
| ZPBP        | ZPBP      | 0           | 1.015591254 | 7.142846024 | 2.828262674 |
| ATP1A2      | ATP1A2    | 0           | 0           | 0.892855753 | 0           |
| H2BFXP      | H2BFXP    | 5.856856567 | 13.2026863  | 10.71426904 |             |

|             |          |             |             |             |
|-------------|----------|-------------|-------------|-------------|
| 7.542033798 |          |             |             |             |
| CYP4Z2P     | CYP4Z2P  | 0           | 0           | 1.785711506 |
| CIDCEP      | CIDCEP   | 401.7803605 |             | 481.3902544 |
| 421.4111384 |          |             |             | 441.9635978 |
| ANKRD49     | ANKRD49  | 1304.907643 |             | 1267.457885 |
| 1898.707009 |          |             |             | 1722.318748 |
| MTERF3      | MTERF3   | 1645.776695 |             | 1923.529835 |
| 1684.7018   |          |             |             | 1949.996965 |
| MRPS12      | MRPS12   | 4910.388546 |             | 7750.992451 |
| 3706.909612 |          |             |             | 4307.136153 |
| IL13        | IL13     | 58.56856567 |             | 774.8961268 |
| 545.8546961 |          |             |             | 889.28433   |
| CNKSR1      | CNKSR1   | 151.1068994 |             | 181.7908345 |
| 246.0588527 |          |             |             | 236.6067746 |
| TBL1Y       | TBL1Y    | 1.171371313 | 0           | 0           |
| ACTR10      | ACTR10   | 4253.249239 |             | 4465.554744 |
| 4263.134604 |          |             |             | 4922.313766 |
| ZC3H15      | ZC3H15   | 5046.267618 |             | 5726.919082 |
| 5516.997723 |          |             |             | 5355.348807 |
| SMIM2       | SMIM2    | 0           | 0           | 0           |
| CRIP1       | CRIP1    | 10981.60606 |             | 11556.41288 |
| 5535.852808 |          |             |             | 1.885508449 |
| CNN1        | CNN1     | 1.171371313 | 0           | 7.142846024 |
| USP9Y       | USP9Y    | 1369.333065 | 0           | 0           |
| KIAA1107    | KIAA1107 | 158.0354683 |             | 36.31251072 |
| 102.7602105 |          |             |             | 37.5768764  |
| LAGE3       | LAGE3    | 1808.597308 |             | 2847.717876 |
| 1778.977222 |          |             |             | 2159.818067 |
| MRPL34      | MRPL34   | 3058.450499 |             | 4167.986507 |
| 2742.47204  |          |             |             | 2985.709638 |
| HTRA2       | HTRA2    | 4215.765357 |             | 5118.57992  |
| 3408.056522 |          |             |             | 3616.958656 |
| ZPR1        | ZPR1     | 3798.75717  |             | 5037.33262  |
| 4075.526513 |          |             |             | 4422.314545 |
| CHRD        | CHRD     | 0           | 0           | 0.892855753 |
| NDUFV1      | NDUFV1   | 8766.54291  |             | 12060.14614 |
| 8060.548621 |          |             |             | 7336.595723 |
| RPL23AP7    | RPL23AP7 |             |             | 201.4758659 |
| 494.6420872 |          |             |             | 514.9047658 |
| UQCR10      | UQCR10   | 7483.891322 |             | 8368.471933 |
| 5468.917258 |          |             |             | 6062.490563 |
| XP07        | XP07     | 5095.465214 |             | 4862.650924 |
| 4265.020113 |          |             |             | 3229.459259 |
| NUP88       | NUP88    | 6326.576464 |             | 8209.024106 |
| 8282.095864 |          |             |             | 8858.914782 |
| JAK2        | JAK2     | 4051.773373 |             | 4006.507497 |
| 3102.604154 |          |             |             | 2622.317347 |
| FAM177B     | FAM177B  | 2.342742627 | 0           | 24.10710533 |
| RHBDL1      | RHBDL1   | 3.51411394  | 7.109138778 | 0           |
| LAMB2P1     | LAMB2P1  | 11.71371313 | 8.124730032 | 0           |
|             |          |             |             | 7.542033798 |
|             |          |             |             | 8.92855753  |

|                 |              |             |             |             |
|-----------------|--------------|-------------|-------------|-------------|
| 29.22538097     |              |             |             |             |
| STBD1 STBD1     | 247.1593471  | 296.5526462 | 163.3926028 |             |
| 214.005209      |              |             |             |             |
| DPP4 DPP4       | 10668.84992  | 10934.87103 | 6434.811412 |             |
| 8625.258402     |              |             |             |             |
| PKLR PKLR       | 11.71371313  | 1.015591254 | 2.678567259 |             |
| 13.19855915     |              |             |             |             |
| AGRP AGRP       | 11.71371313  | 0           | 9.821413283 | 11.3130507  |
| DHX37 DHX37     | 1139.744288  | 627.635395  | 425.8921942 |             |
| 659.9279573     |              |             |             |             |
| SESN3 SESN3     | 602.0848551  | 392.0182241 | 958.034223  |             |
| 1753.522858     |              |             |             |             |
| SLC25A25-AS1    | SLC25A25-AS1 | 105.4234182 | 63.98224901 |             |
| 99.99984434     | 73.53482953  |             |             |             |
| POC1B-GALNT4    | POC1B-GALNT4 | 1370.504437 | 1861.578769 |             |
| 1139.283941     | 1230.294263  |             |             |             |
| GSTT2B GSTT2B   | 1.171371313  | 0           | 0           | 0           |
| FITM2 FITM2     | 92.53833376  | 121.8709505 | 109.8212576 |             |
| 104.6457189     |              |             |             |             |
| SOS1 SOS1       | 8905.936096  | 7466.6269   | 4069.636522 |             |
| 5444.405648     |              |             |             |             |
| MTSS1 MTSS1     | 1249.853191  | 496.6241232 | 860.7129459 |             |
| 797.5700741     |              |             |             |             |
| RIMS3 RIMS3     | 243.6452332  | 101.5591254 | 292.856687  |             |
| 269.6277083     |              |             |             |             |
| RNF144A RNF144A | 581.0001715  | 385.9246765 | 2817.852757 |             |
| 1998.638956     |              |             |             |             |
| COPRS COPRS     | 1803.911823  | 2645.615217 | 1667.854547 |             |
| 1454.669769     |              |             |             |             |
| DDIT4 DDIT4     | 4013.11812   | 4766.169755 | 5521.419977 |             |
| 8250.04222      |              |             |             |             |
| SNX27 SNX27     | 2814.805266  | 1892.046506 | 2147.318086 |             |
| 2342.744248     |              |             |             |             |
| DGCR9 DGCR9     | 3.51411394   | 0           | 0           | 21.68334717 |
| SH3RF3-AS1      | SH3RF3-AS1   | 0           | 7.109138778 | 9.821413283 |
| 21.68334717     |              |             |             |             |
| LOC100133315    | LOC100133315 | 267.0726595 | 259.991361  |             |
| 215.1782365     | 230.0320308  |             |             |             |
| ALOX15P1        | ALOX15P1     | 38.65525334 | 19.29623383 |             |
| 41.96422039     | 49.02321969  |             |             |             |
| DDX11L1 DDX11L1 | 2.342742627  | 0           | 0           | 1.885508449 |
| TMC05B TMC05B   | 0            | 0           | 0.892855753 | 0           |
| TMEM54 TMEM54   | 12.88508445  | 23.35859884 | 16.96425931 |             |
| 9.427542247     |              |             |             |             |
| SLC13A5 SLC13A5 | 3.51411394   | 14.21827756 | 42.85707615 |             |
| 5.656525348     |              |             |             |             |
| TTC9B TTC9B     | 0            | 0           | 0.892855753 | 0           |
| ZNF560 ZNF560   | 2.342742627  | 0           | 0           | 0.942754225 |
| PDIA3P1 PDIA3P1 | 105.4234182  | 116.7929942 | 209.821102  |             |
| 148.0124133     |              |             |             |             |

|             |             |             |             |             |             |
|-------------|-------------|-------------|-------------|-------------|-------------|
| FAM231D     | FAM231D     | 105.4234182 | 66.01343151 | 466.0707031 |             |
| 344.105292  |             |             |             |             |             |
| HNRNPKP3    | HNRNPKP3    | 0.892855753 | 5.856856567 | 1.015591254 |             |
| 0.892855753 | 0           |             |             |             |             |
| LOC90834    | LOC90834    | 25.89281684 | 23.42742627 | 18.28064257 |             |
| 25.89281684 | 18.85508449 |             |             |             |             |
| LINC00548   | LINC00548   | 0           | 14.21827756 | 9.821413283 |             |
| 0           |             |             |             |             |             |
| TEX41       | TEX41       | 0           | 0           | 1.885508449 |             |
| 0           | 0           |             |             |             |             |
| TSC1        | TSC1        | 1874.194102 | 1456.357858 | 2936.602572 |             |
| 2402.137765 |             |             |             |             |             |
| FOX E1      | FOX E1      | 0           | 0           | 13.3928363  | 0           |
| 0           | 0           |             |             |             |             |
| LRP2        | LRP2        | 0           | 3.046773762 | 8.92855753  | 0           |
| 0           | 0           |             |             |             |             |
| GCSH        | GCSH        | 370.1533351 | 469.2031594 | 321.4280711 |             |
| 345.0480462 |             |             |             |             |             |
| USP36       | USP36       | 3618.365987 | 3039.664623 | 4403.564574 |             |
| 3563.610969 |             |             |             |             |             |
| GCG         | GCG         | 0           | 1.015591254 | 0           | 0           |
| 0           | 0           |             |             |             |             |
| BTBD8       | BTBD8       | 29.28428284 | 21.32741634 | 89.2855753  |             |
| 74.47758375 |             |             |             |             |             |
| HMGXB3      | HMGXB3      | 5019.326078 | 4432.040233 | 3449.99463  |             |
| 3392.029701 |             |             |             |             |             |
| C9orf129    | C9orf129    | 0           | 2.342742627 | 0           | 0           |
| 0           | 0           |             |             |             |             |
| LINC00528   | LINC00528   | 204.4639674 | 66.76816487 | 114.7618117 |             |
| 204.4639674 | 63.16453306 |             |             |             |             |
| RNVU1-19    | RNVU1-19    | 38.39279738 | 8.199599194 | 12.18709505 |             |
| 38.39279738 | 4.713771124 |             |             |             |             |
| LINC00367   | LINC00367   | 0           | 0           | 2.678567259 | 0           |
| 0           | 0           |             |             |             |             |
| TSPEAR-AS1  | TSPEAR-AS1  | 0           | 1.171371313 | 1.015591254 | 0           |
| 0           | 0           |             |             |             |             |
| NBPF18P     | NBPF18P     | 0           | 4.062365016 | 0           | 2.828262674 |
| 0           | 0           |             |             |             |             |
| PGAM2       | PGAM2       | 38.65525334 | 35.54569389 | 48.21421066 |             |
| 30.16813519 |             |             |             |             |             |
| GLTP        | GLTP        | 2459.879758 | 3988.226855 | 3256.244931 |             |
| 2935.736656 |             |             |             |             |             |
| ZSCAN29     | ZSCAN29     | 855.1010588 | 362.5660777 | 595.5347873 |             |
| 587.335882  |             |             |             |             |             |
| C9orf142    | C9orf142    | 2162.496634 | 2211.54904  | 2401.873316 |             |
| 2162.496634 | 2288.064503 |             |             |             |             |
| ATF1        | ATF1        | 1474.756484 | 1328.39336  | 1931.246994 |             |
| 1978.841118 |             |             |             |             |             |
| IP09        | IP09        | 9789.150067 | 10307.23564 | 6320.525876 |             |
| 7534.491764 |             |             |             |             |             |
| MFN2        | MFN2        | 7606.88531  | 8892.51702  | 8411.594049 |             |
| 7060.286389 |             |             |             |             |             |
| DENND4B     | DENND4B     | 5045.096247 | 3010.212477 | 3620.530079 |             |
| 3169.539703 |             |             |             |             |             |
| FAIM3       | FAIM3       | 4936.158715 | 4418.837546 | 7252.667282 |             |
| 5681.036958 |             |             |             |             |             |
| LINC01010   | LINC01010   | 0           | 3.51411394  | 0           | 26.78567259 |
| 0           | 0           |             |             |             |             |

|              |              |             |             |             |             |
|--------------|--------------|-------------|-------------|-------------|-------------|
|              |              | 6.599279573 |             |             |             |
| HAX1         | HAX1         | 8173.829025 | 11876.32412 | 9357.128292 |             |
| 8226.473365  |              |             |             |             |             |
| FAM83G       | FAM83G       | 547.0304034 | 536.2321821 | 575.8919607 |             |
| 602.4199496  |              |             |             |             |             |
| MAK          | MAK          | 167.5060978 | 154.3698706 | 124.1069497 |             |
| 180.0660569  |              |             |             |             |             |
| RAD51L3-RFFL | RAD51L3-RFFL |             | 5433.991523 | 2908.653352 |             |
| 3583.030137  |              | 4265.962867 |             |             |             |
| ORC6         | ORC6         | 2901.486743 | 2519.681901 | 1263.390891 |             |
| 1700.728621  |              |             |             |             |             |
| PTGS2        | PTGS2        | 10.54234182 | 34.53010264 | 16.07140355 | 0           |
| NACA2        | NACA2        | 1.171371313 | 1.015591254 | 0           | 1.885508449 |
| CD27         | CD27         | 8312.05084  | 11246.65755 | 4820.528211 |             |
| 5813.02255   |              |             |             |             |             |
| TCEB3        | TCEB3        | 6251.6087   | 7668.729559 | 6322.311587 |             |
| 6531.401269  |              |             |             |             |             |
| KRTAP5-7     | KRTAP5-7     |             | 0           | 0           | 2.828262674 |
| NUDT19       | NUDT19       | 695.7945602 | 430.6106917 | 341.0708977 |             |
| 381.815461   |              |             |             |             |             |
| MED4         | MED4         | 4464.096076 | 4601.643972 | 4716.956943 |             |
| 4530.876804  |              |             |             |             |             |
| FSCN3        | FSCN3        | 0           | 2.031182508 | 9.821413283 | 13.19855915 |
| ZC3H7A       | ZC3H7A       | 6517.509988 | 5727.934673 | 6428.561422 |             |
| 6592.680293  |              |             |             |             |             |
| TMOD4        | TMOD4        | 79.65324932 | 54.84192772 | 81.24987353 |             |
| 123.5008034  |              |             |             |             |             |
| TAF1B        | TAF1B        | 1751.200114 | 1619.86805  | 887.4986185 |             |
| 1189.755832  |              |             |             |             |             |
| MSH4         | MSH4         | 7.028227881 | 3.046773762 | 2.678567259 |             |
| 1.885508449  |              |             |             |             |             |
| FZD7         | FZD7         | 11.71371313 | 22.34300759 | 61.60704696 |             |
| 11.3130507   |              |             |             |             |             |
| REEP5        | REEP5        | 11861.30592 | 13797.82278 | 8173.201563 |             |
| 8761.957765  |              |             |             |             |             |
| NUDT11       | NUDT11       | 30.45565415 | 67.02902277 | 119.6426709 |             |
| 53.73699081  |              |             |             |             |             |
| SLC5A6       | SLC5A6       | 4721.797765 | 6415.489952 | 4874.992412 |             |
| 4723.198666  |              |             |             |             |             |
| PSMD8        | PSMD8        | 14478.14943 | 20966.88144 | 11380.33943 |             |
| 11040.59473  |              |             |             |             |             |
| PSMD7        | PSMD7        | 9484.593525 | 13208.77985 | 9423.199617 |             |
| 9032.528227  |              |             |             |             |             |
| GTF3A        | GTF3A        | 14698.36724 | 23215.40048 | 14552.65592 |             |
| 11840.99306  |              |             |             |             |             |
| PSMC6        | PSMC6        | 7410.094929 | 7061.405989 | 5518.741409 |             |
| 6319.281568  |              |             |             |             |             |
| ZNF624       | ZNF624       | 345.5545375 | 226.4768497 | 513.392058  |             |
| 790.0280403  |              |             |             |             |             |
| SLC25A24     | SLC25A24     |             | 2328.686171 | 1883.921776 |             |

|              |              |             |             |             |             |
|--------------|--------------|-------------|-------------|-------------|-------------|
| 1702.675921  |              | 2107.998446 |             |             |             |
| LMF2         | LMF2         | 3935.807613 | 3155.442026 | 2350.889198 |             |
| 2529.409585  |              |             |             |             |             |
| ZNF430       | ZNF430       | 1829.681992 | 1903.21801  | 3199.995019 |             |
| 2970.618562  |              |             |             |             |             |
| CCDC174      | CCDC174      | 798.8752358 | 952.6245963 | 1495.533386 |             |
| 1343.42477   |              |             |             |             |             |
| PRPF4B       | PRPF4B       | 2666.041109 | 1785.409425 | 1933.925561 |             |
| 2723.616955  |              |             |             |             |             |
| SHFM1        | SHFM1        | 8049.663666 | 7527.562375 | 4381.24318  |             |
| 5070.132221  |              |             |             |             |             |
| AIMP2        | AIMP2        | 3717.932549 | 5110.45519  | 2811.602766 |             |
| 3084.691823  |              |             |             |             |             |
| DYNC1LI1     | DYNC1LI1     |             | 2473.936214 | 2683.192093 |             |
| 2170.532336  |              | 2014.665778 |             |             |             |
| LINC00923    | LINC00923    |             | 0           | 0           | 3.571423012 |
| 1.885508449  |              |             |             |             |             |
| HSD17B3      | HSD17B3      | 0           | 0           | 0           | 3.771016899 |
| ZNF615       | ZNF615       | 694.6231889 | 530.1386346 | 1394.640686 |             |
| 1158.644942  |              |             |             |             |             |
| SMIM5        | SMIM5        | 0           | 4.062365016 | 0           | 2.828262674 |
| NDUFS8       | NDUFS8       | 5180.975319 | 6414.474361 | 3958.029553 |             |
| 4093.438844  |              |             |             |             |             |
| C3orf38      | C3orf38      | 2607.472544 | 2301.329782 | 2668.745846 |             |
| 2804.693819  |              |             |             |             |             |
| INTS4        | INTS4        | 3553.940565 | 4166.970915 | 3522.315946 |             |
| 4010.476472  |              |             |             |             |             |
| TCF20        | TCF20        | 839.8732318 | 353.4257564 | 353.5708782 |             |
| 477.0336377  |              |             |             |             |             |
| TRAPPC3      | TRAPPC3      | 4895.160719 | 5854.88358  | 4256.243375 |             |
| 3277.013685  |              |             |             |             |             |
| SMC1B        | SMC1B        | 18.74194102 | 23.35859884 | 97.32127708 |             |
| 64.10728728  |              |             |             |             |             |
| SNORA58      | SNORA58      | 12.88508445 | 17.26505132 | 0           | 10.37029647 |
| CYB5R4       | CYB5R4       | 3254.069509 | 3617.536047 | 2733.03146  |             |
| 3025.298307  |              |             |             |             |             |
| GLTSCR1      | GLTSCR1      | 111.2802748 | 46.71719769 | 101.7855558 |             |
| 81.07686333  |              |             |             |             |             |
| C14orf1      | C14orf1      | 2398.96845  | 2821.312504 | 2772.317113 |             |
| 3006.443223  |              |             |             |             |             |
| PNKP         | PNKP         | 1826.167878 | 2013.917457 | 1218.748103 |             |
| 1416.9596    |              |             |             |             |             |
| C1orf234     | C1orf234     |             | 0           | 0           | 11.60712479 |
| AATK         | AATK         | 16.39919839 | 4.062365016 | 0           | 8.484788022 |
| TTC34        | TTC34        | 2.342742627 | 0           | 0.892855753 | 0           |
| TNN          | TNN          | 4.685485254 | 7.109138778 | 5.357134518 |             |
| 0.942754225  |              |             |             |             |             |
| ZNF777       | ZNF777       | 415.8368163 | 650.9939938 | 441.070742  |             |
| 551.5112215  |              |             |             |             |             |
| LOC101927196 | LOC101927196 |             | 0           | 0           | 5.357134518 |
|              |              |             |             |             | 0           |



|              |              |             |             |             |             |
|--------------|--------------|-------------|-------------|-------------|-------------|
| NOL7         | NOL7         | 4584.747321 | 5974.723348 | 5708.026829 |             |
| 5172.892431  |              |             |             |             |             |
| DENND2A      | DENND2A      | 0           | 0           | 30.3570956  | 11.3130507  |
| RAB4B        | RAB4B        | 2380.226509 | 2570.461464 | 2091.961029 |             |
| 2035.406371  |              |             |             |             |             |
| SHANK1       | SHANK1       | 1.171371313 | 0           | 0           | 0           |
| WDR830S      | WDR830S      | 5970.479585 | 6706.964642 | 6007.133506 |             |
| 5274.709887  |              |             |             |             |             |
| LIN7B        | LIN7B        | 122.9939879 | 66.01343151 | 304.4638118 |             |
| 227.2037682  |              |             |             |             |             |
| HOXB5        | HOXB5        | 0           | 1.015591254 | 0           | 0.942754225 |
| C19orf60     | C19orf60     |             | 2288.859547 | 3672.377975 |             |
| 3806.244075  |              | 2653.853143 |             |             |             |
| ASXL1        | ASXL1        | 4548.43481  | 2656.786721 | 2477.674715 |             |
| 3077.149789  |              |             |             |             |             |
| EMC8         | EMC8         | 2719.92419  | 3469.259724 | 2261.603622 |             |
| 2208.873149  |              |             |             |             |             |
| CD247        | CD247        | 14881.10117 | 14875.3651  | 15276.76193 |             |
| 14162.05396  |              |             |             |             |             |
| ZNF230       | ZNF230       | 286.9859718 | 240.6951272 | 576.7848165 |             |
| 579.7938482  |              |             |             |             |             |
| PCNXL3       | PCNXL3       | 1627.034754 | 656.0719501 | 862.4986574 |             |
| 856.9635903  |              |             |             |             |             |
| BRSK1        | BRSK1        | 8.199599194 | 4.062365016 | 2.678567259 |             |
| 7.542033798  |              |             |             |             |             |
| FAR1         | FAR1         | 4035.374175 | 3277.312977 | 2474.996147 |             |
| 2759.441616  |              |             |             |             |             |
| CCDC88B      | CCDC88B      | 7216.818662 | 6978.127507 | 3705.351375 |             |
| 4924.005316  |              |             |             |             |             |
| SLC04C1      | SLC04C1      | 23.42742627 | 30.46773762 | 24.10710533 |             |
| 38.65292321  |              |             |             |             |             |
| F8A2         | F8A2         | 607.9417117 | 680.4461402 | 740.1774193 |             |
| 877.7041832  |              |             |             |             |             |
| RBM47        | RBM47        | 65.59679355 | 40.62365016 | 22.32139383 |             |
| 0.942754225  |              |             |             |             |             |
| USP46        | USP46        | 823.4740334 | 1036.91867  | 370.5351375 |             |
| 279.0552505  |              |             |             |             |             |
| OSER1-AS1    | OSER1-AS1    |             | 96.0524477  | 80.23170907 |             |
| 1016.962703  | 296.9675808  |             |             |             |             |
| LOC100507091 | LOC100507091 |             | 3.51411394  | 1.015591254 |             |
| 6.249990271  | 3.771016899  |             |             |             |             |
| LOC100506844 | LOC100506844 |             | 705.1655307 | 793.1767694 |             |
| 593.7490758  | 459.1213074  |             |             |             |             |
| LOC100507557 | LOC100507557 |             | 192.1048954 | 96.48116913 |             |
| 141.071209   | 280.940759   |             |             |             |             |
| LINC01364    | LINC01364    |             | 2.342742627 | 0           | 0           |
| ATP6V0E2-AS1 | ATP6V0E2-AS1 |             | 97.22381902 | 120.8553592 | 0           |
| 523.2134713  | 251.715378   |             |             |             |             |
| ADCY10P1     | ADCY10P1     |             | 40.99799597 | 16.24946006 |             |
| 49.99992217  | 83.905126    |             |             |             |             |

|           |           |             |             |             |             |
|-----------|-----------|-------------|-------------|-------------|-------------|
| C5orf27   | C5orf27   | 3.51411394  | 0           | 0           | 0           |
| EGFL6     | EGFL6     | 162.8206126 | 640.8380813 |             | 53.57134518 |
|           |           | 95.2181767  |             |             |             |
| RNF44     | RNF44     | 638.3973658 | 230.5392147 |             | 246.4281878 |
|           |           | 412.9263504 |             |             |             |
| TBC1D30   | TBC1D30   | 179.219811  | 34.53010264 |             | 99.10698859 |
|           |           | 103.7029647 |             |             |             |
| XK        | XK        | 0           | 4.062365016 | 23.21424958 | 7.542033798 |
| ARFIP1    | ARFIP1    | 1354.105238 | 1244.099286 |             | 895.5343203 |
|           |           | 1497.093709 |             |             |             |
| MYH6      | MYH6      | 44.51210991 | 32.49892013 |             | 0.892855753 |
|           |           | 65.05004151 |             |             |             |
| MYH3      | MYH3      | 77.31050669 | 35.54569389 |             | 114.2855364 |
|           |           | 86.73338867 |             |             |             |
| POLR2B    | POLR2B    | 11863.64866 | 10157.94372 |             | 10244.62691 |
|           |           | 11212.17599 |             |             |             |
| AZU1      | AZU1      | 0           | 1.015591254 | 0           | 0           |
| CACNA2D1  | CACNA2D1  |             | 0           | 0           | 0.942754225 |
| TAGLN     | TAGLN     | 17.5705697  | 17.26505132 |             | 70.53560449 |
|           |           | 47.13771124 |             |             |             |
| TGFBR3L   | TGFBR3L   | 35.1411394  | 22.34300759 |             | 21.42853807 |
|           |           | 16.02682182 |             |             |             |
| ISM1      | ISM1      | 2.342742627 | 3.046773762 |             | 62.49990271 |
|           |           | 31.11088942 |             |             |             |
| MIR4444-1 | MIR4444-1 |             | 376.0101916 |             | 338.1918876 |
|           |           | 274.9995719 |             |             |             |
| EFEMP2    | EFEMP2    | 46.85485254 | 22.34300759 |             | 94.64270982 |
|           |           | 82.01961755 |             |             |             |
| WTH3DI    | WTH3DI    | 3.51411394  | 3.046773762 | 0           | 3.771016899 |
| ALDOB     | ALDOB     | 3.51411394  | 0           | 0           | 1.885508449 |
| DARS      | DARS      | 8650.57715  | 9382.032005 |             | 10195.51984 |
|           |           | 11578.90739 |             |             |             |
| RSPH10B2  | RSPH10B2  |             | 4.685485254 |             | 3.046773762 |
|           |           | 11.60712479 |             |             |             |
| CFAP69    | CFAP69    | 0           | 0           | 1.785711506 | 0           |
| CLHC1     | CLHC1     | 121.8226166 | 58.90429273 |             | 110.7141134 |
|           |           | 84.84788022 |             |             |             |
| IFITM1    | IFITM1    | 9497.47861  | 9191.100849 |             | 48936.53097 |
|           |           | 35305.20296 |             |             |             |
| RPS16     | RPS16     | 10709.84792 | 12578.09768 |             | 10415.16236 |
|           |           | 9389.832078 |             |             |             |
| WDFY2     | WDFY2     | 1238.139478 | 1972.278215 |             | 1325.890793 |
|           |           | 963.4948177 |             |             |             |
| CHRNA2    | CHRNA2    | 0           | 0           | 5.357134518 | 8.484788022 |
| MORF4L1   | MORF4L1   | 14081.05456 | 13609.9384  |             | 12841.9443  |
|           |           | 12684.75809 |             |             |             |
| ICE1      | ICE1      | 3737.845861 | 1715.333628 |             | 3036.602416 |
|           |           | 3039.43962  |             |             |             |
| EXOC3     | EXOC3     | 3551.597822 | 4789.528354 |             | 3094.63804  |
|           |           | 3037.554112 |             |             |             |

|              |              |             |             |             |             |
|--------------|--------------|-------------|-------------|-------------|-------------|
| RCOR1        | RCOR1        | 387.7239048 | 208.1962071 | 155.356901  |             |
| 214.9479632  |              |             |             |             |             |
| CCL25        | CCL25        | 8.199599194 | 9.140321286 | 42.85707615 |             |
| 20.74059294  |              |             |             |             |             |
| ZP2          | ZP2          | 0           | 0           | 11.60712479 | 0           |
| BSN          | BSN          | 16.39919839 | 1.015591254 | 24.10710533 | 0           |
| LOC102724784 | LOC102724784 | 0           | 0           | 0           | 2.828262674 |
| LINC01499    | LINC01499    | 0           | 0           | 3.571423012 | 0           |
| B3GNT5       | B3GNT5       | 35.1411394  | 59.91988399 | 3.571423012 |             |
| 50.90872813  |              |             |             |             |             |
| SLC25A2      | SLC25A2      | 0           | 0           | 0.942754225 |             |
| ANKRD11      | ANKRD11      | 4555.463038 | 4563.051504 | 5949.097882 |             |
| 5472.688274  |              |             |             |             |             |
| ZNF25        | ZNF25        | 634.8832519 | 467.1719769 | 1288.390852 |             |
| 1093.594901  |              |             |             |             |             |
| C1orf137     | C1orf137     |             | 1.171371313 | 1.015591254 | 0           |
| 4.713771124  |              |             |             |             |             |
| KIAA1875     | KIAA1875     |             | 15.22782708 | 2.031182508 |             |
| 18.74997081  | 16.02682182  |             |             |             |             |
| LHX2         | LHX2         | 0           | 0           | 0.942754225 |             |
| BRAT1        | BRAT1        | 5903.71142  | 8954.468087 | 4714.278376 |             |
| 4867.440062  |              |             |             |             |             |
| HIBADH       | HIBADH       | 2072.155854 | 2080.94648  | 1978.568349 |             |
| 2348.400774  |              |             |             |             |             |
| ARL11        | ARL11        | 126.5081019 | 156.4010531 | 121.4283824 |             |
| 42.42394011  |              |             |             |             |             |
| CPO          | CPO          | 0           | 0           | 7.142846024 | 3.771016899 |
| OR10P1       | OR10P1       | 2.342742627 | 0           | 6.249990271 | 0.942754225 |
| MRPL44       | MRPL44       | 2278.317205 | 2862.951745 | 2544.638896 |             |
| 2095.742642  |              |             |             |             |             |
| KRCC1        | KRCC1        | 1451.329057 | 1753.926096 | 2244.639363 |             |
| 2104.22743   |              |             |             |             |             |
| BLOC1S6      | BLOC1S6      | 2673.069337 | 2264.768497 | 3067.852367 |             |
| 3814.383593  |              |             |             |             |             |
| ELM01-AS1    | ELM01-AS1    |             | 1078.83298  | 1085.667051 |             |
| 713.3917467  | 826.7954551  |             |             |             |             |
| SYNJ2-IT1    | SYNJ2-IT1    |             | 2.342742627 | 5.07795627  | 0           |
| 0            |              |             |             |             |             |
| R3HDM1       | R3HDM1       | 3176.759002 | 2326.719563 | 1723.211603 |             |
| 2118.368743  |              |             |             |             |             |
| SPTBN2       | SPTBN2       | 1.171371313 | 0           | 0           | 8.484788022 |
| TPPP         | TPPP         | 25.7701689  | 9.140321286 | 35.71423012 |             |
| 107.4739816  |              |             |             |             |             |
| TOPBP1       | TOPBP1       | 7905.584995 | 5443.569122 | 3256.244931 |             |
| 4594.041337  |              |             |             |             |             |
| DUSP14       | DUSP14       | 797.7038645 | 1501.043873 | 1341.962197 |             |
| 868.276641   |              |             |             |             |             |
| SRSF1        | SRSF1        | 17556.51325 | 8892.51702  | 5643.741215 |             |
| 8602.632301  |              |             |             |             |             |
| ZNF346       | ZNF346       | 2072.155854 | 2433.356645 | 2106.246721 |             |

|                 |             |             |             |             |
|-----------------|-------------|-------------|-------------|-------------|
| 2126.853531     |             |             |             |             |
| ITGB1BP2        | ITGB1BP2    |             | 39.82662466 | 16.24946006 |
| 30.3570956      | 22.62610139 |             |             |             |
| SLFN12 SLFN12   | 467.3771541 |             | 555.528416  | 162.4997471 |
| 220.6044886     |             |             |             |             |
| MYOZ2 MYOZ2     | 1.171371313 | 0           | 0           | 1.885508449 |
| PLA2G4A PLA2G4A | 12.88508445 | 64.99784026 | 0           | 16.02682182 |
| CLDN22 CLDN22   | 0           | 0           | 5.357134518 | 7.542033798 |
| LOC729296       | LOC729296   | 0           | 4.062365016 | 0           |
| GALNS GALNS     | 1192.455997 | 1270.504659 | 963.3913575 | 0           |
| 1202.954391     |             |             |             |             |
| TMEM221 TMEM221 | 5.856856567 | 3.046773762 | 6.249990271 |             |
| 3.771016899     |             |             |             |             |
| COG4 COG4       | 6046.61872  | 5886.366908 | 4068.743667 |             |
| 4773.16464      |             |             |             |             |
| IKBKE IKBKE     | 10372.49298 | 18923.51184 | 3990.17236  |             |
| 6008.172674     |             |             |             |             |
| SH3TC1 SH3TC1   | 2349.770855 | 1358.861098 | 831.2487061 |             |
| 1627.193792     |             |             |             |             |
| STAG1 STAG1     | 4289.56175  | 3957.759117 | 3024.102436 |             |
| 3931.285117     |             |             |             |             |
| ARHGEF5 ARHGEF5 | 126.5081019 | 111.7150379 | 102.6784116 |             |
| 96.16093092     |             |             |             |             |
| ZDHHC1 ZDHHC1   | 25.7701689  | 9.140321286 | 7.142846024 |             |
| 11.3130507      |             |             |             |             |
| IER5 IER5       | 5640.152874 | 8117.620894 | 7291.952935 |             |
| 5703.66306      |             |             |             |             |
| CLEC2A CLEC2A   | 0           | 2.031182508 | 0           | 0           |
| TSSC1 TSSC1     | 2769.121785 | 3413.402205 | 2088.389606 |             |
| 2187.189801     |             |             |             |             |
| NR6A1 NR6A1     | 22.25605496 | 32.49892013 | 33.03566286 |             |
| 10.37029647     |             |             |             |             |
| GMDS GMDS       | 1088.20395  | 1507.137421 | 827.6772831 |             |
| 1047.399944     |             |             |             |             |
| TCEANC2 TCEANC2 | 1249.853191 | 1144.571343 | 1462.497723 |             |
| 1236.893543     |             |             |             |             |
| AP4E1 AP4E1     | 1625.863383 | 1125.275109 | 1049.998366 |             |
| 1049.285452     |             |             |             |             |
| NCR3LG1 NCR3LG1 | 62.08267961 | 14.21827756 | 213.392525  |             |
| 97.10368515     |             |             |             |             |
| ACACB ACACB     | 261.2158029 | 149.2919143 | 396.4279543 |             |
| 349.7618174     |             |             |             |             |
| TYROBP TYROBP   | 2.342742627 | 6.093547524 | 72.321316   |             |
| 19.79783872     |             |             |             |             |
| AEN AEN         | 4659.715085 | 8147.07304  | 12249.98093 |             |
| 4906.092985     |             |             |             |             |
| TAS2R4 TAS2R4   | 3.51411394  | 1.015591254 | 0           | 0           |
| TAS2R3 TAS2R3   | 4.685485254 | 0           | 0           | 0           |
| POLA1 POLA1     | 3367.692526 | 2177.427649 | 1316.06938  |             |
| 2036.349125     |             |             |             |             |

|              |              |             |      |             |             |
|--------------|--------------|-------------|------|-------------|-------------|
| SHC3         | SHC3         | 0           | 0    | 3.571423012 | 0           |
| EFCAB14      | EFCAB14      | 8791.141708 |      | 9367.813727 | 11405.33939 |
|              |              | 11662.81251 |      |             |             |
| TTC19        | TTC19        | 3043.222672 |      | 3542.382294 | 3849.994007 |
|              |              | 3541.927622 |      |             |             |
| DYRK3        | DYRK3        | 393.5807613 |      | 439.751013  | 292.856687  |
|              |              | 482.6901631 |      |             |             |
| C12orf79     | C12orf79     |             |      | 48.02622385 | 68.04461402 |
|              |              | 433.927896  |      | 392.1857575 |             |
| GUCD1        | GUCD1        | 8217.169764 |      | 8521.826213 | 7187.488812 |
|              |              | 7046.145076 |      |             |             |
| EPB41L4A-AS1 | EPB41L4A-AS1 |             |      | 172.1915831 | 126.9489068 |
|              |              | 391.0708198 |      | 292.2538097 |             |
| LINC01358    | LINC01358    |             |      | 106.5947895 | 86.32525659 |
|              |              | 80.35701777 |      | 57.50800771 |             |
| GNRHR        | GNRHR        | 5.856856567 |      | 0           | 4.464278765 |
|              |              | RGMB        | RGMB | 38.65525334 | 101.5591254 |
|              |              | 196.0928787 |      | 516.0706253 | 20.74059294 |
| CHAC2        | CHAC2        | 1575.494417 |      | 1818.923936 | 983.0341841 |
|              |              | 1006.861512 |      |             |             |
| VCX3B        | VCX3B        | 0           | 0    | 0.892855753 | 0           |
| CCNA2        | CCNA2        | 16715.46864 |      | 16458.67186 | 5335.70598  |
|              |              | 8460.276413 |      |             |             |
| WDR11-AS1    | WDR11-AS1    |             |      | 10.54234182 | 19.29623383 |
|              |              | 6.249990271 |      | 6.599279573 |             |
| ARPIN        | ARPIN        | 0           | 0    | 1.785711506 | 6.599279573 |
| VAV2         | VAV2         | 296.3569423 |      | 360.5348952 | 292.856687  |
|              |              | 361.0748681 |      |             |             |
| TMEM86A      | TMEM86A      | 94.88107639 |      | 76.16934405 | 99.10698859 |
|              |              | 96.16093092 |      |             |             |
| LINC00167    | LINC00167    |             |      | 44.51210991 | 59.91988399 |
|              |              | 153.5711895 |      | 81.07686333 |             |
| NSUN3        | NSUN3        | 808.2462063 |      | 866.2993397 | 770.5345149 |
|              |              | 654.271432  |      |             |             |
| LOC102723631 | LOC102723631 |             |      | 9.370970508 | 0           |
|              |              | 2.828262674 |      |             | 0           |
| ZNF561       | ZNF561       | 767.2482103 |      | 687.555279  | 1116.962547 |
|              |              | 1112.449985 |      |             |             |
| SRGAP2C      | SRGAP2C      | 604.4275977 |      | 581.9337886 | 332.1423401 |
|              |              | 385.5864779 |      |             |             |
| ZNF449       | ZNF449       | 264.7299168 |      | 178.7440607 | 338.3923304 |
|              |              | 240.4023273 |      |             |             |
| ZCCHC5       | ZCCHC5       | 1.171371313 |      | 4.062365016 | 0           |
| SAMD9L       | SAMD9L       | 10186.24494 |      | 9034.699796 | 9810.699014 |
|              |              | 11709.00747 |      |             |             |
| NUP107       | NUP107       | 8075.433835 |      | 9045.8713   | 6488.382757 |
|              |              | 6951.869653 |      |             |             |
| TADA2B       | TADA2B       | 469.7198967 |      | 440.7666043 | 541.9634421 |
|              |              | 374.2734272 |      |             |             |
| KAZALD1      | KAZALD1      | 4.685485254 |      | 1.015591254 | 0           |
|              |              |             |      |             | 0           |

|             |           |             |             |             |             |
|-------------|-----------|-------------|-------------|-------------|-------------|
| MSL2        | MSL2      | 2757.408072 | 1995.636814 | 3636.601482 |             |
| 3393.915209 |           |             |             |             |             |
| PNPO        | PNPO      | 3702.704722 | 4136.503178 | 2568.746001 |             |
| 2976.275087 |           |             |             |             |             |
| TMEM176A    | TMEM176A  | 0           | 0           | 21.42853807 | 0           |
| SPEF2       | SPEF2     | 46.85485254 | 46.71719769 | 320.5352153 |             |
| 169.6957604 |           |             |             |             |             |
| HPDL        | HPDL      | 299.8710562 | 606.3079787 | 388.3922526 |             |
| 301.6813519 |           |             |             |             |             |
| NUTM2D      | NUTM2D    | 2.342742627 | 0           | 1.785711506 | 0.942754225 |
| SOX2-OT     | SOX2-OT   | 0           | 8.124730032 | 10.71426904 | 16.02682182 |
| CISTR       | CISTR     | 0           | 0           | 5.357134518 | 0           |
| MIR6822     | MIR6822   | 7.028227881 | 0           | 1.785711506 | 0           |
| SYNGR2      | SYNGR2    | 12167.03383 | 21600.61038 | 15683.90416 |             |
| 12155.87297 |           |             |             |             |             |
| TNFRSF11B   | TNFRSF11B | 0           | 5.07795627  | 0           | 0           |
| FAM127B     | FAM127B   | 643.0828511 | 558.5751897 | 945.5342425 |             |
| 795.6845657 |           |             |             |             |             |
| PRR22       | PRR22     | 74.96776406 | 59.91988399 | 54.46420093 |             |
| 22.62610139 |           |             |             |             |             |
| ZNF277      | ZNF277    | 507.2037787 | 501.7020795 | 766.9630919 |             |
| 823.9671924 |           |             |             |             |             |
| EPS8L1      | EPS8L1    | 37.48388203 | 22.34300759 | 2.678567259 |             |
| 31.11088942 |           |             |             |             |             |
| NUDCD2      | NUDCD2    | 4508.608186 | 3706.908077 | 2922.31688  |             |
| 3823.811135 |           |             |             |             |             |
| FAM222A     | FAM222A   | 97.22381902 | 79.21611782 | 95.53556557 |             |
| 83.905126   |           |             |             |             |             |
| ZNF587      | ZNF587    | 681.7381044 | 556.5440072 | 1044.641231 |             |
| 991.7774444 |           |             |             |             |             |
| ATOH8       | ATOH8     | 12.88508445 | 2.031182508 | 0           | 4.713771124 |
| TMEM87B     | TMEM87B   | 1658.66178  | 994.2638377 | 1485.711973 |             |
| 1633.793071 |           |             |             |             |             |
| UBALD1      | UBALD1    | 305.7279128 | 157.4166444 | 168.7497373 |             |
| 161.2109724 |           |             |             |             |             |
| ASRGL1      | ASRGL1    | 386.5525334 | 860.2057922 | 389.2851083 |             |
| 275.2842336 |           |             |             |             |             |
| AIFM2       | AIFM2     | 1207.683824 | 1799.627702 | 869.6415035 |             |
| 1061.541257 |           |             |             |             |             |
| CIRH1A      | CIRH1A    | 6943.889146 | 11701.64243 | 7785.702166 |             |
| 7915.364471 |           |             |             |             |             |
| TIPIN       | TIPIN     | 2690.639907 | 2737.01843  | 1517.85478  |             |
| 2011.837516 |           |             |             |             |             |
| TXNL4B      | TXNL4B    | 1581.351273 | 1892.046506 | 1941.068407 |             |
| 2034.463617 |           |             |             |             |             |
| PRPF38B     | PRPF38B   | 3051.422272 | 2210.94216  | 2871.424102 |             |
| 3359.033303 |           |             |             |             |             |
| IARS2       | IARS2     | 8568.581158 | 9258.129872 | 6458.918517 |             |
| 7899.337649 |           |             |             |             |             |
| NKAIN1      | NKAIN1    | 0           | 1.015591254 | 0.892855753 | 0           |

|                 |               |             |               |   |
|-----------------|---------------|-------------|---------------|---|
| SUPT16H SUPT16H | 19057.0399    | 21255.30936 | 16439.26012   |   |
| 17054.42393     |               |             |               |   |
| PPP1R13B        | PPP1R13B      | 398.2662466 | 179.759652    |   |
| 674.1060935     | 418.5828758   |             |               |   |
| TMEM186 TMEM186 | 898.4417974   | 1048.090174 | 969.6413478   |   |
| 1080.396342     |               |             |               |   |
| CNDP1 CNDP1     | 2.342742627   | 1.015591254 | 15.1785478    |   |
| 4.713771124     |               |             |               |   |
| RAPSN RAPSN     | 11.71371313   | 1.015591254 | 19.64282657   |   |
| 9.427542247     |               |             |               |   |
| WNT5B WNT5B     | 1747.686      | 90.38762161 | 0 584.5076193 |   |
| CAMP CAMP       | 0 3.046773762 | 0           | 0             |   |
| SLC41A1 SLC41A1 | 1341.220154   | 1317.221857 | 1804.461477   |   |
| 1604.56769      |               |             |               |   |
| FAM227B FAM227B | 221.3891782   | 149.2919143 | 277.6781392   |   |
| 288.4827928     |               |             |               |   |
| NPAS4 NPAS4     | 2.342742627   | 0 0         | 0             |   |
| LPPR3 LPPR3     | 1.171371313   | 0 0         | 0             |   |
| PLEKHH2 PLEKHH2 | 4.685485254   | 2.031182508 | 75.89273901   |   |
| 40.53843166     |               |             |               |   |
| ZAR1 ZAR1       | 1.171371313   | 0 0         | 0.942754225   |   |
| HERPUD2 HERPUD2 | 2486.821298   | 2492.260937 | 3902.672496   |   |
| 3621.118977     |               |             |               |   |
| CRIM1 CRIM1     | 221.3891782   | 58.90429273 | 33.03566286   |   |
| 80.1341091      |               |             |               |   |
| SIRT7 SIRT7     | 2413.024906   | 2626.318983 | 2993.74534    |   |
| 2641.597338     |               |             |               |   |
| ANKRD20A4       | ANKRD20A4     | 2.342742627 | 10.15591254   |   |
| 8.035701777     | 4.713771124   |             |               |   |
| APLN APLN       | 2.342742627   | 0 0         | 2.828262674   |   |
| COL5A1 COL5A1   | 26.94154021   | 3.046773762 | 0.892855753   |   |
| 0.942754225     |               |             |               |   |
| ZMYND12 ZMYND12 | 19.91331233   | 19.29623383 | 80.35701777   |   |
| 23.56885562     |               |             |               |   |
| TMEM14C TMEM14C | 2875.716575   | 2746.158751 | 2877.674092   |   |
| 3178.967246     |               |             |               |   |
| G6PC3 G6PC3     | 1170.199942   | 1438.077216 | 936.6056849   |   |
| 938.0404536     |               |             |               |   |
| FRG1B FRG1B     | 837.5304891   | 373.7375815 | 595.5347873   |   |
| 1024.773842     |               |             |               |   |
| HOXB-AS3        | HOXB-AS3      | 5.856856567 | 3.046773762   |   |
| 7.142846024     | 9.427542247   |             |               |   |
| PITPNA-AS1      | PITPNA-AS1    | 377.1815629 | 410.2988666   |   |
| 518.7491925     | 396.8995286   |             |               |   |
| DTL DTL         | 9702.468589   | 9359.688997 | 3566.958733   |   |
| 5335.988912     |               |             |               |   |
| CEP170P1        | CEP170P1      | 2.342742627 | 1.015591254   | 0 |
| 1.885508449     |               |             |               |   |
| SLC25A5-AS1     | SLC25A5-AS1   | 4351.64443  | 6622.670568   |   |
| 2857.13841      | 3148.799111   |             |               |   |

|                 |               |  |               |               |
|-----------------|---------------|--|---------------|---------------|
| TSNAX-DISC1     | TSNAX-DISC1   |  | 1482.956083   | 1478.700866   |
| 2149.103798     | 1834.599721   |  |               |               |
| CYP2B7P CYP2B7P | 1.171371313   |  | 1.015591254   | 0 1.885508449 |
| MRPS27 MRPS27   | 4454.725105   |  | 5175.453031   | 4049.993696   |
| 4353.63901      |               |  |               |               |
| FCRLB FCRLB     | 2.342742627   |  | 16.24946006   | 55.35705669   |
| 14.14131337     |               |  |               |               |
| KLHDC8A KLHDC8A | 0 0           |  | 0 6.599279573 |               |
| GRASP GRASP     | 11.71371313   |  | 109.6838554   | 319.6423596   |
| 156.4972013     |               |  |               |               |
| GPR176 GPR176   | 2.342742627   |  | 2.031182508   | 0 3.771016899 |
| PDE1A PDE1A     | 2.342742627   |  | 0 0           | 0             |
| TMEM200B        | TMEM200B      |  | 301.0424276   | 85.30966534   |
| 247.3210436     | 274.3414794   |  |               |               |
| HMGXB4 HMGXB4   | 1440.786716   |  | 1320.26863    | 1156.2482     |
| 1292.516042     |               |  |               |               |
| PRRG4 PRRG4     | 278.7863726   |  | 232.5703972   | 121.4283824   |
| 95.2181767      |               |  |               |               |
| UNC5A UNC5A     | 4.685485254   |  | 3.046773762   | 0 0.942754225 |
| PAQR8 PAQR8     | 912.4982532   |  | 1233.943374   | 2819.638468   |
| 2585.974838     |               |  |               |               |
| TWISTNB TWISTNB | 2642.613683   |  | 2916.778082   | 2766.067123   |
| 2892.369961     |               |  |               |               |
| FAM102B FAM102B | 646.596965    |  | 557.5595985   | 883.0343397   |
| 1235.008034     |               |  |               |               |
| PROX1 PROX1     | 0 7.109138778 |  | 0.892855753   | 0             |
| OR3A2 OR3A2     | 57.39719436   |  | 52.81074521   | 56.24991244   |
| 65.05004151     |               |  |               |               |
| OPCML OPCML     | 2.342742627   |  | 0 0           | 0             |
| LRP6 LRP6       | 65.59679355   |  | 47.73278894   | 122.3212382   |
| 249.8298695     |               |  |               |               |
| KRBOX1 KRBOX1   | 10.54234182   |  | 4.062365016   | 6.249990271   |
| 3.771016899     |               |  |               |               |
| CYBA CYBA       | 18398.72922   |  | 22610.10809   | 7300.881493   |
| 9334.209579     |               |  |               |               |
| TPD52L1 TPD52L1 | 1.171371313   |  | 1.015591254   | 54.46420093   |
| 32.05364364     |               |  |               |               |
| PDZD3 PDZD3     | 0 0           |  | 0 1.885508449 |               |
| CHCHD3 CHCHD3   | 4164.225019   |  | 5073.893905   | 3230.352114   |
| 3800.24228      |               |  |               |               |
| SPACA4 SPACA4   | 0 2.031182508 |  | 0             | 0             |
| ZNF34 ZNF34     | 244.8166045   |  | 337.1762963   | 296.42811     |
| 454.4075363     |               |  |               |               |
| CYB5B CYB5B     | 9584.160087   |  | 10971.43232   | 5684.81258    |
| 6686.955716     |               |  |               |               |
| MAP6 MAP6       | 46.85485254   |  | 24.3741901    | 0 23.56885562 |
| RAI1 RAI1       | 711.0223873   |  | 266.0849086   | 591.0705085   |
| 523.2285947     |               |  |               |               |
| C1orf74 C1orf74 | 212.0182077   |  | 321.9424275   | 283.9281295   |
| 344.105292      |               |  |               |               |



|                    |                    |             |             |             |             |
|--------------------|--------------------|-------------|-------------|-------------|-------------|
| ZNF569             | ZNF569             | 551.7158886 | 536.2321821 | 641.0704307 |             |
| 741.0048206        |                    |             |             |             |             |
| LOC101926935       | LOC101926935       |             | 2.342742627 | 12.18709505 |             |
| 7.142846024        | 18.85508449        |             |             |             |             |
| LINC00087          | LINC00087          |             | 0           | 8.124730032 | 24.99996108 |
|                    | 32.05364364        |             |             |             |             |
| FAM110C            | FAM110C            | 274.1008873 | 54.84192772 | 26.78567259 |             |
| 55.62249926        |                    |             |             |             |             |
| ZMAT1              | ZMAT1              | 32.79839678 | 5.07795627  | 184.8211409 |             |
| 175.3522858        |                    |             |             |             |             |
| ARG1               | ARG1               | 3.51411394  | 0           | 0           | 21.68334717 |
| PPP1R3B            | PPP1R3B            | 470.891268  | 438.7354217 | 838.3915521 |             |
| 896.5592677        |                    |             |             |             |             |
| APOC1              | APOC1              | 5.856856567 | 2.031182508 | 0           | 1.885508449 |
| DHODH              | DHODH              | 801.2179784 | 1235.974556 | 668.748959  |             |
| 867.3338867        |                    |             |             |             |             |
| C6orf147           | C6orf147           |             | 371.3247064 | 332.0983401 |             |
| 107.1426904        | 179.1233027        |             |             |             |             |
| LOC101928940       | LOC101928940       |             | 0           | 0           | 9.821413283 |
| LRTM1              | LRTM1              | 0           | 0           | 0.942754225 | 0           |
| OVCH1              | OVCH1              | 37.48388203 | 2.031182508 | 13.3928363  |             |
| 65.99279573        |                    |             |             |             |             |
| RINL               | RINL               | 3446.174404 | 3783.077421 | 2455.353321 |             |
| 2866.915597        |                    |             |             |             |             |
| SRPK2              | SRPK2              | 2849.946406 | 2566.399099 | 1567.854702 |             |
| 1839.313492        |                    |             |             |             |             |
| PTGER4P2-CDK2AP2P2 | PTGER4P2-CDK2AP2P2 |             |             | 2.342742627 | 0           |
|                    | 0                  | 2.828262674 |             |             |             |
| LINC00598          | LINC00598          |             | 3.51411394  | 4.062365016 |             |
| 28.5713841         | 7.542033798        |             |             |             |             |
| HLCS               | HLCS               | 559.9154878 | 560.6063722 | 789.2844857 |             |
| 670.2982538        |                    |             |             |             |             |
| RABGGTB            | RABGGTB            | 1050.720068 | 884.5799823 | 1330.355072 |             |
| 1357.566084        |                    |             |             |             |             |
| DNLZ               | DNLZ               | 577.4860575 | 1557.916984 | 1318.747947 |             |
| 659.9279573        |                    |             |             |             |             |
| RAB13              | RAB13              | 15.22782708 | 38.59246765 | 58.9284797  |             |
| 47.13771124        |                    |             |             |             |             |
| LRRC9              | LRRC9              | 0           | 0           | 0           | 1.885508449 |
| LOC391322          | LOC391322          |             | 99.56656164 | 57.88870148 |             |
| 85.71415229        | 144.2413964        |             |             |             |             |
| SLC25A39           | SLC25A39           |             | 8203.113308 | 12368.88588 |             |
| 7884.809155        | 7486.411298        |             |             |             |             |
| RPP25L             | RPP25L             | 1106.945891 | 1150.664891 | 1249.998054 |             |
| 1157.702188        |                    |             |             |             |             |
| ALOX15             | ALOX15             | 0           | 2.031182508 | 0           | 0           |
| CEP57              | CEP57              | 4027.174576 | 4252.280581 | 4717.849799 |             |
| 4674.175446        |                    |             |             |             |             |
| PTGIS              | PTGIS              | 534.1453189 | 502.7176708 | 41.96422039 |             |
| 154.6116929        |                    |             |             |             |             |

|             |            |             |             |             |
|-------------|------------|-------------|-------------|-------------|
| TBXA2R      | TBXA2R     | 256.5303176 | 295.5370549 | 54.46420093 |
| 39.59567744 |            |             |             |             |
| ARID1B      | ARID1B     | 3310.295332 | 1407.609478 | 1867.854235 |
| 2680.250261 |            |             |             |             |
| COMMD8      | COMMD8     | 2673.069337 | 2873.107658 | 2331.246371 |
| 2323.889164 |            |             |             |             |
| VPS8        | VPS8       | 3478.972801 | 2746.158751 | 1848.211409 |
| 2609.543694 |            |             |             |             |
| GOLGA8H     | GOLGA8H    | 22.25605496 | 9.140321286 | 12.49998054 |
| 22.62610139 |            |             |             |             |
| USH1G       | USH1G      | 1.171371313 | 0           | 0           |
| PDSS2       | PDSS2      | 1133.887431 | 1281.676163 | 760.7131016 |
| 992.7201986 |            |             |             |             |
| WDR45B      | WDR45B     | 2917.885942 | 3361.607051 | 4417.850266 |
| 3601.321138 |            |             |             |             |
| IRGC        | IRGC       | 0           | 4.464278765 | 0           |
| CPXM1       | CPXM1      | 4.685485254 | 12.18709505 | 0           |
| FOS         | FOS        | 385.3811621 | 440.7666043 | 865.1772247 |
| 571.3090602 |            |             |             |             |
| IL21        | IL21       | 134.707701  | 12.18709505 | 60.71419121 |
| 136.6993626 |            |             |             |             |
| SEPHS2      | SEPHS2     | 11419.69893 | 13940.00555 | 9290.16411  |
| 9322.896528 |            |             |             |             |
| FBX03       | FBX03      | 1601.264586 | 1665.569657 | 2394.63913  |
| 2236.213021 |            |             |             |             |
| TUT1        | TUT1       | 2109.639736 | 3393.09038  | 5221.420444 |
| 2846.175004 |            |             |             |             |
| SMIM10      | SMIM10     | 25.7701689  | 22.34300759 | 12.49998054 |
| 20.74059294 |            |             |             |             |
| ALDH1L2     | ALDH1L2    | 21.08468364 | 25.38978135 | 1.785711506 |
| 37.71016899 |            |             |             |             |
| GCNT4       | GCNT4      | 15.22782708 | 13.2026863  | 36.60708587 |
| 66.93554995 |            |             |             |             |
| TIMMDC1     | TIMMDC1    | 5006.440994 | 5579.65835  | 4948.206583 |
| 4394.177441 |            |             |             |             |
| ATF6        | ATF6       | 3603.13816  | 4167.986507 | 3499.101696 |
| 4095.324352 |            |             |             |             |
| SLC2A9      | SLC2A9     | 16.39919839 | 40.62365016 | 1.785711506 |
| 51.85148236 |            |             |             |             |
| SNORD116-3  | SNORD116-3 | 0           | 2.031182508 | 0           |
| 0.942754225 |            |             |             |             |
| SNORD116-2  | SNORD116-2 | 1.171371313 | 0           | 4.464278765 |
| 0.942754225 |            |             |             |             |
| PRPH2       | PRPH2      | 4.685485254 | 1.015591254 | 1.785711506 |
| 11.3130507  |            |             |             |             |
| PINK1       | PINK1      | 1242.824964 | 1336.51809  | 3980.350947 |
| 2125.910777 |            |             |             |             |
| CP          | CP         | 559.9154878 | 635.760125  | 620.5347484 |
| 728.7490157 |            |             |             |             |
| 8-Mar       | 8-Mar      | 1010.893444 | 646.9316288 | 1807.140044 |

|              |              |             |             |             |             |
|--------------|--------------|-------------|-------------|-------------|-------------|
| 1485.780658  |              |             |             |             |             |
| LYPD3        | LYPD3        | 71.45365012 | 96.48116913 | 567.8562589 |             |
| 352.59008    |              |             |             |             |             |
| CDK13        | CDK13        | 2573.502776 | 2284.06473  | 2923.209735 |             |
| 2733.044497  |              |             |             |             |             |
| TIMM10B      | TIMM10B      | 1945.647752 | 2300.31419  | 3934.815304 |             |
| 3354.319532  |              |             |             |             |             |
| ARHGEF26-AS1 | ARHGEF26-AS1 | 0           | 0           | 9.821413283 | 0           |
| LOC100506801 | LOC100506801 | 151.1068994 |             | 111.7150379 |             |
| 140.1783532  | 98.04643937  |             |             |             |             |
| STX18-AS1    | STX18-AS1    | 77.31050669 |             | 89.37203036 |             |
| 65.17846997  | 111.2449985  |             |             |             |             |
| LINC01426    | LINC01426    | 0           | 3.046773762 | 1.785711506 |             |
| 10.37029647  |              |             |             |             |             |
| LOC100131047 | LOC100131047 | 0           | 0           | 3.571423012 | 0           |
| LOC728084    | LOC728084    | 3.51411394  |             | 39.60805891 |             |
| 6.249990271  | 2.828262674  |             |             |             |             |
| TXNRD3NB     | TXNRD3NB     | 15.22782708 |             | 23.35859884 |             |
| 24.99996108  | 46.19495701  |             |             |             |             |
| MAMDC2       | MAMDC2       | 0           | 0           | 3.571423012 | 1.885508449 |
| MAPKAPK2     | MAPKAPK2     | 884.3853417 |             | 148.2763231 |             |
| 155.356901   | 199.8638956  |             |             |             |             |
| CATSPERB     | CATSPERB     | 14.05645576 |             | 4.062365016 |             |
| 24.10710533  | 24.51160984  |             |             |             |             |
| PLEKH01      | PLEKH01      | 2626.214485 | 4311.184873 | 3073.209502 |             |
| 2077.830311  |              |             |             |             |             |
| WEE1         | WEE1         | 5157.547893 | 5040.379394 | 2300.889276 |             |
| 3571.153003  |              |             |             |             |             |
| XP01         | XP01         | 11159.6545  | 4565.082687 | 5586.598447 |             |
| 7996.441334  |              |             |             |             |             |
| SNORD91B     | SNORD91B     | 1.171371313 |             | 5.07795627  | 0           |
| 0.942754225  |              |             |             |             |             |
| RPL13AP3     | RPL13AP3     | 0           | 0           | 0.892855753 |             |
| 0.942754225  |              |             |             |             |             |
| SNORD91A     | SNORD91A     | 3.51411394  |             | 5.07795627  | 0           |
| 2.828262674  |              |             |             |             |             |
| PMCHL2       | PMCHL2       | 1.171371313 | 1.015591254 | 0           | 1.885508449 |
| GTF2IRD1P1   | GTF2IRD1P1   | 501.3469222 |             | 497.6397145 |             |
| 534.8205961  | 610.9047376  |             |             |             |             |
| SNORD90      | SNORD90      | 1.171371313 | 0           | 0           | 0           |
| SNORA37      | SNORA37      | 3.51411394  | 1.015591254 | 2.678567259 | 0           |
| SNORA36A     | SNORA36A     | 4.685485254 |             | 0           | 11.60712479 |
| 0            |              |             |             |             |             |
| SNORD89      | SNORD89      | 39.82662466 | 32.49892013 | 47.32135491 |             |
| 33.93915209  |              |             |             |             |             |
| SNORD88C     | SNORD88C     | 5.856856567 |             | 2.031182508 |             |
| 12.49998054  | 3.771016899  |             |             |             |             |
| SNORD88B     | SNORD88B     | 69.11090749 |             | 42.65483267 |             |
| 58.9284797   | 33.93915209  |             |             |             |             |
| S100P        | S100P        | 137.0504437 | 441.7821955 | 36.60708587 |             |

|             |             |             |             |               |
|-------------|-------------|-------------|-------------|---------------|
| 32.05364364 |             |             |             |               |
| S100A2      | S100A2      | 25.7701689  | 26.40537261 | 18.74997081   |
| 10.37029647 |             |             |             |               |
| ZNF677      | ZNF677      | 48.02622385 | 58.90429273 | 201.7854002   |
| 165.9247436 |             |             |             |               |
| SLC26A8     | SLC26A8     | 4.685485254 | 6.093547524 | 2.678567259   |
| 15.0840676  |             |             |             |               |
| FAM154A     | FAM154A     | 3.51411394  | 2.031182508 | 57.14276819   |
| 0.942754225 |             |             |             |               |
| TRIM74      | TRIM74      | 15.22782708 | 11.17150379 | 34.82137437   |
| 25.45436407 |             |             |             |               |
| SIAH3       | SIAH3       | 8.199599194 | 12.18709505 | 99.10698859   |
| 54.67974503 |             |             |             |               |
| PHLDB3      | PHLDB3      | 196.7903807 | 332.0983401 | 483.9278181   |
| 230.0320308 |             |             |             |               |
| FUNDC1      | FUNDC1      | 568.115087  | 907.9385811 | 662.4989687   |
| 670.2982538 |             |             |             |               |
| FAM120A0S   | FAM120A0S   |             | 3666.392211 | 4656.4859     |
| 3940.172438 | 4075.526513 |             |             |               |
| APOBEC3A_B  | APOBEC3A_B  |             | 494.3186943 | 575.840241    |
| 272.3210047 | 225.3182597 |             |             |               |
| USP21       | USP21       | 1942.133638 | 2095.164757 | 2599.995953   |
| 2483.214628 |             |             |             |               |
| UCK2        | UCK2        | 4592.94692  | 6020.424954 | 2217.853691   |
| 3028.12657  |             |             |             |               |
| TXN2        | TXN2        | 7649.054677 | 10564.18022 | 5915.169364   |
| 6099.619834 |             |             |             |               |
| GAS2L3      | GAS2L3      | 36.31251072 | 18.28064257 | 11.60712479   |
| 11.3130507  |             |             |             |               |
| ST6GALNAC4  | ST6GALNAC4  |             | 815.2744342 | 869.3461135   |
| 804.4630335 | 915.4143522 |             |             |               |
| TAS2R14     | TAS2R14     | 12.88508445 | 16.24946006 | 5.357134518   |
| 20.74059294 |             |             |             |               |
| FERMT1      | FERMT1      | 9.370970508 | 2.031182508 | 0 9.427542247 |
| BAP1        | BAP1        | 3416.890121 | 1785.409425 | 1922.318436   |
| 1874.195399 |             |             |             |               |
| MLANA       | MLANA       | 8.199599194 | 5.07795627  | 16.07140355   |
| 17.91233027 |             |             |             |               |
| ANAPC4      | ANAPC4      | 3107.648095 | 3344.342    | 2105.353866   |
| 3151.627373 |             |             |             |               |
| ABL1        | ABL1        | 2167.03693  | 1355.814324 | 1311.605101   |
| 1280.260237 |             |             |             |               |
| BAZ2B       | BAZ2B       | 630.1977666 | 595.1364749 | 633.0347289   |
| 807.9403706 |             |             |             |               |
| LRRCC1      | LRRCC1      | 596.2279986 | 427.563918  | 475.8921164   |
| 563.7670264 |             |             |             |               |
| ZNF691      | ZNF691      | 644.2542224 | 548.4192772 | 574.999105    |
| 773.0584643 |             |             |             |               |
| ARHGEF38    | ARHGEF38    |             | 1.171371313 | 1.015591254   |
| 4.464278765 | 4.713771124 |             |             |               |

|              |              |             |             |             |
|--------------|--------------|-------------|-------------|-------------|
| CDKAL1       | CDKAL1       | 3074.849698 | 3724.173129 | 2636.603039 |
| 2919.709834  |              |             |             |             |
| TBC1D22B     | TBC1D22B     |             | 1774.62754  | 1753.926096 |
| 948.2128097  | 947.4679958  |             |             |             |
| GATAD2A      | GATAD2A      | 4754.596161 | 4090.801571 | 3383.030448 |
| 3541.927622  |              |             |             |             |
| IFIH1        | IFIH1        | 3085.39204  | 4411.728408 | 8392.844078 |
| 6522.916481  |              |             |             |             |
| XYLT2        | XYLT2        | 721.5647291 | 972.9364214 | 1283.033717 |
| 549.625713   |              |             |             |             |
| FAM208B      | FAM208B      | 2008.901803 | 1150.664891 | 2241.960796 |
| 2580.318313  |              |             |             |             |
| MOSPD2       | MOSPD2       | 1090.546693 | 834.8160108 | 845.5343981 |
| 1321.741423  |              |             |             |             |
| REG1A        | REG1A        | 0           | 5.07795627  | 3.571423012 |
| 0            | 0            |             |             |             |
| PEPD         | PEPD         | 3562.140164 | 4377.198305 | 5307.134596 |
| 4263.134604  |              |             |             |             |
| CCDC175      | CCDC175      | 58.56856567 | 52.81074521 | 38.39279738 |
| 49.02321969  |              |             |             |             |
| ATP2B1       | ATP2B1       | 1801.56908  | 1606.665364 | 2078.568193 |
| 2949.877969  |              |             |             |             |
| TAF8         | TAF8         | 1733.629544 | 1605.649773 | 1954.461243 |
| 1971.299084  |              |             |             |             |
| IRAK2        | IRAK2        | 1343.562897 | 1727.520723 | 666.9632475 |
| 767.4019389  |              |             |             |             |
| TAF1L        | TAF1L        | 0           | 1.015591254 | 0           |
| 0            | 0            |             |             | 0.942754225 |
| KCNV2        | KCNV2        | 1.171371313 | 9.140321286 | 0           |
| 0            | 0            |             |             | 0           |
| SRFBP1       | SRFBP1       | 741.4780414 | 832.7848283 | 1148.212498 |
| 1126.591299  |              |             |             |             |
| SSTR3        | SSTR3        | 248.3307185 | 121.8709505 | 1486.604829 |
| 747.6041002  |              |             |             |             |
| MB           | MB           | 62.08267961 | 42.65483267 | 195.5354099 |
| 286.5972843  |              |             |             |             |
| FBXL22       | FBXL22       | 39.82662466 | 30.46773762 | 79.46416202 |
| 50.90872813  |              |             |             |             |
| CDIPT        | CDIPT        | 3635.936557 | 4774.294485 | 4967.84941  |
| 3935.056134  |              |             |             |             |
| TASP1        | TASP1        | 646.596965  | 748.4907542 | 840.1772636 |
| 1012.518037  |              |             |             |             |
| LOC100131564 | LOC100131564 |             | 589.1997707 | 397.0961803 |
| 1062.498346  | 956.8955381  |             |             |             |
| SUDS3        | SUDS3        | 2643.785054 | 2428.278688 | 2671.424413 |
| 2701.933608  |              |             |             |             |
| ARMCX1       | ARMCX1       | 14.05645576 | 6.093547524 | 67.85703723 |
| 36.76741476  |              |             |             |             |
| OR1K1        | OR1K1        | 3.51411394  | 0           | 0           |
| 0            | 0            |             |             | 0           |
| MCMBP        | MCMBP        | 13973.2884  | 14271.0883  | 10074.98432 |
| 11123.5571   |              |             |             |             |
| MUC16        | MUC16        | 1.171371313 | 0           | 6.249990271 |
| 0            | 0            |             |             | 0           |
| KIAA0101     | KIAA0101     |             | 7549.488115 | 5821.369068 |

|             |            |             |             |             |             |
|-------------|------------|-------------|-------------|-------------|-------------|
| 1770.532958 |            | 3044.153392 |             |             |             |
| EPHA7       | EPHA7      | 0           | 0           | 0           | 2.828262674 |
| XPOT        | XPOT       | 11548.54978 |             | 11663.04996 | 13891.04981 |
| 11915.47065 |            |             |             |             |             |
| LIN28A      | LIN28A     | 0           | 0           | 1.785711506 | 0           |
| OGFRL1      | OGFRL1     | 540.0021755 |             | 358.5037127 | 333.9280516 |
| 354.4755885 |            |             |             |             |             |
| TNFAIP8L2   | TNFAIP8L2  |             |             | 1772.284797 | 2581.632968 |
| 1131.248239 |            | 1405.646549 |             |             |             |
| NDNF        | NDNF       | 11.71371313 | 0           | 6.249990271 | 5.656525348 |
| HRG         | HRG        | 0           | 5.07795627  | 0           | 0           |
| TEX22       | TEX22      | 26.94154021 |             | 19.29623383 | 43.7499319  |
| 11.3130507  |            |             |             |             |             |
| C19orf81    | C19orf81   |             |             | 1.171371313 | 3.046773762 |
| 1.785711506 |            | 4.713771124 |             |             |             |
| OXLD1       | OXLD1      | 960.524477  |             | 1347.689594 | 1420.533503 |
| 1195.412357 |            |             |             |             |             |
| ANKRD20A5P  | ANKRD20A5P |             |             | 86.6814772  | 43.67042392 |
| 102.6784116 |            | 82.01961755 |             |             |             |
| LOC285762   | LOC285762  |             |             | 8.199599194 | 0           |
| NDRG3       | NDRG3      | 3388.77721  |             | 4354.855297 | 2988.388205 |
| 3777.616178 |            |             |             |             |             |
| ANKS3       | ANKS3      | 335.0121956 |             | 336.1607051 | 565.1776917 |
| 481.7474088 |            |             |             |             |             |
| FBX043      | FBX043     | 261.2158029 |             | 218.3521196 | 46.42849916 |
| 146.1269048 |            |             |             |             |             |
| CCDC160     | CCDC160    | 0           | 1.015591254 | 0           | 0           |
| ADM5        | ADM5       | 48.02622385 |             | 41.63924142 | 67.85703723 |
| 21.68334717 |            |             |             |             |             |
| AN09        | AN09       | 557.5727452 |             | 326.0047926 | 296.42811   |
| 444.0372398 |            |             |             |             |             |
| AIM1L       | AIM1L      | 63.25405093 |             | 50.7795627  | 74.99988325 |
| 90.50440557 |            |             |             |             |             |
| ARSF        | ARSF       | 0           | 0           | 1.785711506 | 0           |
| SPINK4      | SPINK4     | 1.171371313 | 0           | 8.92855753  | 4.713771124 |
| JAZF1       | JAZF1      | 158.1351273 |             | 79.21611782 | 211.6068135 |
| 447.8082567 |            |             |             |             |             |
| ZNF517      | ZNF517     | 55.05445173 |             | 38.59246765 | 124.1069497 |
| 55.62249926 |            |             |             |             |             |
| ADAMTSL5    | ADAMTSL5   |             |             | 78.481878   | 97.49676039 |
| 147.3211993 |            | 186.6653365 |             |             |             |
| LYPD6B      | LYPD6B     | 0           | 0           | 0           | 0.942754225 |
| SIGLEC15    | SIGLEC15   |             |             | 1.171371313 | 0           |
| 28.28262674 |            |             |             |             | 28.5713841  |
| TMED8       | TMED8      | 581.0001715 |             | 611.3859349 | 244.6424763 |
| 327.135716  |            |             |             |             |             |
| PLAT        | PLAT       | 228.4174061 |             | 274.2096386 | 501.7849332 |
| 390.300249  |            |             |             |             |             |
| RPS26       | RPS26      | 12683.60858 |             | 12823.87076 | 10491.0551  |
| 8865.660729 |            |             |             |             |             |

|             |           |             |             |             |
|-------------|-----------|-------------|-------------|-------------|
| RPS25       | RPS25     | 21324.81476 | 20792.19974 | 36394.58621 |
| 30705.5051  |           |             |             |             |
| ABCB1       | ABCB1     | 878.5284851 | 432.6418742 | 1479.461983 |
| 1841.199001 |           |             |             |             |
| FANCD2      | FANCD2    | 5107.178927 | 3756.672049 | 1755.35441  |
| 2746.243057 |           |             |             |             |
| KRT222      | KRT222    | 0           | 3.046773762 | 4.464278765 |
| 1.885508449 |           |             |             |             |
| IGSF3       | IGSF3     | 81.99599194 | 51.79515396 | 49.99992217 |
| 71.64932108 |           |             |             |             |
| KRTAP29-1   | KRTAP29-1 | 0           | 1.015591254 | 7.142846024 |
| 0           |           |             |             |             |
| HCG8        | HCG8      | 4.685485254 | 0           | 1.785711506 |
| 27.33987252 |           |             |             |             |
| BMPR1A      | BMPR1A    | 433.407386  | 451.9381081 | 483.9278181 |
| 596.7634242 |           |             |             |             |
| TRANK1      | TRANK1    | 1529.810935 | 584.9805623 | 3463.387466 |
| 2679.307507 |           |             |             |             |
| ZNF432      | ZNF432    | 194.447638  | 200.071477  | 421.4279154 |
| 503.430756  |           |             |             |             |
| KCNA4       | KCNA4     | 0           | 0           | 0.892855753 |
| 0           |           |             |             |             |
| MZB1        | MZB1      | 919.5264811 | 1400.500339 | 97.32127708 |
| 246.0588527 |           |             |             |             |
| BNIP2       | BNIP2     | 8559.210187 | 9497.809408 | 7701.773726 |
| 7627.824432 |           |             |             |             |
| PRKD3       | PRKD3     | 2766.779042 | 2464.839974 | 3107.138021 |
| 2855.602547 |           |             |             |             |
| GTF2F2      | GTF2F2    | 1206.512453 | 1550.807845 | 1253.569477 |
| 1198.24062  |           |             |             |             |
| SMG5        | SMG5      | 7634.998221 | 6784.149577 | 6809.810828 |
| 6878.334824 |           |             |             |             |
| ALG5        | ALG5      | 2704.696363 | 3338.248452 | 2308.032122 |
| 2115.54048  |           |             |             |             |
| C5orf52     | C5orf52   | 8.199599194 | 5.07795627  | 8.035701777 |
| 9.427542247 |           |             |             |             |
| C1orf50     | C1orf50   | 769.5909529 | 1016.606845 | 1174.998171 |
| 1032.315876 |           |             |             |             |
| WHAMM       | WHAMM     | 378.3529342 | 330.0671576 | 1475.89056  |
| 898.4447762 |           |             |             |             |
| TESPA1      | TESPA1    | 6193.040134 | 7609.825267 | 11053.55422 |
| 9901.747622 |           |             |             |             |
| EVI5L       | EVI5L     | 241.3024906 | 177.7284695 | 354.463734  |
| 213.0624548 |           |             |             |             |
| PARG        | PARG      | 1504.040766 | 1567.057305 | 1249.998054 |
| 1441.47121  |           |             |             |             |
| RHOA        | RHOA      | 39149.57204 | 42104.38221 | 29432.09704 |
| 31209.87861 |           |             |             |             |
| GSTT1       | GSTT1     | 169.8488405 | 185.8531995 | 273.2138604 |
| 389.3574948 |           |             |             |             |
| AKIP1       | AKIP1     | 1160.828972 | 2184.536787 | 1720.533036 |
| 1280.260237 |           |             |             |             |
| NOM01       | NOM01     | 3268.125965 | 5783.792192 | 3386.601871 |

|                |                |             |             |             |
|----------------|----------------|-------------|-------------|-------------|
| 2684.021278    |                |             |             |             |
| GUSB           | GUSB           | 4793.251415 | 6290.572228 | 3798.208373 |
| 3954.853973    |                |             |             |             |
| NDN            | NDN            | 277.6150013 | 166.5569657 | 28.5713841  |
| 138.584871     |                |             |             |             |
| NGFR           | NGFR           | 0           | 58.9284797  | 0           |
| ZNF580         | ZNF580         | 920.6978524 | 973.9520126 | 454.4635783 |
| 510.9727898    |                |             |             |             |
| DPM3           | DPM3           | 499.0041795 | 437.7198305 | 354.463734  |
| 331.8494871    |                |             |             |             |
| BCAP29         | BCAP29         | 1670.375493 | 1982.434128 | 1460.712012 |
| 1246.321085    |                |             |             |             |
| SNTG2          | SNTG2          | 2.342742627 | 3.046773762 | 13.3928363  |
| 8.484788022    |                |             |             |             |
| ZNF664-FAM101A | ZNF664-FAM101A | 50.36896648 |             | 83.27848283 |
| 78.57130627    | 71.64932108    |             |             |             |
| ASIC3          | ASIC3          | 2.342742627 | 0           | 12.49998054 |
| 10.37029647    |                |             |             |             |
| DCP2           | DCP2           | 5972.822327 | 2764.439394 | 2577.674559 |
| 3189.337542    |                |             |             |             |
| RILPL1         | RILPL1         | 125.3367305 | 191.946747  | 208.9282462 |
| 152.7261844    |                |             |             |             |
| GGTLC1         | GGTLC1         | 0           | 2.031182508 | 0           |
| KIF14          | KIF14          | 3292.724762 | 2769.51735  | 575.8919607 |
| 1138.847103    |                |             |             |             |
| GJA8           | GJA8           | 0           | 0.892855753 | 0           |
| RAB3A          | RAB3A          | 52.71170911 | 34.53010264 | 28.5713841  |
| 41.48118589    |                |             |             |             |
| RAB2A          | RAB2A          | 4372.729113 | 4658.517082 | 5238.384703 |
| 5203.060566    |                |             |             |             |
| FBX022         | FBX022         | 2905.000857 | 3848.075262 | 3490.173139 |
| 2427.592129    |                |             |             |             |
| TEN1-CDK3      | TEN1-CDK3      |             | 794.1897505 | 1142.540161 |
| 705.3560449    | 483.6329173    |             |             |             |
| MAP1A          | MAP1A          | 336.183567  | 1435.030442 | 128.5712284 |
| 102.7602105    |                |             |             |             |
| TRIM16         | TRIM16         | 1875.365473 | 1424.874529 | 249.9996108 |
| 520.400332     |                |             |             |             |
| ZNF337         | ZNF337         | 901.9559114 | 980.0455602 | 1733.925872 |
| 1466.925574    |                |             |             |             |
| KIAA1671       | KIAA1671       |             | 1112.802748 | 673.3370014 |
| 548.2134324    | 443.0944856    |             |             |             |
| C14orf80       | C14orf80       |             | 2042.871571 | 2794.907131 |
| 1472.319137    | 1404.703795    |             |             |             |
| NAT1           | NAT1           | 845.7300883 | 858.1746097 | 627.6775944 |
| 661.8134658    |                |             |             |             |
| ARRDC3         | ARRDC3         | 1031.978127 | 992.2326552 | 17201.75894 |
| 6708.639063    |                |             |             |             |
| RIMBP3         | RIMBP3         | 72.62502143 | 64.99784026 | 153.5711895 |
| 132.9283457    |                |             |             |             |
| PCDHB5         | PCDHB5         | 0           | 66.96418148 | 0           |



|              |              |             |             |             |
|--------------|--------------|-------------|-------------|-------------|
| HIPK2        | HIPK2        | 828.1595186 | 413.3456404 | 782.1416397 |
| 1304.771847  |              |             |             |             |
| TNNI3K       | TNNI3K       | 21.08468364 | 23.35859884 | 33.03566286 |
| 32.05364364  |              |             |             |             |
| UTP23        | UTP23        | 1171.371313 | 1215.662731 | 1852.675688 |
| 1518.777056  |              |             |             |             |
| C9orf156     | C9orf156     |             | 1286.165702 | 1781.34706  |
| 1369.640725  |              | 1345.310279 |             |             |
| LOC100130705 | LOC100130705 |             | 5.856856567 | 1.015591254 |
| 8.035701777  |              | 8.484788022 |             |             |
| RPTOR        | RPTOR        | 3385.263096 | 1894.077689 | 904.4628778 |
| 990.8346902  |              |             |             |             |
| FMOD         | FMOD         | 4.685485254 | 29.45214637 | 2.678567259 |
| 47.13771124  |              |             |             |             |
| DDB1         | DDB1         | 23776.49492 | 25280.0975  | 17248.18744 |
| 17665.32866  |              |             |             |             |
| OSBPL1A      | OSBPL1A      | 144.0786716 | 19.29623383 | 85.71415229 |
| 214.005209   |              |             |             |             |
| MAML1        | MAML1        | 2259.575264 | 1268.473476 | 1758.032978 |
| 1823.286671  |              |             |             |             |
| SPCS2        | SPCS2        | 6109.872771 | 7846.458029 | 6431.239989 |
| 6647.360038  |              |             |             |             |
| ZNRF2P1      | ZNRF2P1      | 46.85485254 | 8.124730032 | 16.96425931 |
| 76.3630922   |              |             |             |             |
| FAM171A1     | FAM171A1     |             | 208.5040938 | 641.8536726 |
| 1104.462567  |              | 410.0980878 |             |             |
| PTPMT1       | PTPMT1       | 4843.620381 | 6329.164695 | 3998.208062 |
| 4156.603377  |              |             |             |             |
| KIF18B       | KIF18B       | 3174.416259 | 2083.993253 | 835.7129848 |
| 1079.453587  |              |             |             |             |
| NAB1         | NAB1         | 1201.826968 | 518.9671308 | 610.7133351 |
| 958.7810465  |              |             |             |             |
| CDR2L        | CDR2L        | 39.82662466 | 23.35859884 | 15.1785478  |
| 18.85508449  |              |             |             |             |
| ROB01        | ROB01        | 19.91331233 | 9.140321286 | 17.85711506 |
| 31.11088942  |              |             |             |             |
| MIPEP        | MIPEP        | 1012.064815 | 1503.075056 | 1329.462216 |
| 900.3302846  |              |             |             |             |
| SLC5A2       | SLC5A2       | 454.4920696 | 477.3278894 | 769.6416591 |
| 779.6577438  |              |             |             |             |
| CCDC125      | CCDC125      | 621.9981674 | 309.7553325 | 421.4279154 |
| 360.1321138  |              |             |             |             |
| ZDHHC17      | ZDHHC17      | 1684.431949 | 980.0455602 | 1318.747947 |
| 1795.004044  |              |             |             |             |
| PCDHGB5      | PCDHGB5      | 8.199599194 | 22.34300759 | 41.07136464 |
| 57.50800771  |              |             |             |             |
| RBM20        | RBM20        | 7.028227881 | 0           | 33.03566286 |
| ZNF584       | ZNF584       | 545.8590321 | 700.7579653 | 778.5702166 |
| 1021.002825  |              |             |             | 8.484788022 |
| TSTD2        | TSTD2        | 1485.298825 | 1507.137421 | 2199.10372  |

|              |              |             |             |             |             |
|--------------|--------------|-------------|-------------|-------------|-------------|
| 2033.520863  |              |             |             |             |             |
| LRRC70       | LRRC70       | 33.96976809 | 52.81074521 | 29.46423985 |             |
| 7.542033798  |              |             |             |             |             |
| ENKUR        | ENKUR        | 1.171371313 | 0           | 41.96422039 | 3.771016899 |
| RAC2         | RAC2         | 40714.52411 | 52155.68885 | 17341.93729 |             |
| 25895.57304  |              |             |             |             |             |
| VPS33A       | VPS33A       | 4567.176751 | 5290.214842 | 3842.851161 |             |
| 4739.225488  |              |             |             |             |             |
| BTG4         | BTG4         | 1.171371313 | 5.07795627  | 0           | 0           |
| ZC3H7B       | ZC3H7B       | 516.5747492 | 271.1628648 | 444.642165  |             |
| 397.8422828  |              |             |             |             |             |
| RNF144B      | RNF144B      | 71.45365012 | 54.84192772 | 167.8568816 |             |
| 160.2682182  |              |             |             |             |             |
| MFSD12       | MFSD12       | 2866.345604 | 3506.8366   | 3249.994941 |             |
| 2583.146576  |              |             |             |             |             |
| LINC00672    | LINC00672    |             | 52.71170911 | 29.45214637 |             |
| 36.60708587  | 24.51160984  |             |             |             |             |
| LOC101929743 | LOC101929743 |             | 1.171371313 | 0           | 0           |
| MAPK8IP2     | MAPK8IP2     |             | 1.171371313 | 6.093547524 | 0           |
| 2.678567259  | 3.771016899  |             |             |             |             |
| ZNF75D       | ZNF75D       | 1051.891439 | 755.599893  | 1959.818378 |             |
| 1478.238624  |              |             |             |             |             |
| MED1         | MED1         | 3674.59181  | 2524.759858 | 3001.781042 |             |
| 3480.648598  |              |             |             |             |             |
| PTPN21       | PTPN21       | 1.171371313 | 5.07795627  | 0           | 1.885508449 |
| ZBTB11       | ZBTB11       | 2762.093557 | 2278.986774 | 3830.351181 |             |
| 3386.373175  |              |             |             |             |             |
| CERS4        | CERS4        | 516.5747492 | 524.0450871 | 463.3921358 |             |
| 501.5452475  |              |             |             |             |             |
| SUV420H1     | SUV420H1     |             | 2507.905982 | 2316.56365  |             |
| 2897.316919  | 2597.287889  |             |             |             |             |
| ABRA         | ABRA         | 1.171371313 | 0           | 1.785711506 | 3.771016899 |
| ICE2         | ICE2         | 3894.809617 | 3969.946212 | 3245.530662 |             |
| 3937.884397  |              |             |             |             |             |
| SPATS2       | SPATS2       | 645.4255937 | 599.1988399 | 266.9638702 |             |
| 450.6365194  |              |             |             |             |             |
| ANAPC1       | ANAPC1       | 8341.335123 | 6600.32756  | 5495.52716  |             |
| 5126.697474  |              |             |             |             |             |
| LMNTD2       | LMNTD2       | 51.54033779 | 59.91988399 | 112.4998249 |             |
| 75.42033798  |              |             |             |             |             |
| AIP          | AIP          | 8731.401771 | 12257.17085 | 6954.45346  |             |
| 7773.951337  |              |             |             |             |             |
| CRYBB3       | CRYBB3       | 0           | 3.046773762 | 0           | 0           |
| CRY1         | CRY1         | 2281.831319 | 2465.855565 | 3888.386804 |             |
| 3121.459238  |              |             |             |             |             |
| LIPG         | LIPG         | 1.171371313 | 0           | 0           | 23.56885562 |
| AKR1B1       | AKR1B1       | 9977.740848 | 12530.36489 | 6100.88336  |             |
| 6680.356436  |              |             |             |             |             |
| RABAC1       | RABAC1       | 1987.817119 | 2786.782401 | 3711.601365 |             |
| 2590.68861   |              |             |             |             |             |

|               |               |             |             |             |             |
|---------------|---------------|-------------|-------------|-------------|-------------|
| WBP1          | WBP1          | 1520.439965 | 1527.449246 | 1199.998132 |             |
| 944.6397332   |               |             |             |             |             |
| RCC2          | RCC2          | 13373.54629 | 7105.076413 | 4699.992684 |             |
| 6193.895256   |               |             |             |             |             |
| FSD1L         | FSD1L         | 217.8750643 | 200.071477  | 101.7855558 |             |
| 147.0696591   |               |             |             |             |             |
| TIMP2         | TIMP2         | 9.370970508 | 4.062365016 | 0.892855753 |             |
| 9.427542247   |               |             |             |             |             |
| NPRL2         | NPRL2         | 2636.756827 | 3432.698439 | 4276.779057 |             |
| 3602.263893   |               |             |             |             |             |
| HSPD1         | HSPD1         | 29072.26463 | 34822.59292 | 27372.27882 |             |
| 30483.0151    |               |             |             |             |             |
| STX2          | STX2          | 1067.119267 | 1200.428862 | 822.3201485 |             |
| 1148.274646   |               |             |             |             |             |
| DNAJC25-GNG10 | DNAJC25-GNG10 | 1109.819701 | 1904.649756 | 2350.078162 |             |
| 1420.730617   |               |             |             |             |             |
| UCHL1         | UCHL1         | 44.51210991 | 67.02902277 | 57.14276819 | 0           |
| TPH1          | TPH1          | 0           | 4.062365016 | 0           | 4.713771124 |
| CHERP         | CHERP         | 3651.164384 | 2714.675422 | 3174.995058 |             |
| 2845.23225    |               |             |             |             |             |
| RGS9BP        | RGS9BP        | 3.51411394  | 0           | 19.64282657 | 3.771016899 |
| UBE2M         | UBE2M         | 3307.952589 | 1969.231442 | 1379.462138 |             |
| 1410.36032    |               |             |             |             |             |
| KCNC3         | KCNC3         | 2.342742627 | 0           | 1.785711506 | 6.599279573 |
| CNTN2         | CNTN2         | 1.171371313 | 2.031182508 | 0           | 3.771016899 |
| SELE          | SELE          | 2.342742627 | 2.031182508 | 10.71426904 | 0           |
| LOC100130872  | LOC100130872  | 139.2854975 | 215.5323217 | 142.1827756 |             |
| 200.8066499   |               |             |             |             |             |
| ZGRF1         | ZGRF1         | 1851.938047 | 937.3907275 | 795.5344759 |             |
| 1114.335494   |               |             |             |             |             |
| SCN3B         | SCN3B         | 4.685485254 | 3.046773762 | 6.249990271 |             |
| 0.942754225   |               |             |             |             |             |
| SOX18         | SOX18         | 5.856856567 | 76.16934405 | 15.1785478  |             |
| 12.25580492   |               |             |             |             |             |
| PIGZ          | PIGZ          | 40.99799597 | 41.63924142 | 0           | 4.713771124 |
| PARM1         | PARM1         | 0           | 0           | 33.93915209 |             |
| NPDC1         | NPDC1         | 1014.407557 | 739.3504329 | 456.2492898 |             |
| 616.561263    |               |             |             |             |             |
| CD1C          | CD1C          | 26.94154021 | 3.046773762 | 0           | 13.19855915 |
| CSNK1E        | CSNK1E        | 1586.036758 | 1603.61859  | 1191.96243  |             |
| 1249.149348   |               |             |             |             |             |
| CTNNA1        | CTNNA1        | 3081.877926 | 4219.781661 | 2721.424335 |             |
| 2976.275087   |               |             |             |             |             |
| SLC25A15      | SLC25A15      | 1263.390891 | 1103.431777 | 1291.832075 |             |
| 1153.931171   |               |             |             |             |             |
| LTK           | LTK           | 501.3469222 | 52.81074521 | 2.678567259 |             |
| 72.5920753    |               |             |             |             |             |
| PTS           | PTS           | 1051.891439 | 1035.903079 | 684.8203626 |             |
| 708.0084228   |               |             |             |             |             |
| MY09A         | MY09A         | 927.7260803 | 577.8714236 | 1145.533931 |             |

|             |          |             |             |             |
|-------------|----------|-------------|-------------|-------------|
| 1198.24062  |          |             |             |             |
| CD160       | CD160    | 22.25605496 | 19.29623383 | 146.4283435 |
| 51.85148236 |          |             |             |             |
| HOXB3       | HOXB3    | 24.59879758 | 7.109138778 | 11.60712479 |
| 46.19495701 |          |             |             |             |
| EFNA5       | EFNA5    | 4.685485254 | 0           | 0           |
| GCLM        | GCLM     | 2329.857542 | 3221.455458 | 3.771016899 |
| 2245.640563 |          |             |             | 3124.10228  |
| FH          | FH       | 4739.368334 | 5914.803464 | 2856.245554 |
| 3464.621776 |          |             |             |             |
| EEF1G       | EEF1G    | 18402.24333 | 26609.50645 | 24671.39017 |
| 21557.96086 |          |             |             |             |
| PRR19       | PRR19    | 682.9094757 | 958.7181438 | 526.7848943 |
| 646.7293982 |          |             |             |             |
| FAM179A     | FAM179A  | 345.5545375 | 485.4526194 | 103.5712674 |
| 99.93194782 |          |             |             |             |
| TXNDC12     | TXNDC12  | 6961.459716 | 9195.163214 | 7908.91626  |
| 6966.010966 |          |             |             |             |
| MIR4657     | MIR4657  | 30.45565415 | 22.34300759 | 9.821413283 |
| 28.28262674 |          |             |             |             |
| MIR4648     | MIR4648  | 0           | 1.015591254 | 0           |
| MIR4656     | MIR4656  | 1.171371313 | 1.015591254 | 0           |
| MIR4647     | MIR4647  | 425.2077868 | 516.9359483 | 0.942754225 |
| 280.940759  |          |             |             | 245.5353321 |
| MIR4644     | MIR4644  | 4.685485254 | 7.109138778 | 3.571423012 |
| 1.885508449 |          |             |             |             |
| OCEL1       | OCEL1    | 544.6876608 | 398.1117716 | 557.1419899 |
| 564.7097806 |          |             |             |             |
| CCDC30      | CCDC30   | 4.685485254 | 14.21827756 | 53.57134518 |
| 44.30944856 |          |             |             |             |
| CYP2C18     | CYP2C18  | 21.08468364 | 3.046773762 | 0           |
| SNCB        | SNCB     | 2.342742627 | 1.015591254 | 0           |
| CCL5        | CCL5     | 5269.999539 | 2411.013637 | 3.771016899 |
| 8040.750783 |          |             |             | 0.942754225 |
| CCL4        | CCL4     | 3468.430459 | 1346.674003 | 3690.172827 |
| 11300.79489 |          |             |             |             |
| KLRB1       | KLRB1    | 414.665445  | 269.1316823 | 11385.69656 |
| 670.2982538 |          |             |             |             |
| C19orf44    | C19orf44 |             | 1275.62336  | 995.279429  |
| 1274.998015 |          | 1108.678968 |             |             |
| NLRC5       | NLRC5    | 10695.79146 | 7808.881152 | 13608.01453 |
| 11836.27929 |          |             |             |             |
| GRK7        | GRK7     | 2.342742627 | 0           | 22.32139383 |
| SYDE2       | SYDE2    | 24.59879758 | 32.49892013 | 0           |
| 225.3182597 |          |             |             | 378.5708393 |
| BBS2        | BBS2     | 832.8450039 | 727.1633379 | 2652.674442 |
| 2694.391574 |          |             |             |             |
| EMILIN2     | EMILIN2  | 311.5847694 | 671.3058189 | 572.3205377 |
| 324.3074533 |          |             |             |             |
| STK11IP     | STK11IP  | 1933.934039 | 1999.699179 | 1683.033094 |

|             |          |             |             |             |             |
|-------------|----------|-------------|-------------|-------------|-------------|
| 1543.288666 |          |             |             |             |             |
| DPY19L2     | DPY19L2  | 10.54234182 | 5.07795627  | 9.821413283 |             |
| 4.713771124 |          |             |             |             |             |
| DIP2C       | DIP2C    | 32.79839678 | 21.32741634 | 158.0354683 |             |
| 162.1537267 |          |             |             |             |             |
| ZNF296      | ZNF296   | 216.703693  | 368.6596252 | 288.3924082 |             |
| 130.100083  |          |             |             |             |             |
| SLC2A3      | SLC2A3   | 11418.52756 | 11585.86503 | 11192.83972 |             |
| 11606.24726 |          |             |             |             |             |
| NAA50       | NAA50    | 11231.10815 | 11501.57095 | 8743.736389 |             |
| 10238.31088 |          |             |             |             |             |
| LYAR        | LYAR     | 2367.341425 | 2661.864677 | 2169.63948  |             |
| 2410.622553 |          |             |             |             |             |
| MKRN2       | MKRN2    | 3763.61603  | 5265.840652 | 5624.098388 |             |
| 4721.313157 |          |             |             |             |             |
| LAMP3       | LAMP3    | 1205.341082 | 1362.923463 | 5670.526887 |             |
| 4801.447266 |          |             |             |             |             |
| BRPF3       | BRPF3    | 844.558717  | 516.9359483 | 1392.854975 |             |
| 1183.156552 |          |             |             |             |             |
| SGIP1       | SGIP1    | 12.88508445 | 2.031182508 | 0           | 10.37029647 |
| SV2C        | SV2C     | 7.028227881 | 6.093547524 | 14.28569205 | 0           |
| UBA3        | UBA3     | 9424.853588 | 10415.9039  | 6467.847075 |             |
| 7421.361257 |          |             |             |             |             |
| RTCB        | RTCB     | 10323.29539 | 15531.43705 | 9709.806314 |             |
| 9513.332882 |          |             |             |             |             |
| TSTD3       | TSTD3    | 135.8790724 | 92.41880412 | 35.71423012 |             |
| 103.7029647 |          |             |             |             |             |
| MAPK8IP3    | MAPK8IP3 |             | 885.556713  | 323.97361   |             |
| 801.7844662 |          | 653.3286777 |             |             |             |
| EMC2        | EMC2     | 1489.984311 | 1645.257832 | 1801.78291  |             |
| 1800.660569 |          |             |             |             |             |
| BMPR2       | BMPR2    | 610.2844543 | 422.4859617 | 839.2844078 |             |
| 742.8903291 |          |             |             |             |             |
| MAPK12      | MAPK12   | 182.7339249 | 119.839768  | 13.3928363  |             |
| 15.0840676  |          |             |             |             |             |
| KLF9        | KLF9     | 124.1653592 | 64.99784026 | 174.1068718 |             |
| 192.3218618 |          |             |             |             |             |
| UCN         | UCN      | 24.59879758 | 6.093547524 | 8.035701777 |             |
| 22.62610139 |          |             |             |             |             |
| TOP2B       | TOP2B    | 14349.29859 | 8951.421313 | 9758.913381 |             |
| 11357.36015 |          |             |             |             |             |
| TIGD1       | TIGD1    | 544.6876608 | 351.3945739 | 887.4986185 |             |
| 666.5272369 |          |             |             |             |             |
| BACH2       | BACH2    | 905.4700253 | 717.0074254 | 3362.494766 |             |
| 3237.418008 |          |             |             |             |             |
| B9D1        | B9D1     | 91.36696245 | 90.38762161 | 58.9284797  |             |
| 61.27902461 |          |             |             |             |             |
| MIR3176     | MIR3176  | 4.685485254 | 0           | 0           | 0           |
| MIR3175     | MIR3175  | 3.51411394  | 1.015591254 | 1.785711506 |             |
| 11.3130507  |          |             |             |             |             |

|             |             |             |   |             |             |             |   |
|-------------|-------------|-------------|---|-------------|-------------|-------------|---|
| MIR3173     | MIR3173     | 0           | 0 | 0           | 0.942754225 |             |   |
| MIR1260B    | MIR1260B    |             |   | 14.05645576 |             | 7.109138778 |   |
| 43.7499319  | 41.48118589 |             |   |             |             |             |   |
| MIR3162     | MIR3162     | 0           | 0 | 0.892855753 |             | 0           |   |
| MIR3160-2   | MIR3160-2   |             |   | 1.171371313 |             | 0           | 0 |
| MIR3160-1   | MIR3160-1   |             |   | 1.171371313 |             | 0           | 0 |
| SLC2A6      | SLC2A6      | 64.42542224 |   | 135.0736368 |             | 356.2494455 |   |
| 183.8370738 |             |             |   |             |             |             |   |
| RPL27       | RPL27       | 10503.68657 |   | 10914.55921 |             | 9941.055954 |   |
| 9612.322075 |             |             |   |             |             |             |   |
| C10orf105   | C10orf105   |             |   | 16.39919839 |             | 18.28064257 |   |
| 50.89277792 | 12.25580492 |             |   |             |             |             |   |
| ADRB2       | ADRB2       | 103.0806756 |   | 43.67042392 |             | 314.2852251 |   |
| 195.1501245 |             |             |   |             |             |             |   |
| IMPACT      | IMPACT      | 1103.431777 |   | 737.3192504 |             | 761.6059573 |   |
| 1227.466001 |             |             |   |             |             |             |   |
| FBX06       | FBX06       | 1645.776695 |   | 3539.33552  |             | 3071.42379  |   |
| 2410.622553 |             |             |   |             |             |             |   |
| ZBTB43      | ZBTB43      | 1123.34509  |   | 1147.618117 |             | 1583.03325  |   |
| 1556.487225 |             |             |   |             |             |             |   |
| AMIG01      | AMIG01      | 80.82462063 |   | 24.3741901  |             | 728.5702945 |   |
| 757.0316424 |             |             |   |             |             |             |   |
| APMAP       | APMAP       | 5118.89264  |   | 6158.545365 |             | 6680.346744 |   |
| 5961.034963 |             |             |   |             |             |             |   |
| SMA4        | SMA4        | 132.3649584 |   | 101.5591254 |             | 162.4997471 |   |
| 145.1841506 |             |             |   |             |             |             |   |
| TREML5P     | TREML5P     | 0           | 0 | 8.035701777 |             | 0           |   |
| FLJ25758    | FLJ25758    |             |   | 2.342742627 |             | 0           | 0 |
| INPP5A      | INPP5A      | 235.445634  |   | 362.5660777 |             | 464.2849916 |   |
| 431.7814349 |             |             |   |             |             |             |   |
| OPA1-AS1    | OPA1-AS1    |             |   | 428.7219007 |             | 516.9359483 |   |
| 341.0708977 | 370.5024103 |             |   |             |             |             |   |
| S100Z       | S100Z       | 32.79839678 |   | 45.70160643 |             | 0.892855753 |   |
| 22.62610139 |             |             |   |             |             |             |   |
| ORMDL3      | ORMDL3      | 7192.219865 |   | 3966.899438 |             | 4283.029047 |   |
| 4467.712271 |             |             |   |             |             |             |   |
| TMEM14A     | TMEM14A     | 1111.631376 |   | 1381.204106 |             | 891.9628973 |   |
| 1148.274646 |             |             |   |             |             |             |   |
| RELT        | RELT        | 1033.149498 |   | 1228.865417 |             | 995.5341646 |   |
| 887.1317255 |             |             |   |             |             |             |   |
| MICALCL     | MICALCL     | 11.71371313 |   | 2.031182508 |             | 8.92855753  |   |
| 15.0840676  |             |             |   |             |             |             |   |
| BOD1L1      | BOD1L1      | 1694.974291 |   | 1731.583088 |             | 3123.209424 |   |
| 2564.291491 |             |             |   |             |             |             |   |
| FAM65C      | FAM65C      | 37.48388203 |   | 44.68601518 |             | 81.24987353 |   |
| 83.905126   |             |             |   |             |             |             |   |
| ATP2C2      | ATP2C2      | 25.7701689  |   | 20.31182508 |             | 5.357134518 |   |
| 7.542033798 |             |             |   |             |             |             |   |
| CCDC91      | CCDC91      | 1184.256398 |   | 1198.39768  |             | 1696.425931 |   |
| 1523.490827 |             |             |   |             |             |             |   |

|             |           |             |             |             |             |
|-------------|-----------|-------------|-------------|-------------|-------------|
| RAET1E      | RAET1E    | 5.856856567 | 0           | 2.678567259 | 0           |
| EXOSC8      | EXOSC8    | 5839.285998 | 5795.979287 | 4069.636522 |             |
| 4921.177053 |           |             |             |             |             |
| TMEM80      | TMEM80    | 566.9437157 | 732.2412942 | 695.5346316 |             |
| 814.5396502 |           |             |             |             |             |
| NAP1L2      | NAP1L2    | 35.1411394  | 24.3741901  | 180.3568621 |             |
| 143.2986422 |           |             |             |             |             |
| MAFA        | MAFA      | 1.171371313 | 0           | 0           | 3.771016899 |
| LINC00235   | LINC00235 |             | 1.171371313 | 3.046773762 |             |
| 2.678567259 |           | 3.771016899 |             |             |             |
| CD58        | CD58      | 4353.987172 | 4220.797252 | 1440.17633  |             |
| 2462.474035 |           |             |             |             |             |
| EMG1        | EMG1      | 3562.140164 | 4351.808524 | 4618.74281  |             |
| 4230.138206 |           |             |             |             |             |
| RNFT2       | RNFT2     | 121.8226166 | 179.759652  | 100.8927001 |             |
| 64.10728728 |           |             |             |             |             |
| NFS1        | NFS1      | 2636.756827 | 2727.878108 | 1650.890287 |             |
| 1998.638956 |           |             |             |             |             |
| ASS1        | ASS1      | 9.370970508 | 11.17150379 | 12.49998054 |             |
| 35.82466054 |           |             |             |             |             |
| ITFG1       | ITFG1     | 2889.77303  | 3091.459777 | 2583.031694 |             |
| 2489.813907 |           |             |             |             |             |
| THOC3       | THOC3     | 1668.03275  | 5346.072361 | 3195.53074  |             |
| 1738.43879  |           |             |             |             |             |
| PPP1R35     | PPP1R35   | 1938.619524 | 2231.253985 | 1551.783299 |             |
| 1700.728621 |           |             |             |             |             |
| SLC35D3     | SLC35D3   | 0           | 21.32741634 | 22.32139383 | 0           |
| RFFL        | RFFL      | 5617.896819 | 2646.630808 | 3568.744445 |             |
| 4297.073756 |           |             |             |             |             |
| SRP14-AS1   | SRP14-AS1 |             | 327.9839678 | 401.1585454 |             |
| 611.6061908 |           | 276.2269878 |             |             |             |
| N4BP2       | N4BP2     | 3050.2509   | 1796.580928 | 1342.855053 |             |
| 1961.871542 |           |             |             |             |             |
| BOK         | BOK       | 2.342742627 | 2.031182508 | 3.571423012 |             |
| 6.599279573 |           |             |             |             |             |
| MAP1LC3A    | MAP1LC3A  |             | 713.3651299 | 375.768764  |             |
| 156.2497568 |           | 252.6581322 |             |             |             |
| KDM4B       | KDM4B     | 2033.5006   | 1674.709978 | 1158.033912 |             |
| 1803.488832 |           |             |             |             |             |
| EMC6        | EMC6      | 2722.266932 | 3198.096859 | 2216.960835 |             |
| 2299.377554 |           |             |             |             |             |
| RNF208      | RNF208    | 3.51411394  | 1.015591254 | 0           | 4.713771124 |
| STEAP4      | STEAP4    | 0           | 19.64282657 | 0           |             |
| PCBD1       | PCBD1     | 1097.574921 | 1095.822963 | 599.1062103 |             |
| 727.8062615 |           |             |             |             |             |
| EBNA1BP2    | EBNA1BP2  |             | 5477.332262 | 8459.875146 |             |
| 5766.955309 |           | 5742.315983 |             |             |             |
| TDRD1       | TDRD1     | 36.31251072 | 0           | 8.92855753  | 84.84788022 |
| ATG10       | ATG10     | 550.5445173 | 476.3122981 | 275.8924277 |             |
| 432.7241891 |           |             |             |             |             |

|              |              |             |             |             |   |
|--------------|--------------|-------------|-------------|-------------|---|
| GOLGA4       | GOLGA4       | 2692.98265  | 2586.710924 | 4223.207712 |   |
| 3245.902796  |              |             |             |             |   |
| TTBK2        | TTBK2        | 548.2017747 | 379.831129  | 697.3203431 |   |
| 655.2141862  |              |             |             |             |   |
| PTER         | PTER         | 1404.474205 | 1705.177716 | 1786.604362 |   |
| 1781.805485  |              |             |             |             |   |
| SRXN1        | SRXN1        | 2853.46052  | 6569.859822 | 4786.599692 |   |
| 2193.789081  |              |             |             |             |   |
| ADAMTS14     | ADAMTS14     |             | 4.685485254 | 0           | 0 |
| 0            | 0            |             |             |             |   |
| OCSTAMP      | OCSTAMP      | 0           | 67.85703723 | 14.14131337 |   |
| EEF1DP3      | EEF1DP3      | 18.74194102 | 15.23386881 | 1.785711506 |   |
| 7.542033798  |              |             |             |             |   |
| LINC00319    | LINC00319    |             | 0           | 0.892855753 | 0 |
| 0            | 0            |             |             |             |   |
| LOC441666    | LOC441666    |             | 11.71371313 | 28.43655511 |   |
| 19.64282657  | 31.11088942  |             |             |             |   |
| LOC400794    | LOC400794    |             | 0           | 3.571423012 | 0 |
| 0            | 0            |             |             |             |   |
| CECR3        | CECR3        | 1.171371313 | 0           | 0           |   |
| 0            | 0            |             |             |             |   |
| ZNF204P      | ZNF204P      | 7.028227881 | 11.17150379 | 443.7493093 |   |
| 312.0516484  |              |             |             |             |   |
| TLK2         | TLK2         | 1768.770683 | 1251.208425 | 1723.211603 |   |
| 1448.070489  |              |             |             |             |   |
| FAM27B       | FAM27B       | 18.74194102 | 16.24946006 | 15.1785478  |   |
| 6.599279573  |              |             |             |             |   |
| FAM27C       | FAM27C       | 3.51411394  | 0           | 0           |   |
| 0            | 0            |             |             |             |   |
| LINC00674    | LINC00674    |             | 418.1795589 | 426.5483267 |   |
| 1291.962275  | 1309.485618  |             |             |             |   |
| LINC00910    | LINC00910    |             | 80.82462063 | 75.1537528  |   |
| 149.9997665  | 104.6457189  |             |             |             |   |
| GGNBP1       | GGNBP1       | 17.5705697  | 12.18709505 | 3.571423012 |   |
| 16.96957604  |              |             |             |             |   |
| WDR93        | WDR93        | 7.028227881 | 0           | 0           |   |
| 0            | 0            |             |             |             |   |
| MGC16275     | MGC16275     |             | 190.9335241 | 230.5392147 |   |
| 21.42853807  | 63.16453306  |             |             |             |   |
| SERTAD4-AS1  | SERTAD4-AS1  |             | 0           | 1.015591254 | 0 |
| 0            | 0            |             |             |             |   |
| HLA-F-AS1    | HLA-F-AS1    |             | 62.08267961 | 41.63924142 |   |
| 78.57130627  | 113.130507   |             |             |             |   |
| LOC646762    | LOC646762    |             | 90.19559114 | 2.031182508 |   |
| 32.14280711  | 131.0428372  |             |             |             |   |
| MSL3P1       | MSL3P1       | 480.2622385 | 445.8445605 | 248.2138993 |   |
| 308.2806315  |              |             |             |             |   |
| FAM20B       | FAM20B       | 1398.617348 | 938.4063187 | 1361.605023 |   |
| 1422.616125  |              |             |             |             |   |
| INMT-FAM188B | INMT-FAM188B |             | 72.62502143 | 66.01343151 |   |
| 38.39279738  | 90.50440557  |             |             |             |   |
| CCDC170      | CCDC170      | 0           | 16.96425931 | 0           |   |
| 0            | 0            |             |             |             |   |
| FDX1L        | FDX1L        | 619.6554248 | 867.314931  | 635.7132962 |   |
| 679.725796   |              |             |             |             |   |
| TMEM261      | TMEM261      | 1758.228342 | 1544.714297 | 1262.498035 |   |
| 1272.718203  |              |             |             |             |   |
| DSCAM        | DSCAM        | 0           | 3.571423012 | 0           |   |
| 0            | 0            |             |             |             |   |



|                         |             |               |             |   |
|-------------------------|-------------|---------------|-------------|---|
| DYNLL1 DYNLL1           | 14947.86933 | 17469.18516   | 9069.628739 |   |
| 10032.79046             |             |               |             |   |
| SOCS1 SOCS1             | 1965.561064 | 4756.013843   | 5165.170531 |   |
| 4426.231085             |             |               |             |   |
| KCNJ10 KCNJ10           | 7.028227881 | 0 0           | 0           |   |
| KCNG1 KCNG1             | 24.59879758 | 1.015591254   | 23.21424958 |   |
| 34.88190631             |             |               |             |   |
| KCNA3 KCNA3             | 8042.635438 | 3997.367176   | 5818.740942 |   |
| 6631.333217             |             |               |             |   |
| LRP1 LRP1               | 9.370970508 | 0 79.46416202 | 21.68334717 |   |
| ZNF221 ZNF221           | 60.9113083  | 29.45214637   | 112.4998249 |   |
| 87.6761429              |             |               |             |   |
| ASAH2B ASAH2B           | 35.1411394  | 42.65483267   | 53.57134518 |   |
| 49.02321969             |             |               |             |   |
| MAP3K13 MAP3K13         | 939.4397934 | 773.8805356   | 614.2847581 |   |
| 790.9707945             |             |               |             |   |
| REC114 REC114           | 2.342742627 | 2.031182508   | 11.60712479 |   |
| 1.885508449             |             |               |             |   |
| TYW5 TYW5               | 1329.506441 | 1178.085855   | 796.4273317 |   |
| 960.666555              |             |               |             |   |
| RGMB-AS1 RGMB-AS1       |             | 0 1.015591254 | 3.571423012 |   |
| 0.942754225             |             |               |             |   |
| LOC613038 LOC613038     |             | 5.856856567   | 4.062365016 | 0 |
| 3.771016899             |             |               |             |   |
| LOC388242 LOC388242     |             | 5.856856567   | 4.062365016 | 0 |
| 3.771016899             |             |               |             |   |
| LOC613037 LOC613037     |             | 100.737933    | 36.56128515 |   |
| 74.1070275 78.24860065  |             |               |             |   |
| SNORA22 SNORA22         | 7.028227881 | 3.046773762   | 6.249990271 |   |
| 16.02682182             |             |               |             |   |
| ST7-OT4 ST7-OT4         | 16.39919839 | 16.24946006   | 8.035701777 |   |
| 2.828262674             |             |               |             |   |
| TUG1 TUG1               | 2479.793071 | 914.0321286   | 1526.783338 |   |
| 1604.56769              |             |               |             |   |
| PIPSL PIPSL             | 9.370970508 | 32.49892013   | 13.3928363  |   |
| 4.713771124             |             |               |             |   |
| CATSPER2P1 CATSPER2P1   |             | 23.42742627   | 32.49892013 |   |
| 85.71415229 49.96597391 |             |               |             |   |
| GATAD2B GATAD2B         | 1060.091039 | 303.661785    | 724.1060157 |   |
| 806.9976164             |             |               |             |   |
| LRRC47 LRRC47           | 3124.047293 | 4287.826275   | 3825.886902 |   |
| 3540.984868             |             |               |             |   |
| GCHFR GCHFR             | 2033.5006   | 3247.86083    | 2455.353321 |   |
| 1975.070101             |             |               |             |   |
| CLEC11A CLEC11A         | 36.31251072 | 20.31182508   | 29.46423985 |   |
| 39.59567744             |             |               |             |   |
| ACLY ACLY               | 17134.81957 | 18332.43773   | 11294.62528 |   |
| 13247.58237             |             |               |             |   |
| EIF2B5 EIF2B5           | 6072.388889 | 7702.244071   | 7777.666465 |   |
| 6632.275971             |             |               |             |   |

|             |           |             |             |             |             |
|-------------|-----------|-------------|-------------|-------------|-------------|
| F2RL1       | F2RL1     | 12.88508445 | 39.60805891 | 506.249212  |             |
| 376.1589357 |           |             |             |             |             |
| RHOQ        | RHOQ      | 696.9659315 | 821.6133245 | 570.5348262 |             |
| 637.3018559 |           |             |             |             |             |
| TAF3        | TAF3      | 1426.73026  | 2185.552379 | 2857.13841  |             |
| 2017.494041 |           |             |             |             |             |
| ATAD3B      | ATAD3B    | 3579.710734 | 4996.70897  | 2496.424685 |             |
| 2784.89598  |           |             |             |             |             |
| MBD5        | MBD5      | 298.6996849 | 194.9935208 | 447.3207323 |             |
| 397.8422828 |           |             |             |             |             |
| SYT11       | SYT11     | 6752.955622 | 5911.75669  | 1900.889898 |             |
| 3470.278301 |           |             |             |             |             |
| EPOR        | EPOR      | 509.5465214 | 634.7445338 | 550.8919996 |             |
| 685.3823214 |           |             |             |             |             |
| CNR2        | CNR2      | 0           | 7.109138778 | 45.5356434  | 4.713771124 |
| TRAPPC13    | TRAPPC13  |             | 2060.44214  | 2023.057778 |             |
| 1591.961808 |           | 2023.150566 |             |             |             |
| BANF1       | BANF1     | 5658.894815 | 7246.243598 | 5578.562745 |             |
| 4998.482899 |           |             |             |             |             |
| OR2A9P      | OR2A9P    | 0           | 5.07795627  | 1.785711506 | 2.828262674 |
| GTF2H5      | GTF2H5    | 2219.748639 | 2453.66847  | 1355.355033 |             |
| 1337.768245 |           |             |             |             |             |
| OR2L1P      | OR2L1P    | 0           | 0           | 3.771016899 |             |
| SNORA48     | SNORA48   | 65.59679355 | 56.87311023 | 143.7497762 |             |
| 106.5312274 |           |             |             |             |             |
| TRAPPC2P1   | TRAPPC2P1 |             | 425.2077868 | 371.706399  |             |
| 691.9632086 |           | 570.366306  |             |             |             |
| HMGB3P1     | HMGB3P1   | 0           | 0           | 0.892855753 | 0           |
| ACOT1       | ACOT1     | 92.53833376 | 308.7397412 | 141.071209  |             |
| 59.39351616 |           |             |             |             |             |
| ATP5EP2     | ATP5EP2   | 55.05445173 | 17.26505132 | 8.92855753  |             |
| 44.30944856 |           |             |             |             |             |
| AGBL3       | AGBL3     | 65.59679355 | 56.87311023 | 222.3210825 |             |
| 126.3290661 |           |             |             |             |             |
| TDH         | TDH       | 0           | 2.031182508 | 0           | 1.885508449 |
| SCARNA11    | SCARNA11  |             | 0           | 0           | 3.571423012 |
| 1.885508449 |           |             |             |             |             |
| ARHGEF35    | ARHGEF35  |             | 69.11090749 | 62.96665775 |             |
| 74.1070275  |           | 82.01961755 |             |             |             |
| OXNAD1      | OXNAD1    | 2422.395876 | 2613.116297 | 2780.352815 |             |
| 2404.966027 |           |             |             |             |             |
| C11orf16    | C11orf16  |             | 3.51411394  | 12.18709505 |             |
| 8.035701777 |           | 2.828262674 |             |             |             |
| JPH1        | JPH1      | 2.342742627 | 0           | 1.785711506 | 0           |
| SDR9C7      | SDR9C7    | 0           | 0           | 3.771016899 |             |
| UNC5B       | UNC5B     | 1.171371313 | 4.062365016 | 19.64282657 | 0           |
| CCDC115     | CCDC115   | 2629.728599 | 4182.204784 | 6358.025817 |             |
| 4375.322357 |           |             |             |             |             |
| RAVER2      | RAVER2    | 79.65324932 | 35.54569389 | 119.6426709 |             |
| 161.2109724 |           |             |             |             |             |

|             |          |             |             |             |             |
|-------------|----------|-------------|-------------|-------------|-------------|
| TTC37       | TTC37    | 4844.791752 | 5648.718555 | 4095.529339 |             |
| 5053.162644 |          |             |             |             |             |
| NOD1        | NOD1     | 926.5547089 | 942.4686838 | 1166.069613 |             |
| 1731.839511 |          |             |             |             |             |
| LDHB        | LDHB     | 52074.48311 | 65047.60423 | 41895.4705  |             |
| 46138.39176 |          |             |             |             |             |
| TMEM200C    | TMEM200C |             | 2.342742627 | 2.031182508 | 0           |
| 0           |          |             |             |             |             |
| SLC5A10     | SLC5A10  | 203.8186085 | 266.0849086 | 253.5710339 |             |
| 240.4023273 |          |             |             |             |             |
| HMB0X1      | HMB0X1   | 990.9801312 | 1181.132628 | 1819.640025 |             |
| 1168.072484 |          |             |             |             |             |
| ANKRD32     | ANKRD32  | 1480.61334  | 1036.91867  | 756.2488228 |             |
| 1028.544859 |          |             |             |             |             |
| MED10       | MED10    | 3044.394044 | 3941.509657 | 4479.457313 |             |
| 3435.396395 |          |             |             |             |             |
| OGF0D1      | OGF0D1   | 5243.057999 | 6704.933459 | 6662.489629 |             |
| 6490.862837 |          |             |             |             |             |
| SNPH        | SNPH     | 331.4980817 | 228.5080322 | 940.1771079 |             |
| 759.8599051 |          |             |             |             |             |
| CCAR2       | CCAR2    | 11875.36238 | 14713.88609 | 11253.55391 |             |
| 9820.670759 |          |             |             |             |             |
| C1S         | C1S      | 9.370970508 | 3.046773762 | 0.892855753 |             |
| 14.14131337 |          |             |             |             |             |
| EPHA4       | EPHA4    | 180.3911823 | 30.46773762 | 217.8568037 |             |
| 391.2430033 |          |             |             |             |             |
| SLC12A7     | SLC12A7  | 2448.166045 | 1173.007898 | 1283.926573 |             |
| 986.1209191 |          |             |             |             |             |
| HCG9        | HCG9     | 1.171371313 | 0           | 0           | 0           |
| CAPZB       | CAPZB    | 19373.31015 | 18107.99206 | 9719.627727 |             |
| 10910.49464 |          |             |             |             |             |
| TRMT2A      | TRMT2A   | 4657.372342 | 6092.531933 | 4597.314272 |             |
| 5234.171456 |          |             |             |             |             |
| ZNF543      | ZNF543   | 620.8267961 | 550.4504597 | 601.7847775 |             |
| 771.1729558 |          |             |             |             |             |
| HNRNPH3     | HNRNPH3  | 9025.41597  | 9594.290577 | 10858.91167 |             |
| 9243.705173 |          |             |             |             |             |
| RIN1        | RIN1     | 16.39919839 | 0           | 177.6782949 | 110.3022443 |
| ACVR1B      | ACVR1B   | 42.16936728 | 31.48332888 | 168.7497373 |             |
| 146.1269048 |          |             |             |             |             |
| ULBP1       | ULBP1    | 1.171371313 | 2.031182508 | 92.85699832 |             |
| 84.84788022 |          |             |             |             |             |
| ABCF3       | ABCF3    | 2960.055309 | 3772.921509 | 4959.813708 |             |
| 3991.621387 |          |             |             |             |             |
| GKAP1       | GKAP1    | 96.0524477  | 49.76397145 | 263.3924471 |             |
| 121.615295  |          |             |             |             |             |
| PAG1        | PAG1     | 8729.059028 | 7322.412942 | 7502.666893 |             |
| 8665.796834 |          |             |             |             |             |
| UTP6        | UTP6     | 3920.579786 | 4752.967069 | 4049.10084  |             |
| 4650.606591 |          |             |             |             |             |

|              |              |             |             |             |             |
|--------------|--------------|-------------|-------------|-------------|-------------|
| LHFPL3       | LHFPL3       | 3.51411394  | 0           | 0           | 0           |
| DCK          | DCK          | 10572.79748 | 8949.390131 | 7468.738374 |             |
| 8978.791236  |              |             |             |             |             |
| DBH          | DBH          | 0           | 1.015591254 | 7.142846024 | 26.39711829 |
| PDE3A        | PDE3A        | 0           | 0           | 1.885508449 |             |
| CTDNEP1      | CTDNEP1      | 2685.954422 | 1269.489068 | 1204.462411 |             |
| 1416.016846  |              |             |             |             |             |
| EDEM2        | EDEM2        | 2628.557227 | 3236.689327 | 2206.246566 |             |
| 2830.148183  |              |             |             |             |             |
| PLET1        | PLET1        | 7.028227881 | 2.031182508 | 0           | 5.656525348 |
| SNHG21       | SNHG21       | 222.5605496 | 327.0203838 | 244.6424763 |             |
| 302.6241061  |              |             |             |             |             |
| CDH3         | CDH3         | 4.685485254 | 8.124730032 | 57.14276819 |             |
| 7.542033798  |              |             |             |             |             |
| UVRAG        | UVRAG        | 1180.742284 | 1270.504659 | 2033.925405 |             |
| 2157.96442   |              |             |             |             |             |
| TNR          | TNR          | 7.028227881 | 1.015591254 | 0           | 0.942754225 |
| NAGPA-AS1    | NAGPA-AS1    | 136.6069302 | 59.73993699 | 128.9800893 |             |
| 56.56525348  |              |             |             |             |             |
| RAPGEF2      | RAPGEF2      | 324.4698538 | 87.34084785 | 135.7140745 |             |
| 167.810252   |              |             |             |             |             |
| SNORA56      | SNORA56      | 9.370970508 | 5.07795627  | 8.035701777 |             |
| 9.427542247  |              |             |             |             |             |
| NLRP14       | NLRP14       | 4.685485254 | 14.21827756 | 0           | 0           |
| LINC01123    | LINC01123    |             | 0           | 2.031182508 | 0           |
| RFC5         | RFC5         | 4479.323903 | 4759.060616 | 2782.138526 | 0           |
| 3919.029312  |              |             |             |             |             |
| LOC100129216 | LOC100129216 |             | 10.54234182 | 14.21827756 |             |
| 24.99996108  | 16.96957604  |             |             |             |             |
| WBP5         | WBP5         | 17.5705697  | 13.2026863  | 216.963948  |             |
| 83.905126    |              |             |             |             |             |
| RNF217-AS1   | RNF217-AS1   |             | 5.856856567 | 1.015591254 |             |
| 0.892855753  | 6.599279573  |             |             |             |             |
| AKR1C6P      | AKR1C6P      | 4.685485254 | 0           | 2.678567259 | 8.484788022 |
| C6orf57      | C6orf57      | 283.4718579 | 306.7085587 | 264.2853029 |             |
| 227.2037682  |              |             |             |             |             |
| CASKIN1      | CASKIN1      | 148.7641568 | 67.02902277 | 110.7141134 |             |
| 80.1341091   |              |             |             |             |             |
| FAM96A       | FAM96A       | 5719.806124 | 5016.005204 | 3666.958578 |             |
| 4465.826762  |              |             |             |             |             |
| ZCCHC7       | ZCCHC7       | 1015.578929 | 968.8740564 | 1799.997198 |             |
| 1623.422775  |              |             |             |             |             |
| GPR137C      | GPR137C      | 51.54033779 | 27.42096386 | 9.821413283 |             |
| 25.45436407  |              |             |             |             |             |
| ZNF582-AS1   | ZNF582-AS1   |             | 48.02622385 | 47.73278894 |             |
| 406.2493676  | 160.2682182  |             |             |             |             |
| PPAP2A       | PPAP2A       | 1569.63756  | 1937.748113 | 1773.211526 |             |
| 1577.227818  |              |             |             |             |             |
| ZNF92        | ZNF92        | 1398.617348 | 877.4708435 | 1229.462372 |             |
| 1681.873537  |              |             |             |             |             |

|              |              |             |             |             |
|--------------|--------------|-------------|-------------|-------------|
| SIDT2        | SIDT2        | 249.5020898 | 183.822017  | 267.8567259 |
| 290.3683012  |              |             |             |             |
| MYL6         | MYL6         | 75075.53022 | 96585.77503 | 35199.05235 |
| 43704.20035  |              |             |             |             |
| LINC01011    | LINC01011    |             | 40.99799597 | 64.99784026 |
| 111.6069691  |              | 128.2145746 |             |             |
| MIR4284      | MIR4284      | 1.171371313 | 1.015591254 | 0           |
| MIR548Z      | MIR548Z      | 3.51411394  | 2.031182508 | 0           |
| MIR550B1     | MIR550B1     |             | 0           | 0.942754225 |
| LINC01061    | LINC01061    |             | 90.19559114 | 111.7150379 |
| 124.1069497  |              | 99.93194782 |             |             |
| CAHM         | CAHM         | 2.342742627 | 2.031182508 | 30.3570956  |
| 7.542033798  |              |             |             |             |
| YIPF1        | YIPF1        | 1534.496421 | 1759.004052 | 1497.319098 |
| 1423.558879  |              |             |             |             |
| LINC01134    | LINC01134    |             | 10.54234182 | 3.046773762 |
| 7.142846024  |              | 1.885508449 |             |             |
| LOC100134368 | LOC100134368 |             | 2.342742627 | 1.015591254 |
| 32.14280711  |              | 29.22538097 |             |             |
| GUSBP11      | GUSBP11      | 506.0324074 | 183.822017  | 675.891805  |
| 664.6417284  |              |             |             |             |
| FAM66C       | FAM66C       | 11.71371313 | 14.21827756 | 102.6784116 |
| 49.02321969  |              |             |             |             |
| MAP3K14-AS1  | MAP3K14-AS1  |             | 504.8610361 | 396.0805891 |
| 480.3563951  |              | 516.6293151 |             |             |
| MIR100HG     | MIR100HG     |             | 0           | 1.015591254 |
| 2.828262674  |              |             |             | 0           |
| FAM225A      | FAM225A      | 0           | 3.571423012 | 0           |
| LINC00086    | LINC00086    |             | 36.31251072 | 14.21827756 |
| 69.64274874  |              | 49.96597391 |             |             |
| RBPM5        | RBPM5        | 5.856856567 | 32.49892013 | 10.71426904 |
| 9.427542247  |              |             |             |             |
| ZNF341-AS1   | ZNF341-AS1   |             | 2.342742627 | 4.062365016 |
| 6.249990271  |              | 4.713771124 |             |             |
| OR1L8        | OR1L8        | 1.171371313 | 5.07795627  | 0           |
| ZNF362       | ZNF362       | 1627.034754 | 1119.181562 | 641.0704307 |
| 1163.358713  |              |             |             |             |
| TONSL        | TONSL        | 3177.930373 | 2376.483534 | 1220.533814 |
| 1423.558879  |              |             |             |             |
| NT5C1B-RDH14 | NT5C1B-RDH14 |             | 837.5304891 | 848.0186971 |
| 1681.247383  |              | 1468.811082 |             |             |
| NPTX1        | NPTX1        | 11969.07208 | 5519.738466 | 254.4638896 |
| 925.7846487  |              |             |             |             |
| SLC25A17     | SLC25A17     |             | 2211.54904  | 3004.118929 |
| 1604.461788  |              | 2098.570904 |             |             |
| MIR1224      | MIR1224      | 0           | 1.785711506 | 0           |
| GSTM2        | GSTM2        | 275.2722587 | 236.6327622 | 175.8925833 |
| 303.5668604  |              |             |             |             |
| ANXA1        | ANXA1        | 4514.465042 | 6780.087212 | 10184.80557 |
| 9387.94657   |              |             |             |             |

|              |              |             |             |             |             |
|--------------|--------------|-------------|-------------|-------------|-------------|
| LRRC6        | LRRC6        | 1.171371313 | 0           | 3.571423012 | 57.50800771 |
| TRPC5        | TRPC5        | 3.51411394  | 0           | 0           | 0.942754225 |
| PRPF6        | PRPF6        | 8861.423986 | 13737.90289 |             | 12714.26592 |
| 10757.76846  |              |             |             |             |             |
| SLC22A31     | SLC22A31     |             | 38.65525334 |             | 8.124730032 |
| 9.821413283  |              | 33.93915209 |             |             |             |
| RNPS1        | RNPS1        | 17699.42055 | 25718.83292 |             | 20775.86052 |
| 17884.9904   |              |             |             |             |             |
| SDS          | SDS          | 4.685485254 | 2.031182508 |             | 1.785711506 |
| MACC1        | MACC1        | 101.9093043 | 41.63924142 |             | 0           |
| ACYP1        | ACYP1        | 654.7965642 | 770.8337618 |             | 73.53482953 |
| 541.140925   |              |             |             |             | 483.9278181 |
| GMCL1P1      | GMCL1P1      | 0           | 0           | 1.785711506 | 1.885508449 |
| SUGT1P3      | SUGT1P3      | 42.16936728 | 22.34300759 |             | 49.99992217 |
| 60.33627038  |              |             |             |             |             |
| PRODH        | PRODH        | 62.08267961 | 17.26505132 |             | 46.42849916 |
| 26.39711829  |              |             |             |             |             |
| YKT6         | YKT6         | 3960.406411 | 3660.19088  |             | 3092.852328 |
| 2140.05209   |              |             |             |             |             |
| C6orf222     | C6orf222     |             | 10.54234182 |             | 0           |
|              |              | 27.33987252 |             |             | 60.71419121 |
| SOX7         | SOX7         | 5.856856567 | 16.24946006 |             | 0           |
| THAP2        | THAP2        | 310.4133981 | 315.84888   |             | 46.19495701 |
| 543.9691877  |              |             |             |             | 607.1419121 |
| PPM1G        | PPM1G        | 12922.56833 | 17108.65027 |             | 9979.448752 |
| 9670.772837  |              |             |             |             |             |
| WDFY3        | WDFY3        | 43.3407386  | 2.031182508 |             | 0           |
| GOLGA2P6     | GOLGA2P6     |             | 0           |             | 33.93915209 |
| 4.713771124  |              |             |             |             | 1.785711506 |
| CNIH3        | CNIH3        | 9.370970508 | 2.031182508 |             | 0           |
| COQ9         | COQ9         | 2965.912166 | 4257.358537 |             | 19.79783872 |
| 2864.087335  |              |             |             |             | 2709.81721  |
| ATP13A4      | ATP13A4      | 37.48388203 | 10.15591254 |             | 58.9284797  |
| 29.22538097  |              |             |             |             |             |
| C5AR2        | C5AR2        | 2.342742627 | 7.109138778 |             | 0           |
| ASAP1        | ASAP1        | 1341.220154 | 775.9117181 |             | 0           |
| 1770.492434  |              |             |             |             | 1613.390346 |
| PDCD1LG2     | PDCD1LG2     |             | 454.4920696 |             | 289.4435074 |
| 99.10698859  |              | 228.1465224 |             |             |             |
| REL          | REL          | 1413.845175 | 1066.370817 |             | 2302.674987 |
| 2204.159377  |              |             |             |             |             |
| SSH3         | SSH3         | 250.6734611 | 132.026863  |             | 183.0354294 |
| 436.495206   |              |             |             |             |             |
| C8orf44-SGK3 | C8orf44-SGK3 |             | 319.7843686 |             | 386.9402678 |
| 2571.424569  |              | 2150.422387 |             |             |             |
| RTCA         | RTCA         | 4790.908672 | 5859.961536 |             | 2767.852834 |
| 3733.30673   |              |             |             |             |             |
| CLK3         | CLK3         | 3887.781389 | 5111.470782 |             | 5608.919841 |
| 4606.297142  |              |             |             |             |             |
| ADAMDEC1     | ADAMDEC1     |             | 0           |             | 0           |
|              |              |             |             |             | 175.8925833 |

|                 |              |             |             |             |             |
|-----------------|--------------|-------------|-------------|-------------|-------------|
| 16.96957604     |              |             |             |             |             |
| LOC100133669    | LOC100133669 |             | 63.25405093 | 56.87311023 |             |
| 93.74985407     | 112.1877527  |             |             |             |             |
| LOC100130673    | LOC100130673 |             | 1.171371313 | 0           | 0           |
| ZNF510 ZNF510   | 413.4940737  |             | 284.3655511 | 821.4272928 | 0           |
| 579.7938482     |              |             |             |             |             |
| C3AR1 C3AR1     | 302.2137989  |             | 510.8424008 | 366.0708587 |             |
| 447.8082567     |              |             |             |             |             |
| PPY PPY         | 5.856856567  |             | 3.046773762 | 0           | 0           |
| RPS6KB2 RPS6KB2 | 4986.527681  |             | 6075.266882 | 5547.312794 |             |
| 4822.187859     |              |             |             |             |             |
| CDS1 CDS1       | 0            | 2.031182508 | 99.10698859 | 44.30944856 |             |
| EXOC5 EXOC5     | 7151.221869  |             | 6369.788345 | 5125.884878 |             |
| 6105.276359     |              |             |             |             |             |
| CIC CIC         | 429.893272   |             | 123.902133  | 162.4997471 |             |
| 208.3486837     |              |             |             |             |             |
| C2orf82 C2orf82 | 1.171371313  |             | 3.046773762 | 0.892855753 | 0           |
| USF1 USF1       | 835.1877465  |             | 404.2053191 | 951.7842327 |             |
| 782.4860065     |              |             |             |             |             |
| BMP1 BMP1       | 105.4234182  |             | 123.902133  | 179.4640064 |             |
| 181.0088111     |              |             |             |             |             |
| FAM83H-AS1      | FAM83H-AS1   |             | 7.028227881 | 0           | 1.785711506 |
| 0               |              |             |             |             |             |
| LOC100507373    | LOC100507373 |             | 72.62502143 | 38.59246765 |             |
| 72.321316       | 57.50800771  |             |             |             |             |
| PLBD1-AS1       | PLBD1-AS1    |             | 0           | 0           | 11.60712479 |
| C12orf45        | C12orf45     |             | 657.1393069 | 861.2213834 | 0           |
| 706.2489006     | 466.6633412  |             |             |             |             |
| ARL14EP ARL14EP | 1867.165874  |             | 2126.648086 | 2422.317658 |             |
| 2082.544082     |              |             |             |             |             |
| LILRB3 LILRB3   | 78.481878    |             | 58.90429273 | 66.96418148 |             |
| 96.16093092     |              |             |             |             |             |
| NUDCD3 NUDCD3   | 4380.928712  |             | 5793.948104 | 5938.383613 |             |
| 5436.863614     |              |             |             |             |             |
| RHBDL2 RHBDL2   | 10.54234182  |             | 9.140321286 | 16.07140355 |             |
| 6.599279573     |              |             |             |             |             |
| LOC653786       | LOC653786    |             | 0           | 4.062365016 | 18.74997081 |
| 0.942754225     |              |             |             |             |             |
| ALMS1P ALMS1P   | 0            | 0           | 13.3928363  | 0           |             |
| TFE3 TFE3       | 3252.898137  |             | 2007.823909 | 2164.282345 |             |
| 1914.73383      |              |             |             |             |             |
| ANKUB1 ANKUB1   | 1.171371313  |             | 0           | 6.249990271 | 0           |
| FCER1G FCER1G   | 113.6230174  |             | 752.5531193 | 374.1065605 |             |
| 100.874702      |              |             |             |             |             |
| EIF4EBP1        | EIF4EBP1     |             | 1696.145662 | 2615.147479 |             |
| 1674.997393     | 1455.612523  |             |             |             |             |
| SIM2 SIM2       | 0            | 6.093547524 | 14.28569205 | 11.3130507  |             |
| FASN FASN       | 952.3248778  |             | 149.2919143 | 152.6783338 |             |
| 208.3486837     |              |             |             |             |             |
| CHURC1 CHURC1   | 6258.636928  |             | 5679.186293 | 8880.34332  |             |

|              |              |             |             |             |
|--------------|--------------|-------------|-------------|-------------|
| 9696.227201  |              |             |             |             |
| SPATA21      | SPATA21      | 15.22782708 | 1.015591254 | 33.92851862 |
| 22.62610139  |              |             |             |             |
| ATP11A       | ATP11A       | 2236.147837 | 1413.703026 | 1010.712712 |
| 1630.964809  |              |             |             |             |
| MY01D        | MY01D        | 144.0786716 | 297.5682374 | 598.2133545 |
| 511.915544   |              |             |             |             |
| NLN          | NLN          | 1343.562897 | 1918.451879 | 1002.677011 |
| 1244.435577  |              |             |             |             |
| TIPARP-AS1   | TIPARP-AS1   |             | 190.9335241 | 156.4010531 |
| 166.0711701  |              | 180.0660569 |             |             |
| ENAM         | ENAM         | 0           | 0           | 2.828262674 |
| TMEM182      | TMEM182      | 117.1371313 | 164.5257832 | 280.3567065 |
| 213.0624548  |              |             |             |             |
| UNK          | UNK          | 1327.163698 | 1217.693914 | 1768.747247 |
| 1465.982819  |              |             |             |             |
| FAM175B      | FAM175B      | 1584.865387 | 1830.09544  | 1713.39019  |
| 1934.531669  |              |             |             |             |
| CRTAC1       | CRTAC1       | 1.171371313 | 0           | 0           |
| C1orf216     | C1orf216     |             | 2642.613683 | 3666.284427 |
| 2124.103836  |              | 2523.75306  |             |             |
| UTP15        | UTP15        | 2265.43212  | 2156.100232 | 1944.63983  |
| 2342.744248  |              |             |             |             |
| USP42        | USP42        | 2035.843343 | 1398.469157 | 2903.566909 |
| 2048.60493   |              |             |             |             |
| C2orf76      | C2orf76      | 290.5000857 | 348.3478001 | 291.0709755 |
| 277.1697421  |              |             |             |             |
| R3HDM4       | R3HDM4       | 7147.707755 | 6141.280313 | 6380.347211 |
| 5909.183481  |              |             |             |             |
| GRM2         | GRM2         | 2.342742627 | 2.031182508 | 0           |
|              |              |             |             | 5.656525348 |
| MIR626       | MIR626       | 0           | 0           | 0.942754225 |
| MIR624       | MIR624       | 0           | 1.015591254 | 0           |
|              |              |             |             | 0.942754225 |
| LOC100506083 | LOC100506083 |             | 746.1635267 | 1098.869737 |
| 755.3559671  |              | 713.6649481 |             |             |
| ATXN1        | ATXN1        | 1966.732435 | 1181.132628 | 923.2128486 |
| 1360.394346  |              |             |             |             |
| TMC6         | TMC6         | 9534.962492 | 11126.81778 | 6250.883127 |
| 6689.783979  |              |             |             |             |
| TMEM2        | TMEM2        | 4957.243399 | 2825.374869 | 1491.069108 |
| 2411.565307  |              |             |             |             |
| KIF26A       | KIF26A       | 14.05645576 | 1.015591254 | 0           |
| CECR5        | CECR5        | 1903.478384 | 3210.283954 | 2885.709794 |
| 2250.354334  |              |             |             |             |
| PEAK1        | PEAK1        | 417.0081876 | 428.5795092 | 283.9281295 |
| 396.8995286  |              |             |             |             |
| MRPS24       | MRPS24       | 3051.422272 | 3538.319929 | 2549.103175 |
| 2453.046493  |              |             |             |             |
| C1QTNF4      | C1QTNF4      | 2.342742627 | 0           | 0           |
|              |              |             |             | 3.771016899 |
| PTRF         | PTRF         | 4.685485254 | 34.53010264 | 72.321316   |
| 15.0840676   |              |             |             |             |



|              |              |             |             |             |             |
|--------------|--------------|-------------|-------------|-------------|-------------|
| UQCRC2       | UQCRC2       | 13440.31445 | 17389.96904 | 7595.523891 |             |
| 9394.545849  |              |             |             |             |             |
| KIF1A        | KIF1A        | 0           | 3.046773762 | 10.71426904 | 0           |
| BCL9         | BCL9         | 776.6191808 | 499.670897  | 732.1417175 |             |
| 799.4555826  |              |             |             |             |             |
| RAB11FIP4    | RAB11FIP4    |             | 2274.803091 | 2714.675422 |             |
| 3689.279972  |              | 3074.321527 |             |             |             |
| IGJ          | IGJ          | 311.5847694 | 103.5903079 | 0.892855753 |             |
| 11.3130507   |              |             |             |             |             |
| RHOBTB3      | RHOBTB3      | 74.96776406 | 33.51451138 | 103.5712674 |             |
| 91.4471598   |              |             |             |             |             |
| UNC45A       | UNC45A       | 6660.417288 | 8426.360635 | 5038.385014 |             |
| 5698.006534  |              |             |             |             |             |
| COR06        | COR06        | 48.02622385 | 25.38978135 | 66.07132572 |             |
| 33.93915209  |              |             |             |             |             |
| MUM1         | MUM1         | 1248.68182  | 1194.335315 | 1244.64092  |             |
| 1253.863119  |              |             |             |             |             |
| SBSPON       | SBSPON       | 2.342742627 | 2.031182508 | 15.1785478  |             |
| 2.828262674  |              |             |             |             |             |
| KRT3         | KRT3         | 0           | 0           | 4.713771124 |             |
| TAGAP        | TAGAP        | 3757.759174 | 2380.545899 | 8506.236759 |             |
| 8160.480569  |              |             |             |             |             |
| ASXL2        | ASXL2        | 1463.042771 | 776.9273093 | 1145.533931 |             |
| 1227.466001  |              |             |             |             |             |
| DARS2        | DARS2        | 4841.277639 | 5580.673941 | 3236.602105 |             |
| 4246.165028  |              |             |             |             |             |
| ZNF791       | ZNF791       | 1561.437961 | 1757.988461 | 2202.675143 |             |
| 2412.508061  |              |             |             |             |             |
| SCAP         | SCAP         | 6490.568448 | 6803.445811 | 5066.063543 |             |
| 5756.457296  |              |             |             |             |             |
| ARFIP2       | ARFIP2       | 1884.736443 | 2235.31635  | 3298.209152 |             |
| 2611.429202  |              |             |             |             |             |
| WNT7B        | WNT7B        | 1.171371313 | 0           | 0           | 8.484788022 |
| FZD4         | FZD4         | 16.39919839 | 14.21827756 | 25.89281684 |             |
| 7.542033798  |              |             |             |             |             |
| GRHPR        | GRHPR        | 2418.881762 | 3234.658144 | 2771.424257 |             |
| 2792.438014  |              |             |             |             |             |
| ZNF525       | ZNF525       | 602.0848551 | 345.3010264 | 1350.890754 |             |
| 1393.390744  |              |             |             |             |             |
| AQP7         | AQP7         | 12.88508445 | 6.093547524 | 0           | 7.542033798 |
| HTRA1        | HTRA1        | 0           | 0           | 40.17850889 | 29.22538097 |
| IFNL4        | IFNL4        | 0           | 0           | 20.53568232 | 5.656525348 |
| C5orf66      | C5orf66      | 3591.424447 | 4709.296645 | 1874.104226 |             |
| 2263.552894  |              |             |             |             |             |
| FZR1         | FZR1         | 2369.684167 | 1782.362651 | 1528.569049 |             |
| 1468.811082  |              |             |             |             |             |
| LOC100129316 | LOC100129316 |             | 2.342742627 | 2.031182508 | 0           |
|              | 0.942754225  |             |             |             |             |
| C15orf37     | C15orf37     |             | 374.8388203 | 413.3456404 |             |
| 299.1066773  | 330.9067329  |             |             |             |             |

|              |              |             |             |             |             |
|--------------|--------------|-------------|-------------|-------------|-------------|
| LAMTOR2      | LAMTOR2      | 3320.837674 | 4021.741366 | 2363.389178 |             |
| 2278.636961  |              |             |             |             |             |
| POLR2G       | POLR2G       | 7024.713767 | 7076.639858 | 5334.813124 |             |
| 6159.01335   |              |             |             |             |             |
| P4HB         | P4HB         | 27397.20365 | 42207.97252 | 28221.38464 |             |
| 22298.02292  |              |             |             |             |             |
| MSL1         | MSL1         | 883.2139703 | 529.1230434 | 534.8205961 |             |
| 458.1785532  |              |             |             |             |             |
| LOC100507195 | LOC100507195 |             | 112.4516461 | 30.46773762 |             |
| 49.10706642  | 212.1197006  |             |             |             |             |
| LOC101928988 | LOC101928988 |             | 19.91331233 | 4.062365016 |             |
| 1.785711506  | 16.02682182  |             |             |             |             |
| ZC3H12C      | ZC3H12C      | 113.6230174 | 64.99784026 | 3.571423012 |             |
| 47.13771124  |              |             |             |             |             |
| NAALAD2      | NAALAD2      | 0           | 7.142846024 | 5.656525348 |             |
| 0            | 0            |             |             |             |             |
| SLC17A7      | SLC17A7      | 1.171371313 | 3.046773762 | 0           | 0           |
| KRT86        | KRT86        | 7.028227881 | 29.45214637 | 15.1785478  |             |
| 7.542033798  |              |             |             |             |             |
| ACTR1A       | ACTR1A       | 9681.383906 | 8965.639591 | 5845.526615 |             |
| 6170.326401  |              |             |             |             |             |
| ADAMTS3      | ADAMTS3      | 1.171371313 | 0           | 0           | 0           |
| PPP1R7       | PPP1R7       | 5305.140679 | 7055.312442 | 4424.100256 |             |
| 4792.962478  |              |             |             |             |             |
| PARP4        | PARP4        | 14098.62513 | 11670.1591  | 7427.667009 |             |
| 9010.84488   |              |             |             |             |             |
| HEXIM1       | HEXIM1       | 741.4780414 | 668.2590452 | 841.0701194 |             |
| 770.2302016  |              |             |             |             |             |
| NDST1        | NDST1        | 62.08267961 | 29.45214637 | 0           | 40.53843166 |
| HIST1H2AK    | HIST1H2AK    |             | 71.45365012 | 62.96665775 |             |
| 48.21421066  | 26.39711829  |             |             |             |             |
| HIST1H2AI    | HIST1H2AI    |             | 100.737933  | 88.3564391  |             |
| 29.46423985  | 32.05364364  |             |             |             |             |
| FZD9         | FZD9         | 12.88508445 | 4.062365016 | 37.49994163 | 0           |
| GCM1         | GCM1         | 0           | 1.015591254 | 0           | 3.771016899 |
| TALD01       | TALD01       | 16410.9121  | 22774.63387 | 13993.72822 |             |
| 12189.81213  |              |             |             |             |             |
| GRSF1        | GRSF1        | 10182.73083 | 12895.97774 | 9097.307268 |             |
| 10385.38054  |              |             |             |             |             |
| RSP01        | RSP01        | 0           | 4.464278765 | 0           |             |
| ARHGAP5      | ARHGAP5      | 848.0728309 | 963.7961001 | 2508.924666 |             |
| 2317.289884  |              |             |             |             |             |
| LOC100996437 | LOC100996437 |             | 16.39919839 | 14.21827756 |             |
| 29.46423985  | 32.05364364  |             |             |             |             |
| PLA2G16      | PLA2G16      | 657.1393069 | 788.0988131 | 514.2849137 |             |
| 441.2089772  |              |             |             |             |             |
| FAM50A       | FAM50A       | 3310.295332 | 3689.643026 | 2574.995992 |             |
| 3234.589745  |              |             |             |             |             |
| ZNF24        | ZNF24        | 4213.422615 | 3205.205998 | 6682.132456 |             |
| 6221.235129  |              |             |             |             |             |
| PDCD5        | PDCD5        | 4891.646605 | 6619.623794 | 4398.207439 |             |

|             |           |             |             |             |             |
|-------------|-----------|-------------|-------------|-------------|-------------|
| 4256.535325 |           |             |             |             |             |
| HGS         | HGS       | 6522.195473 | 8184.649916 | 7324.988598 |             |
| 6841.567409 |           |             |             |             |             |
| EIF2AK3     | EIF2AK3   | 2595.758831 | 2263.752905 | 2915.174034 |             |
| 2433.248654 |           |             |             |             |             |
| ZNF593      | ZNF593    | 1602.435957 | 2086.024436 | 1278.569438 |             |
| 1494.265446 |           |             |             |             |             |
| USP8        | USP8      | 4173.59599  | 3751.594092 | 4420.528833 |             |
| 4186.771512 |           |             |             |             |             |
| RUFY3       | RUFY3     | 168.6774691 | 196.009112  | 564.2848359 |             |
| 599.5916869 |           |             |             |             |             |
| ZNF14       | ZNF14     | 632.5405093 | 957.7025526 | 2961.602533 |             |
| 2456.81751  |           |             |             |             |             |
| NTHL1       | NTHL1     | 1224.083023 | 1747.832548 | 554.4634226 |             |
| 724.0352446 |           |             |             |             |             |
| GOT2        | GOT2      | 13765.95568 | 18886.95055 | 9275.878418 |             |
| 12203.95344 |           |             |             |             |             |
| NPTX2       | NPTX2     | 0           | 0           | 12.25580492 |             |
| GLRX5       | GLRX5     | 3992.033436 | 4449.305284 | 2872.316958 |             |
| 3101.661399 |           |             |             |             |             |
| TRIAP1      | TRIAP1    | 3324.351788 | 4687.969229 | 3466.958889 |             |
| 2540.722636 |           |             |             |             |             |
| HSPB9       | HSPB9     | 10.54234182 | 0           | 0           | 0.942754225 |
| MIR6824     | MIR6824   | 56.22582305 | 25.38978135 | 8.035701777 |             |
| 37.71016899 |           |             |             |             |             |
| TMEM39A     | TMEM39A   | 1798.054966 | 2368.358804 | 2270.53218  |             |
| 1949.615737 |           |             |             |             |             |
| DLG5        | DLG5      | 209.6754651 | 86.32525659 | 12.49998054 |             |
| 72.5920753  |           |             |             |             |             |
| UNC5C       | UNC5C     | 3.51411394  | 3.046773762 | 5.357134518 | 0           |
| ANKRD63     | ANKRD63   | 0           | 5.07795627  | 0           |             |
| TGFBRAP1    | TGFBRAP1  |             | 3639.450671 | 3956.743526 |             |
| 3255.352076 |           | 2757.556107 |             |             |             |
| FAM110B     | FAM110B   | 18.74194102 | 14.21827756 | 6.249990271 |             |
| 40.53843166 |           |             |             |             |             |
| TNFRSF10B   | TNFRSF10B |             | 2045.214313 | 2671.004998 |             |
| 6800.882271 |           | 4103.80914  |             |             |             |
| GALR2       | GALR2     | 86.6814772  | 138.1204106 | 50.89277792 |             |
| 82.96237177 |           |             |             |             |             |
| MTF1        | MTF1      | 2135.409904 | 2692.332414 | 2683.924394 |             |
| 2364.427596 |           |             |             |             |             |
| GOLT1B      | GOLT1B    | 4047.087888 | 4194.391879 | 3015.173878 |             |
| 4017.075752 |           |             |             |             |             |
| ZNF117      | ZNF117    | 274.1008873 | 138.1204106 | 104.4641231 |             |
| 208.3486837 |           |             |             |             |             |
| MT3         | MT3       | 11.71371313 | 5.07795627  | 16.96425931 |             |
| 47.13771124 |           |             |             |             |             |
| NUP214      | NUP214    | 4930.301858 | 3803.389246 | 4245.529106 |             |
| 4713.771124 |           |             |             |             |             |
| GUCY2C      | GUCY2C    | 1.171371313 | 0           | 0           | 0           |

|              |              |             |             |             |             |
|--------------|--------------|-------------|-------------|-------------|-------------|
| SF3A3        | SF3A3        | 10595.05353 | 13736.8873  | 10415.16236 |             |
| 10285.44859  |              |             |             |             |             |
| PRRC2C       | PRRC2C       | 7793.133348 | 6580.015735 | 8658.022237 |             |
| 8566.80764   |              |             |             |             |             |
| FTCD         | FTCD         | 0           | 1.015591254 | 18.74997081 | 0           |
| ZNF783       | ZNF783       | 655.9679355 | 511.857992  | 924.1057044 |             |
| 758.9171509  |              |             |             |             |             |
| TRMT61B      | TRMT61B      | 979.2664181 | 956.6869613 | 1387.49784  |             |
| 1097.365918  |              |             |             |             |             |
| NARFL        | NARFL        | 2708.210477 | 3136.145793 | 2513.388945 |             |
| 2615.200219  |              |             |             |             |             |
| TTC31        | TTC31        | 3384.091725 | 3393.09038  | 2758.031421 |             |
| 2660.452422  |              |             |             |             |             |
| BMS1P6       | BMS1P6       | 7.028227881 | 3.046773762 | 13.3928363  |             |
| 29.22538097  |              |             |             |             |             |
| LRRN1        | LRRN1        | 42.16936728 | 7.109138778 | 81.24987353 |             |
| 31.11088942  |              |             |             |             |             |
| C19orf68     | C19orf68     |             | 128.8508445 | 142.1827756 |             |
| 159.8211798  | 192.3218618  |             |             |             |             |
| LINC01003    | LINC01003    |             | 262.3871742 | 173.6661044 |             |
| 283.0352737  | 357.3038512  |             |             |             |             |
| PATE4        | PATE4        | 2.342742627 | 1.015591254 | 0           | 0           |
| VSTM5        | VSTM5        | 0           | 0           | 1.885508449 |             |
| LOC102724589 | LOC102724589 |             | 3.51411394  | 1.015591254 | 0           |
| 0            |              |             |             |             |             |
| PTAR1        | PTAR1        | 569.2864583 | 355.4569389 | 695.5346316 |             |
| 485.5184257  |              |             |             |             |             |
| RPS3         | RPS3         | 29375.6498  | 36711.59265 | 37767.79835 |             |
| 32961.51596  |              |             |             |             |             |
| ACSBG1       | ACSBG1       | 8.199599194 | 14.21827756 | 0           | 12.25580492 |
| TOR1A        | TOR1A        | 6280.892983 | 8045.513915 | 5734.812502 |             |
| 5328.446878  |              |             |             |             |             |
| MTMR2        | MTMR2        | 4984.184939 | 5513.644918 | 2698.210086 |             |
| 4110.40842   |              |             |             |             |             |
| MMP17        | MMP17        | 7.028227881 | 4.062365016 | 0           | 12.25580492 |
| TOP2A        | TOP2A        | 29595.86761 | 26353.57745 | 9922.305983 |             |
| 17234.48998  |              |             |             |             |             |
| C2orf50      | C2orf50      | 2.342742627 | 0           | 0           | 0.942754225 |
| ACVR2B-AS1   | ACVR2B-AS1   |             | 2.342742627 | 1.015591254 | 0           |
| 10.37029647  |              |             |             |             |             |
| HYMAI        | HYMAI        | 21.08468364 | 30.46773762 | 24.99996108 |             |
| 32.05364364  |              |             |             |             |             |
| HIST2H2BF    | HIST2H2BF    |             | 28.11291152 | 16.24946006 |             |
| 11.60712479  | 5.656525348  |             |             |             |             |
| COMMD3-BMI1  | COMMD3-BMI1  |             | 8741.944112 | 8651.821893 |             |
| 7716.952273  | 8516.841666  |             |             |             |             |
| SMLR1        | SMLR1        | 1.171371313 | 0           | 0           | 0           |
| SMIM17       | SMIM17       | 0           | 1.015591254 | 0           | 0.942754225 |
| RPS28        | RPS28        | 6644.01809  | 4440.164963 | 5322.313144 |             |
| 6300.426484  |              |             |             |             |             |

|              |              |             |             |             |             |
|--------------|--------------|-------------|-------------|-------------|-------------|
| C19orf84     | C19orf84     | 2.342742627 | 0           | 0           | 0           |
| RPS27        | RPS27        | 14432.46595 | 11229.3925  | 29621.38246 |             |
| 23311.48371  |              |             |             |             |             |
| PINLYP       | PINLYP       | 90.19559114 | 146.2451406 | 51.78563368 |             |
| 49.02321969  |              |             |             |             |             |
| GARS         | GARS         | 14522.66154 | 19468.88434 | 17158.90186 |             |
| 15677.06     |              |             |             |             |             |
| HSPE1-MOB4   | HSPE1-MOB4   | 11078.82988 | 12251.0773  |             |             |
| 11542.83918  | 11619.44582  |             |             |             |             |
| SH3BGRL      | SH3BGRL      | 4004.918521 | 3604.333361 | 4450.885929 |             |
| 5335.988912  |              |             |             |             |             |
| MPZ          | MPZ          | 5.856856567 | 9.140321286 | 16.07140355 |             |
| 12.25580492  |              |             |             |             |             |
| GPC5         | GPC5         | 0           | 0           | 16.07140355 | 13.19855915 |
| SNRNP40      | SNRNP40      | 9314.744685 | 12730.43637 | 8251.77287  |             |
| 8764.786027  |              |             |             |             |             |
| AP4M1        | AP4M1        | 1042.520469 | 805.3638645 | 574.999105  |             |
| 985.1781648  |              |             |             |             |             |
| APEH         | APEH         | 8891.87964  | 11548.28815 | 7181.238822 |             |
| 8248.156712  |              |             |             |             |             |
| HLA-DQA1     | HLA-DQA1     | 1142.087031 | 380.8467203 |             |             |
| 258.9281684  | 597.7061785  |             |             |             |             |
| URGCP-MRPS24 | URGCP-MRPS24 | 3230.642083 | 3747.531727 |             |             |
| 2794.638507  | 2701.933608  |             |             |             |             |
| ZCRB1        | ZCRB1        | 4147.825821 | 3489.571549 | 2801.781353 |             |
| 3498.560928  |              |             |             |             |             |
| AARS2        | AARS2        | 2458.708387 | 2938.105498 | 2633.031616 |             |
| 2531.295093  |              |             |             |             |             |
| ZNF626       | ZNF626       | 248.3307185 | 394.0494066 | 820.534437  |             |
| 644.8438897  |              |             |             |             |             |
| C5orf15      | C5orf15      | 2782.006869 | 2721.784561 | 2516.960368 |             |
| 2247.526072  |              |             |             |             |             |
| RPL26L1      | RPL26L1      | 2191.635727 | 2801.000679 | 1358.0336   |             |
| 1531.032861  |              |             |             |             |             |
| AEBP1        | AEBP1        | 140.5645576 | 126.9489068 | 181.2497179 |             |
| 132.9283457  |              |             |             |             |             |
| XCL1         | XCL1         | 124.1653592 | 414.3612317 | 2552.674598 |             |
| 290.3683012  |              |             |             |             |             |
| CXCL5        | CXCL5        | 0           | 0           | 0.892855753 | 0           |
| MIR6074      | MIR6074      | 0           | 0           | 0.942754225 |             |
| TMEM192      | TMEM192      | 754.3631259 | 891.6891211 | 1786.604362 |             |
| 1124.70579   |              |             |             |             |             |
| ZNF844       | ZNF844       | 26.94154021 | 26.40537261 | 909.8200123 |             |
| 614.6757545  |              |             |             |             |             |
| C11orf86     | C11orf86     | 0           | 1.015591254 | 0           | 0           |
| MUC12        | MUC12        | 37.48388203 | 63.98224901 | 16.07140355 |             |
| 11.3130507   |              |             |             |             |             |
| PRR12        | PRR12        | 80.82462063 | 12.18709505 | 38.39279738 |             |
| 25.45436407  |              |             |             |             |             |
| PLXNA3       | PLXNA3       | 474.405382  | 133.0424543 | 201.7854002 |             |

|             |          |             |             |             |             |
|-------------|----------|-------------|-------------|-------------|-------------|
| 298.8530892 |          |             |             |             |             |
| NDUFAF7     | NDUFAF7  | 673.5385052 | 737.3192504 | 980.3556168 |             |
| 1045.514435 |          |             |             |             |             |
| PCF11       | PCF11    | 2482.135813 | 1884.937368 | 3894.636795 |             |
| 3246.84555  |          |             |             |             |             |
| TERF1       | TERF1    | 1573.151674 | 1574.166444 | 1158.033912 |             |
| 1328.340703 |          |             |             |             |             |
| CD81        | CD81     | 3660.535355 | 6815.632906 | 4541.06436  |             |
| 1704.499638 |          |             |             |             |             |
| AMOTL2      | AMOTL2   | 0           | 0           | 29.46423985 | 5.656525348 |
| FRMD1       | FRMD1    | 0           | 0           | 24.99996108 | 0           |
| WDR59       | WDR59    | 2052.242541 | 1007.466524 | 1240.176641 |             |
| 1661.132944 |          |             |             |             |             |
| RBM7        | RBM7     | 2264.260749 | 2155.084641 | 2760.709988 |             |
| 2635.940812 |          |             |             |             |             |
| TAF1D       | TAF1D    | 853.9296875 | 746.4595717 | 1115.176836 |             |
| 950.2962585 |          |             |             |             |             |
| DDX28       | DDX28    | 2468.079357 | 3462.150585 | 2990.173917 |             |
| 2680.250261 |          |             |             |             |             |
| FBXL8       | FBXL8    | 394.7521326 | 461.0784293 | 190.1782754 |             |
| 312.9944026 |          |             |             |             |             |
| UBL5        | UBL5     | 8586.151728 | 8055.669827 | 6022.312054 |             |
| 5534.910053 |          |             |             |             |             |
| AP00        | AP00     | 834.0163752 | 799.2703169 | 708.0346122 |             |
| 777.7722354 |          |             |             |             |             |
| C1orf146    | C1orf146 |             | 2.342742627 | 1.015591254 |             |
| 5.357134518 |          |             |             |             |             |
| C4orf36     | C4orf36  | 0           | 2.031182508 | 30.3570956  | 18.85508449 |
| SEC16A      | SEC16A   | 7561.201828 | 3410.355431 | 3410.708977 |             |
| 3846.437237 |          |             |             |             |             |
| GPRC5D      | GPRC5D   | 2.342742627 | 7.109138778 | 8.92855753  |             |
| 12.25580492 |          |             |             |             |             |
| ARNT2       | ARNT2    | 1.171371313 | 0           | 0           | 0           |
| NANOS2      | NANOS2   | 0           | 1.015591254 | 0           | 0           |
| IRF4        | IRF4     | 15264.13959 | 13937.97437 | 9719.627727 |             |
| 11594.93421 |          |             |             |             |             |
| RNF187      | RNF187   | 6533.909186 | 6992.345784 | 6550.88266  |             |
| 6472.007753 |          |             |             |             |             |
| PLA2G1B     | PLA2G1B  | 5.856856567 | 0           | 8.92855753  | 3.771016899 |
| GRM6        | GRM6     | 2.342742627 | 0           | 0           | 0           |
| KBTBD6      | KBTBD6   | 544.6876608 | 494.5929407 | 944.6413867 |             |
| 663.6989742 |          |             |             |             |             |
| MST1R       | MST1R    | 72.62502143 | 89.37203036 | 88.39271955 |             |
| 175.3522858 |          |             |             |             |             |
| CATSPER3    | CATSPER3 |             | 29.28428284 | 40.62365016 |             |
| 24.10710533 |          |             |             |             |             |
| KIAA1614    | KIAA1614 |             | 14.05645576 | 0           | 1.785711506 |
| 6.599279573 |          |             |             |             |             |
| PHF13       | PHF13    | 1511.068994 | 1034.887488 | 1434.819195 |             |
| 1053.056469 |          |             |             |             |             |

|             |             |             |             |             |             |
|-------------|-------------|-------------|-------------|-------------|-------------|
| YPEL2       | YPEL2       | 1204.16971  | 937.3907275 | 1217.855247 |             |
| 1188.813077 |             |             |             |             |             |
| PLK5        | PLK5        | 0           | 0           | 0.942754225 |             |
| PDGFA       | PDGFA       | 16.39919839 | 9.140321286 | 1.785711506 |             |
| 24.51160984 |             |             |             |             |             |
| HSPG2       | HSPG2       | 5.856856567 | 2.031182508 | 32.14280711 |             |
| 32.05364364 |             |             |             |             |             |
| MGARP       | MGARP       | 9.370970508 | 4.062365016 | 24.99996108 |             |
| 6.599279573 |             |             |             |             |             |
| WASH3P      | WASH3P      | 202.6472372 | 172.6505132 | 258.0353126 |             |
| 207.4059294 |             |             |             |             |             |
| YBX1        | YBX1        | 6990.743999 | 3335.201678 | 2567.853146 |             |
| 3135.600551 |             |             |             |             |             |
| RAB40B      | RAB40B      | 112.4516461 | 161.4790094 | 199.9996887 |             |
| 303.5668604 |             |             |             |             |             |
| MOB1B       | MOB1B       | 509.5465214 | 268.1160911 | 180.3568621 |             |
| 374.2734272 |             |             |             |             |             |
| CIA01       | CIA01       | 6189.52602  | 7757.085998 | 7872.309174 |             |
| 7556.175111 |             |             |             |             |             |
| RAB33A      | RAB33A      | 1507.55488  | 2220.082481 | 975.8913381 |             |
| 961.6093092 |             |             |             |             |             |
| PALD1       | PALD1       | 14.05645576 | 68.04461402 | 36.60708587 |             |
| 61.27902461 |             |             |             |             |             |
| COQ4        | COQ4        | 1624.692012 | 2147.975502 | 1622.318903 |             |
| 1463.154557 |             |             |             |             |             |
| NDC80       | NDC80       | 7287.100941 | 6745.557109 | 2995.531051 |             |
| 4450.742695 |             |             |             |             |             |
| C22orf15    | C22orf15    |             | 73.79639275 | 33.51451138 |             |
| 20.53568232 | 42.42394011 |             |             |             |             |
| TRAF3IP3    | TRAF3IP3    |             | 22060.43595 | 28385.77555 |             |
| 13238.37225 | 15245.27857 |             |             |             |             |
| LGI4        | LGI4        | 4.685485254 | 13.2026863  | 29.46423985 | 0           |
| OLIG3       | OLIG3       | 28.11291152 | 42.65483267 | 104.4641231 |             |
| 45.25220279 |             |             |             |             |             |
| SLC9C1      | SLC9C1      | 0           | 2.031182508 | 13.3928363  | 0           |
| RPL8        | RPL8        | 27330.43549 | 35087.66224 | 30370.48844 |             |
| 27725.45899 |             |             |             |             |             |
| OR1F2P      | OR1F2P      | 4.685485254 | 0           | 42.85707615 | 11.3130507  |
| NUPL2       | NUPL2       | 1656.319037 | 1728.536314 | 1576.78326  |             |
| 1651.705402 |             |             |             |             |             |
| MYCBP2      | MYCBP2      | 3033.851702 | 1741.739001 | 3821.422623 |             |
| 4129.263504 |             |             |             |             |             |
| TEX2        | TEX2        | 1507.55488  | 1715.333628 | 2080.353905 |             |
| 1600.796674 |             |             |             |             |             |
| CCDC37      | CCDC37      | 0           | 0           | 16.07140355 | 4.713771124 |
| C16orf71    | C16orf71    |             |             | 9.370970508 | 15.23386881 |
| 61.60704696 | 18.85508449 |             |             |             |             |
| CTU2        | CTU2        | 1254.538677 | 2041.338421 | 1497.319098 |             |
| 1212.381933 |             |             |             |             |             |
| TPST2       | TPST2       | 4977.156711 | 3954.712343 | 1848.211409 |             |

|              |              |             |             |             |   |             |
|--------------|--------------|-------------|-------------|-------------|---|-------------|
| 2519.039288  |              |             |             |             |   |             |
| MXRA7        | MXRA7        | 674.7098766 | 569.7466935 | 624.9990271 |   |             |
| 567.5380433  |              |             |             |             |   |             |
| RASGRP1      | RASGRP1      | 12848.77194 | 11739.21931 | 9191.057122 |   |             |
| 9879.121521  |              |             |             |             |   |             |
| BEND5        | BEND5        | 153.4496421 | 105.6214904 | 60.71419121 |   |             |
| 87.6761429   |              |             |             |             |   |             |
| OR2M7        | OR2M7        | 0           | 11.60712479 | 0           |   |             |
| CAMLG        | CAMLG        | 969.8954475 | 1321.284222 | 1974.10407  |   |             |
| 1418.845108  |              |             |             |             |   |             |
| CSTB         | CSTB         | 5865.056166 | 7276.711335 | 4618.74281  |   |             |
| 4440.372398  |              |             |             |             |   |             |
| S1PR3        | S1PR3        | 33.96976809 | 10.15591254 | 62.49990271 |   |             |
| 59.39351616  |              |             |             |             |   |             |
| FEM1C        | FEM1C        | 1138.572917 | 778.9584919 | 1633.926028 |   |             |
| 1525.376336  |              |             |             |             |   |             |
| LXN          | LXN          | 1064.776524 | 980.0455602 | 450.8921553 |   |             |
| 868.276641   |              |             |             |             |   |             |
| CCL20        | CCL20        | 292.8428284 | 117.8085855 | 1208.92669  |   |             |
| 1051.170961  |              |             |             |             |   |             |
| COL5A3       | COL5A3       | 108.9375322 | 3.046773762 | 3.571423012 |   |             |
| 57.50800771  |              |             |             |             |   |             |
| LOC102467079 | LOC102467079 |             | 2.342742627 | 0           | 0 | 0           |
| LOC100506258 | LOC100506258 |             | 18.74194102 | 3.046773762 |   | 0           |
|              | 6.599279573  |             |             |             |   |             |
| DGKQ         | DGKQ         | 2354.45634  | 1882.906185 | 2033.03255  |   |             |
| 2217.357937  |              |             |             |             |   |             |
| LNP1         | LNP1         | 94.88107639 | 184.8376082 | 149.1069108 |   |             |
| 98.9891936   |              |             |             |             |   |             |
| CHADL        | CHADL        | 312.7561407 | 514.9047658 | 362.4994357 |   |             |
| 306.395123   |              |             |             |             |   |             |
| SPEF1        | SPEF1        | 1.171371313 | 1.015591254 | 3.571423012 |   |             |
| 1.885508449  |              |             |             |             |   |             |
| SPIN1        | SPIN1        | 2766.779042 | 2740.065203 | 2499.996108 |   |             |
| 2259.781877  |              |             |             |             |   |             |
| SUB1         | SUB1         | 19448.27792 | 17950.57542 | 11649.98187 |   |             |
| 13713.30295  |              |             |             |             |   |             |
| ZBTB5        | ZBTB5        | 409.9799597 | 281.3187774 | 347.3208879 |   |             |
| 296.9675808  |              |             |             |             |   |             |
| KCNK1        | KCNK1        | 213.1895791 | 219.3677109 | 35.71423012 |   |             |
| 54.67974503  |              |             |             |             |   |             |
| AMY2A        | AMY2A        | 0           | 0           | 0.942754225 |   |             |
| FBXW4        | FBXW4        | 302.2137989 | 244.7574922 | 559.8205572 |   |             |
| 494.945968   |              |             |             |             |   |             |
| ATG16L2      | ATG16L2      | 1249.853191 | 935.359545  | 1087.498307 |   |             |
| 1198.24062   |              |             |             |             |   |             |
| MICALL1      | MICALL1      | 804.7320923 | 392.0182241 | 568.7491147 |   |             |
| 555.2822384  |              |             |             |             |   |             |
| WNK3         | WNK3         | 0           | 5.07795627  | 38.39279738 |   | 3.771016899 |
| ARL13A       | ARL13A       | 3.51411394  | 0           | 24.99996108 |   | 8.484788022 |



|                 |             |               |             |   |
|-----------------|-------------|---------------|-------------|---|
| MTRNR2L1        | MTRNR2L1    | 1.171371313   | 42.65483267 |   |
| 116.0712479     | 0.942754225 |               |             |   |
| CNTRL CNTRL     | 6022.019922 | 5108.424008   | 3671.422856 |   |
| 5249.255523     |             |               |             |   |
| SRP14 SRP14     | 20945.29046 | 23752.64825   | 19993.71888 |   |
| 19672.45241     |             |               |             |   |
| ACSM1 ACSM1     | 0 0         | 17.85711506   | 13.19855915 |   |
| NPM3 NPM3       | 222.5605496 | 105.6214904   | 65.17846997 |   |
| 151.7834302     |             |               |             |   |
| FLJ33360        | FLJ33360    | 0 0           | 9.821413283 | 0 |
| PARD6G-AS1      | PARD6G-AS1  | 0 5.07795627  | 0           | 0 |
| LEFTY1 LEFTY1   | 1.171371313 | 0 13.3928363  | 1.885508449 |   |
| HEBP1 HEBP1     | 356.0968793 | 290.4590987   | 448.213588  |   |
| 563.7670264     |             |               |             |   |
| USP12-AS1       | USP12-AS1   | 1.171371313   | 2.031182508 | 0 |
| 0               |             |               |             |   |
| C4orf22 C4orf22 | 0 0         | 2.678567259   | 1.885508449 |   |
| SNTB2 SNTB2     | 1407.988319 | 1114.103606   | 966.9627805 |   |
| 1264.233415     |             |               |             |   |
| PTTG1 PTTG1     | 7779.076893 | 8911.813254   | 2491.067551 |   |
| 3235.532499     |             |               |             |   |
| MIA MIA         | 3.51411394  | 1.015591254   | 2.678567259 |   |
| 4.713771124     |             |               |             |   |
| NBPF4 NBPF4     | 0 0         | 4.464278765   | 0.942754225 |   |
| C11orf65        | C11orf65    | 22.25605496   | 17.26505132 |   |
| 32.14280711     | 37.71016899 |               |             |   |
| NIFK NIFK       | 3374.720754 | 4012.601045   | 4371.421767 |   |
| 4361.181044     |             |               |             |   |
| FAXDC2 FAXDC2   | 24.59879758 | 16.24946006   | 48.21421066 |   |
| 18.85508449     |             |               |             |   |
| C9orf170        | C9orf170    | 1.171371313   | 0 0         |   |
| 3.771016899     |             |               |             |   |
| NLGN2 NLGN2     | 2.342742627 | 0 1.785711506 | 6.599279573 |   |
| LRRC7 LRRC7     | 0 0         | 5.357134518   | 0           |   |
| DCAF15 DCAF15   | 968.7240762 | 447.875743    | 429.4636172 |   |
| 456.2930448     |             |               |             |   |
| SAMD1 SAMD1     | 189.7621528 | 209.2117983   | 116.9641036 |   |
| 180.0660569     |             |               |             |   |
| THAP3 THAP3     | 2469.250729 | 3055.914083   | 2432.139071 |   |
| 2353.114545     |             |               |             |   |
| REEP4 REEP4     | 2864.002861 | 3680.502705   | 1674.104537 |   |
| 2074.059294     |             |               |             |   |
| PNPLA3 PNPLA3   | 2.342742627 | 0 0           | 0           |   |
| C16orf70        | C16orf70    | 1998.359461   | 2192.661517 |   |
| 2049.103953     | 1706.385147 |               |             |   |
| SH3BP5L SH3BP5L | 1272.109246 | 871.377296    | 794.6416202 |   |
| 746.661346      |             |               |             |   |
| PSKH1 PSKH1     | 2557.103577 | 2569.445873   | 2219.639402 |   |
| 2234.327513     |             |               |             |   |
| POMZP3 POMZP3   | 282.3004865 | 127.964498    | 255.3567454 |   |

|                 |                 |             |             |             |             |
|-----------------|-----------------|-------------|-------------|-------------|-------------|
| 271.5132167     |                 |             |             |             |             |
| BTNL3           | BTNL3           | 1.171371313 | 10.15591254 | 0           | 20.74059294 |
| SDK1            | SDK1            | 4.685485254 | 0           | 0           | 14.14131337 |
| POLR2J2         | POLR2J2         | 744.9921554 | 898.7982598 |             | 1108.03399  |
| 884.3034628     |                 |             |             |             |             |
| ANKRD23         | ANKRD23         | 283.4718579 | 148.2763231 |             | 171.4283046 |
| 156.4972013     |                 |             |             |             |             |
| HNRNPAB         | HNRNPAB         | 14493.37726 | 12099.7542  |             | 9742.841977 |
| 9902.690376     |                 |             |             |             |             |
| IFT27           | IFT27           | 730.9356996 | 652.0095851 |             | 340.1780419 |
| 437.4379603     |                 |             |             |             |             |
| VIM             | VIM             | 29620.4664  | 36535.89536 |             | 16569.61706 |
| 16613.21495     |                 |             |             |             |             |
| PLN             | PLN             | 3.51411394  | 8.124730032 |             | 11.60712479 |
| 0.942754225     |                 |             |             |             |             |
| ZBED8           | ZBED8           | 77.31050669 | 95.46557788 |             | 74.99988325 |
| 107.4739816     |                 |             |             |             |             |
| MRPS7           | MRPS7           | 7459.292524 | 10425.04422 |             | 6977.66771  |
| 6971.667492     |                 |             |             |             |             |
| MRPS17          | MRPS17          | 1012.064815 | 1109.025649 |             | 853.5700999 |
| 1020.060071     |                 |             |             |             |             |
| BRAP            | BRAP            | 3511.771198 | 4306.106917 |             | 4420.528833 |
| 3650.344358     |                 |             |             |             |             |
| PRR13           | PRR13           | 11051.88834 | 15039.89088 |             | 11940.15999 |
| 11372.44421     |                 |             |             |             |             |
| MEX3C           | MEX3C           | 1737.143658 | 1560.963757 |             | 1557.140433 |
| 2420.050095     |                 |             |             |             |             |
| TNNC1           | TNNC1           | 7.028227881 | 9.140321286 |             | 16.07140355 |
| 22.62610139     |                 |             |             |             |             |
| CETP            | CETP            | 22.25605496 | 29.45214637 |             | 147.3211993 |
| 76.3630922      |                 |             |             |             |             |
| ERCC6L2         | ERCC6L2         | 1652.804923 | 1754.941687 |             | 3229.459259 |
| 2601.058906     |                 |             |             |             |             |
| NOM03           | NOM03           | 609.113083  | 527.0918609 |             | 398.2136659 |
| 521.3430863     |                 |             |             |             |             |
| MIR6859-1       | MIR6859-1       |             | 11.71371313 |             | 1.015591254 |
| 8.92855753      | 8.484788022     |             |             |             |             |
| MIR6864         | MIR6864         | 3.51411394  | 0           | 4.464278765 | 10.37029647 |
| KIDINS220       | KIDINS220       |             | 4785.051815 |             | 3750.578501 |
| 4721.421222     | 4496.937652     |             |             |             |             |
| HEG1            | HEG1            | 1595.407729 | 459.0472468 |             | 1087.498307 |
| 1532.918369     |                 |             |             |             |             |
| C6orf58         | C6orf58         | 2.342742627 | 0           | 0           | 0.942754225 |
| PHOSPH02-KLHL23 | PHOSPH02-KLHL23 |             | 452.149327  |             | 187.884382  |
| 332.1423401     | 313.9371568     |             |             |             |             |
| HK3             | HK3             | 148.7641568 | 152.3386881 | 0           | 12.25580492 |
| PPP1R14D        | PPP1R14D        |             | 0           | 0           | 5.656525348 |
| PWP1            | PWP1            | 4450.03962  | 5934.099697 |             | 4154.457819 |
| 4211.283122     |                 |             |             |             |             |
| CFH             | CFH             | 152.2782708 | 56.87311023 |             | 306.2495233 |

|                 |              |             |             |             |   |
|-----------------|--------------|-------------|-------------|-------------|---|
| 511.915544      |              |             |             |             |   |
| PROSC PROSC     | 6121.586484  | 8593.933192 | 8086.594555 |             |   |
| 6806.685502     |              |             |             |             |   |
| PRPF3 PRPF3     | 3762.444659  | 4469.617109 | 5865.169442 |             |   |
| 4987.169849     |              |             |             |             |   |
| STX11 STX11     | 4107.999196  | 5180.530987 | 3081.245204 |             |   |
| 3361.861565     |              |             |             |             |   |
| TBC1D12 TBC1D12 | 38.65525334  | 27.42096386 | 29.46423985 |             |   |
| 25.45436407     |              |             |             |             |   |
| CRACR2A CRACR2A | 1251.024563  | 964.8116913 | 741.070275  |             |   |
| 696.6953721     |              |             |             |             |   |
| GVINP1 GVINP1   | 1896.450156  | 969.8896476 | 3781.244114 |             |   |
| 2989.473647     |              |             |             |             |   |
| SNORD78 SNORD78 | 22.25605496  | 17.26505132 | 45.5356434  |             |   |
| 35.82466054     |              |             |             |             |   |
| SNORD77 SNORD77 | 8.199599194  | 8.124730032 | 19.64282657 |             |   |
| 11.3130507      |              |             |             |             |   |
| SNORD76 SNORD76 | 37.48388203  | 36.56128515 | 108.9284019 |             |   |
| 66.93554995     |              |             |             |             |   |
| SNORD75 SNORD75 | 7.028227881  | 3.046773762 | 8.035701777 |             |   |
| 6.599279573     |              |             |             |             |   |
| SNORD80 SNORD80 | 117.1371313  | 90.38762161 | 223.2139383 |             |   |
| 192.3218618     |              |             |             |             |   |
| SNORD79 SNORD79 | 46.85485254  | 28.43655511 | 86.60700804 |             |   |
| 63.16453306     |              |             |             |             |   |
| NBEAL2 NBEAL2   | 4602.317891  | 1246.130469 | 523.2134713 |             |   |
| 1234.06528      |              |             |             |             |   |
| LOC101929567    | LOC101929567 | 1.171371313 | 0           | 0           |   |
| 2.828262674     |              |             |             |             |   |
| LOC101929532    | LOC101929532 | 0           | 1.015591254 | 0           | 0 |
| LINC01237       | LINC01237    | 8.199599194 | 4.062365016 |             |   |
| 6.249990271     | 4.713771124  |             |             |             |   |
| STAT4 STAT4     | 4797.9369    | 8724.944464 | 8650.879391 |             |   |
| 7457.185917     |              |             |             |             |   |
| NCKAP1L NCKAP1L | 17085.62198  | 8925.015941 | 5199.991906 |             |   |
| 6618.134658     |              |             |             |             |   |
| RARS RARS       | 6145.01391   | 6976.096324 | 5520.527121 |             |   |
| 5984.603818     |              |             |             |             |   |
| SPEN SPEN       | 4845.963124  | 4697.10955  | 6952.667749 |             |   |
| 6403.186694     |              |             |             |             |   |
| USP31 USP31     | 338.5263096  | 382.8779028 | 324.9994941 |             |   |
| 315.8226653     |              |             |             |             |   |
| SPATA19 SPATA19 | 0            | 0           | 0           | 1.885508449 |   |
| DUSP7 DUSP7     | 520.0888632  | 393.0338153 | 240.1781976 |             |   |
| 345.0480462     |              |             |             |             |   |
| SGCB SGCB       | 2081.526824  | 2152.037867 | 998.2127319 |             |   |
| 1254.805873     |              |             |             |             |   |
| MN1 MN1         | 2.342742627  | 6.093547524 | 0           | 1.885508449 |   |
| DSTN DSTN       | 4817.850212  | 4322.356377 | 3325.88768  |             |   |
| 4070.812742     |              |             |             |             |   |

|              |              |             |             |             |             |
|--------------|--------------|-------------|-------------|-------------|-------------|
| PCCA         | PCCA         | 406.4658458 | 482.4058457 | 285.713841  |             |
| 438.3807145  |              |             |             |             |             |
| KLHL26       | KLHL26       | 513.0606353 | 575.840241  | 632.1418731 |             |
| 602.4199496  |              |             |             |             |             |
| NAP1L5       | NAP1L5       | 264.7299168 | 297.5682374 | 174.9997276 |             |
| 230.9747851  |              |             |             |             |             |
| PRR7-AS1     | PRR7-AS1     |             | 10.54234182 | 6.093547524 |             |
| 7.142846024  | 9.427542247  |             |             |             |             |
| ARIH2        | ARIH2        | 8593.179956 | 10684.01999 | 9000.878846 |             |
| 8566.80764   |              |             |             |             |             |
| ZNF516       | ZNF516       | 90.19559114 | 75.1537528  | 583.0348067 |             |
| 305.4523688  |              |             |             |             |             |
| PDCD6IP      | PDCD6IP      | 8910.621581 | 9505.934138 | 9754.449102 |             |
| 9098.521023  |              |             |             |             |             |
| EFCC1        | EFCC1        | 5.856856567 | 1.015591254 | 8.92855753  |             |
| 11.3130507   |              |             |             |             |             |
| CNTNAP2      | CNTNAP2      | 2.342742627 | 0           | 3.571423012 | 0           |
| ARF3         | ARF3         | 4707.741309 | 2653.739947 | 1430.354916 |             |
| 1523.490827  |              |             |             |             |             |
| CDC14A       | CDC14A       | 1957.361465 | 2009.855092 | 3486.601716 |             |
| 2700.990854  |              |             |             |             |             |
| CLDN5        | CLDN5        | 4.685485254 | 107.6526729 | 11.60712479 |             |
| 16.96957604  |              |             |             |             |             |
| EDEM3        | EDEM3        | 3562.140164 | 2239.378715 | 1989.282618 |             |
| 2414.393569  |              |             |             |             |             |
| EPB41L4B     | EPB41L4B     |             | 42.16936728 | 29.45214637 |             |
| 14.28569205  | 31.11088942  |             |             |             |             |
| ADCK5        | ADCK5        | 766.076839  | 762.7090318 | 585.713374  |             |
| 669.3554995  |              |             |             |             |             |
| TAB2         | TAB2         | 5478.503633 | 4069.474155 | 2503.567531 |             |
| 3648.45885   |              |             |             |             |             |
| KLB          | KLB          | 30.45565415 | 11.17150379 | 10.71426904 | 0           |
| MIR194-2     | MIR194-2     |             | 0           | 1.785711506 | 0           |
| MIR762       | MIR762       | 256.5303176 | 446.8601518 | 251.7853224 |             |
| 235.6885562  |              |             |             |             |             |
| MIR1296      | MIR1296      | 5.856856567 | 4.062365016 | 0.892855753 |             |
| 5.656525348  |              |             |             |             |             |
| MIR320C1     | MIR320C1     |             | 2.342742627 | 1.015591254 |             |
| 4.464278765  | 1.885508449  |             |             |             |             |
| C3orf49      | C3orf49      | 3.51411394  | 6.093547524 | 7.142846024 | 0           |
| MIR186       | MIR186       | 0           | 2.031182508 | 3.571423012 | 6.599279573 |
| LINC00467    | LINC00467    |             | 192.1048954 | 182.8064257 |             |
| 104.4641231  | 152.7261844  |             |             |             |             |
| XPA          | XPA          | 725.078843  | 685.5240965 | 937.4985407 |             |
| 904.1013015  |              |             |             |             |             |
| C1QTNF9B-AS1 | C1QTNF9B-AS1 |             | 44.51210991 | 36.56128515 |             |
| 26.78567259  | 37.71016899  |             |             |             |             |
| KLHL23       | KLHL23       | 399.4376179 | 136.089228  | 224.106794  |             |
| 246.0588527  |              |             |             |             |             |
| B3GALT2      | B3GALT2      | 244.8166045 | 73.12257029 | 52.67848943 |             |

|                  |                  |             |             |             |             |
|------------------|------------------|-------------|-------------|-------------|-------------|
| 473.2626208      |                  |             |             |             |             |
| LSM14A           | LSM14A           | 11089.37222 | 9681.631425 | 11039.26853 |             |
| 10151.57749      |                  |             |             |             |             |
| FTO              | FTO              | 3043.222672 | 3255.98556  | 3059.816666 |             |
| 3038.496866      |                  |             |             |             |             |
| TBC1D3P1-DHX40P1 | TBC1D3P1-DHX40P1 |             |             | 3.51411394  |             |
| 3.046773762      | 7.142846024      |             | 1.885508449 |             |             |
| GRAMD2           | GRAMD2           | 0           | 0           | 40.17850889 | 0           |
| TM4SF1           | TM4SF1           | 0           | 10.15591254 | 25.89281684 | 0           |
| ST8SIA2          | ST8SIA2          | 3.51411394  | 12.18709505 | 0           | 0           |
| EIF3A            | EIF3A            | 18384.67276 | 21126.32927 | 15202.65491 |             |
| 15948.57322      |                  |             |             |             |             |
| RIPK1            | RIPK1            | 3242.355796 | 2919.824855 | 4211.600587 |             |
| 3434.453641      |                  |             |             |             |             |
| RAB11FIP5        | RAB11FIP5        |             | 428.7219007 | 417.4080054 |             |
| 779.4630724      | 892.7882508      |             |             |             |             |
| CAMSAP1          | CAMSAP1          | 960.524477  | 407.2520929 | 395.5350986 |             |
| 592.9924073      |                  |             |             |             |             |
| MBTPS1           | MBTPS1           | 6237.552244 | 6948.67536  | 8010.701816 |             |
| 6916.987747      |                  |             |             |             |             |
| RHOB             | RHOB             | 72.62502143 | 53.82633646 | 70.53560449 |             |
| 28.28262674      |                  |             |             |             |             |
| CALM1            | CALM1            | 42267.76247 | 50140.7558  | 28224.06321 |             |
| 32249.73652      |                  |             |             |             |             |
| TAT              | TAT              | 0           | 3.046773762 | 9.821413283 | 3.771016899 |
| FABP2            | FABP2            | 1.171371313 | 0           | 0           | 0           |
| CRIPT            | CRIPT            | 1454.843171 | 1179.101446 | 1249.998054 |             |
| 1317.970406      |                  |             |             |             |             |
| ABCB11           | ABCB11           | 0           | 0           | 0           | 0.942754225 |
| DMP1             | DMP1             | 0           | 0           | 0.892855753 | 0           |
| ITPRIPL2         | ITPRIPL2         |             | 433.407386  | 395.0649978 |             |
| 241.0710533      | 281.8835132      |             |             |             |             |
| LOC102723385     | LOC102723385     |             | 50.36896648 | 67.02902277 |             |
| 58.03562395      | 56.56525348      |             |             |             |             |
| MIR1277          | MIR1277          | 1.171371313 | 0           | 0           | 2.828262674 |
| MIR548H4         | MIR548H4         |             | 1.171371313 | 0           | 2.678567259 |
|                  | 0.942754225      |             |             |             |             |
| THUMPD2          | THUMPD2          | 629.0263953 | 600.2144311 | 437.499319  |             |
| 526.9996116      |                  |             |             |             |             |
| REEP2            | REEP2            | 148.7641568 | 97.49676039 | 24.10710533 |             |
| 82.96237177      |                  |             |             |             |             |
| FAM212B-AS1      | FAM212B-AS1      |             | 4.685485254 | 2.031182508 |             |
| 5.357134518      | 0                |             |             |             |             |
| RRS1-AS1         | RRS1-AS1         |             | 12.88508445 | 6.093547524 |             |
| 5.357134518      | 11.3130507       |             |             |             |             |
| ISPD-AS1         | ISPD-AS1         |             | 0           | 1.015591254 | 0.892855753 |
| 0                |                  |             |             |             |             |
| FLJ33534         | FLJ33534         |             | 1.171371313 | 0           | 0           |
| 6.599279573      |                  |             |             |             |             |
| ADD3-AS1         | ADD3-AS1         |             | 339.6976809 | 284.3655511 |             |

|              |              |             |             |             |             |
|--------------|--------------|-------------|-------------|-------------|-------------|
| 309.8209463  | 323.3646991  |             |             |             |             |
| LOC100128531 | LOC100128531 | 2.342742627 |             | 1.015591254 |             |
| 0.892855753  | 0            |             |             |             |             |
| SH3PXD2A-AS1 | SH3PXD2A-AS1 | 56.22582305 |             | 100.5435342 |             |
| 5.357134518  | 11.3130507   |             |             |             |             |
| LOC100507424 | LOC100507424 | 1649.290809 |             | 1310.112718 |             |
| 463.3921358  | 822.081684   |             |             |             |             |
| LINC00838    | LINC00838    | 0           | 0           | 6.249990271 | 0           |
| LOC283214    | LOC283214    | 1.171371313 |             | 0           | 0           |
| LOC100131289 | LOC100131289 | 76.13913537 |             | 67.02902277 |             |
| 80.35701777  | 65.99279573  |             |             |             |             |
| LOC728175    | LOC728175    | 9.370970508 |             | 5.07795627  | 0           |
|              | 0.942754225  |             |             |             |             |
| LOC399715    | LOC399715    | 7.028227881 |             | 10.15591254 |             |
| 46.42849916  | 60.33627038  |             |             |             |             |
| OR51B5       | OR51B5       | 0           | 0           | 6.249990271 | 0           |
| LOC100130992 | LOC100130992 | 125.3367305 |             | 77.18493531 |             |
| 221.4282268  | 318.650928   |             |             |             |             |
| LOC100506123 | LOC100506123 | 12.88508445 |             | 22.34300759 | 0           |
|              | 2.828262674  |             |             |             |             |
| LOC152578    | LOC152578    | 1.171371313 |             | 0           | 1.785711506 |
|              | 1.885508449  |             |             |             |             |
| LINC00862    | LINC00862    | 0           | 8.124730032 | 0           | 0           |
| UNC13C       | UNC13C       | 0           | 29.45214637 | 4.464278765 | 0           |
| NACC2        | NACC2        | 119.479874  |             | 93.43439537 | 211.6068135 |
| 267.7421998  |              |             |             |             |             |
| AKAP11       | AKAP11       | 1542.69602  |             | 2453.66847  | 1195.533853 |
| 1131.30507   |              |             |             |             |             |
| IMPG2        | IMPG2        | 1.171371313 |             | 2.031182508 | 0           |
| ZNF208       | ZNF208       | 2.342742627 |             | 8.124730032 | 13.19855915 |
| 97.10368515  |              |             |             |             | 84.82129654 |
| ZNF184       | ZNF184       | 1279.137474 |             | 1575.182035 | 2165.175201 |
| 2092.914379  |              |             |             |             |             |
| AARS         | AARS         | 14911.55682 |             | 17682.45932 | 29554.41828 |
| 21985.97127  |              |             |             |             |             |
| DMGDH        | DMGDH        | 1.171371313 |             | 0           | 64.28561422 |
| ZSCAN5A      | ZSCAN5A      | 250.6734611 |             | 368.6596252 | 22.62610139 |
| 269.6277083  |              |             |             |             | 354.463734  |
| OXT          | OXT          | 21.08468364 |             | 30.46773762 | 27.67852834 |
| 55.62249926  |              |             |             |             |             |
| OPRK1        | OPRK1        | 0           | 1.015591254 | 0           | 0           |
| RPS15        | RPS15        | 13921.74806 |             | 16396.7208  | 16475.86721 |
| 13798.15083  |              |             |             |             |             |
| OXT          | OXT          | 10.54234182 |             | 34.53010264 | 0           |
| PIK3R3       | PIK3R3       | 579.8288002 |             | 459.0472468 | 24.51160984 |
| 258.3146576  |              |             |             |             | 230.3567843 |
| THOC6        | THOC6        | 4056.458859 |             | 4663.595039 | 2888.388361 |
| 2888.598945  |              |             |             |             |             |
| SNORA51      | SNORA51      | 58.56856567 |             | 57.88870148 | 159.8211798 |
| 98.9891936   |              |             |             |             |             |

|             |             |             |             |             |             |
|-------------|-------------|-------------|-------------|-------------|-------------|
| RIPK3       | RIPK3       | 1311.935871 | 1250.192834 | 1053.569789 |             |
| 1006.861512 |             |             |             |             |             |
| UFL1        | UFL1        | 2777.321384 | 2442.496966 | 3182.137904 |             |
| 3251.559321 |             |             |             |             |             |
| CREB1       | CREB1       | 4910.388546 | 4636.174075 | 4557.135763 |             |
| 5270.93887  |             |             |             |             |             |
| OSCP1       | OSCP1       | 55.05445173 | 48.74838019 | 47.32135491 |             |
| 39.59567744 |             |             |             |             |             |
| FGD5P1      | FGD5P1      | 0           | 0           | 11.60712479 | 0           |
| BCAS3       | BCAS3       | 1211.197938 | 906.9229899 | 986.6056071 |             |
| 1171.843501 |             |             |             |             |             |
| LOC285740   | LOC285740   |             | 105.4234182 | 67.02902277 |             |
| 82.14272928 | 78.24860065 |             |             |             |             |
| CNTF        | CNTF        | 36.31251072 | 31.48332888 | 66.07132572 |             |
| 43.36669434 |             |             |             |             |             |
| NUPR1L      | NUPR1L      | 0           | 0           | 10.71426904 | 0           |
| SUPT20HL1   | SUPT20HL1   |             | 0           | 1.015591254 | 0           |
| HS3ST3B1    | HS3ST3B1    |             | 1434.929859 | 1286.754119 | 0           |
| 175.8925833 | 462.8923243 |             |             |             |             |
| EPHA3       | EPHA3       | 0           | 0           | 0.892855753 | 0           |
| ASCL2       | ASCL2       | 14.05645576 | 14.21827756 | 9.821413283 |             |
| 30.16813519 |             |             |             |             |             |
| GZMA        | GZMA        | 6891.177437 | 3853.153218 | 1478.569127 |             |
| 3562.668215 |             |             |             |             |             |
| KIAA0355    | KIAA0355    |             | 486.1190951 | 333.1139313 |             |
| 1160.712479 | 853.1925734 |             |             |             |             |
| SPATA6      | SPATA6      | 5.856856567 | 4.062365016 | 66.96418148 |             |
| 51.85148236 |             |             |             |             |             |
| LPIN2       | LPIN2       | 4863.533693 | 2709.597466 | 9981.234463 |             |
| 9583.096694 |             |             |             |             |             |
| MEDAG       | MEDAG       | 1.171371313 | 0           | 0.892855753 | 0           |
| SPC25       | SPC25       | 1971.417921 | 2529.837814 | 1158.033912 |             |
| 1635.67858  |             |             |             |             |             |
| TMEM194B    | TMEM194B    |             | 2231.462352 | 978.0143777 |             |
| 814.2844468 | 1530.090107 |             |             |             |             |
| TMEM194A    | TMEM194A    |             | 4284.876265 | 2967.557644 |             |
| 4794.635394 | 4976.799552 |             |             |             |             |
| ABI3        | ABI3        | 6591.306381 | 8819.39445  | 2549.103175 |             |
| 3712.566137 |             |             |             |             |             |
| CCDC102B    | CCDC102B    |             | 28.11291152 | 29.45214637 |             |
| 65.17846997 | 73.53482953 |             |             |             |             |
| MGLL        | MGLL        | 77.31050669 | 102.5747167 | 85.71415229 |             |
| 162.1537267 |             |             |             |             |             |
| EBF4        | EBF4        | 0           | 0           | 14.28569205 | 16.96957604 |
| MTMR11      | MTMR11      | 210.8468364 | 542.3257297 | 39.28565313 |             |
| 99.93194782 |             |             |             |             |             |
| CBR3        | CBR3        | 1849.595304 | 2737.01843  | 1610.711778 |             |
| 1478.238624 |             |             |             |             |             |
| ZDHHC5      | ZDHHC5      | 8589.665842 | 10086.85234 | 8833.91482  |             |
| 8166.137094 |             |             |             |             |             |

|              |              |             |             |             |             |  |
|--------------|--------------|-------------|-------------|-------------|-------------|--|
| HEYL         | HEYL         | 0           | 2.031182508 | 24.99996108 | 3.771016899 |  |
| CRACR2B      | CRACR2B      | 73.79639275 | 95.46557788 | 5.357134518 |             |  |
| 18.85508449  |              |             |             |             |             |  |
| TMEM59L      | TMEM59L      | 0           | 2.031182508 | 0           | 10.37029647 |  |
| STAP1        | STAP1        | 1996.016718 | 1957.044347 | 576.7848165 |             |  |
| 732.5200326  |              |             |             |             |             |  |
| STK32B       | STK32B       | 7.028227881 | 1.015591254 | 0           | 0           |  |
| CFL1P1       | CFL1P1       | 10.54234182 | 14.21827756 | 57.14276819 |             |  |
| 44.30944856  |              |             |             |             |             |  |
| LOC100132891 | LOC100132891 | 496.6614369 |             | 111.7150379 |             |  |
| 167.8568816  | 443.0944856  |             |             |             |             |  |
| CAPN11       | CAPN11       | 0           | 18.28064257 | 0           | 0           |  |
| CWC15        | CWC15        | 2999.881934 | 3956.743526 | 3626.780069 |             |  |
| 3315.666608  |              |             |             |             |             |  |
| NDUFA4L2     | NDUFA4L2     | 29.28428284 |             | 26.40537261 |             |  |
| 116.9641036  | 80.1341091   |             |             |             |             |  |
| SPDYE5       | SPDYE5       | 31.62702546 | 10.15591254 | 44.64278765 |             |  |
| 47.13771124  |              |             |             |             |             |  |
| DCDC2B       | DCDC2B       | 83.16736326 | 50.7795627  | 102.6784116 |             |  |
| 126.3290661  |              |             |             |             |             |  |
| RGPD6        | RGPD6        | 1.171371313 | 2.031182508 | 8.92855753  |             |  |
| 5.656525348  |              |             |             |             |             |  |
| LINC00925    | LINC00925    | 1.171371313 |             | 6.093547524 |             |  |
| 100.8927001  | 140.4703795  |             |             |             |             |  |
| C10orf76     | C10orf76     | 2883.916174 |             | 2568.430281 |             |  |
| 2436.60335   | 1942.073703  |             |             |             |             |  |
| ZNF426       | ZNF426       | 1030.806756 | 1080.589094 | 1757.140122 |             |  |
| 1211.439179  |              |             |             |             |             |  |
| KLHL12       | KLHL12       | 4902.188947 | 4852.495012 | 4205.350597 |             |  |
| 5116.327178  |              |             |             |             |             |  |
| ZNF350       | ZNF350       | 732.1070709 | 828.7224633 | 2529.460348 |             |  |
| 1771.435188  |              |             |             |             |             |  |
| LOC101928891 | LOC101928891 | 2.342742627 |             | 1.015591254 | 0           |  |
| 0.942754225  |              |             |             |             |             |  |
| ZMYND10      | ZMYND10      | 63.25405093 | 77.18493531 | 29.46423985 |             |  |
| 35.82466054  |              |             |             |             |             |  |
| ATAD2B       | ATAD2B       | 1427.901631 | 998.3262027 | 1358.0336   |             |  |
| 1579.113326  |              |             |             |             |             |  |
| COQ3         | COQ3         | 1267.423761 | 1588.384721 | 569.6419704 |             |  |
| 793.7990572  |              |             |             |             |             |  |
| PLEKHG2      | PLEKHG2      | 1095.232178 | 541.3101384 | 219.6425152 |             |  |
| 469.4916039  |              |             |             |             |             |  |
| AG01         | AG01         | 2472.764843 | 1353.783142 | 1061.60549  |             |  |
| 1356.623329  |              |             |             |             |             |  |
| GABARAPL1    | GABARAPL1    | 800.0466071 |             | 1177.070263 |             |  |
| 3003.566753  | 1465.040065  |             |             |             |             |  |
| C16orf52     | C16orf52     | 142.9073002 |             | 24.3741901  |             |  |
| 35.71423012  | 92.38991402  |             |             |             |             |  |
| GDE1         | GDE1         | 5018.154707 | 5028.192299 | 2418.746235 |             |  |
| 2356.885562  |              |             |             |             |             |  |



|             |             |             |             |             |             |
|-------------|-------------|-------------|-------------|-------------|-------------|
| AHSP        | AHSP        | 0           | 1.015591254 | 0           | 0           |
| CCDC39      | CCDC39      | 4.685485254 | 4.062365016 | 18.74997081 |             |
| 16.96957604 |             |             |             |             |             |
| MLLT4       | MLLT4       | 491.9759517 | 811.457412  | 365.178003  |             |
| 378.9871983 |             |             |             |             |             |
| FAM19A1     | FAM19A1     | 19.91331233 | 13.2026863  | 8.035701777 |             |
| 18.85508449 |             |             |             |             |             |
| SFXN1       | SFXN1       | 13717.92945 | 14529.04848 | 9092.842989 |             |
| 11732.57633 |             |             |             |             |             |
| F11R        | F11R        | 648.9397077 | 1146.602526 | 2765.174267 |             |
| 1462.211803 |             |             |             |             |             |
| C11orf1     | C11orf1     | 590.371142  | 550.4504597 | 774.1059379 |             |
| 734.4055411 |             |             |             |             |             |
| C20orf195   | C20orf195   | 0           | 6.093547524 | 6.249990271 |             |
| 5.656525348 |             |             |             |             |             |
| PFKP        | PFKP        | 13288.03618 | 16298.20845 | 6488.382757 |             |
| 9638.719193 |             |             |             |             |             |
| COX17       | COX17       | 3866.696706 | 3472.306498 | 2893.745496 |             |
| 3223.276694 |             |             |             |             |             |
| HOXA11      | HOXA11      | 0           | 0           | 6.599279573 |             |
| HOXA1       | HOXA1       | 31.62702546 | 24.3741901  | 7.142846024 |             |
| 28.28262674 |             |             |             |             |             |
| HMGB1       | HMGB1       | 40228.40502 | 41168.00707 | 25676.74575 |             |
| 30230.35697 |             |             |             |             |             |
| CCAR1       | CCAR1       | 9249.147891 | 10732.76837 | 6537.489824 |             |
| 8809.095476 |             |             |             |             |             |
| SCARNA18    | SCARNA18    | 2.342742627 | 3.046773762 |             |             |
| 6.249990271 | 2.828262674 |             |             |             |             |
| GBP1P1      | GBP1P1      | 22.25605496 | 34.53010264 | 970.5342035 |             |
| 1007.804266 |             |             |             |             |             |
| SCARNA1     | SCARNA1     | 21.08468364 | 17.26505132 | 23.21424958 |             |
| 24.51160984 |             |             |             |             |             |
| SNORA36B    | SNORA36B    | 1.171371313 | 0           | 0           | 0           |
| SNORA81     | SNORA81     | 81.99599194 | 53.82633646 | 127.6783727 |             |
| 152.7261844 |             |             |             |             |             |
| SNORD50A    | SNORD50A    | 9.370970508 | 11.17150379 |             |             |
| 33.03566286 | 37.71016899 |             |             |             |             |
| SNORA76A    | SNORA76A    | 3.51411394  | 4.062365016 |             |             |
| 4.464278765 | 9.427542247 |             |             |             |             |
| SNORA55     | SNORA55     | 0           | 2.031182508 | 2.678567259 | 9.427542247 |
| SNORA60     | SNORA60     | 4.685485254 | 5.07795627  | 23.21424958 |             |
| 20.74059294 |             |             |             |             |             |
| SNORA74B    | SNORA74B    | 4.685485254 | 3.046773762 |             |             |
| 8.92855753  | 5.656525348 |             |             |             |             |
| SNORA61     | SNORA61     | 44.51210991 | 28.43655511 | 62.49990271 |             |
| 55.62249926 |             |             |             |             |             |
| SNORD56     | SNORD56     | 31.62702546 | 19.29623383 | 58.03562395 |             |
| 30.16813519 |             |             |             |             |             |
| SNORD57     | SNORD57     | 40.99799597 | 40.62365016 | 103.5712674 |             |
| 60.33627038 |             |             |             |             |             |

|             |             |             |             |             |             |
|-------------|-------------|-------------|-------------|-------------|-------------|
| SNORA46     | SNORA46     | 1.171371313 | 2.031182508 | 0           | 0           |
| SNORA45B    | SNORA45B    |             | 23.42742627 | 23.35859884 |             |
| 39.28565313 | 18.85508449 |             |             |             |             |
| SNORD61     | SNORD61     | 7.028227881 | 0           | 8.035701777 | 11.3130507  |
| SNORA44     | SNORA44     | 22.25605496 | 14.21827756 | 44.64278765 |             |
| 56.56525348 |             |             |             |             |             |
| PIF1        | PIF1        | 1664.518636 | 1167.929942 | 215.1782365 |             |
| 502.4880018 |             |             |             |             |             |
| FAM188A     | FAM188A     | 848.0728309 | 1208.553592 | 773.2130821 |             |
| 704.2374059 |             |             |             |             |             |
| MEIG1       | MEIG1       | 59.73993699 | 43.67042392 | 31.24995136 |             |
| 10.37029647 |             |             |             |             |             |
| NMRAL1      | NMRAL1      | 1976.103406 | 2495.307711 | 1642.854586 |             |
| 1785.576502 |             |             |             |             |             |
| UPB1        | UPB1        | 0           | 0           | 18.85508449 |             |
| RRP8        | RRP8        | 1526.296821 | 2194.6927   | 2125.889548 |             |
| 1865.710611 |             |             |             |             |             |
| CLK4        | CLK4        | 1125.687832 | 860.2057922 | 3303.566286 |             |
| 2194.731835 |             |             |             |             |             |
| NCK2        | NCK2        | 3336.065501 | 6273.307176 | 7049.09617  |             |
| 6654.902072 |             |             |             |             |             |
| MFSD2B      | MFSD2B      | 1.171371313 | 0           | 0.892855753 | 1.885508449 |
| IGFBPL1     | IGFBPL1     | 4.685485254 | 0           | 0           | 0           |
| B4GALT7     | B4GALT7     | 733.2784422 | 1108.010058 | 1624.104615 |             |
| 1206.725408 |             |             |             |             |             |
| C22orf29    | C22orf29    |             | 1259.224162 | 1322.299813 |             |
| 1592.854663 | 1415.074091 |             |             |             |             |
| SH3RF1      | SH3RF1      | 49.19759517 | 57.88870148 | 3.571423012 |             |
| 22.62610139 |             |             |             |             |             |
| GLIS2       | GLIS2       | 2.342742627 | 0           | 4.464278765 | 0.942754225 |
| ZSCAN25     | ZSCAN25     | 2019.444144 | 1861.578769 | 2283.925016 |             |
| 2087.257854 |             |             |             |             |             |
| IRGM        | IRGM        | 12.88508445 | 20.31182508 | 363.3922915 |             |
| 44.30944856 |             |             |             |             |             |
| ITGB7       | ITGB7       | 24180.61802 | 34260.97096 | 11498.19639 |             |
| 11918.29891 |             |             |             |             |             |
| ADIPOR1     | ADIPOR1     | 11092.88634 | 15526.35909 | 12698.19452 |             |
| 11157.49625 |             |             |             |             |             |
| RFT1        | RFT1        | 3370.035269 | 4538.677314 | 2422.317658 |             |
| 2866.915597 |             |             |             |             |             |
| CREB3L1     | CREB3L1     | 2.342742627 | 13.2026863  | 3.571423012 |             |
| 0.942754225 |             |             |             |             |             |
| RPUSD3      | RPUSD3      | 3672.249068 | 5239.43528  | 3185.709327 |             |
| 3131.829535 |             |             |             |             |             |
| C9orf152    | C9orf152    |             | 0           | 1.015591254 | 0           |
| PAPLN       | PAPLN       | 25.7701689  | 21.32741634 | 51.78563368 | 0           |
| 48.08046546 |             |             |             |             |             |
| SSX7        | SSX7        | 0           | 0           | 0.942754225 |             |
| IL12A       | IL12A       | 248.3307185 | 179.759652  | 22.32139383 |             |
| 22.62610139 |             |             |             |             |             |

|             |          |             |             |             |             |
|-------------|----------|-------------|-------------|-------------|-------------|
| PSMB3       | PSMB3    | 17962.97909 | 25514.69908 | 16257.11755 |             |
| 13389.93825 |          |             |             |             |             |
| PSMC3       | PSMC3    | 15997.41803 | 21129.37604 | 10605.34063 |             |
| 11660.92701 |          |             |             |             |             |
| SMIM12      | SMIM12   | 4387.95694  | 5528.878787 | 4323.207556 |             |
| 4029.331556 |          |             |             |             |             |
| CALM2       | CALM2    | 34714.76025 | 41540.72906 | 37176.72784 |             |
| 38656.69423 |          |             |             |             |             |
| ZNF575      | ZNF575   | 111.2802748 | 93.43439537 | 77.67845051 |             |
| 141.4131337 |          |             |             |             |             |
| MCMDC2      | MCMDC2   | 573.9719436 | 370.6908077 | 2181.246605 |             |
| 1333.997228 |          |             |             |             |             |
| SEMA3G      | SEMA3G   | 101.9093043 | 35.54569389 | 0           | 7.542033798 |
| ESYT3       | ESYT3    | 10.54234182 | 0           | 0           | 11.3130507  |
| C10orf25    | C10orf25 |             | 67.93953618 | 77.18493531 |             |
| 127.6783727 |          | 125.3863119 |             |             |             |
| ENDOG       | ENDOG    | 2354.45634  | 3323.014583 | 2420.531946 |             |
| 2429.477637 |          |             |             |             |             |
| GRAP        | GRAP     | 1704.345261 | 2487.182981 | 3471.423168 |             |
| 2304.091325 |          |             |             |             |             |
| FXR1        | FXR1     | 3396.976809 | 3546.444659 | 3215.173567 |             |
| 3359.033303 |          |             |             |             |             |
| FBX016      | FBX016   | 15.22782708 | 13.2026863  | 1.785711506 | 0           |
| TSKU        | TSKU     | 3.51411394  | 6.093547524 | 10.71426904 |             |
| 21.68334717 |          |             |             |             |             |
| SNORD58A    | SNORD58A |             | 2.342742627 | 8.124730032 |             |
| 60.71419121 |          | 12.25580492 |             |             |             |
| CYS1        | CYS1     | 491.9759517 | 221.3988934 | 16.07140355 |             |
| 197.9783872 |          |             |             |             |             |
| TEX30       | TEX30    | 4266.134324 | 4357.902071 | 2687.495817 |             |
| 2667.051702 |          |             |             |             |             |
| LRRC1       | LRRC1    | 234.2742627 | 274.2096386 | 162.4997471 |             |
| 208.3486837 |          |             |             |             |             |
| LY6G5B      | LY6G5B   | 1.171371313 | 2.031182508 | 2.678567259 |             |
| 5.656525348 |          |             |             |             |             |
| OVOL2       | OVOL2    | 1.171371313 | 0           | 0           | 0           |
| ABHD17C     | ABHD17C  | 271.7581447 | 149.2919143 | 292.856687  |             |
| 344.105292  |          |             |             |             |             |
| UBQLN4      | UBQLN4   | 1363.476209 | 699.742374  | 1077.676894 |             |
| 994.6057071 |          |             |             |             |             |
| ATHL1       | ATHL1    | 1202.998339 | 700.7579653 | 1328.569361 |             |
| 1393.390744 |          |             |             |             |             |
| KIAA0196    | KIAA0196 |             | 7048.141193 | 7367.098957 |             |
| 3968.743822 |          | 5024.880018 |             |             |             |
| RNMT        | RNMT     | 1504.040766 | 1111.056832 | 1674.997393 |             |
| 1888.336712 |          |             |             |             |             |
| CCNE2       | CCNE2    | 5047.43899  | 5793.948104 | 1868.747091 |             |
| 2068.402769 |          |             |             |             |             |
| LRGUK       | LRGUK    | 0           | 1.015591254 | 0.892855753 | 1.885508449 |
| OSM         | OSM      | 2789.035097 | 9663.350782 | 1335.712207 |             |

|              |              |             |             |             |             |
|--------------|--------------|-------------|-------------|-------------|-------------|
| 893.731005   |              |             |             |             |             |
| LINC00563    | LINC00563    |             | 4.685485254 | 0           | 59.82133545 |
|              | 7.542033798  |             |             |             |             |
| C1orf213     | C1orf213     |             | 49.19759517 |             | 48.74838019 |
| 140.1783532  | 83.905126    |             |             |             |             |
| LINC00272    | LINC00272    |             | 0           | 0           | 0.892855753 |
| MIR339       | MIR339       | 0           | 0           |             | 0           |
| LINC01252    | LINC01252    |             | 6.249990271 |             | 1.885508449 |
| 9.821413283  | 8.484788022  |             | 10.54234182 |             | 7.109138778 |
| LYSMD3       | LYSMD3       | 2315.801087 |             |             | 1832.126622 |
| 2104.22743   |              |             |             |             | 2501.78182  |
| LMOD3        | LMOD3        | 7.028227881 |             |             | 2.031182508 |
| 5.656525348  |              |             |             |             | 2.678567259 |
| COL19A1      | COL19A1      | 0           | 4.062365016 | 1.785711506 | 0           |
| GEMIN4       | GEMIN4       | 4257.934724 |             |             | 5115.533147 |
| 4205.626596  |              |             |             |             | 4464.278765 |
| ZNF891       | ZNF891       | 153.4496421 |             |             | 107.6526729 |
| 153.6689386  |              |             |             |             | 374.9994163 |
| CLOCK        | CLOCK        | 578.6574288 |             |             | 520.9983133 |
| 634.4735932  |              |             |             |             | 825.8915716 |
| XCR1         | XCR1         | 3.51411394  |             |             | 1.015591254 |
| 9.427542247  |              |             |             |             | 1.785711506 |
| RSG1         | RSG1         | 142.9073002 |             |             | 129.9956805 |
| 80.1341091   |              |             |             |             | 146.4283435 |
| UFSP1        | UFSP1        | 40.99799597 |             |             | 49.76397145 |
| 75.42033798  |              |             |             |             | 91.96414256 |
| OR4K5        | OR4K5        | 0           | 0           |             | 8.035701777 |
| BTD          | BTD          | 863.300658  |             |             | 1054.183722 |
| 785.3142692  |              |             |             |             | 927.6771274 |
| CDC37L1      | CDC37L1      | 729.7643283 |             |             | 683.492914  |
| 1296.287059  |              |             |             |             | 1737.497295 |
| METTL25      | METTL25      | 514.2320066 |             |             | 513.8891745 |
| 567.5380433  |              |             |             |             | 557.1419899 |
| TDRD12       | TDRD12       | 2.342742627 |             |             | 10.15591254 |
| NSMAF        | NSMAF        | 5410.564097 |             |             | 5668.014789 |
| 5539.623824  |              |             |             |             | 4435.707381 |
| LGALS3BP     | LGALS3BP     |             |             |             | 4150.168564 |
| 12798.19436  | 7960.616673  |             |             |             | 9114.931505 |
| LOC100507431 | LOC100507431 |             | 0           | 0           | 1.785711506 |
| 0.942754225  |              |             |             |             |             |
| MPP6         | MPP6         | 374.8388203 |             |             | 534.2009996 |
| 372.3879188  |              |             |             |             | 489.2849527 |
| TSC22D4      | TSC22D4      | 2051.07117  |             |             | 1233.943374 |
| 1111.507231  |              |             |             |             | 1108.926845 |
| LOC101927415 | LOC101927415 |             |             |             | 31.62702546 |
| 41.07136464  | 71.64932108  |             |             |             | 2.031182508 |
| DUPD1        | DUPD1        | 2.342742627 |             |             | 8.124730032 |
| 10.37029647  |              |             |             |             | 4.464278765 |
| C4orf47      | C4orf47      | 0           | 0           |             | 1.885508449 |
| OIP5         | OIP5         | 2092.069166 |             |             | 2131.726042 |
|              |              |             |             |             | 680.3560838 |

|             |             |             |             |             |             |
|-------------|-------------|-------------|-------------|-------------|-------------|
| 1019.117317 |             |             |             |             |             |
| ATP6V0A2    | ATP6V0A2    |             | 5039.239391 |             | 5076.940679 |
| 4628.564224 | 4799.561758 |             |             |             |             |
| CKMT1A      | CKMT1A      | 0           | 1.015591254 | 0           | 0           |
| FAM168B     | FAM168B     | 5827.572284 | 4212.672522 |             | 5674.098311 |
| 4666.633412 |             |             |             |             |             |
| FLG2        | FLG2        | 0           | 0           | 0.892855753 | 0           |
| LRR4B       | LRR4B       | 1.171371313 | 2.031182508 |             | 0           |
| ZSCAN5B     | ZSCAN5B     | 1.171371313 | 5.07795627  |             | 4.464278765 |
| 0.942754225 |             |             |             |             |             |
| FAM132A     | FAM132A     | 2.342742627 | 0           | 0           | 2.828262674 |
| KIF4B       | KIF4B       | 7.028227881 | 5.07795627  |             | 1.785711506 |
| 0.942754225 |             |             |             |             |             |
| RPS6KL1     | RPS6KL1     | 125.3367305 | 116.7929942 |             | 101.7855558 |
| 42.42394011 |             |             |             |             |             |
| CTF1        | CTF1        | 17.5705697  | 13.2026863  |             | 33.92851862 |
| 12.25580492 |             |             |             |             |             |
| CREBL2      | CREBL2      | 3263.440479 | 2589.757698 |             | 3081.245204 |
| 3582.466054 |             |             |             |             |             |
| CPN1        | CPN1        | 0           | 0           | 3.571423012 | 0           |
| HSD17B6     | HSD17B6     | 113.6230174 | 106.6370817 |             | 64.28561422 |
| 93.33266825 |             |             |             |             |             |
| HSPH1       | HSPH1       | 14116.1957  | 16899.43847 |             | 17924.9721  |
| 16380.35465 |             |             |             |             |             |
| FBP2        | FBP2        | 0           | 1.015591254 | 0           | 0.942754225 |
| MAP1LC3B2   | MAP1LC3B2   |             | 59.73993699 |             | 39.60805891 |
| 36.60708587 | 48.08046546 |             |             |             |             |
| MT1A        | MT1A        | 4.685485254 | 6.093547524 |             | 0           |
| AQP6        | AQP6        | 12.88508445 | 13.2026863  |             | 5.656525348 |
| 13.19855915 |             |             |             |             |             |
| CKAP2L      | CKAP2L      | 2954.198453 | 2671.004998 |             | 1133.926806 |
| 1938.302686 |             |             |             |             |             |
| ENTHD1      | ENTHD1      | 8.199599194 | 21.32741634 |             | 19.64282657 |
| 15.0840676  |             |             |             |             |             |
| PXMP2       | PXMP2       | 1219.397537 | 1543.698706 |             | 525.8920385 |
| 610.9047376 |             |             |             |             |             |
| UBXN4       | UBXN4       | 9204.635781 | 9273.363741 |             | 8713.379294 |
| 10700.26045 |             |             |             |             |             |
| TRABD       | TRABD       | 7435.865098 | 7884.034905 |             | 4062.493676 |
| 4594.041337 |             |             |             |             |             |
| OSMR        | OSMR        | 0           | 0           | 9.821413283 | 0           |
| PISD        | PISD        | 2353.284969 | 2531.868996 |             | 3143.745106 |
| 3127.115763 |             |             |             |             |             |
| TMEM50A     | TMEM50A     | 13148.64299 | 16775.53633 |             | 12599.08753 |
| 11816.48145 |             |             |             |             |             |
| ATG2B       | ATG2B       | 1673.889607 | 936.3751362 |             | 1330.355072 |
| 1442.413964 |             |             |             |             |             |
| LOC79999    | LOC79999    |             | 1.171371313 |             | 0           |
|             |             |             |             |             | 2.678567259 |
|             |             |             |             |             |             |
| CDKL4       | CDKL4       | 21.08468364 | 45.70160643 |             | 8.035701777 |

|              |              |             |               |               |
|--------------|--------------|-------------|---------------|---------------|
| 16.02682182  |              |             |               |               |
| KDM4D        | KDM4D        | 121.8226166 | 196.009112    | 215.1782365   |
| 116.9015239  |              |             |               |               |
| METTL24      | METTL24      | 0 0         | 0 9.427542247 |               |
| SYCE2        | SYCE2        | 108.9375322 | 112.7306292   | 56.24991244   |
| 98.04643937  |              |             |               |               |
| MBD2         | MBD2         | 5426.963295 | 6290.572228   | 3415.173255   |
| 4819.359597  |              |             |               |               |
| ZNF772       | ZNF772       | 446.2924704 | 524.0450871   | 562.4991244   |
| 426.1249096  |              |             |               |               |
| CTXN2        | CTXN2        | 2.342742627 | 0 0           | 0             |
| CRYBA1       | CRYBA1       | 0 0         | 0.892855753   | 8.484788022   |
| CHKB         | CHKB         | 3456.716746 | 1876.812637   | 2874.995525   |
| 3206.307118  |              |             |               |               |
| C17orf78     | C17orf78     |             | 7.028227881   | 7.109138778   |
| 14.28569205  | 0.942754225  |             |               |               |
| BICD2        | BICD2        | 2964.740794 | 2844.671103   | 2516.067512   |
| 2529.409585  |              |             |               |               |
| SELK         | SELK         | 4939.672829 | 5825.431433   | 5322.313144   |
| 3953.911218  |              |             |               |               |
| NTN4         | NTN4         | 31.62702546 | 7.109138778   | 43.7499319    |
| 88.61889712  |              |             |               |               |
| PHF11        | PHF11        | 2792.549211 | 2737.01843    | 4076.779368   |
| 4077.412022  |              |             |               |               |
| SKIDA1       | SKIDA1       | 4.685485254 | 0 6.249990271 | 6.599279573   |
| HN1L         | HN1L         | 2151.809103 | 1986.496493   | 1131.248239   |
| 2301.263063  |              |             |               |               |
| FSTL3        | FSTL3        | 78.481878   | 74.13816155   | 372.320849    |
| 186.6653365  |              |             |               |               |
| FRMD4B       | FRMD4B       | 3047.908158 | 3341.295226   | 1438.390618   |
| 3730.478467  |              |             |               |               |
| INTU         | INTU         | 1.171371313 | 8.124730032   | 0 0.942754225 |
| KDELR1       | KDELR1       | 1284.994331 | 1297.925623   | 1020.534126   |
| 930.4984198  |              |             |               |               |
| OAZ3         | OAZ3         | 1273.280618 | 1970.247033   | 1249.105198   |
| 1199.183374  |              |             |               |               |
| GPR55        | GPR55        | 1453.6718   | 763.724623    | 133.0355072   |
| 262.0856745  |              |             |               |               |
| MAPKAPK3     | MAPKAPK3     |             | 9264.375718   | 14792.08662   |
| 6291.954492  | 7734.35566   |             |               |               |
| CD2AP        | CD2AP        | 1033.149498 | 652.0095851   | 1233.033795   |
| 1405.646549  |              |             |               |               |
| TUBE1        | TUBE1        | 1191.284626 | 1208.553592   | 2287.496439   |
| 2259.781877  |              |             |               |               |
| TPX2         | TPX2         | 15343.79284 | 18232.90978   | 5093.742071   |
| 8307.550228  |              |             |               |               |
| CCDC147-AS1  | CCDC147-AS1  |             | 3.51411394    | 0 30.3570956  |
| 46.19495701  |              |             |               |               |
| LOC102577426 | LOC102577426 |             | 0 0           | 5.357134518   |
| 2.828262674  |              |             |               |               |

|                           |             |             |               |   |
|---------------------------|-------------|-------------|---------------|---|
| TYK2 TYK2                 | 11441.95499 | 10495.12002 | 7359.809972   |   |
| 8553.609081               |             |             |               |   |
| RASA3 RASA3               | 7503.804634 | 5444.584713 | 4505.35013    |   |
| 4043.47287                |             |             |               |   |
| RALY RALY                 | 14975.98224 | 18152.67807 | 12418.73067   |   |
| 11585.50667               |             |             |               |   |
| ARHGAP31 ARHGAP31         |             | 440.4356139 | 1152.696073   |   |
| 1121.426826               | 730.6345242 |             |               |   |
| POLR2K POLR2K             | 4582.404578 | 4127.362856 | 4102.672185   |   |
| 4045.358378               |             |             |               |   |
| LOC100506457 LOC100506457 |             | 1.171371313 | 6.093547524   |   |
| 5.357134518               | 14.14131337 |             |               |   |
| FUCA2 FUCA2               | 1506.383509 | 2782.720036 | 1172.319604   |   |
| 1093.594901               |             |             |               |   |
| SCRG1 SCRG1               | 4.685485254 | 1.015591254 | 4.464278765   |   |
| 0.942754225               |             |             |               |   |
| MRPS5 MRPS5               | 3975.634238 | 5618.250817 | 3942.851005   |   |
| 3653.172621               |             |             |               |   |
| SLC35A4 SLC35A4           | 10599.73902 | 13263.62178 | 10277.66257   |   |
| 10325.98702               |             |             |               |   |
| CCDC104 CCDC104           | 784.81878   | 534.2009996 | 925.8914159   |   |
| 1233.122526               |             |             |               |   |
| TSPAN3 TSPAN3             | 1865.994502 | 1987.512084 | 3407.137554   |   |
| 2311.633359               |             |             |               |   |
| GPX7 GPX7                 | 1174.885427 | 1461.435815 | 908.0343008   |   |
| 794.7418114               |             |             |               |   |
| GLB1L2 GLB1L2             | 244.8166045 | 117.8085855 | 190.1782754   |   |
| 179.1233027               |             |             |               |   |
| CLMP CLMP                 | 39.82662466 | 31.48332888 | 71.42846024   |   |
| 67.87830418               |             |             |               |   |
| OR10A2 OR10A2             | 2.342742627 | 0 0         | 0             |   |
| VLDLR VLDLR               | 57.39719436 | 11.17150379 | 93.74985407   |   |
| 63.16453306               |             |             |               |   |
| LINC01506 LINC01506       |             | 2.342742627 | 4.062365016   | 0 |
| 0                         |             |             |               |   |
| DPP9-AS1 DPP9-AS1         |             | 1284.994331 | 1565.026122   |   |
| 1050.891221               | 1035.144139 |             |               |   |
| LOC100287036 LOC100287036 |             | 17.5705697  | 22.34300759   |   |
| 5.357134518               | 14.14131337 |             |               |   |
| REX01 REX01               | 904.298654  | 903.8762161 | 758.9273901   |   |
| 821.1389297               |             |             |               |   |
| DLL4 DLL4                 | 3.51411394  | 0 0         | 2.828262674   |   |
| LOC100270746 LOC100270746 |             | 2.342742627 | 0 0           |   |
| 4.713771124               |             |             |               |   |
| RAB5A RAB5A               | 4548.43481  | 5086.081    | 4179.45778    |   |
| 3945.42643                |             |             |               |   |
| GEMIN8P4 GEMIN8P4         |             | 49.19759517 | 42.65483267   |   |
| 66.07132572               | 11.3130507  |             |               |   |
| LOC285696 LOC285696       |             | 0 0         | 0 0.942754225 |   |
| STX19 STX19               | 3.51411394  | 3.046773762 | 0 0           |   |

|             |             |             |             |             |             |
|-------------|-------------|-------------|-------------|-------------|-------------|
| C8orf82     | C8orf82     | 767.2482103 | 749.5063455 | 748.213121  |             |
| 665.5844826 |             |             |             |             |             |
| DENND6B     | DENND6B     | 115.96576   | 231.5548059 | 117.8569594 |             |
| 109.3594901 |             |             |             |             |             |
| TMEM198     | TMEM198     | 5.856856567 | 1.015591254 | 16.96425931 |             |
| 13.19855915 |             |             |             |             |             |
| MIR1184-1   | MIR1184-1   |             | 391.2380187 | 470.2187506 |             |
| 505.3563562 | 631.6453306 |             |             |             |             |
| MIR3192     | MIR3192     | 2.342742627 | 1.015591254 | 0           | 3.771016899 |
| MIR320E     | MIR320E     | 8.199599194 | 7.109138778 | 7.142846024 |             |
| 6.599279573 |             |             |             |             |             |
| PRPF8       | PRPF8       | 38729.04974 | 24395.51751 | 27505.31433 |             |
| 26209.5102  |             |             |             |             |             |
| MYH7        | MYH7        | 5.856856567 | 13.2026863  | 0           | 8.484788022 |
| POLR2M      | POLR2M      | 3088.906154 | 2770.532941 | 3818.744056 |             |
| 3929.399609 |             |             |             |             |             |
| SPAST       | SPAST       | 2186.950242 | 1576.197626 | 1220.533814 |             |
| 1339.653753 |             |             |             |             |             |
| TRY2P       | TRY2P       | 0           | 26.40537261 | 22.32139383 | 0           |
| DPY19L2P3   | DPY19L2P3   |             | 1.171371313 | 0           | 0.892855753 |
| 13.19855915 |             |             |             |             |             |
| VPS9D1-AS1  | VPS9D1-AS1  |             | 127.6794732 | 107.6526729 |             |
| 113.3926806 | 125.3863119 |             |             |             |             |
| TMEM198B    | TMEM198B    |             | 535.3166903 | 222.4144846 |             |
| 258.9281684 | 296.9675808 |             |             |             |             |
| PCDHGB3     | PCDHGB3     | 0           | 14.21827756 | 9.821413283 | 23.56885562 |
| ACAD11      | ACAD11      | 791.8470079 | 560.6063722 | 974.1056266 |             |
| 936.1549451 |             |             |             |             |             |
| DNAJC30     | DNAJC30     | 541.1735468 | 604.2767962 | 1112.498268 |             |
| 655.2141862 |             |             |             |             |             |
| NRK         | NRK         | 0           | 1.015591254 | 2.678567259 | 0.942754225 |
| FOXK2       | FOXK2       | 1165.514457 | 663.1810889 | 659.8204015 |             |
| 539.2554165 |             |             |             |             |             |
| NBN         | NBN         | 4277.848037 | 3982.133307 | 4130.350714 |             |
| 4465.826762 |             |             |             |             |             |
| AAK1        | AAK1        | 2707.039105 | 1725.489541 | 1676.783104 |             |
| 1972.241838 |             |             |             |             |             |
| GNA14       | GNA14       | 2.342742627 | 1.015591254 | 0           | 3.771016899 |
| ASUN        | ASUN        | 4574.204979 | 5076.940679 | 3081.245204 |             |
| 3903.00249  |             |             |             |             |             |
| DNAJC17     | DNAJC17     | 1137.401545 | 1503.075056 | 1211.605257 |             |
| 1107.736214 |             |             |             |             |             |
| VSTM2B      | VSTM2B      | 2.342742627 | 0           | 0           | 0           |
| NYX         | NYX         | 11.71371313 | 0           | 0           | 0           |
| MAPRE3      | MAPRE3      | 55.05445173 | 34.53010264 | 98.21413283 |             |
| 73.53482953 |             |             |             |             |             |
| RARRES3     | RARRES3     | 4485.180759 | 2392.732995 | 8774.986341 |             |
| 6231.605425 |             |             |             |             |             |
| DUSP19      | DUSP19      | 194.447638  | 72.10697904 | 103.5712674 |             |
| 204.5776668 |             |             |             |             |             |



|                 |             |               |               |  |
|-----------------|-------------|---------------|---------------|--|
| RALGAPA1        | RALGAPA1    | 1648.119438   | 1421.827756   |  |
| 1714.283046     | 1696.01485  |               |               |  |
| C17orf70        | C17orf70    | 2483.307185   | 2585.695333   |  |
| 2516.067512     | 2503.955221 |               |               |  |
| MYL12A MYL12A   | 37496.76712 | 48029.34159   | 27107.10066   |  |
| 31435.19687     |             |               |               |  |
| OSTF1 OSTF1     | 12081.52373 | 9053.99603    | 3995.529495   |  |
| 6603.993344     |             |               |               |  |
| ELL ELL         | 1842.567076 | 2430.309871   | 2137.496673   |  |
| 1952.443999     |             |               |               |  |
| TWSG1 TWSG1     | 454.4920696 | 921.1412674   | 876.7843495   |  |
| 591.1068989     |             |               |               |  |
| ASCL3 ASCL3     | 0 0         | 0 0.942754225 |               |  |
| FSTL4 FSTL4     | 0 0         | 5.357134518   | 24.51160984   |  |
| LINC00899       | LINC00899   | 21.08468364   | 68.04461402   |  |
| 92.85699832     | 56.56525348 |               |               |  |
| GUSBP1 GUSBP1   | 364.2964785 | 470.2187506   | 511.6063465   |  |
| 416.6973673     |             |               |               |  |
| BSN-AS2 BSN-AS2 | 1.171371313 | 0 0           | 0             |  |
| MORC2-AS1       | MORC2-AS1   | 436.9214999   | 171.6349219   |  |
| 273.2138604     | 314.8799111 |               |               |  |
| ANKRD30BP2      | ANKRD30BP2  | 0 0           | 0 2.828262674 |  |
| RPL21P28        | RPL21P28    | 23163.86772   | 24781.44219   |  |
| 41508.86396     | 36569.43638 |               |               |  |
| KLHL22 KLHL22   | 1679.746464 | 2029.151326   | 1258.033756   |  |
| 1330.226211     |             |               |               |  |
| EPHA1-AS1       | EPHA1-AS1   | 0 0           | 21.42853807   |  |
| 19.79783872     |             |               |               |  |
| LINC01116       | LINC01116   | 7.028227881   | 0 0           |  |
| 0.942754225     |             |               |               |  |
| TMLHE-AS1       | TMLHE-AS1   | 8.199599194   | 4.062365016   |  |
| 10.71426904     | 7.542033798 |               |               |  |
| LINC00892       | LINC00892   | 1316.621356   | 2335.859884   |  |
| 816.963014      | 1077.568079 |               |               |  |
| LOC284865       | LOC284865   | 0 0           | 13.3928363 0  |  |
| TOB1-AS1        | TOB1-AS1    | 66.76816487   | 53.82633646   |  |
| 75.89273901     | 89.56165135 |               |               |  |
| MIR4446 MIR4446 | 2.342742627 | 3.046773762   | 1.785711506   |  |
| 6.599279573     |             |               |               |  |
| UBL7-AS1        | UBL7-AS1    | 568.115087    | 509.8268095   |  |
| 361.60658       | 507.2017729 |               |               |  |
| SLC8A1-AS1      | SLC8A1-AS1  | 230.7601488   | 169.6037394   |  |
| 16.07140355     | 65.99279573 |               |               |  |
| LOC286437       | LOC286437   | 28.11291152   | 27.42096386   |  |
| 24.10710533     | 45.25220279 |               |               |  |
| LINC00629       | LINC00629   | 4.685485254   | 4.062365016   |  |
| 7.142846024     | 0.942754225 |               |               |  |
| EHHADH-AS1      | EHHADH-AS1  | 36.31251072   | 27.42096386   |  |
| 15.1785478      | 26.39711829 |               |               |  |
| RNASEH1-AS1     | RNASEH1-AS1 | 303.3851702   | 362.5660777   |  |

|                   |               |             |               |   |  |
|-------------------|---------------|-------------|---------------|---|--|
| 374.1065605       | 284.7117759   |             |               |   |  |
| ABCC2 ABCC2       | 15.22782708   | 15.23386881 | 162.4997471   |   |  |
| 82.01961755       |               |             |               |   |  |
| HSF1 HSF1         | 2189.292985   | 1579.2444   | 1394.640686   |   |  |
| 1222.752229       |               |             |               |   |  |
| ANKRD9 ANKRD9     | 255.3589463   | 299.5994199 | 178.5711506   |   |  |
| 166.8674978       |               |             |               |   |  |
| IFNGR1 IFNGR1     | 1761.742455   | 1731.583088 | 3379.459025   |   |  |
| 3155.39839        |               |             |               |   |  |
| GPR137B GPR137B   | 552.88726     | 493.5773495 | 639.2847192   |   |  |
| 805.1121079       |               |             |               |   |  |
| ID3 ID3           | 927.7260803   | 1086.682642 | 1131.248239   |   |  |
| 1366.050872       |               |             |               |   |  |
| ID2 ID2           | 7062.197649   | 6340.336199 | 6248.20456    |   |  |
| 9167.342081       |               |             |               |   |  |
| ID01 ID01         | 3.51411394    | 2.031182508 | 276.7852834   |   |  |
| 401.6132997       |               |             |               |   |  |
| IRF8 IRF8         | 327.9839678   | 490.5305757 | 3067.852367   |   |  |
| 2288.064503       |               |             |               |   |  |
| ICAM3 ICAM3       | 7311.699739   | 7928.72092  | 4992.849371   |   |  |
| 5439.691877       |               |             |               |   |  |
| PPIC PPIC         | 3.51411394    | 8.124730032 | 3.571423012   | 0 |  |
| SIM1 SIM1         | 5.856856567   | 13.2026863  | 4.464278765   | 0 |  |
| MORN3 MORN3       | 87.85284851   | 109.6838554 | 253.5710339   |   |  |
| 213.0624548       |               |             |               |   |  |
| ATXN7L3 ATXN7L3   | 2083.869567   | 854.1122447 | 927.6771274   |   |  |
| 964.4375719       |               |             |               |   |  |
| TRAPPC2L TRAPPC2L |               | 3037.365816 | 4132.440813   |   |  |
| 3161.602221       | 2691.563312   |             |               |   |  |
| SCN4A SCN4A       | 4.685485254   | 3.046773762 | 2.678567259   |   |  |
| 2.828262674       |               |             |               |   |  |
| BOP1 BOP1         | 4882.275635   | 8080.044017 | 3754.458441   |   |  |
| 4595.926845       |               |             |               |   |  |
| SLC22A13 SLC22A13 |               | 5.856856567 | 1.015591254   | 0 |  |
| 0                 |               |             |               |   |  |
| POLD3 POLD3       | 4363.358143   | 4378.213896 | 2670.531557   |   |  |
| 3075.264281       |               |             |               |   |  |
| PCDHGC3 PCDHGC3   | 0 15.23386881 | 17.85711506 | 12.25580492   |   |  |
| CNOT6L CNOT6L     | 3023.30936    | 1588.384721 | 1957.139811   |   |  |
| 3263.815126       |               |             |               |   |  |
| RBM42 RBM42       | 5888.483593   | 7259.446284 | 4423.207401   |   |  |
| 3865.292321       |               |             |               |   |  |
| NAV1 NAV1         | 59.73993699   | 38.59246765 | 241.9639091   |   |  |
| 84.84788022       |               |             |               |   |  |
| GGT7 GGT7         | 66.76816487   | 49.76397145 | 623.2133156   |   |  |
| 528.8851201       |               |             |               |   |  |
| GPR114 GPR114     | 2558.274949   | 1833.142214 | 810.7130238   |   |  |
| 1505.578497       |               |             |               |   |  |
| CREG2 CREG2       | 57.39719436   | 13.2026863  | 0 0.942754225 |   |  |
| TTL TTL           | 2473.936214   | 2440.465783 | 1664.283124   |   |  |

|              |              |             |             |             |             |
|--------------|--------------|-------------|-------------|-------------|-------------|
| 2020.322304  |              |             |             |             |             |
| SPICE1       | SPICE1       | 826.9881473 | 898.7982598 | 694.6417759 |             |
| 988.0064275  |              |             |             |             |             |
| SNORD87      | SNORD87      | 23.42742627 | 11.17150379 | 45.5356434  |             |
| 72.5920753   |              |             |             |             |             |
| FLJ44313     | FLJ44313     |             | 0           | 0           | 1.885508449 |
| RNA45S5      | RNA45S5      | 431414.8834 | 14584.906   | 36227.62218 |             |
| 32508.05118  |              |             |             |             |             |
| ZNF106       | ZNF106       | 7022.371024 | 5825.431433 | 4509.814409 |             |
| 5385.012132  |              |             |             |             |             |
| PDCD11       | PDCD11       | 4589.432806 | 3846.044079 | 3358.030487 |             |
| 3859.635796  |              |             |             |             |             |
| SGTB         | SGTB         | 1104.603149 | 1108.010058 | 1586.604673 |             |
| 1527.261844  |              |             |             |             |             |
| HIST1H2AB    | HIST1H2AB    |             | 19.91331233 | 2.031182508 | 0           |
| 7.542033798  |              |             |             |             |             |
| HIST1H2AC    | HIST1H2AC    |             | 424.0364155 | 773.8805356 |             |
| 391.0708198  | 358.2466054  |             |             |             |             |
| ARL6IP5      | ARL6IP5      | 19643.89693 | 23852.17619 | 18275.86441 |             |
| 17538.05684  |              |             |             |             |             |
| NUP93        | NUP93        | 8860.252615 | 11961.63379 | 8046.416046 |             |
| 8023.781207  |              |             |             |             |             |
| ZNF548       | ZNF548       | 901.9559114 | 637.7913075 | 1562.497568 |             |
| 1214.267441  |              |             |             |             |             |
| STAU1        | STAU1        | 5647.181102 | 5696.451344 | 5379.455912 |             |
| 6481.435295  |              |             |             |             |             |
| PGP          | PGP          | 2532.50478  | 3694.720982 | 2074.103914 |             |
| 1903.42078   |              |             |             |             |             |
| ZNF486       | ZNF486       | 233.1028914 | 190.9311558 | 424.1064827 |             |
| 341.2770293  |              |             |             |             |             |
| RCSD1        | RCSD1        | 16994.25502 | 20577.90999 | 7608.916727 |             |
| 9060.810854  |              |             |             |             |             |
| NTNG2        | NTNG2        | 108.9375322 | 200.071477  | 35.71423012 |             |
| 54.67974503  |              |             |             |             |             |
| ACOT13       | ACOT13       | 2596.930202 | 2595.851245 | 2302.674987 |             |
| 2246.583317  |              |             |             |             |             |
| LOC100289333 | LOC100289333 |             | 0           | 1.015591254 | 22.32139383 |
| 1.885508449  |              |             |             |             |             |
| LOC102546294 | LOC102546294 |             | 3.51411394  | 7.109138778 |             |
| 16.07140355  | 43.36669434  |             |             |             |             |
| LOC100506142 | LOC100506142 |             | 5.856856567 | 2.031182508 |             |
| 10.71426904  | 2.828262674  |             |             |             |             |
| ERGIC2       | ERGIC2       | 3706.218836 | 3441.83876  | 3893.743939 |             |
| 4736.397225  |              |             |             |             |             |
| FAM20A       | FAM20A       | 2.342742627 | 1.015591254 | 37.49994163 |             |
| 5.656525348  |              |             |             |             |             |
| KISS1R       | KISS1R       | 28.11291152 | 15.23386881 | 18.74997081 |             |
| 75.42033798  |              |             |             |             |             |
| PARP10       | PARP10       | 8083.633434 | 9042.824526 | 11099.98272 |             |
| 10715.34452  |              |             |             |             |             |

|                   |                 |             |             |
|-------------------|-----------------|-------------|-------------|
| MSANTD4 MSANTD4   | 940.6111647     | 959.7337351 | 1098.212576 |
| 946.5252416       |                 |             |             |
| PLEKHM1P PLEKHM1P | 843.7650311     | 678.2239905 | 483.4214369 |
| 933.9271177       |                 |             |             |
| FAM184B FAM184B   | 23.42742627     | 22.34300759 | 110.7141134 |
| 78.24860065       |                 |             |             |
| ZXDB ZXDB         | 427.5505294     | 292.4902812 | 1013.39128  |
| 854.1353276       |                 |             |             |
| MRPL15 MRPL15     | 4207.565758     | 6030.580867 | 3965.172399 |
| 3695.596561       |                 |             |             |
| NELFB NELFB       | 3249.384024     | 2162.19378  | 1574.104693 |
| 1509.349514       |                 |             |             |
| ACSM3 ACSM3       | 267.0726595     | 281.3187774 | 378.5708393 |
| 341.2770293       |                 |             |             |
| DDX11 DDX11       | 3728.474891     | 2821.312504 | 1450.890599 |
| 2695.334328       |                 |             |             |
| SLC7A60S SLC7A60S | 2001.467219     | 1586.036758 | 1856.500812 |
| 2326.782092       |                 |             |             |
| ZUFSP ZUFSP       | 1149.115259     | 1282.691754 | 1605.354644 |
| 1308.542864       |                 |             |             |
| RILPL2 RILPL2     | 4219.279471     | 3920.182241 | 2895.531207 |
| 3200.650593       |                 |             |             |
| UPRT UPRT         | 1307.250386     | 1249.177242 | 1496.426242 |
| 1564.972013       |                 |             |             |
| RNF183 RNF183     | 0 0             | 16.07140355 | 2.828262674 |
| PITPNM2 PITPNM2   | 282.3004865     | 184.8376082 | 139.2854975 |
| 186.6653365       |                 |             |             |
| MOC3S MOC3S       | 832.8450039     | 1112.072423 | 1724.104459 |
| 1106.79346        |                 |             |             |
| METTL7A METTL7A   | 934.7543081     | 635.760125  | 172.3211603 |
| 172.5240231       |                 |             |             |
| DCPS DCPS         | 4300.104092     | 4476.726248 | 2447.317619 |
| 2888.598945       |                 |             |             |
| SMAD6 SMAD6       | 0 2.031182508 0 | 0           | 0           |
| LYL1 LYL1         | 71.45365012     | 241.7107185 | 145.5354877 |
| 102.7602105       |                 |             |             |
| CCDC179 CCDC179   | 0 0             | 1.785711506 | 0           |
| ACTG2 ACTG2       | 29.28428284     | 67.02902277 | 117.8569594 |
| 20.74059294       |                 |             |             |
| CAMK4 CAMK4       | 3122.875922     | 4308.1381   | 7661.595217 |
| 5498.142639       |                 |             |             |
| LRP12 LRP12       | 670.0243913     | 385.9246765 | 314.2852251 |
| 360.1321138       |                 |             |             |
| AFG3L2 AFG3L2     | 4250.906497     | 5635.515869 | 4676.778434 |
| 4610.068159       |                 |             |             |
| KANSL2 KANSL2     | 3025.652103     | 3445.901125 | 4188.386337 |
| 3396.743472       |                 |             |             |
| TCIRG1 TCIRG1     | 8637.692065     | 7419.909702 | 5067.849254 |
| 7730.584643       |                 |             |             |
| SH2B3 SH2B3       | 2045.214313     | 2918.809264 | 2091.961029 |

|             |             |             |             |             |             |
|-------------|-------------|-------------|-------------|-------------|-------------|
| 1686.587308 |             |             |             |             |             |
| ADPRHL1     | ADPRHL1     | 5.856856567 | 17.26505132 | 24.10710533 |             |
| 5.656525348 |             |             |             |             |             |
| LHFPL1      | LHFPL1      | 15.22782708 | 22.34300759 | 53.57134518 |             |
| 53.73699081 |             |             |             |             |             |
| EXOC8       | EXOC8       | 549.373146  | 302.6461937 | 735.7131405 |             |
| 732.5200326 |             |             |             |             |             |
| ANKRD54     | ANKRD54     | 2061.613512 | 2530.853405 | 2035.711117 |             |
| 1530.090107 |             |             |             |             |             |
| C12orf60    | C12orf60    |             | 206.1613512 | 203.1182508 |             |
| 196.4282657 | 145.1841506 |             |             |             |             |
| PRTG        | PRTG        | 0           | 4.062365016 | 0           | 0           |
| HEATR3      | HEATR3      | 1016.7503   | 865.2837485 | 641.9632864 |             |
| 907.8723184 |             |             |             |             |             |
| ANKRD17     | ANKRD17     | 4899.846204 | 3174.73826  | 3206.245009 |             |
| 3625.832748 |             |             |             |             |             |
| DGCR14      | DGCR14      | 1171.371313 | 1666.585248 | 1620.533192 |             |
| 1299.115322 |             |             |             |             |             |
| PRSS56      | PRSS56      | 0           | 0           | 3.571423012 | 0.942754225 |
| GIMAP2      | GIMAP2      | 2736.323388 | 2178.44324  | 3811.60121  |             |
| 3557.954444 |             |             |             |             |             |
| SART1       | SART1       | 5303.969307 | 6528.220581 | 6197.311782 |             |
| 5495.314376 |             |             |             |             |             |
| SRSF9       | SRSF9       | 13009.24981 | 16801.94171 | 9446.413867 |             |
| 10509.8241  |             |             |             |             |             |
| GRM3        | GRM3        | 0           | 0           | 9.821413283 | 6.599279573 |
| DUSP10      | DUSP10      | 1875.365473 | 2788.813584 | 1946.425542 |             |
| 1723.354723 |             |             |             |             |             |
| CLC         | CLC         | 0           | 4.062365016 | 17.85711506 | 6.599279573 |
| CKS2        | CKS2        | 10937.09395 | 9415.546516 | 5801.776683 |             |
| 6389.045381 |             |             |             |             |             |
| LIPC        | LIPC        | 56.22582305 | 47.73278894 | 35.71423012 |             |
| 25.45436407 |             |             |             |             |             |
| CASC15      | CASC15      | 31.62702546 | 12.18709505 | 0           | 13.19855915 |
| LINC01102   | LINC01102   |             | 0           | 2.031182508 | 0           |
| CDIPT-AS1   | CDIPT-AS1   |             | 4.685485254 | 0           | 0           |
| 8.484788022 |             |             |             |             |             |
| HCG4        | HCG4        | 0           | 0           | 1.885508449 |             |
| GFI1B       | GFI1B       | 1.171371313 | 0           | 0           | 0           |
| ZNF671      | ZNF671      | 1131.544689 | 1103.947693 | 2108.032433 |             |
| 1793.118535 |             |             |             |             |             |
| IL17RB      | IL17RB      | 604.4275977 | 3674.409157 | 445.5350208 |             |
| 313.9371568 |             |             |             |             |             |
| RLTPR       | RLTPR       | 6471.826507 | 4478.75743  | 2604.460232 |             |
| 4198.084563 |             |             |             |             |             |
| FAM153A     | FAM153A     | 0           | 1.015591254 | 43.7499319  | 35.82466054 |
| ZNF660      | ZNF660      | 0           | 0           | 1.885508449 |             |
| TOR1AIP1    | TOR1AIP1    |             | 9401.426162 | 11980.93002 |             |
| 8711.593582 | 9494.477797 |             |             |             |             |
| CEND1       | CEND1       | 175.705697  | 162.4946006 | 33.03566286 |             |

|             |            |             |             |             |             |   |
|-------------|------------|-------------|-------------|-------------|-------------|---|
| 66.93554995 |            |             |             |             |             |   |
| YWHAG       | YWHAG      | 1195.970111 | 396.0805891 | 423.2136269 |             |   |
| 395.0140202 |            |             |             |             |             |   |
| BFAR        | BFAR       | 2598.101573 | 2566.399099 | 2708.031499 |             |   |
| 2088.200608 |            |             |             |             |             |   |
| NIPSNAP3A   | NIPSNAP3A  |             | 1277.966103 | 1571.11967  |             |   |
| 1177.676738 |            | 1026.659351 |             |             |             |   |
| NOL11       | NOL11      | 6203.582476 | 7077.655449 | 6694.632436 |             |   |
| 7723.985363 |            |             |             |             |             |   |
| ARHGAP21    | ARHGAP21   |             | 722.7361004 | 255.928996  |             |   |
| 128.5712284 |            | 342.2197836 |             |             |             |   |
| IGSF6       | IGSF6      | 5.856856567 | 10.15591254 | 49.10706642 |             |   |
| 35.82466054 |            |             |             |             |             |   |
| SLC35A5     | SLC35A5    | 2422.395876 | 2089.07121  | 2072.318203 |             |   |
| 2278.636961 |            |             |             |             |             |   |
| TMEM42      | TMEM42     | 440.4356139 | 548.4192772 | 691.0703528 |             |   |
| 523.2285947 |            |             |             |             |             |   |
| ZNF439      | ZNF439     | 87.85284851 | 111.7150379 | 327.6780614 |             |   |
| 488.3466884 |            |             |             |             |             |   |
| TICRR       | TICRR      | 1844.909819 | 1087.698233 | 253.5710339 |             |   |
| 639.1873644 |            |             |             |             |             |   |
| COL10A1     | COL10A1    | 2.342742627 | 0           | 6.249990271 | 6.599279573 |   |
| TCN1        | TCN1       | 0           | 2.031182508 | 18.74997081 | 8.484788022 |   |
| HGD         | HGD        | 8.199599194 | 0           | 0.892855753 | 0.942754225 |   |
| AMH         | AMH        | 33.96976809 | 6.093547524 | 9.821413283 |             |   |
| 16.96957604 |            |             |             |             |             |   |
| CDK8        | CDK8       | 508.37515   | 280.3031861 | 285.713841  |             |   |
| 246.0588527 |            |             |             |             |             |   |
| ADAMTS20    | ADAMTS20   |             | 0           | 0           | 2.678567259 | 0 |
| NDUFA13     | NDUFA13    | 11008.5476  | 12823.87076 | 7603.559593 |             |   |
| 7815.432523 |            |             |             |             |             |   |
| ATIC        | ATIC       | 10040.9949  | 12058.11496 | 8197.308669 |             |   |
| 10381.60952 |            |             |             |             |             |   |
| SNN         | SNN        | 1171.371313 | 1355.814324 | 3197.316452 |             |   |
| 2041.062897 |            |             |             |             |             |   |
| HIST1H4I    | HIST1H4I   |             | 50.36896648 | 62.96665775 |             |   |
| 11.60712479 |            | 17.91233027 |             |             |             |   |
| GPLD1       | GPLD1      | 38.65525334 | 54.84192772 | 75.89273901 |             |   |
| 82.01961755 |            |             |             |             |             |   |
| BTBD18      | BTBD18     | 24.59879758 | 21.32741634 | 51.78563368 |             |   |
| 37.71016899 |            |             |             |             |             |   |
| GPR75-ASB3  | GPR75-ASB3 |             | 1438.443973 | 1713.302446 |             |   |
| 1556.247578 |            | 1343.42477  |             |             |             |   |
| GRIN2D      | GRIN2D     | 3.51411394  | 3.046773762 | 9.821413283 |             | 0 |
| GRINA       | GRINA      | 470.891268  | 199.0558858 | 339.2851862 |             |   |
| 310.1661399 |            |             |             |             |             |   |
| U2SURP      | U2SURP     | 5747.919035 | 6617.592611 | 6155.347561 |             |   |
| 6148.643054 |            |             |             |             |             |   |
| PIH1D2      | PIH1D2     | 87.85284851 | 100.5435342 | 62.49990271 |             |   |
| 73.53482953 |            |             |             |             |             |   |

|              |              |             |             |             |
|--------------|--------------|-------------|-------------|-------------|
| KCNE1L       | KCNE1L       | 15.22782708 | 8.124730032 | 8.035701777 |
| 0.942754225  |              |             |             |             |
| KCND2        | KCND2        | 1.171371313 | 0           | 0           |
| CCR10        | CCR10        | 79.65324932 | 108.6682642 | 19.64282657 |
| 31.11088942  |              |             |             |             |
| TSPAN12      | TSPAN12      | 4.685485254 | 0           | 18.74997081 |
| CD1D         | CD1D         | 1.171371313 | 0           | 0           |
| GJB5         | GJB5         | 0           | 0           | 4.713771124 |
| ACAD8        | ACAD8        | 2368.512796 | 2285.080322 | 2334.817794 |
| 2437.019671  |              |             |             |             |
| LOC440300    | LOC440300    |             | 28.11291152 | 6.093547524 |
| 16.96425931  | 15.0840676   |             |             |             |
| REREP3       | REREP3       | 7.028227881 | 56.87311023 | 64.28561422 |
| 15.0840676   |              |             |             |             |
| CRYBB2P1     | CRYBB2P1     |             | 920.6978524 | 1647.289014 |
| 1171.426748  | 836.2229973  |             |             |             |
| ASB1         | ASB1         | 1357.619352 | 1321.284222 | 1176.783882 |
| 1088.88113   |              |             |             |             |
| HYOU1        | HYOU1        | 7348.012249 | 4600.628381 | 4228.564846 |
| 3855.864779  |              |             |             |             |
| PHAX         | PHAX         | 3693.333751 | 3890.730094 | 4363.386065 |
| 4069.869988  |              |             |             |             |
| CLIP1-AS1    | CLIP1-AS1    |             | 0           | 0           |
| 4.713771124  |              |             |             | 10.71426904 |
| LOC100506388 | LOC100506388 |             | 0           | 0           |
| KRT34        | KRT34        | 0           | 1.015591254 | 0           |
| PARPBP       | PARPBP       | 2367.341425 | 2603.975975 | 674.1060935 |
| 1284.031254  |              |             |             |             |
| MIR610       | MIR610       | 4.685485254 | 1.015591254 | 0           |
| PVT1         | PVT1         | 818.7885481 | 994.2638377 | 1658.033133 |
| 1328.340703  |              |             |             |             |
| SNX8         | SNX8         | 1248.68182  | 1689.943847 | 787.4987742 |
| 858.8490987  |              |             |             |             |
| RAB39A       | RAB39A       | 3.51411394  | 1.015591254 | 0           |
| USP25        | USP25        | 3197.843686 | 3228.564597 | 5304.456029 |
| 5234.171456  |              |             |             |             |
| MIR4668      | MIR4668      | 0           | 3.046773762 | 6.249990271 |
| 0.942754225  |              |             |             |             |
| MIR4667      | MIR4667      | 0           | 1.015591254 | 0.892855753 |
| 0            |              |             |             |             |
| MIR4665      | MIR4665      | 35.1411394  | 35.54569389 | 39.28565313 |
| 42.42394011  |              |             |             |             |
| MIR4664      | MIR4664      | 0           | 0           | 1.785711506 |
| MIR4505      | MIR4505      | 4.685485254 | 11.17150379 | 15.1785478  |
| 4.713771124  |              |             |             |             |
| PDLIM1       | PDLIM1       | 449.8065844 | 62.96665775 | 26.78567259 |
| 190.4363534  |              |             |             |             |
| NFKBIA       | NFKBIA       | 20828.15332 | 31508.71866 | 29307.99009 |
| 26602.63871  |              |             |             |             |
| TCEAL3       | TCEAL3       | 15.22782708 | 4.062365016 | 160.7140355 |
| 155.5544471  |              |             |             |             |
| DDX5         | DDX5         | 55467.94581 | 55703.1491  | 80432.91051 |

|               |               |             |             |             |
|---------------|---------------|-------------|-------------|-------------|
| 76426.25673   |               |             |             |             |
| SCGB2B2       | SCGB2B2       | 0           | 3.046773762 | 8.035701777 |
| TSR2          | TSR2          | 4214.593986 | 5748.246498 | 5879.455134 |
| 4747.710276   |               |             |             |             |
| CCDC102A      | CCDC102A      |             | 1166.685828 | 1092.776189 |
| 630.3561616   |               |             | 658.0424489 |             |
| TIGD7         | TIGD7         | 260.0444316 | 219.3677109 | 668.748959  |
| 576.9655855   |               |             |             |             |
| LDHAL6B       | LDHAL6B       | 0           | 5.07795627  | 0           |
| BRCC3         | BRCC3         | 3878.410419 | 4033.928461 | 2370.532024 |
| 3195.936822   |               |             |             |             |
| TSNAXIP1      | TSNAXIP1      |             | 17.5705697  | 16.24946006 |
| 131.2497957   |               |             | 29.22538097 |             |
| IAH1          | IAH1          | 2956.541195 | 2872.092066 | 1983.032627 |
| 2585.974838   |               |             |             |             |
| PCTP          | PCTP          | 647.7683363 | 719.0386079 | 230.3567843 |
| 637.3018559   |               |             |             |             |
| LMBR1         | LMBR1         | 2821.833494 | 2789.829175 | 2892.85264  |
| 3231.761482   |               |             |             |             |
| GOLPH3        | GOLPH3        | 9992.968675 | 9997.480305 | 7891.059145 |
| 8204.790018   |               |             |             |             |
| PHF5A         | PHF5A         | 1696.145662 | 1582.291174 | 1288.390852 |
| 988.0064275   |               |             |             |             |
| DNAJB7        | DNAJB7        | 16.39919839 | 118.8241767 | 192.8568427 |
| 28.28262674   |               |             |             |             |
| DIRAS1        | DIRAS1        | 0           | 1.015591254 | 6.249990271 |
| FRAT2         | FRAT2         | 834.0163752 | 1055.199313 | 1133.033951 |
| 935.2121909   |               |             |             |             |
| ELL2          | ELL2          | 4685.485254 | 4758.045025 | 3206.245009 |
| 3521.187029   |               |             |             |             |
| LOC100130093  | LOC100130093  |             | 1478.270598 | 1850.407265 |
| 2092.853885   |               |             | 1702.61413  |             |
| SLX1A-SULT1A3 | SLX1A-SULT1A3 |             | 130.0222158 | 102.5747167 |
| 159.8211798   |               |             | 119.7297865 |             |
| RNF215        | RNF215        | 35.1411394  | 50.7795627  | 8.92855753  |
| 33.93915209   |               |             |             |             |
| DNAJC22       | DNAJC22       | 0           | 0           | 4.713771124 |
| ALKBH4        | ALKBH4        | 762.5627251 | 1193.319724 | 808.9273122 |
| 804.1693537   |               |             |             |             |
| RNPC3         | RNPC3         | 554.0586313 | 435.688648  | 785.7130627 |
| 800.3983368   |               |             |             |             |
| FAM187B       | FAM187B       | 0           | 0           | 0.892855753 |
| ZNF100        | ZNF100        | 1289.679816 | 842.9407409 | 973.2127708 |
| 1157.702188   |               |             |             |             |
| NOL8          | NOL8          | 3421.575607 | 3634.801098 | 4491.957293 |
| 4726.026928   |               |             |             |             |
| F2            | F2            | 7.028227881 | 1.015591254 | 0           |
| CRISPLD1      | CRISPLD1      |             | 59.73993699 | 0.942754225 |
|               |               | 16.96957604 |             | 1.015591254 |
| LOC400863     | LOC400863     |             | 103.0806756 | 0           |
|               |               |             |             | 45.70160643 |



|                 |               |             |               |  |
|-----------------|---------------|-------------|---------------|--|
| 99.10698859     | 113.130507    |             |               |  |
| SRR SRR         | 3345.436471   | 4804.762223 | 3807.136931   |  |
| 4106.637403     |               |             |               |  |
| BCORL1 BCORL1   | 72.62502143   | 57.88870148 | 215.1782365   |  |
| 105.5884732     |               |             |               |  |
| ZNF653 ZNF653   | 251.8448324   | 160.4634181 | 117.8569594   |  |
| 190.4363534     |               |             |               |  |
| FBX034 FBX034   | 2280.659947   | 2891.3883   | 4879.45669    |  |
| 4093.438844     |               |             |               |  |
| LINC01248       | LINC01248     | 0 0         | 0 3.771016899 |  |
| TMEM165 TMEM165 | 6352.346633   | 6678.528087 | 4333.921825   |  |
| 4939.089383     |               |             |               |  |
| MSI1 MSI1       | 0 1.015591254 | 0           | 0             |  |
| PON1 PON1       | 0 1.015591254 | 0           | 5.656525348   |  |
| AIRE AIRE       | 32.79839678   | 19.29623383 | 1.785711506 0 |  |
| ECM2 ECM2       | 12.88508445   | 13.2026863  | 0 3.771016899 |  |
| FASLG FASLG     | 1957.361465   | 874.4240697 | 950.891377    |  |
| 1341.539262     |               |             |               |  |
| AKR7A3 AKR7A3   | 4.685485254   | 4.062365016 | 17.85711506   |  |
| 22.62610139     |               |             |               |  |
| MATN1 MATN1     | 28.11291152   | 16.24946006 | 173.2140161   |  |
| 113.130507      |               |             |               |  |
| BCR BCR         | 2804.262924   | 2722.800152 | 2499.996108   |  |
| 3090.348349     |               |             |               |  |
| FAM161A FAM161A | 229.5887774   | 258.9757698 | 260.7138799   |  |
| 230.9747851     |               |             |               |  |
| C9orf40 C9orf40 | 1402.131462   | 1334.486908 | 1014.284135   |  |
| 1091.709392     |               |             |               |  |
| AMFR AMFR       | 4648.001372   | 8782.833165 | 5305.348885   |  |
| 4413.97528      |               |             |               |  |
| PFDN4 PFDN4     | 2008.901803   | 1752.910504 | 908.0343008   |  |
| 1339.653753     |               |             |               |  |
| MMP15 MMP15     | 14.05645576   | 6.093547524 | 2.678567259   |  |
| 15.0840676      |               |             |               |  |
| SLC5A11 SLC5A11 | 2.342742627   | 2.031182508 | 25.89281684   |  |
| 10.37029647     |               |             |               |  |
| LONRF2 LONRF2   | 24.59879758   | 23.35859884 | 0 0.942754225 |  |
| PCSK5 PCSK5     | 35.1411394    | 81.24730032 | 474.9992606   |  |
| 283.7690216     |               |             |               |  |
| CAPZA2 CAPZA2   | 10802.38625   | 12318.10632 | 10101.76999   |  |
| 10655.00825     |               |             |               |  |
| PTCD1 PTCD1     | 4809.650613   | 6693.761955 | 5177.670512   |  |
| 5021.109001     |               |             |               |  |
| AZIN2 AZIN2     | 64.42542224   | 80.23170907 | 126.7855169   |  |
| 116.9015239     |               |             |               |  |
| ESC01 ESC01     | 1081.175722   | 758.6466668 | 1715.175902   |  |
| 1561.200996     |               |             |               |  |
| MRPL45P2        | MRPL45P2      | 115.96576   | 191.946747    |  |
| 149.1069108     | 145.1841506   |             |               |  |
| MIR3178 MIR3178 | 0 0           | 1.785711506 | 0             |  |

|             |             |             |             |             |             |
|-------------|-------------|-------------|-------------|-------------|-------------|
| MIR3177     | MIR3177     | 1.171371313 | 0           | 0.892855753 | 0           |
| CBWD3       | CBWD3       | 81.99599194 | 124.9177242 | 210.7139577 |             |
| 155.5544471 |             |             |             |             |             |
| ATP6V1G1    | ATP6V1G1    |             | 5251.257598 | 5953.395931 |             |
| 8393.736934 | 6643.589022 |             |             |             |             |
| CDC23       | CDC23       | 5655.380701 | 5702.544891 | 4599.099984 |             |
| 5319.96209  |             |             |             |             |             |
| LHFPL2      | LHFPL2      | 12.88508445 | 39.60805891 | 39.28565313 |             |
| 49.96597391 |             |             |             |             |             |
| MMP21       | MMP21       | 1.171371313 | 0           | 8.035701777 | 5.656525348 |
| PPP3R2      | PPP3R2      | 4.685485254 | 0           | 4.464278765 | 1.885508449 |
| PCDHB12     | PCDHB12     | 0           | 0           | 5.656525348 |             |
| LINC00964   | LINC00964   |             | 0           | 2.031182508 | 0           |
| DEPTOR      | DEPTOR      | 18.74194102 | 16.24946006 | 44.64278765 | 0           |
| 56.56525348 |             |             |             |             |             |
| MCIDAS      | MCIDAS      | 4.685485254 | 1.015591254 | 0           | 7.542033798 |
| STMND1      | STMND1      | 149.9355281 | 1181.132628 | 107.1426904 |             |
| 106.5312274 |             |             |             |             |             |
| BTN1A1      | BTN1A1      | 1.171371313 | 0           | 17.85711506 | 0           |
| MAP2K3      | MAP2K3      | 11518.09413 | 14610.29578 | 8237.487177 |             |
| 10237.36813 |             |             |             |             |             |
| CA4         | CA4         | 0           | 1.015591254 | 0           | 0           |
| CSF2RB      | CSF2RB      | 2710.553219 | 4499.069255 | 849.1058211 |             |
| 1370.764643 |             |             |             |             |             |
| MAP4K2      | MAP4K2      | 5981.021927 | 7430.065615 | 3841.958305 |             |
| 4732.626208 |             |             |             |             |             |
| ILVBL       | ILVBL       | 2837.061321 | 4203.532201 | 2707.138643 |             |
| 2176.819505 |             |             |             |             |             |
| TMEM59      | TMEM59      | 10081.99289 | 11311.65539 | 13998.1925  |             |
| 11688.26688 |             |             |             |             |             |
| TCF15       | TCF15       | 0           | 1.015591254 | 0           | 0           |
| PCDHB8      | PCDHB8      | 0           | 0           | 0.942754225 |             |
| TMEM234     | TMEM234     | 297.5283136 | 320.9268363 | 207.1425347 |             |
| 324.3074533 |             |             |             |             |             |
| GPR143      | GPR143      | 2.342742627 | 5.07795627  | 0           | 1.885508449 |
| ALDH9A1     | ALDH9A1     | 5486.703232 | 5657.858876 | 3693.74425  |             |
| 5155.922855 |             |             |             |             |             |
| ANXA6       | ANXA6       | 20090.1894  | 14305.6184  | 7520.524008 |             |
| 7493.953332 |             |             |             |             |             |
| AKR1C1      | AKR1C1      | 2.342742627 | 0           | 0           | 6.599279573 |
| KIAA1109    | KIAA1109    |             | 1340.048783 | 584.9805623 |             |
| 1141.962508 | 1464.097311 |             |             |             |             |
| TMEM243     | TMEM243     | 2559.44632  | 2723.815743 | 2826.781314 |             |
| 2634.055304 |             |             |             |             |             |
| NOL12       | NOL12       | 2498.535012 | 3330.123722 | 2150.889509 |             |
| 1972.241838 |             |             |             |             |             |
| PLEKHF1     | PLEKHF1     | 3570.339763 | 4954.054137 | 2787.495661 |             |
| 2322.94641  |             |             |             |             |             |
| SCD         | SCD         | 3037.365816 | 1661.507292 | 1212.498113 |             |
| 2356.885562 |             |             |             |             |             |

|             |             |             |             |             |             |
|-------------|-------------|-------------|-------------|-------------|-------------|
| DLEC1       | DLEC1       | 327.9839678 | 270.1472736 | 289.285264  |             |
| 252.6581322 |             |             |             |             |             |
| PLK1        | PLK1        | 13763.61293 | 19516.61713 | 3766.065566 |             |
| 5486.829588 |             |             |             |             |             |
| CCL24       | CCL24       | 2.342742627 | 0           | 6.249990271 | 0           |
| TLR2        | TLR2        | 43.3407386  | 123.902133  | 231.24964   |             |
| 168.7530062 |             |             |             |             |             |
| SNRPA1      | SNRPA1      | 5703.406925 | 7587.482259 | 5518.741409 |             |
| 5759.285559 |             |             |             |             |             |
| SNX2        | SNX2        | 4269.648438 | 5730.981447 | 5543.741371 |             |
| 4834.443664 |             |             |             |             |             |
| FSCN1       | FSCN1       | 297.5283136 | 57.88870148 | 105.3569789 |             |
| 246.0588527 |             |             |             |             |             |
| CCL18       | CCL18       | 0           | 3.046773762 | 0           | 0           |
| ZSWIM4      | ZSWIM4      | 175.705697  | 118.8241767 | 108.9284019 |             |
| 98.9891936  |             |             |             |             |             |
| ATP6AP1L    | ATP6AP1L    |             | 56.22582305 | 45.70160643 |             |
| 131.2497957 | 49.02321969 |             |             |             |             |
| TMEM252     | TMEM252     | 0           | 0           | 2.828262674 |             |
| CPNE8       | CPNE8       | 261.2158029 | 235.6171709 | 285.713841  |             |
| 231.9175393 |             |             |             |             |             |
| DDX42       | DDX42       | 1883.565072 | 997.3106115 | 1876.782793 |             |
| 1535.746632 |             |             |             |             |             |
| TMEM65      | TMEM65      | 254.187575  | 229.5236234 | 110.7141134 |             |
| 150.840676  |             |             |             |             |             |
| PRICKLE4    | PRICKLE4    |             | 33.96976809 | 67.02902277 |             |
| 150.8926223 | 91.4471598  |             |             |             |             |
| LCP2        | LCP2        | 12006.55596 | 12909.18043 | 10691.94764 |             |
| 12432.09996 |             |             |             |             |             |
| RABL2A      | RABL2A      | 192.1048954 | 204.1338421 | 401.7850889 |             |
| 451.5792736 |             |             |             |             |             |
| OGFOD3      | OGFOD3      | 1375.189922 | 1464.482588 | 1520.533347 |             |
| 1405.646549 |             |             |             |             |             |
| RBM22       | RBM22       | 5319.197134 | 5566.455663 | 5199.991906 |             |
| 5482.115817 |             |             |             |             |             |
| TMEM9B-AS1  | TMEM9B-AS1  |             | 67.93953618 | 32.49892013 |             |
| 57.14276819 | 136.6993626 |             |             |             |             |
| ACTN1-AS1   | ACTN1-AS1   |             | 0           | 1.015591254 | 0           |
| KBTBD7      | KBTBD7      | 859.7865441 | 946.5310488 | 820.534437  | 0           |
| 1046.457189 |             |             |             |             |             |
| TMEM260     | TMEM260     | 632.5405093 | 526.0762696 | 908.0343008 |             |
| 1010.632529 |             |             |             |             |             |
| OTOGL       | OTOGL       | 2.342742627 | 0           | 0           | 2.828262674 |
| NINL        | NINL        | 53.88308042 | 98.51235164 | 164.2854586 |             |
| 170.6385147 |             |             |             |             |             |
| NIPBL       | NIPBL       | 2827.690351 | 1901.186828 | 3873.208257 |             |
| 3555.126181 |             |             |             |             |             |
| PRX         | PRX         | 16.39919839 | 8.124730032 | 91.07128681 |             |
| 35.82466054 |             |             |             |             |             |
| HOXB4       | HOXB4       | 84.33873457 | 22.34300759 | 8.035701777 |             |

|             |             |             |             |             |
|-------------|-------------|-------------|-------------|-------------|
| 16.96957604 |             |             |             |             |
| ZNF280C     | ZNF280C     | 951.1535065 | 970.9052389 | 671.4275263 |
| 572.2518144 |             |             |             |             |
| STARD6      | STARD6      | 8.199599194 | 17.26505132 | 4.464278765 |
| 9.427542247 |             |             |             |             |
| TRUB1       | TRUB1       | 1718.401717 | 2496.323302 | 1475.89056  |
| 1573.456801 |             |             |             |             |
| PA2G4       | PA2G4       | 20536.48187 | 28763.5755  | 18208.90023 |
| 18422.36031 |             |             |             |             |
| ZNF519      | ZNF519      | 295.185571  | 277.2564124 | 590.1776528 |
| 301.6813519 |             |             |             |             |
| DRAM2       | DRAM2       | 1807.425937 | 1911.34274  | 2266.960757 |
| 2010.894761 |             |             |             |             |
| GOLGA8N     | GOLGA8N     | 2.342742627 | 5.07795627  | 19.64282657 |
| 9.427542247 |             |             |             |             |
| GOLGA8K     | GOLGA8K     | 3.51411394  | 0           | 0           |
| C6orf229    | C6orf229    | 8.199599194 | 4.062365016 |             |
| 12.49998054 | 6.599279573 |             |             |             |
| EA2F2       | EA2F2       | 1074.147494 | 1492.919143 | 596.427643  |
| 492.1177053 |             |             |             |             |
| WDR19       | WDR19       | 506.0324074 | 448.8913343 | 866.9629362 |
| 521.3430863 |             |             |             |             |
| ZSCAN16     | ZSCAN16     | 501.3469222 | 639.8224901 | 867.8557919 |
| 761.7454136 |             |             |             |             |
| TGFB1       | TGFB1       | 4034.202804 | 2289.142687 | 1689.283085 |
| 1562.14375  |             |             |             |             |
| USP6        | USP6        | 32.79839678 | 22.34300759 | 42.85707615 |
| 26.39711829 |             |             |             |             |
| BYSL        | BYSL        | 2066.298997 | 3046.773762 | 1612.49749  |
| 1735.610528 |             |             |             |             |
| BNIP3       | BNIP3       | 1044.863212 | 1072.464364 | 1773.211526 |
| 2282.407978 |             |             |             |             |
| GPR37L1     | GPR37L1     | 2.342742627 | 0           | 6.249990271 |
| 7.542033798 |             |             |             |             |
| TMEM45A     | TMEM45A     | 0           | 5.07795627  | 16.07140355 |
| 9.427542247 |             |             |             |             |
| KIR2DL1     | KIR2DL1     | 0           | 0           | 2.828262674 |
|             |             |             |             |             |
| ZBTB25      | ZBTB25      | 926.5547089 | 591.0741099 | 1106.248278 |
| 1270.832695 |             |             |             |             |
| FBX030      | FBX030      | 1557.923847 | 1316.206265 | 1136.605374 |
| 1222.752229 |             |             |             |             |
| IDH3B       | IDH3B       | 7617.427651 | 10114.2733  | 7504.452604 |
| 6756.719529 |             |             |             |             |
| RASGRF2     | RASGRF2     | 483.7763525 | 514.9047658 | 1080.355461 |
| 1055.884732 |             |             |             |             |
| DSEL        | DSEL        | 1.171371313 | 8.124730032 | 267.8567259 |
| 60.33627038 |             |             |             |             |
| ASTN2-AS1   | ASTN2-AS1   | 2.342742627 | 2.031182508 |             |
| 0.892855753 | 0           |             |             |             |
| MIR1306     | MIR1306     | 122.9939879 | 148.2763231 | 74.99988325 |
| 52.79423658 |             |             |             |             |
| CIAPIN1     | CIAPIN1     | 5373.080215 | 7949.032745 | 4616.957099 |

|             |          |             |             |             |             |
|-------------|----------|-------------|-------------|-------------|-------------|
| 4200.912825 |          |             |             |             |             |
| CHMP4A      | CHMP4A   | 6492.911191 | 8547.215994 | 5535.705669 |             |
| 5935.580599 |          |             |             |             |             |
| FCRL6       | FCRL6    | 4.685485254 | 0           | 0.892855753 | 0           |
| RND2        | RND2     | 4.685485254 | 5.07795627  | 0           | 26.39711829 |
| SNHG8       | SNHG8    | 621.9981674 | 700.7579653 | 1383.926417 |             |
| 993.6629528 |          |             |             |             |             |
| PTPN1       | PTPN1    | 4419.583966 | 4398.525721 | 5708.026829 |             |
| 5795.110219 |          |             |             |             |             |
| FOX03B      | FOX03B   | 193.2762667 | 252.8822223 | 537.4991633 |             |
| 398.7850371 |          |             |             |             |             |
| LAMTOR3     | LAMTOR3  | 2380.226509 | 2180.474422 | 2788.388517 |             |
| 2616.142974 |          |             |             |             |             |
| HNRNPH1     | HNRNPH1  | 14206.39129 | 9597.337351 | 9648.199267 |             |
| 10054.47381 |          |             |             |             |             |
| STK4        | STK4     | 16506.96455 | 14497.56515 | 16786.58101 |             |
| 17715.29464 |          |             |             |             |             |
| DAPP1       | DAPP1    | 5047.43899  | 4825.074048 | 3446.423207 |             |
| 4338.554942 |          |             |             |             |             |
| DCX         | DCX      | 0           | 0           | 0.942754225 |             |
| ZNF770      | ZNF770   | 2359.141825 | 1984.46531  | 4100.886474 |             |
| 3947.311939 |          |             |             |             |             |
| LSM4        | LSM4     | 8846.196159 | 15410.58169 | 8132.130199 |             |
| 7262.978547 |          |             |             |             |             |
| PIH1D1      | PIH1D1   | 3694.505123 | 4864.682107 | 3370.530468 |             |
| 3443.881183 |          |             |             |             |             |
| FAM98C      | FAM98C   | 572.8005723 | 772.8649443 | 741.9631308 |             |
| 641.0728728 |          |             |             |             |             |
| RNF151      | RNF151   | 5.856856567 | 2.031182508 | 2.678567259 | 0           |
| MIR1322     | MIR1322  | 0           | 3.571423012 | 0.942754225 |             |
| FAXC        | FAXC     | 108.9375322 | 7.109138778 | 1.785711506 |             |
| 12.25580492 |          |             |             |             |             |
| SLC25A18    | SLC25A18 |             | 8.199599194 | 2.031182508 |             |
| 14.28569205 |          | 8.484788022 |             |             |             |
| PADI2       | PADI2    | 24.59879758 | 37.5768764  | 7.142846024 |             |
| 10.37029647 |          |             |             |             |             |
| PRDM13      | PRDM13   | 4.685485254 | 2.031182508 | 0           | 0           |
| SCPEP1      | SCPEP1   | 1692.631548 | 2705.535101 | 1868.747091 |             |
| 1711.098918 |          |             |             |             |             |
| TMEM241     | TMEM241  | 459.1775549 | 801.3014994 | 339.2851862 |             |
| 514.7438067 |          |             |             |             |             |
| HECA        | HECA     | 1056.576925 | 485.4526194 | 765.1773803 |             |
| 1197.297865 |          |             |             |             |             |
| GPR65       | GPR65    | 1833.196106 | 1232.927782 | 2004.461166 |             |
| 2698.162591 |          |             |             |             |             |
| SLFN5       | SLFN5    | 9360.428166 | 12040.84991 | 12921.40846 |             |
| 7422.304011 |          |             |             |             |             |
| SWAP70      | SWAP70   | 591.5425133 | 1209.569184 | 941.0699637 |             |
| 670.2982538 |          |             |             |             |             |
| TRIM62      | TRIM62   | 593.8852559 | 571.777876  | 859.8200902 |             |

|              |              |             |             |             |             |
|--------------|--------------|-------------|-------------|-------------|-------------|
| 613.7330003  |              |             |             |             |             |
| NUS1         | NUS1         | 2028.815115 | 1587.36913  | 1467.854858 |             |
| 1704.499638  |              |             |             |             |             |
| TMEM199      | TMEM199      | 2413.024906 | 3133.099019 | 3723.20849  |             |
| 2903.683012  |              |             |             |             |             |
| LAMA5        | LAMA5        | 28.11291152 | 16.24946006 | 0           | 4.713771124 |
| TXNL4A       | TXNL4A       | 5828.743656 | 6112.843758 | 3467.851745 |             |
| 3881.319143  |              |             |             |             |             |
| SLC3A1       | SLC3A1       | 310.4133981 | 219.3677109 | 436.6064632 |             |
| 648.6149066  |              |             |             |             |             |
| ABCD2        | ABCD2        | 2384.911994 | 566.6999198 | 1139.283941 |             |
| 1989.211414  |              |             |             |             |             |
| PIDD1        | PIDD1        | 2695.325392 | 3238.720509 | 1776.782949 |             |
| 1538.574895  |              |             |             |             |             |
| NME9         | NME9         | 11.71371313 | 2.031182508 | 13.3928363  |             |
| 27.33987252  |              |             |             |             |             |
| GLI3         | GLI3         | 1.171371313 | 0           | 16.07140355 | 9.427542247 |
| C1GALT1      | C1GALT1      | 4264.962952 | 2744.127568 | 2813.388478 |             |
| 3188.394788  |              |             |             |             |             |
| CNN3         | CNN3         | 43.3407386  | 206.1650246 | 1233.926651 |             |
| 311.1088942  |              |             |             |             |             |
| DKFZP434A062 | DKFZP434A062 | 0           | 0           | 0           | 0.942754225 |
| FAM182B      | FAM182B      | 0           | 2.031182508 | 0           | 0           |
| SPRTN        | SPRTN        | 1430.244374 | 1409.640661 | 1106.248278 |             |
| 1251.97761   |              |             |             |             |             |
| ANGPTL6      | ANGPTL6      | 1616.492413 | 1525.418064 | 2380.353438 |             |
| 2188.132556  |              |             |             |             |             |
| LOC730101    | LOC730101    |             | 36.31251072 | 169.6037394 | 0           |
| 17.91233027  |              |             |             |             |             |
| VTRNA1-3     | VTRNA1-3     |             | 32.79839678 | 24.3741901  |             |
| 43.7499319   | 17.91233027  |             |             |             |             |
| TTC30A       | TTC30A       | 92.53833376 | 120.8553592 | 91.07128681 |             |
| 122.5580492  |              |             |             |             |             |
| CHMP7        | CHMP7        | 10693.44872 | 9267.270193 | 12002.65989 |             |
| 9155.086276  |              |             |             |             |             |
| OR7D2        | OR7D2        | 1.171371313 | 0           | 0           | 0           |
| GNG5         | GNG5         | 11693.79982 | 9980.215254 | 7156.238861 |             |
| 7756.981761  |              |             |             |             |             |
| GNB2         | GNB2         | 4384.442826 | 2272.893227 | 1398.212109 |             |
| 1564.029259  |              |             |             |             |             |
| KIR2DS1      | KIR2DS1      | 0           | 0           | 1.885508449 |             |
| CXCL14       | CXCL14       | 0           | 0           | 13.3928363  | 0           |
| NUAK1        | NUAK1        | 1.171371313 | 1.015591254 | 1.785711506 |             |
| 3.771016899  |              |             |             |             |             |
| PTPRG        | PTPRG        | 36.31251072 | 28.43655511 | 29.46423985 |             |
| 19.79783872  |              |             |             |             |             |
| TSPYL4       | TSPYL4       | 680.5667331 | 717.0074254 | 795.5344759 |             |
| 539.2554165  |              |             |             |             |             |
| UTP14C       | UTP14C       | 1446.643572 | 1288.785301 | 1802.675765 |             |
| 2065.574506  |              |             |             |             |             |

|             |             |             |             |             |             |
|-------------|-------------|-------------|-------------|-------------|-------------|
| SNORD95     | SNORD95     | 21.08468364 | 8.124730032 | 4.464278765 |             |
| 6.599279573 |             |             |             |             |             |
| SNORA41     | SNORA41     | 10.54234182 | 22.34300759 | 16.07140355 |             |
| 11.3130507  |             |             |             |             |             |
| CRYZL1      | CRYZL1      | 1279.137474 | 1478.700866 | 1461.604868 |             |
| 1550.8307   |             |             |             |             |             |
| SKOR1       | SKOR1       | 0           | 1.015591254 | 5.357134518 | 0.942754225 |
| METTL10     | METTL10     | 1389.246378 | 1207.538001 | 949.9985212 |             |
| 1285.916763 |             |             |             |             |             |
| B4GALT4     | B4GALT4     | 651.2824503 | 935.359545  | 1968.746935 |             |
| 1371.707397 |             |             |             |             |             |
| VHLL        | VHLL        | 3.51411394  | 0           | 11.60712479 | 0           |
| KLHL9       | KLHL9       | 1411.502433 | 1300.972396 | 3149.102241 |             |
| 2948.935215 |             |             |             |             |             |
| DNASE2      | DNASE2      | 3378.234868 | 4056.271469 | 3642.851472 |             |
| 2784.89598  |             |             |             |             |             |
| GAREM       | GAREM       | 0           | 0           | 31.24995136 | 15.0840676  |
| RPS6KA5     | RPS6KA5     | 3105.305352 | 5235.372915 | 3506.244542 |             |
| 3605.092155 |             |             |             |             |             |
| TOMM7       | TOMM7       | 2828.861722 | 3180.831808 | 4116.957877 |             |
| 3179.91     |             |             |             |             |             |
| GNMT        | GNMT        | 22.25605496 | 7.109138778 | 22.32139383 |             |
| 26.39711829 |             |             |             |             |             |
| OR1Q1       | OR1Q1       | 2.342742627 | 0           | 1.785711506 | 0           |
| OR1F1       | OR1F1       | 0           | 4.062365016 | 5.357134518 | 0           |
| KLHL24      | KLHL24      | 1211.197938 | 900.8294423 | 4871.420989 |             |
| 3181.795508 |             |             |             |             |             |
| MIR32       | MIR32       | 1.171371313 | 0           | 0           | 1.885508449 |
| MIR24-1     | MIR24-1     | 0           | 2.031182508 | 0           | 0           |
| MIR222      | MIR222      | 0           | 0           | 0.892855753 | 0.942754225 |
| MIR221      | MIR221      | 2.342742627 | 0           | 7.142846024 | 3.771016899 |
| OGFRP1      | OGFRP1      | 22.25605496 | 34.53010264 | 47.32135491 |             |
| 33.93915209 |             |             |             |             |             |
| PPIAP30     | PPIAP30     | 0           | 9.140321286 | 9.821413283 | 5.656525348 |
| FGF14       | FGF14       | 2.342742627 | 0           | 0           | 0           |
| CTSW        | CTSW        | 1012.064815 | 1152.696073 | 1520.533347 |             |
| 1461.269048 |             |             |             |             |             |
| DVL2        | DVL2        | 2295.887774 | 2403.904498 | 4034.815148 |             |
| 3304.353558 |             |             |             |             |             |
| DVL1        | DVL1        | 322.1271112 | 245.7730835 | 284.8209852 |             |
| 258.3146576 |             |             |             |             |             |
| DUSP1       | DUSP1       | 872.6716285 | 880.5176173 | 2835.709872 |             |
| 2304.091325 |             |             |             |             |             |
| MIR4763     | MIR4763     | 0           | 0           | 2.678567259 | 0.942754225 |
| MIR548F1    | MIR548F1    | 0           | 1.171371313 | 1.015591254 | 0           |
| 0           |             |             |             |             |             |
| MIR1304     | MIR1304     | 10.54234182 | 4.062365016 | 13.3928363  |             |
| 5.656525348 |             |             |             |             |             |
| MPHOSPH9    | MPHOSPH9    |             | 4519.150527 | 3157.473209 |             |
| 2388.389139 | 2972.504071 |             |             |             |             |

|             |            |             |             |             |             |
|-------------|------------|-------------|-------------|-------------|-------------|
| REEP3       | REEP3      | 3167.388032 | 1571.11967  | 1059.819779 |             |
| 1777.091714 |            |             |             |             |             |
| TRNP1       | TRNP1      | 8.199599194 | 4.062365016 | 5.357134518 |             |
| 1.885508449 |            |             |             |             |             |
| FAM95C      | FAM95C     | 0           | 3.046773762 | 0           | 0.942754225 |
| CCDC144NL   | CCDC144NL  |             | 2.342742627 | 0           | 2.678567259 |
| 0           |            |             |             |             |             |
| C17orf97    | C17orf97   |             | 9.370970508 | 16.24946006 |             |
| 20.53568232 | 11.3130507 |             |             |             |             |
| H2BFM       | H2BFM      | 0           | 3.046773762 | 0           | 0           |
| ALOX12      | ALOX12     | 206.1613512 | 127.964498  | 188.3925639 |             |
| 288.4827928 |            |             |             |             |             |
| AVPR1A      | AVPR1A     | 0           | 0           | 0           | 0.942754225 |
| NMNAT3      | NMNAT3     | 72.62502143 | 73.12257029 | 191.9639869 |             |
| 151.7834302 |            |             |             |             |             |
| TRIM34      | TRIM34     | 992.1515025 | 973.9520126 | 1062.498346 |             |
| 1116.221002 |            |             |             |             |             |
| SCYL1       | SCYL1      | 3919.408415 | 4472.663883 | 4913.385209 |             |
| 4291.417231 |            |             |             |             |             |
| RD3         | RD3        | 0           | 2.031182508 | 0           | 0           |
| CCDC61      | CCDC61     | 636.0546232 | 743.412798  | 560.7134129 |             |
| 693.8671094 |            |             |             |             |             |
| LCLAT1      | LCLAT1     | 1970.246549 | 1300.972396 | 1078.56975  |             |
| 1305.714601 |            |             |             |             |             |
| MIR7-1      | MIR7-1     | 9.370970508 | 2.031182508 | 14.28569205 |             |
| 16.02682182 |            |             |             |             |             |
| MIR199A1    | MIR199A1   |             | 0           | 0           | 1.785711506 |
|             |            |             |             |             | 0           |
| MIR92A1     | MIR92A1    | 7.028227881 | 2.031182508 | 0.892855753 | 0           |
| MIR31       | MIR31      | 0           | 0           | 0.892855753 | 0           |
| MIR23A      | MIR23A     | 0           | 0           | 0           | 1.885508449 |
| MIR22       | MIR22      | 29.28428284 | 51.79515396 | 70.53560449 |             |
| 35.82466054 |            |             |             |             |             |
| MIR29A      | MIR29A     | 0           | 0           | 2.678567259 | 4.713771124 |
| MIR20A      | MIR20A     | 1.171371313 | 0           | 0           | 1.885508449 |
| MIR19A      | MIR19A     | 7.028227881 | 0           | 0           | 1.885508449 |
| CBWD5       | CBWD5      | 387.7239048 | 552.4816422 | 776.7845051 |             |
| 551.5112215 |            |             |             |             |             |
| MAP3K11     | MAP3K11    | 3054.936386 | 1796.580928 | 1738.390151 |             |
| 1539.517649 |            |             |             |             |             |
| SELT        | SELT       | 20528.28227 | 21112.11099 | 14562.47733 |             |
| 14690.93908 |            |             |             |             |             |
| TOB2        | TOB2       | 3462.573603 | 2076.884115 | 2045.53253  |             |
| 2372.912384 |            |             |             |             |             |
| KLF2        | KLF2       | 6333.604692 | 5596.923401 | 1930.354138 |             |
| 1599.853919 |            |             |             |             |             |
| GML         | GML        | 1.171371313 | 0           | 0           | 1.885508449 |
| DOC2B       | DOC2B      | 18.74194102 | 0           | 0           | 0           |
| STAG3L4     | STAG3L4    | 468.5485254 | 399.1273628 | 566.0705474 |             |
| 670.2982538 |            |             |             |             |             |
| PDHA2       | PDHA2      | 0           | 1.015591254 | 0           | 0           |



|             |           |             |             |             |             |
|-------------|-----------|-------------|-------------|-------------|-------------|
| LOC650226   | LOC650226 | 0           | 0           | 1.785711506 | 0           |
| NOP58       | NOP58     | 9025.41597  | 11085.17854 | 10603.55492 |             |
| 11671.2973  |           |             |             |             |             |
| PTGDS       | PTGDS     | 10.54234182 | 11.17150379 | 2.678567259 |             |
| 6.599279573 |           |             |             |             |             |
| RPS6KA1     | RPS6KA1   | 16128.61162 | 22209.96513 | 8806.236292 |             |
| 11606.24726 |           |             |             |             |             |
| RPS2        | RPS2      | 39409.61647 | 57809.48536 | 48758.85267 |             |
| 43575.04302 |           |             |             |             |             |
| MTPN        | MTPN      | 5817.029943 | 4175.095645 | 3399.101852 |             |
| 3825.696644 |           |             |             |             |             |
| ZNF511      | ZNF511    | 2417.710391 | 3189.972129 | 1918.747013 |             |
| 2057.089718 |           |             |             |             |             |
| TSPAN16     | TSPAN16   | 1.171371313 | 0           | 0           |             |
| GLDC        | GLDC      | 466.2057828 | 134.0580455 | 18.74997081 |             |
| 592.9924073 |           |             |             |             |             |
| MRPL17      | MRPL17    | 2366.170053 | 3002.087747 | 3021.423868 |             |
| 2755.670599 |           |             |             |             |             |
| GCN1L1      | GCN1L1    | 12753.89086 | 6344.398564 | 5846.419471 |             |
| 6488.977329 |           |             |             |             |             |
| PCNX        | PCNX      | 2478.621699 | 1016.606845 | 1586.604673 |             |
| 1663.018452 |           |             |             |             |             |
| CLPTM1L     | CLPTM1L   | 9725.896016 | 11741.25049 | 7412.488462 |             |
| 6716.181097 |           |             |             |             |             |
| TG          | TG        | 52.71170911 | 31.48332888 | 18.74997081 |             |
| 17.91233027 |           |             |             |             |             |
| HOXD1       | HOXD1     | 1.171371313 | 4.062365016 | 0           | 0           |
| PURA        | PURA      | 1138.572917 | 629.6665775 | 893.7486088 |             |
| 889.0172339 |           |             |             |             |             |
| SLC25A47    | SLC25A47  |             | 0           | 0           | 3.771016899 |
| ADPGK       | ADPGK     | 4510.950928 | 5888.398091 | 6838.382212 |             |
| 5754.571788 |           |             |             |             |             |
| LINC01490   | LINC01490 |             | 0           | 0           | 0.892855753 |
| SPDL1       | SPDL1     | 3748.388203 | 3740.422589 | 1481.247694 | 0           |
| 2277.694207 |           |             |             |             |             |
| RNF43       | RNF43     | 182.7339249 | 110.6994467 | 109.8212576 |             |
| 138.584871  |           |             |             |             |             |
| OR2L2       | OR2L2     | 2.342742627 | 0           | 0           | 5.656525348 |
| ZNF676      | ZNF676    | 0           | 0           | 1.885508449 |             |
| LRRC45      | LRRC45    | 1266.25239  | 916.0633112 | 416.9636367 |             |
| 651.4431693 |           |             |             |             |             |
| MIR4469     | MIR4469   | 22.25605496 | 22.34300759 | 14.28569205 |             |
| 4.713771124 |           |             |             |             |             |
| MIR4467     | MIR4467   | 3.51411394  | 0           | 1.785711506 | 3.771016899 |
| MIR483      | MIR483    | 0           | 0           | 0.942754225 |             |
| KAT2B       | KAT2B     | 2868.688347 | 4517.349898 | 1099.105432 |             |
| 2160.792683 |           |             |             |             |             |
| DDX25       | DDX25     | 1.171371313 | 1.015591254 | 0           | 0           |
| MIR31HG     | MIR31HG   | 0           | 1.015591254 | 27.67852834 | 19.79783872 |
| MIR629      | MIR629    | 0           | 1.015591254 | 2.678567259 | 0           |

|             |             |             |             |   |             |   |
|-------------|-------------|-------------|-------------|---|-------------|---|
| SYT5        | SYT5        | 1.171371313 | 0           | 0 | 0           |   |
| DUSP16      | DUSP16      | 2787.863726 | 1659.476109 |   | 1163.391046 |   |
| 1320.798669 |             |             |             |   |             |   |
| PPM1E       | PPM1E       | 29.28428284 | 56.87311023 |   | 35.71423012 |   |
| 13.19855915 |             |             |             |   |             |   |
| TMEM253     | TMEM253     | 16.39919839 | 23.35859884 |   | 15.1785478  |   |
| 19.79783872 |             |             |             |   |             |   |
| ICAM1       | ICAM1       | 3214.242884 | 6239.792665 |   | 7251.774426 |   |
| 6268.37284  |             |             |             |   |             |   |
| ERCC6       | ERCC6       | 978.0950467 | 1124.259518 |   | 1294.640842 |   |
| 1227.466001 |             |             |             |   |             |   |
| ERCC5       | ERCC5       | 3339.579615 | 3587.068309 |   | 5147.313416 |   |
| 4664.747904 |             |             |             |   |             |   |
| FOSL2       | FOSL2       | 1020.264414 | 1475.654092 |   | 1074.105471 |   |
| 961.6093092 |             |             |             |   |             |   |
| C9orf69     | C9orf69     | 4510.950928 | 4542.739679 |   | 3224.99498  |   |
| 3329.807922 |             |             |             |   |             |   |
| MEGF8       | MEGF8       | 174.5343257 | 111.7150379 |   | 144.642632  |   |
| 181.0088111 |             |             |             |   |             |   |
| YWHAH       | YWHAH       | 14202.87718 | 22440.50435 |   | 11348.19662 |   |
| 11165.03828 |             |             |             |   |             |   |
| TYR         | TYR         | 2.342742627 | 0           | 0 | 0           |   |
| TPGS1       | TPGS1       | 726.2502143 | 928.2504062 |   | 980.3556168 |   |
| 691.9816009 |             |             |             |   |             |   |
| VWCE        | VWCE        | 152.2782708 | 125.9333155 |   | 374.1065605 |   |
| 32.05364364 |             |             |             |   |             |   |
| PATL1       | PATL1       | 1413.845175 | 683.492914  |   | 634.8204404 |   |
| 885.246217  |             |             |             |   |             |   |
| SLC25A41    | SLC25A41    |             | 1.171371313 |   | 4.062365016 |   |
| 6.249990271 | 41.48118589 |             |             |   |             |   |
| TMPRSS9     | TMPRSS9     | 44.51210991 | 44.68601518 |   | 60.71419121 |   |
| 54.67974503 |             |             |             |   |             |   |
| F3          | F3          | 3.51411394  | 6.093547524 |   | 58.9284797  | 0 |
| PITPNC1     | PITPNC1     | 1862.480388 | 1231.912191 |   | 2485.710416 |   |
| 3129.001272 |             |             |             |   |             |   |
| RAD54B      | RAD54B      | 1573.151674 | 1484.794413 |   | 1058.034067 |   |
| 1059.655749 |             |             |             |   |             |   |
| ZNF658      | ZNF658      | 49.19759517 | 43.67042392 |   | 190.1782754 |   |
| 180.0660569 |             |             |             |   |             |   |
| FAM134C     | FAM134C     | 8595.522698 | 8480.186971 |   | 8233.022899 |   |
| 7878.597056 |             |             |             |   |             |   |
| SESTD1      | SESTD1      | 688.7663323 | 305.6929675 |   | 82.14272928 |   |
| 565.6525348 |             |             |             |   |             |   |
| SURF2       | SURF2       | 875.0143712 | 1209.569184 |   | 1015.176991 |   |
| 888.0744797 |             |             |             |   |             |   |
| TMEM258     | TMEM258     | 5148.176923 | 4711.327828 |   | 3857.136853 |   |
| 4003.877192 |             |             |             |   |             |   |
| PDXP        | PDXP        | 2769.121785 | 5513.644918 |   | 2640.174462 |   |
| 2381.397172 |             |             |             |   |             |   |
| RPF2        | RPF2        | 2584.045117 | 2837.561964 |   | 2632.13876  |   |

|             |           |             |             |             |             |
|-------------|-----------|-------------|-------------|-------------|-------------|
| 2842.403988 |           |             |             |             |             |
| BMP7        | BMP7      | 0           | 0           | 0           | 16.02682182 |
| PPP4R2      | PPP4R2    | 3290.38202  |             | 1814.861571 | 1509.819078 |
| 1438.642947 |           |             |             |             |             |
| RBM26       | RBM26     | 3119.361808 |             | 2036.260464 | 2622.317347 |
| 2763.212633 |           |             |             |             |             |
| INVS        | INVS      | 987.4660172 |             | 1176.054672 | 1146.426787 |
| 876.761429  |           |             |             |             |             |
| FUT8-AS1    | FUT8-AS1  |             |             | 187.4194102 | 146.2451406 |
| 110.7141134 |           | 130.100083  |             |             |             |
| ILF3-AS1    | ILF3-AS1  |             |             | 640.7401085 | 815.519777  |
| 1802.675765 |           | 1144.503629 |             |             |             |
| RASAL2      | RASAL2    | 0           | 1.015591254 | 0.892855753 | 10.37029647 |
| C2orf47     | C2orf47   | 1423.216146 |             | 1398.469157 | 1126.78396  |
| 1271.775449 |           |             |             |             |             |
| HPS6        | HPS6      | 2681.268937 |             | 2685.223276 | 2199.996575 |
| 2076.887557 |           |             |             |             |             |
| HHIPL2      | HHIPL2    | 0           | 0           | 0           | 10.37029647 |
| SHCBP1      | SHCBP1    | 9246.805148 |             | 10504.26034 | 2591.067395 |
| 3774.787916 |           |             |             |             |             |
| DEF6        | DEF6      | 13818.66738 |             | 17494.57494 | 8595.522334 |
| 9678.314871 |           |             |             |             |             |
| C1orf54     | C1orf54   | 65.59679355 |             | 67.02902277 | 91.07128681 |
| 84.84788022 |           |             |             |             |             |
| SH3TC2      | SH3TC2    | 0           | 0           | 0           | 3.771016899 |
| TNS3        | TNS3      | 618.4840535 |             | 29.45214637 | 26.78567259 |
| 603.3627038 |           |             |             |             |             |
| MRGPRX2     | MRGPRX2   | 1.171371313 |             | 0           | 0           |
| 7.542033798 |           |             |             |             |             |
| SLC35G5     | SLC35G5   | 0           | 0           | 6.249990271 | 8.484788022 |
| TNS4        | TNS4      | 90.19559114 |             | 27.42096386 | 53.57134518 |
| 54.67974503 |           |             |             |             |             |
| TMEM141     | TMEM141   | 932.4115655 |             | 989.1858814 | 1233.926651 |
| 917.2998606 |           |             |             |             |             |
| CSRNP1      | CSRNP1    | 2011.244545 |             | 2253.596993 | 3038.388128 |
| 2650.082126 |           |             |             |             |             |
| B3GALTL     | B3GALTL   | 1235.796736 |             | 1170.976716 | 1194.640998 |
| 1077.568079 |           |             |             |             |             |
| ZBTB41      | ZBTB41    | 303.3851702 |             | 206.1650246 | 431.2493287 |
| 445.9227483 |           |             |             |             |             |
| POLR2J4     | POLR2J4   | 756.7058685 |             | 875.439661  | 883.0343397 |
| 916.3571064 |           |             |             |             |             |
| SCAND2P     | SCAND2P   | 458.0061836 |             | 323.97361   | 958.034223  |
| 750.4323629 |           |             |             |             |             |
| LOC728554   | LOC728554 |             |             | 899.6131687 | 2460.777609 |
| 1515.176213 |           | 873.9331663 |             |             |             |
| PKI55       | PKI55     | 97.22381902 |             | 64.99784026 | 66.96418148 |
| 85.79063445 |           |             |             |             |             |
| WTIP        | WTIP      | 4.685485254 |             | 1.015591254 | 0           |
| 2.828262674 |           |             |             |             |             |
| DCLK2       | DCLK2     | 0           | 0           | 0.892855753 | 0           |
| SNX32       | SNX32     | 17.5705697  |             | 12.18709505 | 36.60708587 |

|             |             |             |             |             |
|-------------|-------------|-------------|-------------|-------------|
| 34.88190631 |             |             |             |             |
| GATSL2      | GATSL2      | 141.7359289 | 52.81074521 | 53.57134518 |
| 69.76381263 |             |             |             |             |
| FOXN2       | FOXN2       | 4152.511306 | 2618.194253 | 3013.388166 |
| 3847.379991 |             |             |             |             |
| DRG2        | DRG2        | 3290.38202  | 4307.122508 | 2532.138916 |
| 2841.461233 |             |             |             |             |
| MORC3       | MORC3       | 3425.089721 | 3566.756484 | 8832.129109 |
| 6232.54818  |             |             |             |             |
| LINC00309   | LINC00309   |             | 11.71371313 | 13.2026863  |
| 18.74997081 | 16.02682182 |             |             |             |
| TTC21B-AS1  | TTC21B-AS1  |             | 0           | 14.28569205 |
| 2.828262674 |             |             |             |             |
| MZT2A       | MZT2A       | 3026.823474 | 3804.404838 | 1533.926184 |
| 1743.152562 |             |             |             |             |
| ADORA1      | ADORA1      | 2.342742627 | 0           | 0           |
| C21orf119   | C21orf119   |             | 204.9899799 | 361.5504864 |
| 260.7138799 | 248.8871153 |             |             |             |
| DCAF13P3    | DCAF13P3    |             | 29.28428284 | 8.124730032 |
| 24.99996108 | 22.62610139 |             |             |             |
| ALDH5A1     | ALDH5A1     | 856.2724301 | 882.5487998 | 1410.71209  |
| 1406.589303 |             |             |             |             |
| ANKAR       | ANKAR       | 111.2802748 | 55.85751897 | 197.3211214 |
| 140.4703795 |             |             |             |             |
| STAC3       | STAC3       | 40.99799597 | 26.40537261 | 11.60712479 |
| 20.74059294 |             |             |             |             |
| WDSUB1      | WDSUB1      | 226.0746635 | 142.1827756 | 418.7493482 |
| 440.2662229 |             |             |             |             |
| CPB2-AS1    | CPB2-AS1    |             | 7.028227881 | 44.68601518 |
| 33.92851862 | 9.427542247 |             |             |             |
| MIR6884     | MIR6884     | 44.51210991 | 35.54569389 | 19.64282657 |
| 41.48118589 |             |             |             |             |
| MIR8076     | MIR8076     | 2.342742627 | 0           | 0           |
| FAM50B      | FAM50B      | 884.3853417 | 1057.230495 | 1125.891105 |
| 1039.85791  |             |             |             |             |
| SKAP2       | SKAP2       | 1576.665788 | 762.7090318 | 673.2132378 |
| 1770.492434 |             |             |             |             |
| TM9SF2      | TM9SF2      | 15894.33735 | 18276.58021 | 13589.26456 |
| 14360.03235 |             |             |             |             |
| HAR1B       | HAR1B       | 0           | 6.093547524 | 24.10710533 |
|             |             |             |             | 39.59567744 |
| WNT10B      | WNT10B      | 0           | 0           | 2.828262674 |
| L3HYPDH     | L3HYPDH     | 203.8186085 | 211.2429808 | 591.0705085 |
| 712.7221939 |             |             |             |             |
| AKR7A2P1    | AKR7A2P1    |             | 4.685485254 | 7.109138778 |
| 10.71426904 | 0           |             |             |             |
| ITPK1-AS1   | ITPK1-AS1   |             | 104.2520469 | 54.84192772 |
| 77.67845051 | 60.33627038 |             |             |             |
| ZNF248      | ZNF248      | 460.3489262 | 269.1316823 | 549.1062881 |
| 667.4699911 |             |             |             |             |
| ARMC9       | ARMC9       | 162.8206126 | 304.6773762 | 291.9638312 |

|              |              |             |             |             |             |   |
|--------------|--------------|-------------|-------------|-------------|-------------|---|
| 159.325464   |              |             |             |             |             |   |
| ZNF705E      | ZNF705E      | 7.028227881 | 10.15591254 | 33.03566286 |             |   |
| 5.656525348  |              |             |             |             |             |   |
| TTC12        | TTC12        | 209.6754651 | 223.4300759 | 430.356473  |             |   |
| 473.2626208  |              |             |             |             |             |   |
| IQCA1        | IQCA1        | 0           | 4.062365016 | 10.71426904 | 14.14131337 |   |
| SREBF2       | SREBF2       | 6573.735811 | 4736.717609 | 7813.380695 |             |   |
| 9670.772837  |              |             |             |             |             |   |
| TMEM168      | TMEM168      | 1176.056799 | 1077.542321 | 1343.747908 |             |   |
| 1465.040065  |              |             |             |             |             |   |
| LOC100996634 | LOC100996634 |             | 1.171371313 | 10.15591254 |             |   |
| 3.571423012  | 19.79783872  |             |             |             |             |   |
| MIR639       | MIR639       | 675.8812479 | 887.626756  | 594.6419315 |             |   |
| 665.5844826  |              |             |             |             |             |   |
| GJA10        | GJA10        | 3.51411394  | 2.031182508 | 0           | 0           |   |
| LHX4         | LHX4         | 10.54234182 | 13.2026863  | 36.60708587 |             |   |
| 15.0840676   |              |             |             |             |             |   |
| UQCRFS1      | UQCRFS1      | 10278.78328 | 14537.17321 | 7756.237927 |             |   |
| 8115.228366  |              |             |             |             |             |   |
| CCIN         | CCIN         | 0           | 0           | 17.91233027 |             |   |
| NRR0S        | NRR0S        | 242.4738619 | 140.1515931 | 43.7499319  |             |   |
| 64.10728728  |              |             |             |             |             |   |
| FYC01        | FYC01        | 1104.603149 | 705.8359216 | 952.6770885 |             |   |
| 1333.054474  |              |             |             |             |             |   |
| ZNF853       | ZNF853       | 29.28428284 | 3.046773762 | 149.1069108 |             |   |
| 72.5920753   |              |             |             |             |             |   |
| SPTBN5       | SPTBN5       | 40.99799597 | 18.28064257 | 45.5356434  |             |   |
| 42.42394011  |              |             |             |             |             |   |
| SLC22A10     | SLC22A10     |             | 0           | 0           | 0.942754225 |   |
| GABRA6       | GABRA6       | 0           | 0           | 0.892855753 | 0           |   |
| MERTK        | MERTK        | 78.481878   | 67.02902277 | 41.07136464 |             |   |
| 148.9551675  |              |             |             |             |             |   |
| TACC3        | TACC3        | 12364.99558 | 12310.99718 | 7036.59619  |             |   |
| 8405.596668  |              |             |             |             |             |   |
| C1GALT1C1    | C1GALT1C1    |             | 3168.559403 | 4495.00689  |             |   |
| 2732.138604  | 2547.321915  |             |             |             |             |   |
| TSR3         | TSR3         | 3701.533351 | 5932.068515 | 3939.279582 |             |   |
| 3634.317536  |              |             |             |             |             |   |
| ZIK1         | ZIK1         | 740.3066701 | 772.8649443 | 1013.39128  |             |   |
| 953.1245212  |              |             |             |             |             |   |
| PANX1        | PANX1        | 1317.792728 | 1451.279902 | 1138.391085 |             |   |
| 1204.839899  |              |             |             |             |             |   |
| PTGFRN       | PTGFRN       | 734.4498135 | 518.9671308 | 340.1780419 |             |   |
| 568.4807975  |              |             |             |             |             |   |
| GRIK3        | GRIK3        | 0           | 0           | 1.785711506 | 0           |   |
| CTBS         | CTBS         | 2352.113597 | 1710.255672 | 2233.925094 |             |   |
| 2171.16298   |              |             |             |             |             |   |
| NLRP11       | NLRP11       | 0           | 2.031182508 | 0           | 0           |   |
| LOC101928404 | LOC101928404 |             | 0           | 0           | 7.142846024 | 0 |
| PIM3         | PIM3         | 12610.98356 | 14758.5721  | 11661.58899 |             |   |

|              |              |             |             |             |             |
|--------------|--------------|-------------|-------------|-------------|-------------|
| 10444.77406  |              |             |             |             |             |
| TMEM92       | TMEM92       | 5.856856567 | 6.093547524 | 3.571423012 |             |
| 2.828262674  |              |             |             |             |             |
| CEBPZ0S      | CEBPZ0S      | 1604.778699 | 1234.958965 | 1747.318709 |             |
| 1295.344305  |              |             |             |             |             |
| CCDC103      | CCDC103      | 48.02622385 | 30.46773762 | 83.92844078 |             |
| 16.02682182  |              |             |             |             |             |
| MGME1        | MGME1        | 3143.960605 | 3907.995146 | 2371.42488  |             |
| 2235.270267  |              |             |             |             |             |
| ARSB         | ARSB         | 2078.01271  | 2095.164757 | 1291.069419 |             |
| 1275.546466  |              |             |             |             |             |
| RMI2         | RMI2         | 3278.668306 | 2752.252298 | 1550.890443 |             |
| 2565.234245  |              |             |             |             |             |
| SNHG3        | SNHG3        | 911.3268819 | 720.0541991 | 820.534437  |             |
| 834.3374889  |              |             |             |             |             |
| MKX          | MKX          | 0           | 0           | 66.96418148 | 0           |
| BAIAP2L1     | BAIAP2L1     |             |             | 40.99799597 | 30.46773762 |
| 330.3566286  | 212.1197006  |             |             |             |             |
| LOC256880    | LOC256880    |             |             | 24.59879758 | 22.34300759 |
| 158.928324   | 17.91233027  |             |             |             |             |
| SNRPC        | SNRPC        | 11553.23526 | 13953.20824 | 8302.665647 |             |
| 8823.236789  |              |             |             |             |             |
| ZNF192P1     | ZNF192P1     |             | 5.856856567 | 2.031182508 |             |
| 19.64282657  | 7.542033798  |             |             |             |             |
| ZER1         | ZER1         | 2851.117777 | 3543.397885 | 5447.312949 |             |
| 4087.782318  |              |             |             |             |             |
| RGS18        | RGS18        | 49.19759517 | 4.062365016 | 20.53568232 |             |
| 28.28262674  |              |             |             |             |             |
| MIR103A2     | MIR103A2     |             | 24.59879758 | 13.2026863  |             |
| 38.39279738  | 47.13771124  |             |             |             |             |
| MIR29B2      | MIR29B2      | 0           | 0           | 4.713771124 |             |
| TMEM158      | TMEM158      | 0           | 6.093547524 | 6.249990271 | 1.885508449 |
| HMGA1        | HMGA1        | 9642.728652 | 8965.639591 | 4624.099945 |             |
| 5815.850812  |              |             |             |             |             |
| LOC101926964 | LOC101926964 | 0           | 0           | 0           | 3.771016899 |
| ISX          | ISX          | 0           | 4.062365016 | 0           | 0           |
| MIR4274      | MIR4274      | 0           | 0           | 2.828262674 |             |
| MIR4273      | MIR4273      | 4.685485254 | 1.015591254 | 6.249990271 |             |
| 6.599279573  |              |             |             |             |             |
| DDX10        | DDX10        | 1824.996506 | 2323.672789 | 2001.782598 |             |
| 2217.357937  |              |             |             |             |             |
| CYBB         | CYBB         | 0           | 0           | 71.42846024 | 12.25580492 |
| MPPED1       | MPPED1       | 0           | 0           | 0.942754225 |             |
| FAM69C       | FAM69C       | 1.171371313 | 0           | 0           | 0           |
| TSTD1        | TSTD1        | 1951.504608 | 2362.265257 | 2355.353476 |             |
| 2421.935603  |              |             |             |             |             |
| FAM159A      | FAM159A      | 59.73993699 | 79.21611782 | 150.8926223 |             |
| 65.99279573  |              |             |             |             |             |
| CXCL2        | CXCL2        | 0           | 1.015591254 | 0           | 0           |
| MIR1539      | MIR1539      | 0           | 0           | 0.892855753 | 0           |

|              |              |             |             |             |             |
|--------------|--------------|-------------|-------------|-------------|-------------|
| MIR1537      | MIR1537      | 1.171371313 | 0           | 0           | 0           |
| MNS1         | MNS1         | 8.199599194 | 5.07795627  |             | 2.678567259 |
| 11.3130507   |              |             |             |             |             |
| MIR3687-1    | MIR3687-1    |             | 39.82662466 |             | 18.28064257 |
| 46.42849916  | 19.79783872  |             |             |             |             |
| MIR3685      | MIR3685      | 1.171371313 | 0           | 1.785711506 | 0           |
| MIR3684      | MIR3684      | 0           | 0           | 0.942754225 |             |
| MIR3682      | MIR3682      | 2.342742627 | 1.015591254 | 0           | 3.771016899 |
| MIR3679      | MIR3679      | 2.342742627 | 0           | 0           | 7.542033798 |
| PRCD         | PRCD         | 0           | 0           | 5.357134518 | 0           |
| LOC401320    | LOC401320    |             | 175.705697  |             | 108.6682642 |
| 178.5711506  | 159.325464   |             |             |             |             |
| MIR5194      | MIR5194      | 0           | 0           | 0.942754225 |             |
| LINC01250    | LINC01250    |             | 0           | 0           | 2.828262674 |
| STX7         | STX7         | 1409.15969  | 1279.64498  |             | 1084.81974  |
| 1431.100913  |              |             |             |             |             |
| FLJ37035     | FLJ37035     |             | 64.42542224 |             | 57.88870148 |
| 26.78567259  | 65.99279573  |             |             |             |             |
| LINC00891    | LINC00891    |             | 38.65525334 |             | 43.67042392 |
| 28.5713841   | 32.05364364  |             |             |             |             |
| LOC100132741 | LOC100132741 |             | 38.65525334 |             | 43.67042392 |
| 28.5713841   | 32.05364364  |             |             |             |             |
| PIM2         | PIM2         | 54879.91741 | 63063.13892 |             | 34980.30269 |
| 40146.24591  |              |             |             |             |             |
| LINC01088    | LINC01088    |             | 3.51411394  |             | 4.062365016 |
| 11.60712479  | 11.3130507   |             |             |             |             |
| OR4N3P       | OR4N3P       | 0           | 0.892855753 |             | 0           |
| PRKY         | PRKY         | 1201.826968 | 0           | 0           | 1433.929176 |
| ATP8A2       | ATP8A2       | 29.28428284 | 31.48332888 |             | 136.6069302 |
| 43.36669434  |              |             |             |             |             |
| CDC40        | CDC40        | 1366.990323 | 1427.921303 |             | 1674.104537 |
| 1994.86794   |              |             |             |             |             |
| C14orf119    | C14orf119    |             | 4998.241395 |             | 5912.772281 |
| 5781.241001  | 5098.414847  |             |             |             |             |
| ZNF354A      | ZNF354A      | 200.3044946 | 284.3655511 |             | 1004.462722 |
| 1041.743418  |              |             |             |             |             |
| TAF15        | TAF15        | 1083.518465 | 388.9714503 |             | 698.2131989 |
| 778.7149896  |              |             |             |             |             |
| CC2D1A       | CC2D1A       | 2093.240537 | 2024.073369 |             | 1654.46171  |
| 1734.667773  |              |             |             |             |             |
| OR4K14       | OR4K14       | 0           | 5.357134518 |             | 0           |
| ITGAE        | ITGAE        | 2591.073345 | 3585.037127 |             | 1618.74748  |
| 1553.658962  |              |             |             |             |             |
| OSGIN2       | OSGIN2       | 2120.182077 | 2089.07121  |             | 2767.852834 |
| 2186.247047  |              |             |             |             |             |
| PEX7         | PEX7         | 226.0746635 | 384.9090853 |             | 340.1780419 |
| 269.6277083  |              |             |             |             |             |
| PEX6         | PEX6         | 350.2400227 | 2387.655038 |             | 3097.316607 |
| 534.5416454  |              |             |             |             |             |
| PEX12        | PEX12        | 263.5585455 | 294.5214637 |             | 633.9275847 |

|                 |               |               |               |  |  |
|-----------------|---------------|---------------|---------------|--|--|
| 511.915544      |               |               |               |  |  |
| SETD8 SETD8     | 1240.482221   | 1201.444454   | 624.1061714   |  |  |
| 880.5324459     |               |               |               |  |  |
| CRYGN CRYGN     | 0 0           | 0 0.942754225 |               |  |  |
| H2AFX H2AFX     | 5865.056166   | 5958.473888   | 2231.246527   |  |  |
| 2719.845938     |               |               |               |  |  |
| H3F3A H3F3A     | 19814.91714   | 19613.0983    | 11744.62458   |  |  |
| 12954.3858      |               |               |               |  |  |
| UBE2D2 UBE2D2   | 10011.71062   | 9763.894316   | 7049.989026   |  |  |
| 6951.869653     |               |               |               |  |  |
| HIST3H3 HIST3H3 | 1.171371313   | 0 0           | 0.942754225   |  |  |
| NAP1L3 NAP1L3   | 65.59679355   | 106.6370817   | 424.9993384   |  |  |
| 269.6277083     |               |               |               |  |  |
| NAIP NAIP       | 33.96976809   | 16.24946006   | 24.99996108   |  |  |
| 28.28262674     |               |               |               |  |  |
| ECH1 ECH1       | 11313.10415   | 15670.57305   | 10303.55539   |  |  |
| 10677.63435     |               |               |               |  |  |
| RNU6-19P        | RNU6-19P      | 0 0           | 5.357134518 0 |  |  |
| RNU6-28P        | RNU6-28P      | 0 0           | 0 0.942754225 |  |  |
| ANKDD1B ANKDD1B | 10.54234182   | 8.124730032   | 1.785711506   |  |  |
| 3.771016899     |               |               |               |  |  |
| COL27A1 COL27A1 | 0 3.046773762 | 7.142846024   | 7.542033798   |  |  |
| ZNF526 ZNF526   | 1347.07701    | 1223.787461   | 1305.355111   |  |  |
| 1456.555277     |               |               |               |  |  |
| STAB1 STAB1     | 96.0524477    | 63.98224901   | 31.24995136   |  |  |
| 61.27902461     |               |               |               |  |  |
| NUP205 NUP205   | 11154.96902   | 8294.333772   | 6676.775321   |  |  |
| 7671.191127     |               |               |               |  |  |
| LARS LARS       | 7543.631259   | 8370.503116   | 8191.058678   |  |  |
| 8283.981373     |               |               |               |  |  |
| TENM4 TENM4     | 0 5.07795627  | 0             | 0             |  |  |
| LOC100506603    | LOC100506603  | 76.13913537   | 98.51235164   |  |  |
| 234.821063      | 240.4023273   |               |               |  |  |
| FLJ31306        | FLJ31306      | 800.0466071   | 441.7821955   |  |  |
| 1013.39128      | 950.2962585   |               |               |  |  |
| GPR25 GPR25     | 160.4778699   | 39.60805891   | 95.53556557   |  |  |
| 123.5008034     |               |               |               |  |  |
| PAPOLB PAPOLB   | 0 0           | 3.571423012   | 0             |  |  |
| GRAMD4 GRAMD4   | 2595.758831   | 2248.519036   | 658.9275457   |  |  |
| 1163.358713     |               |               |               |  |  |
| MIR6856 MIR6856 | 8.199599194   | 19.29623383   | 2.678567259   |  |  |
| 5.656525348     |               |               |               |  |  |
| MIR7974 MIR7974 | 1.171371313   | 0 0.892855753 | 0             |  |  |
| MIR6855 MIR6855 | 12.88508445   | 7.109138778   | 9.821413283   |  |  |
| 13.19855915     |               |               |               |  |  |
| MIR6854 MIR6854 | 5.856856567   | 0 0           | 4.713771124   |  |  |
| SNRPG SNRPG     | 15118.88954   | 15153.6371    | 9430.342464   |  |  |
| 9970.568681     |               |               |               |  |  |
| RPS9 RPS9       | 6362.888975   | 7979.500483   | 7094.631814   |  |  |
| 6589.852031     |               |               |               |  |  |



|              |              |             |             |             |             |   |
|--------------|--------------|-------------|-------------|-------------|-------------|---|
| NCF1         | NCF1         | 37.48388203 | 108.6682642 | 115.1783921 |             |   |
| 99.93194782  |              |             |             |             |             |   |
| DLEU1-AS1    | DLEU1-AS1    |             | 1.171371313 | 0           | 0           | 0 |
| YBX3P1       | YBX3P1       | 2.342742627 | 0           | 0           | 4.713771124 |   |
| LMOD2        | LMOD2        | 0           | 2.031182508 | 0           | 0           |   |
| PRR15L       | PRR15L       | 2.342742627 | 4.062365016 | 4.464278765 |             | 0 |
| TSGA10IP     | TSGA10IP     |             | 0           | 3.046773762 | 0           | 0 |
| MIR302B      | MIR302B      | 0           | 2.031182508 | 7.142846024 | 0.942754225 |   |
| URAHP        | URAHP        | 36.31251072 | 75.1537528  | 207.1425347 |             |   |
| 229.0892766  |              |             |             |             |             |   |
| IGF1R        | IGF1R        | 223.7319209 | 29.45214637 | 775.8916494 |             |   |
| 384.6437237  |              |             |             |             |             |   |
| GALNT1       | GALNT1       | 7051.655307 | 5369.43096  | 4458.028775 |             |   |
| 4624.209472  |              |             |             |             |             |   |
| ATP5J2-PTCD1 | ATP5J2-PTCD1 |             | 9381.512849 | 11742.26608 |             |   |
| 7775.880753  | 7757.924515  |             |             |             |             |   |
| EXTL1        | EXTL1        | 2.342742627 | 5.07795627  | 0           | 5.656525348 |   |
| MMP19        | MMP19        | 127.6794732 | 58.90429273 | 70.53560449 |             |   |
| 79.19135488  |              |             |             |             |             |   |
| TUBG2        | TUBG2        | 181.5625536 | 162.4946006 | 372.320849  |             |   |
| 463.8350786  |              |             |             |             |             |   |
| KHSRP        | KHSRP        | 3669.906325 | 759.662258  | 683.9275068 |             |   |
| 843.7650311  |              |             |             |             |             |   |
| CPSF2        | CPSF2        | 5701.064183 | 5950.349157 | 4448.207362 |             |   |
| 4920.234299  |              |             |             |             |             |   |
| RAP1GAP2     | RAP1GAP2     |             | 461.5202975 | 218.3521196 |             |   |
| 98.21413283  | 53.73699081  |             |             |             |             |   |
| MIR26A2      | MIR26A2      | 5.856856567 | 3.046773762 | 0           | 0           |   |
| ZNF518B      | ZNF518B      | 1154.972115 | 793.1767694 | 1329.462216 |             |   |
| 1355.680575  |              |             |             |             |             |   |
| ZBTB20-AS1   | ZBTB20-AS1   |             | 14.05645576 | 22.34300759 |             |   |
| 115.1783921  | 79.19135488  |             |             |             |             |   |
| CLLU1        | CLLU1        | 2.342742627 | 4.062365016 | 8.92855753  |             | 0 |
| CXorf65      | CXorf65      | 209.6754651 | 293.5058724 | 326.7852056 |             |   |
| 265.8566914  |              |             |             |             |             |   |
| GTF2H2C      | GTF2H2C      | 733.2784422 | 885.5955735 | 673.2132378 |             |   |
| 960.666555   |              |             |             |             |             |   |
| ILDR2        | ILDR2        | 181.5625536 | 99.5279429  | 53.57134518 |             |   |
| 159.325464   |              |             |             |             |             |   |
| SFT2D2       | SFT2D2       | 1556.752476 | 1262.379929 | 949.9985212 |             |   |
| 1235.950789  |              |             |             |             |             |   |
| ZNF256       | ZNF256       | 346.7259088 | 332.0983401 | 641.9632864 |             |   |
| 507.2017729  |              |             |             |             |             |   |
| FOXD1        | FOXD1        | 1.171371313 | 6.093547524 | 0.892855753 |             |   |
| 3.771016899  |              |             |             |             |             |   |
| TMEM102      | TMEM102      | 911.3268819 | 1370.032602 | 903.5700221 |             |   |
| 968.2085888  |              |             |             |             |             |   |
| SULT2A1      | SULT2A1      | 0           | 0           | 0.942754225 |             |   |
| HIST1H2BE    | HIST1H2BE    |             | 9.370970508 | 9.140321286 |             |   |
| 1.785711506  | 8.484788022  |             |             |             |             |   |

|                 |                 |               |             |  |
|-----------------|-----------------|---------------|-------------|--|
| GOLGA2P5        | GOLGA2P5        | 230.7601488   | 99.5279429  |  |
| 179.4640064     | 146.1269048     |               |             |  |
| PLIN5 PLIN5     | 1.171371313     | 1.015591254   | 7.142846024 |  |
| 8.484788022     |                 |               |             |  |
| MTG2 MTG2       | 1489.984311     | 1824.001892   | 2304.460699 |  |
| 1808.202603     |                 |               |             |  |
| NHP2 NHP2       | 7558.859086     | 11337.04517   | 7862.487761 |  |
| 7661.763584     |                 |               |             |  |
| QSER1 QSER1     | 237.7883766     | 113.7462205   | 278.5709949 |  |
| 258.3146576     |                 |               |             |  |
| MEIS3 MEIS3     | 0 0             | 1.785711506   | 2.828262674 |  |
| GRIPAP1 GRIPAP1 | 2616.843514     | 2148.991094   | 2477.674715 |  |
| 2375.740646     |                 |               |             |  |
| PRDM9 PRDM9     | 0 0             | 0 0.942754225 |             |  |
| ATP6V0D1        | ATP6V0D1        | 7811.875289   | 10988.69737 |  |
| 6529.454122     | 5395.382428     |               |             |  |
| ERI3 ERI3       | 2039.357457     | 2739.049612   | 1862.497101 |  |
| 1785.576502     |                 |               |             |  |
| TIFA TIFA       | 2589.901974     | 1981.418537   | 2849.102708 |  |
| 3643.745079     |                 |               |             |  |
| SCGB3A1 SCGB3A1 | 0 3.046773762 0 | 0             | 0           |  |
| MIR4800 MIR4800 | 106.5947895     | 125.9333155   | 125.8926612 |  |
| 154.6116929     |                 |               |             |  |
| MIR5047 MIR5047 | 1126.859204     | 673.3370014   | 2097.318164 |  |
| 2446.447213     |                 |               |             |  |
| MIR4804 MIR4804 | 2.342742627     | 0 0           | 0           |  |
| VWA8-AS1        | VWA8-AS1        | 5.856856567   | 2.031182508 |  |
| 41.96422039     | 0               |               |             |  |
| MRPL22 MRPL22   | 4793.251415     | 5500.442232   | 3508.923109 |  |
| 3955.796727     |                 |               |             |  |
| TRIM28 TRIM28   | 11456.01145     | 13087.92449   | 11071.41134 |  |
| 10848.27286     |                 |               |             |  |
| GPR12 GPR12     | 0 0             | 1.785711506   | 0           |  |
| MY01F MY01F     | 20222.55436     | 21443.19374   | 2563.388867 |  |
| 5663.124628     |                 |               |             |  |
| FAHD2B FAHD2B   | 855.1010588     | 1153.711665   | 771.4273706 |  |
| 949.3535043     |                 |               |             |  |
| BECN1 BECN1     | 8813.397762     | 10369.1867    | 8874.093329 |  |
| 9362.492206     |                 |               |             |  |
| FAM114A2        | FAM114A2        | 1738.315029   | 1821.97071  |  |
| 1683.033094     | 2058.032473     |               |             |  |
| INTS3 INTS3     | 3355.978813     | 2938.105498   | 2820.531324 |  |
| 2620.856745     |                 |               |             |  |
| NT5C2 NT5C2     | 7141.850898     | 6414.474361   | 4117.850733 |  |
| 5341.645437     |                 |               |             |  |
| C9orf114        | C9orf114        | 4951.386542   | 6648.060349 |  |
| 5394.63446      | 5340.702683     |               |             |  |
| DNAJB13 DNAJB13 | 9.370970508     | 19.29623383   | 14.28569205 |  |
| 8.484788022     |                 |               |             |  |
| LINC01097       | LINC01097       | 2.342742627   | 0 0 0       |  |

|              |              |             |             |             |             |   |
|--------------|--------------|-------------|-------------|-------------|-------------|---|
| ZNF705G      | ZNF705G      | 1.171371313 | 0           | 0           | 0           |   |
| C6orf132     | C6orf132     | 3.571423012 | 1.171371313 | 5.07795627  |             |   |
| CBY3         | CBY3         | 20.74059294 | 7.109138778 | 41.07136464 |             |   |
| ANKRD31      | ANKRD31      | 85.79063445 | 18.28064257 | 85.71415229 |             |   |
| MIR4637      | MIR4637      | 4.685485254 | 2.031182508 | 0           | 0           |   |
| MIR4633      | MIR4633      | 1.171371313 | 1.015591254 | 0           | 1.885508449 |   |
| MIR4632      | MIR4632      | 108.4167358 | 254.9134048 | 65.17846997 |             |   |
| ROGDI        | ROGDI        | 413.8691047 | 780.9896744 | 391.0708198 |             |   |
| C15orf54     | C15orf54     | 13.19855915 | 0           | 4.062365016 | 0           |   |
| DNAH10       | DNAH10       | 15.0840676  | 35.54569389 | 47.32135491 |             |   |
| FAM223B      | FAM223B      | 6.599279573 | 1.015591254 | 4.464278765 |             |   |
| FLJ36777     | FLJ36777     | 15.1785478  | 4.685485254 | 2.031182508 |             |   |
| LOC283788    | LOC283788    | 3458.923187 | 2375.541024 | 3150.36407  |             |   |
| MIR4308      | MIR4308      | 2.342742627 | 1.015591254 | 7.142846024 | 0           |   |
| RPS6         | RPS6         | 30933.65162 | 31679.33799 | 34637.44608 |             |   |
| OR6C68       | OR6C68       | 2.342742627 | 0           | 0           | 0           |   |
| TRPA1        | TRPA1        | 41.48118589 | 6.093547524 | 16.96425931 |             |   |
| LOC100130075 | LOC100130075 | 475.1481293 | 2.342742627 | 0           | 0           | 0 |
| SCARB1       | SCARB1       | 475.1481293 | 612.4015262 | 371.4279933 |             |   |
| FUOM         | FUOM         | 854.1353276 | 498.6553057 | 618.7490368 |             |   |
| LOC101928303 | LOC101928303 | 3.571423012 | 5.856856567 | 4.062365016 |             |   |
| OGFR         | OGFR         | 6277.800382 | 5846.75885  | 9816.949005 |             |   |
| SIX3         | SIX3         | 0           | 43.67042392 | 1.785711506 | 0           |   |
| NID2         | NID2         | 42.42394011 | 49.19759517 | 124.9177242 | 104.4641231 |   |
| BGLAP        | BGLAP        | 207.4059294 | 141.1671843 | 125.8926612 |             |   |
| CCDC80       | CCDC80       | 5.357134518 | 3.046773762 | 0           | 0           |   |
| LINC01227    | LINC01227    | 5.357134518 | 5.856856567 | 3.046773762 |             |   |
| ZNF497       | ZNF497       | 343.1625378 | 215.3053459 | 454.4635783 |             |   |
| AP00L        | AP00L        | 308.2806315 | 405.2209104 | 253.5710339 |             |   |

|           |           |             |             |   |             |
|-----------|-----------|-------------|-------------|---|-------------|
| RPS4Y1    | RPS4Y1    | 4582.404578 | 0           | 0 | 4773.16464  |
| RPL7A     | RPL7A     | 10878.52539 | 13143.78201 |   | 11249.08963 |
|           |           | 10951.03307 |             |   |             |
| TMTC1     | TMTC1     | 29.28428284 | 7.109138778 |   | 4.464278765 |
| SIGLEC14  | SIGLEC14  |             | 1.171371313 |   | 0           |
|           |           | 3.771016899 |             |   | 2.678567259 |
| SDR42E1   | SDR42E1   | 250.6734611 | 611.3859349 |   | 390.1779641 |
|           |           | 502.4880018 |             |   |             |
| THAP6     | THAP6     | 996.8369878 | 855.1278359 |   | 1391.069263 |
|           |           | 1438.642947 |             |   |             |
| SLM02     | SLM02     | 5180.975319 | 4176.111237 |   | 4025.88659  |
|           |           | 3909.60177  |             |   |             |
| ZNRF2     | ZNRF2     | 1013.236186 | 1351.751959 |   | 1370.533581 |
|           |           | 1368.879134 |             |   |             |
| ESRP2     | ESRP2     | 279.9577439 | 168.5881482 |   | 143.7497762 |
|           |           | 191.3791076 |             |   |             |
| TMEM69    | TMEM69    | 1823.825135 | 2122.585721 |   | 2351.782053 |
|           |           | 2368.198612 |             |   |             |
| VTA1      | VTA1      | 6718.985854 | 7636.230639 |   | 7725.880831 |
|           |           | 7295.032191 |             |   |             |
| LACTB2    | LACTB2    | 1031.978127 | 916.0633112 |   | 1158.033912 |
|           |           | 1130.362315 |             |   |             |
| RBMX2     | RBMX2     | 810.5889489 | 768.8025793 |   | 582.141951  |
|           |           | 732.5200326 |             |   |             |
| PCED1A    | PCED1A    | 185.0766675 | 165.5413744 |   | 470.5349818 |
|           |           | 444.0372398 |             |   |             |
| C11orf31  | C11orf31  |             | 5077.894644 |   | 7919.580599 |
|           |           | 4881.242402 |             |   |             |
| LYPLA2P2  | LYPLA2P2  |             | 2.342742627 |   | 5.07795627  |
|           |           | 2.678567259 |             |   |             |
| MLK7-AS1  | MLK7-AS1  |             | 547.0304034 |   | 615.4483    |
|           |           | 147.3211993 |             |   |             |
| LOC653712 | LOC653712 |             | 21.08468364 |   | 22.34300759 |
|           |           | 44.64278765 |             |   |             |
| ANGEL1    | ANGEL1    | 1266.25239  | 1370.032602 |   | 2412.496245 |
|           |           | 1921.33311  |             |   |             |
| OXCT2     | OXCT2     | 14.05645576 | 9.140321286 |   | 10.71426904 |
|           |           | 16.02682182 |             |   |             |
| MAP10     | MAP10     | 169.8488405 | 146.2451406 |   | 135.7140745 |
|           |           | 196.0928787 |             |   |             |
| RIMS2     | RIMS2     | 2.342742627 | 3.046773762 |   | 0.892855753 |
|           |           | 0.942754225 |             |   |             |
| GAB2      | GAB2      | 339.6976809 | 257.9601785 |   | 87.4998638  |
|           |           | 91.4471598  |             |   |             |
| FAIM2     | FAIM2     | 29.28428284 | 10.15591254 |   | 37.49994163 |
|           |           | 76.3630922  |             |   |             |
| TIMM44    | TIMM44    | 1451.329057 | 1764.082008 |   | 1908.9256   |
|           |           | 1573.456801 |             |   |             |
| CENPF     | CENPF     | 5402.364498 | 4861.635333 |   | 1596.426086 |
|           |           | 3010.21424  |             |   |             |

|              |              |             |             |             |   |
|--------------|--------------|-------------|-------------|-------------|---|
| MACF1        | MACF1        | 8365.933921 | 4701.171915 | 3601.780108 |   |
| 5044.677856  |              |             |             |             |   |
| SLC27A4      | SLC27A4      | 1819.13965  | 1686.897073 | 990.1770301 |   |
| 879.5896917  |              |             |             |             |   |
| NNMT         | NNMT         | 0           | 1.015591254 | 0           | 0 |
| LOC100129935 | LOC100129935 | 0           | 1.015591254 | 0           | 0 |
| SNORD8       | SNORD8       | 11.71371313 | 2.031182508 | 11.60712479 |   |
| 16.96957604  |              |             |             |             |   |
| WAC-AS1      | WAC-AS1      | 496.6614369 | 492.5617582 | 730.356006  |   |
| 741.9475749  |              |             |             |             |   |
| MIR659       | MIR659       | 2.342742627 | 0           | 2.678567259 | 0 |
| SPRNP1       | SPRNP1       | 0           | 4.062365016 | 0           | 0 |
| CTGLF12P     | CTGLF12P     |             | 8.199599194 | 4.062365016 |   |
| 2.678567259  | 5.656525348  |             |             |             |   |
| GYG2P1       | GYG2P1       | 0           | 0           | 2.828262674 |   |
| LOC389705    | LOC389705    |             | 4.685485254 | 5.07795627  |   |
| 45.5356434   | 15.0840676   |             |             |             |   |
| SNORD121A    | SNORD121A    |             | 1.171371313 | 2.031182508 | 0 |
| 0.942754225  |              |             |             |             |   |
| CTNNAL1      | CTNNAL1      | 1937.448152 | 1829.079849 | 944.6413867 |   |
| 842.8222769  |              |             |             |             |   |
| GUSBP4       | GUSBP4       | 284.6432292 | 287.4123249 | 441.9635978 |   |
| 542.0836792  |              |             |             |             |   |
| LOC101060321 | LOC101060321 |             | 69.11090749 | 30.46773762 |   |
| 64.28561422  | 82.01961755  |             |             |             |   |
| XRCC6P5      | XRCC6P5      | 0           | 2.031182508 | 0           | 0 |
| LINC01194    | LINC01194    |             | 2.342742627 | 0           | 0 |
| 2.828262674  |              |             |             |             |   |
| NLRP6        | NLRP6        | 154.6210134 | 237.6483534 | 752.6773998 |   |
| 586.3931278  |              |             |             |             |   |
| REX04        | REX04        | 1741.829143 | 2639.521669 | 2963.388244 |   |
| 2362.542087  |              |             |             |             |   |
| ZNF730       | ZNF730       | 91.36696245 | 14.21827756 | 3.571423012 |   |
| 36.76741476  |              |             |             |             |   |
| SPR          | SPR          | 115.96576   | 154.3698706 | 283.0352737 |   |
| 197.035633   |              |             |             |             |   |
| OARD1        | OARD1        | 1846.08119  | 2116.492173 | 2545.531752 |   |
| 2618.028482  |              |             |             |             |   |
| TNFAIP8L3    | TNFAIP8L3    |             | 1.171371313 | 26.40537261 |   |
| 19.64282657  | 64.10728728  |             |             |             |   |
| TOMM20L      | TOMM20L      | 98.39519033 | 67.02902277 | 76.78559476 |   |
| 113.130507   |              |             |             |             |   |
| ANGPTL2      | ANGPTL2      | 0           | 2.031182508 | 0           | 0 |
| DPF3         | DPF3         | 127.6794732 | 88.3564391  | 33.92851862 |   |
| 21.68334717  |              |             |             |             |   |
| APOBEC3G     | APOBEC3G     |             | 11625.86029 | 17571.75988 |   |
| 7063.381862  | 6884.934103  |             |             |             |   |
| ZNF571-AS1   | ZNF571-AS1   |             | 77.31050669 | 71.09138778 |   |
| 188.3925639  | 152.7261844  |             |             |             |   |
| LOC286059    | LOC286059    |             | 8.199599194 | 5.07795627  |   |

|                 |              |             |   |             |   |
|-----------------|--------------|-------------|---|-------------|---|
| 38.39279738     | 0            |             |   |             |   |
| LINC01342       | LINC01342    | 0           | 0 | 3.571423012 | 0 |
| TWF1 TWF1       | 1616.492413  | 1573.150853 |   | 1575.890404 |   |
| 1857.225823     |              |             |   |             |   |
| MIR3199-1       | MIR3199-1    | 0           | 0 | 3.571423012 | 0 |
| MIR3198-1       | MIR3198-1    | 3.51411394  |   | 1.015591254 |   |
| 5.357134518     | 5.656525348  |             |   |             |   |
| RAB30-AS1       | RAB30-AS1    | 325.6412251 |   | 381.8623115 |   |
| 514.2849137     | 378.0444441  |             |   |             |   |
| FAM78B FAM78B   | 2.342742627  | 36.56128515 | 0 | 9.427542247 |   |
| AASS AASS       | 241.3024906  | 128.9800893 |   | 88.39271955 |   |
| 264.9139371     |              |             |   |             |   |
| C11orf58        | C11orf58     | 10359.6079  |   | 10157.94372 |   |
| 10138.37708     | 11253.65718  |             |   |             |   |
| SF3B6 SF3B6     | 5464.447177  | 5110.45519  |   | 4638.385637 |   |
| 5009.79595      |              |             |   |             |   |
| LMAN1 LMAN1     | 9980.083591  | 11089.2409  |   | 7880.344876 |   |
| 9703.769235     |              |             |   |             |   |
| NCCRP1 NCCRP1   | 0 0          | 1.785711506 |   | 2.828262674 |   |
| C14orf169       | C14orf169    | 2341.571256 |   | 3142.23934  |   |
| 3700.887096     | 3189.337542  |             |   |             |   |
| PDZD11 PDZD11   | 2006.55906   | 2266.799679 |   | 1198.212421 |   |
| 1243.492822     |              |             |   |             |   |
| RENBP RENBP     | 126.5081019  | 67.02902277 |   | 218.7496595 |   |
| 122.5580492     |              |             |   |             |   |
| ZMYM4 ZMYM4     | 2354.45634   | 1818.923936 |   | 1601.783221 |   |
| 2106.112938     |              |             |   |             |   |
| MIR421 MIR421   | 10.54234182  | 4.062365016 |   | 1.785711506 |   |
| 4.713771124     |              |             |   |             |   |
| LOC439994       | LOC439994    | 103.0806756 |   | 211.2429808 |   |
| 264.2853029     | 103.7029647  |             |   |             |   |
| CD180 CD180     | 52.71170911  | 77.18493531 |   | 1.785711506 |   |
| 7.542033798     |              |             |   |             |   |
| LOC100192426    | LOC100192426 | 1.171371313 |   | 1.015591254 | 0 |
| 0.942754225     |              |             |   |             |   |
| TMEM45B TMEM45B | 4.685485254  | 57.88870148 |   | 614.2847581 |   |
| 272.4559709     |              |             |   |             |   |
| WIZ WIZ         | 189.7621528  | 98.51235164 |   | 165.1783143 |   |
| 106.5312274     |              |             |   |             |   |
| EHD1 EHD1       | 8955.133691  | 10058.41578 |   | 7066.060429 |   |
| 6591.737539     |              |             |   |             |   |
| LOC102724601    | LOC102724601 | 48.02622385 |   | 43.67042392 |   |
| 66.96418148     | 28.28262674  |             |   |             |   |
| PAN3-AS1        | PAN3-AS1     | 63.25405093 |   | 51.79515396 |   |
| 116.9641036     | 45.25220279  |             |   |             |   |
| VKORC1L1        | VKORC1L1     | 1675.060978 |   | 875.439661  |   |
| 583.0348067     | 886.1889712  |             |   |             |   |
| LEF1-AS1        | LEF1-AS1     | 841.0446031 |   | 987.1546989 |   |
| 1726.783026     | 1332.11172   |             |   |             |   |
| FAM160A1        | FAM160A1     | 0           | 0 | 1.785711506 |   |

|                 |                 |               |               |             |
|-----------------|-----------------|---------------|---------------|-------------|
| 21.68334717     |                 |               |               |             |
| LOC100128398    | LOC100128398    | 62.08267961   | 53.82633646   |             |
| 191.0711311     | 131.0428372     |               |               |             |
| BEND3 BEND3     | 278.7863726     | 164.5257832   | 166.9640258   |             |
| 129.1573288     |                 |               |               |             |
| TRIM72 TRIM72   | 0 1.015591254 0 | 0             |               |             |
| PALM2 PALM2     | 26.94154021     | 1.015591254   | 0             | 16.02682182 |
| LOC728613       | LOC728613       | 112.4516461   | 108.6682642   |             |
| 180.3568621     | 182.8943196     |               |               |             |
| BCAS2 BCAS2     | 3790.55757      | 4672.73536    | 4100.886474   |             |
| 4029.331556     |                 |               |               |             |
| BTBD6 BTBD6     | 2368.512796     | 3872.449452   | 2309.817833   |             |
| 2399.309502     |                 |               |               |             |
| RNASET2 RNASET2 | 3292.724762     | 2465.855565   | 4179.45778    |             |
| 5618.815179     |                 |               |               |             |
| NDUFA6 NDUFA6   | 7561.201828     | 8796.035851   | 5915.169364   |             |
| 5802.652253     |                 |               |               |             |
| PLCG1 PLCG1     | 7151.221869     | 2115.476582   | 2374.996303   |             |
| 2707.590133     |                 |               |               |             |
| PTOV1 PTOV1     | 2456.365644     | 2859.904971   | 3237.49496    |             |
| 2658.566914     |                 |               |               |             |
| CA11 CA11       | 44.51210991     | 19.29623383   | 183.0354294   |             |
| 117.8442781     |                 |               |               |             |
| DUOX2 DUOX2     | 0 0             | 0 0.942754225 |               |             |
| HCN2 HCN2       | 10.54234182     | 1.015591254   | 0.892855753   |             |
| 5.656525348     |                 |               |               |             |
| CCDC19 CCDC19   | 16.39919839     | 53.82633646   | 20.53568232   |             |
| 10.37029647     |                 |               |               |             |
| PTF1A PTF1A     | 0 0             | 0.892855753   | 0             |             |
| PDZD2 PDZD2     | 26.94154021     | 8.124730032   | 73.21417175   |             |
| 20.74059294     |                 |               |               |             |
| AGMAT AGMAT     | 1653.976295     | 1767.128782   | 882.141484    |             |
| 1181.271044     |                 |               |               |             |
| MMRN2 MMRN2     | 10.54234182     | 2.031182508   | 0 0           |             |
| EIF3J-AS1       | EIF3J-AS1       | 347.8972801   | 272.1784561   |             |
| 808.9273122     | 691.9816009     |               |               |             |
| FAM127A FAM127A | 886.7280843     | 1045.0434     | 934.8199734   |             |
| 1131.30507      |                 |               |               |             |
| LOC101927416    | LOC101927416    | 0 0           | 0 0.942754225 |             |
| CCDC157 CCDC157 | 487.2904664     | 414.3612317   | 369.6422818   |             |
| 389.3574948     |                 |               |               |             |
| ME1 ME1         | 70.28227881     | 12.18709505   | 57.14276819   |             |
| 95.2181767      |                 |               |               |             |
| NBEAL1 NBEAL1   | 404.1231031     | 226.4768497   | 341.9637534   |             |
| 353.5328343     |                 |               |               |             |
| MIR637 MIR637   | 4.685485254     | 4.062365016   | 0.892855753   |             |
| 0.942754225     |                 |               |               |             |
| MIR636 MIR636   | 2353.284969     | 3629.723142   | 2159.818067   |             |
| 2099.513658     |                 |               |               |             |
| MIR635 MIR635   | 2.342742627     | 4.062365016   | 0             | 14.14131337 |

|             |             |             |             |             |             |
|-------------|-------------|-------------|-------------|-------------|-------------|
| MIR632      | MIR632      | 586.857028  | 574.8246498 | 389.2851083 |             |
| 483.6329173 |             |             |             |             |             |
| MIR631      | MIR631      | 0           | 4.062365016 | 4.464278765 | 2.828262674 |
| LINC00184   | LINC00184   | 0           | 0           | 9.821413283 |             |
| 2.828262674 |             |             |             |             |             |
| LOC389247   | LOC389247   |             | 21.08468364 | 15.23386881 |             |
| 36.60708587 | 43.36669434 |             |             |             |             |
| MIR564      | MIR564      | 51.54033779 | 56.87311023 | 76.78559476 |             |
| 60.33627038 |             |             |             |             |             |
| MIR558      | MIR558      | 0           | 1.015591254 | 2.678567259 | 0           |
| MIR555      | MIR555      | 11.71371313 | 8.124730032 | 43.7499319  |             |
| 35.82466054 |             |             |             |             |             |
| RANBP10     | RANBP10     | 2198.663955 | 2367.343213 | 1691.068796 |             |
| 1754.465612 |             |             |             |             |             |
| SLAIN2      | SLAIN2      | 3699.190608 | 3108.724829 | 3081.245204 |             |
| 3124.287501 |             |             |             |             |             |
| STEAP1      | STEAP1      | 2.342742627 | 15.23386881 | 0           | 24.51160984 |
| SULT1E1     | SULT1E1     | 0           | 0           | 1.885508449 |             |
| MRPL53      | MRPL53      | 1915.192098 | 1783.378242 | 1216.962391 |             |
| 1061.541257 |             |             |             |             |             |
| NDUFB1      | NDUFB1      | 3849.126136 | 3189.972129 | 2314.282112 |             |
| 2197.560098 |             |             |             |             |             |
| MIR718      | MIR718      | 1.171371313 | 9.140321286 | 6.249990271 |             |
| 3.771016899 |             |             |             |             |             |
| MIR2277     | MIR2277     | 50.36896648 | 62.96665775 | 45.5356434  |             |
| 64.10728728 |             |             |             |             |             |
| MIR2276     | MIR2276     | 7.028227881 | 14.21827756 | 4.464278765 |             |
| 1.885508449 |             |             |             |             |             |
| LMNB2       | LMNB2       | 9999.996903 | 10308.25123 | 4681.242713 |             |
| 5266.225099 |             |             |             |             |             |
| MIAT        | MIAT        | 5260.628569 | 1021.684802 | 1508.033367 |             |
| 2409.679798 |             |             |             |             |             |
| DLGAP1-AS4  | DLGAP1-AS4  | 0           | 0           | 1.785711506 | 0           |
| YTHDF3-AS1  | YTHDF3-AS1  | 44.64278765 | 45.68348122 | 46.71719769 |             |
| 44.64278765 | 42.42394011 |             |             |             |             |
| SLC10A1     | SLC10A1     | 0           | 7.109138778 | 17.85711506 | 3.771016899 |
| INHBA       | INHBA       | 0           | 1.015591254 | 0           | 85.79063445 |
| IL17A       | IL17A       | 472.0626393 | 26.40537261 | 5.357134518 |             |
| 1466.925574 |             |             |             |             |             |
| ZNF649      | ZNF649      | 501.3469222 | 394.0494066 | 1049.10551  |             |
| 954.0672754 |             |             |             |             |             |
| POLG2       | POLG2       | 543.5162894 | 585.9961536 | 636.6061519 |             |
| 606.1909665 |             |             |             |             |             |
| PROSER3     | PROSER3     | 531.8025763 | 263.0381348 | 293.7495427 |             |
| 351.6473258 |             |             |             |             |             |
| MIR1244-1   | MIR1244-1   |             | 8910.621581 | 8917.906802 |             |
| 7433.024144 | 7996.441334 |             |             |             |             |
| C17orf47    | C17orf47    |             | 1.171371313 | 6.093547524 | 0           |
|             | 21.68334717 |             |             |             |             |
| PDIA5       | PDIA5       | 397.0948753 | 654.0407676 | 261.6067356 |             |



|               |               |             |             |             |             |   |
|---------------|---------------|-------------|-------------|-------------|-------------|---|
| 374.2734272   |               |             |             |             |             |   |
| LINC00942     | LINC00942     |             | 2.342742627 | 0           | 0           | 0 |
| LOC100422737  | LOC100422737  |             | 0           | 0           | 7.142846024 | 0 |
| DKFZp779M0652 | DKFZp779M0652 |             | 0           | 3.046773762 | 7.142846024 |   |
|               | 5.656525348   |             |             |             |             |   |
| NKAPP1        | NKAPP1        | 50.36896648 | 49.76397145 |             | 141.9640647 |   |
|               | 116.9015239   |             |             |             |             |   |
| LOC646719     | LOC646719     |             | 215.5323217 |             | 167.5725569 |   |
|               | 269.6424374   | 425.1821553 |             |             |             |   |
| KLF3          | KLF3          | 5491.388718 | 3907.995146 |             | 3885.708237 |   |
|               | 3478.763089   |             |             |             |             |   |
| CCDC6         | CCDC6         | 1234.625364 | 735.2880679 |             | 767.8559476 |   |
|               | 1209.55367    |             |             |             |             |   |
| LAD1          | LAD1          | 0           | 0           | 0           | 20.74059294 |   |
| MKL2          | MKL2          | 689.9377036 | 316.8644713 |             | 241.9639091 |   |
|               | 501.5452475   |             |             |             |             |   |
| ASF1A         | ASF1A         | 5945.880787 | 8650.806302 |             | 8841.950522 |   |
|               | 5764.942084   |             |             |             |             |   |
| SUCLA2        | SUCLA2        | 4712.426794 | 5229.279367 |             | 2768.74569  |   |
|               | 3496.675419   |             |             |             |             |   |
| ZZEF1         | ZZEF1         | 2206.863555 | 901.8450336 |             | 1810.711467 |   |
|               | 1601.739428   |             |             |             |             |   |
| MIR148B       | MIR148B       | 0           | 0           | 0           | 1.885508449 |   |
| MIR17HG       | MIR17HG       | 65.59679355 | 40.62365016 |             | 92.85699832 |   |
|               | 79.19135488   |             |             |             |             |   |
| CCNL1         | CCNL1         | 3716.761178 | 2717.722196 |             | 5697.31256  |   |
|               | 5432.149843   |             |             |             |             |   |
| NDUFS5        | NDUFS5        | 10972.23509 | 8630.494477 |             | 5472.31291  |   |
|               | 7522.235959   |             |             |             |             |   |
| DOCK2         | DOCK2         | 26033.72744 | 23078.29566 |             | 10623.19775 |   |
|               | 15690.25856   |             |             |             |             |   |
| SLPI          | SLPI          | 0           | 0           | 0           | 2.828262674 |   |
| S100A7        | S100A7        | 0           | 0           | 3.571423012 | 0           |   |
| SLIT3         | SLIT3         | 1.171371313 | 1.015591254 |             | 0           | 0 |
| TAAR3         | TAAR3         | 0           | 2.031182508 | 0           | 0           |   |
| ADAM21        | ADAM21        | 0           | 3.046773762 | 17.85711506 | 12.25580492 |   |
| SMC04         | SMC04         | 3415.71875  | 3109.74042  |             | 720.5345927 |   |
|               | 1515.948793   |             |             |             |             |   |
| SFT2D3        | SFT2D3        | 449.8065844 | 495.608532  |             | 560.7134129 |   |
|               | 638.2446101   |             |             |             |             |   |
| TRPV5         | TRPV5         | 0           | 0           | 0.892855753 | 0           |   |
| MIR553        | MIR553        | 0           | 1.015591254 | 0.892855753 | 0           |   |
| KCNH3         | KCNH3         | 92.53833376 | 46.71719769 |             | 217.8568037 |   |
|               | 145.1841506   |             |             |             |             |   |
| SGMS1         | SGMS1         | 3446.174404 | 3608.395726 |             | 1674.104537 |   |
|               | 1965.642559   |             |             |             |             |   |
| LSG1          | LSG1          | 4236.850041 | 5292.246025 |             | 6039.276313 |   |
|               | 4382.864391   |             |             |             |             |   |
| MIR1256       | MIR1256       | 1.171371313 | 0           | 0.892855753 | 2.828262674 |   |
| PRKCH         | PRKCH         | 21432.58092 | 23241.80585 |             | 14826.76263 |   |

|              |              |             |             |             |             |             |
|--------------|--------------|-------------|-------------|-------------|-------------|-------------|
| 16244.59805  |              |             |             |             |             |             |
| CYSTM1       | CYSTM1       | 417.0081876 |             | 743.412798  |             | 1058.034067 |
| 793.7990572  |              |             |             |             |             |             |
| UNC80        | UNC80        | 0           | 0           | 20.53568232 |             | 0           |
| ADAM30       | ADAM30       | 0           | 0           | 0           | 0.942754225 |             |
| ACE2         | ACE2         | 2.342742627 |             | 0           | 6.249990271 | 0           |
| DDN          | DDN          | 0           | 9.140321286 | 0.892855753 |             | 1.885508449 |
| SRGAP2       | SRGAP2       | 2575.845518 |             | 2165.240554 |             | 1216.962391 |
| 1270.832695  |              |             |             |             |             |             |
| SPAG5        | SPAG5        | 13849.12304 |             | 15023.64142 |             | 4639.278493 |
| 6860.422493  |              |             |             |             |             |             |
| PMVK         | PMVK         | 3951.03544  |             | 5443.569122 |             | 2622.317347 |
| 2882.942419  |              |             |             |             |             |             |
| LOC100506472 | LOC100506472 |             |             | 38.65525334 |             | 32.49892013 |
| 62.49990271  | 23.56885562  |             |             |             |             |             |
| HINT2        | HINT2        | 3058.450499 |             | 3453.010264 |             | 2050.889665 |
| 2025.036075  |              |             |             |             |             |             |
| UBLCP1       | UBLCP1       | 3587.910333 |             | 3720.110764 |             | 3281.244892 |
| 3636.203045  |              |             |             |             |             |             |
| RNF5P1       | RNF5P1       | 12.88508445 |             | 16.24946006 |             | 16.07140355 |
| 5.656525348  |              |             |             |             |             |             |
| LOC90784     | LOC90784     |             |             | 151.1068994 |             | 95.46557788 |
| 70.53560449  | 123.5008034  |             |             |             |             |             |
| FLJ36000     | FLJ36000     |             |             | 0           | 0           | 6.249990271 |
| GOLGA1       | GOLGA1       | 620.8267961 |             | 631.69776   |             | 1077.676894 |
| 1008.74702   |              |             |             |             |             |             |
| ZSCAN12P1    | ZSCAN12P1    |             |             | 43.3407386  |             | 35.54569389 |
| 30.3570956   | 34.88190631  |             |             |             |             |             |
| BTNL10       | BTNL10       | 4.685485254 |             | 0           | 20.53568232 | 16.96957604 |
| NPTXR        | NPTXR        | 24.59879758 |             | 11.17150379 |             | 95.53556557 |
| 56.56525348  |              |             |             |             |             |             |
| MCF2L2       | MCF2L2       | 152.2782708 |             | 107.6526729 |             | 149.9997665 |
| 160.2682182  |              |             |             |             |             |             |
| CCDC18       | CCDC18       | 978.0950467 |             | 588.0273361 |             | 354.463734  |
| 671.241008   |              |             |             |             |             |             |
| AS3MT        | AS3MT        | 11.71371313 |             | 14.21827756 |             | 20.53568232 |
| 15.0840676   |              |             |             |             |             |             |
| ARHGAP44     | ARHGAP44     |             |             | 28.11291152 |             | 22.34300759 |
| 37.49994163  | 32.99639787  |             |             |             |             |             |
| TBC1D24      | TBC1D24      | 399.4376179 |             | 174.6816957 |             | 150.8926223 |
| 148.0124133  |              |             |             |             |             |             |
| GPR141       | GPR141       | 0           | 0           | 6.249990271 |             | 0.942754225 |
| SH3GL1P2     | SH3GL1P2     |             |             | 0           | 4.062365016 | 0           |
| SH3GL1P1     | SH3GL1P1     |             |             | 21.08468364 |             | 10.15591254 |
| 8.035701777  | 13.19855915  |             |             |             |             |             |
| ATF7IP       | ATF7IP       | 6841.979842 |             | 5770.589506 |             | 11794.6245  |
| 8962.764414  |              |             |             |             |             |             |
| IL36G        | IL36G        | 0           | 0           | 0           | 1.885508449 |             |
| ANKRA2       | ANKRA2       | 1065.947895 |             | 1057.230495 |             | 1935.711273 |
| 1682.816291  |              |             |             |             |             |             |

|             |           |             |             |             |             |
|-------------|-----------|-------------|-------------|-------------|-------------|
| ZNF141      | ZNF141    | 461.5202975 | 414.3612317 | 891.0700415 |             |
| 836.2229973 |           |             |             |             |             |
| EMP3        | EMP3      | 12014.75556 | 16203.75846 | 6882.132144 |             |
| 6877.392069 |           |             |             |             |             |
| ZNF136      | ZNF136    | 957.0103631 | 754.5843018 | 3240.173528 |             |
| 2340.85874  |           |             |             |             |             |
| FUBP1       | FUBP1     | 6383.973658 | 5572.549211 | 4825.885345 |             |
| 5682.922467 |           |             |             |             |             |
| ZBTB3       | ZBTB3     | 557.5727452 | 646.9316288 | 579.4633837 |             |
| 518.5148236 |           |             |             |             |             |
| MAGOHB      | MAGOHB    | 2779.664127 | 2496.323302 | 2308.032122 |             |
| 2534.123356 |           |             |             |             |             |
| ANO1        | ANO1      | 0           | 0           | 2.678567259 | 0           |
| TRMT12      | TRMT12    | 384.2097908 | 409.2832754 | 490.1778084 |             |
| 468.5488497 |           |             |             |             |             |
| MIR621      | MIR621    | 7.028227881 | 11.17150379 | 8.035701777 |             |
| 6.599279573 |           |             |             |             |             |
| MIR548C     | MIR548C   | 3.51411394  | 2.031182508 | 0           | 0.942754225 |
| MIR613      | MIR613    | 3.51411394  | 0           | 0           | 5.656525348 |
| MIR612      | MIR612    | 2.342742627 | 0           | 0           | 3.771016899 |
| MIR611      | MIR611    | 974.5809328 | 921.1412674 | 849.9986769 |             |
| 824.9099466 |           |             |             |             |             |
| BBS10       | BBS10     | 313.927512  | 215.3053459 | 466.9635588 |             |
| 472.3198666 |           |             |             |             |             |
| PALB2       | PALB2     | 1832.024734 | 1705.177716 | 1384.819273 |             |
| 1595.140148 |           |             |             |             |             |
| MAP1S       | MAP1S     | 2883.916174 | 3475.353271 | 2511.603233 |             |
| 2557.692212 |           |             |             |             |             |
| PCDHGB6     | PCDHGB6   | 0           | 14.21827756 | 24.10710533 | 12.25580492 |
| GPS2        | GPS2      | 6152.042138 | 7248.27478  | 7266.952974 |             |
| 6501.233134 |           |             |             |             |             |
| SNORA5A     | SNORA5A   | 16.39919839 | 13.2026863  | 36.60708587 |             |
| 38.65292321 |           |             |             |             |             |
| SNORA71E    | SNORA71E  |             | 10.54234182 | 14.21827756 |             |
| 37.49994163 |           | 23.56885562 |             |             |             |
| BAHCC1      | BAHCC1    | 0           | 3.046773762 | 0           | 0           |
| LINC00158   | LINC00158 |             | 9.370970508 | 5.07795627  |             |
| 58.03562395 |           | 41.48118589 |             |             |             |
| RAET1K      | RAET1K    | 7.028227881 | 11.17150379 | 47.32135491 |             |
| 25.45436407 |           |             |             |             |             |
| CLUHP3      | CLUHP3    | 502.5182935 | 254.9134048 | 997.3198761 |             |
| 1590.426377 |           |             |             |             |             |
| GRK5        | GRK5      | 865.6434006 | 1282.691754 | 775.8916494 |             |
| 527.9423658 |           |             |             |             |             |
| MIR1206     | MIR1206   | 1.171371313 | 1.015591254 | 0.892855753 | 0           |
| MIR1204     | MIR1204   | 121.8226166 | 226.4768497 | 216.0710922 |             |
| 93.33266825 |           |             |             |             |             |
| MIR1231     | MIR1231   | 0           | 0           | 1.885508449 |             |
| MIR1226     | MIR1226   | 35.1411394  | 46.71719769 | 30.3570956  |             |
| 43.36669434 |           |             |             |             |             |

|              |              |             |             |             |             |
|--------------|--------------|-------------|-------------|-------------|-------------|
| MIR1200      | MIR1200      | 2.342742627 | 2.031182508 | 0           | 0           |
| TSPAN18      | TSPAN18      | 217.8750643 | 296.5526462 | 212.4996692 |             |
| 159.325464   |              |             |             |             |             |
| NEURL2       | NEURL2       | 26.94154021 | 21.32741634 | 89.2855753  |             |
| 73.53482953  |              |             |             |             |             |
| SACM1L       | SACM1L       | 4218.1081   | 4761.091799 | 4141.957838 |             |
| 4769.393623  |              |             |             |             |             |
| AGPS         | AGPS         | 5301.626565 | 5465.912129 | 2683.924394 |             |
| 4067.98448   |              |             |             |             |             |
| TMEM33       | TMEM33       | 4181.795589 | 3992.28922  | 2674.10298  |             |
| 2684.964032  |              |             |             |             |             |
| PLCD3        | PLCD3        | 96.0524477  | 46.71719769 | 23.21424958 |             |
| 35.82466054  |              |             |             |             |             |
| CXorf21      | CXorf21      | 1400.960091 | 1980.402945 | 594.6419315 |             |
| 864.5056241  |              |             |             |             |             |
| NKTR         | NKTR         | 2167.03693  | 1620.883641 | 3141.959395 |             |
| 3134.657797  |              |             |             |             |             |
| FAR2P1       | FAR2P1       | 0           | 0           | 2.828262674 |             |
| LINC00471    | LINC00471    | 70.53560449 | 7.028227881 | 16.24946006 |             |
| 27.33987252  |              |             |             |             |             |
| XXYLT1       | XXYLT1       | 588.0283994 | 707.8671041 | 636.6061519 |             |
| 619.3895256  |              |             |             |             |             |
| FCRL2        | FCRL2        | 0           | 0           | 4.713771124 |             |
| MAF1         | MAF1         | 8464.329111 | 10879.01351 | 10503.55508 |             |
| 9687.742413  |              |             |             |             |             |
| TERC         | TERC         | 43.3407386  | 27.42096386 | 7.142846024 |             |
| 19.79783872  |              |             |             |             |             |
| LOC100132111 | LOC100132111 | 604.4633448 | 326.8125965 | 509.8268095 |             |
| 732.5200326  |              |             |             |             |             |
| FRMD7        | FRMD7        | 1.171371313 | 0           | 0           | 0.942754225 |
| NPB          | NPB          | 4.685485254 | 11.17150379 | 6.249990271 |             |
| 8.484788022  |              |             |             |             |             |
| SPNS3        | SPNS3        | 190.9335241 | 216.3209371 | 184.8211409 |             |
| 194.2073703  |              |             |             |             |             |
| SLFNL1       | SLFNL1       | 35.1411394  | 20.31182508 | 75.89273901 |             |
| 9.427542247  |              |             |             |             |             |
| FAM106CP     | FAM106CP     | 13.19855915 | 1.171371313 | 0           | 0           |
| FKBP1AP1     | FKBP1AP1     | 41.07136464 | 17.5705697  | 10.15591254 |             |
| 38.65292321  |              |             |             |             |             |
| FAM83E       | FAM83E       | 3.51411394  | 3.046773762 | 32.14280711 | 0           |
| MYLPF        | MYLPF        | 12.88508445 | 17.26505132 | 45.5356434  |             |
| 23.56885562  |              |             |             |             |             |
| LINC00475    | LINC00475    | 0           | 0           | 3.046773762 | 0.892855753 |
| 0            |              |             |             |             |             |
| LOC100507419 | LOC100507419 | 307.142379  | 666.5102774 | 638.8068988 |             |
| 467.6060955  |              |             |             |             |             |
| ERAL1        | ERAL1        | 5977.507813 | 9414.530925 | 5568.741332 |             |
| 5012.624213  |              |             |             |             |             |
| RBM33        | RBM33        | 2232.633723 | 1967.200259 | 2725.888614 |             |

|                 |             |                 |             |               |
|-----------------|-------------|-----------------|-------------|---------------|
| 2877.285894     |             |                 |             |               |
| STARD3NL        | STARD3NL    |                 | 2764.4363   | 2976.697966   |
| 2164.282345     | 2202.273869 |                 |             |               |
| GCNT7 GCNT7     | 49.19759517 |                 | 30.46773762 | 47.32135491   |
| 60.33627038     |             |                 |             |               |
| TNFRSF13C       | TNFRSF13C   |                 | 4.685485254 | 0 11.60712479 |
| 16.96957604     |             |                 |             |               |
| ARID3C ARID3C   | 3.51411394  |                 | 7.109138778 | 0 0.942754225 |
| DEAR DEAR       | 176.8770683 |                 | 218.3521196 | 208.0353905   |
| 196.0928787     |             |                 |             |               |
| SPRN SPRN       | 189.7621528 |                 | 197.0247033 | 205.3568232   |
| 161.2109724     |             |                 |             |               |
| C14orf183       | C14orf183   |                 | 7.028227881 | 7.109138778   |
| 19.64282657     | 9.427542247 |                 |             |               |
| TSSK6 TSSK6     | 84.33873457 |                 | 51.79515396 | 143.7497762   |
| 178.1805485     |             |                 |             |               |
| GPR61 GPR61     | 3.51411394  | 0 0             |             | 0.942754225   |
| HMCN1 HMCN1     | 2.342742627 |                 | 11.17150379 | 2.678567259   |
| 0.942754225     |             |                 |             |               |
| TMPRSS6 TMPRSS6 | 42.16936728 |                 | 72.10697904 | 140.1783532   |
| 113.130507      |             |                 |             |               |
| TMEM155 TMEM155 | 1.171371313 | 0 0             |             | 0             |
| CUTC CUTC       | 1931.591296 |                 | 2282.033548 | 2297.317853   |
| 2513.382763     |             |                 |             |               |
| C3orf33 C3orf33 | 101.9093043 |                 | 104.6058992 | 244.6424763   |
| 199.8638956     |             |                 |             |               |
| ZNF786 ZNF786   | 748.5062693 |                 | 700.7579653 | 1552.676155   |
| 1224.637738     |             |                 |             |               |
| MRPL48 MRPL48   | 1839.052962 |                 | 3344.342    | 2261.603622   |
| 1626.251038     |             |                 |             |               |
| BHLHE22 BHLHE22 | 2.342742627 |                 | 1.015591254 | 0 0.942754225 |
| SLC25A5 SLC25A5 | 26519.84654 |                 | 36665.89105 | 16322.29602   |
| 18936.16136     |             |                 |             |               |
| SLC25A4 SLC25A4 | 335.0121956 |                 | 656.0719501 | 1211.605257   |
| 724.9779988     |             |                 |             |               |
| GDPGP1 GDPGP1   | 63.25405093 |                 | 95.46557788 | 84.82129654   |
| 98.04643937     |             |                 |             |               |
| CCDC79 CCDC79   | 1.171371313 | 0 10.71426904 0 |             |               |
| MSMP MSMP       | 409.9799597 |                 | 317.8800625 | 324.9994941   |
| 312.9944026     |             |                 |             |               |
| FAM102A FAM102A | 8251.139532 |                 | 8347.144517 | 12158.01679   |
| 10775.68079     |             |                 |             |               |
| PPP2CB PPP2CB   | 378.3529342 |                 | 184.8376082 | 260.7138799   |
| 196.0928787     |             |                 |             |               |
| MILR1 MILR1     | 0 0         | 0 2.828262674   |             |               |
| MYLK2 MYLK2     | 2.342742627 |                 | 9.140321286 | 0 0           |
| RBM27 RBM27     | 4166.567762 |                 | 4385.323035 | 3811.60121    |
| 4285.760706     |             |                 |             |               |
| 11-Sep 11-Sep   | 4397.327911 |                 | 4183.220375 | 2280.353593   |
| 2865.972843     |             |                 |             |               |

|             |             |             |             |             |
|-------------|-------------|-------------|-------------|-------------|
| LDOC1L      | LDOC1L      | 844.558717  | 804.3482732 | 1655.354566 |
| 1200.126128 |             |             |             |             |
| FZD1        | FZD1        | 70.28227881 | 36.56128515 | 12.49998054 |
| 64.10728728 |             |             |             |             |
| SOAT2       | SOAT2       | 14.05645576 | 18.28064257 | 3.571423012 |
| 31.11088942 |             |             |             |             |
| ZNF282      | ZNF282      | 730.9356996 | 253.8978135 | 124.1069497 |
| 247.9443611 |             |             |             |             |
| RPL12       | RPL12       | 8132.831029 | 7994.734352 | 9864.270359 |
| 8488.559039 |             |             |             |             |
| BST2        | BST2        | 12513.75974 | 16732.8815  | 15087.47651 |
| 11595.87696 |             |             |             |             |
| FER1L6      | FER1L6      | 2.342742627 | 0           | 0           |
| SFR1        | SFR1        | 836.3591178 | 709.8982866 | 823.2130043 |
| 809.825879  |             |             |             |             |
| FRA10AC1    | FRA10AC1    |             | 619.6554248 | 544.3569122 |
| 678.5703723 | 811.7113875 |             |             |             |
| GEM         | GEM         | 89.02421982 | 52.81074521 | 133.928363  |
| 68.8210584  |             |             |             |             |
| ZBTB7C      | ZBTB7C      | 25.7701689  | 28.43655511 | 72.321316   |
| 32.05364364 |             |             |             |             |
| VWA5B2      | VWA5B2      | 9.370970508 | 0           | 30.3570956  |
| PIK3CA      | PIK3CA      | 2874.545203 | 2307.423329 | 7.542033798 |
| 3119.57373  |             |             |             | 3471.423168 |
| PPAT        | PPAT        | 3083.049297 | 2961.464097 | 2507.138955 |
| 2984.759875 |             |             |             |             |
| FAM171A2    | FAM171A2    |             | 0           | 7.109138778 |
| 8.484788022 |             |             |             | 29.46423985 |
| SPTY2D1     | SPTY2D1     | 4960.757513 | 3885.652138 | 2391.960562 |
| 2692.506066 |             |             |             |             |
| ZNF93       | ZNF93       | 524.7743484 | 404.2053191 | 724.9988715 |
| 741.0048206 |             |             |             |             |
| BHLHE41     | BHLHE41     | 0           | 0           | 28.5713841  |
| MAP2K2      | MAP2K2      | 5908.396905 | 6794.30549  | 0.942754225 |
| 4490.338372 |             |             |             | 3665.172866 |
| NRG4        | NRG4        | 3.51411394  | 4.062365016 | 1.785711506 |
| 1.885508449 |             |             |             |             |
| BCL10       | BCL10       | 1998.359461 | 2181.490014 | 1899.104187 |
| 2029.749846 |             |             |             |             |
| MSANTD1     | MSANTD1     | 9.370970508 | 1.015591254 | 0           |
| ZNF98       | ZNF98       | 0           | 1.015591254 | 0           |
| ZNF354C     | ZNF354C     | 182.7339249 | 83.27848283 | 2.678567259 |
| 278.1124963 |             |             |             | 1.885508449 |
| ZNF812      | ZNF812      | 0           | 0           | 7.142846024 |
| OTUD1       | OTUD1       | 2612.158029 | 2480.073842 | 9.427542247 |
| 1882.680187 |             |             |             | 1740.175863 |
| SMAD5       | SMAD5       | 406.4658458 | 605.2923874 | 741.9631308 |
| 636.3591017 |             |             |             |             |
| TIPRL       | TIPRL       | 4604.660633 | 4973.350371 | 3513.387388 |
| 4092.496089 |             |             |             |             |

|              |              |             |             |             |
|--------------|--------------|-------------|-------------|-------------|
| RPUSD2       | RPUSD2       | 1643.433953 | 2387.655038 | 2052.675376 |
| 2134.395565  |              |             |             |             |
| LOC100130357 | LOC100130357 |             | 37.48388203 | 13.2026863  |
| 43.7499319   | 85.79063445  |             |             |             |
| GRPEL2       | GRPEL2       | 2225.605496 | 1704.162124 | 1633.926028 |
| 1866.653365  |              |             |             |             |
| TMEM263      | TMEM263      | 2484.478556 | 2116.492173 | 3045.530974 |
| 3114.859958  |              |             |             |             |
| C7orf13      | C7orf13      | 153.4496421 | 215.3053459 | 130.3569399 |
| 183.8370738  |              |             |             |             |
| ZNF784       | ZNF784       | 122.9939879 | 64.99784026 | 101.7855558 |
| 56.56525348  |              |             |             |             |
| BLVRA        | BLVRA        | 2395.454336 | 3125.98988  | 1808.925756 |
| 2255.068106  |              |             |             |             |
| ELOF1        | ELOF1        | 3876.067676 | 5210.998725 | 3126.780847 |
| 3010.21424   |              |             |             |             |
| KBTBD11      | KBTBD11      | 757.8772398 | 451.9381081 | 304.4638118 |
| 506.2590187  |              |             |             |             |
| LCN6         | LCN6         | 0           | 2.031182508 | 0           |
| 4.713771124  |              |             |             |             |
| PAIP2B       | PAIP2B       | 93.70970508 | 125.9333155 | 344.6423207 |
| 251.715378   |              |             |             |             |
| TBC1D26      | TBC1D26      | 2.342742627 | 0           | 0           |
| 4.713771124  |              |             |             |             |
| CD3G         | CD3G         | 7226.189633 | 6851.1786   | 4866.063854 |
| 4780.706674  |              |             |             |             |
| MRPL12       | MRPL12       | 4013.11812  | 5295.292799 | 2614.281645 |
| 3176.138983  |              |             |             |             |
| POLA2        | POLA2        | 5294.598337 | 5661.921241 | 2922.31688  |
| 3485.362369  |              |             |             |             |
| EDARADD      | EDARADD      | 804.7320923 | 681.4617315 | 619.6418926 |
| 748.5468544  |              |             |             |             |
| BOC          | BOC          | 1.171371313 | 0           | 5.357134518 |
| 0.942754225  |              |             |             |             |
| ERN2         | ERN2         | 530.631205  | 545.3725034 | 125.8926612 |
| 197.035633   |              |             |             |             |
| EFCAB12      | EFCAB12      | 4.685485254 | 3.046773762 | 34.82137437 |
| 1.885508449  |              |             |             |             |
| ZFP14        | ZFP14        | 178.0484396 | 76.16934405 | 737.498852  |
| 471.3771124  |              |             |             |             |
| NHEJ1        | NHEJ1        | 1413.845175 | 1978.371763 | 1653.568855 |
| 1525.376336  |              |             |             |             |
| MAB21L3      | MAB21L3      | 0           | 0           | 5.357134518 |
| 0.942754225  |              |             |             |             |
| IGF2R        | IGF2R        | 7938.383391 | 2764.439394 | 3024.995291 |
| 3580.580545  |              |             |             |             |
| RGS2         | RGS2         | 650.111079  | 445.8445605 | 1390.176407 |
| 1455.612523  |              |             |             |             |
| RPN1         | RPN1         | 24314.15435 | 29329.25983 | 21411.57381 |
| 21166.71785  |              |             |             |             |
| STAR         | STAR         | 8.199599194 | 14.21827756 | 26.78567259 |
| 30.16813519  |              |             |             |             |
| ANKRD27      | ANKRD27      | 4085.743141 | 5112.486373 | 5560.70563  |
| 3871.891601  |              |             |             |             |

|                         |             |               |               |
|-------------------------|-------------|---------------|---------------|
| MYBPC3 MYBPC3           | 0 0         | 10.71426904   | 0             |
| LOC283070 LOC283070     |             | 14.05645576   | 9.140321286   |
| 116.0712479 73.53482953 |             |               |               |
| MIR301A MIR301A         | 2.342742627 | 0 0           | 0             |
| MIR219A2 MIR219A2       |             | 0 0           | 0 1.885508449 |
| ZNF394 ZNF394           | 2102.611508 | 2837.561964   | 3693.74425    |
| 2503.012467             |             |               |               |
| PTPLB PTPLB             | 1118.659604 | 659.1187239   | 751.7845441   |
| 927.6701571             |             |               |               |
| LRRC39 LRRC39           | 165.1633552 | 158.4322356   | 226.7853613   |
| 209.2914379             |             |               |               |
| C10orf88 C10orf88       |             | 1084.689836   | 1365.970237   |
| 647.3204209 901.2730388 |             |               |               |
| DDIAS DDIAS             | 2017.101402 | 2223.129255   | 1392.854975   |
| 1548.002437             |             |               |               |
| SNORA76C SNORA76C       |             | 7.028227881   | 3.046773762   |
| 3.571423012 10.37029647 |             |               |               |
| IQGAP1 IQGAP1           | 34172.41533 | 27606.81706   | 17497.29419   |
| 24423.9337              |             |               |               |
| APC2 APC2               | 63.25405093 | 31.48332888   | 54.46420093   |
| 60.33627038             |             |               |               |
| CRAMP1L CRAMP1L         | 1441.958087 | 576.8558323   | 820.534437    |
| 713.6649481             |             |               |               |
| ABCC4 ABCC4             | 686.4235897 | 603.2612049   | 680.3560838   |
| 962.5520634             |             |               |               |
| LYZL2 LYZL2             | 0 0         | 0.892855753   | 0             |
| C19orf47 C19orf47       |             | 1137.401545   | 1058.246087   |
| 567.8562589 645.7866439 |             |               |               |
| GPR22 GPR22             | 21.08468364 | 23.35859884   | 31.24995136   |
| 26.39711829             |             |               |               |
| RAB8A RAB8A             | 13236.49584 | 16803.97289   | 11008.91143   |
| 12065.36857             |             |               |               |
| SEC11C SEC11C           | 8267.53873  | 11758.51554   | 6027.669189   |
| 5874.301574             |             |               |               |
| NT5M NT5M               | 85.51010588 | 121.8709505   | 108.9284019   |
| 97.10368515             |             |               |               |
| MRPS22 MRPS22           | 1883.565072 | 2189.614744   | 2306.24641    |
| 2486.042891             |             |               |               |
| PRTFDC1 PRTFDC1         | 77.31050669 | 50.7795627    | 36.60708587   |
| 65.05004151             |             |               |               |
| SKIV2L2 SKIV2L2         | 6278.55024  | 6422.599091   | 5335.70598    |
| 6472.950507             |             |               |               |
| RNLS RNLS               | 117.1371313 | 187.884382    | 280.3567065   |
| 218.7189801             |             |               |               |
| GPBAR1 GPBAR1           | 9.370970508 | 4.062365016   | 3.571423012   |
| 16.02682182             |             |               |               |
| ELTD1 ELTD1             | 0 0         | 0 0.942754225 |               |
| RRAGC RRAGC             | 591.5425133 | 238.6639447   | 416.9636367   |
| 300.7385977             |             |               |               |
| DUS1L DUS1L             | 6639.332605 | 9261.176646   | 7618.738141   |



|             |          |             |             |             |             |
|-------------|----------|-------------|-------------|-------------|-------------|
| 7180.95893  |          |             |             |             |             |
| NAB2        | NAB2     | 1299.050787 | 928.2504062 | 1264.283746 |             |
| 1485.780658 |          |             |             |             |             |
| SNORD15B    | SNORD15B |             | 7.028227881 | 8.124730032 |             |
| 8.035701777 |          | 16.96957604 |             |             |             |
| SNORD62A    | SNORD62A |             | 10.54234182 | 4.062365016 |             |
| 6.249990271 |          | 5.656525348 |             |             |             |
| SNORD63     | SNORD63  | 23.42742627 | 7.109138778 | 57.14276819 |             |
| 52.79423658 |          |             |             |             |             |
| PIP5K1P1    | PIP5K1P1 |             | 4.685485254 | 0           | 1.785711506 |
| 0           |          |             |             |             |             |
| OR7E5P      | OR7E5P   | 0           | 0           | 0.892855753 | 0           |
| CTSK        | CTSK     | 108.9375322 | 37.5768764  | 21.42853807 |             |
| 87.6761429  |          |             |             |             |             |
| SNORA74A    | SNORA74A |             | 2.342742627 | 1.015591254 | 0           |
| 0.942754225 |          |             |             |             |             |
| SNORA53     | SNORA53  | 15.22782708 | 2.031182508 | 0.892855753 |             |
| 13.19855915 |          |             |             |             |             |
| SEC22A      | SEC22A   | 1422.044775 | 1646.273423 | 1318.747947 |             |
| 1382.077693 |          |             |             |             |             |
| ZSWIM6      | ZSWIM6   | 223.7319209 | 125.9333155 | 193.7496984 |             |
| 199.8638956 |          |             |             |             |             |
| IL17B       | IL17B    | 3.51411394  | 2.031182508 | 8.035701777 | 0           |
| FAM214A     | FAM214A  | 965.2099623 | 721.0697904 | 744.641698  |             |
| 986.1209191 |          |             |             |             |             |
| CTRB1       | CTRB1    | 0           | 1.015591254 | 0           | 0           |
| MTR         | MTR      | 2226.776867 | 1623.930415 | 3515.1731   |             |
| 3099.775891 |          |             |             |             |             |
| HS3ST1      | HS3ST1   | 57.39719436 | 70.07579653 | 16.96425931 |             |
| 54.67974503 |          |             |             |             |             |
| KIF5A       | KIF5A    | 51.54033779 | 20.31182508 | 46.42849916 |             |
| 70.70656685 |          |             |             |             |             |
| BRD3        | BRD3     | 1643.433953 | 1430.968077 | 2979.459648 |             |
| 2436.076917 |          |             |             |             |             |
| LGALS7      | LGALS7   | 0           | 1.015591254 | 0           | 0           |
| RPSAP58     | RPSAP58  | 121.8226166 | 437.7198305 | 526.7848943 |             |
| 146.1269048 |          |             |             |             |             |
| MANEA       | MANEA    | 2053.413912 | 1114.103606 | 1186.605296 |             |
| 1621.537267 |          |             |             |             |             |
| TMEM173     | TMEM173  | 10912.49516 | 13122.45459 | 4888.385248 |             |
| 6633.218725 |          |             |             |             |             |
| SYMPK       | SYMPK    | 2420.053134 | 2224.144846 | 1914.282735 |             |
| 983.2926564 |          |             |             |             |             |
| SRGAP2D     | SRGAP2D  | 797.7038645 | 715.9918341 | 458.9278571 |             |
| 607.1337207 |          |             |             |             |             |
| SMCR8       | SMCR8    | 1472.413741 | 798.2547257 | 1353.569322 |             |
| 1026.659351 |          |             |             |             |             |
| APOA1BP     | APOA1BP  | 3045.565415 | 4694.062776 | 3274.994902 |             |
| 3233.646991 |          |             |             |             |             |
| RASL11B     | RASL11B  | 8.199599194 | 24.3741901  | 50.89277792 |             |

|             |             |             |             |             |             |   |
|-------------|-------------|-------------|-------------|-------------|-------------|---|
| 6.599279573 |             |             |             |             |             |   |
| KIAA1143    | KIAA1143    |             | 1602.435957 |             | 1415.734208 |   |
| 2620.531635 | 2018.436795 |             |             |             |             |   |
| ANKRD34B    | ANKRD34B    |             | 1.171371313 |             | 2.031182508 | 0 |
| 0           |             |             |             |             |             |   |
| OLFML2A     | OLFML2A     | 1.171371313 | 0           | 0           | 0           |   |
| A1BG        | A1BG        | 122.9939879 | 171.6349219 |             | 500.8920775 |   |
| 214.9479632 |             |             |             |             |             |   |
| FBX036      | FBX036      | 85.51010588 | 120.8553592 |             | 90.17843106 |   |
| 193.2646161 |             |             |             |             |             |   |
| MMAA        | MMAA        | 573.9719436 | 618.4950737 |             | 971.4270593 |   |
| 819.2534213 |             |             |             |             |             |   |
| CYCS        | CYCS        | 14792.07695 | 17116.775   |             | 11973.19565 |   |
| 13769.86821 |             |             |             |             |             |   |
| MFSD4       | MFSD4       | 98.39519033 | 102.5747167 |             | 305.3566675 |   |
| 195.1501245 |             |             |             |             |             |   |
| TAPT1       | TAPT1       | 1744.171886 | 1648.304605 |             | 2525.888925 |   |
| 2208.873149 |             |             |             |             |             |   |
| LIN28B      | LIN28B      | 0           | 1.015591254 | 0           | 0           |   |
| ASCL5       | ASCL5       | 0           | 0           | 1.785711506 | 0           |   |
| TMEM18      | TMEM18      | 1439.615344 | 1794.549746 |             | 1783.925795 |   |
| 1432.043667 |             |             |             |             |             |   |
| IKBIP       | IKBIP       | 1432.587116 | 1772.206738 |             | 1224.105237 |   |
| 1187.870323 |             |             |             |             |             |   |
| SP140L      | SP140L      | 2602.787059 | 2539.993726 |             | 2977.673936 |   |
| 2468.13056  |             |             |             |             |             |   |
| PANK1       | PANK1       | 180.3911823 | 262.0225435 |             | 96.42842133 |   |
| 98.9891936  |             |             |             |             |             |   |
| SCARNA13    | SCARNA13    |             | 45.68348122 |             | 32.49892013 |   |
| 152.6783338 | 106.5312274 |             |             |             |             |   |
| SCARNA21    | SCARNA21    |             | 8.199599194 |             | 2.031182508 |   |
| 61.60704696 | 28.28262674 |             |             |             |             |   |
| MALAT1      | MALAT1      | 48184.35898 | 29641.04634 |             | 221596.0836 |   |
| 207351.2497 |             |             |             |             |             |   |
| RNF126P1    | RNF126P1    |             | 0           | 1.015591254 | 0           | 0 |
| CLK2P       | CLK2P       | 2.342742627 | 1.015591254 | 0           | 0           |   |
| DIXDC1      | DIXDC1      | 346.7259088 | 336.1607051 |             | 353.5708782 |   |
| 270.5704625 |             |             |             |             |             |   |
| SNORD116-14 | SNORD116-14 |             | 0           | 0           | 1.785711506 |   |
| 0.942754225 |             |             |             |             |             |   |
| SNORD116-13 | SNORD116-13 |             | 0           | 0           | 1.785711506 | 0 |
| RSPH1       | RSPH1       | 0           | 0           | 4.464278765 | 9.427542247 |   |
| NKG7        | NKG7        | 988.6373886 | 2250.550219 |             | 1616.068913 |   |
| 761.7454136 |             |             |             |             |             |   |
| PIK3R6      | PIK3R6      | 113.6230174 | 32.49892013 |             | 16.96425931 |   |
| 65.99279573 |             |             |             |             |             |   |
| DSCAML1     | DSCAML1     | 0           | 19.29623383 | 0.892855753 | 3.771016899 |   |
| DEAF1       | DEAF1       | 2140.09539  | 2522.728675 |             | 1831.247149 |   |
| 2778.2967   |             |             |             |             |             |   |
| NDUFV2      | NDUFV2      | 19717.69332 | 22185.59094 |             | 12137.48111 |   |

|              |              |             |             |             |             |   |
|--------------|--------------|-------------|-------------|-------------|-------------|---|
| 15549.78818  |              |             |             |             |             |   |
| PRR15        | PRR15        | 1.171371313 | 10.15591254 | 0           | 0           |   |
| SBF2         | SBF2         | 100.737933  | 184.8376082 | 591.9633643 |             |   |
| 510.9727898  |              |             |             |             |             |   |
| C19orf67     | C19orf67     |             | 2.342742627 | 9.140321286 |             |   |
| 25.89281684  |              | 29.22538097 |             |             |             |   |
| LOC100335030 | LOC100335030 |             | 23.42742627 | 6.093547524 |             |   |
| 0.892855753  |              | 9.427542247 |             |             |             |   |
| NOTCH2NL     | NOTCH2NL     |             | 2764.4363   | 3339.264043 |             |   |
| 3049.102397  |              | 2139.109336 |             |             |             |   |
| MIR1238      | MIR1238      | 4.685485254 | 7.109138778 | 13.3928363  |             |   |
| 2.828262674  |              |             |             |             |             |   |
| CACNG8       | CACNG8       | 0           | 0           | 0.942754225 |             |   |
| ZZZ3         | ZZZ3         | 2790.206469 | 2802.01627  | 4320.528989 |             |   |
| 4091.553335  |              |             |             |             |             |   |
| KLHL15       | KLHL15       | 631.369138  | 321.9424275 | 559.8205572 |             |   |
| 705.1801601  |              |             |             |             |             |   |
| TMEM106A     | TMEM106A     |             | 297.5283136 | 259.991361  |             |   |
| 577.6776722  |              | 457.235799  |             |             |             |   |
| KLHL42       | KLHL42       | 1349.419753 | 1448.233128 | 1131.248239 |             |   |
| 1105.850706  |              |             |             |             |             |   |
| KMT2C        | KMT2C        | 3193.1582   | 2281.017957 | 4411.600276 |             |   |
| 4314.986087  |              |             |             |             |             |   |
| ADM2         | ADM2         | 49.19759517 | 15.23386881 | 204.4639674 |             |   |
| 164.9819893  |              |             |             |             |             |   |
| DDX26B       | DDX26B       | 1369.333065 | 1074.495547 | 1289.283707 |             |   |
| 1436.757438  |              |             |             |             |             |   |
| LOC100288911 | LOC100288911 |             | 1.171371313 | 0           | 0           | 0 |
| HEXA-AS1     | HEXA-AS1     |             | 38.65525334 | 57.88870148 |             |   |
| 90.17843106  |              | 37.71016899 |             |             |             |   |
| NDUFV3       | NDUFV3       | 1068.290638 | 1229.881009 | 1234.819506 |             |   |
| 1093.594901  |              |             |             |             |             |   |
| MIR320B2     | MIR320B2     |             | 0           | 0           | 1.785711506 | 0 |
| CLDND2       | CLDND2       | 46.85485254 | 32.49892013 | 20.53568232 |             |   |
| 33.93915209  |              |             |             |             |             |   |
| CMTM7        | CMTM7        | 6204.753847 | 6828.835592 | 3555.351609 |             |   |
| 3955.796727  |              |             |             |             |             |   |
| FAM71E1      | FAM71E1      | 56.22582305 | 39.60805891 | 86.60700804 |             |   |
| 65.99279573  |              |             |             |             |             |   |
| FLJ30679     | FLJ30679     |             | 10.54234182 | 16.24946006 |             | 0 |
| 0            |              |             |             |             |             |   |
| SHC4         | SHC4         | 374.8388203 | 221.3988934 | 101.7855558 |             |   |
| 383.7009695  |              |             |             |             |             |   |
| HADHA        | HADHA        | 18745.45513 | 29143.40663 | 12613.37322 |             |   |
| 14463.73532  |              |             |             |             |             |   |
| OSR2         | OSR2         | 1.171371313 | 3.046773762 | 0           | 0           |   |
| PIK3AP1      | PIK3AP1      | 229.5887774 | 115.777403  | 309.8209463 |             |   |
| 292.2538097  |              |             |             |             |             |   |
| ITFG3        | ITFG3        | 511.889264  | 1049.105765 | 2333.032083 |             |   |
| 1535.746632  |              |             |             |             |             |   |

|                 |              |             |             |             |   |
|-----------------|--------------|-------------|-------------|-------------|---|
| LOC100190986    | LOC100190986 | 4.685485254 | 2.031182508 |             |   |
| 2.678567259     | 11.3130507   |             |             |             |   |
| SETD7 SETD7     | 797.7038645  | 585.9961536 | 610.7133351 |             |   |
| 759.8599051     |              |             |             |             |   |
| PCL0 PCL0       | 7.028227881  | 0           | 0.892855753 | 3.771016899 |   |
| AKAP3 AKAP3     | 132.3649584  | 206.1650246 | 270.5352932 |             |   |
| 324.3074533     |              |             |             |             |   |
| LINC01031       | LINC01031    | 1.171371313 | 0           | 0           |   |
| 1.885508449     |              |             |             |             |   |
| LOC100506127    | LOC100506127 | 24.59879758 | 22.34300759 |             |   |
| 93.74985407     | 43.36669434  |             |             |             |   |
| OLFML1 OLFML1   | 4.685485254  | 1.015591254 | 26.78567259 |             |   |
| 48.08046546     |              |             |             |             |   |
| ANKMY2 ANKMY2   | 1452.500429  | 1690.959438 | 1753.568699 |             |   |
| 1481.066887     |              |             |             |             |   |
| PVRIG2P PVRIG2P | 836.3591178  | 423.5015529 | 1197.319565 |             |   |
| 1339.653753     |              |             |             |             |   |
| C1orf105        | C1orf105     | 1.171371313 | 4.062365016 |             |   |
| 27.67852834     | 0            |             |             |             |   |
| EFCAB7 EFCAB7   | 527.1170911  | 491.546167  | 298.2138215 |             |   |
| 495.8887222     |              |             |             |             |   |
| RBM43 RBM43     | 141.7359289  | 57.88870148 | 84.82129654 |             |   |
| 188.5508449     |              |             |             |             |   |
| FAM89A FAM89A   | 674.7098766  | 593.1052924 | 1144.641075 |             |   |
| 1173.72901      |              |             |             |             |   |
| NFATC2IP        | NFATC2IP     | 5013.469222 | 3316.921036 |             |   |
| 3632.137203     | 3277.956439  |             |             |             |   |
| ZDHHC12 ZDHHC12 | 4732.340106  | 6962.893638 | 2975.888225 |             |   |
| 3138.428814     |              |             |             |             |   |
| USP37 USP37     | 2883.916174  | 2175.396466 | 2514.281801 |             |   |
| 2783.953226     |              |             |             |             |   |
| SNORA64 SNORA64 | 70.28227881  | 103.5903079 | 174.9997276 |             |   |
| 140.4703795     |              |             |             |             |   |
| RPS26P11        | RPS26P11     | 0           | 0           | 0.892855753 |   |
| 0.942754225     |              |             |             |             |   |
| CCNB1 CCNB1     | 15765.48651  | 19967.53965 | 4507.135841 |             |   |
| 8369.772007     |              |             |             |             |   |
| LOC101929517    | LOC101929517 | 0           | 4.062365016 | 0           | 0 |
| LINC01395       | LINC01395    | 0           | 0           | 70.53560449 |   |
| 21.68334717     |              |             |             |             |   |
| BRIP1 BRIP1     | 1938.619524  | 1478.700866 | 659.8204015 |             |   |
| 738.176558      |              |             |             |             |   |
| FSIP1 FSIP1     | 56.22582305  | 25.38978135 | 17.85711506 |             |   |
| 54.67974503     |              |             |             |             |   |
| NEK8 NEK8       | 435.7501286  | 449.9069255 | 636.6061519 |             |   |
| 556.2249926     |              |             |             |             |   |
| NEUROG2 NEUROG2 | 0            | 0           | 7.142846024 | 0           |   |
| HOXB9 HOXB9     | 5.856856567  | 1.015591254 | 0           | 12.25580492 |   |
| MIR4749 MIR4749 | 2.342742627  | 7.109138778 | 14.28569205 |             |   |
| 3.771016899     |              |             |             |             |   |

|              |              |             |             |             |             |
|--------------|--------------|-------------|-------------|-------------|-------------|
| MIR4748      | MIR4748      | 4.685485254 | 0           | 4.464278765 | 1.885508449 |
| MIR4747      | MIR4747      | 4.685485254 | 0           | 0           | 0.942754225 |
| MIR4751      | MIR4751      | 26.94154021 | 23.35859884 | 7.142846024 |             |
| 26.39711829  |              |             |             |             |             |
| MIR4742      | MIR4742      | 7.028227881 | 1.015591254 | 5.357134518 |             |
| 14.14131337  |              |             |             |             |             |
| LOC100507217 | LOC100507217 |             | 2585.216489 | 2333.828702 |             |
| 3408.923265  | 3003.61496   |             |             |             |             |
| NAMA         | NAMA         | 0           | 1.015591254 | 0           | 0           |
| HHIP-AS1     | HHIP-AS1     |             | 2.342742627 | 1.015591254 | 0           |
| 0            |              |             |             |             |             |
| RAD18        | RAD18        | 2391.940222 | 2350.078162 | 1487.497685 |             |
| 1964.699804  |              |             |             |             |             |
| IL1RAPL1     | IL1RAPL1     |             | 0           | 0           | 1.885508449 |
| RBKS         | RBKS         | 166.3347265 | 349.3633914 | 254.4638896 |             |
| 194.2073703  |              |             |             |             |             |
| MIR761       | MIR761       | 55.05445173 | 45.70160643 | 45.5356434  |             |
| 46.19495701  |              |             |             |             |             |
| CCDC8        | CCDC8        | 0           | 1.015591254 | 0           | 0           |
| LOC284648    | LOC284648    |             | 0           | 0           | 25.89281684 |
| 11.3130507   |              |             |             |             |             |
| LOC647859    | LOC647859    |             | 0           | 2.031182508 | 0           |
| NBAS         | NBAS         | 2947.170225 | 1776.269103 | 1698.211642 | 0           |
| 2207.930394  |              |             |             |             |             |
| LINC00336    | LINC00336    |             | 0           | 0           | 2.678567259 |
| 4.713771124  |              |             |             |             |             |
| STK33        | STK33        | 118.3085027 | 80.23170907 | 17.85711506 |             |
| 61.27902461  |              |             |             |             |             |
| TPRKB        | TPRKB        | 2217.405896 | 1763.066417 | 1391.069263 |             |
| 1789.347519  |              |             |             |             |             |
| BOK-AS1      | BOK-AS1      | 0           | 1.015591254 | 0           | 0           |
| PMS2L2       | PMS2L2       | 87.85284851 | 95.46557788 | 64.28561422 |             |
| 96.16093092  |              |             |             |             |             |
| DOC2GP       | DOC2GP       | 8.199599194 | 24.3741901  | 12.49998054 |             |
| 47.13771124  |              |             |             |             |             |
| LIMD1-AS1    | LIMD1-AS1    |             | 606.7703404 | 294.5214637 |             |
| 493.7492314  | 346.9335547  |             |             |             |             |
| SLC9C2       | SLC9C2       | 0           | 0           | 6.599279573 |             |
| MIR630       | MIR630       | 1.171371313 | 0           | 0           | 0.942754225 |
| MIR628       | MIR628       | 1.171371313 | 0           | 0           | 0           |
| MIR627       | MIR627       | 0           | 0           | 0.892855753 | 0           |
| IER5L        | IER5L        | 28.11291152 | 28.43655511 | 36.60708587 |             |
| 77.30584643  |              |             |             |             |             |
| TEX261       | TEX261       | 4816.678841 | 4131.425221 | 3912.49391  |             |
| 3733.30673   |              |             |             |             |             |
| ZBTB42       | ZBTB42       | 169.8488405 | 83.27848283 | 183.9282851 |             |
| 228.1465224  |              |             |             |             |             |
| TOMM40L      | TOMM40L      | 1364.64758  | 1363.939054 | 761.6059573 |             |
| 800.3983368  |              |             |             |             |             |
| DOCK9-AS2    | DOCK9-AS2    |             | 21.08468364 | 38.59246765 |             |

|                 |                |               |             |  |
|-----------------|----------------|---------------|-------------|--|
| 116.9641036     | 138.584871     |               |             |  |
| NOTCH2 NOTCH2   | 9784.464581    | 2886.310344   | 4099.100762 |  |
| 5475.516537     |                |               |             |  |
| NUDT21 NUDT21   | 12225.6024     | 11753.43758   | 8849.986224 |  |
| 10161.94779     |                |               |             |  |
| BLOC1S1-RDH5    | BLOC1S1-RDH5   | 2615.672143   | 2936.074315 |  |
| 1998.211175     | 2071.231032    |               |             |  |
| PFAS PFAS       | 6011.477581    | 5985.894851   | 4326.778979 |  |
| 4210.340368     |                |               |             |  |
| HESX1 HESX1     | 8.199599194    | 10.15591254   | 11.60712479 |  |
| 7.542033798     |                |               |             |  |
| PRG2 PRG2       | 57.39719436    | 79.21611782   | 56.24991244 |  |
| 50.90872813     |                |               |             |  |
| ARMCX5-GPRASP2  | ARMCX5-GPRASP2 | 240.1311193   | 244.7574922 |  |
| 382.1422623     | 473.2626208    |               |             |  |
| ZNF865 ZNF865   | 28.11291152    | 1.015591254   | 26.78567259 |  |
| 10.37029647     |                |               |             |  |
| RPL23 RPL23     | 7468.663495    | 6417.521134   | 7049.989026 |  |
| 6567.225929     |                |               |             |  |
| ELOVL4 ELOVL4   | 284.6432292    | 109.6838554   | 395.5350986 |  |
| 506.2590187     |                |               |             |  |
| CACNG4 CACNG4   | 1.171371313    | 1.015591254   | 0 0         |  |
| NUP50 NUP50     | 10620.8237     | 10408.79476   | 9016.057394 |  |
| 9611.379321     |                |               |             |  |
| DNAJA2 DNAJA2   | 9422.510845    | 11600.0833    | 9443.7353   |  |
| 9479.39373      |                |               |             |  |
| DIEXF DIEXF     | 1436.10123     | 1917.436288   | 3083.030915 |  |
| 2569.948017     |                |               |             |  |
| GRB2 GRB2       | 15703.40383    | 17412.31205   | 14396.40616 |  |
| 14608.91947     |                |               |             |  |
| BCL9L BCL9L     | 315.0988833    | 111.7150379   | 350.8923109 |  |
| 392.1857575     |                |               |             |  |
| TMED4 TMED4     | 2984.654107    | 4014.632227   | 4491.957293 |  |
| 3651.287112     |                |               |             |  |
| ZNF678 ZNF678   | 261.2158029    | 143.1983668   | 237.4996303 |  |
| 324.3074533     |                |               |             |  |
| FAR2 FAR2       | 933.5829368    | 1175.039081   | 605.3562006 |  |
| 725.920753      |                |               |             |  |
| TSPAN2 TSPAN2   | 385.3811621    | 214.2897546   | 227.678217  |  |
| 170.6385147     |                |               |             |  |
| PPIF PPIF       | 7725.193812    | 8595.964374   | 4015.172321 |  |
| 4295.188248     |                |               |             |  |
| MEIS1 MEIS1     | 4.685485254    | 1.015591254   | 0 0         |  |
| ETF1 ETF1       | 8657.605378    | 8667.055762   | 5469.634343 |  |
| 6473.893261     |                |               |             |  |
| LOC101930452    | LOC101930452   | 22.25605496   | 14.21827756 |  |
| 0.892855753     | 2.828262674    |               |             |  |
| SLITRK5 SLITRK5 | 0 0            | 0 1.885508449 |             |  |
| CATSPERG        | CATSPERG       | 21.08468364   | 38.59246765 |  |
| 110.7141134     | 92.38991402    |               |             |  |

|                |                |               |               |               |
|----------------|----------------|---------------|---------------|---------------|
| SERINC1        | SERINC1        | 6897.034294   | 7713.415575   | 17530.32986   |
| 12936.47347    |                |               |               |               |
| OR52B6         | OR52B6         | 0 0           | 0 2.828262674 |               |
| KRT40          | KRT40          | 0 0           | 0 1.885508449 |               |
| CCDC38         | CCDC38         | 5.856856567   | 5.07795627    | 0 0.942754225 |
| LOC100131626   | LOC100131626   | 395.9235039   | 409.2832754   |               |
| 341.0708977    | 405.3843166    |               |               |               |
| AKAP5          | AKAP5          | 482.6049811   | 122.8865417   | 79.46416202   |
| 164.0392351    |                |               |               |               |
| NXPH2          | NXPH2          | 0 0           | 8.035701777   | 0             |
| NXPH4          | NXPH4          | 3.51411394    | 1.015591254   | 3.571423012   |
| 6.599279573    |                |               |               |               |
| CYSLTR1        | CYSLTR1        | 2396.625707   | 2337.891067   | 1736.60444    |
| 2179.647768    |                |               |               |               |
| KDELR3         | KDELR3         | 90.19559114   | 101.5591254   | 91.07128681   |
| 71.64932108    |                |               |               |               |
| NDUFS6         | NDUFS6         | 5052.124475   | 5411.070202   | 2950.888264   |
| 3075.264281    |                |               |               |               |
| ZNF32-AS1      | ZNF32-AS1      |               | 138.221815    | 180.7752432   |
| 416.9636367    | 399.7277913    |               |               |               |
| AIRN           | AIRN           | 2.342742627   | 3.046773762   | 0.892855753   |
| 0.942754225    |                |               |               |               |
| METTL21EP      | METTL21EP      |               | 3.51411394    | 4.062365016   |
| 2.678567259    | 0              |               |               |               |
| FLJ38576       | FLJ38576       |               | 17.5705697    | 7.109138778   |
| 28.5713841     | 1.885508449    |               |               |               |
| OR1J1          | OR1J1          | 0 0           | 0.892855753   | 0             |
| C15orf38-AP3S2 | C15orf38-AP3S2 | 2479.793071   | 3115.833967   |               |
| 2167.853768    | 2010.894761    |               |               |               |
| FLJ41200       | FLJ41200       | 0 0           | 0 0.942754225 |               |
| DNAJC27-AS1    | DNAJC27-AS1    | 18.74194102   | 33.51451138   |               |
| 66.07132572    | 46.19495701    |               |               |               |
| MAPK8IP1       | MAPK8IP1       | 1.171371313   | 2.031182508   |               |
| 9.821413283    | 16.96957604    |               |               |               |
| TEX12          | TEX12          | 9.370970508   | 11.17150379   | 34.82137437   |
| 1.885508449    |                |               |               |               |
| VPS35          | VPS35          | 8340.163752   | 10752.06461   | 11034.80425   |
| 9787.674361    |                |               |               |               |
| SLC7A11        | SLC7A11        | 363.1251072   | 345.3010264   | 187.4997081   |
| 168.7530062    |                |               |               |               |
| DNAJB9         | DNAJB9         | 1549.724248   | 1679.787934   | 4466.957332   |
| 3273.242668    |                |               |               |               |
| DRG1           | DRG1           | 6489.397077   | 8423.313861   | 5786.598135   |
| 5854.503735    |                |               |               |               |
| LOC100507534   | LOC100507534   | 0 1.015591254 | 0 0           |               |
| AN05           | AN05           | 0 0           | 3.571423012   | 0             |
| P2RX6          | P2RX6          | 7.028227881   | 0 6.249990271 | 0             |
| SMARCB1        | SMARCB1        | 3551.597822   | 3689.643026   | 1926.782715   |
| 1700.728621    |                |               |               |               |
| FAM127C        | FAM127C        | 0 2.031182508 | 33.92851862   | 42.42394011   |

|             |             |             |             |             |
|-------------|-------------|-------------|-------------|-------------|
| FAHD2CP     | FAHD2CP     | 202.6472372 | 339.2074789 | 318.7495038 |
| 286.5972843 |             |             |             |             |
| SNORD116-7  | SNORD116-7  | 0           | 1.015591254 | 0.892855753 |
| 0           |             |             |             |             |
| NECAP1      | NECAP1      | 1965.561064 | 2268.830862 | 3861.601132 |
| 3221.391186 |             |             |             |             |
| E2F4        | E2F4        | 7773.220036 | 9440.936298 | 5515.169986 |
| 6484.263558 |             |             |             |             |
| OXCT1       | OXCT1       | 11343.5598  | 13421.03842 | 6199.097493 |
| 7838.058624 |             |             |             |             |
| GAL3ST4     | GAL3ST4     | 19.91331233 | 47.73278894 | 328.5709171 |
| 137.6421168 |             |             |             |             |
| AGPAT5      | AGPAT5      | 3512.942569 | 3375.825328 | 3081.245204 |
| 3084.691823 |             |             |             |             |
| FBX040      | FBX040      | 14.05645576 | 7.109138778 | 3.571423012 |
| 27.33987252 |             |             |             |             |
| CRYAA       | CRYAA       | 0           | 7.142846024 | 0           |
| ANKRD13A    | ANKRD13A    | 0           | 6617.07655  | 6126.046444 |
| 6018.740631 | 7217.726344 |             |             |             |
| ZNF614      | ZNF614      | 1162.000343 | 1031.840714 | 1287.497996 |
| 1196.355111 |             |             |             |             |
| DOCK5       | DOCK5       | 24.59879758 | 26.40537261 | 0           |
| TMEM191A    | TMEM191A    | 84.84788022 | 65.59679355 | 6.599279573 |
| 114.2855364 |             |             |             | 62.96665775 |
| IQCK        | IQCK        | 186.2480388 | 198.0402945 | 328.5709171 |
| 257.3719033 |             |             |             |             |
| FAM153B     | FAM153B     | 3.51411394  | 0           | 33.92851862 |
| MYH16       | MYH16       | 0           | 5.07795627  | 53.73699081 |
| BRCA2       | BRCA2       | 1944.47638  | 1268.473476 | 10.37029647 |
| 1379.249431 |             |             |             | 1037.498385 |
| OVCH1-AS1   | OVCH1-AS1   | 19.64282657 | 64.42542224 | 8.124730032 |
| 100.874702  |             |             |             |             |
| IER3IP1     | IER3IP1     | 3572.682506 | 3586.052718 | 3616.958656 |
| 3815.326347 |             |             |             |             |
| MOB2        | MOB2        | 1657.490409 | 1489.87237  | 1395.533542 |
| 1130.362315 |             |             |             |             |
| SLX4        | SLX4        | 413.4940737 | 289.4435074 | 275.8924277 |
| 242.2878358 |             |             |             |             |
| FBXL16      | FBXL16      | 169.8488405 | 88.3564391  | 341.9637534 |
| 321.4791906 |             |             |             |             |
| RNU6ATAC    | RNU6ATAC    | 6.249990271 | 1.171371313 | 2.031182508 |
| 5.656525348 |             |             |             |             |
| EMCN        | EMCN        | 0           | 1.785711506 | 0.942754225 |
| APOF        | APOF        | 8.199599194 | 2.031182508 | 6.249990271 |
| 12.25580492 |             |             |             |             |
| MIR1184-3   | MIR1184-3   | 505.3563562 | 391.2380187 | 470.2187506 |
| 631.6453306 |             |             |             |             |
| LIPT2       | LIPT2       | 122.9939879 | 147.2607318 | 318.7495038 |
| 261.1429202 |             |             |             |             |
| SGK494      | SGK494      | 101.9093043 | 23.35859884 | 105.3569789 |



|                 |               |             |             |             |             |
|-----------------|---------------|-------------|-------------|-------------|-------------|
| 40.53843166     |               |             |             |             |             |
| RPS4X RPS4X     | 9470.537069   | 18993.58763 | 16291.93893 |             |             |
| 10083.69919     |               |             |             |             |             |
| UBQLN2 UBQLN2   | 5881.455365   | 6234.714709 | 12386.58786 |             |             |
| 11163.15277     |               |             |             |             |             |
| LOC158435       | LOC158435     | 0           | 0           | 0           | 2.828262674 |
| CDH8 CDH8       | 0 0           | 0           | 1.885508449 |             |             |
| NPAS2 NPAS2     | 64.42542224   | 84.29407409 | 229.4639285 |             |             |
| 276.2269878     |               |             |             |             |             |
| UBE2T UBE2T     | 5224.316058   | 5516.691692 | 2574.995992 |             |             |
| 3104.489662     |               |             |             |             |             |
| PHKA2 PHKA2     | 1019.093043   | 581.9337886 | 710.7131794 |             |             |
| 819.2534213     |               |             |             |             |             |
| UBE2V2 UBE2V2   | 6722.499968   | 7022.813522 | 4806.242519 |             |             |
| 5613.158654     |               |             |             |             |             |
| SIX5 SIX5       | 17.5705697    | 15.23386881 | 16.07140355 |             |             |
| 8.484788022     |               |             |             |             |             |
| SIGLECL1        | SIGLECL1      | 0           | 2.031182508 | 0           | 0           |
| RTTN RTTN       | 1786.341253   | 1528.464837 | 1041.962664 |             |             |
| 1147.331891     |               |             |             |             |             |
| CMC2 CMC2       | 3808.12814    | 4641.252031 | 2987.49535  |             |             |
| 2766.040895     |               |             |             |             |             |
| CCR4 CCR4       | 8837.99656    | 15823.92733 | 6816.060819 |             |             |
| 6348.506949     |               |             |             |             |             |
| TMED2 TMED2     | 19538.47351   | 23639.91762 | 19070.50603 |             |             |
| 17027.08405     |               |             |             |             |             |
| LMAN2 LMAN2     | 15337.93598   | 22335.89845 | 13849.08559 |             |             |
| 12453.78331     |               |             |             |             |             |
| MRC1 MRC1       | 0 1.015591254 | 44.64278765 | 24.51160984 |             |             |
| SLC25A20        | SLC25A20      | 3854.982993 | 5506.535779 |             |             |
| 2339.282073     | 2571.833525   |             |             |             |             |
| EMP2 EMP2       | 1.171371313   | 0           | 4.464278765 | 0           |             |
| STC1 STC1       | 10.54234182   | 0           | 70.53560449 | 4.713771124 |             |
| SPDYE8P SPDYE8P | 46.85485254   | 30.46773762 | 16.07140355 |             |             |
| 32.99639787     |               |             |             |             |             |
| UBE2Q2P1        | UBE2Q2P1      | 43.3407386  | 56.87311023 |             |             |
| 74.99988325     | 82.01961755   |             |             |             |             |
| CAND1 CAND1     | 17793.13025   | 17447.85774 | 15578.54718 |             |             |
| 15809.04559     |               |             |             |             |             |
| ZC3H11A ZC3H11A | 5264.142683   | 4267.51445  | 6880.346433 |             |             |
| 7007.492152     |               |             |             |             |             |
| ZNF781 ZNF781   | 3.51411394    | 17.26505132 | 74.99988325 |             |             |
| 73.53482953     |               |             |             |             |             |
| ZNF488 ZNF488   | 4.685485254   | 0           | 0           | 62.22177883 |             |
| MMEL1 MMEL1     | 530.631205    | 614.4327087 | 523.2134713 |             |             |
| 629.7598221     |               |             |             |             |             |
| TCTA TCTA       | 1349.419753   | 1695.021803 | 2315.174968 |             |             |
| 1826.114933     |               |             |             |             |             |
| CDC42EP1        | CDC42EP1      | 3.51411394  | 4.062365016 |             |             |
| 16.07140355     | 8.484788022   |             |             |             |             |

|              |              |             |             |             |             |
|--------------|--------------|-------------|-------------|-------------|-------------|
| SNX7         | SNX7         | 0           | 2.031182508 | 0           | 20.74059294 |
| LOC100129034 | LOC100129034 |             | 3993.204808 |             | 5925.974967 |
| 3025.888147  |              | 3515.530504 |             |             |             |
| APBB3        | APBB3        | 510.7178927 | 280.3031861 |             | 567.8562589 |
| 556.2249926  |              |             |             |             |             |
| RNF219       | RNF219       | 2231.462352 | 2059.619063 |             | 2850.888419 |
| 3013.985256  |              |             |             |             |             |
| ABCA11P      | ABCA11P      | 447.4638417 | 486.4682107 |             | 685.7132183 |
| 534.5416454  |              |             |             |             |             |
| SERTAD4      | SERTAD4      | 3.51411394  | 0           | 0.892855753 | 0           |
| MBNL2        | MBNL2        | 1748.857371 | 1523.386881 |             | 1453.569166 |
| 1983.554889  |              |             |             |             |             |
| ZNF445       | ZNF445       | 796.5324932 | 225.4612584 |             | 534.8205961 |
| 397.8422828  |              |             |             |             |             |
| ADAM10       | ADAM10       | 13327.8628  | 13644.4685  |             | 8471.415385 |
| 9222.021826  |              |             |             |             |             |
| EFHB         | EFHB         | 8.199599194 | 10.15591254 | 0           | 10.37029647 |
| APOBEC3F     | APOBEC3F     |             | 3831.555566 |             | 4835.229961 |
| 2247.31793   |              | 2494.527679 |             |             |             |
| RTKN2        | RTKN2        | 576.3146862 | 1414.718617 |             | 707.1417564 |
| 1130.362315  |              |             |             |             |             |
| SLC25A43     | SLC25A43     |             | 229.5887774 |             | 583.9649711 |
| 409.8207906  |              | 580.7366024 |             |             |             |
| C8orf46      | C8orf46      | 0           | 0           | 37.71016899 |             |
| UBR4         | UBR4         | 5261.79994  | 2111.414217 |             | 2933.031149 |
| 3160.112161  |              |             |             |             |             |
| MIR1279      | MIR1279      | 14.05645576 | 8.124730032 |             | 34.82137437 |
| 18.85508449  |              |             |             |             |             |
| KIAA1715     | KIAA1715     |             | 1973.760663 |             | 1418.780982 |
| 1504.461944  |              | 1391.505236 |             |             |             |
| GSTA4        | GSTA4        | 165.1633552 | 128.9800893 |             | 76.78559476 |
| 214.9479632  |              |             |             |             |             |
| KIAA1731     | KIAA1731     |             | 1356.447981 |             | 1088.713824 |
| 1056.248356  |              | 1178.442781 |             |             |             |
| ZNF571       | ZNF571       | 87.85284851 | 110.6994467 |             | 672.320382  |
| 561.8815179  |              |             |             |             |             |
| RB1          | RB1          | 6543.280157 | 6304.790505 |             | 3907.136775 |
| 4633.637014  |              |             |             |             |             |
| ISCA2        | ISCA2        | 2407.168049 | 2678.114137 |             | 2868.745534 |
| 2511.497255  |              |             |             |             |             |
| SNORA25      | SNORA25      | 15.22782708 | 8.124730032 |             | 36.60708587 |
| 29.22538097  |              |             |             |             |             |
| ZCCHC12      | ZCCHC12      | 1.171371313 | 1.015591254 |             | 0.892855753 |
| 3.771016899  |              |             |             |             |             |
| CFDP1        | CFDP1        | 1163.171714 | 1406.593887 |             | 1346.426476 |
| 1458.440786  |              |             |             |             |             |
| ENTPD7       | ENTPD7       | 766.076839  | 611.3859349 |             | 277.6781392 |
| 366.7313934  |              |             |             |             |             |
| RNF126       | RNF126       | 4054.116116 | 4984.521875 |             | 2841.959862 |
| 2883.885173  |              |             |             |             |             |

|             |          |             |             |             |             |
|-------------|----------|-------------|-------------|-------------|-------------|
| CXCL17      | CXCL17   | 1.171371313 | 1.015591254 | 2.678567259 |             |
| 4.713771124 |          |             |             |             |             |
| CDC42EP5    | CDC42EP5 | 0           | 0           | 0.892855753 | 0           |
| C18orf25    | C18orf25 | 2776.411192 | 2762.093557 | 2792.875949 |             |
| 2935.709716 |          |             |             |             |             |
| CCDC151     | CCDC151  | 0           | 0           | 5.357134518 | 2.828262674 |
| CENPBD1     | CENPBD1  | 637.2259945 | 860.2057922 | 1032.141251 |             |
| 886.1889712 |          |             |             |             |             |
| GLS         | GLS      | 9416.653989 | 5764.495958 | 7899.987703 |             |
| 11058.50706 |          |             |             |             |             |
| FOXE3       | FOXE3    | 0           | 0           | 0.892855753 | 0           |
| HERC5       | HERC5    | 4106.827825 | 4246.187033 | 11010.69715 |             |
| 7636.30922  |          |             |             |             |             |
| ZSWIM5      | ZSWIM5   | 14.05645576 | 8.124730032 | 337.4994746 |             |
| 143.2986422 |          |             |             |             |             |
| SIPA1L2     | SIPA1L2  | 48.02622385 | 3.046773762 | 166.0711701 |             |
| 60.33627038 |          |             |             |             |             |
| TLR5        | TLR5     | 83.16736326 | 115.777403  | 224.9996498 |             |
| 175.3522858 |          |             |             |             |             |
| SPPL3       | SPPL3    | 1803.911823 | 1689.943847 | 2841.959862 |             |
| 2408.737044 |          |             |             |             |             |
| GNA11       | GNA11    | 12.88508445 | 5.07795627  | 110.7141134 |             |
| 72.5920753  |          |             |             |             |             |
| UBTD2       | UBTD2    | 802.3893497 | 700.7579653 | 665.177536  |             |
| 522.2858405 |          |             |             |             |             |
| FOXA3       | FOXA3    | 0           | 1.015591254 | 0           | 0           |
| MMP7        | MMP7     | 8.199599194 | 2.031182508 | 12.49998054 |             |
| 6.599279573 |          |             |             |             |             |
| DUSP5       | DUSP5    | 951.1535065 | 448.8913343 | 833.0344176 |             |
| 1087.938375 |          |             |             |             |             |
| KPNA4       | KPNA4    | 1638.748468 | 1423.858938 | 1779.461516 |             |
| 1509.349514 |          |             |             |             |             |
| CEBPE       | CEBPE    | 1.171371313 | 0           | 3.571423012 | 3.771016899 |
| ASIP        | ASIP     | 0           | 1.015591254 | 0           | 0           |
| ARSD        | ARSD     | 84.33873457 | 106.6370817 | 218.7496595 |             |
| 84.84788022 |          |             |             |             |             |
| ARVCF       | ARVCF    | 31.62702546 | 9.140321286 | 154.4640453 |             |
| 86.73338867 |          |             |             |             |             |
| CYP20A1     | CYP20A1  | 2580.531004 | 2308.43892  | 2850.888419 |             |
| 2630.284287 |          |             |             |             |             |
| FLYWCH1     | FLYWCH1  | 3398.14818  | 5172.406257 | 3024.995291 |             |
| 2658.566914 |          |             |             |             |             |
| ADARB2      | ADARB2   | 8.199599194 | 41.63924142 | 127.6783727 |             |
| 52.79423658 |          |             |             |             |             |
| RPL10A      | RPL10A   | 7212.133177 | 7941.923607 | 6983.9177   |             |
| 7397.792401 |          |             |             |             |             |
| ITGAX       | ITGAX    | 889.0708269 | 287.4123249 | 35.71423012 |             |
| 105.5884732 |          |             |             |             |             |
| CTSF        | CTSF     | 265.9012882 | 433.6574655 | 888.3914743 |             |
| 623.1605425 |          |             |             |             |             |

|             |             |             |             |             |             |
|-------------|-------------|-------------|-------------|-------------|-------------|
| BPIFC       | BPIFC       | 0           | 0           | 3.571423012 | 6.599279573 |
| EIF1B       | EIF1B       | 2052.242541 |             | 1787.440607 | 3453.566053 |
| 2914.053309 |             |             |             |             |             |
| NR4A2       | NR4A2       | 482.6049811 |             | 369.6752165 | 2186.603739 |
| 1309.485618 |             |             |             |             |             |
| SVIP        | SVIP        | 1579.008531 |             | 1864.625542 | 2951.78112  |
| 2662.337931 |             |             |             |             |             |
| ACYP2       | ACYP2       | 277.6150013 |             | 196.009112  | 201.7854002 |
| 231.9175393 |             |             |             |             |             |
| MALSU1      | MALSU1      | 1617.663784 |             | 1706.193307 | 1669.640258 |
| 1695.072096 |             |             |             |             |             |
| RNF220      | RNF220      | 3913.551558 |             | 3811.513976 | 5294.634615 |
| 4509.193457 |             |             |             |             |             |
| SLC35E1     | SLC35E1     | 3610.166388 |             | 4596.566016 | 3094.63804  |
| 3029.069324 |             |             |             |             |             |
| ZNF703      | ZNF703      | 0           | 0           | 6.249990271 | 1.885508449 |
| RPF1        | RPF1        | 4263.791581 |             | 4543.755271 | 4241.957683 |
| 4447.914432 |             |             |             |             |             |
| PTRH2       | PTRH2       | 1080.004351 |             | 1508.153012 | 1095.534009 |
| 1300.058076 |             |             |             |             |             |
| GL0D4       | GL0D4       | 3914.72293  |             | 4028.850505 | 4504.457274 |
| 4520.506508 |             |             |             |             |             |
| AGBL2       | AGBL2       | 156.963756  |             | 76.16934405 | 70.53560449 |
| 62.22177883 |             |             |             |             |             |
| ZNF280B     | ZNF280B     | 261.2158029 |             | 282.3343686 | 219.6425152 |
| 381.815461  |             |             |             |             |             |
| LINC00242   | LINC00242   |             |             | 2.342742627 | 9.140321286 |
| 10.71426904 | 4.713771124 |             |             |             |             |
| SLC48A1     | SLC48A1     | 1002.693844 |             | 1348.705185 | 1064.284058 |
| 1059.655749 |             |             |             |             |             |
| GIN1        | GIN1        | 653.6251929 |             | 615.4483    | 743.7488423 |
| 734.4055411 |             |             |             |             |             |
| LINC00278   | LINC00278   |             |             | 14.05645576 | 0           |
| 25.45436407 |             |             |             |             | 0           |
| ANGPTL5     | ANGPTL5     | 0           | 0           | 26.78567259 | 0           |
| PPA1        | PPA1        | 12451.67706 |             | 11706.72039 | 8175.88013  |
| 12449.06954 |             |             |             |             |             |
| PRSS53      | PRSS53      | 110.1089035 |             | 71.09138778 | 122.3212382 |
| 115.9587696 |             |             |             |             |             |
| LONRF1      | LONRF1      | 447.4638417 |             | 636.7757163 | 1330.355072 |
| 1024.773842 |             |             |             |             |             |
| LSP1P3      | LSP1P3      | 0           | 2.031182508 | 0           | 0           |
| HIST1H3B    | HIST1H3B    |             |             | 93.70970508 | 61.9510665  |
| 27.67852834 | 24.51160984 |             |             |             |             |
| MYL6B       | MYL6B       | 1857.794903 |             | 2036.260464 | 552.6777111 |
| 959.7238008 |             |             |             |             |             |
| SNAPC1      | SNAPC1      | 807.074835  |             | 1067.386408 | 1345.53362  |
| 1126.591299 |             |             |             |             |             |
| EMX1        | EMX1        | 0           | 1.015591254 | 8.92855753  | 0           |
| GAST        | GAST        | 0           | 0           | 8.035701777 | 0           |

|                 |              |             |             |             |   |
|-----------------|--------------|-------------|-------------|-------------|---|
| LOC101928336    | LOC101928336 | 0           | 1.015591254 | 0           | 0 |
| ST13P4 ST13P4   | 2.342742627  | 9.140321286 | 4.464278765 |             |   |
| 6.599279573     |              |             |             |             |   |
| NACAP1 NACAP1   | 2.342742627  | 3.046773762 | 1.785711506 |             | 0 |
| PIK3R4 PIK3R4   | 3784.700714  | 3662.222062 | 3955.350986 |             |   |
| 3546.641393     |              |             |             |             |   |
| TFB2M TFB2M     | 1597.750472  | 1857.516404 | 1600.890365 |             |   |
| 1748.809087     |              |             |             |             |   |
| FAM20C FAM20C   | 1.171371313  | 0           | 0.892855753 | 0           |   |
| SLN SLN         | 1.171371313  | 3.046773762 | 0           | 0           |   |
| S100A5 S100A5   | 35.1411394   | 39.60805891 | 6.249990271 |             |   |
| 19.79783872     |              |             |             |             |   |
| HBA2 HBA2       | 2.342742627  | 1.015591254 | 9.821413283 |             | 0 |
| PECAM1 PECAM1   | 214.3609504  | 475.2967069 | 1342.855053 |             |   |
| 646.7293982     |              |             |             |             |   |
| LOC101928736    | LOC101928736 | 995.6656164 | 1468.544953 |             |   |
| 1001.784155     | 941.8114705  |             |             |             |   |
| PHF3 PHF3       | 2969.42628   | 2225.160438 | 5099.099206 |             |   |
| 4825.958876     |              |             |             |             |   |
| LOC148709       | LOC148709    | 2.342742627 | 10.15591254 |             |   |
| 10.71426904     | 6.599279573  |             |             |             |   |
| C15orf27        | C15orf27     | 7.028227881 | 3.046773762 |             | 0 |
| 0               |              |             |             |             |   |
| CYSRT1 CYSRT1   | 23.42742627  | 12.18709505 | 3.571423012 |             |   |
| 11.3130507      |              |             |             |             |   |
| CLIC3 CLIC3     | 494.3186943  | 869.3461135 | 189.2854196 |             |   |
| 214.9479632     |              |             |             |             |   |
| LOC101928449    | LOC101928449 | 0           | 0           | 0.892855753 | 0 |
| RAG2 RAG2       | 1.171371313  | 0           | 0           | 0.942754225 |   |
| ITGA4 ITGA4     | 40091.35457  | 31001.93862 | 7848.202069 |             |   |
| 12029.54391     |              |             |             |             |   |
| SERPINA6        | SERPINA6     | 0           | 0           | 2.678567259 | 0 |
| COL14A1 COL14A1 | 2.342742627  | 0           | 0           | 0           |   |
| ACTRT3 ACTRT3   | 25.7701689   | 67.02902277 | 36.60708587 |             |   |
| 40.53843166     |              |             |             |             |   |
| UBE2J2 UBE2J2   | 4476.98116   | 5885.351317 | 3899.993929 |             |   |
| 3466.507284     |              |             |             |             |   |
| EXOSC3 EXOSC3   | 4048.259259  | 5014.989613 | 3186.602183 |             |   |
| 3586.237071     |              |             |             |             |   |
| AMIG03 AMIG03   | 253.0162037  | 57.88870148 | 98.21413283 |             |   |
| 82.01961755     |              |             |             |             |   |
| CCDC141 CCDC141 | 227.2460348  | 662.1654976 | 693.7489201 |             |   |
| 293.1965639     |              |             |             |             |   |
| CAMSAP3 CAMSAP3 | 121.8226166  | 42.65483267 | 8.035701777 |             |   |
| 73.53482953     |              |             |             |             |   |
| TBCD TBCD       | 5760.80412   | 6765.868934 | 4335.707537 |             |   |
| 4831.615402     |              |             |             |             |   |
| SLC9A3R1        | SLC9A3R1     | 33194.32028 | 45248.65273 |             |   |
| 11433.01792     | 12997.7525   |             |             |             |   |
| DSTNP2 DSTNP2   | 98.39519033  | 128.9800893 | 143.7497762 |             |   |

|              |              |             |             |             |             |
|--------------|--------------|-------------|-------------|-------------|-------------|
| 114.0732612  |              |             |             |             |             |
| CD1A         | CD1A         | 8.199599194 | 0           | 0           | 0           |
| PER1         | PER1         | 640.7401085 | 322.9580188 |             | 1082.141173 |
| 689.1533383  |              |             |             |             |             |
| ZNF43        | ZNF43        | 814.1030629 | 787.0832219 |             | 1829.461438 |
| 1447.127735  |              |             |             |             |             |
| ZNF264       | ZNF264       | 524.7743484 | 372.7219902 |             | 551.7848554 |
| 711.7794397  |              |             |             |             |             |
| TXNDC17      | TXNDC17      | 5692.864583 | 5697.466935 |             | 3151.780808 |
| 4016.132997  |              |             |             |             |             |
| DCST2        | DCST2        | 3.51411394  | 0           | 1.785711506 | 10.37029647 |
| GABPB2       | GABPB2       | 550.5445173 | 618.4950737 |             | 676.7846608 |
| 525.1141032  |              |             |             |             |             |
| LRRC3        | LRRC3        | 106.5947895 | 138.1204106 |             | 147.3211993 |
| 109.3594901  |              |             |             |             |             |
| ZNF157       | ZNF157       | 5.856856567 | 1.015591254 |             | 4.464278765 |
| 50.90872813  |              |             |             |             |             |
| PRKCG        | PRKCG        | 0           | 2.031182508 | 0.892855753 | 0           |
| HIST1H2B0    | HIST1H2B0    |             | 15.22782708 |             | 18.28064257 |
| 7.142846024  |              | 4.713771124 |             |             |             |
| PAK2         | PAK2         | 8349.534722 | 6073.235699 |             | 4060.707965 |
| 4968.314764  |              |             |             |             |             |
| EIF3G        | EIF3G        | 6085.273973 | 8261.834852 |             | 7297.31007  |
| 6561.569404  |              |             |             |             |             |
| ABHD4        | ABHD4        | 1434.929859 | 2081.962071 |             | 3637.494338 |
| 2176.819505  |              |             |             |             |             |
| PYCRL        | PYCRL        | 1221.74028  | 1778.300286 |             | 918.7485699 |
| 1048.342698  |              |             |             |             |             |
| KANTR        | KANTR        | 76.13913537 | 21.32741634 |             | 86.60700804 |
| 75.42033798  |              |             |             |             |             |
| THRIL        | THRIL        | 1646.948067 | 1832.126622 |             | 941.0699637 |
| 936.1549451  |              |             |             |             |             |
| MIR645       | MIR645       | 0           | 4.062365016 | 1.785711506 | 3.771016899 |
| MIR644A      | MIR644A      | 9.370970508 | 4.062365016 | 0           | 7.542033798 |
| MIR643       | MIR643       | 0           | 0           | 0.942754225 |             |
| MIR641       | MIR641       | 1.171371313 | 0           | 0           | 0           |
| KRAS         | KRAS         | 5641.324246 | 3082.319456 |             | 3583.922993 |
| 4362.123798  |              |             |             |             |             |
| BRICD5       | BRICD5       | 249.5020898 | 212.2585721 |             | 202.6782559 |
| 179.1233027  |              |             |             |             |             |
| EXOC6B       | EXOC6B       | 222.5605496 | 419.4391879 |             | 167.8568816 |
| 245.1160984  |              |             |             |             |             |
| FAM219A      | FAM219A      | 192.1048954 | 76.16934405 |             | 86.60700804 |
| 90.50440557  |              |             |             |             |             |
| FLJ43315     | FLJ43315     |             | 5.856856567 | 0           | 7.142846024 |
| 5.656525348  |              |             |             |             |             |
| SERPINB9P1   | SERPINB9P1   |             | 59.73993699 |             | 116.7929942 |
| 121.4283824  |              | 37.71016899 |             |             |             |
| THEGL        | THEGL        | 0           | 1.015591254 | 0           | 2.828262674 |
| LOC100129083 | LOC100129083 |             | 3.51411394  |             | 9.140321286 |

|             |             |             |             |             |
|-------------|-------------|-------------|-------------|-------------|
| 1.785711506 | 5.656525348 |             |             |             |
| ZNF785      | ZNF785      | 291.6714571 | 316.8644713 | 556.2491341 |
| 544.9119419 |             |             |             |             |
| ARRDC4      | ARRDC4      | 35.1411394  | 30.46773762 | 88.39271955 |
| 70.70656685 |             |             |             |             |
| MIR671      | MIR671      | 241.3024906 | 223.4300759 | 210.7139577 |
| 223.4327513 |             |             |             |             |
| TXNDC15     | TXNDC15     | 2048.728427 | 1838.22017  | 1213.390968 |
| 1408.474812 |             |             |             |             |
| DCAF16      | DCAF16      | 1074.147494 | 895.7514861 | 1734.818728 |
| 1651.705402 |             |             |             |             |
| COL5A2      | COL5A2      | 35.1411394  | 280.3031861 | 153.5711895 |
| 40.53843166 |             |             |             |             |
| HIST1H3H    | HIST1H3H    |             | 106.5947895 | 152.3386881 |
| 56.24991244 | 45.25220279 |             |             |             |
| HIST1H3J    | HIST1H3J    |             | 146.4214142 | 56.87311023 |
| 37.49994163 | 62.22177883 |             |             |             |
| AGFG2       | AGFG2       | 2117.839335 | 1929.623383 | 1441.069185 |
| 2044.833913 |             |             |             |             |
| RAD9A       | RAD9A       | 5519.501629 | 7133.512968 | 3483.923148 |
| 3517.416012 |             |             |             |             |
| MYH9        | MYH9        | 103320.8067 | 59925.97754 | 37367.79898 |
| 44895.84169 |             |             |             |             |
| RHPN1       | RHPN1       | 349.0686514 | 176.7128782 | 469.6421261 |
| 394.0712659 |             |             |             |             |
| PPAN        | PPAN        | 3726.132148 | 4431.024641 | 3994.636639 |
| 4105.694649 |             |             |             |             |
| HUNK        | HUNK        | 1.171371313 | 0           | 9.821413283 |
| TMEM8A      | TMEM8A      | 6258.636928 | 4507.193985 | 25.45436407 |
| 3713.508891 |             |             |             | 3048.209541 |
| PELO        | PELO        | 2039.357457 | 3043.726988 | 2306.24641  |
| 1988.26866  |             |             |             |             |
| C2orf15     | C2orf15     | 18.74194102 | 21.32741634 | 74.99988325 |
| 108.4167358 |             |             |             |             |
| TUBB6       | TUBB6       | 1027.292642 | 2202.81743  | 384.8208296 |
| 444.9799941 |             |             |             |             |
| GNPTG       | GNPTG       | 1113.974119 | 1239.02133  | 1785.711506 |
| 1657.361927 |             |             |             |             |
| MY05C       | MY05C       | 125.3367305 | 182.8064257 | 95.53556557 |
| 183.8370738 |             |             |             |             |
| ISG15       | ISG15       | 9568.93226  | 14949.50326 | 23738.35591 |
| 12498.09276 |             |             |             |             |
| ZRSR2       | ZRSR2       | 785.9901513 | 1664.554065 | 2447.317619 |
| 999.3194782 |             |             |             |             |
| TBX6        | TBX6        | 19.91331233 | 3.046773762 | 6.249990271 |
| 17.91233027 |             |             |             |             |
| TUBB1       | TUBB1       | 58.56856567 | 66.01343151 | 73.21417175 |
| 128.2145746 |             |             |             |             |
| ARHGAP15    | ARHGAP15    |             | 7845.845058 | 7990.671987 |
| 7812.487839 | 8184.992179 |             |             |             |

|                 |              |               |               |   |
|-----------------|--------------|---------------|---------------|---|
| LOC100996693    | LOC100996693 | 3.51411394    | 3.046773762   |   |
| 4.464278765     | 1.885508449  |               |               |   |
| TPPP2 TPPP2     | 0 0          | 6.249990271   | 0.942754225   |   |
| MLLT10P1        | MLLT10P1     | 1.171371313   | 3.046773762   |   |
| 0.892855753     | 3.771016899  |               |               |   |
| PVRL3-AS1       | PVRL3-AS1    | 0 0           | 5.357134518   |   |
| 0.942754225     |              |               |               |   |
| DVL3 DVL3       | 3394.634066  | 2562.336734   | 2764.281411   |   |
| 2846.175004     |              |               |               |   |
| PIK3C2A PIK3C2A | 1832.024734  | 1128.321883   | 1435.712051   |   |
| 1928.875144     |              |               |               |   |
| PRR34 PRR34     | 78.481878    | 49.76397145   | 189.2854196   |   |
| 111.2449985     |              |               |               |   |
| HMG2 HMG2       | 45084.91048  | 62989.00076   | 33491.0193    |   |
| 33742.11646     |              |               |               |   |
| TMEM203 TMEM203 | 2691.811278  | 3281.375342   | 4276.779057   |   |
| 3489.133386     |              |               |               |   |
| STAM STAM       | 2651.984654  | 3854.168809   | 2317.853535   |   |
| 2569.948017     |              |               |               |   |
| FRZB FRZB       | 1.171371313  | 0 0           | 12.25580492   |   |
| HOXB7 HOXB7     | 35.1411394   | 73.12257029   | 49.99992217   |   |
| 18.85508449     |              |               |               |   |
| GTF2A2 GTF2A2   | 7644.369192  | 9113.915914   | 4996.420794   |   |
| 5859.217507     |              |               |               |   |
| GABARAP GABARAP | 10477.9164   | 10986.66619   | 16131.22489   |   |
| 12739.43784     |              |               |               |   |
| LOC101929439    | LOC101929439 | 1.171371313   | 7.109138778   | 0 |
| 0               |              |               |               |   |
| CYTIP CYTIP     | 15527.69813  | 18699.06617   | 17650.86538   |   |
| 19499.92838     |              |               |               |   |
| POTEJ POTEJ     | 1.171371313  | 1.015591254   | 0 0.942754225 |   |
| CCDC127 CCDC127 | 999.1797304  | 1245.114877   | 1146.426787   |   |
| 1073.797062     |              |               |               |   |
| NLGN1 NLGN1     | 0 0          | 0 1.885508449 |               |   |
| SLC25A40        | SLC25A40     | 1980.788891   | 1675.725569   |   |
| 1369.640725     | 1697.900359  |               |               |   |
| COG3 COG3       | 1965.561064  | 1606.665364   | 3333.030526   |   |
| 2642.540092     |              |               |               |   |
| MESDC1 MESDC1   | 1219.397537  | 1065.355226   | 479.4635394   |   |
| 464.7778328     |              |               |               |   |
| PHLPP2 PHLPP2   | 1568.466189  | 713.9606516   | 912.4985796   |   |
| 948.4107501     |              |               |               |   |
| EXOSC5 EXOSC5   | 1661.004522  | 2756.314663   | 1966.961224   |   |
| 1992.039677     |              |               |               |   |
| RAB6B RAB6B     | 21.08468364  | 30.46773762   | 16.96425931   |   |
| 63.16453306     |              |               |               |   |
| CCDC67 CCDC67   | 0 0          | 1.785711506   | 0             |   |
| COX7A2L COX7A2L | 4617.545718  | 5885.351317   | 5572.312755   |   |
| 4768.450869     |              |               |               |   |
| DGKI DGKI       | 98.39519033  | 88.3564391    | 0 12.25580492 |   |



|                 |                |               |             |
|-----------------|----------------|---------------|-------------|
| EPM2AIP1        | EPM2AIP1       | 980.4377894   | 717.0074254 |
| 2080.353905     | 1544.23142     |               |             |
| MY01G MY01G     | 33384.08243    | 48925.09307   | 10754.44755 |
| 12923.27491     |                |               |             |
| DOLK DOLK       | 1596.5791      | 1820.955119   | 1370.533581 |
| 1382.077693     |                |               |             |
| DNAJC5 DNAJC5   | 1888.250557    | 1080.589094   | 745.5345538 |
| 900.3302846     |                |               |             |
| ACOT12 ACOT12   | 0 1.015591254  | 8.035701777   | 0           |
| MRPS15 MRPS15   | 4092.771369    | 5735.043812   | 2658.031577 |
| 2967.790299     |                |               |             |
| KLHL20 KLHL20   | 1403.302834    | 1444.170763   | 2024.103992 |
| 1535.746632     |                |               |             |
| TRIM21 TRIM21   | 5357.852388    | 7974.422527   | 11741.94601 |
| 8521.555437     |                |               |             |
| KLK14 KLK14     | 0 4.062365016  | 2.678567259   | 0           |
| SLC16A8 SLC16A8 | 0 5.07795627   | 0             | 9.427542247 |
| PREP PREP       | 5066.180931    | 5782.776601   | 3498.20884  |
| 4357.410027     |                |               |             |
| BSND BSND       | 1.171371313    | 0 0           | 0           |
| TMEM123 TMEM123 | 20549.36695    | 19242.40749   | 28825.84799 |
| 24960.36085     |                |               |             |
| KLHL29 KLHL29   | 11.71371313    | 46.71719769   | 133.928363  |
| 68.8210584      |                |               |             |
| SLC16A9 SLC16A9 | 139.3931863    | 299.5994199   | 49.99992217 |
| 94.27542247     |                |               |             |
| ID02 ID02       | 0 0            | 0 2.828262674 |             |
| SERTAD1 SERTAD1 | 1310.7645      | 1686.897073   | 2267.853613 |
| 1909.077305     |                |               |             |
| IDI1 IDI1       | 5913.08239     | 7708.337618   | 8109.808805 |
| 8302.836457     |                |               |             |
| GRIK1-AS2       | GRIK1-AS2      | 7.028227881   | 11.17150379 |
| 39.28565313     | 22.62610139    |               |             |
| LOC100133331    | LOC100133331   | 85.51010588   | 41.63924142 |
| 89.2855753      | 66.93554995    |               |             |
| LINC01001       | LINC01001      | 4.685485254   | 2.031182508 |
| 2.678567259     | 4.713771124    |               |             |
| LOC100129138    | LOC100129138   | 1.171371313   | 0 0         |
| 7.542033798     |                |               |             |
| LINC01002       | LINC01002      | 3.51411394    | 2.031182508 |
| 2.678567259     | 2.828262674    |               |             |
| PIGP PIGP       | 428.7219007    | 464.1252031   | 488.3920969 |
| 609.0192292     |                |               |             |
| RFNG RFNG       | 718.0506152    | 411.3144579   | 511.6063465 |
| 566.5952891     |                |               |             |
| UPK2 UPK2       | 3.51411394     | 2.031182508   | 7.142846024 |
| 0.942754225     |                |               |             |
| RTEL1-TNFRSF6B  | RTEL1-TNFRSF6B | 2335.714399   | 2216.020116 |
| 1062.498346     | 1318.91316     |               |             |
| RAD50 RAD50     | 3181.444487    | 3487.540366   | 3412.494688 |

|              |              |             |             |             |             |
|--------------|--------------|-------------|-------------|-------------|-------------|
| 3853.036516  |              |             |             |             |             |
| TSPAN1       | TSPAN1       | 3.51411394  | 1.015591254 | 2.678567259 |             |
| 6.599279573  |              |             |             |             |             |
| DBR1         | DBR1         | 1979.61752  | 2007.823909 | 2637.495894 |             |
| 2402.137765  |              |             |             |             |             |
| ATP5F1       | ATP5F1       | 15526.52676 | 20116.83156 | 11875.87437 |             |
| 13207.98669  |              |             |             |             |             |
| CACHD1       | CACHD1       | 31.62702546 | 1.015591254 | 12.49998054 |             |
| 113.130507   |              |             |             |             |             |
| RGS14        | RGS14        | 2651.984654 | 3371.762963 | 2619.638779 |             |
| 3194.051313  |              |             |             |             |             |
| UBE2N        | UBE2N        | 16323.05925 | 19823.32569 | 11963.37423 |             |
| 12966.64161  |              |             |             |             |             |
| TM7SF3       | TM7SF3       | 6298.463552 | 8298.396137 | 4755.349741 |             |
| 4489.395618  |              |             |             |             |             |
| FAM173A      | FAM173A      | 472.0626393 | 508.8112183 | 472.3206934 |             |
| 661.8134658  |              |             |             |             |             |
| TIMELESS     | TIMELESS     |             | 11048.37423 | 9346.486311 |             |
| 4760.706875  | 7030.118254  |             |             |             |             |
| NCMAP        | NCMAP        | 16.39919839 | 15.23386881 | 27.67852834 |             |
| 15.0840676   |              |             |             |             |             |
| FOXR1        | FOXR1        | 1.171371313 | 0           | 13.3928363  | 1.885508449 |
| PNMAL1       | PNMAL1       | 0           | 0           | 3.771016899 |             |
| PTPN23       | PTPN23       | 534.1453189 | 213.2741634 | 321.4280711 |             |
| 293.1965639  |              |             |             |             |             |
| PTGDR2       | PTGDR2       | 354.925508  | 830.7536458 | 388.3922526 |             |
| 345.9908005  |              |             |             |             |             |
| FAM72C       | FAM72C       | 1871.851359 | 2031.182508 | 521.4277598 |             |
| 1350.02405   |              |             |             |             |             |
| MIR638       | MIR638       | 16.39919839 | 18.28064257 | 10.71426904 |             |
| 16.02682182  |              |             |             |             |             |
| MIR590       | MIR590       | 8.199599194 | 2.031182508 | 5.357134518 |             |
| 7.542033798  |              |             |             |             |             |
| MIR589       | MIR589       | 9.370970508 | 7.109138778 | 6.249990271 |             |
| 2.828262674  |              |             |             |             |             |
| MIR573       | MIR573       | 5.856856567 | 13.2026863  | 8.035701777 |             |
| 2.828262674  |              |             |             |             |             |
| MIR568       | MIR568       | 2.342742627 | 0           | 0           | 11.3130507  |
| MIR574       | MIR574       | 0           | 0           | 2.678567259 | 0           |
| SMG7-AS1     | SMG7-AS1     |             | 14.05645576 | 14.21827756 |             |
| 33.03566286  | 4.713771124  |             |             |             |             |
| DGAT2L6      | DGAT2L6      | 1.171371313 | 4.062365016 | 0           | 15.0840676  |
| C10orf91     | C10orf91     |             | 3.51411394  | 5.07795627  | 0           |
| 2.828262674  |              |             |             |             |             |
| C11orf53     | C11orf53     |             | 0           | 0           | 2.678567259 |
| LINC00342    | LINC00342    |             | 92.53833376 | 71.09138778 |             |
| 104.4641231  | 83.905126    |             |             |             |             |
| LOC644050    | LOC644050    |             | 0           | 0           | 4.713771124 |
| LOC100128494 | LOC100128494 |             | 5217.28783  | 3172.707078 |             |
| 3941.95815   | 4317.814349  |             |             |             |             |

|               |               |             |             |             |             |
|---------------|---------------|-------------|-------------|-------------|-------------|
| NCAPG         | NCAPG         | 8545.153732 | 8969.701956 | 3256.244931 |             |
| 4934.375612   |               |             |             |             |             |
| RSPH3         | RSPH3         | 240.1311193 | 247.804266  | 346.4280322 |             |
| 279.9980047   |               |             |             |             |             |
| SLC20A1       | SLC20A1       | 11348.24528 | 15308.00697 | 8185.701544 |             |
| 8715.762807   |               |             |             |             |             |
| GNAQ          | GNAQ          | 1195.970111 | 1356.829915 | 1014.284135 |             |
| 778.7149896   |               |             |             |             |             |
| MALRD1        | MALRD1        | 0           | 8.035701777 | 2.828262674 |             |
| SNORA70F      | SNORA70F      | 0           | 0           | 1.785711506 | 0           |
| EFHC2         | EFHC2         | 0           | 2.031182508 | 86.60700804 | 70.70656685 |
| FAM71D        | FAM71D        | 1.171371313 | 0           | 2.678567259 | 0           |
| C10orf99      | C10orf99      | 0           | 0           | 3.046773762 | 0           |
| BRF2          | BRF2          | 822.302662  | 1181.132628 | 1066.962625 | 0           |
| 795.6845657   |               |             |             |             |             |
| WDR34         | WDR34         | 4384.442826 | 5094.20573  | 2242.853652 |             |
| 2391.767468   |               |             |             |             |             |
| SLC24A5       | SLC24A5       | 76.13913537 | 31.48332888 | 32.14280711 |             |
| 62.22177883   |               |             |             |             |             |
| QRICH2        | QRICH2        | 85.51010588 | 89.37203036 | 134.8212187 |             |
| 103.7029647   |               |             |             |             |             |
| INTS2         | INTS2         | 2995.196449 | 2318.594833 | 1666.961691 |             |
| 2132.510056   |               |             |             |             |             |
| CCDC116       | CCDC116       | 15.22782708 | 9.140321286 | 9.821413283 |             |
| 8.484788022   |               |             |             |             |             |
| LOC100505549  | LOC100505549  |             | 182.7339249 | 168.5881482 |             |
| 308.0352348   | 230.0320308   |             |             |             |             |
| RNF212B       | RNF212B       | 44.51210991 | 32.49892013 | 44.64278765 |             |
| 69.76381263   |               |             |             |             |             |
| HCRT          | HCRT          | 0           | 1.015591254 | 0           | 3.771016899 |
| PXDN          | PXDN          | 118.3085027 | 0           | 0.892855753 | 80.1341091  |
| RPL30         | RPL30         | 9686.069391 | 7595.606989 | 11193.73258 |             |
| 11457.29209   |               |             |             |             |             |
| SERTAD3       | SERTAD3       | 470.891268  | 528.1074521 | 1372.319292 |             |
| 752.3178713   |               |             |             |             |             |
| ZNF225        | ZNF225        | 327.9839678 | 397.0961803 | 701.7846219 |             |
| 680.6685502   |               |             |             |             |             |
| SDHAF2        | SDHAF2        | 3263.440479 | 3547.46025  | 3239.280672 |             |
| 3175.196229   |               |             |             |             |             |
| C10orf32-ASMT | C10orf32-ASMT |             | 600.9134838 | 659.1187239 |             |
| 558.9277014   | 679.725796    |             |             |             |             |
| S100A6        | S100A6        | 13877.23595 | 11971.7897  | 7074.988987 |             |
| 8112.400104   |               |             |             |             |             |
| QDPR          | QDPR          | 1870.679988 | 2241.409898 | 1865.175668 |             |
| 1693.186588   |               |             |             |             |             |
| APOB          | APOB          | 0           | 0           | 0.942754225 |             |
| TLR9          | TLR9          | 99.56656164 | 94.44998663 | 183.0354294 |             |
| 82.96237177   |               |             |             |             |             |
| A4GALT        | A4GALT        | 3.51411394  | 79.21611782 | 0           | 0           |
| MIR6783       | MIR6783       | 11.71371313 | 2.031182508 | 2.678567259 |             |

|             |             |             |             |             |            |
|-------------|-------------|-------------|-------------|-------------|------------|
| 2.828262674 |             |             |             |             |            |
| MIR6781     | MIR6781     | 66.76816487 | 99.5279429  | 108.9284019 |            |
| 92.38991402 |             |             |             |             |            |
| PTGDR       | PTGDR       | 0           | 3.046773762 | 47.32135491 | 11.3130507 |
| SESN2       | SESN2       | 1072.976123 | 1309.097126 | 1903.568465 |            |
| 1187.870323 |             |             |             |             |            |
| TMIGD2      | TMIGD2      | 776.6191808 | 606.3079787 | 1463.390579 |            |
| 871.1049036 |             |             |             |             |            |
| C19orf10    | C19orf10    |             | 5921.28199  | 8483.233745 |            |
| 6149.990427 | 4956.058959 |             |             |             |            |
| FOPNL       | FOPNL       | 3243.527167 | 3091.459777 | 2393.746274 |            |
| 2793.380768 |             |             |             |             |            |
| COMTD1      | COMTD1      | 476.7481246 | 789.1144044 | 563.3919802 |            |
| 499.6597391 |             |             |             |             |            |
| ANKRD22     | ANKRD22     | 19.91331233 | 69.06020528 | 255.3567454 |            |
| 134.8138541 |             |             |             |             |            |
| LAG3        | LAG3        | 7989.923729 | 4488.913343 | 2160.710922 |            |
| 5726.289161 |             |             |             |             |            |
| NPR2        | NPR2        | 139.3931863 | 124.9177242 | 119.6426709 |            |
| 183.8370738 |             |             |             |             |            |
| HIST1H2BL   | HIST1H2BL   |             | 29.28428284 | 38.59246765 |            |
| 0.892855753 | 5.656525348 |             |             |             |            |
| HIST1H2BN   | HIST1H2BN   |             | 113.6230174 | 132.026863  |            |
| 116.9641036 | 63.16453306 |             |             |             |            |
| HIST1H2BG   | HIST1H2BG   |             | 16.39919839 | 12.18709505 |            |
| 8.92855753  | 26.39711829 |             |             |             |            |
| HIST2H2AA3  | HIST2H2AA3  |             | 1.171371313 | 1.015591254 |            |
| 5.357134518 | 2.828262674 |             |             |             |            |
| TTY5        | TTY5        | 0           | 0           | 1.885508449 |            |
| NUTM2A-AS1  | NUTM2A-AS1  |             | 323.2984825 | 591.0741099 |            |
| 563.3919802 | 409.1553335 |             |             |             |            |
| YWHAEP7     | YWHAEP7     | 0           | 1.015591254 | 0           | 0          |
| PSMD4       | PSMD4       | 14468.77846 | 19726.84452 | 11879.44579 |            |
| 11806.11116 |             |             |             |             |            |
| PRKCI       | PRKCI       | 2000.702203 | 2334.844293 | 2323.210669 |            |
| 2069.345523 |             |             |             |             |            |
| ANKRD36B    | ANKRD36B    |             | 980.4377894 | 1207.538001 |            |
| 1524.10477  | 1246.321085 |             |             |             |            |
| KIAA1244    | KIAA1244    |             | 2.342742627 | 4.062365016 |            |
| 9.821413283 | 0           |             |             |             |            |
| MTRNR2L7    | MTRNR2L7    |             | 0           | 1.785711506 | 0          |
| PVRL3       | PVRL3       | 162.8206126 | 30.46773762 | 58.9284797  |            |
| 61.27902461 |             |             |             |             |            |
| PMS2P4      | PMS2P4      | 186.2480388 | 211.2429808 | 126.7855169 |            |
| 145.1841506 |             |             |             |             |            |
| RXFP4       | RXFP4       | 8.199599194 | 5.07795627  | 37.49994163 |            |
| 6.599279573 |             |             |             |             |            |
| SNORD22     | SNORD22     | 42.16936728 | 31.48332888 | 79.46416202 |            |
| 50.90872813 |             |             |             |             |            |
| PP7080      | PP7080      | 812.9316915 | 776.9273093 | 1203.569555 |            |

|              |              |             |             |             |             |
|--------------|--------------|-------------|-------------|-------------|-------------|
| 1116.221002  |              |             |             |             |             |
| KHDRBS3      | KHDRBS3      | 28.11291152 | 42.65483267 | 26.78567259 |             |
| 9.427542247  |              |             |             |             |             |
| GID4         | GID4         | 486.1190951 | 346.3166176 | 434.8207517 |             |
| 568.4807975  |              |             |             |             |             |
| PKD1L1       | PKD1L1       | 11.71371313 | 3.046773762 | 21.42853807 |             |
| 42.42394011  |              |             |             |             |             |
| LOC155060    | LOC155060    |             | 72.62502143 | 29.45214637 |             |
| 143.7497762  | 93.33266825  |             |             |             |             |
| LOC145474    | LOC145474    |             | 4.685485254 | 4.062365016 |             |
| 9.821413283  | 12.25580492  |             |             |             |             |
| AMY2B        | AMY2B        | 51.54033779 | 37.5768764  | 86.60700804 |             |
| 149.8979217  |              |             |             |             |             |
| OSER1        | OSER1        | 2019.444144 | 2776.626489 | 4786.599692 |             |
| 3327.922413  |              |             |             |             |             |
| PGRMC2       | PGRMC2       | 1132.71606  | 371.706399  | 782.1416397 |             |
| 738.176558   |              |             |             |             |             |
| MIR484       | MIR484       | 0           | 1.015591254 | 5.357134518 | 0           |
| AIG1         | AIG1         | 359.6109932 | 248.8198572 | 508.9277792 |             |
| 466.6633412  |              |             |             |             |             |
| GALNT5       | GALNT5       | 9.370970508 | 30.46773762 | 16.07140355 |             |
| 1.885508449  |              |             |             |             |             |
| MFI2         | MFI2         | 84.33873457 | 62.96665775 | 73.21417175 |             |
| 61.27902461  |              |             |             |             |             |
| LOC100505841 | LOC100505841 | 0           | 1.015591254 | 0           | 0           |
| TPBGL        | TPBGL        | 7.028227881 | 0           | 1.785711506 | 6.599279573 |
| MPC1L        | MPC1L        | 0           | 1.015591254 | 0           | 0           |
| MAN2A2       | MAN2A2       | 4770.99536  | 2184.536787 | 2337.496361 |             |
| 3118.630975  |              |             |             |             |             |
| DUSP8        | DUSP8        | 2.342742627 | 7.109138778 | 33.03566286 |             |
| 16.02682182  |              |             |             |             |             |
| DUSP2        | DUSP2        | 5720.977495 | 7387.410782 | 9798.199034 |             |
| 11619.44582  |              |             |             |             |             |
| ELM03        | ELM03        | 36.31251072 | 11.17150379 | 32.14280711 |             |
| 15.0840676   |              |             |             |             |             |
| C2orf61      | C2orf61      | 1.171371313 | 2.031182508 | 2.678567259 |             |
| 6.599279573  |              |             |             |             |             |
| BTN2A3P      | BTN2A3P      | 9.370970508 | 17.26505132 | 60.71419121 |             |
| 81.07686333  |              |             |             |             |             |
| EN01-AS1     | EN01-AS1     |             | 52.71170911 | 88.3564391  |             |
| 82.14272928  | 109.3594901  |             |             |             |             |
| STK4-AS1     | STK4-AS1     |             | 19.91331233 | 36.56128515 |             |
| 54.46420093  | 19.79783872  |             |             |             |             |
| LOC284889    | LOC284889    |             | 22047.55086 | 26270.29897 |             |
| 18305.32865  | 19759.1858   |             |             |             |             |
| C15orf39     | C15orf39     |             | 1308.421757 | 565.6843285 |             |
| 283.9281295  | 205.520421   |             |             |             |             |
| CCR5         | CCR5         | 3970.948753 | 2190.630335 | 165.1783143 |             |
| 1851.569297  |              |             |             |             |             |
| SLC11A1      | SLC11A1      | 42.16936728 | 22.34300759 | 16.07140355 |             |

|              |              |             |             |             |             |   |
|--------------|--------------|-------------|-------------|-------------|-------------|---|
| 2.828262674  |              |             |             |             |             |   |
| ATP5B        | ATP5B        | 78722.00912 | 114298.7021 | 57718.66015 |             |   |
| 62664.87332  |              |             |             |             |             |   |
| FLJ23867     | FLJ23867     |             | 30.45565415 | 6.093547524 |             |   |
| 19.64282657  | 20.74059294  |             |             |             |             |   |
| LOC101928436 | LOC101928436 |             | 1.171371313 | 0           | 0           | 0 |
| MIR647       | MIR647       | 7.028227881 | 3.046773762 | 11.60712479 |             |   |
| 12.25580492  |              |             |             |             |             |   |
| MIR663A      | MIR663A      | 0           | 0           | 1.785711506 | 0           |   |
| AP00P5       | AP00P5       | 0           | 0           | 1.785711506 | 0           |   |
| FAS-AS1      | FAS-AS1      | 91.36696245 | 86.32525659 | 191.0711311 |             |   |
| 107.4739816  |              |             |             |             |             |   |
| PHKA2-AS1    | PHKA2-AS1    |             | 124.1653592 | 77.18493531 |             |   |
| 117.8569594  | 126.3290661  |             |             |             |             |   |
| TMEM55A      | TMEM55A      | 641.9114798 | 649.9784026 | 859.8200902 |             |   |
| 878.6469374  |              |             |             |             |             |   |
| GYLTL1B      | GYLTL1B      | 5.856856567 | 4.062365016 | 21.42853807 |             |   |
| 68.8210584   |              |             |             |             |             |   |
| SNORD116-4   | SNORD116-4   |             | 2.342742627 | 2.031182508 |             |   |
| 8.035701777  | 7.542033798  |             |             |             |             |   |
| ADIPOQ-AS1   | ADIPOQ-AS1   |             | 1.171371313 | 0           | 0           | 0 |
| NEAT1        | NEAT1        | 1631.72024  | 370.6908077 | 799.105899  |             |   |
| 1462.211803  |              |             |             |             |             |   |
| TTY15        | TTY15        | 1113.974119 | 0           | 0           | 1155.81668  |   |
| NCRNA00185   | NCRNA00185   |             | 7.028227881 | 0           | 0           | 0 |
| LOC284009    | LOC284009    |             | 21.08468364 | 8.124730032 |             |   |
| 66.96418148  | 18.85508449  |             |             |             |             |   |
| MIR16-1      | MIR16-1      | 1.171371313 | 0           | 1.785711506 | 1.885508449 |   |
| MIR15A       | MIR15A       | 1.171371313 | 0           | 0           | 0           |   |
| MIR1972-2    | MIR1972-2    |             | 4.685485254 | 0           | 0           | 0 |
| MIR1244-3    | MIR1244-3    |             | 8910.621581 | 8917.906802 |             |   |
| 7433.024144  | 7996.441334  |             |             |             |             |   |
| KCNQ5-AS1    | KCNQ5-AS1    |             | 7.028227881 | 0           | 0           | 0 |
| MIR181A1HG   | MIR181A1HG   |             | 134.707701  | 99.5279429  |             |   |
| 52.67848943  | 34.88190631  |             |             |             |             |   |
| MFN1         | MFN1         | 1543.867391 | 1270.504659 | 920.5342814 |             |   |
| 1355.680575  |              |             |             |             |             |   |
| C19orf33     | C19orf33     |             | 2.342742627 | 7.109138778 |             |   |
| 45.5356434   | 7.542033798  |             |             |             |             |   |
| ARHGAP18     | ARHGAP18     |             | 527.1170911 | 650.9939938 |             |   |
| 635.7132962  | 595.82067    |             |             |             |             |   |
| MYBL2        | MYBL2        | 20687.58877 | 26870.5134  | 5053.563562 |             |   |
| 9229.56386   |              |             |             |             |             |   |
| FAM32A       | FAM32A       | 8725.544914 | 11969.75852 | 7299.095781 |             |   |
| 6744.463724  |              |             |             |             |             |   |
| SOX4         | SOX4         | 1938.619524 | 1185.194993 | 119.6426709 |             |   |
| 501.5452475  |              |             |             |             |             |   |
| SOX2         | SOX2         | 0           | 0           | 3.571423012 | 0           |   |
| SORL1        | SORL1        | 5089.608357 | 3261.063517 | 9557.12798  |             |   |
| 8935.424542  |              |             |             |             |             |   |

|              |              |             |             |             |             |
|--------------|--------------|-------------|-------------|-------------|-------------|
| NDUFB7       | NDUFB7       | 3063.135985 | 4679.844499 | 2550.888886 |             |
| 2514.325517  |              |             |             |             |             |
| KCNMB1       | KCNMB1       | 45.68348122 | 23.35859884 | 0           | 0.942754225 |
| TMA7         | TMA7         | 8392.875461 | 11275.0941  | 8466.05825  |             |
| 7445.872867  |              |             |             |             |             |
| EMP1         | EMP1         | 291.6714571 | 456.0004731 | 195.5354099 |             |
| 354.4755885  |              |             |             |             |             |
| RPL29        | RPL29        | 12904.99776 | 17026.38737 | 13519.62181 |             |
| 13072.23008  |              |             |             |             |             |
| AVIL         | AVIL         | 124.1653592 | 78.20052656 | 139.2854975 |             |
| 113.130507   |              |             |             |             |             |
| EIF1B-AS1    | EIF1B-AS1    |             | 59.73993699 | 64.99784026 |             |
| 208.9282462  | 60.33627038  |             |             |             |             |
| PXN-AS1      | PXN-AS1      | 966.3813336 | 1086.682642 | 766.0702361 |             |
| 714.6077023  |              |             |             |             |             |
| LOC100134317 | LOC100134317 |             | 0           | 0.892855753 | 0           |
| KCNQ1        | KCNQ1        | 312.7561407 | 315.84888   | 458.0350013 |             |
| 575.0800771  |              |             |             |             |             |
| TMEM56-RWDD3 | TMEM56-RWDD3 |             | 301.0424276 | 439.751013  |             |
| 392.8565313  | 392.1857575  |             |             |             |             |
| NOTUM        | NOTUM        | 4.685485254 | 6.093547524 | 23.21424958 |             |
| 8.484788022  |              |             |             |             |             |
| DTX3         | DTX3         | 352.5827654 | 184.8376082 | 333.0351959 |             |
| 428.010418   |              |             |             |             |             |
| CCDC114      | CCDC114      | 3.51411394  | 15.23386881 | 4.464278765 |             |
| 12.25580492  |              |             |             |             |             |
| RIBC2        | RIBC2        | 60.9113083  | 134.0580455 | 73.21417175 |             |
| 143.2986422  |              |             |             |             |             |
| KIAA1279     | KIAA1279     |             | 2018.272773 | 2397.810951 |             |
| 1596.426086  | 2237.155775  |             |             |             |             |
| SCARNA9L     | SCARNA9L     |             | 9.370970508 | 4.062365016 |             |
| 11.60712479  | 10.37029647  |             |             |             |             |
| SRSF4        | SRSF4        | 9582.988715 | 11672.19028 | 8516.951028 |             |
| 9060.810854  |              |             |             |             |             |
| FAM133DP     | FAM133DP     |             | 784.81878   | 806.3794557 |             |
| 1016.069847  | 888.0744797  |             |             |             |             |
| RAX          | RAX          | 2.342742627 | 0           | 0           | 0           |
| PSMB1        | PSMB1        | 21612.9721  | 28574.67552 | 19408.89836 |             |
| 18327.14213  |              |             |             |             |             |
| PSMA7        | PSMA7        | 27312.86492 | 34851.02947 | 20023.18312 |             |
| 20478.50727  |              |             |             |             |             |
| PSMA2        | PSMA2        | 23475.45249 | 27255.42248 | 16348.18884 |             |
| 17106.27541  |              |             |             |             |             |
| SPATA3-AS1   | SPATA3-AS1   |             | 142.9073002 | 120.8553592 |             |
| 34.82137437  | 50.90872813  |             |             |             |             |
| NUMA1        | NUMA1        | 13484.82656 | 7825.130612 | 10503.55508 |             |
| 11107.53028  |              |             |             |             |             |
| TECTA        | TECTA        | 15.22782708 | 10.15591254 | 8.92855753  | 0           |
| PURB         | PURB         | 1037.834984 | 919.1100849 | 844.6415424 |             |
| 731.5772784  |              |             |             |             |             |

|                 |              |             |                         |
|-----------------|--------------|-------------|-------------------------|
| ANKRD13B        | ANKRD13B     | 65.59679355 | 52.81074521             |
| 62.49990271     | 45.25220279  |             |                         |
| LSM12 LSM12     | 3061.964613  | 3943.540839 | 2503.567531             |
| 2781.124963     |              |             |                         |
| SPATA32 SPATA32 | 39.82662466  | 57.88870148 | 79.46416202             |
| 64.10728728     |              |             |                         |
| CCDC13 CCDC13   | 9.370970508  | 15.23386881 | 11.60712479             |
| 12.25580492     |              |             |                         |
| LOC102723439    | LOC102723439 | 31.62702546 | 39.60805891             |
| 64.28561422     | 49.96597391  |             |                         |
| FLJ41941        | FLJ41941     | 0           | 1.015591254 0 0         |
| LMOD1 LMOD1     | 0 0          | 1.785711506 | 0                       |
| CLCA4 CLCA4     | 0 0          | 0           | 0.942754225             |
| LOC101927620    | LOC101927620 | 15.22782708 | 28.43655511             |
| 19.64282657     | 37.71016899  |             |                         |
| CELSR3 CELSR3   | 429.893272   | 184.8376082 | 160.7140355             |
| 231.9175393     |              |             |                         |
| FBX017 FBX017   | 0 0          | 1.785711506 | 1.885508449             |
| SPRYD4 SPRYD4   | 383.0384195  | 513.8891745 | 680.3560838             |
| 526.0568574     |              |             |                         |
| PAGE2 PAGE2     | 0 0          | 0.892855753 | 0                       |
| ZNF467 ZNF467   | 1.171371313  | 0           | 110.7141134 46.19495701 |
| ERICH1 ERICH1   | 807.074835   | 870.3617047 | 825.8915716             |
| 1026.659351     |              |             |                         |
| VPS25 VPS25     | 3884.267275  | 4590.472468 | 2553.567454             |
| 2860.316318     |              |             |                         |
| PBDC1 PBDC1     | 2309.94423   | 2970.604418 | 2513.388945             |
| 2341.801494     |              |             |                         |
| IP04 IP04       | 3327.865902  | 4901.243392 | 3920.529612             |
| 3519.301521     |              |             |                         |
| OR3A4P OR3A4P   | 0 0          | 0           | 4.713771124             |
| PMS2P1 PMS2P1   | 1508.726252  | 1548.776662 | 1424.997782             |
| 1675.274257     |              |             |                         |
| GOLGA8I GOLGA8I | 0 0          | 0.892855753 | 0                       |
| ZBTB26 ZBTB26   | 146.4214142  | 95.46557788 | 101.7855558             |
| 169.6957604     |              |             |                         |
| AP5M1 AP5M1     | 4287.219007  | 4625.002571 | 4941.956593             |
| 4581.785532     |              |             |                         |
| EFCAB6 EFCAB6   | 16.39919839  | 15.23386881 | 14.28569205             |
| 6.599279573     |              |             |                         |
| NAA15 NAA15     | 5196.203147  | 5258.731513 | 5019.635044             |
| 5278.480904     |              |             |                         |
| SPAG7 SPAG7     | 3934.636242  | 4969.288006 | 3378.566169             |
| 3634.317536     |              |             |                         |
| CTTNBP2NL       | CTTNBP2NL    | 188.5907815 | 299.5994199             |
| 125.8926612     | 192.3218618  |             |                         |
| USPL1 USPL1     | 1547.381505  | 1205.506819 | 3069.638079             |
| 2020.322304     |              |             |                         |
| SAMHD1 SAMHD1   | 20040.9918   | 24730.66263 | 13416.9434              |
| 14152.62642     |              |             |                         |



|              |              |             |             |             |             |
|--------------|--------------|-------------|-------------|-------------|-------------|
| RRP1B        | RRP1B        | 6967.316572 | 6358.616842 | 5798.20526  |             |
| 5787.568186  |              |             |             |             |             |
| CST3         | CST3         | 28.11291152 | 20.31182508 | 20.53568232 |             |
| 29.22538097  |              |             |             |             |             |
| TOLLIP-AS1   | TOLLIP-AS1   |             | 32.79839678 | 36.56128515 |             |
| 48.21421066  | 16.96957604  |             |             |             |             |
| STAB2        | STAB2        | 1.171371313 | 1.015591254 | 16.07140355 |             |
| 10.37029647  |              |             |             |             |             |
| NDUFAF6      | NDUFAF6      | 969.8954475 | 1043.012218 | 983.9270398 |             |
| 1013.460792  |              |             |             |             |             |
| POU5F1P4     | POU5F1P4     |             | 15.22782708 | 15.23386881 |             |
| 28.5713841   | 20.74059294  |             |             |             |             |
| ZNF702P      | ZNF702P      | 23.42742627 | 18.28064257 | 388.3922526 |             |
| 287.5400385  |              |             |             |             |             |
| ABCA17P      | ABCA17P      | 10.54234182 | 8.124730032 | 22.32139383 |             |
| 12.25580492  |              |             |             |             |             |
| BCRP3        | BCRP3        | 5.856856567 | 0           | 0           | 15.0840676  |
| GUCY1B2      | GUCY1B2      | 0           | 0           | 1.885508449 |             |
| MIR98        | MIR98        | 7.028227881 | 1.015591254 | 8.92855753  |             |
| 0.942754225  |              |             |             |             |             |
| LINC00312    | LINC00312    |             | 0           | 2.031182508 | 0.892855753 |
| 0            |              |             |             |             |             |
| HSPA12A      | HSPA12A      | 0           | 7.109138778 | 25.89281684 | 0           |
| KRTAP5-AS1   | KRTAP5-AS1   |             | 3.51411394  | 0           | 1.785711506 |
| 6.599279573  |              |             |             |             |             |
| LOC100130331 | LOC100130331 |             | 1.171371313 | 2.031182508 | 0           |
| 0            |              |             |             |             |             |
| SUZ12P1      | SUZ12P1      | 181.5625536 | 61.9510665  | 135.7140745 |             |
| 167.810252   |              |             |             |             |             |
| LOC100131691 | LOC100131691 |             | 187.4194102 | 174.6816957 |             |
| 412.4993579  | 223.4327513  |             |             |             |             |
| ZNF217       | ZNF217       | 1260.395533 | 867.314931  | 899.1057433 |             |
| 922.0136318  |              |             |             |             |             |
| DYNLT3       | DYNLT3       | 729.7643283 | 1082.620277 | 3648.208607 |             |
| 3039.43962   |              |             |             |             |             |
| VTRNA1-2     | VTRNA1-2     |             | 0           | 0           | 0.892855753 |
| EGOT         | EGOT         | 4.685485254 | 30.46773762 | 9.821413283 | 0           |
| 15.0840676   |              |             |             |             |             |
| SEC1P        | SEC1P        | 7.028227881 | 16.24946006 | 58.03562395 |             |
| 55.62249926  |              |             |             |             |             |
| RFXAP        | RFXAP        | 504.8610361 | 460.0628381 | 363.3922915 |             |
| 408.2125793  |              |             |             |             |             |
| IFNAR1       | IFNAR1       | 3733.160376 | 3439.807577 | 4192.850616 |             |
| 4306.501299  |              |             |             |             |             |
| TPST1        | TPST1        | 38.65525334 | 157.4166444 | 144.642632  |             |
| 62.22177883  |              |             |             |             |             |
| TTF2         | TTF2         | 4674.942912 | 4311.184873 | 2613.388789 |             |
| 3365.632582  |              |             |             |             |             |
| FAAHP1       | FAAHP1       | 40.99799597 | 2.031182508 | 3.571423012 |             |
| 33.93915209  |              |             |             |             |             |

|                 |                            |             |               |   |
|-----------------|----------------------------|-------------|---------------|---|
| HIF1A-AS2       | HIF1A-AS2                  | 2615.672143 | 1241.052512   |   |
| 2157.139499     | 4301.787527                |             |               |   |
| MFSD3 MFSD3     | 371.3247064                | 573.8090585 | 430.356473    |   |
| 409.1553335     |                            |             |               |   |
| LGALSL LGALSL   | 98.39519033                | 140.1515931 | 41.07136464   |   |
| 143.2986422     |                            |             |               |   |
| TPT1-AS1        | TPT1-AS1                   | 290.5000857 | 250.8510398   |   |
| 280.3567065     | 450.6365194                |             |               |   |
| LINC00654       | LINC00654                  | 5.856856567 | 4.062365016   | 0 |
| 1.885508449     |                            |             |               |   |
| WEE2-AS1        | WEE2-AS1                   | 3.51411394  | 16.24946006   |   |
| 31.24995136     | 16.02682182                |             |               |   |
| LINC00667       | LINC00667                  | 957.0103631 | 1179.101446   |   |
| 1808.925756     | 1686.587308                |             |               |   |
| LOC100126784    | LOC100126784               | 4.685485254 | 5.07795627    |   |
| 8.035701777     | 4.713771124                |             |               |   |
| CD27-AS1        | CD27-AS1                   | 4225.136328 | 5859.961536   |   |
| 2768.74569      | 3258.158601                |             |               |   |
| TP53TG1 TP53TG1 | 657.1393069                | 707.8671041 | 748.213121    |   |
| 734.4055411     |                            |             |               |   |
| A1BG-AS1        | A1BG-AS1                   | 331.4980817 | 237.6483534   |   |
| 487.4992412     | 376.1589357                |             |               |   |
| ZNF674-AS1      | ZNF674-AS1                 | 159.3064986 | 214.2897546   |   |
| 240.1781976     | 194.2073703                |             |               |   |
| PAX8-AS1        | PAX8-AS1                   | 1816.796907 | 642.8692638   |   |
| 722.3203042     | 1764.835909                |             |               |   |
| MIR4323 MIR4323 | 0 1.015591254 0            | 0.942754225 |               |   |
| VLDLR-AS1       | VLDLR-AS1                  | 4.685485254 | 4.062365016   |   |
| 16.07140355     | 13.19855915                |             |               |   |
| LINC01128       | LINC01128                  | 617.3126822 | 770.8337618   |   |
| 1334.819351     | 1119.049265                |             |               |   |
| SNHG17 SNHG17   | 798.8752358                | 893.7203036 | 1449.997743   |   |
| 1103.965197     |                            |             |               |   |
| LOC441204       | LOC441204                  | 5.856856567 | 0 0 0         |   |
| GLIDR GLIDR     | 99.56656164                | 165.5413744 | 158.0354683   |   |
| 95.2181767      |                            |             |               |   |
| NPHS1 NPHS1     | 0 0                        | 2.678567259 | 0             |   |
| RNF20 RNF20     | 2847.603663                | 3033.571076 | 3414.2804     |   |
| 3584.351562     |                            |             |               |   |
| HCFC1 HCFC1     | 5325.053991                | 2347.031388 | 2856.245554   |   |
| 2396.481239     |                            |             |               |   |
| NPBWR1 NPBWR1   | 0 5.07795627 1.785711506 0 |             |               |   |
| RAC3 RAC3       | 5.856856567                | 1.015591254 | 0 1.885508449 |   |
| TXLNB TXLNB     | 10.54234182                | 14.21827756 | 55.35705669   |   |
| 28.28262674     |                            |             |               |   |
| ROCK2 ROCK2     | 1970.246549                | 1609.712138 | 1796.425775   |   |
| 2192.846327     |                            |             |               |   |
| KL KL           | 37.48388203                | 73.12257029 | 101.7855558   |   |
| 16.96957604     |                            |             |               |   |
| LOC283692       | LOC283692                  | 1.171371313 | 0 7.142846024 |   |

|               |               |             |             |             |             |
|---------------|---------------|-------------|-------------|-------------|-------------|
|               |               | 1.885508449 |             |             |             |
| LOC441081     | LOC441081     | 0           | 2.031182508 | 0.892855753 |             |
|               |               | 2.828262674 |             |             |             |
| EDC4          | EDC4          | 12113.15075 | 12146.4714  | 10074.98432 |             |
| 9209.766021   |               |             |             |             |             |
| GATC          | GATC          | 9023.073228 | 10373.24907 | 6849.989337 |             |
| 7436.445325   |               |             |             |             |             |
| TMEM246       | TMEM246       | 0           | 5.07795627  | 0           | 1.885508449 |
| DKFZP434I0714 | DKFZP434I0714 | 167.5060978 |             |             | 111.7150379 |
| 118.7498152   | 167.810252    |             |             |             |             |
| INGX          | INGX          | 1.171371313 | 6.093547524 |             | 11.60712479 |
| 7.542033798   |               |             |             |             |             |
| ITPKA         | ITPKA         | 289.3287144 | 334.1295226 |             | 28.5713841  |
| 76.3630922    |               |             |             |             |             |
| ABCB6         | ABCB6         | 1951.504608 | 2340.937841 |             | 871.427215  |
| 1092.652146   |               |             |             |             |             |
| KMO           | KMO           | 775.4478095 | 793.1767694 |             | 587.4990855 |
| 591.1068989   |               |             |             |             |             |
| SLC6A16       | SLC6A16       | 46.85485254 | 39.60805891 |             | 48.21421066 |
| 185.7225823   |               |             |             |             |             |
| CECR7         | CECR7         | 12.88508445 | 18.28064257 |             | 83.03558503 |
| 18.85508449   |               |             |             |             |             |
| GPR82         | GPR82         | 166.3347265 | 113.7462205 |             | 60.71419121 |
| 74.47758375   |               |             |             |             |             |
| CHD6          | CHD6          | 804.7320923 | 655.0563589 |             | 1498.211954 |
| 1417.902354   |               |             |             |             |             |
| NCBP2-AS2     | NCBP2-AS2     |             | 1894.107414 |             | 2493.276529 |
| 2583.924549   | 2126.853531   |             |             |             |             |
| C16orf91      | C16orf91      |             | 1041.349098 |             | 1372.063784 |
| 1358.926456   | 1083.224604   |             |             |             |             |
| STRAP         | STRAP         | 10744.98906 | 11074.00703 |             | 7741.952235 |
| 8442.364082   |               |             |             |             |             |
| HMOX1         | HMOX1         | 4387.95694  | 6081.360429 |             | 907.1414451 |
| 1331.168965   |               |             |             |             |             |
| HLA-DRB5      | HLA-DRB5      |             | 3361.83567  |             | 714.9762429 |
| 203.5711117   | 1161.473205   |             |             |             |             |
| PTENP1        | PTENP1        | 10.54234182 | 9.140321286 |             | 8.035701777 |
| 5.656525348   |               |             |             |             |             |
| UBA6-AS1      | UBA6-AS1      |             | 475.5767533 |             | 407.2520929 |
| 735.7131405   | 514.7438067   |             |             |             |             |
| ADPRHL2       | ADPRHL2       | 2826.518979 | 4113.144579 |             | 4395.528872 |
| 3417.484065   |               |             |             |             |             |
| 5-Mar         | 5-Mar         | 2789.035097 | 2701.472736 |             | 2457.139032 |
| 2591.631364   |               |             |             |             |             |
| LOC101927354  | LOC101927354  |             | 19.91331233 |             | 8.124730032 |
| 24.99996108   | 12.25580492   |             |             |             |             |
| CLEC18B       | CLEC18B       | 2.342742627 | 0           | 1.785711506 | 1.885508449 |
| COLGALT1      | COLGALT1      |             | 4227.47907  |             | 4798.668675 |
| 3602.672963   | 3380.71665    |             |             |             |             |
| COX5A         | COX5A         | 14218.105   | 15123.16936 |             | 7592.845324 |

|             |            |             |             |             |
|-------------|------------|-------------|-------------|-------------|
| 9426.599493 |            |             |             |             |
| SLC22A4     | SLC22A4    | 17.5705697  | 5.07795627  | 21.42853807 |
| 45.25220279 |            |             |             |             |
| RYK         | RYK        | 401.7803605 | 282.3343686 | 1442.854897 |
| 1245.378331 |            |             |             |             |
| GOLGA8R     | GOLGA8R    | 0           | 6.093547524 | 2.678567259 |
|             |            |             |             | 5.656525348 |
| XXYLT1-AS2  | XXYLT1-AS2 |             | 89.02421982 | 63.98224901 |
| 24.10710533 |            | 51.85148236 |             |             |
| RAB44       | RAB44      | 7.028227881 | 0           | 0           |
| LOC727896   | LOC727896  |             | 21.08468364 | 2.031182508 |
| 8.035701777 |            | 28.28262674 |             |             |
| PWRN2       | PWRN2      | 0           | 0           | 6.249990271 |
|             |            |             |             | 0.942754225 |
| MUC5B       | MUC5B      | 0           | 0           | 1.885508449 |
| ALMS1       | ALMS1      | 500.1755508 | 219.3677109 | 419.6422039 |
| 479.8619004 |            |             |             |             |
| SUGP1       | SUGP1      | 2461.05113  | 2874.123249 | 2309.817833 |
| 1974.127347 |            |             |             |             |
| TNNC2       | TNNC2      | 5.856856567 | 9.140321286 | 7.142846024 |
| 7.542033798 |            |             |             |             |
| AP3S1       | AP3S1      | 1690.288805 | 2054.541107 | 2341.96064  |
| 2001.467219 |            |             |             |             |
| QPCT        | QPCT       | 125.3367305 | 286.3967336 | 762.4988131 |
| 345.0480462 |            |             |             |             |
| CHAF1B      | CHAF1B     | 3298.581619 | 4029.866096 | 1547.31902  |
| 2142.880353 |            |             |             |             |
| TLR6        | TLR6       | 124.1653592 | 60.93547524 | 34.82137437 |
| 41.48118589 |            |             |             |             |
| KIAA0753    | KIAA0753   |             | 728.592957  | 701.7735565 |
| 574.999105  |            | 617.5040172 |             |             |
| DHRS7B      | DHRS7B     | 1112.802748 | 2042.354012 | 972.319915  |
| 873.9331663 |            |             |             |             |
| KIAA0754    | KIAA0754   |             | 65.59679355 | 41.63924142 |
| 111.6069691 |            | 83.905126   |             |             |
| SLC38A7     | SLC38A7    | 828.1595186 | 1009.497707 | 1172.319604 |
| 964.4375719 |            |             |             |             |
| MOB1A       | MOB1A      | 11015.57583 | 11408.13656 | 7967.84474  |
| 8897.714373 |            |             |             |             |
| C1QL4       | C1QL4      | 0           | 0           | 0.942754225 |
| NUDC        | NUDC       | 11138.56982 | 16459.68745 | 12898.19421 |
| 11591.16319 |            |             |             |             |
| HPGDS       | HPGDS      | 365.4678498 | 803.332682  | 49.10706642 |
| 101.8174563 |            |             |             |             |
| BMP10       | BMP10      | 1.171371313 | 6.093547524 | 0           |
| IKZF5       | IKZF5      | 1697.317033 | 1550.807845 | 3685.708549 |
| 2569.948017 |            |             |             |             |
| SCARNA6     | SCARNA6    | 1.171371313 | 0           | 0           |
| HIATL2      | HIATL2     | 358.4396219 | 433.6574655 | 3.771016899 |
| 488.3466884 |            |             |             | 642.8561422 |
| POP7        | POP7       | 2595.758831 | 3702.845712 | 2414.281956 |
| 2296.549291 |            |             |             |             |

|                 |               |               |               |   |
|-----------------|---------------|---------------|---------------|---|
| PIP4K2A PIP4K2A | 5731.519837   | 2503.432441   | 3341.066228   |   |
| 3936.941642     |               |               |               |   |
| MIR6730 MIR6730 | 3.51411394    | 5.07795627    | 16.96425931   |   |
| 8.484788022     |               |               |               |   |
| ANKK1 ANKK1     | 1.171371313   | 1.015591254   | 19.64282657   |   |
| 38.65292321     |               |               |               |   |
| MED19 MED19     | 863.300658    | 1052.152539   | 1004.462722   |   |
| 923.8991402     |               |               |               |   |
| MEA1 MEA1       | 4872.904664   | 6412.443178   | 4866.063854   |   |
| 4615.724684     |               |               |               |   |
| LOC101927572    | LOC101927572  | 127.6794732   | 136.089228    |   |
| 69.64274874     | 89.56165135   |               |               |   |
| PARVA PARVA     | 0 0           | 7.142846024   | 12.25580492   |   |
| ZNF224 ZNF224   | 906.6413966   | 868.3305222   | 2294.639285   |   |
| 1965.642559     |               |               |               |   |
| CEP350 CEP350   | 4152.511306   | 2954.354958   | 4247.314817   |   |
| 5231.343193     |               |               |               |   |
| LOC100129931    | LOC100129931  | 4311.817805   | 3985.180081   |   |
| 2414.281956     | 3264.75788    |               |               |   |
| CEACAM22P       | CEACAM22P     | 0 0           | 0.892855753   | 0 |
| DDX11-AS1       | DDX11-AS1     | 53.88308042   | 90.38762161   |   |
| 29.46423985     | 21.68334717   |               |               |   |
| PRKAG2-AS1      | PRKAG2-AS1    | 8.199599194   | 19.29623383   |   |
| 124.9998054     | 95.2181767    |               |               |   |
| LOC100288181    | LOC100288181  | 0 1.015591254 | 20.53568232   |   |
| 15.0840676      |               |               |               |   |
| LINC00886       | LINC00886     | 135.8790724   | 55.85751897   |   |
| 17.85711506     | 31.11088942   |               |               |   |
| LINC01125       | LINC01125     | 15.22782708   | 9.140321286   |   |
| 40.17850889     | 13.19855915   |               |               |   |
| LOC643770       | LOC643770     | 35.1411394    | 20.31182508   |   |
| 22.32139383     | 35.82466054   |               |               |   |
| TSC22D1-AS1     | TSC22D1-AS1   | 9.370970508   | 4.062365016   |   |
| 62.49990271     | 18.85508449   |               |               |   |
| SLC7A11-AS1     | SLC7A11-AS1   | 36.31251072   | 18.28064257   |   |
| 25.89281684     | 33.93915209   |               |               |   |
| LOC100128993    | LOC100128993  | 1.171371313   | 0 0           |   |
| 2.828262674     |               |               |               |   |
| DNAJC9-AS1      | DNAJC9-AS1    | 51.54033779   | 37.5768764    |   |
| 67.85703723     | 32.05364364   |               |               |   |
| SASH3 SASH3     | 25513.63858   | 33436.31086   | 9535.699442   |   |
| 13903.73931     |               |               |               |   |
| RPS2P32 RPS2P32 | 77.31050669   | 171.6349219   | 73.21417175   |   |
| 29.22538097     |               |               |               |   |
| ZNF300P1        | ZNF300P1      | 0 0           | 0 2.828262674 |   |
| PRSS30P PRSS30P | 9.370970508   | 12.18709505   | 16.96425931   |   |
| 17.91233027     |               |               |               |   |
| ULK4P3 ULK4P3   | 0 1.015591254 | 0             | 0             |   |
| ULK4P1 ULK4P1   | 0 1.015591254 | 0             | 0             |   |
| BAIAP2-AS1      | BAIAP2-AS1    | 11.71371313   | 0 27.67852834 |   |

|              |              |             |             |             |   |
|--------------|--------------|-------------|-------------|-------------|---|
|              | 35.82466054  |             |             |             |   |
| LINC00265    | LINC00265    | 385.3811621 | 351.3945739 |             |   |
| 265.1781587  | 257.3719033  |             |             |             |   |
| LOC91450     | LOC91450     | 10.54234182 | 7.109138778 |             |   |
| 33.92851862  | 8.484788022  |             |             |             |   |
| LOC285074    | LOC285074    | 1253.367305 | 1075.511138 |             |   |
| 1558.033289  | 1053.056469  |             |             |             |   |
| DBH-AS1      | DBH-AS1      | 1.171371313 | 2.031182508 | 38.39279738 |   |
| 21.68334717  |              |             |             |             |   |
| LBX2-AS1     | LBX2-AS1     | 42.16936728 | 35.54569389 |             | 0 |
|              | 0.942754225  |             |             |             |   |
| HCAR2        | HCAR2        | 2.342742627 | 6.093547524 | 16.07140355 |   |
| 6.599279573  |              |             |             |             |   |
| SNORA1       | SNORA1       | 4.685485254 | 4.062365016 | 10.71426904 |   |
| 4.713771124  |              |             |             |             |   |
| PDRG1        | PDRG1        | 1677.403721 | 2377.499126 | 1942.854119 |   |
| 1881.737433  |              |             |             |             |   |
| NUAK2        | NUAK2        | 188.5907815 | 202.1026596 | 3912.49391  |   |
| 2043.891159  |              |             |             |             |   |
| ALG10        | ALG10        | 372.4960777 | 363.581669  | 251.7853224 |   |
| 377.1016899  |              |             |             |             |   |
| NCAM1-AS1    | NCAM1-AS1    | 0           | 6.093547524 | 0           | 0 |
| LINC01185    | LINC01185    | 3.51411394  | 1.015591254 |             |   |
| 7.142846024  | 0.942754225  |             |             |             |   |
| CMAHP        | CMAHP        | 5508.959287 | 7498.110229 | 2858.924121 |   |
| 3489.133386  |              |             |             |             |   |
| ZNF503-AS2   | ZNF503-AS2   | 3.51411394  | 1.015591254 |             | 0 |
|              | 1.885508449  |             |             |             |   |
| LINC00937    | LINC00937    | 0           | 1.015591254 | 0           |   |
| 5.656525348  |              |             |             |             |   |
| SCAMP2       | SCAMP2       | 7307.014253 | 8235.429479 | 7435.702711 |   |
| 7460.01418   |              |             |             |             |   |
| PDCD7        | PDCD7        | 1171.371313 | 1496.981508 | 1576.78326  |   |
| 1258.57689   |              |             |             |             |   |
| ASNA1        | ASNA1        | 5122.406754 | 7421.940885 | 3743.744172 |   |
| 3918.086558  |              |             |             |             |   |
| SERINC3      | SERINC3      | 12434.10649 | 12470.44501 | 13180.33663 |   |
| 13104.28372  |              |             |             |             |   |
| LOC101929125 | LOC101929125 | 30.45565415 | 21.32741634 |             |   |
| 23.21424958  | 42.42394011  |             |             |             |   |
| ZFP3         | ZFP3         | 59.73993699 | 62.96665775 | 669.6418148 |   |
| 477.0336377  |              |             |             |             |   |
| LOC100133985 | LOC100133985 | 35.1411394  | 33.51451138 |             |   |
| 15.1785478   | 10.37029647  |             |             |             |   |
| LOC100133920 | LOC100133920 | 1.171371313 | 0           | 0           | 0 |
| CIR1         | CIR1         | 1105.77452  | 1200.428862 | 2221.425114 |   |
| 2009.009253  |              |             |             |             |   |
| MYOM2        | MYOM2        | 522.4316058 | 752.5531193 | 393.7493871 |   |
| 229.0892766  |              |             |             |             |   |
| EID1         | EID1         | 9588.845572 | 9287.582018 | 4848.206739 |   |

|                 |               |             |               |   |  |  |
|-----------------|---------------|-------------|---------------|---|--|--|
| 7994.555826     |               |             |               |   |  |  |
| HCG11 HCG11     | 140.5645576   | 128.9800893 | 394.6422428   |   |  |  |
| 313.9371568     |               |             |               |   |  |  |
| FOXD2-AS1       | FOXD2-AS1     | 108.9375322 | 58.90429273   |   |  |  |
| 18.74997081     | 39.59567744   |             |               |   |  |  |
| MIR5684 MIR5684 | 0 0           | 3.571423012 | 0             |   |  |  |
| MIR548AV        | MIR548AV      | 1.171371313 | 0 0           | 0 |  |  |
| NUP160 NUP160   | 11487.63847   | 11245.64196 | 10408.91237   |   |  |  |
| 9317.240003     |               |             |               |   |  |  |
| TTC30B TTC30B   | 195.6190093   | 144.2139581 | 216.0710922   |   |  |  |
| 177.2377942     |               |             |               |   |  |  |
| HCAR3 HCAR3     | 0 1.015591254 | 37.49994163 | 0             |   |  |  |
| HS6ST1 HS6ST1   | 948.8107639   | 889.6579385 | 1174.998171   |   |  |  |
| 929.5556656     |               |             |               |   |  |  |
| SH2B2 SH2B2     | 28.11291152   | 52.81074521 | 80.35701777   |   |  |  |
| 65.99279573     |               |             |               |   |  |  |
| MIR374C MIR374C | 4.685485254   | 5.07795627  | 6.249990271   |   |  |  |
| 1.885508449     |               |             |               |   |  |  |
| SETD2 SETD2     | 4385.614198   | 2493.276529 | 4577.671446   |   |  |  |
| 4660.034133     |               |             |               |   |  |  |
| PIK3C2B PIK3C2B | 268.2440308   | 53.82633646 | 218.7496595   |   |  |  |
| 393.1285117     |               |             |               |   |  |  |
| CHRM1 CHRM1     | 0 0           | 13.3928363  | 0             |   |  |  |
| SSC4D SSC4D     | 51.54033779   | 44.68601518 | 71.42846024   |   |  |  |
| 49.02321969     |               |             |               |   |  |  |
| DENND6A DENND6A | 1366.990323   | 687.555279  | 881.2486282   |   |  |  |
| 1144.503629     |               |             |               |   |  |  |
| SIAH2 SIAH2     | 11118.65651   | 8191.759055 | 5549.991361   |   |  |  |
| 7985.128283     |               |             |               |   |  |  |
| SFPQ SFPQ       | 27111.38905   | 28596.00294 | 17809.79371   |   |  |  |
| 20983.82353     |               |             |               |   |  |  |
| CHRM3 CHRM3     | 3.51411394    | 10.15591254 | 0 13.19855915 |   |  |  |
| BLVRB BLVRB     | 673.5385052   | 793.1767694 | 1368.747869   |   |  |  |
| 972.9223599     |               |             |               |   |  |  |
| SAYSD1 SAYSD1   | 668.85302     | 880.5176173 | 1078.56975    |   |  |  |
| 1103.965197     |               |             |               |   |  |  |
| BRIX1 BRIX1     | 4021.317719   | 4929.679947 | 4462.493054   |   |  |  |
| 4806.161038     |               |             |               |   |  |  |
| TBKBP1 TBKBP1   | 84.33873457   | 12.18709505 | 90.17843106   |   |  |  |
| 69.76381263     |               |             |               |   |  |  |
| DOCK4 DOCK4     | 9.370970508   | 17.26505132 | 24.10710533   |   |  |  |
| 37.71016899     |               |             |               |   |  |  |
| LOC100133091    | LOC100133091  | 234.2742627 | 135.0736368   |   |  |  |
| 262.4995914     | 229.0892766   |             |               |   |  |  |
| LOC389765       | LOC389765     | 44.51210991 | 47.73278894   |   |  |  |
| 307.142379      | 173.4667773   |             |               |   |  |  |
| GPR160 GPR160   | 144.0786716   | 89.37203036 | 236.6067746   |   |  |  |
| 261.1429202     |               |             |               |   |  |  |
| RNF11 RNF11     | 1500.526653   | 1079.573503 | 1978.568349   |   |  |  |
| 1672.445995     |               |             |               |   |  |  |

|             |             |             |             |             |
|-------------|-------------|-------------|-------------|-------------|
| FAM162A     | FAM162A     | 2236.147837 | 2832.484008 | 3150.887952 |
| 2922.538097 |             |             |             |             |
| NBR2        | NBR2        | 241.3024906 | 258.9757698 | 308.9280905 |
| 229.0892766 |             |             |             |             |
| KGFLP1      | KGFLP1      | 7.028227881 | 24.3741901  | 88.39271955 |
| 36.76741476 |             |             |             |             |
| LOC728024   | LOC728024   |             | 18.74194102 | 32.49892013 |
| 48.21421066 | 12.25580492 |             |             |             |
| KGFLP2      | KGFLP2      | 14.05645576 | 26.40537261 | 82.14272928 |
| 49.02321969 |             |             |             |             |
| ZBED3-AS1   | ZBED3-AS1   |             | 0           | 1.015591254 |
| 2.828262674 |             |             |             | 17.85711506 |
| NME7        | NME7        | 1484.127454 | 1401.515931 | 820.534437  |
| 1021.002825 |             |             |             |             |
| ABHD6       | ABHD6       | 653.6251929 | 2366.327622 | 2775.888536 |
| 752.3178713 |             |             |             |             |
| MTVR2       | MTVR2       | 9.370970508 | 6.093547524 | 30.3570956  |
| 9.427542247 |             |             |             |             |
| LOC645752   | LOC645752   |             | 0           | 0           |
| LOC643387   | LOC643387   |             | 4.685485254 | 0.942754225 |
| 5.656525348 |             |             |             | 2.031182508 |
| ASH1L-AS1   | ASH1L-AS1   |             | 253.0162037 | 222.4144846 |
| 323.2137826 | 286.5972843 |             |             |             |
| MAST1       | MAST1       | 39.82662466 | 43.67042392 | 1.785711506 |
| 33.93915209 |             |             |             |             |
| CHCHD2      | CHCHD2      | 23871.376   | 30048.29843 | 16800.8667  |
| 17773.7454  |             |             |             |             |
| COPG1       | COPG1       | 14984.18184 | 21350.77493 | 13876.76411 |
| 14335.52074 |             |             |             |             |
| TAS2R13     | TAS2R13     | 1.171371313 | 0           | 0           |
| LZTS2       | LZTS2       | 648.9397077 | 770.8337618 | 1358.926456 |
| 973.8651141 |             |             |             |             |
| HS6ST3      | HS6ST3      | 0           | 7.142846024 | 0           |
| ORA0V1      | ORA0V1      | 350.2400227 | 312.8021062 | 612.4990466 |
| 444.9799941 |             |             |             |             |
| ESX1        | ESX1        | 0           | 1.015591254 | 0           |
| NDNL2       | NDNL2       | 2116.667963 | 2581.632968 | 5174.991945 |
| 3662.600163 |             |             |             |             |
| MUCL1       | MUCL1       | 0           | 0           | 11.3130507  |
| HSPA5       | HSPA5       | 45326.21297 | 71013.18726 | 58401.69481 |
| 49928.26374 |             |             |             |             |
| CAPN7       | CAPN7       | 2089.726423 | 2060.634654 | 3515.1731   |
| 3049.809917 |             |             |             |             |
| UGGT1       | UGGT1       | 6050.132834 | 4100.957484 | 3143.745106 |
| 3356.20504  |             |             |             |             |
| FBXL12      | FBXL12      | 554.0586313 | 470.2187506 | 606.2490563 |
| 543.0264334 |             |             |             |             |
| RWDD4       | RWDD4       | 1547.381505 | 1492.919143 | 1366.069302 |
| 1228.408755 |             |             |             |             |
| SLC10A4     | SLC10A4     | 0           | 1.015591254 | 0           |
|             |             |             |             | 0.942754225 |



|             |             |             |             |             |             |
|-------------|-------------|-------------|-------------|-------------|-------------|
| TMEM154     | TMEM154     | 1426.73026  | 1297.925623 | 1306.247967 |             |
|             |             | 1132.247824 |             |             |             |
| LGALS2      | LGALS2      | 0           | 0           | 8.035701777 | 0           |
| FBX08       | FBX08       | 1097.574921 | 1186.210585 | 1246.426631 |             |
|             |             | 1231.237017 |             |             |             |
| FBX07       | FBX07       | 9786.807324 | 12316.07514 | 11572.30342 |             |
|             |             | 11242.34413 |             |             |             |
| MY015A      | MY015A      | 3.51411394  | 2.031182508 | 20.53568232 |             |
|             |             | 39.59567744 |             |             |             |
| WHAMMP3     | WHAMMP3     | 2.342742627 | 7.109138778 | 219.6425152 |             |
|             |             | 226.2610139 |             |             |             |
| LOC148696   | LOC148696   |             | 7.028227881 | 0           | 0           |
|             |             | 3.771016899 |             |             |             |
| TINCR       | TINCR       | 0           | 12.18709505 | 99.99984434 | 8.484788022 |
| TTC28-AS1   | TTC28-AS1   |             | 405.2944745 | 215.3053459 |             |
|             |             | 216.963948  |             |             |             |
| LINC00116   | LINC00116   |             | 805.9034637 | 833.8004196 |             |
|             |             | 993.7484531 |             |             |             |
| LOC284837   | LOC284837   |             | 19.91331233 | 11.17150379 |             |
|             |             | 9.821413283 |             |             |             |
| SARNP       | SARNP       | 5403.535869 | 6526.189399 | 4452.67164  |             |
|             |             | 4851.41324  |             |             |             |
| FAM222A-AS1 | FAM222A-AS1 | 0           | 1.015591254 | 0           | 0           |
| LOC400043   | LOC400043   |             | 1.171371313 | 5.07795627  | 0           |
|             |             | 0           |             |             |             |
| FLVCR1-AS1  | FLVCR1-AS1  |             | 245.9879758 | 279.2875949 |             |
|             |             | 182.1425736 |             |             |             |
| GIF         | GIF         | 0           | 1.015591254 | 0           | 0           |
| CTAGE8      | CTAGE8      | 2.342742627 | 2.031182508 | 1.785711506 | 0           |
| SMG1P3      | SMG1P3      | 504.8610361 | 318.8956538 | 680.3560838 |             |
|             |             | 594.8779158 |             |             |             |
| ACTR1B      | ACTR1B      | 1236.968107 | 794.1923607 | 846.4272539 |             |
|             |             | 1028.544859 |             |             |             |
| HDAC6       | HDAC6       | 3463.744974 | 3359.575868 | 2391.960562 |             |
|             |             | 3107.317925 |             |             |             |
| MY05A       | MY05A       | 4824.87844  | 3338.248452 | 1554.461866 |             |
|             |             | 3919.972066 |             |             |             |
| IDUA        | IDUA        | 306.8992841 | 204.1338421 | 282.142418  |             |
|             |             | 410.0980878 |             |             |             |
| ULK1        | ULK1        | 458.0061836 | 232.5703972 | 277.6781392 |             |
|             |             | 199.8638956 |             |             |             |
| UBA2        | UBA2        | 9342.857596 | 6587.124874 | 6735.703801 |             |
|             |             | 6719.952114 |             |             |             |
| EXD3        | EXD3        | 183.9052962 | 153.3542794 | 91.96414256 |             |
|             |             | 278.1124963 |             |             |             |
| MIR4258     | MIR4258     | 8.199599194 | 9.140321286 | 8.035701777 |             |
|             |             | 9.427542247 |             |             |             |
| MAN1B1-AS1  | MAN1B1-AS1  |             | 87.85284851 | 89.37203036 |             |
|             |             | 137.499786  |             |             |             |
| KTN1-AS1    | KTN1-AS1    |             | 46.85485254 | 23.35859884 |             |

|                 |              |             |   |             |   |
|-----------------|--------------|-------------|---|-------------|---|
| 89.2855753      | 50.90872813  |             |   |             |   |
| LOC100272216    | LOC100272216 | 7.028227881 |   | 9.140321286 |   |
| 12.49998054     | 16.02682182  |             |   |             |   |
| ARRDC3-AS1      | ARRDC3-AS1   | 22.25605496 |   | 27.42096386 |   |
| 85.71415229     | 29.22538097  |             |   |             |   |
| HSD52 HSD52     | 1.171371313  | 5.07795627  |   | 8.035701777 |   |
| 0.942754225     |              |             |   |             |   |
| IGFBP7-AS1      | IGFBP7-AS1   | 3.51411394  |   | 1.015591254 | 0 |
| 0.942754225     |              |             |   |             |   |
| LOC100131635    | LOC100131635 | 0           | 0 | 0.892855753 | 0 |
| SIGLEC16        | SIGLEC16     | 0           | 0 | 8.92855753  |   |
| 3.771016899     |              |             |   |             |   |
| GDI1 GDI1       | 4211.079872  | 3880.574182 |   | 4508.028697 |   |
| 4508.250703     |              |             |   |             |   |
| FAM83H FAM83H   | 18.74194102  | 16.24946006 |   | 5.357134518 |   |
| 4.713771124     |              |             |   |             |   |
| RTN4IP1 RTN4IP1 | 1088.20395   | 1534.558385 |   | 732.1417175 |   |
| 668.4127453     |              |             |   |             |   |
| RCN3 RCN3       | 77.31050669  | 43.67042392 |   | 99.99984434 |   |
| 97.10368515     |              |             |   |             |   |
| CBX8 CBX8       | 122.9939879  | 115.777403  |   | 135.7140745 |   |
| 134.8138541     |              |             |   |             |   |
| DDX23 DDX23     | 7681.853074  | 8633.541251 |   | 9511.592337 |   |
| 7682.504177     |              |             |   |             |   |
| ABCC1 ABCC1     | 4450.03962   | 3127.005471 |   | 2447.317619 |   |
| 2803.751064     |              |             |   |             |   |
| LOC653513       | LOC653513    | 3.51411394  |   | 3.046773762 |   |
| 3.571423012     | 3.771016899  |             |   |             |   |
| STK16 STK16     | 2383.740623  | 2003.761544 |   | 1210.712401 |   |
| 1557.429979     |              |             |   |             |   |
| LOC100128361    | LOC100128361 | 242.4738619 |   | 255.928996  |   |
| 153.5711895     | 219.6617344  |             |   |             |   |
| LOC728752       | LOC728752    | 69.11090749 |   | 73.12257029 |   |
| 194.6425542     | 100.874702   |             |   |             |   |
| USP27X USP27X   | 18.74194102  | 14.21827756 |   | 67.85703723 |   |
| 57.50800771     |              |             |   |             |   |
| EPB41L3 EPB41L3 | 1.171371313  | 100.5435342 |   | 178.5711506 |   |
| 21.68334717     |              |             |   |             |   |
| OAF OAF         | 173.3629544  | 255.928996  |   | 112.4998249 |   |
| 115.9587696     |              |             |   |             |   |
| STKLD1 STKLD1   | 62.08267961  | 66.01343151 |   | 102.6784116 |   |
| 87.6761429      |              |             |   |             |   |
| CDRT15P1        | CDRT15P1     | 35.1411394  |   | 8.124730032 |   |
| 4.464278765     | 16.02682182  |             |   |             |   |
| GOLGA8M GOLGA8M | 0 0          | 12.49998054 |   | 0.942754225 |   |
| QS0X2 QS0X2     | 234.2742627  | 108.6682642 |   | 110.7141134 |   |
| 160.2682182     |              |             |   |             |   |
| TSG1 TSG1       | 0 0          | 0.892855753 |   | 0           |   |
| MAPKAPK5-AS1    | MAPKAPK5-AS1 | 1842.567076 |   | 1990.558858 |   |
| 2383.924861     | 1804.431586  |             |   |             |   |

|              |              |             |             |             |   |
|--------------|--------------|-------------|-------------|-------------|---|
| FLJ13224     | FLJ13224     | 92.53833376 | 83.27848283 |             |   |
| 107.1426904  | 66.93554995  |             |             |             |   |
| CCDC177      | CCDC177      | 0           | 3.046773762 | 0.892855753 | 0 |
| BBS1         | BBS1         | 536.4880616 | 647.9472201 | 702.6774776 |   |
| 708.0084228  |              |             |             |             |   |
| LOC101929384 | LOC101929384 | 0           | 0           | 1.785711506 |   |
| 2.828262674  |              |             |             |             |   |
| EVPL         | EVPL         | 4.685485254 | 0           | 0           | 0 |
| FRY          | FRY          | 219.0464356 | 154.3698706 | 222.3210825 |   |
| 139.5276253  |              |             |             |             |   |
| PPAP2B       | PPAP2B       | 0           | 0           | 0.892855753 | 0 |
| NDST2        | NDST2        | 4067.0012   | 4062.365016 | 5459.81293  |   |
| 6044.940089  |              |             |             |             |   |
| PGS1         | PGS1         | 3188.472715 | 2991.931834 | 3370.530468 |   |
| 2943.27869   |              |             |             |             |   |
| C21orf91-OT1 | C21orf91-OT1 |             | 148.7641568 | 125.9333155 |   |
| 166.0711701  | 160.2682182  |             |             |             |   |
| LOC100505666 | LOC100505666 |             | 37.48388203 | 71.09138778 |   |
| 73.21417175  | 56.56525348  |             |             |             |   |
| USP2-AS1     | USP2-AS1     |             | 1.171371313 | 4.062365016 |   |
| 11.60712479  | 2.828262674  |             |             |             |   |
| FLJ30403     | FLJ30403     |             | 12.88508445 | 8.124730032 |   |
| 42.85707615  | 49.02321969  |             |             |             |   |
| LOC100507391 | LOC100507391 | 0           | 2.031182508 | 0           | 0 |
| LGALS17A     | LGALS17A     |             | 33.96976809 | 67.02902277 |   |
| 455.356434   | 259.2574118  |             |             |             |   |
| SPANXA2-OT1  | SPANXA2-OT1  | 0           | 1.015591254 | 6.249990271 |   |
| 0            |              |             |             |             |   |
| LOC100507140 | LOC100507140 | 1.171371313 | 3.046773762 | 0           |   |
| 4.713771124  |              |             |             |             |   |
| ZBED5-AS1    | ZBED5-AS1    | 404.1231031 | 542.3257297 |             |   |
| 624.9990271  | 596.7634242  |             |             |             |   |
| LINC00299    | LINC00299    | 12.88508445 | 8.124730032 |             |   |
| 3.571423012  | 9.427542247  |             |             |             |   |
| LOC100499194 | LOC100499194 | 1.171371313 | 0           | 0           | 0 |
| LINC01191    | LINC01191    | 2.342742627 | 16.24946006 | 0           |   |
| 1.885508449  |              |             |             |             |   |
| LINC01160    | LINC01160    | 118.3085027 | 93.43439537 |             |   |
| 143.7497762  | 136.6993626  |             |             |             |   |
| LINC00959    | LINC00959    | 188.5907815 | 182.8064257 |             |   |
| 276.7852834  | 384.6437237  |             |             |             |   |
| CKMT2-AS1    | CKMT2-AS1    | 228.4174061 | 233.5859884 |             |   |
| 274.9995719  | 222.489997   |             |             |             |   |
| STXBP5-AS1   | STXBP5-AS1   | 60.9113083  | 95.46557788 |             |   |
| 75.89273901  | 73.53482953  |             |             |             |   |
| LOC100288123 | LOC100288123 | 7.028227881 | 2.031182508 |             |   |
| 0.892855753  | 1.885508449  |             |             |             |   |
| SART3        | SART3        | 5718.634752 | 6558.688319 | 6655.346783 |   |
| 5723.460898  |              |             |             |             |   |
| NFE2L3       | NFE2L3       | 4118.541538 | 6054.955057 | 2530.353204 |   |

|              |              |             |             |             |             |
|--------------|--------------|-------------|-------------|-------------|-------------|
| 3102.604154  |              |             |             |             |             |
| MIR1284      | MIR1284      | 2.342742627 | 0           | 1.785711506 | 0           |
| MIR195       | MIR195       | 1.171371313 | 4.062365016 | 2.678567259 |             |
| 1.885508449  |              |             |             |             |             |
| LINC00333    | LINC00333    |             | 8.199599194 | 1.015591254 |             |
| 0.892855753  | 3.771016899  |             |             |             |             |
| LOC100506585 | LOC100506585 |             | 0           | 0           | 0.892855753 |
| NGRN         | NGRN         | 2594.587459 | 3731.282267 | 5874.990855 | 0           |
| 4461.112991  |              |             |             |             |             |
| TBC1D29      | TBC1D29      | 1.171371313 | 0           | 0           | 0           |
| LOC100507577 | LOC100507577 |             | 838.7018604 | 761.6934405 |             |
| 1121.426826  | 965.3803261  |             |             |             |             |
| SMG1P7       | SMG1P7       | 45.68348122 | 12.18709505 | 60.71419121 |             |
| 47.13771124  |              |             |             |             |             |
| MFI2-AS1     | MFI2-AS1     |             | 14.05645576 | 2.031182508 |             |
| 5.357134518  | 21.68334717  |             |             |             |             |
| IPW          | IPW          | 56.22582305 | 33.51451138 | 149.1069108 |             |
| 128.2145746  |              |             |             |             |             |
| PEG3-AS1     | PEG3-AS1     |             | 0           | 0           | 2.678567259 |
| RNU4ATAC     | RNU4ATAC     |             | 16.39919839 | 26.40537261 | 0           |
| 33.92851862  | 23.56885562  |             |             |             |             |
| LOC284454    | LOC284454    |             | 83.16736326 | 88.3564391  |             |
| 135.7140745  | 71.64932108  |             |             |             |             |
| ENPP6        | ENPP6        | 33.96976809 | 42.65483267 | 22.32139383 |             |
| 14.14131337  |              |             |             |             |             |
| SLC25A28     | SLC25A28     |             | 1001.522473 | 884.5799823 |             |
| 1351.78361   | 1395.276253  |             |             |             |             |
| ZNF750       | ZNF750       | 3.51411394  | 2.031182508 | 0           | 1.885508449 |
| FAM118B      | FAM118B      | 1621.177898 | 1930.638974 | 1581.247539 |             |
| 1439.585701  |              |             |             |             |             |
| OAS3         | OAS3         | 15220.79885 | 12122.09721 | 15032.11946 |             |
| 10966.11714  |              |             |             |             |             |
| PI4KAP1      | PI4KAP1      | 71.45365012 | 116.7929942 | 353.5708782 |             |
| 137.6421168  |              |             |             |             |             |
| DPY19L2P2    | DPY19L2P2    |             | 124.1653592 | 129.9956805 |             |
| 199.9996887  | 126.3290661  |             |             |             |             |
| MAP9         | MAP9         | 183.9052962 | 149.2919143 | 335.7137631 |             |
| 240.4023273  |              |             |             |             |             |
| LOC728392    | LOC728392    |             | 180.3911823 | 107.6526729 |             |
| 396.4279543  | 231.9175393  |             |             |             |             |
| NBPF12       | NBPF12       | 324.4698538 | 175.697287  | 898.2128875 |             |
| 539.2554165  |              |             |             |             |             |
| MIR548J      | MIR548J      | 2.342742627 | 0           | 3.571423012 | 0           |
| LOC728989    | LOC728989    |             | 32.79839678 | 13.2026863  |             |
| 4.464278765  | 31.11088942  |             |             |             |             |
| ICMT         | ICMT         | 6231.695388 | 6306.821688 | 3538.387349 |             |
| 4526.163033  |              |             |             |             |             |
| TMEM144      | TMEM144      | 0           | 1.015591254 | 7.142846024 | 0           |
| ABHD1        | ABHD1        | 269.4154021 | 293.5058724 | 290.1781197 |             |
| 303.5668604  |              |             |             |             |             |

|             |            |             |             |             |             |
|-------------|------------|-------------|-------------|-------------|-------------|
| DACT3       | DACT3      | 25.7701689  | 91.40321286 | 114.2855364 |             |
| 49.02321969 |            |             |             |             |             |
| MAB21L2     | MAB21L2    | 1.171371313 | 0           | 0           | 0           |
| IFITM2      | IFITM2     | 8510.012592 | 5100.299278 | 7717.845129 |             |
| 14962.4523  |            |             |             |             |             |
| ITGA5       | ITGA5      | 749.6776406 | 896.7670773 | 2455.353321 |             |
| 2399.309502 |            |             |             |             |             |
| UBR7        | UBR7       | 9030.101455 | 9308.909435 | 5216.063309 |             |
| 6036.455301 |            |             |             |             |             |
| USE1        | USE1       | 966.3813336 | 674.3525927 | 881.2486282 |             |
| 958.7810465 |            |             |             |             |             |
| SNTA1       | SNTA1      | 460.3489262 | 523.0294958 | 738.3917078 |             |
| 744.7758375 |            |             |             |             |             |
| TLR3        | TLR3       | 26.94154021 | 12.18709505 | 99.99984434 |             |
| 165.9247436 |            |             |             |             |             |
| TRIP6       | TRIP6      | 1215.883423 | 1207.538001 | 732.1417175 |             |
| 830.566472  |            |             |             |             |             |
| GNPDA1      | GNPDA1     | 2033.5006   | 2182.505605 | 4008.029475 |             |
| 3636.203045 |            |             |             |             |             |
| TPSG1       | TPSG1      | 1.171371313 | 1.015591254 | 4.464278765 |             |
| 1.885508449 |            |             |             |             |             |
| KCNH4       | KCNH4      | 50.36896648 | 47.73278894 | 60.71419121 |             |
| 36.76741476 |            |             |             |             |             |
| PPM1A       | PPM1A      | 1445.472201 | 1076.526729 | 1381.24785  |             |
| 1445.242226 |            |             |             |             |             |
| RDH10       | RDH10      | 9115.611561 | 8189.727873 | 2801.781353 |             |
| 3760.646602 |            |             |             |             |             |
| TEDDM1      | TEDDM1     | 1.171371313 | 0           | 0           | 4.713771124 |
| ZDHHC24     | ZDHHC24    | 1323.649584 | 1615.805685 | 796.4273317 |             |
| 820.1961755 |            |             |             |             |             |
| MRPS9       | MRPS9      | 2463.393872 | 3017.321616 | 2467.853301 |             |
| 2574.661788 |            |             |             |             |             |
| NUP85       | NUP85      | 4574.204979 | 4764.138573 | 3134.816549 |             |
| 3861.521304 |            |             |             |             |             |
| TEKT5       | TEKT5      | 0           | 6.093547524 | 0           | 9.427542247 |
| TOR4A       | TOR4A      | 976.9236754 | 678.4149577 | 73.21417175 |             |
| 186.6653365 |            |             |             |             |             |
| WDR18       | WDR18      | 5065.009559 | 8046.529506 | 4370.528911 |             |
| 4234.851977 |            |             |             |             |             |
| HSPA7       | HSPA7      | 0           | 0           | 0.892855753 | 0           |
| DLGAP1-AS1  | DLGAP1-AS1 | 384.8208296 | 749.4896086 | 385.3811621 | 238.6639447 |
| 0ACYLP      | 0ACYLP     | 0           | 0           | 1.785711506 | 3.771016899 |
| JAZF1-AS1   | JAZF1-AS1  | 8.92855753  | 26.39711829 | 4.685485254 | 6.093547524 |
| LINC00858   | LINC00858  | 0           | 0           | 1.171371313 | 3.046773762 |
| 0           |            |             |             |             | 0           |
| PMS2P5      | PMS2P5     | 319.7843686 | 601.2300224 | 324.9994941 |             |
| 269.6277083 |            |             |             |             |             |
| ACTL10      | ACTL10     | 214.3609504 | 459.0472468 | 524.9991828 |             |

|             |             |             |             |             |             |
|-------------|-------------|-------------|-------------|-------------|-------------|
| 395.0140202 |             |             |             |             |             |
| ZCCHC8      | ZCCHC8      | 1714.887603 | 1622.914824 | 2387.496284 |             |
| 2330.488443 |             |             |             |             |             |
| CAMK1D      | CAMK1D      | 115.96576   | 89.37203036 | 341.0708977 |             |
| 301.6813519 |             |             |             |             |             |
| IFI30       | IFI30       | 3452.031261 | 4610.784293 | 3255.352076 |             |
| 2295.606537 |             |             |             |             |             |
| PYG02       | PYG02       | 3229.470711 | 3218.408684 | 3306.244853 |             |
| 3345.834744 |             |             |             |             |             |
| GPT         | GPT         | 0           | 0           | 0.892855753 | 0           |
| OTUD6B      | OTUD6B      | 1470.070998 | 1031.840714 | 1216.069536 |             |
| 1489.551675 |             |             |             |             |             |
| ADAP2       | ADAP2       | 9.370970508 | 26.40537261 | 72.321316   |             |
| 16.96957604 |             |             |             |             |             |
| UBE2Z       | UBE2Z       | 7372.611047 | 8020.124133 | 9633.020719 |             |
| 8746.873697 |             |             |             |             |             |
| TMSB15B     | TMSB15B     | 208.5040938 | 150.3075056 | 209.821102  |             |
| 157.4399555 |             |             |             |             |             |
| ZNF367      | ZNF367      | 2096.754651 | 1633.070737 | 1954.461243 |             |
| 1880.794678 |             |             |             |             |             |
| LOC440461   | LOC440461   |             | 5.856856567 | 2.031182508 |             |
| 42.85707615 | 70.70656685 |             |             |             |             |
| IGF2-AS     | IGF2-AS     | 0           | 0           | 1.885508449 |             |
| UGCG        | UGCG        | 848.0728309 | 774.8961268 | 1096.426865 |             |
| 1084.167358 |             |             |             |             |             |
| DBF4        | DBF4        | 3495.371999 | 3687.611843 | 2001.782598 |             |
| 2603.887169 |             |             |             |             |             |
| HIST2H2BC   | HIST2H2BC   |             | 8.199599194 | 3.046773762 | 0           |
| 3.771016899 |             |             |             |             |             |
| POM121L9P   | POM121L9P   |             | 0           | 1.015591254 | 0.892855753 |
| 0.942754225 |             |             |             |             |             |
| BIN3-IT1    | BIN3-IT1    |             | 9.370970508 | 3.046773762 |             |
| 24.99996108 | 4.713771124 |             |             |             |             |
| SNORD119    | SNORD119    |             | 15.22782708 | 18.28064257 |             |
| 25.89281684 | 20.74059294 |             |             |             |             |
| LINC01144   | LINC01144   |             | 16.39919839 | 10.15591254 |             |
| 33.92851862 | 32.99639787 |             |             |             |             |
| MST02P      | MST02P      | 2140.09539  | 2659.833494 | 3601.780108 |             |
| 3427.854361 |             |             |             |             |             |
| FAM86C2P    | FAM86C2P    |             | 77.31050669 | 101.5591254 |             |
| 166.9640258 | 215.8907175 |             |             |             |             |
| PSMD5-AS1   | PSMD5-AS1   |             | 443.9497278 | 717.0074254 |             |
| 1932.13985  | 518.5148236 |             |             |             |             |
| RBAKDN      | RBAKDN      | 1.171371313 | 5.07795627  | 6.249990271 |             |
| 0.942754225 |             |             |             |             |             |
| MIR4305     | MIR4305     | 0           | 2.031182508 | 0.892855753 | 0           |
| WDFY3-AS2   | WDFY3-AS2   | 0           | 0           | 3.571423012 | 0           |
| CWC25       | CWC25       | 1598.921843 | 2227.19162  | 2377.67487  |             |
| 1733.725019 |             |             |             |             |             |
| ANKLE2      | ANKLE2      | 6547.965642 | 7744.898903 | 6599.096871 |             |

|              |              |             |             |             |             |
|--------------|--------------|-------------|-------------|-------------|-------------|
| 6818.941307  |              |             |             |             |             |
| LOC653653    | LOC653653    |             | 1.171371313 | 0           | 2.678567259 |
|              | 2.828262674  |             |             |             |             |
| LINC01366    | LINC01366    |             | 25.7701689  |             | 28.43655511 |
| 68.74989298  | 17.91233027  |             |             |             |             |
| MDS2         | MDS2         | 22.25605496 | 17.26505132 |             | 173.2140161 |
| 163.0964809  |              |             |             |             |             |
| VAC14-AS1    | VAC14-AS1    |             | 284.6432292 |             | 451.9381081 |
| 471.4278376  | 394.0712659  |             |             |             |             |
| LOC100130950 | LOC100130950 |             | 35.1411394  |             | 29.45214637 |
| 76.78559476  | 35.82466054  |             |             |             |             |
| DECR2        | DECR2        | 336.183567  | 314.8332888 |             | 224.9996498 |
| 404.4415624  |              |             |             |             |             |
| PDS5B        | PDS5B        | 6984.887142 | 6300.72814  |             | 5363.384508 |
| 5713.090602  |              |             |             |             |             |
| TOP3A        | TOP3A        | 4308.303691 | 3877.527408 |             | 3579.458714 |
| 2926.309114  |              |             |             |             |             |
| TSPAN8       | TSPAN8       | 0           | 0           | 0.942754225 |             |
| NICN1        | NICN1        | 829.3308899 | 1050.121357 |             | 492.8563757 |
| 775.8867269  |              |             |             |             |             |
| SLC25A33     | SLC25A33     |             | 1409.15969  |             | 1961.106712 |
| 1678.568816  | 1509.349514  |             |             |             |             |
| COQ5         | COQ5         | 3228.29934  | 4201.501018 |             | 2607.138799 |
| 2548.264669  |              |             |             |             |             |
| WDR24        | WDR24        | 1753.542856 | 2232.269576 |             | 2017.854002 |
| 1718.640952  |              |             |             |             |             |
| LOC101060211 | LOC101060211 |             | 0           | 0           | 0.942754225 |
| PTPLAD2      | PTPLAD2      | 1773.456169 | 1230.8966   |             | 899.1057433 |
| 1177.500027  |              |             |             |             |             |
| CASC10       | CASC10       | 2.342742627 | 2.031182508 |             | 0           |
| ASPHD1       | ASPHD1       | 7.028227881 | 5.07795627  |             | 23.21424958 |
| 13.19855915  |              |             |             |             |             |
| COL6A4P1     | COL6A4P1     |             | 4.685485254 |             | 1.015591254 |
|              | 3.771016899  |             |             |             | 0           |
| AASDHPPT     | AASDHPPT     |             | 4098.628226 |             | 4070.489746 |
| 4387.49317   | 4670.404429  |             |             |             |             |
| TAS1R3       | TAS1R3       | 4.685485254 | 9.140321286 |             | 23.21424958 |
| 5.656525348  |              |             |             |             |             |
| LOC93622     | LOC93622     |             | 998.0083591 |             | 1075.511138 |
| 1501.783377  | 1388.676973  |             |             |             |             |
| TRAF7        | TRAF7        | 1912.849355 | 943.484275  |             | 855.3558114 |
| 837.1657515  |              |             |             |             |             |
| WRN          | WRN          | 1335.363297 | 1195.350906 |             | 1192.855286 |
| 1263.290661  |              |             |             |             |             |
| ZNF19        | ZNF19        | 39.82662466 | 63.98224901 |             | 166.0711701 |
| 119.7297865  |              |             |             |             |             |
| ZNF17        | ZNF17        | 523.6029771 | 529.1230434 |             | 924.9985601 |
| 833.3947346  |              |             |             |             |             |
| BEST4        | BEST4        | 10.54234182 | 11.17150379 |             | 66.07132572 |
| 14.14131337  |              |             |             |             |             |

|                 |             |             |             |             |
|-----------------|-------------|-------------|-------------|-------------|
| MCM3AP MCM3AP   | 8300.337127 | 5666.999198 | 6075.883399 |             |
| 6198.609028     |             |             |             |             |
| TMEM63A TMEM63A | 3549.25508  | 3165.597939 | 3249.994941 |             |
| 3825.696644     |             |             |             |             |
| GTPBP4 GTPBP4   | 7187.534379 | 9413.515334 | 7079.453266 |             |
| 7920.078242     |             |             |             |             |
| NFYC-AS1        | NFYC-AS1    | 657.1393069 | 702.7891478 |             |
| 822.3201485     | 576.9655855 |             |             |             |
| NDUFB2-AS1      | NDUFB2-AS1  | 1549.724248 | 2312.501285 |             |
| 1435.712051     | 1294.401551 |             |             |             |
| LINC00926       | LINC00926   | 28.11291152 | 10.15591254 |             |
| 1.785711506     | 9.427542247 |             |             |             |
| PTGES2-AS1      | PTGES2-AS1  | 8.199599194 | 9.140321286 |             |
| 7.142846024     | 12.25580492 |             |             |             |
| ANP32AP1        | ANP32AP1    | 0           | 5.07795627  | 0           |
| HTR7P1 HTR7P1   | 21.08468364 | 5.07795627  | 10.71426904 | 0           |
| 1.885508449     |             |             |             |             |
| PLOD3 PLOD3     | 1897.621528 | 2078.915297 | 1554.461866 |             |
| 1458.440786     |             |             |             |             |
| PROCA1 PROCA1   | 63.25405093 | 24.3741901  | 89.2855753  |             |
| 49.96597391     |             |             |             |             |
| SLC35G3 SLC35G3 | 4.685485254 | 2.031182508 | 8.035701777 |             |
| 0.942754225     |             |             |             |             |
| ZNF597 ZNF597   | 174.5343257 | 161.4790094 | 348.2137437 |             |
| 326.1929618     |             |             |             |             |
| ARX ARX         | 3.51411394  | 2.031182508 | 0           | 0           |
| EIF3I EIF3I     | 14918.58505 | 25314.6276  | 12995.51549 |             |
| 12219.98026     |             |             |             |             |
| NABP2 NABP2     | 1321.306842 | 518.9671308 | 303.570956  |             |
| 389.3574948     |             |             |             |             |
| C7orf26 C7orf26 | 1579.008531 | 1352.76755  | 1330.355072 |             |
| 1379.249431     |             |             |             |             |
| PDAP1 PDAP1     | 7161.76421  | 5112.486373 | 3273.209191 |             |
| 3671.084951     |             |             |             |             |
| SDCCAG8 SDCCAG8 | 520.0888632 | 1429.952486 | 1371.426437 |             |
| 907.8723184     |             |             |             |             |
| GPR75 GPR75     | 11.71371313 | 2.031182508 | 19.64282657 | 0           |
| TEX15 TEX15     | 5.856856567 | 1.015591254 | 0           | 2.828262674 |
| WDR3 WDR3       | 3687.476895 | 4671.719769 | 4566.064321 |             |
| 4954.173451     |             |             |             |             |
| PEX14 PEX14     | 517.7461205 | 316.8644713 | 269.6424374 |             |
| 234.745802      |             |             |             |             |
| NDUFA10 NDUFA10 | 6362.888975 | 7533.655923 | 4709.814097 |             |
| 6416.385253     |             |             |             |             |
| CPLX1 CPLX1     | 24.59879758 | 1.015591254 | 2.678567259 |             |
| 9.427542247     |             |             |             |             |
| JOSD1 JOSD1     | 917.1837384 | 831.7692371 | 741.9631308 |             |
| 882.4179543     |             |             |             |             |
| PRKCA PRKCA     | 454.4920696 | 431.626283  | 313.3923693 |             |
| 336.5632582     |             |             |             |             |



|              |              |             |             |             |             |
|--------------|--------------|-------------|-------------|-------------|-------------|
| DMRTA1       | DMRTA1       | 0           | 4.062365016 | 13.3928363  | 0           |
| C7           | C7           | 0           | 0           | 0           | 0.942754225 |
| NUCB1        | NUCB1        | 7984.066873 | 6799.383446 | 5376.777345 |             |
|              |              | 5732.88844  |             |             |             |
| GTF3C3       | GTF3C3       | 3845.612022 | 4047.131147 | 3448.208918 |             |
|              |              | 3834.181432 |             |             |             |
| HCFC2        | HCFC2        | 1638.748468 | 1839.235761 | 1113.391124 |             |
|              |              | 1729.954002 |             |             |             |
| CCNB2        | CCNB2        | 12011.24145 | 13546.97174 | 2104.46101  |             |
|              |              | 4281.989689 |             |             |             |
| ZNF443       | ZNF443       | 330.3267104 | 331.0827488 | 532.1420288 |             |
|              |              | 455.3502905 |             |             |             |
| BHLHE40      | BHLHE40      | 9749.323442 | 16207.82082 | 12513.37338 |             |
|              |              | 13810.40664 |             |             |             |
| IER2         | IER2         | 9689.583505 | 15047.00002 | 10771.4118  |             |
|              |              | 8598.861284 |             |             |             |
| ORM1         | ORM1         | 1.171371313 | 0           | 0           | 0           |
| VPS26A       | VPS26A       | 5021.668821 | 5828.478207 | 4620.528522 |             |
|              |              | 4953.230697 |             |             |             |
| MIR8052      | MIR8052      | 0           | 1.015591254 | 0           | 0           |
| SNORD4A      | SNORD4A      | 30.45565415 | 17.26505132 | 60.71419121 |             |
|              |              | 43.36669434 |             |             |             |
| SNORD4B      | SNORD4B      | 0           | 2.031182508 | 8.92855753  | 3.771016899 |
| SNORD73A     | SNORD73A     |             | 12.88508445 | 12.18709505 |             |
|              |              | 12.49998054 | 31.11088942 |             |             |
| IL2RB        | IL2RB        | 34398.48999 | 30405.78656 | 18109.79324 |             |
|              |              | 29989.95464 |             |             |             |
| PSMB7        | PSMB7        | 8160.943941 | 10868.8576  | 5877.669422 |             |
|              |              | 6779.34563  |             |             |             |
| HERC2        | HERC2        | 1685.60332  | 1214.64714  | 866.0700804 |             |
|              |              | 968.2085888 |             |             |             |
| SNHG10       | SNHG10       | 417.0081876 | 403.1897279 | 649.1061325 |             |
|              |              | 578.851094  |             |             |             |
| LOC100303749 | LOC100303749 |             | 3.51411394  | 1.015591254 |             |
|              |              | 2.678567259 | 2.828262674 |             |             |
| NUFIP1       | NUFIP1       | 707.5082733 | 918.0944937 | 784.8202069 |             |
|              |              | 812.6541417 |             |             |             |
| SMYD5        | SMYD5        | 1398.617348 | 1875.797046 | 2526.781781 |             |
|              |              | 2181.533276 |             |             |             |
| FAM86HP      | FAM86HP      | 40.99799597 | 24.3741901  | 33.92851862 |             |
|              |              | 23.56885562 |             |             |             |
| NCRUPAR      | NCRUPAR      | 1.171371313 | 0           | 0           | 0           |
| SMAD5-AS1    | SMAD5-AS1    |             | 1.171371313 | 4.062365016 |             |
|              |              | 16.07140355 | 10.37029647 |             |             |
| LINC00240    | LINC00240    |             | 1.171371313 | 0           | 1.785711506 |
|              |              | 11.3130507  |             |             |             |
| LOC554206    | LOC554206    |             | 44.51210991 | 41.63924142 |             |
|              |              | 150.8926223 | 130.100083  |             |             |
| CIRBP-AS1    | CIRBP-AS1    |             | 55.05445173 | 53.82633646 |             |
|              |              | 217.8568037 | 83.905126   |             |             |

|                 |              |             |                         |
|-----------------|--------------|-------------|-------------------------|
| ANKRD20A11P     | ANKRD20A11P  | 76.13913537 | 8.124730032             |
| 33.03566286     | 72.5920753   |             |                         |
| SEPT7P9 SEPT7P9 | 15.22782708  | 3.046773762 | 1.785711506             |
| 1.885508449     |              |             |                         |
| LMCD1-AS1       | LMCD1-AS1    | 0           | 2.031182508 1.785711506 |
| 0               |              |             |                         |
| LINC00882       | LINC00882    | 0           | 0 5.357134518 0         |
| LINC00883       | LINC00883    | 90.19559114 | 54.84192772             |
| 43.7499319      | 51.85148236  |             |                         |
| SCGB1B2P        | SCGB1B2P     | 1.171371313 | 2.031182508             |
| 8.92855753      | 9.427542247  |             |                         |
| ZNF876P ZNF876P | 29.28428284  | 20.31182508 | 23.21424958             |
| 50.90872813     |              |             |                         |
| RNF217 RNF217   | 16.39919839  | 11.17150379 | 8.92855753              |
| 15.0840676      |              |             |                         |
| LOC101927027    | LOC101927027 | 992.1515025 | 617.4794825             |
| 522.3206155     | 440.2662229  |             |                         |
| LINC00663       | LINC00663    | 16.39919839 | 9.140321286             |
| 122.3212382     | 73.53482953  |             |                         |
| FAM41C FAM41C   | 0 0          | 2.678567259 | 0                       |
| SFTA1P SFTA1P   | 0 0          | 0           | 0.942754225             |
| MIR191 MIR191   | 12.88508445  | 13.2026863  | 12.49998054             |
| 15.0840676      |              |             |                         |
| MIR135A1        | MIR135A1     | 7.028227881 | 2.031182508             |
| 3.571423012     | 2.828262674  |             |                         |
| MIR922 MIR922   | 351.411394   | 360.5348952 | 508.0349235             |
| 375.2161814     |              |             |                         |
| WDR86-AS1       | WDR86-AS1    | 131.1935871 | 19.29623383             |
| 62.49990271     | 50.90872813  |             |                         |
| LOC100128593    | LOC100128593 | 0           | 0 0 3.771016899         |
| FAM181B FAM181B | 0 0          | 2.678567259 | 0                       |
| ODF3L1 ODF3L1   | 1.171371313  | 0           | 0 1.885508449           |
| SMURF2 SMURF2   | 699.3086741  | 407.2520929 | 1156.2482               |
| 911.6433353     |              |             |                         |
| PPP1R2P9        | PPP1R2P9     | 0           | 7.109138778 11.60712479 |
| 0               |              |             |                         |
| FAM86FP FAM86FP | 56.22582305  | 19.29623383 | 72.321316               |
| 50.90872813     |              |             |                         |
| MTMR9LP MTMR9LP | 15.22782708  | 14.21827756 | 22.32139383             |
| 15.0840676      |              |             |                         |
| ZMYND19 ZMYND19 | 1983.131634  | 1961.106712 | 1983.032627             |
| 1674.331503     |              |             |                         |
| WHAMMP2 WHAMMP2 | 2.342742627  | 2.031182508 | 627.6775944             |
| 359.1893596     |              |             |                         |
| PRKCDBP PRKCDBP | 787.1615226  | 1301.987988 | 1581.247539             |
| 1476.353116     |              |             |                         |
| LOC728739       | LOC728739    | 11.71371313 | 15.23386881             |
| 4.464278765     | 22.62610139  |             |                         |
| LOC100272217    | LOC100272217 | 40.99799597 | 38.59246765             |
| 62.49990271     | 39.59567744  |             |                         |

|                 |              |             |             |             |             |
|-----------------|--------------|-------------|-------------|-------------|-------------|
| NIFK-AS1        | NIFK-AS1     | 1306.079015 | 1576.197626 |             |             |
| 1841.961419     | 1797.832307  |             |             |             |             |
| TPM3P9 TPM3P9   | 737.9639275  | 697.7111915 | 733.0345732 |             |             |
| 660.8707115     |              |             |             |             |             |
| CSNK1G2 CSNK1G2 | 5589.783908  | 4605.706337 | 4687.492703 |             |             |
| 4325.356383     |              |             |             |             |             |
| C19orf43        | C19orf43     | 6769.35482  | 8109.496164 |             |             |
| 5568.741332     | 5613.158654  |             |             |             |             |
| DHX38 DHX38     | 7251.959802  | 6876.568381 | 5996.419237 |             |             |
| 6541.771565     |              |             |             |             |             |
| ZNF287 ZNF287   | 354.925508   | 496.6241232 | 875.8914937 |             |             |
| 931.441174      |              |             |             |             |             |
| PELI1 PELI1     | 6048.961463  | 5264.825061 | 4806.242519 |             |             |
| 5786.625431     |              |             |             |             |             |
| UFC1 UFC1       | 4897.503462  | 5826.447024 | 4083.029359 |             |             |
| 4190.542529     |              |             |             |             |             |
| ACRBP ACRBP     | 7.028227881  | 5.07795627  | 30.3570956  |             |             |
| 19.79783872     |              |             |             |             |             |
| CNFN CNFN       | 2.342742627  | 7.109138778 | 0           | 5.656525348 |             |
| KSR1 KSR1       | 420.5223015  | 98.51235164 | 122.3212382 |             |             |
| 284.7117759     |              |             |             |             |             |
| AP1G2 AP1G2     | 9001.988544  | 9256.098689 | 7226.774465 |             |             |
| 9017.444159     |              |             |             |             |             |
| ACAT2 ACAT2     | 9434.224559  | 11654.92523 | 7150.881726 |             |             |
| 8516.841666     |              |             |             |             |             |
| GAS5-AS1        | GAS5-AS1     | 186.2480388 | 139.1360018 |             |             |
| 573.2133934     | 324.3074533  |             |             |             |             |
| MIRLET7F2       | MIRLET7F2    | 0           | 0           | 0.892855753 | 0           |
| MIRLET7F1       | MIRLET7F1    | 0           | 0           | 0           | 3.771016899 |
| LYPLAL1-AS1     | LYPLAL1-AS1  | 8.199599194 | 13.2026863  |             |             |
| 11.60712479     | 14.14131337  |             |             |             |             |
| LOC644838       | LOC644838    | 2.342742627 | 0           | 0           | 0           |
| MIR499B MIR499B | 1.171371313  | 0           | 0           | 0           |             |
| MIR4755 MIR4755 | 11.71371313  | 11.17150379 | 7.142846024 |             |             |
| 14.14131337     |              |             |             |             |             |
| LINC00645       | LINC00645    | 0           | 0           | 8.035701777 |             |
| 0.942754225     |              |             |             |             |             |
| LPAL2 LPAL2     | 4.685485254  | 11.17150379 | 0           | 2.828262674 |             |
| NBEAP1 NBEAP1   | 1.171371313  | 1.015591254 | 2.678567259 |             |             |
| 4.713771124     |              |             |             |             |             |
| LOC100507387    | LOC100507387 | 0           | 0           | 6.249990271 |             |
| 6.599279573     |              |             |             |             |             |
| LOC339975       | LOC339975    | 53.88308042 | 0           | 0.892855753 |             |
| 113.130507      |              |             |             |             |             |
| MIR4321 MIR4321 | 9.370970508  | 3.046773762 | 3.571423012 | 0           |             |
| MIR4312 MIR4312 | 0            | 1.015591254 | 5.357134518 | 0           |             |
| MIR4322 MIR4322 | 0            | 0           | 0.942754225 |             |             |
| GSTTP2 GSTTP2   | 0            | 0           | 16.07140355 | 0.942754225 |             |
| LINC01005       | LINC01005    | 0           | 0           | 0           | 4.713771124 |
| LOC729506       | LOC729506    | 21.08468364 | 22.34300759 |             |             |

|                 |               |               |               |   |  |
|-----------------|---------------|---------------|---------------|---|--|
| 29.46423985     | 19.79783872   |               |               |   |  |
| FMNL1 FMNL1     | 6853.693555   | 4369.073575   | 2590.17454    |   |  |
| 3559.839953     |               |               |               |   |  |
| SDF2L1 SDF2L1   | 3852.64025    | 5800.041652   | 3485.70886    |   |  |
| 2739.643777     |               |               |               |   |  |
| ZFAND3 ZFAND3   | 384.2097908   | 161.4790094   | 217.8568037   |   |  |
| 188.5508449     |               |               |               |   |  |
| CALB1 CALB1     | 1.171371313   | 4.062365016   | 8.035701777   | 0 |  |
| RNF167 RNF167   | 3044.394044   | 2367.343213   | 1006.248434   |   |  |
| 1352.852312     |               |               |               |   |  |
| GALNT3 GALNT3   | 614.9699396   | 448.8913343   | 48.21421066   |   |  |
| 266.7994456     |               |               |               |   |  |
| FOXA1 FOXA1     | 4.685485254   | 89.37203036   | 8.92855753    |   |  |
| 0.942754225     |               |               |               |   |  |
| SMPDL3A SMPDL3A | 43.3407386    | 9.140321286   | 8.035701777   |   |  |
| 25.45436407     |               |               |               |   |  |
| BMP15 BMP15     | 0 2.031182508 | 0             | 0             |   |  |
| TAF10 TAF10     | 4432.46905    | 4053.224695   | 3599.10154    |   |  |
| 3425.026098     |               |               |               |   |  |
| OSTM1 OSTM1     | 2451.680159   | 3081.303865   | 4745.528327   |   |  |
| 3680.512493     |               |               |               |   |  |
| FADS1 FADS1     | 87.85284851   | 81.24730032   | 181.2497179   |   |  |
| 135.7566084     |               |               |               |   |  |
| SHD SHD         | 1.171371313   | 1.015591254   | 0 0.942754225 |   |  |
| KATNBL1 KATNBL1 | 1807.425937   | 1736.661044   | 1275.890871   |   |  |
| 1588.540869     |               |               |               |   |  |
| ADAMTS7P1       | ADAMTS7P1     | 0 0           | 0.892855753   | 0 |  |
| SSR3 SSR3       | 9476.393926   | 7778.413415   | 8122.308785   |   |  |
| 5334.103403     |               |               |               |   |  |
| CXXC5 CXXC5     | 80.82462063   | 59.91988399   | 186.6068524   |   |  |
| 176.29504       |               |               |               |   |  |
| HBEGF HBEGF     | 144.0786716   | 308.7397412   | 183.0354294   |   |  |
| 188.5508449     |               |               |               |   |  |
| CRYM CRYM       | 0 0           | 2.678567259   | 0             |   |  |
| CRYBB1 CRYBB1   | 14.05645576   | 15.23386881   | 2.678567259   | 0 |  |
| STOX2 STOX2     | 1.171371313   | 0 12.49998054 | 0             |   |  |
| TRIM63 TRIM63   | 0 0           | 10.71426904   | 0             |   |  |
| IFNG-AS1        | IFNG-AS1      | 11.71371313   | 1.015591254   |   |  |
| 5.357134518     | 20.74059294   |               |               |   |  |
| HIST2H2AC       | HIST2H2AC     | 278.7863726   | 233.5859884   |   |  |
| 168.7497373     | 131.0428372   |               |               |   |  |
| HIST1H2AM       | HIST1H2AM     | 276.44363     | 304.6773762   |   |  |
| 97.32127708     | 132.9283457   |               |               |   |  |
| TFDP1 TFDP1     | 14240.36106   | 16697.33581   | 6261.597396   |   |  |
| 8188.763196     |               |               |               |   |  |
| LINC00865       | LINC00865     | 64.42542224   | 22.34300759   |   |  |
| 78.57130627     | 103.7029647   |               |               |   |  |
| ANKRD20A9P      | ANKRD20A9P    | 5.856856567   | 0 13.3928363  |   |  |
| 48.08046546     |               |               |               |   |  |
| MIR2116 MIR2116 | 1.171371313   | 0 0.892855753 | 0.942754225   |   |  |

|               |               |               |               |   |
|---------------|---------------|---------------|---------------|---|
| SND1-IT1      | SND1-IT1      | 52.71170911   | 48.74838019   |   |
| 74.99988325   | 100.874702    |               |               |   |
| DNPH1 DNPH1   | 3850.297507   | 5293.261616   | 4010.708043   |   |
| 3965.224269   |               |               |               |   |
| CRTC2 CRTC2   | 3525.827654   | 3368.71619    | 3922.315323   |   |
| 2956.477249   |               |               |               |   |
| ACOT2 ACOT2   | 1347.07701    | 2018.995413   | 978.5699053   |   |
| 1216.15295    |               |               |               |   |
| PLGLB2 PLGLB2 | 55.05445173   | 50.7795627    | 74.99988325   |   |
| 105.5884732   |               |               |               |   |
| SNRNP200      | SNRNP200      | 26427.3082    | 18790.46938   |   |
| 20905.3246    | 19583.83351   |               |               |   |
| PRKAA2 PRKAA2 | 0 0           | 15.1785478    | 0             |   |
| VRK1 VRK1     | 5677.636756   | 6954.768908   | 3834.815459   |   |
| 4189.599775   |               |               |               |   |
| TTLL4 TTLL4   | 1789.855367   | 2440.465783   | 1409.819234   |   |
| 1641.335105   |               |               |               |   |
| CHAF1A CHAF1A | 5719.806124   | 5612.15727    | 1763.390112   |   |
| 2760.38437    |               |               |               |   |
| EGLN1 EGLN1   | 2955.369824   | 2944.199045   | 3316.066267   |   |
| 3489.133386   |               |               |               |   |
| DNAH12 DNAH12 | 0 3.046773762 | 10.71426904   | 0             |   |
| IGSF22 IGSF22 | 8.199599194   | 7.109138778   | 85.71415229   |   |
| 81.07686333   |               |               |               |   |
| LINC01105     | LINC01105     | 0 0           | 0.892855753   | 0 |
| ZNF788 ZNF788 | 377.1815629   | 380.8467203   | 192.8568427   |   |
| 230.9747851   |               |               |               |   |
| LOC283922     | LOC283922     | 364.2964785   | 203.1182508   |   |
| 549.1062881   | 377.1016899   |               |               |   |
| LINC00282     | LINC00282     | 0 0           | 99.10698859   |   |
| 21.68334717   |               |               |               |   |
| LINC01347     | LINC01347     | 91.36696245   | 46.71719769   |   |
| 102.6784116   | 82.01961755   |               |               |   |
| RNF150 RNF150 | 0 0           | 0 0.942754225 |               |   |
| PYY PYY       | 1.171371313   | 0 0 0         |               |   |
| LOC101928896  | LOC101928896  | 7.028227881   | 11.17150379   |   |
| 12.49998054   | 39.59567744   |               |               |   |
| LOC101928865  | LOC101928865  | 9.370970508   | 6.093547524   |   |
| 36.60708587   | 5.656525348   |               |               |   |
| KRT18P55      | KRT18P55      | 0 1.015591254 | 0 0           |   |
| LINC01446     | LINC01446     | 1.171371313   | 0 0.892855753 |   |
| 23.56885562   |               |               |               |   |
| LINC00640     | LINC00640     | 0 0           | 5.357134518   | 0 |
| NBPF11 NBPF11 | 50.36896648   | 32.49892013   | 58.9284797    |   |
| 67.87830418   |               |               |               |   |
| NAPSB NAPSB   | 33.96976809   | 11.17150379   | 79.46416202   |   |
| 30.16813519   |               |               |               |   |
| FAM13A-AS1    | FAM13A-AS1    | 16.39919839   | 137.1048193   |   |
| 651.7846997   | 86.73338867   |               |               |   |
| PNMA1 PNMA1   | 3712.075692   | 5104.361643   | 4589.278571   |   |

|              |              |             |             |             |             |
|--------------|--------------|-------------|-------------|-------------|-------------|
| 4286.70346   |              |             |             |             |             |
| CGRRF1       | CGRRF1       | 569.2864583 | 620.5262562 | 989.2841744 |             |
| 757.9743967  |              |             |             |             |             |
| ANKRD35      | ANKRD35      | 146.4214142 | 121.8709505 | 92.85699832 |             |
| 140.4703795  |              |             |             |             |             |
| TUSC3        | TUSC3        | 18.74194102 | 0           | 15.1785478  | 19.79783872 |
| SCARNA10     | SCARNA10     |             | 3.51411394  | 3.046773762 |             |
| 33.92851862  | 8.484788022  |             |             |             |             |
| MED15P9      | MED15P9      | 0           | 1.015591254 | 3.571423012 | 0           |
| NPY6R        | NPY6R        | 1.171371313 | 2.031182508 | 0           | 0           |
| SNHG6        | SNHG6        | 1217.054795 | 858.1746097 | 4748.206895 |             |
| 2789.609751  |              |             |             |             |             |
| CCT8         | CCT8         | 22258.3977  | 26687.70697 | 17428.5443  |             |
| 20581.26748  |              |             |             |             |             |
| APBB1IP      | APBB1IP      | 3911.208816 | 2167.271736 | 3741.065605 |             |
| 3188.394788  |              |             |             |             |             |
| PUS7         | PUS7         | 1466.556884 | 1527.449246 | 1274.998015 |             |
| 1536.689386  |              |             |             |             |             |
| RHOF         | RHOF         | 7697.080901 | 8143.010675 | 5260.706097 |             |
| 7443.044604  |              |             |             |             |             |
| CCDC184      | CCDC184      | 0           | 4.062365016 | 33.03566286 | 23.56885562 |
| SUM04        | SUM04        | 38.65525334 | 45.70160643 | 49.10706642 |             |
| 48.08046546  |              |             |             |             |             |
| GOLGA6L10    | GOLGA6L10    |             | 0           | 0           | 3.571423012 |
| QRFPR        | QRFPR        | 0           | 0           | 5.656525348 | 0           |
| MRPL16       | MRPL16       | 5531.215342 | 7762.163955 | 4444.635939 |             |
| 4618.552947  |              |             |             |             |             |
| SRGAP1       | SRGAP1       | 3.51411394  | 6.093547524 | 28.5713841  |             |
| 19.79783872  |              |             |             |             |             |
| ZNF629       | ZNF629       | 10.54234182 | 9.140321286 | 527.67775   |             |
| 379.9299526  |              |             |             |             |             |
| C3orf14      | C3orf14      | 1092.889435 | 1141.52457  | 625.8918829 |             |
| 527.9423658  |              |             |             |             |             |
| POLR3A       | POLR3A       | 3546.912337 | 3344.342    | 2599.995953 |             |
| 3091.291103  |              |             |             |             |             |
| UPK1A-AS1    | UPK1A-AS1    |             | 0           | 1.015591254 | 24.10710533 |
| 4.713771124  |              |             |             |             |             |
| PPP2R3C      | PPP2R3C      | 4061.144344 | 3817.607524 | 2971.423946 |             |
| 3464.621776  |              |             |             |             |             |
| ZSCAN23      | ZSCAN23      | 18.74194102 | 9.140321286 | 44.64278765 |             |
| 14.14131337  |              |             |             |             |             |
| WDR82        | WDR82        | 9836.004919 | 5689.342205 | 10329.44821 |             |
| 8272.668322  |              |             |             |             |             |
| ULBP2        | ULBP2        | 36.31251072 | 26.40537261 | 134.8212187 |             |
| 41.48118589  |              |             |             |             |             |
| WNT10A       | WNT10A       | 14.05645576 | 10.15591254 | 665.177536  |             |
| 550.5684672  |              |             |             |             |             |
| LOC102724094 | LOC102724094 |             | 100.737933  | 124.9177242 |             |
| 23.21424958  | 21.68334717  |             |             |             |             |
| LINC01393    | LINC01393    |             | 8.199599194 | 13.2026863  |             |

|                 |              |             |             |             |
|-----------------|--------------|-------------|-------------|-------------|
| 34.82137437     | 17.91233027  |             |             |             |
| LINC01476       | LINC01476    | 1.171371313 | 1.015591254 | 0           |
| 0               |              |             |             |             |
| SLC35E4 SLC35E4 | 728.592957   | 1068.401999 | 336.6066189 |             |
| 390.300249      |              |             |             |             |
| C16orf87        | C16orf87     | 2220.92001  | 1848.376082 |             |
| 703.5703334     | 1333.997228  |             |             |             |
| CFAP44-AS1      | CFAP44-AS1   | 12.88508445 | 1.015591254 |             |
| 18.74997081     | 9.427542247  |             |             |             |
| SLC2A1-AS1      | SLC2A1-AS1   | 79.65324932 | 48.74838019 |             |
| 71.42846024     | 24.51160984  |             |             |             |
| MIR4670 MIR4670 | 0            | 1.015591254 | 0           | 0           |
| CCDC11 CCDC11   | 15.22782708  | 15.23386881 | 34.82137437 |             |
| 24.51160984     |              |             |             |             |
| SMU1 SMU1       | 6371.088574  | 6702.902277 | 6742.846647 |             |
| 6020.428479     |              |             |             |             |
| ULBP3 ULBP3     | 2.342742627  | 15.23386881 | 1.785711506 |             |
| 10.37029647     |              |             |             |             |
| PAGR1 PAGR1     | 4200.53753   | 5248.575601 | 4178.564924 |             |
| 3851.151008     |              |             |             |             |
| ZNF428 ZNF428   | 658.3106782  | 538.2633646 | 538.3920191 |             |
| 445.9227483     |              |             |             |             |
| KIF6 KIF6       | 30.45565415  | 2.031182508 | 7.142846024 |             |
| 4.713771124     |              |             |             |             |
| HIST1H2BK       | HIST1H2BK    | 814.1030629 | 1506.12183  |             |
| 986.6056071     | 711.7794397  |             |             |             |
| C19orf18        | C19orf18     | 2.342742627 | 4.062365016 |             |
| 10.71426904     | 15.0840676   |             |             |             |
| LOC100506675    | LOC100506675 | 1.171371313 | 0           | 3.571423012 |
| 0               |              |             |             |             |
| MIR1184-2       | MIR1184-2    | 391.2380187 | 470.2187506 |             |
| 505.3563562     | 631.6453306  |             |             |             |
| USP12 USP12     | 3862.01122   | 2705.535101 | 2610.710222 |             |
| 3532.50008      |              |             |             |             |
| LINC00664       | LINC00664    | 2.342742627 | 2.031182508 |             |
| 43.7499319      | 0            |             |             |             |
| LOC100506990    | LOC100506990 | 78.481878   | 73.12257029 |             |
| 588.3919412     | 588.2786362  |             |             |             |
| ENTPD3-AS1      | ENTPD3-AS1   | 69.11090749 | 157.4166444 |             |
| 189.2854196     | 160.2682182  |             |             |             |
| HLA-DRB4        | HLA-DRB4     | 240.1311193 | 314.8332888 |             |
| 103.5712674     | 148.0124133  |             |             |             |
| DAO DAO         | 0            | 0           | 0.942754225 |             |
| SCAF1 SCAF1     | 343.2117948  | 152.3386881 | 197.3211214 |             |
| 164.0392351     |              |             |             |             |
| IZUM01 IZUM01   | 0            | 0           | 12.49998054 | 0           |
| ZBED3 ZBED3     | 7.028227881  | 19.29623383 | 179.4640064 |             |
| 53.73699081     |              |             |             |             |
| LOC100288778    | LOC100288778 | 98.39519033 | 57.88870148 |             |
| 91.07128681     | 87.6761429   |             |             |             |

|             |             |             |             |             |             |   |
|-------------|-------------|-------------|-------------|-------------|-------------|---|
| C2orf66     | C2orf66     | 4.685485254 | 0           | 3.571423012 | 0           |   |
| CCDC85C     | CCDC85C     | 243.6452332 | 250.8510398 |             | 429.4636172 |   |
| 475.1481293 |             |             |             |             |             |   |
| AC0T6       | AC0T6       | 4.685485254 | 2.031182508 |             | 1.785711506 | 0 |
| LAMP1       | LAMP1       | 2691.811278 | 730.2101117 |             | 1068.748336 |   |
| 955.9527839 |             |             |             |             |             |   |
| MRGPRD      | MRGPRD      | 5.856856567 | 1.015591254 |             | 0           | 0 |
| ABCA5       | ABCA5       | 292.8428284 | 198.0402945 |             | 332.1423401 |   |
| 340.3342751 |             |             |             |             |             |   |
| OR2T8       | OR2T8       | 1.171371313 | 0           | 0           | 0           |   |
| MPEG1       | MPEG1       | 0           | 0           | 20.74059294 |             |   |
| CNIH1       | CNIH1       | 3231.813454 | 3317.936627 |             | 2762.4957   |   |
| 2709.475642 |             |             |             |             |             |   |
| LOC145783   | LOC145783   |             | 72.62502143 |             | 89.37203036 |   |
| 187.4997081 | 159.325464  |             |             |             |             |   |
| BREA2       | BREA2       | 0           | 9.140321286 | 4.464278765 | 7.542033798 |   |
| ZFPM1       | ZFPM1       | 126.5081019 | 34.53010264 |             | 38.39279738 |   |
| 60.33627038 |             |             |             |             |             |   |
| GANC        | GANC        | 795.3611218 | 1044.027809 |             | 861.6058017 |   |
| 840.9367684 |             |             |             |             |             |   |
| CHODL-AS1   | CHODL-AS1   |             | 1.171371313 |             | 0           | 0 |
| CHMP6       | CHMP6       | 2512.591467 | 3693.705391 |             | 1755.35441  | 0 |
| 1819.515654 |             |             |             |             |             |   |
| ARMC7       | ARMC7       | 438.0928712 | 303.661785  |             | 322.3209268 |   |
| 337.5060124 |             |             |             |             |             |   |
| AREL1       | AREL1       | 4789.737301 | 3989.242446 |             | 3815.172633 |   |
| 3725.764696 |             |             |             |             |             |   |
| OMA1        | OMA1        | 1931.591296 | 1637.133102 |             | 1742.85443  |   |
| 2047.662176 |             |             |             |             |             |   |
| IL21R-AS1   | IL21R-AS1   |             | 5635.467389 |             | 4190.329514 |   |
| 4058.922253 | 5507.570181 |             |             |             |             |   |
| BVES-AS1    | BVES-AS1    |             | 3.51411394  |             | 0           | 0 |
| KCND1       | KCND1       | 40.99799597 | 15.23386881 |             | 42.85707615 | 0 |
| 13.19855915 |             |             |             |             |             |   |
| CD2BP2      | CD2BP2      | 5286.398738 | 4834.214369 |             | 4335.707537 |   |
| 4460.170237 |             |             |             |             |             |   |
| LIX1L       | LIX1L       | 2410.682163 | 1241.052512 |             | 1773.211526 |   |
| 2038.234634 |             |             |             |             |             |   |
| SPATA2L     | SPATA2L     | 413.4940737 | 451.9381081 |             | 560.7134129 |   |
| 432.7241891 |             |             |             |             |             |   |
| ADAM1A      | ADAM1A      | 49.19759517 | 24.3741901  |             | 113.3926806 |   |
| 87.6761429  |             |             |             |             |             |   |
| MIR4799     | MIR4799     | 0           | 1.015591254 |             | 0           | 0 |
| MIR4797     | MIR4797     | 1.171371313 | 0           | 0           | 0           |   |
| MIR4793     | MIR4793     | 10.54234182 | 4.062365016 |             | 7.142846024 |   |
| 2.828262674 |             |             |             |             |             |   |
| MIR4792     | MIR4792     | 0           | 0           | 0.892855753 | 0           |   |
| MIR4787     | MIR4787     | 9.370970508 | 12.18709505 |             | 9.821413283 |   |
| 10.37029647 |             |             |             |             |             |   |
| MIR4786     | MIR4786     | 3.51411394  | 0           | 0           | 0           |   |



|              |              |             |             |             |
|--------------|--------------|-------------|-------------|-------------|
| MIR2467      | MIR2467      | 1.171371313 | 1.015591254 | 3.571423012 |
| 4.713771124  |              |             |             |             |
| MIR4785      | MIR4785      | 22.25605496 | 32.49892013 | 35.71423012 |
| 30.16813519  |              |             |             |             |
| MIR4784      | MIR4784      | 30.45565415 | 18.28064257 | 52.67848943 |
| 62.22177883  |              |             |             |             |
| MIR4782      | MIR4782      | 0           | 0           | 0.942754225 |
| MIR4781      | MIR4781      | 0           | 0.892855753 | 0.942754225 |
| MIR4775      | MIR4775      | 16.39919839 | 10.15591254 | 13.3928363  |
| 10.37029647  |              |             |             |             |
| MIR4774      | MIR4774      | 1.171371313 | 0           | 0           |
| TTC7B        | TTC7B        | 200.3044946 | 203.1182508 | 111.6069691 |
| 169.6957604  |              |             |             |             |
| MIR4482      | MIR4482      | 30.45565415 | 8.124730032 | 49.99992217 |
| 12.25580492  |              |             |             |             |
| LOC100288637 | LOC100288637 |             | 557.5727452 | 326.0047926 |
| 163.3926028  | 205.520421   |             |             |             |
| ZNF552       | ZNF552       | 502.5182935 | 543.3413209 | 492.8563757 |
| 574.1373229  |              |             |             |             |
| RPS14P3      | RPS14P3      | 28.11291152 | 20.31182508 | 38.39279738 |
| 22.62610139  |              |             |             |             |
| MIR3658      | MIR3658      | 598.5707412 | 822.6289158 | 341.0708977 |
| 492.1177053  |              |             |             |             |
| MIR3656      | MIR3656      | 798.8752358 | 1206.52241  | 1185.71244  |
| 1027.602105  |              |             |             |             |
| MIR3655      | MIR3655      | 798.8752358 | 1211.600366 | 1158.926767 |
| 972.9223599  |              |             |             |             |
| MIR3653      | MIR3653      | 12.88508445 | 5.07795627  | 2.678567259 |
| 2.828262674  |              |             |             |             |
| SPON1        | SPON1        | 30.45565415 | 16.24946006 | 199.9996887 |
| 488.3466884  |              |             |             |             |
| CXCR1        | CXCR1        | 38.65525334 | 143.1983668 | 0           |
| PRKD1        | PRKD1        | 0           | 0           | 3.771016899 |
| C9orf139     | C9orf139     |             | 241.3024906 | 42.65483267 |
| 51.78563368  | 111.2449985  |             |             |             |
| LOC101928105 | LOC101928105 |             | 16.39919839 | 17.26505132 |
| 4.464278765  | 16.02682182  |             |             |             |
| RAX2         | RAX2         | 0           | 1.015591254 | 0           |
| CHST6        | CHST6        | 0           | 0           | 0.892855753 |
| CRY2         | CRY2         | 1116.316862 | 1533.542794 | 3949.100996 |
| 2576.547296  |              |             |             |             |
| CRYM-AS1     | CRYM-AS1     |             | 0           | 0           |
| RPL23P8      | RPL23P8      | 1.171371313 | 0           | 0.892855753 |
| VPS13A-AS1   | VPS13A-AS1   |             | 64.42542224 | 53.82633646 |
| 87.4998638   | 82.96237177  |             |             |             |
| RPS10P7      | RPS10P7      | 16.39919839 | 9.140321286 | 24.99996108 |
| 11.3130507   |              |             |             |             |
| PTCD3        | PTCD3        | 6526.880959 | 7407.722607 | 6782.1323   |
| 7604.255577  |              |             |             |             |
| HGH1         | HGH1         | 138.221815  | 227.4924409 | 115.1783921 |

|                 |             |  |               |   |             |
|-----------------|-------------|--|---------------|---|-------------|
| 175.3522858     |             |  |               |   |             |
| LINC01222       | LINC01222   |  | 2.342742627   | 0 | 0 0         |
| RPL19P12        | RPL19P12    |  | 8.199599194   | 0 | 8.92855753  |
| 13.19855915     |             |  |               |   |             |
| LOC652276       | LOC652276   |  | 238.9597479   |   | 154.3698706 |
| 242.8567648     | 222.489997  |  |               |   |             |
| LOC153684       | LOC153684   |  | 301.0424276   |   | 256.9445873 |
| 754.4631113     | 473.2626208 |  |               |   |             |
| FICD FICD       | 400.6089892 |  | 676.3837752   |   | 707.1417564 |
| 570.366306      |             |  |               |   |             |
| ZNF429 ZNF429   | 277.6150013 |  | 425.5327354   |   | 1988.389762 |
| 682.5540587     |             |  |               |   |             |
| TTC38 TTC38     | 1061.26241  |  | 1948.919617   |   | 1124.998249 |
| 942.7542247     |             |  |               |   |             |
| FGL2 FGL2       | 203.8186085 |  | 277.2564124   |   | 149.1069108 |
| 94.27542247     |             |  |               |   |             |
| KLHL28 KLHL28   | 1345.905639 |  | 1336.51809    |   | 2676.781548 |
| 2655.738651     |             |  |               |   |             |
| WNK4 WNK4       | 7.028227881 |  | 5.07795627    |   | 47.32135491 |
| 37.71016899     |             |  |               |   |             |
| TNKS2 TNKS2     | 4867.047807 |  | 3263.094699   |   | 6160.704696 |
| 6046.825597     |             |  |               |   |             |
| RUFY4 RUFY4     | 33.96976809 |  | 12.18709505   |   | 63.39275847 |
| 66.93554995     |             |  |               |   |             |
| FAM226A FAM226A | 1.171371313 |  | 0 0           |   | 0.942754225 |
| FAM226B FAM226B | 1.171371313 |  | 0 0           |   | 0.942754225 |
| ZNF32 ZNF32     | 504.8610361 |  | 722.0853816   |   | 1583.926106 |
| 1415.074091     |             |  |               |   |             |
| C11orf42        | C11orf42    |  | 0 4.062365016 |   | 0           |
| 0.942754225     |             |  |               |   |             |
| CLVS1 CLVS1     | 24.59879758 |  | 3.046773762   |   | 15.1785478  |
| 27.33987252     |             |  |               |   |             |
| MIR330 MIR330   | 1.171371313 |  | 1.015591254   |   | 2.678567259 |
| 2.828262674     |             |  |               |   |             |
| UQCRHL UQCRHL   | 402.9517318 |  | 627.635395    |   | 293.7495427 |
| 271.5132167     |             |  |               |   |             |
| DLGAP3 DLGAP3   | 4.685485254 |  | 12.18709505   |   | 39.28565313 |
| 6.599279573     |             |  |               |   |             |
| FKBP15 FKBP15   | 3010.424276 |  | 3056.929675   |   | 2142.853807 |
| 2702.876362     |             |  |               |   |             |
| FOXL2 FOXL2     | 0 0         |  | 0 0.942754225 |   |             |
| KLF13 KLF13     | 2291.202289 |  | 1299.956805   |   | 1327.676505 |
| 1470.696591     |             |  |               |   |             |
| ATP6V1D ATP6V1D | 3124.047293 |  | 3027.477528   |   | 2217.853691 |
| 2793.380768     |             |  |               |   |             |
| COL18A1 COL18A1 | 857.4438015 |  | 210.2273896   |   | 91.07128681 |
| 536.4271539     |             |  |               |   |             |
| SEPSECS-AS1     | SEPSECS-AS1 |  | 105.4234182   |   | 74.13816155 |
| 118.7498152     | 87.6761429  |  |               |   |             |
| KIF13B KIF13B   | 691.1090749 |  | 369.6752165   |   | 616.0704696 |

|              |              |             |             |             |             |
|--------------|--------------|-------------|-------------|-------------|-------------|
| 499.6597391  |              |             |             |             |             |
| IL22         | IL22         | 454.4920696 | 249.8354485 | 21.42853807 |             |
| 937.0976994  |              |             |             |             |             |
| PDCD2L       | PDCD2L       | 693.4518176 | 957.7025526 | 831.2487061 |             |
| 701.4091432  |              |             |             |             |             |
| PLXNA1       | PLXNA1       | 327.9839678 | 318.8956538 | 463.3921358 |             |
| 461.9495701  |              |             |             |             |             |
| HGSNAT       | HGSNAT       | 707.5082733 | 594.1208836 | 1254.462333 |             |
| 1391.505236  |              |             |             |             |             |
| NRIP2        | NRIP2        | 77.31050669 | 60.93547524 | 156.2497568 |             |
| 154.6116929  |              |             |             |             |             |
| IFI27L2      | IFI27L2      | 2070.984482 | 1852.438447 | 957.1413672 |             |
| 1174.671764  |              |             |             |             |             |
| PGK2         | PGK2         | 0           | 1.015591254 | 0.892855753 | 0           |
| MT1E         | MT1E         | 3025.652103 | 2259.69054  | 998.2127319 |             |
| 1281.202991  |              |             |             |             |             |
| SIX4         | SIX4         | 5.856856567 | 5.07795627  | 0           | 0.942754225 |
| PHOX2A       | PHOX2A       | 15.22782708 | 3.046773762 | 4.464278765 |             |
| 3.771016899  |              |             |             |             |             |
| PPM1J        | PPM1J        | 5.856856567 | 10.15591254 | 27.67852834 |             |
| 18.85508449  |              |             |             |             |             |
| ALDOC        | ALDOC        | 1473.585112 | 1933.685748 | 3745.529884 |             |
| 3417.484065  |              |             |             |             |             |
| LOC100131257 | LOC100131257 |             | 2.342742627 | 0           | 0           |
| LOC440600    | LOC440600    |             | 62.08267961 | 74.13816155 | 0           |
| 65.17846997  |              | 33.93915209 |             |             |             |
| SMA5         | SMA5         | 101.9093043 | 100.5435342 | 112.4998249 |             |
| 89.56165135  |              |             |             |             |             |
| LOC400958    | LOC400958    |             | 2.342742627 | 12.18709505 |             |
| 2.678567259  |              | 0           |             |             |             |
| LPP-AS2      | LPP-AS2      | 16.39919839 | 30.46773762 | 92.85699832 |             |
| 32.05364364  |              |             |             |             |             |
| MIR367       | MIR367       | 0           | 3.046773762 | 1.785711506 | 4.713771124 |
| MIR302D      | MIR302D      | 0           | 1.015591254 | 1.785711506 | 3.771016899 |
| MIR302C      | MIR302C      | 0           | 2.031182508 | 5.357134518 | 0           |
| EEFSEC       | EEFSEC       | 1512.240366 | 1661.507292 | 1083.926884 |             |
| 1513.120531  |              |             |             |             |             |
| TRIM35       | TRIM35       | 1391.58912  | 1839.235761 | 2241.06794  |             |
| 1845.912772  |              |             |             |             |             |
| MIR4453      | MIR4453      | 23.42742627 | 14.21827756 | 13.3928363  |             |
| 11.3130507   |              |             |             |             |             |
| MIR760       | MIR760       | 2.342742627 | 2.031182508 | 1.785711506 |             |
| 1.885508449  |              |             |             |             |             |
| SMG1P2       | SMG1P2       | 393.5807613 | 317.8800625 | 938.3913964 |             |
| 807.9403706  |              |             |             |             |             |
| SNORA23      | SNORA23      | 2.342742627 | 5.07795627  | 4.464278765 |             |
| 4.713771124  |              |             |             |             |             |
| SMG1P5       | SMG1P5       | 169.8488405 | 153.3542794 | 383.0351181 |             |
| 312.0516484  |              |             |             |             |             |
| SNORD68      | SNORD68      | 89.02421982 | 96.48116913 | 124.9998054 |             |

|             |             |             |             |             |             |
|-------------|-------------|-------------|-------------|-------------|-------------|
| 130.100083  |             |             |             |             |             |
| SNORA65     | SNORA65     | 8.199599194 | 5.07795627  | 10.71426904 |             |
| 10.37029647 |             |             |             |             |             |
| SNORD36A    | SNORD36A    |             | 50.36896648 | 40.62365016 |             |
| 27.67852834 | 73.53482953 |             |             |             |             |
| SNORD24     | SNORD24     | 8.199599194 | 7.109138778 | 15.1785478  |             |
| 8.484788022 |             |             |             |             |             |
| MIR3115     | MIR3115     | 2.342742627 | 1.015591254 | 0           | 4.713771124 |
| MIR2909     | MIR2909     | 0           | 0           | 0           | 0           |
| MIR1972-1   | MIR1972-1   |             | 4.685485254 | 0           | 0           |
| KIF9-AS1    | KIF9-AS1    |             | 60.9113083  | 54.84192772 | 0           |
| 98.21413283 | 82.01961755 |             |             |             |             |
| LINC01115   | LINC01115   |             | 4.685485254 | 4.062365016 |             |
| 5.357134518 | 11.3130507  |             |             |             |             |
| KANSL1-AS1  | KANSL1-AS1  |             | 0           | 0           | 6.249990271 |
| 1.885508449 |             |             |             |             |             |
| LOC643542   | LOC643542   |             | 0           | 2.031182508 | 35.71423012 |
| 12.25580492 |             |             |             |             |             |
| LOC389641   | LOC389641   |             | 154.6210134 | 66.01343151 |             |
| 174.1068718 | 207.4059294 |             |             |             |             |
| MIR181A2HG  | MIR181A2HG  |             | 9.370970508 | 0           | 13.3928363  |
| 6.599279573 |             |             |             |             |             |
| FLJ39080    | FLJ39080    |             | 0           | 0           | 0.892855753 |
| MIR1-2      | MIR1-2      | 1.171371313 | 1.015591254 | 0           | 0           |
| DIRC3       | DIRC3       | 14.05645576 | 4.062365016 | 51.78563368 |             |
| 61.27902461 |             |             |             |             |             |
| MIR140      | MIR140      | 1.171371313 | 0           | 0           | 0           |
| LOC339529   | LOC339529   |             | 0           | 1.015591254 | 7.142846024 |
| 1.885508449 |             |             |             |             |             |
| LOC283177   | LOC283177   |             | 0           | 0           | 2.678567259 |
| INE1        | INE1        | 45.68348122 | 27.42096386 | 114.2855364 | 0           |
| 45.25220279 |             |             |             |             |             |
| MIR425      | MIR425      | 22.25605496 | 20.31182508 | 18.74997081 |             |
| 36.76741476 |             |             |             |             |             |
| ATXN80S     | ATXN80S     | 0           | 0           | 0.892855753 | 0           |
| SNORD2      | SNORD2      | 55.05445173 | 62.96665775 | 103.5712674 |             |
| 77.30584643 |             |             |             |             |             |
| TCL6        | TCL6        | 11.71371313 | 0           | 14.28569205 | 4.713771124 |
| GABARAPL3   | GABARAPL3   |             | 1.171371313 | 0           | 2.678567259 |
| 0           |             |             |             |             |             |
| MGC45922    | MGC45922    |             | 21.08468364 | 31.48332888 |             |
| 24.10710533 | 15.0840676  |             |             |             |             |
| SPATA41     | SPATA41     | 18.74194102 | 16.24946006 | 42.85707615 |             |
| 35.82466054 |             |             |             |             |             |
| MIR572      | MIR572      | 0           | 0           | 0.942754225 |             |
| MIR570      | MIR570      | 48.02622385 | 39.60805891 | 48.21421066 |             |
| 48.08046546 |             |             |             |             |             |
| MIR569      | MIR569      | 0           | 0           | 0.892855753 | 0           |
| LOC643339   | LOC643339   |             | 0           | 1.015591254 | 2.678567259 |
| 1.885508449 |             |             |             |             |             |

|                 |               |             |             |               |
|-----------------|---------------|-------------|-------------|---------------|
| SAMD12-AS1      | SAMD12-AS1    | 0           | 4.062365016 | 1.785711506   |
| 0               |               |             |             |               |
| C10orf111       | C10orf111     | 53.88308042 | 66.01343151 |               |
| 34.82137437     | 32.05364364   |             |             |               |
| OR5AU1 OR5AU1   | 0 0           | 0           | 4.713771124 |               |
| DKFZP586I1420   | DKFZP586I1420 | 159.3064986 | 110.6994467 |               |
| 263.3924471     | 321.4791906   |             |             |               |
| LOC541473       | LOC541473     | 30.45565415 | 42.65483267 |               |
| 66.96418148     | 57.50800771   |             |             |               |
| MIR491 MIR491   | 4.685485254   | 1.015591254 | 0           | 0.942754225   |
| TMED11P TMED11P | 2.342742627   | 4.062365016 | 0           | 1.885508449   |
| ATP5I ATP5I     | 3694.505123   | 3983.148898 | 2724.102902 |               |
| 2672.708227     |               |             |             |               |
| LOC101928847    | LOC101928847  | 0           | 2.031182508 | 0 0           |
| LOC641367       | LOC641367     | 25.7701689  | 20.31182508 |               |
| 31.24995136     | 6.599279573   |             |             |               |
| UQCRBP1 UQCRBP1 | 2.342742627   | 0           | 8.92855753  | 0.942754225   |
| KIAA0125        | KIAA0125      | 5.856856567 | 5.07795627  | 0             |
| 0               |               |             |             |               |
| RBM8A RBM8A     | 10788.3298    | 14152.26413 | 11924.08858 |               |
| 11425.23845     |               |             |             |               |
| ZNF271 ZNF271   | 1404.474205   | 1546.74548  | 2345.532063 |               |
| 2289.007258     |               |             |             |               |
| FBX022-AS1      | FBX022-AS1    | 1027.292642 | 1590.415904 |               |
| 1293.747986     | 940.8687163   |             |             |               |
| CXorf23 CXorf23 | 461.5202975   | 202.1026596 | 296.42811   |               |
| 616.561263      |               |             |             |               |
| FTX FTX         | 222.5605496   | 155.3854619 | 247.3210436 |               |
| 248.8871153     |               |             |             |               |
| MIR766 MIR766   | 0 0           | 0.892855753 | 0           |               |
| LOC100288846    | LOC100288846  | 40.99799597 | 25.38978135 |               |
| 118.7498152     | 22.62610139   |             |             |               |
| CPEB2-AS1       | CPEB2-AS1     | 3.51411394  | 1.015591254 |               |
| 1.785711506     | 0             |             |             |               |
| WASH7P WASH7P   | 158.1351273   | 83.27848283 | 118.7498152 |               |
| 118.7870323     |               |             |             |               |
| NRON NRON       | 0 0           | 0           | 7.542033798 |               |
| GSTM2P1 GSTM2P1 | 2.342742627   | 0           | 0           | 0             |
| MIR1288 MIR1288 | 0 2.031182508 | 0           | 0           |               |
| MIR1307 MIR1307 | 23.42742627   | 22.34300759 | 18.74997081 |               |
| 30.16813519     |               |             |             |               |
| LINC01089       | LINC01089     | 270.5867734 | 194.9935208 |               |
| 159.8211798     | 183.8370738   |             |             |               |
| LINC00294       | LINC00294     | 138.221815  | 88.3564391  |               |
| 83.92844078     | 69.76381263   |             |             |               |
| LOC441455       | LOC441455     | 0           | 9.140321286 | 42.85707615   |
| 0               |               |             |             |               |
| MYLIP MYLIP     | 520.0888632   | 333.1139313 | 1598.211798 |               |
| 1271.775449     |               |             |             |               |
| PPARGC1A        | PPARGC1A      | 0           | 0           | 7.142846024 0 |

|             |             |             |             |             |             |
|-------------|-------------|-------------|-------------|-------------|-------------|
| PREB        | PREB        | 7495.605035 | 10492.07325 | 7357.131405 |             |
| 6577.596226 |             |             |             |             |             |
| LINC00997   | LINC00997   |             | 7.028227881 | 1.015591254 |             |
| 11.60712479 | 8.484788022 |             |             |             |             |
| FOXN3-AS1   | FOXN3-AS1   |             | 147.5927855 | 141.1671843 |             |
| 176.7854391 | 162.1537267 |             |             |             |             |
| FGF14-IT1   | FGF14-IT1   |             | 0           | 0.892855753 | 0           |
| SBF2-AS1    | SBF2-AS1    |             | 91.36696245 | 149.2919143 |             |
| 199.1068329 | 219.6617344 |             |             |             |             |
| GTSE1-AS1   | GTSE1-AS1   |             | 55.05445173 | 50.7795627  |             |
| 22.32139383 | 59.39351616 |             |             |             |             |
| WWC2-AS2    | WWC2-AS2    |             | 0           | 0           | 11.60712479 |
| 0.942754225 |             |             |             |             |             |
| SMCR5       | SMCR5       | 0           | 0           | 13.3928363  | 0.942754225 |
| LINC00476   | LINC00476   |             | 427.5505294 | 826.6912808 |             |
| 1132.141095 | 653.3286777 |             |             |             |             |
| FAM35BP     | FAM35BP     | 0           | 2.031182508 | 4.464278765 | 8.484788022 |
| HOXB13      | HOXB13      | 4.685485254 | 3.046773762 | 0           | 0           |
| EIF3M       | EIF3M       | 8712.65983  | 10374.26466 | 9242.842755 |             |
| 9664.173558 |             |             |             |             |             |
| TRPV6       | TRPV6       | 15.22782708 | 0           | 0           | 6.599279573 |
| SHISA8      | SHISA8      | 11.71371313 | 10.15591254 | 6.249990271 |             |
| 17.91233027 |             |             |             |             |             |
| UNC13B      | UNC13B      | 63.25405093 | 34.53010264 | 291.9638312 |             |
| 111.2449985 |             |             |             |             |             |
| NPHP3-AS1   | NPHP3-AS1   |             | 9.370970508 | 9.140321286 |             |
| 11.60712479 | 9.427542247 |             |             |             |             |
| RPL13AP6    | RPL13AP6    |             | 10.54234182 | 6.093547524 |             |
| 12.49998054 | 7.542033798 |             |             |             |             |
| MIR1244-2   | MIR1244-2   |             | 8910.621581 | 8917.906802 |             |
| 7433.024144 | 7996.441334 |             |             |             |             |
| DNM1P35     | DNM1P35     | 0           | 0           | 1.785711506 | 2.828262674 |
| POM121L10P  | POM121L10P  |             | 4.685485254 | 0           | 0           |
| 10.37029647 |             |             |             |             |             |
| MIR4523     | MIR4523     | 0           | 2.031182508 | 1.785711506 | 0           |
| MIR4521     | MIR4521     | 0           | 0           | 17.85711506 | 0           |
| MIR4519     | MIR4519     | 5.856856567 | 12.18709505 | 5.357134518 |             |
| 4.713771124 |             |             |             |             |             |
| MIR4518     | MIR4518     | 3.51411394  | 4.062365016 | 0           | 3.771016899 |
| MIR4517     | MIR4517     | 31.62702546 | 1.015591254 | 16.96425931 |             |
| 12.25580492 |             |             |             |             |             |
| LARP4B      | LARP4B      | 7439.379212 | 5478.099224 | 4737.492626 |             |
| 4502.594177 |             |             |             |             |             |
| RIC8B       | RIC8B       | 531.8025763 | 674.3525927 | 806.248745  |             |
| 812.6541417 |             |             |             |             |             |
| TTC17       | TTC17       | 3331.380015 | 3252.938787 | 4312.493287 |             |
| 4067.98448  |             |             |             |             |             |
| WDR73       | WDR73       | 1459.528657 | 1421.827756 | 1723.211603 |             |
| 1544.23142  |             |             |             |             |             |
| LOC729609   | LOC729609   |             | 1.171371313 | 1.015591254 |             |

|                |                |             |             |             |
|----------------|----------------|-------------|-------------|-------------|
| 4.464278765    | 4.713771124    |             |             |             |
| FLJ42627       | FLJ42627       | 30.45565415 | 45.70160643 |             |
| 14.28569205    | 25.45436407    |             |             |             |
| LOC100128573   | LOC100128573   | 2.342742627 | 9.140321286 |             |
| 4.464278765    | 10.37029647    |             |             |             |
| SERPINA13P     | SERPINA13P     | 0           | 0           | 7.142846024 |
| LINC00909      | LINC00909      | 673.5385052 | 618.4950737 | 0           |
| 1349.105043    | 1238.779051    |             |             |             |
| PAXIP10S       | PAXIP10S       | 420.5223015 | 517.9515396 |             |
| 1189.283863    | 956.8955381    |             |             |             |
| MIR5087        | MIR5087        | 0           | 0           | 2.678567259 |
| MIR5010        | MIR5010        | 50.36896648 | 103.5903079 | 76.78559476 |
| 57.50800771    |                |             |             |             |
| MIR5001        | MIR5001        | 57.39719436 | 46.71719769 | 74.99988325 |
| 49.02321969    |                |             |             |             |
| MIR5000        | MIR5000        | 1.171371313 | 0           | 0           |
| MIR4999        | MIR4999        | 3.51411394  | 0           | 4.464278765 |
| MIR5006        | MIR5006        | 10.54234182 | 12.18709505 | 47.32135491 |
| 32.99639787    |                |             |             |             |
| LOC100996251   | LOC100996251   | 22.25605496 | 19.29623383 |             |
| 43.7499319     | 43.36669434    |             |             |             |
| CTAGE4         | CTAGE4         | 2.342742627 | 2.031182508 | 0           |
| PCSK4          | PCSK4          | 14.05645576 | 6.093547524 | 29.46423985 |
| 50.90872813    |                |             |             |             |
| HIF1AN         | HIF1AN         | 6554.99387  | 7210.697904 | 5027.670745 |
| 6107.161868    |                |             |             |             |
| MREG           | MREG           | 542.3449181 | 824.6600983 | 628.5704501 |
| 776.8294812    |                |             |             |             |
| LOC729737      | LOC729737      | 14.05645576 | 2.031182508 |             |
| 27.67852834    | 29.22538097    |             |             |             |
| TSIX           | TSIX           | 0           | 558.5751897 | 1416.069224 |
| LINC00888      | LINC00888      | 309.2420268 | 227.4924409 | 0           |
| 149.9997665    | 158.3827098    |             |             |             |
| KLHL7-AS1      | KLHL7-AS1      | 23.42742627 | 5.07795627  |             |
| 34.82137437    | 101.8174563    |             |             |             |
| MGC27345       | MGC27345       | 575.1433149 | 409.2832754 |             |
| 524.9991828    | 516.6293151    |             |             |             |
| TMEM256-PLSCR3 | TMEM256-PLSCR3 | 5911.911019 | 7592.560215 |             |
| 3683.029981    | 4126.435242    |             |             |             |
| FAM175A        | FAM175A        | 2924.91417  | 2582.648559 | 2543.74604  |
| 2784.89598     |                |             |             |             |
| OR56B4         | OR56B4         | 0           | 0           | 0.942754225 |
| LOC101926962   | LOC101926962   | 0           | 0           | 7.142846024 |
| MIR4734        | MIR4734        | 4.685485254 | 8.124730032 | 7.142846024 |
| 11.3130507     |                |             |             |             |
| MIR4730        | MIR4730        | 2.342742627 | 0           | 0           |
| MIR4729        | MIR4729        | 1.171371313 | 0           | 1.785711506 |
| MIR4728        | MIR4728        | 0           | 0           | 0.942754225 |
| MIR4727        | MIR4727        | 1.171371313 | 1.015591254 | 0           |
| MIR4726        | MIR4726        | 1.171371313 | 0           | 0           |
|                |                |             |             | 0.942754225 |

|              |              |             |             |             |
|--------------|--------------|-------------|-------------|-------------|
| ZBTB39       | ZBTB39       | 454.4920696 | 506.7800358 | 681.2489396 |
| 924.8418944  |              |             |             |             |
| HERC2P10     | HERC2P10     |             | 23.42742627 | 29.45214637 |
| 69.64274874  | 36.76741476  |             |             |             |
| RAD51-AS1    | RAD51-AS1    |             | 325.6412251 | 187.884382  |
| 554.4634226  | 372.3879188  |             |             |             |
| FGF2         | FGF2         | 213.1895791 | 233.5859884 | 159.8211798 |
| 144.2413964  |              |             |             |             |
| FA2H         | FA2H         | 10.54234182 | 7.109138778 | 0           |
| CHL1-AS1     | CHL1-AS1     |             | 0           | 1.885508449 |
| TDRD9        | TDRD9        | 50.36896648 | 183.822017  | 0.892855753 |
| 7.542033798  |              |             |             | 0           |
| CXCR6        | CXCR6        | 13573.85078 | 6964.92482  | 139.2854975 |
| 11686.38137  |              |             |             |             |
| GNG8         | GNG8         | 270.5867734 | 932.3127712 | 3515.1731   |
| 430.8386807  |              |             |             |             |
| AVPI1        | AVPI1        | 80.82462063 | 149.2919143 | 561.6062687 |
| 262.0856745  |              |             |             |             |
| FBXL15       | FBXL15       | 1152.629372 | 1535.573976 | 246.4281878 |
| 1226.523246  |              |             |             |             |
| TMEM119      | TMEM119      | 8.199599194 | 17.26505132 | 1515.176213 |
| ZNF776       | ZNF776       | 1016.7503   | 510.8424008 | 0           |
| 1065.312274  |              |             |             | 32.05364364 |
| SAMSN1-AS1   | SAMSN1-AS1   |             | 3.51411394  | 1338.390774 |
| 5.357134518  | 5.656525348  |             |             |             |
| C8orf31      | C8orf31      | 37.48388203 | 134.0580455 | 3.046773762 |
| 32.99639787  |              |             |             |             |
| LOC101928053 | LOC101928053 |             | 43.3407386  | 79.46416202 |
| 29.46423985  | 55.62249926  |             |             |             |
| NAV2-AS2     | NAV2-AS2     |             | 0           | 28.43655511 |
| 6.599279573  |              |             | 6.093547524 | 0           |
| CARD17       | CARD17       | 171.0202118 | 188.8999733 | 89.2855753  |
| 114.0732612  |              |             |             |             |
| PTRHD1       | PTRHD1       | 1571.980303 | 1826.033075 | 798.2130432 |
| 747.6041002  |              |             |             |             |
| CCL16        | CCL16        | 0           | 1.785711506 | 0           |
| KLHDC10      | KLHDC10      | 326.8125965 | 154.3698706 | 145.5354877 |
| 174.4095316  |              |             |             |             |
| FTH1         | FTH1         | 95462.07656 | 181683.1818 | 108736.4379 |
| 78361.73116  |              |             |             |             |
| TMEM244      | TMEM244      | 2.342742627 | 10.15591254 | 4.464278765 |
| 7.542033798  |              |             |             |             |
| MIR3620      | MIR3620      | 175.705697  | 255.928996  | 205.3568232 |
| 181.0088111  |              |             |             |             |
| MIR23C       | MIR23C       | 1.171371313 | 0           | 0           |
| MIR4737      | MIR4737      | 17.5705697  | 14.21827756 | 0           |
| 10.37029647  |              |             |             | 11.60712479 |
| MIR4736      | MIR4736      | 8.199599194 | 9.140321286 | 6.249990271 |
| 10.37029647  |              |             |             |             |
| HES5         | HES5         | 7.028227881 | 8.124730032 | 8.92855753  |



|                 |              |             |             |             |             |
|-----------------|--------------|-------------|-------------|-------------|-------------|
| 1.885508449     |              |             |             |             |             |
| PLEKHA8P1       | PLEKHA8P1    | 172.1915831 |             | 193.9779295 |             |
| 217.8568037     | 263.0284287  |             |             |             |             |
| LOC100289473    | LOC100289473 | 3.51411394  | 0           | 4.464278765 |             |
| 0               |              |             |             |             |             |
| ATP6V0CP3       | ATP6V0CP3    | 0           | 0           | 0           | 2.828262674 |
| FOXN3-AS2       | FOXN3-AS2    | 0           | 3.046773762 | 0           | 0           |
| LOC100129550    | LOC100129550 | 10.54234182 |             | 8.124730032 |             |
| 0.892855753     | 2.828262674  |             |             |             |             |
| LOC100131496    | LOC100131496 | 3.51411394  |             | 15.23386881 |             |
| 2.678567259     | 0.942754225  |             |             |             |             |
| LOC100630918    | LOC100630918 | 101.9093043 |             | 123.902133  |             |
| 134.8212187     | 88.61889712  |             |             |             |             |
| CYP2D7P CYP2D7P | 23.42742627  | 2.031182508 |             | 51.78563368 |             |
| 22.62610139     |              |             |             |             |             |
| LOC642423       | LOC642423    | 5.856856567 |             | 1.015591254 |             |
| 1.785711506     | 1.885508449  |             |             |             |             |
| NAPA-AS1        | NAPA-AS1     | 1773.456169 |             | 2689.285641 |             |
| 3844.636873     | 2401.19501   |             |             |             |             |
| LOC100506746    | LOC100506746 | 25.7701689  |             | 25.38978135 |             |
| 85.71415229     | 55.62249926  |             |             |             |             |
| NEGR1-IT1       | NEGR1-IT1    | 0           | 0           | 5.357134518 | 0           |
| LOC574538       | LOC574538    | 1.171371313 |             | 4.062365016 |             |
| 24.10710533     | 0            |             |             |             |             |
| HERC2P7 HERC2P7 | 22.25605496  | 23.35859884 |             | 19.64282657 |             |
| 10.37029647     |              |             |             |             |             |
| LINC00987       | LINC00987    | 48.02622385 |             | 25.38978135 |             |
| 55.35705669     | 52.79423658  |             |             |             |             |
| HERC2P3 HERC2P3 | 33.96976809  | 201.0870683 |             | 256.2496011 |             |
| 39.59567744     |              |             |             |             |             |
| PTDSS2 PTDSS2   | 850.4155736  | 1258.317564 |             | 649.9989882 |             |
| 952.181767      |              |             |             |             |             |
| SH3GL3 SH3GL3   | 0            | 4.062365016 | 0           | 0           |             |
| DSCR9 DSCR9     | 11.71371313  | 15.23386881 |             | 12.49998054 |             |
| 17.91233027     |              |             |             |             |             |
| MIR19B1 MIR19B1 | 3.51411394   | 1.015591254 |             | 0           | 1.885508449 |
| LINC01270       | LINC01270    | 3.51411394  |             | 39.60805891 | 0           |
| 0               |              |             |             |             |             |
| NDUFA6-AS1      | NDUFA6-AS1   | 77.31050669 |             | 73.12257029 |             |
| 83.92844078     | 62.22177883  |             |             |             |             |
| FAM172BP        | FAM172BP     | 180.3911823 |             | 339.2074789 |             |
| 372.320849      | 482.6901631  |             |             |             |             |
| LINC01225       | LINC01225    | 0           | 0           | 1.785711506 | 0           |
| YPEL4 YPEL4     | 1.171371313  | 3.046773762 |             | 22.32139383 |             |
| 22.62610139     |              |             |             |             |             |
| ZNF365 ZNF365   | 0            | 31.48332888 | 41.07136464 | 97.10368515 |             |
| STAU2-AS1       | STAU2-AS1    | 2.342742627 |             | 2.031182508 | 0           |
| 0.942754225     |              |             |             |             |             |
| APOC4-APOC2     | APOC4-APOC2  | 0           | 0           | 4.464278765 |             |
| 1.885508449     |              |             |             |             |             |

|                 |                 |             |             |             |   |
|-----------------|-----------------|-------------|-------------|-------------|---|
| SLM02-ATP5E     | SLM02-ATP5E     | 17155.90426 | 15166.83979 |             |   |
| 11616.9462      | 12323.68323     |             |             |             |   |
| P2RX5-TAX1BP3   | P2RX5-TAX1BP3   | 7508.490119 | 9346.486311 |             |   |
| 4215.17201      | 4594.984091     |             |             |             |   |
| BEND3P3 BEND3P3 | 48.02622385     | 25.38978135 | 133.0355072 |             |   |
| 104.6457189     |                 |             |             |             |   |
| LINC00893       | LINC00893       | 59.73993699 | 11.17150379 |             |   |
| 50.89277792     | 35.82466054     |             |             |             |   |
| LINC00657       | LINC00657       | 2202.178069 | 1255.27079  |             |   |
| 1969.639791     | 2379.511663     |             |             |             |   |
| ZNF738 ZNF738   | 412.3227023     | 394.0494066 | 416.0707809 |             |   |
| 434.6096976     |                 |             |             |             |   |
| GOLGA8CP        | GOLGA8CP        | 0           | 0           | 0.892855753 | 0 |
| FAM181A-AS1     | FAM181A-AS1     | 3.51411394  | 0           | 0           | 0 |
| AMZ2P1 AMZ2P1   | 454.4920696     | 464.1252031 | 914.2842911 |             |   |
| 570.366306      |                 |             |             |             |   |
| AFAP1-AS1       | AFAP1-AS1       | 31.62702546 | 42.65483267 |             |   |
| 92.85699832     | 146.1269048     |             |             |             |   |
| GOLGA2P7        | GOLGA2P7        | 25.7701689  | 7.109138778 |             |   |
| 15.1785478      | 16.02682182     |             |             |             |   |
| FLJ10038        | FLJ10038        | 1121.002347 | 768.8025793 |             |   |
| 1137.498229     | 946.5252416     |             |             |             |   |
| RPSAP9 RPSAP9   | 25.7701689      | 66.01343151 | 38.39279738 |             |   |
| 44.30944856     |                 |             |             |             |   |
| FLJ43681        | FLJ43681        | 0           | 2.031182508 | 0.892855753 |   |
| 0               |                 |             |             |             |   |
| LIMS3-LOC440895 | LIMS3-LOC440895 | 0           | 2.031182508 | 0.892855753 |   |
| 1.885508449     |                 |             |             |             |   |
| 9-Mar 9-Mar     | 48.02622385     | 26.40537261 | 137.499786  |             |   |
| 121.615295      |                 |             |             |             |   |
| CREB3L2 CREB3L2 | 2131.895791     | 1448.233128 | 1070.534048 |             |   |
| 1430.158159     |                 |             |             |             |   |
| TRMT5 TRMT5     | 876.1857425     | 672.3214102 | 725.8917272 |             |   |
| 893.731005      |                 |             |             |             |   |
| PRH1 PRH1       | 882.042599      | 979.0299689 | 1100.891143 |             |   |
| 840.9367684     |                 |             |             |             |   |
| CTAGE11P        | CTAGE11P        | 0           | 1.015591254 | 0           | 0 |
| GUSBP3 GUSBP3   | 96.0524477      | 81.24730032 | 98.21413283 |             |   |
| 125.3863119     |                 |             |             |             |   |
| A2M-AS1 A2M-AS1 | 1.171371313     | 0           | 0.892855753 | 37.71016899 |   |
| LOC100132215    | LOC100132215    | 55.05445173 | 76.16934405 |             |   |
| 46.42849916     | 80.1341091      |             |             |             |   |
| SNORA80B        | SNORA80B        | 25.7701689  | 17.26505132 |             |   |
| 25.89281684     | 42.42394011     |             |             |             |   |
| LINC00662       | LINC00662       | 178.0484396 | 212.2585721 |             |   |
| 289.285264      | 329.9639787     |             |             |             |   |
| C3P1 C3P1       | 0               | 0           | 0.942754225 |             |   |
| FAM35DP FAM35DP | 0               | 5.07795627  | 25.89281684 | 28.28262674 |   |
| MIR4271 MIR4271 | 24.59879758     | 5.07795627  | 30.3570956  |             |   |
| 13.19855915     |                 |             |             |             |   |

|                 |               |             |               |
|-----------------|---------------|-------------|---------------|
| FLJ42351        | FLJ42351      | 9.370970508 | 5.07795627    |
| 7.142846024     | 13.19855915   |             |               |
| DEFA10P DEFA10P | 0 0           | 0.892855753 | 0             |
| CYP1B1-AS1      | CYP1B1-AS1    | 45.68348122 | 10.15591254   |
| 3.571423012     | 5.656525348   |             |               |
| GNN GNN         | 21.08468364   | 11.17150379 | 23.21424958   |
| 12.25580492     |               |             |               |
| C21orf128       | C21orf128     | 2.342742627 | 1.015591254   |
| 0.892855753     | 0             |             |               |
| LOC654342       | LOC654342     | 183.9052962 | 84.29407409   |
| 4.464278765     | 109.3594901   |             |               |
| LOC728743       | LOC728743     | 647.7683363 | 578.8870148   |
| 1057.141212     | 783.4287607   |             |               |
| INAFM1 INAFM1   | 206.1613512   | 273.1940473 | 313.3923693   |
| 255.4863949     |               |             |               |
| PCDHGA6 PCDHGA6 | 0 14.21827756 | 9.821413283 | 12.25580492   |
| TMEM170A        | TMEM170A      | 1055.405553 | 1041.996627   |
| 1366.962158     | 1196.355111   |             |               |
| ZG16B ZG16B     | 101.9093043   | 238.6639447 | 35.71423012   |
| 69.76381263     |               |             |               |
| SPACA7 SPACA7   | 0 0           | 2.678567259 | 0             |
| ACAP3 ACAP3     | 1794.540852   | 907.9385811 | 555.3562784   |
| 612.7902461     |               |             |               |
| RAP2C-AS1       | RAP2C-AS1     | 45.68348122 | 68.04461402   |
| 47.32135491     | 85.79063445   |             |               |
| LOC388882       | LOC388882     | 0 0         | 0.892855753 0 |
| NME5 NME5       | 2.342742627   | 1.015591254 | 0 1.885508449 |
| PGBD2 PGBD2     | 477.9194959   | 663.1810889 | 1211.605257   |
| 867.3338867     |               |             |               |
| TSKS TSKS       | 39.82662466   | 20.31182508 | 36.60708587   |
| 51.85148236     |               |             |               |
| TUBA1C TUBA1C   | 12354.45324   | 15457.29889 | 8368.736973   |
| 10903.89536     |               |             |               |
| APOL6 APOL6     | 7076.254105   | 4169.002098 | 18224.07878   |
| 8314.149508     |               |             |               |
| RPARP-AS1       | RPARP-AS1     | 359.6109932 | 320.9268363   |
| 541.0705863     | 655.2141862   |             |               |
| SENCR SENCN     | 48.02622385   | 30.46773762 | 19.64282657   |
| 21.68334717     |               |             |               |
| MIR4458HG       | MIR4458HG     | 124.1653592 | 120.8553592   |
| 225.8925055     | 170.6385147   |             |               |
| LOC100130899    | LOC100130899  | 0 0         | 0 5.656525348 |
| FLJ22447        | FLJ22447      | 60.9113083  | 21.32741634   |
| 4.464278765     | 32.99639787   |             |               |
| PLEKHA7 PLEKHA7 | 166.3347265   | 120.8553592 | 87.4998638    |
| 156.4972013     |               |             |               |
| MIR3911 MIR3911 | 26.94154021   | 20.31182508 | 59.82133545   |
| 37.71016899     |               |             |               |
| MIR3917 MIR3917 | 3017.452503   | 3962.837073 | 1378.569283   |
| 1805.37434      |               |             |               |

|                |                |             |             |             |             |
|----------------|----------------|-------------|-------------|-------------|-------------|
| MIR3916        | MIR3916        | 40.99799597 | 35.54569389 | 66.96418148 |             |
| 73.53482953    |                |             |             |             |             |
| SERF2-C150RF63 | SERF2-C150RF63 | 10904.44731 | 10876.18265 | 14727.08878 |             |
| 10274.13554    |                |             |             |             |             |
| LOC100506071   | LOC100506071   | 19.79783872 | 37.48388203 | 43.67042392 | 0           |
| LOC100505715   | LOC100505715   | 167.8568816 | 44.51210991 | 50.7795627  |             |
| 137.6421168    |                |             |             |             |             |
| STX17-AS1      | STX17-AS1      | 26.78567259 | 2.342742627 | 3.046773762 |             |
| 10.37029647    |                |             |             |             |             |
| C1orf56        | C1orf56        | 312.0516484 | 248.8198572 | 335.7137631 |             |
| 757.8772398    |                |             |             |             |             |
| PYURF          | PYURF          | 7464.727951 | 8025.20209  | 10278.55543 |             |
| 5466.78992     |                |             |             |             |             |
| FAM73B         | FAM73B         | 1758.236629 | 1476.669683 | 2094.639597 |             |
| 1988.98849     |                |             |             |             |             |
| LINC01136      | LINC01136      | 41.96422039 | 38.65525334 | 39.60805891 |             |
| 23.56885562    |                |             |             |             |             |
| FLJ21408       | FLJ21408       | 147.3211993 | 35.1411394  | 48.74838019 |             |
| 142.3558879    |                |             |             |             |             |
| CASC14         | CASC14         | 28.11291152 | 5.07795627  | 0           | 3.771016899 |
| MIR3146        | MIR3146        | 0           | 1.015591254 | 0           | 0           |
| MIR3136        | MIR3136        | 1.885508449 | 3.51411394  | 1.015591254 | 2.678567259 |
| GUCY1B3        | GUCY1B3        | 95.2181767  | 94.44998663 | 99.99984434 |             |
| 161.6492413    |                |             |             |             |             |
| CFLAR-AS1      | CFLAR-AS1      | 2039.28254  | 1744.171886 | 2230.238394 |             |
| 1787.46201     |                |             |             |             |             |
| TUBA1B         | TUBA1B         | 125625.7715 | 219547.4705 | 101506.9849 |             |
| 161480.5638    |                |             |             |             |             |
| TTI1           | TTI1           | 3624.889994 | 4784.450398 | 3386.601871 |             |
| 4690.170739    |                |             |             |             |             |
| SAFB2          | SAFB2          | 3744.619781 | 3331.139313 | 4699.992684 |             |
| 2756.236701    |                |             |             |             |             |
| ASPRV1         | ASPRV1         | 77.30584643 | 40.62365016 | 39.28565313 |             |
| 40.99799597    |                |             |             |             |             |
| SH3PXD2A       | SH3PXD2A       | 380.3565508 | 408.8085884 | 225.4612584 |             |
| 343.1625378    |                |             |             |             |             |
| NPPC           | NPPC           | 1.171371313 | 10.15591254 | 0           | 8.484788022 |
| ODF1           | ODF1           | 1.171371313 | 1.015591254 | 0           | 0.942754225 |
| LOC100128239   | LOC100128239   | 78.57130627 | 4.685485254 | 2.031182508 |             |
| 5.656525348    |                |             |             |             |             |
| LRR37A6P       | LRR37A6P       | 63.39275847 | 9.370970508 | 2.031182508 |             |
| 49.96597391    |                |             |             |             |             |
| ARHGAP5-AS1    | ARHGAP5-AS1    | 29.46423985 | 3.51411394  | 4.062365016 |             |
| 30.16813519    |                |             |             |             |             |
| OR13A1         | OR13A1         | 0           | 6.093547524 | 0           | 0           |
| CERS6-AS1      | CERS6-AS1      | 603.570489  | 1848.423933 | 633.7289425 |             |
| 847.536048     |                |             |             |             |             |
| MIR3714        | MIR3714        | 0           | 0           | 5.656525348 |             |

|               |               |             |   |             |             |             |
|---------------|---------------|-------------|---|-------------|-------------|-------------|
| MIR4314       | MIR4314       | 0           | 0 | 0           | 0.942754225 |             |
| MIR4306       | MIR4306       | 1.171371313 |   | 0           | 0           | 0           |
| MIR4316       | MIR4316       | 1.171371313 |   | 0           | 0           | 0           |
| MIR3677       | MIR3677       | 0           | 0 | 0           | 0.942754225 |             |
| MIR3671       | MIR3671       | 2.342742627 |   | 0           | 28.5713841  | 11.3130507  |
| MIR3665       | MIR3665       | 69.11090749 |   | 78.20052656 |             | 51.78563368 |
|               |               | 47.13771124 |   |             |             |             |
| MIR3662       | MIR3662       | 5.856856567 |   | 2.031182508 |             | 7.142846024 |
| MIR3661       | MIR3661       | 2122.52482  |   | 3209.268363 |             | 2209.817989 |
|               |               | 2082.544082 |   |             |             |             |
| LOC100506274  | LOC100506274  |             |   | 4.685485254 |             | 5.07795627  |
|               |               | 21.42853807 |   |             |             |             |
|               |               | 5.656525348 |   |             |             |             |
| PGCP1         | PGCP1         | 0           | 0 | 13.3928363  |             | 0           |
| MAP2K4P1      | MAP2K4P1      |             |   | 40.99799597 |             | 29.45214637 |
|               |               | 15.1785478  |   |             |             |             |
|               |               | 22.62610139 |   |             |             |             |
| FKBP1A-SDCBP2 | FKBP1A-SDCBP2 |             |   | 1166.685828 |             | 1040.981035 |
|               |               | 607.1419121 |   |             |             |             |
|               |               | 606.1909665 |   |             |             |             |
| MTBP          | MTBP          | 1123.34509  |   | 792.1611782 |             | 534.8205961 |
|               |               | 667.4699911 |   |             |             |             |
| FEM1B         | FEM1B         | 2765.607671 |   | 1782.362651 |             | 2479.460426 |
|               |               | 3049.809917 |   |             |             |             |
| CDK12         | CDK12         | 964.038591  |   | 600.2144311 |             | 973.2127708 |
|               |               | 1043.628927 |   |             |             |             |
| MATN1-AS1     | MATN1-AS1     |             |   | 35.1411394  |             | 36.56128515 |
|               |               | 389.2851083 |   |             |             |             |
|               |               | 246.0588527 |   |             |             |             |
| KRT6A         | KRT6A         | 0           | 0 | 0.892855753 |             | 0           |
| MRPL41        | MRPL41        | 3040.87993  |   | 4102.988666 |             | 2228.56796  |
|               |               | 2072.173786 |   |             |             |             |
| MRPS6         | MRPS6         | 5814.6872   |   | 6937.503856 |             | 5173.206233 |
|               |               | 5505.684672 |   |             |             |             |
| LINC00578     | LINC00578     |             |   | 0           | 0           | 8.035701777 |
|               |               | 0.942754225 |   |             |             |             |
| LINC00668     | LINC00668     |             |   | 0           | 0           | 1.785711506 |
|               |               |             |   |             |             | 0           |
| LINC01277     | LINC01277     |             |   | 0           | 0           | 0           |
|               |               |             |   |             |             | 10.37029647 |
| LOC100130452  | LOC100130452  |             |   | 1.171371313 |             | 7.109138778 |
|               |               | 1.785711506 |   |             |             |             |
| PPP1R2P3      | PPP1R2P3      |             |   | 25.7701689  |             | 27.42096386 |
|               |               | 15.1785478  |   |             |             |             |
|               |               | 13.19855915 |   |             |             |             |
| ENTPD1-AS1    | ENTPD1-AS1    |             |   | 839.8732318 |             | 1467.529362 |
|               |               | 314.2852251 |   |             |             |             |
|               |               | 437.4379603 |   |             |             |             |
| LOC100132287  | LOC100132287  |             |   | 1.171371313 |             | 1.015591254 |
|               |               | 13.3928363  |   |             |             |             |
|               |               | 1.885508449 |   |             |             |             |
| PAXIP1-AS1    | PAXIP1-AS1    |             |   | 270.5867734 |             | 279.2875949 |
|               |               | 411.6065021 |   |             |             |             |
|               |               | 412.9263504 |   |             |             |             |
| MIR1178       | MIR1178       | 79.65324932 |   | 37.5768764  |             | 11.60712479 |
|               |               | 27.33987252 |   |             |             |             |
| MIR1248       | MIR1248       | 65.59679355 |   | 46.71719769 |             | 112.4998249 |
|               |               | 135.7566084 |   |             |             |             |
| MIR1291       | MIR1291       | 10.54234182 |   | 17.26505132 |             | 10.71426904 |
|               |               | 10.37029647 |   |             |             |             |

|              |              |             |             |             |
|--------------|--------------|-------------|-------------|-------------|
| LOC100129345 | LOC100129345 | 2.342742627 | 2.031182508 |             |
| 12.49998054  | 0.942754225  |             |             |             |
| NLE1         | NLE1         | 890.2421982 | 1196.366497 | 591.9633643 |
| 942.7542247  |              |             |             |             |
| MIR1229      | MIR1229      | 1.171371313 | 6.093547524 | 2.678567259 |
| 2.828262674  |              |             |             |             |
| MIR1227      | MIR1227      | 31.62702546 | 45.70160643 | 17.85711506 |
| 16.96957604  |              |             |             |             |
| MIR1234      | MIR1234      | 1.171371313 | 4.062365016 | 0.892855753 |
| 1.885508449  |              |             |             |             |
| SSSCA1-AS1   | SSSCA1-AS1   | 43.3407386  | 66.01343151 |             |
| 160.7140355  | 123.5008034  |             |             |             |
| C2orf27A     | C2orf27A     | 43.3407386  | 54.84192772 |             |
| 83.92844078  | 50.90872813  |             |             |             |
| GPR171       | GPR171       | 7970.010417 | 6254.010942 | 5892.84797  |
| 5894.099413  |              |             |             |             |
| SLC30A4      | SLC30A4      | 120.6512453 | 105.6214904 | 88.39271955 |
| 107.4739816  |              |             |             |             |
| TNFRSF13B    | TNFRSF13B    | 4.685485254 | 13.2026863  | 0           |
| 6.599279573  |              |             |             |             |
| DNAJC1       | DNAJC1       | 1164.343086 | 1248.161651 | 1170.533892 |
| 1109.621722  |              |             |             |             |
| GIMAP1       | GIMAP1       | 2711.724591 | 3141.223749 | 3632.137203 |
| 3063.008476  |              |             |             |             |
| LOC100129148 | LOC100129148 | 1855.452161 | 2272.893227 |             |
| 2008.925444  | 2105.170184  |             |             |             |
| LOC100499484 | LOC100499484 | 94.88107639 | 64.99784026 |             |
| 127.6783727  | 160.2682182  |             |             |             |
| RMRP         | RMRP         | 70.28227881 | 9.140321286 | 24.99996108 |
| 48.08046546  |              |             |             |             |
| GNAS-AS1     | GNAS-AS1     | 19.91331233 | 20.31182508 |             |
| 15.1785478   | 3.771016899  |             |             |             |
| LINC01023    | LINC01023    | 4.685485254 | 0           | 1.785711506 |
| 1.885508449  |              |             |             |             |
| NCF1C        | NCF1C        | 36.31251072 | 13.2026863  | 16.07140355 |
| 6.599279573  |              |             |             |             |
| NCF1B        | NCF1B        | 97.22381902 | 139.1360018 | 192.8568427 |
| 187.6080907  |              |             |             |             |
| PIAS4        | PIAS4        | 672.3671339 | 972.9364214 | 782.1416397 |
| 471.3771124  |              |             |             |             |
| LINC01012    | LINC01012    | 22.25605496 | 40.62365016 |             |
| 69.64274874  | 35.82466054  |             |             |             |
| PMS2P9       | PMS2P9       | 19.91331233 | 12.18709505 | 33.92851862 |
| 32.05364364  |              |             |             |             |
| HEPN1        | HEPN1        | 0           | 1.015591254 | 0           |
| GGA2         | GGA2         | 7697.080901 | 8701.585865 | 6616.06113  |
| 7468.498968  |              |             |             |             |
| ZHX2         | ZHX2         | 952.3248778 | 880.5176173 | 1995.532608 |
| 2075.002049  |              |             |             |             |
| DCBLD1       | DCBLD1       | 373.667449  | 619.510665  | 469.6421261 |

|              |              |             |             |             |             |             |
|--------------|--------------|-------------|-------------|-------------|-------------|-------------|
| 639.1873644  |              |             |             |             |             |             |
| KDM4A-AS1    | KDM4A-AS1    |             | 386.5525334 |             | 483.4214369 |             |
| 409.8207906  | 391.2430033  |             |             |             |             |             |
| GCSHP3       | GCSHP3       | 21.08468364 | 21.32741634 |             | 18.74997081 |             |
| 23.56885562  |              |             |             |             |             |             |
| WDR49        | WDR49        | 0           | 0           | 1.885508449 |             |             |
| LOC440028    | LOC440028    |             | 9.370970508 |             | 5.07795627  | 0           |
|              | 0.942754225  |             |             |             |             |             |
| ZNF205-AS1   | ZNF205-AS1   |             | 21.08468364 |             | 35.54569389 |             |
| 16.96425931  | 17.91233027  |             |             |             |             |             |
| LOC100240734 | LOC100240734 |             | 4.685485254 |             | 5.07795627  |             |
| 2.678567259  | 6.599279573  |             |             |             |             |             |
| FLJ12825     | FLJ12825     |             | 1.171371313 |             | 3.046773762 | 0           |
|              | 9.427542247  |             |             |             |             |             |
| CDH10        | CDH10        | 1.171371313 | 0           | 0.892855753 |             | 0           |
| GPRC5B       | GPRC5B       | 0           | 83.92844078 |             | 4.713771124 |             |
| NLK          | NLK          | 185.0766675 | 100.5435342 |             | 130.3569399 |             |
| 127.2718203  |              |             |             |             |             |             |
| POLR3K       | POLR3K       | 4274.333923 | 6147.373861 |             | 3238.387816 |             |
| 3591.893596  |              |             |             |             |             |             |
| DNAJB11      | DNAJB11      | 6321.890979 | 7804.818787 |             | 4604.457118 |             |
| 4519.563753  |              |             |             |             |             |             |
| SLC16A1-AS1  | SLC16A1-AS1  |             | 165.1633552 |             | 152.3386881 |             |
| 266.9638702  | 230.9747851  |             |             |             |             |             |
| TPRG1-AS2    | TPRG1-AS2    |             | 0           | 15.23386881 |             | 5.357134518 |
|              | 19.79783872  |             |             |             |             |             |
| EVL          | EVL          | 4316.50329  | 1582.291174 |             | 1852.675688 |             |
| 2279.579715  |              |             |             |             |             |             |
| GJB2         | GJB2         | 528.2884624 | 213.2741634 |             | 155.356901  |             |
| 835.2802431  |              |             |             |             |             |             |
| TNKS         | TNKS         | 1967.903807 | 1589.400313 |             | 2057.139655 |             |
| 1833.656967  |              |             |             |             |             |             |
| MIR16-2      | MIR16-2      | 10.54234182 | 4.062365016 |             | 5.357134518 |             |
| 11.3130507   |              |             |             |             |             |             |
| HUWE1        | HUWE1        | 8334.306895 | 3872.449452 |             | 2856.245554 |             |
| 4500.708669  |              |             |             |             |             |             |
| ADAM23       | ADAM23       | 4.685485254 | 6.093547524 |             | 123.2140939 |             |
| 195.1501245  |              |             |             |             |             |             |
| SNORA70G     | SNORA70G     |             | 25.7701689  |             | 18.28064257 |             |
| 8.035701777  | 25.45436407  |             |             |             |             |             |
| LOC100289511 | LOC100289511 |             | 2155.323217 |             | 1968.21585  |             |
| 3405.351842  | 3129.944026  |             |             |             |             |             |
| LOC100294362 | LOC100294362 |             | 788.332894  |             | 247.804266  |             |
| 241.9639091  | 369.5596561  |             |             |             |             |             |
| BCDIN3D-AS1  | BCDIN3D-AS1  |             | 331.4980817 |             | 416.3924142 |             |
| 733.0345732  | 583.5648651  |             |             |             |             |             |
| FAM133CP     | FAM133CP     |             | 1.171371313 |             | 0           | 0           |
| 0.942754225  |              |             |             |             |             |             |
| MST1P2       | MST1P2       | 2.342742627 | 0           | 101.7855558 |             | 103.7029647 |
| LOC100133050 | LOC100133050 |             | 0           | 3.046773762 |             | 0           |

|              |              |             |             |             |
|--------------|--------------|-------------|-------------|-------------|
| SNORD125     | SNORD125     | 12.88508445 | 5.07795627  |             |
| 2.678567259  | 2.828262674  |             |             |             |
| SNORD126     | SNORD126     | 2.342742627 | 0           | 0           |
| 0.942754225  |              |             |             |             |
| SCARNA27     | SCARNA27     | 2.342742627 | 0           | 8.92855753  |
| 9.427542247  |              |             |             |             |
| SNORD58C     | SNORD58C     | 18.74194102 | 4.062365016 |             |
| 33.03566286  | 47.13771124  |             |             |             |
| SNORD105B    | SNORD105B    | 0           | 0           | 0.892855753 |
| 0.942754225  |              |             |             |             |
| SNORD19B     | SNORD19B     | 50.36896648 | 37.5768764  |             |
| 83.92844078  | 98.04643937  |             |             |             |
| SNORA11C     | SNORA11C     | 0           | 0           | 4.464278765 |
| SNORA70B     | SNORA70B     | 4.685485254 | 8.124730032 | 0           |
| 1.885508449  |              |             |             |             |
| SNHG15       | SNHG15       | 1419.702032 | 2173.365284 | 3198.209307 |
| 2023.150566  |              |             |             |             |
| SNORD12B     | SNORD12B     | 3.51411394  | 0           | 0           |
| SNORA36C     | SNORA36C     | 0           | 2.031182508 | 0           |
| 3.771016899  |              |             |             |             |
| SNORA84      | SNORA84      | 57.39719436 | 78.20052656 | 155.356901  |
| 126.3290661  |              |             |             |             |
| SNHG9        | SNHG9        | 248.3307185 | 181.7908345 | 276.7852834 |
| 181.9515654  |              |             |             |             |
| LRR37A4P     | LRR37A4P     | 304.5565415 | 120.8553592 |             |
| 265.1781587  | 377.1016899  |             |             |             |
| SNX29P2      | SNX29P2      | 45.68348122 | 17.26505132 | 9.821413283 |
| 37.71016899  |              |             |             |             |
| H0XA11-AS    | H0XA11-AS    | 0           | 0           | 0           |
| TPTEP1       | TPTEP1       | 1.171371313 | 6.093547524 | 26.78567259 |
| 6.599279573  |              |             |             |             |
| SCARNA16     | SCARNA16     | 55.05445173 | 51.79515396 |             |
| 41.96422039  | 48.08046546  |             |             |             |
| SNORA67      | SNORA67      | 69.11090749 | 38.59246765 | 249.1067551 |
| 145.1841506  |              |             |             |             |
| RPL13P5      | RPL13P5      | 180.3911823 | 140.1515931 | 215.1782365 |
| 175.3522858  |              |             |             |             |
| PWARSN       | PWARSN       | 84.33873457 | 53.82633646 | 648.2132767 |
| 389.3574948  |              |             |             |             |
| LOC100130987 | LOC100130987 | 24.59879758 | 24.3741901  |             |
| 36.60708587  | 26.39711829  |             |             |             |
| DCTN1-AS1    | DCTN1-AS1    | 9.370970508 | 8.124730032 |             |
| 3.571423012  | 2.828262674  |             |             |             |
| USP27X-AS1   | USP27X-AS1   | 17.5705697  | 14.21827756 |             |
| 107.1426904  | 63.16453306  |             |             |             |
| LINC00921    | LINC00921    | 33.96976809 | 24.3741901  |             |
| 143.7497762  | 112.1877527  |             |             |             |
| PDCD6IPP2    | PDCD6IPP2    | 16.39919839 | 29.45214637 |             |
| 93.74985407  | 25.45436407  |             |             |             |
| LOC100130298 | LOC100130298 | 74.96776406 | 151.3230969 |             |



|                        |                        |             |             |             |             |
|------------------------|------------------------|-------------|-------------|-------------|-------------|
| 335.7137631            | 146.1269048            |             |             |             |             |
| RCAN3AS RCAN3AS        | 28.11291152            | 24.3741901  | 51.78563368 |             |             |
| 44.30944856            |                        |             |             |             |             |
| TFAP2A-AS1             | TFAP2A-AS1             | 12.88508445 | 6.093547524 | 0           |             |
| 4.713771124            |                        |             |             |             |             |
| RBM5-AS1               | RBM5-AS1               | 564.6009731 | 605.2923874 |             |             |
| 849.1058211            | 911.6433353            |             |             |             |             |
| MIR298 MIR298          | 0 0                    | 0           | 1.885508449 |             |             |
| MIR192 MIR192          | 0 0                    | 3.571423012 | 0           |             |             |
| LOC100507412           | LOC100507412           | 245.9879758 | 107.6526729 |             |             |
| 482.1421066            | 262.0856745            |             |             |             |             |
| MIR363 MIR363          | 0 1.015591254          | 0           | 0           |             |             |
| MIR130B MIR130B        | 0 3.046773762          | 8.92855753  | 0           |             |             |
| MIR150 MIR150          | 2.342742627            | 2.031182508 | 1.785711506 |             |             |
| 2.828262674            |                        |             |             |             |             |
| LINC01260              | LINC01260              | 128.8508445 | 296.5526462 |             |             |
| 430.356473             | 204.5776668            |             |             |             |             |
| LOC254896              | LOC254896              | 0           | 0           | 10.71426904 |             |
| 0.942754225            |                        |             |             |             |             |
| MIRLET7DHG             | MIRLET7DHG             | 26.94154021 | 4.062365016 |             |             |
| 33.92851862            | 34.88190631            |             |             |             |             |
| LOC550113              | LOC550113              | 0           | 0           | 3.571423012 | 0           |
| LOC101243545           | LOC101243545           | 96.0524477  | 154.3698706 |             |             |
| 194.6425542            | 146.1269048            |             |             |             |             |
| CXorf31 CXorf31        | 1.171371313            | 0           | 0           | 0.942754225 |             |
| USP45 USP45            | 700.4800454            | 900.8294423 | 916.9628584 |             |             |
| 797.5700741            |                        |             |             |             |             |
| LOC100505978           | LOC100505978           | 0           | 9.140321286 | 5.357134518 |             |
| 6.599279573            |                        |             |             |             |             |
| SMYD1 SMYD1            | 1.171371313            | 0           | 0           | 4.713771124 |             |
| DTX2P1-UPK3BP1-PMS2P11 | DTX2P1-UPK3BP1-PMS2P11 | 114.7943887 |             |             |             |
| 64.99784026            | 144.642632             | 107.4739816 |             |             |             |
| LINC00955              | LINC00955              | 0           | 0           | 0           | 2.828262674 |
| ARAP2 ARAP2            | 4006.089892            | 2442.496966 | 5092.849215 |             |             |
| 6941.499357            |                        |             |             |             |             |
| MIR3128 MIR3128        | 1.171371313            | 0           | 0.892855753 | 1.885508449 |             |
| LINC00612              | LINC00612              | 2.342742627 | 0           | 11.60712479 |             |
| 20.74059294            |                        |             |             |             |             |
| LOC100133286           | LOC100133286           | 1126.859204 | 2489.214164 |             |             |
| 2374.103447            | 1392.44799             |             |             |             |             |
| PTOV1-AS1              | PTOV1-AS1              | 243.6452332 | 205.1494333 |             |             |
| 136.6069302            | 172.5240231            |             |             |             |             |
| CYP46A1 CYP46A1        | 0 0                    | 4.464278765 | 0           |             |             |
| RPL23AP53              | RPL23AP53              | 330.3267104 | 185.8531995 |             |             |
| 408.9279349            | 559.0532553            |             |             |             |             |
| MIR4295 MIR4295        | 5.856856567            | 2.031182508 | 0           | 1.885508449 |             |
| CXCL16 CXCL16          | 131.1935871            | 213.2741634 | 603.570489  |             |             |
| 283.7690216            |                        |             |             |             |             |
| SKP1P2 SKP1P2          | 0 0                    | 1.785711506 | 0           |             |             |
| MIR3651 MIR3651        | 46.85485254            | 64.99784026 | 131.2497957 |             |             |

|              |              |             |   |             |             |             |
|--------------|--------------|-------------|---|-------------|-------------|-------------|
| 115.0160154  |              |             |   |             |             |             |
| MIR3650      | MIR3650      | 0           | 0 | 0           | 1.885508449 |             |
| LOC101928008 | LOC101928008 |             |   | 0           | 3.046773762 | 0.892855753 |
|              |              |             |   |             | 12.25580492 |             |
| TENM3        | TENM3        | 0           | 0 | 4.464278765 |             | 0           |
| DLG1-AS1     | DLG1-AS1     |             |   | 30.45565415 |             | 30.46773762 |
| 24.99996108  | 21.68334717  |             |   |             |             |             |
| TCEB3-AS1    | TCEB3-AS1    |             |   | 338.5263096 |             | 394.0494066 |
| 612.4990466  | 582.6221109  |             |   |             |             |             |
| LOC100506895 | LOC100506895 | 0           | 0 | 0           | 0.892855753 | 0           |
| LOC100128176 | LOC100128176 |             |   | 1.171371313 |             | 3.046773762 |
| 35.71423012  | 36.76741476  |             |   |             |             |             |
| FAM24B-CUZD1 | FAM24B-CUZD1 |             |   | 183.9052962 |             | 126.9489068 |
| 196.4282657  | 202.6921583  |             |   |             |             |             |
| LOC100233156 | LOC100233156 |             |   | 120.6512453 |             | 269.1316823 |
| 157.1426125  | 169.6957604  |             |   |             |             |             |
| SLFNL1-AS1   | SLFNL1-AS1   |             |   | 90.19559114 |             | 92.41880412 |
| 73.21417175  | 93.33266825  |             |   |             |             |             |
| LINC00487    | LINC00487    |             |   | 4.685485254 | 0           | 26.78567259 |
|              |              |             |   |             |             | 10.37029647 |
| C21orf54     | C21orf54     | 0           |   | 2.031182508 | 0           | 0           |
| ZFP91-CNTF   | ZFP91-CNTF   |             |   | 1596.5791   |             | 1585.337948 |
| 955.3556557  | 924.8418944  |             |   |             |             |             |
| LOC100506178 | LOC100506178 | 0           |   | 20.31182508 |             | 17.85711506 |
|              |              |             |   |             |             | 0           |
| MED4-AS1     | MED4-AS1     |             |   | 1884.736443 |             | 2239.378715 |
| 2149.996653  | 2060.860735  |             |   |             |             |             |
| H0XA10-H0XA9 | H0XA10-H0XA9 |             |   | 9.370970508 | 0           | 0           |
| 8.484788022  |              |             |   |             |             |             |
| SRGAP2B      | SRGAP2B      | 589.1997707 |   | 575.840241  |             | 324.9994941 |
| 378.0444441  |              |             |   |             |             |             |
| BACE1-AS     | BACE1-AS     |             |   | 0           | 1.015591254 | 0           |
| 1.885508449  |              |             |   |             |             |             |
| UBOX5-AS1    | UBOX5-AS1    |             |   | 213.1895791 |             | 220.3833021 |
| 292.856687   | 192.3218618  |             |   |             |             |             |
| MKNK1-AS1    | MKNK1-AS1    |             |   | 359.6109932 |             | 592.0897011 |
| 422.3207712  | 411.040842   |             |   |             |             |             |
| POU5F2       | POU5F2       | 2.342742627 |   | 0           | 0           | 0           |
| LSMEM2       | LSMEM2       | 1137.401545 |   | 1629.008372 |             | 1337.497918 |
| 1414.131337  |              |             |   |             |             |             |
| EPC2         | EPC2         | 154.6210134 |   | 100.5435342 |             | 299.1066773 |
| 407.2698251  |              |             |   |             |             |             |
| RPS16P5      | RPS16P5      | 70.28227881 |   | 39.60805891 |             | 38.39279738 |
| 40.53843166  |              |             |   |             |             |             |
| MIR4263      | MIR4263      | 23.42742627 |   | 36.56128515 |             | 37.49994163 |
| 13.19855915  |              |             |   |             |             |             |
| MIR4269      | MIR4269      | 0           | 0 | 4.464278765 |             | 1.885508449 |
| MIR4265      | MIR4265      | 0           | 0 | 0.892855753 |             | 0           |
| MIR4253      | MIR4253      | 1.171371313 |   | 1.015591254 | 0           | 0           |
| MIR4260      | MIR4260      | 3.51411394  |   | 3.046773762 | 0           | 0.942754225 |

|              |              |             |             |             |             |             |   |
|--------------|--------------|-------------|-------------|-------------|-------------|-------------|---|
| MIR4257      | MIR4257      | 0           | 0           | 2.678567259 | 0           |             |   |
| MIR4324      | MIR4324      | 0           | 4.062365016 | 5.357134518 | 16.02682182 |             |   |
| MIR4315-1    | MIR4315-1    |             |             | 228.4174061 | 262.0225435 |             |   |
| 290.1781197  | 234.745802   |             |             |             |             |             |   |
| AKR7L        | AKR7L        | 1.171371313 |             | 1.015591254 | 27.67852834 |             |   |
| 12.25580492  |              |             |             |             |             |             |   |
| LOC100652770 | LOC100652770 |             |             | 9.370970508 | 5.07795627  | 0           |   |
|              | 9.427542247  |             |             |             |             |             |   |
| LOC100287944 | LOC100287944 |             |             | 48.02622385 | 52.81074521 |             |   |
| 86.60700804  | 57.50800771  |             |             |             |             |             |   |
| MORF4L2-AS1  | MORF4L2-AS1  |             |             | 50.36896648 | 61.9510665  |             |   |
| 136.6069302  | 157.4399555  |             |             |             |             |             |   |
| LINC01239    | LINC01239    |             |             | 1.171371313 | 0           | 0           | 0 |
| LOC339874    | LOC339874    |             |             | 0           | 2.031182508 | 19.64282657 |   |
|              | 17.91233027  |             |             |             |             |             |   |
| LINC00547    | LINC00547    | 0           | 0           | 0           | 1.885508449 |             |   |
| LINC00894    | LINC00894    |             |             | 35.1411394  | 32.49892013 |             |   |
| 65.17846997  | 65.99279573  |             |             |             |             |             |   |
| MIR4515      | MIR4515      | 3.51411394  |             | 1.015591254 | 4.464278765 | 0           |   |
| MIR4513      | MIR4513      | 2.342742627 |             | 6.093547524 | 7.142846024 |             |   |
| 12.25580492  |              |             |             |             |             |             |   |
| MIR4511      | MIR4511      | 0           | 0           | 0.892855753 | 0           |             |   |
| IL10RB-AS1   | IL10RB-AS1   |             |             | 81.99599194 | 68.04461402 |             |   |
| 34.82137437  | 96.16093092  |             |             |             |             |             |   |
| MIRLET7D     | MIRLET7D     |             |             | 4.685485254 | 6.093547524 |             |   |
| 4.464278765  | 7.542033798  |             |             |             |             |             |   |
| SLC47A1      | SLC47A1      | 165.1633552 |             | 62.96665775 | 0           | 94.27542247 |   |
| MIR4762      | MIR4762      | 0           | 1.015591254 | 0           | 0           |             |   |
| MIR4724      | MIR4724      | 17.5705697  |             | 9.140321286 | 24.10710533 |             |   |
| 22.62610139  |              |             |             |             |             |             |   |
| CECR5-AS1    | CECR5-AS1    |             |             | 4.685485254 | 2.031182508 |             |   |
| 51.78563368  | 28.28262674  |             |             |             |             |             |   |
| ACN9         | ACN9         | 1042.520469 |             | 1089.729416 | 910.7128681 |             |   |
| 1153.931171  |              |             |             |             |             |             |   |
| CBWD2        | CBWD2        | 1013.236186 |             | 2032.198099 | 1496.426242 |             |   |
| 1070.968799  |              |             |             |             |             |             |   |
| HSCB         | HSCB         | 509.5465214 |             | 496.6241232 | 495.5349429 |             |   |
| 415.7546131  |              |             |             |             |             |             |   |
| LOC100506674 | LOC100506674 |             |             | 21.08468364 | 9.140321286 |             |   |
| 24.10710533  | 33.93915209  |             |             |             |             |             |   |
| HIST1H2AL    | HIST1H2AL    |             |             | 93.70970508 | 105.6214904 |             |   |
| 35.71423012  | 32.05364364  |             |             |             |             |             |   |
| MIR378D2     | MIR378D2     |             |             | 0           | 0           | 11.60712479 | 0 |
| MIR497       | MIR497       | 0           | 1.015591254 | 0           | 0           |             |   |
| MIR432       | MIR432       | 0           | 0           | 2.678567259 | 0           |             |   |
| PKD1P1       | PKD1P1       | 1793.369481 |             | 507.795627  | 1350.890754 |             |   |
| 1381.134939  |              |             |             |             |             |             |   |
| KRTAP5-2     | KRTAP5-2     |             |             | 2.342742627 | 0           | 0           |   |
| 0.942754225  |              |             |             |             |             |             |   |
| ZNF705A      | ZNF705A      | 3.51411394  |             | 0           | 0           | 0           |   |

|                 |              |             |             |             |
|-----------------|--------------|-------------|-------------|-------------|
| PLEKHG7 PLEKHG7 | 2.342742627  | 2.031182508 | 0           | 3.771016899 |
| WASH2P WASH2P   | 187.4194102  | 127.964498  | 128.5712284 |             |
| 171.5812689     |              |             |             |             |
| LOC100130744    | LOC100130744 | 742.6494127 | 754.5843018 |             |
| 625.8918829     | 787.1997776  |             |             |             |
| CCDC163P        | CCDC163P     | 295.185571  | 193.9779295 |             |
| 198.2139772     | 254.5436407  |             |             |             |
| SNORD103B       | SNORD103B    | 10.54234182 | 0           | 9.821413283 |
| 5.656525348     |              |             |             |             |
| LOC644554       | LOC644554    | 0           | 0           | 16.02682182 |
| ST3GAL4-AS1     | ST3GAL4-AS1  | 202.6472372 | 285.3811424 |             |
| 75.89273901     | 97.10368515  |             |             |             |
| LINC00163       | LINC00163    | 0           | 0           | 0.892855753 |
| MIRLET7A1       | MIRLET7A1    | 2.342742627 | 0           | 0.892855753 |
| 4.713771124     |              |             |             |             |
| MIR146B MIR146B | 0            | 0           | 1.885508449 |             |
| TUSC1 TUSC1     | 16.39919839  | 2.031182508 | 0           | 6.599279573 |
| PABPC5 PABPC5   | 0            | 4.464278765 | 0           |             |
| LOC100506321    | LOC100506321 | 931.2401942 | 847.0031059 |             |
| 1293.747986     | 851.3070649  |             |             |             |
| LINC00938       | LINC00938    | 577.4860575 | 483.4214369 |             |
| 572.3205377     | 805.1121079  |             |             |             |
| MIR4449 MIR4449 | 8.199599194  | 1.015591254 | 3.571423012 |             |
| 7.542033798     |              |             |             |             |
| LOC100132078    | LOC100132078 | 2.342742627 | 0           | 0           |
| 5.656525348     |              |             |             |             |
| MIR4442 MIR4442 | 187.4194102  | 154.3698706 | 128.5712284 |             |
| 147.0696591     |              |             |             |             |
| MIR4439 MIR4439 | 2.342742627  | 0           | 0.892855753 | 2.828262674 |
| MIR548AE2       | MIR548AE2    | 3.51411394  | 0           | 0           |
| MIR4437 MIR4437 | 7.028227881  | 4.062365016 | 2.678567259 | 0           |
| HOTAIRM1        | HOTAIRM1     | 45.68348122 | 21.32741634 |             |
| 31.24995136     | 49.02321969  |             |             |             |
| LOC100507351    | LOC100507351 | 1.171371313 | 0           | 0           |
| MIR4700 MIR4700 | 85.51010588  | 39.60805891 | 78.57130627 |             |
| 70.70656685     |              |             |             |             |
| MIR4697 MIR4697 | 0            | 1.015591254 | 0           | 0.942754225 |
| MIR4426 MIR4426 | 12183.43303  | 13842.50879 | 16466.0458  |             |
| 14733.36302     |              |             |             |             |
| TXLNGY TXLNGY   | 589.1997707  | 0           | 0           | 843.7650311 |
| MIR197 MIR197   | 5.856856567  | 2.031182508 | 6.249990271 |             |
| 3.771016899     |              |             |             |             |
| VTRNA2-1        | VTRNA2-1     | 3.51411394  | 2.031182508 | 0           |
| 3.771016899     |              |             |             |             |
| ZNF826P ZNF826P | 35.1411394   | 171.6349219 | 183.9282851 |             |
| 65.05004151     |              |             |             |             |
| LOC646471       | LOC646471    | 404.1231031 | 514.9047658 |             |
| 629.4633059     | 433.6669434  |             |             |             |
| LINC00441       | LINC00441    | 12.88508445 | 7.109138778 |             |
| 39.28565313     | 27.33987252  |             |             |             |

|                 |               |               |               |   |
|-----------------|---------------|---------------|---------------|---|
| RBM26-AS1       | RBM26-AS1     | 105.4234182   | 116.7929942   |   |
| 208.0353905     | 211.1769463   |               |               |   |
| STAG3L3 STAG3L3 | 443.9497278   | 354.4413477   | 520.534904    |   |
| 549.625713      |               |               |               |   |
| STAG3L2 STAG3L2 | 679.3953618   | 1093.791781   | 1253.569477   |   |
| 917.2998606     |               |               |               |   |
| STAG3L1 STAG3L1 | 609.113083    | 514.9047658   | 725.8917272   |   |
| 777.7722354     |               |               |               |   |
| LOC100287015    | LOC100287015  | 262.3871742   | 342.2542526   |   |
| 208.0353905     | 285.6545301   |               |               |   |
| LDLRAD4-AS1     | LDLRAD4-AS1   | 1.171371313   | 2.031182508   |   |
| 7.142846024     | 11.3130507    |               |               |   |
| HIST1H2AE       | HIST1H2AE     | 80.82462063   | 44.68601518   |   |
| 46.42849916     | 38.65292321   |               |               |   |
| TPH2 TPH2       | 0 1.015591254 | 0             | 0             |   |
| TTC3P1 TTC3P1   | 0 0           | 8.035701777   | 5.656525348   |   |
| TLR8-AS1        | TLR8-AS1      | 2.342742627   | 0 0           | 0 |
| FAM212A FAM212A | 22.25605496   | 20.31182508   | 123.2140939   |   |
| 41.48118589     |               |               |               |   |
| TAF4B TAF4B     | 842.2159744   | 1112.072423   | 2239.282229   |   |
| 2131.567302     |               |               |               |   |
| LOXL1 LOXL1     | 32.79839678   | 76.16934405   | 146.4283435   |   |
| 197.035633      |               |               |               |   |
| MTFMT MTFMT     | 1088.20395    | 1560.963757   | 1023.212693   |   |
| 966.3230803     |               |               |               |   |
| LINC00266-1     | LINC00266-1   | 0 0           | 1.785711506   |   |
| 3.771016899     |               |               |               |   |
| MAGI1-AS1       | MAGI1-AS1     | 1.171371313   | 0 0           |   |
| 0.942754225     |               |               |               |   |
| CSNK1G2-AS1     | CSNK1G2-AS1   | 4.685485254   | 2.031182508   |   |
| 0.892855753     | 5.656525348   |               |               |   |
| A2MP1 A2MP1     | 1.171371313   | 0 0 0         |               |   |
| MIR3155B        | MIR3155B      | 0 3.046773762 | 5.357134518   |   |
| 0.942754225     |               |               |               |   |
| PCAT19 PCAT19   | 2.342742627   | 28.43655511   | 12.49998054   | 0 |
| ADPGK-AS1       | ADPGK-AS1     | 606.7703404   | 843.9563321   |   |
| 950.891377      | 723.0924904   |               |               |   |
| LOC100506834    | LOC100506834  | 0 0           | 0 2.828262674 |   |
| MIR646HG        | MIR646HG      | 21.08468364   | 12.18709505   |   |
| 11.60712479     | 13.19855915   |               |               |   |
| FAM87A FAM87A   | 4.685485254   | 1.015591254   | 5.357134518   |   |
| 1.885508449     |               |               |               |   |
| PAPPA-AS1       | PAPPA-AS1     | 2.342742627   | 1.015591254   | 0 |
| 4.713771124     |               |               |               |   |
| GSN-AS1 GSN-AS1 | 36.31251072   | 41.63924142   | 32.14280711   |   |
| 41.48118589     |               |               |               |   |
| TMEM75 TMEM75   | 10.54234182   | 4.062365016   | 0 9.427542247 |   |
| C8orf49 C8orf49 | 0 3.046773762 | 0             | 0             |   |
| ACER1 ACER1     | 2.342742627   | 1.015591254   | 35.71423012   |   |
| 12.25580492     |               |               |               |   |

|              |              |             |             |             |             |             |
|--------------|--------------|-------------|-------------|-------------|-------------|-------------|
| PCAT1        | PCAT1        | 0           | 0           | 20.53568232 | 0.942754225 |             |
| RNF157-AS1   | RNF157-AS1   |             |             | 671.1957626 | 788.0988131 |             |
| 810.7130238  | 578.851094   |             |             |             |             |             |
| LOC100506082 | LOC100506082 |             |             | 3.51411394  | 1.015591254 | 0           |
| 0            |              |             |             |             |             |             |
| PMS2P3       | PMS2P3       | 304.5565415 |             | 264.0537261 | 532.1420288 |             |
| 393.1285117  |              |             |             |             |             |             |
| ZSCAN16-AS1  | ZSCAN16-AS1  |             |             | 378.3529342 | 479.3590719 |             |
| 593.7490758  | 468.5488497  |             |             |             |             |             |
| LOC100505658 | LOC100505658 |             |             | 32.79839678 | 16.24946006 |             |
| 6.249990271  | 30.16813519  |             |             |             |             |             |
| GALNT13      | GALNT13      | 0           | 1.015591254 | 0           | 0           |             |
| FMNL2        | FMNL2        | 10.54234182 |             | 11.17150379 | 70.53560449 |             |
| 16.96957604  |              |             |             |             |             |             |
| SLC16A12     | SLC16A12     |             |             | 0           | 1.015591254 | 24.99996108 |
| 0.942754225  |              |             |             |             |             |             |
| SULT1B1      | SULT1B1      | 100.737933  |             | 78.20052656 | 16.96425931 |             |
| 58.45076193  |              |             |             |             |             |             |
| TSPYL2       | TSPYL2       | 1282.651588 |             | 1268.473476 | 7826.773531 |             |
| 4651.549345  |              |             |             |             |             |             |
| ASB12        | ASB12        | 18.74194102 |             | 7.109138778 | 16.96425931 |             |
| 9.427542247  |              |             |             |             |             |             |
| COLEC12      | COLEC12      | 0           | 0           | 4.464278765 | 0           |             |
| LPCAT4       | LPCAT4       | 1174.885427 |             | 890.6735298 | 514.2849137 |             |
| 854.1353276  |              |             |             |             |             |             |
| SELM         | SELM         | 78.481878   |             | 193.9779295 | 2728.567181 |             |
| 1018.174563  |              |             |             |             |             |             |
| LIX1         | LIX1         | 0           | 0           | 10.71426904 | 10.37029647 |             |
| FBX039       | FBX039       | 7.028227881 |             | 2.031182508 | 36.60708587 |             |
| 25.45436407  |              |             |             |             |             |             |
| TULP2        | TULP2        | 0           | 2.031182508 | 8.035701777 | 0           |             |
| DAND5        | DAND5        | 0           | 2.031182508 | 0           | 0           |             |
| SVEP1        | SVEP1        | 0           | 0           | 0           | 0.942754225 |             |
| SNORD35B     | SNORD35B     |             |             | 59.73993699 | 63.98224901 |             |
| 122.3212382  | 83.905126    |             |             |             |             |             |
| UBE2Q2L      | UBE2Q2L      | 0           | 2.031182508 | 1.785711506 | 10.37029647 |             |
| ATXN7L2      | ATXN7L2      | 701.6514168 |             | 817.5509595 | 735.7131405 |             |
| 710.8366854  |              |             |             |             |             |             |
| RPL13AP5     | RPL13AP5     |             |             | 15138.80286 | 17682.45932 |             |
| 28408.88435  | 22872.16025  |             |             |             |             |             |
| TMEM86B      | TMEM86B      | 282.3004865 |             | 83.27848283 | 194.6425542 |             |
| 164.0392351  |              |             |             |             |             |             |
| TEKT2        | TEKT2        | 4.685485254 |             | 0           | 9.821413283 | 0           |
| MIR663AHG    | MIR663AHG    |             |             | 0           | 3.046773762 | 17.85711506 |
| 1.885508449  |              |             |             |             |             |             |
| FLJ42102     | FLJ42102     |             |             | 0           | 0           | 0.892855753 |
| LOC100129027 | LOC100129027 |             |             | 9.370970508 | 6.093547524 | 0           |
| 1.785711506  | 0            |             |             |             |             |             |
| ZNF212       | ZNF212       | 1030.806756 |             | 1133.39984  | 1328.569361 |             |
| 1219.923967  |              |             |             |             |             |             |

|                 |                 |             |             |             |             |
|-----------------|-----------------|-------------|-------------|-------------|-------------|
| XRN2            | XRN2            | 10648.93661 | 10550.97754 | 8122.308785 |             |
| 10593.72922     |                 |             |             |             |             |
| GNRHR2          | GNRHR2          | 946.4680213 | 1295.89444  | 1673.211681 |             |
| 1477.29587      |                 |             |             |             |             |
| C14orf79        | C14orf79        |             | 40.99799597 | 24.3741901  |             |
| 30.3570956      | 97.10368515     |             |             |             |             |
| LDLRAD3         | LDLRAD3         | 18.74194102 | 27.42096386 | 0           | 7.542033798 |
| SMIM14          | SMIM14          | 161.6492413 | 218.3521196 | 889.28433   |             |
| 399.7277913     |                 |             |             |             |             |
| RNASEK-C17orf49 | RNASEK-C17orf49 |             | 21388.06881 | 24780.4266  |             |
| 16820.50953     | 14384.54396     |             |             |             |             |
| LINC00943       | LINC00943       |             | 3.51411394  | 2.031182508 |             |
| 60.71419121     | 96.16093092     |             |             |             |             |
| HEATR4          | HEATR4          | 263.5585455 | 385.9246765 | 649.1061325 |             |
| 461.9495701     |                 |             |             |             |             |
| EZR-AS1         | EZR-AS1         | 2239.661951 | 3169.660304 | 1674.104537 |             |
| 1578.170572     |                 |             |             |             |             |
| PPIAL4F         | PPIAL4F         | 0           | 0           | 0.942754225 |             |
| LINC01132       | LINC01132       |             | 345.5545375 | 563.653146  |             |
| 133.928363      | 140.4703795     |             |             |             |             |
| ZFX-AS1         | ZFX-AS1         | 2.342742627 | 9.140321286 | 5.357134518 |             |
| 0.942754225     |                 |             |             |             |             |
| FLJ46284        | FLJ46284        |             | 0           | 0           | 5.357134518 |
| KIR2DL5B        | KIR2DL5B        |             | 0           | 0           | 2.678567259 |
| CYP3A7-CYP3AP1  | CYP3A7-CYP3AP1  |             | 12.88508445 | 7.109138778 |             |
| 11.60712479     | 18.85508449     |             |             |             |             |
| BATF2           | BATF2           | 0           | 0           | 52.67848943 | 14.14131337 |
| IQCD            | IQCD            | 43.3407386  | 37.5768764  | 35.71423012 |             |
| 62.22177883     |                 |             |             |             |             |
| PROX2           | PROX2           | 4.685485254 | 3.046773762 | 49.99992217 |             |
| 13.19855915     |                 |             |             |             |             |
| STYK1           | STYK1           | 5.856856567 | 42.65483267 | 33.92851862 |             |
| 26.39711829     |                 |             |             |             |             |
| TMEM240         | TMEM240         | 2.342742627 | 0           | 0           | 0           |
| TCERG1L         | TCERG1L         | 12.88508445 | 7.109138778 | 0           | 6.599279573 |
| N6AMT2          | N6AMT2          | 634.8832519 | 652.0095851 | 584.8205182 |             |
| 576.9655855     |                 |             |             |             |             |
| MRAP2           | MRAP2           | 0           | 0           | 6.249990271 | 0           |
| MARS2           | MARS2           | 942.9539073 | 1256.286381 | 1104.462567 |             |
| 1169.957993     |                 |             |             |             |             |
| EMC10           | EMC10           | 499.0041795 | 151.3230969 | 337.4994746 |             |
| 309.2233857     |                 |             |             |             |             |
| CASC5           | CASC5           | 4078.714913 | 2924.902812 | 866.0700804 |             |
| 1762.9504       |                 |             |             |             |             |
| CHRNA7          | CHRNA7          | 1.171371313 | 3.046773762 | 0           | 1.885508449 |
| DPH6-AS1        | DPH6-AS1        |             | 7.028227881 | 7.109138778 |             |
| 10.71426904     | 6.599279573     |             |             |             |             |
| LOC100506499    | LOC100506499    |             | 114.7943887 | 78.20052656 |             |
| 133.928363      | 134.8138541     |             |             |             |             |
| LOC102031319    | LOC102031319    |             | 1.171371313 | 6.093547524 |             |

|                 |              |                  |               |  |
|-----------------|--------------|------------------|---------------|--|
| 5.357134518     | 1.885508449  |                  |               |  |
| LOC100129973    | LOC100129973 | 45.68348122      | 45.70160643   |  |
| 125.8926612     | 135.7566084  |                  |               |  |
| TSPEAR TSPEAR   | 10.54234182  | 0 0              | 0             |  |
| SPDYE1 SPDYE1   | 60.9113083   | 42.65483267      | 83.92844078   |  |
| 65.99279573     |              |                  |               |  |
| KIAA1656        | KIAA1656     | 119.479874       | 118.8241767   |  |
| 64.28561422     | 106.5312274  |                  |               |  |
| KLHL6 KLHL6     | 2704.696363  | 1880.875003      | 3220.530701   |  |
| 3119.57373      |              |                  |               |  |
| STARD4-AS1      | STARD4-AS1   | 331.4980817      | 282.3343686   |  |
| 133.928363      | 214.9479632  |                  |               |  |
| MIR5190 MIR5190 | 0 0          | 0.892855753      | 0             |  |
| MIR5188 MIR5188 | 1.171371313  | 1.015591254      | 0 0           |  |
| MIR5187 MIR5187 | 79.65324932  | 85.30966534      | 36.60708587   |  |
| 34.88190631     |              |                  |               |  |
| MIR5094 MIR5094 | 2.342742627  | 1.015591254      | 0 1.885508449 |  |
| MIR5093 MIR5093 | 1.171371313  | 0 0 0            |               |  |
| MIR5091 MIR5091 | 2.342742627  | 0 7.142846024    | 1.885508449   |  |
| MIR5090 MIR5090 | 168.6774691  | 248.8198572      | 124.9998054   |  |
| 131.0428372     |              |                  |               |  |
| MIR5088 MIR5088 | 42.16936728  | 66.01343151      | 32.14280711   |  |
| 46.19495701     |              |                  |               |  |
| ELK2AP ELK2AP   | 1.171371313  | 0 0 0            |               |  |
| PFN1P2 PFN1P2   | 19.91331233  | 14.21827756      | 36.60708587   |  |
| 10.37029647     |              |                  |               |  |
| ANKRD20A12P     | ANKRD20A12P  | 2.342742627      | 0 0           |  |
| 1.885508449     |              |                  |               |  |
| LINC00659       | LINC00659    | 3.51411394       | 5.07795627    |  |
| 16.07140355     | 1.885508449  |                  |               |  |
| XKR3 XKR3       | 3.51411394   | 0 0 0            |               |  |
| ZNF792 ZNF792   | 920.6978524  | 959.7337351      | 1116.962547   |  |
| 881.4752001     |              |                  |               |  |
| SWSAP1 SWSAP1   | 392.40939    | 608.3391612      | 489.2849527   |  |
| 367.6741476     |              |                  |               |  |
| UBE3D UBE3D     | 204.9899799  | 319.911245       | 216.0710922   |  |
| 159.325464      |              |                  |               |  |
| KCTD21-AS1      | KCTD21-AS1   | 176.8770683      | 246.7886747   |  |
| 211.6068135     | 197.9783872  |                  |               |  |
| ERICH1-AS1      | ERICH1-AS1   | 0 5.07795627 0 0 |               |  |
| ZNF818P ZNF818P | 38.65525334  | 14.21827756      | 366.9637145   |  |
| 191.3791076     |              |                  |               |  |
| CMC1 CMC1       | 1224.083023  | 1412.687434      | 1139.283941   |  |
| 1209.55367      |              |                  |               |  |
| TEX19 TEX19     | 0 0          | 0 6.599279573    |               |  |
| DPP9 DPP9       | 6834.951614  | 7801.772014      | 4691.064126   |  |
| 4868.382816     |              |                  |               |  |
| SRRM2 SRRM2     | 27043.44951  | 20620.56482      | 28163.34902   |  |
| 27202.2304      |              |                  |               |  |
| ZNF22 ZNF22     | 1629.377497  | 1686.897073      | 2683.924394   |  |



|              |              |             |             |             |             |
|--------------|--------------|-------------|-------------|-------------|-------------|
| 2625.570516  |              |             |             |             |             |
| TNFAIP1      | TNFAIP1      | 2561.789063 | 3085.36623  | 2757.138565 |             |
| 2776.411192  |              |             |             |             |             |
| TTC3         | TTC3         | 3207.214656 | 2803.031861 | 4948.206583 |             |
| 5675.380433  |              |             |             |             |             |
| OTUD7A       | OTUD7A       | 23.42742627 | 50.7795627  | 169.6425931 |             |
| 244.1733442  |              |             |             |             |             |
| PIGW         | PIGW         | 1439.615344 | 1508.153012 | 1481.247694 |             |
| 1512.177776  |              |             |             |             |             |
| EXOC3L1      | EXOC3L1      | 5.856856567 | 11.17150379 | 0           | 14.14131337 |
| DRD4         | DRD4         | 1.171371313 | 1.015591254 | 0           | 1.885508449 |
| FAM101B      | FAM101B      | 2403.653935 | 1597.525043 | 1133.926806 |             |
| 1427.329896  |              |             |             |             |             |
| NOD2         | NOD2         | 324.4698538 | 291.4746899 | 1092.855442 |             |
| 680.6685502  |              |             |             |             |             |
| CR1L         | CR1L         | 2.342742627 | 0           | 0           | 9.427542247 |
| BST1         | BST1         | 23.42742627 | 41.63924142 | 0.892855753 |             |
| 19.79783872  |              |             |             |             |             |
| CS           | CS           | 15840.45427 | 18591.4135  | 11162.48262 |             |
| 12929.87419  |              |             |             |             |             |
| FAM195A      | FAM195A      | 924.2119663 | 1223.787461 | 1062.498346 |             |
| 931.441174   |              |             |             |             |             |
| PGBD4        | PGBD4        | 171.0202118 | 147.2607318 | 436.6064632 |             |
| 404.4415624  |              |             |             |             |             |
| MTPAP        | MTPAP        | 1675.060978 | 1167.929942 | 1247.319487 |             |
| 1263.290661  |              |             |             |             |             |
| DOK4         | DOK4         | 364.2964785 | 410.2988666 | 1026.784116 |             |
| 505.3162644  |              |             |             |             |             |
| TMEM183A     | TMEM183A     |             | 3790.55757  | 4962.178867 |             |
| 3902.672496  | 3613.576943  |             |             |             |             |
| RPAP2        | RPAP2        | 1774.62754  | 1968.21585  | 2128.568115 |             |
| 2023.150566  |              |             |             |             |             |
| RHOT2        | RHOT2        | 7091.481932 | 7691.072567 | 6549.096948 |             |
| 6636.989742  |              |             |             |             |             |
| CYB5R1       | CYB5R1       | 1299.050787 | 1488.856778 | 2763.388556 |             |
| 2005.238236  |              |             |             |             |             |
| ZNF57        | ZNF57        | 262.3871742 | 398.1117716 | 762.4988131 |             |
| 447.8082567  |              |             |             |             |             |
| ZNF283       | ZNF283       | 119.479874  | 119.839768  | 296.42811   |             |
| 294.1393181  |              |             |             |             |             |
| DNTTIP1      | DNTTIP1      | 3251.726766 | 4660.548265 | 2749.102864 |             |
| 2687.792295  |              |             |             |             |             |
| LOC100132781 | LOC100132781 |             | 4.685485254 | 5.07795627  | 0           |
| 0.942754225  |              |             |             |             |             |
| LINC00951    | LINC00951    |             | 2.342742627 | 0           | 17.85711506 |
| 4.713771124  |              |             |             |             |             |
| UG0898H09    | UG0898H09    |             | 0           | 0           | 8.92855753  |
| LM07DN       | LM07DN       | 0           | 0           | 0           | 1.785711506 |
| PRDM5        | PRDM5        | 8.199599194 | 16.24946006 | 13.3928363  |             |
| 5.656525348  |              |             |             |             |             |

|              |              |             |             |             |             |
|--------------|--------------|-------------|-------------|-------------|-------------|
| PCAT6        | PCAT6        | 11.71371313 | 4.062365016 | 15.1785478  |             |
| 9.427542247  |              |             |             |             |             |
| STARD7-AS1   | STARD7-AS1   | 1342.855053 | 1849.595304 | 2244.456671 |             |
| 1626.251038  |              |             |             |             |             |
| NS3BP        | NS3BP        | 63.25405093 | 16.24946006 | 53.57134518 |             |
| 143.2986422  |              |             |             |             |             |
| KLHL25       | KLHL25       | 374.8388203 | 417.4080054 | 773.2130821 |             |
| 741.9475749  |              |             |             |             |             |
| SNORA10      | SNORA10      | 85.51010588 | 109.6838554 | 166.0711701 |             |
| 130.100083   |              |             |             |             |             |
| NDFIP1       | NDFIP1       | 6300.806295 | 3942.525248 | 6412.490018 |             |
| 5724.403652  |              |             |             |             |             |
| MCEMP1       | MCEMP1       | 0           | 24.99996108 | 0           |             |
| 0            |              |             |             |             |             |
| TNFAIP6      | TNFAIP6      | 1.171371313 | 0           | 105.3569789 | 0.942754225 |
| 7.028227881  |              |             |             |             |             |
| TCHH         | TCHH         | 7.028227881 | 8.124730032 | 0           | 0.942754225 |
| TEP1         | TEP1         | 1288.508445 | 376.7843553 | 665.177536  |             |
| 507.2017729  |              |             |             |             |             |
| NLRP9        | NLRP9        | 0           | 1.015591254 | 12.49998054 | 7.542033798 |
| 0            |              |             |             |             |             |
| USP30-AS1    | USP30-AS1    | 903.5700221 | 439.2642425 | 410.2988666 |             |
| 817.3679128  |              |             |             |             |             |
| LINC00327    | LINC00327    | 1.171371313 | 1.171371313 | 0           | 0           |
| 0            |              |             |             |             | 0           |
| CTAGE7P      | CTAGE7P      | 7.028227881 | 3.046773762 | 2.678567259 |             |
| 7.542033798  |              |             |             |             |             |
| LOC285819    | LOC285819    | 44.64278765 | 99.56656164 | 69.06020528 |             |
| 95.2181767   |              |             |             |             |             |
| MIR5586      | MIR5586      | 2.342742627 | 1.015591254 | 4.464278765 | 0           |
| MIR5581      | MIR5581      | 30.45565415 | 4.062365016 | 6.249990271 |             |
| 45.25220279  |              |             |             |             |             |
| MIR664B      | MIR664B      | 4.685485254 | 0           | 9.821413283 | 0           |
| MIR4639      | MIR4639      | 1.171371313 | 2.031182508 | 11.60712479 |             |
| 7.542033798  |              |             |             |             |             |
| KDM7A        | KDM7A        | 2484.478556 | 1113.088014 | 1864.282812 |             |
| 1778.034468  |              |             |             |             |             |
| LINC00507    | LINC00507    | 0           | 0           | 0           | 2.828262674 |
| 0            |              |             |             |             |             |
| LOC101059948 | LOC101059948 | 0.942754225 | 0           | 0           | 8.92855753  |
| 0            |              |             |             |             |             |
| MIR4750      | MIR4750      | 11.71371313 | 5.07795627  | 14.28569205 |             |
| 8.484788022  |              |             |             |             |             |
| MINOS1P1     | MINOS1P1     | 26.78567259 | 70.28227881 | 15.23386881 |             |
| 62.22177883  |              |             |             |             |             |
| LYRM9        | LYRM9        | 74.96776406 | 77.18493531 | 324.1066384 |             |
| 244.1733442  |              |             |             |             |             |
| LOC644172    | LOC644172    | 0           | 0           | 3.046773762 | 8.92855753  |
| 0            |              |             |             |             |             |
| FSIP2        | FSIP2        | 1.171371313 | 0           | 0           | 1.885508449 |
| 0            |              |             |             |             |             |
| ERVFRD-1     | ERVFRD-1     | 12.25580492 | 2.342742627 | 0           | 0           |
| 0            |              |             |             |             |             |
| STARD5       | STARD5       | 176.8770683 | 207.1806158 | 485.7135296 |             |
| 397.8422828  |              |             |             |             |             |
| IPMK         | IPMK         | 536.4880616 | 355.4569389 | 516.0706253 |             |

|                 |               |  |             |             |             |
|-----------------|---------------|--|-------------|-------------|-------------|
| 582.6221109     |               |  |             |             |             |
| HOXB-AS1        | HOXB-AS1      |  | 38.65525334 |             | 17.26505132 |
| 24.99996108     | 51.85148236   |  |             |             |             |
| LOC100507283    | LOC100507283  |  | 8.199599194 |             | 12.18709505 |
| 58.9284797      | 45.25220279   |  |             |             |             |
| LOC101929505    | LOC101929505  |  | 4.685485254 |             | 7.109138778 |
| 19.64282657     | 0             |  |             |             |             |
| WBP2NL WBP2NL   | 17.5705697    |  | 3.046773762 |             | 18.74997081 |
| 16.96957604     |               |  |             |             |             |
| DTX3L DTX3L     | 7570.572799   |  | 5866.055083 |             | 15052.65514 |
| 13284.34978     |               |  |             |             |             |
| MPLKIP MPLKIP   | 1643.433953   |  | 1902.202419 |             | 1606.2475   |
| 1654.533664     |               |  |             |             |             |
| ZNF616 ZNF616   | 378.3529342   |  | 310.7709237 |             | 947.319954  |
| 904.1013015     |               |  |             |             |             |
| TRAM2-AS1       | TRAM2-AS1     |  | 26.94154021 |             | 12.18709505 |
| 100.8927001     | 49.96597391   |  |             |             |             |
| RBFADN RBFADN   | 0 0           |  | 0           | 1.885508449 |             |
| HAVCR2 HAVCR2   | 10640.73701   |  | 10076.69642 |             | 1569.640414 |
| 3602.263893     |               |  |             |             |             |
| TRIM11 TRIM11   | 2177.579272   |  | 2589.757698 |             | 2174.996614 |
| 2278.636961     |               |  |             |             |             |
| NEGR1 NEGR1     | 1.171371313   |  | 0 0         |             | 15.0840676  |
| COX8C COX8C     | 0 1.015591254 |  | 7.142846024 |             | 6.599279573 |
| RIMS4 RIMS4     | 0 3.046773762 |  | 0           |             | 0.942754225 |
| TMEM52 TMEM52   | 9.370970508   |  | 11.17150379 |             | 61.60704696 |
| 10.37029647     |               |  |             |             |             |
| RPL27A RPL27A   | 11719.56999   |  | 12671.53208 |             | 20055.32592 |
| 16527.42431     |               |  |             |             |             |
| RPL26 RPL26     | 7269.530371   |  | 7421.940885 |             | 8000.880403 |
| 7655.164305     |               |  |             |             |             |
| PEBP4 PEBP4     | 0 0           |  | 7.142846024 |             | 0           |
| CPLX4 CPLX4     | 0 0           |  | 0           | 2.828262674 |             |
| ENHO ENHO       | 1.171371313   |  | 8.124730032 |             | 5.357134518 |
| 14.14131337     |               |  |             |             |             |
| MED12L MED12L   | 70.28227881   |  | 23.35859884 |             | 75.89273901 |
| 35.82466054     |               |  |             |             |             |
| GAPT GAPT       | 0 0           |  | 0           | 12.25580492 |             |
| KIF7 KIF7       | 124.1653592   |  | 118.8241767 |             | 67.85703723 |
| 52.79423658     |               |  |             |             |             |
| MGAT5 MGAT5     | 440.4356139   |  | 409.2832754 |             | 398.2136659 |
| 601.4771954     |               |  |             |             |             |
| CEP97 CEP97     | 910.1555106   |  | 966.8428739 |             | 883.0343397 |
| 1051.170961     |               |  |             |             |             |
| LAMTOR1 LAMTOR1 | 4540.235211   |  | 4029.866096 |             | 3670.530001 |
| 3173.31072      |               |  |             |             |             |
| PAK1IP1 PAK1IP1 | 2066.298997   |  | 2167.271736 |             | 2302.674987 |
| 2158.907175     |               |  |             |             |             |
| TTC23L TTC23L   | 4.685485254   |  | 4.062365016 |             | 12.49998054 |
| 3.771016899     |               |  |             |             |             |

|              |              |             |             |             |             |             |
|--------------|--------------|-------------|-------------|-------------|-------------|-------------|
| MIR6829      | MIR6829      | 2.342742627 | 0           | 0           | 0           |             |
| LINC00417    | LINC00417    |             | 0           | 0           | 0           | 1.885508449 |
| SMIM2-AS1    | SMIM2-AS1    |             | 0           | 2.031182508 |             | 3.571423012 |
|              |              | 3.771016899 |             |             |             |             |
| TPRG1        | TPRG1        | 534.1453189 | 352.4101652 |             | 89.2855753  |             |
|              |              | 388.4147406 |             |             |             |             |
| GZMH         | GZMH         | 231.9315201 | 121.8709505 |             | 444.642165  |             |
|              |              | 328.0784702 |             |             |             |             |
| CCDC137      | CCDC137      | 2507.905982 | 3540.351112 |             | 2491.067551 |             |
|              |              | 2452.103738 |             |             |             |             |
| ZNF32-AS2    | ZNF32-AS2    |             | 115.96576   |             | 165.5413744 |             |
|              |              | 435.7136075 |             |             |             |             |
| LINC-ROR     | LINC-ROR     |             | 1.171371313 | 0           | 0           | 0           |
| EGFR-AS1     | EGFR-AS1     |             | 0           | 0           | 0           | 2.828262674 |
| LOC100288866 | LOC100288866 |             | 0           | 0           | 5.357134518 | 0           |
| LOC100507506 | LOC100507506 |             | 2.342742627 |             | 2.031182508 |             |
|              |              | 9.821413283 |             |             |             |             |
| PTENP1-AS    | PTENP1-AS    |             | 0           | 0           | 0.892855753 | 0           |
| SIGLEC17P    | SIGLEC17P    |             | 11.71371313 |             | 43.67042392 |             |
|              |              | 10.71426904 |             |             |             |             |
| ALG14        | ALG14        | 468.5485254 | 585.9961536 |             | 336.6066189 |             |
|              |              | 238.5168189 |             |             |             |             |
| IMMP1L       | IMMP1L       | 791.8470079 | 774.8961268 |             | 674.9989493 |             |
|              |              | 571.3090602 |             |             |             |             |
| JAG1         | JAG1         | 25.7701689  | 33.51451138 |             | 125.8926612 |             |
|              |              | 14.14131337 |             |             |             |             |
| MISP         | MISP         | 7.028227881 | 2.031182508 |             | 1.785711506 |             |
|              |              | 0.942754225 |             |             |             |             |
| CXorf38      | CXorf38      | 1376.361293 | 2046.416377 |             | 2797.317074 |             |
|              |              | 1838.370738 |             |             |             |             |
| CENPV        | CENPV        | 746.1635267 | 1328.39336  |             | 721.4274484 |             |
|              |              | 695.7526178 |             |             |             |             |
| TMEM44-AS1   | TMEM44-AS1   |             | 230.7601488 |             | 259.991361  |             |
|              |              | 275.8924277 |             |             |             |             |
| RMDN2-AS1    | RMDN2-AS1    |             | 0           | 0           | 2.678567259 |             |
|              |              | 2.828262674 |             |             |             |             |
| PGAM1P5      | PGAM1P5      | 0           | 0           | 0.892855753 | 1.885508449 |             |
| LOC100996255 | LOC100996255 |             | 2.342742627 |             | 8.124730032 |             |
|              |              | 158.928324  |             |             |             |             |
| FLJ31104     | FLJ31104     |             | 10.54234182 |             | 15.23386881 |             |
|              |              | 34.82137437 |             |             |             |             |
| SNORD124     | SNORD124     |             | 8.199599194 |             | 2.031182508 |             |
|              |              | 5.357134518 |             |             |             |             |
| SNORD121B    | SNORD121B    |             | 2.342742627 | 0           | 0           |             |
|              |              | 1.885508449 |             |             |             |             |
| LOC729930    | LOC729930    |             | 1.171371313 | 0           | 0           |             |
|              |              | 8.484788022 |             |             |             |             |
| SSTR2        | SSTR2        | 9.370970508 | 11.17150379 |             | 32.14280711 | 0           |
| FLJ35934     | FLJ35934     |             | 1.171371313 | 0           | 2.678567259 |             |
|              |              | 0.942754225 |             |             |             |             |

|              |              |             |             |             |             |
|--------------|--------------|-------------|-------------|-------------|-------------|
| DCAF7        | DCAF7        | 12272.45725 | 11309.62421 | 8770.522062 |             |
| 9806.529445  |              |             |             |             |             |
| MUC19        | MUC19        | 0           | 0           | 2.678567259 | 0.942754225 |
| EN04         | EN04         | 5.856856567 | 3.046773762 | 8.92855753  |             |
| 4.713771124  |              |             |             |             |             |
| LOC100289580 | LOC100289580 |             | 1260.395533 | 692.6332353 |             |
| 299.999533   | 421.4111384  |             |             |             |             |
| PRKXP1       | PRKXP1       | 338.5263096 | 135.0736368 | 527.67775   |             |
| 499.6597391  |              |             |             |             |             |
| KLHL17       | KLHL17       | 583.3429141 | 330.0671576 | 498.2135102 |             |
| 527.9423658  |              |             |             |             |             |
| BCL6B        | BCL6B        | 87.85284851 | 217.3365284 | 17.85711506 |             |
| 31.11088942  |              |             |             |             |             |
| KIAA1147     | KIAA1147     |             | 1662.175894 | 2639.521669 |             |
| 2891.066928  | 2984.759875  |             |             |             |             |
| IL36A        | IL36A        | 8.199599194 | 3.046773762 | 2.678567259 | 0           |
| ZNF599       | ZNF599       | 140.5645576 | 150.3075056 | 253.5710339 |             |
| 147.0696591  |              |             |             |             |             |
| DNASE1       | DNASE1       | 941.782536  | 862.2369747 | 960.7127903 |             |
| 869.2193952  |              |             |             |             |             |
| F2R          | F2R          | 6730.699567 | 2555.227595 | 887.4986185 |             |
| 3042.267883  |              |             |             |             |             |
| SYS1-DBNDD2  | SYS1-DBNDD2  |             | 488.4618377 | 740.3660242 |             |
| 1560.711856  | 955.0100296  |             |             |             |             |
| USP32P1      | USP32P1      | 64.42542224 | 12.18709505 | 49.99992217 |             |
| 85.79063445  |              |             |             |             |             |
| LINC01118    | LINC01118    |             | 0           | 2.031182508 | 0           |
| LINC00885    | LINC00885    |             | 0           | 5.07795627  | 0           |
| 2.828262674  |              |             |             |             |             |
| MIR2861      | MIR2861      | 5.856856567 | 1.015591254 | 3.571423012 |             |
| 4.713771124  |              |             |             |             |             |
| MIR4282      | MIR4282      | 0           | 1.015591254 | 0           | 0           |
| GTF3C2-AS1   | GTF3C2-AS1   |             | 1639.919839 | 2185.552379 |             |
| 1595.533231  | 1599.853919  |             |             |             |             |
| LINC00671    | LINC00671    |             | 0           | 1.015591254 | 2.678567259 |
| 0            |              |             |             |             |             |
| AKR1CL1      | AKR1CL1      | 10.54234182 | 1.015591254 | 20.53568232 |             |
| 2.828262674  |              |             |             |             |             |
| RBM12B-AS1   | RBM12B-AS1   |             | 49.19759517 | 55.85751897 |             |
| 104.4641231  | 89.56165135  |             |             |             |             |
| PRORS1P      | PRORS1P      |             | 38.65525334 | 51.79515396 |             |
| 77.67845051  | 159.325464   |             |             |             |             |
| FLJ26850     | FLJ26850     |             | 0           | 0           | 11.60712479 |
| 8.484788022  |              |             |             |             |             |
| LOC101926987 | LOC101926987 |             | 18.74194102 | 16.24946006 |             |
| 49.99992217  | 37.71016899  |             |             |             |             |
| SNORA8       | SNORA8       | 24.59879758 | 13.2026863  | 27.67852834 |             |
| 23.56885562  |              |             |             |             |             |
| LOC285626    | LOC285626    |             | 9.370970508 | 12.18709505 | 0           |
| 1.885508449  |              |             |             |             |             |

|                 |             |             |             |
|-----------------|-------------|-------------|-------------|
| SDHAP2 SDHAP2   | 1794.540852 | 1432.999259 | 1581.247539 |
| 1594.197394     |             |             |             |
| SDHAP3 SDHAP3   | 58.56856567 | 49.76397145 | 114.2855364 |
| 150.840676      |             |             |             |
| DNM1P46 DNM1P46 | 80.82462063 | 13.2026863  | 51.78563368 |
| 43.36669434     |             |             |             |
| DEFB109P1       | DEFB109P1   | 0           | 2.031182508 |
| 1.885508449     |             |             | 0           |
| CETN4P CETN4P   | 28.11291152 | 10.15591254 | 30.3570956  |
| 33.93915209     |             |             |             |
| DANCR DANCR     | 995.6656164 | 1356.829915 | 907.1414451 |
| 784.371515      |             |             |             |
| ADAT2 ADAT2     | 906.6413966 | 745.4439805 | 407.1422234 |
| 512.8582982     |             |             |             |
| ZNF396 ZNF396   | 38.65525334 | 24.3741901  | 46.42849916 |
| 106.5312274     |             |             |             |
| PDIA4 PDIA4     | 16111.04105 | 18383.21729 | 15275.86908 |
| 14260.1004      |             |             |             |
| DDX12P DDX12P   | 1072.976123 | 591.0741099 | 474.9992606 |
| 515.6865609     |             |             |             |
| FAM66D FAM66D   | 14.05645576 | 14.21827756 | 34.82137437 |
| 43.36669434     |             |             |             |
| FAM66E FAM66E   | 0           | 1.015591254 | 0.892855753 |
| FAM66B FAM66B   | 29.28428284 | 40.62365016 | 2.828262674 |
| 56.56525348     |             |             | 76.78559476 |
| PITHD1 PITHD1   | 2374.369652 | 3027.477528 | 4060.707965 |
| 3184.623771     |             |             |             |
| TMEM229B        | TMEM229B    | 412.3227023 | 375.768764  |
| 1330.355072     | 1073.797062 |             |             |
| C20orf196       | C20orf196   | 768.4195816 | 795.2079519 |
| 563.3919802     | 709.8939312 |             |             |
| BPTF BPTF       | 2468.079357 | 1311.128309 | 1648.21172  |
| 2228.670987     |             |             |             |
| UAP1L1 UAP1L1   | 795.3611218 | 1158.789621 | 2066.068213 |
| 969.151343      |             |             |             |
| WDR53 WDR53     | 1053.062811 | 1493.934735 | 1323.212226 |
| 1226.523246     |             |             |             |
| TMED10 TMED10   | 13038.53409 | 14708.80813 | 16245.51043 |
| 16086.21534     |             |             |             |
| TMEM61 TMEM61   | 0           | 1.015591254 | 0           |
| NEFL NEFL       | 5.856856567 | 32.49892013 | 7.542033798 |
| 225.3182597     |             |             | 424.9993384 |
| UBALD2 UBALD2   | 1368.161694 | 401.1585454 | 225.8925055 |
| 233.8030477     |             |             |             |
| NRADDP NRADDP   | 2.342742627 | 5.07795627  | 0.892855753 |
| 0.942754225     |             |             |             |
| CROCCP3 CROCCP3 | 107.7661608 | 52.81074521 | 237.4996303 |
| 162.1537267     |             |             |             |
| RRN3P1 RRN3P1   | 335.0121956 | 54.84192772 | 177.6782949 |
| 390.300249      |             |             |             |

|                 |               |             |               |   |
|-----------------|---------------|-------------|---------------|---|
| ANKRD18DP       | ANKRD18DP     | 7.028227881 | 10.15591254   |   |
| 140.1783532     | 25.45436407   |             |               |   |
| EP400NL EP400NL | 178.0484396   | 136.089228  | 142.8569205   |   |
| 146.1269048     |               |             |               |   |
| MIR155 MIR155   | 285.8146005   | 253.8978135 | 681.2489396   |   |
| 782.4860065     |               |             |               |   |
| LOC729603       | LOC729603     | 38.65525334 | 34.53010264   |   |
| 90.17843106     | 52.79423658   |             |               |   |
| HNRNPA3 HNRNPA3 | 6431.999882   | 5243.497645 | 4383.921747   |   |
| 5746.087        |               |             |               |   |
| SCARNA17        | SCARNA17      | 57.39719436 | 55.85751897   |   |
| 389.2851083     | 259.2574118   |             |               |   |
| RRN3P2 RRN3P2   | 402.9517318   | 416.3924142 | 454.4635783   |   |
| 402.556054      |               |             |               |   |
| DPY19L2P1       | DPY19L2P1     | 0 0         | 0.892855753   | 0 |
| RECQL4 RECQL4   | 5435.162894   | 4672.73536  | 2518.746079   |   |
| 3284.555719     |               |             |               |   |
| PIN4P1 PIN4P1   | 146.4214142   | 63.98224901 | 10.71426904   |   |
| 66.93554995     |               |             |               |   |
| LOC344967       | LOC344967     | 134.707701  | 111.7150379   |   |
| 77.67845051     | 74.47758375   |             |               |   |
| LOC100507377    | LOC100507377  | 4.685485254 | 0 0           |   |
| 13.19855915     |               |             |               |   |
| LINC00707       | LINC00707     | 0 0         | 0.892855753   | 0 |
| SCARNA12        | SCARNA12      | 118.3085027 | 101.5591254   |   |
| 163.3926028     | 152.7261844   |             |               |   |
| MIR223 MIR223   | 2.342742627   | 7.109138778 | 0 0           |   |
| MIR941-1        | MIR941-1      | 0 0         | 0 1.885508449 |   |
| LINC00298       | LINC00298     | 1.171371313 | 0 0           |   |
| 1.885508449     |               |             |               |   |
| FLJ45079        | FLJ45079      | 4.685485254 | 3.046773762   |   |
| 8.035701777     | 5.656525348   |             |               |   |
| ZSCAN4 ZSCAN4   | 0 0           | 1.785711506 | 0             |   |
| CRIPAK CRIPAK   | 37.48388203   | 79.21611782 | 80.35701777   |   |
| 71.64932108     |               |             |               |   |
| PDE12 PDE12     | 3955.720926   | 4546.802044 | 3455.351764   |   |
| 3521.187029     |               |             |               |   |
| PIWIL4 PIWIL4   | 7.028227881   | 19.29623383 | 103.5712674   |   |
| 28.28262674     |               |             |               |   |
| P4HTM P4HTM     | 1759.399713   | 2048.447559 | 1701.783065   |   |
| 2043.891159     |               |             |               |   |
| TMEM37 TMEM37   | 0 4.062365016 | 0           | 0             |   |
| SLC25A16        | SLC25A16      | 592.7138846 | 563.653146    |   |
| 291.0709755     | 456.2930448   |             |               |   |
| LINC00574       | LINC00574     | 1.171371313 | 6.093547524   | 0 |
| 0.942754225     |               |             |               |   |
| LOC101928580    | LOC101928580  | 0 0         | 0 1.885508449 |   |
| LOC389906       | LOC389906     | 335.0121956 | 762.7090318   |   |
| 958.9270788     | 433.6669434   |             |               |   |
| LOC643201       | LOC643201     | 1.171371313 | 0 11.60712479 |   |

|              |              |             |             |             |             |
|--------------|--------------|-------------|-------------|-------------|-------------|
|              |              | 1.885508449 |             |             |             |
| LINC00884    | LINC00884    |             | 78.481878   |             | 124.9177242 |
| 39.28565313  | 53.73699081  |             |             |             |             |
| TUSC5        | TUSC5        | 1.171371313 | 57.88870148 | 0           | 2.828262674 |
| NMUR1        | NMUR1        | 64.42542224 | 12.18709505 | 0           | 0           |
| CTR9         | CTR9         | 9273.746689 | 10347.85929 |             | 9814.270437 |
| 10243.02465  |              |             |             |             |             |
| POLH         | POLH         | 4111.51331  | 4720.468149 |             | 3488.387427 |
| 2517.15378   |              |             |             |             |             |
| KIR2DL5A     | KIR2DL5A     |             | 0           | 0           | 2.678567259 |
| C19orf70     | C19orf70     |             | 1696.145662 |             | 2247.503445 |
| 2394.63913   | 1829.88595   |             |             |             |             |
| C15orf52     | C15orf52     |             | 0           | 0           | 2.678567259 |
| 9.427542247  |              |             |             |             |             |
| GPR153       | GPR153       | 53.88308042 | 81.24730032 |             | 55.35705669 |
| 38.65292321  |              |             |             |             |             |
| KIAA1211L    | KIAA1211L    |             | 32.79839678 |             | 54.84192772 |
| 54.46420093  | 32.99639787  |             |             |             |             |
| LINC00381    | LINC00381    |             | 0           | 1.015591254 | 0           |
| 7.542033798  |              |             |             |             |             |
| NLRP12       | NLRP12       | 0           | 1.015591254 | 0           | 0           |
| DNAH11       | DNAH11       | 870.3288859 | 1488.856778 |             | 639.2847192 |
| 494.945968   |              |             |             |             |             |
| SNORD46      | SNORD46      | 23.42742627 | 22.34300759 |             | 56.24991244 |
| 16.96957604  |              |             |             |             |             |
| SNORD55      | SNORD55      | 53.88308042 | 60.93547524 |             | 116.0712479 |
| 57.50800771  |              |             |             |             |             |
| SNORA68      | SNORA68      | 29.28428284 | 55.85751897 |             | 43.7499319  |
| 36.76741476  |              |             |             |             |             |
| MFSD8        | MFSD8        | 1226.425765 | 1108.010058 |             | 1448.212031 |
| 1512.177776  |              |             |             |             |             |
| CATSPERD     | CATSPERD     |             | 5.856856567 |             | 2.031182508 |
| 8.92855753   | 4.713771124  |             |             |             |             |
| TMEM110      | TMEM110      | 4400.842025 | 4463.523562 |             | 2544.638896 |
| 3413.713048  |              |             |             |             |             |
| LHFPL4       | LHFPL4       | 16.39919839 | 14.21827756 |             | 58.03562395 |
| 28.28262674  |              |             |             |             |             |
| STK32C       | STK32C       | 247.1593471 | 396.0805891 |             | 580.3562395 |
| 418.5828758  |              |             |             |             |             |
| OGFR-AS1     | OGFR-AS1     |             | 7.028227881 |             | 10.15591254 |
| 18.74997081  | 24.51160984  |             |             |             |             |
| OSGEPL1-AS1  | OSGEPL1-AS1  |             | 30.45565415 |             | 13.2026863  |
| 31.24995136  | 34.88190631  |             |             |             |             |
| CDC42P3      | CDC42P3      | 0           | 3.046773762 | 0           | 1.885508449 |
| LOC101409256 | LOC101409256 |             | 2.342742627 |             | 1.015591254 |
|              |              | 18.85508449 |             |             | 0           |
| SHC2         | SHC2         | 0           | 2.031182508 | 0           | 2.828262674 |
| C2orf69      | C2orf69      | 1507.55488  | 1314.175083 |             | 1133.033951 |
| 1716.755443  |              |             |             |             |             |
| SPATA24      | SPATA24      | 209.6754651 | 241.7107185 |             | 150.8926223 |



|              |              |             |             |             |             |
|--------------|--------------|-------------|-------------|-------------|-------------|
| 98.04643937  |              |             |             |             |             |
| ZFP36L2      | ZFP36L2      | 7412.437672 | 5450.67826  | 12117.83828 |             |
| 11498.77328  |              |             |             |             |             |
| DAZAP1       | DAZAP1       | 1174.885427 | 905.9073986 | 501.7849332 |             |
| 971.0368515  |              |             |             |             |             |
| RAB15        | RAB15        | 904.298654  | 690.6020528 | 768.7488034 |             |
| 978.5788853  |              |             |             |             |             |
| LINC00506    | LINC00506    | 1.171371313 | 0           | 0.892855753 |             |
| 0            |              |             |             |             |             |
| LAMTOR5-AS1  | LAMTOR5-AS1  | 45.68348122 | 34.53010264 |             |             |
| 31.24995136  | 24.51160984  |             |             |             |             |
| LOC387810    | LOC387810    | 0           | 0           | 10.71426904 |             |
| 4.713771124  |              |             |             |             |             |
| TMIGD1       | TMIGD1       | 1.171371313 | 0           | 0           |             |
| PGBD3        | PGBD3        | 368.9819637 | 450.9225168 | 248.2138993 |             |
| 431.7814349  |              |             |             |             |             |
| LINC00678    | LINC00678    | 1.171371313 | 0           | 0           | 0           |
| C16orf74     | C16orf74     | 58.56856567 | 56.87311023 |             |             |
| 22.32139383  | 44.30944856  |             |             |             |             |
| EFNB2        | EFNB2        | 9.370970508 | 8.124730032 | 23.21424958 |             |
| 13.19855915  |              |             |             |             |             |
| FABP3        | FABP3        | 15.22782708 | 10.15591254 | 29.46423985 |             |
| 25.45436407  |              |             |             |             |             |
| SSPO         | SSPO         | 1.171371313 | 0           | 0           |             |
| DEGS2        | DEGS2        | 3.51411394  | 2.031182508 | 24.99996108 |             |
| 17.91233027  |              |             |             |             |             |
| ZNF728       | ZNF728       | 0           | 0           | 0.892855753 | 0           |
| LOC100506639 | LOC100506639 | 226.0746635 | 209.2117983 |             |             |
| 868.7486477  | 371.4451645  |             |             |             |             |
| LOC101928093 | LOC101928093 | 0           | 2.031182508 | 0           | 0           |
| XYLT1        | XYLT1        | 667.6816487 | 416.3924142 | 432.1421845 |             |
| 482.6901631  |              |             |             |             |             |
| EFTUD1P1     | EFTUD1P1     | 7.028227881 | 12.18709505 |             | 0           |
| 1.885508449  |              |             |             |             |             |
| SH2D1B       | SH2D1B       | 0           | 0           | 2.678567259 | 0           |
| SLC5A8       | SLC5A8       | 0           | 0           | 5.357134518 | 0           |
| CCDC57       | CCDC57       | 614.9699396 | 609.3547524 | 455.356434  |             |
| 603.3627038  |              |             |             |             |             |
| MIR8075      | MIR8075      | 0           | 1.015591254 | 0           | 0           |
| MIR6882      | MIR6882      | 19.91331233 | 24.3741901  | 11.60712479 |             |
| 15.0840676   |              |             |             |             |             |
| MIR6881      | MIR6881      | 0           | 0           | 0.942754225 |             |
| MIR6880      | MIR6880      | 1.171371313 | 1.015591254 | 1.785711506 |             |
| 1.885508449  |              |             |             |             |             |
| MIR6877      | MIR6877      | 5.856856567 | 18.28064257 | 16.07140355 |             |
| 6.599279573  |              |             |             |             |             |
| MIR6875      | MIR6875      | 2.342742627 | 2.031182508 | 1.785711506 |             |
| 1.885508449  |              |             |             |             |             |
| MIR6874      | MIR6874      | 1.171371313 | 0           | 2.678567259 | 2.828262674 |
| MIR8066      | MIR8066      | 0           | 1.015591254 | 0           | 0           |

|              |              |             |             |             |             |
|--------------|--------------|-------------|-------------|-------------|-------------|
| MIR6871      | MIR6871      | 11.71371313 | 11.17150379 | 8.035701777 |             |
| 33.93915209  |              |             |             |             |             |
| MIR6869      | MIR6869      | 17.5705697  | 12.18709505 | 7.142846024 |             |
| 7.542033798  |              |             |             |             |             |
| MIR6868      | MIR6868      | 2.342742627 | 2.031182508 | 1.785711506 |             |
| 2.828262674  |              |             |             |             |             |
| RAB39B       | RAB39B       | 824.6454047 | 862.2369747 | 1351.78361  |             |
| 1214.267441  |              |             |             |             |             |
| TMEM95       | TMEM95       | 1.171371313 | 0           | 2.678567259 | 0           |
| LOC100505625 | LOC100505625 |             | 1.171371313 | 0           | 0           |
| LOC101559451 | LOC101559451 |             | 18.74194102 | 24.3741901  | 0           |
| 21.42853807  | 19.79783872  |             |             |             |             |
| HKR1         | HKR1         | 754.3631259 | 839.8939671 | 1363.390735 |             |
| 1607.395953  |              |             |             |             |             |
| ARL10        | ARL10        | 81.99599194 | 64.99784026 | 57.14276819 |             |
| 76.3630922   |              |             |             |             |             |
| RNF216-IT1   | RNF216-IT1   |             | 8.199599194 | 7.109138778 |             |
| 14.28569205  | 7.542033798  |             |             |             |             |
| GLUD1P3      | GLUD1P3      | 193.2762667 | 161.4790094 | 185.7139966 |             |
| 284.7117759  |              |             |             |             |             |
| SAPCD2       | SAPCD2       | 2663.698367 | 2443.512557 | 433.927896  |             |
| 766.4591847  |              |             |             |             |             |
| EIF2AK4      | EIF2AK4      | 2222.091382 | 2028.135734 | 1822.318592 |             |
| 2406.851536  |              |             |             |             |             |
| ZNF878       | ZNF878       | 3.51411394  | 27.42096386 | 62.49990271 |             |
| 39.59567744  |              |             |             |             |             |
| PLIN4        | PLIN4        | 73.79639275 | 54.84192772 | 58.03562395 |             |
| 61.27902461  |              |             |             |             |             |
| LRRC26       | LRRC26       | 15.22782708 | 10.15591254 | 0           | 2.828262674 |
| SLX4IP       | SLX4IP       | 324.4698538 | 387.955859  | 220.535371  |             |
| 352.59008    |              |             |             |             |             |
| ASB16-AS1    | ASB16-AS1    |             | 727.4215857 | 678.4149577 |             |
| 885.712907   | 962.5520634  |             |             |             |             |
| TAF1A-AS1    | TAF1A-AS1    |             | 32.79839678 | 25.38978135 |             |
| 88.39271955  | 42.42394011  |             |             |             |             |
| TP53TG3D     | TP53TG3D     |             | 1.171371313 | 5.07795627  |             |
| 8.92855753   | 20.74059294  |             |             |             |             |
| LOC101929372 | LOC101929372 |             | 0           | 0           | 2.828262674 |
| MIR5703      | MIR5703      | 91.36696245 | 111.7150379 | 133.0355072 |             |
| 104.6457189  |              |             |             |             |             |
| MIR5690      | MIR5690      | 1.171371313 | 2.031182508 | 4.464278765 |             |
| 10.37029647  |              |             |             |             |             |
| MIR5687      | MIR5687      | 0           | 0.892855753 | 0           |             |
| MIR5685      | MIR5685      | 2.342742627 | 0           | 0           | 0           |
| MIR548AX     | MIR548AX     |             | 0           | 0           | 0.942754225 |
| C10orf115    | C10orf115    |             | 1.171371313 | 0           | 0           |
| STAG3L5P     | STAG3L5P     |             | 316.2702546 | 236.6327622 | 0           |
| 452.6778668  | 454.4075363  |             |             |             |             |
| ST3GAL6-AS1  | ST3GAL6-AS1  |             | 1.171371313 | 3.046773762 | 0           |
| 0            |              |             |             |             |             |

|              |              |             |             |             |             |   |
|--------------|--------------|-------------|-------------|-------------|-------------|---|
| MIR5587      | MIR5587      | 1.171371313 | 1.015591254 | 0           | 0.942754225 |   |
| C3orf67      | C3orf67      | 65.59679355 | 61.9510665  |             | 13.3928363  |   |
|              |              | 76.3630922  |             |             |             |   |
| KANK3        | KANK3        | 325.6412251 | 487.4838019 |             | 246.4281878 |   |
|              |              | 233.8030477 |             |             |             |   |
| MMS22L       | MMS22L       | 2273.631719 | 1682.834708 |             | 719.6417369 |   |
|              |              | 1133.190578 |             |             |             |   |
| KLHL6-AS1    | KLHL6-AS1    |             | 19.91331233 |             | 3.046773762 |   |
|              |              | 8.035701777 |             |             |             |   |
| C16orf3      | C16orf3      | 1.171371313 | 0           | 2.678567259 | 12.25580492 |   |
| KLHDC8B      | KLHDC8B      | 63.25405093 | 74.13816155 |             | 245.5353321 |   |
|              |              | 148.0124133 |             |             |             |   |
| KLRG2        | KLRG2        | 2.342742627 | 15.23386881 |             | 16.96425931 |   |
|              |              | 0.942754225 |             |             |             |   |
| SLC25A42     | SLC25A42     |             | 1322.478213 |             | 1344.64282  |   |
|              |              | 1209.819545 |             |             |             |   |
| ALG1L9P      | ALG1L9P      | 55.05445173 | 70.07579653 |             | 98.21413283 |   |
|              |              | 94.27542247 |             |             |             |   |
| DIAPH3-AS2   | DIAPH3-AS2   |             | 3.51411394  | 0           | 0           |   |
|              |              | 0.942754225 |             |             |             |   |
| ANKRD20A19P  | ANKRD20A19P  |             | 0           | 0           | 1.785711506 |   |
|              |              | 0.942754225 |             |             |             |   |
| CNKSR3       | CNKSR3       | 0           | 6.093547524 | 20.53568232 | 0           |   |
| LRRRC74A     | LRRRC74A     | 0           | 0           | 2.678567259 | 0           |   |
| NUDT18       | NUDT18       | 719.2219865 | 800.2859082 |             | 701.7846219 |   |
|              |              | 560.9387637 |             |             |             |   |
| NARR         | NARR         | 126.5081019 | 367.644034  |             | 313.3923693 |   |
|              |              | 131.9855915 |             |             |             |   |
| ZC3H6        | ZC3H6        | 149.9355281 | 149.2919143 |             | 507.1420677 |   |
|              |              | 525.1141032 |             |             |             |   |
| MANEA-AS1    | MANEA-AS1    |             | 79.65324932 |             | 38.59246765 |   |
|              |              | 84.82129654 |             |             |             |   |
| LINC00539    | LINC00539    |             | 426.3791581 |             | 354.4413477 |   |
|              |              | 99.99984434 |             |             |             |   |
| FRY-AS1      | FRY-AS1      | 9.370970508 | 13.2026863  |             | 32.14280711 |   |
|              |              | 23.56885562 |             |             |             |   |
| FT0-IT1      | FT0-IT1      | 25.7701689  | 31.48332888 |             | 21.42853807 |   |
|              |              | 32.99639787 |             |             |             |   |
| MYCBP2-AS1   | MYCBP2-AS1   |             | 111.2802748 |             | 50.7795627  |   |
|              |              | 154.4640453 |             |             |             |   |
| LOC100996385 | LOC100996385 |             | 0           | 0           | 7.142846024 | 0 |
| PRRT3-AS1    | PRRT3-AS1    |             | 91.36696245 |             | 198.0402945 |   |
|              |              | 133.0355072 |             |             |             |   |
| ZNF598       | ZNF598       | 1679.746464 | 989.1858814 |             | 932.1414062 |   |
|              |              | 864.5056241 |             |             |             |   |
| HS6ST2       | HS6ST2       | 3.51411394  | 0           | 0           | 10.37029647 |   |
| CRYBG3       | CRYBG3       | 946.4680213 | 1619.86805  |             | 799.105899  |   |
|              |              | 818.3106671 |             |             |             |   |
| HIF1A-AS1    | HIF1A-AS1    |             | 1389.246378 |             | 1464.482588 |   |
|              |              | 2151.782365 |             |             |             |   |
|              |              | 2655.738651 |             |             |             |   |

|                 |              |             |             |  |             |
|-----------------|--------------|-------------|-------------|--|-------------|
| ITPKB-IT1       | ITPKB-IT1    | 16.39919839 | 5.07795627  |  |             |
| 12.49998054     | 30.16813519  |             |             |  |             |
| OXCT1-AS1       | OXCT1-AS1    | 637.2259945 | 879.502026  |  |             |
| 421.4279154     | 486.46118    |             |             |  |             |
| ZNF350-AS1      | ZNF350-AS1   | 8.199599194 | 2.031182508 |  | 0           |
|                 | 10.37029647  |             |             |  |             |
| NPTN-IT1        | NPTN-IT1     | 42.16936728 | 20.31182508 |  |             |
| 51.78563368     | 66.93554995  |             |             |  |             |
| SGOL1-AS1       | SGOL1-AS1    | 802.3893497 | 999.341794  |  |             |
| 262.4995914     | 415.7546131  |             |             |  |             |
| LOC101241902    | LOC101241902 | 0           | 5.07795627  |  | 1.785711506 |
|                 | 7.542033798  |             |             |  |             |
| LINC00398       | LINC00398    | 7.028227881 | 1.015591254 |  |             |
| 8.035701777     | 1.885508449  |             |             |  |             |
| RNF219-AS1      | RNF219-AS1   | 1076.490237 | 1026.762758 |  |             |
| 1405.354955     | 1376.421168  |             |             |  |             |
| HM13-AS1        | HM13-AS1     | 30.45565415 | 12.18709505 |  |             |
| 17.85711506     | 37.71016899  |             |             |  |             |
| MRPL21 MRPL21   | 2318.143829  | 2844.671103 | 1785.711506 |  |             |
| 1865.710611     |              |             |             |  |             |
| ACKR3 ACKR3     | 67.93953618  | 113.7462205 | 126.7855169 |  |             |
| 98.04643937     |              |             |             |  |             |
| SMG8 SMG8       | 2818.31938   | 3354.497912 | 3008.923888 |  |             |
| 2808.464835     |              |             |             |  |             |
| LOC101927575    | LOC101927575 | 1.171371313 | 0           |  | 4.464278765 |
|                 | 3.771016899  |             |             |  |             |
| EMC3-AS1        | EMC3-AS1     | 255.3589463 | 226.4768497 |  |             |
| 95.53556557     | 188.5508449  |             |             |  |             |
| ADAMTSL4-AS1    | ADAMTSL4-AS1 | 77.31050669 | 41.63924142 |  |             |
| 80.35701777     | 62.22177883  |             |             |  |             |
| LINC00545       | LINC00545    | 0           | 0           |  | 3.771016899 |
| INTS6-AS1       | INTS6-AS1    | 210.8468364 | 89.37203036 |  |             |
| 158.0354683     | 250.7726238  |             |             |  |             |
| LINC00540       | LINC00540    | 96.0524477  | 104.6058992 |  |             |
| 247.3210436     | 491.1749511  |             |             |  |             |
| LOC101805491    | LOC101805491 | 0           | 0           |  | 2.678567259 |
| 0.942754225     |              |             |             |  |             |
| LOC102546226    | LOC102546226 | 0           | 1.015591254 |  | 0           |
| YWHAEP1 YWHAEP1 | 1.171371313  | 0           | 0           |  | 1.885508449 |
| LINC01271       | LINC01271    | 2.342742627 | 22.34300759 |  | 0           |
|                 | 0            |             |             |  |             |
| LINC01431       | LINC01431    | 9.370970508 | 6.093547524 |  |             |
| 16.07140355     | 16.96957604  |             |             |  |             |
| CCL3L1 CCL3L1   | 29.28428284  | 18.28064257 | 174.1068718 |  |             |
| 68.8210584      |              |             |             |  |             |
| PACS1 PACS1     | 5378.937071  | 3448.947899 | 4259.814798 |  |             |
| 4610.068159     |              |             |             |  |             |
| LOC100101148    | LOC100101148 | 30.45565415 | 41.63924142 |  |             |
| 66.07132572     | 56.56525348  |             |             |  |             |
| NUDT4P2 NUDT4P2 | 4065.829829  | 4801.715449 | 4062.493676 |  |             |

|                 |              |             |             |             |   |
|-----------------|--------------|-------------|-------------|-------------|---|
| 3905.830753     |              |             |             |             |   |
| TVP23B TVP23B   | 1589.550872  | 2480.073842 | 3802.672652 |             |   |
| 2736.815514     |              |             |             |             |   |
| ZNF253 ZNF253   | 566.9437157  | 712.9450603 | 1637.497451 |             |   |
| 1298.172567     |              |             |             |             |   |
| KRTAP5-8        | KRTAP5-8     | 0           | 0           | 1.785711506 | 0 |
| MEX3B MEX3B     | 2.342742627  | 6.093547524 | 0.892855753 |             |   |
| 7.542033798     |              |             |             |             |   |
| ANKRD61 ANKRD61 | 24.59879758  | 25.38978135 | 22.32139383 |             |   |
| 37.71016899     |              |             |             |             |   |
| LOC441155       | LOC441155    | 11.71371313 | 3.046773762 |             |   |
| 12.49998054     | 16.02682182  |             |             |             |   |
| DGCR6 DGCR6     | 77.31050669  | 75.1537528  | 369.6422818 |             |   |
| 302.6241061     |              |             |             |             |   |
| MST1L MST1L     | 4.685485254  | 0           | 16.07140355 | 5.656525348 |   |
| SLC36A2 SLC36A2 | 0            | 0           | 4.464278765 | 0           |   |
| DDX51 DDX51     | 1955.018722  | 2394.764177 | 2488.388984 |             |   |
| 2031.635354     |              |             |             |             |   |
| AAMDC AAMDC     | 377.1815629  | 554.5128247 | 362.4994357 |             |   |
| 377.1016899     |              |             |             |             |   |
| PFN4 PFN4       | 3.51411394   | 1.015591254 | 12.49998054 |             |   |
| 15.0840676      |              |             |             |             |   |
| XRCC2 XRCC2     | 1266.25239   | 611.3859349 | 399.1065216 |             |   |
| 495.8887222     |              |             |             |             |   |
| MTDH MTDH       | 6402.715599  | 7001.486105 | 7288.381512 |             |   |
| 6733.150673     |              |             |             |             |   |
| LOC220729       | LOC220729    | 761.3913537 | 676.3837752 |             |   |
| 566.9634032     | 709.8939312  |             |             |             |   |
| LOC101927204    | LOC101927204 | 331.4980817 | 309.7553325 |             |   |
| 374.1065605     | 421.4111384  |             |             |             |   |
| LOC101927501    | LOC101927501 | 2.342742627 | 9.140321286 |             |   |
| 11.60712479     | 9.427542247  |             |             |             |   |
| LINC01280       | LINC01280    | 0           | 0           | 0.892855753 | 0 |
| LOC101928259    | LOC101928259 | 1.171371313 | 0           | 2.678567259 |   |
| 0               |              |             |             |             |   |
| LINC01473       | LINC01473    | 2.342742627 | 5.07795627  |             |   |
| 21.42853807     | 13.19855915  |             |             |             |   |
| LOC101929241    | LOC101929241 | 73.79639275 | 75.1537528  |             |   |
| 136.6069302     | 177.2377942  |             |             |             |   |
| NUTM2B NUTM2B   | 1.171371313  | 0           | 8.92855753  | 1.885508449 |   |
| MIR6780A        | MIR6780A     | 2.342742627 | 1.015591254 |             |   |
| 4.464278765     | 1.885508449  |             |             |             |   |
| MIR6779 MIR6779 | 30.45565415  | 24.3741901  | 8.92855753  |             |   |
| 10.37029647     |              |             |             |             |   |
| MIR6778 MIR6778 | 21.08468364  | 29.45214637 | 14.28569205 |             |   |
| 8.484788022     |              |             |             |             |   |
| MIR6777 MIR6777 | 4.685485254  | 2.031182508 | 10.71426904 |             |   |
| 5.656525348     |              |             |             |             |   |
| MIR6776 MIR6776 | 2.342742627  | 5.07795627  | 5.357134518 |             |   |
| 2.828262674     |              |             |             |             |   |

|              |              |             |             |             |             |
|--------------|--------------|-------------|-------------|-------------|-------------|
| MIR6775      | MIR6775      | 50.36896648 | 29.45214637 | 41.96422039 |             |
| 44.30944856  |              |             |             |             |             |
| MIR6774      | MIR6774      | 1.171371313 | 5.07795627  | 19.64282657 |             |
| 9.427542247  |              |             |             |             |             |
| MIR7846      | MIR7846      | 1536.839163 | 2419.138367 | 516.0706253 |             |
| 709.8939312  |              |             |             |             |             |
| MIR6830      | MIR6830      | 0           | 0           | 0.942754225 |             |
| LOC728323    | LOC728323    |             | 124.1653592 | 92.41880412 |             |
| 218.7496595  | 230.9747851  |             |             |             |             |
| FUT1         | FUT1         | 0           | 6.093547524 | 50.89277792 | 91.4471598  |
| NCK1-AS1     | NCK1-AS1     |             | 405.2944745 | 389.9870416 |             |
| 180.3568621  | 329.0212244  |             |             |             |             |
| AIM1         | AIM1         | 4013.11812  | 3610.426908 | 5133.92058  |             |
| 5587.70429   |              |             |             |             |             |
| C1orf189     | C1orf189     |             | 4.685485254 | 4.062365016 |             |
| 28.5713841   | 6.599279573  |             |             |             |             |
| GTPBP1       | GTPBP1       | 4787.394558 | 4519.381081 | 6014.276352 |             |
| 4530.876804  |              |             |             |             |             |
| C12orf40     | C12orf40     |             | 7.028227881 | 3.046773762 |             |
| 17.85711506  | 7.542033798  |             |             |             |             |
| ACER2        | ACER2        | 25.7701689  | 52.81074521 | 126.7855169 |             |
| 39.59567744  |              |             |             |             |             |
| ZNF391       | ZNF391       | 40.99799597 | 23.35859884 | 60.71419121 |             |
| 77.30584643  |              |             |             |             |             |
| CHKB-CPT1B   | CHKB-CPT1B   |             | 4765.138503 | 2116.492173 |             |
| 3570.530156  | 4175.458461  |             |             |             |             |
| LOC149373    | LOC149373    |             | 0           | 0           | 0.942754225 |
| GBP7         | GBP7         | 2.342742627 | 34.53010264 | 126.7855169 |             |
| 1.885508449  |              |             |             |             |             |
| TEX43        | TEX43        | 0           | 2.031182508 | 0           |             |
| TMEM41A      | TMEM41A      | 1153.800744 | 1523.386881 | 1089.284019 |             |
| 1250.092102  |              |             |             |             |             |
| GFM1         | GFM1         | 5578.070195 | 7493.032272 | 6333.918712 |             |
| 6795.372452  |              |             |             |             |             |
| MARK2P9      | MARK2P9      | 1.171371313 | 3.046773762 | 5.357134518 | 0           |
| NTRK3-AS1    | NTRK3-AS1    |             | 2.342742627 | 0           | 0           |
| FBXL14       | FBXL14       | 1738.315029 | 2328.750746 | 2341.067784 | 0           |
| 2051.433193  |              |             |             |             |             |
| AMDHD1       | AMDHD1       | 10.54234182 | 14.21827756 | 87.4998638  |             |
| 41.48118589  |              |             |             |             |             |
| BANCR        | BANCR        | 4.685485254 | 0           | 0.942754225 |             |
| LOC100506606 | LOC100506606 |             | 159.3064986 | 230.5392147 |             |
| 164.2854586  | 147.0696591  |             |             |             |             |
| FRG2         | FRG2         | 2.342742627 | 0           | 0           | 0           |
| MAGOH2       | MAGOH2       | 0           | 1.015591254 | 0           | 0.942754225 |
| AKAP10       | AKAP10       | 2807.777038 | 2631.396939 | 3234.816393 |             |
| 3112.031696  |              |             |             |             |             |
| PRSS46       | PRSS46       | 1.171371313 | 0           | 0           | 0           |
| FAM83C       | FAM83C       | 1.171371313 | 1.015591254 | 0           | 0           |
| DNAAF1       | DNAAF1       | 50.36896648 | 18.28064257 | 23.21424958 |             |

|              |              |             |             |             |             |
|--------------|--------------|-------------|-------------|-------------|-------------|
| 24.51160984  |              |             |             |             |             |
| 3-Mar        | 3-Mar        | 448.6352131 | 636.7757163 | 648.2132767 |             |
| 565.6525348  |              |             |             |             |             |
| NAT8L        | NAT8L        | 2.342742627 | 1.015591254 | 0           | 2.828262674 |
| HSP90B2P     | HSP90B2P     |             | 15.22782708 | 19.29623383 |             |
| 23.21424958  | 23.56885562  |             |             |             |             |
| VNN1         | VNN1         | 0           | 29.46423985 | 0           |             |
| KCNU1        | KCNU1        | 0           | 3.571423012 | 5.656525348 |             |
| LINC00618    | LINC00618    |             | 1.171371313 | 9.140321286 |             |
| 11.60712479  | 1.885508449  |             |             |             |             |
| AARD         | AARD         | 52.71170911 | 36.56128515 | 0           | 4.713771124 |
| CHRN2        | CHRN2        | 5.856856567 | 0           | 3.571423012 | 12.25580492 |
| LOC101929340 | LOC101929340 |             | 5.856856567 | 2.031182508 | 0           |
|              | 10.37029647  |             |             |             |             |
| ZNF827       | ZNF827       | 245.9879758 | 160.4634181 | 573.2133934 |             |
| 382.7582152  |              |             |             |             |             |
| LOC339539    | LOC339539    |             | 2.342742627 | 2.031182508 | 0           |
|              | 6.599279573  |             |             |             |             |
| LOC388780    | LOC388780    |             | 3.51411394  | 6.093547524 |             |
| 11.60712479  | 1.885508449  |             |             |             |             |
| IL21-AS1     | IL21-AS1     |             | 228.4174061 | 49.76397145 |             |
| 94.64270982  | 444.0372398  |             |             |             |             |
| LINC01100    | LINC01100    |             | 4.685485254 | 1.015591254 | 0           |
|              | 0            |             |             |             |             |
| LINC01057    | LINC01057    |             | 8.199599194 | 0           | 0           |
| 0.942754225  |              |             |             |             |             |
| NBPF25P      | NBPF25P      | 849.2442023 | 774.8961268 | 1708.925911 |             |
| 959.7238008  |              |             |             |             |             |
| ARMC2-AS1    | ARMC2-AS1    |             | 3.51411394  | 4.062365016 |             |
| 1.785711506  | 0.942754225  |             |             |             |             |
| NPC2         | NPC2         | 1588.379501 | 1519.324516 | 3406.244698 |             |
| 2317.289884  |              |             |             |             |             |
| AHCTF1P1     | AHCTF1P1     |             | 40.99799597 | 24.3741901  |             |
| 31.24995136  | 23.56885562  |             |             |             |             |
| TRIM49B      | TRIM49B      | 0           | 0.892855753 | 0           |             |
| FAM87B       | FAM87B       | 24.59879758 | 32.49892013 | 43.7499319  |             |
| 32.99639787  |              |             |             |             |             |
| LINC00337    | LINC00337    |             | 53.88308042 | 46.71719769 |             |
| 29.46423985  | 43.36669434  |             |             |             |             |
| ZNF433       | ZNF433       | 78.481878   | 59.91988399 | 201.7854002 |             |
| 309.2233857  |              |             |             |             |             |
| IRAK1BP1     | IRAK1BP1     |             | 213.1895791 | 135.0736368 |             |
| 118.7498152  | 185.7225823  |             |             |             |             |
| GBP3         | GBP3         | 1095.232178 | 896.7670773 | 1991.961185 |             |
| 1487.666167  |              |             |             |             |             |
| LGR4         | LGR4         | 14.05645576 | 14.21827756 | 44.64278765 |             |
| 5.656525348  |              |             |             |             |             |
| ADI1         | ADI1         | 6544.451528 | 7226.947364 | 4830.349624 |             |
| 4861.783537  |              |             |             |             |             |
| WDR41        | WDR41        | 1417.359289 | 1403.547113 | 1334.819351 |             |

|                 |              |             |             |             |
|-----------------|--------------|-------------|-------------|-------------|
| 1257.634136     |              |             |             |             |
| DISC1FP1        | DISC1FP1     | 2.342742627 | 1.015591254 |             |
| 8.92855753      | 3.771016899  |             |             |             |
| LOC100506688    | LOC100506688 | 304.5565415 | 529.1230434 |             |
| 47.32135491     | 48.08046546  |             |             |             |
| LOC100996447    | LOC100996447 | 91.36696245 | 25.38978135 |             |
| 41.96422039     | 38.65292321  |             |             |             |
| LOC103021295    | LOC103021295 | 2076.841339 | 1467.529362 |             |
| 1114.28398      | 1659.247436  |             |             |             |
| RALGAPA1P       | RALGAPA1P    | 1622.349269 | 1407.609478 |             |
| 1700.89021      | 1656.419173  |             |             |             |
| H0XC-AS2        | H0XC-AS2     | 0           | 0           | 0.942754225 |
| RPL24 RPL24     | 7209.790434  | 7243.196824 | 8154.451592 |             |
| 7834.287607     |              |             |             |             |
| LOC101927623    | LOC101927623 | 0           | 3.046773762 | 0           |
| 2.828262674     |              |             |             |             |
| LOC440311       | LOC440311    | 4.685485254 | 1.015591254 |             |
| 2.678567259     | 0            |             |             |             |
| SRGAP2-AS1      | SRGAP2-AS1   | 2.342742627 | 4.062365016 |             |
| 1.785711506     | 9.427542247  |             |             |             |
| LOC102288414    | LOC102288414 | 4441.840021 | 5739.106177 |             |
| 3668.744289     | 3490.07614   |             |             |             |
| CPTP CPTP       | 1574.323045  | 2016.964231 | 1122.319682 |             |
| 864.5056241     |              |             |             |             |
| PLEKHG1 PLEKHG1 | 208.5040938  | 79.21611782 | 58.9284797  |             |
| 491.1749511     |              |             |             |             |
| LOC102467217    | LOC102467217 | 0           | 0           | 0.892855753 |
| RPA1 RPA1       | 15060.32098  | 18249.15924 | 12957.12269 | 0           |
| 12247.32013     |              |             |             |             |
| DCUN1D3 DCUN1D3 | 182.7339249  | 222.4144846 | 263.3924471 |             |
| 187.6080907     |              |             |             |             |
| TRIL TRIL       | 23.42742627  | 1.015591254 | 2.678567259 |             |
| 19.79783872     |              |             |             |             |
| MIR6890 MIR6890 | 10.54234182  | 12.18709505 | 14.28569205 |             |
| 16.02682182     |              |             |             |             |
| MIR7703 MIR7703 | 6371.088574  | 9174.851389 | 7643.738102 |             |
| 7145.134269     |              |             |             |             |
| PYCARD0S        | PYCARD0S     | 988.6373886 | 1760.019643 |             |
| 299.1066773     | 461.9495701  |             |             |             |
| TAS2R42 TAS2R42 | 0            | 0           | 0.942754225 |             |
| LINC01205       | LINC01205    | 0           | 0           | 1.785711506 |
| 1.885508449     |              |             |             |             |
| LOC100507642    | LOC100507642 | 60.9113083  | 64.99784026 |             |
| 115.1783921     | 125.3863119  |             |             |             |
| CD81-AS1        | CD81-AS1     | 317.4416259 | 656.0719501 |             |
| 437.499319      | 139.5276253  |             |             |             |
| LOC102467073    | LOC102467073 | 18.74194102 | 16.24946006 |             |
| 16.96425931     | 16.96957604  |             |             |             |
| LOC101928370    | LOC101928370 | 559.9154878 | 776.9273093 |             |
| 345.5351764     | 425.1821553  |             |             |             |



|              |              |             |             |             |             |
|--------------|--------------|-------------|-------------|-------------|-------------|
| LOC101929681 | LOC101929681 | 0           | 0           | 0           | 0.942754225 |
| ZNF852       | ZNF852       | 135.8790724 | 122.8865417 | 274.1067162 |             |
| 247.9443611  |              |             |             |             |             |
| FLJ31356     | FLJ31356     | 0           | 1.015591254 | 0           | 0           |
| LOC100287098 | LOC100287098 | 194.6425542 | 521.2602345 | 401.1585454 |             |
| 263.9711829  |              |             |             |             |             |
| LOC101929154 | LOC101929154 | 0           | 0           | 0.892855753 | 0           |
| MIR6719      | MIR6719      | 2.342742627 | 1.015591254 | 16.07140355 |             |
| 4.713771124  |              |             |             |             |             |
| TMEM183B     | TMEM183B     | 3676.779991 | 3669.906325 | 4852.495012 |             |
| 3417.484065  |              |             |             |             |             |
| CCNK         | CCNK         | 662.9961634 | 512.8735833 | 681.2489396 |             |
| 667.4699911  |              |             |             |             |             |
| LOC101593348 | LOC101593348 | 20.53568232 | 15.22782708 | 19.29623383 |             |
| 4.713771124  |              |             |             |             |             |
| MIR6069      | MIR6069      | 0           | 0           | 0.942754225 |             |
| MIR1199      | MIR1199      | 1.171371313 | 2.031182508 | 4.464278765 |             |
| 4.713771124  |              |             |             |             |             |
| LOC101926905 | LOC101926905 | 1.171371313 | 1.171371313 | 0           | 0           |
| ACTG1P4      | ACTG1P4      | 5.856856567 | 0           | 0           | 1.885508449 |
| LINC00850    | LINC00850    | 0           | 0           | 0.892855753 | 0           |
| MIR6755      | MIR6755      | 26.94154021 | 6.093547524 | 12.49998054 |             |
| 16.02682182  |              |             |             |             |             |
| MIR6754      | MIR6754      | 5.856856567 | 8.124730032 | 12.49998054 |             |
| 2.828262674  |              |             |             |             |             |
| MIR6753      | MIR6753      | 32.79839678 | 42.65483267 | 32.14280711 |             |
| 35.82466054  |              |             |             |             |             |
| MIR6741      | MIR6741      | 21.08468364 | 7.109138778 | 24.99996108 |             |
| 22.62610139  |              |             |             |             |             |
| NEXN-AS1     | NEXN-AS1     | 0           | 0           | 0           | 9.427542247 |
| MIR6084      | MIR6084      | 50.36896648 | 90.38762161 | 302.6781003 |             |
| 147.0696591  |              |             |             |             |             |
| MIR6080      | MIR6080      | 1.171371313 | 2.031182508 | 1.785711506 |             |
| 4.713771124  |              |             |             |             |             |
| MIR6739      | MIR6739      | 8.199599194 | 6.093547524 | 4.464278765 |             |
| 10.37029647  |              |             |             |             |             |
| MIR6748      | MIR6748      | 35.1411394  | 39.60805891 | 54.46420093 |             |
| 56.56525348  |              |             |             |             |             |
| MIR6738      | MIR6738      | 3.51411394  | 1.015591254 | 1.785711506 |             |
| 1.885508449  |              |             |             |             |             |
| MIR6747      | MIR6747      | 87.85284851 | 90.38762161 | 86.60700804 |             |
| 82.96237177  |              |             |             |             |             |
| MIR6737      | MIR6737      | 5.856856567 | 11.17150379 | 5.357134518 |             |
| 7.542033798  |              |             |             |             |             |
| MIR6746      | MIR6746      | 0           | 0           | 3.571423012 | 1.885508449 |
| MIR6736      | MIR6736      | 0           | 4.062365016 | 3.571423012 | 0.942754225 |
| MIR6735      | MIR6735      | 0           | 0           | 2.828262674 |             |
| MIR6734      | MIR6734      | 10.54234182 | 3.046773762 | 10.71426904 |             |
| 10.37029647  |              |             |             |             |             |
| MESP2        | MESP2        | 2.342742627 | 10.15591254 | 11.60712479 | 0           |

|         |         |             |             |             |
|---------|---------|-------------|-------------|-------------|
| MIR6743 | MIR6743 | 9.370970508 | 12.18709505 | 27.67852834 |
|         |         | 13.19855915 |             |             |
| MIR6733 | MIR6733 | 32.79839678 | 38.59246765 | 58.03562395 |
|         |         | 57.50800771 |             |             |
| MIR6731 | MIR6731 | 16.39919839 | 38.59246765 | 32.14280711 |
|         |         | 23.56885562 |             |             |
| MIR6732 | MIR6732 | 16.39919839 | 21.32741634 | 40.17850889 |
|         |         | 23.56885562 |             |             |
| MIR6742 | MIR6742 | 8.199599194 | 6.093547524 | 5.357134518 |
|         |         | 12.25580492 |             |             |
| MIR6729 | MIR6729 | 4.685485254 | 1.015591254 | 2.678567259 |
|         |         | 2.828262674 |             |             |
| MIR6728 | MIR6728 | 203.8186085 | 382.8779028 | 139.2854975 |
|         |         | 219.6617344 |             |             |
| MIR6727 | MIR6727 | 17.5705697  | 16.24946006 | 16.07140355 |
|         |         | 16.02682182 |             |             |
| MIR6726 | MIR6726 | 0           | 1.015591254 | 1.785711506 |
|         |         |             |             | 0.942754225 |
| MIR6723 | MIR6723 | 2.342742627 | 1.015591254 | 0.892855753 |
|         |         | 2.828262674 |             |             |
| IP05P1  | IP05P1  | 365.4678498 | 214.2897546 | 366.0708587 |
|         |         | 358.2466054 |             |             |
| FSBP    | FSBP    | 241.3024906 | 196.009112  | 317.8566481 |
|         |         | 221.5472428 |             |             |
| MIR6751 | MIR6751 | 5.856856567 | 1.015591254 | 1.785711506 |
|         |         | 0.942754225 |             |             |
| MIR6752 | MIR6752 | 30.45565415 | 57.88870148 | 34.82137437 |
|         |         | 51.85148236 |             |             |
| MIR6740 | MIR6740 | 1.171371313 | 10.15591254 | 5.357134518 |
|         |         | 2.828262674 |             |             |
| MIR6750 | MIR6750 | 2.342742627 | 0           | 0           |
|         |         |             |             | 3.771016899 |
| C9orf85 | C9orf85 | 446.2924704 | 414.3612317 | 350.8923109 |
|         |         | 378.0444441 |             |             |
| MYLK3   | MYLK3   | 4.685485254 | 2.031182508 | 0           |
|         |         |             |             | 8.484788022 |
| CASC17  | CASC17  | 0           | 0           | 0           |
|         |         |             |             | 1.785711506 |
| MIR6808 | MIR6808 | 0           | 1.015591254 | 1.785711506 |
|         |         |             |             | 0           |
| MIR6807 | MIR6807 | 53.88308042 | 48.74838019 | 68.74989298 |
|         |         | 50.90872813 |             |             |
| MIR6806 | MIR6806 | 1.171371313 | 0           | 0.892855753 |
|         |         |             |             | 0           |
| MIR6805 | MIR6805 | 12.88508445 | 6.093547524 | 12.49998054 |
|         |         | 10.37029647 |             |             |
| C2orf91 | C2orf91 | 0           | 0           | 0.892855753 |
|         |         |             |             | 0           |
| MIR6826 | MIR6826 | 32.79839678 | 84.29407409 | 41.96422039 |
|         |         | 32.99639787 |             |             |
| MIR6825 | MIR6825 | 29.28428284 | 52.81074521 | 58.03562395 |
|         |         | 32.99639787 |             |             |
| MIR6821 | MIR6821 | 108.9375322 | 184.8376082 | 144.642632  |
|         |         | 107.4739816 |             |             |
| MIR6820 | MIR6820 | 5.856856567 | 11.17150379 | 21.42853807 |
|         |         | 45.25220279 |             |             |
| MIR6819 | MIR6819 | 62.08267961 | 41.63924142 | 30.3570956  |

|              |              |             |   |             |             |
|--------------|--------------|-------------|---|-------------|-------------|
| 28.28262674  |              |             |   |             |             |
| MIR6818      | MIR6818      | 0           | 0 | 2.678567259 | 0           |
| MIR6817      | MIR6817      | 12.88508445 |   | 22.34300759 | 20.53568232 |
| 7.542033798  |              |             |   |             |             |
| MIR6816      | MIR6816      | 12.88508445 |   | 5.07795627  | 17.85711506 |
| 8.484788022  |              |             |   |             |             |
| MIR6815      | MIR6815      | 1.171371313 |   | 0           | 1.785711506 |
| MIR6813      | MIR6813      | 5.856856567 |   | 11.17150379 | 0           |
| MIR6812      | MIR6812      | 3.51411394  |   | 1.015591254 | 0           |
| MIR6810      | MIR6810      | 0           | 0 | 3.571423012 | 0           |
| GOLGA80      | GOLGA80      | 3.51411394  |   | 0           | 0           |
| TMEM255B     | TMEM255B     |             |   | 1.171371313 | 0           |
| 4.713771124  |              |             |   |             |             |
| SMARCA5-AS1  | SMARCA5-AS1  |             |   | 1251.024563 | 1337.533682 |
| 1304.462255  |              | 1139.789858 |   |             |             |
| CYTH3        | CYTH3        | 118.3085027 |   | 52.81074521 | 662.4989687 |
| 571.3090602  |              |             |   |             |             |
| C1orf233     | C1orf233     |             |   | 80.82462063 | 155.3854619 |
| 106.2498346  |              | 164.0392351 |   |             |             |
| POT1         | POT1         | 2.342742627 |   | 1.015591254 | 0.892855753 |
| RDH12        | RDH12        | 2.342742627 |   | 8.124730032 | 1.785711506 |
| 10.37029647  |              |             |   |             |             |
| MIR6850      | MIR6850      | 86.6814772  |   | 98.51235164 | 89.2855753  |
| 95.2181767   |              |             |   |             |             |
| MIR7856      | MIR7856      | 0           | 0 | 0           | 2.828262674 |
| MIR7855      | MIR7855      | 0           | 0 | 0           | 0.942754225 |
| LOC101929680 | LOC101929680 |             |   | 8.199599194 | 3.046773762 |
| 0.892855753  |              | 2.828262674 |   |             |             |
| CD38         | CD38         | 7169.96381  |   | 9176.882572 | 1635.71174  |
| 2091.971625  |              |             |   |             |             |
| NMI          | NMI          | 3569.168392 |   | 3749.56291  | 5033.920736 |
| 4441.315153  |              |             |   |             |             |
| MIR6842      | MIR6842      | 16.39919839 |   | 19.29623383 | 23.21424958 |
| 16.96957604  |              |             |   |             |             |
| LINC01215    | LINC01215    |             |   | 104.2520469 | 69.06020528 |
| 166.9640258  |              | 111.2449985 |   |             |             |
| MIR6851      | MIR6851      | 4.685485254 |   | 3.046773762 | 4.464278765 |
| 4.713771124  |              |             |   |             |             |
| MIR6849      | MIR6849      | 26.94154021 |   | 25.38978135 | 6.249990271 |
| 25.45436407  |              |             |   |             |             |
| MIR6839      | MIR6839      | 4.685485254 |   | 1.015591254 | 0           |
| MIR6848      | MIR6848      | 126.5081019 |   | 153.3542794 | 178.5711506 |
| 177.2377942  |              |             |   |             |             |
| ERI3-IT1     | ERI3-IT1     |             |   | 18.74194102 | 34.53010264 |
| 30.3570956   |              | 15.0840676  |   |             |             |
| MIR6836      | MIR6836      | 3.51411394  |   | 9.140321286 | 4.464278765 |
| 9.427542247  |              |             |   |             |             |
| MIR6837      | MIR6837      | 45.68348122 |   | 67.02902277 | 35.71423012 |
| 32.05364364  |              |             |   |             |             |
| MIR6862-1    | MIR6862-1    |             |   | 0           | 4.062365016 |
|              |              |             |   |             | 5.357134518 |

|              |              |             |             |             |
|--------------|--------------|-------------|-------------|-------------|
| 7.542033798  |              |             |             |             |
| MIR8055      | MIR8055      | 8.199599194 | 5.07795627  | 10.71426904 |
| 0.942754225  |              |             |             |             |
| MIR6769B     | MIR6769B     |             | 7.028227881 | 16.24946006 |
| 7.142846024  | 8.484788022  |             |             |             |
| HIST1H2BF    | HIST1H2BF    |             | 590.371142  | 143.1983668 |
| 60.71419121  | 58.45076193  |             |             |             |
| MIR8071-1    | MIR8071-1    |             | 0           | 0.942754225 |
| MIR6878      | MIR6878      | 5.856856567 | 7.109138778 | 15.1785478  |
| 12.25580492  |              |             |             |             |
| MIR6879      | MIR6879      | 14.05645576 | 23.35859884 | 34.82137437 |
| 30.16813519  |              |             |             |             |
| MIR8072      | MIR8072      | 139.3931863 | 219.3677109 | 212.4996692 |
| 115.9587696  |              |             |             |             |
| MIR6866      | MIR6866      | 12.88508445 | 32.49892013 | 24.10710533 |
| 21.68334717  |              |             |             |             |
| TTLL13       | TTLL13       | 14.05645576 | 44.68601518 | 36.60708587 |
| 55.62249926  |              |             |             |             |
| LOC101928682 | LOC101928682 |             | 2.342742627 | 2.031182508 |
| 1.785711506  | 1.885508449  |             |             |             |
| LOC102467146 | LOC102467146 |             | 18.74194102 | 23.35859884 |
| 20.74059294  |              |             |             | 0           |
| ABHD5        | ABHD5        | 1200.655596 | 1280.660571 | 637.4990077 |
| 811.7113875  |              |             |             |             |
| OPLAH        | OPLAH        | 32.79839678 | 90.38762161 | 93.74985407 |
| 104.6457189  |              |             |             |             |
| MIR7107      | MIR7107      | 48.02622385 | 14.21827756 | 2.678567259 |
| 11.3130507   |              |             |             |             |
| MIR7106      | MIR7106      | 3.51411394  | 2.031182508 | 9.821413283 |
| 2.828262674  |              |             |             |             |
| PARGP1       | PARGP1       | 263.5585455 | 254.9134048 | 261.6067356 |
| 273.3987252  |              |             |             |             |
| MRPL45       | MRPL45       | 2702.35362  | 3299.655984 | 2275.889314 |
| 2346.515265  |              |             |             |             |
| MIR6862-2    | MIR6862-2    |             | 0           | 4.062365016 |
| 5.357134518  |              |             |             |             |
| 7.542033798  |              |             |             |             |
| MIR7108      | MIR7108      | 5.856856567 | 9.140321286 | 1.785711506 |
| 1.885508449  |              |             |             |             |
| MIR7112      | MIR7112      | 8.199599194 | 8.124730032 | 6.249990271 |
| 13.19855915  |              |             |             |             |
| MIR8071-2    | MIR8071-2    |             | 0           | 0.942754225 |
| LINC01436    | LINC01436    |             | 0           | 3.046773762 |
| 6.249990271  |              |             |             |             |
| 0            |              |             |             |             |
| LINC01208    | LINC01208    |             | 0           | 0           |
| LINC00867    | LINC00867    |             | 0           | 0           |
| 2.828262674  |              |             |             | 3.771016899 |
| MIR6859-2    | MIR6859-2    |             | 11.71371313 | 1.015591254 |
| 8.92855753   | 8.484788022  |             |             |             |
| MIR7114      | MIR7114      | 2.342742627 | 0           | 0.892855753 |
| 0            |              |             |             | 0           |
| LOC644919    | LOC644919    |             | 0           | 3.571423012 |
| 2.828262674  |              |             |             |             |

|                 |              |             |                 |
|-----------------|--------------|-------------|-----------------|
| LOC101927100    | LOC101927100 | 55.05445173 | 63.98224901     |
| 58.03562395     | 45.25220279  |             |                 |
| VIM-AS1 VIM-AS1 | 8942.248607  | 13660.71796 | 6260.70454      |
| 5198.346795     |              |             |                 |
| RNF139-AS1      | RNF139-AS1   | 36.31251072 | 21.32741634     |
| 98.21413283     | 66.93554995  |             |                 |
| HERC2P4 HERC2P4 | 7.028227881  | 15.23386881 | 42.85707615     |
| 4.713771124     |              |             |                 |
| DNAJB5-AS1      | DNAJB5-AS1   | 0           | 2.031182508 0 0 |
| LINC01103       | LINC01103    | 0           | 1.015591254 0 0 |
| B4GALT1-AS1     | B4GALT1-AS1  | 180.3911823 | 100.5435342     |
| 135.7140745     | 202.6921583  |             |                 |
| FAM83C-AS1      | FAM83C-AS1   | 4.685485254 | 7.109138778     |
| 2.678567259     | 0            |             |                 |
| LPP-AS1 LPP-AS1 | 1.171371313  | 0 0         | 0.942754225     |
| IL12A-AS1       | IL12A-AS1    | 62.08267961 | 51.79515396     |
| 5.357134518     | 20.74059294  |             |                 |
| LOC102606465    | LOC102606465 | 585.6856567 | 710.9138778     |
| 484.8206739     | 524.1713489  |             |                 |
| CLYBL-AS2       | CLYBL-AS2    | 1.171371313 | 0 0 0           |
| LOC102467147    | LOC102467147 | 8.199599194 | 4.062365016     |
| 4.464278765     | 9.427542247  |             |                 |
| LOC101928438    | LOC101928438 | 0 0         | 3.571423012 0   |
| LOC102467081    | LOC102467081 | 22.25605496 | 0 12.49998054   |
|                 | 18.85508449  |             |                 |
| LOC102467080    | LOC102467080 | 0           | 1.015591254 0 0 |
| LOC100506985    | LOC100506985 | 288.1573431 | 158.4322356     |
| 396.4279543     | 461.9495701  |             |                 |
| LOC100505942    | LOC100505942 | 3.51411394  | 0 4.464278765   |
|                 | 6.599279573  |             |                 |
| ITPR1-AS1       | ITPR1-AS1    | 1.171371313 | 9.140321286     |
| 31.24995136     | 22.62610139  |             |                 |
| LINC01279       | LINC01279    | 3.51411394  | 2.031182508     |
| 10.71426904     | 10.37029647  |             |                 |
| SYP-AS1 SYP-AS1 | 9.370970508  | 2.031182508 | 14.28569205     |
| 4.713771124     |              |             |                 |
| MIR6858 MIR6858 | 1.171371313  | 2.031182508 | 4.464278765     |
| 0.942754225     |              |             |                 |
| MIR6857 MIR6857 | 7.028227881  | 9.140321286 | 7.142846024     |
| 5.656525348     |              |             |                 |
| LOC101926911    | LOC101926911 | 11.71371313 | 11.17150379     |
| 25.89281684     | 4.713771124  |             |                 |
| MIR6885 MIR6885 | 1.171371313  | 4.062365016 | 6.249990271     |
| 1.885508449     |              |             |                 |
| CCDC78 CCDC78   | 22.25605496  | 18.28064257 | 25.89281684     |
| 48.08046546     |              |             |                 |
| MIR6759 MIR6759 | 24.59879758  | 18.28064257 | 19.64282657     |
| 21.68334717     |              |             |                 |
| MIR6758 MIR6758 | 64.42542224  | 86.32525659 | 164.2854586     |
| 121.615295      |              |             |                 |

|              |              |             |   |             |             |             |   |
|--------------|--------------|-------------|---|-------------|-------------|-------------|---|
| MIR6757      | MIR6757      | 0           | 0 | 0.892855753 | 0           |             |   |
| MIR6768      | MIR6768      | 2.342742627 |   | 1.015591254 | 0           | 0           |   |
| MIR6767      | MIR6767      | 36.31251072 |   | 31.48332888 |             | 13.3928363  |   |
|              |              | 11.3130507  |   |             |             |             |   |
| MIR6766      | MIR6766      | 8.199599194 |   | 4.062365016 |             | 4.464278765 |   |
|              |              | 1.885508449 |   |             |             |             |   |
| MIR6838      | MIR6838      | 18.74194102 |   | 14.21827756 |             | 74.99988325 |   |
|              |              | 55.62249926 |   |             |             |             |   |
| MIR6847      | MIR6847      | 11.71371313 |   | 22.34300759 |             | 28.5713841  |   |
|              |              | 26.39711829 |   |             |             |             |   |
| LINC01212    | LINC01212    |             |   | 0           | 0           | 5.357134518 | 0 |
| LOC101060091 | LOC101060091 |             |   | 96.0524477  |             | 131.0112718 |   |
|              |              | 92.85699832 |   |             |             |             |   |
|              |              | 93.33266825 |   |             |             |             |   |
| C6orf7       | C6orf7       | 0           | 0 | 0           | 2.828262674 |             |   |
| LOC101927914 | LOC101927914 |             |   | 0           | 0           | 6.249990271 | 0 |
| MIR6770-2    | MIR6770-2    |             |   | 0           | 0           | 1.785711506 |   |
|              |              | 0.942754225 |   |             |             |             |   |
| LOC101929653 | LOC101929653 |             |   | 0           | 0           | 4.464278765 | 0 |
| LOC101929295 | LOC101929295 |             |   | 23.42742627 |             | 12.18709505 |   |
|              |              | 58.9284797  |   |             |             |             |   |
|              |              | 31.11088942 |   |             |             |             |   |
| LOC100129203 | LOC100129203 |             |   | 111.2802748 |             | 110.6994467 |   |
|              |              | 238.3924861 |   |             |             |             |   |
|              |              | 221.5472428 |   |             |             |             |   |
| PANDAR       | PANDAR       | 2.342742627 |   | 2.031182508 |             | 0           | 0 |
| RASSF1-AS1   | RASSF1-AS1   |             |   | 331.4980817 |             | 376.7843553 |   |
|              |              | 170.5354488 |   |             |             |             |   |
|              |              | 241.3450815 |   |             |             |             |   |
| LOC101927379 | LOC101927379 |             |   | 0           | 0           | 1.785711506 | 0 |
| LINC01176    | LINC01176    |             |   | 3.51411394  |             | 3.046773762 |   |
|              |              | 25.89281684 |   |             |             |             |   |
|              |              | 15.0840676  |   |             |             |             |   |
| LOC101926943 | LOC101926943 |             |   | 2558.274949 |             | 3283.406524 |   |
|              |              | 2267.853613 |   |             |             |             |   |
|              |              | 2118.368743 |   |             |             |             |   |
| LOC100506860 | LOC100506860 |             |   | 45.68348122 |             | 83.27848283 |   |
|              |              | 108.9284019 |   |             |             |             |   |
|              |              | 98.9891936  |   |             |             |             |   |
| LOC100147773 | LOC100147773 |             |   | 22.25605496 |             | 30.46773762 |   |
|              |              | 70.53560449 |   |             |             |             |   |
|              |              | 19.79783872 |   |             |             |             |   |
| TNKS2-AS1    | TNKS2-AS1    |             |   | 24.59879758 |             | 17.26505132 |   |
|              |              | 44.64278765 |   |             |             |             |   |
| HP09025      | HP09025      | 0           | 0 | 1.785711506 |             | 0           |   |
| MIR7109      | MIR7109      | 219.0464356 |   | 307.72415   |             | 374.9994163 |   |
|              |              | 312.9944026 |   |             |             |             |   |
| MIR7111      | MIR7111      | 67.93953618 |   | 64.99784026 |             | 95.53556557 |   |
|              |              | 93.33266825 |   |             |             |             |   |
| TDRG1        | TDRG1        | 4.685485254 |   | 1.015591254 |             | 20.53568232 |   |
|              |              | 11.3130507  |   |             |             |             |   |
| CSNK2A3      | CSNK2A3      | 17.5705697  |   | 30.46773762 |             | 10.71426904 |   |
|              |              | 16.02682182 |   |             |             |             |   |
| SRCIN1       | SRCIN1       | 2.342742627 |   | 1.015591254 |             | 0           | 0 |
| HLX-AS1      | HLX-AS1      | 1.171371313 |   | 0           | 0.892855753 | 0           |   |
| CTB-113P19.1 | CTB-113P19.1 |             |   | 0           | 0           | 3.571423012 | 0 |
| LOC101929657 | LOC101929657 |             |   | 11.71371313 |             | 7.109138778 |   |
|              |              | 2.678567259 |   |             |             |             |   |
|              |              | 20.74059294 |   |             |             |             |   |

|                 |              |             |             |             |             |
|-----------------|--------------|-------------|-------------|-------------|-------------|
| USP12-AS2       | USP12-AS2    | 1.171371313 | 10.15591254 |             |             |
| 1.785711506     | 0            |             |             |             |             |
| LOC101929608    | LOC101929608 | 4.685485254 | 28.43655511 |             |             |
| 75.89273901     | 50.90872813  |             |             |             |             |
| LOC101928020    | LOC101928020 | 16.39919839 | 9.140321286 |             |             |
| 58.03562395     | 28.28262674  |             |             |             |             |
| MIR6886 MIR6886 | 5.856856567  | 4.062365016 | 3.571423012 |             |             |
| 7.542033798     |              |             |             |             |             |
| LOC101929526    | LOC101929526 | 1.171371313 | 0           | 0           |             |
| 2.828262674     |              |             |             |             |             |
| LOC101927797    | LOC101927797 | 0           | 0           | 0.892855753 | 0           |
| CTB-1202.1      | CTB-1202.1   | 0           | 1.015591254 | 0           |             |
| 0.942754225     |              |             |             |             |             |
| LOC101927735    | LOC101927735 | 0           | 0           | 1.785711506 | 0           |
| ANKRD44-IT1     | ANKRD44-IT1  | 51.54033779 | 37.5768764  |             |             |
| 56.24991244     | 61.27902461  |             |             |             |             |
| DARS-AS1        | DARS-AS1     | 603.2562264 | 706.8515128 |             |             |
| 726.784583      | 751.3751171  |             |             |             |             |
| LOC101927257    | LOC101927257 | 17.5705697  | 8.124730032 |             |             |
| 13.3928363      | 12.25580492  |             |             |             |             |
| LOC101927869    | LOC101927869 | 0           | 0           | 0           | 0.942754225 |
| LOC101927631    | LOC101927631 | 45.68348122 | 63.98224901 |             |             |
| 66.07132572     | 57.50800771  |             |             |             |             |
| LOC101927770    | LOC101927770 | 5.856856567 | 1.015591254 |             |             |
| 4.464278765     | 10.37029647  |             |             |             |             |
| LOC101927418    | LOC101927418 | 1.171371313 | 0           | 0           |             |
| 1.885508449     |              |             |             |             |             |
| LINC01234       | LINC01234    | 1.171371313 | 0           | 0           | 0           |
| LOC101928435    | LOC101928435 | 1.171371313 | 0           | 0           | 0           |
| METRNL METRNL   | 58.56856567  | 19.29623383 | 95.53556557 |             |             |
| 133.8710999     |              |             |             |             |             |
| LOC100996579    | LOC100996579 | 128.8508445 | 110.6994467 |             |             |
| 61.60704696     | 48.08046546  |             |             |             |             |
| LOC100505921    | LOC100505921 | 30.45565415 | 40.62365016 |             |             |
| 33.92851862     | 45.25220279  |             |             |             |             |
| LOC101927630    | LOC101927630 | 0           | 2.031182508 | 0           | 0           |
| CTC-436P18.1    | CTC-436P18.1 | 378.3529342 | 498.6553057 |             |             |
| 398.2136659     | 428.010418   |             |             |             |             |
| SUCLG2-AS1      | SUCLG2-AS1   | 89.02421982 | 100.5435342 |             |             |
| 148.214055      | 89.56165135  |             |             |             |             |
| ALMS1-IT1       | ALMS1-IT1    | 9.370970508 | 5.07795627  |             |             |
| 2.678567259     | 0            |             |             |             |             |
| LOC101927668    | LOC101927668 | 11.71371313 | 7.109138778 |             | 0           |
| 6.599279573     |              |             |             |             |             |
| DPYD-AS2        | DPYD-AS2     | 5.856856567 | 0           | 3.571423012 |             |
| 6.599279573     |              |             |             |             |             |
| KCNC4-AS1       | KCNC4-AS1    | 11.71371313 | 0           | 0.892855753 |             |
| 1.885508449     |              |             |             |             |             |
| LOC101928767    | LOC101928767 | 51.54033779 | 58.90429273 |             |             |
| 88.39271955     | 93.33266825  |             |             |             |             |

|              |              |             |             |             |             |
|--------------|--------------|-------------|-------------|-------------|-------------|
| LOC101929607 | LOC101929607 | 0           | 0           | 0.892855753 |             |
| 0.942754225  |              |             |             |             |             |
| USP32P2      | USP32P2      | 0           | 3.046773762 | 13.3928363  | 0           |
| TRPM2-AS     | TRPM2-AS     | 0           | 10.15591254 | 0           | 0           |
| LOC101929591 | LOC101929591 | 5.856856567 |             | 1.015591254 |             |
| 5.357134518  | 0            |             |             |             |             |
| CTC-338M12.4 | CTC-338M12.4 | 172.1915831 |             | 114.7618117 |             |
| 166.0711701  | 179.1233027  |             |             |             |             |
| LOC101929319 | LOC101929319 | 0           | 0           | 19.64282657 |             |
| 0.942754225  |              |             |             |             |             |
| LOC101929452 | LOC101929452 | 0           | 0           | 1.785711506 |             |
| 6.599279573  |              |             |             |             |             |
| LOC101927021 | LOC101927021 | 549.373146  |             | 432.6418742 |             |
| 383.9279738  | 423.2966469  |             |             |             |             |
| LOC101927045 | LOC101927045 | 237.7883766 |             | 234.6015797 |             |
| 222.3210825  | 234.745802   |             |             |             |             |
| LOC101928002 | LOC101928002 | 0           | 2.031182508 | 1.785711506 |             |
| 5.656525348  |              |             |             |             |             |
| ADNP-AS1     | ADNP-AS1     | 43.3407386  |             | 58.90429273 |             |
| 61.60704696  | 49.02321969  |             |             |             |             |
| IL7R         | IL7R         | 2271.288977 | 916.0633112 | 14758.9056  |             |
| 18119.7362   |              |             |             |             |             |
| FBX033       | FBX033       | 2396.625707 | 2225.160438 | 2059.818222 |             |
| 2127.796285  |              |             |             |             |             |
| ARNTL2-AS1   | ARNTL2-AS1   | 258.8730603 |             | 475.2967069 |             |
| 104.4641231  | 130.100083   |             |             |             |             |
| LOC101927391 | LOC101927391 | 4.685485254 |             | 7.109138778 |             |
| 63.39275847  | 23.56885562  |             |             |             |             |
| ZBTB46-AS1   | ZBTB46-AS1   | 0           | 0           | 2.678567259 |             |
| 3.771016899  |              |             |             |             |             |
| LINC00211    | LINC00211    | 0           | 0           | 0           | 0.942754225 |
| LOC101927497 | LOC101927497 | 91.36696245 |             | 66.01343151 |             |
| 58.9284797   | 58.45076193  |             |             |             |             |
| LOC101926928 | LOC101926928 | 0           | 0           | 0           | 1.885508449 |
| LOC101928731 | LOC101928731 | 1.171371313 |             | 3.046773762 |             |
| 0.892855753  | 0.942754225  |             |             |             |             |
| LOC101927550 | LOC101927550 | 212.0182077 |             | 202.1026596 |             |
| 240.1781976  | 214.9479632  |             |             |             |             |
| DCTPP1       | DCTPP1       | 6215.296189 | 8824.472406 | 4806.242519 |             |
| 5199.289549  |              |             |             |             |             |
| RP9          | RP9          | 475.5767533 | 658.1031326 | 808.0344565 |             |
| 697.6381263  |              |             |             |             |             |
| LOC100996654 | LOC100996654 | 3.51411394  |             | 18.28064257 |             |
| 11.60712479  | 2.828262674  |             |             |             |             |
| LOC101927243 | LOC101927243 | 1.171371313 |             | 5.07795627  |             |
| 10.71426904  | 6.599279573  |             |             |             |             |
| LOC101928283 | LOC101928283 | 0           | 0           | 0.892855753 | 0           |
| LOC101927053 | LOC101927053 | 0           | 0           | 24.99996108 |             |
| 50.90872813  |              |             |             |             |             |
| LINC01267    | LINC01267    | 0           | 0           | 0           | 2.828262674 |



|                 |               |               |             |   |
|-----------------|---------------|---------------|-------------|---|
| LOC101928909    | LOC101928909  | 10.54234182   | 15.23386881 |   |
| 16.07140355     | 20.74059294   |               |             |   |
| LOC101927795    | LOC101927795  | 1047.205954   | 1136.446613 |   |
| 978.5699053     | 1000.262232   |               |             |   |
| RPRM RPRM       | 0 1.015591254 | 36.60708587   | 0           |   |
| GLT1D1 GLT1D1   | 235.445634    | 124.9177242   | 18.74997081 |   |
| 36.76741476     |               |               |             |   |
| LOC101927746    | LOC101927746  | 46.85485254   | 71.09138778 |   |
| 41.96422039     | 27.33987252   |               |             |   |
| UBXN10-AS1      | UBXN10-AS1    | 53.88308042   | 54.84192772 |   |
| 27.67852834     | 70.70656685   |               |             |   |
| LOC101929010    | LOC101929010  | 208.5040938   | 120.8553592 |   |
| 152.6783338     | 252.6581322   |               |             |   |
| LOC101927811    | LOC101927811  | 25.7701689    | 42.65483267 | 0 |
| 0.942754225     |               |               |             |   |
| RRP7A RRP7A     | 10525.94262   | 11782.88973   | 7345.52428  |   |
| 10857.70041     |               |               |             |   |
| DEPDC1-AS1      | DEPDC1-AS1    | 7.028227881   | 12.18709505 | 0 |
| 14.14131337     |               |               |             |   |
| LOC101927865    | LOC101927865  | 2.342742627   | 6.093547524 |   |
| 7.142846024     | 0             |               |             |   |
| ST3GAL5-AS1     | ST3GAL5-AS1   | 0 6.093547524 | 23.21424958 |   |
| 1.885508449     |               |               |             |   |
| LOC101928495    | LOC101928495  | 0 0           | 0.892855753 | 0 |
| SNORD43 SNORD43 | 2.342742627   | 11.17150379   | 10.71426904 |   |
| 12.25580492     |               |               |             |   |
| SNORD54 SNORD54 | 8.199599194   | 10.15591254   | 52.67848943 |   |
| 21.68334717     |               |               |             |   |
| SNORA33 SNORA33 | 21.08468364   | 9.140321286   | 16.96425931 |   |
| 23.56885562     |               |               |             |   |
| LINC01273       | LINC01273     | 0 0           | 0.892855753 | 0 |
| ZCCHC14 ZCCHC14 | 58.56856567   | 60.93547524   | 273.2138604 |   |
| 215.8907175     |               |               |             |   |
| RFTN1 RFTN1     | 7711.137357   | 8786.89553    | 6849.989337 |   |
| 6161.841613     |               |               |             |   |
| TET3 TET3       | 309.2420268   | 132.026863    | 330.3566286 |   |
| 214.005209      |               |               |             |   |
| ERICH3 ERICH3   | 0 1.015591254 | 0.892855753   | 0           |   |
| SCAMP1-AS1      | SCAMP1-AS1    | 303.3851702   | 241.7107185 |   |
| 378.5708393     | 480.8046546   |               |             |   |
| PLS3-AS1        | PLS3-AS1      | 8.199599194   | 0 0         | 0 |
| LINC01284       | LINC01284     | 0 0           | 3.571423012 | 0 |
| RASL10B RASL10B | 2.342742627   | 0 0           | 5.656525348 |   |
| SUZ12 SUZ12     | 5814.6872     | 2904.590987   | 2638.38875  |   |
| 3063.008476     |               |               |             |   |
| SBF1P1 SBF1P1   | 1.171371313   | 0 0           | 0           |   |
| TMED10P1        | TMED10P1      | 57.39719436   | 42.65483267 |   |
| 132.1426514     | 141.4131337   |               |             |   |
| VWF VWF         | 10.54234182   | 2.031182508   | 0 0         |   |
| MGC16142        | MGC16142      | 48.02622385   | 22.34300759 |   |

|                           |               |               |               |   |  |
|---------------------------|---------------|---------------|---------------|---|--|
| 100.8927001               | 47.13771124   |               |               |   |  |
| ZNF766 ZNF766             | 1892.936043   | 2057.587881   | 4992.849371   |   |  |
| 4248.050537               |               |               |               |   |  |
| GRHL1 GRHL1               | 163.9919839   | 110.6994467   | 135.7140745   |   |  |
| 84.84788022               |               |               |               |   |  |
| OR2AE1 OR2AE1             | 0 3.046773762 | 0             | 0             |   |  |
| FAM109B FAM109B           | 133.5363297   | 161.4790094   | 216.0710922   |   |  |
| 195.1501245               |               |               |               |   |  |
| PPP1R27 PPP1R27           | 1.171371313   | 6.093547524   | 1.785711506   | 0 |  |
| NKAPL NKAPL               | 2.342742627   | 14.21827756   | 57.14276819   |   |  |
| 21.68334717               |               |               |               |   |  |
| CDRT15 CDRT15             | 3.51411394    | 12.18709505   | 7.142846024   |   |  |
| 1.885508449               |               |               |               |   |  |
| F8A3 F8A3                 | 607.9417117   | 680.4461402   | 740.1774193   |   |  |
| 877.7041832               |               |               |               |   |  |
| IGIP IGIP                 | 19.91331233   | 8.124730032   | 32.14280711   |   |  |
| 45.25220279               |               |               |               |   |  |
| C8orf48 C8orf48           | 1.171371313   | 0 0           | 2.828262674   |   |  |
| ITGA11 ITGA11             | 0 5.07795627  | 0             | 0             |   |  |
| FAM227A FAM227A           | 7.028227881   | 9.140321286   | 7.142846024   |   |  |
| 1.885508449               |               |               |               |   |  |
| LKAAEAR1 LKAAEAR1         | 0 5.07795627  | 7.142846024   |               |   |  |
| 5.656525348               |               |               |               |   |  |
| TMEM220 TMEM220           | 26.94154021   | 25.38978135   | 215.1782365   |   |  |
| 171.5812689               |               |               |               |   |  |
| KRTAP5-1 KRTAP5-1         | 0 0           | 0             | 2.828262674   |   |  |
| OR2A7 OR2A7               | 1.171371313   | 8.124730032   | 0.892855753   | 0 |  |
| OR2A1 OR2A1               | 2.342742627   | 6.093547524   | 0 0           |   |  |
| LOC101927237 LOC101927237 | 0 0           | 0.892855753   | 0             |   |  |
| OR52N2 OR52N2             | 0 0           | 1.785711506   | 0             |   |  |
| PAGE2B PAGE2B             | 3.51411394    | 4.062365016   | 4.464278765   |   |  |
| 0.942754225               |               |               |               |   |  |
| OR2F2 OR2F2               | 0 0           | 0 0.942754225 |               |   |  |
| OR2D3 OR2D3               | 0 2.031182508 | 0 0           |               |   |  |
| OR2AG2 OR2AG2             | 2.342742627   | 6.093547524   | 0 13.19855915 |   |  |
| STAM-AS1 STAM-AS1         | 57.39719436   | 61.9510665    |               |   |  |
| 85.71415229               | 25.45436407   |               |               |   |  |
| LINC01169 LINC01169       | 0 3.046773762 | 0 0           | 0             |   |  |
| MIR133A1HG MIR133A1HG     | 12.88508445   | 6.093547524   |               |   |  |
| 11.60712479               | 20.74059294   |               |               |   |  |
| PRKX-AS1 PRKX-AS1         | 3.51411394    | 13.2026863    |               |   |  |
| 6.249990271               | 10.37029647   |               |               |   |  |
| MED140S MED140S           | 45.68348122   | 48.74838019   | 48.21421066   |   |  |
| 27.33987252               |               |               |               |   |  |
| HCFC1-AS1 HCFC1-AS1       | 2.342742627   | 10.15591254   |               |   |  |
| 4.464278765               | 18.85508449   |               |               |   |  |
| MID1IP1-AS1 MID1IP1-AS1   | 14.05645576   | 10.15591254   |               |   |  |
| 10.71426904               | 10.37029647   |               |               |   |  |
| ZNF630-AS1 ZNF630-AS1     | 0 0           | 5.357134518   | 0             |   |  |
| LOC101927780 LOC101927780 | 14.05645576   | 15.23386881   |               |   |  |

|                 |              |             |             |             |   |
|-----------------|--------------|-------------|-------------|-------------|---|
| 10.71426904     | 4.713771124  |             |             |             |   |
| PM20D2 PM20D2   | 1047.205954  | 347.3322089 | 891.9628973 |             |   |
| 1372.650151     |              |             |             |             |   |
| LOC100505592    | LOC100505592 | 0           | 3.046773762 | 0           |   |
| 4.713771124     |              |             |             |             |   |
| DDX26B-AS1      | DDX26B-AS1   | 14.05645576 | 11.17150379 |             |   |
| 13.3928363      | 8.484788022  |             |             |             |   |
| LOC101927178    | LOC101927178 | 1121.002347 | 1091.760598 |             |   |
| 988.3913186     | 1141.675366  |             |             |             |   |
| LINC01186       | LINC01186    | 0           | 1.015591254 | 0           | 0 |
| RTCA-AS1        | RTCA-AS1     | 46.85485254 | 50.7795627  |             |   |
| 45.5356434      | 49.02321969  |             |             |             |   |
| RP11-87M18.2    | RP11-87M18.2 | 0           | 0           | 0.892855753 | 0 |
| HAGLROS HAGLROS | 2.342742627  | 4.062365016 | 0           | 0           |   |
| LOC101929760    | LOC101929760 | 26.94154021 | 10.15591254 |             |   |
| 34.82137437     | 47.13771124  |             |             |             |   |
| LOC102724190    | LOC102724190 | 0           | 0           | 6.249990271 | 0 |
| LOC102724153    | LOC102724153 | 132.3649584 | 138.1204106 |             |   |
| 120.5355267     | 222.489997   |             |             |             |   |
| LINC01422       | LINC01422    | 2.342742627 | 0           | 4.464278765 |   |
| 0               |              |             |             |             |   |
| OTUD6B-AS1      | OTUD6B-AS1   | 1164.343086 | 1088.713824 |             |   |
| 2556.246021     | 2051.433193  |             |             |             |   |
| MIRLET7BHG      | MIRLET7BHG   | 9.370970508 | 6.093547524 |             |   |
| 118.7498152     | 46.19495701  |             |             |             |   |
| EP300-AS1       | EP300-AS1    | 8.199599194 | 31.48332888 |             |   |
| 19.64282657     | 51.85148236  |             |             |             |   |
| PADI6 PADI6     | 0 0          | 0           | 3.771016899 |             |   |
| LOC101927069    | LOC101927069 | 340.8690522 | 545.3725034 |             |   |
| 54.46420093     | 63.16453306  |             |             |             |   |
| LOC102723854    | LOC102723854 | 0           | 0           | 1.785711506 |   |
| 9.427542247     |              |             |             |             |   |
| LOC101929512    | LOC101929512 | 18.74194102 | 9.140321286 |             |   |
| 4.464278765     | 15.0840676   |             |             |             |   |
| LOC102723927    | LOC102723927 | 7.028227881 | 4.062365016 |             | 0 |
|                 | 3.771016899  |             |             |             |   |
| MIATNB MIATNB   | 197.961752   | 132.026863  | 216.963948  |             |   |
| 169.6957604     |              |             |             |             |   |
| HORMAD2-AS1     | HORMAD2-AS1  | 140.5645576 | 102.5747167 |             |   |
| 199.9996887     | 251.715378   |             |             |             |   |
| LANCL1-AS1      | LANCL1-AS1   | 2.342742627 | 2.031182508 |             |   |
| 2.678567259     | 3.771016899  |             |             |             |   |
| LOC102724691    | LOC102724691 | 3.51411394  | 2.031182508 |             |   |
| 3.571423012     | 1.885508449  |             |             |             |   |
| CHKB-AS1        | CHKB-AS1     | 114.7943887 | 194.9935208 |             |   |
| 333.9280516     | 268.684954   |             |             |             |   |
| LOC102723824    | LOC102723824 | 29.28428284 | 33.51451138 |             |   |
| 11.60712479     | 32.99639787  |             |             |             |   |
| ITGA9-AS1       | ITGA9-AS1    | 11.71371313 | 3.046773762 |             |   |
| 7.142846024     | 5.656525348  |             |             |             |   |

|               |               |             |             |             |  |
|---------------|---------------|-------------|-------------|-------------|--|
| CHMP1B2P      | CHMP1B2P      | 1.171371313 | 0           | 2.678567259 |  |
| 0             |               |             |             |             |  |
| LRCH4 LRCH4   | 5080.237386   | 5774.651871 | 4241.957683 |             |  |
| 4274.447655   |               |             |             |             |  |
| ZASP ZASP     | 906.6413966   | 1048.090174 | 708.9274679 |             |  |
| 741.0048206   |               |             |             |             |  |
| PSMB11 PSMB11 | 0 1.015591254 | 0           | 0           |             |  |
| POTEF POTEF   | 2.342742627   | 6.093547524 | 1.785711506 |             |  |
| 4.713771124   |               |             |             |             |  |
| LOC101928063  | LOC101928063  | 161.6492413 | 106.6370817 |             |  |
| 199.9996887   | 293.1965639   |             |             |             |  |
| LOC101927143  | LOC101927143  | 1.171371313 | 1.015591254 |             |  |
| 0.892855753   | 2.828262674   |             |             |             |  |
| LOC102723809  | LOC102723809  | 55.05445173 | 34.53010264 |             |  |
| 52.67848943   | 57.50800771   |             |             |             |  |
| LOC102723354  | LOC102723354  | 10.54234182 | 2.031182508 |             |  |
| 8.035701777   | 14.14131337   |             |             |             |  |
| LOC101928517  | LOC101928517  | 0 0         | 4.464278765 | 0           |  |
| LOC101929715  | LOC101929715  | 24.59879758 | 12.18709505 |             |  |
| 32.14280711   | 29.22538097   |             |             |             |  |
| C10orf90      | C10orf90      | 0 0         | 0           | 1.885508449 |  |
| GLTPD2 GLTPD2 | 3.51411394    | 11.17150379 | 8.92855753  |             |  |
| 10.37029647   |               |             |             |             |  |
| COA5 COA5     | 1266.25239    | 1067.386408 | 1344.640764 |             |  |
| 1544.23142    |               |             |             |             |  |
| C20orf202     | C20orf202     | 1.171371313 | 0           | 8.92855753  |  |
| 4.713771124   |               |             |             |             |  |
| JMJD8 JMJD8   | 5917.767876   | 8372.534298 | 7235.703023 |             |  |
| 7078.198719   |               |             |             |             |  |
| CSE1L-AS1     | CSE1L-AS1     | 3.51411394  | 12.18709505 |             |  |
| 6.249990271   | 2.828262674   |             |             |             |  |
| LOC101927322  | LOC101927322  | 366.6392211 | 288.4279162 |             |  |
| 283.0352737   | 267.7421998   |             |             |             |  |
| LOC101929733  | LOC101929733  | 0 0         | 0.892855753 | 0           |  |
| LOC101927274  | LOC101927274  | 0 0         | 2.678567259 | 0           |  |
| LOC101927720  | LOC101927720  | 7.028227881 | 21.32741634 |             |  |
| 118.7498152   | 63.16453306   |             |             |             |  |
| KCTD2 KCTD2   | 1434.929859   | 778.9584919 | 1076.784038 |             |  |
| 965.3803261   |               |             |             |             |  |
| LOC100996324  | LOC100996324  | 130.0222158 | 168.5881482 |             |  |
| 103.5712674   | 114.0732612   |             |             |             |  |
| LINC01232     | LINC01232     | 45.68348122 | 34.53010264 |             |  |
| 54.46420093   | 41.48118589   |             |             |             |  |
| DSCAS DSCAS   | 0 0           | 0           | 1.885508449 |             |  |
| LOC101927571  | LOC101927571  | 10.54234182 | 11.17150379 |             |  |
| 2.678567259   | 0.942754225   |             |             |             |  |
| LOC101927166  | LOC101927166  | 18.74194102 | 6.093547524 |             |  |
| 0.892855753   | 10.37029647   |             |             |             |  |
| HID1-AS1      | HID1-AS1      | 0 0         | 5.357134518 | 0           |  |
| NUCB1-AS1     | NUCB1-AS1     | 2101.440136 | 2000.71477  |             |  |

|                 |              |             |             |             |   |
|-----------------|--------------|-------------|-------------|-------------|---|
| 1541.961885     | 1795.004044  |             |             |             |   |
| LOC101928571    | LOC101928571 | 57.39719436 |             | 74.13816155 |   |
| 149.1069108     | 120.6725408  |             |             |             |   |
| NDUFV2-AS1      | NDUFV2-AS1   | 29.28428284 |             | 28.43655511 |   |
| 172.3211603     | 97.10368515  |             |             |             |   |
| MAP3K14 MAP3K14 | 5070.866416  | 2883.26357  |             | 2965.173956 |   |
| 3264.75788      |              |             |             |             |   |
| TIMM23B TIMM23B | 595.0566272  | 538.2633646 |             | 558.9277014 |   |
| 639.1873644     |              |             |             |             |   |
| GPR89B GPR89B   | 145.2500429  | 146.2451406 |             | 231.24964   |   |
| 192.3218618     |              |             |             |             |   |
| CELA2B CELA2B   | 12.88508445  | 11.17150379 |             | 8.035701777 |   |
| 4.713771124     |              |             |             |             |   |
| RYBP RYBP       | 822.302662   | 343.2698439 |             | 405.3565119 |   |
| 526.9996116     |              |             |             |             |   |
| LOC101929224    | LOC101929224 | 4.685485254 |             | 17.26505132 |   |
| 11.60712479     | 12.25580492  |             |             |             |   |
| LOC102724246    | LOC102724246 | 31.62702546 |             | 24.3741901  |   |
| 74.99988325     | 101.8174563  |             |             |             |   |
| LOC101928710    | LOC101928710 | 67.93953618 |             | 28.43655511 |   |
| 14.28569205     | 35.82466054  |             |             |             |   |
| HP09053 HP09053 | 418.1795589  | 657.0875414 |             | 515.1777695 |   |
| 490.2321969     |              |             |             |             |   |
| LOC101927911    | LOC101927911 | 62.08267961 |             | 36.56128515 |   |
| 27.67852834     | 5.656525348  |             |             |             |   |
| GFER GFER       | 982.780532   | 1058.246087 |             | 661.606113  |   |
| 803.2265995     |              |             |             |             |   |
| HAGHL HAGHL     | 107.7661608  | 28.43655511 |             | 58.03562395 |   |
| 82.01961755     |              |             |             |             |   |
| LINC01352       | LINC01352    | 0           | 0           | 0.892855753 |   |
| 0.942754225     |              |             |             |             |   |
| LOC100507002    | LOC100507002 | 38.65525334 |             | 39.60805891 |   |
| 21.42853807     | 16.02682182  |             |             |             |   |
| LINC01504       | LINC01504    | 11.71371313 |             | 14.21827756 | 0 |
| 0               |              |             |             |             |   |
| LOC101927018    | LOC101927018 | 9.370970508 |             | 1.015591254 |   |
| 8.92855753      | 5.656525348  |             |             |             |   |
| LOC101926996    | LOC101926996 | 12.88508445 |             | 5.07795627  |   |
| 21.42853807     | 3.771016899  |             |             |             |   |
| TMEM108-AS1     | TMEM108-AS1  | 0           | 0           | 0.892855753 | 0 |
| LOC101927688    | LOC101927688 | 4.685485254 |             | 14.21827756 |   |
| 5.357134518     | 21.68334717  |             |             |             |   |
| LOC101927666    | LOC101927666 | 0           | 3.046773762 | 0           | 0 |
| LOC101927557    | LOC101927557 | 3.51411394  |             | 1.015591254 | 0 |
| 7.542033798     |              |             |             |             |   |
| LOC101927539    | LOC101927539 | 1.171371313 |             | 2.031182508 | 0 |
| 7.542033798     |              |             |             |             |   |
| LOC101927730    | LOC101927730 | 289.3287144 |             | 394.0494066 |   |
| 816.0701583     | 597.7061785  |             |             |             |   |
| LOC101927829    | LOC101927829 | 3.51411394  |             | 4.062365016 |   |

|              |              |             |             |             |             |
|--------------|--------------|-------------|-------------|-------------|-------------|
| 5.357134518  | 0.942754225  |             |             |             |             |
| LOC101928514 | LOC101928514 | 0           | 2.031182508 | 6.249990271 |             |
|              | 2.828262674  |             |             |             |             |
| LOC100420587 | LOC100420587 | 9.370970508 | 2.031182508 | 0           |             |
|              | 15.0840676   |             |             |             |             |
| LOC101928163 | LOC101928163 | 427.5505294 | 263.0381348 |             |             |
| 35.71423012  | 61.27902461  |             |             |             |             |
| C19orf48     | C19orf48     | 6297.292181 | 8463.937511 |             |             |
| 5807.133818  | 5031.479297  |             |             |             |             |
| CCR7         | CCR7         | 16658.07145 | 29891.89738 | 62947.22344 |             |
| 41799.83682  |              |             |             |             |             |
| LOC101929099 | LOC101929099 | 201.4758659 | 266.0849086 |             |             |
| 138.3926417  | 131.0428372  |             |             |             |             |
| LOC101928266 | LOC101928266 | 1.171371313 | 0           | 0           | 0           |
| MYADM        | MYADM        | 2334.543028 | 1338.549273 | 1741.068718 |             |
| 2226.785479  |              |             |             |             |             |
| SRGAP3-AS3   | SRGAP3-AS3   | 7.028227881 | 0           | 0           | 0           |
| C1orf115     | C1orf115     | 19.91331233 | 67.02902277 |             |             |
| 238.3924861  | 72.5920753   |             |             |             |             |
| AGRN         | AGRN         | 79.65324932 | 21.32741634 | 30.3570956  |             |
| 60.33627038  |              |             |             |             |             |
| LOC102724508 | LOC102724508 | 2.342742627 | 0           | 12.49998054 |             |
|              | 1.885508449  |             |             |             |             |
| LOC101929555 | LOC101929555 | 11.71371313 | 2.031182508 | 0           |             |
|              | 0.942754225  |             |             |             |             |
| LOC101929420 | LOC101929420 | 0           | 1.015591254 | 0           | 0           |
| LOC101929767 | LOC101929767 | 77.31050669 | 78.20052656 |             |             |
| 76.78559476  | 55.62249926  |             |             |             |             |
| LOC101926950 | LOC101926950 | 0           | 0           | 0           | 0.942754225 |
| LOC101926896 | LOC101926896 | 0           | 0           | 0.892855753 | 0           |
| LOC102724596 | LOC102724596 | 21.08468364 | 11.17150379 |             |             |
| 19.64282657  | 22.62610139  |             |             |             |             |
| RARA-AS1     | RARA-AS1     | 17.5705697  | 22.34300759 |             |             |
| 0.892855753  | 13.19855915  |             |             |             |             |
| TSPAN10      | TSPAN10      | 3.51411394  | 3.046773762 | 8.035701777 |             |
| 8.484788022  |              |             |             |             |             |
| LOC101927087 | LOC101927087 | 0           | 0           | 0           | 0.942754225 |
| LOC101927755 | LOC101927755 | 66.76816487 | 53.82633646 |             |             |
| 33.92851862  | 34.88190631  |             |             |             |             |
| LOC101927691 | LOC101927691 | 0           | 0           | 0           | 3.771016899 |
| LOC101928001 | LOC101928001 | 5.856856567 | 3.046773762 |             |             |
| 7.142846024  | 4.713771124  |             |             |             |             |
| LOC101927919 | LOC101927919 | 24.59879758 | 27.42096386 |             |             |
| 27.67852834  | 14.14131337  |             |             |             |             |
| LOC101929717 | LOC101929717 | 23.42742627 | 17.26505132 |             |             |
| 28.5713841   | 28.28262674  |             |             |             |             |
| LOC102724550 | LOC102724550 | 0           | 0           | 2.678567259 | 0           |
| LOC101927950 | LOC101927950 | 5.856856567 | 0           | 4.464278765 |             |
| 0            |              |             |             |             |             |
| LOC101928674 | LOC101928674 | 19.91331233 | 12.18709505 |             |             |

|                 |              |             |             |   |             |
|-----------------|--------------|-------------|-------------|---|-------------|
| 19.64282657     | 13.19855915  |             |             |   |             |
| LOC101928855    | LOC101928855 | 22.25605496 | 20.31182508 |   |             |
| 0.892855753     | 17.91233027  |             |             |   |             |
| LOC101928766    | LOC101928766 | 0           | 2.031182508 | 0 | 0           |
| PHF20 PHF20     | 1880.050958  | 2142.897546 | 3599.994396 |   |             |
| 2883.885173     |              |             |             |   |             |
| ZSCAN22 ZSCAN22 | 696.9659315  | 604.2767962 | 570.5348262 |   |             |
| 850.3643107     |              |             |             |   |             |
| ERCC6L ERCC6L   | 1603.607328  | 1684.86589  | 742.8559865 |   |             |
| 915.4143522     |              |             |             |   |             |
| FBX02 FBX02     | 55.05445173  | 18.28064257 | 124.9998054 |   |             |
| 246.0588527     |              |             |             |   |             |
| FBX010 FBX010   | 322.1271112  | 181.7908345 | 62.49990271 |   |             |
| 248.8871153     |              |             |             |   |             |
| BAALC-AS1       | BAALC-AS1    | 3.51411394  | 3.046773762 |   | 0           |
| 0.942754225     |              |             |             |   |             |
| LINC00515       | LINC00515    | 16.39919839 | 11.17150379 |   |             |
| 16.96425931     | 16.02682182  |             |             |   |             |
| TMED7-TICAM2    | TMED7-TICAM2 | 1344.734268 | 1448.233128 |   |             |
| 1822.318592     | 1464.097311  |             |             |   |             |
| LMF1-AS1        | LMF1-AS1     | 56.22582305 | 57.88870148 |   |             |
| 168.7497373     | 141.4131337  |             |             |   |             |
| LOC553103       | LOC553103    | 28.11291152 | 49.76397145 |   |             |
| 74.99988325     | 73.53482953  |             |             |   |             |
| LOC101927102    | LOC101927102 | 393.5807613 | 553.4972335 |   |             |
| 390.1779641     | 382.7582152  |             |             |   |             |
| LOC101927272    | LOC101927272 | 461.5202975 | 483.4214369 |   |             |
| 239.2853418     | 279.9980047  |             |             |   |             |
| LOC101928530    | LOC101928530 | 32.79839678 | 32.49892013 |   |             |
| 47.32135491     | 24.51160984  |             |             |   |             |
| LOC101927580    | LOC101927580 | 0           | 0           | 0 | 0.942754225 |
| CHRNA5 CHRNA5   | 405.2944745  | 421.4703704 | 225.8925055 |   |             |
| 353.5328343     |              |             |             |   |             |
| LOC101928737    | LOC101928737 | 1.171371313 | 4.062365016 |   | 0           |
| 7.542033798     |              |             |             |   |             |
| LOC101927817    | LOC101927817 | 78.481878   | 78.20052656 |   |             |
| 85.71415229     | 71.64932108  |             |             |   |             |
| NKPD1 NKPD1     | 2.342742627  | 6.093547524 | 44.64278765 |   |             |
| 21.68334717     |              |             |             |   |             |
| GALNT10 GALNT10 | 3419.232864  | 2225.160438 | 1858.032822 |   |             |
| 2394.595731     |              |             |             |   |             |
| S0CS7 S0CS7     | 173.3629544  | 67.02902277 | 162.4997471 |   |             |
| 92.38991402     |              |             |             |   |             |
| DENND1C DENND1C | 6014.991695  | 7099.998457 | 3103.566598 |   |             |
| 5229.457684     |              |             |             |   |             |
| LOC101060376    | LOC101060376 | 69.11090749 | 30.46773762 |   |             |
| 64.28561422     | 82.01961755  |             |             |   |             |
| VPREB1 VPREB1   | 3.51411394   | 0           | 0           | 0 |             |
| VCP VCP         | 50752.0049   | 73946.2148  | 38827.61813 |   |             |
| 38824.50448     |              |             |             |   |             |

|              |              |             |             |             |             |
|--------------|--------------|-------------|-------------|-------------|-------------|
| BRWD1-AS1    | BRWD1-AS1    | 0           | 5.07795627  | 0           | 0           |
| TEKT4P2      | TEKT4P2      | 80.82462063 | 72.10697904 | 42.85707615 |             |
| 87.6761429   |              |             |             |             |             |
| LINC01258    | LINC01258    | 1.171371313 | 6.093547524 |             | 0           |
| 13.19855915  |              |             |             |             |             |
| MAFIP        | MAFIP        | 100.737933  | 562.6375547 | 462.4992801 |             |
| 92.38991402  |              |             |             |             |             |
| LOC101927040 | LOC101927040 | 0           | 2.031182508 | 0           | 0           |
| LCMT1-AS1    | LCMT1-AS1    | 63.25405093 | 66.01343151 |             |             |
| 35.71423012  | 46.19495701  |             |             |             |             |
| KLHL31       | KLHL31       | 0           | 2.031182508 | 0           | 9.427542247 |
| FAM150B      | FAM150B      | 1.171371313 | 0           | 21.42853807 | 1.885508449 |
| KCTD11       | KCTD11       | 214.3609504 | 138.1204106 | 353.5708782 |             |
| 421.4111384  |              |             |             |             |             |
| CYP27C1      | CYP27C1      | 1.171371313 | 0           | 0           | 0           |
| OR5W2        | OR5W2        | 1.171371313 | 0           | 0           | 0           |
| OR11L1       | OR11L1       | 0           | 0           | 1.885508449 |             |
| OR2W3        | OR2W3        | 10.54234182 | 3.046773762 | 0           | 0           |
| ASTL         | ASTL         | 9.370970508 | 22.34300759 | 26.78567259 |             |
| 40.53843166  |              |             |             |             |             |
| C14orf37     | C14orf37     | 14.05645576 | 6.093547524 |             |             |
| 16.07140355  | 0.942754225  |             |             |             |             |
| OR2A42       | OR2A42       | 2.342742627 | 6.093547524 | 0           | 0           |
| C10orf55     | C10orf55     | 42.16936728 | 121.8709505 |             |             |
| 108.9284019  | 27.33987252  |             |             |             |             |
| LCN10        | LCN10        | 19.91331233 | 30.46773762 | 175.8925833 |             |
| 88.61889712  |              |             |             |             |             |
| MED11        | MED11        | 1048.377326 | 1268.473476 | 1342.855053 |             |
| 1044.571681  |              |             |             |             |             |
| SPOPL        | SPOPL        | 295.185571  | 171.6349219 | 181.2497179 |             |
| 304.5096146  |              |             |             |             |             |
| LYRM5        | LYRM5        | 501.3469222 | 298.5838287 | 858.0343787 |             |
| 948.4107501  |              |             |             |             |             |
| TIMM50       | TIMM50       | 4001.404407 | 5509.582553 | 3791.065527 |             |
| 3573.038512  |              |             |             |             |             |
| JARID2-AS1   | JARID2-AS1   | 9.370970508 | 3.046773762 |             |             |
| 0.892855753  | 6.599279573  |             |             |             |             |
| KCNQ5-IT1    | KCNQ5-IT1    | 15.22782708 | 13.2026863  |             |             |
| 8.035701777  | 11.3130507   |             |             |             |             |
| FAM223A      | FAM223A      | 5.856856567 | 1.015591254 | 4.464278765 |             |
| 6.599279573  |              |             |             |             |             |
| SEMA6A-AS1   | SEMA6A-AS1   | 5.856856567 | 10.15591254 |             |             |
| 6.249990271  | 25.45436407  |             |             |             |             |
| LOC102723885 | LOC102723885 | 2651.984654 | 3286.453298 |             |             |
| 1773.211526  | 2149.479632  |             |             |             |             |
| FER1L5       | FER1L5       | 0           | 0           | 28.5713841  | 24.51160984 |
| ELFN1-AS1    | ELFN1-AS1    | 3.51411394  | 22.34300759 |             |             |
| 15.1785478   | 0            |             |             |             |             |
| FNDC9        | FNDC9        | 39.82662466 | 16.24946006 | 55.35705669 |             |
| 82.96237177  |              |             |             |             |             |



|                 |              |             |             |             |
|-----------------|--------------|-------------|-------------|-------------|
| C14orf64        | C14orf64     | 473.2340106 | 416.3924142 |             |
| 741.9631308     | 774.0012185  |             |             |             |
| LINC01341       | LINC01341    | 0 0         | 7.142846024 | 0           |
| EXPH5 EXPH5     | 118.3085027  | 71.09138778 | 412.4993579 |             |
| 547.7402046     |              |             |             |             |
| LOC143666       | LOC143666    | 3.51411394  | 9.140321286 |             |
| 27.67852834     | 23.56885562  |             |             |             |
| LOC101927181    | LOC101927181 | 49.19759517 | 67.02902277 |             |
| 20.53568232     | 61.27902461  |             |             |             |
| CYP4F29P        | CYP4F29P     | 10.54234182 | 4.062365016 | 0           |
|                 | 10.37029647  |             |             |             |
| LINC00866       | LINC00866    | 3.51411394  | 0           | 3.571423012 |
| 0               |              |             |             |             |
| SFN SFN         | 5.856856567  | 6.093547524 | 2.678567259 |             |
| 0.942754225     |              |             |             |             |
| IRF9 IRF9       | 8295.651642  | 8403.002036 | 23004.42848 |             |
| 14583.4651      |              |             |             |             |
| MIR7110 MIR7110 | 15.22782708  | 10.15591254 | 0.892855753 |             |
| 4.713771124     |              |             |             |             |
| LINC00620       | LINC00620    | 0 0         | 8.035701777 | 0           |
| FAM120C FAM120C | 175.705697   | 136.089228  | 247.3210436 |             |
| 138.584871      |              |             |             |             |
| TNFSF9 TNFSF9   | 433.407386   | 609.3547524 | 658.03469   |             |
| 448.751011      |              |             |             |             |
| LOC101928794    | LOC101928794 | 10.54234182 | 4.062365016 |             |
| 40.17850889     | 12.25580492  |             |             |             |
| LOC101928068    | LOC101928068 | 12.88508445 | 4.062365016 |             |
| 19.64282657     | 1.885508449  |             |             |             |
| LOC388813       | LOC388813    | 1.171371313 | 2.031182508 |             |
| 16.07140355     | 24.51160984  |             |             |             |
| KIAA1161        | KIAA1161     | 240.1311193 | 284.3655511 |             |
| 244.6424763     | 194.2073703  |             |             |             |
| PNMA6A PNMA6A   | 0 0          | 0.892855753 | 0           |             |
| LOC100130691    | LOC100130691 | 101.9093043 | 69.06020528 |             |
| 83.92844078     | 166.8674978  |             |             |             |
| NOP16 NOP16     | 3562.140164  | 6469.316288 | 5063.384975 |             |
| 4478.082567     |              |             |             |             |
| RHOD RHOD       | 7.028227881  | 32.49892013 | 15.1785478  |             |
| 20.74059294     |              |             |             |             |
| LOC100506551    | LOC100506551 | 97.22381902 | 88.3564391  |             |
| 76.78559476     | 119.7297865  |             |             |             |
| LOC100132529    | LOC100132529 | 1.171371313 | 10.15591254 |             |
| 26.78567259     | 7.542033798  |             |             |             |
| LINC01301       | LINC01301    | 1.171371313 | 3.046773762 |             |
| 7.142846024     | 0.942754225  |             |             |             |
| LINC00869       | LINC00869    | 58.56856567 | 98.51235164 |             |
| 474.9992606     | 279.0552505  |             |             |             |
| BRWD1-IT2       | BRWD1-IT2    | 21.08468364 | 27.42096386 |             |
| 24.99996108     | 20.74059294  |             |             |             |
| FCGBP FCGBP     | 36.31251072  | 30.46773762 | 329.4637729 |             |

|              |              |             |             |             |             |
|--------------|--------------|-------------|-------------|-------------|-------------|
| 174.4095316  |              |             |             |             |             |
| AGAP4        | AGAP4        | 154.6210134 | 84.29407409 | 163.3926028 |             |
| 133.8710999  |              |             |             |             |             |
| C5orf34      | C5orf34      | 581.0001715 | 414.3612317 | 553.5705669 |             |
| 515.6865609  |              |             |             |             |             |
| GOLGA6L17P   | GOLGA6L17P   |             | 1.171371313 | 0           | 0.892855753 |
|              | 4.713771124  |             |             |             |             |
| CEP19        | CEP19        | 713.3651299 | 826.6912808 | 841.9629751 |             |
| 751.3751171  |              |             |             |             |             |
| FAM21A       | FAM21A       | 3018.623875 | 3397.152745 | 4444.635939 |             |
| 4048.186641  |              |             |             |             |             |
| LOC100132062 | LOC100132062 |             | 1.171371313 | 1.015591254 |             |
| 13.3928363   | 1.885508449  |             |             |             |             |
| GLUD1P7      | GLUD1P7      | 0           | 0           | 1.785711506 | 4.713771124 |
| LOC103091866 | LOC103091866 |             | 38.65525334 | 57.88870148 |             |
| 299.1066773  | 209.2914379  |             |             |             |             |
| GOLGA6L22    | GOLGA6L22    |             | 0           | 0           | 1.785711506 |
| LPGAT1       | LPGAT1       | 2473.936214 | 1738.692227 | 1508.926223 | 0           |
| 2002.409973  |              |             |             |             |             |
| SNORA4       | SNORA4       | 58.56856567 | 49.76397145 | 170.5354488 |             |
| 153.6689386  |              |             |             |             |             |
| SNORA63      | SNORA63      | 80.82462063 | 44.68601518 | 140.1783532 |             |
| 162.1537267  |              |             |             |             |             |
| SNORA52      | SNORA52      | 10.54234182 | 18.28064257 | 17.85711506 |             |
| 24.51160984  |              |             |             |             |             |
| SNORA7A      | SNORA7A      | 53.88308042 | 32.49892013 | 62.49990271 |             |
| 73.53482953  |              |             |             |             |             |
| SNORA72      | SNORA72      | 10.54234182 | 1.015591254 | 6.249990271 |             |
| 5.656525348  |              |             |             |             |             |
| TOP1P1       | TOP1P1       | 5.856856567 | 9.140321286 | 5.357134518 |             |
| 22.62610139  |              |             |             |             |             |
| CXCR2P1      | CXCR2P1      | 7.028227881 | 6.093547524 | 28.5713841  |             |
| 33.93915209  |              |             |             |             |             |
| SNORD60      | SNORD60      | 2.342742627 | 0           | 10.71426904 | 7.542033798 |
| PTTG3P       | PTTG3P       | 4.685485254 | 1.015591254 | 0           | 0           |
| BRD7P3       | BRD7P3       | 24.59879758 | 4.062365016 | 15.1785478  |             |
| 21.68334717  |              |             |             |             |             |
| HNRNPA3P1    | HNRNPA3P1    |             | 0           | 0           | 0.892855753 |
| INE2         | INE2         | 32.79839678 | 32.49892013 | 21.42853807 | 0           |
| 66.93554995  |              |             |             |             |             |
| SNORD53      | SNORD53      | 1.171371313 | 3.046773762 | 0.892855753 |             |
| 1.885508449  |              |             |             |             |             |
| SNORD59A     | SNORD59A     |             | 39.82662466 | 67.02902277 |             |
| 117.8569594  | 93.33266825  |             |             |             |             |
| SNORD45A     | SNORD45A     |             | 28.11291152 | 32.49892013 |             |
| 31.24995136  | 30.16813519  |             |             |             |             |
| SNORD45B     | SNORD45B     |             | 28.11291152 | 22.34300759 |             |
| 33.03566286  | 57.50800771  |             |             |             |             |
| SNORD47      | SNORD47      | 146.4214142 | 88.3564391  | 233.0353515 |             |
| 194.2073703  |              |             |             |             |             |

|              |              |             |             |             |             |
|--------------|--------------|-------------|-------------|-------------|-------------|
| SNORD48      | SNORD48      | 0           | 0           | 0.892855753 | 0           |
| SNORD49A     | SNORD49A     |             |             | 30.45565415 | 18.28064257 |
| 82.14272928  | 71.64932108  |             |             |             |             |
| LOC100506730 | LOC100506730 |             |             | 8.199599194 | 10.15591254 |
| 29.46423985  | 18.85508449  |             |             |             |             |
| LINC01006    | LINC01006    |             |             | 1.171371313 | 0           |
|              | 1.885508449  |             |             |             | 7.142846024 |
| EDNRB-AS1    | EDNRB-AS1    |             |             | 3.51411394  | 2.031182508 |
|              | 0            |             |             |             | 0           |
| SH3BGRL2     | SH3BGRL2     |             |             | 15.22782708 | 19.29623383 |
| 169.6425931  | 40.53843166  |             |             |             |             |
| LENG8        | LENG8        |             |             | 1144.429773 | 369.6752165 |
| 673.1265164  |              |             |             |             | 758.0345343 |
| PTPRH        | PTPRH        | 1.171371313 |             | 2.031182508 | 0           |
| MOXD1        | MOXD1        | 8.199599194 |             | 6.093547524 | 0           |
| KIAA2018     | KIAA2018     |             |             | 755.5344972 | 363.581669  |
| 625.8918829  | 814.5396502  |             |             |             |             |
| C1orf167     | C1orf167     |             |             | 94.88107639 | 115.777403  |
| 240.1781976  | 151.7834302  |             |             |             |             |
| PPP1R15B     | PPP1R15B     |             |             | 3532.855881 | 2433.356645 |
| 4228.564846  | 4457.341974  |             |             |             |             |
| RMDN2        | RMDN2        | 85.51010588 |             | 126.9489068 | 449.9992995 |
| 337.5060124  |              |             |             |             |             |
| RNF222       | RNF222       | 5.856856567 |             | 4.062365016 | 0           |
| KRTAP10-4    | KRTAP10-4    |             |             | 0           | 10.37029647 |
| BHLHE40-AS1  | BHLHE40-AS1  |             |             | 0           | 0.892855753 |
| 180.3568621  | 153.6689386  |             |             | 93.70970508 | 91.40321286 |
| MIR3652      | MIR3652      | 2470.4221   |             | 2738.034021 | 1899.997042 |
| 2095.742642  |              |             |             |             |             |
| PPP1R2       | PPP1R2       | 7768.534551 |             | 8712.757368 | 12797.30151 |
| 10190.23041  |              |             |             |             |             |
| HSD17B11     | HSD17B11     |             |             | 1354.105238 | 1241.052512 |
| 1574.104693  | 1638.506843  |             |             |             |             |
| DDX60L       | DDX60L       | 3234.156196 |             | 2050.478742 | 3803.565508 |
| 3801.185034  |              |             |             |             |             |
| SOWAHA       | SOWAHA       | 0           | 6.093547524 | 4.464278765 | 0           |
| HIVEP1       | HIVEP1       | 1315.449985 |             | 925.2036324 | 1133.033951 |
| 1448.070489  |              |             |             |             |             |
| FREM2        | FREM2        | 0           | 0           | 0.892855753 | 0           |
| SLC5A3       | SLC5A3       | 2981.139993 |             | 2289.142687 | 1730.354449 |
| 2425.70662   |              |             |             |             |             |
| FOCAD        | FOCAD        | 5086.094243 |             | 4951.007363 | 2138.389529 |
| 3123.344746  |              |             |             |             |             |
| PNPLA7       | PNPLA7       | 53.88308042 |             | 70.07579653 | 110.7141134 |
| 85.79063445  |              |             |             |             |             |
| PPCDC        | PPCDC        | 1735.972287 |             | 2419.138367 | 730.356006  |
| 922.956386   |              |             |             |             |             |
| CCDC53       | CCDC53       | 3838.583794 |             | 3904.948372 | 2222.317969 |
| 2575.604542  |              |             |             |             |             |
| KIAA2026     | KIAA2026     |             |             | 780.1332948 | 553.4972335 |

|                 |              |             |             |             |             |
|-----------------|--------------|-------------|-------------|-------------|-------------|
| 985.7127513     | 1009.689775  |             |             |             |             |
| IP09-AS1        | IP09-AS1     |             | 394.7521326 | 555.528416  |             |
| 312.4995136     | 370.5024103  |             |             |             |             |
| DOCK9-AS1       | DOCK9-AS1    |             | 0           | 0           | 3.571423012 |
| ZNF180 ZNF180   | 793.0183792  |             | 794.1923607 | 906.2485893 | 0           |
| 872.9904121     |              |             |             |             |             |
| ADRA2B ADRA2B   | 5.856856567  |             | 6.093547524 | 14.28569205 |             |
| 16.96957604     |              |             |             |             |             |
| SVILP1 SVILP1   | 349.0686514  |             | 419.4391879 | 358.9280127 |             |
| 426.1249096     |              |             |             |             |             |
| GRIP2 GRIP2     | 49.19759517  |             | 15.23386881 | 14.28569205 |             |
| 41.48118589     |              |             |             |             |             |
| CNNM1 CNNM1     | 18.74194102  |             | 5.07795627  | 7.142846024 |             |
| 72.5920753      |              |             |             |             |             |
| OTUD7B OTUD7B   | 316.2702546  |             | 197.0247033 | 330.3566286 |             |
| 288.4827928     |              |             |             |             |             |
| CD109 CD109     | 3105.305352  |             | 2664.911451 | 616.9633253 |             |
| 960.666555      |              |             |             |             |             |
| TMEM242 TMEM242 | 1437.272602  |             | 1924.545426 | 1659.818845 |             |
| 1134.133332     |              |             |             |             |             |
| LOC441178       | LOC441178    |             | 0           | 0           | 2.678567259 |
| 0.942754225     |              |             |             |             |             |
| AOC4P AOC4P     | 1.171371313  |             | 0           | 0           | 0           |
| DLEU2L DLEU2L   | 19.91331233  |             | 10.15591254 | 10.71426904 |             |
| 8.484788022     |              |             |             |             |             |
| LYPLA2 LYPLA2   | 6310.177266  |             | 9917.248596 | 5240.170415 |             |
| 5940.29437      |              |             |             |             |             |
| LINC01353       | LINC01353    |             | 28.11291152 | 72.10697904 |             |
| 24.99996108     | 31.11088942  |             |             |             |             |
| LOC102723373    | LOC102723373 |             | 2.342742627 | 3.046773762 |             |
| 54.46420093     | 21.68334717  |             |             |             |             |
| FER1L4 FER1L4   | 5.856856567  |             | 2.031182508 | 0           | 10.37029647 |
| DLGAP4 DLGAP4   | 1468.899627  |             | 1918.451879 | 1893.747052 |             |
| 1543.288666     |              |             |             |             |             |
| CASC21 CASC21   | 0            | 0           | 2.678567259 | 0           |             |
| LOC101927560    | LOC101927560 |             | 5.856856567 | 0           | 28.5713841  |
| 25.45436407     |              |             |             |             |             |
| LOC102724467    | LOC102724467 |             | 18.74194102 | 21.32741634 |             |
| 42.85707615     | 19.79783872  |             |             |             |             |
| LOC101927587    | LOC101927587 |             | 4.685485254 | 0           | 24.99996108 |
| 21.68334717     |              |             |             |             |             |
| SRRM3 SRRM3     | 9.370970508  |             | 1.015591254 | 10.71426904 | 0           |
| PERP PERP       | 1301.393529  |             | 2317.579242 | 724.9988715 |             |
| 1402.818286     |              |             |             |             |             |
| HMCN2 HMCN2     | 0            | 3.046773762 | 0.892855753 | 0           |             |
| PLEKHA2 PLEKHA2 | 678.2239905  |             | 492.5617582 | 404.4636561 |             |
| 570.366306      |              |             |             |             |             |
| CECR2 CECR2     | 4.685485254  |             | 0           | 0           | 2.828262674 |
| MIR503 MIR503   | 1.171371313  |             | 0           | 0           | 0           |
| MIR499A MIR499A | 1.171371313  |             | 0           | 0.892855753 | 0           |

|              |              |             |             |             |             |             |             |
|--------------|--------------|-------------|-------------|-------------|-------------|-------------|-------------|
| MUC3A        | MUC3A        | 0           | 0           | 0.892855753 | 0           |             |             |
| SPDYE6       | SPDYE6       | 23.42742627 |             | 49.76397145 |             | 57.14276819 |             |
| 38.65292321  |              |             |             |             |             |             |             |
| LOC101928414 | LOC101928414 |             |             | 2.342742627 |             | 5.07795627  |             |
| 14.28569205  | 11.3130507   |             |             |             |             |             |             |
| LOC101928388 | LOC101928388 |             |             | 8.199599194 |             | 2.031182508 | 0           |
| 0            |              |             |             |             |             |             |             |
| LINC01479    | LINC01479    |             |             | 0           | 0           | 3.571423012 | 0           |
| LOC101929655 | LOC101929655 |             |             | 21.08468364 |             | 9.140321286 |             |
| 53.57134518  | 53.73699081  |             |             |             |             |             |             |
| LINC01359    | LINC01359    |             |             | 2.342742627 |             | 0           | 6.249990271 |
| 1.885508449  |              |             |             |             |             |             |             |
| LOC101929679 | LOC101929679 |             |             | 1.171371313 |             | 0           | 19.64282657 |
| 7.542033798  |              |             |             |             |             |             |             |
| LOC102724558 | LOC102724558 |             |             | 0           | 0           | 0           | 0.942754225 |
| CA2          | CA2          | 208.5040938 |             | 29.45214637 |             | 309.8209463 |             |
| 351.6473258  |              |             |             |             |             |             |             |
| PAPOLA       | PAPOLA       | 11712.54176 |             | 5370.446551 |             | 5545.527082 |             |
| 7159.275582  |              |             |             |             |             |             |             |
| CASC19       | CASC19       | 0           | 1.015591254 | 0           |             | 2.828262674 |             |
| LOC101926895 | LOC101926895 |             |             | 240.1311193 |             | 153.3542794 |             |
| 181.2497179  | 191.3791076  |             |             |             |             |             |             |
| LOC101929765 | LOC101929765 |             |             | 2.342742627 |             | 4.062365016 | 0           |
| 0            |              |             |             |             |             |             |             |
| LOC103171574 | LOC103171574 |             |             | 1.171371313 |             | 0           | 0           |
| LOC102724034 | LOC102724034 |             |             | 1.171371313 |             | 0           | 0           |
| LOC102723344 | LOC102723344 |             |             | 1.171371313 |             | 0           | 0           |
| LOC102723320 | LOC102723320 |             |             | 0           | 1.015591254 | 3.571423012 |             |
| 0            |              |             |             |             |             |             |             |
| LOC54944     | LOC54944     |             |             | 70.28227881 |             | 27.42096386 |             |
| 28.5713841   | 27.33987252  |             |             |             |             |             |             |
| UPK3B        | UPK3B        | 0           | 0           | 3.571423012 |             | 0.942754225 |             |
| A0AH-IT1     | A0AH-IT1     |             |             | 8.199599194 |             | 3.046773762 |             |
| 6.249990271  | 0            |             |             |             |             |             |             |
| LINC00400    | LINC00400    |             |             | 0           | 0           | 0           | 4.713771124 |
| LOC388436    | LOC388436    |             |             | 1.171371313 |             | 0           | 2.678567259 |
| 2.828262674  |              |             |             |             |             |             |             |
| TADA2A       | TADA2A       | 1280.308846 |             | 1567.057305 |             | 1183.926729 |             |
| 1065.312274  |              |             |             |             |             |             |             |
| SNRPD1       | SNRPD1       | 8904.764725 |             | 10698.23827 |             | 6429.454278 |             |
| 7524.121467  |              |             |             |             |             |             |             |
| SH3GL2       | SH3GL2       | 4.685485254 |             | 0           | 0           | 0           |             |
| RXRA         | RXRA         | 52.71170911 |             | 237.6483534 |             | 183.0354294 |             |
| 53.73699081  |              |             |             |             |             |             |             |
| SLC25A30-AS1 | SLC25A30-AS1 |             |             | 22.25605496 |             | 5.07795627  |             |
| 8.92855753   | 6.599279573  |             |             |             |             |             |             |
| LM07-AS1     | LM07-AS1     |             |             | 584.5142854 |             | 964.8116913 |             |
| 446.4278765  | 576.9655855  |             |             |             |             |             |             |
| ZNF316       | ZNF316       | 999.1797304 |             | 545.3725034 |             | 1024.105549 |             |
| 944.6397332  |              |             |             |             |             |             |             |

|              |              |             |             |             |
|--------------|--------------|-------------|-------------|-------------|
| PKD1L3       | PKD1L3       | 21.08468364 | 45.70160643 | 56.24991244 |
| 24.51160984  |              |             |             |             |
| LINC01314    | LINC01314    |             | 4.685485254 | 1.015591254 |
| 7.142846024  | 0            |             |             |             |
| ZNF213-AS1   | ZNF213-AS1   |             | 237.7883766 | 279.2875949 |
| 251.7853224  | 296.9675808  |             |             |             |
| PTCHD3       | PTCHD3       | 0           | 0.892855753 | 0           |
| ACCSL        | ACCSL        | 0           | 1.015591254 | 0           |
| PLAA         | PLAA         | 5081.408758 | 5464.896538 | 3671.422856 |
| 4393.234687  |              |             |             |             |
| SLC35F1      | SLC35F1      | 0           | 0           | 1.885508449 |
| C2orf68      | C2orf68      | 893.7563122 | 606.3079787 | 1078.56975  |
| 965.3803261  |              |             |             |             |
| ANKRD20A2    | ANKRD20A2    |             | 3.51411394  | 3.046773762 |
| 11.60712479  | 4.713771124  |             |             |             |
| C1QL3        | C1QL3        | 30.45565415 | 37.5768764  | 24.10710533 |
| 32.05364364  |              |             |             |             |
| SLC6A17      | SLC6A17      | 1.171371313 | 0           | 0           |
| IL17REL      | IL17REL      | 3.51411394  | 0           | 0           |
| CALHM1       | CALHM1       | 36.31251072 | 32.49892013 | 0           |
| LINC00412    | LINC00412    |             | 7.028227881 | 6.093547524 |
| 14.28569205  | 7.542033798  |             |             |             |
| LOC101929140 | LOC101929140 |             | 51.54033779 | 47.73278894 |
| 57.14276819  | 67.87830418  |             |             |             |
| LOC101929259 | LOC101929259 |             | 0           | 0           |
| LOC101927437 | LOC101927437 |             | 25.7701689  | 36.56128515 |
| 64.28561422  | 53.73699081  |             |             |             |
| LOC101928730 | LOC101928730 |             | 0           | 0           |
| 2.828262674  |              |             |             | 0.892855753 |
| ZNF710       | ZNF710       | 431.0646434 | 207.1806158 | 260.7138799 |
| 331.8494871  |              |             |             |             |
| LOC100507006 | LOC100507006 |             | 73.79639275 | 55.85751897 |
| 108.9284019  | 61.27902461  |             |             |             |
| ADPRH        | ADPRH        | 650.111079  | 1180.117037 | 374.9994163 |
| 858.8490987  |              |             |             |             |
| NMU          | NMU          | 63.25405093 | 28.43655511 | 67.85703723 |
| 16.96957604  |              |             |             |             |
| ENOPH1       | ENOPH1       | 3816.327739 | 4023.772549 | 3721.422779 |
| 3822.868381  |              |             |             |             |
| ING2         | ING2         | 425.2077868 | 496.6241232 | 716.9631697 |
| 492.1177053  |              |             |             |             |
| ZNF76        | ZNF76        | 2750.379844 | 2695.379188 | 4029.458013 |
| 3721.993679  |              |             |             |             |
| MAP3K4       | MAP3K4       | 2411.853534 | 1513.230969 | 1952.675532 |
| 2260.724631  |              |             |             |             |
| RPL34-AS1    | RPL34-AS1    |             | 23.42742627 | 41.63924142 |
| 74.99988325  | 55.62249926  |             |             |             |
| PANO         | PANO         | 36.31251072 | 19.29623383 | 35.71423012 |
| 18.85508449  |              |             |             |             |
| TBC1D19      | TBC1D19      | 318.6129973 | 309.7553325 | 347.3208879 |

|                 |               |               |               |  |  |
|-----------------|---------------|---------------|---------------|--|--|
| 367.6741476     |               |               |               |  |  |
| MSRA MSRA       | 119.479874    | 61.9510665    | 77.67845051   |  |  |
| 86.73338867     |               |               |               |  |  |
| CACNA1C-AS2     | CACNA1C-AS2   | 10.54234182   | 9.140321286   |  |  |
| 125.8926612     | 72.5920753    |               |               |  |  |
| LOC101928100    | LOC101928100  | 12.88508445   | 196.009112    |  |  |
| 581.2490952     | 49.96597391   |               |               |  |  |
| LOC101927267    | LOC101927267  | 409.9799597   | 508.8112183   |  |  |
| 165.1783143     | 165.9247436   |               |               |  |  |
| OR7E47P OR7E47P | 0 2.031182508 | 2.678567259   | 0             |  |  |
| NCK1 NCK1       | 2354.45634    | 2318.594833   | 2355.353476   |  |  |
| 2287.121749     |               |               |               |  |  |
| ZNF330 ZNF330   | 2503.220497   | 3229.580188   | 3221.423557   |  |  |
| 3503.274699     |               |               |               |  |  |
| SSR1 SSR1       | 13128.72968   | 13920.70932   | 12356.23077   |  |  |
| 12554.65801     |               |               |               |  |  |
| SRF SRF         | 2320.486572   | 2304.376555   | 1594.640375   |  |  |
| 1575.34231      |               |               |               |  |  |
| LOC101929162    | LOC101929162  | 420.5223015   | 447.875743    |  |  |
| 483.9278181     | 468.5488497   |               |               |  |  |
| TESC-AS1        | TESC-AS1      | 12.88508445   | 9.140321286   |  |  |
| 4.464278765     | 4.713771124   |               |               |  |  |
| STAC STAC       | 5.856856567   | 3.046773762   | 0 40.53843166 |  |  |
| HCLS1 HCLS1     | 32880.39277   | 34981.02515   | 20756.21769   |  |  |
| 25325.20674     |               |               |               |  |  |
| MAN2B2 MAN2B2   | 3142.789234   | 1966.184668   | 1401.783532   |  |  |
| 2932.908393     |               |               |               |  |  |
| ADAMTS1 ADAMTS1 | 12.88508445   | 211.2429808   | 31.24995136   |  |  |
| 14.14131337     |               |               |               |  |  |
| NBPF10 NBPF10   | 507.2037787   | 501.7020795   | 798.2130432   |  |  |
| 469.4916039     |               |               |               |  |  |
| GSTA7P GSTA7P   | 0 1.015591254 | 0             | 0             |  |  |
| LINCR-0001      | LINCR-0001    | 4.685485254   | 0 0           |  |  |
| 0.942754225     |               |               |               |  |  |
| CXorf67 CXorf67 | 0 0           | 0 5.656525348 |               |  |  |
| LOC101927964    | LOC101927964  | 3.51411394    | 0 0           |  |  |
| 1.885508449     |               |               |               |  |  |
| LOC101928150    | LOC101928150  | 10.54234182   | 14.21827756   |  |  |
| 31.24995136     | 30.16813519   |               |               |  |  |
| SLC16A12-AS1    | SLC16A12-AS1  | 0 0           | 0.892855753 0 |  |  |
| LOC101927472    | LOC101927472  | 5.856856567   | 4.062365016   |  |  |
| 15.1785478      | 16.02682182   |               |               |  |  |
| LOC101927692    | LOC101927692  | 29.28428284   | 2.031182508 0 |  |  |
| 1.885508449     |               |               |               |  |  |
| FAM53B-AS1      | FAM53B-AS1    | 43.3407386    | 23.35859884   |  |  |
| 26.78567259     | 9.427542247   |               |               |  |  |
| EDRF1-AS1       | EDRF1-AS1     | 187.4194102   | 220.3833021   |  |  |
| 131.2497957     | 181.9515654   |               |               |  |  |
| LINC01163       | LINC01163     | 7.028227881   | 5.07795627 0  |  |  |
| 5.656525348     |               |               |               |  |  |

|                 |              |             |             |             |   |
|-----------------|--------------|-------------|-------------|-------------|---|
| TCERG1L-AS1     | TCERG1L-AS1  | 0           | 2.031182508 | 0           | 0 |
| LINC01516       | LINC01516    | 0           | 1.015591254 | 0           | 0 |
| LOC101929431    | LOC101929431 | 39.82662466 | 27.42096386 |             |   |
| 15.1785478      | 17.91233027  |             |             |             |   |
| LINC01515       | LINC01515    | 0           | 0           | 6.249990271 | 0 |
| LOC101928994    | LOC101928994 | 3.51411394  | 1.015591254 |             |   |
| 2.678567259     | 4.713771124  |             |             |             |   |
| ZNF503 ZNF503   | 4.685485254  | 1.015591254 | 0           | 0           |   |
| LOC101929574    | LOC101929574 | 91.36696245 | 79.21611782 |             |   |
| 104.4641231     | 100.874702   |             |             |             |   |
| LOC102723703    | LOC102723703 | 35.1411394  | 19.29623383 |             |   |
| 25.89281684     | 12.25580492  |             |             |             |   |
| DYRK1B DYRK1B   | 534.1453189  | 482.4058457 | 591.9633643 |             |   |
| 401.6132997     |              |             |             |             |   |
| MCCC1 MCCC1     | 2730.466532  | 3666.284427 | 2302.674987 |             |   |
| 2337.087723     |              |             |             |             |   |
| CEMIP CEMIP     | 19.91331233  | 22.34300759 | 73.21417175 |             |   |
| 48.08046546     |              |             |             |             |   |
| LOC102724009    | LOC102724009 | 145.2500429 | 156.4010531 |             |   |
| 252.6781781     | 212.1197006  |             |             |             |   |
| C8orf59 C8orf59 | 2145.952246  | 1811.814797 | 2024.103992 |             |   |
| 2177.762259     |              |             |             |             |   |
| LOC100507316    | LOC100507316 | 105.4234182 | 105.6214904 |             |   |
| 133.928363      | 115.9587696  |             |             |             |   |
| PGM5P3-AS1      | PGM5P3-AS1   | 0           | 0           | 0.942754225 |   |
| LOC100507651    | LOC100507651 | 0           | 0           | 1.785711506 | 0 |
| C9orf41-AS1     | C9orf41-AS1  | 339.6976809 | 302.6461937 |             |   |
| 178.5711506     | 230.0320308  |             |             |             |   |
| HOMEZ HOMEZ     | 677.0526192  | 563.653146  | 779.4630724 |             |   |
| 784.371515      |              |             |             |             |   |
| LOC414300       | LOC414300    | 8.199599194 | 13.2026863  |             |   |
| 5.357134518     | 0            |             |             |             |   |
| LOC93432        | LOC93432     | 0           | 0           | 8.92855753  | 0 |
| LOC101927954    | LOC101927954 | 1564.952075 | 2146.959911 |             |   |
| 2107.139577     | 1961.871542  |             |             |             |   |
| RFX3-AS1        | RFX3-AS1     | 37.48388203 | 37.5768764  |             |   |
| 18.74997081     | 44.30944856  |             |             |             |   |
| CDC37L1-AS1     | CDC37L1-AS1  | 26.94154021 | 26.40537261 |             |   |
| 43.7499319      | 44.30944856  |             |             |             |   |
| PTPRD-AS1       | PTPRD-AS1    | 0           | 0           | 0.942754225 |   |
| FOCAD-AS1       | FOCAD-AS1    | 3.51411394  | 5.07795627  |             |   |
| 4.464278765     | 0.942754225  |             |             |             |   |
| LOC101929563    | LOC101929563 | 0           | 0           | 2.678567259 |   |
| 1.885508449     |              |             |             |             |   |
| LOC101928525    | LOC101928525 | 1464.214142 | 2759.361437 |             |   |
| 1783.925795     | 1739.381545  |             |             |             |   |
| MIR4674HG       | MIR4674HG    | 1.171371313 | 1.015591254 |             |   |
| 8.92855753      | 1.885508449  |             |             |             |   |
| LOC100507291    | LOC100507291 | 25.7701689  | 36.56128515 |             |   |
| 70.53560449     | 37.71016899  |             |             |             |   |



|                 |              |             |             |             |             |
|-----------------|--------------|-------------|-------------|-------------|-------------|
| LOC100507639    | LOC100507639 | 0           | 0           | 5.357134518 | 0           |
| LOC100996286    | LOC100996286 | 955.8389918 |             | 383.893494  |             |
| 308.9280905     | 487.4039342  |             |             |             |             |
| LINC00472       | LINC00472    | 0           | 0           | 0.892855753 | 0           |
| LOC102724000    | LOC102724000 | 0           | 0           | 2.678567259 | 0           |
| LOC100507406    | LOC100507406 | 44.51210991 |             | 62.96665775 |             |
| 16.96425931     | 16.96957604  |             |             |             |             |
| IFT74-AS1       | IFT74-AS1    | 0           | 3.046773762 | 0           |             |
| 0.942754225     |              |             |             |             |             |
| LOC100996583    | LOC100996583 | 77.31050669 |             | 72.10697904 |             |
| 206.249679      | 233.8030477  |             |             |             |             |
| RNU1-13P        | RNU1-13P     | 0           | 0           | 0           | 0.942754225 |
| RNVU1-8 RNVU1-8 | 3.51411394   | 2.031182508 |             | 0           | 6.599279573 |
| LOC101060498    | LOC101060498 | 11.71371313 |             | 11.17150379 |             |
| 24.10710533     | 0.942754225  |             |             |             |             |
| LOC100996348    | LOC100996348 | 1.171371313 |             | 0           | 1.785711506 |
|                 | 1.885508449  |             |             |             |             |
| LINC01465       | LINC01465    | 35.1411394  |             | 40.62365016 |             |
| 34.82137437     | 30.16813519  |             |             |             |             |
| ITIH4-AS1       | ITIH4-AS1    | 9.370970508 |             | 5.07795627  |             |
| 16.96425931     | 21.68334717  |             |             |             |             |
| MYLK-AS1        | MYLK-AS1     | 52.71170911 |             | 86.32525659 |             |
| 26.78567259     | 62.22177883  |             |             |             |             |
| LOC440982       | LOC440982    | 0           | 0           | 0           | 0.942754225 |
| LMLN-AS1        | LMLN-AS1     | 43.3407386  |             | 92.41880412 |             |
| 109.8212576     | 71.64932108  |             |             |             |             |
| LINC01410       | LINC01410    | 2.342742627 |             | 13.2026863  |             |
| 5.357134518     | 1.885508449  |             |             |             |             |
| ZNF385D-AS1     | ZNF385D-AS1  | 1.171371313 |             | 0           | 0           |
| STT3B STT3B     | 22580.52481  | 23501.79721 |             | 15905.33238 | 0           |
| 16832.87668     |              |             |             |             |             |
| GLYCTK-AS1      | GLYCTK-AS1   | 9.370970508 |             | 8.124730032 |             |
| 16.07140355     | 8.484788022  |             |             |             |             |
| PLCXD2-AS1      | PLCXD2-AS1   | 32.79839678 |             | 31.48332888 |             |
| 3.571423012     | 18.85508449  |             |             |             |             |
| ZBTB20 ZBTB20   | 204.9899799  | 249.8354485 |             | 1329.462216 |             |
| 1274.603712     |              |             |             |             |             |
| LOC101929754    | LOC101929754 | 0           | 0           | 0           | 0.942754225 |
| ZBTB20-AS4      | ZBTB20-AS4   | 1.171371313 |             | 2.031182508 |             |
| 3.571423012     | 6.599279573  |             |             |             |             |
| B4GALT4-AS1     | B4GALT4-AS1  | 108.9375322 |             | 128.9800893 |             |
| 266.9638702     | 161.2109724  |             |             |             |             |
| ATP13A4-AS1     | ATP13A4-AS1  | 1.171371313 |             | 3.046773762 |             |
| 0.892855753     | 0            |             |             |             |             |
| TM4SF19-AS1     | TM4SF19-AS1  | 9.370970508 |             | 10.15591254 |             |
| 25.89281684     | 10.37029647  |             |             |             |             |
| HDAC11-AS1      | HDAC11-AS1   | 2.342742627 |             | 6.093547524 |             |
| 22.32139383     | 12.25580492  |             |             |             |             |
| LOC101927854    | LOC101927854 | 0           | 0           | 0           | 6.599279573 |
| ARHGAP31-AS1    | ARHGAP31-AS1 | 4.685485254 |             | 5.07795627  | 0           |

|              |              |             |             |             |             |
|--------------|--------------|-------------|-------------|-------------|-------------|
|              | 0.942754225  |             |             |             |             |
| ERICH6-AS1   | ERICH6-AS1   | 91.36696245 |             | 87.34084785 |             |
| 77.67845051  | 33.93915209  |             |             |             |             |
| NAALADL2-AS2 | NAALADL2-AS2 | 0           | 0           | 0           | 0.942754225 |
| NAALADL2-AS1 | NAALADL2-AS1 | 0           | 0           | 0.892855753 | 0           |
| LINC01182    | LINC01182    | 0           | 0           | 3.571423012 | 0           |
| LOC101928131 | LOC101928131 | 0           | 0           | 0           | 0.942754225 |
| LINC00824    | LINC00824    | 0           | 9.140321286 |             | 219.6425152 |
|              | 101.8174563  |             |             |             |             |
| LOC51145     | LOC51145     | 2.342742627 |             | 0           | 0           |
| C1orf95      | C1orf95      | 0           | 1.015591254 | 0           | 0           |
| ZNF561-AS1   | ZNF561-AS1   | 130.0222158 |             |             | 261.0069523 |
| 291.0709755  | 205.520421   |             |             |             |             |
| ARRDC1-AS1   | ARRDC1-AS1   | 911.3268819 |             |             | 966.8428739 |
| 862.4986574  | 892.7882508  |             |             |             |             |
| LOC399886    | LOC399886    | 0           | 0           | 0           | 6.599279573 |
| LOC285043    | LOC285043    | 1.171371313 |             | 0           | 13.3928363  |
|              | 6.599279573  |             |             |             |             |
| LOC400997    | LOC400997    | 2.342742627 |             | 0           | 0           |
| 2.828262674  |              |             |             |             |             |
| LOC642757    | LOC642757    | 4.685485254 |             | 0           | 8.92855753  |
|              | 3.771016899  |             |             |             |             |
| LOC729083    | LOC729083    | 4.685485254 |             |             | 3.046773762 |
| 2.678567259  | 0            |             |             |             |             |
| H0XA-AS2     | H0XA-AS2     | 0           | 0           | 4.464278765 | 0           |
| LOC403323    | LOC403323    | 24.59879758 |             |             | 27.42096386 |
| 26.78567259  | 14.14131337  |             |             |             |             |
| LINC01296    | LINC01296    | 1.171371313 |             |             | 49.76397145 |
| 36.60708587  | 0.942754225  |             |             |             |             |
| LOC440446    | LOC440446    | 3.51411394  |             | 0           | 0           |
| DOK5         | DOK5         | 418.4235967 |             |             | 146.4283435 |
| 252.6581322  |              |             |             |             |             |
| DUXAP8       | DUXAP8       | 4.685485254 | 24.3741901  |             | 18.74997081 |
| LINC00969    | LINC00969    | 401.7803605 |             |             | 270.1472736 |
| 358.9280127  | 385.5864779  |             |             |             |             |
| LOC439933    | LOC439933    | 175.705697  |             |             | 145.2295493 |
| 263.3924471  | 318.650928   |             |             |             |             |
| CYP51A1-AS1  | CYP51A1-AS1  | 18.74194102 |             |             | 29.45214637 |
| 43.7499319   | 40.53843166  |             |             |             |             |
| BICC1        | BICC1        | 9.370970508 | 2.031182508 |             | 2.678567259 |
| 0.942754225  |              |             |             |             |             |
| LOC100049716 | LOC100049716 | 195.6190093 |             |             | 104.6058992 |
| 148.214055   | 317.7081737  |             |             |             |             |
| TGFB3        | TGFB3        | 38.65525334 | 13.2026863  |             | 7.142846024 |
| 32.99639787  |              |             |             |             |             |
| LOC730202    | LOC730202    | 51.54033779 |             |             | 96.48116913 |
| 17.85711506  | 32.05364364  |             |             |             |             |
| LOC728485    | LOC728485    | 60.9113083  |             |             | 37.5768764  |
| 14.28569205  | 36.76741476  |             |             |             |             |
| TSL          | TSL          | 4.685485254 | 1.015591254 | 0           | 0.942754225 |

|             |             |             |             |             |
|-------------|-------------|-------------|-------------|-------------|
| NINJ2       | NINJ2       | 702.8227881 | 901.8450336 | 525.8920385 |
| 451.5792736 |             |             |             |             |
| MTMR12      | MTMR12      | 3305.609847 | 3081.303865 | 2607.138799 |
| 2528.466831 |             |             |             |             |
| CLK2        | CLK2        | 1988.98849  | 1079.573503 | 1220.533814 |
| 1542.345912 |             |             |             |             |
| MFSD7       | MFSD7       | 19.91331233 | 17.26505132 | 49.99992217 |
| 47.13771124 |             |             |             |             |
| SDHA        | SDHA        | 20272.92332 | 27920.63476 | 21696.3948  |
| 19612.11614 |             |             |             |             |
| DAPK3       | DAPK3       | 1930.419925 | 2021.026596 | 1320.533659 |
| 1494.265446 |             |             |             |             |
| HAS1        | HAS1        | 0           | 10.71426904 | 0.942754225 |
| 0           |             |             |             |             |
| TMEM175     | TMEM175     | 1084.689836 | 985.1235164 | 1090.176874 |
| 1275.546466 |             |             |             |             |
| MAEA        | MAEA        | 4492.208987 | 5427.319662 | 4372.314623 |
| 4701.515319 |             |             |             |             |
| LOC399491   | LOC399491   |             | 596.2279986 | 213.2741634 |
| 383.0351181 | 460.0640617 |             |             |             |
| PKD1P6      | PKD1P6      | 371.3247064 | 132.026863  | 284.8209852 |
| 306.395123  |             |             |             |             |
| TMEM128     | TMEM128     | 1403.302834 | 1532.527202 | 1954.461243 |
| 2092.914379 |             |             |             |             |
| HTRA3       | HTRA3       | 35.1411394  | 1.015591254 | 23.21424958 |
| 14.14131337 |             |             |             |             |
| ZNF131      | ZNF131      | 1512.240366 | 1420.812164 | 2264.28219  |
| 1908.134551 |             |             |             |             |
| TRERF1      | TRERF1      | 2236.147837 | 217.3365284 | 668.748959  |
| 1597.968411 |             |             |             |             |
| FAM9B       | FAM9B       | 0           | 3.046773762 | 0           |
| 0           |             |             |             |             |
| TCEANC      | TCEANC      | 306.8992841 | 356.4725302 | 1206.248122 |
| 772.11571   |             |             |             |             |
| HNRNPR      | HNRNPR      | 21423.20995 | 22599.95218 | 14917.83392 |
| 17983.97959 |             |             |             |             |
| MAP3K6      | MAP3K6      | 483.7763525 | 283.3499599 | 372.320849  |
| 606.1909665 |             |             |             |             |
| LOC729867   | LOC729867   |             | 72.62502143 | 30.46773762 |
| 61.60704696 | 43.36669434 |             |             |             |
| CDCA3       | CDCA3       | 2947.170225 | 3934.400518 | 1169.641036 |
| 1683.759045 |             |             |             |             |
| ZNF823      | ZNF823      | 292.8428284 | 290.4590987 | 586.6062297 |
| 429.8959265 |             |             |             |             |
| SIN3B       | SIN3B       | 823.4740334 | 820.5977333 | 669.6418148 |
| 628.8170679 |             |             |             |             |
| ZNF461      | ZNF461      | 210.8468364 | 247.804266  | 563.3919802 |
| 349.7618174 |             |             |             |             |
| ZNF480      | ZNF480      | 1507.55488  | 1444.170763 | 2093.746741 |
| 1649.819893 |             |             |             |             |
| SEL1L3      | SEL1L3      | 8613.093268 | 7319.366168 | 5274.098933 |
| 6086.421275 |             |             |             |             |

|             |             |             |             |             |
|-------------|-------------|-------------|-------------|-------------|
| SPATA18     | SPATA18     | 15.22782708 | 27.42096386 | 18.74997081 |
| 23.56885562 |             |             |             |             |
| SNX14       | SNX14       | 4283.704893 | 3879.55859  | 3135.709405 |
| 3607.920418 |             |             |             |             |
| MIER3       | MIER3       | 1967.903807 | 1373.079375 | 1640.176018 |
| 1658.304681 |             |             |             |             |
| EIF3K       | EIF3K       | 6837.294357 | 8386.752576 | 5919.633643 |
| 5519.825986 |             |             |             |             |
| ZNF570      | ZNF570      | 160.4778699 | 178.7440607 | 296.42811   |
| 351.6473258 |             |             |             |             |
| TMEM53      | TMEM53      | 133.5363297 | 181.7908345 | 210.7139577 |
| 192.3218618 |             |             |             |             |
| LMBR1L      | LMBR1L      | 2356.799083 | 2299.298599 | 3598.208685 |
| 2978.160596 |             |             |             |             |
| RASGEF1B    | RASGEF1B    |             | 156.963756  | 59.91988399 |
| 821.4272928 | 725.920753  |             |             |             |
| MRPL9       | MRPL9       | 4599.975148 | 6681.57486  | 4170.529222 |
| 4288.588968 |             |             |             |             |
| TSEN15      | TSEN15      | 5195.031775 | 4438.13378  | 3335.709093 |
| 4704.343581 |             |             |             |             |
| ANGEL2      | ANGEL2      | 2387.254737 | 2139.850772 | 2264.28219  |
| 2453.989247 |             |             |             |             |
| LYPLAL1     | LYPLAL1     | 1054.234182 | 1280.660571 | 1209.819545 |
| 1145.446383 |             |             |             |             |
| PRIMPOL     | PRIMPOL     | 1358.790724 | 1074.495547 | 947.319954  |
| 1140.732612 |             |             |             |             |
| LOH12CR1    | LOH12CR1    |             | 1033.149498 | 1564.010531 |
| 994.6413089 | 955.9527839 |             |             |             |
| SLC9B2      | SLC9B2      | 1316.621356 | 1630.023963 | 1141.069652 |
| 1449.955998 |             |             |             |             |
| NUDT12      | NUDT12      | 37.48388203 | 7.109138778 | 48.21421066 |
| 98.9891936  |             |             |             |             |
| NKAIN2      | NKAIN2      | 2.342742627 | 0           | 0.942754225 |
| NAA40       | NAA40       | 1969.075178 | 1588.384721 | 855.3558114 |
| 1311.371127 |             |             |             |             |
| C11orf85    | C11orf85    |             | 2.342742627 | 3.046773762 |
| 17.85711506 | 10.37029647 |             |             |             |
| KIF3A       | KIF3A       | 1002.693844 | 1446.201946 | 1783.925795 |
| 1427.329896 |             |             |             |             |
| ERP27       | ERP27       | 378.3529342 | 326.0047926 | 150.8926223 |
| 231.9175393 |             |             |             |             |
| DERA        | DERA        | 2606.301172 | 3021.383981 | 1870.532803 |
| 1901.535271 |             |             |             |             |
| RAN         | RAN         | 43825.68632 | 56454.68663 | 36795.47844 |
| 38412.52089 |             |             |             |             |
| ZNF140      | ZNF140      | 1279.137474 | 1369.01701  | 2682.138682 |
| 1929.817898 |             |             |             |             |
| MTTP        | MTTP        | 3.51411394  | 14.21827756 | 6.249990271 |
| 3.771016899 |             |             |             |             |
| SEMA6A      | SEMA6A      | 35.1411394  | 30.46773762 | 25.89281684 |

|              |              |             |             |             |             |
|--------------|--------------|-------------|-------------|-------------|-------------|
| 84.84788022  |              |             |             |             |             |
| RNF19B       | RNF19B       | 643.0828511 | 814.5041857 | 555.3562784 |             |
| 606.1909665  |              |             |             |             |             |
| ZCCHC10      | ZCCHC10      | 2245.518808 | 1985.480902 | 1869.639947 |             |
| 1918.504847  |              |             |             |             |             |
| TEX38        | TEX38        | 2.342742627 | 3.046773762 | 13.3928363  |             |
| 10.37029647  |              |             |             |             |             |
| PIF0         | PIF0         | 5.856856567 | 3.046773762 | 0           | 12.25580492 |
| C1orf162     | C1orf162     |             | 17.5705697  | 49.76397145 |             |
| 1883.925639  |              | 977.636131  |             |             |             |
| CIART        | CIART        | 28.11291152 | 9.140321286 | 262.4995914 |             |
| 144.2413964  |              |             |             |             |             |
| PCDH18       | PCDH18       | 1.171371313 | 13.2026863  | 22.32139383 |             |
| 15.0840676   |              |             |             |             |             |
| C1orf131     | C1orf131     |             | 1437.272602 | 1444.170763 |             |
| 999.1055876  |              | 1254.805873 |             |             |             |
| RC3H1        | RC3H1        | 2329.857542 | 1371.048193 | 2005.354021 |             |
| 1915.676585  |              |             |             |             |             |
| FOSL1        | FOSL1        | 155.7923847 | 255.928996  | 167.8568816 |             |
| 296.0248266  |              |             |             |             |             |
| SLC35F3      | SLC35F3      | 343.2117948 | 799.2703169 | 289.285264  |             |
| 190.4363534  |              |             |             |             |             |
| DCD          | DCD          | 0           | 0           | 0           | 0.942754225 |
| MIA3         | MIA3         | 3873.724934 | 3390.043606 | 8449.986847 |             |
| 7977.58625   |              |             |             |             |             |
| SLC25A45     | SLC25A45     |             | 814.1030629 | 577.8714236 |             |
| 637.4990077  |              | 917.2998606 |             |             |             |
| EIF4B        | EIF4B        | 6388.659144 | 5786.838966 | 8363.379839 |             |
| 9532.187966  |              |             |             |             |             |
| ZNF556       | ZNF556       | 0           | 0           | 0           | 0.942754225 |
| MPND         | MPND         | 490.8045803 | 187.884382  | 141.9640647 |             |
| 213.0624548  |              |             |             |             |             |
| DDX46        | DDX46        | 3368.863898 | 3327.076948 | 2746.424296 |             |
| 3165.768687  |              |             |             |             |             |
| LOC102724105 | LOC102724105 |             | 30.45565415 | 15.23386881 |             |
| 81.24987353  |              | 51.85148236 |             |             |             |
| CCDC181      | CCDC181      | 4.685485254 | 2.031182508 | 9.821413283 |             |
| 3.771016899  |              |             |             |             |             |
| MRPL2        | MRPL2        | 1898.792899 | 2181.490014 | 1974.996926 |             |
| 1790.290273  |              |             |             |             |             |
| ABLIM3       | ABLIM3       | 28.11291152 | 0           | 6.249990271 | 27.33987252 |
| CD55         | CD55         | 3304.438475 | 4958.116502 | 7510.702594 |             |
| 4309.329561  |              |             |             |             |             |
| DNAJB1       | DNAJB1       | 8343.677866 | 9295.706748 | 13489.26472 |             |
| 9423.77123   |              |             |             |             |             |
| SYDE1        | SYDE1        | 28.11291152 | 24.3741901  | 17.85711506 |             |
| 16.02682182  |              |             |             |             |             |
| CIB3         | CIB3         | 1.171371313 | 1.015591254 | 2.678567259 | 0           |
| SCLT1        | SCLT1        | 1436.10123  | 1508.153012 | 936.6056849 |             |
| 1074.739816  |              |             |             |             |             |

|             |             |             |             |               |
|-------------|-------------|-------------|-------------|---------------|
| GMFG        | GMFG        | 19947.2821  | 23230.63435 | 8203.558659   |
| 10574.87414 |             |             |             |               |
| IBTK        | IBTK        | 5259.457197 | 4092.832754 | 2047.318242   |
| 2924.423605 |             |             |             |               |
| SRSF10      | SRSF10      | 867.9861433 | 1002.388568 | 925.8914159   |
| 971.9796057 |             |             |             |               |
| BSDC1       | BSDC1       | 3420.404235 | 3981.117716 | 4912.492353   |
| 4582.728286 |             |             |             |               |
| YEATS4      | YEATS4      | 3024.480731 | 2845.686694 | 1751.782987   |
| 2102.341921 |             |             |             |               |
| CNOT8       | CNOT8       | 8387.018604 | 8854.940144 | 8056.23746    |
| 7631.595449 |             |             |             |               |
| ZNF567      | ZNF567      | 664.1675347 | 593.1052924 | 1527.676193   |
| 1335.882736 |             |             |             |               |
| TMCC3       | TMCC3       | 40.99799597 | 25.38978135 | 0 41.48118589 |
| C11orf30    | C11orf30    | 2227.948238 | 2010.870683 |               |
| 2011.604012 | 2069.345523 |             |             |               |
| ACER3       | ACER3       | 911.3268819 | 869.3461135 | 459.8207128   |
| 954.0672754 |             |             |             |               |
| CSRP2       | CSRP2       | 30.45565415 | 77.18493531 | 8.92855753    |
| 7.542033798 |             |             |             |               |
| ANKRD42     | ANKRD42     | 188.5907815 | 153.3542794 | 872.3200707   |
| 541.140925  |             |             |             |               |
| SNRNP70     | SNRNP70     | 9324.115655 | 11238.53282 | 5650.884061   |
| 6616.249149 |             |             |             |               |
| MORN1       | MORN1       | 103.0806756 | 84.29407409 | 144.642632    |
| 99.93194782 |             |             |             |               |
| LONP2       | LONP2       | 5629.610532 | 6055.970648 | 4645.528483   |
| 4823.130614 |             |             |             |               |
| NR2C2AP     | NR2C2AP     | 1806.254565 | 2281.017957 | 2487.496128   |
| 2003.352728 |             |             |             |               |
| ZNF101      | ZNF101      | 3559.797422 | 3233.642553 | 3555.351609   |
| 3906.773507 |             |             |             |               |
| ZNF91       | ZNF91       | 1740.657772 | 925.2036324 | 2872.316958   |
| 3044.153392 |             |             |             |               |
| C19orf40    | C19orf40    | 573.9719436 | 742.3972067 |               |
| 331.2494844 | 411.9835962 |             |             |               |
| ETV2        | ETV2        | 15.22782708 | 30.46773762 | 29.46423985   |
| 16.02682182 |             |             |             |               |
| CDK19       | CDK19       | 459.1775549 | 248.8198572 | 111.6069691   |
| 193.2646161 |             |             |             |               |
| PPIA        | PPIA        | 88806.34476 | 107669.938  | 56063.30559   |
| 63829.17478 |             |             |             |               |
| TMC06       | TMC06       | 1076.490237 | 776.9273093 | 653.5704112   |
| 1174.671764 |             |             |             |               |
| MT1F        | MT1F        | 329.1553391 | 296.5526462 | 305.3566675   |
| 289.425547  |             |             |             |               |
| FAM221A     | FAM221A     | 110.1089035 | 155.3854619 | 367.8565702   |
| 256.4291491 |             |             |             |               |
| TJP1        | TJP1        | 0 0         | 0.892855753 | 0.942754225   |

|              |              |             |             |             |             |   |
|--------------|--------------|-------------|-------------|-------------|-------------|---|
| USP28        | USP28        | 4386.785569 | 3614.489273 | 1438.390618 |             |   |
| 2286.178995  |              |             |             |             |             |   |
| NUDT4        | NUDT4        | 4138.45485  | 4912.414896 | 4163.386376 |             |   |
| 3979.365583  |              |             |             |             |             |   |
| ERF          | ERF          | 270.5867734 | 107.6526729 | 171.4283046 |             |   |
| 172.5240231  |              |             |             |             |             |   |
| ARL1         | ARL1         | 2373.198281 | 2624.2878   | 2595.531674 |             |   |
| 2980.988859  |              |             |             |             |             |   |
| VASH2        | VASH2        | 52.71170911 | 74.13816155 | 4.464278765 |             |   |
| 30.16813519  |              |             |             |             |             |   |
| ZNF114       | ZNF114       | 28.11291152 | 41.63924142 | 12.49998054 |             |   |
| 32.99639787  |              |             |             |             |             |   |
| RRN3         | RRN3         | 4643.315887 | 4313.216056 | 5719.633954 |             |   |
| 5064.475695  |              |             |             |             |             |   |
| LOC100506679 | LOC100506679 |             | 64.42542224 | 73.12257029 |             |   |
| 66.07132572  | 60.33627038  |             |             |             |             |   |
| USP46-AS1    | USP46-AS1    |             | 33.96976809 | 18.28064257 |             |   |
| 9.821413283  | 19.79783872  |             |             |             |             |   |
| MKLN1-AS     | MKLN1-AS     |             | 118.3085027 | 118.8241767 |             |   |
| 135.7140745  | 161.2109724  |             |             |             |             |   |
| LOC401585    | LOC401585    |             | 18.74194102 | 35.54569389 |             |   |
| 16.96425931  | 10.37029647  |             |             |             |             |   |
| HNRNPUL1     | HNRNPUL1     |             | 11713.71313 | 6787.196351 |             |   |
| 5416.062998  | 5257.740311  |             |             |             |             |   |
| BAHD1        | BAHD1        | 564.6009731 | 178.7440607 | 418.7493482 |             |   |
| 345.9908005  |              |             |             |             |             |   |
| MTERF1       | MTERF1       | 1061.26241  | 1161.836395 | 1211.605257 |             |   |
| 1575.34231   |              |             |             |             |             |   |
| VPS39        | VPS39        | 7058.683535 | 7001.486105 | 7741.059379 |             |   |
| 6969.781983  |              |             |             |             |             |   |
| LOC100419583 | LOC100419583 |             | 4643.315887 | 4092.832754 |             |   |
| 4201.779174  | 4822.187859  |             |             |             |             |   |
| LOC100288152 | LOC100288152 |             | 2.342742627 | 23.35859884 |             |   |
| 33.92851862  | 15.0840676   |             |             |             |             |   |
| USP30        | USP30        | 730.9356996 | 943.484275  | 1766.068679 |             |   |
| 1051.170961  |              |             |             |             |             |   |
| LOC100507437 | LOC100507437 |             | 38.65525334 | 46.71719769 |             |   |
| 48.21421066  | 52.79423658  |             |             |             |             |   |
| NHLRC4       | NHLRC4       | 91.36696245 | 38.59246765 | 47.32135491 |             |   |
| 69.76381263  |              |             |             |             |             |   |
| LOC100507530 | LOC100507530 |             | 107.7661608 | 168.5881482 |             |   |
| 148.214055   | 140.4703795  |             |             |             |             |   |
| LOC101926926 | LOC101926926 |             | 24.59879758 | 6.093547524 |             |   |
| 11.60712479  | 8.484788022  |             |             |             |             |   |
| LOC101927003 | LOC101927003 |             | 25.7701689  | 52.81074521 |             |   |
| 60.71419121  | 42.42394011  |             |             |             |             |   |
| LOC101927066 | LOC101927066 |             | 1.171371313 | 0           | 0           | 0 |
| DIAPH2-AS1   | DIAPH2-AS1   |             | 0           | 0           | 3.571423012 | 0 |
| MYEF2        | MYEF2        | 634.8832519 | 353.4257564 | 357.1423012 |             |   |
| 522.2858405  |              |             |             |             |             |   |

|              |              |             |             |             |             |
|--------------|--------------|-------------|-------------|-------------|-------------|
| TMED3        | TMED3        | 2585.216489 | 3888.698912 | 1774.997237 |             |
| 1941.130949  |              |             |             |             |             |
| CDKN2AIP     | CDKN2AIP     |             | 2424.738619 | 3128.021062 |             |
| 4331.243258  | 3095.06212   |             |             |             |             |
| LOC101928323 | LOC101928323 |             | 2.342742627 | 0           | 0           |
| LOC102724297 | LOC102724297 |             | 32.79839678 | 39.60805891 |             |
| 40.17850889  | 19.79783872  |             |             |             |             |
| LOC102723582 | LOC102723582 |             | 9.370970508 | 12.18709505 |             |
| 15.1785478   | 15.0840676   |             |             |             |             |
| LOC101927056 | LOC101927056 |             | 0           | 1.015591254 | 21.42853807 |
|              | 14.14131337  |             |             |             |             |
| LINC01471    | LINC01471    |             | 0           | 0           | 0.942754225 |
| PAQR9-AS1    | PAQR9-AS1    |             | 16.39919839 | 26.40537261 |             |
| 37.49994163  | 7.542033798  |             |             |             |             |
| LOC102724699 | LOC102724699 |             | 3.51411394  | 4.062365016 |             |
| 1.785711506  | 8.484788022  |             |             |             |             |
| LOC100505920 | LOC100505920 |             | 4.685485254 | 4.062365016 | 0           |
|              | 2.828262674  |             |             |             |             |
| LOC101929337 | LOC101929337 |             | 1.171371313 | 1.015591254 |             |
| 0.892855753  | 0            |             |             |             |             |
| TUSC2        | TUSC2        | 2649.641911 | 3205.205998 | 2782.138526 |             |
| 2284.293486  |              |             |             |             |             |
| LOC101927815 | LOC101927815 |             | 28.11291152 | 29.45214637 |             |
| 8.92855753   | 12.25580492  |             |             |             |             |
| LOC101929229 | LOC101929229 |             | 1.171371313 | 4.062365016 | 0           |
|              | 0            |             |             |             |             |
| LOC101929066 | LOC101929066 |             | 19.91331233 | 12.18709505 |             |
| 46.42849916  | 23.56885562  |             |             |             |             |
| LOC101929237 | LOC101929237 |             | 0           | 1.015591254 | 0           |
| LOC101927067 | LOC101927067 |             | 3.51411394  | 0           | 0           |
| LOC101927221 | LOC101927221 |             | 10.54234182 | 23.35859884 |             |
| 27.67852834  | 29.22538097  |             |             |             |             |
| LOC101927543 | LOC101927543 |             | 0           | 2.031182508 | 4.464278765 |
|              | 0            |             |             |             |             |
| LOC101927588 | LOC101927588 |             | 4.685485254 | 29.45214637 | 0           |
|              | 0            |             |             |             |             |
| LOC101927657 | LOC101927657 |             | 2.342742627 | 2.031182508 | 0           |
|              | 0            |             |             |             |             |
| LOC101927822 | LOC101927822 |             | 1.171371313 | 0           | 0           |
| ERC1         | ERC1         | 1478.270598 | 1341.596047 | 1247.319487 |             |
| 1674.331503  |              |             |             |             |             |
| METTL8       | METTL8       | 1266.25239  | 1160.820803 | 881.2486282 |             |
| 1291.573288  |              |             |             |             |             |
| N6AMT1       | N6AMT1       | 324.4698538 | 374.7531727 | 444.642165  |             |
| 468.5488497  |              |             |             |             |             |
| LOC100506022 | LOC100506022 |             | 10.54234182 | 6.093547524 | 0           |
|              | 1.885508449  |             |             |             |             |
| OAZ2         | OAZ2         | 3529.341767 | 4270.561223 | 3621.422934 |             |
| 2835.804708  |              |             |             |             |             |
| APOBEC3H     | APOBEC3H     |             | 1115.14549  | 1740.723409 |             |



|                 |             |             |             |   |
|-----------------|-------------|-------------|-------------|---|
| 478.5706836     | 429.8959265 |             |             |   |
| POT1-AS1        | POT1-AS1    | 10.54234182 | 13.2026863  |   |
| 34.82137437     | 24.51160984 |             |             |   |
| ZNF169 ZNF169   | 173.3629544 | 155.3854619 | 358.035157  |   |
| 214.9479632     |             |             |             |   |
| RNU6-2 RNU6-2   | 71.45365012 | 21.32741634 | 58.9284797  |   |
| 24.51160984     |             |             |             |   |
| LLPH-AS1        | LLPH-AS1    | 58.56856567 | 80.23170907 |   |
| 58.9284797      | 48.08046546 |             |             |   |
| MT1G MT1G       | 263.5585455 | 175.697287  | 90.17843106 |   |
| 229.0892766     |             |             |             |   |
| TTY14 TTY14     | 14.05645576 | 0 0         | 11.3130507  |   |
| UNC93B1 UNC93B1 | 1046.034583 | 1405.578296 | 1345.53362  |   |
| 1476.353116     |             |             |             |   |
| LOC154872       | LOC154872   | 1.171371313 | 0 0         | 0 |
| NUDT17 NUDT17   | 171.0202118 | 134.0580455 | 250.8924666 |   |
| 198.9211414     |             |             |             |   |
| C1orf186        | C1orf186    | 3.51411394  | 5.07795627  |   |
| 10.71426904     | 27.33987252 |             |             |   |
| TBC1D3C TBC1D3C | 69.11090749 | 30.46773762 | 64.28561422 |   |
| 82.01961755     |             |             |             |   |
| LINC01058       | LINC01058   | 5.856856567 | 8.124730032 | 0 |
| 3.771016899     |             |             |             |   |
| LINC01068       | LINC01068   | 5.856856567 | 3.046773762 | 0 |
| 3.771016899     |             |             |             |   |
| LINC01269       | LINC01269   | 2.342742627 | 0 0         | 0 |
| LINC01396       | LINC01396   | 0 0         | 1.785711506 | 0 |
| SPATA17-AS1     | SPATA17-AS1 | 1.171371313 | 1.015591254 | 0 |
| 0               |             |             |             |   |
| CATIP-AS2       | CATIP-AS2   | 0 0         | 14.28569205 | 0 |
| BIRC6-AS2       | BIRC6-AS2   | 21.08468364 | 9.140321286 |   |
| 1.785711506     | 14.14131337 |             |             |   |
