# Supplementary material
Source: PubMed Central journal article supplement (PMC8517598)

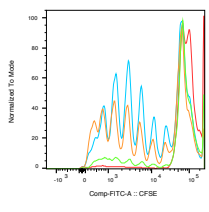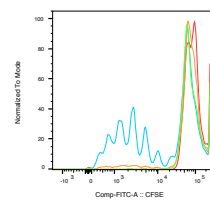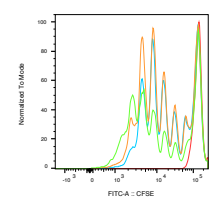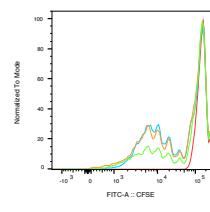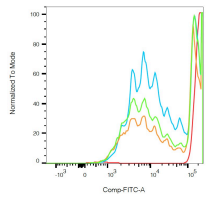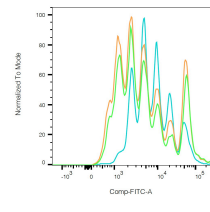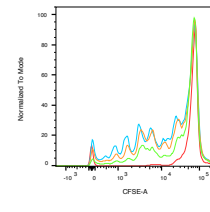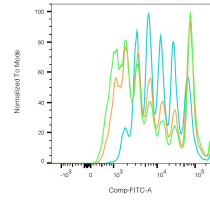

- Anti-CD3 + Anti-CD28
- Anti-CD3 + Anti-CD28 + PDL1
- Anti-CD3 + Anti-CD28 + PDL2
- Unstimulated

Supplement: IMM-164-555-s002.pdf [file IMM-164-555-s002.pdf]

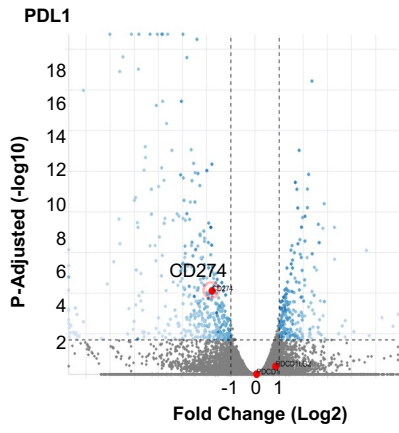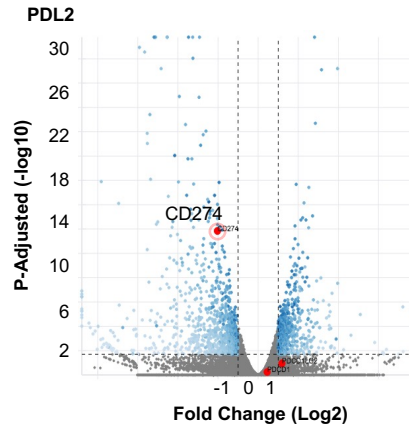

Supplement: IMM-164-555-s004.pdf [file IMM-164-555-s004.pdf]

**A.**

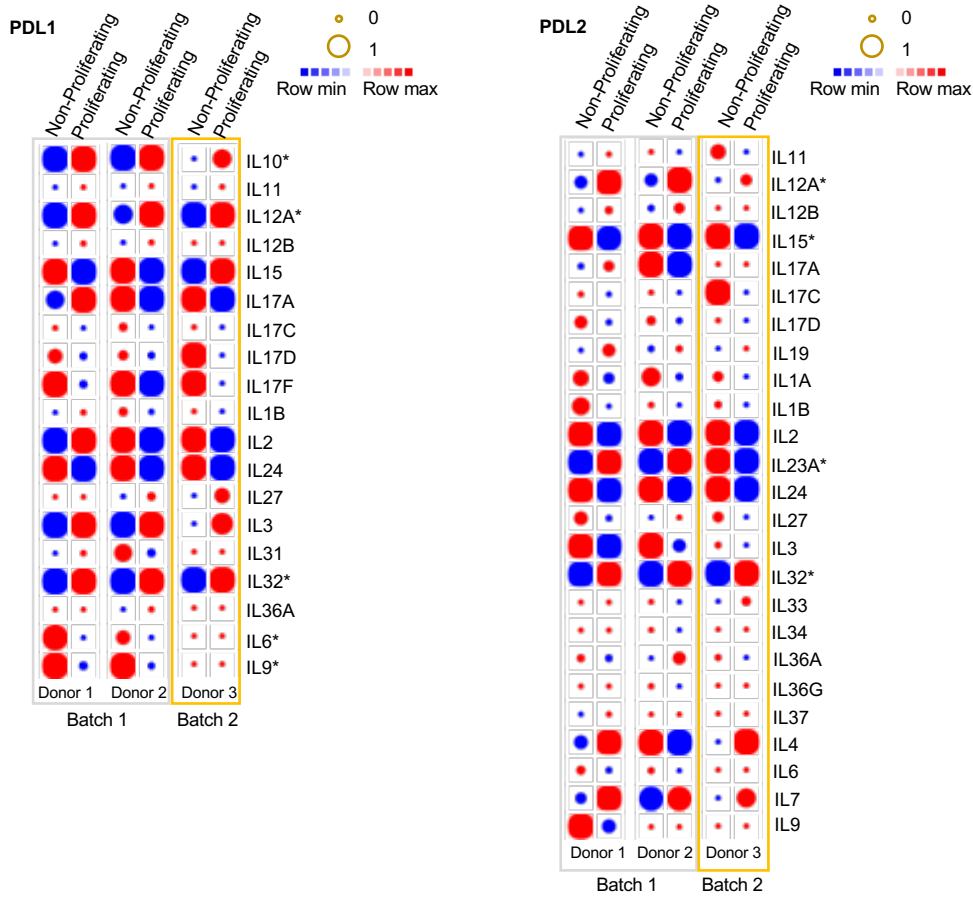

**B.**

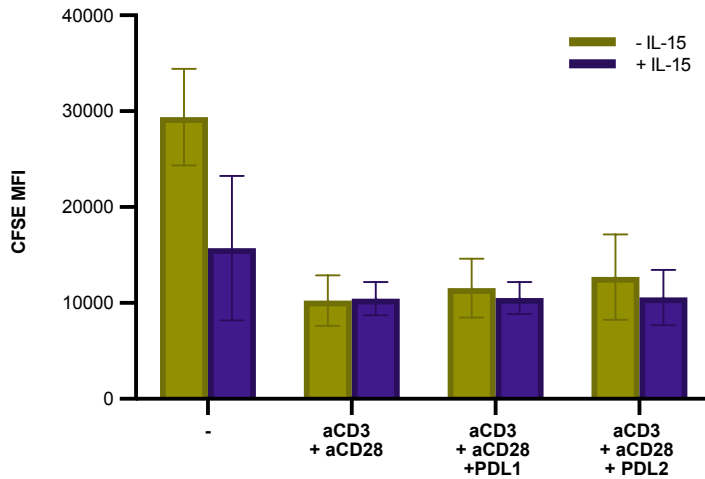

Supplement: IMM-164-555-s006.pdf [file IMM-164-555-s006.pdf]

**A.**

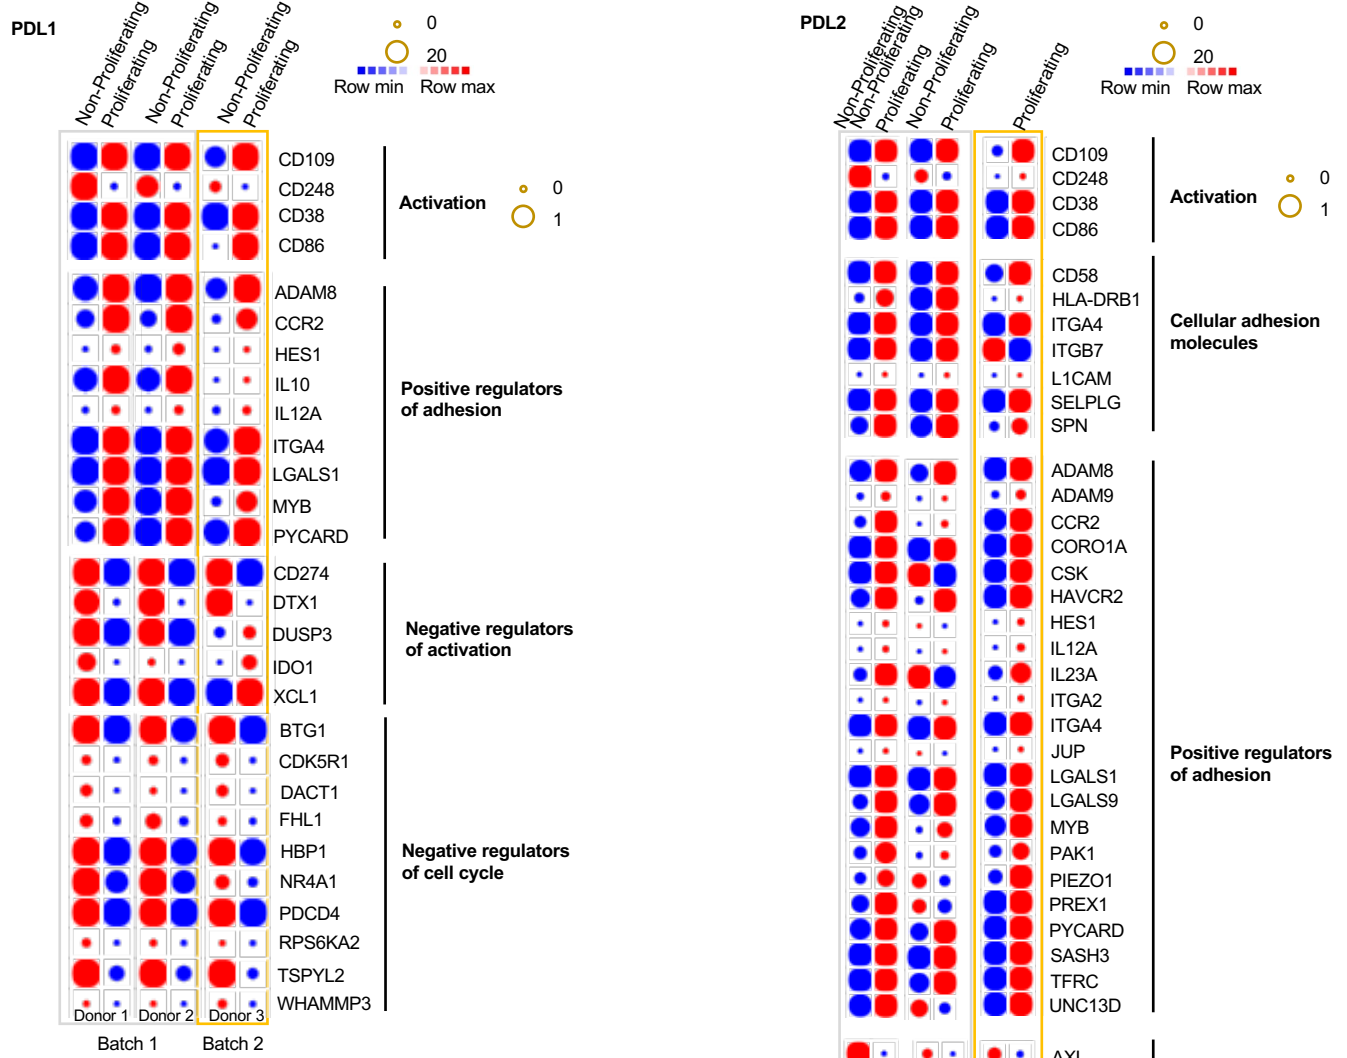

**B.**

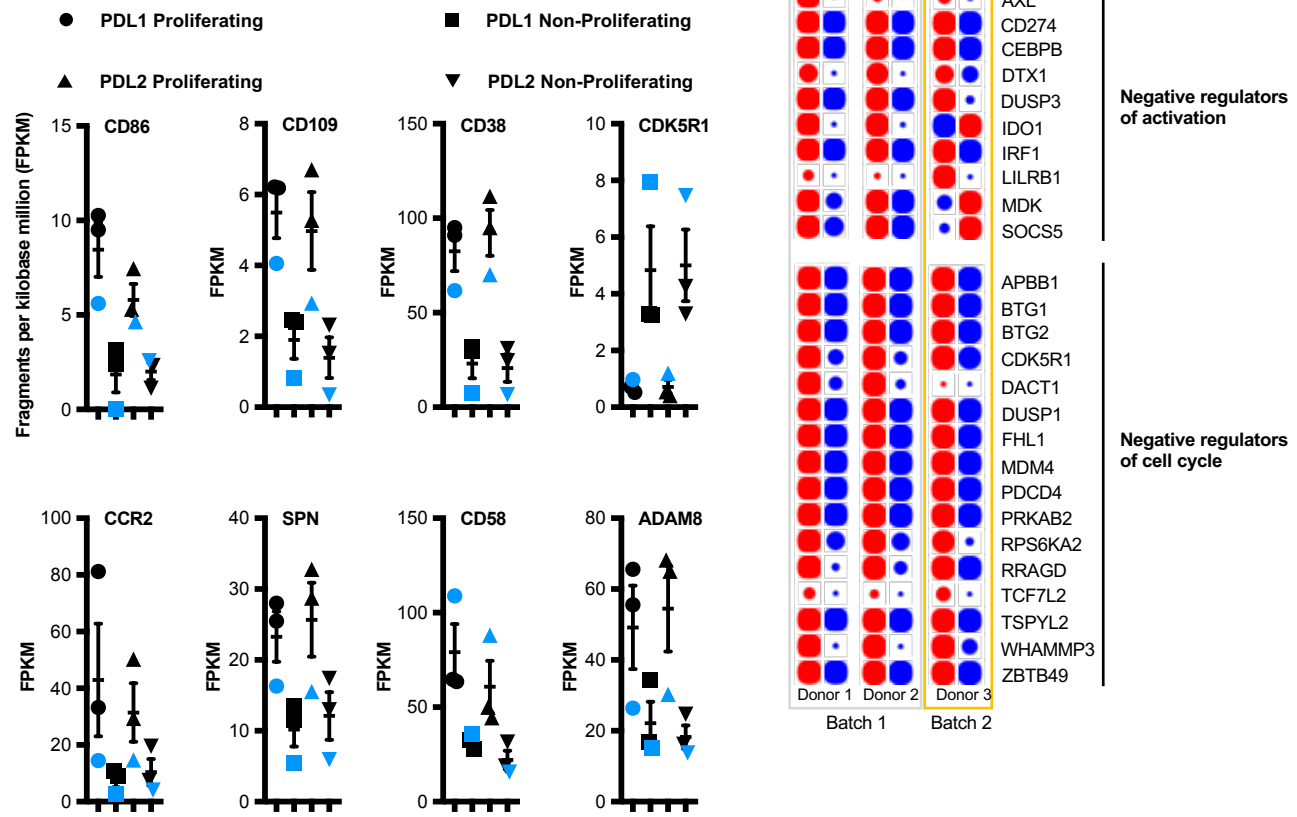

Supplement: IMM-164-555-s007.pdf [file IMM-164-555-s007.pdf]

**A.**

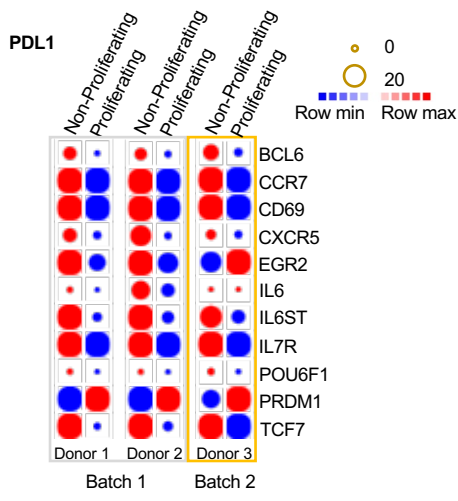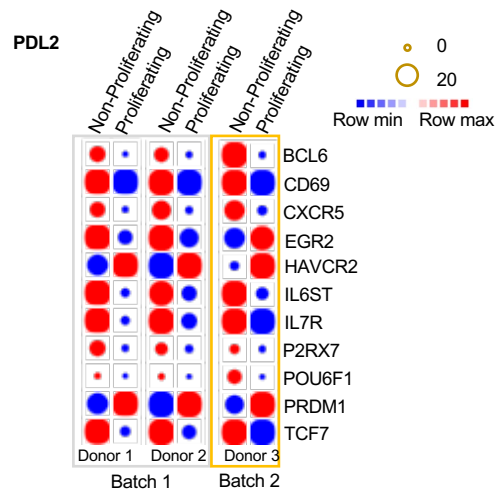

**B.**

● PDL1 Proliferating    ■ PDL1 Non-Proliferating    ▲ PDL2 Proliferating    ▼ PDL2 Non-Proliferating

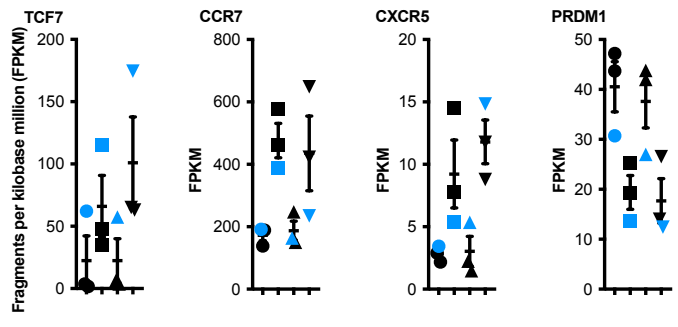

Supplement: IMM-164-555-s008.pdf [file IMM-164-555-s008.pdf]

**PDL1**

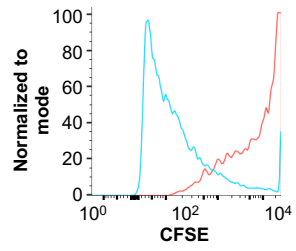

**PDL2**

Sorted - Non-Proliferating

Sorted - Proliferating

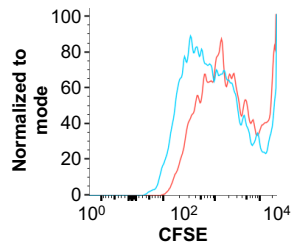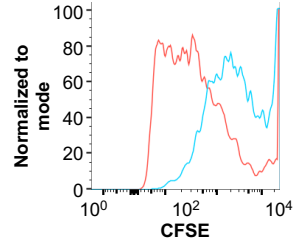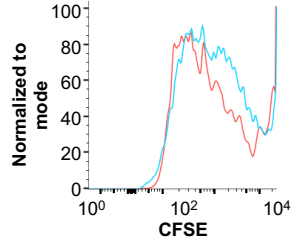

Supplement: IMM-164-555-s009.pdf [file IMM-164-555-s009.pdf]

**A.**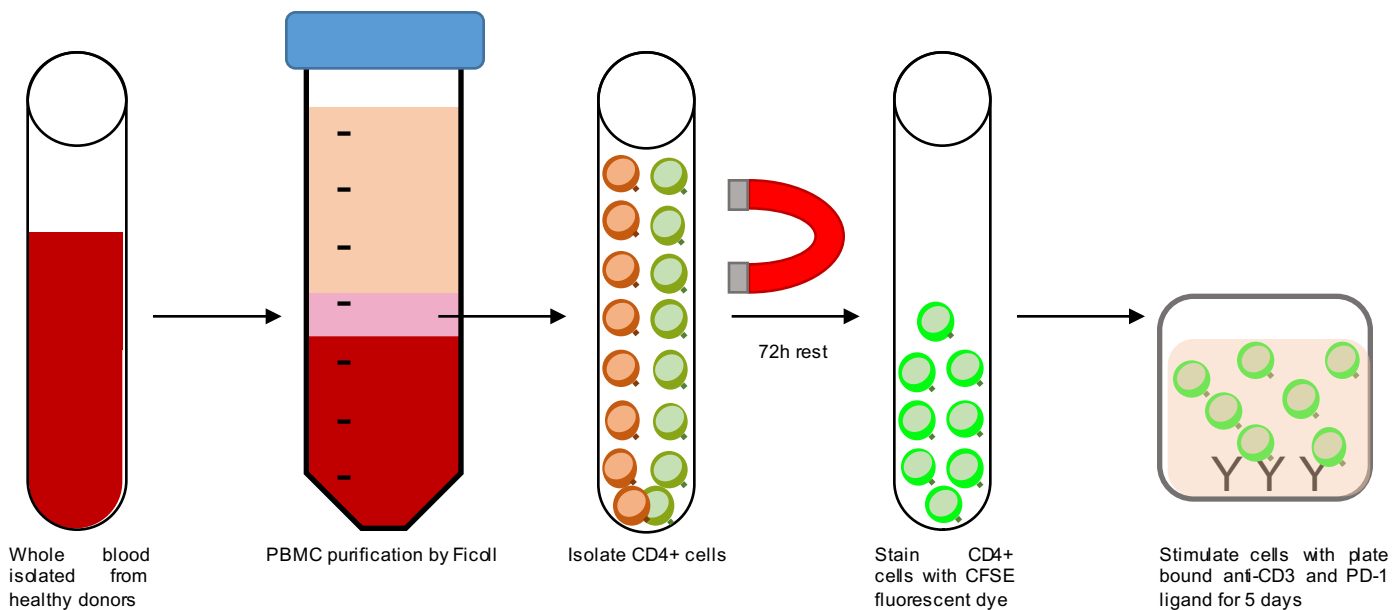**B.**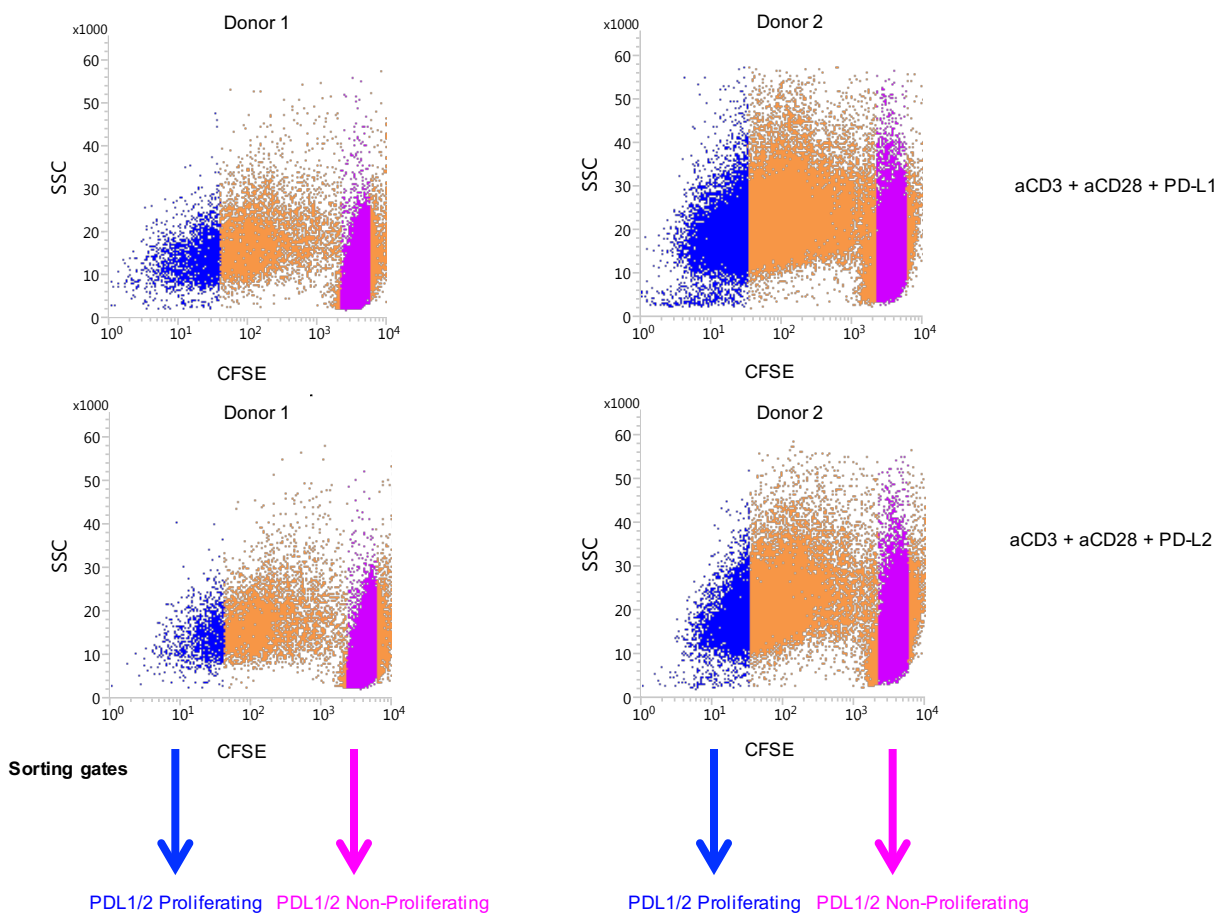

Supplement: IMM-164-555-s010.pdf [file IMM-164-555-s010.pdf]
